# Supplementary material for: Molecular Profiling of Ulcerative Colitis Subjects from the TURANDOT Trial Reveals Novel Pharmacodynamic/Efficacy Biomarkers
Source: PubMed Central journal article supplement — J Crohns Colitis. 2019 Mar 19;13(6):702–13. doi: 10.1093/ecco-jcc/jjy217 (PMC6535501; doi:10.1093/ecco-jcc/jjy217), 2019-03-19
Supplement: jjy217_suppl_supplementary_table_s1.pdf [file jjy217_suppl_supplementary_table_s1.pdf]

| gene               | varName                    | xwindow | gene_name | gene_type            | chr   | start     | end       | strand | length | mean_cou | pct_less_t | Estimate | Std.Error | teststat | pval     | qval     | bonfppval |
|--------------------|----------------------------|---------|-----------|----------------------|-------|-----------|-----------|--------|--------|----------|------------|----------|-----------|----------|----------|----------|-----------|
| ENSG00000173585.11 | TREATTXTPF-00547659 75mg   | Week12  | CCR9      | protein_coding       | chr3  | 45927996  | 45944667  | +      | 2807   | 184.3779 | 0.005525   | 1.593805 | 0.173707  | 9.175234 | 7.50E-18 | 7.11E-13 | 7.11E-13  |
| ENSG00000173585.11 | TREATTXTPF-00547659 225mg  | Week12  | CCR9      | protein_coding       | chr3  | 45927996  | 45944667  | +      | 2807   | 184.3779 | 0.005525   | 1.313056 | 0.178407  | 7.359898 | 1.78E-12 | 8.43E-08 | 1.69E-07  |
| ENSG00000173585.11 | TREATTXTPF-00547659 22.5mg | Week12  | CCR9      | protein_coding       | chr3  | 45927996  | 45944667  | +      | 2807   | 184.3779 | 0.005525   | 0.999538 | 0.175722  | 5.688166 | 3.05E-08 | 0.000964 | 0.002892  |
| ENSG00000204599.10 | TREATTXTPF-00547659 225mg  | Week12  | TRIM39    | protein_coding       | chr6  | 30294256  | 30311506  | +      | 4249   | 1161.498 | 0          | 0.194882 | 0.038266  | 5.092787 | 6.25E-07 | 0.013609 | 0.059229  |
| ENSG00000110042.3  | TREATTXTPF-00547659 225mg  | Week12  | DTX4      | protein_coding       | chr11 | 58938903  | 58976600  | +      | 6072   | 687.9337 | 0          | 0.477499 | 0.09429   | 5.06415  | 7.18E-07 | 0.013609 | 0.068045  |
| ENSG00000205464.7  | TREATTXTPF-00547659 225mg  | Week12  | ATP6AP1L  | protein_coding       | chr5  | 81575281  | 81682796  | +      | 7185   | 50.12818 | 0.01105    | 0.694087 | 0.142939  | 4.855832 | 1.93E-06 | 0.030547 | 0.183284  |
| ENSG00000156804.3  | TREATTXTPF-00547659 225mg  | Week12  | FBXO32    | protein_coding       | chr8  | 124510129 | 124553446 | -      | 7395   | 872.9326 | 0          | 0.463254 | 0.096297  | 4.810661 | 2.39E-06 | 0.03232  | 0.22624   |
| ENSG00000100100.8  | TREATTXTPF-00547659 225mg  | Week12  | PIK3IP1   | protein_coding       | chr22 | 31677579  | 31688520  | -      | 3805   | 7283.712 | 0          | 0.454792 | 0.0952    | 4.777241 | 2.79E-06 | 0.033014 | 0.264114  |
| ENSG00000236901.3  | TREATTXTPF-00547659 225mg  | Week12  | MIR600HC  | sense_intronic       | chr9  | 125871773 | 125877756 | -      | 5984   | 485.6696 | 0          | 0.642189 | 0.135416  | 4.742342 | 3.27E-06 | 0.034463 | 0.310167  |
| ENSG00000273307.1  | TREATTXTPF-00547659 225mg  | Week12  | RP11-58E2 | lincRNA              | chr14 | 50508361  | 50555893  | -      | 534    | 4.693923 | 0.287293   | 0.765115 | 0.162367  | 4.712251 | 3.75E-06 | 0.035601 | 0.356008  |
| ENSG00000135898.5  | TREATTXTPF-00547659 225mg  | Week12  | GPR55     | protein_coding       | chr2  | 231772033 | 231825781 | -      | 4130   | 293.2188 | 0          | 0.49091  | 0.106774  | 4.597655 | 6.31E-06 | 0.045675 | 0.597973  |
| ENSG00000103222.14 | TREATTXTPF-00547659 225mg  | Week12  | ABCC1     | protein_coding       | chr16 | 16043434  | 16236931  | +      | 7575   | 2502.546 | 0          | 0.317078 | 0.069672  | 4.551034 | 7.76E-06 | 0.045675 | 0.736298  |
| ENSG00000188822.6  | TREATTXTPF-00547659 225mg  | Week12  | CNR2      | protein_coding       | chr1  | 24197016  | 24285549  | -      | 5468   | 786.9757 | 0          | 0.50218  | 0.110511  | 4.544148 | 8.01E-06 | 0.045675 | 0.759171  |
| ENSG00000152127.4  | TREATTXTPF-00547659 225mg  | Week12  | MGAT5     | protein_coding       | chr2  | 134877554 | 135212192 | +      | 8578   | 2830.033 | 0          | 0.30403  | 0.066912  | 4.543729 | 8.02E-06 | 0.045675 | 0.760586  |
| ENSG0000005884.13  | TREATTXTPF-00547659 225mg  | Week12  | ITGA3     | protein_coding       | chr17 | 48133332  | 48167845  | +      | 9802   | 186.1304 | 0.001105   | 0.508317 | 0.112104  | 4.534328 | 8.36E-06 | 0.045675 | 0.792974  |
| ENSG0000010319.2   | TREATTXTPF-00547659 225mg  | Week12  | SEMA3G    | protein_coding       | chr3  | 52467069  | 52479101  | -      | 5011   | 38.3989  | 0.01326    | 0.69734  | 0.15412   | 4.524667 | 8.73E-06 | 0.045675 | 0.827637  |
| ENSG00000107263.14 | TREATTXTPF-00547659 225mg  | Week12  | RAPGEF1   | protein_coding       | chr9  | 134452157 | 134615461 | -      | 7123   | 9571.687 | 0          | 0.267105 | 0.059218  | 4.510505 | 9.29E-06 | 0.045675 | 0.881093  |
| ENSG00000149485.8  | TREATTXTPF-00547659 225mg  | Week12  | PRDM11    | protein_coding       | chr11 | 45115564  | 45247734  | +      | 5527   | 132.4961 | 0.00221    | 0.42709  | 0.094719  | 4.509009 | 9.35E-06 | 0.045675 | 0.886931  |
| ENSG00000107957.12 | TREATTXTPF-00547659 225mg  | Week12  | SH3PXD2A  | protein_coding       | chr10 | 105348285 | 105615301 | -      | 12436  | 533.7492 | 0          | 0.495823 | 0.110052  | 4.505362 | 9.50E-06 | 0.045675 | 0.901317  |
| ENSG00000107021.11 | TREATTXTPF-00547659 225mg  | Week12  | TBC1D13   | protein_coding       | chr9  | 131549483 | 131572711 | +      | 3982   | 1851.701 | 0          | 0.229228 | 0.050982  | 4.496232 | 9.89E-06 | 0.045675 | 0.938315  |
| ENSG00000269837.1  | TREATTXTPF-00547659 225mg  | Week12  | RP11-15H; | pseudogene           | chr19 | 23437855  | 23440741  | -      | 2887   | 301.9768 | 0          | 0.47108  | 0.105081  | 4.483039 | 1.05E-05 | 0.045675 | 0.994366  |
| ENSG00000167106.7  | TREATTXTPF-00547659 225mg  | Week12  | FAM102A   | protein_coding       | chr9  | 130702858 | 130742792 | -      | 6100   | 7490.061 | 0          | 0.493336 | 0.110316  | 4.472039 | 1.10E-05 | 0.045675 | 1         |
| ENSG00000133627.13 | TREATTXTPF-00547659 225mg  | Week12  | ACTR3B    | protein_coding       | chr7  | 152456834 | 152552463 | +      | 6024   | 212.7072 | 0          | 0.260509 | 0.058273  | 4.470518 | 1.11E-05 | 0.045675 | 1         |
| ENSG00000182319.5  | TREATTXTPF-00547659 225mg  | Week12  | SGK223    | protein_coding       | chr8  | 8175258   | 8244008   | -      | 4892   | 1131.961 | 0          | 0.424345 | 0.09557   | 4.440137 | 1.27E-05 | 0.047462 | 1         |
| ENSG00000170260.4  | TREATTXTPF-00547659 225mg  | Week12  | ZNF212    | protein_coding       | chr7  | 148936742 | 148952700 | +      | 3182   | 851.5006 | 0          | 0.279957 | 0.063283  | 4.423919 | 1.36E-05 | 0.047462 | 1         |
| ENSG00000162894.7  | TREATTXTPF-00547659 225mg  | Week12  | FAIM3     | protein_coding       | chr1  | 207077731 | 207096592 | -      | 2348   | 8873.392 | 0          | 0.445909 | 0.100927  | 4.418144 | 1.39E-05 | 0.047462 | 1         |
| ENSG00000197283.8  | TREATTXTPF-00547659 225mg  | Week12  | SYNGAP1   | protein_coding       | chr6  | 33387847  | 33421466  | +      | 7013   | 1170.644 | 0          | 0.434529 | 0.098354  | 4.418031 | 1.39E-05 | 0.047462 | 1         |
| ENSG00000268049.1  | TREATTXTPF-00547659 225mg  | Week12  | CTD-2619; | antisense            | chr19 | 58869365  | 58870969  | +      | 1154   | 22.99116 | 0.026519   | 0.685595 | 0.155243  | 4.416271 | 1.40E-05 | 0.047462 | 1         |
| ENSG00000107815.3  | TREATTXTPF-00547659 225mg  | Week12  | C10orf2   | protein_coding       | chr10 | 102747124 | 102754158 | +      | 3508   | 416.4409 | 0.001105   | 0.457375 | 0.103987  | 4.398395 | 1.52E-05 | 0.047462 | 1         |
| ENSG00000159958.3  | TREATTXTPF-00547659 225mg  | Week12  | TNFRSF13  | protein_coding       | chr22 | 42321045  | 42322822  | -      | 926    | 229.9138 | 0.00442    | 0.653156 | 0.148584  | 4.39587  | 1.53E-05 | 0.047462 | 1         |
| ENSG00000140326.8  | TREATTXTPF-00547659 225mg  | Week12  | CDAN1     | protein_coding       | chr15 | 43015757  | 43029324  | -      | 5428   | 607.1425 | 0          | 0.309647 | 0.070555  | 4.388728 | 1.58E-05 | 0.047462 | 1         |
| ENSG00000177951.13 | TREATTXTPF-00547659 225mg  | Week12  | BET1L     | protein_coding       | chr11 | 167784    | 207428    | -      | 3868   | 2363.464 | 0          | 0.251167 | 0.057557  | 4.363794 | 1.76E-05 | 0.047462 | 1         |
| ENSG00000161328.10 | TREATTXTPF-00547659 225mg  | Week12  | LRRC56    | protein_coding       | chr11 | 537527    | 554916    | +      | 2769   | 121.7127 | 0.003315   | 0.552075 | 0.126881  | 4.351111 | 1.86E-05 | 0.047462 | 1         |
| ENSG00000126353.3  | TREATTXTPF-00547659 225mg  | Week12  | CCR7      | protein_coding       | chr17 | 38710021  | 38721724  | +      | 2508   | 8095.179 | 0          | 0.471174 | 0.108334  | 4.349294 | 1.87E-05 | 0.047462 | 1         |
| ENSG00000246582.2  | TREATTXTPF-00547659 225mg  | Week12  | RP11-1145 | processed_transcript | chr8  | 23081984  | 23088439  | +      | 2445   | 180.3293 | 0.00221    | 0.460306 | 0.105896  | 4.346784 | 1.89E-05 | 0.047462 | 1         |
| ENSG00000120942.9  | TREATTXTPF-00547659 225mg  | Week12  | UBIAD1    | protein_coding       | chr1  | 11333263  | 11356106  | +      | 5082   | 1106.94  | 0          | 0.368893 | 0.084896  | 4.34569  | 1.90E-05 | 0.047462 | 1         |
| ENSG00000157978.7  | TREATTXTPF-00547659 225mg  | Week12  | LDLRAP1   | protein_coding       | chr1  | 25870071  | 25895377  | +      | 5397   | 7052.822 | 0          | 0.386495 | 0.088963  | 4.344437 | 1.91E-05 | 0.047462 | 1         |
| ENSG00000189319.9  | TREATTXTPF-00547659 225mg  | Week12  | FAM53B    | protein_coding       | chr10 | 126307861 | 126432838 | +      | 6424   | 6455.244 | 0          | 0.266653 | 0.06144   | 4.34003  | 1.95E-05 | 0.047462 | 1         |
| ENSG00000083814.8  | TREATTXTPF-00547659 225mg  | Week12  | ZNF671    | protein_coding       | chr19 | 58231119  | 58238992  | -      | 3532   | 892.6398 | 0          | 0.295616 | 0.068204  | 4.334294 | 2.00E-05 | 0.047462 | 1         |
| ENSG00000138002.10 | TREATTXTPF-00547659 225mg  | Week12  | IFT172    | protein_coding       | chr2  | 27667238  | 27712656  | -      | 8401   | 312.7724 | 0          | 0.397261 | 0.091775  | 4.328648 | 2.05E-05 | 0.047462 | 1         |
| ENSG00000204252.8  | TREATTXTPF-00547659 225mg  | Week12  | HLA-DOA   | protein_coding       | chr6  | 32971955  | 32977389  | -      | 4012   | 1999.411 | 0          | 0.451968 | 0.104817  | 4.311981 | 2.20E-05 | 0.047462 | 1         |
| ENSG00000230555.2  | TREATTXTPF-00547659 225mg  | Week12  | RP11-517F | lincRNA              | chr10 | 43916186  | 43917548  | +      | 760    | 31.65193 | 0.01105    | 0.537199 | 0.124618  | 4.310769 | 2.21E-05 | 0.047462 | 1         |
| ENSG00000188389.6  | TREATTXTPF-00547659 75mg   | Week12  | PDCD1     | protein_coding       | chr2  | 242792033 | 242801060 | -      | 2114   | 330.3768 | 0          | 0.529022 | 0.122758  | 4.309473 | 2.22E-05 | 0.047462 | 1         |
| ENSG0000082014.12  | TREATTXTPF-00547659 75mg   | Week12  | SMARCD3   | protein_coding       | chr7  | 150935850 | 150974982 | -      | 5198   | 2218.819 | 0          | -0.27882 | 0.064767  | -4.30498 | 2.26E-05 | 0.047462 | 1         |
| ENSG00000163935.9  | TREATTXTPF-00547659 225mg  | Week12  | SFMBT1    | protein_coding       | chr3  | 52937588  | 53080766  | -      | 5676   | 511.232  | 0          | 0.383614 | 0.089607  | 4.281085 | 2.51E-05 | 0.047462 | 1         |
| ENSG00000244119.1  | TREATTXTPF-00547659 225mg  | Week12  | PDCL3P4   | pseudogene           | chr3  | 101431316 | 101432035 | +      | 720    | 81.16906 | 0.005525   | 0.54375  | 0.1273    | 4.271414 | 2.61E-05 | 0.047462 | 1         |
| ENSG00000121413.8  | TREATTXTPF-00547659 225mg  | Week12  | ZSCAN18   | protein_coding       | chr19 | 58595205  | 58629794  | +      | 8307   | 970.2564 | 0          | 0.411573 | 0.096366  | 4.270946 | 2.62E-05 | 0.047462 | 1         |
| ENSG00000065457.6  | TREATTXTPF-00547659 225mg  | Week12  | ADAT1     | protein_coding       | chr16 | 75630879  | 75657198  | -      | 4486   | 773.9569 | 0          | 0.341209 | 0.079912  | 4.269826 | 2.63E-05 | 0.047462 | 1         |
| ENSG00000043143.16 | TREATTXTPF-00547659 225mg  | Week12  | PHF15     | protein_coding       | chr5  | 133860003 | 133918918 | +      | 9873   | 4999.319 | 0          | 0.334902 | 0.078513  | 4.265575 | 2.68E-05 | 0.047462 | 1         |
| ENSG00000171649.7  | TREATTXTPF-00547659 225mg  | Week12  | ZIK1      | protein_coding       | chr19 | 58089824  | 58105145  | +      | 5257   | 248.0177 | 0.001105   | 0.497566 | 0.117043  | 4.251116 | 2.84E-05 | 0.047462 | 1         |
| ENSG00000011275.14 | TREATTXTPF-00547659 225mg  | Week12  | RNF216    | protein_coding       | chr7  | 5659678   | 5821370   | -      | 7619   | 4070.25  | 0          | 0.240075 | 0.056494  | 4.24956  | 2.86E-05 | 0.047462 | 1         |
| ENSG00000073849.10 | TREATTXTPF-00547659 225mg  | Week12  | ST6GAL1   | protein_coding       | chr3  | 186648274 | 186796341 | +      | 9151   |          |            |          |           |          |          |          |           |

|                    |                           |        |           |                      |       |           |           |   |       |          |          |          |          |          |          |          |   |
|--------------------|---------------------------|--------|-----------|----------------------|-------|-----------|-----------|---|-------|----------|----------|----------|----------|----------|----------|----------|---|
| ENSG00000186810.7  | TREATTXTPF-00547659 75mg  | Week12 | CXCR3     | protein_coding       | chrX  | 70835766  | 70838367  | - | 1868  | 1069.003 | 0        | 0.509053 | 0.120273 | 4.232488 | 3.08E-05 | 0.047462 | 1 |
| ENSG00000107719.8  | TREATTXTPF-00547659 225mg | Week12 | PALD1     | protein_coding       | chr10 | 72238577  | 72328205  | + | 4555  | 47.20663 | 0.009945 | 0.584645 | 0.138153 | 4.231866 | 3.08E-05 | 0.047462 | 1 |
| ENSG00000134954.10 | TREATTXTPF-00547659 225mg | Week12 | ETS1      | protein_coding       | chr11 | 128328656 | 128457453 | - | 7153  | 21821.86 | 0        | 0.4884   | 0.115436 | 4.230926 | 3.10E-05 | 0.047462 | 1 |
| ENSG00000184208.10 | TREATTXTPF-00547659 225mg | Week12 | C22orf46  | protein_coding       | chr22 | 42084943  | 42094140  | + | 5341  | 323.7436 | 0        | 0.376535 | 0.089021 | 4.229707 | 3.11E-05 | 0.047462 | 1 |
| ENSG00000229180.4  | TREATTXTPF-00547659 225mg | Week12 | GS1-124K1 | lincRNA              | chr7  | 65991075  | 66007536  | + | 7092  | 555.8597 | 0        | 0.294762 | 0.069797 | 4.223119 | 3.20E-05 | 0.047462 | 1 |
| ENSG00000152127.4  | TREATTXTPF-00547659 75mg  | Week12 | MGAT5     | protein_coding       | chr2  | 134877554 | 135212192 | + | 8578  | 2830.033 | 0        | 0.274454 | 0.065051 | 4.219061 | 3.25E-05 | 0.047462 | 1 |
| ENSG00000131459.8  | TREATTXTPF-00547659 75mg  | Week12 | GFPT2     | protein_coding       | chr5  | 179727690 | 179780387 | - | 4780  | 22.57127 | 0.076243 | 0.774739 | 0.183656 | 4.21842  | 3.26E-05 | 0.047462 | 1 |
| ENSG00000100099.16 | TREATTXTPF-00547659 225mg | Week12 | HPS4      | protein_coding       | chr22 | 26839389  | 26879803  | - | 10782 | 1249.367 | 0        | 0.348234 | 0.082664 | 4.212666 | 3.34E-05 | 0.047462 | 1 |
| ENSG00000126001.11 | TREATTXTPF-00547659 225mg | Week12 | CEP250    | protein_coding       | chr20 | 34042985  | 34099804  | + | 8990  | 2132.202 | 0        | 0.309885 | 0.07359  | 4.210971 | 3.37E-05 | 0.047462 | 1 |
| ENSG00000130340.10 | TREATTXTPF-00547659 225mg | Week12 | SNX9      | protein_coding       | chr6  | 158244296 | 158366109 | + | 4198  | 967.4862 | 0        | 0.372067 | 0.08844  | 4.207024 | 3.42E-05 | 0.047462 | 1 |
| ENSG00000164080.9  | TREATTXTPF-00547659 225mg | Week12 | RAD54L2   | protein_coding       | chr3  | 51575160  | 51702683  | + | 11924 | 1213.013 | 0        | 0.331398 | 0.078969 | 4.19655  | 3.57E-05 | 0.047462 | 1 |
| ENSG00000186615.6  | TREATTXTPF-00547659 225mg | Week12 | KTN1-AS1  | antisense            | chr14 | 55965996  | 56046828  | - | 3595  | 28.04199 | 0.024309 | 0.66408  | 0.158263 | 4.196044 | 3.58E-05 | 0.047462 | 1 |
| ENSG00000010803.12 | TREATTXTPF-00547659 225mg | Week12 | SCMH1     | protein_coding       | chr1  | 41492872  | 41707826  | - | 4447  | 508.2652 | 0        | 0.371167 | 0.088493 | 4.194319 | 3.61E-05 | 0.047462 | 1 |
| ENSG00000101216.6  | TREATTXTPF-00547659 225mg | Week12 | GMEB2     | protein_coding       | chr20 | 62218955  | 62258394  | - | 4707  | 2039.059 | 0        | 0.20782  | 0.04968  | 4.183178 | 3.78E-05 | 0.047462 | 1 |
| ENSG00000149328.10 | TREATTXTPF-00547659 75mg  | Week12 | GLB1L2    | protein_coding       | chr11 | 134201768 | 134248235 | + | 7280  | 122.5392 | 0.003315 | 0.663937 | 0.158835 | 4.180036 | 3.83E-05 | 0.047462 | 1 |
| ENSG00000261139.1  | TREATTXTPF-00547659 225mg | Week12 | CTD-2517l | processed_transcript | chr8  | 145721763 | 145725663 | - | 3368  | 7.070718 | 0.173481 | 0.650572 | 0.155646 | 4.179818 | 3.83E-05 | 0.047462 | 1 |
| ENSG00000189319.9  | TREATTXTPF-00547659 75mg  | Week12 | FAM53B    | protein_coding       | chr10 | 126307861 | 126432838 | - | 6424  | 6455.244 | 0        | 0.250622 | 0.059972 | 4.178976 | 3.85E-05 | 0.047462 | 1 |
| ENSG00000100150.12 | TREATTXTPF-00547659 225mg | Week12 | DEPDC5    | protein_coding       | chr22 | 32149944  | 32303012  | + | 8587  | 943.3348 | 0        | 0.304452 | 0.072857 | 4.178789 | 3.85E-05 | 0.047462 | 1 |
| ENSG00000134202.6  | TREATTXTPF-00547659 225mg | Week12 | GSTM3     | protein_coding       | chr1  | 110276554 | 110284384 | - | 4837  | 160.5514 | 0.003315 | 0.581345 | 0.1392   | 4.176315 | 3.89E-05 | 0.047462 | 1 |
| ENSG00000243156.3  | TREATTXTPF-00547659 225mg | Week12 | MICAL3    | protein_coding       | chr22 | 18270415  | 18507325  | - | 22361 | 286.505  | 0        | 0.536118 | 0.128404 | 4.175247 | 3.91E-05 | 0.047462 | 1 |
| ENSG00000204580.7  | TREATTXTPF-00547659 225mg | Week12 | DDR1      | protein_coding       | chr6  | 30844198  | 30867933  | + | 9122  | 252.8718 | 0.00221  | 0.507316 | 0.121722 | 4.167839 | 4.03E-05 | 0.047462 | 1 |
| ENSG00000160683.4  | TREATTXTPF-00547659 225mg | Week12 | CXCR5     | protein_coding       | chr11 | 118754475 | 118768508 | + | 4431  | 1337.429 | 0.001105 | 0.510161 | 0.122465 | 4.165781 | 4.06E-05 | 0.047462 | 1 |
| ENSG00000112033.9  | TREATTXTPF-00547659 225mg | Week12 | PPARD     | protein_coding       | chr6  | 35310335  | 35395968  | + | 4458  | 2003.179 | 0        | 0.287526 | 0.069094 | 4.161364 | 4.14E-05 | 0.047462 | 1 |
| ENSG00000066827.11 | TREATTXTPF-00547659 75mg  | Week12 | ZFAT      | protein_coding       | chr8  | 135490031 | 135725292 | - | 8900  | 747.3779 | 0        | 0.217815 | 0.052354 | 4.160386 | 4.15E-05 | 0.047462 | 1 |
| ENSG00000235621.4  | TREATTXTPF-00547659 225mg | Week12 | LINC00494 | lincRNA              | chr20 | 46988693  | 46999372  | + | 4204  | 113.0983 | 0.007735 | 0.693227 | 0.166841 | 4.15501  | 4.25E-05 | 0.047462 | 1 |
| ENSG00000263264.1  | TREATTXTPF-00547659 225mg | Week12 | CTB-133Gt | protein_coding       | chr19 | 7413848   | 7448271   | + | 1558  | 748.2939 | 0        | 0.407154 | 0.098014 | 4.154037 | 4.26E-05 | 0.047462 | 1 |
| ENSG00000124374.8  | TREATTXTPF-00547659 225mg | Week12 | PAIP2B    | protein_coding       | chr2  | 71409869  | 71454213  | - | 6279  | 187.7304 | 0.001105 | 0.522182 | 0.125859 | 4.148936 | 4.35E-05 | 0.047462 | 1 |
| ENSG00000260876.1  | TREATTXTPF-00547659 225mg | Week12 | RP11-345l | lincRNA              | chr16 | 79710005  | 79841819  | + | 2409  | 3.470718 | 0.40442  | 0.624032 | 0.150496 | 4.146505 | 4.40E-05 | 0.047462 | 1 |
| ENSG00000213626.7  | TREATTXTPF-00547659 225mg | Week12 | LBH       | protein_coding       | chr2  | 30454397  | 30546596  | + | 4535  | 3240.101 | 0        | 0.474316 | 0.114495 | 4.142665 | 4.47E-05 | 0.047462 | 1 |
| ENSG00000198198.9  | TREATTXTPF-00547659 225mg | Week12 | SZT2      | protein_coding       | chr1  | 43855553  | 43918321  | + | 17331 | 3147.648 | 0        | 0.257011 | 0.062112 | 4.13787  | 4.56E-05 | 0.047462 | 1 |
| ENSG00000148843.9  | TREATTXTPF-00547659 225mg | Week12 | PDCD11    | protein_coding       | chr10 | 105156405 | 105206049 | + | 7382  | 1536.814 | 0        | 0.33203  | 0.080266 | 4.136627 | 4.58E-05 | 0.047462 | 1 |
| ENSG00000198873.10 | TREATTXTPF-00547659 225mg | Week12 | GSK5      | protein_coding       | chr10 | 120967101 | 121215131 | + | 2949  | 1612.761 | 0        | 0.211702 | 0.051216 | 4.133523 | 4.64E-05 | 0.047462 | 1 |
| ENSG00000116580.14 | TREATTXTPF-00547659 225mg | Week12 | GON4L     | protein_coding       | chr1  | 155719508 | 155829191 | - | 11912 | 2366.067 | 0        | 0.273841 | 0.066307 | 4.129862 | 4.71E-05 | 0.047462 | 1 |
| ENSG00000125485.13 | TREATTXTPF-00547659 225mg | Week12 | DDX31     | protein_coding       | chr9  | 135468384 | 135545788 | - | 6631  | 411.4862 | 0        | 0.40953  | 0.09928  | 4.124987 | 4.81E-05 | 0.047462 | 1 |
| ENSG00000103528.12 | TREATTXTPF-00547659 225mg | Week12 | SYT17     | protein_coding       | chr16 | 19179293  | 19279652  | + | 7534  | 65.73702 | 0.00884  | 0.605268 | 0.146764 | 4.124087 | 4.82E-05 | 0.047462 | 1 |
| ENSG00000007516.9  | TREATTXTPF-00547659 75mg  | Week12 | BAIAP3    | protein_coding       | chr16 | 1383602   | 1399439   | + | 6143  | 752.8044 | 0        | 0.443089 | 0.1077   | 4.114087 | 5.03E-05 | 0.047462 | 1 |
| ENSG00000163746.7  | TREATTXTPF-00547659 225mg | Week12 | PLSCR2    | protein_coding       | chr3  | 146109208 | 146213778 | - | 2544  | 6.226519 | 0.233149 | -0.67586 | 0.16436  | -4.11205 | 5.07E-05 | 0.047462 | 1 |
| ENSG00000124228.10 | TREATTXTPF-00547659 225mg | Week12 | DDX27     | protein_coding       | chr20 | 47835884  | 47860614  | + | 5405  | 2488.224 | 0        | 0.270424 | 0.065772 | 4.111514 | 5.08E-05 | 0.047462 | 1 |
| ENSG00000066117.10 | TREATTXTPF-00547659 225mg | Week12 | SMARCD1   | protein_coding       | chr12 | 50478755  | 50494495  | + | 5136  | 2776.624 | 0        | 0.248131 | 0.060393 | 4.108624 | 5.14E-05 | 0.047462 | 1 |
| ENSG00000151320.6  | TREATTXTPF-00547659 225mg | Week12 | AKAP6     | protein_coding       | chr14 | 32798479  | 33300567  | + | 13428 | 35.40442 | 0.032044 | 0.773449 | 0.188738 | 4.098001 | 5.37E-05 | 0.047462 | 1 |
| ENSG00000152102.13 | TREATTXTPF-00547659 225mg | Week12 | FAM168B   | protein_coding       | chr2  | 131805449 | 131851033 | - | 5435  | 4025.178 | 0        | 0.257735 | 0.062934 | 4.095299 | 5.43E-05 | 0.047462 | 1 |
| ENSG00000063978.11 | TREATTXTPF-00547659 225mg | Week12 | RNF4      | protein_coding       | chr4  | 2463947   | 2627047   | + | 7276  | 5212.419 | 0        | 0.231656 | 0.056575 | 4.094694 | 5.44E-05 | 0.047462 | 1 |
| ENSG00000146707.10 | TREATTXTPF-00547659 75mg  | Week12 | POMZP3    | protein_coding       | chr7  | 76239303  | 76256578  | - | 1861  | 339.5635 | 0        | 0.268949 | 0.065692 | 4.094118 | 5.45E-05 | 0.047462 | 1 |
| ENSG00000135372.4  | TREATTXTPF-00547659 225mg | Week12 | NAT10     | protein_coding       | chr11 | 34127149  | 34169217  | + | 5242  | 1999.598 | 0        | 0.347465 | 0.084901 | 4.092608 | 5.49E-05 | 0.047462 | 1 |
| ENSG00000130723.13 | TREATTXTPF-00547659 225mg | Week12 | PRRC2B    | protein_coding       | chr9  | 134269480 | 134375584 | + | 12293 | 8435.506 | 0        | 0.286628 | 0.070044 | 4.09209  | 5.50E-05 | 0.047462 | 1 |
| ENSG00000171456.12 | TREATTXTPF-00547659 225mg | Week12 | ASXL1     | protein_coding       | chr20 | 30946155  | 31027122  | + | 9417  | 3150.523 | 0        | 0.312556 | 0.076402 | 4.09094  | 5.53E-05 | 0.047462 | 1 |
| ENSG00000151136.10 | TREATTXTPF-00547659 225mg | Week12 | BTBD11    | protein_coding       | chr12 | 107712190 | 108053419 | + | 7924  | 561.7801 | 0        | 0.395105 | 0.096613 | 4.089578 | 5.56E-05 | 0.047462 | 1 |
| ENSG00000107742.8  | TREATTXTPF-00547659 225mg | Week12 | SPOCK2    | protein_coding       | chr10 | 73818793  | 73848790  | - | 6572  | 17836.64 | 0        | 0.389968 | 0.095428 | 4.086525 | 5.63E-05 | 0.047462 | 1 |
| ENSG00000087258.9  | TREATTXTPF-00547659 75mg  | Week12 | GNAO1     | protein_coding       | chr16 | 56225302  | 56391356  | + | 9813  | 196.5094 | 0        | 0.438584 | 0.107436 | 4.08227  | 5.72E-05 | 0.047462 | 1 |
| ENSG00000100068.7  | TREATTXTPF-00547659 225mg | Week12 | LRP5L     | protein_coding       | chr22 | 25747385  | 25801344  | - | 4555  | 394.6243 | 0.001105 | 0.42221  | 0.103441 | 4.081643 | 5.74E-05 | 0.047462 | 1 |
| ENSG00000104880.13 | TREATTXTPF-00547659 225mg | Week12 | ARHGEF18  | protein_coding       | chr19 | 7459999   | 7537363   | + | 6235  | 5615.747 | 0        | 0.237148 | 0.058174 | 4.076506 | 5.86E-05 | 0.047462 | 1 |
| ENSG00000157570.7  | TREATTXTPF-00547659 225mg | Week12 | TSPAN18   | protein_coding       | chr11 | 44748015  | 44953972  | + | 5871  | 1306.876 | 0        | 0.405883 | 0.099664 | 4.072524 | 5.96E-05 | 0.047462 | 1 |
| ENSG00000188687.11 | TREATTXTPF-00547659 225mg | Week12 | SLC4A5    | protein_coding       | chr2  | 74443369  | 74570541  | - | 8009  | 101.4077 | 0.003315 | 0.53315  | 0.130918 | 4.072386 | 5.96E-05 | 0.047462 | 1 |

|                    |                           |        |           |                |       |           |             |       |          |          |          |          |          |          |          |   |
|--------------------|---------------------------|--------|-----------|----------------|-------|-----------|-------------|-------|----------|----------|----------|----------|----------|----------|----------|---|
| ENSG00000147457.9  | TREATTXTPF-00547659 225mg | Week12 | CHMP7     | protein_coding | chr8  | 23101150  | 23119512 +  | 4532  | 4938.083 | 0        | 0.347924 | 0.085451 | 4.071621 | 5.98E-05 | 0.047462 | 1 |
| ENSG00000004139.9  | TREATTXTPF-00547659 225mg | Week12 | SARM1     | protein_coding | chr17 | 26691378  | 26728065 +  | 8132  | 1008.54  | 0        | 0.375286 | 0.092217 | 4.06961  | 6.03E-05 | 0.047462 | 1 |
| ENSG00000143772.5  | TREATTXTPF-00547659 225mg | Week12 | ITPKB     | protein_coding | chr1  | 226819391 | 226927024 - | 7036  | 7510.972 | 0        | 0.250369 | 0.061542 | 4.068254 | 6.06E-05 | 0.047462 | 1 |
| ENSG00000141576.10 | TREATTXTPF-00547659 225mg | Week12 | RNF157    | protein_coding | chr17 | 74138534  | 74236454 -  | 7802  | 1489.094 | 0        | 0.429841 | 0.105663 | 4.068041 | 6.07E-05 | 0.047462 | 1 |
| ENSG00000086102.14 | TREATTXTPF-00547659 225mg | Week12 | NFX1      | protein_coding | chr9  | 33290509  | 33371155 +  | 7147  | 1978.85  | 0        | 0.333294 | 0.081961 | 4.066473 | 6.10E-05 | 0.047462 | 1 |
| ENSG00000069966.14 | TREATTXTPF-00547659 225mg | Week12 | GNB5      | protein_coding | chr15 | 52413117  | 52483566 -  | 7487  | 654.2873 | 0        | 0.332268 | 0.081735 | 4.065174 | 6.14E-05 | 0.047462 | 1 |
| ENSG00000188522.10 | TREATTXTPF-00547659 225mg | Week12 | FAM83G    | protein_coding | chr17 | 18872102  | 18908117 -  | 7883  | 374.6265 | 0        | 0.42747  | 0.105191 | 4.063747 | 6.17E-05 | 0.047462 | 1 |
| ENSG00000070366.9  | TREATTXTPF-00547659 225mg | Week12 | SMG6      | protein_coding | chr17 | 1963133   | 2207065 -   | 11060 | 1576.991 | 0        | 0.28161  | 0.069392 | 4.058217 | 6.31E-05 | 0.047462 | 1 |
| ENSG00000131196.13 | TREATTXTPF-00547659 225mg | Week12 | NFATC1    | protein_coding | chr18 | 77155856  | 77289325 +  | 7008  | 1862.165 | 0        | 0.297307 | 0.073311 | 4.055426 | 6.38E-05 | 0.047462 | 1 |
| ENSG00000154309.7  | TREATTXTPF-00547659 225mg | Week12 | DISP1     | protein_coding | chr1  | 222988406 | 223179337 + | 5549  | 136.3105 | 0        | 0.373779 | 0.092187 | 4.054588 | 6.41E-05 | 0.047462 | 1 |
| ENSG00000179598.5  | TREATTXTPF-00547659 225mg | Week12 | PLD6      | protein_coding | chr17 | 17104309  | 17109629 -  | 2560  | 217.5282 | 0        | 0.38384  | 0.094687 | 4.053786 | 6.43E-05 | 0.047462 | 1 |
| ENSG00000170486.6  | TREATTXTPF-00547659 225mg | Week12 | KRT72     | protein_coding | chr12 | 52979373  | 52995322 -  | 2154  | 240.8177 | 0.00442  | 0.642948 | 0.158638 | 4.05292  | 6.45E-05 | 0.047462 | 1 |
| ENSG00000125354.18 | TREATTXTPF-00547659 225mg | Week12 | 06-Sep    | protein_coding | chrX  | 118749687 | 118827333 - | 6553  | 10734.69 | 0        | 0.311122 | 0.076802 | 4.050953 | 6.50E-05 | 0.047462 | 1 |
| ENSG00000157014.6  | TREATTXTPF-00547659 225mg | Week12 | TATDN2    | protein_coding | chr3  | 10289707  | 10322902 +  | 5572  | 1903.309 | 0        | 0.225087 | 0.05562  | 4.046838 | 6.61E-05 | 0.047462 | 1 |
| ENSG00000176533.8  | TREATTXTPF-00547659 225mg | Week12 | GN7D      | protein_coding | chr19 | 2511217   | 2702707 -   | 4561  | 1105.566 | 0        | 0.322792 | 0.079819 | 4.044068 | 6.69E-05 | 0.047462 | 1 |
| ENSG00000197816.9  | TREATTXTPF-00547659 225mg | Week12 | CCDC180   | protein_coding | chr9  | 100000765 | 100140806 + | 16070 | 86.27956 | 0.007735 | 0.579795 | 0.143375 | 4.04391  | 6.69E-05 | 0.047462 | 1 |
| ENSG00000204514.5  | TREATTXTPF-00547659 225mg | Week12 | ZNF814    | protein_coding | chr19 | 58360099  | 58400442 -  | 12600 | 326.8508 | 0.001105 | 0.38578  | 0.095398 | 4.043895 | 6.69E-05 | 0.047462 | 1 |
| ENSG00000211810.3  | TREATTXTPF-00547659 225mg | Week12 | TRAV29DV  | TR_V_gene      | chr14 | 22631134  | 22631766 +  | 469   | 176.6166 | 0.001105 | 0.55626  | 0.13758  | 4.043174 | 6.71E-05 | 0.047462 | 1 |
| ENSG0000020932.7   | TREATTXTPF-00547659 225mg | Week12 | RPAP1     | protein_coding | chr15 | 41809374  | 41836467 -  | 7046  | 967.3116 | 0        | 0.332748 | 0.082308 | 4.042692 | 6.72E-05 | 0.047462 | 1 |
| ENSG0000010319.2   | TREATTXTPF-00547659 75mg  | Week12 | SEMA3G    | protein_coding | chr3  | 52467069  | 52479101 -  | 5011  | 38.3989  | 0.01326  | 0.60805  | 0.150438 | 4.04185  | 6.75E-05 | 0.047462 | 1 |
| ENSG00000138795.5  | TREATTXTPF-00547659 225mg | Week12 | LEF1      | protein_coding | chr4  | 108968701 | 109090112 - | 5361  | 6385.203 | 0        | 0.489482 | 0.121108 | 4.04168  | 6.75E-05 | 0.047462 | 1 |
| ENSG00000251323.2  | TREATTXTPF-00547659 225mg | Week12 | RP11-452H | lincRNA        | chr11 | 78135028  | 78140882 -  | 1642  | 11.44199 | 0.114917 | 0.74335  | 0.183936 | 4.04134  | 6.76E-05 | 0.047462 | 1 |
| ENSG00000197381.11 | TREATTXTPF-00547659 225mg | Week12 | ADARB1    | protein_coding | chr21 | 46493768  | 46646478 +  | 10015 | 1167.917 | 0        | 0.391818 | 0.097017 | 4.038672 | 6.83E-05 | 0.047462 | 1 |
| ENSG00000144218.14 | TREATTXTPF-00547659 225mg | Week12 | AFF3      | protein_coding | chr2  | 100162323 | 100759201 - | 12295 | 569.9735 | 0.00221  | 0.634174 | 0.157085 | 4.037135 | 6.88E-05 | 0.047462 | 1 |
| ENSG00000161010.10 | TREATTXTPF-00547659 225mg | Week12 | C5orf45   | protein_coding | chr5  | 179261436 | 179289173 - | 9193  | 1136.442 | 0        | 0.457659 | 0.113373 | 4.036769 | 6.89E-05 | 0.047462 | 1 |
| ENSG00000170004.12 | TREATTXTPF-00547659 225mg | Week12 | CHD3      | protein_coding | chr17 | 7788124   | 7816078 +   | 9758  | 10621.38 | 0        | 0.293243 | 0.07265  | 4.036368 | 6.90E-05 | 0.047462 | 1 |
| ENSG00000100154.10 | TREATTXTPF-00547659 225mg | Week12 | TTC28     | protein_coding | chr22 | 28374004  | 29075853 +  | 12641 | 62.61547 | 0.003315 | 0.495483 | 0.122756 | 4.036334 | 6.90E-05 | 0.047462 | 1 |
| ENSG00000006555.6  | TREATTXTPF-00547659 75mg  | Week12 | TTC22     | protein_coding | chr1  | 55245385  | 55266940 -  | 6055  | 669.8641 | 0        | 0.308802 | 0.076545 | 4.034271 | 6.96E-05 | 0.047462 | 1 |
| ENSG00000121671.7  | TREATTXTPF-00547659 225mg | Week12 | CRY2      | protein_coding | chr11 | 45868669  | 45904798 +  | 6199  | 1616.671 | 0        | 0.29401  | 0.072975 | 4.028899 | 7.11E-05 | 0.047462 | 1 |
| ENSG00000089154.6  | TREATTXTPF-00547659 225mg | Week12 | GCN1L1    | protein_coding | chr12 | 120565007 | 120632513 - | 9654  | 3591.844 | 0        | 0.334245 | 0.08298  | 4.028008 | 7.13E-05 | 0.047462 | 1 |
| ENSG00000241258.2  | TREATTXTPF-00547659 225mg | Week12 | RCRP      | protein_coding | chr7  | 65579591  | 65619555 +  | 3548  | 1218.303 | 0        | 0.239981 | 0.059607 | 4.02602  | 7.19E-05 | 0.047462 | 1 |
| ENSG00000103343.8  | TREATTXTPF-00547659 225mg | Week12 | ZNF174    | protein_coding | chr16 | 3451235   | 3459370 +   | 2876  | 491.3448 | 0        | 0.230822 | 0.057342 | 4.025372 | 7.21E-05 | 0.047462 | 1 |
| ENSG00000143319.12 | TREATTXTPF-00547659 225mg | Week12 | ISG20L2   | protein_coding | chr1  | 156691683 | 156698591 - | 5262  | 2240.42  | 0        | 0.155678 | 0.038762 | 4.016216 | 7.48E-05 | 0.047462 | 1 |
| ENSG00000168014.12 | TREATTXTPF-00547659 225mg | Week12 | C2CD3     | protein_coding | chr11 | 73723763  | 73882255 -  | 12567 | 1386.856 | 0        | 0.258525 | 0.064385 | 4.015276 | 7.51E-05 | 0.047462 | 1 |
| ENSG00000181090.13 | TREATTXTPF-00547659 225mg | Week12 | EHMT1     | protein_coding | chr9  | 140513444 | 140764468 + | 15257 | 2967.754 | 0        | 0.246649 | 0.061459 | 4.013208 | 7.57E-05 | 0.047462 | 1 |
| ENSG00000080603.12 | TREATTXTPF-00547659 225mg | Week12 | SRCAP     | protein_coding | chr16 | 30709530  | 30755602 +  | 12746 | 7665.335 | 0        | 0.281051 | 0.070032 | 4.01316  | 7.57E-05 | 0.047462 | 1 |
| ENSG00000215041.5  | TREATTXTPF-00547659 225mg | Week12 | NEURL4    | protein_coding | chr17 | 7218947   | 7232712 -   | 6170  | 841.3912 | 0        | 0.286697 | 0.07144  | 4.013145 | 7.57E-05 | 0.047462 | 1 |
| ENSG00000142512.10 | TREATTXTPF-00547659 225mg | Week12 | SIGLEC10  | protein_coding | chr19 | 51913275  | 51921057 -  | 3667  | 7939.117 | 0        | 0.334026 | 0.083234 | 4.013089 | 7.58E-05 | 0.047462 | 1 |
| ENSG00000124181.10 | TREATTXTPF-00547659 225mg | Week12 | PLCG1     | protein_coding | chr20 | 39765600  | 39811629 +  | 7164  | 4754.527 | 0        | 0.417834 | 0.104148 | 4.011918 | 7.61E-05 | 0.047462 | 1 |
| ENSG00000134369.11 | TREATTXTPF-00547659 225mg | Week12 | NAV1      | protein_coding | chr1  | 201592411 | 201796102 + | 22056 | 249.6011 | 0.003315 | 0.474073 | 0.118187 | 4.011201 | 7.63E-05 | 0.047462 | 1 |
| ENSG00000135632.7  | TREATTXTPF-00547659 225mg | Week12 | SMYD5     | protein_coding | chr2  | 73441350  | 73454365 +  | 3380  | 770.9138 | 0        | 0.379176 | 0.094537 | 4.010887 | 7.64E-05 | 0.047462 | 1 |
| ENSG00000183495.9  | TREATTXTPF-00547659 225mg | Week12 | EP400     | protein_coding | chr12 | 132434508 | 132565005 + | 12379 | 2504.66  | 0        | 0.345157 | 0.086066 | 4.010368 | 7.66E-05 | 0.047462 | 1 |
| ENSG00000203832.6  | TREATTXTPF-00547659 225mg | Week12 | NBPF20    | protein_coding | chr1  | 148250249 | 148347506 - | 16242 | 168.811  | 0.003315 | 0.389824 | 0.097235 | 4.009082 | 7.70E-05 | 0.047462 | 1 |
| ENSG00000038532.10 | TREATTXTPF-00547659 225mg | Week12 | CLEC16A   | protein_coding | chr16 | 11038345  | 11276046 +  | 11944 | 1546.623 | 0        | 0.217504 | 0.054254 | 4.008984 | 7.70E-05 | 0.047462 | 1 |
| ENSG00000146285.9  | TREATTXTPF-00547659 225mg | Week12 | SCML4     | protein_coding | chr6  | 108025308 | 108145521 - | 7116  | 1768.394 | 0        | 0.297123 | 0.074123 | 4.008519 | 7.72E-05 | 0.047462 | 1 |
| ENSG00000006432.11 | TREATTXTPF-00547659 225mg | Week12 | MAP3K9    | protein_coding | chr14 | 71189243  | 71276251 -  | 12386 | 233.9138 | 0        | 0.42436  | 0.105903 | 4.007055 | 7.76E-05 | 0.047462 | 1 |
| ENSG00000146834.9  | TREATTXTPF-00547659 225mg | Week12 | MEPCE     | protein_coding | chr7  | 100026413 | 100031741 + | 3412  | 2940.169 | 0        | 0.212272 | 0.053001 | 4.005037 | 7.82E-05 | 0.047462 | 1 |
| ENSG00000179532.8  | TREATTXTPF-00547659 225mg | Week12 | DNHD1     | protein_coding | chr11 | 6518490   | 6614988 +   | 19629 | 721.3978 | 0        | 0.42704  | 0.106641 | 4.004473 | 7.84E-05 | 0.047462 | 1 |
| ENSG00000143515.12 | TREATTXTPF-00547659 225mg | Week12 | ATP8B2    | protein_coding | chr1  | 154298029 | 154323783 + | 7572  | 5352.378 | 0        | 0.452798 | 0.113105 | 4.003348 | 7.88E-05 | 0.047462 | 1 |
| ENSG00000265148.1  | TREATTXTPF-00547659 75mg  | Week12 | BZRAP1-A  | antisense      | chr17 | 56402811  | 56493127 +  | 3601  | 1701.136 | 0        | 0.304486 | 0.076078 | 4.002278 | 7.91E-05 | 0.047462 | 1 |
| ENSG00000133460.15 | TREATTXTPF-00547659 225mg | Week12 | SLC2A11   | protein_coding | chr22 | 24198890  | 24228496 +  | 8864  | 252.0287 | 0        | 0.40991  | 0.102453 | 4.000946 | 7.95E-05 | 0.047462 | 1 |
| ENSG00000166685.7  | TREATTXTPF-00547659 225mg | Week12 | COG1      | protein_coding | chr17 | 71189129  | 71204646 +  | 5061  | 1489.896 | 0        | 0.25257  | 0.063143 | 3.999968 | 7.99E-05 | 0.047462 | 1 |
| ENSG00000133985.2  | TREATTXTPF-00547659 225mg | Week12 | TTC9      | protein_coding | chr14 | 71108504  | 71142077 +  | 5217  | 1291.958 | 0        | 0.327795 | 0.081992 | 3.997864 | 8.05E-05 | 0.047462 | 1 |

|                    |                           |        |           |                |       |           |             |        |          |          |          |          |          |          |          |   |
|--------------------|---------------------------|--------|-----------|----------------|-------|-----------|-------------|--------|----------|----------|----------|----------|----------|----------|----------|---|
| ENSG00000198873.10 | TREATTXTPF-00547659 75mg  | Week12 | GRK5      | protein_coding | chr10 | 120967101 | 121215131 + | 2949   | 1612.761 | 0        | 0.199088 | 0.049822 | 3.996014 | 8.11E-05 | 0.047462 | 1 |
| ENSG00000242899.1  | TREATTXTPF-00547659 225mg | Week12 | RP11-250E | pseudogene     | chr3  | 131962372 | 131963109 - | 738    | 2.662983 | 0.564641 | 0.566757 | 0.141841 | 3.995731 | 8.12E-05 | 0.047462 | 1 |
| ENSG00000181666.13 | TREATTXTPF-00547659 225mg | Week12 | HKR1      | protein_coding | chr19 | 37803739  | 37860267 +  | 7203   | 1242.936 | 0        | 0.340209 | 0.085193 | 3.993396 | 8.20E-05 | 0.047462 | 1 |
| ENSG00000107959.11 | TREATTXTPF-00547659 225mg | Week12 | PITRM1    | protein_coding | chr10 | 3179920   | 3215003 -   | 6949   | 2014.158 | 0        | 0.297055 | 0.074408 | 3.992223 | 8.24E-05 | 0.047462 | 1 |
| ENSG00000169129.10 | TREATTXTPF-00547659 75mg  | Week12 | AFAP1L2   | protein_coding | chr10 | 116054583 | 116164515 - | 5948   | 147.5392 | 0        | 0.381618 | 0.095593 | 3.992096 | 8.24E-05 | 0.047462 | 1 |
| ENSG00000137802.9  | TREATTXTPF-00547659 225mg | Week12 | MAPKBP1   | protein_coding | chr15 | 42066632  | 42120053 +  | 10357  | 796.2862 | 0        | 0.281152 | 0.0705   | 3.987996 | 8.38E-05 | 0.047462 | 1 |
| ENSG00000184708.13 | TREATTXTPF-00547659 225mg | Week12 | EIF4ENIF1 | protein_coding | chr22 | 31832963  | 31892094 -  | 6090   | 1224.304 | 0        | 0.25307  | 0.063486 | 3.986227 | 8.44E-05 | 0.047462 | 1 |
| ENSG00000196821.5  | TREATTXTPF-00547659 225mg | Week12 | C6orf106  | protein_coding | chr6  | 34555065  | 34664636 -  | 4551   | 5815.159 | 0        | 0.199729 | 0.050124 | 3.984688 | 8.49E-05 | 0.047462 | 1 |
| ENSG00000149474.9  | TREATTXTPF-00547659 225mg | Week12 | CSRP2BP   | protein_coding | chr20 | 18118762  | 18169031 +  | 4251   | 661.263  | 0        | 0.344358 | 0.086451 | 3.983274 | 8.54E-05 | 0.047462 | 1 |
| ENSG00000145041.11 | TREATTXTPF-00547659 225mg | Week12 | VPRBP     | protein_coding | chr3  | 51433298  | 51534010 -  | 6682   | 1385.514 | 0        | 0.364126 | 0.091416 | 3.983175 | 8.54E-05 | 0.047462 | 1 |
| ENSG00000117597.13 | TREATTXTPF-00547659 225mg | Week12 | DIEXF     | protein_coding | chr1  | 210001352 | 210030910 + | 10376  | 806.5459 | 0        | 0.402678 | 0.101126 | 3.981949 | 8.58E-05 | 0.047462 | 1 |
| ENSG00000133056.9  | TREATTXTPF-00547659 225mg | Week12 | PIK3C2B   | protein_coding | chr1  | 204391756 | 204463852 - | 9414   | 978.0862 | 0        | 0.439724 | 0.110445 | 3.98139  | 8.60E-05 | 0.047462 | 1 |
| ENSG00000164649.15 | TREATTXTPF-00547659 225mg | Week12 | CDCA7L    | protein_coding | chr7  | 21940518  | 21985702 -  | 4074   | 789.0541 | 0        | 0.365536 | 0.091826 | 3.980733 | 8.62E-05 | 0.047462 | 1 |
| ENSG00000135253.5  | TREATTXTPF-00547659 225mg | Week12 | ANGE1L    | protein_coding | chr14 | 77253588  | 77292589 -  | 5347   | 781.2674 | 0        | 0.376563 | 0.094615 | 3.97993  | 8.65E-05 | 0.047462 | 1 |
| ENSG00000178764.6  | TREATTXTPF-00547659 225mg | Week12 | ZHX2      | protein_coding | chr8  | 123793633 | 123986750 + | 4714   | 2324.836 | 0        | 0.22784  | 0.057252 | 3.979588 | 8.66E-05 | 0.047462 | 1 |
| ENSG00000108292.12 | TREATTXTPF-00547659 225mg | Week12 | MLLT6     | protein_coding | chr17 | 36861795  | 36886056 +  | 13315  | 11014.77 | 0        | 0.309554 | 0.077811 | 3.978294 | 8.71E-05 | 0.047462 | 1 |
| ENSG00000105738.6  | TREATTXTPF-00547659 225mg | Week12 | SIPA1L3   | protein_coding | chr19 | 38397868  | 38699012 +  | 10335  | 1267.587 | 0        | 0.382066 | 0.096281 | 3.968227 | 9.07E-05 | 0.048851 | 1 |
| ENSG00000133985.2  | TREATTXTPF-00547659 75mg  | Week12 | TTC9      | protein_coding | chr14 | 71108504  | 71142077 +  | 5217   | 1291.958 | 0        | 0.317266 | 0.079963 | 3.967674 | 9.09E-05 | 0.048851 | 1 |
| ENSG00000129038.11 | TREATTXTPF-00547659 75mg  | Week12 | LOXL1     | protein_coding | chr15 | 74218330  | 74244478 +  | 3637   | 70.91492 | 0.003315 | -0.4615  | 0.11634  | -3.96678 | 9.12E-05 | 0.048851 | 1 |
| ENSG00000055163.14 | TREATTXTPF-00547659 225mg | Week12 | CYFIP2    | protein_coding | chr5  | 156693089 | 156822606 + | 10509  | 17216.78 | 0        | 0.213672 | 0.053933 | 3.961839 | 9.30E-05 | 0.049287 | 1 |
| ENSG00000181135.11 | TREATTXTPF-00547659 225mg | Week12 | ZNF707    | protein_coding | chr8  | 144766622 | 144796068 + | 6328   | 583.6265 | 0        | 0.251489 | 0.063496 | 3.960701 | 9.34E-05 | 0.049287 | 1 |
| ENSG00000132604.6  | TREATTXTPF-00547659 225mg | Week12 | TERF2     | protein_coding | chr16 | 69389464  | 69442474 -  | 5621   | 1552.144 | 0        | 0.22986  | 0.058041 | 3.960324 | 9.36E-05 | 0.049287 | 1 |
| ENSG00000136573.8  | TREATTXTPF-00547659 225mg | Week12 | BLK       | protein_coding | chr8  | 11351510  | 11422113 +  | 4803   | 1461.55  | 0        | 0.427878 | 0.108138 | 3.956789 | 9.49E-05 | 0.049709 | 1 |
| ENSG00000115970.14 | TREATTXTPF-00547659 225mg | Week12 | THADA     | protein_coding | chr2  | 43393800  | 43823185 -  | 14331  | 1340.463 | 0        | 0.241097 | 0.060983 | 3.953524 | 9.61E-05 | 0.050078 | 1 |
| ENSG00000160208.11 | TREATTXTPF-00547659 225mg | Week12 | RRP1B     | protein_coding | chr21 | 45079429  | 45115958 +  | 5760   | 1936.548 | 0        | 0.38246  | 0.096834 | 3.94963  | 9.76E-05 | 0.050078 | 1 |
| ENSG00000044090.4  | TREATTXTPF-00547659 225mg | Week12 | CUL7      | protein_coding | chr6  | 43005355  | 43021683 -  | 5628   | 692.3989 | 0        | 0.263179 | 0.066655 | 3.948377 | 9.81E-05 | 0.050078 | 1 |
| ENSG00000269343.2  | TREATTXTPF-00547659 225mg | Week12 | ZNF587B   | protein_coding | chr19 | 58331099  | 58370018 +  | 4595   | 589.6541 | 0        | 0.302869 | 0.076748 | 3.946258 | 9.89E-05 | 0.050078 | 1 |
| ENSG00000038358.10 | TREATTXTPF-00547659 225mg | Week12 | EDC4      | protein_coding | chr16 | 67906926  | 67918406 +  | 6173   | 2074.888 | 0        | 0.290749 | 0.073727 | 3.943586 | 1.00E-04 | 0.050078 | 1 |
| ENSG0000010165.15  | TREATTXTPF-00547659 225mg | Week12 | METT1L3   | protein_coding | chr1  | 171750788 | 171783163 + | 3843   | 1315.832 | 0        | 0.262461 | 0.066559 | 3.943315 | 0.0001   | 0.050078 | 1 |
| ENSG00000083838.11 | TREATTXTPF-00547659 225mg | Week12 | ZNF446    | protein_coding | chr19 | 58985384  | 58992597 +  | 4923   | 586.6939 | 0        | 0.26084  | 0.066152 | 3.943045 | 0.0001   | 0.050078 | 1 |
| ENSG00000094916.9  | TREATTXTPF-00547659 225mg | Week12 | CBX5      | protein_coding | chr12 | 54624724  | 54673886 -  | 12508  | 2017.904 | 0        | 0.382013 | 0.096948 | 3.940381 | 0.000101 | 0.050078 | 1 |
| ENSG00000155657.19 | TREATTXTPF-00547659 225mg | Week12 | TTN       | protein_coding | chr2  | 179390716 | 179695529 - | 118327 | 265.3149 | 0        | 0.522087 | 0.132507 | 3.940067 | 0.000101 | 0.050078 | 1 |
| ENSG00000184574.5  | TREATTXTPF-00547659 75mg  | Week12 | LPAR5     | protein_coding | chr12 | 6728001   | 6745613 -   | 3258   | 779.8851 | 0        | 0.334797 | 0.084989 | 3.939281 | 0.000102 | 0.050078 | 1 |
| ENSG00000264198.1  | TREATTXTPF-00547659 75mg  | Week12 | RP11-94L1 | lincRNA        | chr17 | 37913974  | 37920089 -  | 6116   | 5796.403 | 0        | 0.369958 | 0.093941 | 3.938181 | 0.000102 | 0.050078 | 1 |
| ENSG00000154978.8  | TREATTXTPF-00547659 225mg | Week12 | VOPP1     | protein_coding | chr7  | 55503749  | 55640681 -  | 5361   | 3899.56  | 0        | 0.180037 | 0.045734 | 3.93657  | 0.000103 | 0.050078 | 1 |
| ENSG00000122515.10 | TREATTXTPF-00547659 225mg | Week12 | ZMIZ2     | protein_coding | chr7  | 44788180  | 44809477 +  | 7323   | 3754.042 | 0        | 0.261687 | 0.066477 | 3.936495 | 0.000103 | 0.050078 | 1 |
| ENSG00000165271.12 | TREATTXTPF-00547659 225mg | Week12 | NOL6      | protein_coding | chr9  | 33461439  | 33473928 -  | 5930   | 1600.19  | 0        | 0.326163 | 0.082863 | 3.936147 | 0.000103 | 0.050078 | 1 |
| ENSG00000134909.14 | TREATTXTPF-00547659 225mg | Week12 | ARHGAP3   | protein_coding | chr11 | 128834955 | 129149219 - | 12841  | 203.2199 | 0.001105 | 0.521337 | 0.132611 | 3.931342 | 0.000105 | 0.050779 | 1 |
| ENSG00000169057.15 | TREATTXTPF-00547659 225mg | Week12 | MECP2     | protein_coding | chrX  | 153287024 | 153363212 - | 12556  | 5119.741 | 0        | 0.184004 | 0.04689  | 3.924202 | 0.000108 | 0.051763 | 1 |
| ENSG00000110497.10 | TREATTXTPF-00547659 225mg | Week12 | AMBRA1    | protein_coding | chr11 | 46417964  | 46615675 -  | 7673   | 1597.281 | 0        | 0.248212 | 0.063265 | 3.923394 | 0.000108 | 0.051763 | 1 |
| ENSG00000180884.9  | TREATTXTPF-00547659 225mg | Week12 | ZNF792    | protein_coding | chr19 | 35447258  | 35454953 -  | 4234   | 429.4442 | 0.001105 | 0.400751 | 0.102299 | 3.91744  | 0.000111 | 0.051763 | 1 |
| ENSG00000177570.9  | TREATTXTPF-00547659 225mg | Week12 | SAMD12    | protein_coding | chr8  | 119201698 | 119634234 - | 10756  | 74.24972 | 0.007735 | 0.621098 | 0.158577 | 3.916699 | 0.000111 | 0.051763 | 1 |
| ENSG00000184574.5  | TREATTXTPF-00547659 225mg | Week12 | LPAR5     | protein_coding | chr12 | 6728001   | 6745613 -   | 3258   | 779.8851 | 0        | 0.340183 | 0.086902 | 3.914547 | 0.000112 | 0.051763 | 1 |
| ENSG00000084774.9  | TREATTXTPF-00547659 225mg | Week12 | CAD       | protein_coding | chr2  | 27440258  | 27466811 +  | 8422   | 1472.698 | 0        | 0.334587 | 0.085523 | 3.912268 | 0.000113 | 0.051763 | 1 |
| ENSG00000139651.9  | TREATTXTPF-00547659 225mg | Week12 | ZNF740    | protein_coding | chr12 | 53574484  | 53584596 +  | 4734   | 2322.941 | 0        | 0.249478 | 0.063776 | 3.911784 | 0.000113 | 0.051763 | 1 |
| ENSG00000185989.9  | TREATTXTPF-00547659 225mg | Week12 | RASA3     | protein_coding | chr13 | 114747194 | 114898086 - | 4352   | 7925.596 | 0        | 0.335788 | 0.085866 | 3.910603 | 0.000114 | 0.051763 | 1 |
| ENSG00000116353.11 | TREATTXTPF-00547659 225mg | Week12 | FUCR      | protein_coding | chr1  | 29519385  | 29557454 -  | 3922   | 233.4011 | 0        | 0.329864 | 0.084408 | 3.907957 | 0.000115 | 0.051763 | 1 |
| ENSG00000089280.14 | TREATTXTPF-00547659 225mg | Week12 | FUS       | protein_coding | chr16 | 31191431  | 31203127 +  | 7218   | 10214.13 | 0        | 0.240795 | 0.061634 | 3.906837 | 0.000116 | 0.051763 | 1 |
| ENSG00000135409.6  | TREATTXTPF-00547659 7.5mg | Week12 | AMHR2     | protein_coding | chr12 | 53817639  | 53825318 +  | 3518   | 1.594475 | 0.618785 | 0.476884 | 0.12207  | 3.906658 | 0.000116 | 0.051763 | 1 |
| ENSG00000198286.5  | TREATTXTPF-00547659 225mg | Week12 | CARD11    | protein_coding | chr7  | 2945775   | 3083579 -   | 4707   | 4237.683 | 0        | 0.376391 | 0.096361 | 3.906044 | 0.000116 | 0.051763 | 1 |
| ENSG00000260876.1  | TREATTXTPF-00547659 75mg  | Week12 | RP11-345I | lincRNA        | chr16 | 79710005  | 79841819 +  | 2409   | 3.470718 | 0.40442  | 0.571815 | 0.146418 | 3.905376 | 0.000116 | 0.051763 | 1 |
| ENSG00000092201.5  | TREATTXTPF-00547659 225mg | Week12 | SUPT16H   | protein_coding | chr14 | 21819631  | 21852425 -  | 7151   | 4191.442 | 0        | 0.27421  | 0.070221 | 3.904956 | 0.000116 | 0.051763 | 1 |
| ENSG00000244560.2  | TREATTXTPF-00547659 225mg | Week12 | RP4-800G  | pseudogene     | chr7  | 148982372 | 148994403 + | 4271   | 58.64972 | 0.01326  | 0.639247 | 0.163704 | 3.904906 | 0.000116 | 0.051763 | 1 |

|                    |                            |        |           |                      |       |           |             |       |          |          |          |          |          |          |          |   |
|--------------------|----------------------------|--------|-----------|----------------------|-------|-----------|-------------|-------|----------|----------|----------|----------|----------|----------|----------|---|
| ENSG00000035720.3  | TREATTXTPF-00547659 225mg  | Week12 | STAP1     | protein_coding       | chr4  | 68424446  | 68473055 +  | 1655  | 327.1481 | 0        | 0.515041 | 0.131951 | 3.903291 | 0.000117 | 0.051763 | 1 |
| ENSG00000156414.14 | TREATTXTPF-00547659 75mg   | Week12 | TDRD9     | protein_coding       | chr14 | 104394799 | 104519004 + | 5480  | 553.0453 | 0        | -0.55552 | 0.142379 | -3.9017  | 0.000118 | 0.051763 | 1 |
| ENSG00000264198.1  | TREATTXTPF-00547659 225mg  | Week12 | RP11-94L1 | lincRNA              | chr17 | 37913974  | 37920089 -  | 6116  | 5796.403 | 0        | 0.375962 | 0.09636  | 3.901638 | 0.000118 | 0.051763 | 1 |
| ENSG00000158089.10 | TREATTXTPF-00547659 225mg  | Week12 | GALNT14   | protein_coding       | chr2  | 31133333  | 31378068 -  | 4567  | 718.6144 | 0        | -0.66236 | 0.169767 | -3.90161 | 0.000118 | 0.051763 | 1 |
| ENSG00000225940.1  | TREATTXTPF-00547659 75mg   | Week12 | AC022431  | protein_coding       | chr5  | 55807394  | 55902059 -  | 765   | 41.31934 | 0.009945 | -0.55764 | 0.142952 | -3.90091 | 0.000118 | 0.051763 | 1 |
| ENSG00000112182.10 | TREATTXTPF-00547659 225mg  | Week12 | BACH2     | protein_coding       | chr6  | 90636248  | 91006627 -  | 9786  | 1330.028 | 0.001105 | 0.528014 | 0.135418 | 3.899143 | 0.000119 | 0.051763 | 1 |
| ENSG00000116127.13 | TREATTXTPF-00547659 225mg  | Week12 | ALMS1     | protein_coding       | chr2  | 73612886  | 73837920 +  | 14066 | 552.137  | 0        | 0.383647 | 0.098405 | 3.898657 | 0.000119 | 0.051763 | 1 |
| ENSG00000259137.1  | TREATTXTPF-00547659 7.5mg  | Week12 | RP11-305E | pseudogene           | chr14 | 44589413  | 44589964 -  | 552   | 1.566851 | 0.633149 | 0.441163 | 0.113167 | 3.898321 | 0.00012  | 0.051763 | 1 |
| ENSG00000105576.11 | TREATTXTPF-00547659 225mg  | Week12 | TNPO2     | protein_coding       | chr19 | 12810008  | 12834825 -  | 7029  | 1752.291 | 0        | 0.266077 | 0.068307 | 3.895323 | 0.000121 | 0.052135 | 1 |
| ENSG00000178971.9  | TREATTXTPF-00547659 225mg  | Week12 | CTC1      | protein_coding       | chr17 | 8130191   | 8151362 -   | 6315  | 2928.214 | 0        | 0.318793 | 0.081868 | 3.894009 | 0.000122 | 0.052135 | 1 |
| ENSG00000267067.1  | TREATTXTPF-00547659 225mg  | Week12 | CTB-75G1  | lincRNA              | chr17 | 34990527  | 34991156 +  | 630   | 12.34696 | 0.072928 | 0.616271 | 0.15836  | 3.891579 | 0.000123 | 0.052135 | 1 |
| ENSG00000006607.9  | TREATTXTPF-00547659 225mg  | Week12 | FARP2     | protein_coding       | chr2  | 242295658 | 242434256 + | 14413 | 564.6751 | 0        | 0.36308  | 0.093312 | 3.89105  | 0.000123 | 0.052135 | 1 |
| ENSG00000261101.1  | TREATTXTPF-00547659 7.5mg  | Week12 | RP4-545K1 | sense_overlapping    | chrX  | 100882858 | 100883508 + | 651   | 2.587845 | 0.495028 | 0.569355 | 0.146336 | 3.890749 | 0.000123 | 0.052135 | 1 |
| ENSG00000167658.11 | TREATTXTPF-00547659 225mg  | Week12 | EEF2      | protein_coding       | chr19 | 3976054   | 3985467 -   | 4027  | 118441.8 | 0        | 0.271441 | 0.069811 | 3.888205 | 0.000124 | 0.05224  | 1 |
| ENSG00000063587.12 | TREATTXTPF-00547659 225mg  | Week12 | ZNF275    | protein_coding       | chrX  | 152599613 | 152625568 + | 8148  | 923.2464 | 0        | 0.383784 | 0.098711 | 3.887966 | 0.000124 | 0.05224  | 1 |
| ENSG00000111641.6  | TREATTXTPF-00547659 225mg  | Week12 | NOP2      | protein_coding       | chr12 | 6666029   | 6677857 -   | 4687  | 1654.875 | 0        | 0.299272 | 0.07702  | 3.885644 | 0.000126 | 0.052271 | 1 |
| ENSG00000241973.6  | TREATTXTPF-00547659 225mg  | Week12 | PI4KA     | protein_coding       | chr22 | 21061979  | 21213705 -  | 11407 | 5474.007 | 0        | 0.233384 | 0.06008  | 3.884568 | 0.000126 | 0.052271 | 1 |
| ENSG00000129351.13 | TREATTXTPF-00547659 225mg  | Week12 | ILF3      | protein_coding       | chr19 | 10764937  | 10803093 +  | 11024 | 8652.853 | 0        | 0.322069 | 0.082952 | 3.882608 | 0.000127 | 0.052271 | 1 |
| ENSG00000204282.3  | TREATTXTPF-00547659 225mg  | Week12 | TNRC6C-A  | processed_transcript | chr17 | 76103479  | 76107880 -  | 4402  | 2484.657 | 0        | 0.305912 | 0.078792 | 3.882504 | 0.000127 | 0.052271 | 1 |
| ENSG00000109063.10 | TREATTXTPF-00547659 225mg  | Week12 | MYH3      | protein_coding       | chr17 | 10531843  | 10560626 -  | 6686  | 245.1514 | 0        | 0.395559 | 0.10189  | 3.882232 | 0.000127 | 0.052271 | 1 |
| ENSG00000137497.13 | TREATTXTPF-00547659 225mg  | Week12 | NUMA1     | protein_coding       | chr11 | 71713910  | 71791739 -  | 15212 | 10070.56 | 0        | 0.291382 | 0.07509  | 3.880426 | 0.000128 | 0.052415 | 1 |
| ENSG00000166887.11 | TREATTXTPF-00547659 225mg  | Week12 | VPS39     | protein_coding       | chr15 | 42450899  | 42500514 -  | 7710  | 5831.696 | 0        | 0.147385 | 0.037996 | 3.879008 | 0.000129 | 0.05248  | 1 |
| ENSG00000086758.11 | TREATTXTPF-00547659 225mg  | Week12 | HUWE1     | protein_coding       | chrX  | 53559057  | 53713673 -  | 17373 | 6158.164 | 0        | 0.284566 | 0.071344 | 3.874809 | 0.000131 | 0.053121 | 1 |
| ENSG00000162144.5  | TREATTXTPF-00547659 225mg  | Week12 | CYB561A3  | protein_coding       | chr11 | 61116217  | 61129771 -  | 10597 | 4164.259 | 0        | 0.283301 | 0.073164 | 3.872126 | 0.000132 | 0.053369 | 1 |
| ENSG00000260876.1  | TREATTXTPF-00547659 22.5mg | Week12 | RP11-345I | lincRNA              | chr16 | 79710005  | 79841819 +  | 2409  | 3.470718 | 0.40442  | 0.574    | 0.148336 | 3.869589 | 0.000134 | 0.053369 | 1 |
| ENSG00000103365.11 | TREATTXTPF-00547659 225mg  | Week12 | GGA2      | protein_coding       | chr16 | 23474863  | 23533316 -  | 8231  | 4781.176 | 0        | 0.338378 | 0.087466 | 3.868671 | 0.000134 | 0.053369 | 1 |
| ENSG00000267080.1  | TREATTXTPF-00547659 225mg  | Week12 | ASB16-AS  | antisense            | chr17 | 42253341  | 42264085 -  | 2460  | 727.547  | 0        | 0.226416 | 0.058529 | 3.868425 | 0.000134 | 0.053369 | 1 |
| ENSG00000119401.10 | TREATTXTPF-00547659 225mg  | Week12 | TRIM32    | protein_coding       | chr9  | 119449581 | 119463579 + | 3780  | 399.2265 | 0        | 0.394131 | 0.10189  | 3.868206 | 0.000135 | 0.053369 | 1 |
| ENSG00000137337.10 | TREATTXTPF-00547659 225mg  | Week12 | MDC1      | protein_coding       | chr6  | 30667584  | 30685666 -  | 8064  | 1539.949 | 0        | 0.368756 | 0.095369 | 3.866634 | 0.000135 | 0.053474 | 1 |
| ENSG00000255455.2  | TREATTXTPF-00547659 225mg  | Week12 | RP11-890E | lincRNA              | chr11 | 130736149 | 130740142 - | 3994  | 610.6873 | 0        | 0.359299 | 0.092976 | 3.864426 | 0.000137 | 0.053713 | 1 |
| ENSG00000227372.6  | TREATTXTPF-00547659 225mg  | Week12 | TP73-AS1  | antisense            | chr1  | 3652548   | 3663900 -   | 6597  | 798.7359 | 0        | 0.369994 | 0.095843 | 3.860415 | 0.000139 | 0.054334 | 1 |
| ENSG00000099204.14 | TREATTXTPF-00547659 225mg  | Week12 | ABLIM1    | protein_coding       | chr10 | 116190872 | 116444762 - | 9871  | 5869.825 | 0        | 0.424825 | 0.110083 | 3.859137 | 0.000139 | 0.054345 | 1 |
| ENSG00000150337.9  | TREATTXTPF-00547659 225mg  | Week12 | FCGR1A    | protein_coding       | chr1  | 149754227 | 149764074 + | 2998  | 3521.94  | 0        | -0.61819 | 0.16024  | -3.85791 | 0.00014  | 0.054345 | 1 |
| ENSG00000130803.10 | TREATTXTPF-00547659 225mg  | Week12 | ZNF317    | protein_coding       | chr19 | 9251056   | 9274100 +   | 5065  | 1977.173 | 0        | 0.239843 | 0.062181 | 3.857203 | 0.00014  | 0.054345 | 1 |
| ENSG00000150990.3  | TREATTXTPF-00547659 225mg  | Week12 | DHX37     | protein_coding       | chr12 | 125431371 | 125473668 - | 6618  | 1052.093 | 0        | 0.308034 | 0.079895 | 3.855473 | 0.000141 | 0.05449  | 1 |
| ENSG00000099381.12 | TREATTXTPF-00547659 225mg  | Week12 | SETD1A    | protein_coding       | chr16 | 30968615  | 30996437 +  | 6903  | 1507.525 | 0        | 0.317039 | 0.082277 | 3.853334 | 0.000143 | 0.054723 | 1 |
| ENSG00000133030.15 | TREATTXTPF-00547659 225mg  | Week12 | MPRIP     | protein_coding       | chr17 | 16945859  | 17120993 +  | 18105 | 5072.642 | 0        | 0.359345 | 0.093302 | 3.851436 | 0.000144 | 0.054725 | 1 |
| ENSG00000157014.6  | TREATTXTPF-00547659 75mg   | Week12 | TATDN2    | protein_coding       | chr3  | 10289707  | 10322902 +  | 5572  | 1903.309 | 0        | 0.209601 | 0.054424 | 3.851252 | 0.000144 | 0.054725 | 1 |
| ENSG00000173715.11 | TREATTXTPF-00547659 225mg  | Week12 | C11orf80  | protein_coding       | chr11 | 66511922  | 66610987 +  | 3953  | 275.7425 | 0.00221  | 0.418799 | 0.108836 | 3.847996 | 0.000146 | 0.054866 | 1 |
| ENSG00000105409.11 | TREATTXTPF-00547659 75mg   | Week12 | ATP1A3    | protein_coding       | chr19 | 42470734  | 42501649 -  | 5069  | 303.9569 | 0        | 0.407663 | 0.105953 | 3.847575 | 0.000146 | 0.054866 | 1 |
| ENSG00000096433.6  | TREATTXTPF-00547659 225mg  | Week12 | ITPR3     | protein_coding       | chr6  | 33588142  | 33664351 +  | 9870  | 2073.708 | 0        | 0.435261 | 0.113128 | 3.847511 | 0.000146 | 0.054866 | 1 |
| ENSG00000198169.4  | TREATTXTPF-00547659 225mg  | Week12 | ZNF251    | protein_coding       | chr8  | 145946298 | 145981802 - | 4931  | 307.0597 | 0.001105 | 0.423295 | 0.110147 | 3.843014 | 0.000148 | 0.055135 | 1 |
| ENSG00000251695.2  | TREATTXTPF-00547659 225mg  | Week12 | AC124890  | protein_coding       | chr12 | 69186125  | 69187743 +  | 1619  | 23.72044 | 0.01768  | 0.5791   | 0.150756 | 3.841301 | 0.000149 | 0.055135 | 1 |
| ENSG00000149929.11 | TREATTXTPF-00547659 225mg  | Week12 | HIRIP3    | protein_coding       | chr16 | 30003645  | 30007757 -  | 3928  | 568.4188 | 0.001105 | 0.3507   | 0.091345 | 3.839309 | 0.000151 | 0.055135 | 1 |
| ENSG00000101298.9  | TREATTXTPF-00547659 225mg  | Week12 | SNPH      | protein_coding       | chr20 | 1246960   | 1289972 +   | 5572  | 599.305  | 0        | 0.42339  | 0.110305 | 3.838372 | 0.000151 | 0.055135 | 1 |
| ENSG00000120800.4  | TREATTXTPF-00547659 225mg  | Week12 | UTP20     | protein_coding       | chr12 | 101673887 | 101780394 + | 10024 | 479.2287 | 0        | 0.439715 | 0.114577 | 3.837737 | 0.000151 | 0.055135 | 1 |
| ENSG00000168066.16 | TREATTXTPF-00547659 225mg  | Week12 | SF1       | protein_coding       | chr11 | 64532078  | 64546258 -  | 5972  | 17926    | 0        | 0.16571  | 0.043208 | 3.835181 | 0.000153 | 0.055135 | 1 |
| ENSG00000172794.15 | TREATTXTPF-00547659 75mg   | Week12 | RAB37     | protein_coding       | chr17 | 72666717  | 72743474 +  | 5074  | 7786.986 | 0        | 0.178505 | 0.046557 | 3.834143 | 0.000154 | 0.055135 | 1 |
| ENSG00000128973.7  | TREATTXTPF-00547659 75mg   | Week12 | CLN6      | protein_coding       | chr15 | 68499330  | 68549549 -  | 4225  | 1406.41  | 0        | 0.250255 | 0.065339 | 3.830101 | 0.000156 | 0.055135 | 1 |
| ENSG00000031823.10 | TREATTXTPF-00547659 225mg  | Week12 | RANBP3    | protein_coding       | chr19 | 5916150   | 5978153 -   | 7445  | 3953.925 | 0        | 0.169144 | 0.044163 | 3.830001 | 0.000156 | 0.055135 | 1 |
| ENSG00000015532.5  | TREATTXTPF-00547659 225mg  | Week12 | XYLT2     | protein_coding       | chr17 | 48423453  | 48440499 +  | 5472  | 1191.074 | 0        | 0.278818 | 0.07282  | 3.828869 | 0.000157 | 0.055135 | 1 |
| ENSG00000236144.2  | TREATTXTPF-00547659 225mg  | Week12 | AD000090  | antisense            | chr19 | 36031640  | 36036931 -  | 4859  | 343.7127 | 0.001105 | 0.424741 | 0.110954 | 3.828073 | 0.000157 | 0.055135 | 1 |
| ENSG00000135426.10 | TREATTXTPF-00547659 225mg  | Week12 | TESPA1    | protein_coding       | chr12 | 55341802  | 55378530 -  | 5025  | 3513.955 | 0        | 0.403593 | 0.105443 | 3.827591 | 0.000158 | 0.055135 | 1 |

|                    |                            |        |           |                   |       |           |             |       |          |          |          |          |          |          |          |   |
|--------------------|----------------------------|--------|-----------|-------------------|-------|-----------|-------------|-------|----------|----------|----------|----------|----------|----------|----------|---|
| ENSG00000129347.15 | TREATTXTPF-00547659 225mg  | Week12 | KRI1      | protein_coding    | chr19 | 10663761  | 10676713 -  | 4260  | 2039.14  | 0        | 0.320183 | 0.083668 | 3.826826 | 0.000158 | 0.055135 | 1 |
| ENSG00000160223.12 | TREATTXTPF-00547659 225mg  | Week12 | ICOSLG    | protein_coding    | chr21 | 45642874  | 45660849 -  | 8110  | 856.5901 | 0        | 0.38419  | 0.100417 | 3.825965 | 0.000159 | 0.055135 | 1 |
| ENSG00000184205.10 | TREATTXTPF-00547659 225mg  | Week12 | TSPYL2    | protein_coding    | chrX  | 53111549  | 53117722 +  | 4948  | 1157.702 | 0        | 0.384098 | 0.100398 | 3.825764 | 0.000159 | 0.055135 | 1 |
| ENSG00000111203.7  | TREATTXTPF-00547659 225mg  | Week12 | ITFG2     | protein_coding    | chr12 | 2921788   | 2968957 +   | 6250  | 1362.528 | 0        | 0.320372 | 0.083776 | 3.824135 | 0.00016  | 0.055135 | 1 |
| ENSG00000122965.6  | TREATTXTPF-00547659 225mg  | Week12 | RBM19     | protein_coding    | chr12 | 114254543 | 114404176 - | 5909  | 1259.526 | 0        | 0.314764 | 0.082336 | 3.82294  | 0.00016  | 0.055135 | 1 |
| ENSG00000140829.7  | TREATTXTPF-00547659 225mg  | Week12 | DHX38     | protein_coding    | chr16 | 72127461  | 72146811 +  | 6209  | 3005.487 | 0        | 0.209465 | 0.054823 | 3.820754 | 0.000162 | 0.055135 | 1 |
| ENSG00000169129.10 | TREATTXTPF-00547659 225mg  | Week12 | AFAP1L2   | protein_coding    | chr10 | 116054583 | 116164515 - | 5948  | 147.5392 | 0        | 0.374486 | 0.098016 | 3.820676 | 0.000162 | 0.055135 | 1 |
| ENSG00000119714.6  | TREATTXTPF-00547659 75mg   | Week12 | GPR68     | protein_coding    | chr14 | 91698876  | 91720269 -  | 3278  | 516.3768 | 0        | 0.427573 | 0.111968 | 3.818697 | 0.000163 | 0.055135 | 1 |
| ENSG00000197358.8  | TREATTXTPF-00547659 225mg  | Week12 | BNIP3P1   | pseudogene        | chr14 | 28733596  | 28735180 +  | 1585  | 0.851934 | 0.794475 | 0.35724  | 0.093588 | 3.817173 | 0.000164 | 0.055135 | 1 |
| ENSG00000132182.7  | TREATTXTPF-00547659 225mg  | Week12 | NUP210    | protein_coding    | chr3  | 13357737  | 13461809 -  | 8180  | 8032.115 | 0        | 0.324088 | 0.084924 | 3.81623  | 0.000165 | 0.055135 | 1 |
| ENSG00000234771.2  | TREATTXTPF-00547659 225mg  | Week12 | RP11-395F | antisense         | chr9  | 130873450 | 130881013 - | 3958  | 646.7602 | 0        | 0.421262 | 0.110417 | 3.815193 | 0.000165 | 0.055135 | 1 |
| ENSG00000062524.11 | TREATTXTPF-00547659 75mg   | Week12 | LTK       | protein_coding    | chr15 | 41795836  | 41806085 -  | 3490  | 317.1171 | 0        | 0.466321 | 0.122244 | 3.814674 | 0.000166 | 0.055135 | 1 |
| ENSG00000184677.12 | TREATTXTPF-00547659 225mg  | Week12 | ZBTB40    | protein_coding    | chr1  | 22778344  | 22857650 +  | 8992  | 2474.501 | 0        | 0.389545 | 0.102122 | 3.814518 | 0.000166 | 0.055135 | 1 |
| ENSG00000181026.13 | TREATTXTPF-00547659 225mg  | Week12 | AEN       | protein_coding    | chr15 | 89164527  | 89175513 +  | 6018  | 1000.23  | 0        | 0.333833 | 0.087532 | 3.81383  | 0.000166 | 0.055135 | 1 |
| ENSG00000015676.13 | TREATTXTPF-00547659 225mg  | Week12 | NUDCD3    | protein_coding    | chr7  | 44418720  | 44530479 -  | 10113 | 2804.639 | 0        | 0.256063 | 0.067161 | 3.812696 | 0.000167 | 0.055135 | 1 |
| ENSG00000141720.7  | TREATTXTPF-00547659 225mg  | Week12 | PIP4K2B   | protein_coding    | chr17 | 36921942  | 36956379 -  | 6135  | 2961.069 | 0        | 0.254376 | 0.06672  | 3.812593 | 0.000167 | 0.055135 | 1 |
| ENSG00000130787.9  | TREATTXTPF-00547659 225mg  | Week12 | HIP1R     | protein_coding    | chr12 | 123319000 | 123347507 + | 7102  | 1376.288 | 0        | 0.418365 | 0.109764 | 3.811476 | 0.000168 | 0.055135 | 1 |
| ENSG00000108963.13 | TREATTXTPF-00547659 225mg  | Week12 | DPH1      | protein_coding    | chr17 | 1933404   | 1946724 +   | 5757  | 516.5006 | 0        | 0.400709 | 0.10515  | 3.810847 | 0.000168 | 0.055135 | 1 |
| ENSG00000141384.7  | TREATTXTPF-00547659 225mg  | Week12 | TAF4B     | protein_coding    | chr18 | 23805900  | 23971649 +  | 5395  | 247.8398 | 0.003315 | 0.594231 | 0.155938 | 3.810682 | 0.000168 | 0.055135 | 1 |
| ENSG00000215012.4  | TREATTXTPF-00547659 225mg  | Week12 | C22orf29  | protein_coding    | chr22 | 19833661  | 19842419 -  | 6803  | 902.4409 | 0        | 0.282925 | 0.074251 | 3.810369 | 0.000168 | 0.055135 | 1 |
| ENSG00000181754.6  | TREATTXTPF-00547659 225mg  | Week12 | AMIGO1    | protein_coding    | chr1  | 110046797 | 110052360 - | 5144  | 897.0972 | 0        | 0.439684 | 0.1154   | 3.810078 | 0.000169 | 0.055135 | 1 |
| ENSG00000197093.6  | TREATTXTPF-00547659 225mg  | Week12 | GAL3ST4   | protein_coding    | chr7  | 99756867  | 99766373 -  | 3397  | 392.8243 | 0        | 0.452235 | 0.118762 | 3.807919 | 0.00017  | 0.055135 | 1 |
| ENSG00000159753.9  | TREATTXTPF-00547659 225mg  | Week12 | RLTPR     | protein_coding    | chr16 | 67678822  | 67691472 +  | 7699  | 2129.309 | 0        | 0.393828 | 0.103428 | 3.807753 | 0.00017  | 0.055135 | 1 |
| ENSG00000258634.2  | TREATTXTPF-00547659 225mg  | Week12 | RP4-773N  | antisense         | chr1  | 110600962 | 110605177 + | 4216  | 411.4442 | 0.001105 | 0.294294 | 0.077292 | 3.807588 | 0.00017  | 0.055135 | 1 |
| ENSG00000134460.11 | TREATTXTPF-00547659 225mg  | Week12 | IL2RA     | protein_coding    | chr10 | 6052652   | 6104288 -   | 3176  | 531.7204 | 0        | 0.444518 | 0.116773 | 3.806674 | 0.000171 | 0.055135 | 1 |
| ENSG00000257337.2  | TREATTXTPF-00547659 225mg  | Week12 | RP11-983F | antisense         | chr12 | 53408380  | 53448222 -  | 4990  | 12.90055 | 0.055249 | 0.612398 | 0.160877 | 3.806623 | 0.000171 | 0.055135 | 1 |
| ENSG00000082438.11 | TREATTXTPF-00547659 225mg  | Week12 | COBLL1    | protein_coding    | chr2  | 165510134 | 165700189 - | 17176 | 265.6608 | 0.001105 | 0.524151 | 0.137707 | 3.806277 | 0.000171 | 0.055135 | 1 |
| ENSG00000112659.9  | TREATTXTPF-00547659 225mg  | Week12 | CUL9      | protein_coding    | chr6  | 43149913  | 43192325 +  | 12251 | 1713.996 | 0        | 0.238189 | 0.062598 | 3.805022 | 0.000172 | 0.055135 | 1 |
| ENSG00000205047.3  | TREATTXTPF-00547659 225mg  | Week12 | FLJ00104  | protein_coding    | chr16 | 87731749  | 87739290 -  | 6938  | 209.0829 | 0.003315 | 0.538618 | 0.141594 | 3.803951 | 0.000173 | 0.055135 | 1 |
| ENSG00000128908.11 | TREATTXTPF-00547659 225mg  | Week12 | INO80     | protein_coding    | chr15 | 41271078  | 41408552 -  | 7014  | 1813.225 | 0        | 0.299451 | 0.078737 | 3.803168 | 0.000173 | 0.055135 | 1 |
| ENSG00000197912.9  | TREATTXTPF-00547659 225mg  | Week12 | SPG7      | protein_coding    | chr16 | 89557325  | 89624176 +  | 10035 | 3212.859 | 0        | 0.223336 | 0.058747 | 3.801668 | 0.000174 | 0.055135 | 1 |
| ENSG00000166348.13 | TREATTXTPF-00547659 225mg  | Week12 | USP54     | protein_coding    | chr10 | 75257296  | 75385711 -  | 9850  | 118.5691 | 0.00442  | 0.47436  | 0.124818 | 3.800407 | 0.000175 | 0.055135 | 1 |
| ENSG00000105486.9  | TREATTXTPF-00547659 225mg  | Week12 | LIG1      | protein_coding    | chr19 | 48618702  | 48673860 -  | 6572  | 1177.871 | 0        | 0.32887  | 0.086571 | 3.798844 | 0.000176 | 0.055135 | 1 |
| ENSG00000111676.10 | TREATTXTPF-00547659 225mg  | Week12 | ATN1      | protein_coding    | chr12 | 7033626   | 7051484 +   | 4762  | 1127.069 | 0        | 0.359312 | 0.094602 | 3.798147 | 0.000176 | 0.055135 | 1 |
| ENSG00000111445.9  | TREATTXTPF-00547659 225mg  | Week12 | RFC5      | protein_coding    | chr12 | 118451393 | 118470935 + | 3248  | 369.4077 | 0.001105 | 0.293114 | 0.077174 | 3.798113 | 0.000176 | 0.055135 | 1 |
| ENSG00000090621.9  | TREATTXTPF-00547659 225mg  | Week12 | PABPC4    | protein_coding    | chr1  | 40026488  | 40042462 -  | 6782  | 5678.208 | 0        | 0.280306 | 0.073821 | 3.797082 | 0.000177 | 0.055135 | 1 |
| ENSG00000204084.8  | TREATTXTPF-00547659 225mg  | Week12 | INPP5B    | protein_coding    | chr1  | 38326369  | 38412729 -  | 9099  | 1671.701 | 0        | 0.275513 | 0.072566 | 3.796729 | 0.000177 | 0.055135 | 1 |
| ENSG00000081059.15 | TREATTXTPF-00547659 225mg  | Week12 | TCF7      | protein_coding    | chr5  | 133450402 | 133487556 + | 10063 | 14589.82 | 0        | 0.459989 | 0.121167 | 3.796315 | 0.000178 | 0.055135 | 1 |
| ENSG00000255569.1  | TREATTXTPF-00547659 225mg  | Week12 | TRAV1-1   | TR_V_gene         | chr14 | 22089991  | 22090720 +  | 392   | 52.61989 | 0.014365 | 0.598461 | 0.157714 | 3.794597 | 0.000179 | 0.055135 | 1 |
| ENSG00000136699.15 | TREATTXTPF-00547659 225mg  | Week12 | SMPD4     | protein_coding    | chr2  | 130908981 | 130940323 - | 7441  | 1816.918 | 0        | 0.309281 | 0.081507 | 3.794528 | 0.000179 | 0.055135 | 1 |
| ENSG00000198089.10 | TREATTXTPF-00547659 225mg  | Week12 | SFI1      | protein_coding    | chr22 | 31884674  | 32014572 +  | 12038 | 2431.186 | 0        | 0.312746 | 0.082432 | 3.793991 | 0.000179 | 0.055135 | 1 |
| ENSG00000179837.6  | TREATTXTPF-00547659 225mg  | Week12 | RBM15B    | protein_coding    | chr3  | 51428731  | 51435330 +  | 6600  | 3243.796 | 0        | 0.240436 | 0.063403 | 3.792217 | 0.000181 | 0.055135 | 1 |
| ENSG00000181894.10 | TREATTXTPF-00547659 225mg  | Week12 | ZNF329    | protein_coding    | chr19 | 58637619  | 58666477 -  | 4306  | 390.1878 | 0        | 0.369666 | 0.097493 | 3.791713 | 0.000181 | 0.055135 | 1 |
| ENSG00000111752.6  | TREATTXTPF-00547659 225mg  | Week12 | PHC1      | protein_coding    | chr12 | 9066492   | 9094063 +   | 6090  | 559.7448 | 0        | 0.422167 | 0.111435 | 3.788467 | 0.000183 | 0.055135 | 1 |
| ENSG00000132382.10 | TREATTXTPF-00547659 225mg  | Week12 | MYBBP1A   | protein_coding    | chr17 | 4442192   | 4458926 -   | 6203  | 1522.821 | 0        | 0.334225 | 0.08824  | 3.787684 | 0.000184 | 0.055135 | 1 |
| ENSG00000072736.14 | TREATTXTPF-00547659 75mg   | Week12 | NFATC3    | protein_coding    | chr16 | 68118654  | 68263162 +  | 8806  | 4184.881 | 0        | 0.258092 | 0.068145 | 3.787411 | 0.000184 | 0.055135 | 1 |
| ENSG00000103064.9  | TREATTXTPF-00547659 225mg  | Week12 | SLC7A6    | protein_coding    | chr16 | 68298433  | 68335722 +  | 7570  | 3429.44  | 0        | 0.406114 | 0.107231 | 3.787286 | 0.000184 | 0.055135 | 1 |
| ENSG00000142512.10 | TREATTXTPF-00547659 75mg   | Week12 | SIGLEC10  | protein_coding    | chr19 | 51913275  | 51921057 -  | 3667  | 7939.117 | 0        | 0.307587 | 0.081224 | 3.786879 | 0.000184 | 0.055135 | 1 |
| ENSG00000107263.14 | TREATTXTPF-00547659 75mg   | Week12 | RAPGEF1   | protein_coding    | chr9  | 134452157 | 134615461 - | 7123  | 9571.687 | 0        | 0.218169 | 0.05763  | 3.785705 | 0.000185 | 0.055135 | 1 |
| ENSG00000204176.9  | TREATTXTPF-00547659 22.5mg | Week12 | SYT15     | protein_coding    | chr10 | 46955444  | 46971400 -  | 7158  | 4.665193 | 0.311602 | 0.599911 | 0.158471 | 3.785614 | 0.000185 | 0.055135 | 1 |
| ENSG00000266904.1  | TREATTXTPF-00547659 225mg  | Week12 | LINC00663 | lincRNA           | chr19 | 19868175  | 19887232 -  | 4334  | 81.39558 | 0.007735 | 0.463104 | 0.12235  | 3.785071 | 0.000186 | 0.055135 | 1 |
| ENSG00000261533.1  | TREATTXTPF-00547659 225mg  | Week12 | RP11-15N  | sense_overlapping | chr3  | 99898411  | 99900574 +  | 2164  | 9.023204 | 0.120442 | 0.586498 | 0.15498  | 3.784346 | 0.000186 | 0.055135 | 1 |
| ENSG00000205356.5  | TREATTXTPF-00547659 225mg  | Week12 | TECPR1    | protein_coding    | chr7  | 97843936  | 97881563 -  | 9096  | 3743.146 | 0        | 0.201559 | 0.053264 | 3.78418  | 0.000186 | 0.055135 | 1 |

|                    |                           |        |            |                |       |           |             |       |          |          |          |          |          |          |          |   |
|--------------------|---------------------------|--------|------------|----------------|-------|-----------|-------------|-------|----------|----------|----------|----------|----------|----------|----------|---|
| ENSG00000099822.2  | TREATTXTPF-00547659 75mg  | Week12 | HCN2       | protein_coding | chr19 | 589893    | 617159 +    | 3408  | 91.63646 | 0        | 0.39872  | 0.105397 | 3.783045 | 0.000187 | 0.055135 | 1 |
| ENSG00000110274.10 | TREATTXTPF-00547659 225mg | Week12 | CEP164     | protein_coding | chr11 | 117185273 | 117283984 + | 11851 | 1393.25  | 0        | 0.245125 | 0.064833 | 3.780883 | 0.000189 | 0.055135 | 1 |
| ENSG00000144535.15 | TREATTXTPF-00547659 225mg | Week12 | DIS3L2     | protein_coding | chr2  | 232825955 | 233209060 + | 11341 | 667.9171 | 0        | 0.300934 | 0.079636 | 3.778887 | 0.00019  | 0.055135 | 1 |
| ENSG00000129355.6  | TREATTXTPF-00547659 225mg | Week12 | CDKN2D     | protein_coding | chr19 | 10677138  | 10679735 -  | 1503  | 5932.419 | 0        | -0.24972 | 0.066089 | -3.77846 | 0.00019  | 0.055135 | 1 |
| ENSG00000166341.6  | TREATTXTPF-00547659 225mg | Week12 | DCHS1      | protein_coding | chr11 | 6642556   | 6677085 -   | 10763 | 345.5547 | 0.001105 | 0.493401 | 0.130628 | 3.777149 | 0.000191 | 0.055135 | 1 |
| ENSG00000170949.13 | TREATTXTPF-00547659 225mg | Week12 | ZNF160     | protein_coding | chr19 | 53569859  | 53606689 -  | 8511  | 1226.193 | 0        | 0.310245 | 0.082141 | 3.776969 | 0.000191 | 0.055135 | 1 |
| ENSG0000005884.13  | TREATTXTPF-00547659 75mg  | Week12 | ITGA3      | protein_coding | chr17 | 48133332  | 48167845 +  | 9802  | 186.1304 | 0.001105 | 0.412187 | 0.109155 | 3.77616  | 0.000192 | 0.055135 | 1 |
| ENSG00000146021.10 | TREATTXTPF-00547659 225mg | Week12 | KLHL3      | protein_coding | chr5  | 136953189 | 137071779 - | 12173 | 377.0641 | 0        | 0.531054 | 0.140639 | 3.776022 | 0.000192 | 0.055135 | 1 |
| ENSG00000185163.5  | TREATTXTPF-00547659 225mg | Week12 | DDX51      | protein_coding | chr12 | 132621139 | 132628880 - | 6365  | 867.6751 | 0        | 0.325387 | 0.086194 | 3.775072 | 0.000193 | 0.055135 | 1 |
| ENSG00000130254.7  | TREATTXTPF-00547659 225mg | Week12 | SAFB2      | protein_coding | chr19 | 5587010   | 5624057 -   | 6222  | 3154.259 | 0        | 0.184105 | 0.04877  | 3.774932 | 0.000193 | 0.055135 | 1 |
| ENSG00000143365.12 | TREATTXTPF-00547659 75mg  | Week12 | RORC       | protein_coding | chr1  | 151778547 | 151804348 - | 6314  | 344.2475 | 0        | 0.418982 | 0.110996 | 3.774758 | 0.000193 | 0.055135 | 1 |
| ENSG00000160293.12 | TREATTXTPF-00547659 225mg | Week12 | VAV2       | protein_coding | chr9  | 136627016 | 136857726 - | 5682  | 665.411  | 0        | 0.389195 | 0.103127 | 3.773921 | 0.000194 | 0.055135 | 1 |
| ENSG00000160683.4  | TREATTXTPF-00547659 75mg  | Week12 | CXCR5      | protein_coding | chr11 | 118754475 | 118768508 + | 4431  | 1337.429 | 0.001105 | 0.450535 | 0.119382 | 3.773893 | 0.000194 | 0.055135 | 1 |
| ENSG00000184271.11 | TREATTXTPF-00547659 225mg | Week12 | POU6F1     | protein_coding | chr12 | 51580719  | 51611477 -  | 6021  | 686.8022 | 0.001105 | 0.424878 | 0.112594 | 3.773556 | 0.000194 | 0.055135 | 1 |
| ENSG00000152556.11 | TREATTXTPF-00547659 225mg | Week12 | PFKM       | protein_coding | chr12 | 48498922  | 48540187 +  | 7284  | 443.9591 | 0        | 0.30211  | 0.080074 | 3.772865 | 0.000194 | 0.055135 | 1 |
| ENSG00000097096.8  | TREATTXTPF-00547659 225mg | Week12 | SYDE2      | protein_coding | chr1  | 85622556  | 85666729 -  | 6451  | 15.26851 | 0.086188 | 0.722405 | 0.191519 | 3.771976 | 0.000195 | 0.055135 | 1 |
| ENSG00000184110.10 | TREATTXTPF-00547659 225mg | Week12 | EIF3C      | protein_coding | chr16 | 28699879  | 28747051 +  | 6982  | 261.4851 | 0        | 0.356453 | 0.094503 | 3.771869 | 0.000195 | 0.055135 | 1 |
| ENSG00000171408.9  | TREATTXTPF-00547659 225mg | Week12 | PDE7B      | protein_coding | chr6  | 136172834 | 136516712 + | 5708  | 42.11934 | 0.020994 | 0.676731 | 0.179418 | 3.771811 | 0.000195 | 0.055135 | 1 |
| ENSG00000253846.1  | TREATTXTPF-00547659 225mg | Week12 | PCDHGA1    | protein_coding | chr5  | 140792743 | 140892546 + | 4617  | 4.40663  | 0.330387 | 0.614092 | 0.162876 | 3.770299 | 0.000196 | 0.055135 | 1 |
| ENSG00000177239.10 | TREATTXTPF-00547659 225mg | Week12 | MAN1B1     | protein_coding | chr9  | 139981379 | 140003635 + | 8327  | 2914.365 | 0        | 0.223692 | 0.059332 | 3.770156 | 0.000196 | 0.055135 | 1 |
| ENSG00000125447.12 | TREATTXTPF-00547659 225mg | Week12 | GGA3       | protein_coding | chr17 | 73232694  | 73258444 -  | 6626  | 4288.743 | 0        | 0.168587 | 0.044719 | 3.769906 | 0.000197 | 0.055135 | 1 |
| ENSG00000264473.1  | TREATTXTPF-00547659 225mg | Week12 | hsa-mir-45 | miRNA          | chr14 | 106324334 | 106324411 - | 78    | 36.9105  | 0.020994 | 0.673318 | 0.178631 | 3.769323 | 0.000197 | 0.055135 | 1 |
| ENSG00000136573.8  | TREATTXTPF-00547659 75mg  | Week12 | BLK        | protein_coding | chr8  | 11351510  | 11422113 +  | 4803  | 1461.55  | 0        | 0.396761 | 0.105317 | 3.767291 | 0.000199 | 0.055401 | 1 |
| ENSG00000119599.12 | TREATTXTPF-00547659 225mg | Week12 | DCAF4      | protein_coding | chr14 | 73393040  | 73426411 +  | 5581  | 343.5624 | 0.001105 | 0.375558 | 0.099735 | 3.765568 | 0.0002   | 0.055466 | 1 |
| ENSG00000139645.9  | TREATTXTPF-00547659 225mg | Week12 | ANKRD52    | protein_coding | chr12 | 56631591  | 56652175 -  | 8820  | 2085.291 | 0        | 0.283328 | 0.075244 | 3.76545  | 0.0002   | 0.055466 | 1 |
| ENSG00000135898.5  | TREATTXTPF-00547659 75mg  | Week12 | GPR55      | protein_coding | chr2  | 231772033 | 231825781 - | 4130  | 293.2188 | 0        | 0.395214 | 0.10498  | 3.764661 | 0.000201 | 0.055472 | 1 |
| ENSG00000087269.11 | TREATTXTPF-00547659 225mg | Week12 | NOP14      | protein_coding | chr4  | 2939660   | 2965112 -   | 3538  | 1724.293 | 0        | 0.293533 | 0.077987 | 3.763854 | 0.000201 | 0.055481 | 1 |
| ENSG00000184613.6  | TREATTXTPF-00547659 225mg | Week12 | NELL2      | protein_coding | chr12 | 44902058  | 45315631 -  | 6424  | 1938.853 | 0        | 0.518426 | 0.137797 | 3.762232 | 0.000203 | 0.055664 | 1 |
| ENSG00000247982.2  | TREATTXTPF-00547659 225mg | Week12 | LINC00926  | lincRNA        | chr15 | 57592563  | 57599959 +  | 3124  | 1917.545 | 0.001105 | 0.541255 | 0.143953 | 3.759929 | 0.000204 | 0.05576  | 1 |
| ENSG00000136153.15 | TREATTXTPF-00547659 225mg | Week12 | LMO7       | protein_coding | chr13 | 76194570  | 76434004 +  | 13143 | 347.4011 | 0.00221  | 0.462995 | 0.123175 | 3.758836 | 0.000205 | 0.05576  | 1 |
| ENSG00000167074.10 | TREATTXTPF-00547659 225mg | Week12 | TEF        | protein_coding | chr22 | 41763337  | 41795330 +  | 4715  | 527.9856 | 0        | 0.369101 | 0.098204 | 3.758517 | 0.000205 | 0.05576  | 1 |
| ENSG00000211794.3  | TREATTXTPF-00547659 75mg  | Week12 | TRAV12-3   | TR_V_gene      | chr14 | 22433680  | 22434290 +  | 399   | 183.3669 | 0.00221  | 0.461971 | 0.122926 | 3.758134 | 0.000206 | 0.05576  | 1 |
| ENSG00000272024.1  | TREATTXTPF-00547659 225mg | Week12 | RP11-546f  | lincRNA        | chr8  | 52862844  | 52863250 +  | 407   | 2.648619 | 0.466298 | 0.519696 | 0.13829  | 3.758013 | 0.000206 | 0.05576  | 1 |
| ENSG00000238105.3  | TREATTXTPF-00547659 225mg | Week12 | GOLGA2B    | pseudogene     | chr12 | 100550135 | 100567437 - | 10957 | 447.0851 | 0        | 0.443487 | 0.118036 | 3.757229 | 0.000206 | 0.055767 | 1 |
| ENSG00000180758.10 | TREATTXTPF-00547659 225mg | Week12 | GPR157     | protein_coding | chr1  | 9160364   | 9189229 -   | 5372  | 328.1757 | 0        | 0.351761 | 0.093664 | 3.755564 | 0.000208 | 0.055953 | 1 |
| ENSG00000101868.6  | TREATTXTPF-00547659 225mg | Week12 | POLA1      | protein_coding | chrX  | 24712036  | 25015103 +  | 6336  | 335.9569 | 0        | 0.374664 | 0.099784 | 3.754743 | 0.000208 | 0.055953 | 1 |
| ENSG00000225614.2  | TREATTXTPF-00547659 225mg | Week12 | ZNF469     | protein_coding | chr16 | 88493879  | 88507165 +  | 13287 | 107.4442 | 0.001105 | 0.462728 | 0.123283 | 3.75337  | 0.000209 | 0.055953 | 1 |
| ENSG00000104880.13 | TREATTXTPF-00547659 75mg  | Week12 | ARHGEF18   | protein_coding | chr19 | 7459999   | 7537363 +   | 6235  | 5615.747 | 0        | 0.214153 | 0.057066 | 3.752761 | 0.00021  | 0.055953 | 1 |
| ENSG00000142207.5  | TREATTXTPF-00547659 225mg | Week12 | URB1       | protein_coding | chr21 | 33683329  | 33765335 -  | 11461 | 798.4575 | 0        | 0.354791 | 0.094544 | 3.752645 | 0.00021  | 0.055953 | 1 |
| ENSG00000170445.8  | TREATTXTPF-00547659 225mg | Week12 | HARS       | protein_coding | chr5  | 140052758 | 140071609 - | 8436  | 2050.606 | 0        | 0.221744 | 0.05912  | 3.750717 | 0.000212 | 0.056208 | 1 |
| ENSG00000106459.10 | TREATTXTPF-00547659 225mg | Week12 | NRF1       | protein_coding | chr7  | 129251555 | 129396922 + | 4125  | 1281.566 | 0        | 0.175248 | 0.046758 | 3.748002 | 0.000214 | 0.05635  | 1 |
| ENSG00000154957.9  | TREATTXTPF-00547659 75mg  | Week12 | ZNF18      | protein_coding | chr17 | 11880756  | 11900827 -  | 3006  | 1025.505 | 0        | 0.157146 | 0.041928 | 3.747979 | 0.000214 | 0.05635  | 1 |
| ENSG00000168781.17 | TREATTXTPF-00547659 225mg | Week12 | PIIP5K1    | protein_coding | chr15 | 43825660  | 43882430 -  | 8054  | 285.2033 | 0.001105 | 0.368538 | 0.098357 | 3.746951 | 0.000215 | 0.05635  | 1 |
| ENSG00000139613.7  | TREATTXTPF-00547659 225mg | Week12 | SMARCC2    | protein_coding | chr12 | 56556767  | 56583351 -  | 8555  | 4390.657 | 0        | 0.252624 | 0.067431 | 3.746415 | 0.000215 | 0.05635  | 1 |
| ENSG00000161791.9  | TREATTXTPF-00547659 225mg | Week12 | FNNL3      | protein_coding | chr12 | 50031724  | 50101948 -  | 11982 | 1916.319 | 0        | 0.379545 | 0.101315 | 3.746183 | 0.000215 | 0.05635  | 1 |
| ENSG00000234436.1  | TREATTXTPF-00547659 75mg  | Week12 | ACO08984   | pseudogene     | chr19 | 54813047  | 54817309 -  | 404   | 60.9105  | 0.00442  | -0.52243 | 0.139542 | -3.74388 | 0.000217 | 0.05635  | 1 |
| ENSG00000175970.7  | TREATTXTPF-00547659 225mg | Week12 | UNC119B    | protein_coding | chr12 | 121148238 | 121161443 + | 4560  | 1682.453 | 0        | 0.274073 | 0.073228 | 3.742732 | 0.000218 | 0.05635  | 1 |
| ENSG00000059122.12 | TREATTXTPF-00547659 225mg | Week12 | FLYWCH1    | protein_coding | chr16 | 2961938   | 3001209 +   | 8413  | 2181.004 | 0        | 0.352231 | 0.094124 | 3.742202 | 0.000219 | 0.05635  | 1 |
| ENSG00000153563.11 | TREATTXTPF-00547659 75mg  | Week12 | CDBA       | protein_coding | chr2  | 87011729  | 87035519 -  | 3638  | 7478.793 | 0        | 0.414765 | 0.110862 | 3.741256 | 0.000219 | 0.05635  | 1 |
| ENSG00000137073.16 | TREATTXTPF-00547659 225mg | Week12 | UBAP2      | protein_coding | chr9  | 33921691  | 34048947 -  | 10610 | 839.2508 | 0        | 0.299097 | 0.079951 | 3.740993 | 0.00022  | 0.05635  | 1 |
| ENSG00000180921.6  | TREATTXTPF-00547659 225mg | Week12 | FAM83H     | protein_coding | chr8  | 144806103 | 144815971 - | 5654  | 194.8088 | 0.001105 | 0.341195 | 0.091212 | 3.740699 | 0.00022  | 0.05635  | 1 |
| ENSG00000101445.5  | TREATTXTPF-00547659 225mg | Week12 | PPP1R16B   | protein_coding | chr20 | 37434348  | 37551667 +  | 6400  | 2970.737 | 0        | 0.382207 | 0.102223 | 3.738967 | 0.000221 | 0.05635  | 1 |
| ENSG00000121417.9  | TREATTXTPF-00547659 225mg | Week12 | ZNF211     | protein_coding | chr19 | 58141761  | 58154147 +  | 3301  | 916.1812 | 0        | 0.279858 | 0.074851 | 3.738848 | 0.000221 | 0.05635  | 1 |

|                    |                            |        |           |                      |       |           |             |       |          |          |          |          |          |          |          |   |
|--------------------|----------------------------|--------|-----------|----------------------|-------|-----------|-------------|-------|----------|----------|----------|----------|----------|----------|----------|---|
| ENSG00000164344.11 | TREATTXTPF-00547659 225mg  | Week12 | KLKB1     | protein_coding       | chr4  | 187130133 | 187179625 + | 2953  | 49.97348 | 0.01326  | 0.624476 | 0.167032 | 3.738658 | 0.000222 | 0.05635  | 1 |
| ENSG00000005194.10 | TREATTXTPF-00547659 225mg  | Week12 | CIAPIN1   | protein_coding       | chr16 | 57462081  | 57481440 -  | 3509  | 1261.075 | 0        | 0.235204 | 0.062912 | 3.738645 | 0.000222 | 0.05635  | 1 |
| ENSG00000140326.8  | TREATTXTPF-00547659 75mg   | Week12 | CDAN1     | protein_coding       | chr15 | 43015757  | 43029324 -  | 5428  | 607.1425 | 0        | 0.256813 | 0.068694 | 3.738527 | 0.000222 | 0.05635  | 1 |
| ENSG00000111271.10 | TREATTXTPF-00547659 225mg  | Week12 | ACAD10    | protein_coding       | chr12 | 112123857 | 112194903 + | 8926  | 1121.897 | 0        | 0.184351 | 0.049328 | 3.737259 | 0.000223 | 0.056416 | 1 |
| ENSG00000103415.7  | TREATTXTPF-00547659 75mg   | Week12 | HMOX2     | protein_coding       | chr16 | 4524691   | 4560348 +   | 3793  | 3058.208 | 0        | 0.228708 | 0.061217 | 3.736    | 0.000224 | 0.056416 | 1 |
| ENSG00000178921.9  | TREATTXTPF-00547659 225mg  | Week12 | PFAS      | protein_coding       | chr17 | 8150936   | 8173809 +   | 6471  | 589.5359 | 0        | 0.340087 | 0.091033 | 3.735858 | 0.000224 | 0.056416 | 1 |
| ENSG00000135392.11 | TREATTXTPF-00547659 225mg  | Week12 | DNAJC14   | protein_coding       | chr12 | 56214744  | 56224608 -  | 4190  | 1322.778 | 0        | 0.184279 | 0.049354 | 3.733819 | 0.000226 | 0.056416 | 1 |
| ENSG00000150337.9  | TREATTXTPF-00547659 75mg   | Week12 | FCGR1A    | protein_coding       | chr1  | 149754227 | 149764074 + | 2998  | 3521.94  | 0        | -0.58042 | 0.15549  | -3.73285 | 0.000226 | 0.056416 | 1 |
| ENSG00000164742.10 | TREATTXTPF-00547659 225mg  | Week12 | ADCY1     | protein_coding       | chr7  | 45613739  | 45762715 +  | 13530 | 3.697238 | 0.414365 | 0.585238 | 0.156783 | 3.732799 | 0.000227 | 0.056416 | 1 |
| ENSG00000214203.4  | TREATTXTPF-00547659 7.5mg  | Week12 | RPS4XP1   | pseudogene           | chr12 | 100402830 | 100403616 - | 787   | 10.63757 | 0.055249 | 0.538473 | 0.144279 | 3.732158 | 0.000227 | 0.056416 | 1 |
| ENSG00000185437.9  | TREATTXTPF-00547659 22.5mg | Week12 | SH3BGR    | protein_coding       | chr21 | 40817781  | 40887433 +  | 1495  | 21.82099 | 0.022099 | 0.534059 | 0.143114 | 3.731717 | 0.000227 | 0.056416 | 1 |
| ENSG00000131845.10 | TREATTXTPF-00547659 225mg  | Week12 | ZNF304    | protein_coding       | chr19 | 57862675  | 57871266 +  | 4609  | 468.1779 | 0        | 0.391678 | 0.104961 | 3.731663 | 0.000227 | 0.056416 | 1 |
| ENSG00000167595.10 | TREATTXTPF-00547659 225mg  | Week12 | C19orf55  | protein_coding       | chr19 | 36249044  | 36261930 +  | 6328  | 539.3094 | 0        | 0.256334 | 0.068712 | 3.730547 | 0.000228 | 0.056416 | 1 |
| ENSG00000146830.9  | TREATTXTPF-00547659 225mg  | Week12 | GIGYF1    | protein_coding       | chr7  | 100277130 | 100287071 - | 6709  | 5025.078 | 0        | 0.20894  | 0.056039 | 3.728474 | 0.00023  | 0.056416 | 1 |
| ENSG00000105369.5  | TREATTXTPF-00547659 75mg   | Week12 | CD79A     | protein_coding       | chr19 | 42381190  | 42385439 +  | 1503  | 5494.951 | 0        | 0.433823 | 0.116356 | 3.728418 | 0.00023  | 0.056416 | 1 |
| ENSG00000196756.7  | TREATTXTPF-00547659 225mg  | Week12 | SNHG17    | processed_transcript | chr20 | 37049235  | 37063996 -  | 4186  | 532.7514 | 0        | 0.322444 | 0.086488 | 3.728206 | 0.00023  | 0.056416 | 1 |
| ENSG00000197077.8  | TREATTXTPF-00547659 75mg   | Week12 | KIAA1671  | protein_coding       | chr22 | 25348697  | 25593415 +  | 15818 | 343.853  | 0.001105 | 0.565268 | 0.151655 | 3.727334 | 0.000231 | 0.056416 | 1 |
| ENSG00000178199.9  | TREATTXTPF-00547659 225mg  | Week12 | ZC3H12D   | protein_coding       | chr6  | 149768794 | 149806197 - | 5163  | 1196.696 | 0        | 0.470992 | 0.126392 | 3.72643  | 0.000232 | 0.056416 | 1 |
| ENSG0000021406.4   | TREATTXTPF-00547659 225mg  | Week12 | ZNF549    | protein_coding       | chr19 | 58038693  | 58068910 +  | 9279  | 435.4287 | 0.00221  | 0.491091 | 0.131791 | 3.726279 | 0.000232 | 0.056416 | 1 |
| ENSG00000235106.4  | TREATTXTPF-00547659 225mg  | Week12 | LINC00094 | antisense            | chr9  | 136890561 | 136899788 + | 5994  | 545.1359 | 0        | 0.322591 | 0.086574 | 3.726206 | 0.000232 | 0.056416 | 1 |
| ENSG00000096093.10 | TREATTXTPF-00547659 225mg  | Week12 | EFHC1     | protein_coding       | chr6  | 52285106  | 52387892 +  | 7510  | 217.347  | 0        | 0.3827   | 0.102716 | 3.725797 | 0.000233 | 0.056416 | 1 |
| ENSG00000183826.12 | TREATTXTPF-00547659 225mg  | Week12 | BTBD9     | protein_coding       | chr6  | 38136227  | 38607924 -  | 9451  | 1045.173 | 0        | 0.208419 | 0.05595  | 3.725117 | 0.000233 | 0.056417 | 1 |
| ENSG00000115207.9  | TREATTXTPF-00547659 225mg  | Week12 | GTF3C2    | protein_coding       | chr2  | 27548716  | 27579868 -  | 5704  | 2700.61  | 0        | 0.245361 | 0.06589  | 3.723785 | 0.000234 | 0.056464 | 1 |
| ENSG00000131089.9  | TREATTXTPF-00547659 225mg  | Week12 | ARHGFE9   | protein_coding       | chrX  | 62854847  | 63005426 -  | 6673  | 698.7834 | 0        | 0.355446 | 0.095459 | 3.723552 | 0.000235 | 0.056464 | 1 |
| ENSG00000168685.10 | TREATTXTPF-00547659 225mg  | Week12 | IL7R      | protein_coding       | chr5  | 35852797  | 35879705 +  | 6060  | 19146.59 | 0        | 0.466133 | 0.125232 | 3.722145 | 0.000236 | 0.056467 | 1 |
| ENSG00000198019.8  | TREATTXTPF-00547659 75mg   | Week12 | FCGR1B    | protein_coding       | chr1  | 120926979 | 120935937 - | 1392  | 1191.251 | 0        | -0.47044 | 0.126399 | -3.72186 | 0.000236 | 0.056467 | 1 |
| ENSG00000171791.10 | TREATTXTPF-00547659 225mg  | Week12 | BCL2      | protein_coding       | chr18 | 60790579  | 60987361 -  | 7665  | 2821.994 | 0        | 0.458674 | 0.123249 | 3.721532 | 0.000236 | 0.056467 | 1 |
| ENSG00000159267.10 | TREATTXTPF-00547659 225mg  | Week12 | HLC5      | protein_coding       | chr21 | 38123189  | 38362536 -  | 7708  | 394.7956 | 0        | 0.370863 | 0.099726 | 3.718805 | 0.000239 | 0.056891 | 1 |
| ENSG00000166689.10 | TREATTXTPF-00547659 225mg  | Week12 | PLEKHA7   | protein_coding       | chr11 | 16799842  | 17035990 -  | 9575  | 108.5978 | 0.003315 | 0.471229 | 0.126773 | 3.717116 | 0.00024  | 0.056891 | 1 |
| ENSG00000110844.9  | TREATTXTPF-00547659 225mg  | Week12 | PRPF40B   | protein_coding       | chr12 | 49962001  | 50038449 +  | 9444  | 156.0486 | 0.001105 | 0.397789 | 0.10702  | 3.71696  | 0.000241 | 0.056891 | 1 |
| ENSG00000183019.3  | TREATTXTPF-00547659 225mg  | Week12 | C19orf59  | protein_coding       | chr19 | 7741514   | 7744712 +   | 1906  | 3653.652 | 0        | -0.731   | 0.196669 | -3.71691 | 0.000241 | 0.056891 | 1 |
| ENSG00000250602.1  | TREATTXTPF-00547659 225mg  | Week12 | RP11-5171 | antisense            | chr5  | 125769197 | 125826063 - | 1689  | 3.352486 | 0.394475 | 0.54887  | 0.147751 | 3.714841 | 0.000242 | 0.056931 | 1 |
| ENSG00000119509.8  | TREATTXTPF-00547659 225mg  | Week12 | INVS      | protein_coding       | chr9  | 102861538 | 103063282 + | 6241  | 348.495  | 0        | 0.301167 | 0.081072 | 3.714799 | 0.000242 | 0.056931 | 1 |
| ENSG00000075856.7  | TREATTXTPF-00547659 225mg  | Week12 | SART3     | protein_coding       | chr12 | 108916357 | 108955176 - | 7270  | 2507.497 | 0        | 0.263166 | 0.070854 | 3.714204 | 0.000243 | 0.056931 | 1 |
| ENSG00000173473.6  | TREATTXTPF-00547659 225mg  | Week12 | SMARCC1   | protein_coding       | chr3  | 47626762  | 47823596 -  | 7645  | 3983.864 | 0        | 0.253243 | 0.068208 | 3.712831 | 0.000244 | 0.056931 | 1 |
| ENSG00000162739.9  | TREATTXTPF-00547659 75mg   | Week12 | SLAMF6    | protein_coding       | chr1  | 160454820 | 160493052 - | 2746  | 3623.271 | 0        | 0.329959 | 0.088878 | 3.712511 | 0.000245 | 0.056931 | 1 |
| ENSG00000117090.10 | TREATTXTPF-00547659 225mg  | Week12 | SLAMF1    | protein_coding       | chr1  | 160577890 | 160617085 - | 4219  | 1221.752 | 0        | 0.385726 | 0.103903 | 3.712371 | 0.000245 | 0.056931 | 1 |
| ENSG00000153790.7  | TREATTXTPF-00547659 225mg  | Week12 | C7orf31   | protein_coding       | chr7  | 25174316  | 25219975 -  | 3837  | 368.853  | 0        | 0.362705 | 0.097708 | 3.712142 | 0.000245 | 0.056931 | 1 |
| ENSG00000180357.5  | TREATTXTPF-00547659 225mg  | Week12 | ZNF609    | protein_coding       | chr15 | 64752941  | 64978264 +  | 12111 | 2234.587 | 0        | 0.313325 | 0.084492 | 3.708346 | 0.000248 | 0.057286 | 1 |
| ENSG00000133422.8  | TREATTXTPF-00547659 225mg  | Week12 | MORC2     | protein_coding       | chr22 | 31321117  | 31364284 -  | 6258  | 2040.378 | 0        | 0.311979 | 0.084131 | 3.708271 | 0.000249 | 0.057286 | 1 |
| ENSG00000001497.12 | TREATTXTPF-00547659 225mg  | Week12 | LAS1L     | protein_coding       | chrX  | 64732462  | 64754655 -  | 5589  | 1177.853 | 0        | 0.285862 | 0.077093 | 3.708013 | 0.000249 | 0.057286 | 1 |
| ENSG00000175376.4  | TREATTXTPF-00547659 225mg  | Week12 | EIF1AD    | protein_coding       | chr11 | 65764016  | 65796947 -  | 3327  | 1475.42  | 0        | 0.189373 | 0.051079 | 3.707452 | 0.000249 | 0.057286 | 1 |
| ENSG00000162408.10 | TREATTXTPF-00547659 225mg  | Week12 | NOL9      | protein_coding       | chr1  | 6581407   | 6614595 -   | 7293  | 1218.192 | 0        | 0.330356 | 0.089125 | 3.706654 | 0.00025  | 0.057286 | 1 |
| ENSG00000148840.6  | TREATTXTPF-00547659 225mg  | Week12 | PPRC1     | protein_coding       | chr10 | 103892787 | 103910082 + | 6053  | 1249.856 | 0        | 0.314846 | 0.084948 | 3.70635  | 0.00025  | 0.057286 | 1 |
| ENSG00000179912.15 | TREATTXTPF-00547659 225mg  | Week12 | R3HDM2    | protein_coding       | chr12 | 57643392  | 57824788 -  | 6267  | 2283.687 | 0        | 0.180363 | 0.048676 | 3.70537  | 0.000251 | 0.057286 | 1 |
| ENSG00000119596.13 | TREATTXTPF-00547659 225mg  | Week12 | YLPM1     | protein_coding       | chr14 | 75230069  | 75322244 +  | 10749 | 2180.602 | 0        | 0.306007 | 0.082585 | 3.70535  | 0.000251 | 0.057286 | 1 |
| ENSG00000165055.11 | TREATTXTPF-00547659 225mg  | Week12 | METTL2B   | protein_coding       | chr7  | 128116783 | 128146656 + | 6749  | 559.3834 | 0        | 0.304644 | 0.082262 | 3.703323 | 0.000253 | 0.057348 | 1 |
| ENSG00000006062.9  | TREATTXTPF-00547659 225mg  | Week12 | MAP3K14   | processed_transcript | chr17 | 43340488  | 43394414 +  | 5132  | 2706.144 | 0        | 0.237159 | 0.064044 | 3.703088 | 0.000253 | 0.057348 | 1 |
| ENSG00000136068.10 | TREATTXTPF-00547659 225mg  | Week12 | FLNB      | protein_coding       | chr3  | 57994127  | 58157982 +  | 13956 | 1593.845 | 0        | 0.357259 | 0.096493 | 3.70245  | 0.000254 | 0.057348 | 1 |
| ENSG00000162894.7  | TREATTXTPF-00547659 75mg   | Week12 | FAIM3     | protein_coding       | chr1  | 207077731 | 207096592 - | 2348  | 8873.392 | 0        | 0.364506 | 0.09846  | 3.702078 | 0.000254 | 0.057348 | 1 |
| ENSG00000167483.13 | TREATTXTPF-00547659 225mg  | Week12 | FAM129C   | protein_coding       | chr19 | 17634110  | 17664648 +  | 6628  | 1622.45  | 0        | 0.477868 | 0.129087 | 3.701895 | 0.000255 | 0.057348 | 1 |
| ENSG00000090975.8  | TREATTXTPF-00547659 225mg  | Week12 | PITPNM2   | protein_coding       | chr12 | 123468027 | 123634562 - | 9165  | 1094.808 | 0        | 0.311749 | 0.084263 | 3.699709 | 0.000257 | 0.057685 | 1 |
| ENSG00000211809.2  | TREATTXTPF-00547659 75mg   | Week12 | TRAV27    | TR_V_gene            | chr14 | 22615949  | 22616587 +  | 425   | 90.28619 | 0.005525 | 0.529988 | 0.14333  | 3.697674 | 0.000259 | 0.057742 | 1 |



|                    |                           |        |           |                |       |           |             |       |          |          |          |          |          |          |          |   |
|--------------------|---------------------------|--------|-----------|----------------|-------|-----------|-------------|-------|----------|----------|----------|----------|----------|----------|----------|---|
| ENSG00000162241.8  | TREATTXTPF-00547659 225mg | Week12 | SLC25A45  | protein_coding | chr11 | 65142663  | 65151172 -  | 7855  | 1159.107 | 0        | 0.291914 | 0.078948 | 3.69756  | 0.000259 | 0.057742 | 1 |
| ENSG00000182463.11 | TREATTXTPF-00547659 225mg | Week12 | TSHZ2     | protein_coding | chr20 | 51588946  | 52111869 +  | 12582 | 202.9635 | 0.00442  | 0.603816 | 0.163311 | 3.697345 | 0.000259 | 0.057742 | 1 |
| ENSG00000152022.7  | TREATTXTPF-00547659 75mg  | Week12 | LIX1L     | protein_coding | chr1  | 145477085 | 145501669 + | 3979  | 2339.228 | 0        | 0.224211 | 0.060648 | 3.696944 | 0.000259 | 0.057742 | 1 |
| ENSG00000067369.9  | TREATTXTPF-00547659 225mg | Week12 | TP53BP1   | protein_coding | chr15 | 43699407  | 43802926 -  | 8843  | 925.2243 | 0        | 0.281435 | 0.076142 | 3.696192 | 0.00026  | 0.05777  | 1 |
| ENSG00000020256.15 | TREATTXTPF-00547659 225mg | Week12 | ZFP64     | protein_coding | chr20 | 50668202  | 50820847 -  | 6997  | 418.589  | 0        | 0.335344 | 0.090752 | 3.695188 | 0.000261 | 0.057853 | 1 |
| ENSG00000112159.7  | TREATTXTPF-00547659 225mg | Week12 | MDN1      | protein_coding | chr6  | 90352218  | 90529442 -  | 18602 | 1596.499 | 0        | 0.407867 | 0.110406 | 3.694229 | 0.000262 | 0.057927 | 1 |
| ENSG00000065357.15 | TREATTXTPF-00547659 225mg | Week12 | DGKA      | protein_coding | chr12 | 56321103  | 56347811 +  | 10215 | 7500.47  | 0        | 0.293984 | 0.079639 | 3.691469 | 0.000265 | 0.058244 | 1 |
| ENSG00000126767.13 | TREATTXTPF-00547659 225mg | Week12 | ELK1      | protein_coding | chrX  | 47494920  | 47510003 -  | 3398  | 1108.635 | 0        | 0.238603 | 0.064647 | 3.690835 | 0.000265 | 0.058244 | 1 |
| ENSG00000072858.6  | TREATTXTPF-00547659 225mg | Week12 | SIDT1     | protein_coding | chr3  | 113251143 | 113348425 + | 8072  | 1149.919 | 0        | 0.376815 | 0.102107 | 3.690386 | 0.000266 | 0.058244 | 1 |
| ENSG00000004975.7  | TREATTXTPF-00547659 225mg | Week12 | DVL2      | protein_coding | chr17 | 7128660   | 7137864 -   | 5350  | 1053.295 | 0        | 0.269434 | 0.073011 | 3.690309 | 0.000266 | 0.058244 | 1 |
| ENSG00000174151.10 | TREATTXTPF-00547659 225mg | Week12 | CYB561D1  | protein_coding | chr1  | 110036674 | 110045554 + | 5690  | 2841.366 | 0        | 0.213318 | 0.057829 | 3.688776 | 0.000267 | 0.058334 | 1 |
| ENSG00000078699.17 | TREATTXTPF-00547659 225mg | Week12 | CBFA2T2   | protein_coding | chr20 | 32077881  | 32237842 +  | 9457  | 1391.811 | 0        | 0.340721 | 0.092374 | 3.68849  | 0.000268 | 0.058334 | 1 |
| ENSG00000168763.11 | TREATTXTPF-00547659 225mg | Week12 | CNNM3     | protein_coding | chr2  | 97481982  | 97499648 +  | 4416  | 1500.319 | 0        | 0.232685 | 0.063095 | 3.687874 | 0.000268 | 0.058334 | 1 |
| ENSG00000106952.3  | TREATTXTPF-00547659 225mg | Week12 | TNFSF8    | protein_coding | chr9  | 117656003 | 117692697 - | 2348  | 1459.597 | 0        | 0.297351 | 0.08065  | 3.686915 | 0.000269 | 0.058334 | 1 |
| ENSG00000249673.2  | TREATTXTPF-00547659 225mg | Week12 | NOP14-AS  | antisense      | chr4  | 2936626   | 2963465 +   | 7195  | 469.7823 | 0        | 0.243432 | 0.066036 | 3.686349 | 0.00027  | 0.058334 | 1 |
| ENSG00000006555.6  | TREATTXTPF-00547659 225mg | Week12 | TTC22     | protein_coding | chr1  | 55245385  | 55266940 -  | 6055  | 669.8641 | 0        | 0.288851 | 0.078366 | 3.685929 | 0.00027  | 0.058334 | 1 |
| ENSG00000138074.10 | TREATTXTPF-00547659 225mg | Week12 | SLCSA6    | protein_coding | chr2  | 27422455  | 27435826 -  | 5606  | 722.4166 | 0        | 0.284046 | 0.077069 | 3.685631 | 0.000271 | 0.058334 | 1 |
| ENSG00000126746.13 | TREATTXTPF-00547659 225mg | Week12 | ZNF384    | protein_coding | chr12 | 6775643   | 6798738 -   | 5181  | 3028.229 | 0        | 0.179045 | 0.048592 | 3.684673 | 0.000272 | 0.058411 | 1 |
| ENSG00000166405.10 | TREATTXTPF-00547659 225mg | Week12 | RIC3      | protein_coding | chr11 | 8127597   | 8190602 -   | 7700  | 329.6641 | 0.00221  | 0.576827 | 0.15662  | 3.682971 | 0.000273 | 0.058653 | 1 |
| ENSG00000182841.8  | TREATTXTPF-00547659 225mg | Week12 | RRP7B     | pseudogene     | chr22 | 42951229  | 42978044 -  | 5092  | 285.6133 | 0        | 0.40002  | 0.108648 | 3.681788 | 0.000275 | 0.058698 | 1 |
| ENSG00000196235.9  | TREATTXTPF-00547659 225mg | Week12 | SUPT5H    | protein_coding | chr19 | 39926796  | 39967310 +  | 8191  | 5611.372 | 0        | 0.19787  | 0.05375  | 3.681296 | 0.000275 | 0.058698 | 1 |
| ENSG00000196724.8  | TREATTXTPF-00547659 225mg | Week12 | ZNF418    | protein_coding | chr19 | 58433252  | 58446761 -  | 4501  | 136.4243 | 0        | 0.437772 | 0.118929 | 3.680963 | 0.000275 | 0.058698 | 1 |
| ENSG00000139725.3  | TREATTXTPF-00547659 75mg  | Week12 | RHOF      | protein_coding | chr12 | 122215664 | 122241309 - | 6177  | 4453.059 | 0        | 0.271433 | 0.073754 | 3.680255 | 0.000276 | 0.058722 | 1 |
| ENSG00000007516.9  | TREATTXTPF-00547659 225mg | Week12 | BAIAP3    | protein_coding | chr16 | 1383602   | 1399439 +   | 6143  | 752.8044 | 0        | 0.406635 | 0.110526 | 3.679101 | 0.000277 | 0.058845 | 1 |
| ENSG00000141665.7  | TREATTXTPF-00547659 225mg | Week12 | FBXO15    | protein_coding | chr18 | 71740588  | 71815100 -  | 6198  | 18.35359 | 0.035359 | 0.639359 | 0.173854 | 3.677569 | 0.000279 | 0.058953 | 1 |
| ENSG00000113263.8  | TREATTXTPF-00547659 225mg | Week12 | ITK       | protein_coding | chr5  | 156569944 | 156682201 + | 8604  | 5879.534 | 0        | 0.460734 | 0.125303 | 3.676971 | 0.00028  | 0.058953 | 1 |
| ENSG00000112486.10 | TREATTXTPF-00547659 225mg | Week12 | CCR6      | protein_coding | chr6  | 167525295 | 167553184 + | 4226  | 39.92376 | 0.020994 | 0.623479 | 0.169582 | 3.67657  | 0.00028  | 0.058953 | 1 |
| ENSG00000198019.8  | TREATTXTPF-00547659 225mg | Week12 | FCGR1B    | protein_coding | chr1  | 120926979 | 120935937 - | 1392  | 1191.251 | 0        | -0.47636 | 0.129579 | -3.67623 | 0.00028  | 0.058953 | 1 |
| ENSG00000108312.10 | TREATTXTPF-00547659 225mg | Week12 | UBTF      | protein_coding | chr17 | 42282401  | 42298994 -  | 6993  | 6451.442 | 0        | 0.220771 | 0.060077 | 3.674795 | 0.000282 | 0.058992 | 1 |
| ENSG00000158863.17 | TREATTXTPF-00547659 225mg | Week12 | FAM160B   | protein_coding | chr8  | 21946670  | 21962409 +  | 8278  | 844.7171 | 0        | 0.334404 | 0.091007 | 3.674497 | 0.000282 | 0.058992 | 1 |
| ENSG00000186166.4  | TREATTXTPF-00547659 225mg | Week12 | CCDC84    | protein_coding | chr11 | 118868852 | 118886501 + | 5105  | 1487.683 | 0        | 0.305046 | 0.083058 | 3.672684 | 0.000284 | 0.058992 | 1 |
| ENSG00000137502.5  | TREATTXTPF-00547659 225mg | Week12 | RAB30     | protein_coding | chr11 | 82684175  | 82782965 -  | 11701 | 467.5381 | 0.001105 | 0.481935 | 0.131263 | 3.671511 | 0.000285 | 0.058992 | 1 |
| ENSG00000144645.9  | TREATTXTPF-00547659 225mg | Week12 | OSBPL10   | protein_coding | chr3  | 31699382  | 32119072 -  | 11976 | 373.547  | 0.00221  | 0.546547 | 0.148885 | 3.670944 | 0.000286 | 0.058992 | 1 |
| ENSG00000163516.9  | TREATTXTPF-00547659 225mg | Week12 | ANKZF1    | protein_coding | chr2  | 220094479 | 220101391 + | 6119  | 3073.545 | 0        | 0.186183 | 0.050723 | 3.67062  | 0.000286 | 0.058992 | 1 |
| ENSG00000119771.10 | TREATTXTPF-00547659 225mg | Week12 | KLHL29    | protein_coding | chr2  | 23608088  | 23931481 +  | 11071 | 47.67293 | 0.018785 | 0.677544 | 0.18461  | 3.670133 | 0.000287 | 0.058992 | 1 |
| ENSG00000072736.14 | TREATTXTPF-00547659 225mg | Week12 | NFATC3    | protein_coding | chr16 | 68118654  | 68263162 +  | 8806  | 4184.881 | 0        | 0.256458 | 0.069898 | 3.669039 | 0.000288 | 0.058992 | 1 |
| ENSG00000122986.9  | TREATTXTPF-00547659 225mg | Week12 | HVCN1     | protein_coding | chr12 | 111065646 | 111142755 - | 3595  | 4402.122 | 0        | 0.26071  | 0.071068 | 3.66844  | 0.000289 | 0.058992 | 1 |
| ENSG00000198728.6  | TREATTXTPF-00547659 225mg | Week12 | LDB1      | protein_coding | chr10 | 103867317 | 103880210 - | 2790  | 4827.344 | 0        | 0.20767  | 0.056611 | 3.668374 | 0.000289 | 0.058992 | 1 |
| ENSG00000128159.7  | TREATTXTPF-00547659 225mg | Week12 | TUBGCP6   | protein_coding | chr22 | 50656118  | 50683421 -  | 7689  | 3267.077 | 0        | 0.314713 | 0.085801 | 3.667925 | 0.000289 | 0.058992 | 1 |
| ENSG00000125482.8  | TREATTXTPF-00547659 225mg | Week12 | TF1       | protein_coding | chr9  | 135251008 | 135282209 - | 3113  | 735.1823 | 0        | 0.232602 | 0.063444 | 3.666248 | 0.000291 | 0.058992 | 1 |
| ENSG00000141040.10 | TREATTXTPF-00547659 225mg | Week12 | ZNF287    | protein_coding | chr17 | 16454701  | 16472520 -  | 3566  | 145.7823 | 0.003315 | 0.483382 | 0.131857 | 3.665961 | 0.000291 | 0.058992 | 1 |
| ENSG00000100395.10 | TREATTXTPF-00547659 225mg | Week12 | L3MBTL2   | protein_coding | chr22 | 41601209  | 41627275 +  | 6451  | 1746.394 | 0        | 0.272103 | 0.074227 | 3.665835 | 0.000291 | 0.058992 | 1 |
| ENSG00000245466.1  | TREATTXTPF-00547659 225mg | Week12 | CTD-2540l | lincRNA        | chr14 | 71075515  | 71108015 -  | 2941  | 13.43536 | 0.072928 | 0.634367 | 0.173055 | 3.665697 | 0.000292 | 0.058992 | 1 |
| ENSG00000160818.12 | TREATTXTPF-00547659 225mg | Week12 | GPATCH4   | protein_coding | chr1  | 156564279 | 156571288 - | 4437  | 582.1812 | 0        | 0.335147 | 0.091431 | 3.665597 | 0.000292 | 0.058992 | 1 |
| ENSG00000041802.6  | TREATTXTPF-00547659 225mg | Week12 | LSG1      | protein_coding | chr3  | 194361517 | 194393206 - | 4818  | 1447.591 | 0        | 0.310327 | 0.08468  | 3.664704 | 0.000293 | 0.058992 | 1 |
| ENSG00000153064.7  | TREATTXTPF-00547659 225mg | Week12 | BANK1     | protein_coding | chr4  | 102332443 | 102995969 + | 6144  | 1574.429 | 0        | 0.467179 | 0.127495 | 3.664294 | 0.000293 | 0.058992 | 1 |
| ENSG00000146285.9  | TREATTXTPF-00547659 75mg  | Week12 | SCML4     | protein_coding | chr6  | 108025308 | 108145521 - | 7116  | 1768.394 | 0        | 0.263911 | 0.072032 | 3.663829 | 0.000294 | 0.058992 | 1 |
| ENSG00000172530.15 | TREATTXTPF-00547659 75mg  | Week12 | BANP      | protein_coding | chr16 | 87982850  | 88110924 +  | 7679  | 1597.526 | 0        | 0.18405  | 0.050235 | 3.663765 | 0.000294 | 0.058992 | 1 |
| ENSG00000108469.10 | TREATTXTPF-00547659 225mg | Week12 | RECL5     | protein_coding | chr17 | 73622925  | 73663269 -  | 8766  | 977.3613 | 0        | 0.20926  | 0.057123 | 3.663347 | 0.000294 | 0.058992 | 1 |
| ENSG00000172215.5  | TREATTXTPF-00547659 75mg  | Week12 | CXCR6     | protein_coding | chr3  | 45982425  | 45989845 +  | 3769  | 403.8906 | 0.001105 | 0.463861 | 0.126644 | 3.662702 | 0.000295 | 0.058992 | 1 |
| ENSG00000187535.9  | TREATTXTPF-00547659 225mg | Week12 | IFT140    | protein_coding | chr16 | 1560428   | 1662111 -   | 8168  | 206.1613 | 0        | 0.317079 | 0.086574 | 3.662517 | 0.000295 | 0.058992 | 1 |
| ENSG00000100311.12 | TREATTXTPF-00547659 75mg  | Week12 | PDGFB     | protein_coding | chr22 | 39619364  | 39640756 -  | 3761  | 179.5602 | 0        | 0.426536 | 0.11647  | 3.662202 | 0.000295 | 0.058992 | 1 |
| ENSG00000100105.13 | TREATTXTPF-00547659 225mg | Week12 | PATZ1     | protein_coding | chr22 | 31721790  | 31742218 -  | 5693  | 1774.928 | 0        | 0.272203 | 0.074243 | 3.661452 | 0.000296 | 0.059034 | 1 |

|                    |                           |        |           |                |       |           |             |       |          |          |          |          |          |          |          |   |
|--------------------|---------------------------|--------|-----------|----------------|-------|-----------|-------------|-------|----------|----------|----------|----------|----------|----------|----------|---|
| ENSG00000171992.8  | TREATTXTPF-00547659 225mg | Week12 | SYNPO     | protein_coding | chr5  | 149980642 | 150038782 + | 10258 | 275.0243 | 0.001105 | 0.536864 | 0.146719 | 3.659116 | 0.000299 | 0.059426 | 1 |
| ENSG00000110851.7  | TREATTXTPF-00547659 225mg | Week12 | PRDM4     | protein_coding | chr12 | 108126643 | 108155049 - | 4777  | 1400.049 | 0        | 0.263019 | 0.071937 | 3.65623  | 0.000302 | 0.059827 | 1 |
| ENSG00000113716.8  | TREATTXTPF-00547659 225mg | Week12 | HMGXB3    | protein_coding | chr5  | 149379884 | 149432386 + | 5934  | 1441.43  | 0        | 0.297412 | 0.081345 | 3.656193 | 0.000302 | 0.059827 | 1 |
| ENSG00000085982.9  | TREATTXTPF-00547659 225mg | Week12 | USP40     | protein_coding | chr2  | 234384166 | 234475428 - | 9352  | 540.989  | 0        | 0.322521 | 0.088253 | 3.654487 | 0.000304 | 0.060047 | 1 |
| ENSG00000133884.5  | TREATTXTPF-00547659 75mg  | Week12 | DPF2      | protein_coding | chr11 | 65101225  | 65120720 +  | 7715  | 4098.845 | 0        | 0.161973 | 0.044327 | 3.654093 | 0.000305 | 0.060047 | 1 |
| ENSG00000085788.9  | TREATTXTPF-00547659 225mg | Week12 | DDHD2     | protein_coding | chr8  | 38082736  | 38133076 +  | 10686 | 1072.661 | 0        | 0.384033 | 0.105138 | 3.652675 | 0.000306 | 0.06024  | 1 |
| ENSG00000267868.1  | TREATTXTPF-00547659 225mg | Week12 | RP11-120H | lincRNA        | chr13 | 113619149 | 113620445 - | 1297  | 9.38674  | 0.143646 | 0.645297 | 0.176791 | 3.650053 | 0.000309 | 0.060706 | 1 |
| ENSG00000126217.16 | TREATTXTPF-00547659 225mg | Week12 | MCF2L     | protein_coding | chr13 | 113548692 | 113754053 + | 23204 | 198.9558 | 0        | 0.423041 | 0.115973 | 3.647762 | 0.000312 | 0.061046 | 1 |
| ENSG00000135597.14 | TREATTXTPF-00547659 225mg | Week12 | REPS1     | protein_coding | chr6  | 139224630 | 139309398 - | 9602  | 1505.629 | 0        | 0.275845 | 0.075627 | 3.647442 | 0.000312 | 0.061046 | 1 |
| ENSG00000055483.15 | TREATTXTPF-00547659 225mg | Week12 | USP36     | protein_coding | chr17 | 76783463  | 76837523 -  | 10409 | 2069.825 | 0        | 0.319377 | 0.087603 | 3.645753 | 0.000314 | 0.061213 | 1 |
| ENSG00000234553.1  | TREATTXTPF-00547659 75mg  | Week12 | AC022431  | sense_intronic | chr5  | 55832410  | 55833653 -  | 536   | 11.30608 | 0.106077 | -0.58634 | 0.160852 | -3.64521 | 0.000315 | 0.061213 | 1 |
| ENSG00000185684.8  | TREATTXTPF-00547659 225mg | Week12 | EP400NL   | protein_coding | chr12 | 132568828 | 132613029 + | 9105  | 231.3768 | 0        | 0.397148 | 0.108955 | 3.645054 | 0.000315 | 0.061213 | 1 |
| ENSG00000123411.10 | TREATTXTPF-00547659 225mg | Week12 | IKZF4     | protein_coding | chr12 | 56401443  | 56432219 +  | 6808  | 284.1691 | 0.001105 | 0.386261 | 0.106048 | 3.642337 | 0.000318 | 0.061708 | 1 |
| ENSG00000144524.13 | TREATTXTPF-00547659 225mg | Week12 | COPS7B    | protein_coding | chr2  | 232646381 | 232673963 + | 6034  | 1429.073 | 0        | 0.260224 | 0.071549 | 3.637014 | 0.000325 | 0.062431 | 1 |
| ENSG00000135318.7  | TREATTXTPF-00547659 225mg | Week12 | TFSE      | protein_coding | chr6  | 86159809  | 86205500 +  | 4017  | 369.1812 | 0.00221  | 0.540172 | 0.148539 | 3.636559 | 0.000325 | 0.062431 | 1 |
| ENSG00000100060.13 | TREATTXTPF-00547659 225mg | Week12 | MFNG      | protein_coding | chr22 | 37865101  | 37882439 -  | 3042  | 7226.232 | 0        | 0.219423 | 0.06034  | 3.636445 | 0.000325 | 0.062431 | 1 |
| ENSG00000100060.13 | TREATTXTPF-00547659 75mg  | Week12 | MFNG      | protein_coding | chr22 | 37865101  | 37882439 -  | 3042  | 7226.232 | 0        | 0.214184 | 0.058907 | 3.635994 | 0.000326 | 0.062431 | 1 |
| ENSG00000172878.9  | TREATTXTPF-00547659 225mg | Week12 | METAP1D   | protein_coding | chr2  | 172864490 | 172947158 + | 4850  | 213.3414 | 0        | 0.40989  | 0.112758 | 3.635131 | 0.000327 | 0.062431 | 1 |
| ENSG00000148468.12 | TREATTXTPF-00547659 225mg | Week12 | FAM171A   | protein_coding | chr10 | 15253642  | 15413061 -  | 3955  | 234.2276 | 0.001105 | 0.441468 | 0.121447 | 3.63506  | 0.000327 | 0.062431 | 1 |
| ENSG00000196405.8  | TREATTXTPF-00547659 225mg | Week12 | EVL       | protein_coding | chr14 | 100437786 | 100610573 + | 10585 | 16259.03 | 0        | 0.357662 | 0.098403 | 3.634646 | 0.000327 | 0.062431 | 1 |
| ENSG00000179409.6  | TREATTXTPF-00547659 225mg | Week12 | GEMIN4    | protein_coding | chr17 | 647654    | 657239 -    | 5751  | 876.895  | 0        | 0.293541 | 0.080766 | 3.634456 | 0.000328 | 0.062431 | 1 |
| ENSG00000172660.7  | TREATTXTPF-00547659 225mg | Week12 | TAF15     | protein_coding | chr17 | 34136459  | 34191619 +  | 5903  | 3483.818 | 0        | 0.32252  | 0.088754 | 3.633849 | 0.000328 | 0.062431 | 1 |
| ENSG00000197386.6  | TREATTXTPF-00547659 225mg | Week12 | HTT       | protein_coding | chr4  | 3076408   | 3245676 +   | 18118 | 3573.257 | 0        | 0.263304 | 0.072464 | 3.633577 | 0.000329 | 0.062431 | 1 |
| ENSG00000139641.8  | TREATTXTPF-00547659 225mg | Week12 | ESYT1     | protein_coding | chr12 | 56512034  | 56538455 +  | 5493  | 10501.04 | 0        | 0.340994 | 0.093855 | 3.633219 | 0.000329 | 0.062431 | 1 |
| ENSG00000205485.9  | TREATTXTPF-00547659 225mg | Week12 | AC004980  | pseudogene     | chr7  | 76178677  | 76257299 +  | 3110  | 98.39116 | 0.00221  | 0.362781 | 0.099898 | 3.631532 | 0.000331 | 0.062553 | 1 |
| ENSG00000078269.9  | TREATTXTPF-00547659 225mg | Week12 | SYNJ2     | protein_coding | chr6  | 158402888 | 158520208 + | 9985  | 640.1127 | 0        | 0.346632 | 0.095454 | 3.631396 | 0.000331 | 0.062553 | 1 |
| ENSG00000168067.7  | TREATTXTPF-00547659 225mg | Week12 | MAP4K2    | protein_coding | chr11 | 64556290  | 64570713 -  | 3745  | 3343.688 | 0        | 0.180893 | 0.049822 | 3.630773 | 0.000332 | 0.062553 | 1 |
| ENSG00000143799.8  | TREATTXTPF-00547659 225mg | Week12 | PARP1     | protein_coding | chr1  | 226548392 | 226595780 - | 7169  | 5443.191 | 0        | 0.318041 | 0.087605 | 3.630416 | 0.000333 | 0.062553 | 1 |
| ENSG00000136802.7  | TREATTXTPF-00547659 75mg  | Week12 | LRRC8A    | protein_coding | chr9  | 131644391 | 131680318 + | 5230  | 1579.777 | 0        | 0.220977 | 0.060878 | 3.629849 | 0.000333 | 0.062553 | 1 |
| ENSG00000126602.6  | TREATTXTPF-00547659 225mg | Week12 | TRAP1     | protein_coding | chr16 | 3701640   | 3767598     | 5227  | 1401.295 | 0        | 0.297517 | 0.081972 | 3.629476 | 0.000334 | 0.062553 | 1 |
| ENSG00000163930.5  | TREATTXTPF-00547659 225mg | Week12 | BAP1      | protein_coding | chr3  | 52435029  | 52444366 -  | 5055  | 4222.252 | 0        | 0.137823 | 0.037993 | 3.627627 | 0.000336 | 0.062636 | 1 |
| ENSG00000161570.4  | TREATTXTPF-00547659 75mg  | Week12 | CCL5      | protein_coding | chr17 | 34198495  | 34207797 -  | 1512  | 18425.27 | 0        | 0.393053 | 0.108356 | 3.627413 | 0.000336 | 0.062636 | 1 |
| ENSG00000166197.12 | TREATTXTPF-00547659 225mg | Week12 | NOLC1     | protein_coding | chr10 | 103911933 | 103923627 + | 3969  | 2487.306 | 0        | 0.325529 | 0.089751 | 3.627016 | 0.000337 | 0.062636 | 1 |
| ENSG00000160190.9  | TREATTXTPF-00547659 225mg | Week12 | SLC37A1   | protein_coding | chr21 | 43916118  | 44001550 +  | 6814  | 958.674  | 0        | 0.247794 | 0.06832  | 3.626989 | 0.000337 | 0.062636 | 1 |
| ENSG00000185986.10 | TREATTXTPF-00547659 225mg | Week12 | SDHAP3    | pseudogene     | chr5  | 1568637   | 1594735 -   | 1954  | 249.5083 | 0.00221  | 0.499383 | 0.13771  | 3.626342 | 0.000338 | 0.062636 | 1 |
| ENSG00000155016.13 | TREATTXTPF-00547659 225mg | Week12 | CPY2U1    | protein_coding | chr4  | 108852525 | 108874613 + | 6096  | 304.6055 | 0.001105 | 0.407206 | 0.112304 | 3.625943 | 0.000338 | 0.062636 | 1 |
| ENSG00000196510.8  | TREATTXTPF-00547659 225mg | Week12 | ANAPC7    | protein_coding | chr12 | 110810705 | 110841535 - | 6009  | 1625.222 | 0        | 0.195675 | 0.053986 | 3.624525 | 0.00034  | 0.062717 | 1 |
| ENSG00000176293.15 | TREATTXTPF-00547659 225mg | Week12 | ZNF135    | protein_coding | chr19 | 58570607  | 58597677 +  | 6418  | 75.6663  | 0.005525 | 0.499424 | 0.137792 | 3.624477 | 0.00034  | 0.062717 | 1 |
| ENSG00000103043.10 | TREATTXTPF-00547659 225mg | Week12 | VAC14     | protein_coding | chr16 | 70721342  | 70835064 +  | 8278  | 1977.567 | 0        | 0.238412 | 0.065825 | 3.621913 | 0.000343 | 0.062717 | 1 |
| ENSG00000140320.7  | TREATTXTPF-00547659 225mg | Week12 | BAHD1     | protein_coding | chr15 | 40731920  | 40760441 +  | 5196  | 1916.786 | 0        | 0.299126 | 0.082593 | 3.621694 | 0.000344 | 0.062717 | 1 |
| ENSG00000001461.12 | TREATTXTPF-00547659 225mg | Week12 | NIPAL3    | protein_coding | chr1  | 24742284  | 24799466 +  | 9404  | 1706.482 | 0        | 0.341769 | 0.094368 | 3.621656 | 0.000344 | 0.062717 | 1 |
| ENSG00000008710.13 | TREATTXTPF-00547659 225mg | Week12 | PKD1      | protein_coding | chr16 | 2138711   | 2185899 -   | 18532 | 1496.516 | 0        | 0.358373 | 0.098982 | 3.620574 | 0.000345 | 0.062717 | 1 |
| ENSG00000090920.9  | TREATTXTPF-00547659 225mg | Week12 | FCGBP     | protein_coding | chr19 | 40353963  | 40440533 -  | 16564 | 460.379  | 0.001105 | 0.492083 | 0.135964 | 3.619219 | 0.000347 | 0.062717 | 1 |
| ENSG00000213762.6  | TREATTXTPF-00547659 225mg | Week12 | ZNF134    | protein_coding | chr19 | 58125601  | 58134724 +  | 3771  | 800.2387 | 0        | 0.299924 | 0.082879 | 3.618883 | 0.000347 | 0.062717 | 1 |
| ENSG00000135213.8  | TREATTXTPF-00547659 225mg | Week12 | POM121C   | protein_coding | chr7  | 75046066  | 75115548 -  | 8771  | 2677.931 | 0        | 0.261913 | 0.072378 | 3.618707 | 0.000347 | 0.062717 | 1 |
| ENSG00000164091.7  | TREATTXTPF-00547659 225mg | Week12 | WDR82     | protein_coding | chr3  | 52288437  | 52322036 -  | 5726  | 9628.161 | 0        | 0.251997 | 0.06965  | 3.618036 | 0.000348 | 0.062717 | 1 |
| ENSG00000214022.7  | TREATTXTPF-00547659 225mg | Week12 | REPIN1    | protein_coding | chr7  | 150065278 | 150071133 + | 4649  | 3389.895 | 0        | 0.232925 | 0.064384 | 3.617739 | 0.000349 | 0.062717 | 1 |
| ENSG00000174292.8  | TREATTXTPF-00547659 225mg | Week12 | TNK1      | protein_coding | chr17 | 7283853   | 7293093 +   | 3860  | 122.8398 | 0.005525 | 0.547533 | 0.151347 | 3.617738 | 0.000349 | 0.062717 | 1 |
| ENSG00000169239.8  | TREATTXTPF-00547659 225mg | Week12 | CASB      | protein_coding | chrX  | 15706953  | 15805747 +  | 7735  | 992.4541 | 0        | 0.335819 | 0.092845 | 3.616981 | 0.00035  | 0.062717 | 1 |
| ENSG00000157985.13 | TREATTXTPF-00547659 75mg  | Week12 | AGAP1     | protein_coding | chr2  | 236402733 | 237040444 + | 13896 | 206.8166 | 0.001105 | 0.493587 | 0.136478 | 3.616612 | 0.00035  | 0.062717 | 1 |
| ENSG00000125246.11 | TREATTXTPF-00547659 225mg | Week12 | CLYBL     | protein_coding | chr13 | 100258919 | 100549387 + | 7826  | 199.2276 | 0.001105 | 0.44465  | 0.122947 | 3.616607 | 0.00035  | 0.062717 | 1 |
| ENSG00000162298.12 | TREATTXTPF-00547659 225mg | Week12 | SYVN1     | protein_coding | chr11 | 64889252  | 64902004 -  | 5496  | 2957.609 | 0        | 0.231072 | 0.063895 | 3.616429 | 0.00035  | 0.062717 | 1 |
| ENSG00000238121.1  | TREATTXTPF-00547659 75mg  | Week12 | LINC0042E | lincRNA        | chr13 | 30914407  | 30951282 -  | 3972  | 469.779  | 0        | 0.388934 | 0.107564 | 3.615838 | 0.000351 | 0.062717 | 1 |

|                     |                           |        |            |                      |       |           |             |  |       |          |          |          |          |           |          |          |   |
|---------------------|---------------------------|--------|------------|----------------------|-------|-----------|-------------|--|-------|----------|----------|----------|----------|-----------|----------|----------|---|
| ENSG00000147224.6   | TREATTXTPF-00547659 225mg | Week12 | PRPS1      | protein_coding       | chrX  | 106871737 | 106894256 + |  | 2197  | 1582.246 | 0        | 0.281875 | 0.077959 | 3.615699  | 0.000351 | 0.062717 | 1 |
| ENSG00000166938.8   | TREATTXTPF-00547659 225mg | Week12 | DIS3L      | protein_coding       | chr15 | 66585555  | 66626236 +  |  | 5436  | 952.1978 | 0        | 0.352423 | 0.09752  | 3.613865  | 0.000354 | 0.062717 | 1 |
| ENSG00000007545.11  | TREATTXTPF-00547659 225mg | Week12 | CRAMP1L    | protein_coding       | chr16 | 1662326   | 1727909 +   |  | 8427  | 651.7536 | 0        | 0.263757 | 0.072995 | 3.613347  | 0.000354 | 0.062717 | 1 |
| ENSG00000078967.8   | TREATTXTPF-00547659 225mg | Week12 | UBE2D4     | protein_coding       | chr7  | 43966037  | 43995735 +  |  | 4713  | 446.0906 | 0        | 0.267825 | 0.074123 | 3.6133241 | 0.000354 | 0.062717 | 1 |
| ENSG00000144504.11  | TREATTXTPF-00547659 225mg | Week12 | ANKMY1     | protein_coding       | chr2  | 241418839 | 241508626 - |  | 11477 | 769.7779 | 0        | 0.300786 | 0.083246 | 3.6132247 | 0.000354 | 0.062717 | 1 |
| ENSG00000103657.9   | TREATTXTPF-00547659 225mg | Week12 | HERC1      | protein_coding       | chr15 | 63900817  | 64126141 -  |  | 17053 | 4668.12  | 0        | 0.274053 | 0.075865 | 3.612372  | 0.000356 | 0.062717 | 1 |
| ENSG00000160469.12  | TREATTXTPF-00547659 225mg | Week12 | BRSK1      | protein_coding       | chr19 | 55793440  | 55823901 +  |  | 3841  | 29.61215 | 0.005525 | 0.493646 | 0.136656 | 3.612333  | 0.000356 | 0.062717 | 1 |
| ENSG00000065675.10  | TREATTXTPF-00547659 225mg | Week12 | PRKCQ      | protein_coding       | chr10 | 6469105   | 6622263 -   |  | 3285  | 1841.476 | 0        | 0.351444 | 0.097316 | 3.611386  | 0.000357 | 0.062717 | 1 |
| ENSG00000248445.1   | TREATTXTPF-00547659 225mg | Week12 | CTB-118Nt  | antisense            | chr5  | 115783243 | 115843972 + |  | 2829  | 52.47845 | 0.009945 | 0.505101 | 0.139886 | 3.610798  | 0.000358 | 0.062717 | 1 |
| ENSG00000163463.7   | TREATTXTPF-00547659 225mg | Week12 | KRTCAP2    | protein_coding       | chr1  | 155141884 | 155145951 - |  | 3826  | 253.6475 | 0.001105 | 0.292244 | 0.080942 | 3.610511  | 0.000358 | 0.062717 | 1 |
| ENSG00000168395.10  | TREATTXTPF-00547659 225mg | Week12 | ING5       | protein_coding       | chr2  | 242641450 | 242668893 + |  | 8200  | 977.9392 | 0        | 0.279912 | 0.077545 | 3.609689  | 0.000359 | 0.062717 | 1 |
| ENSG00000092068.14  | TREATTXTPF-00547659 225mg | Week12 | SLC7A8     | protein_coding       | chr14 | 23594504  | 23652883 -  |  | 5942  | 181.0641 | 0.001105 | 0.49156  | 0.136179 | 3.609667  | 0.000359 | 0.062717 | 1 |
| ENSG000000012124.10 | TREATTXTPF-00547659 225mg | Week12 | CD22       | protein_coding       | chr19 | 35810164  | 35838258 +  |  | 5839  | 2954.065 | 0        | 0.425635 | 0.117918 | 3.60957   | 0.000359 | 0.062717 | 1 |
| ENSG00000100628.7   | TREATTXTPF-00547659 75mg  | Week12 | ASB2       | protein_coding       | chr14 | 94400499  | 94443137 -  |  | 5040  | 283.5657 | 0.001105 | 0.513173 | 0.142176 | 3.60942   | 0.000359 | 0.062717 | 1 |
| ENSG00000242294.2   | TREATTXTPF-00547659 225mg | Week12 | STAG3L5P   | pseudogene           | chr7  | 99933702  | 99949523 +  |  | 2804  | 169.4287 | 0.003315 | 0.505947 | 0.140182 | 3.609206  | 0.00036  | 0.062717 | 1 |
| ENSG00000105662.11  | TREATTXTPF-00547659 225mg | Week12 | CRTC1      | protein_coding       | chr19 | 18794487  | 18893004 +  |  | 6826  | 1364.615 | 0        | 0.279925 | 0.077602 | 3.607175  | 0.000362 | 0.062975 | 1 |
| ENSG00000178104.15  | TREATTXTPF-00547659 225mg | Week12 | PDE4DIP    | protein_coding       | chr1  | 144836157 | 145076186 + |  | 28338 | 1778.146 | 0        | 0.343363 | 0.095191 | 3.607102  | 0.000363 | 0.062975 | 1 |
| ENSG00000265148.1   | TREATTXTPF-00547659 225mg | Week12 | BZRAP1-A'  | antisense            | chr17 | 56402811  | 56493127 +  |  | 3601  | 1701.136 | 0        | 0.28176  | 0.078128 | 3.606404  | 0.000364 | 0.063022 | 1 |
| ENSG00000198932.8   | TREATTXTPF-00547659 225mg | Week12 | GPRASP1    | protein_coding       | chrX  | 101906294 | 101914011 + |  | 6340  | 577.0055 | 0.001105 | 0.556549 | 0.154354 | 3.605668  | 0.000365 | 0.063078 | 1 |
| ENSG00000006744.14  | TREATTXTPF-00547659 225mg | Week12 | ELAC2      | protein_coding       | chr17 | 12895708  | 12921504 -  |  | 6345  | 1834.75  | 0        | 0.26697  | 0.074063 | 3.60465   | 0.000366 | 0.063089 | 1 |
| ENSG00000269834.1   | TREATTXTPF-00547659 225mg | Week12 | CTD-3018G  | processed_transcript | chr19 | 52892095  | 52901019 -  |  | 4160  | 75.29613 | 0.00663  | 0.598596 | 0.16607  | 3.604481  | 0.000366 | 0.063089 | 1 |
| ENSG00000103248.13  | TREATTXTPF-00547659 225mg | Week12 | MTHFSD     | protein_coding       | chr16 | 86563782  | 86588841 -  |  | 5350  | 755.6099 | 0        | 0.202499 | 0.056196 | 3.603443  | 0.000368 | 0.063089 | 1 |
| ENSG00000144554.6   | TREATTXTPF-00547659 225mg | Week12 | FANCD2     | protein_coding       | chr3  | 10068098  | 10143614 +  |  | 8378  | 757.4663 | 0        | 0.294023 | 0.081653 | 3.600898  | 0.000371 | 0.063089 | 1 |
| ENSG00000230487.3   | TREATTXTPF-00547659 225mg | Week12 | PSMG3-A5   | lincRNA              | chr7  | 1609709   | 1629262 +   |  | 6264  | 308.9613 | 0.001105 | 0.312143 | 0.086706 | 3.600023  | 0.000372 | 0.063089 | 1 |
| ENSG00000125741.4   | TREATTXTPF-00547659 225mg | Week12 | OPA3       | protein_coding       | chr19 | 46030685  | 46105470 -  |  | 9999  | 945.1061 | 0        | 0.251234 | 0.06979  | 3.599881  | 0.000372 | 0.063089 | 1 |
| ENSG00000135473.10  | TREATTXTPF-00547659 225mg | Week12 | PAN2       | protein_coding       | chr12 | 56710007  | 56727837 -  |  | 7288  | 1466.224 | 0        | 0.347981 | 0.096666 | 3.599841  | 0.000372 | 0.063089 | 1 |
| ENSG00000166886.8   | TREATTXTPF-00547659 225mg | Week12 | NAB2       | protein_coding       | chr12 | 57482677  | 57489259 +  |  | 3010  | 397.2862 | 0        | 0.340105 | 0.094481 | 3.599705  | 0.000373 | 0.063089 | 1 |
| ENSG00000091972.14  | TREATTXTPF-00547659 225mg | Week12 | CD200      | protein_coding       | chr3  | 112051194 | 112081659 + |  | 2991  | 163.7856 | 0.00663  | 0.577551 | 0.160448 | 3.599611  | 0.000373 | 0.063089 | 1 |
| ENSG00000189339.7   | TREATTXTPF-00547659 225mg | Week12 | SLC35E2B   | protein_coding       | chr1  | 1592939   | 1624167 -   |  | 7790  | 4681.09  | 0        | 0.283957 | 0.078887 | 3.599555  | 0.000373 | 0.063089 | 1 |
| ENSG00000125386.10  | TREATTXTPF-00547659 225mg | Week12 | FAM193A    | protein_coding       | chr4  | 2626988   | 2734292 +   |  | 6174  | 2054.021 | 0        | 0.182132 | 0.0506   | 3.599435  | 0.000373 | 0.063089 | 1 |
| ENSG00000136878.8   | TREATTXTPF-00547659 225mg | Week12 | USP20      | protein_coding       | chr9  | 132596977 | 132644107 + |  | 5511  | 3516.34  | 0        | 0.233529 | 0.064885 | 3.599116  | 0.000373 | 0.063089 | 1 |
| ENSG00000187953.6   | TREATTXTPF-00547659 225mg | Week12 | PMS2CL     | pseudogene           | chr7  | 6749759   | 6793493 +   |  | 3879  | 287.0597 | 0.001105 | 0.357531 | 0.09935  | 3.598705  | 0.000374 | 0.063089 | 1 |
| ENSG00000111371.11  | TREATTXTPF-00547659 225mg | Week12 | SLC38A1    | protein_coding       | chr12 | 46576846  | 46663800 -  |  | 10013 | 5591.908 | 0        | 0.461402 | 0.128225 | 3.598383  | 0.000374 | 0.063089 | 1 |
| ENSG00000145911.5   | TREATTXTPF-00547659 225mg | Week12 | N4BP3      | protein_coding       | chr5  | 177540444 | 177553088 + |  | 6080  | 231.6309 | 0.001105 | 0.473657 | 0.131657 | 3.597669  | 0.000375 | 0.063089 | 1 |
| ENSG00000102226.5   | TREATTXTPF-00547659 225mg | Week12 | USP11      | protein_coding       | chrX  | 47092089  | 47107727 +  |  | 5269  | 1909.251 | 0        | 0.274146 | 0.076203 | 3.597582  | 0.000376 | 0.063089 | 1 |
| ENSG00000174282.7   | TREATTXTPF-00547659 225mg | Week12 | ZBTB4      | protein_coding       | chr17 | 7362685   | 7387582 -   |  | 6026  | 4065.606 | 0        | 0.318739 | 0.088621 | 3.596672  | 0.000377 | 0.063089 | 1 |
| ENSG00000140521.7   | TREATTXTPF-00547659 225mg | Week12 | POLG       | protein_coding       | chr15 | 89859534  | 89878092 -  |  | 5529  | 4051.883 | 0        | 0.206958 | 0.057545 | 3.596469  | 0.000377 | 0.063089 | 1 |
| ENSG00000074966.6   | TREATTXTPF-00547659 225mg | Week12 | TXK        | protein_coding       | chr4  | 48068410  | 48136273 -  |  | 3472  | 963.411  | 0.001105 | 0.462921 | 0.12872  | 3.596347  | 0.000377 | 0.063089 | 1 |
| ENSG00000084092.6   | TREATTXTPF-00547659 225mg | Week12 | NOA1       | protein_coding       | chr4  | 57829536  | 57844989 -  |  | 3415  | 1318.06  | 0        | 0.238443 | 0.066315 | 3.595636  | 0.000378 | 0.063089 | 1 |
| ENSG00000174652.13  | TREATTXTPF-00547659 225mg | Week12 | ZNF266     | protein_coding       | chr19 | 9523272   | 9546254 -   |  | 5269  | 2863.263 | 0        | 0.344799 | 0.095916 | 3.594783  | 0.000379 | 0.063089 | 1 |
| ENSG00000141994.11  | TREATTXTPF-00547659 225mg | Week12 | DUS3L      | protein_coding       | chr19 | 5784843   | 5791249 -   |  | 3642  | 747.1878 | 0        | 0.299652 | 0.083362 | 3.594565  | 0.00038  | 0.063089 | 1 |
| ENSG00000184640.13  | TREATTXTPF-00547659 225mg | Week12 | 09-Sep     | protein_coding       | chr17 | 75276651  | 75496678 +  |  | 12844 | 28057.55 | 0        | 0.250705 | 0.069748 | 3.594465  | 0.00038  | 0.063089 | 1 |
| ENSG00000166436.11  | TREATTXTPF-00547659 225mg | Week12 | TRIM66     | protein_coding       | chr11 | 8633584   | 8693413 -   |  | 10816 | 920.9127 | 0        | 0.348265 | 0.096924 | 3.593162  | 0.000382 | 0.063281 | 1 |
| ENSG00000124571.13  | TREATTXTPF-00547659 225mg | Week12 | XPO5       | protein_coding       | chr6  | 43490072  | 43543812 -  |  | 8517  | 1304.108 | 0        | 0.2884   | 0.080283 | 3.592297  | 0.000383 | 0.063304 | 1 |
| ENSG00000137054.11  | TREATTXTPF-00547659 225mg | Week12 | POLR1E     | protein_coding       | chr9  | 37485932  | 37503694 +  |  | 2512  | 668.8597 | 0        | 0.324406 | 0.09031  | 3.592117  | 0.000383 | 0.063304 | 1 |
| ENSG00000198218.6   | TREATTXTPF-00547659 225mg | Week12 | QRICH1     | protein_coding       | chr3  | 49067140  | 49131796 -  |  | 5499  | 4086.13  | 0        | 0.238618 | 0.066463 | 3.590263  | 0.000386 | 0.06334  | 1 |
| ENSG00000197859.5   | TREATTXTPF-00547659 225mg | Week12 | ADAMTSL1   | protein_coding       | chr9  | 136397286 | 136440641 + |  | 4677  | 10.70166 | 0.146961 | 0.614556 | 0.171191 | 3.589877  | 0.000386 | 0.06334  | 1 |
| ENSG00000261474.1   | TREATTXTPF-00547659 225mg | Week12 | RP11-452L1 | lincRNA              | chr16 | 31460856  | 31464814 -  |  | 449   | 70.21105 | 0.001105 | 0.417679 | 0.116351 | 3.589833  | 0.000386 | 0.06334  | 1 |
| ENSG00000169992.5   | TREATTXTPF-00547659 225mg | Week12 | NLGN2      | protein_coding       | chr17 | 7308193   | 7323179 +   |  | 5550  | 138.8696 | 0.003315 | 0.496927 | 0.138432 | 3.589691  | 0.000387 | 0.06334  | 1 |
| ENSG00000166313.14  | TREATTXTPF-00547659 225mg | Week12 | APBB1      | protein_coding       | chr11 | 6416355   | 6440644 -   |  | 5194  | 1771.013 | 0        | 0.367022 | 0.102261 | 3.589064  | 0.000387 | 0.06334  | 1 |
| ENSG00000204930.5   | TREATTXTPF-00547659 225mg | Week12 | FAM221B    | protein_coding       | chr9  | 35816388  | 35828744 -  |  | 3941  | 5.98011  | 0.311602 | 0.62758  | 0.17491  | 3.588006  | 0.000389 | 0.06334  | 1 |
| ENSG00000189051.5   | TREATTXTPF-00547659 225mg | Week12 | RNF222     | protein_coding       | chr17 | 8294022   | 8301144 -   |  | 3070  | 5.38674  | 0.220994 | 0.525706 | 0.14653  | 3.587712  | 0.000389 | 0.06334  | 1 |
| ENSG00000120314.14  | TREATTXTPF-00547659 225mg | Week12 | WDR55      | protein_coding       | chr5  | 140044261 | 140053709 + |  | 7675  | 2417.299 | 0        | 0.17207  | 0.047965 | 3.587369  | 0.00039  | 0.06     |   |

|                    |                           |        |           |                      |       |           |              |       |          |          |          |          |          |          |          |   |
|--------------------|---------------------------|--------|-----------|----------------------|-------|-----------|--------------|-------|----------|----------|----------|----------|----------|----------|----------|---|
| ENSG00000158526.7  | TREATTXTPF-00547659 225mg | Week12 | TSR2      | protein_coding       | chrX  | 54466834  | 54471920 +   | 1534  | 1214.487 | 0        | 0.24445  | 0.068144 | 3.587285 | 0.00039  | 0.06334  | 1 |
| ENSG00000100241.16 | TREATTXTPF-00547659 225mg | Week12 | SBF1      | protein_coding       | chr22 | 50883429  | 50913454 -   | 9442  | 8154.234 | 0        | 0.239246 | 0.066693 | 3.587264 | 0.00039  | 0.06334  | 1 |
| ENSG00000130684.9  | TREATTXTPF-00547659 225mg | Week12 | ZNF337    | protein_coding       | chr20 | 25654851  | 25677477 -   | 3823  | 1496.264 | 0        | 0.401545 | 0.111999 | 3.58525  | 0.000393 | 0.063701 | 1 |
| ENSG00000248508.2  | TREATTXTPF-00547659 225mg | Week12 | SRP14-AS1 | lincRNA              | chr15 | 40331512  | 40359491 +   | 2975  | 160.0785 | 0.001105 | 0.39911  | 0.111378 | 3.583375 | 0.000396 | 0.06395  | 1 |
| ENSG00000070756.9  | TREATTXTPF-00547659 225mg | Week12 | PABPC1    | protein_coding       | chr8  | 101698044 | 101735037 +  | 4752  | 69281.36 | 0        | 0.254354 | 0.070986 | 3.583154 | 0.000396 | 0.06395  | 1 |
| ENSG00000130827.5  | TREATTXTPF-00547659 225mg | Week12 | PBXNA3    | protein_coding       | chrX  | 153686621 | 153701989 +  | 7577  | 585.7646 | 0        | 0.396523 | 0.110693 | 3.582182 | 0.000397 | 0.06395  | 1 |
| ENSG00000063322.9  | TREATTXTPF-00547659 225mg | Week12 | MED29     | protein_coding       | chr19 | 39881943  | 39891277 +   | 3835  | 2428.369 | 0        | 0.182126 | 0.050848 | 3.581797 | 0.000398 | 0.06395  | 1 |
| ENSG00000184178.11 | TREATTXTPF-00547659 225mg | Week12 | SCFD2     | protein_coding       | chr4  | 53739149  | 54232242 -   | 3176  | 503.6972 | 0        | 0.247765 | 0.06918  | 3.581472 | 0.000398 | 0.06395  | 1 |
| ENSG00000154358.15 | TREATTXTPF-00547659 225mg | Week12 | OBSCN     | protein_coding       | chr1  | 228395831 | 228566577 +  | 32207 | 1092.115 | 0        | 0.425198 | 0.118724 | 3.581408 | 0.000399 | 0.06395  | 1 |
| ENSG00000100207.14 | TREATTXTPF-00547659 225mg | Week12 | TCF20     | protein_coding       | chr22 | 42556019  | 42739622 -   | 7548  | 3037.487 | 0        | 0.264867 | 0.073966 | 3.580941 | 0.000399 | 0.063952 | 1 |
| ENSG00000113569.11 | TREATTXTPF-00547659 225mg | Week12 | NUP155    | protein_coding       | chr5  | 37288239  | 37371283 -   | 9233  | 757.2    | 0        | 0.331768 | 0.092693 | 3.579193 | 0.000402 | 0.063962 | 1 |
| ENSG00000182796.8  | TREATTXTPF-00547659 225mg | Week12 | TMEM198   | pseudogene           | chr12 | 56223529  | 56230030 +   | 3564  | 836.9624 | 0        | 0.286768 | 0.080131 | 3.578759 | 0.000402 | 0.063962 | 1 |
| ENSG00000196367.8  | TREATTXTPF-00547659 225mg | Week12 | TRRAP     | protein_coding       | chr7  | 98475556  | 98610866 +   | 13218 | 2465.804 | 0        | 0.319676 | 0.089348 | 3.577861 | 0.000404 | 0.063962 | 1 |
| ENSG00000188735.8  | TREATTXTPF-00547659 225mg | Week12 | TMEM120   | protein_coding       | chr12 | 122150658 | 122220907 +  | 8449  | 292.7006 | 0.001105 | 0.379677 | 0.106119 | 3.577854 | 0.000404 | 0.063962 | 1 |
| ENSG00000261087.1  | TREATTXTPF-00547659 225mg | Week12 | KB-1460A  | lincRNA              | chr8  | 102179033 | 1022181857 - | 2825  | 311.8961 | 0        | 0.344685 | 0.09634  | 3.57781  | 0.000404 | 0.063962 | 1 |
| ENSG00000163346.12 | TREATTXTPF-00547659 75mg  | Week12 | PBXIP1    | protein_coding       | chr1  | 154916552 | 154928599 -  | 3851  | 16790.48 | 0        | 0.232802 | 0.06507  | 3.577725 | 0.000404 | 0.063962 | 1 |
| ENSG00000118508.4  | TREATTXTPF-00547659 225mg | Week12 | RAB32     | protein_coding       | chr6  | 146864829 | 146876101 +  | 1217  | 2407.976 | 0        | -0.24907 | 0.069621 | -3.57756 | 0.000404 | 0.063962 | 1 |
| ENSG00000149136.3  | TREATTXTPF-00547659 225mg | Week12 | SSRP1     | protein_coding       | chr11 | 57093459  | 57103351 -   | 6323  | 3698.759 | 0        | 0.286514 | 0.080108 | 3.576613 | 0.000406 | 0.063962 | 1 |
| ENSG00000234616.4  | TREATTXTPF-00547659 225mg | Week12 | JRK       | processed_transcript | chr8  | 143738874 | 143763386 -  | 11234 | 1404.088 | 0        | 0.323613 | 0.090484 | 3.576464 | 0.000406 | 0.063962 | 1 |
| ENSG00000184939.11 | TREATTXTPF-00547659 225mg | Week12 | ZFP90     | protein_coding       | chr16 | 68563993  | 68609975 +   | 7015  | 1163.67  | 0        | 0.345239 | 0.096548 | 3.575833 | 0.000407 | 0.063962 | 1 |
| ENSG00000198793.8  | TREATTXTPF-00547659 225mg | Week12 | MTOR      | protein_coding       | chr1  | 11166592  | 11322564 -   | 12119 | 2245.817 | 0        | 0.287051 | 0.080288 | 3.575275 | 0.000408 | 0.063962 | 1 |
| ENSG00000063761.11 | TREATTXTPF-00547659 225mg | Week12 | ADCK1     | protein_coding       | chr14 | 78266426  | 78401355 +   | 5317  | 374.2707 | 0        | 0.299478 | 0.083765 | 3.575226 | 0.000408 | 0.063962 | 1 |
| ENSG00000122986.9  | TREATTXTPF-00547659 75mg  | Week12 | HVCN1     | protein_coding       | chr12 | 111065646 | 111142755 -  | 3595  | 4402.122 | 0        | 0.248503 | 0.069513 | 3.574922 | 0.000408 | 0.063962 | 1 |
| ENSG00000143093.10 | TREATTXTPF-00547659 225mg | Week12 | STRIP1    | protein_coding       | chr1  | 110574199 | 110617263 +  | 7352  | 2012.431 | 0        | 0.186362 | 0.052136 | 3.574523 | 0.000409 | 0.063962 | 1 |
| ENSG00000137221.10 | TREATTXTPF-00547659 225mg | Week12 | TJAP1     | protein_coding       | chr6  | 43445261  | 43474294 +   | 5655  | 1467.976 | 0        | 0.241322 | 0.067525 | 3.573808 | 0.00041  | 0.064004 | 1 |
| ENSG00000255991.2  | TREATTXTPF-00547659 225mg | Week12 | RP11-242  | pseudogene           | chr12 | 39860244  | 39861147 -   | 802   | 1.375691 | 0.675138 | 0.433602 | 0.12134  | 3.573445 | 0.00041  | 0.064004 | 1 |
| ENSG00000050426.11 | TREATTXTPF-00547659 225mg | Week12 | LETMD1    | protein_coding       | chr12 | 51441745  | 51454207 +   | 4400  | 1950.517 | 0        | 0.279607 | 0.078257 | 3.57291  | 0.000411 | 0.064024 | 1 |
| ENSG00000178035.7  | TREATTXTPF-00547659 225mg | Week12 | IMPDH2    | protein_coding       | chr3  | 49061758  | 49066841 -   | 2773  | 3019.197 | 0        | 0.265885 | 0.074435 | 3.572048 | 0.000412 | 0.064081 | 1 |
| ENSG00000110448.6  | TREATTXTPF-00547659 225mg | Week12 | CD5       | protein_coding       | chr11 | 60869867  | 60895324 +   | 3221  | 5431.571 | 0        | 0.380747 | 0.106599 | 3.571774 | 0.000413 | 0.064081 | 1 |
| ENSG00000162739.9  | TREATTXTPF-00547659 225mg | Week12 | SLAMF6    | protein_coding       | chr1  | 160454820 | 160493052 -  | 2746  | 3623.271 | 0        | 0.325498 | 0.091158 | 3.570686 | 0.000415 | 0.064123 | 1 |
| ENSG00000099910.12 | TREATTXTPF-00547659 225mg | Week12 | KLHL22    | protein_coding       | chr22 | 20783528  | 20850170 -   | 5112  | 1570.441 | 0        | 0.22523  | 0.063103 | 3.569255 | 0.000417 | 0.064123 | 1 |
| ENSG00000232098.2  | TREATTXTPF-00547659 225mg | Week12 | CTD-2619J | lincRNA              | chr19 | 58915605  | 58919851 -   | 3417  | 247.9414 | 0.001105 | 0.421326 | 0.118053 | 3.568949 | 0.000417 | 0.064123 | 1 |
| ENSG00000119242.4  | TREATTXTPF-00547659 75mg  | Week12 | CCDC92    | protein_coding       | chr12 | 124403207 | 124457378 -  | 6366  | 1746.396 | 0        | 0.240894 | 0.067503 | 3.56862  | 0.000418 | 0.064123 | 1 |
| ENSG00000012963.9  | TREATTXTPF-00547659 225mg | Week12 | UBR7      | protein_coding       | chr14 | 93673401  | 93695561 +   | 3694  | 1304.387 | 0        | 0.228408 | 0.064017 | 3.567954 | 0.000419 | 0.064123 | 1 |
| ENSG00000159164.5  | TREATTXTPF-00547659 225mg | Week12 | SV2A      | protein_coding       | chr1  | 149874870 | 149889434 -  | 4824  | 96.18785 | 0.001105 | 0.395531 | 0.110863 | 3.567731 | 0.000419 | 0.064123 | 1 |
| ENSG00000167978.12 | TREATTXTPF-00547659 225mg | Week12 | SRRM2     | protein_coding       | chr16 | 2802330   | 2822539 +    | 13266 | 30122.36 | 0        | 0.229639 | 0.064373 | 3.567311 | 0.00042  | 0.064123 | 1 |
| ENSG00000132478.5  | TREATTXTPF-00547659 225mg | Week12 | UNK       | protein_coding       | chr17 | 73780681  | 73821886 +   | 5699  | 1317.793 | 0        | 0.245873 | 0.068928 | 3.567095 | 0.00042  | 0.064123 | 1 |
| ENSG00000083454.17 | TREATTXTPF-00547659 225mg | Week12 | P2RX5     | protein_coding       | chr17 | 3575493   | 3599698 -    | 4190  | 970.4851 | 0        | 0.352313 | 0.09877  | 3.567006 | 0.00042  | 0.064123 | 1 |
| ENSG00000149716.8  | TREATTXTPF-00547659 225mg | Week12 | ORAOV1    | protein_coding       | chr11 | 69467844  | 69490184 -   | 7873  | 925.3724 | 0        | 0.269295 | 0.075499 | 3.566871 | 0.00042  | 0.064123 | 1 |
| ENSG00000102221.9  | TREATTXTPF-00547659 225mg | Week12 | PHF16     | protein_coding       | chrX  | 46771711  | 46920641 +   | 5134  | 90.43757 | 0.003315 | 0.412713 | 0.115723 | 3.566382 | 0.000421 | 0.064123 | 1 |
| ENSG00000165684.3  | TREATTXTPF-00547659 225mg | Week12 | SNAPC4    | protein_coding       | chr9  | 139270029 | 139293249 -  | 5010  | 806.0519 | 0        | 0.226687 | 0.063564 | 3.566278 | 0.000421 | 0.064123 | 1 |
| ENSG00000160299.12 | TREATTXTPF-00547659 225mg | Week12 | PCNT      | protein_coding       | chr21 | 47744036  | 47865682 +   | 11660 | 1427.033 | 0        | 0.270259 | 0.075808 | 3.565055 | 0.000423 | 0.06421  | 1 |
| ENSG00000136997.10 | TREATTXTPF-00547659 225mg | Week12 | MYC       | protein_coding       | chr8  | 128747680 | 128753674 +  | 2995  | 3174.204 | 0        | 0.345796 | 0.096997 | 3.565032 | 0.000423 | 0.06421  | 1 |
| ENSG00000110080.14 | TREATTXTPF-00547659 75mg  | Week12 | ST3GAL4   | protein_coding       | chr11 | 126225535 | 126310239 +  | 4462  | 2592.779 | 0        | -0.33614 | 0.094326 | -3.56364 | 0.000425 | 0.064436 | 1 |
| ENSG00000124574.10 | TREATTXTPF-00547659 225mg | Week12 | ABCC10    | protein_coding       | chr6  | 43395104  | 43418168 +   | 8083  | 1059.095 | 0        | 0.277387 | 0.077864 | 3.562446 | 0.000427 | 0.064613 | 1 |
| ENSG00000119689.10 | TREATTXTPF-00547659 225mg | Week12 | DLST      | protein_coding       | chr14 | 75348594  | 75370448 +   | 4550  | 3509.385 | 0        | 0.199003 | 0.055885 | 3.560941 | 0.00043  | 0.064784 | 1 |
| ENSG00000269609.1  | TREATTXTPF-00547659 225mg | Week12 | RP11-181  | processed_transcript | chr10 | 104209574 | 104220863 +  | 5660  | 873.7856 | 0        | 0.3504   | 0.098407 | 3.56073  | 0.00043  | 0.064784 | 1 |
| ENSG00000085465.11 | TREATTXTPF-00547659 225mg | Week12 | OVGP1     | protein_coding       | chr1  | 111956936 | 111970399 -  | 2988  | 165.8354 | 0.003315 | 0.566859 | 0.159211 | 3.560417 | 0.00043  | 0.064784 | 1 |
| ENSG00000128928.4  | TREATTXTPF-00547659 225mg | Week12 | IVD       | protein_coding       | chr15 | 40697686  | 40728146 +   | 6855  | 1879.224 | 0        | 0.262328 | 0.073712 | 3.558821 | 0.000433 | 0.064991 | 1 |
| ENSG00000120049.14 | TREATTXTPF-00547659 225mg | Week12 | KCNIP2    | protein_coding       | chr10 | 103585731 | 103603677 -  | 3294  | 113.1746 | 0.003315 | 0.461679 | 0.129733 | 3.558674 | 0.000433 | 0.064991 | 1 |
| ENSG00000211788.2  | TREATTXTPF-00547659 225mg | Week12 | TRAV13-1  | TR_V_gene            | chr14 | 22337020  | 22337546 +   | 360   | 281.547  | 0.001105 | 0.476757 | 0.134002 | 3.557847 | 0.000434 | 0.065085 | 1 |
| ENSG00000153944.6  | TREATTXTPF-00547659 225mg | Week12 | MSI2      | protein_coding       | chr17 | 55333212  | 55762046 +   | 21471 | 1672.818 | 0        | 0.312361 | 0.087828 | 3.556503 | 0.000437 | 0.065194 | 1 |
| ENSG00000145882.6  | TREATTXTPF-00547659 225mg | Week12 | PCYOX1L   | protein_coding       | chr5  | 148737570 | 148749216 +  | 6069  | 1182.212 | 0        | 0.3105   | 0.087315 | 3.556103 | 0.000437 | 0.065194 | 1 |

|                    |                           |        |           |                |       |           |             |       |          |          |          |          |          |          |          |   |
|--------------------|---------------------------|--------|-----------|----------------|-------|-----------|-------------|-------|----------|----------|----------|----------|----------|----------|----------|---|
| ENSG00000130653.11 | TREATTXTPF-00547659 225mg | Week12 | PNPLA7    | protein_coding | chr9  | 140354404 | 140444986 - | 8971  | 246.6122 | 0        | 0.425985 | 0.119884 | 3.553296 | 0.000442 | 0.065194 | 1 |
| ENSG00000157570.7  | TREATTXTPF-00547659 75mg  | Week12 | TSPAN18   | protein_coding | chr11 | 44748015  | 44953972 +  | 5871  | 1306.876 | 0        | 0.344919 | 0.097071 | 3.553257 | 0.000442 | 0.065194 | 1 |
| ENSG00000119397.12 | TREATTXTPF-00547659 225mg | Week12 | CNTRL     | protein_coding | chr9  | 123837141 | 123939888 + | 9417  | 2732.552 | 0        | 0.339561 | 0.095568 | 3.553099 | 0.000442 | 0.065194 | 1 |
| ENSG00000110514.14 | TREATTXTPF-00547659 225mg | Week12 | MADD      | protein_coding | chr11 | 47290712  | 47351582 +  | 8353  | 3986.341 | 0        | 0.244099 | 0.068706 | 3.552837 | 0.000442 | 0.065194 | 1 |
| ENSG00000104490.13 | TREATTXTPF-00547659 75mg  | Week12 | NCALD     | protein_coding | chr8  | 102698771 | 103137135 - | 8042  | 728.3823 | 0        | 0.362756 | 0.102104 | 3.552805 | 0.000443 | 0.065194 | 1 |
| ENSG0000020633.14  | TREATTXTPF-00547659 75mg  | Week12 | RUNX3     | protein_coding | chr1  | 25226002  | 25291612 -  | 4605  | 779.427  | 0        | 0.323636 | 0.091099 | 3.552577 | 0.000443 | 0.065194 | 1 |
| ENSG00000115568.11 | TREATTXTPF-00547659 225mg | Week12 | ZNF142    | protein_coding | chr2  | 219502639 | 219524378 - | 6982  | 1188.52  | 0        | 0.275887 | 0.077659 | 3.55254  | 0.000443 | 0.065194 | 1 |
| ENSG00000097007.13 | TREATTXTPF-00547659 225mg | Week12 | ABL1      | protein_coding | chr9  | 133589333 | 133763062 + | 6276  | 1370.726 | 0        | 0.28138  | 0.079209 | 3.552381 | 0.000443 | 0.065194 | 1 |
| ENSG00000189350.8  | TREATTXTPF-00547659 75mg  | Week12 | FAM179A   | protein_coding | chr2  | 29179477  | 29284239 +  | 19816 | 263.6354 | 0        | 0.373342 | 0.105096 | 3.552371 | 0.000443 | 0.065194 | 1 |
| ENSG00000171824.9  | TREATTXTPF-00547659 225mg | Week12 | EXOSC10   | protein_coding | chr1  | 11126675  | 11159938 -  | 6003  | 2378.147 | 0        | 0.260055 | 0.073214 | 3.551991 | 0.000444 | 0.065194 | 1 |
| ENSG00000247679.2  | TREATTXTPF-00547659 225mg | Week12 | RP11-1277 | antisense      | chr5  | 177038254 | 177046755 + | 1751  | 70.08508 | 0.003315 | 0.411556 | 0.115879 | 3.551613 | 0.000444 | 0.065194 | 1 |
| ENSG00000099991.12 | TREATTXTPF-00547659 75mg  | Week12 | CABIN1    | protein_coding | chr22 | 24407642  | 24574596 +  | 9388  | 7596.905 | 0        | 0.245618 | 0.069167 | 3.551115 | 0.000445 | 0.065194 | 1 |
| ENSG00000164048.9  | TREATTXTPF-00547659 225mg | Week12 | ZNF589    | protein_coding | chr3  | 48282590  | 48340743 +  | 5521  | 1493.043 | 0        | 0.303192 | 0.085403 | 3.550112 | 0.000447 | 0.065194 | 1 |
| ENSG00000214900.4  | TREATTXTPF-00547659 225mg | Week12 | C14orf182 | protein_coding | chr14 | 50448430  | 504474238 - | 7061  | 198.3127 | 0        | 0.411429 | 0.115902 | 3.549791 | 0.000447 | 0.065194 | 1 |
| ENSG00000154217.10 | TREATTXTPF-00547659 75mg  | Week12 | PITPNC1   | protein_coding | chr17 | 65373575  | 65693372 +  | 7642  | 2764.113 | 0        | 0.189841 | 0.053488 | 3.549216 | 0.000448 | 0.065194 | 1 |
| ENSG00000163872.11 | TREATTXTPF-00547659 225mg | Week12 | YEATS2    | protein_coding | chr3  | 183415606 | 183530413 + | 10212 | 1522.587 | 0        | 0.270975 | 0.076351 | 3.549081 | 0.000449 | 0.065194 | 1 |
| ENSG00000048471.9  | TREATTXTPF-00547659 225mg | Week12 | SNX29     | protein_coding | chr16 | 12070594  | 12668146 +  | 11298 | 1927.803 | 0        | 0.266691 | 0.075147 | 3.548912 | 0.000449 | 0.065194 | 1 |
| ENSG00000065183.11 | TREATTXTPF-00547659 225mg | Week12 | WDR3      | protein_coding | chr1  | 118472343 | 118509165 + | 10275 | 953.3149 | 0        | 0.373626 | 0.105297 | 3.548316 | 0.00045  | 0.065194 | 1 |
| ENSG00000244486.3  | TREATTXTPF-00547659 225mg | Week12 | SCARF2    | protein_coding | chr22 | 20778874  | 20792146 -  | 3602  | 102.6331 | 0.001105 | 0.358959 | 0.101175 | 3.547894 | 0.00045  | 0.065194 | 1 |
| ENSG00000009954.6  | TREATTXTPF-00547659 225mg | Week12 | BAZ1B     | protein_coding | chr7  | 72854728  | 72936608 -  | 7053  | 3046.681 | 0        | 0.289487 | 0.081597 | 3.547743 | 0.000451 | 0.065194 | 1 |
| ENSG00000152022.7  | TREATTXTPF-00547659 225mg | Week12 | LIX1L     | protein_coding | chr1  | 145477085 | 145501669 + | 3979  | 2339.228 | 0        | 0.220713 | 0.062216 | 3.547498 | 0.000451 | 0.065194 | 1 |
| ENSG00000166526.12 | TREATTXTPF-00547659 225mg | Week12 | ZNF3      | protein_coding | chr7  | 99661656  | 99680171 -  | 5420  | 1089.143 | 0        | 0.256202 | 0.072237 | 3.546704 | 0.000452 | 0.065194 | 1 |
| ENSG00000119431.5  | TREATTXTPF-00547659 225mg | Week12 | HDHD3     | protein_coding | chr9  | 116135699 | 116139279 - | 2105  | 555.4177 | 0        | 0.315296 | 0.088915 | 3.546042 | 0.000454 | 0.065194 | 1 |
| ENSG00000272325.1  | TREATTXTPF-00547659 225mg | Week12 | NUDT3     | protein_coding | chr6  | 34247456  | 34360451 -  | 9905  | 5940.338 | 0        | 0.204356 | 0.057631 | 3.545903 | 0.000454 | 0.065194 | 1 |
| ENSG00000120029.8  | TREATTXTPF-00547659 225mg | Week12 | C10orf76  | protein_coding | chr10 | 103605356 | 103815950 - | 4747  | 1485.906 | 0        | 0.221798 | 0.062555 | 3.545626 | 0.000454 | 0.065194 | 1 |
| ENSG00000130826.11 | TREATTXTPF-00547659 225mg | Week12 | DKC1      | protein_coding | chrX  | 153991031 | 154005964 + | 4189  | 1554.178 | 0        | 0.272698 | 0.076932 | 3.544644 | 0.000456 | 0.065194 | 1 |
| ENSG00000160613.8  | TREATTXTPF-00547659 225mg | Week12 | PCSK7     | protein_coding | chr11 | 117075053 | 117103241 - | 22303 | 5610.143 | 0        | 0.27087  | 0.076421 | 3.544443 | 0.000456 | 0.065194 | 1 |
| ENSG00000181638.13 | TREATTXTPF-00547659 225mg | Week12 | ZFP41     | protein_coding | chr8  | 144328991 | 144344875 + | 6910  | 200.8022 | 0.00221  | 0.334304 | 0.094319 | 3.544392 | 0.000456 | 0.065194 | 1 |
| ENSG00000113048.12 | TREATTXTPF-00547659 225mg | Week12 | MRPS27    | protein_coding | chr5  | 71515236  | 71616473 -  | 6511  | 1821.598 | 0        | 0.277969 | 0.07843  | 3.544175 | 0.000457 | 0.065194 | 1 |
| ENSG00000130348.7  | TREATTXTPF-00547659 225mg | Week12 | QRSL1     | protein_coding | chr6  | 107077453 | 107116292 + | 5453  | 714.8497 | 0        | 0.324877 | 0.091686 | 3.543369 | 0.000458 | 0.065194 | 1 |
| ENSG00000007923.11 | TREATTXTPF-00547659 225mg | Week12 | DNAJC11   | protein_coding | chr1  | 6694228   | 6761984 -   | 5147  | 1314.255 | 0        | 0.267685 | 0.075547 | 3.543298 | 0.000458 | 0.065194 | 1 |
| ENSG00000167721.6  | TREATTXTPF-00547659 225mg | Week12 | TSR1      | protein_coding | chr17 | 2225797   | 2240801 -   | 5545  | 1049.475 | 0        | 0.291249 | 0.082203 | 3.543033 | 0.000459 | 0.065194 | 1 |
| ENSG00000249898.3  | TREATTXTPF-00547659 225mg | Week12 | CTD-2541f | antisense      | chr8  | 6475996   | 6565730 -   | 3046  | 18.6895  | 0.023204 | 0.520712 | 0.147039 | 3.541311 | 0.000461 | 0.065349 | 1 |
| ENSG00000159433.7  | TREATTXTPF-00547659 225mg | Week12 | STAR9D9   | protein_coding | chr15 | 42867857  | 43013179 +  | 20706 | 311.4497 | 0        | 0.477005 | 0.134704 | 3.54113  | 0.000462 | 0.065349 | 1 |
| ENSG00000178802.13 | TREATTXTPF-00547659 225mg | Week12 | MPI       | protein_coding | chr15 | 75182346  | 75191798 +  | 6328  | 1193.902 | 0        | 0.304825 | 0.08609  | 3.540753 | 0.000462 | 0.065349 | 1 |
| ENSG00000135414.5  | TREATTXTPF-00547659 225mg | Week12 | GDF11     | protein_coding | chr12 | 56137064  | 56150911 +  | 3846  | 304.6243 | 0        | 0.358998 | 0.101391 | 3.540735 | 0.000462 | 0.065349 | 1 |
| ENSG00000103489.7  | TREATTXTPF-00547659 225mg | Week12 | XYLT1     | protein_coding | chr16 | 17195626  | 17564738 -  | 11004 | 1707.814 | 0        | 0.335345 | 0.094723 | 3.540253 | 0.000463 | 0.065366 | 1 |
| ENSG00000158859.9  | TREATTXTPF-00547659 225mg | Week12 | ADAMTS4   | protein_coding | chr1  | 161154098 | 161168846 - | 10334 | 42.65635 | 0.012155 | 0.556209 | 0.157191 | 3.538438 | 0.000466 | 0.065617 | 1 |
| ENSG00000143393.12 | TREATTXTPF-00547659 225mg | Week12 | PI4KB     | protein_coding | chr1  | 151264273 | 151300191 - | 5456  | 5158.749 | 0        | 0.140419 | 0.039684 | 3.538382 | 0.000466 | 0.065617 | 1 |
| ENSG00000111602.7  | TREATTXTPF-00547659 225mg | Week12 | TIMELESS  | protein_coding | chr12 | 56810903  | 56843187 -  | 5072  | 460.5702 | 0        | 0.328076 | 0.092761 | 3.536795 | 0.000469 | 0.065881 | 1 |
| ENSG00000196440.7  | TREATTXTPF-00547659 225mg | Week12 | ARMCX4    | protein_coding | chrX  | 100673275 | 100788446 + | 13347 | 146.8265 | 0.001105 | 0.424966 | 0.120167 | 3.536463 | 0.00047  | 0.065881 | 1 |
| ENSG00000100307.8  | TREATTXTPF-00547659 225mg | Week12 | CBX7      | protein_coding | chr22 | 39516172  | 39548679 -  | 7461  | 6202.866 | 0        | 0.232638 | 0.06579  | 3.536054 | 0.00047  | 0.065881 | 1 |
| ENSG00000070047.7  | TREATTXTPF-00547659 225mg | Week12 | PHRF1     | protein_coding | chr11 | 576486    | 612222 +    | 5769  | 2757.961 | 0        | 0.241802 | 0.068397 | 3.535269 | 0.000472 | 0.065972 | 1 |
| ENSG00000142208.11 | TREATTXTPF-00547659 75mg  | Week12 | AKT1      | protein_coding | chr14 | 105235686 | 105262088 + | 10838 | 9398.474 | 0        | 0.165624 | 0.046864 | 3.534129 | 0.000474 | 0.066072 | 1 |
| ENSG00000186918.9  | TREATTXTPF-00547659 225mg | Week12 | ZNF395    | protein_coding | chr8  | 28203102  | 28260218 -  | 5819  | 1278.994 | 0        | 0.327425 | 0.092665 | 3.533441 | 0.000475 | 0.066072 | 1 |
| ENSG00000196092.8  | TREATTXTPF-00547659 225mg | Week12 | PAX5      | protein_coding | chr9  | 36833272  | 37034103 -  | 9254  | 1180.326 | 0        | 0.461174 | 0.130522 | 3.533305 | 0.000475 | 0.066072 | 1 |
| ENSG00000239959.4  | TREATTXTPF-00547659 225mg | Week12 | AFG3L1P   | pseudogene     | chr16 | 90038994  | 90068569 +  | 9532  | 938.5746 | 0        | 0.335356 | 0.094923 | 3.532935 | 0.000476 | 0.066072 | 1 |
| ENSG00000107185.8  | TREATTXTPF-00547659 225mg | Week12 | RGP1      | protein_coding | chr9  | 35749203  | 35758572 +  | 7180  | 1806.504 | 0        | 0.185087 | 0.052391 | 3.53283  | 0.000476 | 0.066072 | 1 |
| ENSG00000184428.8  | TREATTXTPF-00547659 225mg | Week12 | TOP1MT    | protein_coding | chr8  | 144386554 | 144442149 - | 6441  | 777.5481 | 0        | 0.30033  | 0.085036 | 3.531791 | 0.000478 | 0.066132 | 1 |
| ENSG00000120306.5  | TREATTXTPF-00547659 225mg | Week12 | CYSTM1    | protein_coding | chr5  | 139554227 | 139661637 + | 2183  | 3961.198 | 0        | -0.50113 | 0.141891 | -3.53177 | 0.000478 | 0.066132 | 1 |
| ENSG00000151136.10 | TREATTXTPF-00547659 75mg  | Week12 | BTBD11    | protein_coding | chr12 | 107712190 | 108053419 + | 7924  | 561.7801 | 0        | 0.33195  | 0.094006 | 3.531155 | 0.000479 | 0.066184 | 1 |
| ENSG00000095319.10 | TREATTXTPF-00547659 225mg | Week12 | NUP188    | protein_coding | chr9  | 131709978 | 131769375 + | 8041  | 1979.347 | 0        | 0.292527 | 0.082855 | 3.530589 | 0.00048  | 0.0662   | 1 |
| ENSG00000226396.1  | TREATTXTPF-00547659 225mg | Week12 | RPS14P3   | pseudogene     | chr1  | 19934608  | 19935062 +  | 455   | 61.43094 | 0.00442  | 0.425324 | 0.120492 | 3.529893 | 0.000481 | 0.0662   | 1 |

|                    |                           |        |           |                |       |           |             |       |          |          |          |          |          |          |          |   |
|--------------------|---------------------------|--------|-----------|----------------|-------|-----------|-------------|-------|----------|----------|----------|----------|----------|----------|----------|---|
| ENSG00000095585.12 | TREATTXTPF-00547659 225mg | Week12 | BLNK      | protein_coding | chr10 | 97951458  | 98031344 -  | 3706  | 495.3459 | 0.001105 | 0.407119 | 0.115335 | 3.529883 | 0.000481 | 0.0662   | 1 |
| ENSG00000124160.7  | TREATTXTPF-00547659 225mg | Week12 | NCOA5     | protein_coding | chr20 | 44689624  | 44718591 -  | 3220  | 2458.986 | 0        | 0.242707 | 0.068798 | 3.527832 | 0.000485 | 0.066458 | 1 |
| ENSG00000188807.8  | TREATTXTPF-00547659 225mg | Week12 | TMEM201   | protein_coding | chr1  | 9648932   | 9674935 +   | 7018  | 264.6398 | 0        | 0.324251 | 0.091916 | 3.527672 | 0.000485 | 0.066458 | 1 |
| ENSG00000058600.11 | TREATTXTPF-00547659 225mg | Week12 | POLR3E    | protein_coding | chr16 | 22308730  | 22346424 +  | 9454  | 1201.79  | 0        | 0.300167 | 0.085101 | 3.527195 | 0.000486 | 0.066458 | 1 |
| ENSG00000100721.6  | TREATTXTPF-00547659 75mg  | Week12 | TCL1A     | protein_coding | chr14 | 96176304  | 96180533 +  | 2236  | 1801.364 | 0.001105 | 0.502701 | 0.142527 | 3.527067 | 0.000486 | 0.066458 | 1 |
| ENSG00000145016.9  | TREATTXTPF-00547659 225mg | Week12 | KIAA0226  | protein_coding | chr3  | 197398264 | 197476598 - | 8613  | 2882.028 | 0        | 0.224546 | 0.063673 | 3.520568 | 0.000487 | 0.066458 | 1 |
| ENSG00000147044.16 | TREATTXTPF-00547659 225mg | Week12 | CASK      | protein_coding | chrX  | 41374187  | 41782716 -  | 10547 | 576.9138 | 0        | 0.356284 | 0.101035 | 3.526331 | 0.000487 | 0.066458 | 1 |
| ENSG00000125731.8  | TREATTXTPF-00547659 225mg | Week12 | SH2D3A    | protein_coding | chr19 | 6752171   | 6767599 -   | 5716  | 609.2519 | 0        | 0.36565  | 0.103706 | 3.525845 | 0.000488 | 0.066458 | 1 |
| ENSG00000130584.6  | TREATTXTPF-00547659 225mg | Week12 | ZBTB46    | protein_coding | chr20 | 62375019  | 62462597 -  | 5955  | 97.62304 | 0.003315 | 0.364315 | 0.103333 | 3.525628 | 0.000488 | 0.066458 | 1 |
| ENSG0000011784.2   | TREATTXTPF-00547659 75mg  | Week12 | TRAV10    | TR_V_gene      | chr14 | 22293636  | 22294239 +  | 379   | 60.69282 | 0.00884  | 0.556042 | 0.157764 | 3.524512 | 0.00049  | 0.066617 | 1 |
| ENSG00000142798.12 | TREATTXTPF-00547659 225mg | Week12 | HSPG2     | protein_coding | chr1  | 22148738  | 22263790 -  | 17694 | 104.126  | 0.001105 | 0.461372 | 0.130957 | 3.523071 | 0.000493 | 0.066617 | 1 |
| ENSG00000214331.4  | TREATTXTPF-00547659 225mg | Week12 | RP11-252/ | pseudogene     | chr16 | 74366300  | 74402138 -  | 3828  | 179.6077 | 0.00442  | 0.425151 | 0.120681 | 3.522928 | 0.000493 | 0.066617 | 1 |
| ENSG00000143851.11 | TREATTXTPF-00547659 75mg  | Week12 | PTPN7     | protein_coding | chr1  | 202116141 | 202130716 - | 5906  | 3324.515 | 0        | 0.233223 | 0.066204 | 3.522799 | 0.000493 | 0.066617 | 1 |
| ENSG00000242861.1  | TREATTXTPF-00547659 225mg | Week12 | RP11-285f | antisense      | chr1  | 226028584 | 226034223 - | 348   | 323.084  | 0.001105 | 0.350498 | 0.099499 | 3.522632 | 0.000494 | 0.066617 | 1 |
| ENSG00000176986.10 | TREATTXTPF-00547659 225mg | Week12 | SEC24C    | protein_coding | chr10 | 75504120  | 75531919 +  | 5363  | 7100.891 | 0        | 0.168741 | 0.047902 | 3.522602 | 0.000494 | 0.066617 | 1 |
| ENSG00000196436.7  | TREATTXTPF-00547659 225mg | Week12 | NPIPB15   | protein_coding | chr16 | 74411776  | 74425978 +  | 1428  | 135.3017 | 0.040884 | 0.544637 | 0.154654 | 3.52165  | 0.000496 | 0.066695 | 1 |
| ENSG00000123600.14 | TREATTXTPF-00547659 225mg | Week12 | METTL8    | protein_coding | chr2  | 172173919 | 172291312 - | 10070 | 397.3536 | 0.001105 | 0.458594 | 0.13026  | 3.520612 | 0.000497 | 0.066695 | 1 |
| ENSG00000136709.7  | TREATTXTPF-00547659 225mg | Week12 | WDR33     | protein_coding | chr2  | 128458596 | 128568761 - | 14580 | 3454.716 | 0        | 0.190795 | 0.054195 | 3.520539 | 0.000498 | 0.066695 | 1 |
| ENSG00000161267.7  | TREATTXTPF-00547659 225mg | Week12 | BDH1      | protein_coding | chr3  | 197236654 | 197300194 - | 9112  | 531.4044 | 0        | 0.338561 | 0.09617  | 3.520459 | 0.000498 | 0.066695 | 1 |
| ENSG00000187862.7  | TREATTXTPF-00547659 225mg | Week12 | TTC24     | protein_coding | chr1  | 156549519 | 156556562 + | 2829  | 113.6895 | 0.005525 | 0.602887 | 0.171278 | 3.519931 | 0.000499 | 0.066695 | 1 |
| ENSG00000198131.9  | TREATTXTPF-00547659 225mg | Week12 | ZNF544    | protein_coding | chr19 | 58739960  | 58788815 +  | 6953  | 546.0972 | 0        | 0.33326  | 0.094678 | 3.519931 | 0.000499 | 0.066695 | 1 |
| ENSG00000068654.11 | TREATTXTPF-00547659 225mg | Week12 | POLR1A    | protein_coding | chr2  | 86247339  | 86333278 -  | 13519 | 962.1967 | 0        | 0.315585 | 0.08967  | 3.519412 | 0.0005   | 0.066702 | 1 |
| ENSG00000143851.11 | TREATTXTPF-00547659 225mg | Week12 | PTPN7     | protein_coding | chr1  | 202116141 | 202130716 - | 5906  | 3324.515 | 0        | 0.239343 | 0.068012 | 3.519124 | 0.0005   | 0.066702 | 1 |
| ENSG00000103199.9  | TREATTXTPF-00547659 225mg | Week12 | ZNF500    | protein_coding | chr16 | 4798240   | 4817625 -   | 6465  | 517.2895 | 0        | 0.319146 | 0.090744 | 3.516993 | 0.000504 | 0.066927 | 1 |
| ENSG00000063127.11 | TREATTXTPF-00547659 225mg | Week12 | SLC6A16   | protein_coding | chr19 | 49792895  | 49828482 -  | 3599  | 205.8862 | 0.00221  | 0.291743 | 0.082953 | 3.516983 | 0.000504 | 0.066927 | 1 |
| ENSG00000010292.8  | TREATTXTPF-00547659 225mg | Week12 | NCAPD2    | protein_coding | chr12 | 6602522   | 6641121 +   | 6487  | 3115.244 | 0        | 0.23175  | 0.065899 | 3.516752 | 0.000504 | 0.066927 | 1 |
| ENSG00000136457.5  | TREATTXTPF-00547659 75mg  | Week12 | CHAD      | protein_coding | chr17 | 48541857  | 48546327 -  | 1802  | 56.0674  | 0.012155 | 0.599633 | 0.170513 | 3.516643 | 0.000505 | 0.066927 | 1 |
| ENSG00000261123.1  | TREATTXTPF-00547659 225mg | Week12 | RP11-304/ | sense_intronic | chr16 | 2144831   | 2147027 -   | 596   | 4.244199 | 0.318232 | 0.536043 | 0.152509 | 3.514831 | 0.000508 | 0.067103 | 1 |
| ENSG00000117222.9  | TREATTXTPF-00547659 225mg | Week12 | RBBP5     | protein_coding | chr1  | 205055270 | 205091143 - | 4404  | 1525.032 | 0        | 0.230353 | 0.065538 | 3.514781 | 0.000508 | 0.067103 | 1 |
| ENSG00000165733.7  | TREATTXTPF-00547659 225mg | Week12 | BMS1      | protein_coding | chr10 | 43278249  | 43330385 +  | 7753  | 158.4712 | 0        | 0.302293 | 0.086012 | 3.514567 | 0.000508 | 0.067103 | 1 |
| ENSG00000011376.5  | TREATTXTPF-00547659 225mg | Week12 | LARS2     | protein_coding | chr3  | 45429998  | 45590913 +  | 5393  | 506.7569 | 0        | 0.274385 | 0.078075 | 3.514372 | 0.000509 | 0.067103 | 1 |
| ENSG00000021355.8  | TREATTXTPF-00547659 75mg  | Week12 | SERPINB1  | protein_coding | chr6  | 2832566   | 2842240 -   | 3226  | 17420.22 | 0        | -0.2389  | 0.067989 | -3.51376 | 0.00051  | 0.067158 | 1 |
| ENSG00000142959.4  | TREATTXTPF-00547659 225mg | Week12 | BEST4     | protein_coding | chr1  | 45249257  | 45253377 -  | 2047  | 21.4895  | 0.023204 | 0.505142 | 0.143822 | 3.512274 | 0.000513 | 0.067312 | 1 |
| ENSG00000175662.13 | TREATTXTPF-00547659 225mg | Week12 | TOM1L2    | protein_coding | chr17 | 17746828  | 17875736 -  | 7860  | 2499.513 | 0        | 0.22943  | 0.065323 | 3.512259 | 0.000513 | 0.067312 | 1 |
| ENSG00000186575.13 | TREATTXTPF-00547659 225mg | Week12 | NF2       | protein_coding | chr22 | 29999545  | 30094587 +  | 7170  | 1478.755 | 0        | 0.254124 | 0.072363 | 3.511786 | 0.000514 | 0.067312 | 1 |
| ENSG00000112655.11 | TREATTXTPF-00547659 225mg | Week12 | PTK7      | protein_coding | chr6  | 43044006  | 43129457 +  | 9024  | 116.9978 | 0.003315 | 0.353508 | 0.100681 | 3.511183 | 0.000515 | 0.067312 | 1 |
| ENSG00000147144.8  | TREATTXTPF-00547659 225mg | Week12 | CCDC120   | protein_coding | chrX  | 48911101  | 48927509 +  | 5439  | 304.7348 | 0        | 0.311502 | 0.088726 | 3.510836 | 0.000515 | 0.067312 | 1 |
| ENSG00000084652.11 | TREATTXTPF-00547659 225mg | Week12 | TXLNA     | protein_coding | chr1  | 32645287  | 32663886 +  | 5103  | 2883.801 | 0        | 0.260495 | 0.0742   | 3.510722 | 0.000516 | 0.067312 | 1 |
| ENSG00000183309.7  | TREATTXTPF-00547659 225mg | Week12 | ZNF623    | protein_coding | chr8  | 144718183 | 144735900 + | 4334  | 562.0552 | 0        | 0.371664 | 0.105874 | 3.510451 | 0.000516 | 0.067312 | 1 |
| ENSG00000060094.10 | TREATTXTPF-00547659 225mg | Week12 | ZNF362    | protein_coding | chr1  | 33722146  | 33766320 +  | 3331  | 805.5271 | 0        | 0.249263 | 0.071015 | 3.509985 | 0.000517 | 0.067333 | 1 |
| ENSG00000125651.9  | TREATTXTPF-00547659 225mg | Week12 | GTF2F1    | protein_coding | chr19 | 6379580   | 6393992 -   | 3134  | 3204.09  | 0        | 0.187369 | 0.053394 | 3.509208 | 0.000518 | 0.067351 | 1 |
| ENSG00000173581.3  | TREATTXTPF-00547659 225mg | Week12 | CCDC106   | protein_coding | chr19 | 56152428  | 56164527 +  | 2709  | 213.179  | 0.001105 | 0.349709 | 0.099656 | 3.509149 | 0.000518 | 0.067351 | 1 |
| ENSG00000105323.12 | TREATTXTPF-00547659 225mg | Week12 | HNRNPUL1  | protein_coding | chr19 | 41768401  | 41813503 +  | 6537  | 15458.83 | 0        | 0.174866 | 0.049841 | 3.50844  | 0.00052  | 0.06741  | 1 |
| ENSG00000120254.11 | TREATTXTPF-00547659 225mg | Week12 | MTHFD1L   | protein_coding | chr6  | 151186685 | 151423023 + | 4945  | 199.8122 | 0        | 0.33279  | 0.094877 | 3.507575 | 0.000521 | 0.06741  | 1 |
| ENSG00000188971.4  | TREATTXTPF-00547659 225mg | Week12 | RP11-427/ | lincRNA        | chr2  | 69685129  | 69693664 -  | 8536  | 2809.56  | 0        | 0.306852 | 0.087487 | 3.507392 | 0.000522 | 0.06741  | 1 |
| ENSG00000129521.9  | TREATTXTPF-00547659 75mg  | Week12 | EGLN3     | protein_coding | chr14 | 34393437  | 34931980 -  | 7359  | 125.3337 | 0.001105 | 0.352552 | 0.100526 | 3.507076 | 0.000522 | 0.06741  | 1 |
| ENSG00000140694.12 | TREATTXTPF-00547659 225mg | Week12 | PARN      | protein_coding | chr16 | 14529558  | 14726585 -  | 4382  | 1492.875 | 0        | 0.202788 | 0.057824 | 3.506953 | 0.000523 | 0.06741  | 1 |
| ENSG00000182240.11 | TREATTXTPF-00547659 225mg | Week12 | BACE2     | protein_coding | chr21 | 42539728  | 42654445 +  | 9619  | 483.7039 | 0        | 0.38024  | 0.108446 | 3.506278 | 0.000524 | 0.06741  | 1 |
| ENSG00000088387.13 | TREATTXTPF-00547659 225mg | Week12 | DOCK9     | protein_coding | chr13 | 99445741  | 99738879 -  | 10061 | 1222.471 | 0        | 0.479174 | 0.136662 | 3.506263 | 0.000524 | 0.06741  | 1 |
| ENSG00000132185.12 | TREATTXTPF-00547659 75mg  | Week12 | FCRLA     | protein_coding | chr1  | 161676762 | 161684142 + | 3275  | 1038.283 | 0        | 0.418264 | 0.119367 | 3.504002 | 0.000528 | 0.067699 | 1 |
| ENSG00000041880.10 | TREATTXTPF-00547659 225mg | Week12 | PARP3     | protein_coding | chr3  | 51976361  | 51982883 +  | 2928  | 394.9436 | 0.001105 | 0.321504 | 0.09176  | 3.503738 | 0.000529 | 0.067699 | 1 |
| ENSG00000204852.11 | TREATTXTPF-00547659 225mg | Week12 | TCTN1     | protein_coding | chr12 | 111051832 | 111087235 + | 9605  | 340.7171 | 0.00221  | 0.471085 | 0.134487 | 3.502838 | 0.00053  | 0.067699 | 1 |
| ENSG00000134202.6  | TREATTXTPF-00547659 75mg  | Week12 | GSTM3     | protein_coding | chr1  | 110276554 | 110284384 - | 4837  | 160.5514 | 0.003315 | 0.474503 | 0.135472 | 3.502585 | 0.000531 | 0.067699 | 1 |

|                    |                            |        |           |                      |       |           |             |       |          |          |          |          |          |          |          |   |
|--------------------|----------------------------|--------|-----------|----------------------|-------|-----------|-------------|-------|----------|----------|----------|----------|----------|----------|----------|---|
| ENSG00000103423.9  | TREATTXTPF-00547659 225mg  | Week12 | DNAJA3    | protein_coding       | chr16 | 4475806   | 4506776 +   | 7071  | 1283.856 | 0        | 0.311425 | 0.088927 | 3.502024 | 0.000532 | 0.067699 | 1 |
| ENSG00000133065.6  | TREATTXTPF-00547659 225mg  | Week12 | SLC41A1   | protein_coding       | chr1  | 205758221 | 205782876 - | 6357  | 772.7481 | 0        | 0.369519 | 0.10552  | 3.501901 | 0.000532 | 0.067699 | 1 |
| ENSG00000050327.10 | TREATTXTPF-00547659 225mg  | Week12 | ARHGFE5   | protein_coding       | chr7  | 144052381 | 144077725 + | 5818  | 84.22652 | 0.001105 | 0.358008 | 0.102235 | 3.501805 | 0.000532 | 0.067699 | 1 |
| ENSG00000165282.9  | TREATTXTPF-00547659 225mg  | Week12 | PIGO      | protein_coding       | chr9  | 35088685  | 35096591 -  | 7202  | 742.7403 | 0        | 0.263102 | 0.075136 | 3.501669 | 0.000533 | 0.067699 | 1 |
| ENSG00000106479.6  | TREATTXTPF-00547659 225mg  | Week12 | ZNF862    | protein_coding       | chr7  | 149535456 | 149564568 + | 8430  | 2051.457 | 0        | 0.277116 | 0.079144 | 3.50142  | 0.000533 | 0.067699 | 1 |
| ENSG00000100311.12 | TREATTXTPF-00547659 225mg  | Week12 | PDGFB     | protein_coding       | chr22 | 39619364  | 39640756 -  | 3761  | 179.5602 | 0        | 0.418166 | 0.119467 | 3.500274 | 0.000535 | 0.067699 | 1 |
| ENSG00000136504.7  | TREATTXTPF-00547659 225mg  | Week12 | KAT7      | protein_coding       | chr17 | 47865917  | 47906458 +  | 6085  | 2934.304 | 0        | 0.197992 | 0.056568 | 3.500044 | 0.000536 | 0.067699 | 1 |
| ENSG00000177051.5  | TREATTXTPF-00547659 225mg  | Week12 | FBXO46    | protein_coding       | chr19 | 46213887  | 46234162 -  | 3535  | 1443.629 | 0        | 0.197694 | 0.056487 | 3.499813 | 0.000536 | 0.067699 | 1 |
| ENSG00000174243.5  | TREATTXTPF-00547659 225mg  | Week12 | DDX23     | protein_coding       | chr12 | 49223547  | 49246625 -  | 5419  | 5129.129 | 0        | 0.17076  | 0.048797 | 3.499375 | 0.000537 | 0.067699 | 1 |
| ENSG00000215161.2  | TREATTXTPF-00547659 75mg   | Week12 | RP11-540C | lincRNA              | chr15 | 41199009  | 41201540 +  | 589   | 9.114917 | 0.058564 | 0.473802 | 0.135415 | 3.498892 | 0.000538 | 0.067699 | 1 |
| ENSG00000197928.6  | TREATTXTPF-00547659 225mg  | Week12 | ZNF677    | protein_coding       | chr19 | 53731577  | 53758151 -  | 14542 | 116.8829 | 0.005525 | 0.560091 | 0.160077 | 3.498887 | 0.000538 | 0.067699 | 1 |
| ENSG00000211746.3  | TREATTXTPF-00547659 225mg  | Week12 | TRBV19    | TR_V_gene            | chr7  | 142326363 | 142327046 + | 552   | 509.0199 | 0        | 0.411011 | 0.11747  | 3.498872 | 0.000538 | 0.067699 | 1 |
| ENSG00000140987.15 | TREATTXTPF-00547659 225mg  | Week12 | ZSCAN3    | protein_coding       | chr16 | 3432085   | 3451065 -   | 4009  | 1081.582 | 0        | 0.222521 | 0.0636   | 3.498751 | 0.000538 | 0.067699 | 1 |
| ENSG00000166398.8  | TREATTXTPF-00547659 225mg  | Week12 | KIAA0355  | protein_coding       | chr19 | 34745442  | 34846091 +  | 7459  | 1083.077 | 0        | 0.337025 | 0.096407 | 3.495849 | 0.000544 | 0.068144 | 1 |
| ENSG00000160007.13 | TREATTXTPF-00547659 225mg  | Week12 | ARHGAP3   | protein_coding       | chr19 | 47421933  | 47508334 +  | 11245 | 1556.098 | 0        | 0.256432 | 0.073358 | 3.495625 | 0.000544 | 0.068144 | 1 |
| ENSG00000232677.2  | TREATTXTPF-00547659 225mg  | Week12 | LINC00665 | lincRNA              | chr19 | 36803969  | 36822620 -  | 7201  | 169.0663 | 0.00221  | 0.438328 | 0.125431 | 3.494561 | 0.000546 | 0.068144 | 1 |
| ENSG00000174306.17 | TREATTXTPF-00547659 225mg  | Week12 | ZHX3      | protein_coding       | chr20 | 39807088  | 39946312 -  | 11621 | 371.526  | 0.001105 | 0.309405 | 0.08854  | 3.494514 | 0.000547 | 0.068144 | 1 |
| ENSG00000143434.11 | TREATTXTPF-00547659 75mg   | Week12 | SEMA6C    | protein_coding       | chr1  | 151104161 | 151119104 - | 5773  | 130.547  | 0        | 0.345051 | 0.09875  | 3.494173 | 0.000547 | 0.068144 | 1 |
| ENSG00000117461.10 | TREATTXTPF-00547659 75mg   | Week12 | PIK3R3    | protein_coding       | chr1  | 46505812  | 46642160 -  | 7676  | 177.737  | 0.001105 | 0.424177 | 0.121408 | 3.49381  | 0.000548 | 0.068144 | 1 |
| ENSG00000101407.8  | TREATTXTPF-00547659 225mg  | Week12 | TTI1      | protein_coding       | chr20 | 36611409  | 36661870 -  | 4122  | 1164.752 | 0        | 0.181244 | 0.05188  | 3.493535 | 0.000548 | 0.068144 | 1 |
| ENSG00000115053.11 | TREATTXTPF-00547659 225mg  | Week12 | NCL       | protein_coding       | chr2  | 232318242 | 232348352 - | 6929  | 11999.84 | 0        | 0.288612 | 0.08262  | 3.49326  | 0.000549 | 0.068144 | 1 |
| ENSG00000197948.6  | TREATTXTPF-00547659 225mg  | Week12 | FCHSD1    | protein_coding       | chr5  | 141018869 | 141030986 - | 6073  | 2942.761 | 0        | 0.171562 | 0.049115 | 3.493098 | 0.000549 | 0.068144 | 1 |
| ENSG00000100335.8  | TREATTXTPF-00547659 225mg  | Week12 | MIEF1     | protein_coding       | chr22 | 39895437  | 39914137 +  | 7555  | 1826.212 | 0        | 0.277799 | 0.079532 | 3.49291  | 0.00055  | 0.068144 | 1 |
| ENSG00000211724.3  | TREATTXTPF-00547659 225mg  | Week12 | TRBV6-6   | TR_V_gene            | chr7  | 142161931 | 142162407 - | 388   | 125.6287 | 0.00442  | 0.485569 | 0.139042 | 3.492249 | 0.000551 | 0.068144 | 1 |
| ENSG00000303122.14 | TREATTXTPF-00547659 225mg  | Week12 | LRRC7     | protein_coding       | chr1  | 70034081  | 70617628 +  | 14652 | 11.56906 | 0.246409 | 0.717737 | 0.205529 | 3.492148 | 0.000551 | 0.068144 | 1 |
| ENSG00000126251.5  | TREATTXTPF-00547659 22.5mg | Week12 | GPR42     | protein_coding       | chr19 | 35861831  | 35863855 +  | 1854  | 10.47514 | 0.145856 | -0.6505  | 0.186299 | -3.49169 | 0.000552 | 0.068144 | 1 |
| ENSG00000253701.1  | TREATTXTPF-00547659 75mg   | Week12 | AL928768  | lincRNA              | chr14 | 106170301 | 106170939 - | 359   | 215.6376 | 0.00221  | 0.503753 | 0.144285 | 3.491375 | 0.000553 | 0.068144 | 1 |
| ENSG00000261659.2  | TREATTXTPF-00547659 225mg  | Week12 | LA16c-313 | processed_transcript | chr16 | 739001    | 742554 +    | 3554  | 39.17127 | 0.007735 | 0.443475 | 0.12703  | 3.491099 | 0.000553 | 0.068144 | 1 |
| ENSG00000063046.13 | TREATTXTPF-00547659 225mg  | Week12 | EIF4B     | protein_coding       | chr12 | 53399942  | 53435993 +  | 6146  | 21851.47 | 0        | 0.265316 | 0.076007 | 3.490694 | 0.000554 | 0.068144 | 1 |
| ENSG00000149179.9  | TREATTXTPF-00547659 225mg  | Week12 | C11orf49  | protein_coding       | chr11 | 46958240  | 47185936 +  | 5671  | 374.979  | 0        | 0.28388  | 0.081341 | 3.490004 | 0.000555 | 0.068144 | 1 |
| ENSG00000182670.9  | TREATTXTPF-00547659 225mg  | Week12 | TTC3      | protein_coding       | chr21 | 38445526  | 38575413 +  | 15883 | 3594.893 | 0        | 0.365107 | 0.104616 | 3.489991 | 0.000556 | 0.068144 | 1 |
| ENSG00000253865.1  | TREATTXTPF-00547659 225mg  | Week12 | RP11-394A | antisense            | chr5  | 148751737 | 148754679 + | 588   | 24.94807 | 0.01547  | 0.524193 | 0.15022  | 3.489497 | 0.000556 | 0.068144 | 1 |
| ENSG00000245849.2  | TREATTXTPF-00547659 225mg  | Week12 | RAD51-AS  | processed_transcript | chr15 | 40978922  | 40987305 -  | 1696  | 442.3878 | 0.00221  | 0.455231 | 0.130466 | 3.489261 | 0.000557 | 0.068144 | 1 |
| ENSG00000166289.5  | TREATTXTPF-00547659 75mg   | Week12 | PLEKHF1   | protein_coding       | chr19 | 30155963  | 30166364 +  | 2681  | 972.747  | 0        | 0.365941 | 0.104879 | 3.489154 | 0.000557 | 0.068144 | 1 |
| ENSG00000056972.14 | TREATTXTPF-00547659 225mg  | Week12 | TRAF3IP2  | protein_coding       | chr6  | 111877657 | 111927481 - | 6553  | 619.4685 | 0        | 0.237717 | 0.068135 | 3.488936 | 0.000558 | 0.068144 | 1 |
| ENSG00000147454.9  | TREATTXTPF-00547659 225mg  | Week12 | SLC25A37  | protein_coding       | chr8  | 23386318  | 23432976 +  | 8147  | 65728.44 | 0        | -0.33072 | 0.094805 | -3.4884  | 0.000559 | 0.068188 | 1 |
| ENSG00000234184.1  | TREATTXTPF-00547659 75mg   | Week12 | RP5-887A  | lincRNA              | chr1  | 81001440  | 81112473 +  | 709   | 52.76133 | 0.01326  | 0.645527 | 0.185069 | 3.488041 | 0.000559 | 0.068188 | 1 |
| ENSG00000123405.9  | TREATTXTPF-00547659 225mg  | Week12 | NFE2      | protein_coding       | chr12 | 54685895  | 54694905 -  | 2469  | 23361.27 | 0        | -0.31546 | 0.090482 | -3.48644 | 0.000563 | 0.068494 | 1 |
| ENSG00000196535.10 | TREATTXTPF-00547659 225mg  | Week12 | MYO18A    | protein_coding       | chr17 | 27400528  | 27507430 -  | 10771 | 2136.67  | 0        | 0.306486 | 0.087932 | 3.485485 | 0.000565 | 0.06864  | 1 |
| ENSG00000140543.9  | TREATTXTPF-00547659 225mg  | Week12 | DET1      | protein_coding       | chr15 | 89054790  | 89099906 -  | 2658  | 186.8597 | 0.00221  | 0.322057 | 0.09241  | 3.485093 | 0.000565 | 0.068649 | 1 |
| ENSG00000225314.1  | TREATTXTPF-00547659 7.5mg  | Week12 | AC018634  | pseudogene           | chr7  | 37860812  | 37861212 +  | 401   | 3.096133 | 0.412155 | 0.495778 | 0.142326 | 3.483401 | 0.000569 | 0.068979 | 1 |
| ENSG00000116824.4  | TREATTXTPF-00547659 75mg   | Week12 | CD2       | protein_coding       | chr1  | 117297007 | 117311850 + | 1679  | 6772.929 | 0        | 0.332219 | 0.09541  | 3.482021 | 0.000572 | 0.069233 | 1 |
| ENSG00000163879.9  | TREATTXTPF-00547659 22.5mg | Week12 | DNALI1    | protein_coding       | chr1  | 38022520  | 38032458 +  | 4456  | 3.534807 | 0.379006 | 0.51696  | 0.148495 | 3.481331 | 0.000573 | 0.069269 | 1 |
| ENSG00000015133.14 | TREATTXTPF-00547659 225mg  | Week12 | CDC88C    | protein_coding       | chr14 | 91737667  | 91884188 -  | 12426 | 5976.85  | 0        | 0.306473 | 0.088051 | 3.480643 | 0.000574 | 0.069269 | 1 |
| ENSG00000154945.6  | TREATTXTPF-00547659 225mg  | Week12 | ANKRD40   | protein_coding       | chr17 | 48770551  | 48785285 -  | 4849  | 1265.292 | 0        | 0.303907 | 0.087316 | 3.480555 | 0.000575 | 0.069269 | 1 |
| ENSG00000171467.11 | TREATTXTPF-00547659 225mg  | Week12 | ZNF318    | protein_coding       | chr6  | 43274872  | 43337216 -  | 9559  | 1485.665 | 0        | 0.341229 | 0.098058 | 3.479851 | 0.000576 | 0.069269 | 1 |
| ENSG00000171606.13 | TREATTXTPF-00547659 225mg  | Week12 | ZNF274    | protein_coding       | chr19 | 58694396  | 58724928 +  | 8332  | 1560.497 | 0        | 0.256544 | 0.073729 | 3.479557 | 0.000577 | 0.069269 | 1 |
| ENSG00000065802.7  | TREATTXTPF-00547659 225mg  | Week12 | ASB1      | protein_coding       | chr2  | 239335383 | 239360891 + | 7410  | 1546.29  | 0        | 0.242958 | 0.069826 | 3.479455 | 0.000577 | 0.069269 | 1 |
| ENSG00000106624.4  | TREATTXTPF-00547659 225mg  | Week12 | AEBP1     | protein_coding       | chr7  | 44143960  | 44154161 +  | 4955  | 324.0972 | 0        | 0.402366 | 0.115645 | 3.479319 | 0.000577 | 0.069269 | 1 |
| ENSG00000204560.5  | TREATTXTPF-00547659 225mg  | Week12 | DHX16     | protein_coding       | chr6  | 30620896  | 30640814 -  | 4008  | 3036.454 | 0        | 0.147765 | 0.042473 | 3.47904  | 0.000578 | 0.069269 | 1 |
| ENSG00000121310.12 | TREATTXTPF-00547659 225mg  | Week12 | ECHDC2    | protein_coding       | chr1  | 53361656  | 53392884 -  | 11498 | 1649.181 | 0        | 0.368315 | 0.105882 | 3.478558 | 0.000579 | 0.069302 | 1 |
| ENSG00000126368.5  | TREATTXTPF-00547659 225mg  | Week12 | NR1D1     | protein_coding       | chr17 | 38249040  | 38256978 -  | 2772  | 525.5138 | 0        | 0.381754 | 0.109779 | 3.47747  | 0.000581 | 0.069425 | 1 |
| ENSG00000183092.11 | TREATTXTPF-00547659 225mg  | Week12 | BEGAIN    | protein_coding       | chr14 | 101003486 | 101053750 - | 7073  | 171.1503 | 0.00884  | 0.337554 | 0.097072 | 3.477357 | 0.000581 | 0.069425 | 1 |

|                    |                            |        |                          |       |           |             |       |          |          |          |          |          |          |          |   |
|--------------------|----------------------------|--------|--------------------------|-------|-----------|-------------|-------|----------|----------|----------|----------|----------|----------|----------|---|
| ENSG00000196199.9  | TREATTXTPF-00547659 225mg  | Week12 | MPHOSPH protein_coding   | chr13 | 20207788  | 20247599 +  | 4786  | 3493.062 | 0        | 0.220546 | 0.063444 | 3.476224 | 0.000584 | 0.069575 | 1 |
| ENSG00000188185.7  | TREATTXTPF-00547659 225mg  | Week12 | LINC00265 lincRNA        | chr7  | 39773231  | 39832691 +  | 3115  | 293.242  | 0.001105 | 0.403446 | 0.11607  | 3.475874 | 0.000584 | 0.069575 | 1 |
| ENSG0000013573.12  | TREATTXTPF-00547659 225mg  | Week12 | DDX11 protein_coding     | chr12 | 31226779  | 31257725 +  | 8374  | 696.926  | 0        | 0.345845 | 0.099535 | 3.474602 | 0.000587 | 0.069575 | 1 |
| ENSG00000081760.12 | TREATTXTPF-00547659 225mg  | Week12 | AACS protein_coding      | chr12 | 125549925 | 125627873 + | 16089 | 544.4994 | 0        | 0.25179  | 0.072468 | 3.474501 | 0.000587 | 0.069575 | 1 |
| ENSG00000260655.1  | TREATTXTPF-00547659 225mg  | Week12 | CTA-250D: lincRNA        | chr22 | 42318027  | 42319104 -  | 1078  | 471.958  | 0.001105 | 0.43243  | 0.124476 | 3.473999 | 0.000588 | 0.069575 | 1 |
| ENSG00000168778.7  | TREATTXTPF-00547659 225mg  | Week12 | TC2N2 protein_coding     | chr12 | 124155660 | 124192948 + | 5104  | 153.726  | 0        | 0.414761 | 0.119392 | 3.473933 | 0.000588 | 0.069575 | 1 |
| ENSG00000156502.9  | TREATTXTPF-00547659 225mg  | Week12 | SUPV3L1 protein_coding   | chr10 | 70939988  | 70968855 +  | 4283  | 740.5724 | 0        | 0.277172 | 0.079788 | 3.473872 | 0.000589 | 0.069575 | 1 |
| ENSG00000083812.7  | TREATTXTPF-00547659 225mg  | Week12 | ZNF324 protein_coding    | chr19 | 58978423  | 58984945 +  | 3795  | 410.1956 | 0        | 0.30144  | 0.086775 | 3.47379  | 0.000589 | 0.069575 | 1 |
| ENSG00000172992.7  | TREATTXTPF-00547659 225mg  | Week12 | DCAKD protein_coding     | chr17 | 43100708  | 43138473 +  | 2830  | 700.5547 | 0        | 0.258631 | 0.074463 | 3.473277 | 0.00059  | 0.069575 | 1 |
| ENSG00000172349.12 | TREATTXTPF-00547659 225mg  | Week12 | IL16 protein_coding      | chr15 | 81451916  | 81605104 +  | 10875 | 21669.99 | 0        | 0.150085 | 0.043215 | 3.472995 | 0.00059  | 0.069575 | 1 |
| ENSG00000196187.7  | TREATTXTPF-00547659 225mg  | Week12 | TMEM63A protein_coding   | chr1  | 226033237 | 226070069 - | 10339 | 5178.667 | 0        | 0.265422 | 0.076426 | 3.472915 | 0.000591 | 0.069575 | 1 |
| ENSG00000171084.11 | TREATTXTPF-00547659 225mg  | Week12 | FAM86JP pseudogene       | chr3  | 125635463 | 125648867 + | 2519  | 22.82099 | 0.029834 | 0.539245 | 0.15533  | 3.4716   | 0.000593 | 0.069706 | 1 |
| ENSG00000128833.8  | TREATTXTPF-00547659 225mg  | Week12 | MYO5C protein_coding     | chr15 | 52484519  | 52587995 -  | 10045 | 54.0663  | 0.009945 | 0.490341 | 0.141245 | 3.471555 | 0.000593 | 0.069706 | 1 |
| ENSG00000148297.11 | TREATTXTPF-00547659 225mg  | Week12 | MED22 protein_coding     | chr9  | 136205160 | 136214986 - | 7242  | 2394.4   | 0        | 0.163261 | 0.047031 | 3.47133  | 0.000594 | 0.069706 | 1 |
| ENSG00000188522.10 | TREATTXTPF-00547659 75mg   | Week12 | FAM83G protein_coding    | chr17 | 18872102  | 18908117 -  | 7883  | 374.6265 | 0        | 0.355424 | 0.102398 | 3.471006 | 0.000595 | 0.069706 | 1 |
| ENSG00000215193.8  | TREATTXTPF-00547659 225mg  | Week12 | PEX26 protein_coding     | chr22 | 18560689  | 18613905 +  | 20042 | 1713.094 | 0        | 0.251359 | 0.07243  | 3.470363 | 0.000596 | 0.06978  | 1 |
| ENSG00000126243.4  | TREATTXTPF-00547659 75mg   | Week12 | LRFN3 protein_coding     | chr19 | 36426260  | 36436669 +  | 4044  | 364.7481 | 0        | 0.396796 | 0.114413 | 3.468094 | 0.000601 | 0.070087 | 1 |
| ENSG00000177951.13 | TREATTXTPF-00547659 75mg   | Week12 | BET1L protein_coding     | chr11 | 167784    | 207428 -    | 3868  | 2363.464 | 0        | 0.194402 | 0.056055 | 3.468072 | 0.000601 | 0.070087 | 1 |
| ENSG00000184557.3  | TREATTXTPF-00547659 75mg   | Week12 | SOC53 protein_coding     | chr17 | 76352864  | 76356158 -  | 2729  | 4927.359 | 0        | -0.45305 | 0.130649 | -3.46773 | 0.000602 | 0.070087 | 1 |
| ENSG00000260188.1  | TREATTXTPF-00547659 225mg  | Week12 | CTA-331P: antisense      | chr6  | 110799110 | 110800639 + | 1530  | 28.77901 | 0.023204 | -0.58045 | 0.167386 | -3.46772 | 0.000602 | 0.070087 | 1 |
| ENSG00000085511.15 | TREATTXTPF-00547659 225mg  | Week12 | MAP3K4 protein_coding    | chr6  | 161412759 | 161538417 + | 7522  | 1379.751 | 0        | 0.311192 | 0.089754 | 3.467149 | 0.000603 | 0.070087 | 1 |
| ENSG00000135763.5  | TREATTXTPF-00547659 225mg  | Week12 | URB2 protein_coding      | chr1  | 229761981 | 229795946 + | 6001  | 341.9547 | 0.001105 | 0.339927 | 0.098044 | 3.467073 | 0.000603 | 0.070087 | 1 |
| ENSG00000112139.10 | TREATTXTPF-00547659 225mg  | Week12 | MDGA1 protein_coding     | chr6  | 37600284  | 37667082 -  | 12385 | 324.863  | 0.041989 | 0.500391 | 0.144348 | 3.46657  | 0.000604 | 0.070123 | 1 |
| ENSG00000103550.9  | TREATTXTPF-00547659 225mg  | Week12 | KNOP1 protein_coding     | chr16 | 19714902  | 19729557 -  | 6115  | 323.4354 | 0        | 0.319448 | 0.092177 | 3.465587 | 0.000606 | 0.070123 | 1 |
| ENSG00000162373.8  | TREATTXTPF-00547659 225mg  | Week12 | BEND5 protein_coding     | chr1  | 49193195  | 49242641 -  | 2138  | 69.94144 | 0.003315 | 0.512124 | 0.147793 | 3.465142 | 0.000607 | 0.070123 | 1 |
| ENSG00000144791.5  | TREATTXTPF-00547659 225mg  | Week12 | LIMD1 protein_coding     | chr3  | 45596886  | 45727830 +  | 12673 | 2067.466 | 0        | 0.353151 | 0.101926 | 3.464771 | 0.000608 | 0.070123 | 1 |
| ENSG00000185513.10 | TREATTXTPF-00547659 225mg  | Week12 | L3MBTL1 protein_coding   | chr20 | 42136320  | 42179590 +  | 10674 | 317.9182 | 0.001105 | 0.35079  | 0.101252 | 3.464513 | 0.000609 | 0.070123 | 1 |
| ENSG00000090565.11 | TREATTXTPF-00547659 225mg  | Week12 | RAB11FIP: protein_coding | chr16 | 475619    | 573011 +    | 6317  | 981.1779 | 0        | 0.306124 | 0.08836  | 3.464495 | 0.000609 | 0.070123 | 1 |
| ENSG00000211784.2  | TREATTXTPF-00547659 225mg  | Week12 | TRAV10 TR_V_gene         | chr14 | 22293636  | 22294239 +  | 379   | 60.69282 | 0.00884  | 0.561208 | 0.161999 | 3.464279 | 0.000609 | 0.070123 | 1 |
| ENSG00000112640.10 | TREATTXTPF-00547659 225mg  | Week12 | PPP2R5D protein_coding   | chr6  | 42952237  | 42980080 +  | 3314  | 2271.371 | 0        | 0.193567 | 0.055876 | 3.464199 | 0.000609 | 0.070123 | 1 |
| ENSG00000106144.15 | TREATTXTPF-00547659 225mg  | Week12 | CASP2 protein_coding     | chr7  | 142985308 | 143004789 + | 8020  | 3905.164 | 0        | 0.210477 | 0.06078  | 3.462925 | 0.000612 | 0.070358 | 1 |
| ENSG00000197694.9  | TREATTXTPF-00547659 225mg  | Week12 | SPTAN1 protein_coding    | chr9  | 131314866 | 131395941 + | 11007 | 8836.406 | 0        | 0.303726 | 0.087745 | 3.462145 | 0.000615 | 0.070593 | 1 |
| ENSG00000131844.11 | TREATTXTPF-00547659 225mg  | Week12 | MCCC2 protein_coding     | chr5  | 70883115  | 70954531 +  | 6034  | 1320.783 | 0        | 0.302355 | 0.087359 | 3.461047 | 0.000616 | 0.070593 | 1 |
| ENSG00000066933.11 | TREATTXTPF-00547659 225mg  | Week12 | MYO9A protein_coding     | chr15 | 72114632  | 72410918 -  | 20250 | 660.5801 | 0        | 0.35989  | 0.103991 | 3.460778 | 0.000617 | 0.070593 | 1 |
| ENSG00000112320.7  | TREATTXTPF-00547659 225mg  | Week12 | SOBP protein_coding      | chr6  | 107811162 | 107981357 + | 5774  | 17.36022 | 0.054144 | 0.584136 | 0.168802 | 3.460489 | 0.000617 | 0.070593 | 1 |
| ENSG00000143842.10 | TREATTXTPF-00547659 75mg   | Week12 | SOX13 protein_coding     | chr1  | 204042243 | 204096863 + | 7412  | 293.7989 | 0        | 0.388579 | 0.112303 | 3.460093 | 0.000618 | 0.070593 | 1 |
| ENSG00000088808.12 | TREATTXTPF-00547659 225mg  | Week12 | PPP1R13B protein_coding  | chr14 | 104200089 | 104313927 - | 9031  | 496.4884 | 0.001105 | 0.35386  | 0.102273 | 3.45996  | 0.000619 | 0.070593 | 1 |
| ENSG00000105717.9  | TREATTXTPF-00547659 225mg  | Week12 | PBX4 protein_coding      | chr19 | 19672522  | 19729725 -  | 2548  | 273.242  | 0        | 0.345028 | 0.09976  | 3.458576 | 0.000622 | 0.070784 | 1 |
| ENSG00000138942.11 | TREATTXTPF-00547659 22.5mg | Week12 | RNF185 protein_coding    | chr22 | 31556168  | 31603005 +  | 3447  | 2759.916 | 0        | 0.146403 | 0.042332 | 3.458455 | 0.000622 | 0.070784 | 1 |
| ENSG00000157617.12 | TREATTXTPF-00547659 225mg  | Week12 | C2CD2 protein_coding     | chr21 | 43305221  | 43373999 -  | 8602  | 357.7116 | 0        | 0.385236 | 0.111405 | 3.45799  | 0.000623 | 0.070784 | 1 |
| ENSG00000196943.8  | TREATTXTPF-00547659 225mg  | Week12 | NOP9 protein_coding      | chr14 | 24769068  | 24778330 +  | 6033  | 1491.091 | 0        | 0.26941  | 0.077912 | 3.457859 | 0.000623 | 0.070784 | 1 |
| ENSG00000161558.6  | TREATTXTPF-00547659 225mg  | Week12 | TMEM143 protein_coding   | chr19 | 48835613  | 48867494 -  | 3701  | 237.8928 | 0.001105 | 0.302131 | 0.087388 | 3.457353 | 0.000624 | 0.070827 | 1 |
| ENSG00000135108.10 | TREATTXTPF-00547659 225mg  | Week12 | FBXO21 protein_coding    | chr12 | 117581146 | 117628336 - | 5596  | 979.4055 | 0        | 0.322    | 0.093163 | 3.456313 | 0.000627 | 0.070958 | 1 |
| ENSG00000176533.8  | TREATTXTPF-00547659 75mg   | Week12 | GNG7 protein_coding      | chr19 | 25112127  | 2702707 -   | 4561  | 1105.566 | 0        | 0.268627 | 0.077744 | 3.455272 | 0.000629 | 0.070958 | 1 |
| ENSG00000101082.9  | TREATTXTPF-00547659 75mg   | Week12 | SLA2 protein_coding      | chr20 | 35240721  | 35274619 -  | 2757  | 2144.355 | 0        | 0.24292  | 0.070307 | 3.455132 | 0.000629 | 0.070958 | 1 |
| ENSG00000073861.2  | TREATTXTPF-00547659 75mg   | Week12 | TBX21 protein_coding     | chr17 | 45810610  | 45823485 +  | 2614  | 2641.919 | 0        | 0.408393 | 0.118206 | 3.454909 | 0.00063  | 0.070958 | 1 |
| ENSG00000173914.7  | TREATTXTPF-00547659 225mg  | Week12 | RBM4B protein_coding     | chr11 | 66432469  | 66445392 -  | 4325  | 691.1204 | 0        | 0.231093 | 0.066894 | 3.454592 | 0.000631 | 0.070958 | 1 |
| ENSG00000065029.10 | TREATTXTPF-00547659 225mg  | Week12 | ZNF76 protein_coding     | chr6  | 35226686  | 35263762 +  | 6789  | 1338.734 | 0        | 0.302189 | 0.08749  | 3.45399  | 0.000632 | 0.070958 | 1 |
| ENSG00000174231.12 | TREATTXTPF-00547659 225mg  | Week12 | PRPF8 protein_coding     | chr17 | 1553923   | 1588176 -   | 11355 | 12214.22 | 0        | 0.251002 | 0.072674 | 3.453809 | 0.000632 | 0.070958 | 1 |
| ENSG00000158941.12 | TREATTXTPF-00547659 225mg  | Week12 | CCAR2 protein_coding     | chr8  | 22462145  | 22479027 +  | 6534  | 4920.686 | 0        | 0.227571 | 0.065892 | 3.453724 | 0.000633 | 0.070958 | 1 |
| ENSG00000160791.12 | TREATTXTPF-00547659 75mg   | Week12 | CCR5 protein_coding      | chr3  | 46411633  | 46417697 +  | 3883  | 1157.828 | 0        | 0.37009  | 0.10716  | 3.453362 | 0.000633 | 0.070958 | 1 |
| ENSG00000144028.10 | TREATTXTPF-00547659 225mg  | Week12 | SNRNP20C protein_coding  | chr2  | 96940074  | 96971297 -  | 10970 | 10541.38 | 0        | 0.232137 | 0.06722  | 3.453376 | 0.000633 | 0.070958 | 1 |
| ENSG00000119487.12 | TREATTXTPF-00547659 225mg  | Week12 | MAPKAP1 protein_coding   | chr9  | 128199672 | 128469513 - | 6741  | 2605.308 | 0        | 0.185446 | 0.053703 | 3.453171 | 0.000634 | 0.070958 | 1 |



|                    |                           |        |           |                      |       |           |             |       |          |          |          |          |          |          |          |   |
|--------------------|---------------------------|--------|-----------|----------------------|-------|-----------|-------------|-------|----------|----------|----------|----------|----------|----------|----------|---|
| ENSG00000149679.7  | TREATTXTPF-00547659 75mg  | Week12 | CABLES2   | protein_coding       | chr20 | 60963688  | 60982341 -  | 3785  | 567.4685 | 0        | 0.191511 | 0.055467 | 3.452737 | 0.000635 | 0.070984 | 1 |
| ENSG00000141569.6  | TREATTXTPF-00547659 225mg | Week12 | TRIM65    | protein_coding       | chr17 | 73876416  | 73893084 -  | 3906  | 1122.376 | 0        | 0.287294 | 0.083253 | 3.450849 | 0.000639 | 0.071319 | 1 |
| ENSG00000160294.6  | TREATTXTPF-00547659 225mg | Week12 | MCM3AP    | protein_coding       | chr21 | 47655047  | 47706211 -  | 9353  | 4387.549 | 0        | 0.215083 | 0.062342 | 3.450071 | 0.000641 | 0.071319 | 1 |
| ENSG00000204256.8  | TREATTXTPF-00547659 225mg | Week12 | BRD2      | protein_coding       | chr6  | 32936437  | 32949282 +  | 7337  | 14259.61 | 0        | 0.193079 | 0.055965 | 3.450006 | 0.000641 | 0.071319 | 1 |
| ENSG00000224066.1  | TREATTXTPF-00547659 225mg | Week12 | RP4-622L5 | antisense            | chr1  | 32670370  | 32672415 -  | 1357  | 36.09282 | 0.00884  | 0.446354 | 0.129378 | 3.449993 | 0.000641 | 0.071319 | 1 |
| ENSG00000131795.8  | TREATTXTPF-00547659 225mg | Week12 | RBM8A     | protein_coding       | chr1  | 145507598 | 145513536 + | 5240  | 3650.986 | 0        | 0.165899 | 0.048093 | 3.449559 | 0.000642 | 0.071319 | 1 |
| ENSG00000144021.2  | TREATTXTPF-00547659 225mg | Week12 | CIAO1     | protein_coding       | chr2  | 96931870  | 96939087 +  | 4031  | 3070.952 | 0        | 0.201217 | 0.058334 | 3.449393 | 0.000642 | 0.071319 | 1 |
| ENSG00000165209.14 | TREATTXTPF-00547659 225mg | Week12 | STRBP     | protein_coding       | chr9  | 125871779 | 126030855 - | 8085  | 625.7602 | 0        | 0.379031 | 0.109892 | 3.449108 | 0.000643 | 0.071319 | 1 |
| ENSG00000121413.8  | TREATTXTPF-00547659 75mg  | Week12 | ZSCAN18   | protein_coding       | chr19 | 58595205  | 58629794 -  | 8307  | 970.2564 | 0        | 0.323256 | 0.093745 | 3.448247 | 0.000645 | 0.071373 | 1 |
| ENSG00000057935.9  | TREATTXTPF-00547659 225mg | Week12 | MTA3      | protein_coding       | chr2  | 42721709  | 42984087 +  | 10580 | 477.6696 | 0        | 0.329877 | 0.095675 | 3.447879 | 0.000646 | 0.071373 | 1 |
| ENSG00000132185.12 | TREATTXTPF-00547659 225mg | Week12 | FCRLA     | protein_coding       | chr1  | 161676762 | 161684142 + | 3275  | 1038.283 | 0        | 0.423677 | 0.122881 | 3.447879 | 0.000646 | 0.071373 | 1 |
| ENSG00000172345.9  | TREATTXTPF-00547659 225mg | Week12 | STAR5     | protein_coding       | chr15 | 81601394  | 81616524 -  | 6339  | 158.5171 | 0        | 0.323904 | 0.093955 | 3.447446 | 0.000647 | 0.071373 | 1 |
| ENSG00000132383.7  | TREATTXTPF-00547659 225mg | Week12 | RPA1      | protein_coding       | chr17 | 1732996   | 1803376 +   | 5492  | 3899.725 | 0        | 0.240523 | 0.069772 | 3.447255 | 0.000647 | 0.071373 | 1 |
| ENSG00000088247.11 | TREATTXTPF-00547659 225mg | Week12 | KHSRP     | protein_coding       | chr19 | 6413359   | 6424805 +   | 4563  | 4172.301 | 0        | 0.229558 | 0.066618 | 3.445889 | 0.00065  | 0.071638 | 1 |
| ENSG00000197226.8  | TREATTXTPF-00547659 225mg | Week12 | TBC1D9B   | protein_coding       | chr5  | 179289066 | 179334859 - | 11473 | 4328.871 | 0        | 0.257173 | 0.07464  | 3.445496 | 0.000651 | 0.071655 | 1 |
| ENSG00000186866.12 | TREATTXTPF-00547659 225mg | Week12 | POFUT2    | protein_coding       | chr21 | 46683843  | 46707813 -  | 5771  | 1099.413 | 0        | 0.221487 | 0.064291 | 3.445101 | 0.000652 | 0.071657 | 1 |
| ENSG00000119772.12 | TREATTXTPF-00547659 225mg | Week12 | DNMT3A    | protein_coding       | chr2  | 25455845  | 25565459 -  | 6899  | 1546.938 | 0        | 0.183885 | 0.05338  | 3.444837 | 0.000653 | 0.071657 | 1 |
| ENSG00000213190.2  | TREATTXTPF-00547659 225mg | Week12 | MLLT11    | protein_coding       | chr1  | 151030234 | 151040970 + | 4072  | 209.8309 | 0.00221  | 0.389181 | 0.112991 | 3.444347 | 0.000654 | 0.071696 | 1 |
| ENSG00000049246.10 | TREATTXTPF-00547659 225mg | Week12 | PER3      | protein_coding       | chr1  | 7844380   | 7905237 +   | 8059  | 210.2343 | 0.001105 | 0.440603 | 0.127932 | 3.444033 | 0.000655 | 0.071696 | 1 |
| ENSG00000106608.12 | TREATTXTPF-00547659 225mg | Week12 | URGCP     | protein_coding       | chr7  | 43915493  | 43966010 -  | 7844  | 892.6619 | 0        | 0.289968 | 0.084204 | 3.443613 | 0.000656 | 0.07172  | 1 |
| ENSG00000228486.5  | TREATTXTPF-00547659 225mg | Week12 | AC017099  | antisense            | chr2  | 98280680  | 98319527 +  | 5591  | 79.03757 | 0.00663  | 0.491981 | 0.142929 | 3.442133 | 0.000659 | 0.071842 | 1 |
| ENSG00000105127.4  | TREATTXTPF-00547659 225mg | Week12 | AKAP8     | protein_coding       | chr19 | 15464196  | 15490609 +  | 4296  | 1640.177 | 0        | 0.231518 | 0.067266 | 3.441835 | 0.00066  | 0.071842 | 1 |
| ENSG00000175779.1  | TREATTXTPF-00547659 75mg  | Week12 | C15orf53  | protein_coding       | chr15 | 38988799  | 38992239 +  | 2043  | 6.803315 | 0.19779  | 0.563127 | 0.163617 | 3.441738 | 0.00066  | 0.071842 | 1 |
| ENSG00000130956.9  | TREATTXTPF-00547659 225mg | Week12 | HABP4     | protein_coding       | chr9  | 99212483  | 99253618 +  | 4056  | 619.1083 | 0        | 0.373192 | 0.108442 | 3.441394 | 0.000661 | 0.071842 | 1 |
| ENSG00000133627.13 | TREATTXTPF-00547659 75mg  | Week12 | ACTR3B    | protein_coding       | chr7  | 152456834 | 152552463 + | 6024  | 212.7072 | 0        | 0.195785 | 0.056898 | 3.440991 | 0.000662 | 0.071842 | 1 |
| ENSG00000196169.10 | TREATTXTPF-00547659 75mg  | Week12 | KIF19     | protein_coding       | chr17 | 72322349  | 72351959 +  | 5640  | 118.8906 | 0.00442  | 0.546764 | 0.158898 | 3.440967 | 0.000662 | 0.071842 | 1 |
| ENSG00000189091.8  | TREATTXTPF-00547659 225mg | Week12 | SFB3      | protein_coding       | chr16 | 70557691  | 70608820 +  | 9666  | 5262.78  | 0        | 0.266701 | 0.077518 | 3.440512 | 0.000663 | 0.071842 | 1 |
| ENSG00000186231.12 | TREATTXTPF-00547659 225mg | Week12 | KLHL32    | protein_coding       | chr6  | 97372605  | 97588630 +  | 3777  | 34.28619 | 0.018785 | 0.584539 | 0.169903 | 3.440427 | 0.000663 | 0.071842 | 1 |
| ENSG00000204574.8  | TREATTXTPF-00547659 225mg | Week12 | ABCF1     | protein_coding       | chr6  | 30539153  | 30564956 +  | 4523  | 2919.641 | 0        | 0.260817 | 0.075814 | 3.44023  | 0.000664 | 0.071842 | 1 |
| ENSG00000100129.13 | TREATTXTPF-00547659 225mg | Week12 | EIF3L     | protein_coding       | chr22 | 38244875  | 38285414 +  | 4296  | 18966.8  | 0        | 0.244334 | 0.071033 | 3.439734 | 0.000665 | 0.071887 | 1 |
| ENSG00000101224.13 | TREATTXTPF-00547659 225mg | Week12 | CDC25B    | protein_coding       | chr20 | 3767578   | 3786762 +   | 4149  | 7696.788 | 0        | 0.355689 | 0.103448 | 3.438324 | 0.000668 | 0.072166 | 1 |
| ENSG00000211789.2  | TREATTXTPF-00547659 75mg  | Week12 | TRAV12-2  | TR_V_gene            | chr14 | 22356037  | 22356682 +  | 445   | 297.3823 | 0        | 0.417904 | 0.121557 | 3.437933 | 0.000669 | 0.072184 | 1 |
| ENSG00000247287.2  | TREATTXTPF-00547659 225mg | Week12 | RP11-902f | processed_transcript | chr14 | 61764882  | 61789536 -  | 4852  | 78.67624 | 0.007735 | 0.555096 | 0.161487 | 3.437409 | 0.00067  | 0.072236 | 1 |
| ENSG00000036828.9  | TREATTXTPF-00547659 75mg  | Week12 | CASR      | protein_coding       | chr3  | 121902530 | 122005342 + | 5390  | 4.093923 | 0.379006 | 0.527004 | 0.153355 | 3.436491 | 0.000673 | 0.072337 | 1 |
| ENSG00000176148.11 | TREATTXTPF-00547659 75mg  | Week12 | TCP11L1   | protein_coding       | chr11 | 33060963  | 33127489 +  | 5370  | 336.2254 | 0        | 0.243081 | 0.070742 | 3.436153 | 0.000673 | 0.072337 | 1 |
| ENSG00000121057.8  | TREATTXTPF-00547659 225mg | Week12 | AKAP1     | protein_coding       | chr17 | 55162453  | 55198710 +  | 5399  | 795.6276 | 0        | 0.335772 | 0.09772  | 3.436056 | 0.000674 | 0.072337 | 1 |
| ENSG00000203485.8  | TREATTXTPF-00547659 225mg | Week12 | INF2      | protein_coding       | chr14 | 105155943 | 105185942 + | 6497  | 1892.473 | 0        | 0.28054  | 0.081681 | 3.4346   | 0.000677 | 0.07263  | 1 |
| ENSG00000154310.12 | TREATTXTPF-00547659 225mg | Week12 | TNIK      | protein_coding       | chr3  | 170779128 | 171178197 - | 8572  | 1109.783 | 0        | 0.350066 | 0.101962 | 3.433288 | 0.00068  | 0.07279  | 1 |
| ENSG00000100023.13 | TREATTXTPF-00547659 225mg | Week12 | PPIL2     | protein_coding       | chr22 | 22006559  | 22054304 +  | 8462  | 2718.398 | 0        | 0.206537 | 0.06016  | 3.433147 | 0.000681 | 0.07279  | 1 |
| ENSG00000159445.8  | TREATTXTPF-00547659 225mg | Week12 | THEM4     | protein_coding       | chr1  | 151846060 | 151882284 - | 4390  | 1071.838 | 0        | 0.393794 | 0.114708 | 3.433025 | 0.000681 | 0.07279  | 1 |
| ENSG00000145996.7  | TREATTXTPF-00547659 225mg | Week12 | CDKAL1    | protein_coding       | chr6  | 20534688  | 21232635 +  | 3358  | 515.5713 | 0        | 0.277876 | 0.080966 | 3.432    | 0.000683 | 0.072888 | 1 |
| ENSG00000166860.2  | TREATTXTPF-00547659 225mg | Week12 | ZBTB39    | protein_coding       | chr12 | 57392618  | 57400230 -  | 6170  | 518.5448 | 0        | 0.366433 | 0.10678  | 3.431674 | 0.000684 | 0.072888 | 1 |
| ENSG00000089220.4  | TREATTXTPF-00547659 225mg | Week12 | PEBP1     | protein_coding       | chr12 | 118573663 | 118583389 + | 1780  | 3067.228 | 0        | 0.314365 | 0.091638 | 3.430514 | 0.000687 | 0.072888 | 1 |
| ENSG00000167778.4  | TREATTXTPF-00547659 75mg  | Week12 | SPRYD3    | protein_coding       | chr12 | 53458388  | 53473204 +  | 3191  | 3001.37  | 0        | 0.172955 | 0.050417 | 3.430487 | 0.000687 | 0.072888 | 1 |
| ENSG00000177192.9  | TREATTXTPF-00547659 225mg | Week12 | PUS1      | protein_coding       | chr12 | 132413745 | 132428406 + | 3699  | 747.305  | 0        | 0.288705 | 0.084173 | 3.429888 | 0.000688 | 0.072888 | 1 |
| ENSG00000090857.9  | TREATTXTPF-00547659 225mg | Week12 | PDPR      | protein_coding       | chr16 | 70147529  | 70195203 +  | 9148  | 2021.96  | 0        | 0.395397 | 0.115281 | 3.429865 | 0.000689 | 0.072888 | 1 |
| ENSG00000174136.7  | TREATTXTPF-00547659 225mg | Week12 | RGMB      | protein_coding       | chr5  | 98104354  | 98134347 +  | 6671  | 263.7083 | 0.003315 | 0.520322 | 0.151714 | 3.429617 | 0.000689 | 0.072888 | 1 |
| ENSG00000130702.9  | TREATTXTPF-00547659 225mg | Week12 | LAMA5     | protein_coding       | chr20 | 60883011  | 60942368 -  | 14705 | 127.9912 | 0.00221  | 0.462688 | 0.134916 | 3.429449 | 0.00069  | 0.072888 | 1 |
| ENSG00000140950.11 | TREATTXTPF-00547659 225mg | Week12 | TLDC1     | protein_coding       | chr16 | 84511681  | 84587639 -  | 6505  | 348.7757 | 0.00221  | 0.25469  | 0.074279 | 3.428824 | 0.000691 | 0.072888 | 1 |
| ENSG00000135127.7  | TREATTXTPF-00547659 225mg | Week12 | CCDC64    | protein_coding       | chr12 | 120427673 | 120532298 + | 4793  | 929.1602 | 0        | 0.391375 | 0.114143 | 3.428816 | 0.000691 | 0.072888 | 1 |
| ENSG00000183019.3  | TREATTXTPF-00547659 75mg  | Week12 | C19orf59  | protein_coding       | chr19 | 7741514   | 7744712 +   | 1906  | 3653.652 | 0        | -0.65409 | 0.190771 | -3.42868 | 0.000691 | 0.072888 | 1 |
| ENSG00000084693.11 | TREATTXTPF-00547659 225mg | Week12 | AGBL5     | protein_coding       | chr2  | 27265232  | 27293490 +  | 5283  | 482.3735 | 0        | 0.211103 | 0.061571 | 3.428609 | 0.000692 | 0.072888 | 1 |
| ENSG00000140688.12 | TREATTXTPF-00547659 225mg | Week12 | C16orf58  | protein_coding       | chr16 | 31500792  | 31520630 -  | 3630  | 1924.937 | 0        | 0.273967 | 0.079908 | 3.428544 | 0.000692 | 0.072888 | 1 |

|                    |                            |        |          |                |       |           |           |   |       |          |          |          |          |          |          |          |   |
|--------------------|----------------------------|--------|----------|----------------|-------|-----------|-----------|---|-------|----------|----------|----------|----------|----------|----------|----------|---|
| ENSG00000111266.4  | TREATTXTPF-00547659 225mg  | Week12 | DUSP16   | protein_coding | chr12 | 12628829  | 12715317  | - | 4039  | 973.4475 | 0        | 0.363575 | 0.106056 | 3.428136 | 0.000693 | 0.072912 | 1 |
| ENSG00000175130.6  | TREATTXTPF-00547659 225mg  | Week12 | MARCKSL1 | protein_coding | chr1  | 32799433  | 32801980  | - | 1699  | 3435.297 | 0        | 0.278521 | 0.081261 | 3.427482 | 0.000694 | 0.072915 | 1 |
| ENSG00000186231.12 | TREATTXTPF-00547659 75mg   | Week12 | KLHL32   | protein_coding | chr6  | 97372605  | 97588630  | + | 3777  | 34.28619 | 0.018785 | 0.566209 | 0.165238 | 3.426632 | 0.000696 | 0.072915 | 1 |
| ENSG00000140750.12 | TREATTXTPF-00547659 225mg  | Week12 | ARHGAP1  | protein_coding | chr16 | 24930706  | 25026987  | - | 9892  | 2013.486 | 0        | 0.317905 | 0.092786 | 3.426225 | 0.000697 | 0.072915 | 1 |
| ENSG00000164038.10 | TREATTXTPF-00547659 225mg  | Week12 | SLC9B2   | protein_coding | chr4  | 103941025 | 104006986 | - | 5469  | 238.8442 | 0.001105 | 0.409669 | 0.119579 | 3.425911 | 0.000698 | 0.072915 | 1 |
| ENSG00000105429.8  | TREATTXTPF-00547659 225mg  | Week12 | MEGF8    | protein_coding | chr19 | 42829761  | 42882921  | + | 11372 | 449.3293 | 0.001105 | 0.285923 | 0.083462 | 3.425796 | 0.000699 | 0.072915 | 1 |
| ENSG00000168589.10 | TREATTXTPF-00547659 22.5mg | Week12 | DYNLRB2  | protein_coding | chr16 | 80574631  | 80584657  | + | 1464  | 2.248619 | 0.493923 | 0.438137 | 0.127899 | 3.425636 | 0.000699 | 0.072915 | 1 |
| ENSG00000063978.11 | TREATTXTPF-00547659 75mg   | Week12 | RNF4     | protein_coding | chr4  | 2463947   | 2627047   | + | 7276  | 5212.419 | 0        | 0.189213 | 0.055238 | 3.425419 | 0.000699 | 0.072915 | 1 |
| ENSG00000126351.8  | TREATTXTPF-00547659 225mg  | Week12 | THRA     | protein_coding | chr17 | 38214543  | 38250120  | + | 6959  | 1511.95  | 0        | 0.251917 | 0.073544 | 3.425373 | 0.0007   | 0.072915 | 1 |
| ENSG00000168488.14 | TREATTXTPF-00547659 225mg  | Week12 | ATXN2L   | protein_coding | chr16 | 28834356  | 28848558  | + | 6508  | 6131.97  | 0        | 0.241048 | 0.070373 | 3.425317 | 0.0007   | 0.072915 | 1 |
| ENSG00000178038.12 | TREATTXTPF-00547659 225mg  | Week12 | ALS2CL   | protein_coding | chr3  | 46710487  | 46735194  | - | 9057  | 440.7315 | 0.001105 | 0.447841 | 0.130767 | 3.424724 | 0.000701 | 0.072984 | 1 |
| ENSG00000138336.8  | TREATTXTPF-00547659 225mg  | Week12 | TET1     | protein_coding | chr10 | 70320413  | 70454239  | + | 9288  | 34.81989 | 0.01547  | 0.529571 | 0.154645 | 3.42443  | 0.000702 | 0.072984 | 1 |
| ENSG00000048707.9  | TREATTXTPF-00547659 225mg  | Week12 | VPS13D   | protein_coding | chr1  | 12290124  | 12572099  | + | 20346 | 2626.789 | 0        | 0.243317 | 0.071061 | 3.424046 | 0.000703 | 0.073003 | 1 |
| ENSG00000204371.7  | TREATTXTPF-00547659 225mg  | Week12 | EHMT2    | protein_coding | chr6  | 31847536  | 31865464  | - | 7289  | 2281.452 | 0        | 0.264104 | 0.077143 | 3.423563 | 0.000704 | 0.073048 | 1 |
| ENSG00000221829.5  | TREATTXTPF-00547659 75mg   | Week12 | FGCG     | protein_coding | chr9  | 35073832  | 35080013  | - | 3614  | 373.9403 | 0        | 0.255726 | 0.074711 | 3.422875 | 0.000706 | 0.073098 | 1 |
| ENSG00000249115.4  | TREATTXTPF-00547659 225mg  | Week12 | HAUS5    | protein_coding | chr19 | 36103646  | 36116251  | + | 5075  | 534.6972 | 0        | 0.340261 | 0.099412 | 3.422752 | 0.000706 | 0.073098 | 1 |
| ENSG00000198208.7  | TREATTXTPF-00547659 225mg  | Week12 | RPS6KL1  | protein_coding | chr14 | 75370657  | 75390099  | - | 7617  | 45.06851 | 0.01326  | 0.567513 | 0.165832 | 3.422215 | 0.000707 | 0.073157 | 1 |
| ENSG00000232097.1  | TREATTXTPF-00547659 225mg  | Week12 | AC079781 | pseudogene     | chr7  | 97567751  | 97568106  | - | 356   | 2.664088 | 0.453039 | 0.46483  | 0.135862 | 3.421336 | 0.00071  | 0.073306 | 1 |
| ENSG00000161835.6  | TREATTXTPF-00547659 225mg  | Week12 | GRASP    | protein_coding | chr12 | 52400724  | 52409673  | + | 2829  | 208.8862 | 0.00221  | 0.361752 | 0.105748 | 3.420885 | 0.000711 | 0.073343 | 1 |
| ENSG00000120555.9  | TREATTXTPF-00547659 225mg  | Week12 | SEPT7P9  | pseudogene     | chr10 | 38671997  | 38691844  | - | 1204  | 3.761326 | 0.358011 | 0.517208 | 0.151234 | 3.419914 | 0.000713 | 0.073515 | 1 |
| ENSG00000158089.10 | TREATTXTPF-00547659 75mg   | Week12 | GALNT14  | protein_coding | chr2  | 31133333  | 31378068  | - | 4567  | 718.6144 | 0        | -0.56479 | 0.165175 | -3.41933 | 0.000715 | 0.073587 | 1 |
| ENSG00000107742.8  | TREATTXTPF-00547659 75mg   | Week12 | SPOCK2   | protein_coding | chr10 | 73818793  | 73848790  | - | 6472  | 17836.64 | 0        | 0.318645 | 0.093246 | 3.417257 | 0.00072  | 0.073957 | 1 |
| ENSG00000196305.13 | TREATTXTPF-00547659 225mg  | Week12 | IARS     | protein_coding | chr9  | 94972489  | 95056038  | - | 7501  | 2104.836 | 0        | 0.33623  | 0.098414 | 3.416481 | 0.000722 | 0.073957 | 1 |
| ENSG00000143319.12 | TREATTXTPF-00547659 75mg   | Week12 | ISG20L2  | protein_coding | chr1  | 156691683 | 156698591 | - | 5262  | 2240.42  | 0        | 0.129134 | 0.0378   | 3.416248 | 0.000723 | 0.073957 | 1 |
| ENSG00000177728.10 | TREATTXTPF-00547659 225mg  | Week12 | KIAA0195 | protein_coding | chr17 | 73437240  | 73496171  | + | 8854  | 2526.495 | 0        | 0.225442 | 0.065993 | 3.416167 | 0.000723 | 0.073957 | 1 |
| ENSG00000145216.11 | TREATTXTPF-00547659 225mg  | Week12 | FIP1L1   | protein_coding | chr4  | 54243810  | 55161439  | + | 7169  | 1758.559 | 0        | 0.198783 | 0.058192 | 3.416005 | 0.000723 | 0.073957 | 1 |
| ENSG00000080546.9  | TREATTXTPF-00547659 225mg  | Week12 | SESN1    | protein_coding | chr6  | 109307640 | 109416022 | - | 5121  | 1126.242 | 0        | 0.404093 | 0.118297 | 3.415933 | 0.000723 | 0.073957 | 1 |
| ENSG00000163611.7  | TREATTXTPF-00547659 225mg  | Week12 | SPICE1   | protein_coding | chr3  | 113161565 | 113234034 | - | 7941  | 214.8508 | 0.00221  | 0.39482  | 0.115587 | 3.415769 | 0.000724 | 0.073957 | 1 |
| ENSG00000112855.10 | TREATTXTPF-00547659 225mg  | Week12 | HARS2    | protein_coding | chr5  | 140071011 | 140078889 | + | 3422  | 1880.555 | 0        | 0.15982  | 0.046796 | 3.415281 | 0.000725 | 0.074005 | 1 |
| ENSG00000176225.8  | TREATTXTPF-00547659 225mg  | Week12 | RTTN     | protein_coding | chr18 | 67671029  | 67873181  | - | 9077  | 308.1359 | 0.001105 | 0.361317 | 0.10583  | 3.414133 | 0.000728 | 0.074197 | 1 |
| ENSG00000141956.9  | TREATTXTPF-00547659 225mg  | Week12 | PRDM15   | protein_coding | chr21 | 43218385  | 43299591  | - | 13004 | 556.9017 | 0        | 0.322337 | 0.094418 | 3.413937 | 0.000728 | 0.074197 | 1 |
| ENSG00000162777.12 | TREATTXTPF-00547659 225mg  | Week12 | DENND2D  | protein_coding | chr1  | 111729796 | 111747157 | - | 5515  | 6800.459 | 0        | 0.265164 | 0.077685 | 3.413336 | 0.00073  | 0.074275 | 1 |
| ENSG00000149292.12 | TREATTXTPF-00547659 225mg  | Week12 | TTC12    | protein_coding | chr11 | 113185251 | 113254266 | + | 5302  | 315.4331 | 0        | 0.354829 | 0.103982 | 3.412391 | 0.000732 | 0.07429  | 1 |
| ENSG00000167895.10 | TREATTXTPF-00547659 225mg  | Week12 | TMC8     | protein_coding | chr17 | 76126851  | 76139049  | + | 5459  | 11614.05 | 0        | 0.25268  | 0.07405  | 3.412314 | 0.000733 | 0.07429  | 1 |
| ENSG00000180438.10 | TREATTXTPF-00547659 75mg   | Week12 | LTXL     | protein_coding | chr3  | 13978756  | 14124311  | + | 3630  | 0.855249 | 0.78453  | 0.306881 | 0.08994  | 3.412052 | 0.000733 | 0.07429  | 1 |
| ENSG00000107816.13 | TREATTXTPF-00547659 225mg  | Week12 | LZTS2    | protein_coding | chr10 | 102756375 | 102767593 | + | 6547  | 790.9182 | 0        | 0.298388 | 0.087459 | 3.411762 | 0.000734 | 0.07429  | 1 |
| ENSG00000122507.16 | TREATTXTPF-00547659 225mg  | Week12 | BBS9     | protein_coding | chr7  | 33168856  | 33645680  | + | 5827  | 324.8099 | 0.001105 | 0.363361 | 0.106505 | 3.411666 | 0.000734 | 0.07429  | 1 |
| ENSG00000126822.11 | TREATTXTPF-00547659 75mg   | Week12 | PLEKHG3  | protein_coding | chr14 | 65170820  | 65213610  | + | 8555  | 8119.486 | 0        | 0.246504 | 0.072258 | 3.411462 | 0.000735 | 0.07429  | 1 |
| ENSG00000179388.8  | TREATTXTPF-00547659 225mg  | Week12 | EGR3     | protein_coding | chr8  | 22545172  | 22550815  | - | 4855  | 49.62541 | 0.01326  | 0.647505 | 0.189831 | 3.410955 | 0.000736 | 0.074434 | 1 |
| ENSG00000178229.7  | TREATTXTPF-00547659 225mg  | Week12 | ZNF543   | protein_coding | chr19 | 57831877  | 57842144  | + | 3659  | 140.3735 | 0.001105 | 0.366956 | 0.107607 | 3.410155 | 0.000738 | 0.074426 | 1 |
| ENSG00000172116.17 | TREATTXTPF-00547659 75mg   | Week12 | CD8B     | protein_coding | chr2  | 87042462  | 87089047  | - | 1864  | 2717.664 | 0        | 0.387531 | 0.113644 | 3.410039 | 0.000739 | 0.074426 | 1 |
| ENSG00000007202.10 | TREATTXTPF-00547659 225mg  | Week12 | KIAA0100 | protein_coding | chr17 | 26941458  | 26972472  | - | 9235  | 6895.464 | 0        | 0.215839 | 0.063322 | 3.408594 | 0.000742 | 0.074695 | 1 |
| ENSG00000257093.2  | TREATTXTPF-00547659 225mg  | Week12 | KIAA1147 | protein_coding | chr7  | 141356528 | 141401953 | - | 7356  | 2078.221 | 0        | 0.427542 | 0.125448 | 3.408137 | 0.000743 | 0.074695 | 1 |
| ENSG00000241657.1  | TREATTXTPF-00547659 225mg  | Week12 | TRBV11-2 | lincRNA        | chr7  | 142197570 | 142198069 | - | 408   | 169.2011 | 0.001105 | 0.449579 | 0.131919 | 3.407984 | 0.000744 | 0.074695 | 1 |
| ENSG00000126243.4  | TREATTXTPF-00547659 225mg  | Week12 | LRFN3    | protein_coding | chr19 | 36426260  | 36436669  | + | 4044  | 364.7481 | 0        | 0.399491 | 0.11725  | 3.407184 | 0.000746 | 0.074695 | 1 |
| ENSG00000161395.8  | TREATTXTPF-00547659 225mg  | Week12 | PGAP3    | protein_coding | chr17 | 37827375  | 37853050  | - | 3669  | 980.3448 | 0        | 0.273889 | 0.08039  | 3.407017 | 0.000746 | 0.074695 | 1 |
| ENSG00000106344.4  | TREATTXTPF-00547659 225mg  | Week12 | RBM28    | protein_coding | chr7  | 127937738 | 127983962 | - | 15866 | 1117.272 | 0        | 0.261194 | 0.076668 | 3.406844 | 0.000747 | 0.074695 | 1 |
| ENSG00000239779.2  | TREATTXTPF-00547659 225mg  | Week12 | WBP1     | protein_coding | chr2  | 74685456  | 74688018  | + | 2438  | 397.4873 | 0        | 0.288879 | 0.084794 | 3.40684  | 0.000747 | 0.074695 | 1 |
| ENSG00000084463.3  | TREATTXTPF-00547659 225mg  | Week12 | WBP11    | protein_coding | chr12 | 14939410  | 14956474  | - | 3418  | 3314.901 | 0        | 0.255391 | 0.074969 | 3.406615 | 0.000747 | 0.074695 | 1 |
| ENSG00000037637.6  | TREATTXTPF-00547659 225mg  | Week12 | FBXO42   | protein_coding | chr1  | 16573334  | 16678949  | - | 8984  | 1809.379 | 0        | 0.147891 | 0.043426 | 3.405583 | 0.00075  | 0.074868 | 1 |
| ENSG00000172071.7  | TREATTXTPF-00547659 225mg  | Week12 | EIF2AK3  | protein_coding | chr2  | 88856259  | 88927094  | - | 5434  | 884.7271 | 0        | 0.372647 | 0.10943  | 3.405363 | 0.000751 | 0.074868 | 1 |
| ENSG00000164818.11 | TREATTXTPF-00547659 225mg  | Week12 | HEATR2   | protein_coding | chr7  | 766338    | 829190    | + | 7238  | 560.2807 | 0        | 0.328578 | 0.096532 | 3.403835 | 0.000755 | 0.074927 | 1 |
| ENSG00000253193.4  | TREATTXTPF-00547659 75mg   | Week12 | FCGR1C   | pseudogene     | chr1  | 149369294 | 149378365 | + | 2167  | 201.9182 | 0.005525 | -0.70084 | 0.205923 | -3.40341 | 0.000756 | 0.074927 | 1 |

|                    |                            |        |           |                |       |           |           |   |       |          |          |          |          |          |          |          |   |
|--------------------|----------------------------|--------|-----------|----------------|-------|-----------|-----------|---|-------|----------|----------|----------|----------|----------|----------|----------|---|
| ENSG00000078070.7  | TREATTXTPF-00547659 225mg  | Week12 | MCCC1     | protein_coding | chr3  | 182733006 | 182833863 | - | 4321  | 617.1039 | 0        | 0.284907 | 0.083713 | 3.403392 | 0.000756 | 0.074927 | 1 |
| ENSG00000133874.1  | TREATTXTPF-00547659 75mg   | Week12 | RNF122    | protein_coding | chr8  | 33405273  | 33424643  | - | 1868  | 1151.712 | 0        | 0.192265 | 0.056494 | 3.403267 | 0.000756 | 0.074927 | 1 |
| ENSG00000267106.1  | TREATTXTPF-00547659 225mg  | Week12 | C19orf82  | protein_coding | chr19 | 9731967   | 9756572   | + | 4659  | 68.74917 | 0.005525 | 0.363721 | 0.106879 | 3.403112 | 0.000757 | 0.074927 | 1 |
| ENSG00000112655.11 | TREATTXTPF-00547659 75mg   | Week12 | PTK7      | protein_coding | chr6  | 43044006  | 43129457  | + | 9024  | 116.9978 | 0.003315 | 0.333343 | 0.098001 | 3.402316 | 0.000759 | 0.074927 | 1 |
| ENSG00000015568.8  | TREATTXTPF-00547659 225mg  | Week12 | RGPD5     | protein_coding | chr2  | 110550335 | 110615272 | + | 14175 | 1.883978 | 0.58674  | 0.447407 | 0.131502 | 3.402276 | 0.000759 | 0.074927 | 1 |
| ENSG00000066827.11 | TREATTXTPF-00547659 225mg  | Week12 | ZFAT      | protein_coding | chr8  | 135490031 | 135725292 | - | 8900  | 747.3779 | 0        | 0.182999 | 0.053792 | 3.401961 | 0.00076  | 0.074927 | 1 |
| ENSG00000204564.7  | TREATTXTPF-00547659 75mg   | Week12 | C6orf136  | protein_coding | chr6  | 30614816  | 30620987  | + | 2118  | 505.9083 | 0        | 0.207333 | 0.060947 | 3.401864 | 0.00076  | 0.074927 | 1 |
| ENSG00000152454.3  | TREATTXTPF-00547659 225mg  | Week12 | ZNF256    | protein_coding | chr19 | 58452201  | 58459043  | - | 2176  | 170.7193 | 0.00221  | 0.377435 | 0.110953 | 3.401755 | 0.00076  | 0.074927 | 1 |
| ENSG00000121570.8  | TREATTXTPF-00547659 225mg  | Week12 | DPPA4     | protein_coding | chr3  | 109044988 | 109056419 | - | 4996  | 28.63757 | 0.027624 | 0.541338 | 0.159136 | 3.40172  | 0.00076  | 0.074927 | 1 |
| ENSG00000165661.11 | TREATTXTPF-00547659 225mg  | Week12 | QSOX2     | protein_coding | chr9  | 139098179 | 139137687 | - | 4530  | 851.579  | 0        | 0.34996  | 0.102882 | 3.401581 | 0.000761 | 0.074927 | 1 |
| ENSG00000142002.12 | TREATTXTPF-00547659 225mg  | Week12 | DPP9      | protein_coding | chr19 | 4675236   | 4724685   | - | 8324  | 2852.285 | 0        | 0.180522 | 0.053081 | 3.400855 | 0.000763 | 0.075014 | 1 |
| ENSG00000143434.11 | TREATTXTPF-00547659 225mg  | Week12 | SEMA6C    | protein_coding | chr1  | 151104161 | 151119104 | - | 5773  | 130.547  | 0        | 0.345238 | 0.101521 | 3.40066  | 0.000763 | 0.075014 | 1 |
| ENSG00000168126.3  | TREATTXTPF-00547659 225mg  | Week12 | OR2W6P    | pseudogene     | chr6  | 27905243  | 27906181  | + | 939   | 3.392265 | 0.40442  | -0.45851 | 0.134885 | -3.39928 | 0.000767 | 0.075127 | 1 |
| ENSG00000133985.2  | TREATTXTPF-00547659 22.5mg | Week12 | TTC9      | protein_coding | chr14 | 71108504  | 71142077  | + | 5217  | 1291.958 | 0        | 0.274962 | 0.080903 | 3.398678 | 0.000769 | 0.075127 | 1 |
| ENSG00000237702.2  | TREATTXTPF-00547659 75mg   | Week12 | TRBV3-1   | TR_V_gene      | chr7  | 142008365 | 142008871 | + | 391   | 219.1867 | 0.003315 | 0.471991 | 0.13888  | 3.398561 | 0.000769 | 0.075127 | 1 |
| ENSG00000006025.7  | TREATTXTPF-00547659 225mg  | Week12 | OSBPL7    | protein_coding | chr17 | 45884738  | 45899200  | - | 6572  | 903.6155 | 0        | 0.304238 | 0.089523 | 3.398448 | 0.000769 | 0.075127 | 1 |
| ENSG00000117602.7  | TREATTXTPF-00547659 225mg  | Week12 | RCAN3     | protein_coding | chr1  | 24829387  | 24867530  | + | 6964  | 3310.171 | 0        | 0.428473 | 0.126089 | 3.39817  | 0.00077  | 0.075127 | 1 |
| ENSG00000117174.6  | TREATTXTPF-00547659 225mg  | Week12 | ZNHIT6    | protein_coding | chr1  | 86115106  | 86174116  | - | 6197  | 539.2785 | 0        | 0.422615 | 0.124373 | 3.397954 | 0.000771 | 0.075127 | 1 |
| ENSG00000154549.9  | TREATTXTPF-00547659 225mg  | Week12 | CABP4     | protein_coding | chr11 | 67219877  | 67226699  | + | 2701  | 38.11271 | 0.01326  | 0.567391 | 0.166981 | 3.397925 | 0.000771 | 0.075127 | 1 |
| ENSG00000141577.9  | TREATTXTPF-00547659 225mg  | Week12 | AZI1      | protein_coding | chr17 | 79163393  | 79196799  | - | 3966  | 405.7757 | 0        | 0.254812 | 0.074998 | 3.3976   | 0.000772 | 0.075127 | 1 |
| ENSG00000150477.10 | TREATTXTPF-00547659 225mg  | Week12 | KIAA1328  | protein_coding | chr18 | 34409069  | 34812135  | + | 11127 | 180.3536 | 0.001105 | 0.381235 | 0.112215 | 3.397358 | 0.000772 | 0.075127 | 1 |
| ENSG00000242258.1  | TREATTXTPF-00547659 225mg  | Week12 | LINC0099c | lincRNA        | chr7  | 150130742 | 150145228 | + | 2171  | 52.74917 | 0.016575 | 0.542814 | 0.159778 | 3.397292 | 0.000772 | 0.075127 | 1 |
| ENSG00000156414.14 | TREATTXTPF-00547659 22.5mg | Week12 | TDRD9     | protein_coding | chr14 | 104394799 | 104519004 | + | 5480  | 553.0453 | 0        | -0.49011 | 0.144276 | -3.39701 | 0.000773 | 0.075127 | 1 |
| ENSG00000104365.9  | TREATTXTPF-00547659 225mg  | Week12 | IKBKB     | protein_coding | chr8  | 42128820  | 42189973  | + | 10041 | 4514.217 | 0        | 0.191435 | 0.056363 | 3.396446 | 0.000775 | 0.0752   | 1 |
| ENSG00000187912.7  | TREATTXTPF-00547659 225mg  | Week12 | CLEC17A   | protein_coding | chr19 | 14693896  | 14721969  | + | 2265  | 348.0762 | 0.001105 | 0.492996 | 0.145168 | 3.396037 | 0.000776 | 0.075231 | 1 |
| ENSG00000262488.1  | TREATTXTPF-00547659 225mg  | Week12 | RP11-876f | pseudogene     | chr16 | 10934241  | 10935401  | - | 1161  | 11.47182 | 0.141436 | 0.64654  | 0.190418 | 3.395371 | 0.000778 | 0.07533  | 1 |
| ENSG00000168924.10 | TREATTXTPF-00547659 225mg  | Week12 | LETM1     | protein_coding | chr4  | 1813206   | 1857974   | + | 8184  | 1250.481 | 0        | 0.252174 | 0.074276 | 3.395066 | 0.000779 | 0.075331 | 1 |
| ENSG00000075399.8  | TREATTXTPF-00547659 75mg   | Week12 | VPS9D1    | protein_coding | chr16 | 89773542  | 89787394  | - | 3428  | 2928.834 | 0        | -0.28358 | 0.083535 | -3.39479 | 0.000779 | 0.075331 | 1 |
| ENSG00000112118.13 | TREATTXTPF-00547659 225mg  | Week12 | MCM3      | protein_coding | chr6  | 52128807  | 52149679  | - | 3650  | 2293.461 | 0        | 0.284666 | 0.083871 | 3.394104 | 0.000781 | 0.075436 | 1 |
| ENSG00000171843.11 | TREATTXTPF-00547659 225mg  | Week12 | MLLT3     | protein_coding | chr9  | 20341663  | 20622542  | - | 8129  | 638.7525 | 0        | 0.382649 | 0.112769 | 3.39321  | 0.000784 | 0.075561 | 1 |
| ENSG00000062524.11 | TREATTXTPF-00547659 225mg  | Week12 | LTK       | protein_coding | chr15 | 41795836  | 41806085  | - | 3490  | 317.1171 | 0        | 0.426879 | 0.125813 | 3.39296  | 0.000784 | 0.075561 | 1 |
| ENSG00000198690.5  | TREATTXTPF-00547659 225mg  | Week12 | FAN1      | protein_coding | chr15 | 31196055  | 31235311  | + | 6194  | 716.6464 | 0        | 0.395822 | 0.11667  | 3.392648 | 0.000785 | 0.075561 | 1 |
| ENSG00000007516.9  | TREATTXTPF-00547659 22.5mg | Week12 | BAIAP3    | protein_coding | chr16 | 1383602   | 1399439   | + | 6143  | 752.8044 | 0        | 0.369696 | 0.108975 | 3.392476 | 0.000786 | 0.075561 | 1 |
| ENSG00000213923.6  | TREATTXTPF-00547659 225mg  | Week12 | CSNK1E    | protein_coding | chr22 | 38686697  | 38794527  | - | 6699  | 1395.452 | 0        | 0.266344 | 0.078533 | 3.391499 | 0.000788 | 0.075563 | 1 |
| ENSG00000127152.13 | TREATTXTPF-00547659 225mg  | Week12 | BCL11B    | protein_coding | chr14 | 99635624  | 99737861  | - | 7855  | 3373.295 | 0        | 0.398761 | 0.117586 | 3.391228 | 0.000789 | 0.075563 | 1 |
| ENSG00000157483.4  | TREATTXTPF-00547659 225mg  | Week12 | MYO1E     | protein_coding | chr15 | 59427113  | 59665099  | - | 6626  | 386.8785 | 0        | 0.400641 | 0.118161 | 3.390631 | 0.000791 | 0.075563 | 1 |
| ENSG00000112787.8  | TREATTXTPF-00547659 225mg  | Week12 | FBRSL1    | protein_coding | chr12 | 133066137 | 133161774 | + | 9309  | 3954.023 | 0        | 0.218437 | 0.064424 | 3.390625 | 0.000791 | 0.075563 | 1 |
| ENSG00000211797.2  | TREATTXTPF-00547659 225mg  | Week12 | TRAV17    | TR_V_gene      | chr14 | 22465778  | 22466407  | + | 484   | 206.5215 | 0.003315 | 0.470606 | 0.138799 | 3.390548 | 0.000791 | 0.075563 | 1 |
| ENSG00000172831.7  | TREATTXTPF-00547659 225mg  | Week12 | CES2      | protein_coding | chr16 | 66968347  | 66978999  | + | 5343  | 1647.649 | 0        | 0.195713 | 0.057731 | 3.390063 | 0.000792 | 0.075563 | 1 |
| ENSG00000185436.7  | TREATTXTPF-00547659 225mg  | Week12 | IFNLR1    | protein_coding | chr1  | 24480647  | 24514449  | + | 4923  | 279.3746 | 0.001105 | 0.452489 | 0.133503 | 3.389346 | 0.000794 | 0.075563 | 1 |
| ENSG00000101079.16 | TREATTXTPF-00547659 225mg  | Week12 | NDRG3     | protein_coding | chr20 | 35280169  | 35374481  | - | 3248  | 2383.371 | 0        | 0.172067 | 0.05077  | 3.389148 | 0.000795 | 0.075563 | 1 |
| ENSG00000105298.9  | TREATTXTPF-00547659 225mg  | Week12 | CACTIN    | protein_coding | chr19 | 3610639   | 3626813   | - | 5952  | 1289.343 | 0        | 0.262338 | 0.077413 | 3.388798 | 0.000796 | 0.075563 | 1 |
| ENSG00000079691.15 | TREATTXTPF-00547659 225mg  | Week12 | LRRC16A   | protein_coding | chr6  | 25279306  | 25620758  | + | 6881  | 189.1967 | 0.00221  | 0.404816 | 0.119463 | 3.388626 | 0.000796 | 0.075563 | 1 |
| ENSG00000227191.2  | TREATTXTPF-00547659 75mg   | Week12 | TRGC2     | TR_C_gene      | chr7  | 38279181  | 38289173  | - | 1013  | 1486.147 | 0        | 0.395356 | 0.116675 | 3.388533 | 0.000797 | 0.075563 | 1 |
| ENSG00000104228.8  | TREATTXTPF-00547659 225mg  | Week12 | TRIM35    | protein_coding | chr8  | 27142404  | 27168836  | - | 4269  | 1093.491 | 0        | 0.281276 | 0.08301  | 3.388478 | 0.000797 | 0.075563 | 1 |
| ENSG00000128739.16 | TREATTXTPF-00547659 225mg  | Week12 | SNRPN     | protein_coding | chr15 | 25068794  | 25223870  | + | 3488  | 117.284  | 0.00442  | 0.459082 | 0.135486 | 3.388397 | 0.000797 | 0.075563 | 1 |
| ENSG00000169057.15 | TREATTXTPF-00547659 75mg   | Week12 | MECP2     | protein_coding | chrX  | 153287024 | 153363212 | - | 12556 | 5119.741 | 0        | 0.154892 | 0.045715 | 3.388203 | 0.000798 | 0.075563 | 1 |
| ENSG00000105221.12 | TREATTXTPF-00547659 225mg  | Week12 | AKT2      | protein_coding | chr19 | 40736224  | 40791443  | - | 15035 | 6905.663 | 0        | 0.140654 | 0.04152  | 3.387638 | 0.000799 | 0.075704 | 1 |
| ENSG00000137411.12 | TREATTXTPF-00547659 225mg  | Week12 | VARS2     | protein_coding | chr6  | 30876019  | 30894236  | + | 8448  | 794.3348 | 0        | 0.274594 | 0.081081 | 3.386644 | 0.000802 | 0.075777 | 1 |
| ENSG00000165632.7  | TREATTXTPF-00547659 225mg  | Week12 | TAF3      | protein_coding | chr10 | 7860467   | 8058590   | + | 4872  | 674.9967 | 0        | 0.254977 | 0.075293 | 3.386452 | 0.000802 | 0.075777 | 1 |
| ENSG00000260655.1  | TREATTXTPF-00547659 75mg   | Week12 | CTA-250D  | lincRNA        | chr22 | 42318027  | 42319104  | - | 1078  | 471.958  | 0.001105 | 0.409891 | 0.121038 | 3.386452 | 0.000802 | 0.075777 | 1 |
| ENSG00000119285.6  | TREATTXTPF-00547659 225mg  | Week12 | HEATR1    | protein_coding | chr1  | 236712305 | 236767804 | - | 9049  | 1270.113 | 0        | 0.324832 | 0.095934 | 3.385995 | 0.000804 | 0.075777 | 1 |
| ENSG00000196214.6  | TREATTXTPF-00547659 225mg  | Week12 | ZNF766    | protein_coding | chr19 | 52772824  | 52795977  | + | 4015  | 896      | 0        | 0.24427  | 0.072142 | 3.385943 | 0.000804 | 0.075777 | 1 |

|                     |                            |        |           |                   |       |           |             |       |          |          |          |          |          |          |          |   |
|---------------------|----------------------------|--------|-----------|-------------------|-------|-----------|-------------|-------|----------|----------|----------|----------|----------|----------|----------|---|
| ENSG00000131381.8   | TREATTXTPF-00547659 225mg  | Week12 | ZFYVE20   | protein_coding    | chr3  | 15111580  | 15140670 -  | 7921  | 1132.627 | 0        | 0.229873 | 0.067902 | 3.385382 | 0.000805 | 0.075842 | 1 |
| ENSG00000140718.14  | TREATTXTPF-00547659 225mg  | Week12 | FTO       | protein_coding    | chr16 | 53737875  | 54155853 +  | 12723 | 571.779  | 0.001105 | 0.446822 | 0.131996 | 3.385132 | 0.000806 | 0.075842 | 1 |
| ENSG00000233175.2   | TREATTXTPF-00547659 225mg  | Week12 | CTD-2020h | antisense         | chr17 | 43315395  | 43319101 -  | 2293  | 47.2453  | 0.011105 | 0.511805 | 0.151231 | 3.384267 | 0.000809 | 0.075916 | 1 |
| ENSG00000082516.8   | TREATTXTPF-00547659 225mg  | Week12 | GEMIN5    | protein_coding    | chr5  | 154266976 | 154317769 - | 5637  | 695.3746 | 0.001105 | 0.325123 | 0.09607  | 3.384219 | 0.000809 | 0.075916 | 1 |
| ENSG00000198846.5   | TREATTXTPF-00547659 75mg   | Week12 | TOX       | protein_coding    | chr8  | 59717977  | 60031767 -  | 4131  | 404.7204 | 0        | 0.392411 | 0.115985 | 3.383291 | 0.000811 | 0.075916 | 1 |
| ENSG00000042980.8   | TREATTXTPF-00547659 225mg  | Week12 | ADAM28    | protein_coding    | chr8  | 24151553  | 24216531 +  | 9351  | 735.4033 | 0.001105 | 0.425998 | 0.125919 | 3.383104 | 0.000812 | 0.075916 | 1 |
| ENSG00000165275.5   | TREATTXTPF-00547659 225mg  | Week12 | TRMT10B   | protein_coding    | chr9  | 37753804  | 37778969 +  | 2862  | 391.4265 | 0        | 0.276756 | 0.081807 | 3.383054 | 0.000812 | 0.075916 | 1 |
| ENSG00000154957.9   | TREATTXTPF-00547659 225mg  | Week12 | ZNF18     | protein_coding    | chr17 | 11880756  | 11900827 -  | 3006  | 1025.505 | 0        | 0.146176 | 0.04321  | 3.382912 | 0.000812 | 0.075916 | 1 |
| ENSG00000176715.11  | TREATTXTPF-00547659 225mg  | Week12 | ACSF3     | protein_coding    | chr16 | 89154783  | 89222254 +  | 11629 | 1888.072 | 0        | 0.225098 | 0.06654  | 3.38288  | 0.000813 | 0.075916 | 1 |
| ENSG00000128731.11  | TREATTXTPF-00547659 225mg  | Week12 | HERC2     | protein_coding    | chr15 | 28356186  | 28567298 -  | 20027 | 1299.457 | 0        | 0.339596 | 0.100408 | 3.382148 | 0.000815 | 0.076037 | 1 |
| ENSG00000172530.15  | TREATTXTPF-00547659 225mg  | Week12 | BANP      | protein_coding    | chr16 | 87982850  | 88110924 +  | 7679  | 1597.526 | 0        | 0.174465 | 0.051604 | 3.38086  | 0.000818 | 0.076205 | 1 |
| ENSG00000163125.11  | TREATTXTPF-00547659 225mg  | Week12 | RPRD2     | protein_coding    | chr1  | 150335567 | 150449042 + | 8738  | 2268.033 | 0        | 0.272929 | 0.08073  | 3.380779 | 0.000819 | 0.076205 | 1 |
| ENSG00000116455.9   | TREATTXTPF-00547659 225mg  | Week12 | WDR77     | protein_coding    | chr1  | 111982512 | 111991998 - | 2805  | 768.2265 | 0        | 0.262405 | 0.077619 | 3.380675 | 0.000819 | 0.076205 | 1 |
| ENSG00000114841.13  | TREATTXTPF-00547659 225mg  | Week12 | DNAH1     | protein_coding    | chr3  | 52350335  | 52434507 +  | 13872 | 1899.686 | 0        | 0.294659 | 0.087176 | 3.380062 | 0.000821 | 0.076294 | 1 |
| ENSG00000103091.10  | TREATTXTPF-00547659 225mg  | Week12 | WDR59     | protein_coding    | chr16 | 74907468  | 75034071 -  | 7218  | 1470.066 | 0        | 0.238011 | 0.070428 | 3.379478 | 0.000822 | 0.076314 | 1 |
| ENSG00000070610.10  | TREATTXTPF-00547659 225mg  | Week12 | GBA2      | protein_coding    | chr9  | 35736863  | 35749983 -  | 5079  | 3479.053 | 0        | 0.128903 | 0.038143 | 3.37943  | 0.000822 | 0.076314 | 1 |
| ENSG000000013725.10 | TREATTXTPF-00547659 225mg  | Week12 | CD6       | protein_coding    | chr11 | 60739115  | 60787849 +  | 5995  | 7929.793 | 0        | 0.365238 | 0.108103 | 3.378601 | 0.000825 | 0.076461 | 1 |
| ENSG00000065457.6   | TREATTXTPF-00547659 75mg   | Week12 | ADAT1     | protein_coding    | chr16 | 75630879  | 75657198 -  | 4486  | 773.9569 | 0        | 0.263115 | 0.077908 | 3.377266 | 0.000829 | 0.076479 | 1 |
| ENSG00000139675.10  | TREATTXTPF-00547659 225mg  | Week12 | HNRNPA1   | protein_coding    | chr13 | 53191605  | 53217919 +  | 2365  | 215.5481 | 0.00221  | 0.380422 | 0.112646 | 3.377154 | 0.000829 | 0.076479 | 1 |
| ENSG00000109111.10  | TREATTXTPF-00547659 225mg  | Week12 | SUPT6H    | protein_coding    | chr17 | 26989109  | 27029697 +  | 10615 | 6908.634 | 0        | 0.170039 | 0.050353 | 3.376911 | 0.00083  | 0.076479 | 1 |
| ENSG00000211788.2   | TREATTXTPF-00547659 75mg   | Week12 | TRAV13-1  | TR_V_gene         | chr14 | 22337020  | 22337546 +  | 360   | 281.547  | 0.001105 | 0.440452 | 0.130431 | 3.376886 | 0.00083  | 0.076479 | 1 |
| ENSG00000156804.3   | TREATTXTPF-00547659 75mg   | Week12 | FBXO32    | protein_coding    | chr8  | 124510129 | 124553446 - | 7395  | 872.9326 | 0        | 0.317015 | 0.093883 | 3.376698 | 0.00083  | 0.076479 | 1 |
| ENSG00000132153.10  | TREATTXTPF-00547659 225mg  | Week12 | DHX30     | protein_coding    | chr3  | 47844399  | 47891685 +  | 7735  | 2437.053 | 0        | 0.245795 | 0.0728   | 3.376301 | 0.000831 | 0.076479 | 1 |
| ENSG00000069188.12  | TREATTXTPF-00547659 225mg  | Week12 | SDK2      | protein_coding    | chr17 | 71330523  | 71640228 -  | 11607 | 182.2188 | 0.007735 | 0.503531 | 0.149142 | 3.376188 | 0.000832 | 0.076479 | 1 |
| ENSG00000163879.9   | TREATTXTPF-00547659 225mg  | Week12 | DNAL1     | protein_coding    | chr1  | 38022520  | 38032458 +  | 4456  | 3.534807 | 0.379006 | 0.507106 | 0.150231 | 3.375514 | 0.000834 | 0.076479 | 1 |
| ENSG00000122224.13  | TREATTXTPF-00547659 225mg  | Week12 | LY9       | protein_coding    | chr1  | 160765864 | 160798051 + | 9121  | 2326.803 | 0        | 0.354813 | 0.105117 | 3.375413 | 0.000834 | 0.076479 | 1 |
| ENSG00000143569.14  | TREATTXTPF-00547659 225mg  | Week12 | UBAP2L    | protein_coding    | chr1  | 154192655 | 154243986 + | 7503  | 5578.476 | 0        | 0.189589 | 0.056169 | 3.375333 | 0.000834 | 0.076479 | 1 |
| ENSG00000143167.7   | TREATTXTPF-00547659 225mg  | Week12 | GPA33     | protein_coding    | chr1  | 167022073 | 167059868 - | 3003  | 439.5072 | 0        | 0.400011 | 0.118512 | 3.375275 | 0.000834 | 0.076479 | 1 |
| ENSG00000213588.4   | TREATTXTPF-00547659 225mg  | Week12 | ZBTB9     | protein_coding    | chr6  | 33422356  | 33425325 +  | 2716  | 491.4674 | 0        | 0.300325 | 0.08898  | 3.3752   | 0.000835 | 0.076479 | 1 |
| ENSG00000143379.8   | TREATTXTPF-00547659 225mg  | Week12 | SETDB1    | protein_coding    | chr1  | 150898739 | 150937213 + | 7086  | 2979.06  | 0        | 0.145117 | 0.043005 | 3.374427 | 0.000837 | 0.076613 | 1 |
| ENSG00000145687.11  | TREATTXTPF-00547659 225mg  | Week12 | SSBP2     | protein_coding    | chr5  | 80708840  | 81047616 -  | 11284 | 923.4133 | 0        | 0.277048 | 0.082145 | 3.372664 | 0.000842 | 0.076728 | 1 |
| ENSG00000136542.4   | TREATTXTPF-00547659 225mg  | Week12 | GALNT5    | protein_coding    | chr2  | 158114110 | 158170723 + | 6818  | 11.19669 | 0.19779  | -0.65569 | 0.194418 | -3.37257 | 0.000842 | 0.076728 | 1 |
| ENSG00000104921.10  | TREATTXTPF-00547659 75mg   | Week12 | FCER2     | protein_coding    | chr19 | 7753644   | 7767032 -   | 2367  | 1294.491 | 0        | 0.4091   | 0.121307 | 3.372432 | 0.000843 | 0.076728 | 1 |
| ENSG00000110042.3   | TREATTXTPF-00547659 75mg   | Week12 | DTX4      | protein_coding    | chr11 | 58938903  | 58976060 +  | 6072  | 687.9337 | 0        | 0.309076 | 0.091653 | 3.372242 | 0.000843 | 0.076728 | 1 |
| ENSG00000074755.10  | TREATTXTPF-00547659 225mg  | Week12 | ZZEF1     | protein_coding    | chr17 | 3907739   | 4046314 -   | 15878 | 5941.567 | 0        | 0.205661 | 0.060987 | 3.372187 | 0.000844 | 0.076728 | 1 |
| ENSG00000214595.7   | TREATTXTPF-00547659 225mg  | Week12 | EML6      | protein_coding    | chr2  | 54950636  | 55199157 +  | 14422 | 75.75801 | 0.00663  | 0.57759  | 0.171302 | 3.371762 | 0.000845 | 0.076728 | 1 |
| ENSG00000104814.8   | TREATTXTPF-00547659 225mg  | Week12 | MAP4K1    | protein_coding    | chr19 | 39078281  | 39109522 -  | 3953  | 4065.93  | 0        | 0.307324 | 0.091151 | 3.371607 | 0.000845 | 0.076728 | 1 |
| ENSG00000114861.14  | TREATTXTPF-00547659 225mg  | Week12 | FOXP1     | protein_coding    | chr3  | 71003844  | 71633140 +  | 13359 | 3135.062 | 0        | 0.233132 | 0.069146 | 3.371596 | 0.000845 | 0.076728 | 1 |
| ENSG00000133884.5   | TREATTXTPF-00547659 22.5mg | Week12 | DPF2      | protein_coding    | chr11 | 65101225  | 65120720 +  | 7715  | 4098.845 | 0        | 0.151388 | 0.044902 | 3.371523 | 0.000846 | 0.076728 | 1 |
| ENSG00000263235.1   | TREATTXTPF-00547659 225mg  | Week12 | RP11-461f | sense_overlapping | chr16 | 3700637   | 3701704 -   | 1068  | 16.44972 | 0.033149 | 0.506974 | 0.150404 | 3.370757 | 0.000848 | 0.07686  | 1 |
| ENSG00000144468.12  | TREATTXTPF-00547659 225mg  | Week12 | RHBDD1    | protein_coding    | chr2  | 227700297 | 227863931 + | 6926  | 977.9823 | 0        | 0.236027 | 0.07003  | 3.370374 | 0.000849 | 0.07689  | 1 |
| ENSG00000103510.15  | TREATTXTPF-00547659 225mg  | Week12 | KAT8      | protein_coding    | chr16 | 31127075  | 31142714 +  | 4334  | 3243.725 | 0        | 0.130069 | 0.038599 | 3.369759 | 0.000851 | 0.076982 | 1 |
| ENSG00000122512.10  | TREATTXTPF-00547659 225mg  | Week12 | PMS2      | protein_coding    | chr7  | 6012870   | 6048756 -   | 3936  | 384.821  | 0        | 0.300453 | 0.089185 | 3.368874 | 0.000853 | 0.077086 | 1 |
| ENSG00000087263.12  | TREATTXTPF-00547659 225mg  | Week12 | OGFOD1    | protein_coding    | chr16 | 56485402  | 56513012 +  | 5806  | 1150.377 | 0        | 0.273056 | 0.081064 | 3.368405 | 0.000855 | 0.077086 | 1 |
| ENSG00000137413.11  | TREATTXTPF-00547659 225mg  | Week12 | TAF8      | protein_coding    | chr6  | 42018251  | 42055199 +  | 9286  | 1921.267 | 0        | 0.240779 | 0.071484 | 3.368313 | 0.000855 | 0.077086 | 1 |
| ENSG00000111087.5   | TREATTXTPF-00547659 225mg  | Week12 | GLI1      | protein_coding    | chr12 | 57853918  | 57866045 +  | 4204  | 24.78674 | 0.025414 | 0.527831 | 0.156709 | 3.368225 | 0.000855 | 0.077086 | 1 |
| ENSG00000198700.5   | TREATTXTPF-00547659 225mg  | Week12 | IPO9      | protein_coding    | chr1  | 201798269 | 201853422 + | 11915 | 1882.585 | 0        | 0.263656 | 0.078284 | 3.367928 | 0.000856 | 0.077086 | 1 |
| ENSG00000153107.7   | TREATTXTPF-00547659 225mg  | Week12 | ANAPC1    | protein_coding    | chr2  | 112523848 | 112642267 - | 13324 | 679.3801 | 0        | 0.346976 | 0.10303  | 3.367715 | 0.000857 | 0.077086 | 1 |
| ENSG00000077984.4   | TREATTXTPF-00547659 225mg  | Week12 | CST7      | protein_coding    | chr20 | 24929866  | 24940564 +  | 930   | 18414.73 | 0        | -0.50683 | 0.15051  | -3.36742 | 0.000858 | 0.077086 | 1 |
| ENSG00000104299.10  | TREATTXTPF-00547659 225mg  | Week12 | INTS9     | protein_coding    | chr8  | 28625178  | 28747759 -  | 4905  | 992.3215 | 0        | 0.226863 | 0.067378 | 3.367011 | 0.000859 | 0.077086 | 1 |
| ENSG00000251450.1   | TREATTXTPF-00547659 225mg  | Week12 | CTC-45916 | antisense         | chr5  | 80243516  | 80256726 -  | 1166  | 10.0442  | 0.113812 | 0.579508 | 0.172131 | 3.366656 | 0.00086  | 0.077086 | 1 |
| ENSG00000003249.9   | TREATTXTPF-00547659 75mg   | Week12 | DBNDD1    | protein_coding    | chr16 | 90071273  | 90086536 -  | 3522  | 207.4994 | 0.001105 | 0.441766 | 0.131229 | 3.366383 | 0.000861 | 0.077086 | 1 |
| ENSG00000197635.5   | TREATTXTPF-00547659 225mg  | Week12 | DPP4      | protein_coding    | chr2  | 162848751 | 162931052 - | 5009  | 1172.011 | 0        | 0.372534 | 0.110667 | 3.366277 | 0.000861 | 0.077086 | 1 |

|                    |                            |        |           |                |       |           |             |       |          |          |          |          |          |          |          |   |
|--------------------|----------------------------|--------|-----------|----------------|-------|-----------|-------------|-------|----------|----------|----------|----------|----------|----------|----------|---|
| ENSG00000053372.4  | TREATTXTPF-00547659 225mg  | Week12 | MRTO4     | protein_coding | chr1  | 19578033  | 19586622 +  | 2822  | 644.0718 | 0        | 0.28805  | 0.085575 | 3.366039 | 0.000862 | 0.077086 | 1 |
| ENSG00000130921.3  | TREATTXTPF-00547659 225mg  | Week12 | C12orf65  | protein_coding | chr12 | 123717463 | 123742506 + | 7090  | 562.1735 | 0        | 0.328999 | 0.097746 | 3.365845 | 0.000862 | 0.077086 | 1 |
| ENSG00000112685.9  | TREATTXTPF-00547659 225mg  | Week12 | EXOC2     | protein_coding | chr6  | 485133    | 693117 -    | 4989  | 1624.757 | 0        | 0.278368 | 0.082723 | 3.365057 | 0.000865 | 0.077148 | 1 |
| ENSG00000107021.11 | TREATTXTPF-00547659 75mg   | Week12 | TBC1D13   | protein_coding | chr9  | 131549483 | 131572711 + | 3982  | 1851.701 | 0        | 0.167659 | 0.049825 | 3.364932 | 0.000865 | 0.077148 | 1 |
| ENSG00000196781.9  | TREATTXTPF-00547659 225mg  | Week12 | TLE1      | protein_coding | chr9  | 84198598  | 84304220 -  | 4906  | 396.6597 | 0        | 0.321262 | 0.095486 | 3.364506 | 0.000866 | 0.077148 | 1 |
| ENSG00000103489.7  | TREATTXTPF-00547659 75mg   | Week12 | XYLT1     | protein_coding | chr16 | 17195626  | 17564738 -  | 11004 | 1707.814 | 0        | 0.310104 | 0.092173 | 3.36437  | 0.000867 | 0.077148 | 1 |
| ENSG00000162402.8  | TREATTXTPF-00547659 225mg  | Week12 | USP24     | protein_coding | chr1  | 55532032  | 55680786 -  | 11708 | 3434.558 | 0        | 0.303291 | 0.090151 | 3.364253 | 0.000867 | 0.077148 | 1 |
| ENSG00000182944.13 | TREATTXTPF-00547659 225mg  | Week12 | EWSR1     | protein_coding | chr22 | 29663998  | 29696515 +  | 10327 | 11098.72 | 0        | 0.138182 | 0.041081 | 3.363653 | 0.000869 | 0.077148 | 1 |
| ENSG00000183208.8  | TREATTXTPF-00547659 225mg  | Week12 | GDPGP1    | protein_coding | chr15 | 90777040  | 90785315 +  | 2038  | 94.83425 | 0.00442  | 0.296995 | 0.088298 | 3.363548 | 0.000869 | 0.077148 | 1 |
| ENSG00000255569.1  | TREATTXTPF-00547659 22.5mg | Week12 | TRAV1-1   | TR_V_gene      | chr14 | 22089991  | 22090720 +  | 392   | 52.61989 | 0.014365 | 0.523662 | 0.155694 | 3.363398 | 0.00087  | 0.077148 | 1 |
| ENSG00000125124.7  | TREATTXTPF-00547659 225mg  | Week12 | BBS2      | protein_coding | chr16 | 56500748  | 56554195 -  | 8337  | 1177.906 | 0        | 0.306951 | 0.091275 | 3.362917 | 0.000871 | 0.077148 | 1 |
| ENSG00000163013.7  | TREATTXTPF-00547659 225mg  | Week12 | FBXO41    | protein_coding | chr2  | 73481810  | 73511559 -  | 8104  | 959.4652 | 0        | 0.304837 | 0.090647 | 3.362916 | 0.000871 | 0.077148 | 1 |
| ENSG00000092820.13 | TREATTXTPF-00547659 225mg  | Week12 | EZR       | protein_coding | chr6  | 159186773 | 159240444 - | 3336  | 8412.466 | 0        | 0.261014 | 0.077621 | 3.362656 | 0.000872 | 0.077148 | 1 |
| ENSG00000112592.8  | TREATTXTPF-00547659 225mg  | Week12 | TBP       | protein_coding | chr6  | 170863390 | 170881958 + | 2038  | 640.4122 | 0        | 0.268308 | 0.079805 | 3.362049 | 0.000874 | 0.07724  | 1 |
| ENSG00000267247.1  | TREATTXTPF-00547659 7.5mg  | Week12 | RP11-64C1 | lincRNA        | chr18 | 12230410  | 12231572 -  | 485   | 2.104972 | 0.564641 | 0.465862 | 0.138606 | 3.361044 | 0.000877 | 0.077439 | 1 |
| ENSG00000168421.8  | TREATTXTPF-00547659 225mg  | Week12 | RHOH      | protein_coding | chr4  | 40192673  | 40248587 +  | 6594  | 2419.71  | 0        | 0.33121  | 0.098568 | 3.360226 | 0.00088  | 0.077538 | 1 |
| ENSG00000179041.2  | TREATTXTPF-00547659 225mg  | Week12 | RRS1      | protein_coding | chr8  | 67341263  | 67342966 +  | 1704  | 470.642  | 0        | 0.297408 | 0.088518 | 3.359843 | 0.000881 | 0.077538 | 1 |
| ENSG00000126464.9  | TREATTXTPF-00547659 225mg  | Week12 | PRR12     | protein_coding | chr19 | 50094900  | 50129696 +  | 7093  | 2250.886 | 0        | 0.31359  | 0.093336 | 3.359785 | 0.000881 | 0.077538 | 1 |
| ENSG00000269918.1  | TREATTXTPF-00547659 225mg  | Week12 | AF131215  | sense_intronic | chr8  | 10962201  | 10962414 -  | 2014  | 166.3238 | 0.003315 | 0.412008 | 0.122649 | 3.359233 | 0.000883 | 0.077538 | 1 |
| ENSG00000144749.9  | TREATTXTPF-00547659 225mg  | Week12 | LRIG1     | protein_coding | chr3  | 66429221  | 66551687 -  | 7032  | 1044.156 | 0        | 0.401224 | 0.119445 | 3.359082 | 0.000883 | 0.077538 | 1 |
| ENSG00000120658.8  | TREATTXTPF-00547659 225mg  | Week12 | ENOX1     | protein_coding | chr13 | 43787654  | 44361044 -  | 3518  | 1.145856 | 0.740331 | 0.372201 | 0.110804 | 3.35908  | 0.000883 | 0.077538 | 1 |
| ENSG00000273365.1  | TREATTXTPF-00547659 75mg   | Week12 | RP11-466f | lincRNA        | chr1  | 165675793 | 165676521 - | 729   | 2.771271 | 0.435359 | 0.446752 | 0.13301  | 3.358796 | 0.000884 | 0.077543 | 1 |
| ENSG00000141568.15 | TREATTXTPF-00547659 225mg  | Week12 | FOXK2     | protein_coding | chr17 | 80477589  | 80602538 +  | 7780  | 1728.394 | 0        | 0.2055   | 0.061191 | 3.358343 | 0.000885 | 0.077594 | 1 |
| ENSG00000133706.13 | TREATTXTPF-00547659 225mg  | Week12 | LARS      | protein_coding | chr5  | 145492601 | 145562223 - | 8118  | 2891.01  | 0        | 0.282378 | 0.084093 | 3.357911 | 0.000887 | 0.077623 | 1 |
| ENSG00000163958.9  | TREATTXTPF-00547659 75mg   | Week12 | ZDHHC19   | protein_coding | chr3  | 195924320 | 195938308 - | 2432  | 354.9381 | 0.001105 | -0.80767 | 0.240541 | -3.35771 | 0.000887 | 0.077623 | 1 |
| ENSG00000137496.13 | TREATTXTPF-00547659 225mg  | Week12 | IL18BP    | protein_coding | chr11 | 71709587  | 71716761 +  | 4323  | 741.6884 | 0        | 0.262829 | 0.078288 | 3.357192 | 0.000889 | 0.077636 | 1 |
| ENSG00000154222.10 | TREATTXTPF-00547659 225mg  | Week12 | CC2D1B    | protein_coding | chr1  | 52811395  | 52831865 -  | 7491  | 2192.64  | 0        | 0.177449 | 0.052868 | 3.356478 | 0.000891 | 0.077636 | 1 |
| ENSG00000225948.2  | TREATTXTPF-00547659 225mg  | Week12 | RP11-554l | lincRNA        | chr10 | 6660678   | 6667308 +   | 500   | 50.2442  | 0.01768  | 0.568117 | 0.16927  | 3.356285 | 0.000892 | 0.077636 | 1 |
| ENSG0000010310.4   | TREATTXTPF-00547659 225mg  | Week12 | GIPR      | protein_coding | chr19 | 46171502  | 46186982 +  | 4736  | 130.6133 | 0.00221  | 0.475123 | 0.141563 | 3.356269 | 0.000892 | 0.077636 | 1 |
| ENSG00000143374.10 | TREATTXTPF-00547659 225mg  | Week12 | TARS2     | protein_coding | chr1  | 150459887 | 150480078 + | 4023  | 788.9713 | 0        | 0.251069 | 0.074807 | 3.356238 | 0.000892 | 0.077636 | 1 |
| ENSG00000076555.11 | TREATTXTPF-00547659 225mg  | Week12 | ACACB     | protein_coding | chr12 | 109554400 | 109706031 + | 14159 | 646.3724 | 0        | 0.294475 | 0.087744 | 3.356073 | 0.000892 | 0.077636 | 1 |
| ENSG00000164949.3  | TREATTXTPF-00547659 225mg  | Week12 | GEM       | protein_coding | chr8  | 95261481  | 95274578 -  | 2648  | 5.637569 | 0.299448 | 0.558799 | 0.166529 | 3.355559 | 0.000894 | 0.077704 | 1 |
| ENSG00000187010.14 | TREATTXTPF-00547659 225mg  | Week12 | RHD       | protein_coding | chr1  | 25598884  | 25656936 +  | 3313  | 98.26077 | 0.064088 | -0.67285 | 0.200574 | -3.35462 | 0.000897 | 0.077888 | 1 |
| ENSG00000248703.2  | TREATTXTPF-00547659 225mg  | Week12 | RP11-495h | lincRNA        | chr12 | 131780655 | 131782517 - | 1315  | 2.014365 | 0.577901 | 0.409526 | 0.122097 | 3.354099 | 0.000899 | 0.077957 | 1 |
| ENSG00000211785.1  | TREATTXTPF-00547659 225mg  | Week12 | TRAV12-1  | TR_V_gene      | chr14 | 22309422  | 22309956 +  | 340   | 201.0718 | 0.00221  | 0.513317 | 0.153072 | 3.353441 | 0.000901 | 0.078065 | 1 |
| ENSG00000186056.5  | TREATTXTPF-00547659 225mg  | Week12 | MAPT1-A5  | antisense      | chr1  | 31191351  | 31199674 +  | 4024  | 141.8917 | 0.001105 | 0.427965 | 0.127643 | 3.352822 | 0.000903 | 0.078071 | 1 |
| ENSG00000165795.16 | TREATTXTPF-00547659 225mg  | Week12 | NDRG2     | protein_coding | chr14 | 21484922  | 21539031 -  | 7550  | 433.4541 | 0.001105 | 0.391718 | 0.116837 | 3.352689 | 0.000903 | 0.078071 | 1 |
| ENSG00000156697.8  | TREATTXTPF-00547659 225mg  | Week12 | UTP14A    | protein_coding | chrX  | 129040097 | 129063737 + | 4087  | 814.4343 | 0        | 0.257403 | 0.076776 | 3.352631 | 0.000903 | 0.078071 | 1 |
| ENSG00000250251.2  | TREATTXTPF-00547659 225mg  | Week12 | PKD1P6    | pseudogene     | chr16 | 15219099  | 15248421 -  | 6015  | 101.2961 | 0.01105  | 0.546387 | 0.162986 | 3.352353 | 0.000904 | 0.078076 | 1 |
| ENSG00000267278.1  | TREATTXTPF-00547659 225mg  | Week12 | MAP3K14   | antisense      | chr17 | 43325292  | 43345997 +  | 3775  | 122.7083 | 0.00442  | 0.486453 | 0.145135 | 3.351735 | 0.000906 | 0.078129 | 1 |
| ENSG00000103351.8  | TREATTXTPF-00547659 225mg  | Week12 | CLUAP1    | protein_coding | chr16 | 3550924   | 3589048 +   | 7798  | 367.7182 | 0.001105 | 0.359685 | 0.107316 | 3.351633 | 0.000906 | 0.078129 | 1 |
| ENSG00000104814.8  | TREATTXTPF-00547659 75mg   | Week12 | MAP4K1    | protein_coding | chr19 | 39078281  | 39109522 -  | 3953  | 4065.93  | 0        | 0.298191 | 0.089001 | 3.350425 | 0.00091  | 0.078376 | 1 |
| ENSG00000011007.8  | TREATTXTPF-00547659 225mg  | Week12 | TCEB3     | protein_coding | chr1  | 24069645  | 24088549 +  | 5391  | 1978.545 | 0        | 0.233727 | 0.06977  | 3.349977 | 0.000911 | 0.078376 | 1 |
| ENSG00000168056.10 | TREATTXTPF-00547659 225mg  | Week12 | LTBP3     | protein_coding | chr11 | 65306276  | 65326401 -  | 10298 | 2101.234 | 0        | 0.372572 | 0.111217 | 3.349943 | 0.000912 | 0.078376 | 1 |
| ENSG00000089091.12 | TREATTXTPF-00547659 225mg  | Week12 | DZANK1    | protein_coding | chr20 | 18364011  | 18447925 -  | 6637  | 75.16133 | 0.003315 | 0.388108 | 0.115892 | 3.348893 | 0.000915 | 0.078592 | 1 |
| ENSG00000213995.7  | TREATTXTPF-00547659 225mg  | Week12 | CARKD     | protein_coding | chr13 | 111267881 | 111292340 + | 3540  | 741.6309 | 0        | 0.319165 | 0.095322 | 3.348291 | 0.000917 | 0.078685 | 1 |
| ENSG00000163617.6  | TREATTXTPF-00547659 225mg  | Week12 | KIAA1407  | protein_coding | chr3  | 113682984 | 113775460 - | 5303  | 285.2619 | 0.001105 | 0.424271 | 0.12673  | 3.34784  | 0.000918 | 0.078737 | 1 |
| ENSG00000183624.9  | TREATTXTPF-00547659 75mg   | Week12 | HMCES     | protein_coding | chr3  | 128997671 | 129025029 + | 2783  | 1864.365 | 0        | 0.218854 | 0.065385 | 3.34717  | 0.00092  | 0.078825 | 1 |
| ENSG00000137817.12 | TREATTXTPF-00547659 225mg  | Week12 | PARP6     | protein_coding | chr15 | 72533522  | 72565340 -  | 7696  | 2004.556 | 0        | 0.199106 | 0.059488 | 3.346999 | 0.000921 | 0.078825 | 1 |
| ENSG00000169635.5  | TREATTXTPF-00547659 225mg  | Week12 | HIC2      | protein_coding | chr22 | 21771693  | 21805752 +  | 7219  | 442.3017 | 0        | 0.298769 | 0.089283 | 3.346305 | 0.000923 | 0.078944 | 1 |
| ENSG00000105875.9  | TREATTXTPF-00547659 225mg  | Week12 | WDR91     | protein_coding | chr7  | 134868590 | 134896316 - | 6063  | 1316.558 | 0        | 0.213417 | 0.063786 | 3.345832 | 0.000925 | 0.078995 | 1 |
| ENSG00000167333.8  | TREATTXTPF-00547659 225mg  | Week12 | TRIM68    | protein_coding | chr11 | 4619902   | 4629489 -   | 4282  | 557.5591 | 0        | 0.34231  | 0.102316 | 3.345603 | 0.000925 | 0.078995 | 1 |
| ENSG00000163520.9  | TREATTXTPF-00547659 75mg   | Week12 | FBLN2     | protein_coding | chr3  | 13573824  | 13679922 +  | 4996  | 93.69613 | 0.005525 | 0.502748 | 0.150301 | 3.344948 | 0.000928 | 0.079103 | 1 |

|                    |                            |        |           |                      |       |           |           |   |       |          |          |          |          |          |          |          |   |
|--------------------|----------------------------|--------|-----------|----------------------|-------|-----------|-----------|---|-------|----------|----------|----------|----------|----------|----------|----------|---|
| ENSG00000168763.11 | TREATTXTPF-00547659 75mg   | Week12 | CNNM3     | protein_coding       | chr2  | 97481982  | 97499648  | + | 4416  | 1500.319 | 0        | 0.205579 | 0.061468 | 3.34446  | 0.000929 | 0.079166 | 1 |
| ENSG00000174669.7  | TREATTXTPF-00547659 225mg  | Week12 | SLC29A2   | protein_coding       | chr11 | 66129992  | 66139685  | - | 2720  | 175.7282 | 0.00221  | 0.423322 | 0.126589 | 3.344073 | 0.00093  | 0.079181 | 1 |
| ENSG00000157429.11 | TREATTXTPF-00547659 225mg  | Week12 | ZNF19     | protein_coding       | chr16 | 71498453  | 71598992  | - | 7983  | 81.57348 | 0.003315 | 0.400715 | 0.119835 | 3.34389  | 0.000931 | 0.079181 | 1 |
| ENSG00000227354.2  | TREATTXTPF-00547659 225mg  | Week12 | RBM26-AS  | antisense            | chr13 | 79980444  | 79998463  | + | 3747  | 35.15249 | 0.018785 | 0.592651 | 0.177258 | 3.343445 | 0.000932 | 0.079193 | 1 |
| ENSG00000207808.1  | TREATTXTPF-00547659 22.5mg | Week12 | MIR27A    | miRNA                | chr19 | 13947254  | 13947331  | - | 78    | 45.64862 | 0.012155 | 0.582562 | 0.174246 | 3.34333  | 0.000933 | 0.079193 | 1 |
| ENSG00000117643.10 | TREATTXTPF-00547659 225mg  | Week12 | MAN1C1    | protein_coding       | chr1  | 25943959  | 26112698  | + | 9014  | 1044.16  | 0        | 0.362623 | 0.10847  | 3.343064 | 0.000934 | 0.079195 | 1 |
| ENSG00000100139.9  | TREATTXTPF-00547659 225mg  | Week12 | MICALL1   | protein_coding       | chr22 | 38301664  | 38338829  | + | 5968  | 1229.368 | 0        | 0.215116 | 0.064359 | 3.34242  | 0.000936 | 0.079302 | 1 |
| ENSG00000132670.16 | TREATTXTPF-00547659 225mg  | Week12 | PTPRA     | protein_coding       | chr20 | 2844830   | 3019722   | + | 4509  | 3808.664 | 0        | 0.177059 | 0.052988 | 3.34148  | 0.000939 | 0.07949  | 1 |
| ENSG00000135469.9  | TREATTXTPF-00547659 225mg  | Week12 | COX10A    | protein_coding       | chr12 | 56660642  | 56664750  | + | 3243  | 343.9171 | 0.001105 | 0.37832  | 0.113249 | 3.340605 | 0.000942 | 0.079661 | 1 |
| ENSG00000006695.6  | TREATTXTPF-00547659 225mg  | Week12 | COX10     | protein_coding       | chr17 | 13972813  | 14111994  | + | 3172  | 502.2674 | 0        | 0.261385 | 0.078256 | 3.34015  | 0.000943 | 0.079663 | 1 |
| ENSG00000164061.4  | TREATTXTPF-00547659 225mg  | Week12 | BSN       | protein_coding       | chr3  | 49591922  | 49708978  | + | 16225 | 7.481768 | 0.161326 | 0.554207 | 0.165959 | 3.339424 | 0.000946 | 0.079663 | 1 |
| ENSG00000134452.15 | TREATTXTPF-00547659 225mg  | Week12 | FBXO18    | protein_coding       | chr10 | 5931535   | 5979556   | + | 6817  | 3195.512 | 0        | 0.158517 | 0.047472 | 3.339155 | 0.000946 | 0.079663 | 1 |
| ENSG00000065000.11 | TREATTXTPF-00547659 225mg  | Week12 | AP3D1     | protein_coding       | chr19 | 2100988   | 2164464   | - | 8618  | 5634.48  | 0        | 0.173464 | 0.051955 | 3.338723 | 0.000948 | 0.079663 | 1 |
| ENSG00000173064.6  | TREATTXTPF-00547659 225mg  | Week12 | HECTD4    | protein_coding       | chr12 | 11259792  | 112819896 | + | 21225 | 2158.556 | 0        | 0.270576 | 0.08105  | 3.338388 | 0.000949 | 0.079663 | 1 |
| ENSG00000103322.11 | TREATTXTPF-00547659 225mg  | Week12 | NISCH     | protein_coding       | chr3  | 52489134  | 52527087  | + | 9161  | 4785.603 | 0        | 0.206414 | 0.061833 | 3.338224 | 0.000949 | 0.079663 | 1 |
| ENSG00000101191.12 | TREATTXTPF-00547659 225mg  | Week12 | DIDO1     | protein_coding       | chr20 | 61509090  | 61569304  | - | 13281 | 4629.666 | 0        | 0.236175 | 0.070764 | 3.337479 | 0.000952 | 0.079663 | 1 |
| ENSG00000127191.13 | TREATTXTPF-00547659 75mg   | Week12 | TRAF2     | protein_coding       | chr9  | 139776364 | 139821059 | + | 3819  | 837.5989 | 0        | 0.245748 | 0.073637 | 3.337268 | 0.000953 | 0.079663 | 1 |
| ENSG00000149262.12 | TREATTXTPF-00547659 225mg  | Week12 | INTS4     | protein_coding       | chr11 | 77589766  | 77705724  | + | 6074  | 1509.365 | 0        | 0.180094 | 0.05397  | 3.336951 | 0.000954 | 0.079663 | 1 |
| ENSG00000166897.10 | TREATTXTPF-00547659 225mg  | Week12 | ELFN2     | protein_coding       | chr22 | 37764000  | 37823505  | - | 8782  | 12.53149 | 0.060773 | 0.551102 | 0.165172 | 3.336533 | 0.000955 | 0.079663 | 1 |
| ENSG00000175189.3  | TREATTXTPF-00547659 225mg  | Week12 | INHBC     | protein_coding       | chr12 | 57828543  | 57844611  | + | 1992  | 0.914917 | 0.79116  | 0.349493 | 0.10475  | 3.336441 | 0.000955 | 0.079663 | 1 |
| ENSG00000103356.11 | TREATTXTPF-00547659 225mg  | Week12 | EARS2     | protein_coding       | chr16 | 23533335  | 23569052  | - | 5730  | 490.0829 | 0        | 0.342246 | 0.102588 | 3.336126 | 0.000956 | 0.079663 | 1 |
| ENSG00000167536.9  | TREATTXTPF-00547659 225mg  | Week12 | DHRS13    | protein_coding       | chr17 | 27224799  | 27230089  | - | 2944  | 3212.873 | 0        | -0.3319  | 0.099493 | -3.33592 | 0.000957 | 0.079663 | 1 |
| ENSG00000135905.14 | TREATTXTPF-00547659 225mg  | Week12 | DOCK10    | protein_coding       | chr2  | 225629807 | 225907162 | - | 11065 | 3803.077 | 0        | 0.388548 | 0.116482 | 3.335681 | 0.000958 | 0.079663 | 1 |
| ENSG00000272734.1  | TREATTXTPF-00547659 225mg  | Week12 | ADIRF-AS1 | processed_transcript | chr10 | 88725102  | 88731068  | - | 5748  | 104.5547 | 0.00884  | 0.464151 | 0.139182 | 3.334845 | 0.000961 | 0.079663 | 1 |
| ENSG00000206053.8  | TREATTXTPF-00547659 225mg  | Week12 | HN1L      | protein_coding       | chr16 | 1728257   | 1752281   | + | 4768  | 1086.57  | 0        | 0.269377 | 0.080777 | 3.334822 | 0.000961 | 0.079663 | 1 |
| ENSG00000101654.13 | TREATTXTPF-00547659 225mg  | Week12 | RNMT      | protein_coding       | chr18 | 13726659  | 13764557  | + | 6982  | 1901.586 | 0        | 0.291374 | 0.087379 | 3.334605 | 0.000961 | 0.079663 | 1 |
| ENSG00000117682.12 | TREATTXTPF-00547659 225mg  | Week12 | DHDDS     | protein_coding       | chr1  | 26758773  | 26797785  | + | 5596  | 922.8221 | 0        | 0.190914 | 0.057254 | 3.334539 | 0.000962 | 0.079663 | 1 |
| ENSG00000166949.11 | TREATTXTPF-00547659 225mg  | Week12 | SMAD3     | protein_coding       | chr15 | 67356101  | 67487533  | + | 9113  | 2674.708 | 0        | 0.332375 | 0.099679 | 3.334462 | 0.000962 | 0.079663 | 1 |
| ENSG00000172530.15 | TREATTXTPF-00547659 22.5mg | Week12 | BANP      | protein_coding       | chr16 | 87982850  | 88110924  | + | 7679  | 1597.526 | 0        | 0.169643 | 0.050886 | 3.333767 | 0.000964 | 0.079663 | 1 |
| ENSG00000147140.11 | TREATTXTPF-00547659 225mg  | Week12 | NONO      | protein_coding       | chrX  | 70503042  | 70521018  | + | 5292  | 8868.591 | 0        | 0.196736 | 0.059013 | 3.333756 | 0.000964 | 0.079663 | 1 |
| ENSG00000168795.4  | TREATTXTPF-00547659 225mg  | Week12 | ZBTB5     | protein_coding       | chr9  | 37438111  | 37465396  | - | 4627  | 583.4033 | 0        | 0.370214 | 0.111053 | 3.333675 | 0.000965 | 0.079663 | 1 |
| ENSG00000167034.9  | TREATTXTPF-00547659 225mg  | Week12 | NKX3-1    | protein_coding       | chr8  | 23536206  | 23540440  | - | 3271  | 228.505  | 0.00442  | 0.514982 | 0.154508 | 3.333039 | 0.000967 | 0.079663 | 1 |
| ENSG00000130559.14 | TREATTXTPF-00547659 225mg  | Week12 | CAMSAP1   | protein_coding       | chr9  | 138700333 | 138799074 | - | 8642  | 839.4354 | 0        | 0.294458 | 0.088349 | 3.332895 | 0.000967 | 0.079663 | 1 |
| ENSG00000100038.15 | TREATTXTPF-00547659 225mg  | Week12 | TOP3B     | protein_coding       | chr22 | 22311397  | 22337213  | - | 6641  | 986.3448 | 0        | 0.236995 | 0.07111  | 3.332776 | 0.000968 | 0.079663 | 1 |
| ENSG00000100403.10 | TREATTXTPF-00547659 225mg  | Week12 | ZC3H7B    | protein_coding       | chr22 | 41697526  | 41756151  | + | 10525 | 2421.276 | 0        | 0.29929  | 0.089809 | 3.33252  | 0.000968 | 0.079663 | 1 |
| ENSG00000196700.3  | TREATTXTPF-00547659 225mg  | Week12 | ZNF512B   | protein_coding       | chr20 | 62588055  | 62680113  | - | 6018  | 712.1547 | 0        | 0.337494 | 0.101283 | 3.33219  | 0.00097  | 0.079663 | 1 |
| ENSG00000196557.6  | TREATTXTPF-00547659 225mg  | Week12 | CACNA1H   | protein_coding       | chr16 | 1203241   | 1271771   | + | 8484  | 95.74033 | 0.00221  | 0.452701 | 0.13586  | 3.33212  | 0.00097  | 0.079663 | 1 |
| ENSG00000124507.6  | TREATTXTPF-00547659 75mg   | Week12 | PACSLIN1  | protein_coding       | chr6  | 34433916  | 34503006  | + | 4712  | 184.8994 | 0        | 0.44217  | 0.132712 | 3.331807 | 0.000971 | 0.079663 | 1 |
| ENSG00000241129.2  | TREATTXTPF-00547659 225mg  | Week12 | RPL22P19  | pseudogene           | chr12 | 125420001 | 125420441 | - | 441   | 0.875138 | 0.78453  | 0.314549 | 0.094409 | 3.331749 | 0.000971 | 0.079663 | 1 |
| ENSG00000154930.10 | TREATTXTPF-00547659 225mg  | Week12 | ACCS1     | protein_coding       | chr20 | 24986868  | 25039616  | - | 10096 | 3269.541 | 0        | 0.259481 | 0.077882 | 3.331725 | 0.000971 | 0.079663 | 1 |
| ENSG00000124496.8  | TREATTXTPF-00547659 225mg  | Week12 | TRERF1    | protein_coding       | chr6  | 42192669  | 42419789  | - | 7732  | 2788.895 | 0        | 0.298059 | 0.089467 | 3.331488 | 0.000972 | 0.079663 | 1 |
| ENSG00000149679.7  | TREATTXTPF-00547659 225mg  | Week12 | CABLES2   | protein_coding       | chr20 | 60963688  | 60982341  | - | 3785  | 567.4685 | 0        | 0.189875 | 0.056995 | 3.331411 | 0.000972 | 0.079663 | 1 |
| ENSG00000189283.5  | TREATTXTPF-00547659 225mg  | Week12 | FHIT      | protein_coding       | chr3  | 59735036  | 61237133  | - | 5439  | 683.1978 | 0        | 0.422245 | 0.126751 | 3.33129  | 0.000973 | 0.079663 | 1 |
| ENSG00000105492.11 | TREATTXTPF-00547659 225mg  | Week12 | SIGLEC6   | protein_coding       | chr19 | 52022779  | 52035110  | - | 2573  | 57.49834 | 0.01989  | 0.585708 | 0.175841 | 3.330895 | 0.000974 | 0.079663 | 1 |
| ENSG00000100351.12 | TREATTXTPF-00547659 75mg   | Week12 | GRAP2     | protein_coding       | chr22 | 40297086  | 40369725  | + | 6190  | 4349.796 | 0        | 0.215673 | 0.064751 | 3.330781 | 0.000974 | 0.079663 | 1 |
| ENSG00000138303.13 | TREATTXTPF-00547659 225mg  | Week12 | ASCC1     | protein_coding       | chr10 | 73856278  | 73976892  | - | 5098  | 661.2862 | 0        | 0.179694 | 0.05395  | 3.330743 | 0.000974 | 0.079663 | 1 |
| ENSG00000250918.2  | TREATTXTPF-00547659 75mg   | Week12 | RP11-497f | pseudogene           | chr5  | 69825198  | 69826377  | + | 1180  | 82.04088 | 0.003315 | -0.46753 | 0.140374 | -3.33059 | 0.000975 | 0.079663 | 1 |
| ENSG00000117242.7  | TREATTXTPF-00547659 225mg  | Week12 | PINK1-AS  | antisense            | chr1  | 20969150  | 20978686  | - | 4443  | 227.3039 | 0.00221  | 0.30922  | 0.092843 | 3.330572 | 0.000975 | 0.079663 | 1 |
| ENSG00000174197.12 | TREATTXTPF-00547659 225mg  | Week12 | MGA       | protein_coding       | chr15 | 41913422  | 42062141  | + | 14513 | 1517.463 | 0        | 0.340389 | 0.102204 | 3.330484 | 0.000975 | 0.079663 | 1 |
| ENSG00000143772.5  | TREATTXTPF-00547659 75mg   | Week12 | ITPKB     | protein_coding       | chr1  | 226819391 | 226927024 | - | 7036  | 7510.972 | 0        | 0.200005 | 0.060088 | 3.32853  | 0.000982 | 0.080057 | 1 |
| ENSG00000073536.13 | TREATTXTPF-00547659 225mg  | Week12 | NLE1      | protein_coding       | chr17 | 33455772  | 33469334  | - | 5463  | 534.0541 | 0        | 0.311473 | 0.093577 | 3.32852  | 0.000982 | 0.080057 | 1 |
| ENSG00000125686.7  | TREATTXTPF-00547659 225mg  | Week12 | MED1      | protein_coding       | chr17 | 37560538  | 37607539  | - | 7330  | 1610.229 | 0        | 0.268022 | 0.080528 | 3.328312 | 0.000983 | 0.080057 | 1 |
| ENSG00000235374.1  | TREATTXTPF-00547659 225mg  | Week12 | SSR4P1    | pseudogene           | chr21 | 46491648  | 46494080  | - | 967   | 17.47735 | 0.029834 | 0.469032 | 0.140951 | 3.327631 | 0.000985 | 0.080177 | 1 |

|                    |                           |        |           |                |       |           |           |   |       |          |          |          |          |          |          |          |   |
|--------------------|---------------------------|--------|-----------|----------------|-------|-----------|-----------|---|-------|----------|----------|----------|----------|----------|----------|----------|---|
| ENSG00000182489.7  | TREATTXTPF-00547659 225mg | Week12 | XKRX      | protein_coding | chrX  | 100168431 | 100184422 | - | 3375  | 40.5558  | 0.018785 | 0.581839 | 0.174879 | 3.327103 | 0.000987 | 0.080204 | 1 |
| ENSG00000132383.7  | TREATTXTPF-00547659 75mg  | Week12 | RPA1      | protein_coding | chr17 | 1732996   | 1803376   | + | 5492  | 3899.725 | 0        | 0.227092 | 0.068257 | 3.327037 | 0.000987 | 0.080204 | 1 |
| ENSG00000069966.14 | TREATTXTPF-00547659 75mg  | Week12 | GNB5      | protein_coding | chr15 | 52413117  | 52483566  | - | 7487  | 654.2873 | 0        | 0.264559 | 0.079536 | 3.326285 | 0.00099  | 0.080219 | 1 |
| ENSG00000211728.2  | TREATTXTPF-00547659 225mg | Week12 | TRBV5-6   | TR_V_gene      | chr7  | 142131412 | 142131918 | - | 384   | 129.4652 | 0.00442  | 0.42624  | 0.128143 | 3.326274 | 0.00099  | 0.080219 | 1 |
| ENSG00000169375.11 | TREATTXTPF-00547659 225mg | Week12 | SIN3A     | protein_coding | chr15 | 75661720  | 75748183  | - | 12453 | 4145.82  | 0        | 0.250021 | 0.075166 | 3.326244 | 0.00099  | 0.080219 | 1 |
| ENSG00000162769.8  | TREATTXTPF-00547659 225mg | Week12 | FLVCR1    | protein_coding | chr1  | 213031597 | 213072705 | + | 6442  | 444.221  | 0        | 0.390464 | 0.117409 | 3.325666 | 0.000992 | 0.080264 | 1 |
| ENSG00000188130.9  | TREATTXTPF-00547659 75mg  | Week12 | MAPK12    | protein_coding | chr22 | 50683879  | 50700254  | - | 9421  | 18.31934 | 0.01989  | 0.487631 | 0.14663  | 3.325586 | 0.000992 | 0.080264 | 1 |
| ENSG00000198182.8  | TREATTXTPF-00547659 225mg | Week12 | ZNF607    | protein_coding | chr19 | 38187264  | 38210691  | - | 4740  | 154.0564 | 0.00221  | 0.416437 | 0.125245 | 3.324989 | 0.000994 | 0.080305 | 1 |
| ENSG00000043143.16 | TREATTXTPF-00547659 75mg  | Week12 | PHF15     | protein_coding | chr5  | 133860003 | 133918918 | + | 9873  | 4999.319 | 0        | 0.254404 | 0.076516 | 3.324864 | 0.000994 | 0.080305 | 1 |
| ENSG00000206113.3  | TREATTXTPF-00547659 75mg  | Week12 | RP11-503N | lincRNA        | chr4  | 2420701   | 2452087   | + | 3832  | 9.040884 | 0.078453 | -0.47423 | 0.142639 | -3.3247  | 0.000995 | 0.080305 | 1 |
| ENSG00000145214.9  | TREATTXTPF-00547659 75mg  | Week12 | DGKQ      | protein_coding | chr4  | 952675    | 980683    | - | 4970  | 1698.432 | 0        | 0.244485 | 0.073552 | 3.323952 | 0.000998 | 0.080334 | 1 |
| ENSG00000244701.1  | TREATTXTPF-00547659 225mg | Week12 | RP5-894A  | antisense      | chr7  | 141352181 | 141356610 | - | 770   | 164.3348 | 0.003315 | 0.429751 | 0.129293 | 3.323847 | 0.000998 | 0.080334 | 1 |
| ENSG00000169413.2  | TREATTXTPF-00547659 75mg  | Week12 | RNAS66    | protein_coding | chr14 | 21249210  | 21250626  | + | 1061  | 3313.852 | 0        | 0.269423 | 0.081062 | 3.323666 | 0.000999 | 0.080334 | 1 |
| ENSG00000126016.9  | TREATTXTPF-00547659 75mg  | Week12 | AMOT      | protein_coding | chrX  | 112017731 | 112084043 | - | 8502  | 112.7901 | 0.005525 | 0.42771  | 0.128689 | 3.323605 | 0.000999 | 0.080334 | 1 |
| ENSG00000101017.9  | TREATTXTPF-00547659 225mg | Week12 | CD40      | protein_coding | chr20 | 44746911  | 44758502  | + | 2368  | 650.9215 | 0        | 0.354422 | 0.106651 | 3.323192 | 0.001    | 0.080334 | 1 |
| ENSG00000211689.2  | TREATTXTPF-00547659 75mg  | Week12 | TRGC1     | TR_C_gene      | chr7  | 38297480  | 38305279  | - | 2730  | 775.5956 | 0        | 0.398087 | 0.119793 | 3.323123 | 0.001    | 0.080334 | 1 |
| ENSG00000157020.13 | TREATTXTPF-00547659 75mg  | Week12 | SEC13     | protein_coding | chr3  | 10334815  | 10362862  | - | 5446  | 2998.376 | 0        | 0.156148 | 0.047005 | 3.32197  | 0.001004 | 0.080525 | 1 |
| ENSG00000183624.9  | TREATTXTPF-00547659 225mg | Week12 | HMCES     | protein_coding | chr3  | 128997671 | 129025029 | + | 2783  | 1864.365 | 0        | 0.221876 | 0.066793 | 3.321833 | 0.001005 | 0.080525 | 1 |
| ENSG00000166167.13 | TREATTXTPF-00547659 225mg | Week12 | BTRC      | protein_coding | chr10 | 103113820 | 103317078 | + | 6583  | 176.9867 | 0        | 0.267508 | 0.080536 | 3.321574 | 0.001006 | 0.080525 | 1 |
| ENSG00000130254.7  | TREATTXTPF-00547659 75mg  | Week12 | SAFB2     | protein_coding | chr19 | 5587010   | 5624057   | - | 6222  | 3154.259 | 0        | 0.157643 | 0.047462 | 3.321458 | 0.001006 | 0.080525 | 1 |
| ENSG00000169116.7  | TREATTXTPF-00547659 225mg | Week12 | PARM1     | protein_coding | chr4  | 75858305  | 75975325  | + | 5034  | 173.4508 | 0.001105 | 0.490118 | 0.147584 | 3.320947 | 0.001008 | 0.080599 | 1 |
| ENSG00000089737.11 | TREATTXTPF-00547659 225mg | Week12 | DDX24     | protein_coding | chr14 | 94517266  | 94547591  | - | 6007  | 6139     | 0        | 0.261457 | 0.078739 | 3.32054  | 0.001009 | 0.080644 | 1 |
| ENSG00000251230.1  | TREATTXTPF-00547659 225mg | Week12 | RP11-701F | lincRNA        | chr4  | 185765739 | 185776905 | - | 986   | 188.0188 | 0.001105 | -0.45068 | 0.135756 | -3.31979 | 0.001012 | 0.08078  | 1 |
| ENSG00000186854.6  | TREATTXTPF-00547659 225mg | Week12 | TRABD2A   | protein_coding | chr2  | 85048774  | 85134132  | - | 8771  | 2338.882 | 0        | 0.425914 | 0.12833  | 3.318908 | 0.001015 | 0.08078  | 1 |
| ENSG00000125945.10 | TREATTXTPF-00547659 225mg | Week12 | ZNF436    | protein_coding | chr1  | 23685941  | 23695935  | - | 4392  | 419.1448 | 0        | 0.281169 | 0.08473  | 3.318405 | 0.001017 | 0.08078  | 1 |
| ENSG00000152969.12 | TREATTXTPF-00547659 75mg  | Week12 | JAKMIP1   | protein_coding | chr4  | 6027926   | 6202318   | - | 3673  | 396.6751 | 0        | 0.357407 | 0.107711 | 3.318202 | 0.001018 | 0.08078  | 1 |
| ENSG00000006114.11 | TREATTXTPF-00547659 225mg | Week12 | SYNRG     | protein_coding | chr17 | 35874900  | 35969544  | - | 14277 | 4171.509 | 0        | 0.264054 | 0.079596 | 3.317411 | 0.00102  | 0.08078  | 1 |
| ENSG00000174792.6  | TREATTXTPF-00547659 75mg  | Week12 | C4orf26   | protein_coding | chr4  | 76481258  | 76491095  | + | 2054  | 3.720442 | 0.344751 | 0.490395 | 0.147826 | 3.317369 | 0.001021 | 0.08078  | 1 |
| ENSG00000139266.5  | TREATTXTPF-00547659 225mg | Week12 | 09-Mar    | protein_coding | chr12 | 58148881  | 58154190  | + | 4005  | 1011.148 | 0        | 0.32923  | 0.099245 | 3.317341 | 0.001021 | 0.08078  | 1 |
| ENSG00000165388.8  | TREATTXTPF-00547659 75mg  | Week12 | ZNF488    | protein_coding | chr10 | 48355024  | 48373866  | + | 4442  | 1.429834 | 0.683978 | 0.370917 | 0.111828 | 3.31685  | 0.001022 | 0.08078  | 1 |
| ENSG00000115423.14 | TREATTXTPF-00547659 225mg | Week12 | DNAH6     | protein_coding | chr2  | 84743579  | 85046713  | + | 13514 | 43.24862 | 0.029834 | 0.642421 | 0.193687 | 3.316798 | 0.001023 | 0.08078  | 1 |
| ENSG00000112941.8  | TREATTXTPF-00547659 225mg | Week12 | PAPD7     | protein_coding | chr5  | 6714718   | 6757161   | + | 5187  | 1375.457 | 0        | 0.317847 | 0.09583  | 3.316786 | 0.001023 | 0.08078  | 1 |
| ENSG00000068745.10 | TREATTXTPF-00547659 75mg  | Week12 | IP6K2     | protein_coding | chr3  | 48725436  | 48777786  | - | 5624  | 2367.933 | 0        | 0.144128 | 0.043456 | 3.316653 | 0.001023 | 0.08078  | 1 |
| ENSG00000138101.14 | TREATTXTPF-00547659 225mg | Week12 | DTNB      | protein_coding | chr2  | 25600067  | 25896503  | - | 7156  | 403.7315 | 0        | 0.19087  | 0.057557 | 3.316218 | 0.001025 | 0.08078  | 1 |
| ENSG00000065675.10 | TREATTXTPF-00547659 75mg  | Week12 | PRKCQ     | protein_coding | chr10 | 6469105   | 6622263   | - | 3285  | 1841.476 | 0        | 0.314365 | 0.094796 | 3.316214 | 0.001025 | 0.08078  | 1 |
| ENSG00000111674.4  | TREATTXTPF-00547659 225mg | Week12 | ENO2      | protein_coding | chr12 | 7022909   | 7032861   | + | 4281  | 1236.045 | 0        | 0.349838 | 0.105498 | 3.316069 | 0.001025 | 0.08078  | 1 |
| ENSG00000076201.10 | TREATTXTPF-00547659 225mg | Week12 | PTPN23    | protein_coding | chr3  | 47422501  | 47454931  | + | 5981  | 2258.282 | 0        | 0.209866 | 0.063289 | 3.316009 | 0.001025 | 0.08078  | 1 |
| ENSG00000157404.11 | TREATTXTPF-00547659 75mg  | Week12 | KIT       | protein_coding | chr4  | 55524085  | 55606881  | + | 5563  | 109.4464 | 0.00663  | 0.559124 | 0.168617 | 3.31595  | 0.001026 | 0.08078  | 1 |
| ENSG00000205531.8  | TREATTXTPF-00547659 225mg | Week12 | NAP1L4    | protein_coding | chr11 | 2965667   | 3013607   | + | 5194  | 5389.656 | 0        | 0.223108 | 0.067284 | 3.315934 | 0.001026 | 0.08078  | 1 |
| ENSG00000135486.13 | TREATTXTPF-00547659 225mg | Week12 | HNRNP1A   | protein_coding | chr12 | 54673977  | 54680872  | + | 5093  | 23386.27 | 0        | 0.269348 | 0.081238 | 3.315566 | 0.001027 | 0.080793 | 1 |
| ENSG00000163508.8  | TREATTXTPF-00547659 75mg  | Week12 | EOMES     | protein_coding | chr3  | 27757440  | 27764206  | - | 3660  | 1161.507 | 0        | 0.385081 | 0.116149 | 3.315405 | 0.001027 | 0.080793 | 1 |
| ENSG00000101350.6  | TREATTXTPF-00547659 225mg | Week12 | KIF3B     | protein_coding | chr20 | 30865467  | 30922814  | + | 6103  | 1288.082 | 0        | 0.202624 | 0.061129 | 3.314662 | 0.00103  | 0.080934 | 1 |
| ENSG00000067533.5  | TREATTXTPF-00547659 225mg | Week12 | RRP15     | protein_coding | chr1  | 218458629 | 218511325 | + | 7883  | 342.5967 | 0        | 0.365098 | 0.110171 | 3.313914 | 0.001033 | 0.081075 | 1 |
| ENSG00000039523.13 | TREATTXTPF-00547659 225mg | Week12 | FAM65A    | protein_coding | chr16 | 67552321  | 67580691  | + | 6730  | 3806.954 | 0        | 0.20091  | 0.060636 | 3.313402 | 0.001035 | 0.081129 | 1 |
| ENSG00000163348.3  | TREATTXTPF-00547659 225mg | Week12 | PYGO2     | protein_coding | chr1  | 154929502 | 154936329 | - | 3630  | 2917.349 | 0        | 0.224784 | 0.067844 | 3.313244 | 0.001035 | 0.081129 | 1 |
| ENSG00000172543.3  | TREATTXTPF-00547659 75mg  | Week12 | CTSW      | protein_coding | chr11 | 65647280  | 65651212  | + | 1719  | 5908.461 | 0        | 0.351647 | 0.106151 | 3.312712 | 0.001037 | 0.081179 | 1 |
| ENSG00000033050.3  | TREATTXTPF-00547659 225mg | Week12 | ABCF2     | protein_coding | chr7  | 150904923 | 150924316 | - | 4448  | 1962.734 | 0        | 0.2249   | 0.067899 | 3.312285 | 0.001039 | 0.081179 | 1 |
| ENSG00000183763.4  | TREATTXTPF-00547659 225mg | Week12 | TRAI2     | protein_coding | chr3  | 49866034  | 49894007  | - | 3261  | 55.10608 | 0.00442  | 0.409751 | 0.123722 | 3.31186  | 0.00104  | 0.081179 | 1 |
| ENSG00000108587.10 | TREATTXTPF-00547659 225mg | Week12 | GOSR1     | protein_coding | chr17 | 28804380  | 28854610  | + | 9855  | 1632.688 | 0        | 0.222813 | 0.067286 | 3.311452 | 0.001042 | 0.081179 | 1 |
| ENSG00000211810.3  | TREATTXTPF-00547659 75mg  | Week12 | TRAV29D   | TR_V_gene      | chr14 | 22631134  | 22631766  | + | 469   | 176.6166 | 0.001105 | 0.443852 | 0.134036 | 3.311439 | 0.001042 | 0.081179 | 1 |
| ENSG00000185298.8  | TREATTXTPF-00547659 225mg | Week12 | CCDC137   | protein_coding | chr17 | 79633394  | 79640934  | + | 2762  | 902.5978 | 0        | 0.19802  | 0.059799 | 3.311435 | 0.001042 | 0.081179 | 1 |
| ENSG00000148300.7  | TREATTXTPF-00547659 225mg | Week12 | REXO4     | protein_coding | chr9  | 136271186 | 136283164 | - | 2599  | 1141.53  | 0        | 0.255143 | 0.077054 | 3.311225 | 0.001042 | 0.081179 | 1 |
| ENSG00000142751.10 | TREATTXTPF-00547659 225mg | Week12 | GPN2      | protein_coding | chr1  | 27202624  | 27216788  | - | 4979  | 1521.951 | 0        | 0.21825  | 0.065913 | 3.311153 | 0.001043 | 0.081179 | 1 |

|                    |                           |        |           |                      |       |           |             |       |          |          |          |          |          |          |          |   |
|--------------------|---------------------------|--------|-----------|----------------------|-------|-----------|-------------|-------|----------|----------|----------|----------|----------|----------|----------|---|
| ENSG00000167972.9  | TREATTXTPF-00547659 225mg | Week12 | ABCA3     | protein_coding       | chr16 | 2325882   | 2390747 -   | 7804  | 286.895  | 0        | 0.306298 | 0.092542 | 3.309842 | 0.001047 | 0.081479 | 1 |
| ENSG00000175868.9  | TREATTXTPF-00547659 225mg | Week12 | CALCB     | protein_coding       | chr11 | 14926543  | 15103888 +  | 3937  | 2.20221  | 0.514917 | 0.432623 | 0.130745 | 3.308915 | 0.001051 | 0.081537 | 1 |
| ENSG00000126882.8  | TREATTXTPF-00547659 225mg | Week12 | FAM78A    | protein_coding       | chr9  | 134133463 | 134151934 - | 5499  | 6972.912 | 0        | 0.220981 | 0.066789 | 3.308641 | 0.001052 | 0.081537 | 1 |
| ENSG00000025293.11 | TREATTXTPF-00547659 225mg | Week12 | PHF20     | protein_coding       | chr20 | 34359896  | 34538303 +  | 7812  | 2598.848 | 0        | 0.226131 | 0.068355 | 3.308166 | 0.001053 | 0.081537 | 1 |
| ENSG00000237037.5  | TREATTXTPF-00547659 225mg | Week12 | NDUFA6-A  | processed_transcript | chr22 | 42486935  | 42535286 +  | 6653  | 148.6099 | 0.001105 | 0.352808 | 0.106649 | 3.308118 | 0.001054 | 0.081537 | 1 |
| ENSG00000188878.12 | TREATTXTPF-00547659 225mg | Week12 | FBF1      | protein_coding       | chr17 | 73905655  | 73937221 -  | 6731  | 177.9801 | 0        | 0.313227 | 0.094686 | 3.308056 | 0.001054 | 0.081537 | 1 |
| ENSG00000267221.1  | TREATTXTPF-00547659 225mg | Week12 | CTD-2132f | sense_intronic       | chr17 | 40192731  | 40195135 -  | 761   | 8.955801 | 0.117127 | 0.530608 | 0.160412 | 3.307776 | 0.001055 | 0.081537 | 1 |
| ENSG00000073605.14 | TREATTXTPF-00547659 225mg | Week12 | GSDMB     | protein_coding       | chr17 | 38060848  | 38076107 -  | 5917  | 1492.697 | 0        | 0.352568 | 0.106594 | 3.307573 | 0.001056 | 0.081537 | 1 |
| ENSG00000110169.6  | TREATTXTPF-00547659 225mg | Week12 | HPX       | protein_coding       | chr11 | 6452279   | 6463847 -   | 3631  | 16.02431 | 0.040884 | 0.525009 | 0.158737 | 3.307416 | 0.001056 | 0.081537 | 1 |
| ENSG00000160214.8  | TREATTXTPF-00547659 225mg | Week12 | RRP1      | protein_coding       | chr21 | 45209394  | 45225174 +  | 4251  | 602.2575 | 0        | 0.266757 | 0.080657 | 3.307283 | 0.001057 | 0.081537 | 1 |
| ENSG00000169991.6  | TREATTXTPF-00547659 225mg | Week12 | IFFO2     | protein_coding       | chr1  | 19230775  | 19283180 -  | 6188  | 1382.741 | 0        | 0.331281 | 0.100167 | 3.307267 | 0.001057 | 0.081537 | 1 |
| ENSG00000090615.8  | TREATTXTPF-00547659 225mg | Week12 | GOLGA3    | protein_coding       | chr12 | 133345495 | 133405444 - | 10550 | 2611.576 | 0        | 0.227559 | 0.068824 | 3.306382 | 0.00106  | 0.081549 | 1 |
| ENSG00000235304.1  | TREATTXTPF-00547659 225mg | Week12 | RP11-265f | lincRNA              | chrX  | 39164210  | 39186616 -  | 1773  | 11.56133 | 0.132597 | 0.614848 | 0.185969 | 3.306176 | 0.001061 | 0.081549 | 1 |
| ENSG00000003249.9  | TREATTXTPF-00547659 225mg | Week12 | DBNDD1    | protein_coding       | chr16 | 90071273  | 90086536 -  | 3522  | 207.4994 | 0.001105 | 0.445503 | 0.134751 | 3.306131 | 0.001061 | 0.081549 | 1 |
| ENSG00000154134.10 | TREATTXTPF-00547659 225mg | Week12 | ROBO3     | protein_coding       | chr11 | 124735282 | 124751366 + | 7026  | 182.1834 | 0.00221  | 0.463562 | 0.140215 | 3.306079 | 0.001061 | 0.081549 | 1 |
| ENSG00000176953.6  | TREATTXTPF-00547659 225mg | Week12 | NFATC2IP  | protein_coding       | chr16 | 28962128  | 28978418 +  | 5738  | 2758.471 | 0        | 0.285303 | 0.086297 | 3.306042 | 0.001061 | 0.081549 | 1 |
| ENSG00000205476.4  | TREATTXTPF-00547659 225mg | Week12 | CCDC85C   | protein_coding       | chr14 | 99977603  | 100070363 - | 6363  | 258.5326 | 0        | 0.390175 | 0.118051 | 3.30513  | 0.001064 | 0.08158  | 1 |
| ENSG00000184787.14 | TREATTXTPF-00547659 225mg | Week12 | UBE2G2    | protein_coding       | chr21 | 46188955  | 46221934 -  | 6928  | 3554.046 | 0        | 0.279532 | 0.084576 | 3.305097 | 0.001065 | 0.08158  | 1 |
| ENSG00000187239.12 | TREATTXTPF-00547659 225mg | Week12 | FBNP1     | protein_coding       | chr9  | 132649466 | 132805473 - | 6686  | 12321.01 | 0        | 0.190466 | 0.057628 | 3.305086 | 0.001065 | 0.08158  | 1 |
| ENSG00000129245.7  | TREATTXTPF-00547659 75mg  | Week12 | FXR2      | protein_coding       | chr17 | 7494548   | 7518189 -   | 4331  | 1738.002 | 0        | 0.132565 | 0.040116 | 3.304572 | 0.001067 | 0.08158  | 1 |
| ENSG00000124203.5  | TREATTXTPF-00547659 225mg | Week12 | ZNF831    | protein_coding       | chr20 | 57766075  | 57834168 +  | 9404  | 1261.277 | 0        | 0.415291 | 0.125675 | 3.304477 | 0.001067 | 0.08158  | 1 |
| ENSG00000113812.9  | TREATTXTPF-00547659 225mg | Week12 | ACTR8     | protein_coding       | chr3  | 53901093  | 53916229 +  | 4066  | 682.5547 | 0        | 0.217691 | 0.065886 | 3.304036 | 0.001069 | 0.08158  | 1 |
| ENSG00000132275.6  | TREATTXTPF-00547659 225mg | Week12 | RRP8      | protein_coding       | chr11 | 6616305   | 6624850 -   | 6922  | 869.3381 | 0        | 0.216115 | 0.065414 | 3.303814 | 0.001069 | 0.08158  | 1 |
| ENSG00000176171.7  | TREATTXTPF-00547659 225mg | Week12 | BNIP3     | protein_coding       | chr10 | 133781578 | 133795435 - | 2111  | 289.1149 | 0        | 0.355701 | 0.107665 | 3.303771 | 0.001069 | 0.08158  | 1 |
| ENSG00000204933.2  | TREATTXTPF-00547659 75mg  | Week12 | CD177P1   | pseudogene           | chr19 | 43876894  | 43883276 -  | 1061  | 87.37017 | 0.269613 | -1.08575 | 0.328666 | -3.30351 | 0.00107  | 0.08158  | 1 |
| ENSG00000039123.11 | TREATTXTPF-00547659 225mg | Week12 | SKIV2L2   | protein_coding       | chr5  | 54603588  | 54721409 +  | 6578  | 1788.252 | 0        | 0.306215 | 0.092697 | 3.303399 | 0.001071 | 0.08158  | 1 |
| ENSG00000115687.9  | TREATTXTPF-00547659 225mg | Week12 | PASK      | protein_coding       | chr2  | 242045514 | 242089679 - | 10686 | 1363.88  | 0        | 0.3929   | 0.118943 | 3.303262 | 0.001071 | 0.08158  | 1 |
| ENSG00000171219.8  | TREATTXTPF-00547659 225mg | Week12 | CDC42BPC  | protein_coding       | chr11 | 64590859  | 64612041 -  | 6112  | 182.3083 | 0.001105 | 0.36259  | 0.109783 | 3.302798 | 0.001073 | 0.08158  | 1 |
| ENSG00000224078.8  | TREATTXTPF-00547659 225mg | Week12 | SNHG14    | processed_transcript | chr15 | 25223730  | 25664609 +  | 32477 | 516.011  | 0        | 0.407696 | 0.12344  | 3.302778 | 0.001073 | 0.08158  | 1 |
| ENSG00000125386.10 | TREATTXTPF-00547659 75mg  | Week12 | FAM193A   | protein_coding       | chr4  | 2626988   | 2734292 +   | 6174  | 2054.021 | 0        | 0.162721 | 0.04927  | 3.302653 | 0.001074 | 0.08158  | 1 |
| ENSG00000099991.12 | TREATTXTPF-00547659 225mg | Week12 | CABIN1    | protein_coding       | chr22 | 24407642  | 24574596 +  | 9388  | 7596.905 | 0        | 0.23439  | 0.070982 | 3.302121 | 0.001076 | 0.081618 | 1 |
| ENSG00000138614.10 | TREATTXTPF-00547659 225mg | Week12 | VWA9      | protein_coding       | chr15 | 65871091  | 65903627 -  | 4210  | 1097.224 | 0        | 0.271603 | 0.082253 | 3.302054 | 0.001076 | 0.081618 | 1 |
| ENSG00000236662.1  | TREATTXTPF-00547659 225mg | Week12 | RP11-108l | antisense            | chr10 | 102740264 | 102745371 - | 342   | 10.85856 | 0.088398 | 0.528543 | 0.160083 | 3.301688 | 0.001077 | 0.081655 | 1 |
| ENSG00000089692.4  | TREATTXTPF-00547659 75mg  | Week12 | LAG3      | protein_coding       | chr12 | 6881678   | 6887621 +   | 3056  | 555.8287 | 0        | 0.41644  | 0.126176 | 3.300468 | 0.001082 | 0.081887 | 1 |
| ENSG00000142528.11 | TREATTXTPF-00547659 225mg | Week12 | ZNF473    | protein_coding       | chr19 | 50528971  | 50556671 +  | 6898  | 322.0276 | 0.001105 | 0.290909 | 0.088144 | 3.300401 | 0.001082 | 0.081887 | 1 |
| ENSG00000151779.8  | TREATTXTPF-00547659 225mg | Week12 | NBAS      | protein_coding       | chr2  | 15307032  | 15701454 -  | 8949  | 1287.59  | 0        | 0.256741 | 0.07781  | 3.299583 | 0.001085 | 0.082051 | 1 |
| ENSG00000172273.8  | TREATTXTPF-00547659 225mg | Week12 | HINFP     | protein_coding       | chr11 | 118992297 | 119006752 + | 9834  | 1048.389 | 0        | 0.209391 | 0.063473 | 3.298894 | 0.001088 | 0.08218  | 1 |
| ENSG00000176083.13 | TREATTXTPF-00547659 75mg  | Week12 | ZNF683    | protein_coding       | chr1  | 26688125  | 26701013 -  | 2379  | 725.3635 | 0        | 0.545086 | 0.165275 | 3.298051 | 0.001091 | 0.082353 | 1 |
| ENSG00000243273.1  | TREATTXTPF-00547659 75mg  | Week12 | RP11-166h | antisense            | chr3  | 150608423 | 150756605 + | 565   | 129.9624 | 0.009945 | -0.73103 | 0.22173  | -3.29693 | 0.001095 | 0.082605 | 1 |
| ENSG00000213742.2  | TREATTXTPF-00547659 225mg | Week12 | RP4-694B  | antisense            | chr20 | 25604681  | 25658710 +  | 5308  | 33.31602 | 0.012155 | 0.509465 | 0.154563 | 3.296167 | 0.001098 | 0.082756 | 1 |
| ENSG00000177374.8  | TREATTXTPF-00547659 75mg  | Week12 | HIC1      | protein_coding       | chr17 | 1957448   | 1962981 +   | 4554  | 134.3912 | 0.001105 | 0.428599 | 0.130071 | 3.295121 | 0.001102 | 0.082979 | 1 |
| ENSG00000075275.12 | TREATTXTPF-00547659 225mg | Week12 | CELSR1    | protein_coding       | chr22 | 46756731  | 46933067 -  | 12817 | 185.2309 | 0.00221  | 0.500479 | 0.151908 | 3.294621 | 0.001104 | 0.082979 | 1 |
| ENSG00000120253.9  | TREATTXTPF-00547659 225mg | Week12 | NUP43     | protein_coding       | chr6  | 150045451 | 150070801 - | 4538  | 1145.828 | 0        | 0.31136  | 0.094512 | 3.294408 | 0.001104 | 0.082979 | 1 |
| ENSG00000134759.9  | TREATTXTPF-00547659 225mg | Week12 | ELP2      | protein_coding       | chr18 | 33709407  | 33757909 +  | 8458  | 1870.555 | 0        | 0.29434  | 0.089353 | 3.294126 | 0.001106 | 0.082979 | 1 |
| ENSG00000173511.5  | TREATTXTPF-00547659 225mg | Week12 | VEGFB     | protein_coding       | chr11 | 64002010  | 64006259 +  | 1539  | 1038.449 | 0        | 0.317854 | 0.0965   | 3.293813 | 0.001107 | 0.082979 | 1 |
| ENSG00000130713.11 | TREATTXTPF-00547659 225mg | Week12 | EXOSC2    | protein_coding       | chr9  | 133569108 | 133580248 + | 4207  | 761.1757 | 0        | 0.310921 | 0.094396 | 3.293786 | 0.001107 | 0.082979 | 1 |
| ENSG00000166483.6  | TREATTXTPF-00547659 225mg | Week12 | WEE1      | protein_coding       | chr11 | 9595228   | 9615004 +   | 9239  | 318.0088 | 0.001105 | 0.418236 | 0.126978 | 3.293766 | 0.001107 | 0.082979 | 1 |
| ENSG00000183621.11 | TREATTXTPF-00547659 75mg  | Week12 | ZNF438    | protein_coding       | chr10 | 31109136  | 31320866 -  | 4294  | 2008.513 | 0        | -0.27128 | 0.082396 | -3.29239 | 0.001112 | 0.083307 | 1 |
| ENSG00000181847.7  | TREATTXTPF-00547659 75mg  | Week12 | TIGIT     | protein_coding       | chr3  | 113995760 | 114029135 + | 6091  | 1249.236 | 0        | 0.370575 | 0.112593 | 3.291285 | 0.001116 | 0.083436 | 1 |
| ENSG00000250918.2  | TREATTXTPF-00547659 225mg | Week12 | RP11-497f | pseudogene           | chr5  | 69825198  | 69826377 +  | 1180  | 82.04088 | 0.003315 | -0.47679 | 0.144864 | -3.29127 | 0.001116 | 0.083436 | 1 |
| ENSG00000240535.4  | TREATTXTPF-00547659 75mg  | Week12 | CTD-2313f | processed_transcript | chr5  | 54317127  | 54338672 -  | 3486  | 16.19448 | 0.059669 | 0.548122 | 0.16655  | 3.291048 | 0.001117 | 0.083436 | 1 |
| ENSG00000163913.7  | TREATTXTPF-00547659 225mg | Week12 | IFT122    | protein_coding       | chr3  | 129158968 | 129239198 + | 9395  | 574.6917 | 0        | 0.17023  | 0.051727 | 3.290893 | 0.001118 | 0.083436 | 1 |
| ENSG00000137073.16 | TREATTXTPF-00547659 75mg  | Week12 | UBAP2     | protein_coding       | chr9  | 33921691  | 34048947 -  | 10610 | 839.2508 | 0        | 0.256408 | 0.077939 | 3.289868 | 0.001122 | 0.083436 | 1 |



|                    |                           |        |           |                |       |           |             |       |          |          |          |          |          |          |          |   |
|--------------------|---------------------------|--------|-----------|----------------|-------|-----------|-------------|-------|----------|----------|----------|----------|----------|----------|----------|---|
| ENSG00000144134.14 | TREATTXTPF-00547659 225mg | Week12 | RABL2A    | protein_coding | chr2  | 114384806 | 114400973 + | 6008  | 382.5293 | 0        | 0.306884 | 0.093289 | 3.289619 | 0.001123 | 0.083436 | 1 |
| ENSG00000174137.8  | TREATTXTPF-00547659 225mg | Week12 | FAM53A    | protein_coding | chr4  | 1619642   | 1686029 -   | 4239  | 44.99669 | 0.003315 | 0.371204 | 0.112857 | 3.289166 | 0.001124 | 0.083436 | 1 |
| ENSG00000168970.16 | TREATTXTPF-00547659 225mg | Week12 | JMJD7-PL1 | protein_coding | chr15 | 42120293  | 42140353 +  | 7862  | 322.0751 | 0.00442  | 0.519137 | 0.157834 | 3.289125 | 0.001125 | 0.083436 | 1 |
| ENSG00000106477.14 | TREATTXTPF-00547659 225mg | Week12 | CEP41     | protein_coding | chr7  | 130033612 | 130082274 - | 12566 | 295.6464 | 0        | 0.295745 | 0.08992  | 3.288978 | 0.001125 | 0.083436 | 1 |
| ENSG00000227678.3  | TREATTXTPF-00547659 75mg  | Week12 | RP11-730i | antisense      | chr6  | 130454555 | 130465515 - | 1743  | 52.83646 | 0.00884  | 0.514558 | 0.156468 | 3.288591 | 0.001127 | 0.083436 | 1 |
| ENSG00000101842.9  | TREATTXTPF-00547659 225mg | Week12 | VSIG1     | protein_coding | chrX  | 107288200 | 107322414 + | 3769  | 375.1735 | 0        | 0.445901 | 0.135603 | 3.288294 | 0.001128 | 0.083436 | 1 |
| ENSG00000117481.6  | TREATTXTPF-00547659 225mg | Week12 | NSUN4     | protein_coding | chr1  | 46805849  | 46830824 +  | 8468  | 661.2188 | 0        | 0.244419 | 0.074331 | 3.288247 | 0.001128 | 0.083436 | 1 |
| ENSG00000163161.8  | TREATTXTPF-00547659 225mg | Week12 | ERCC3     | protein_coding | chr2  | 128014866 | 128051752 - | 7401  | 1858.598 | 0        | 0.210996 | 0.064167 | 3.288209 | 0.001128 | 0.083436 | 1 |
| ENSG00000172943.14 | TREATTXTPF-00547659 225mg | Week12 | PHF8      | protein_coding | chrX  | 53963109  | 54075391 -  | 9015  | 2810.709 | 0        | 0.227459 | 0.06918  | 3.287954 | 0.001129 | 0.083436 | 1 |
| ENSG00000124608.4  | TREATTXTPF-00547659 225mg | Week12 | AARS2     | protein_coding | chr6  | 44267391  | 44281063 -  | 4298  | 475.2917 | 0        | 0.295851 | 0.089982 | 3.287876 | 0.001129 | 0.083436 | 1 |
| ENSG00000078269.9  | TREATTXTPF-00547659 75mg  | Week12 | SYNJ2     | protein_coding | chr6  | 158402888 | 158520208 + | 9985  | 640.1127 | 0        | 0.30532  | 0.092864 | 3.287819 | 0.00113  | 0.083436 | 1 |
| ENSG00000186532.7  | TREATTXTPF-00547659 225mg | Week12 | SMYD4     | protein_coding | chr17 | 1682779   | 1733928 -   | 6777  | 631.9293 | 0        | 0.34231  | 0.104124 | 3.28751  | 0.001131 | 0.083436 | 1 |
| ENSG00000243055.1  | TREATTXTPF-00547659 7.5mg | Week12 | GK-AS1    | antisense      | chrX  | 30718115  | 30742291 -  | 651   | 1.909392 | 0.8      | 0.344449 | 0.104779 | 3.287379 | 0.001131 | 0.083436 | 1 |
| ENSG00000145375.7  | TREATTXTPF-00547659 225mg | Week12 | SPATA5    | protein_coding | chr4  | 123844229 | 124240605 + | 8247  | 185.2685 | 0.003315 | 0.422639 | 0.128583 | 3.286912 | 0.001133 | 0.083436 | 1 |
| ENSG00000103222.14 | TREATTXTPF-00547659 75mg  | Week12 | ABCC1     | protein_coding | chr16 | 16043434  | 16236931 +  | 7575  | 2502.546 | 0        | 0.223037 | 0.067857 | 3.286852 | 0.001133 | 0.083436 | 1 |
| ENSG00000119401.10 | TREATTXTPF-00547659 75mg  | Week12 | TRIM32    | protein_coding | chr9  | 119449581 | 119463579 + | 3780  | 399.2265 | 0        | 0.326358 | 0.099296 | 3.286713 | 0.001134 | 0.083436 | 1 |
| ENSG00000139197.6  | TREATTXTPF-00547659 225mg | Week12 | PEX5      | protein_coding | chr12 | 7341281   | 7371170 +   | 5488  | 1062.37  | 0        | 0.214016 | 0.065116 | 3.286708 | 0.001134 | 0.083436 | 1 |
| ENSG00000111788.9  | TREATTXTPF-00547659 225mg | Week12 | RP11-22B1 | pseudogene     | chr12 | 9429831   | 9466684 +   | 4137  | 136.1414 | 0.003315 | 0.507156 | 0.154306 | 3.286683 | 0.001134 | 0.083436 | 1 |
| ENSG00000188511.8  | TREATTXTPF-00547659 225mg | Week12 | C22orf34  | protein_coding | chr22 | 49808176  | 50051190 -  | 6755  | 280.9193 | 0.001105 | 0.242264 | 0.073718 | 3.28637  | 0.001135 | 0.083461 | 1 |
| ENSG00000064651.9  | TREATTXTPF-00547659 225mg | Week12 | SLC12A2   | protein_coding | chr5  | 127419458 | 127525380 + | 10664 | 179.0663 | 0.003315 | 0.46737  | 0.142227 | 3.286086 | 0.001136 | 0.083478 | 1 |
| ENSG00000100139.9  | TREATTXTPF-00547659 75mg  | Week12 | MICALL1   | protein_coding | chr22 | 38301664  | 38338829 +  | 5968  | 1229.368 | 0        | 0.205974 | 0.062699 | 3.285144 | 0.00114  | 0.083639 | 1 |
| ENSG00000241945.3  | TREATTXTPF-00547659 225mg | Week12 | PWP2      | protein_coding | chr21 | 45527171  | 45551063 +  | 6922  | 1220.509 | 0        | 0.221109 | 0.067307 | 3.285069 | 0.00114  | 0.083639 | 1 |
| ENSG00000108264.12 | TREATTXTPF-00547659 225mg | Week12 | TADA2A    | protein_coding | chr17 | 35766965  | 35839835 +  | 5654  | 562.1757 | 0        | 0.292336 | 0.089009 | 3.284341 | 0.001143 | 0.083746 | 1 |
| ENSG00000133243.4  | TREATTXTPF-00547659 225mg | Week12 | BTBD2     | protein_coding | chr19 | 1985447   | 2034880 -   | 5505  | 3543.627 | 0        | 0.228022 | 0.069431 | 3.284145 | 0.001144 | 0.083746 | 1 |
| ENSG00000186026.6  | TREATTXTPF-00547659 225mg | Week12 | ZNF284    | protein_coding | chr19 | 44576297  | 44593766 +  | 4351  | 127.3127 | 0.001105 | 0.337152 | 0.102674 | 3.283715 | 0.001146 | 0.083746 | 1 |
| ENSG00000196810.4  | TREATTXTPF-00547659 225mg | Week12 | CTBP1-AS2 | antisense      | chr4  | 1243088   | 1282079 +   | 7820  | 554.2232 | 0        | 0.313866 | 0.095584 | 3.283656 | 0.001146 | 0.083746 | 1 |
| ENSG00000184675.5  | TREATTXTPF-00547659 225mg | Week12 | AMER1     | protein_coding | chrX  | 63404997  | 63425624 -  | 8443  | 267.558  | 0        | 0.386254 | 0.117632 | 3.283571 | 0.001146 | 0.083746 | 1 |
| ENSG00000243811.3  | TREATTXTPF-00547659 225mg | Week12 | APOBEC3E  | protein_coding | chr22 | 39410368  | 39429281 +  | 2545  | 911.9967 | 0        | 0.306104 | 0.093234 | 3.283187 | 0.001148 | 0.083791 | 1 |
| ENSG00000182199.6  | TREATTXTPF-00547659 225mg | Week12 | SHMT2     | protein_coding | chr12 | 57623110  | 57628718 +  | 4838  | 2508.79  | 0        | 0.248416 | 0.075672 | 3.282807 | 0.001149 | 0.083836 | 1 |
| ENSG00000100888.8  | TREATTXTPF-00547659 225mg | Week12 | CHD8      | protein_coding | chr14 | 21853353  | 21924285 -  | 9781  | 4247.735 | 0        | 0.190485 | 0.058037 | 3.282131 | 0.001152 | 0.083953 | 1 |
| ENSG00000112333.7  | TREATTXTPF-00547659 75mg  | Week12 | NR2E1     | protein_coding | chr6  | 108487262 | 108510013 + | 3733  | 22.03315 | 0.254144 | -0.85828 | 0.261517 | -3.28192 | 0.001153 | 0.083953 | 1 |
| ENSG00000211777.2  | TREATTXTPF-00547659 225mg | Week12 | TRAV3     | TR_V_gene      | chr14 | 22191960  | 22192568 +  | 519   | 169.3691 | 0.00442  | 0.490582 | 0.149489 | 3.281724 | 0.001154 | 0.083953 | 1 |
| ENSG00000149115.9  | TREATTXTPF-00547659 225mg | Week12 | TNKS1BP1  | protein_coding | chr11 | 57067112  | 57092426 -  | 7149  | 268.6696 | 0        | 0.344821 | 0.105081 | 3.28148  | 0.001154 | 0.083959 | 1 |
| ENSG00000092094.6  | TREATTXTPF-00547659 225mg | Week12 | OSGEP     | protein_coding | chr14 | 20914570  | 20923264 -  | 5041  | 1515.597 | 0        | 0.248316 | 0.075679 | 3.281176 | 0.001156 | 0.083982 | 1 |
| ENSG00000165102.10 | TREATTXTPF-00547659 225mg | Week12 | HGSNAT    | protein_coding | chr8  | 42995556  | 43057998 +  | 8985  | 3315.594 | 0        | 0.197392 | 0.060165 | 3.280817 | 0.001157 | 0.083993 | 1 |
| ENSG00000159164.5  | TREATTXTPF-00547659 75mg  | Week12 | SV2A      | protein_coding | chr1  | 149874870 | 149889434 - | 4824  | 96.18785 | 0.001105 | 0.354257 | 0.107984 | 3.280655 | 0.001158 | 0.083993 | 1 |
| ENSG00000127586.12 | TREATTXTPF-00547659 225mg | Week12 | CHTF18    | protein_coding | chr16 | 838046    | 850737 +    | 5916  | 322.4122 | 0        | 0.310468 | 0.094654 | 3.280044 | 0.00116  | 0.083993 | 1 |
| ENSG00000067057.12 | TREATTXTPF-00547659 225mg | Week12 | PFKf      | protein_coding | chr10 | 3108525   | 3179904 +   | 4827  | 1835.576 | 0        | 0.256162 | 0.0781   | 3.279938 | 0.001161 | 0.083993 | 1 |
| ENSG00000196821.5  | TREATTXTPF-00547659 75mg  | Week12 | C6orf106  | protein_coding | chr6  | 34555065  | 34664636 -  | 4551  | 5815.159 | 0        | 0.160377 | 0.048897 | 3.279909 | 0.001161 | 0.083993 | 1 |
| ENSG00000169914.5  | TREATTXTPF-00547659 225mg | Week12 | OTUD3     | protein_coding | chr1  | 20209006  | 20239438 +  | 6767  | 472.5182 | 0        | 0.412259 | 0.125697 | 3.279798 | 0.001161 | 0.083993 | 1 |
| ENSG00000100124.8  | TREATTXTPF-00547659 225mg | Week12 | ANKRD54   | protein_coding | chr22 | 38226862  | 38245334 -  | 4487  | 550.789  | 0        | 0.23242  | 0.070884 | 3.278859 | 0.001165 | 0.084103 | 1 |
| ENSG00000171130.13 | TREATTXTPF-00547659 225mg | Week12 | ATP6VOE2  | protein_coding | chr7  | 149570057 | 149577784 + | 3332  | 1679.429 | 0        | 0.320743 | 0.097825 | 3.278754 | 0.001165 | 0.084103 | 1 |
| ENSG00000177963.8  | TREATTXTPF-00547659 225mg | Week12 | RIC8A     | protein_coding | chr11 | 207511    | 215113 +    | 6685  | 4306.922 | 0        | 0.130032 | 0.039659 | 3.278747 | 0.001165 | 0.084103 | 1 |
| ENSG00000188389.6  | TREATTXTPF-00547659 225mg | Week12 | PDCD1     | protein_coding | chr2  | 242792033 | 242801060 - | 2114  | 330.3768 | 0        | 0.413564 | 0.126153 | 3.278271 | 0.001167 | 0.084128 | 1 |
| ENSG00000131242.11 | TREATTXTPF-00547659 225mg | Week12 | RAB11FIP4 | protein_coding | chr17 | 29718642  | 29865236 +  | 15384 | 5811.207 | 0        | 0.135591 | 0.041361 | 3.278213 | 0.001167 | 0.084128 | 1 |
| ENSG00000198851.5  | TREATTXTPF-00547659 75mg  | Week12 | CD3E      | protein_coding | chr11 | 118175260 | 118186890 + | 2844  | 17226.31 | 0        | 0.322001 | 0.098234 | 3.277886 | 0.001169 | 0.084159 | 1 |
| ENSG00000211789.2  | TREATTXTPF-00547659 225mg | Week12 | TRAV12-2  | TR_V_gene      | chr14 | 22356037  | 22356682 +  | 445   | 297.3823 | 0        | 0.408688 | 0.124696 | 3.277468 | 0.00117  | 0.084215 | 1 |
| ENSG00000085563.10 | TREATTXTPF-00547659 75mg  | Week12 | ABCB1     | protein_coding | chr7  | 87133175  | 87342611 -  | 5552  | 378.8354 | 0.001105 | 0.414381 | 0.126448 | 3.277079 | 0.001172 | 0.084225 | 1 |
| ENSG00000171603.12 | TREATTXTPF-00547659 225mg | Week12 | CLSTN1    | protein_coding | chr1  | 9789084   | 9884584 -   | 5559  | 4409.636 | 0        | 0.292061 | 0.089125 | 3.276989 | 0.001172 | 0.084225 | 1 |
| ENSG00000272983.1  | TREATTXTPF-00547659 225mg | Week12 | RP11-508f | lincRNA        | chr10 | 38426265  | 38433327 +  | 7063  | 3.790055 | 0.331492 | 0.487232 | 0.148711 | 3.276375 | 0.001175 | 0.084286 | 1 |
| ENSG00000126251.5  | TREATTXTPF-00547659 225mg | Week12 | GPR42     | protein_coding | chr19 | 35861831  | 35863855 +  | 1854  | 10.47514 | 0.145856 | -0.61853 | 0.1888   | -3.27612 | 0.001176 | 0.084286 | 1 |
| ENSG00000131242.11 | TREATTXTPF-00547659 75mg  | Week12 | RAB11FIP4 | protein_coding | chr17 | 29718642  | 29865236 +  | 15384 | 5811.207 | 0        | 0.131829 | 0.04024  | 3.276101 | 0.001176 | 0.084286 | 1 |
| ENSG00000100211.6  | TREATTXTPF-00547659 225mg | Week12 | CBY1      | protein_coding | chr22 | 39052641  | 39069859 +  | 2348  | 276.0309 | 0.001105 | 0.265058 | 0.080912 | 3.275894 | 0.001177 | 0.084286 | 1 |

|                    |                           |        |            |                      |       |           |             |       |          |          |          |          |          |          |          |   |
|--------------------|---------------------------|--------|------------|----------------------|-------|-----------|-------------|-------|----------|----------|----------|----------|----------|----------|----------|---|
| ENSG00000168067.7  | TREATTXTPF-00547659 75mg  | Week12 | MAP4K2     | protein_coding       | chr11 | 64556290  | 64570713 -  | 3745  | 3343.688 | 0        | 0.159662 | 0.048745 | 3.275458 | 0.001179 | 0.084348 | 1 |
| ENSG00000181035.9  | TREATTXTPF-00547659 75mg  | Week12 | SLC25A42   | protein_coding       | chr19 | 19174808  | 19223697 +  | 4519  | 1010.675 | 0        | 0.302787 | 0.092453 | 3.27505  | 0.00118  | 0.084391 | 1 |
| ENSG00000137700.12 | TREATTXTPF-00547659 225mg | Week12 | SLC37A4    | protein_coding       | chr11 | 118894824 | 118901616 - | 6186  | 429.1271 | 0.001105 | 0.271907 | 0.083033 | 3.274688 | 0.001182 | 0.084391 | 1 |
| ENSG00000135749.14 | TREATTXTPF-00547659 225mg | Week12 | PCNXL2     | protein_coding       | chr1  | 233119181 | 233431459 - | 13815 | 873.4851 | 0        | 0.338933 | 0.103502 | 3.274644 | 0.001182 | 0.084391 | 1 |
| ENSG00000168411.9  | TREATTXTPF-00547659 225mg | Week12 | RFWD3      | protein_coding       | chr16 | 74655292  | 74700779 -  | 6465  | 1202.466 | 0        | 0.243837 | 0.074472 | 3.274233 | 0.001183 | 0.084446 | 1 |
| ENSG00000174996.7  | TREATTXTPF-00547659 225mg | Week12 | KLC2       | protein_coding       | chr11 | 66024765  | 66035331 +  | 5479  | 543.0199 | 0        | 0.316612 | 0.096718 | 3.273576 | 0.001186 | 0.084559 | 1 |
| ENSG00000178252.13 | TREATTXTPF-00547659 225mg | Week12 | WDR6       | protein_coding       | chr3  | 49044495  | 49053386 +  | 5304  | 4732.515 | 0        | 0.255553 | 0.078069 | 3.273402 | 0.001187 | 0.084559 | 1 |
| ENSG00000260729.1  | TREATTXTPF-00547659 225mg | Week12 | RP11-106f1 | processed_transcript | chr15 | 72577068  | 72668322 -  | 4374  | 8.738122 | 0.102762 | 0.517572 | 0.158139 | 3.272889 | 0.001189 | 0.084644 | 1 |
| ENSG00000177000.6  | TREATTXTPF-00547659 225mg | Week12 | MTHFR      | protein_coding       | chr1  | 11845780  | 11866977 -  | 10214 | 2173.698 | 0        | 0.234917 | 0.071792 | 3.272209 | 0.001192 | 0.084669 | 1 |
| ENSG00000188706.8  | TREATTXTPF-00547659 225mg | Week12 | ZDHHC9     | protein_coding       | chrX  | 128937264 | 128977885 - | 5243  | 173.5757 | 0.00221  | 0.345496 | 0.10559  | 3.272055 | 0.001192 | 0.084669 | 1 |
| ENSG00000102053.11 | TREATTXTPF-00547659 225mg | Week12 | ZC3H12B    | protein_coding       | chrX  | 64708615  | 64727767 +  | 7256  | 43.07514 | 0.01326  | 0.521396 | 0.159353 | 3.271962 | 0.001193 | 0.084669 | 1 |
| ENSG00000260461.1  | TREATTXTPF-00547659 225mg | Week12 | RP11-541f1 | sense_overlapping    | chr10 | 105637132 | 105639519 - | 2388  | 310.4122 | 0.001105 | 0.364661 | 0.111455 | 3.271829 | 0.001193 | 0.084669 | 1 |
| ENSG00000101079.16 | TREATTXTPF-00547659 75mg  | Week12 | NRG3       | protein_coding       | chr20 | 35280169  | 35374481 -  | 3248  | 2383.371 | 0        | 0.161587 | 0.049393 | 3.271482 | 0.001195 | 0.084669 | 1 |
| ENSG00000230091.2  | TREATTXTPF-00547659 225mg | Week12 | TMEM254    | antisense            | chr10 | 81806616  | 81838668 -  | 3138  | 29.23204 | 0.01989  | 0.565398 | 0.172829 | 3.271435 | 0.001195 | 0.084669 | 1 |
| ENSG00000169045.13 | TREATTXTPF-00547659 225mg | Week12 | HNRNPH1    | protein_coding       | chr5  | 179041179 | 179061785 - | 9480  | 10678.53 | 0        | 0.336936 | 0.103004 | 3.271091 | 0.001196 | 0.084669 | 1 |
| ENSG00000119866.16 | TREATTXTPF-00547659 225mg | Week12 | BCL11A     | protein_coding       | chr2  | 60678302  | 60780702 -  | 8278  | 605.1613 | 0        | 0.317127 | 0.096974 | 3.270237 | 0.0012   | 0.084669 | 1 |
| ENSG00000163520.9  | TREATTXTPF-00547659 225mg | Week12 | FBLN2      | protein_coding       | chr3  | 13573824  | 13679922 +  | 4996  | 93.69613 | 0.005525 | 0.503662 | 0.154015 | 3.270221 | 0.0012   | 0.084669 | 1 |
| ENSG00000141564.9  | TREATTXTPF-00547659 225mg | Week12 | RPTOR      | protein_coding       | chr17 | 78518619  | 78940171 +  | 9389  | 1420.146 | 0        | 0.296125 | 0.090554 | 3.27014  | 0.0012   | 0.084669 | 1 |
| ENSG00000119138.3  | TREATTXTPF-00547659 225mg | Week12 | KLF9       | protein_coding       | chr9  | 72999503  | 73029540 -  | 5185  | 870.8641 | 0        | 0.451771 | 0.138158 | 3.269963 | 0.001201 | 0.084669 | 1 |
| ENSG00000163959.5  | TREATTXTPF-00547659 75mg  | Week12 | SLC51A     | protein_coding       | chr3  | 195938358 | 195970049 + | 5293  | 47.49392 | 0.041989 | -0.82377 | 0.251921 | -3.26996 | 0.001201 | 0.084669 | 1 |
| ENSG00000165671.14 | TREATTXTPF-00547659 225mg | Week12 | NSD1       | protein_coding       | chr5  | 176560026 | 176727216 + | 15242 | 4602.159 | 0        | 0.211795 | 0.06477  | 3.269957 | 0.001201 | 0.084669 | 1 |
| ENSG00000183337.12 | TREATTXTPF-00547659 225mg | Week12 | BCOR       | protein_coding       | chrX  | 39909068  | 40036582 -  | 7642  | 1435.589 | 0        | 0.346179 | 0.105886 | 3.269368 | 0.001203 | 0.084747 | 1 |
| ENSG00000167110.12 | TREATTXTPF-00547659 225mg | Week12 | GOLGA2     | protein_coding       | chr9  | 131018108 | 131038274 - | 6961  | 1943.2   | 0        | 0.158928 | 0.048621 | 3.268704 | 0.001206 | 0.084747 | 1 |
| ENSG00000108262.11 | TREATTXTPF-00547659 225mg | Week12 | GIT1       | protein_coding       | chr17 | 27900487  | 27921072 -  | 5635  | 3171.527 | 0        | 0.213888 | 0.065438 | 3.268562 | 0.001207 | 0.084747 | 1 |
| ENSG00000103264.11 | TREATTXTPF-00547659 225mg | Week12 | FBXO31     | protein_coding       | chr16 | 87360593  | 87425748 -  | 6810  | 1143.398 | 0        | 0.273225 | 0.083601 | 3.268189 | 0.001208 | 0.084747 | 1 |
| ENSG00000223704.1  | TREATTXTPF-00547659 225mg | Week12 | RP1-90L6.1 | lincRNA              | chr22 | 27254597  | 27261749 +  | 6043  | 87.48619 | 0.007735 | 0.498366 | 0.15249  | 3.268186 | 0.001208 | 0.084747 | 1 |
| ENSG00000122085.12 | TREATTXTPF-00547659 225mg | Week12 | MTERFD2    | protein_coding       | chr2  | 242011584 | 242041747 - | 9938  | 1985.191 | 0        | 0.304765 | 0.093259 | 3.267931 | 0.001209 | 0.084747 | 1 |
| ENSG00000102910.9  | TREATTXTPF-00547659 225mg | Week12 | LONP2      | protein_coding       | chr16 | 48278207  | 48397033 +  | 9957  | 3007.403 | 0        | 0.260597 | 0.079746 | 3.267821 | 0.00121  | 0.084747 | 1 |
| ENSG00000198026.6  | TREATTXTPF-00547659 225mg | Week12 | ZNF335     | protein_coding       | chr20 | 44577292  | 44600833 -  | 7543  | 2813.775 | 0        | 0.199059 | 0.060916 | 3.267763 | 0.00121  | 0.084747 | 1 |
| ENSG00000141456.10 | TREATTXTPF-00547659 225mg | Week12 | PELP1      | protein_coding       | chr17 | 4574679   | 4607632 -   | 4967  | 1704.233 | 0        | 0.276185 | 0.084521 | 3.267636 | 0.00121  | 0.084747 | 1 |
| ENSG00000198056.9  | TREATTXTPF-00547659 225mg | Week12 | PRIM1      | protein_coding       | chr12 | 57125380  | 57146157 -  | 2437  | 235.2906 | 0.00221  | 0.391917 | 0.119944 | 3.267515 | 0.001211 | 0.084747 | 1 |
| ENSG00000116525.9  | TREATTXTPF-00547659 225mg | Week12 | TRIM62     | protein_coding       | chr1  | 33611003  | 33647660 -  | 3646  | 842.1867 | 0        | 0.200465 | 0.061359 | 3.267104 | 0.001213 | 0.084803 | 1 |
| ENSG00000065618.12 | TREATTXTPF-00547659 75mg  | Week12 | COL17A1    | protein_coding       | chr10 | 105791044 | 105845760 - | 6426  | 81.45856 | 0.026519 | -0.76634 | 0.234579 | -3.26685 | 0.001214 | 0.084814 | 1 |
| ENSG00000182866.12 | TREATTXTPF-00547659 75mg  | Week12 | LCK        | protein_coding       | chr1  | 32716840  | 32751766 +  | 3337  | 9265.387 | 0        | 0.322983 | 0.098888 | 3.266139 | 0.001217 | 0.084844 | 1 |
| ENSG00000204209.6  | TREATTXTPF-00547659 75mg  | Week12 | DAXX       | protein_coding       | chr6  | 33286335  | 33297046 -  | 3662  | 4215.895 | 0        | 0.167962 | 0.051425 | 3.266131 | 0.001217 | 0.084844 | 1 |
| ENSG00000021645.13 | TREATTXTPF-00547659 7.5mg | Week12 | NRXN3      | protein_coding       | chr14 | 78708734  | 80330762 +  | 11335 | 2.18674  | 0.633149 | -0.44445 | 0.13608  | -3.2661  | 0.001217 | 0.084844 | 1 |
| ENSG00000092068.14 | TREATTXTPF-00547659 75mg  | Week12 | SLC7A8     | protein_coding       | chr14 | 23594504  | 23652883 -  | 5942  | 181.0641 | 0.001105 | 0.4338   | 0.132835 | 3.265707 | 0.001218 | 0.084895 | 1 |
| ENSG00000120915.9  | TREATTXTPF-00547659 225mg | Week12 | EPHX2      | protein_coding       | chr8  | 27348296  | 27403081 +  | 4473  | 797.2055 | 0        | 0.402363 | 0.123223 | 3.265318 | 0.00122  | 0.084945 | 1 |
| ENSG00000172006.7  | TREATTXTPF-00547659 225mg | Week12 | ZNF554     | protein_coding       | chr19 | 2819872   | 2835771 +   | 4685  | 189.9812 | 0.001105 | 0.364917 | 0.111764 | 3.265052 | 0.001221 | 0.08496  | 1 |
| ENSG00000143258.11 | TREATTXTPF-00547659 225mg | Week12 | USP21      | protein_coding       | chr5  | 161129240 | 161135513 + | 3764  | 1345.789 | 0        | 0.200257 | 0.061342 | 3.264597 | 0.001223 | 0.084981 | 1 |
| ENSG00000011304.12 | TREATTXTPF-00547659 225mg | Week12 | PTBP1      | protein_coding       | chr19 | 797075    | 812327 +    | 6969  | 8882.601 | 0        | 0.205285 | 0.062886 | 3.264419 | 0.001224 | 0.084981 | 1 |
| ENSG00000232021.2  | TREATTXTPF-00547659 225mg | Week12 | LEF1-AS1   | processed_transcript | chr4  | 109088681 | 109177992 + | 4799  | 88.06077 | 0.00442  | 0.520853 | 0.159559 | 3.264334 | 0.001224 | 0.084981 | 1 |
| ENSG00000083635.7  | TREATTXTPF-00547659 225mg | Week12 | NUFIP1     | protein_coding       | chr13 | 45513384  | 45563618 -  | 3492  | 170.0387 | 0.00221  | 0.326904 | 0.100163 | 3.26373  | 0.001227 | 0.085087 | 1 |
| ENSG00000066117.10 | TREATTXTPF-00547659 75mg  | Week12 | SMARCD1    | protein_coding       | chr12 | 50478755  | 50494495 +  | 5136  | 2776.624 | 0        | 0.192529 | 0.058994 | 3.263539 | 0.001227 | 0.085087 | 1 |
| ENSG00000260879.1  | TREATTXTPF-00547659 7.5mg | Week12 | RP11-483l1 | antisense            | chr1  | 108742548 | 108744113 + | 1566  | 18.14033 | 0.027624 | 0.534139 | 0.1637   | 3.262904 | 0.00123  | 0.085209 | 1 |
| ENSG00000102606.13 | TREATTXTPF-00547659 225mg | Week12 | ARHGEF7    | protein_coding       | chr13 | 111766906 | 111958084 + | 11336 | 2274.354 | 0        | 0.230787 | 0.070737 | 3.262593 | 0.001231 | 0.08522  | 1 |
| ENSG00000187091.9  | TREATTXTPF-00547659 75mg  | Week12 | PLCD1      | protein_coding       | chr3  | 38048987  | 38071253 -  | 4314  | 899.4917 | 0        | 0.220008 | 0.067443 | 3.262121 | 0.001233 | 0.08522  | 1 |
| ENSG00000182183.10 | TREATTXTPF-00547659 225mg | Week12 | FAM159A    | protein_coding       | chr1  | 53099016  | 53135355 +  | 2508  | 366.7845 | 0.001105 | 0.346438 | 0.106205 | 3.261968 | 0.001234 | 0.08522  | 1 |
| ENSG00000179562.2  | TREATTXTPF-00547659 225mg | Week12 | GCC1       | protein_coding       | chr7  | 127220672 | 127233665 - | 4987  | 2379.685 | 0        | 0.157754 | 0.048362 | 3.261951 | 0.001234 | 0.08522  | 1 |
| ENSG00000071626.12 | TREATTXTPF-00547659 225mg | Week12 | DAZAP1     | protein_coding       | chr19 | 1407568   | 1435719 +   | 9272  | 4544.341 | 0        | 0.223837 | 0.068626 | 3.261676 | 0.001235 | 0.08522  | 1 |
| ENSG00000156304.10 | TREATTXTPF-00547659 225mg | Week12 | SCAF4      | protein_coding       | chr21 | 33043346  | 33104388 -  | 5901  | 2044.624 | 0        | 0.234297 | 0.071835 | 3.261582 | 0.001236 | 0.08522  | 1 |
| ENSG00000187554.7  | TREATTXTPF-00547659 75mg  | Week12 | TLR5       | protein_coding       | chr1  | 223282748 | 223316624 - | 4651  | 3011.295 | 0        | -0.38553 | 0.118228 | -3.26094 | 0.001238 | 0.085251 | 1 |
| ENSG00000139626.11 | TREATTXTPF-00547659 225mg | Week12 | ITGB7      | protein_coding       | chr12 | 53585102  | 53601091 -  | 4481  | 6900.704 | 0        | 0.313988 | 0.096303 | 3.260427 | 0.00124  | 0.085251 | 1 |

|                    |                            |        |           |                   |       |           |             |       |          |          |          |          |          |          |          |   |
|--------------------|----------------------------|--------|-----------|-------------------|-------|-----------|-------------|-------|----------|----------|----------|----------|----------|----------|----------|---|
| ENSG00000145982.7  | TREATTXTPF-00547659 225mg  | Week12 | FARS2     | protein_coding    | chr6  | 5261277   | 5771813 +   | 2351  | 398.1923 | 0        | 0.253893 | 0.077874 | 3.260317 | 0.001241 | 0.085251 | 1 |
| ENSG00000159202.13 | TREATTXTPF-00547659 225mg  | Week12 | UBE2Z     | protein_coding    | chr17 | 46985731  | 47006418 +  | 5753  | 4334.242 | 0        | 0.173643 | 0.053262 | 3.260181 | 0.001242 | 0.085251 | 1 |
| ENSG00000174807.3  | TREATTXTPF-00547659 225mg  | Week12 | CD248     | protein_coding    | chr11 | 66081958  | 66084515 -  | 2558  | 277.3006 | 0.003315 | 0.454327 | 0.139398 | 3.259211 | 0.001246 | 0.085251 | 1 |
| ENSG00000103343.8  | TREATTXTPF-00547659 75mg   | Week12 | ZNF174    | protein_coding    | chr16 | 3451235   | 3459370 +   | 2876  | 491.3448 | 0        | 0.183124 | 0.056189 | 3.259057 | 0.001246 | 0.085251 | 1 |
| ENSG00000147316.8  | TREATTXTPF-00547659 225mg  | Week12 | MCPH1     | protein_coding    | chr8  | 6264113   | 6501144 +   | 4894  | 537.6685 | 0        | 0.292014 | 0.089605 | 3.258909 | 0.001247 | 0.085251 | 1 |
| ENSG00000126790.7  | TREATTXTPF-00547659 225mg  | Week12 | L3HYPDH   | protein_coding    | chr14 | 59927081  | 59951148 -  | 3504  | 220.0221 | 0.003315 | 0.437032 | 0.134105 | 3.258884 | 0.001247 | 0.085251 | 1 |
| ENSG00000049618.17 | TREATTXTPF-00547659 225mg  | Week12 | ARID1B    | protein_coding    | chr6  | 157099063 | 157531913 + | 16334 | 2542.033 | 0        | 0.295509 | 0.090683 | 3.258715 | 0.001248 | 0.085251 | 1 |
| ENSG00000154767.10 | TREATTXTPF-00547659 225mg  | Week12 | XPC       | protein_coding    | chr3  | 14186647  | 14220283 -  | 4798  | 3765.66  | 0        | 0.184653 | 0.056668 | 3.258523 | 0.001249 | 0.085251 | 1 |
| ENSG00000168209.4  | TREATTXTPF-00547659 225mg  | Week12 | DDIT4     | protein_coding    | chr10 | 74033678  | 74035794 +  | 2058  | 2002.271 | 0        | 0.419717 | 0.128806 | 3.258519 | 0.001249 | 0.085251 | 1 |
| ENSG00000116478.7  | TREATTXTPF-00547659 225mg  | Week12 | HDAC1     | protein_coding    | chr1  | 32757687  | 32799236 +  | 4009  | 6182.453 | 0        | 0.187597 | 0.057572 | 3.258482 | 0.001249 | 0.085251 | 1 |
| ENSG00000112640.10 | TREATTXTPF-00547659 75mg   | Week12 | PPP2R5D   | protein_coding    | chr6  | 42952237  | 42980080 +  | 3314  | 2271.371 | 0        | 0.178248 | 0.054706 | 3.258278 | 0.00125  | 0.085251 | 1 |
| ENSG00000142230.7  | TREATTXTPF-00547659 225mg  | Week12 | SAE1      | protein_coding    | chr19 | 47616531  | 47713886 +  | 3389  | 2147.844 | 0        | 0.218413 | 0.067033 | 3.258273 | 0.00125  | 0.085251 | 1 |
| ENSG00000231074.4  | TREATTXTPF-00547659 225mg  | Week12 | HCG18     | antisense         | chr6  | 30255174  | 30294927 -  | 13918 | 997.8066 | 0        | 0.298043 | 0.091474 | 3.258219 | 0.00125  | 0.085251 | 1 |
| ENSG00000163687.9  | TREATTXTPF-00547659 225mg  | Week12 | DNASE1L3  | protein_coding    | chr3  | 58177984  | 58200424 -  | 3148  | 40.36685 | 0.032044 | 0.598966 | 0.183841 | 3.258074 | 0.00125  | 0.085251 | 1 |
| ENSG00000147130.10 | TREATTXTPF-00547659 225mg  | Week12 | MYM3      | protein_coding    | chrX  | 70459474  | 70474996 -  | 6916  | 1153.827 | 0        | 0.298551 | 0.091656 | 3.257311 | 0.001254 | 0.085315 | 1 |
| ENSG00000185875.8  | TREATTXTPF-00547659 225mg  | Week12 | THNSL1    | protein_coding    | chr10 | 25305587  | 25315593 +  | 3788  | 182.7834 | 0.00221  | 0.429735 | 0.131938 | 3.257091 | 0.001255 | 0.085315 | 1 |
| ENSG00000236609.3  | TREATTXTPF-00547659 225mg  | Week12 | ZNF853    | protein_coding    | chr7  | 6655248   | 6663921 +   | 3857  | 260.8884 | 0.001105 | 0.334724 | 0.102768 | 3.257073 | 0.001255 | 0.085315 | 1 |
| ENSG00000214999.3  | TREATTXTPF-00547659 225mg  | Week12 | AC129492  | protein_coding    | chr17 | 7982800   | 7984883 +   | 1804  | 56.3989  | 0.00884  | 0.45677  | 0.140243 | 3.257001 | 0.001255 | 0.085315 | 1 |
| ENSG00000104176.9  | TREATTXTPF-00547659 225mg  | Week12 | SYT15     | protein_coding    | chr10 | 46955444  | 46971400 -  | 7158  | 4.665193 | 0.311602 | 0.524884 | 0.161166 | 3.256799 | 0.001256 | 0.085315 | 1 |
| ENSG00000103723.8  | TREATTXTPF-00547659 22.5mg | Week12 | AP3B2     | protein_coding    | chr15 | 83328033  | 83378666 -  | 7514  | 160.9602 | 0.01326  | -0.78973 | 0.242529 | -3.25622 | 0.001258 | 0.085366 | 1 |
| ENSG00000131323.10 | TREATTXTPF-00547659 225mg  | Week12 | TRAF3     | protein_coding    | chr14 | 103243813 | 103377837 + | 8263  | 2041.055 | 0        | 0.274656 | 0.084348 | 3.256205 | 0.001258 | 0.085366 | 1 |
| ENSG00000196581.6  | TREATTXTPF-00547659 225mg  | Week12 | AJAP1     | protein_coding    | chr1  | 4714792   | 4852594 +   | 12405 | 38.62431 | 0.069613 | 0.657208 | 0.20185  | 3.25592  | 0.00126  | 0.085382 | 1 |
| ENSG00000109685.13 | TREATTXTPF-00547659 225mg  | Week12 | WHSC1     | protein_coding    | chr4  | 1873151   | 1983934 +   | 19776 | 1442.506 | 0        | 0.285021 | 0.087546 | 3.255668 | 0.001261 | 0.085382 | 1 |
| ENSG00000163050.12 | TREATTXTPF-00547659 75mg   | Week12 | ADCK3     | protein_coding    | chr1  | 227085237 | 227175246 + | 7797  | 3322.962 | 0        | 0.193492 | 0.059435 | 3.255517 | 0.001261 | 0.085382 | 1 |
| ENSG00000211785.1  | TREATTXTPF-00547659 75mg   | Week12 | TRAV12-1  | TR_V_gene         | chr14 | 22309422  | 22309956 +  | 340   | 201.0718 | 0.00221  | 0.485249 | 0.149099 | 3.254535 | 0.001266 | 0.085607 | 1 |
| ENSG00000178719.12 | TREATTXTPF-00547659 225mg  | Week12 | GRINA     | protein_coding    | chr8  | 145064226 | 145067583 + | 2527  | 18478.83 | 0        | -0.32117 | 0.098699 | -3.25403 | 0.001268 | 0.085686 | 1 |
| ENSG00000106695.10 | TREATTXTPF-00547659 225mg  | Week12 | VPS11     | protein_coding    | chr11 | 118938403 | 118952688 + | 5906  | 2833.44  | 0        | 0.194122 | 0.059669 | 3.253308 | 0.001271 | 0.085686 | 1 |
| ENSG00000129277.9  | TREATTXTPF-00547659 75mg   | Week12 | CCL4      | protein_coding    | chr17 | 34430983  | 34433014 +  | 2032  | 796.295  | 0        | 0.384217 | 0.118101 | 3.253285 | 0.001271 | 0.085686 | 1 |
| ENSG00000146904.4  | TREATTXTPF-00547659 225mg  | Week12 | EPHA1     | protein_coding    | chr7  | 143087382 | 143105985 - | 4733  | 468.9691 | 0        | 0.37189  | 0.114312 | 3.253279 | 0.001271 | 0.085686 | 1 |
| ENSG00000133226.12 | TREATTXTPF-00547659 225mg  | Week12 | SRRM1     | protein_coding    | chr1  | 24958207  | 24999758 +  | 8168  | 3639.914 | 0        | 0.263564 | 0.081016 | 3.253217 | 0.001271 | 0.085686 | 1 |
| ENSG00000211797.2  | TREATTXTPF-00547659 75mg   | Week12 | TRAV17    | TR_V_gene         | chr14 | 22465778  | 22466407 +  | 484   | 206.5215 | 0.003315 | 0.439821 | 0.135217 | 3.252714 | 0.001273 | 0.085771 | 1 |
| ENSG00000123119.7  | TREATTXTPF-00547659 22.5mg | Week12 | NECAB1    | protein_coding    | chr8  | 91803778  | 91971636 +  | 6408  | 22.03094 | 0.475138 | -0.96728 | 0.297468 | -3.25171 | 0.001278 | 0.086003 | 1 |
| ENSG0000011523.9   | TREATTXTPF-00547659 225mg  | Week12 | CEP68     | protein_coding    | chr2  | 65283500  | 65314138 +  | 8623  | 944.9061 | 0        | 0.334231 | 0.102845 | 3.249839 | 0.001286 | 0.086279 | 1 |
| ENSG00000151846.7  | TREATTXTPF-00547659 225mg  | Week12 | PABPC3    | protein_coding    | chr13 | 25670300  | 25673389 +  | 3090  | 76.15249 | 0.001105 | 0.4264   | 0.131209 | 3.249786 | 0.001286 | 0.086279 | 1 |
| ENSG00000090470.10 | TREATTXTPF-00547659 225mg  | Week12 | PDCD7     | protein_coding    | chr15 | 65409717  | 65426174 -  | 3263  | 876.0409 | 0        | 0.288579 | 0.0888   | 3.249767 | 0.001286 | 0.086279 | 1 |
| ENSG00000203288.3  | TREATTXTPF-00547659 225mg  | Week12 | RP11-98D  | antisense         | chr1  | 151763280 | 151766878 + | 1141  | 22.72376 | 0.023204 | 0.498898 | 0.153522 | 3.249686 | 0.001287 | 0.086279 | 1 |
| ENSG00000054611.9  | TREATTXTPF-00547659 225mg  | Week12 | TBC1D22A  | protein_coding    | chr22 | 47158518  | 47571336 +  | 5305  | 2824.087 | 0        | 0.139948 | 0.043065 | 3.24967  | 0.001287 | 0.086279 | 1 |
| ENSG00000205903.2  | TREATTXTPF-00547659 225mg  | Week12 | ZNF316    | pseudogene        | chr7  | 6676953   | 6694242 +   | 3571  | 1162.039 | 0        | 0.306045 | 0.094182 | 3.249516 | 0.001287 | 0.086279 | 1 |
| ENSG00000221978.7  | TREATTXTPF-00547659 225mg  | Week12 | CENL2     | protein_coding    | chr1  | 1321091   | 1334708 -   | 6835  | 5285.983 | 0        | 0.240511 | 0.074034 | 3.248648 | 0.001291 | 0.086472 | 1 |
| ENSG00000091490.6  | TREATTXTPF-00547659 225mg  | Week12 | SELLL3    | protein_coding    | chr4  | 25749055  | 25865382 -  | 7483  | 3583.697 | 0        | 0.312106 | 0.096094 | 3.247934 | 0.001294 | 0.086485 | 1 |
| ENSG00000261773.1  | TREATTXTPF-00547659 225mg  | Week12 | WI2-8903  | sense_overlapping | chrX  | 153746164 | 153746955 - | 792   | 7.21768  | 0.112707 | 0.489243 | 0.150634 | 3.247885 | 0.001295 | 0.086485 | 1 |
| ENSG00000131797.8  | TREATTXTPF-00547659 225mg  | Week12 | CLUHP3    | pseudogene        | chr16 | 31711911  | 31721097 +  | 4025  | 532.8961 | 0.001105 | 0.480243 | 0.147867 | 3.247811 | 0.001295 | 0.086485 | 1 |
| ENSG00000114812.8  | TREATTXTPF-00547659 225mg  | Week12 | VIPR1     | protein_coding    | chr3  | 42530791  | 42579059 +  | 7378  | 1531.134 | 0        | 0.275709 | 0.084899 | 3.24751  | 0.001296 | 0.086485 | 1 |
| ENSG00000232842.2  | TREATTXTPF-00547659 225mg  | Week12 | RP5-961K1 | pseudogene        | chrX  | 95228327  | 95229314 -  | 988   | 2.550276 | 0.472928 | 0.438389 | 0.134999 | 3.247359 | 0.001297 | 0.086485 | 1 |
| ENSG00000125755.14 | TREATTXTPF-00547659 225mg  | Week12 | SYMPK     | protein_coding    | chr19 | 46318668  | 46366548 -  | 10628 | 3956.559 | 0        | 0.199855 | 0.061548 | 3.247171 | 0.001298 | 0.086485 | 1 |
| ENSG0000021300.9   | TREATTXTPF-00547659 225mg  | Week12 | PLEKHB1   | protein_coding    | chr11 | 73357223  | 73373864 +  | 4933  | 992.0475 | 0        | 0.380894 | 0.117301 | 3.247152 | 0.001298 | 0.086485 | 1 |
| ENSG00000258301.2  | TREATTXTPF-00547659 225mg  | Week12 | RP11-488C | lincRNA           | chr14 | 77248083  | 77253067 -  | 1836  | 329.8939 | 0        | 0.287063 | 0.088419 | 3.246626 | 0.0013   | 0.086507 | 1 |
| ENSG00000089057.10 | TREATTXTPF-00547659 225mg  | Week12 | SLC23A2   | protein_coding    | chr20 | 4833002   | 4990939 -   | 7523  | 2129.916 | 0        | 0.30841  | 0.094996 | 3.246549 | 0.0013   | 0.086507 | 1 |
| ENSG00000137310.7  | TREATTXTPF-00547659 225mg  | Week12 | TCF19     | protein_coding    | chr6  | 31126319  | 31134936 +  | 3538  | 434.5757 | 0        | 0.289626 | 0.089213 | 3.246457 | 0.001301 | 0.086507 | 1 |
| ENSG00000105519.8  | TREATTXTPF-00547659 225mg  | Week12 | CAPS      | protein_coding    | chr19 | 5911718   | 5915888 +   | 4097  | 1436.64  | 0        | 0.266528 | 0.082114 | 3.245848 | 0.001304 | 0.086625 | 1 |
| ENSG00000154016.9  | TREATTXTPF-00547659 225mg  | Week12 | GRAP      | protein_coding    | chr17 | 18923986  | 18950950 -  | 3107  | 2279.72  | 0        | 0.333897 | 0.102881 | 3.245454 | 0.001305 | 0.086668 | 1 |
| ENSG00000179364.9  | TREATTXTPF-00547659 225mg  | Week12 | PACS2     | protein_coding    | chr14 | 105766900 | 105864484 + | 12363 | 1789.146 | 0        | 0.247489 | 0.076268 | 3.244989 | 0.001307 | 0.086724 | 1 |
| ENSG00000272057.1  | TREATTXTPF-00547659 7.5mg  | Week12 | CTB-40H1  | lincRNA           | chr5  | 14872441  | 14872822 +  | 382   | 1.228729 | 0.704972 | -0.35031 | 0.107959 | -3.24489 | 0.001308 | 0.086724 | 1 |

|                    |                           |        |                     |                      |       |           |             |       |          |          |          |          |          |          |          |   |
|--------------------|---------------------------|--------|---------------------|----------------------|-------|-----------|-------------|-------|----------|----------|----------|----------|----------|----------|----------|---|
| ENSG00000012124.10 | TREATTXTPF-00547659 75mg  | Week12 | CD22                | protein_coding       | chr19 | 35810164  | 35838258 +  | 5839  | 2954.065 | 0        | 0.372591 | 0.114833 | 3.244464 | 0.001309 | 0.086725 | 1 |
| ENSG00000089597.12 | TREATTXTPF-00547659 225mg | Week12 | GANAB               | protein_coding       | chr11 | 62392298  | 62414104 -  | 4933  | 9047.098 | 0        | 0.202765 | 0.062496 | 3.244474 | 0.00131  | 0.086725 | 1 |
| ENSG00000204946.5  | TREATTXTPF-00547659 225mg | Week12 | ZNF783              | protein_coding       | chr7  | 148959262 | 148994393 + | 7170  | 1177.158 | 0        | 0.278774 | 0.085937 | 3.243942 | 0.001312 | 0.086822 | 1 |
| ENSG00000105227.10 | TREATTXTPF-00547659 225mg | Week12 | PRX                 | protein_coding       | chr19 | 40899675  | 40919273 -  | 5767  | 189.979  | 0        | 0.327859 | 0.101077 | 3.243642 | 0.001313 | 0.086849 | 1 |
| ENSG00000130816.10 | TREATTXTPF-00547659 225mg | Week12 | DNMT1               | protein_coding       | chr19 | 10244021  | 10341962 -  | 9805  | 3211.509 | 0        | 0.29935  | 0.092301 | 3.243181 | 0.001315 | 0.086891 | 1 |
| ENSG00000166669.9  | TREATTXTPF-00547659 225mg | Week12 | ATF7IP2             | protein_coding       | chr16 | 10420291  | 10577495 +  | 6391  | 572.7381 | 0        | 0.335758 | 0.103532 | 3.243047 | 0.001316 | 0.086891 | 1 |
| ENSG00000103723.8  | TREATTXTPF-00547659 75mg  | Week12 | AP3B2               | protein_coding       | chr15 | 83328033  | 83378666 -  | 7514  | 160.9602 | 0.01326  | -0.77639 | 0.23942  | -3.24281 | 0.001317 | 0.086891 | 1 |
| ENSG00000235944.3  | TREATTXTPF-00547659 225mg | Week12 | ZNF815P             | pseudogene           | chr7  | 5862791   | 5894066 +   | 3325  | 355.4829 | 0.001105 | 0.315231 | 0.097214 | 3.242655 | 0.001318 | 0.086891 | 1 |
| ENSG00000176472.6  | TREATTXTPF-00547659 225mg | Week12 | ZNF575              | protein_coding       | chr19 | 44029649  | 44040282 +  | 3222  | 136.3823 | 0.00221  | 0.314162 | 0.096889 | 3.242475 | 0.001318 | 0.086891 | 1 |
| ENSG00000198589.6  | TREATTXTPF-00547659 225mg | Week12 | LRBA                | protein_coding       | chr4  | 151185594 | 151936879 - | 15018 | 1524.032 | 0        | 0.340461 | 0.105013 | 3.242097 | 0.00132  | 0.086942 | 1 |
| ENSG00000266408.1  | TREATTXTPF-00547659 225mg | Week12 | AL122127.           | miRNA                | chr14 | 106324723 | 106324792 - | 70    | 63.35801 | 0.01326  | 0.608785 | 0.187797 | 3.241722 | 0.001322 | 0.086976 | 1 |
| ENSG00000119720.13 | TREATTXTPF-00547659 225mg | Week12 | NRDE2               | protein_coding       | chr14 | 90742580  | 90798481 -  | 6777  | 872.7657 | 0        | 0.146552 | 0.045211 | 3.241485 | 0.001323 | 0.086976 | 1 |
| ENSG00000111716.8  | TREATTXTPF-00547659 225mg | Week12 | LDHB                | protein_coding       | chr12 | 21788276  | 21910791 -  | 2983  | 12060.28 | 0        | 0.316697 | 0.097707 | 3.241278 | 0.001324 | 0.086976 | 1 |
| ENSG00000182979.13 | TREATTXTPF-00547659 225mg | Week12 | MTA1                | protein_coding       | chr14 | 105886159 | 105937066 + | 6964  | 1836.579 | 0        | 0.266017 | 0.082074 | 3.241163 | 0.001324 | 0.086976 | 1 |
| ENSG00000138794.5  | TREATTXTPF-00547659 225mg | Week12 | CASP6               | protein_coding       | chr4  | 110609785 | 110624739 - | 1936  | 330.7293 | 0        | 0.270847 | 0.083576 | 3.240747 | 0.001326 | 0.087038 | 1 |
| ENSG00000136891.9  | TREATTXTPF-00547659 225mg | Week12 | TEX10               | protein_coding       | chr9  | 103064359 | 103115221 - | 7628  | 647.558  | 0        | 0.271597 | 0.083822 | 3.240173 | 0.001329 | 0.087075 | 1 |
| ENSG00000261777.1  | TREATTXTPF-00547659 225mg | Week12 | RP11-529f           | processed_transcript | chr16 | 70349543  | 70380650 -  | 1508  | 9.534807 | 0.085083 | 0.493397 | 0.15228  | 3.240066 | 0.001329 | 0.087075 | 1 |
| ENSG00000260719.1  | TREATTXTPF-00547659 225mg | Week12 | AC009133            | antisense            | chr16 | 29756568  | 29759620 +  | 1656  | 226.021  | 0.001105 | 0.432824 | 0.133587 | 3.240009 | 0.00133  | 0.087075 | 1 |
| ENSG00000105088.4  | TREATTXTPF-00547659 225mg | Week12 | TREATTXTPF-00547659 | protein_coding       | chr19 | 9964394   | 10047228 -  | 2500  | 470.3657 | 0        | 0.304383 | 0.093958 | 3.239563 | 0.001332 | 0.087146 | 1 |
| ENSG00000100353.13 | TREATTXTPF-00547659 225mg | Week12 | EIF3D               | protein_coding       | chr22 | 36906897  | 36925483 -  | 4070  | 9515.846 | 0        | 0.195538 | 0.060372 | 3.238896 | 0.001335 | 0.087186 | 1 |
| ENSG00000108669.12 | TREATTXTPF-00547659 225mg | Week12 | CYTH1               | protein_coding       | chr17 | 76670130  | 76778379 -  | 7754  | 20095.6  | 0        | 0.176685 | 0.054556 | 3.238611 | 0.001336 | 0.087186 | 1 |
| ENSG00000197363.5  | TREATTXTPF-00547659 225mg | Week12 | ZNF517              | protein_coding       | chr8  | 146024261 | 146036554 + | 5308  | 293.4829 | 0        | 0.265073 | 0.081848 | 3.238594 | 0.001336 | 0.087186 | 1 |
| ENSG00000101040.15 | TREATTXTPF-00547659 225mg | Week12 | ZMYND8              | protein_coding       | chr20 | 45837859  | 45985567 -  | 7684  | 1650.103 | 0        | 0.207514 | 0.064077 | 3.238519 | 0.001336 | 0.087186 | 1 |
| ENSG00000263072.1  | TREATTXTPF-00547659 225mg | Week12 | RP11-473f           | antisense            | chr16 | 3166043   | 3184883 -   | 3276  | 326.4254 | 0        | 0.277182 | 0.085592 | 3.238394 | 0.001337 | 0.087186 | 1 |
| ENSG00000154027.14 | TREATTXTPF-00547659 225mg | Week12 | AK5                 | protein_coding       | chr1  | 77747736  | 78025651 +  | 6916  | 337.9669 | 0.001105 | 0.424209 | 0.131001 | 3.238199 | 0.001338 | 0.087186 | 1 |
| ENSG00000137478.10 | TREATTXTPF-00547659 225mg | Week12 | FCHSD2              | protein_coding       | chr11 | 72547790  | 72853306 -  | 5188  | 3080.79  | 0        | 0.234976 | 0.072571 | 3.23785  | 0.001339 | 0.087186 | 1 |
| ENSG00000198286.5  | TREATTXTPF-00547659 75mg  | Week12 | CARD11              | protein_coding       | chr7  | 2945775   | 3083579 -   | 4707  | 4237.683 | 0        | 0.304164 | 0.093941 | 3.237803 | 0.00134  | 0.087186 | 1 |
| ENSG00000242028.1  | TREATTXTPF-00547659 225mg | Week12 | HYPK                | protein_coding       | chr15 | 44088340  | 44095241 +  | 6393  | 161.0541 | 0.003315 | 0.399071 | 0.123286 | 3.236968 | 0.001343 | 0.087373 | 1 |
| ENSG00000169877.5  | TREATTXTPF-00547659 225mg | Week12 | AHSP                | protein_coding       | chr16 | 31539185  | 31540124 +  | 562   | 2309.464 | 0        | -0.70491 | 0.217845 | -3.23584 | 0.001348 | 0.087646 | 1 |
| ENSG00000198910.8  | TREATTXTPF-00547659 225mg | Week12 | L1CAM               | protein_coding       | chrX  | 153126969 | 153174677 - | 7443  | 40.5989  | 0.007735 | 0.446118 | 0.137902 | 3.235036 | 0.001352 | 0.087739 | 1 |
| ENSG00000167633.12 | TREATTXTPF-00547659 75mg  | Week12 | KIR3DL1             | protein_coding       | chr19 | 55235969  | 55378448 +  | 2568  | 221.1845 | 0.00221  | 0.539526 | 0.166789 | 3.234769 | 0.001353 | 0.087739 | 1 |
| ENSG00000178093.12 | TREATTXTPF-00547659 225mg | Week12 | TSSK6               | protein_coding       | chr19 | 19623227  | 19626838 -  | 2516  | 162.5724 | 0        | 0.299311 | 0.092533 | 3.23465  | 0.001354 | 0.087739 | 1 |
| ENSG00000163399.11 | TREATTXTPF-00547659 225mg | Week12 | ATP1A1              | protein_coding       | chr1  | 116915290 | 116952883 + | 7261  | 11338.57 | 0        | 0.248635 | 0.076871 | 3.234426 | 0.001355 | 0.087739 | 1 |
| ENSG00000127481.10 | TREATTXTPF-00547659 225mg | Week12 | UBR4                | protein_coding       | chr1  | 19401000  | 19536770 -  | 24695 | 6543.962 | 0        | 0.184976 | 0.057191 | 3.234357 | 0.001355 | 0.087739 | 1 |
| ENSG00000110660.10 | TREATTXTPF-00547659 225mg | Week12 | SLC35F2             | protein_coding       | chr11 | 107661717 | 107799019 - | 3717  | 218.2652 | 0.001105 | 0.414462 | 0.128145 | 3.234317 | 0.001355 | 0.087739 | 1 |
| ENSG00000090924.10 | TREATTXTPF-00547659 225mg | Week12 | PLEKHG2             | protein_coding       | chr19 | 39903225  | 39919054 +  | 9199  | 879.3359 | 0        | 0.308598 | 0.095422 | 3.23405  | 0.001357 | 0.087758 | 1 |
| ENSG00000144043.7  | TREATTXTPF-00547659 225mg | Week12 | TEX261              | protein_coding       | chr2  | 71213068  | 71222075 -  | 4260  | 3222.189 | 0        | 0.163412 | 0.050537 | 3.233541 | 0.001359 | 0.08785  | 1 |
| ENSG00000160803.7  | TREATTXTPF-00547659 225mg | Week12 | UBQLN4              | protein_coding       | chr1  | 156005092 | 156023585 - | 3878  | 1315.456 | 0        | 0.261254 | 0.080808 | 3.233021 | 0.001361 | 0.08793  | 1 |
| ENSG00000101224.13 | TREATTXTPF-00547659 75mg  | Week12 | CDC25B              | protein_coding       | chr20 | 3767578   | 3786762 +   | 4149  | 7696.788 | 0        | 0.326224 | 0.100908 | 3.232867 | 0.001362 | 0.08793  | 1 |
| ENSG00000126870.11 | TREATTXTPF-00547659 225mg | Week12 | WDR60               | protein_coding       | chr7  | 158649269 | 158749438 + | 6667  | 273.7425 | 0.001105 | 0.342974 | 0.106111 | 3.23223  | 0.001365 | 0.088021 | 1 |
| ENSG00000167778.4  | TREATTXTPF-00547659 225mg | Week12 | SPRYD3              | protein_coding       | chr12 | 53458388  | 53473204 -  | 3191  | 3001.37  | 0        | 0.166499 | 0.051518 | 3.231847 | 0.001367 | 0.088021 | 1 |
| ENSG00000189114.6  | TREATTXTPF-00547659 225mg | Week12 | BLOC1S3             | protein_coding       | chr19 | 45682003  | 45685059 +  | 2666  | 1520.355 | 0        | 0.160219 | 0.049576 | 3.231767 | 0.001367 | 0.088021 | 1 |
| ENSG00000225828.1  | TREATTXTPF-00547659 225mg | Week12 | FAM229A             | protein_coding       | chr1  | 32826871  | 32829879 -  | 2845  | 830.547  | 0        | 0.241525 | 0.074736 | 3.231724 | 0.001367 | 0.088021 | 1 |
| ENSG00000197037.6  | TREATTXTPF-00547659 225mg | Week12 | ZSCAN25             | protein_coding       | chr7  | 99214569  | 99230030 +  | 7094  | 742.7812 | 0        | 0.252896 | 0.078258 | 3.231553 | 0.001368 | 0.088021 | 1 |
| ENSG00000127526.9  | TREATTXTPF-00547659 225mg | Week12 | SLC35E1             | protein_coding       | chr19 | 16660642  | 16683193 -  | 7257  | 2145.928 | 0        | 0.167306 | 0.05178  | 3.231102 | 0.00137  | 0.088021 | 1 |
| ENSG00000172053.10 | TREATTXTPF-00547659 225mg | Week12 | QARS                | protein_coding       | chr3  | 49133365  | 49142553 -  | 4576  | 6965.223 | 0        | 0.207145 | 0.064111 | 3.231056 | 0.00137  | 0.088021 | 1 |
| ENSG00000186017.10 | TREATTXTPF-00547659 225mg | Week12 | ZNF566              | protein_coding       | chr19 | 36936021  | 36980804 -  | 6481  | 192.1912 | 0.001105 | 0.439115 | 0.135911 | 3.230898 | 0.001371 | 0.088021 | 1 |
| ENSG00000182109.3  | TREATTXTPF-00547659 225mg | Week12 | RP11-69E1           | antisense            | chr1  | 39987952  | 40011859 -  | 3059  | 226.6265 | 0.001105 | 0.353027 | 0.109276 | 3.230606 | 0.001373 | 0.088021 | 1 |
| ENSG00000117868.11 | TREATTXTPF-00547659 225mg | Week12 | ESYT2               | protein_coding       | chr7  | 158523686 | 158622944 - | 7094  | 4308.503 | 0        | 0.28708  | 0.088864 | 3.230554 | 0.001373 | 0.088021 | 1 |
| ENSG00000061936.5  | TREATTXTPF-00547659 225mg | Week12 | SFSWAP              | protein_coding       | chr12 | 132195626 | 132284282 + | 10157 | 2454.543 | 0        | 0.157958 | 0.048898 | 3.230328 | 0.001374 | 0.088029 | 1 |
| ENSG00000104689.5  | TREATTXTPF-00547659 225mg | Week12 | TNFRSF10.           | protein_coding       | chr8  | 23047965  | 23082639 -  | 2951  | 554.5017 | 0        | 0.346893 | 0.107394 | 3.230091 | 0.001375 | 0.08804  | 1 |
| ENSG00000118971.3  | TREATTXTPF-00547659 225mg | Week12 | CCND2               | protein_coding       | chr12 | 4382938   | 4414516 +   | 7157  | 4197.667 | 0        | 0.29535  | 0.091453 | 3.229518 | 0.001378 | 0.088107 | 1 |
| ENSG00000140743.3  | TREATTXTPF-00547659 75mg  | Week12 | CDR2                | protein_coding       | chr16 | 22357257  | 22448486 -  | 3948  | 1284.038 | 0        | 0.324943 | 0.100624 | 3.229268 | 0.001379 | 0.088107 | 1 |

|                    |                            |        |           |                   |       |           |             |       |          |          |          |          |          |          |          |   |
|--------------------|----------------------------|--------|-----------|-------------------|-------|-----------|-------------|-------|----------|----------|----------|----------|----------|----------|----------|---|
| ENSG00000160856.16 | TREATTXTPF-00547659 225mg  | Week12 | FCRL3     | protein_coding    | chr1  | 157644111 | 157670647 - | 6538  | 1733.614 | 0        | 0.380266 | 0.117756 | 3.229265 | 0.001379 | 0.088107 | 1 |
| ENSG00000141524.11 | TREATTXTPF-00547659 225mg  | Week12 | TM6C      | protein_coding    | chr17 | 76106539  | 76128488 -  | 8669  | 8644.362 | 0        | 0.238185 | 0.073777 | 3.22844  | 0.001383 | 0.088294 | 1 |
| ENSG00000173114.8  | TREATTXTPF-00547659 225mg  | Week12 | LRRN3     | protein_coding    | chr7  | 110731062 | 110765510 + | 3875  | 384.6221 | 0.001105 | 0.557324 | 0.172698 | 3.227154 | 0.001389 | 0.088496 | 1 |
| ENSG00000106948.12 | TREATTXTPF-00547659 225mg  | Week12 | AKNA      | protein_coding    | chr9  | 117096436 | 117156685 - | 10601 | 36421.52 | 0        | 0.162638 | 0.050398 | 3.227008 | 0.001389 | 0.088496 | 1 |
| ENSG00000125630.11 | TREATTXTPF-00547659 225mg  | Week12 | POLR1B    | protein_coding    | chr2  | 113299492 | 113334635 + | 6237  | 888.1414 | 0        | 0.297994 | 0.092344 | 3.227001 | 0.001389 | 0.088496 | 1 |
| ENSG00000144036.10 | TREATTXTPF-00547659 225mg  | Week12 | EXOC6B    | protein_coding    | chr2  | 72403113  | 73053170 -  | 10185 | 317.7193 | 0        | 0.308889 | 0.095726 | 3.226814 | 0.00139  | 0.088496 | 1 |
| ENSG00000165138.12 | TREATTXTPF-00547659 225mg  | Week12 | ANKS6     | protein_coding    | chr9  | 101493611 | 101559247 - | 8804  | 355.5061 | 0.001105 | 0.362918 | 0.112471 | 3.226768 | 0.00139  | 0.088496 | 1 |
| ENSG00000259407.1  | TREATTXTPF-00547659 225mg  | Week12 | RP11-158H | antisense         | chr15 | 86287340  | 86293512 -  | 964   | 9.61547  | 0.117127 | 0.549716 | 0.170397 | 3.226082 | 0.001394 | 0.088641 | 1 |
| ENSG00000170128.2  | TREATTXTPF-00547659 75mg   | Week12 | GPR25     | protein_coding    | chr1  | 200842083 | 200843306 + | 1224  | 124.6243 | 0.003315 | 0.463219 | 0.1436   | 3.225761 | 0.001395 | 0.088664 | 1 |
| ENSG00000168883.15 | TREATTXTPF-00547659 225mg  | Week12 | USP39     | protein_coding    | chr2  | 85829979  | 85876403 +  | 3950  | 2456.758 | 0        | 0.151799 | 0.047061 | 3.225611 | 0.001396 | 0.088664 | 1 |
| ENSG00000241657.1  | TREATTXTPF-00547659 75mg   | Week12 | TRBV11-2  | lincRNA           | chr7  | 142197570 | 142198069 - | 408   | 169.2011 | 0.001105 | 0.414295 | 0.128451 | 3.225319 | 0.001397 | 0.088692 | 1 |
| ENSG00000196313.7  | TREATTXTPF-00547659 225mg  | Week12 | POM121    | protein_coding    | chr7  | 72349936  | 72421979 +  | 9818  | 2260.602 | 0        | 0.23825  | 0.073877 | 3.224965 | 0.001399 | 0.088738 | 1 |
| ENSG00000087085.9  | TREATTXTPF-00547659 225mg  | Week12 | ACHE      | protein_coding    | chr7  | 100487615 | 100494594 - | 3730  | 115.8519 | 0.007735 | -0.77335 | 0.239816 | -3.22477 | 0.0014   | 0.088738 | 1 |
| ENSG00000108557.13 | TREATTXTPF-00547659 225mg  | Week12 | RAI1      | protein_coding    | chr17 | 17584787  | 17714767 +  | 9696  | 865.5149 | 0        | 0.310211 | 0.096208 | 3.224375 | 0.001402 | 0.088779 | 1 |
| ENSG00000125084.7  | TREATTXTPF-00547659 225mg  | Week12 | WNT1      | protein_coding    | chr12 | 49372398  | 49375459 +  | 1185  | 18.53591 | 0.025414 | 0.5031   | 0.156037 | 3.224234 | 0.001402 | 0.088779 | 1 |
| ENSG00000250687.2  | TREATTXTPF-00547659 225mg  | Week12 | RP11-497H | pseudogene        | chr5  | 69758071  | 69775042 +  | 1104  | 137.8464 | 0.003315 | -0.48325 | 0.149911 | -3.2236  | 0.001405 | 0.088873 | 1 |
| ENSG00000052841.10 | TREATTXTPF-00547659 225mg  | Week12 | TTC17     | protein_coding    | chr11 | 43380482  | 43516483 +  | 11284 | 2968.246 | 0        | 0.2233   | 0.069274 | 3.223442 | 0.001406 | 0.088873 | 1 |
| ENSG00000185104.15 | TREATTXTPF-00547659 225mg  | Week12 | FAF1      | protein_coding    | chr1  | 50905150  | 51425935 -  | 5263  | 1114.735 | 0        | 0.22905  | 0.071065 | 3.223121 | 0.001408 | 0.088873 | 1 |
| ENSG00000273290.1  | TREATTXTPF-00547659 225mg  | Week12 | CTC-297N  | lincRNA           | chr17 | 10575791  | 10579423 -  | 3533  | 477.5381 | 0.001105 | 0.303537 | 0.094179 | 3.222992 | 0.001408 | 0.088873 | 1 |
| ENSG00000100453.8  | TREATTXTPF-00547659 75mg   | Week12 | GZMB      | protein_coding    | chr14 | 25100160  | 25103473 -  | 1408  | 3166.809 | 0        | 0.407209 | 0.126356 | 3.222722 | 0.00141  | 0.088873 | 1 |
| ENSG00000153395.5  | TREATTXTPF-00547659 75mg   | Week12 | LPCAT1    | protein_coding    | chr5  | 1456595   | 1524092 -   | 6494  | 9580.053 | 0        | 0.170157 | 0.052803 | 3.22252  | 0.001411 | 0.088873 | 1 |
| ENSG00000185252.13 | TREATTXTPF-00547659 225mg  | Week12 | ZNF74     | protein_coding    | chr22 | 20748405  | 20762745 +  | 6245  | 429.1293 | 0        | 0.293112 | 0.090958 | 3.22249  | 0.001411 | 0.088873 | 1 |
| ENSG00000156510.11 | TREATTXTPF-00547659 225mg  | Week12 | HKDC1     | protein_coding    | chr10 | 70980059  | 71027315 +  | 4308  | 227.7171 | 0.001105 | 0.398881 | 0.123802 | 3.221929 | 0.001413 | 0.088873 | 1 |
| ENSG00000137070.13 | TREATTXTPF-00547659 225mg  | Week12 | IL11RA    | protein_coding    | chr9  | 34650699  | 34661889 +  | 4271  | 1118.883 | 0        | 0.371644 | 0.115354 | 3.221759 | 0.001414 | 0.088873 | 1 |
| ENSG00000186265.5  | TREATTXTPF-00547659 225mg  | Week12 | BTLA      | protein_coding    | chr3  | 112182815 | 112218408 - | 3697  | 540.7602 | 0.001105 | 0.475004 | 0.147444 | 3.221586 | 0.001415 | 0.088873 | 1 |
| ENSG00000056558.6  | TREATTXTPF-00547659 225mg  | Week12 | TRAF1     | protein_coding    | chr9  | 123664671 | 123691451 - | 6449  | 3235.334 | 0        | 0.372931 | 0.115762 | 3.221536 | 0.001415 | 0.088873 | 1 |
| ENSG00000063180.4  | TREATTXTPF-00547659 225mg  | Week12 | CA11      | protein_coding    | chr19 | 49141199  | 49149569 -  | 2075  | 211.2862 | 0.001105 | 0.351537 | 0.109123 | 3.221475 | 0.001415 | 0.088873 | 1 |
| ENSG00000085998.9  | TREATTXTPF-00547659 225mg  | Week12 | POMGNT1   | protein_coding    | chr1  | 46654354  | 46685977 -  | 6366  | 938.979  | 0        | 0.279292 | 0.0867   | 3.22136  | 0.001416 | 0.088873 | 1 |
| ENSG00000116525.9  | TREATTXTPF-00547659 75mg   | Week12 | TRIM62    | protein_coding    | chr1  | 33611003  | 33647660 -  | 3646  | 842.1867 | 0        | 0.192297 | 0.0597   | 3.221066 | 0.001417 | 0.088902 | 1 |
| ENSG00000127903.12 | TREATTXTPF-00547659 225mg  | Week12 | ZNF835    | protein_coding    | chr19 | 57174020  | 57183151 -  | 2802  | 53.95138 | 0.007735 | 0.468688 | 0.145527 | 3.220619 | 0.00142  | 0.088977 | 1 |
| ENSG00000114982.13 | TREATTXTPF-00547659 225mg  | Week12 | KANSL3    | protein_coding    | chr2  | 97258907  | 97308524 -  | 9015  | 2885.676 | 0        | 0.24523  | 0.07615  | 3.220345 | 0.001421 | 0.089001 | 1 |
| ENSG00000145014.13 | TREATTXTPF-00547659 225mg  | Week12 | TMEM44    | protein_coding    | chr3  | 194308402 | 194354418 - | 4561  | 62.94475 | 0.007735 | 0.434246 | 0.134869 | 3.219764 | 0.001424 | 0.089116 | 1 |
| ENSG00000265517.1  | TREATTXTPF-00547659 225mg  | Week12 | AL122127  | miRNA             | chr14 | 106323912 | 106323971 - | 60    | 63.84862 | 0.00884  | 0.53946  | 0.167577 | 3.219174 | 0.001427 | 0.089186 | 1 |
| ENSG00000121940.11 | TREATTXTPF-00547659 225mg  | Week12 | CLCC1     | protein_coding    | chr1  | 109472130 | 109506111 - | 4996  | 725.7359 | 0        | 0.304173 | 0.094496 | 3.218886 | 0.001428 | 0.089186 | 1 |
| ENSG00000151748.10 | TREATTXTPF-00547659 225mg  | Week12 | SAV1      | protein_coding    | chr14 | 51098776  | 51135049 -  | 5630  | 343.1558 | 0.00221  | 0.350497 | 0.108893 | 3.218718 | 0.001429 | 0.089186 | 1 |
| ENSG00000155506.12 | TREATTXTPF-00547659 225mg  | Week12 | LARP1     | protein_coding    | chr5  | 154092462 | 154197167 + | 8492  | 5201.125 | 0        | 0.26959  | 0.083762 | 3.218531 | 0.00143  | 0.089186 | 1 |
| ENSG00000111641.6  | TREATTXTPF-00547659 75mg   | Week12 | NOP2      | protein_coding    | chr12 | 6666029   | 6677857 -   | 4687  | 1654.875 | 0        | 0.242091 | 0.075221 | 3.218385 | 0.00143  | 0.089186 | 1 |
| ENSG00000167034.9  | TREATTXTPF-00547659 22.5mg | Week12 | NKX3-1    | protein_coding    | chr8  | 23536206  | 23540440 -  | 3271  | 228.505  | 0.00442  | 0.489215 | 0.152009 | 3.218323 | 0.001431 | 0.089186 | 1 |
| ENSG00000224975.1  | TREATTXTPF-00547659 225mg  | Week12 | INE1      | sense_intronic    | chrX  | 47064320  | 47065264 +  | 945   | 98.1337  | 0.007735 | 0.485514 | 0.150871 | 3.218069 | 0.001432 | 0.089186 | 1 |
| ENSG00000126705.9  | TREATTXTPF-00547659 225mg  | Week12 | AHDC1     | protein_coding    | chr1  | 27860546  | 27930942 -  | 7157  | 523.8917 | 0        | 0.324962 | 0.100984 | 3.217942 | 0.001432 | 0.089186 | 1 |
| ENSG00000248592.3  | TREATTXTPF-00547659 225mg  | Week12 | TMEM110   | protein_coding    | chr3  | 52867137  | 52931578 -  | 6271  | 75.3116  | 0.005525 | 0.342292 | 0.106378 | 3.217691 | 0.001434 | 0.089186 | 1 |
| ENSG00000260979.1  | TREATTXTPF-00547659 225mg  | Week12 | RP11-77H  | lincRNA           | chr16 | 9056563   | 9060847 +   | 427   | 85.95249 | 0.003315 | -0.5481  | 0.170345 | -3.21758 | 0.001434 | 0.089186 | 1 |
| ENSG00000198453.8  | TREATTXTPF-00547659 225mg  | Week12 | ZNF568    | protein_coding    | chr19 | 37407231  | 37489602 +  | 9322  | 169.9249 | 0.001105 | 0.445564 | 0.138498 | 3.217118 | 0.001436 | 0.089236 | 1 |
| ENSG0000015520.10  | TREATTXTPF-00547659 22.5mg | Week12 | NPC1L1    | protein_coding    | chr7  | 44552134  | 44580914 -  | 5252  | 3.343646 | 0.369061 | 0.460517 | 0.143166 | 3.216664 | 0.001439 | 0.089236 | 1 |
| ENSG00000185361.4  | TREATTXTPF-00547659 225mg  | Week12 | TNFAIP8L1 | protein_coding    | chr19 | 4639530   | 4659580 +   | 6667  | 822.9956 | 0        | 0.277016 | 0.086124 | 3.216486 | 0.001439 | 0.089236 | 1 |
| ENSG00000118058.16 | TREATTXTPF-00547659 225mg  | Week12 | KMT2A     | protein_coding    | chr11 | 118307205 | 118397539 + | 21953 | 3542.092 | 0        | 0.342535 | 0.106494 | 3.216485 | 0.00144  | 0.089236 | 1 |
| ENSG00000116198.8  | TREATTXTPF-00547659 225mg  | Week12 | CEP104    | protein_coding    | chr1  | 3728645   | 3773778 -   | 7876  | 1070.318 | 0        | 0.239747 | 0.07454  | 3.216351 | 0.00144  | 0.089236 | 1 |
| ENSG00000185049.8  | TREATTXTPF-00547659 225mg  | Week12 | NELFA     | protein_coding    | chr4  | 1984441   | 2043630 -   | 5935  | 1267.13  | 0        | 0.237271 | 0.073779 | 3.215963 | 0.001442 | 0.089236 | 1 |
| ENSG00000177084.12 | TREATTXTPF-00547659 225mg  | Week12 | POLE      | protein_coding    | chr12 | 133200348 | 133263951 - | 16605 | 1195.629 | 0        | 0.240264 | 0.07471  | 3.215961 | 0.001442 | 0.089236 | 1 |
| ENSG00000149582.11 | TREATTXTPF-00547659 225mg  | Week12 | TMEM25    | protein_coding    | chr11 | 118401756 | 118417995 + | 5529  | 236.5326 | 0.001105 | 0.378701 | 0.11776  | 3.215858 | 0.001443 | 0.089236 | 1 |
| ENSG00000226686.3  | TREATTXTPF-00547659 225mg  | Week12 | AC012309  | lincRNA           | chr19 | 37742814  | 37756437 +  | 2187  | 5.250829 | 0.293923 | 0.536072 | 0.166714 | 3.215512 | 0.001444 | 0.089282 | 1 |
| ENSG00000225541.1  | TREATTXTPF-00547659 225mg  | Week12 | AC002480  | sense_overlapping | chr7  | 22611226  | 22701411 -  | 1282  | 39.34917 | 0.01989  | 0.531122 | 0.165191 | 3.215196 | 0.001446 | 0.089286 | 1 |
| ENSG00000080300.10 | TREATTXTPF-00547659 225mg  | Week12 | CELSR3    | protein_coding    | chr3  | 48673902  | 48700348 -  | 13888 | 165.6354 | 0        | 0.341931 | 0.106351 | 3.215112 | 0.001446 | 0.089286 | 1 |

|                    |                            |        |           |                |       |           |             |       |          |          |          |          |          |          |          |   |
|--------------------|----------------------------|--------|-----------|----------------|-------|-----------|-------------|-------|----------|----------|----------|----------|----------|----------|----------|---|
| ENSG00000164845.12 | TREATTXTPF-00547659 225mg  | Week12 | FAM86FP   | pseudogene     | chr12 | 8385108   | 8395544 -   | 994   | 41.23536 | 0.014365 | 0.44991  | 0.13996  | 3.214563 | 0.001449 | 0.089328 | 1 |
| ENSG00000149930.13 | TREATTXTPF-00547659 225mg  | Week12 | TAOK2     | protein_coding | chr16 | 29984962  | 30003582 +  | 9058  | 2867.734 | 0        | 0.148986 | 0.046348 | 3.214491 | 0.001449 | 0.089328 | 1 |
| ENSG00000137656.7  | TREATTXTPF-00547659 225mg  | Week12 | BUD13     | protein_coding | chr11 | 116618886 | 116643704 - | 2196  | 1144.03  | 0        | 0.164107 | 0.051056 | 3.214273 | 0.00145  | 0.089328 | 1 |
| ENSG00000170456.10 | TREATTXTPF-00547659 225mg  | Week12 | DENND5B   | protein_coding | chr12 | 31535157  | 31744031 -  | 11310 | 189.9989 | 0.00221  | 0.47798  | 0.148741 | 3.213501 | 0.001454 | 0.089328 | 1 |
| ENSG00000083844.6  | TREATTXTPF-00547659 225mg  | Week12 | ZNF264    | protein_coding | chr19 | 57702868  | 57724724 +  | 3042  | 304.2917 | 0        | 0.238604 | 0.074251 | 3.21347  | 0.001454 | 0.089328 | 1 |
| ENSG00000177606.5  | TREATTXTPF-00547659 75mg   | Week12 | JUN       | protein_coding | chr1  | 59246465  | 59249785 -  | 3321  | 486.053  | 0        | 0.292934 | 0.091161 | 3.213379 | 0.001455 | 0.089328 | 1 |
| ENSG00000243452.3  | TREATTXTPF-00547659 225mg  | Week12 | NBPF15    | protein_coding | chr1  | 148555979 | 148596267 + | 5306  | 703.842  | 0        | 0.411619 | 0.128101 | 3.213248 | 0.001455 | 0.089328 | 1 |
| ENSG00000065717.10 | TREATTXTPF-00547659 225mg  | Week12 | TLE2      | protein_coding | chr19 | 2997636   | 3047633 -   | 4038  | 312.6486 | 0        | 0.423056 | 0.131662 | 3.213186 | 0.001456 | 0.089328 | 1 |
| ENSG00000263463.1  | TREATTXTPF-00547659 225mg  | Week12 | MIR3781   | miRNA          | chr22 | 42319226  | 42319301 -  | 76    | 82.95138 | 0.007735 | 0.503379 | 0.156665 | 3.213095 | 0.001456 | 0.089328 | 1 |
| ENSG00000221829.5  | TREATTXTPF-00547659 225mg  | Week12 | FANCG     | protein_coding | chr9  | 35073832  | 35080013 -  | 3614  | 373.9403 | 0        | 0.246194 | 0.076626 | 3.212927 | 0.001457 | 0.089328 | 1 |
| ENSG00000140577.11 | TREATTXTPF-00547659 225mg  | Week12 | CRTC3     | protein_coding | chr15 | 91073157  | 91188577 +  | 10814 | 3117.364 | 0        | 0.265774 | 0.08273  | 3.212529 | 0.001459 | 0.089328 | 1 |
| ENSG00000145555.10 | TREATTXTPF-00547659 75mg   | Week12 | MYO10     | protein_coding | chr5  | 16665395  | 16936372 -  | 10537 | 100.3138 | 0.00442  | -0.5121  | 0.159408 | -3.21251 | 0.001459 | 0.089328 | 1 |
| ENSG00000108592.12 | TREATTXTPF-00547659 225mg  | Week12 | FTSJ3     | protein_coding | chr17 | 61896793  | 61907372 -  | 5212  | 1715.766 | 0        | 0.220368 | 0.068598 | 3.212467 | 0.001459 | 0.089328 | 1 |
| ENSG00000105088.4  | TREATTXTPF-00547659 75mg   | Week12 | OLFAM2    | protein_coding | chr19 | 9964394   | 10047228 -  | 2500  | 470.3657 | 0        | 0.295722 | 0.092065 | 3.212119 | 0.001461 | 0.089328 | 1 |
| ENSG00000078589.8  | TREATTXTPF-00547659 225mg  | Week12 | P2RY10    | protein_coding | chrX  | 78200829  | 78217451 +  | 1803  | 840.0398 | 0        | 0.420744 | 0.130988 | 3.212083 | 0.001461 | 0.089328 | 1 |
| ENSG00000042445.9  | TREATTXTPF-00547659 225mg  | Week12 | RETSAT    | protein_coding | chr2  | 85569211  | 85581743 -  | 4264  | 1053.683 | 0        | 0.188143 | 0.05858  | 3.211722 | 0.001463 | 0.089357 | 1 |
| ENSG00000101945.12 | TREATTXTPF-00547659 225mg  | Week12 | SUV39H1   | protein_coding | chrX  | 48553945  | 48567403 +  | 3368  | 527.6354 | 0        | 0.214787 | 0.066878 | 3.211603 | 0.001463 | 0.089357 | 1 |
| ENSG00000135423.8  | TREATTXTPF-00547659 225mg  | Week12 | GLS2      | protein_coding | chr12 | 56864736  | 56882198 -  | 4062  | 68.84088 | 0.007735 | 0.47857  | 0.149047 | 3.210877 | 0.001467 | 0.089407 | 1 |
| ENSG00000131778.13 | TREATTXTPF-00547659 225mg  | Week12 | CHD1L     | protein_coding | chr1  | 146714291 | 146767443 + | 3370  | 1320.456 | 0        | 0.251649 | 0.078374 | 3.210874 | 0.001467 | 0.089407 | 1 |
| ENSG00000136193.12 | TREATTXTPF-00547659 225mg  | Week12 | SCRN1     | protein_coding | chr7  | 29959719  | 30029905 -  | 6046  | 1093.007 | 0        | 0.31735  | 0.098838 | 3.210801 | 0.001467 | 0.089407 | 1 |
| ENSG00000214548.10 | TREATTXTPF-00547659 225mg  | Week12 | MEG3      | lincRNA        | chr14 | 101245747 | 101327368 + | 15769 | 93.31934 | 0.055249 | 0.782559 | 0.243749 | 3.210508 | 0.001469 | 0.089407 | 1 |
| ENSG00000128191.9  | TREATTXTPF-00547659 225mg  | Week12 | DGCR8     | protein_coding | chr22 | 20067755  | 20099400 +  | 7315  | 1385.524 | 0        | 0.237155 | 0.073869 | 3.210483 | 0.001469 | 0.089407 | 1 |
| ENSG00000005156.7  | TREATTXTPF-00547659 225mg  | Week12 | LIG3      | protein_coding | chr17 | 33307513  | 33332083 +  | 8240  | 695.7547 | 0        | 0.257412 | 0.080211 | 3.209186 | 0.001475 | 0.089632 | 1 |
| ENSG00000186174.8  | TREATTXTPF-00547659 225mg  | Week12 | BCL9L     | protein_coding | chr11 | 118764584 | 118796317 - | 10495 | 5885.313 | 0        | 0.348067 | 0.10846  | 3.20918  | 0.001475 | 0.089632 | 1 |
| ENSG00000132604.6  | TREATTXTPF-00547659 75mg   | Week12 | TERF2     | protein_coding | chr16 | 69389464  | 69442474 -  | 5621  | 1552.144 | 0        | 0.182261 | 0.056794 | 3.209164 | 0.001475 | 0.089632 | 1 |
| ENSG00000187116.9  | TREATTXTPF-00547659 75mg   | Week12 | LILRA5    | protein_coding | chr19 | 54818353  | 54824409 -  | 1762  | 16050.98 | 0        | -0.35514 | 0.110675 | -3.20882 | 0.001477 | 0.089667 | 1 |
| ENSG00000127804.8  | TREATTXTPF-00547659 225mg  | Week12 | METTL16   | protein_coding | chr17 | 2308856   | 2415185 -   | 8934  | 1061.677 | 0        | 0.279303 | 0.087047 | 3.208666 | 0.001478 | 0.089667 | 1 |
| ENSG00000229106.1  | TREATTXTPF-00547659 225mg  | Week12 | RP11-4M2  | pseudogene     | chr1  | 24227961  | 24229227 -  | 1267  | 26.16796 | 0.030939 | 0.514873 | 0.160491 | 3.208105 | 0.001481 | 0.089757 | 1 |
| ENSG00000141560.10 | TREATTXTPF-00547659 225mg  | Week12 | FN3KRP    | protein_coding | chr17 | 80674559  | 80688204 +  | 2971  | 870.4983 | 0        | 0.267637 | 0.083431 | 3.207877 | 0.001482 | 0.089757 | 1 |
| ENSG00000187554.7  | TREATTXTPF-00547659 225mg  | Week12 | TLR5      | protein_coding | chr1  | 223282748 | 223316624 - | 4651  | 3011.295 | 0        | -0.38994 | 0.121568 | -3.20756 | 0.001483 | 0.089757 | 1 |
| ENSG00000162777.12 | TREATTXTPF-00547659 75mg   | Week12 | DENND2D   | protein_coding | chr1  | 111729796 | 111747157 - | 5515  | 6800.459 | 0        | 0.243323 | 0.075868 | 3.207186 | 0.001485 | 0.089757 | 1 |
| ENSG00000255571.2  | TREATTXTPF-00547659 225mg  | Week12 | LINC00925 | lincRNA        | chr15 | 89904810  | 89939471 +  | 5018  | 74.14586 | 0.00884  | 0.492301 | 0.1535   | 3.207185 | 0.001485 | 0.089757 | 1 |
| ENSG00000211794.3  | TREATTXTPF-00547659 225mg  | Week12 | TRAV12-3  | TR_V_gene      | chr14 | 22433680  | 22434290 +  | 399   | 183.3669 | 0.00221  | 0.404851 | 0.126243 | 3.206927 | 0.001487 | 0.089757 | 1 |
| ENSG00000158859.9  | TREATTXTPF-00547659 75mg   | Week12 | ADAMTS4   | protein_coding | chr1  | 161154098 | 161168846 - | 10334 | 42.65635 | 0.012155 | 0.490529 | 0.152963 | 3.206838 | 0.001487 | 0.089757 | 1 |
| ENSG00000155849.11 | TREATTXTPF-00547659 75mg   | Week12 | ELMO1     | protein_coding | chr7  | 36893961  | 37488852 -  | 9767  | 4912.703 | 0        | 0.171245 | 0.053401 | 3.206758 | 0.001487 | 0.089757 | 1 |
| ENSG00000197102.6  | TREATTXTPF-00547659 225mg  | Week12 | DYNC1H1   | protein_coding | chr14 | 102430865 | 102517129 + | 15826 | 6615.144 | 0        | 0.233691 | 0.072877 | 3.206631 | 0.001488 | 0.089757 | 1 |
| ENSG00000155561.10 | TREATTXTPF-00547659 225mg  | Week12 | NUP205    | protein_coding | chr7  | 135242667 | 135333505 + | 7623  | 1708.636 | 0        | 0.310935 | 0.096977 | 3.206288 | 0.00149  | 0.089757 | 1 |
| ENSG00000144031.7  | TREATTXTPF-00547659 225mg  | Week12 | ANKRD53   | protein_coding | chr2  | 71205510  | 71212626 +  | 2523  | 4.79779  | 0.228729 | 0.474092 | 0.147873 | 3.206078 | 0.001491 | 0.089757 | 1 |
| ENSG00000258947.2  | TREATTXTPF-00547659 75mg   | Week12 | TUBB3     | protein_coding | chr16 | 89987800  | 90005169 +  | 6138  | 1.622099 | 0.654144 | 0.412755 | 0.128748 | 3.205928 | 0.001492 | 0.089757 | 1 |
| ENSG00000035928.10 | TREATTXTPF-00547659 225mg  | Week12 | RFC1      | protein_coding | chr4  | 39289076  | 39367995 -  | 6713  | 1720.817 | 0        | 0.267398 | 0.036644 | 3.205668 | 0.001493 | 0.089757 | 1 |
| ENSG00000163257.6  | TREATTXTPF-00547659 225mg  | Week12 | DCAF16    | protein_coding | chr4  | 17802278  | 17812381 -  | 4816  | 925.9215 | 0        | 0.361879 | 0.11289  | 3.205577 | 0.001493 | 0.089757 | 1 |
| ENSG00000177732.6  | TREATTXTPF-00547659 225mg  | Week12 | SOX12     | protein_coding | chr20 | 306207    | 310865 +    | 4659  | 432.7536 | 0        | 0.29992  | 0.093564 | 3.205523 | 0.001494 | 0.089757 | 1 |
| ENSG00000227200.1  | TREATTXTPF-00547659 22.5mg | Week12 | RP11-1211 | sense_intronic | chr9  | 127025155 | 127028088 + | 373   | 2.567956 | 0.478453 | -0.41767 | 0.130311 | -3.20521 | 0.001495 | 0.089796 | 1 |
| ENSG00000091542.8  | TREATTXTPF-00547659 75mg   | Week12 | ALKBH5    | protein_coding | chr17 | 18086392  | 18113268 +  | 3190  | 4850.907 | 0        | 0.166855 | 0.052066 | 3.204699 | 0.001498 | 0.089892 | 1 |
| ENSG00000254420.1  | TREATTXTPF-00547659 225mg  | Week12 | RP11-452f | antisense      | chr11 | 78035804  | 78155095 +  | 437   | 4.620994 | 0.488398 | -0.56857 | 0.177435 | -3.20436 | 0.001499 | 0.089903 | 1 |
| ENSG00000078687.12 | TREATTXTPF-00547659 225mg  | Week12 | TNRC6C    | protein_coding | chr17 | 76000249  | 76104916 +  | 11058 | 1099.758 | 0        | 0.315828 | 0.098581 | 3.203738 | 0.001503 | 0.089903 | 1 |
| ENSG00000071051.9  | TREATTXTPF-00547659 75mg   | Week12 | NCK2      | protein_coding | chr2  | 106361354 | 106510730 + | 2990  | 2998.954 | 0        | 0.179249 | 0.055952 | 3.20362  | 0.001503 | 0.089903 | 1 |
| ENSG00000110048.7  | TREATTXTPF-00547659 225mg  | Week12 | OSBP      | protein_coding | chr11 | 59341871  | 59383617 -  | 5492  | 2396.409 | 0        | 0.221488 | 0.06914  | 3.203451 | 0.001504 | 0.089903 | 1 |
| ENSG00000054965.6  | TREATTXTPF-00547659 225mg  | Week12 | FAM168A   | protein_coding | chr11 | 73111532  | 73309234 -  | 7823  | 2224.03  | 0        | 0.202469 | 0.063207 | 3.20329  | 0.001505 | 0.089903 | 1 |
| ENSG00000170631.10 | TREATTXTPF-00547659 225mg  | Week12 | ZNF16     | protein_coding | chr8  | 146155744 | 146176274 - | 5237  | 221.1061 | 0        | 0.288838 | 0.090172 | 3.2032   | 0.001505 | 0.089903 | 1 |
| ENSG00000059573.4  | TREATTXTPF-00547659 225mg  | Week12 | ALDH18A1  | protein_coding | chr10 | 97365696  | 97416463 -  | 3756  | 917.7967 | 0        | 0.2949   | 0.09207  | 3.203001 | 0.001506 | 0.089903 | 1 |
| ENSG00000103522.11 | TREATTXTPF-00547659 225mg  | Week12 | IL21R     | protein_coding | chr16 | 27413483  | 27462115 +  | 4219  | 1234.406 | 0        | 0.331897 | 0.103625 | 3.202852 | 0.001507 | 0.089903 | 1 |
| ENSG00000230530.1  | TREATTXTPF-00547659 225mg  | Week12 | LIMD1-AS  | antisense      | chr3  | 45720535  | 45730626 -  | 1651  | 45.80884 | 0.009945 | 0.416674 | 0.130095 | 3.202836 | 0.001507 | 0.089903 | 1 |

|                    |                            |        |           |                      |       |           |           |   |       |          |          |          |          |          |          |          |   |
|--------------------|----------------------------|--------|-----------|----------------------|-------|-----------|-----------|---|-------|----------|----------|----------|----------|----------|----------|----------|---|
| ENSG00000079313.7  | TREATTXTPF-00547659 225mg  | Week12 | REXO1     | protein_coding       | chr19 | 1815248   | 1848452   | - | 5186  | 2416.94  | 0        | 0.176473 | 0.0551   | 3.202783 | 0.001507 | 0.089903 | 1 |
| ENSG00000261015.1  | TREATTXTPF-00547659 75mg   | Week12 | RP1-90J20 | sense_overlapping    | chr6  | 3025025   | 3027659   | + | 2635  | 482.6751 | 0        | -0.28321 | 0.08844  | -3.20233 | 0.00151  | 0.089982 | 1 |
| ENSG00000178732.4  | TREATTXTPF-00547659 225mg  | Week12 | GP5       | protein_coding       | chr3  | 194115550 | 194119995 | - | 3563  | 158.8939 | 0.00442  | 0.495177 | 0.154658 | 3.201758 | 0.001513 | 0.0901   | 1 |
| ENSG00000227777.1  | TREATTXTPF-00547659 22.5mg | Week12 | RP4-738P1 | pseudogene           | chr1  | 168511975 | 168512592 | + | 618   | 1.037569 | 0.751381 | 0.340875 | 0.106472 | 3.201553 | 0.001514 | 0.090105 | 1 |
| ENSG00000175782.8  | TREATTXTPF-00547659 225mg  | Week12 | SLC35E3   | protein_coding       | chr12 | 69139886  | 69187508  | + | 5612  | 540.6972 | 0        | 0.249682 | 0.078002 | 3.200963 | 0.001517 | 0.090191 | 1 |
| ENSG00000125084.7  | TREATTXTPF-00547659 75mg   | Week12 | WNT1      | protein_coding       | chr12 | 49372398  | 49375459  | + | 1185  | 18.53591 | 0.025414 | 0.486442 | 0.151981 | 3.200667 | 0.001518 | 0.090191 | 1 |
| ENSG00000140743.3  | TREATTXTPF-00547659 225mg  | Week12 | CDR2      | protein_coding       | chr16 | 22357257  | 22448486  | - | 3948  | 1284.038 | 0        | 0.330402 | 0.10323  | 3.200652 | 0.001518 | 0.090191 | 1 |
| ENSG00000136720.6  | TREATTXTPF-00547659 225mg  | Week12 | HS6ST1    | protein_coding       | chr2  | 128994290 | 129076151 | - | 4683  | 772.0144 | 0        | 0.216731 | 0.067719 | 3.200433 | 0.001519 | 0.090191 | 1 |
| ENSG00000110917.3  | TREATTXTPF-00547659 225mg  | Week12 | MLEC      | protein_coding       | chr12 | 121124672 | 121139667 | + | 6723  | 4692.785 | 0        | 0.223165 | 0.069732 | 3.200335 | 0.00152  | 0.090191 | 1 |
| ENSG00000082014.12 | TREATTXTPF-00547659 22.5mg | Week12 | SMARCD3   | protein_coding       | chr7  | 150935850 | 150974982 | - | 5198  | 2218.819 | 0        | -0.20942 | 0.065443 | -3.20002 | 0.001521 | 0.090221 | 1 |
| ENSG00000230289.1  | TREATTXTPF-00547659 75mg   | Week12 | RP11-334J | antisense            | chr9  | 134391945 | 134397616 | - | 473   | 4.876243 | 0.234254 | 0.478881 | 0.149657 | 3.199864 | 0.001522 | 0.090221 | 1 |
| ENSG00000273066.1  | TREATTXTPF-00547659 225mg  | Week12 | RP11-216L | processed_transcript | chr9  | 139693675 | 139704494 | + | 4335  | 24.23757 | 0.018785 | 0.450209 | 0.140723 | 3.199253 | 0.001525 | 0.090317 | 1 |
| ENSG00000182446.9  | TREATTXTPF-00547659 225mg  | Week12 | NPLOC4    | protein_coding       | chr17 | 79523913  | 79615495  | + | 9562  | 5868.245 | 0        | 0.131032 | 0.040962 | 3.198897 | 0.001527 | 0.090317 | 1 |
| ENSG00000155666.7  | TREATTXTPF-00547659 225mg  | Week12 | KDM8      | protein_coding       | chr16 | 27214807  | 27233089  | + | 4048  | 770.1215 | 0.001105 | 0.288489 | 0.09019  | 3.198667 | 0.001528 | 0.090317 | 1 |
| ENSG00000246627.2  | TREATTXTPF-00547659 225mg  | Week12 | CACNA1C   | antisense            | chr12 | 2785167   | 2800366   | - | 2639  | 71.4453  | 0.00442  | 0.4659   | 0.145656 | 3.198638 | 0.001528 | 0.090317 | 1 |
| ENSG00000027075.9  | TREATTXTPF-00547659 225mg  | Week12 | PRKCH     | protein_coding       | chr14 | 61654277  | 62017694  | + | 8809  | 4772.148 | 0        | 0.335877 | 0.105015 | 3.198376 | 0.00153  | 0.090317 | 1 |
| ENSG00000221890.2  | TREATTXTPF-00547659 225mg  | Week12 | NPTXR     | protein_coding       | chr22 | 39214457  | 39239987  | - | 5784  | 310.4586 | 0        | 0.386781 | 0.120941 | 3.198089 | 0.001531 | 0.090317 | 1 |
| ENSG00000160654.5  | TREATTXTPF-00547659 225mg  | Week12 | CD3G      | protein_coding       | chr11 | 118215059 | 118225876 | + | 3836  | 3032.376 | 0        | 0.378724 | 0.118426 | 3.19799  | 0.001532 | 0.090317 | 1 |
| ENSG00000266631.1  | TREATTXTPF-00547659 225mg  | Week12 | AC006116  | miRNA                | chr19 | 56907685  | 56907770  | - | 86    | 4.209945 | 0.278453 | 0.46861  | 0.146535 | 3.197944 | 0.001532 | 0.090317 | 1 |
| ENSG00000104824.12 | TREATTXTPF-00547659 225mg  | Week12 | HNRNPL    | protein_coding       | chr19 | 39327028  | 39342987  | - | 6821  | 6937.294 | 0        | 0.150813 | 0.04716  | 3.197873 | 0.001532 | 0.090317 | 1 |
| ENSG00000165272.10 | TREATTXTPF-00547659 75mg   | Week12 | AQP3      | protein_coding       | chr9  | 33441152  | 33447609  | - | 2928  | 2663.088 | 0        | 0.33851  | 0.105862 | 3.197655 | 0.001534 | 0.090327 | 1 |
| ENSG00000071575.7  | TREATTXTPF-00547659 225mg  | Week12 | TRIB2     | protein_coding       | chr2  | 12857015  | 12882860  | + | 4588  | 2517.432 | 0        | 0.377083 | 0.117951 | 3.196954 | 0.001537 | 0.090447 | 1 |
| ENSG00000230131.1  | TREATTXTPF-00547659 225mg  | Week12 | RP11-282I | lincRNA              | chr10 | 125115966 | 125277224 | + | 1245  | 2.216575 | 0.519337 | 0.434507 | 0.135915 | 3.196888 | 0.001537 | 0.090447 | 1 |
| ENSG00000183647.6  | TREATTXTPF-00547659 225mg  | Week12 | ZNF530    | protein_coding       | chr19 | 58111253  | 58124090  | + | 5019  | 171.2166 | 0.001105 | 0.366258 | 0.114577 | 3.196599 | 0.001539 | 0.090478 | 1 |
| ENSG00000152117.13 | TREATTXTPF-00547659 225mg  | Week12 | AC093838  | pseudogene           | chr2  | 132250386 | 132279146 | + | 4249  | 931.2022 | 0        | 0.286314 | 0.089581 | 3.196161 | 0.001541 | 0.090555 | 1 |
| ENSG00000115306.11 | TREATTXTPF-00547659 225mg  | Week12 | SPTBN1    | protein_coding       | chr2  | 54683422  | 54896812  | + | 16722 | 3819.083 | 0        | 0.324647 | 0.101599 | 3.195366 | 0.001545 | 0.090718 | 1 |
| ENSG00000065150.14 | TREATTXTPF-00547659 225mg  | Week12 | IPO5      | protein_coding       | chr13 | 98605912  | 98676551  | + | 9671  | 2637.377 | 0        | 0.281102 | 0.087978 | 3.19515  | 0.001546 | 0.090718 | 1 |
| ENSG00000180739.12 | TREATTXTPF-00547659 75mg   | Week12 | S1PR5     | protein_coding       | chr19 | 10623623  | 10628607  | - | 2601  | 1683.594 | 0        | 0.418841 | 0.13109  | 3.195071 | 0.001547 | 0.090718 | 1 |
| ENSG00000188042.5  | TREATTXTPF-00547659 225mg  | Week12 | ARL4C     | protein_coding       | chr2  | 235401685 | 235405697 | - | 4013  | 6705.014 | 0        | 0.309093 | 0.096756 | 3.19458  | 0.001549 | 0.090811 | 1 |
| ENSG00000235437.3  | TREATTXTPF-00547659 225mg  | Week12 | RP11-357J | processed_transcript | chrX  | 62563106  | 62780951  | - | 6379  | 845.0354 | 0        | 0.363518 | 0.113802 | 3.194305 | 0.001551 | 0.090838 | 1 |
| ENSG00000160883.6  | TREATTXTPF-00547659 75mg   | Week12 | HK3       | protein_coding       | chr5  | 176307870 | 176326333 | - | 3290  | 15929.71 | 0        | -0.32339 | 0.101285 | -3.19283 | 0.001558 | 0.09113  | 1 |
| ENSG00000125648.10 | TREATTXTPF-00547659 225mg  | Week12 | SLC25A23  | protein_coding       | chr19 | 6436090   | 6465214   | - | 4859  | 699.3834 | 0        | 0.337515 | 0.105715 | 3.192703 | 0.001559 | 0.09113  | 1 |
| ENSG00000149970.10 | TREATTXTPF-00547659 225mg  | Week12 | CNKSR2    | protein_coding       | chrX  | 21392536  | 21672813  | + | 7160  | 78.36022 | 0.00663  | 0.528668 | 0.165598 | 3.192488 | 0.00156  | 0.09113  | 1 |
| ENSG00000167555.9  | TREATTXTPF-00547659 225mg  | Week12 | ZNF528    | protein_coding       | chr19 | 52901102  | 52921665  | + | 8530  | 390.1812 | 0        | 0.402725 | 0.126149 | 3.192455 | 0.00156  | 0.09113  | 1 |
| ENSG00000064703.7  | TREATTXTPF-00547659 225mg  | Week12 | DDX20     | protein_coding       | chr1  | 112297867 | 112310638 | + | 6019  | 832.6851 | 0        | 0.277394 | 0.086891 | 3.192426 | 0.001561 | 0.09113  | 1 |
| ENSG00000148842.13 | TREATTXTPF-00547659 225mg  | Week12 | CNNM2     | protein_coding       | chr10 | 104678050 | 104849978 | + | 16324 | 293.4884 | 0        | 0.261653 | 0.08197  | 3.192061 | 0.001563 | 0.091154 | 1 |
| ENSG00000170486.6  | TREATTXTPF-00547659 75mg   | Week12 | KRT72     | protein_coding       | chr12 | 52979373  | 52995322  | - | 2154  | 240.8177 | 0.00442  | 0.491792 | 0.154077 | 3.19185  | 0.001564 | 0.091154 | 1 |
| ENSG00000197857.9  | TREATTXTPF-00547659 225mg  | Week12 | ZNF44     | protein_coding       | chr19 | 12335501  | 12405702  | + | 6460  | 904.9105 | 0        | 0.254463 | 0.079735 | 3.191353 | 0.001566 | 0.091154 | 1 |
| ENSG00000125846.11 | TREATTXTPF-00547659 225mg  | Week12 | ZNF133    | protein_coding       | chr20 | 18269121  | 18297640  | + | 5029  | 475.4166 | 0        | 0.274417 | 0.085989 | 3.19132  | 0.001566 | 0.091154 | 1 |
| ENSG00000240237.1  | TREATTXTPF-00547659 75mg   | Week12 | CTD-2182I | pseudogene           | chr8  | 134014850 | 134015320 | - | 471   | 1.026519 | 0.767956 | -0.33586 | 0.105252 | -3.19102 | 0.001568 | 0.091154 | 1 |
| ENSG00000112365.4  | TREATTXTPF-00547659 225mg  | Week12 | ZBTB24    | protein_coding       | chr6  | 109783797 | 109804440 | - | 5519  | 766.1978 | 0        | 0.288926 | 0.090544 | 3.190996 | 0.001568 | 0.091154 | 1 |
| ENSG00000159131.12 | TREATTXTPF-00547659 225mg  | Week12 | GART      | protein_coding       | chr21 | 34876238  | 34915797  | - | 7804  | 1628.061 | 0        | 0.252109 | 0.079007 | 3.190955 | 0.001568 | 0.091154 | 1 |
| ENSG00000245680.5  | TREATTXTPF-00547659 225mg  | Week12 | ZNF585B   | protein_coding       | chr19 | 37672481  | 37709055  | - | 7538  | 487.7017 | 0        | 0.358209 | 0.11226  | 3.190881 | 0.001569 | 0.091154 | 1 |
| ENSG00000211734.3  | TREATTXTPF-00547659 225mg  | Week12 | TRBV5-1   | TR_V_gene            | chr7  | 142020496 | 142021363 | + | 652   | 482.1061 | 0        | 0.391367 | 0.122706 | 3.189466 | 0.001576 | 0.09148  | 1 |
| ENSG00000204590.8  | TREATTXTPF-00547659 225mg  | Week12 | GNL1      | protein_coding       | chr6  | 30509154  | 30524951  | - | 8646  | 1700.819 | 0        | 0.223201 | 0.069983 | 3.189365 | 0.001577 | 0.09148  | 1 |
| ENSG00000183054.7  | TREATTXTPF-00547659 225mg  | Week12 | RGPD6     | protein_coding       | chr2  | 111271389 | 111334762 | - | 13309 | 3.731492 | 0.373481 | 0.511194 | 0.160286 | 3.189264 | 0.001577 | 0.09148  | 1 |
| ENSG00000106290.10 | TREATTXTPF-00547659 75mg   | Week12 | TAF6      | protein_coding       | chr7  | 99704693  | 99717464  | - | 4086  | 1956.587 | 0        | 0.205091 | 0.06433  | 3.188098 | 0.001583 | 0.091654 | 1 |
| ENSG00000130612.10 | TREATTXTPF-00547659 225mg  | Week12 | CYP2G1P   | pseudogene           | chr19 | 41396731  | 41406413  | + | 2511  | 1.00884  | 0.748066 | 0.325591 | 0.102128 | 3.188072 | 0.001584 | 0.091654 | 1 |
| ENSG00000110583.8  | TREATTXTPF-00547659 225mg  | Week12 | NAA40     | protein_coding       | chr11 | 63706431  | 63724800  | + | 5321  | 905.5094 | 0        | 0.320151 | 0.100426 | 3.187926 | 0.001584 | 0.091654 | 1 |
| ENSG00000122687.13 | TREATTXTPF-00547659 225mg  | Week12 | FTSJ2     | protein_coding       | chr7  | 2273866   | 2281840   | - | 2842  | 900.3646 | 0        | 0.23225  | 0.07286  | 3.187635 | 0.001586 | 0.091654 | 1 |
| ENSG00000011132.7  | TREATTXTPF-00547659 75mg   | Week12 | APBA3     | protein_coding       | chr19 | 3750817   | 3761697   | - | 5556  | 1375.407 | 0        | 0.199429 | 0.062565 | 3.187533 | 0.001586 | 0.091654 | 1 |
| ENSG00000197136.4  | TREATTXTPF-00547659 225mg  | Week12 | PCNXL3    | protein_coding       | chr11 | 65383244  | 65404910  | + | 7972  | 3515.716 | 0        | 0.180955 | 0.05677  | 3.187479 | 0.001587 | 0.091654 | 1 |
| ENSG00000112511.13 | TREATTXTPF-00547659 225mg  | Week12 | PHF1      | protein_coding       | chr6  | 33378176  | 33384230  | + | 3596  | 3493.235 | 0        | 0.204633 | 0.064201 | 3.187383 | 0.001587 | 0.091654 | 1 |

|                    |                            |        |           |                |       |           |             |       |          |          |          |          |          |          |          |   |
|--------------------|----------------------------|--------|-----------|----------------|-------|-----------|-------------|-------|----------|----------|----------|----------|----------|----------|----------|---|
| ENSG00000103044.6  | TREATTXTPF-00547659 225mg  | Week12 | HAS3      | protein_coding | chr16 | 69139467  | 69152622 +  | 5289  | 65.70497 | 0.007735 | 0.404869 | 0.127047 | 3.186773 | 0.00159  | 0.091654 | 1 |
| ENSG00000198851.5  | TREATTXTPF-00547659 225mg  | Week12 | CD3E      | protein_coding | chr11 | 118175260 | 118186890 + | 2844  | 17226.31 | 0        | 0.320345 | 0.100535 | 3.186389 | 0.001592 | 0.091654 | 1 |
| ENSG00000142178.7  | TREATTXTPF-00547659 225mg  | Week12 | SIK1      | protein_coding | chr21 | 44834395  | 44847008 -  | 4886  | 342.1271 | 0.001105 | 0.393848 | 0.123608 | 3.186276 | 0.001593 | 0.091654 | 1 |
| ENSG00000105136.15 | TREATTXTPF-00547659 225mg  | Week12 | ZNF419    | protein_coding | chr19 | 57999079  | 58006048 +  | 6591  | 367.1304 | 0        | 0.333936 | 0.10481  | 3.18612  | 0.001594 | 0.091654 | 1 |
| ENSG00000227370.1  | TREATTXTPF-00547659 22.5mg | Week12 | RP4-669P1 | pseudogene     | chr22 | 42528550  | 42529005 +  | 456   | 7.109392 | 0.158011 | 0.479739 | 0.150577 | 3.18601  | 0.001594 | 0.091654 | 1 |
| ENSG0000027075.9   | TREATTXTPF-00547659 75mg   | Week12 | PRKCH     | protein_coding | chr14 | 61654277  | 62017694 +  | 8809  | 4772.148 | 0        | 0.326118 | 0.102363 | 3.185902 | 0.001595 | 0.091654 | 1 |
| ENSG00000107611.10 | TREATTXTPF-00547659 225mg  | Week12 | CUBN      | protein_coding | chr10 | 16865963  | 17171830 -  | 13168 | 256.1569 | 0.00221  | 0.443144 | 0.139101 | 3.185777 | 0.001596 | 0.091654 | 1 |
| ENSG00000185761.6  | TREATTXTPF-00547659 225mg  | Week12 | ADAMTSL1  | protein_coding | chr19 | 1505017   | 1513603 -   | 3867  | 92.07072 | 0.00221  | 0.453487 | 0.142353 | 3.185647 | 0.001596 | 0.091654 | 1 |
| ENSG00000078808.12 | TREATTXTPF-00547659 75mg   | Week12 | SDF4      | protein_coding | chr1  | 1152288   | 1167411 -   | 4709  | 6302.075 | 0        | 0.147678 | 0.046364 | 3.18521  | 0.001599 | 0.091654 | 1 |
| ENSG00000106351.8  | TREATTXTPF-00547659 75mg   | Week12 | AGFG2     | protein_coding | chr7  | 100136834 | 100165842 + | 5478  | 1003.115 | 0        | 0.306199 | 0.096133 | 3.185149 | 0.001599 | 0.091654 | 1 |
| ENSG00000239306.4  | TREATTXTPF-00547659 225mg  | Week12 | RBM14     | protein_coding | chr11 | 66384053  | 66394818 +  | 3937  | 2864.909 | 0        | 0.187038 | 0.058728 | 3.184821 | 0.001601 | 0.091654 | 1 |
| ENSG00000085872.10 | TREATTXTPF-00547659 225mg  | Week12 | CHERP     | protein_coding | chr19 | 16628700  | 16653341 -  | 6113  | 2572.466 | 0        | 0.20418  | 0.064112 | 3.184744 | 0.001601 | 0.091654 | 1 |
| ENSG00000153283.8  | TREATTXTPF-00547659 225mg  | Week12 | CD96      | protein_coding | chr3  | 111011566 | 111384597 + | 5762  | 3340.061 | 0        | 0.321997 | 0.101108 | 3.184667 | 0.001602 | 0.091654 | 1 |
| ENSG00000207631.1  | TREATTXTPF-00547659 225mg  | Week12 | MIR641    | miRNA          | chr19 | 40788450  | 40788548 -  | 99    | 1.875138 | 0.58453  | 0.404641 | 0.127066 | 3.184498 | 0.001603 | 0.091654 | 1 |
| ENSG00000182473.16 | TREATTXTPF-00547659 225mg  | Week12 | EXO7      | protein_coding | chr17 | 74077087  | 74171657 -  | 10126 | 6437.496 | 0        | 0.120959 | 0.037984 | 3.184478 | 0.001603 | 0.091654 | 1 |
| ENSG00000267309.1  | TREATTXTPF-00547659 225mg  | Week12 | CTD-2630f | antisense      | chr19 | 36980551  | 36981942 +  | 1392  | 36.70166 | 0.00884  | 0.461977 | 0.145083 | 3.184219 | 0.001604 | 0.091654 | 1 |
| ENSG00000033122.14 | TREATTXTPF-00547659 7.5mg  | Week12 | LRRC7     | protein_coding | chr1  | 70034081  | 70617628 +  | 14652 | 11.56906 | 0.246409 | 0.660909 | 0.207565 | 3.184109 | 0.001605 | 0.091654 | 1 |
| ENSG00000111667.9  | TREATTXTPF-00547659 225mg  | Week12 | USP5      | protein_coding | chr12 | 6961292   | 6975796 +   | 3738  | 2357.081 | 0        | 0.250974 | 0.078823 | 3.184024 | 0.001605 | 0.091654 | 1 |
| ENSG00000106370.10 | TREATTXTPF-00547659 22.5mg | Week12 | PCOLCE2   | protein_coding | chr3  | 142534764 | 142608045 - | 3480  | 23.33481 | 0.128177 | -0.74603 | 0.234321 | -3.1838  | 0.001606 | 0.091654 | 1 |
| ENSG00000166908.13 | TREATTXTPF-00547659 225mg  | Week12 | PIP4K2C   | protein_coding | chr12 | 57984957  | 57997198 +  | 3296  | 1766.939 | 0        | 0.155187 | 0.048743 | 3.183796 | 0.001606 | 0.091654 | 1 |
| ENSG00000196652.7  | TREATTXTPF-00547659 225mg  | Week12 | ZKSCAN5   | protein_coding | chr7  | 99102274  | 99132323 +  | 6056  | 637.1569 | 0        | 0.203684 | 0.063984 | 3.183366 | 0.001609 | 0.09173  | 1 |
| ENSG00000104299.10 | TREATTXTPF-00547659 75mg   | Week12 | INTS9     | protein_coding | chr8  | 28625178  | 28747759 -  | 4905  | 992.3215 | 0        | 0.209426 | 0.0658   | 3.182775 | 0.001612 | 0.091856 | 1 |
| ENSG00000139714.8  | TREATTXTPF-00547659 225mg  | Week12 | MORN3     | protein_coding | chr12 | 122089024 | 122110537 - | 1480  | 88.35028 | 0.005525 | 0.448845 | 0.141038 | 3.182437 | 0.001614 | 0.091866 | 1 |
| ENSG00000135414.5  | TREATTXTPF-00547659 75mg   | Week12 | GDF11     | protein_coding | chr12 | 56137064  | 56150911 +  | 3846  | 304.6243 | 0        | 0.314614 | 0.098861 | 3.182383 | 0.001614 | 0.091866 | 1 |
| ENSG00000197024.4  | TREATTXTPF-00547659 225mg  | Week12 | ZNF398    | protein_coding | chr7  | 148823508 | 148880116 + | 6394  | 1149.011 | 0        | 0.19431  | 0.061068 | 3.181879 | 0.001617 | 0.091966 | 1 |
| ENSG00000132716.14 | TREATTXTPF-00547659 225mg  | Week12 | DCAF8     | protein_coding | chr1  | 160185505 | 160254920 - | 8274  | 3692.375 | 0        | 0.18279  | 0.057451 | 3.181655 | 0.001618 | 0.091979 | 1 |
| ENSG00000197312.7  | TREATTXTPF-00547659 225mg  | Week12 | DDI2      | protein_coding | chr1  | 15943995  | 15995539 +  | 12136 | 1238.501 | 0        | 0.284745 | 0.089515 | 3.180988 | 0.001621 | 0.092126 | 1 |
| ENSG00000103168.12 | TREATTXTPF-00547659 225mg  | Week12 | TAF1C     | protein_coding | chr16 | 84211458  | 84220669 -  | 5565  | 1711.985 | 0        | 0.261135 | 0.082099 | 3.18073  | 0.001623 | 0.092126 | 1 |
| ENSG00000165659.12 | TREATTXTPF-00547659 75mg   | Week12 | DACH1     | protein_coding | chr13 | 72012098  | 72441330 -  | 5395  | 206.7028 | 0.001105 | -0.43801 | 0.137712 | -3.18064 | 0.001623 | 0.092126 | 1 |
| ENSG00000165819.7  | TREATTXTPF-00547659 225mg  | Week12 | METTL3    | protein_coding | chr14 | 21966277  | 21979517 -  | 5654  | 1588.313 | 0        | 0.265647 | 0.083531 | 3.180214 | 0.001626 | 0.092202 | 1 |
| ENSG00000166974.8  | TREATTXTPF-00547659 225mg  | Week12 | MAPRE2    | protein_coding | chr18 | 32556892  | 32723434 +  | 6180  | 3648.049 | 0        | 0.220398 | 0.069314 | 3.179709 | 0.001628 | 0.092256 | 1 |
| ENSG00000147535.12 | TREATTXTPF-00547659 225mg  | Week12 | PPAPDC1E  | protein_coding | chr8  | 38120648  | 38126761 -  | 4414  | 884.2343 | 0        | 0.330994 | 0.104097 | 3.17968  | 0.001629 | 0.092256 | 1 |
| ENSG00000050405.9  | TREATTXTPF-00547659 225mg  | Week12 | LIMA1     | protein_coding | chr12 | 50569571  | 50677329 -  | 6317  | 483.526  | 0        | 0.360943 | 0.113559 | 3.178457 | 0.001635 | 0.092442 | 1 |
| ENSG00000042286.10 | TREATTXTPF-00547659 225mg  | Week12 | AIFM2     | protein_coding | chr10 | 71857979  | 71892690 -  | 5131  | 238.7094 | 0        | 0.327176 | 0.102939 | 3.178339 | 0.001636 | 0.092442 | 1 |
| ENSG00000130584.6  | TREATTXTPF-00547659 7.5mg  | Week12 | ZBTB46    | protein_coding | chr20 | 62375019  | 62462597 -  | 5955  | 97.63204 | 0.003315 | 0.332638 | 0.104664 | 3.178156 | 0.001637 | 0.092442 | 1 |
| ENSG00000198917.7  | TREATTXTPF-00547659 225mg  | Week12 | C9orf114  | protein_coding | chr9  | 131581930 | 131592100 - | 4593  | 1394.183 | 0        | 0.233315 | 0.073414 | 3.178053 | 0.001637 | 0.092442 | 1 |
| ENSG00000167383.4  | TREATTXTPF-00547659 225mg  | Week12 | ZNF229    | protein_coding | chr19 | 44921685  | 44952766 -  | 5508  | 29.18564 | 0.035359 | 0.602254 | 0.189508 | 3.177987 | 0.001638 | 0.092442 | 1 |
| ENSG00000143811.12 | TREATTXTPF-00547659 75mg   | Week12 | PYCR2     | protein_coding | chr1  | 226107578 | 226111978 - | 3539  | 2088.503 | 0        | 0.197458 | 0.062134 | 3.177954 | 0.001638 | 0.092442 | 1 |
| ENSG00000125166.8  | TREATTXTPF-00547659 225mg  | Week12 | GOT2      | protein_coding | chr16 | 58741035  | 58768261 -  | 3766  | 1495.43  | 0        | 0.24233  | 0.07626  | 3.177684 | 0.001639 | 0.092442 | 1 |
| ENSG00000131378.9  | TREATTXTPF-00547659 225mg  | Week12 | RFTN1     | protein_coding | chr23 | 16355081  | 16555533 -  | 4776  | 2348.135 | 0        | 0.276009 | 0.086866 | 3.177423 | 0.001641 | 0.092442 | 1 |
| ENSG00000188322.4  | TREATTXTPF-00547659 75mg   | Week12 | SBK1      | protein_coding | chr16 | 28303840  | 28335170 +  | 4992  | 1484.561 | 0        | 0.347482 | 0.10936  | 3.177413 | 0.001641 | 0.092442 | 1 |
| ENSG00000110497.10 | TREATTXTPF-00547659 75mg   | Week12 | AMBRA1    | protein_coding | chr11 | 46417964  | 46615675 +  | 7673  | 1597.281 | 0        | 0.195984 | 0.061683 | 3.177257 | 0.001642 | 0.092442 | 1 |
| ENSG00000107077.13 | TREATTXTPF-00547659 225mg  | Week12 | KDM4C     | protein_coding | chr9  | 6720863   | 7175648 +   | 10322 | 1518.846 | 0        | 0.276565 | 0.087051 | 3.177059 | 0.001643 | 0.092442 | 1 |
| ENSG00000136449.9  | TREATTXTPF-00547659 225mg  | Week12 | MYCBPAP   | protein_coding | chr17 | 48585745  | 48608862 +  | 6515  | 24.19448 | 0.025414 | 0.513698 | 0.161696 | 3.176934 | 0.001644 | 0.092442 | 1 |
| ENSG00000078487.13 | TREATTXTPF-00547659 225mg  | Week12 | ZCWPW1    | protein_coding | chr7  | 99998449  | 100026615 - | 3318  | 277.2696 | 0.00221  | 0.234239 | 0.073737 | 3.176692 | 0.001645 | 0.092461 | 1 |
| ENSG00000042088.9  | TREATTXTPF-00547659 225mg  | Week12 | TDP1      | protein_coding | chr14 | 90421283  | 90511106 +  | 6221  | 913.7414 | 0        | 0.270069 | 0.085025 | 3.176363 | 0.001647 | 0.092461 | 1 |
| ENSG00000175048.12 | TREATTXTPF-00547659 75mg   | Week12 | ZDHHC14   | protein_coding | chr6  | 157802165 | 158099178 + | 11121 | 216.7956 | 0.00221  | 0.278925 | 0.087818 | 3.17617  | 0.001648 | 0.092461 | 1 |
| ENSG00000107862.4  | TREATTXTPF-00547659 225mg  | Week12 | GBF1      | protein_coding | chr10 | 104005289 | 104142656 + | 6641  | 3783.838 | 0        | 0.188968 | 0.059498 | 3.176052 | 0.001648 | 0.092461 | 1 |
| ENSG00000247324.2  | TREATTXTPF-00547659 225mg  | Week12 | RP11-510f | antisense      | chr16 | 71496181  | 71499844 +  | 2793  | 3.265193 | 0.41768  | 0.469585 | 0.147858 | 3.175919 | 0.001649 | 0.092461 | 1 |
| ENSG00000143811.12 | TREATTXTPF-00547659 225mg  | Week12 | PYCR2     | protein_coding | chr1  | 226107578 | 226111978 - | 3539  | 2088.503 | 0        | 0.201692 | 0.063509 | 3.175808 | 0.00165  | 0.092461 | 1 |
| ENSG00000101049.10 | TREATTXTPF-00547659 225mg  | Week12 | SGK2      | protein_coding | chr20 | 42187608  | 42216877 +  | 3465  | 17.85746 | 0.044199 | 0.549552 | 0.173066 | 3.175397 | 0.001652 | 0.092493 | 1 |
| ENSG00000055070.12 | TREATTXTPF-00547659 225mg  | Week12 | SZRD1     | protein_coding | chr1  | 16679070  | 16724640 +  | 4747  | 7565.78  | 0        | 0.118787 | 0.037409 | 3.175349 | 0.001652 | 0.092493 | 1 |
| ENSG00000188042.5  | TREATTXTPF-00547659 75mg   | Week12 | ARL4C     | protein_coding | chr2  | 235401685 | 235405697 - | 4013  | 6705.014 | 0        | 0.299555 | 0.094365 | 3.174432 | 0.001657 | 0.092648 | 1 |



|                    |                            |        |           |                |       |           |             |       |          |          |          |          |          |          |          |   |
|--------------------|----------------------------|--------|-----------|----------------|-------|-----------|-------------|-------|----------|----------|----------|----------|----------|----------|----------|---|
| ENSG00000100813.10 | TREATTXTPF-00547659 225mg  | Week12 | ACIN1     | protein_coding | chr14 | 23527773  | 23564823 -  | 9110  | 12227.02 | 0        | 0.154787 | 0.048761 | 3.174406 | 0.001657 | 0.092648 | 1 |
| ENSG00000154767.10 | TREATTXTPF-00547659 75mg   | Week12 | XPC       | protein_coding | chr3  | 14186647  | 14220283 -  | 4798  | 3765.66  | 0        | 0.175125 | 0.055172 | 3.174136 | 0.001659 | 0.092648 | 1 |
| ENSG00000157870.10 | TREATTXTPF-00547659 225mg  | Week12 | FAM213B   | protein_coding | chr1  | 2517930   | 2522908 +   | 3346  | 889.6718 | 0        | 0.244512 | 0.077034 | 3.1741   | 0.001659 | 0.092648 | 1 |
| ENSG00000074370.13 | TREATTXTPF-00547659 225mg  | Week12 | ATP2A3    | protein_coding | chr17 | 3827169   | 3867736 -   | 6866  | 24482.86 | 0        | 0.156751 | 0.049387 | 3.173961 | 0.001666 | 0.092648 | 1 |
| ENSG00000136628.13 | TREATTXTPF-00547659 225mg  | Week12 | EPRS      | protein_coding | chr1  | 220141943 | 220220000 - | 5450  | 3272.913 | 0        | 0.26953  | 0.08495  | 3.172815 | 0.001666 | 0.092894 | 1 |
| ENSG00000115129.9  | TREATTXTPF-00547659 22.5mg | Week12 | TP53I3    | protein_coding | chr2  | 24300303  | 24308731 -  | 2312  | 355.0619 | 0        | -0.27057 | 0.085278 | -3.17281 | 0.001666 | 0.092894 | 1 |
| ENSG00000100425.14 | TREATTXTPF-00547659 225mg  | Week12 | BRD1      | protein_coding | chr22 | 50166931  | 50221160 -  | 5850  | 2214.936 | 0        | 0.264198 | 0.083306 | 3.171423 | 0.001674 | 0.093225 | 1 |
| ENSG00000238121.1  | TREATTXTPF-00547659 225mg  | Week12 | LINC0042E | lincRNA        | chr13 | 30914407  | 30951282 -  | 3972  | 469.779  | 0        | 0.350683 | 0.110577 | 3.171392 | 0.001674 | 0.093225 | 1 |
| ENSG00000115073.6  | TREATTXTPF-00547659 225mg  | Week12 | ACTR1B    | protein_coding | chr2  | 98272431  | 98280570 -  | 2887  | 2324.703 | 0        | 0.226719 | 0.071493 | 3.171192 | 0.001675 | 0.093232 | 1 |
| ENSG00000099783.7  | TREATTXTPF-00547659 225mg  | Week12 | HNRNPM    | protein_coding | chr19 | 8509651   | 8553998 +   | 5606  | 6858.197 | 0        | 0.195533 | 0.061682 | 3.170024 | 0.001682 | 0.093421 | 1 |
| ENSG00000151623.10 | TREATTXTPF-00547659 225mg  | Week12 | NR3C2     | protein_coding | chr4  | 148999913 | 149365850 - | 6607  | 304.5945 | 0.00221  | 0.483897 | 0.152648 | 3.170022 | 0.001682 | 0.093421 | 1 |
| ENSG00000135686.8  | TREATTXTPF-00547659 225mg  | Week12 | KLHL36    | protein_coding | chr16 | 84682131  | 84701292 +  | 9995  | 3001.358 | 0        | 0.273916 | 0.08641  | 3.16997  | 0.001682 | 0.093421 | 1 |
| ENSG00000249471.3  | TREATTXTPF-00547659 225mg  | Week12 | ZNF324B   | protein_coding | chr19 | 58962971  | 58969200 +  | 4618  | 162.5624 | 0        | 0.292948 | 0.092419 | 3.169776 | 0.001683 | 0.093421 | 1 |
| ENSG00000183813.6  | TREATTXTPF-00547659 75mg   | Week12 | CCR4      | protein_coding | chr3  | 32993066  | 32997841 +  | 3095  | 867.8133 | 0        | 0.425131 | 0.134123 | 3.169704 | 0.001684 | 0.093421 | 1 |
| ENSG00000271856.1  | TREATTXTPF-00547659 225mg  | Week12 | RP11-861I | lincRNA        | chr3  | 107844668 | 107857457 + | 2592  | 609.4122 | 0.001105 | 0.476693 | 0.150426 | 3.168951 | 0.001688 | 0.093452 | 1 |
| ENSG00000245937.3  | TREATTXTPF-00547659 225mg  | Week12 | CTC-228N  | lincRNA        | chr5  | 127276118 | 127418864 - | 6464  | 340.5072 | 0.001105 | 0.31194  | 0.098447 | 3.168599 | 0.00169  | 0.093452 | 1 |
| ENSG0000023799.1   | TREATTXTPF-00547659 75mg   | Week12 | IL10RB-AS | antisense      | chr21 | 34636178  | 34638565 -  | 2228  | 89.44199 | 0.00221  | -0.28967 | 0.091422 | -3.16845 | 0.001691 | 0.093452 | 1 |
| ENSG00000185404.12 | TREATTXTPF-00547659 225mg  | Week12 | SP140L    | protein_coding | chr2  | 231191899 | 231268447 + | 5650  | 1829.238 | 0        | 0.24127  | 0.076148 | 3.168439 | 0.001691 | 0.093452 | 1 |
| ENSG00000121966.6  | TREATTXTPF-00547659 225mg  | Week12 | CXCR4     | protein_coding | chr2  | 136871919 | 136875735 - | 2224  | 18633.39 | 0        | 0.21846  | 0.068953 | 3.168247 | 0.001692 | 0.093452 | 1 |
| ENSG00000140943.12 | TREATTXTPF-00547659 225mg  | Week12 | MBTPS1    | protein_coding | chr16 | 84087368  | 84150511 -  | 10226 | 3821.298 | 0        | 0.268323 | 0.084694 | 3.168151 | 0.001692 | 0.093452 | 1 |
| ENSG00000023445.9  | TREATTXTPF-00547659 225mg  | Week12 | BIRC3     | protein_coding | chr11 | 102188215 | 102210134 + | 7484  | 3214.43  | 0        | 0.470008 | 0.148354 | 3.168147 | 0.001692 | 0.093452 | 1 |
| ENSG00000272799.1  | TREATTXTPF-00547659 22.5mg | Week12 | RP11-474I | lincRNA        | chr18 | 9912313   | 9912846 -   | 534   | 21.52707 | 0.01547  | -0.41382 | 0.130622 | -3.16811 | 0.001693 | 0.093452 | 1 |
| ENSG00000132142.15 | TREATTXTPF-00547659 225mg  | Week12 | ACACA     | protein_coding | chr17 | 35441923  | 35766909 -  | 13766 | 614.6243 | 0        | 0.274431 | 0.086625 | 3.168028 | 0.001693 | 0.093452 | 1 |
| ENSG00000166881.5  | TREATTXTPF-00547659 225mg  | Week12 | TMEM194   | protein_coding | chr12 | 57449426  | 57481846 -  | 5708  | 721.4608 | 0        | 0.394576 | 0.124567 | 3.167594 | 0.001695 | 0.093527 | 1 |
| ENSG00000158169.7  | TREATTXTPF-00547659 225mg  | Week12 | FANCC     | protein_coding | chr9  | 97861336  | 98079991 -  | 7089  | 177.7448 | 0        | 0.287647 | 0.090817 | 3.167338 | 0.001697 | 0.093527 | 1 |
| ENSG00000138378.13 | TREATTXTPF-00547659 75mg   | Week12 | STAT4     | protein_coding | chr2  | 191894302 | 192016322 - | 4250  | 2406.208 | 0        | 0.302793 | 0.095601 | 3.167262 | 0.001697 | 0.093527 | 1 |
| ENSG00000197296.5  | TREATTXTPF-00547659 225mg  | Week12 | FITM2     | protein_coding | chr20 | 42931478  | 42939809 -  | 4597  | 303.8066 | 0        | 0.320271 | 0.101131 | 3.166908 | 0.001699 | 0.093569 | 1 |
| ENSG00000197054.7  | TREATTXTPF-00547659 225mg  | Week12 | ZNF763    | protein_coding | chr19 | 12035890  | 12091196 +  | 3044  | 158.7713 | 0.00221  | 0.32817  | 0.103632 | 3.166698 | 0.001701 | 0.093569 | 1 |
| ENSG00000187116.9  | TREATTXTPF-00547659 225mg  | Week12 | LILRA5    | protein_coding | chr19 | 54818353  | 54824409 -  | 1762  | 16050.98 | 0        | -0.36044 | 0.113829 | -3.16652 | 0.001701 | 0.093569 | 1 |
| ENSG00000132002.3  | TREATTXTPF-00547659 75mg   | Week12 | DNAJB1    | protein_coding | chr19 | 14625582  | 14640582 -  | 3672  | 5216.915 | 0        | 0.139561 | 0.044077 | 3.166313 | 0.001703 | 0.093569 | 1 |
| ENSG00000137171.10 | TREATTXTPF-00547659 225mg  | Week12 | KLC4      | protein_coding | chr6  | 43008515  | 43042837 +  | 6421  | 857.1149 | 0        | 0.16075  | 0.05077  | 3.166255 | 0.001703 | 0.093569 | 1 |
| ENSG00000126016.9  | TREATTXTPF-00547659 225mg  | Week12 | AMOT      | protein_coding | chrX  | 112017731 | 112084043 - | 8502  | 112.7901 | 0.005525 | 0.41851  | 0.132199 | 3.165768 | 0.001706 | 0.093635 | 1 |
| ENSG00000048991.12 | TREATTXTPF-00547659 225mg  | Week12 | R3HDM1    | protein_coding | chr2  | 136289025 | 136482840 + | 7898  | 1064.23  | 0        | 0.290377 | 0.091726 | 3.165693 | 0.001706 | 0.093635 | 1 |
| ENSG00000115282.15 | TREATTXTPF-00547659 225mg  | Week12 | TTC31     | protein_coding | chr2  | 74710200  | 74722013 +  | 5094  | 1485.648 | 0        | 0.219451 | 0.06933  | 3.165302 | 0.001708 | 0.093703 | 1 |
| ENSG00000231113.2  | TREATTXTPF-00547659 225mg  | Week12 | RP3-475N  | antisense      | chr6  | 42908102  | 42916098 +  | 1490  | 473.7204 | 0        | 0.200386 | 0.06332  | 3.164656 | 0.001712 | 0.093761 | 1 |
| ENSG00000156511.1  | TREATTXTPF-00547659 225mg  | Week12 | RP11-61O  | lincRNA        | chr14 | 98602411  | 98605579 +  | 374   | 44.83757 | 0.020994 | 0.56278  | 0.177833 | 3.164648 | 0.001712 | 0.093761 | 1 |
| ENSG00000122203.10 | TREATTXTPF-00547659 225mg  | Week12 | KIAA1191  | protein_coding | chr5  | 175773064 | 175788971 - | 3973  | 1975.558 | 0        | 0.24869  | 0.078586 | 3.16457  | 0.001713 | 0.093761 | 1 |
| ENSG00000181007.7  | TREATTXTPF-00547659 225mg  | Week12 | ZFP82     | protein_coding | chr19 | 36874022  | 36909558 -  | 7506  | 223.3669 | 0.001105 | 0.346613 | 0.109542 | 3.16421  | 0.001715 | 0.093761 | 1 |
| ENSG00000112599.8  | TREATTXTPF-00547659 225mg  | Week12 | GUCA1B    | protein_coding | chr6  | 42152139  | 42162654 -  | 1113  | 74.49834 | 0.00663  | 0.361391 | 0.114218 | 3.164038 | 0.001716 | 0.093761 | 1 |
| ENSG00000065526.6  | TREATTXTPF-00547659 225mg  | Week12 | SPEN      | protein_coding | chr1  | 16174359  | 16266955 +  | 13294 | 5750.085 | 0        | 0.26327  | 0.083223 | 3.163438 | 0.001719 | 0.093761 | 1 |
| ENSG00000181036.9  | TREATTXTPF-00547659 75mg   | Week12 | FCRL6     | protein_coding | chr1  | 159770301 | 159786041 + | 2671  | 1510.527 | 0        | 0.453272 | 0.143291 | 3.16329  | 0.00172  | 0.093761 | 1 |
| ENSG0000003056.3   | TREATTXTPF-00547659 225mg  | Week12 | M6PR      | protein_coding | chr12 | 9092959   | 9102551 -   | 3777  | 6096.933 | 0        | 0.252603 | 0.079857 | 3.163196 | 0.00172  | 0.093761 | 1 |
| ENSG00000221866.5  | TREATTXTPF-00547659 225mg  | Week12 | PLXNA4    | protein_coding | chr7  | 131808091 | 132333447 - | 16372 | 94.61105 | 0.005525 | 0.495945 | 0.156793 | 3.163057 | 0.001721 | 0.093761 | 1 |
| ENSG00000174989.8  | TREATTXTPF-00547659 225mg  | Week12 | F8XW8     | protein_coding | chr12 | 117348761 | 117468953 + | 5169  | 425.2442 | 0        | 0.351002 | 0.110972 | 3.162985 | 0.001722 | 0.093761 | 1 |
| ENSG00000042445.9  | TREATTXTPF-00547659 75mg   | Week12 | RETSAT    | protein_coding | chr2  | 85569211  | 85581743 -  | 4264  | 1053.683 | 0        | 0.180295 | 0.057003 | 3.162917 | 0.001722 | 0.093761 | 1 |
| ENSG00000185101.8  | TREATTXTPF-00547659 225mg  | Week12 | ANO9      | protein_coding | chr11 | 417933    | 442011 -    | 6207  | 1066.309 | 0        | 0.38782  | 0.122621 | 3.162761 | 0.001723 | 0.093761 | 1 |
| ENSG00000137747.10 | TREATTXTPF-00547659 225mg  | Week12 | TMPRSS13  | protein_coding | chr11 | 117771358 | 117800174 - | 5367  | 113.2254 | 0.001105 | 0.29902  | 0.094544 | 3.162749 | 0.001723 | 0.093761 | 1 |
| ENSG00000228663.1  | TREATTXTPF-00547659 225mg  | Week12 | PSMD10P   | pseudogene     | chr20 | 49530268  | 49530948 +  | 681   | 21.01989 | 0.043094 | 0.567366 | 0.179394 | 3.162688 | 0.001723 | 0.093761 | 1 |
| ENSG00000156395.8  | TREATTXTPF-00547659 225mg  | Week12 | SORCS3    | protein_coding | chr10 | 106400859 | 107024993 + | 6182  | 43.27514 | 0.041989 | 0.614242 | 0.194232 | 3.162407 | 0.001725 | 0.093795 | 1 |
| ENSG00000197182.8  | TREATTXTPF-00547659 75mg   | Week12 | FLJ27365  | protein_coding | chr22 | 46449749  | 46509808 +  | 5728  | 222.7768 | 0        | 0.272789 | 0.086267 | 3.162137 | 0.001726 | 0.093808 | 1 |
| ENSG00000141068.9  | TREATTXTPF-00547659 225mg  | Week12 | KSR1      | protein_coding | chr17 | 25783670  | 25953461 +  | 11817 | 2658.19  | 0        | 0.264009 | 0.083494 | 3.162011 | 0.001727 | 0.093808 | 1 |
| ENSG00000125459.10 | TREATTXTPF-00547659 225mg  | Week12 | MSTO1     | protein_coding | chr1  | 155579979 | 155718153 + | 5359  | 273.3293 | 0        | 0.281455 | 0.089016 | 3.161849 | 0.001728 | 0.093808 | 1 |
| ENSG00000204623.4  | TREATTXTPF-00547659 225mg  | Week12 | ZNRD1-AS  | antisense      | chr6  | 29968788  | 30029417 -  | 19531 | 372.5779 | 0.001105 | 0.447254 | 0.141474 | 3.161395 | 0.001731 | 0.09385  | 1 |

|                    |                            |        |           |                |       |           |             |       |          |          |          |          |          |          |          |   |
|--------------------|----------------------------|--------|-----------|----------------|-------|-----------|-------------|-------|----------|----------|----------|----------|----------|----------|----------|---|
| ENSG00000143093.10 | TREATTXTPF-00547659 75mg   | Week12 | STRIP1    | protein_coding | chr1  | 110574199 | 110617263 + | 7352  | 2012.431 | 0        | 0.160403 | 0.050739 | 3.16137  | 0.001731 | 0.09385  | 1 |
| ENSG00000141076.13 | TREATTXTPF-00547659 225mg  | Week12 | CIRH1A    | protein_coding | chr16 | 69165194  | 69265033 +  | 5681  | 750.9724 | 0        | 0.249003 | 0.078769 | 3.161172 | 0.001732 | 0.093858 | 1 |
| ENSG00000153575.6  | TREATTXTPF-00547659 225mg  | Week12 | TUBGCP5   | protein_coding | chr15 | 22833395  | 22873892 +  | 5940  | 401.8541 | 0.001105 | 0.357895 | 0.113256 | 3.160059 | 0.001738 | 0.094125 | 1 |
| ENSG00000158604.10 | TREATTXTPF-00547659 225mg  | Week12 | TMED4     | protein_coding | chr7  | 44617493  | 44621886 +  | 3769  | 3247.283 | 0        | 0.160805 | 0.050889 | 3.159927 | 0.001739 | 0.094125 | 1 |
| ENSG00000153898.8  | TREATTXTPF-00547659 225mg  | Week12 | MCOLN2    | protein_coding | chr1  | 85391268  | 85462796 -  | 3440  | 442.8232 | 0        | 0.405992 | 0.128493 | 3.159636 | 0.001741 | 0.094125 | 1 |
| ENSG00000113319.7  | TREATTXTPF-00547659 225mg  | Week12 | RASGRF2   | protein_coding | chr5  | 80256491  | 80525975 +  | 10720 | 655.5602 | 0.001105 | 0.391688 | 0.123967 | 3.159627 | 0.001741 | 0.094125 | 1 |
| ENSG00000172349.12 | TREATTXTPF-00547659 75mg   | Week12 | IL16      | protein_coding | chr15 | 81451916  | 81605104 +  | 10875 | 21669.99 | 0        | 0.133014 | 0.042107 | 3.158931 | 0.001745 | 0.094289 | 1 |
| ENSG00000135966.8  | TREATTXTPF-00547659 225mg  | Week12 | TGFBRAP1  | protein_coding | chr2  | 105880871 | 105946491 - | 5982  | 1260.007 | 0        | 0.25162  | 0.079672 | 3.1582   | 0.001749 | 0.094438 | 1 |
| ENSG00000163482.7  | TREATTXTPF-00547659 225mg  | Week12 | STK36     | protein_coding | chr2  | 219536749 | 219567439 + | 6458  | 381.0597 | 0.001105 | 0.246398 | 0.078024 | 3.157992 | 0.00175  | 0.094438 | 1 |
| ENSG00000225032.1  | TREATTXTPF-00547659 225mg  | Week12 | RP11-228f | antisense      | chr9  | 130578345 | 130584799 + | 2247  | 123.1094 | 0.00221  | 0.438967 | 0.139013 | 3.15775  | 0.001752 | 0.094438 | 1 |
| ENSG00000110448.6  | TREATTXTPF-00547659 75mg   | Week12 | CD5       | protein_coding | chr11 | 60869867  | 60895324 +  | 3221  | 5431.571 | 0        | 0.329076 | 0.104216 | 3.157637 | 0.001752 | 0.094438 | 1 |
| ENSG0000094880.6   | TREATTXTPF-00547659 225mg  | Week12 | CDC23     | protein_coding | chr5  | 137523339 | 137549032 - | 4616  | 940.747  | 0        | 0.308941 | 0.097841 | 3.1576   | 0.001753 | 0.094438 | 1 |
| ENSG00000205744.5  | TREATTXTPF-00547659 225mg  | Week12 | DENND1C   | protein_coding | chr19 | 6467218   | 6482568 -   | 4657  | 7137.203 | 0        | 0.166521 | 0.052742 | 3.157305 | 0.001754 | 0.094469 | 1 |
| ENSG00000164574.11 | TREATTXTPF-00547659 225mg  | Week12 | GALNT10   | protein_coding | chr5  | 153570290 | 153800544 + | 10497 | 3443.204 | 0        | 0.160228 | 0.050751 | 3.157104 | 0.001756 | 0.094469 | 1 |
| ENSG0000070061.10  | TREATTXTPF-00547659 225mg  | Week12 | IKBKAP    | protein_coding | chr9  | 111629797 | 111696396 - | 6048  | 1622.612 | 0        | 0.299337 | 0.094826 | 3.156703 | 0.001758 | 0.094469 | 1 |
| ENSG00000112511.13 | TREATTXTPF-00547659 75mg   | Week12 | PHF1      | protein_coding | chr6  | 33378176  | 33384230 +  | 3596  | 3493.235 | 0        | 0.197608 | 0.062601 | 3.156643 | 0.001758 | 0.094469 | 1 |
| ENSG00000101361.10 | TREATTXTPF-00547659 225mg  | Week12 | NOP56     | protein_coding | chr20 | 2632791   | 2639039 +   | 4761  | 3164.631 | 0        | 0.243259 | 0.077068 | 3.156396 | 0.00176  | 0.094469 | 1 |
| ENSG00000173456.4  | TREATTXTPF-00547659 225mg  | Week12 | RNF26     | protein_coding | chr11 | 119205237 | 119208023 + | 2787  | 1152.202 | 0        | 0.232236 | 0.073583 | 3.156124 | 0.001761 | 0.094469 | 1 |
| ENSG00000158869.6  | TREATTXTPF-00547659 225mg  | Week12 | RFC1G     | protein_coding | chr1  | 161185024 | 161190489 + | 964   | 22659.45 | 0        | -0.29184 | 0.092469 | -3.15604 | 0.001762 | 0.094469 | 1 |
| ENSG00000103061.7  | TREATTXTPF-00547659 225mg  | Week12 | SLC7A6OS  | protein_coding | chr16 | 68318406  | 68344849 -  | 5187  | 1670.277 | 0        | 0.209218 | 0.066291 | 3.156032 | 0.001762 | 0.094469 | 1 |
| ENSG0000007350.12  | TREATTXTPF-00547659 225mg  | Week12 | TKTL1     | protein_coding | chrX  | 153524024 | 153558700 + | 3650  | 252.5304 | 0        | 0.327936 | 0.103917 | 3.155762 | 0.001763 | 0.094469 | 1 |
| ENSG00000141503.11 | TREATTXTPF-00547659 225mg  | Week12 | MINK1     | protein_coding | chr17 | 4736683   | 4801356 +   | 7817  | 5654.406 | 0        | 0.189117 | 0.059929 | 3.155674 | 0.001764 | 0.094469 | 1 |
| ENSG00000178773.10 | TREATTXTPF-00547659 75mg   | Week12 | CPNE7     | protein_coding | chr16 | 89642176  | 89663654 +  | 3048  | 25.41657 | 0.029834 | 0.504328 | 0.159819 | 3.155623 | 0.001764 | 0.094469 | 1 |
| ENSG00000162426.10 | TREATTXTPF-00547659 75mg   | Week12 | SLC45A1   | protein_coding | chr1  | 8377886   | 8404227 +   | 2888  | 27.96022 | 0.01326  | 0.43034  | 0.136381 | 3.155424 | 0.001765 | 0.094478 | 1 |
| ENSG00000043143.16 | TREATTXTPF-00547659 22.5mg | Week12 | PHF15     | protein_coding | chr5  | 133860003 | 133918918 + | 9873  | 4999.319 | 0        | 0.244301 | 0.07743  | 3.155111 | 0.001767 | 0.094522 | 1 |
| ENSG00000117322.12 | TREATTXTPF-00547659 225mg  | Week12 | CR2       | protein_coding | chr1  | 207627575 | 207663240 + | 4885  | 325.3425 | 0        | 0.459388 | 0.145628 | 3.154536 | 0.001771 | 0.094598 | 1 |
| ENSG00000155229.16 | TREATTXTPF-00547659 225mg  | Week12 | MMS19     | protein_coding | chr10 | 99218081  | 99258551 -  | 5855  | 2388.198 | 0        | 0.218698 | 0.069329 | 3.154514 | 0.001771 | 0.094598 | 1 |
| ENSG00000180385.4  | TREATTXTPF-00547659 225mg  | Week12 | AC034193  | pseudogene     | chr3  | 10028577  | 10048674 +  | 3714  | 94.32818 | 0.003315 | 0.336468 | 0.106668 | 3.15436  | 0.001772 | 0.094598 | 1 |
| ENSG00000101158.8  | TREATTXTPF-00547659 225mg  | Week12 | NELFCD    | protein_coding | chr20 | 57556263  | 57570188 +  | 6298  | 2043.264 | 0        | 0.234108 | 0.074233 | 3.153704 | 0.001775 | 0.094643 | 1 |
| ENSG00000197774.8  | TREATTXTPF-00547659 225mg  | Week12 | EME2      | protein_coding | chr16 | 1823208   | 1831709 +   | 6972  | 528.3227 | 0        | 0.236367 | 0.074951 | 3.153621 | 0.001776 | 0.094643 | 1 |
| ENSG00000253865.1  | TREATTXTPF-00547659 75mg   | Week12 | RP11-394f | antisense      | chr5  | 148751737 | 148754679 + | 588   | 24.94807 | 0.01547  | 0.45925  | 0.145633 | 3.153467 | 0.001777 | 0.094643 | 1 |
| ENSG00000254477.1  | TREATTXTPF-00547659 225mg  | Week12 | RP11-63D  | lincRNA        | chr11 | 38520545  | 38521736 +  | 510   | 4.214365 | 0.445304 | -0.50632 | 0.160572 | -3.15322 | 0.001778 | 0.094643 | 1 |
| ENSG00000148218.11 | TREATTXTPF-00547659 225mg  | Week12 | ALAD      | protein_coding | chr9  | 116148597 | 116163613 - | 5170  | 1922.769 | 0        | 0.18939  | 0.060063 | 3.153201 | 0.001778 | 0.094643 | 1 |
| ENSG00000160633.8  | TREATTXTPF-00547659 225mg  | Week12 | SAFB      | protein_coding | chr19 | 5623046   | 5668489 +   | 7036  | 5813.823 | 0        | 0.131989 | 0.041859 | 3.1532   | 0.001778 | 0.094643 | 1 |
| ENSG00000255569.1  | TREATTXTPF-00547659 75mg   | Week12 | TRAV1-1   | TR_V_gene      | chr14 | 22089991  | 22090720 +  | 392   | 5.621989 | 0.014365 | 0.484658 | 0.153741 | 3.152432 | 0.001783 | 0.094831 | 1 |
| ENSG00000254420.1  | TREATTXTPF-00547659 75mg   | Week12 | RP11-452h | antisense      | chr11 | 78035804  | 78155095 +  | 437   | 46.20994 | 0.488398 | -0.54493 | 0.172914 | -3.15143 | 0.001789 | 0.095092 | 1 |
| ENSG00000270060.1  | TREATTXTPF-00547659 225mg  | Week12 | RP11-390h | sense_intronic | chr11 | 47189832  | 47191114 -  | 574   | 54.80663 | 0.005525 | 0.383836 | 0.121826 | 3.150699 | 0.001793 | 0.095246 | 1 |
| ENSG00000171130.13 | TREATTXTPF-00547659 75mg   | Week12 | ATP6V0E2  | protein_coding | chr7  | 149570057 | 149577784 + | 3332  | 1679.429 | 0        | 0.30078  | 0.095468 | 3.15058  | 0.001794 | 0.095246 | 1 |
| ENSG00000186566.7  | TREATTXTPF-00547659 225mg  | Week12 | GPATCH8   | protein_coding | chr17 | 42472652  | 42580798 -  | 9442  | 2767.414 | 0        | 0.280564 | 0.089056 | 3.150437 | 0.001795 | 0.095246 | 1 |
| ENSG00000170085.13 | TREATTXTPF-00547659 225mg  | Week12 | SIMC1     | protein_coding | chr5  | 175665365 | 175772994 + | 5702  | 428.3503 | 0.001105 | 0.348657 | 0.110679 | 3.150179 | 0.001796 | 0.095274 | 1 |
| ENSG00000163564.10 | TREATTXTPF-00547659 75mg   | Week12 | PYHIN1    | protein_coding | chr1  | 158900586 | 158946844 + | 3479  | 1316.094 | 0        | 0.352222 | 0.11182  | 3.149908 | 0.001798 | 0.095307 | 1 |
| ENSG00000118508.4  | TREATTXTPF-00547659 75mg   | Week12 | RAB32     | protein_coding | chr6  | 146864829 | 146876101 + | 1217  | 2407.976 | 0        | -0.21338 | 0.067764 | -3.1489  | 0.001804 | 0.095361 | 1 |
| ENSG00000167615.12 | TREATTXTPF-00547659 225mg  | Week12 | LENG8     | protein_coding | chr19 | 54960065  | 54973217 +  | 6470  | 14581.11 | 0        | 0.235183 | 0.07469  | 3.148793 | 0.001805 | 0.095361 | 1 |
| ENSG00000157895.7  | TREATTXTPF-00547659 225mg  | Week12 | C12orf43  | protein_coding | chr12 | 121440225 | 121454305 - | 4207  | 512.7083 | 0        | 0.2259   | 0.071745 | 3.148664 | 0.001805 | 0.095361 | 1 |
| ENSG00000066827.11 | TREATTXTPF-00547659 22.5mg | Week12 | ZFAT      | protein_coding | chr8  | 135490031 | 135725292 - | 8900  | 747.3779 | 0        | 0.166995 | 0.05304  | 3.148466 | 0.001807 | 0.095361 | 1 |
| ENSG00000128394.12 | TREATTXTPF-00547659 225mg  | Week12 | APOBEC3F  | protein_coding | chr22 | 39436609  | 39449915 +  | 3242  | 445.5459 | 0        | 0.279764 | 0.088859 | 3.148394 | 0.001807 | 0.095361 | 1 |
| ENSG00000160285.10 | TREATTXTPF-00547659 225mg  | Week12 | LSS       | protein_coding | chr21 | 47608055  | 47648738 +  | 7238  | 1387.059 | 0        | 0.269148 | 0.085493 | 3.148176 | 0.001808 | 0.095361 | 1 |
| ENSG00000233461.1  | TREATTXTPF-00547659 225mg  | Week12 | RP11-295c | antisense      | chr1  | 231658134 | 231664302 - | 1021  | 313.7171 | 0        | -0.35016 | 0.111229 | -3.14809 | 0.001809 | 0.095361 | 1 |
| ENSG00000167325.10 | TREATTXTPF-00547659 225mg  | Week12 | RRM1      | protein_coding | chr11 | 4115937   | 4160106 +   | 4178  | 1081.069 | 0        | 0.287329 | 0.091273 | 3.148028 | 0.001809 | 0.095361 | 1 |
| ENSG00000105447.8  | TREATTXTPF-00547659 225mg  | Week12 | GRWD1     | protein_coding | chr19 | 48949030  | 48960279 +  | 5763  | 1079.05  | 0        | 0.250176 | 0.079473 | 3.147951 | 0.00181  | 0.095361 | 1 |
| ENSG00000094631.14 | TREATTXTPF-00547659 225mg  | Week12 | HDAC6     | protein_coding | chrX  | 48659784  | 48683392 +  | 10412 | 1839.755 | 0        | 0.183983 | 0.058447 | 3.147844 | 0.00181  | 0.095361 | 1 |
| ENSG00000107937.14 | TREATTXTPF-00547659 225mg  | Week12 | GTPBP4    | protein_coding | chr10 | 1034338   | 1065876 +   | 6161  | 1246.115 | 0        | 0.256369 | 0.081452 | 3.147471 | 0.001813 | 0.095361 | 1 |
| ENSG00000240875.1  | TREATTXTPF-00547659 225mg  | Week12 | LINC0088f | lincRNA        | chr3  | 156465135 | 156534851 - | 3822  | 52.79006 | 0.01105  | 0.495688 | 0.157507 | 3.147082 | 0.001815 | 0.095361 | 1 |

|                    |                           |        |           |                      |       |           |           |   |       |           |          |          |          |          |          |          |   |
|--------------------|---------------------------|--------|-----------|----------------------|-------|-----------|-----------|---|-------|-----------|----------|----------|----------|----------|----------|----------|---|
| ENSG00000082014.12 | TREATTXTPF-00547659 225mg | Week12 | SMARCD3   | protein_coding       | chr7  | 150935850 | 150974982 | - | 5198  | 2218.819  | 0        | -0.20906 | 0.066432 | -3.14697 | 0.001816 | 0.095361 | 1 |
| ENSG00000226696.1  | TREATTXTPF-00547659 225mg | Week12 | LENG8-AS  | antisense            | chr19 | 54955991  | 54960223  | - | 1248  | 113.3901  | 0.00442  | 0.383966 | 0.122018 | 3.146814 | 0.001816 | 0.095361 | 1 |
| ENSG00000156650.8  | TREATTXTPF-00547659 225mg | Week12 | KAT6B     | protein_coding       | chr10 | 76585340  | 76792380  | + | 13400 | 1014.968  | 0        | 0.368754 | 0.117187 | 3.146702 | 0.001817 | 0.095361 | 1 |
| ENSG00000125637.11 | TREATTXTPF-00547659 75mg  | Week12 | PSD4      | protein_coding       | chr2  | 113914902 | 113966973 | + | 13442 | 18118.49  | 0        | 0.149543 | 0.047526 | 3.146566 | 0.001818 | 0.095361 | 1 |
| ENSG00000116151.9  | TREATTXTPF-00547659 225mg | Week12 | MORN1     | protein_coding       | chr1  | 2252692   | 2323146   | - | 8403  | 81.21657  | 0.00221  | 0.292692 | 0.093022 | 3.146476 | 0.001818 | 0.095361 | 1 |
| ENSG00000113522.9  | TREATTXTPF-00547659 225mg | Week12 | RAD50     | protein_coding       | chr5  | 131891711 | 131980313 | + | 8091  | 1018.427  | 0        | 0.344782 | 0.10958  | 3.146399 | 0.001819 | 0.095361 | 1 |
| ENSG00000242398.2  | TREATTXTPF-00547659 225mg | Week12 | RN7SL8001 | misc_RNA             | chr17 | 60083100  | 60083348  | - | 249   | 3.891713  | 0.290608 | 0.443865 | 0.141071 | 3.146397 | 0.001819 | 0.095361 | 1 |
| ENSG00000270081.1  | TREATTXTPF-00547659 225mg | Week12 | RP5-935K1 | lincRNA              | chr2  | 128601127 | 128603261 | - | 2135  | 360.8409  | 0        | 0.260951 | 0.08294  | 3.146275 | 0.00182  | 0.095361 | 1 |
| ENSG00000050327.10 | TREATTXTPF-00547659 75mg  | Week12 | ARHGEF5   | protein_coding       | chr7  | 144052381 | 144077725 | + | 5818  | 84.22652  | 0.001105 | 0.312946 | 0.099468 | 3.14621  | 0.00182  | 0.095361 | 1 |
| ENSG00000110987.4  | TREATTXTPF-00547659 225mg | Week12 | BCL7A     | protein_coding       | chr12 | 122457328 | 122499948 | + | 6563  | 328.0431  | 0.001105 | 0.454967 | 0.144635 | 3.145609 | 0.001824 | 0.095498 | 1 |
| ENSG00000213394.3  | TREATTXTPF-00547659 225mg | Week12 | RP4-747G  | pseudogene           | chr7  | 100846895 | 100847776 | - | 882   | 1.457459  | 0.671823 | 0.364146 | 0.115771 | 3.145413 | 0.001825 | 0.095507 | 1 |
| ENSG00000261546.1  | TREATTXTPF-00547659 225mg | Week12 | CTD-2555  | antisense            | chr16 | 89179583  | 89181687  | - | 2105  | 15.65193  | 0.047514 | 0.464202 | 0.147605 | 3.144897 | 0.001828 | 0.095618 | 1 |
| ENSG00000158828.5  | TREATTXTPF-00547659 225mg | Week12 | PINK1     | protein_coding       | chr1  | 20959948  | 20978004  | + | 4836  | 10611.17  | 0        | -0.25894 | 0.082361 | -3.14398 | 0.001834 | 0.095803 | 1 |
| ENSG00000145833.11 | TREATTXTPF-00547659 225mg | Week12 | DDX46     | protein_coding       | chr5  | 134094469 | 134190823 | + | 9214  | 20963.864 | 0        | 0.242033 | 0.076993 | 3.143563 | 0.001836 | 0.095803 | 1 |
| ENSG00000177873.8  | TREATTXTPF-00547659 225mg | Week12 | ZNF619    | protein_coding       | chr3  | 40518604  | 40531727  | + | 4514  | 291.3304  | 0.00221  | 0.344883 | 0.109714 | 3.143483 | 0.001837 | 0.095803 | 1 |
| ENSG00000166997.3  | TREATTXTPF-00547659 225mg | Week12 | CNPY4     | protein_coding       | chr7  | 99717236  | 99723134  | + | 2475  | 587.9083  | 0        | 0.270243 | 0.085973 | 3.143358 | 0.001837 | 0.095803 | 1 |
| ENSG00000168495.8  | TREATTXTPF-00547659 225mg | Week12 | POLR3D    | protein_coding       | chr8  | 22102617  | 22112113  | + | 5613  | 721.4398  | 0        | 0.280954 | 0.089382 | 3.1433   | 0.001838 | 0.095803 | 1 |
| ENSG00000196715.5  | TREATTXTPF-00547659 225mg | Week12 | VKORC1L1  | protein_coding       | chr7  | 65338254  | 65424550  | + | 5899  | 755.6497  | 0        | 0.250184 | 0.079597 | 3.143144 | 0.001839 | 0.095803 | 1 |
| ENSG00000124067.12 | TREATTXTPF-00547659 225mg | Week12 | SLC12A4   | protein_coding       | chr16 | 67977377  | 68003504  | - | 8298  | 768.9536  | 0        | 0.176427 | 0.056138 | 3.142719 | 0.001841 | 0.095803 | 1 |
| ENSG00000112584.9  | TREATTXTPF-00547659 225mg | Week12 | FAM120B   | protein_coding       | chr6  | 170599791 | 170716153 | + | 6029  | 2201.74   | 0        | 0.151095 | 0.048081 | 3.14251  | 0.001843 | 0.095803 | 1 |
| ENSG00000211829.2  | TREATTXTPF-00547659 75mg  | Week12 | TRDC      | TR_C_gene            | chr14 | 22931924  | 22934779  | + | 720   | 1444.555  | 0        | 0.397019 | 0.126338 | 3.14251  | 0.001843 | 0.095803 | 1 |
| ENSG00000132846.5  | TREATTXTPF-00547659 225mg | Week12 | ZBED3     | protein_coding       | chr5  | 76367897  | 76383148  | - | 6514  | 220.2442  | 0.003315 | 0.376579 | 0.119836 | 3.142443 | 0.001843 | 0.095803 | 1 |
| ENSG00000204394.8  | TREATTXTPF-00547659 225mg | Week12 | VARS      | protein_coding       | chr6  | 31745295  | 31763730  | - | 6081  | 2121.709  | 0        | 0.252957 | 0.080498 | 3.142402 | 0.001843 | 0.095803 | 1 |
| ENSG00000148219.12 | TREATTXTPF-00547659 225mg | Week12 | ASTN2     | protein_coding       | chr9  | 119187504 | 120177348 | - | 8290  | 56.89834  | 0.00221  | 0.397691 | 0.126561 | 3.142282 | 0.001844 | 0.095803 | 1 |
| ENSG00000204519.6  | TREATTXTPF-00547659 225mg | Week12 | ZNF551    | protein_coding       | chr19 | 58193337  | 58228669  | + | 4709  | 350.021   | 0.001105 | 0.452407 | 0.143981 | 3.142138 | 0.001845 | 0.095803 | 1 |
| ENSG00000250361.2  | TREATTXTPF-00547659 225mg | Week12 | GYPB      | protein_coding       | chr4  | 144917257 | 145061844 | + | 1659  | 166.0519  | 0.00884  | -0.76963 | 0.244951 | -3.14198 | 0.001846 | 0.095803 | 1 |
| ENSG00000229164.5  | TREATTXTPF-00547659 75mg  | Week12 | TRAC      | TR_C_gene            | chr14 | 23016447  | 23021097  | + | 974   | 15945.28  | 0        | 0.338616 | 0.107791 | 3.141417 | 0.001849 | 0.095803 | 1 |
| ENSG00000228794.4  | TREATTXTPF-00547659 225mg | Week12 | RP11-206L | processed_transcript | chr1  | 762988    | 794826    | + | 8525  | 349.6773  | 0        | 0.285695 | 0.090946 | 3.141389 | 0.001849 | 0.095822 | 1 |
| ENSG00000233351.1  | TREATTXTPF-00547659 75mg  | Week12 | RP1-69D1  | antisense            | chr6  | 129800760 | 129802555 | - | 391   | 1.022099  | 0.760221 | 0.313896 | 0.099925 | 3.141329 | 0.00185  | 0.095822 | 1 |
| ENSG00000196793.9  | TREATTXTPF-00547659 225mg | Week12 | ZNF239    | protein_coding       | chr10 | 44051792  | 44070066  | - | 2509  | 73.1768   | 0.01105  | 0.524233 | 0.1669   | 3.141003 | 0.001852 | 0.095822 | 1 |
| ENSG00000101346.7  | TREATTXTPF-00547659 225mg | Week12 | POFU1     | protein_coding       | chr20 | 30795683  | 30826470  | + | 6426  | 1241.219  | 0        | 0.255195 | 0.081249 | 3.140902 | 0.001852 | 0.095822 | 1 |
| ENSG00000107581.8  | TREATTXTPF-00547659 225mg | Week12 | EIF3A     | protein_coding       | chr10 | 120794356 | 120840316 | - | 6048  | 6380.497  | 0        | 0.310554 | 0.098876 | 3.140849 | 0.001853 | 0.095822 | 1 |
| ENSG00000155256.13 | TREATTXTPF-00547659 225mg | Week12 | ZFYVE27   | protein_coding       | chr10 | 99496878  | 99520664  | + | 4031  | 2719.187  | 0        | 0.152349 | 0.048514 | 3.140295 | 0.001856 | 0.095822 | 1 |
| ENSG00000211793.2  | TREATTXTPF-00547659 225mg | Week12 | TRAV9-2   | TR_V_gene            | chr14 | 22409313  | 22409848  | + | 394   | 260.189   | 0.001105 | 0.407345 | 0.129716 | 3.140291 | 0.001856 | 0.095822 | 1 |
| ENSG00000143486.11 | TREATTXTPF-00547659 225mg | Week12 | EIF2D     | protein_coding       | chr1  | 206744620 | 206785904 | + | 2882  | 1645.641  | 0        | 0.259569 | 0.082664 | 3.140046 | 0.001858 | 0.095822 | 1 |
| ENSG00000139725.3  | TREATTXTPF-00547659 225mg | Week12 | RHF       | protein_coding       | chr12 | 122215664 | 122241309 | - | 6177  | 4453.059  | 0        | 0.236511 | 0.075326 | 3.139841 | 0.001859 | 0.095822 | 1 |
| ENSG00000171466.5  | TREATTXTPF-00547659 225mg | Week12 | ZNF562    | protein_coding       | chr19 | 9759330   | 9785776   | - | 6175  | 670.4641  | 0        | 0.270932 | 0.086295 | 3.139584 | 0.00186  | 0.095822 | 1 |
| ENSG00000214765.4  | TREATTXTPF-00547659 225mg | Week12 | SEPT7P2   | pseudogene           | chr7  | 45763379  | 45808617  | - | 4538  | 412.3569  | 0.001105 | 0.327913 | 0.104446 | 3.139554 | 0.001861 | 0.095822 | 1 |
| ENSG00000120659.10 | TREATTXTPF-00547659 225mg | Week12 | TNFSF11   | protein_coding       | chr13 | 43136872  | 43182149  | + | 2733  | 11.84751  | 0.097238 | 0.581882 | 0.18535  | 3.139377 | 0.001862 | 0.095822 | 1 |
| ENSG00000091409.10 | TREATTXTPF-00547659 225mg | Week12 | ITGA6     | protein_coding       | chr2  | 173292082 | 173371181 | + | 6704  | 1853.372  | 0        | 0.39685  | 0.126416 | 3.13924  | 0.001863 | 0.095822 | 1 |
| ENSG00000130749.5  | TREATTXTPF-00547659 225mg | Week12 | ZC3H4     | protein_coding       | chr19 | 47567444  | 47617009  | - | 6502  | 3059.927  | 0        | 0.21178  | 0.067463 | 3.139184 | 0.001863 | 0.095822 | 1 |
| ENSG00000255363.1  | TREATTXTPF-00547659 7.5mg | Week12 | RP11-672L | lincRNA              | chr11 | 76339140  | 76341407  | - | 559   | 2.020994  | 0.560221 | 0.393408 | 0.125324 | 3.139142 | 0.001863 | 0.095822 | 1 |
| ENSG00000175414.6  | TREATTXTPF-00547659 225mg | Week12 | ARL10     | protein_coding       | chr5  | 175792471 | 175828866 | + | 11459 | 417.7646  | 0.001105 | 0.482596 | 0.153736 | 3.139121 | 0.001863 | 0.095822 | 1 |
| ENSG00000011021.17 | TREATTXTPF-00547659 225mg | Week12 | CLCN6     | protein_coding       | chr1  | 11866207  | 11903201  | + | 6884  | 850.5635  | 0        | 0.28381  | 0.090417 | 3.138916 | 0.001865 | 0.095835 | 1 |
| ENSG00000099622.9  | TREATTXTPF-00547659 225mg | Week12 | CIRBP     | protein_coding       | chr19 | 1259384   | 1274879   | + | 6890  | 11746.39  | 0        | 0.188863 | 0.060173 | 3.138661 | 0.001866 | 0.095843 | 1 |
| ENSG00000173065.9  | TREATTXTPF-00547659 225mg | Week12 | FAM222B   | protein_coding       | chr17 | 27082996  | 27182250  | - | 5516  | 866.221   | 0        | 0.163612 | 0.05213  | 3.138562 | 0.001867 | 0.095843 | 1 |
| ENSG00000257386.1  | TREATTXTPF-00547659 7.5mg | Week12 | RP11-56G  | antisense            | chr12 | 74931925  | 74932413  | - | 375   | 1.428729  | 0.654144 | 0.349268 | 0.111324 | 3.137407 | 0.001874 | 0.096157 | 1 |
| ENSG00000144580.9  | TREATTXTPF-00547659 225mg | Week12 | RQCD1     | protein_coding       | chr2  | 219433303 | 219461803 | + | 5292  | 1979.534  | 0        | 0.220706 | 0.070354 | 3.137084 | 0.001876 | 0.096208 | 1 |
| ENSG00000130299.12 | TREATTXTPF-00547659 225mg | Week12 | ITPBP3    | protein_coding       | chr19 | 17445729  | 17453544  | + | 4532  | 463.568   | 0        | 0.293589 | 0.093597 | 3.136733 | 0.001878 | 0.096268 | 1 |
| ENSG00000099282.5  | TREATTXTPF-00547659 75mg  | Week12 | TSPAN15   | protein_coding       | chr10 | 71211229  | 71267425  | + | 2646  | 71.59669  | 0.00663  | 0.447004 | 0.14257  | 3.135341 | 0.001887 | 0.096624 | 1 |
| ENSG00000167522.10 | TREATTXTPF-00547659 225mg | Week12 | ANKRD11   | protein_coding       | chr16 | 89334038  | 89556969  | - | 15352 | 5910.292  | 0        | 0.175013 | 0.055826 | 3.134951 | 0.001889 | 0.096624 | 1 |
| ENSG00000215788.5  | TREATTXTPF-00547659 225mg | Week12 | TNFRSF25  | protein_coding       | chr1  | 6521211   | 6526255   | - | 3918  | 2322.715  | 0        | 0.388859 | 0.124046 | 3.134808 | 0.00189  | 0.096624 | 1 |
| ENSG00000139193.3  | TREATTXTPF-00547659 225mg | Week12 | CD27      | protein_coding       | chr12 | 6554033   | 6560884   | + | 1410  | 3838.575  | 0        | 0.340459 | 0.108609 |          |          |          |   |

|                    |                            |        |           |                |       |           |             |       |          |          |          |          |          |          |          |   |
|--------------------|----------------------------|--------|-----------|----------------|-------|-----------|-------------|-------|----------|----------|----------|----------|----------|----------|----------|---|
| ENSG00000163754.13 | TREATTXTPF-00547659 75mg   | Week12 | GYG1      | protein_coding | chr3  | 148709128 | 148745419 + | 3475  | 6292.619 | 0        | -0.38571 | 0.123046 | -3.13469 | 0.001891 | 0.096624 | 1 |
| ENSG00000186260.12 | TREATTXTPF-00547659 225mg  | Week12 | MKL2      | protein_coding | chr16 | 14165178  | 14360630 +  | 16578 | 214.9017 | 0.00221  | 0.55712  | 0.177743 | 3.134412 | 0.001892 | 0.096624 | 1 |
| ENSG00000272365.1  | TREATTXTPF-00547659 225mg  | Week12 | RP11-389C | lincRNA        | chr5  | 71663446  | 71664222 +  | 777   | 35.56464 | 0.01547  | 0.544662 | 0.173776 | 3.134269 | 0.001893 | 0.096624 | 1 |
| ENSG00000213672.3  | TREATTXTPF-00547659 225mg  | Week12 | NCKIPSD   | protein_coding | chr3  | 48701364  | 48723797 +  | 3635  | 584.1956 | 0        | 0.228222 | 0.072821 | 3.133997 | 0.001895 | 0.096624 | 1 |
| ENSG00000158545.11 | TREATTXTPF-00547659 225mg  | Week12 | ZC3H18    | protein_coding | chr16 | 88636789  | 88698374 +  | 8648  | 3249.919 | 0        | 0.17301  | 0.055206 | 3.133912 | 0.001896 | 0.096624 | 1 |
| ENSG00000164241.9  | TREATTXTPF-00547659 225mg  | Week12 | C5orf63   | protein_coding | chr5  | 126378250 | 126409184 - | 7190  | 137.453  | 0.003315 | 0.444681 | 0.141898 | 3.133818 | 0.001896 | 0.096624 | 1 |
| ENSG00000196363.5  | TREATTXTPF-00547659 225mg  | Week12 | WDR5      | protein_coding | chr9  | 137000487 | 137025093 + | 3660  | 1376.74  | 0        | 0.214241 | 0.068364 | 3.133816 | 0.001896 | 0.096624 | 1 |
| ENSG00000101004.10 | TREATTXTPF-00547659 225mg  | Week12 | NINL      | protein_coding | chr20 | 25433341  | 25566153 -  | 6008  | 52.54365 | 0.014365 | 0.52611  | 0.167912 | 3.133254 | 0.0019   | 0.096751 | 1 |
| ENSG00000100385.9  | TREATTXTPF-00547659 75mg   | Week12 | IL2RB     | protein_coding | chr22 | 37521878  | 37571094 -  | 4700  | 6972.175 | 0        | 0.344255 | 0.109882 | 3.132942 | 0.001902 | 0.096756 | 1 |
| ENSG00000005100.8  | TREATTXTPF-00547659 225mg  | Week12 | DHX33     | protein_coding | chr17 | 5344232   | 5372380 -   | 5872  | 535.2575 | 0.001105 | 0.355341 | 0.113422 | 3.132914 | 0.001902 | 0.096756 | 1 |
| ENSG00000179222.13 | TREATTXTPF-00547659 225mg  | Week12 | MAGED1    | protein_coding | chrX  | 51546103  | 51645453 +  | 6016  | 1174.478 | 0        | 0.280983 | 0.089694 | 3.132695 | 0.001903 | 0.096774 | 1 |
| ENSG00000185189.11 | TREATTXTPF-00547659 225mg  | Week12 | NRBP2     | protein_coding | chr8  | 144915764 | 144924200 - | 4936  | 386.2807 | 0.001105 | 0.347476 | 0.110975 | 3.131126 | 0.001913 | 0.097187 | 1 |
| ENSG00000168803.10 | TREATTXTPF-00547659 225mg  | Week12 | ADAL      | protein_coding | chr15 | 43622872  | 43646096 +  | 5054  | 128.2696 | 0.001105 | 0.323061 | 0.103179 | 3.131078 | 0.001913 | 0.097187 | 1 |
| ENSG00000249042.1  | TREATTXTPF-00547659 22.5mg | Week12 | CTD-2015f | antisense      | chr5  | 79778112  | 79783882 -  | 1261  | 12.28729 | 0.066298 | -0.50122 | 0.160089 | -3.13087 | 0.001915 | 0.0972   | 1 |
| ENSG00000037474.10 | TREATTXTPF-00547659 225mg  | Week12 | NSUN2     | protein_coding | chr5  | 6599352   | 6633404 -   | 5506  | 2587.904 | 0        | 0.256568 | 0.081962 | 3.130321 | 0.001918 | 0.097325 | 1 |
| ENSG00000173575.14 | TREATTXTPF-00547659 225mg  | Week12 | CHD2      | protein_coding | chr15 | 93426526  | 93571237 +  | 17837 | 7175.769 | 0        | 0.226984 | 0.072534 | 3.129367 | 0.001924 | 0.097543 | 1 |
| ENSG00000134014.12 | TREATTXTPF-00547659 225mg  | Week12 | ELP3      | protein_coding | chr8  | 27947190  | 28048673 +  | 5390  | 1449.528 | 0        | 0.224722 | 0.071812 | 3.129317 | 0.001924 | 0.097543 | 1 |
| ENSG00000230289.1  | TREATTXTPF-00547659 22.5mg | Week12 | RP11-334J | antisense      | chr9  | 134391945 | 134397616 - | 473   | 4.876243 | 0.234254 | 0.474744 | 0.151746 | 3.12854  | 0.001929 | 0.097677 | 1 |
| ENSG00000122547.6  | TREATTXTPF-00547659 75mg   | Week12 | EPD1      | protein_coding | chr7  | 36192758  | 36341152 +  | 4847  | 1807.276 | 0        | 0.227798 | 0.072813 | 3.128527 | 0.00193  | 0.097677 | 1 |
| ENSG00000131043.7  | TREATTXTPF-00547659 225mg  | Week12 | AAR2      | protein_coding | chr20 | 34824381  | 34858840 +  | 3101  | 1628.617 | 0        | 0.220212 | 0.070394 | 3.128263 | 0.001931 | 0.097677 | 1 |
| ENSG00000182372.6  | TREATTXTPF-00547659 225mg  | Week12 | CLN8      | protein_coding | chr8  | 1703944   | 1734738 +   | 8111  | 880.1602 | 0        | 0.282238 | 0.090229 | 3.128037 | 0.001933 | 0.097677 | 1 |
| ENSG00000078269.9  | TREATTXTPF-00547659 22.5mg | Week12 | SYNJ2     | protein_coding | chr6  | 158402888 | 158520208 + | 9985  | 640.1127 | 0        | 0.294452 | 0.094147 | 3.127582 | 0.001936 | 0.097677 | 1 |
| ENSG00000033170.12 | TREATTXTPF-00547659 225mg  | Week12 | FUT8      | protein_coding | chr14 | 65877310  | 66210839 +  | 6889  | 542.2133 | 0        | 0.351522 | 0.112395 | 3.12756  | 0.001936 | 0.097677 | 1 |
| ENSG00000101445.5  | TREATTXTPF-00547659 75mg   | Week12 | PPP1R16B  | protein_coding | chr20 | 37434348  | 37551667 +  | 6400  | 2970.737 | 0        | 0.311798 | 0.099698 | 3.127416 | 0.001937 | 0.097677 | 1 |
| ENSG00000112053.9  | TREATTXTPF-00547659 75mg   | Week12 | SLC26A8   | protein_coding | chr6  | 35911291  | 35992645 -  | 6036  | 1126.513 | 0        | -0.42848 | 0.137013 | -3.12732 | 0.001937 | 0.097677 | 1 |
| ENSG00000116667.8  | TREATTXTPF-00547659 75mg   | Week12 | C1orf21   | protein_coding | chr1  | 184356192 | 184598154 + | 10971 | 625.4298 | 0        | 0.385467 | 0.123258 | 3.127313 | 0.001937 | 0.097677 | 1 |
| ENSG00000076650.2  | TREATTXTPF-00547659 225mg  | Week12 | GPATCH1   | protein_coding | chr19 | 33571786  | 33621448 +  | 4488  | 590.095  | 0        | 0.212726 | 0.068023 | 3.127282 | 0.001937 | 0.097677 | 1 |
| ENSG00000100416.8  | TREATTXTPF-00547659 225mg  | Week12 | TRMU      | protein_coding | chr22 | 46726772  | 46753237 +  | 8584  | 945.5669 | 0        | 0.240908 | 0.077042 | 3.126945 | 0.00194  | 0.097731 | 1 |
| ENSG00000167840.9  | TREATTXTPF-00547659 225mg  | Week12 | ZNF232    | protein_coding | chr17 | 5008836   | 5026411 -   | 2794  | 223.9282 | 0        | 0.319184 | 0.10208  | 3.126794 | 0.001941 | 0.097731 | 1 |
| ENSG00000167635.7  | TREATTXTPF-00547659 225mg  | Week12 | ZNF146    | protein_coding | chr19 | 36705504  | 36729676 +  | 4146  | 1762.516 | 0        | 0.363386 | 0.116225 | 3.126584 | 0.001942 | 0.097747 | 1 |
| ENSG00000183625.10 | TREATTXTPF-00547659 75mg   | Week12 | CCR3      | protein_coding | chr3  | 46205096  | 46308197 +  | 3647  | 2101.976 | 0.001105 | 0.439975 | 0.140729 | 3.126394 | 0.001943 | 0.097756 | 1 |
| ENSG00000108439.5  | TREATTXTPF-00547659 225mg  | Week12 | PNPO      | protein_coding | chr17 | 46018872  | 46025654 +  | 2861  | 613.5856 | 0        | 0.242947 | 0.077714 | 3.126158 | 0.001945 | 0.097768 | 1 |
| ENSG00000104921.10 | TREATTXTPF-00547659 225mg  | Week12 | FCER2     | protein_coding | chr19 | 7753644   | 7767032 -   | 2367  | 1294.491 | 0        | 0.388742 | 0.124367 | 3.125763 | 0.001947 | 0.097768 | 1 |
| ENSG00000173914.7  | TREATTXTPF-00547659 75mg   | Week12 | RBM4B     | protein_coding | chr11 | 66432469  | 66445392 -  | 4325  | 691.1204 | 0        | 0.204615 | 0.065462 | 3.125721 | 0.001947 | 0.097768 | 1 |
| ENSG00000185436.7  | TREATTXTPF-00547659 75mg   | Week12 | IFNLR1    | protein_coding | chr1  | 24480647  | 24514449 -  | 4923  | 279.3746 | 0.001105 | 0.406376 | 0.130011 | 3.125712 | 0.001947 | 0.097768 | 1 |
| ENSG00000149531.10 | TREATTXTPF-00547659 225mg  | Week12 | FRG1B     | protein_coding | chr20 | 29611857  | 29634010 +  | 1770  | 480.6088 | 0        | 0.338058 | 0.108161 | 3.125509 | 0.001949 | 0.097782 | 1 |
| ENSG00000084463.3  | TREATTXTPF-00547659 75mg   | Week12 | WBP11     | protein_coding | chr12 | 14939410  | 14956474 -  | 3418  | 3314.901 | 0        | 0.228641 | 0.073158 | 3.125313 | 0.00195  | 0.097793 | 1 |
| ENSG00000269928.1  | TREATTXTPF-00547659 225mg  | Week12 | RP11-849F | lincRNA        | chr17 | 8128139   | 8128798 -   | 660   | 432.5403 | 0.001105 | 0.272963 | 0.087352 | 3.124875 | 0.001953 | 0.097882 | 1 |
| ENSG00000067840.8  | TREATTXTPF-00547659 75mg   | Week12 | PDZD4     | protein_coding | chrX  | 153067621 | 153096020 - | 4381  | 1174.505 | 0        | 0.357405 | 0.114399 | 3.124204 | 0.001957 | 0.098008 | 1 |
| ENSG00000123064.8  | TREATTXTPF-00547659 225mg  | Week12 | DDX54     | protein_coding | chr12 | 113594979 | 113623284 - | 5064  | 2468.383 | 0        | 0.237847 | 0.076131 | 3.124164 | 0.001957 | 0.098008 | 1 |
| ENSG00000160959.3  | TREATTXTPF-00547659 225mg  | Week12 | LRRC14    | protein_coding | chr8  | 145743376 | 145750557 + | 6131  | 1003.841 | 0        | 0.240359 | 0.07695  | 3.123569 | 0.001961 | 0.098148 | 1 |
| ENSG00000213380.9  | TREATTXTPF-00547659 225mg  | Week12 | COG8      | protein_coding | chr16 | 69354043  | 69373570 -  | 5784  | 484.0818 | 0        | 0.191676 | 0.061369 | 3.123341 | 0.001963 | 0.09817  | 1 |
| ENSG00000102974.10 | TREATTXTPF-00547659 225mg  | Week12 | CTCF      | protein_coding | chr16 | 67596310  | 67673086 +  | 4301  | 3502.33  | 0        | 0.216126 | 0.06921  | 3.122766 | 0.001966 | 0.098304 | 1 |
| ENSG00000160284.10 | TREATTXTPF-00547659 225mg  | Week12 | SPATC1L   | protein_coding | chr21 | 47581062  | 47604390 -  | 2333  | 245.6597 | 0        | 0.349142 | 0.111825 | 3.122221 | 0.00197  | 0.098428 | 1 |
| ENSG00000167716.14 | TREATTXTPF-00547659 225mg  | Week12 | WDR81     | protein_coding | chr17 | 1619817   | 1641893 +   | 7913  | 2746.177 | 0        | 0.228819 | 0.073298 | 3.121774 | 0.001973 | 0.098498 | 1 |
| ENSG00000268895.1  | TREATTXTPF-00547659 225mg  | Week12 | A1BG-AS1  | antisense      | chr19 | 58859117  | 58866549 +  | 2793  | 281.9867 | 0.001105 | 0.280778 | 0.089944 | 3.121686 | 0.001973 | 0.098498 | 1 |
| ENSG00000163754.13 | TREATTXTPF-00547659 225mg  | Week12 | GYG1      | protein_coding | chr3  | 148709128 | 148745419 + | 3475  | 6292.619 | 0        | -0.39452 | 0.126392 | -3.12136 | 0.001976 | 0.098551 | 1 |
| ENSG00000136485.10 | TREATTXTPF-00547659 225mg  | Week12 | DCAF7     | protein_coding | chr17 | 61627822  | 61671639 +  | 6587  | 5923.379 | 0        | 0.215523 | 0.069057 | 3.120948 | 0.001978 | 0.098633 | 1 |
| ENSG00000135778.7  | TREATTXTPF-00547659 225mg  | Week12 | NTPCR     | protein_coding | chr1  | 233086351 | 233119628 + | 15854 | 575.4022 | 0        | 0.253235 | 0.081148 | 3.120657 | 0.00198  | 0.09864  | 1 |
| ENSG00000118113.7  | TREATTXTPF-00547659 75mg   | Week12 | MMP8      | protein_coding | chr11 | 102582526 | 102597781 - | 3438  | 982.316  | 0.00221  | -0.80006 | 0.256379 | -3.12061 | 0.00198  | 0.09864  | 1 |
| ENSG00000100994.7  | TREATTXTPF-00547659 225mg  | Week12 | PYGB      | protein_coding | chr20 | 25228705  | 25278650 +  | 4474  | 3578.52  | 0        | 0.205832 | 0.065979 | 3.119677 | 0.001987 | 0.098812 | 1 |
| ENSG00000174227.11 | TREATTXTPF-00547659 225mg  | Week12 | PIGG      | protein_coding | chr4  | 492989    | 533985 +    | 10905 | 1923.761 | 0        | 0.217797 | 0.069817 | 3.119559 | 0.001987 | 0.098812 | 1 |
| ENSG00000183696.9  | TREATTXTPF-00547659 75mg   | Week12 | UPP1      | protein_coding | chr7  | 48128225  | 48148330 +  | 4577  | 5314.838 | 0        | -0.2871  | 0.092034 | -3.11956 | 0.001987 | 0.098812 | 1 |

|                    |                            |        |           |                |       |           |             |       |          |          |          |          |          |          |          |   |
|--------------------|----------------------------|--------|-----------|----------------|-------|-----------|-------------|-------|----------|----------|----------|----------|----------|----------|----------|---|
| ENSG00000137310.7  | TREATTXTPF-00547659 75mg   | Week12 | TCF19     | protein_coding | chr6  | 31126319  | 31134936 +  | 3538  | 434.5757 | 0        | 0.271269 | 0.086961 | 3.11944  | 0.001988 | 0.098812 | 1 |
| ENSG00000179715.8  | TREATTXTPF-00547659 225mg  | Week12 | PCED1B    | protein_coding | chr12 | 47473386  | 47630443 +  | 2616  | 3032.566 | 0        | 0.333693 | 0.106984 | 3.119097 | 0.00199  | 0.098871 | 1 |
| ENSG00000272645.1  | TREATTXTPF-00547659 225mg  | Week12 | RP11-504F | lincRNA        | chr1  | 224139096 | 224141141 - | 2046  | 267.9956 | 0.001105 | 0.235144 | 0.075394 | 3.118879 | 0.001992 | 0.098891 | 1 |
| ENSG00000136270.9  | TREATTXTPF-00547659 225mg  | Week12 | TBRG4     | protein_coding | chr7  | 45139699  | 45151646 -  | 5803  | 1804.124 | 0        | 0.236913 | 0.075973 | 3.118408 | 0.001995 | 0.098992 | 1 |
| ENSG00000182134.11 | TREATTXTPF-00547659 225mg  | Week12 | TDRKH     | protein_coding | chr1  | 151742583 | 151763892 - | 5092  | 327.7945 | 0        | 0.319189 | 0.102381 | 3.117669 | 0.002    | 0.099181 | 1 |
| ENSG00000170322.10 | TREATTXTPF-00547659 225mg  | Week12 | NFRKB     | protein_coding | chr11 | 129733531 | 129765485 - | 6335  | 1686.559 | 0        | 0.205107 | 0.065798 | 3.117209 | 0.002003 | 0.09927  | 1 |
| ENSG00000204314.6  | TREATTXTPF-00547659 225mg  | Week12 | PRRT1     | protein_coding | chr6  | 32116136  | 32122150 -  | 4261  | 73.76906 | 0.00442  | 0.45357  | 0.145518 | 3.116945 | 0.002004 | 0.09927  | 1 |
| ENSG00000147144.8  | TREATTXTPF-00547659 75mg   | Week12 | CCDC120   | protein_coding | chrX  | 48911101  | 48927509 +  | 5439  | 304.7348 | 0        | 0.269435 | 0.086445 | 3.116824 | 0.002005 | 0.09927  | 1 |
| ENSG00000131779.6  | TREATTXTPF-00547659 225mg  | Week12 | PEX11B    | protein_coding | chr1  | 145516252 | 145523730 + | 1838  | 1223.196 | 0        | 0.176894 | 0.056756 | 3.11674  | 0.002006 | 0.09927  | 1 |
| ENSG00000180549.7  | TREATTXTPF-00547659 225mg  | Week12 | FUT7      | protein_coding | chr9  | 139924626 | 139927462 - | 2584  | 3783.955 | 0        | -0.30237 | 0.097028 | -3.11633 | 0.002008 | 0.09927  | 1 |
| ENSG00000175600.11 | TREATTXTPF-00547659 225mg  | Week12 | C7orf10   | protein_coding | chr7  | 40174575  | 40900362 +  | 3590  | 13.57901 | 0.064088 | 0.517231 | 0.16598  | 3.116226 | 0.002009 | 0.09927  | 1 |
| ENSG00000096384.15 | TREATTXTPF-00547659 225mg  | Week12 | HSP90AB1  | protein_coding | chr6  | 44214824  | 44221620 +  | 2796  | 17218.32 | 0        | 0.244308 | 0.078399 | 3.116202 | 0.002009 | 0.09927  | 1 |
| ENSG00000015520.10 | TREATTXTPF-00547659 225mg  | Week12 | NPC1L1    | protein_coding | chr7  | 44552134  | 44580914 -  | 5252  | 3.343646 | 0.369061 | 0.453243 | 0.145451 | 3.116124 | 0.00201  | 0.09927  | 1 |
| ENSG00000168016.9  | TREATTXTPF-00547659 22.5mg | Week12 | TRANK1    | protein_coding | chr3  | 36868311  | 36986548 -  | 11182 | 12027.15 | 0        | 0.280468 | 0.090024 | 3.115487 | 0.002014 | 0.099426 | 1 |
| ENSG00000114767.6  | TREATTXTPF-00547659 225mg  | Week12 | RRP9      | protein_coding | chr3  | 51967446  | 51975957 -  | 1578  | 449.8155 | 0        | 0.263072 | 0.084461 | 3.114702 | 0.002019 | 0.09963  | 1 |
| ENSG00000271964.1  | TREATTXTPF-00547659 225mg  | Week12 | RP11-415F | antisense      | chr3  | 16355946  | 16356494 +  | 549   | 96.70055 | 0.00442  | 0.40898  | 0.131328 | 3.114182 | 0.002023 | 0.099735 | 1 |
| ENSG00000100297.11 | TREATTXTPF-00547659 225mg  | Week12 | MCM5      | protein_coding | chr22 | 35796056  | 35821423 +  | 7338  | 2619.959 | 0        | 0.209359 | 0.067238 | 3.113678 | 0.002026 | 0.099735 | 1 |
| ENSG00000214753.2  | TREATTXTPF-00547659 225mg  | Week12 | HNRNPUL   | protein_coding | chr11 | 62480102  | 62494821 -  | 5293  | 2607.682 | 0        | 0.188843 | 0.060649 | 3.113675 | 0.002026 | 0.099735 | 1 |
| ENSG00000131115.11 | TREATTXTPF-00547659 225mg  | Week12 | ZNF227    | protein_coding | chr19 | 44711700  | 44741421 +  | 5059  | 699.0486 | 0        | 0.260872 | 0.083784 | 3.113634 | 0.002026 | 0.099735 | 1 |
| ENSG00000204568.7  | TREATTXTPF-00547659 225mg  | Week12 | MRPS18B   | protein_coding | chr6  | 30585486  | 30594172 +  | 1888  | 1381.602 | 0        | 0.243309 | 0.078144 | 3.113592 | 0.002027 | 0.099735 | 1 |
| ENSG00000140968.6  | TREATTXTPF-00547659 225mg  | Week12 | IRF8      | protein_coding | chr16 | 85932409  | 85956215 +  | 5162  | 3584.822 | 0        | 0.268554 | 0.086272 | 3.112895 | 0.002031 | 0.099841 | 1 |
| ENSG00000232869.2  | TREATTXTPF-00547659 225mg  | Week12 | TRBV29-1  | TR_V_gene      | chr7  | 142448053 | 142448741 + | 402   | 447.3978 | 0        | 0.375049 | 0.120484 | 3.112847 | 0.002032 | 0.099841 | 1 |
| ENSG00000136059.10 | TREATTXTPF-00547659 225mg  | Week12 | VILL      | protein_coding | chr3  | 38029550  | 38048679 +  | 6476  | 1013.418 | 0        | 0.237274 | 0.076226 | 3.11277  | 0.002032 | 0.099841 | 1 |
| ENSG00000145191.7  | TREATTXTPF-00547659 225mg  | Week12 | EIF2B5    | protein_coding | chr3  | 183852826 | 184402546 + | 5975  | 2109.86  | 0        | 0.225808 | 0.072546 | 3.112636 | 0.002033 | 0.099841 | 1 |
| ENSG00000213020.4  | TREATTXTPF-00547659 225mg  | Week12 | ZNF611    | protein_coding | chr19 | 53206066  | 53238326 -  | 7148  | 425.6144 | 0        | 0.270568 | 0.086933 | 3.112389 | 0.002035 | 0.09987  | 1 |
| ENSG00000070718.7  | TREATTXTPF-00547659 225mg  | Week12 | AP3M2     | protein_coding | chr8  | 42010464  | 42029191 +  | 6276  | 722.2088 | 0        | 0.334471 | 0.107472 | 3.112179 | 0.002036 | 0.099887 | 1 |
| ENSG00000100814.13 | TREATTXTPF-00547659 225mg  | Week12 | CCNB1P1   | protein_coding | chr14 | 20779527  | 20801471 -  | 3680  | 550.4022 | 0        | 0.285217 | 0.091662 | 3.111606 | 0.00204  | 0.099897 | 1 |
| ENSG00000102174.7  | TREATTXTPF-00547659 225mg  | Week12 | PHEX      | protein_coding | chrX  | 22050559  | 22269427 +  | 7132  | 47.66519 | 0.032044 | 0.575466 | 0.184946 | 3.111537 | 0.00204  | 0.099897 | 1 |
| ENSG00000100714.11 | TREATTXTPF-00547659 225mg  | Week12 | MTHFD1    | protein_coding | chr14 | 64854749  | 64926722 +  | 5924  | 1166.065 | 0        | 0.261639 | 0.084087 | 3.111531 | 0.00204  | 0.099897 | 1 |
| ENSG00000159899.10 | TREATTXTPF-00547659 225mg  | Week12 | NPR2      | protein_coding | chr9  | 35792151  | 35809729 +  | 3865  | 87.52155 | 0.005525 | 0.465778 | 0.149699 | 3.111429 | 0.002041 | 0.099897 | 1 |
| ENSG00000198046.7  | TREATTXTPF-00547659 225mg  | Week12 | ZNF667    | protein_coding | chr19 | 56950694  | 56989434 -  | 9129  | 35.93149 | 0.020994 | 0.494913 | 0.159066 | 3.111362 | 0.002042 | 0.099897 | 1 |
| ENSG00000241058.1  | TREATTXTPF-00547659 225mg  | Week12 | NSUN6     | protein_coding | chr10 | 18834490  | 18940551 -  | 2306  | 282.4983 | 0        | 0.373689 | 0.120116 | 3.111058 | 0.002044 | 0.099945 | 1 |
| ENSG00000204599.10 | TREATTXTPF-00547659 75mg   | Week12 | TRIM39    | protein_coding | chr6  | 30294256  | 30311506 +  | 4249  | 1161.498 | 0        | 0.115288 | 0.037061 | 3.110766 | 0.002045 | 0.099976 | 1 |
| ENSG00000135547.4  | TREATTXTPF-00547659 225mg  | Week12 | HEY2      | protein_coding | chr6  | 126068810 | 126082415 + | 2741  | 6.892818 | 0.176796 | 0.47848  | 0.15382  | 3.110649 | 0.002046 | 0.099976 | 1 |
