# Supplementary material for: Molecular Profiling of Ulcerative Colitis Subjects from the TURANDOT Trial Reveals Novel Pharmacodynamic/Efficacy Biomarkers
Source: PubMed Central journal article supplement — J Crohns Colitis. 2019 Mar 19;13(6):702–13. doi: 10.1093/ecco-jcc/jjy217 (PMC6535501; doi:10.1093/ecco-jcc/jjy217), 2019-03-19
Supplement: jjy217_suppl_supplementary_table_s3.pdf [file jjy217_suppl_supplementary_table_s3.pdf]

| gene     | clinEndpt | type     | gene_name | gene_type  | chr   | start    | end      | strand | length | mean_count | pct_less_than | Estimate | Std.Error | teststat | pval     | qval     | bonfppval |
|----------|-----------|----------|-----------|------------|-------|----------|----------|--------|--------|------------|---------------|----------|-----------|----------|----------|----------|-----------|
| ENSG0000 | remission | Inflamed | RP11-431J | antisense  | chrX  | 16171064 | 16188992 | -      | 1219   | 3.212411   | 0.637232      | 1.267505 | 0.199734  | 6.345974 | 6.69E-09 | 0.000176 | 0.000176  |
| ENSG0000 | remission | Inflamed | RP11-1396 | pseudoger  | chr4  | 9564791  | 9565570  | +      | 780    | 1.331742   | 0.677804      | 1.015438 | 0.179492  | 5.657304 | 1.50E-07 | 0.001966 | 0.003932  |
| ENSG0000 | remission | Inflamed | OSM       | protein_cc | chr22 | 30658818 | 30662829 | -      | 2114   | 887.6181   | 0.011933      | -3.468   | 0.648384  | -5.34868 | 5.71E-07 | 0.005006 | 0.015018  |
| ENSG0000 | remission | Inflamed | GS1-18A1  | antisense  | chr7  | 54624663 | 54639419 | +      | 3031   | 3.983294   | 0.455847      | 1.341906 | 0.259186  | 5.177392 | 1.18E-06 | 0.006304 | 0.031097  |
| ENSG0000 | remission | Inflamed | MT-ND1    | protein_cc | chrM  | 3307     | 4262     | +      | 956    | 399641.4   | 0             | 0.795231 | 0.155338  | 5.119343 | 1.51E-06 | 0.006304 | 0.039688  |
| ENSG0000 | remission | Inflamed | RP11-77E1 | lincRNA    | chr9  | 7786105  | 7786688  | -      | 584    | 3.968974   | 0.25537       | 1.012701 | 0.198283  | 5.107338 | 1.59E-06 | 0.006304 | 0.041734  |
| ENSG0000 | remission | Inflamed | RP11-351J | lincRNA    | chr6  | 1.68E+08 | 1.68E+08 | -      | 4569   | 6.579952   | 0.124105      | 1.142448 | 0.228321  | 5.003685 | 2.44E-06 | 0.006304 | 0.064248  |
| ENSG0000 | remission | Inflamed | IGKV2-29  | IG_V_pseu  | chr2  | 89533655 | 89534393 | -      | 372    | 560.7184   | 0.009547      | -2.36318 | 0.473948  | -4.98615 | 2.63E-06 | 0.006304 | 0.069082  |
| ENSG0000 | remission | Inflamed | GZMB      | protein_cc | chr14 | 25100160 | 25103473 | -      | 1408   | 226.1504   | 0             | -1.92233 | 0.385929  | -4.98105 | 2.68E-06 | 0.006304 | 0.070551  |
| ENSG0000 | remission | Inflamed | RP11-712E | pseudoger  | chr11 | 94876801 | 94878289 | +      | 1489   | 1.706444   | 0.599045      | 0.941644 | 0.189836  | 4.960306 | 2.92E-06 | 0.006304 | 0.076856  |
| ENSG0000 | remission | Inflamed | CXCL1     | protein_cc | chr4  | 74735110 | 74736959 | +      | 1296   | 4821.072   | 0             | -2.88274 | 0.582171  | -4.95171 | 3.03E-06 | 0.006304 | 0.079626  |
| ENSG0000 | remission | Inflamed | GLT1D1    | protein_cc | chr12 | 1.29E+08 | 1.29E+08 | +      | 3474   | 117.1695   | 0.078759      | -2.74051 | 0.55653   | -4.92429 | 3.39E-06 | 0.006304 | 0.089127  |
| ENSG0000 | remission | Inflamed | FCN3      | protein_cc | chr1  | 27695603 | 27701315 | -      | 2167   | 72.77566   | 0.047733      | -2.28536 | 0.466793  | -4.89588 | 3.81E-06 | 0.006304 | 0.10013   |
| ENSG0000 | remission | Inflamed | HM13      | protein_cc | chr20 | 30102231 | 30157370 | +      | 5701   | 6862.408   | 0             | -0.60435 | 0.123624  | -4.88862 | 3.92E-06 | 0.006304 | 0.10315   |
| ENSG0000 | remission | Inflamed | FPR1      | protein_cc | chr19 | 52248425 | 52307363 | -      | 2594   | 870.6014   | 0.004773      | -3.23508 | 0.662906  | -4.88015 | 4.06E-06 | 0.006304 | 0.106785  |
| ENSG0000 | remission | Inflamed | IL8       | protein_cc | chr4  | 74606223 | 74609433 | +      | 2274   | 1983.704   | 0.011933      | -3.70059 | 0.759335  | -4.87347 | 4.17E-06 | 0.006304 | 0.109737  |
| ENSG0000 | remission | Inflamed | LILRA3    | protein_cc | chr19 | 54799854 | 54809952 | -      | 1924   | 317.2888   | 0.023866      | -2.56256 | 0.52626   | -4.86938 | 4.24E-06 | 0.006304 | 0.111583  |
| ENSG0000 | remission | Inflamed | TNNC2     | protein_cc | chr20 | 44451853 | 44462384 | -      | 876    | 49.20286   | 0.019093      | 1.726727 | 0.356029  | 4.849959 | 4.59E-06 | 0.006304 | 0.120773  |
| ENSG0000 | remission | Inflamed | DRGX      | protein_cc | chr10 | 50572237 | 50603497 | -      | 2776   | 23.3747    | 0.231504      | 2.407995 | 0.497298  | 4.84216  | 4.74E-06 | 0.006304 | 0.124667  |
| ENSG0000 | remission | Inflamed | CXCL2     | protein_cc | chr4  | 74962752 | 74965010 | -      | 1500   | 829.9189   | 0.002387      | -2.19397 | 0.453356  | -4.8394  | 4.80E-06 | 0.006304 | 0.126073  |
| ENSG0000 | remission | Inflamed | CXCR1     | protein_cc | chr2  | 2.19E+08 | 2.19E+08 | -      | 2488   | 659.673    | 0.047733      | -3.73137 | 0.77405   | -4.82058 | 5.18E-06 | 0.006481 | 0.136093  |
| ENSG0000 | remission | Inflamed | CXCL3     | protein_cc | chr4  | 74902306 | 74904524 | -      | 2219   | 1581.253   | 0             | -2.11203 | 0.440119  | -4.79878 | 5.65E-06 | 0.006757 | 0.148657  |
| ENSG0000 | remission | Inflamed | IL1B      | protein_cc | chr2  | 1.14E+08 | 1.14E+08 | -      | 3096   | 3775.084   | 0             | -2.66749 | 0.560057  | -4.76289 | 6.54E-06 | 0.006871 | 0.171849  |
| ENSG0000 | remission | Inflamed | RP11-239J | antisense  | chr6  | 20212318 | 20317970 | +      | 380    | 0.973747   | 0.74463       | 0.606297 | 0.127309  | 4.762409 | 6.55E-06 | 0.006871 | 0.172183  |
| ENSG0000 | remission | Inflamed | TREM1     | protein_cc | chr6  | 41235664 | 41254457 | -      | 4329   | 395.6802   | 0.047733      | -3.23475 | 0.680137  | -4.75603 | 6.72E-06 | 0.006871 | 0.176663  |
| ENSG0000 | remission | Inflamed | OR7E22P   | pseudoger  | chr3  | 75405667 | 75406654 | -      | 988    | 1.797136   | 0.618138      | 1.041625 | 0.21914   | 4.753245 | 6.80E-06 | 0.006871 | 0.178658  |
| ENSG0000 | remission | Inflamed | HLA-DRB1  | protein_cc | chr6  | 32546546 | 32557625 | -      | 1229   | 9992.487   | 0             | -0.93966 | 0.199042  | -4.72092 | 7.74E-06 | 0.00732  | 0.203442  |
| ENSG0000 | remission | Inflamed | FBXO6     | protein_cc | chr1  | 11724181 | 11734411 | +      | 1811   | 569.2482   | 0             | -0.81195 | 0.172365  | -4.71064 | 8.06E-06 | 0.00732  | 0.211997  |
| ENSG0000 | remission | Inflamed | THNSL2    | protein_cc | chr2  | 88469835 | 88486146 | +      | 6401   | 662.4368   | 0             | 0.850912 | 0.180649  | 4.710294 | 8.07E-06 | 0.00732  | 0.212291  |
| ENSG0000 | remission | Inflamed | TINCR     | lincRNA    | chr19 | 5558178  | 5568045  | -      | 3925   | 171.8067   | 0             | 1.621198 | 0.344942  | 4.699921 | 8.42E-06 | 0.007352 | 0.221293  |
| ENSG0000 | remission | Inflamed | IFITM1    | protein_cc | chr11 | 313506   | 315272   | +      | 1080   | 3878.456   | 0             | -1.08675 | 0.231592  | -4.69255 | 8.67E-06 | 0.007352 | 0.227914  |
| ENSG0000 | remission | Inflamed | FKBP11    | protein_cc | chr12 | 49315301 | 49320257 | -      | 4957   | 3185.27    | 0             | -1.07644 | 0.230379  | -4.67247 | 9.39E-06 | 0.007492 | 0.246937  |
| ENSG0000 | remission | Inflamed | HLA-B     | protein_cc | chr6  | 31321649 | 31324965 | -      | 3012   | 102666.4   | 0             | -0.4902  | 0.105355  | -4.65285 | 1.02E-05 | 0.007492 | 0.267012  |
| ENSG0000 | remission | Inflamed | GPR97     | protein_cc | chr16 | 57702099 | 57723975 | +      | 3593   | 656.5012   | 0             | -2.30984 | 0.49737   | -4.64411 | 1.05E-05 | 0.007492 | 0.276446  |
| ENSG0000 | remission | Inflamed | DUSP5     | protein_cc | chr10 | 1.12E+08 | 1.12E+08 | +      | 2615   | 1963.702   | 0             | -1.06857 | 0.23019   | -4.64213 | 1.06E-05 | 0.007492 | 0.278629  |
| ENSG0000 | remission | Inflamed | RNASE2    | protein_cc | chr14 | 21423611 | 21424595 | +      | 755    | 21.95704   | 0.069212      | -1.676   | 0.3611    | -4.64136 | 1.06E-05 | 0.007492 | 0.279481  |
| ENSG0000 | remission | Inflamed | RPL29P30  | pseudoger  | chr15 | 71088936 | 71095027 | -      | 946    | 4.661098   | 0.48926       | 1.333048 | 0.288327  | 4.623394 | 1.14E-05 | 0.007492 | 0.300139  |
| ENSG0000 | remission | Inflamed | S100A8    | protein_cc | chr1  | 1.53E+08 | 1.53E+08 | -      | 1006   | 1747.105   | 0             | -3.6411  | 0.787703  | -4.62243 | 1.15E-05 | 0.007492 | 0.301292  |
| ENSG0000 | remission | Inflamed | S100A9    | protein_cc | chr1  | 1.53E+08 | 1.53E+08 | +      | 577    | 4812.239   | 0             | -3.22235 | 0.697561  | -4.61945 | 1.16E-05 | 0.007492 | 0.304869  |

|          |           |          |           |                  |          |          |   |      |          |          |          |          |          |          |          |          |
|----------|-----------|----------|-----------|------------------|----------|----------|---|------|----------|----------|----------|----------|----------|----------|----------|----------|
| ENSG0000 | remission | Inflamed | MT-ND2    | protein_cc chrM  | 4470     | 5511     | + | 1042 | 402854.8 | 0        | 0.779148 | 0.168791 | 4.616057 | 1.18E-05 | 0.007492 | 0.308992 |
| ENSG0000 | remission | Inflamed | VAMP5     | protein_cc chr2  | 85811531 | 85820535 | + | 819  | 458.8258 | 0        | -0.98969 | 0.214821 | -4.60706 | 1.22E-05 | 0.007492 | 0.320193 |
| ENSG0000 | remission | Inflamed | FFAR2     | protein_cc chr19 | 35934809 | 35942669 | + | 2149 | 712.7422 | 0        | -2.35057 | 0.510371 | -4.6056  | 1.22E-05 | 0.007492 | 0.322042 |
| ENSG0000 | remission | Inflamed | SOCS3     | protein_cc chr17 | 76352864 | 76356158 | - | 2729 | 6163.48  | 0        | -2.07433 | 0.4504   | -4.60552 | 1.23E-05 | 0.007492 | 0.322147 |
| ENSG0000 | remission | Inflamed | SOCS1     | protein_cc chr16 | 11348262 | 11350036 | - | 1225 | 621.043  | 0        | -1.48478 | 0.32453  | -4.57516 | 1.38E-05 | 0.008254 | 0.363172 |
| ENSG0000 | remission | Inflamed | FCGR3B    | protein_cc chr1  | 1.62E+08 | 1.62E+08 | - | 2964 | 927.5442 | 0.026253 | -3.44768 | 0.755787 | -4.56171 | 1.46E-05 | 0.008354 | 0.382916 |
| ENSG0000 | remission | Inflamed | CFB       | protein_cc chr6  | 31895475 | 31919861 | + | 6622 | 1577.456 | 0        | -1.4037  | 0.307774 | -4.56081 | 1.46E-05 | 0.008354 | 0.384277 |
| ENSG0000 | remission | Inflamed | HLA-DRB5  | protein_cc chr6  | 32485120 | 32498064 | - | 1260 | 3516.229 | 0.002387 | -1.14909 | 0.252658 | -4.54801 | 1.54E-05 | 0.008569 | 0.4041   |
| ENSG0000 | remission | Inflamed | RP11-3761 | pseudoger chr1   | 84810361 | 84815622 | + | 905  | 1.945107 | 0.546539 | 0.85536  | 0.188444 | 4.539063 | 1.59E-05 | 0.008569 | 0.418541 |
| ENSG0000 | remission | Inflamed | MT-ATP8   | protein_cc chrM  | 8366     | 8572     | + | 207  | 114755.2 | 0        | 0.738505 | 0.162729 | 4.538239 | 1.60E-05 | 0.008569 | 0.419895 |
| ENSG0000 | remission | Inflamed | PLA2G16   | protein_cc chr11 | 63340667 | 63384355 | - | 3104 | 413.9117 | 0        | -0.94818 | 0.209412 | -4.52782 | 1.66E-05 | 0.008748 | 0.437393 |
| ENSG0000 | remission | Inflamed | DDIT4     | protein_cc chr10 | 74033678 | 74035794 | + | 2058 | 2590.625 | 0        | -0.96884 | 0.214722 | -4.51205 | 1.77E-05 | 0.009003 | 0.465232 |
| ENSG0000 | remission | Inflamed | MT-CYB    | protein_cc chrM  | 14747    | 15887    | + | 1141 | 582371.6 | 0        | 0.751809 | 0.166705 | 4.509805 | 1.79E-05 | 0.009003 | 0.469335 |
| ENSG0000 | remission | Inflamed | IL15RA    | protein_cc chr10 | 5990855  | 6020150  | - | 3168 | 1020.833 | 0        | -0.7527  | 0.16706  | -4.50558 | 1.81E-05 | 0.009003 | 0.477155 |
| ENSG0000 | remission | Inflamed | AQP9      | protein_cc chr15 | 58430368 | 58478110 | + | 3235 | 823.1742 | 0.073986 | -3.57876 | 0.796199 | -4.49481 | 1.89E-05 | 0.009157 | 0.497624 |
| ENSG0000 | remission | Inflamed | CCDC175   | protein_cc chr14 | 59971257 | 60043549 | - | 3245 | 5.054893 | 0.329356 | 1.360812 | 0.30296  | 4.491725 | 1.92E-05 | 0.009157 | 0.503653 |
| ENSG0000 | remission | Inflamed | SIL1      | protein_cc chr5  | 1.38E+08 | 1.39E+08 | - | 4011 | 1494.594 | 0        | -0.58007 | 0.129607 | -4.47557 | 2.04E-05 | 0.00945  | 0.536348 |
| ENSG0000 | remission | Inflamed | HCAR3     | protein_cc chr12 | 1.23E+08 | 1.23E+08 | - | 2137 | 822.642  | 0.0358   | -3.43691 | 0.770178 | -4.46249 | 2.15E-05 | 0.00945  | 0.564332 |
| ENSG0000 | remission | Inflamed | CSF3      | protein_cc chr17 | 38171614 | 38174066 | + | 2220 | 562.5227 | 0.124105 | -3.85959 | 0.866722 | -4.45309 | 2.23E-05 | 0.00945  | 0.585299 |
| ENSG0000 | remission | Inflamed | FPR2      | protein_cc chr19 | 52255279 | 52273779 | + | 3700 | 383.5131 | 0.0358   | -2.9817  | 0.669779 | -4.45177 | 2.24E-05 | 0.00945  | 0.588313 |
| ENSG0000 | remission | Inflamed | CLEC4E    | protein_cc chr12 | 8685901  | 8693559  | - | 2422 | 141.1981 | 0.026253 | -2.32987 | 0.523589 | -4.4498  | 2.25E-05 | 0.00945  | 0.592811 |
| ENSG0000 | remission | Inflamed | PSMB9     | protein_cc chr6  | 32811913 | 32827362 | + | 3072 | 2134.874 | 0        | -0.87236 | 0.19611  | -4.44835 | 2.27E-05 | 0.00945  | 0.596159 |
| ENSG0000 | remission | Inflamed | FAM167B   | protein_cc chr1  | 32712834 | 32714457 | + | 936  | 193.5322 | 0        | -1.03929 | 0.233974 | -4.44191 | 2.32E-05 | 0.00945  | 0.611222 |
| ENSG0000 | remission | Inflamed | CHI3L1    | protein_cc chr1  | 2.03E+08 | 2.03E+08 | - | 3408 | 5806.971 | 0.002387 | -3.50614 | 0.790076 | -4.43772 | 2.36E-05 | 0.00945  | 0.621209 |
| ENSG0000 | remission | Inflamed | NLRP12    | protein_cc chr19 | 54296857 | 54327648 | - | 5100 | 70.80907 | 0.02148  | -2.08346 | 0.46989  | -4.43393 | 2.40E-05 | 0.00945  | 0.630387 |
| ENSG0000 | remission | Inflamed | MT-ATP6   | protein_cc chrM  | 8527     | 9207     | + | 681  | 553274.8 | 0        | 0.686614 | 0.154858 | 4.433822 | 2.40E-05 | 0.00945  | 0.630662 |
| ENSG0000 | remission | Inflamed | MT-ND4L   | protein_cc chrM  | 10470    | 10766    | + | 297  | 141014.5 | 0        | 0.702432 | 0.158468 | 4.432645 | 2.41E-05 | 0.00945  | 0.633538 |
| ENSG0000 | remission | Inflamed | RP11-8201 | pseudoger chr17  | 28102765 | 28103719 | - | 955  | 2.264916 | 0.479714 | 0.882056 | 0.199139 | 4.429344 | 2.44E-05 | 0.00945  | 0.64168  |
| ENSG0000 | remission | Inflamed | RP11-290F | lincRNA chr20    | 48884023 | 48896332 | + | 2451 | 238.5823 | 0        | -1.84389 | 0.416325 | -4.42896 | 2.44E-05 | 0.00945  | 0.642628 |
| ENSG0000 | remission | Inflamed | C19orf38  | protein_cc chr19 | 10947251 | 10980466 | + | 1565 | 155.2983 | 0        | -1.32234 | 0.299206 | -4.41949 | 2.54E-05 | 0.009545 | 0.666576 |
| ENSG0000 | remission | Inflamed | CCL3      | protein_cc chr17 | 34415602 | 34417515 | - | 1494 | 408.074  | 0        | -2.1281  | 0.481591 | -4.41888 | 2.54E-05 | 0.009545 | 0.668152 |
| ENSG0000 | remission | Inflamed | NT5DC2    | protein_cc chr3  | 52558386 | 52569070 | - | 4734 | 1943.831 | 0        | -0.87881 | 0.199114 | -4.41362 | 2.59E-05 | 0.009604 | 0.681872 |
| ENSG0000 | remission | Inflamed | RP11-3301 | lincRNA chr2     | 2.2E+08  | 2.2E+08  | - | 456  | 68.11217 | 0        | 1.069152 | 0.243673 | 4.387655 | 2.87E-05 | 0.010235 | 0.753586 |
| ENSG0000 | remission | Inflamed | EMR3      | protein_cc chr19 | 14729929 | 14800839 | - | 2837 | 147.7947 | 0        | -1.89805 | 0.432729 | -4.38624 | 2.88E-05 | 0.010235 | 0.757705 |
| ENSG0000 | remission | Inflamed | IFI35     | protein_cc chr17 | 41158742 | 41166473 | + | 1973 | 1526.986 | 0        | -0.5705  | 0.130127 | -4.38417 | 2.91E-05 | 0.010235 | 0.763749 |
| ENSG0000 | remission | Inflamed | UBE2L6    | protein_cc chr11 | 57319129 | 57335757 | - | 2197 | 2738.088 | 0        | -1.01145 | 0.230966 | -4.37922 | 2.96E-05 | 0.010235 | 0.778428 |
| ENSG0000 | remission | Inflamed | TPST2     | protein_cc chr22 | 26921458 | 26992681 | - | 3448 | 1234.384 | 0        | -0.81118 | 0.185361 | -4.3762  | 3.00E-05 | 0.010235 | 0.787507 |
| ENSG0000 | remission | Inflamed | LRRN2     | protein_cc chr1  | 2.05E+08 | 2.05E+08 | - | 5681 | 610.3294 | 0        | 1.799798 | 0.411645 | 4.372206 | 3.04E-05 | 0.010235 | 0.799659 |
| ENSG0000 | remission | Inflamed | CXCR2     | protein_cc chr2  | 2.19E+08 | 2.19E+08 | + | 3231 | 690.4177 | 0.00716  | -3.08331 | 0.705585 | -4.36986 | 3.07E-05 | 0.010235 | 0.806877 |
| ENSG0000 | remission | Inflamed | MT-TL1    | Mt_trNA chrM     | 3230     | 3304     | + | 75   | 1825.912 | 0        | 1.011396 | 0.231476 | 4.369327 | 3.08E-05 | 0.010235 | 0.808541 |

|          |           |          |           |                  |          |          |   |       |          |          |          |          |          |          |          |          |
|----------|-----------|----------|-----------|------------------|----------|----------|---|-------|----------|----------|----------|----------|----------|----------|----------|----------|
| ENSG0000 | remission | Inflamed | MT-ND4    | protein_cc chrM  | 10760    | 12137    | + | 1378  | 936839   | 0        | 0.714245 | 0.163595 | 4.365931 | 3.12E-05 | 0.010239 | 0.819141 |
| ENSG0000 | remission | Inflamed | LILRA5    | protein_cc chr19 | 54818353 | 54824409 | - | 1762  | 380.7303 | 0        | -1.94393 | 0.447472 | -4.34424 | 3.39E-05 | 0.010988 | 0.890049 |
| ENSG0000 | remission | Inflamed | PADI2     | protein_cc chr1  | 17393256 | 17445948 | - | 6002  | 14448.26 | 0        | 1.938856 | 0.447615 | 4.33153  | 3.55E-05 | 0.011394 | 0.934338 |
| ENSG0000 | remission | Inflamed | EDEM2     | protein_cc chr20 | 33703167 | 33865928 | - | 3380  | 1535.439 | 0        | -0.40374 | 0.093607 | -4.31312 | 3.81E-05 | 0.012075 | 1        |
| ENSG0000 | remission | Inflamed | RP11-396C | lincRNA chr11    | 15723509 | 15780444 | - | 993   | 83.0716  | 0.097852 | 2.110749 | 0.49031  | 4.304924 | 3.93E-05 | 0.012309 | 1        |
| ENSG0000 | remission | Inflamed | IFITM2    | protein_cc chr11 | 307631   | 315272   | + | 1307  | 4973.387 | 0        | -1.41515 | 0.329203 | -4.29872 | 4.03E-05 | 0.012426 | 1        |
| ENSG0000 | remission | Inflamed | SDF2L1    | protein_cc chr22 | 21996550 | 21998587 | + | 1099  | 1467.002 | 0        | -0.83693 | 0.194805 | -4.29625 | 4.06E-05 | 0.012426 | 1        |
| ENSG0000 | remission | Inflamed | HBD       | protein_cc chr11 | 5253908  | 5256600  | - | 1062  | 8.539379 | 0.221957 | -1.46765 | 0.342716 | -4.28241 | 4.28E-05 | 0.012819 | 1        |
| ENSG0000 | remission | Inflamed | CYBA      | protein_cc chr16 | 88709691 | 88717560 | - | 3357  | 9033.723 | 0        | -0.71391 | 0.166813 | -4.27972 | 4.33E-05 | 0.012819 | 1        |
| ENSG0000 | remission | Inflamed | IFITM3    | protein_cc chr11 | 319669   | 327537   | - | 1348  | 11468.4  | 0        | -1.04851 | 0.245215 | -4.27587 | 4.39E-05 | 0.012819 | 1        |
| ENSG0000 | remission | Inflamed | TOR3A     | protein_cc chr1  | 1.79E+08 | 1.79E+08 | + | 3917  | 2074.301 | 0        | -0.59924 | 0.140347 | -4.26971 | 4.50E-05 | 0.012819 | 1        |
| ENSG0000 | remission | Inflamed | REG1A     | protein_cc chr2  | 79347488 | 79350545 | + | 1725  | 18254.48 | 0.00716  | -4.41607 | 1.034422 | -4.26912 | 4.50E-05 | 0.012819 | 1        |
| ENSG0000 | remission | Inflamed | BCL2L1    | protein_cc chr20 | 30252255 | 30311792 | - | 3314  | 4955.94  | 0        | -0.51163 | 0.119964 | -4.26486 | 4.58E-05 | 0.012819 | 1        |
| ENSG0000 | remission | Inflamed | AP001046  | lincRNA chr21    | 44778027 | 44782229 | - | 2798  | 88.71838 | 0.009547 | -1.56486 | 0.367002 | -4.26391 | 4.59E-05 | 0.012819 | 1        |
| ENSG0000 | remission | Inflamed | VNN3      | protein_cc chr6  | 1.33E+08 | 1.33E+08 | - | 3846  | 37.42959 | 0.159905 | -2.14788 | 0.504102 | -4.26081 | 4.65E-05 | 0.012819 | 1        |
| ENSG0000 | remission | Inflamed | SIAH2-AS1 | antisense chr3   | 1.5E+08  | 1.5E+08  | + | 441   | 2.410501 | 0.408115 | 0.705976 | 0.165843 | 4.256895 | 4.72E-05 | 0.012819 | 1        |
| ENSG0000 | remission | Inflamed | IFI30     | protein_cc chr19 | 18283972 | 18288927 | + | 2481  | 819.1885 | 0        | -1.09765 | 0.257867 | -4.25663 | 4.72E-05 | 0.012819 | 1        |
| ENSG0000 | remission | Inflamed | CEBPD     | protein_cc chr8  | 48649471 | 48651648 | - | 2178  | 2404.036 | 0        | -0.89952 | 0.211441 | -4.25422 | 4.77E-05 | 0.012819 | 1        |
| ENSG0000 | remission | Inflamed | CNNM2     | protein_cc chr10 | 1.05E+08 | 1.05E+08 | + | 16324 | 1473.356 | 0        | 0.843562 | 0.198492 | 4.249856 | 4.85E-05 | 0.012819 | 1        |
| ENSG0000 | remission | Inflamed | PRRX2     | protein_cc chr9  | 1.32E+08 | 1.32E+08 | + | 1233  | 97.34845 | 0.002387 | -1.47336 | 0.346832 | -4.24805 | 4.88E-05 | 0.012819 | 1        |
| ENSG0000 | remission | Inflamed | HCAR2     | protein_cc chr12 | 1.23E+08 | 1.23E+08 | - | 2051  | 522.4296 | 0.011933 | -2.78308 | 0.655197 | -4.24769 | 4.88E-05 | 0.012819 | 1        |
| ENSG0000 | remission | Inflamed | AC110619  | pseudoger chr2   | 2.41E+08 | 2.41E+08 | - | 1667  | 11.68496 | 0.212411 | 1.488713 | 0.350655 | 4.245522 | 4.92E-05 | 0.012819 | 1        |
| ENSG0000 | remission | Inflamed | FAM163B   | protein_cc chr9  | 1.36E+08 | 1.36E+08 | - | 811   | 14.49165 | 0.357995 | 1.910035 | 0.450356 | 4.241163 | 5.01E-05 | 0.012867 | 1        |
| ENSG0000 | remission | Inflamed | ENDOD1    | protein_cc chr11 | 94822974 | 94865809 | + | 4687  | 3218.8   | 0        | 1.154346 | 0.272346 | 4.238532 | 5.06E-05 | 0.012867 | 1        |
| ENSG0000 | remission | Inflamed | XBP1      | protein_cc chr22 | 29190543 | 29196585 | - | 3028  | 22224.73 | 0        | -1.01862 | 0.240519 | -4.23507 | 5.12E-05 | 0.012867 | 1        |
| ENSG0000 | remission | Inflamed | FOXP1-IT1 | sense_intr chr3  | 71619406 | 71623608 | - | 3539  | 3.040573 | 0.386635 | 0.911561 | 0.215293 | 4.234057 | 5.14E-05 | 0.012867 | 1        |
| ENSG0000 | remission | Inflamed | CDC25B    | protein_cc chr20 | 3767578  | 3786762  | + | 4149  | 3511.518 | 0        | -0.85203 | 0.201446 | -4.22955 | 5.23E-05 | 0.012867 | 1        |
| ENSG0000 | remission | Inflamed | DRD2      | protein_cc chr11 | 1.13E+08 | 1.13E+08 | - | 4117  | 16.50358 | 0.052506 | 1.193539 | 0.282218 | 4.229139 | 5.24E-05 | 0.012867 | 1        |
| ENSG0000 | remission | Inflamed | PHOSPHO:  | protein_cc chr17 | 47300724 | 47308128 | - | 2375  | 73.46062 | 0.02864  | -2.20804 | 0.522654 | -4.22468 | 5.33E-05 | 0.012867 | 1        |
| ENSG0000 | remission | Inflamed | IGKV2-26  | IG_V_pseu chr2   | 89495584 | 89496317 | - | 343   | 31.88305 | 0.047733 | -1.5773  | 0.373388 | -4.22428 | 5.33E-05 | 0.012867 | 1        |
| ENSG0000 | remission | Inflamed | MAGI1-IT1 | sense_intr chr3  | 65858490 | 65940233 | - | 2567  | 7.680191 | 0.143198 | 1.169699 | 0.277713 | 4.211905 | 5.59E-05 | 0.013357 | 1        |
| ENSG0000 | remission | Inflamed | CCL4      | protein_cc chr17 | 34430983 | 34433014 | + | 2032  | 449.0811 | 0        | -1.67498 | 0.398682 | -4.20129 | 5.82E-05 | 0.013774 | 1        |
| ENSG0000 | remission | Inflamed | OTOP2     | protein_cc chr17 | 72920370 | 72930007 | + | 2778  | 1512.286 | 0.02148  | 3.24085  | 0.771914 | 4.19846  | 5.88E-05 | 0.013797 | 1        |
| ENSG0000 | remission | Inflamed | S100A11   | protein_cc chr1  | 1.52E+08 | 1.52E+08 | - | 680   | 12689.97 | 0        | -0.82673 | 0.197088 | -4.19471 | 5.96E-05 | 0.013843 | 1        |
| ENSG0000 | remission | Inflamed | ARPC1B    | protein_cc chr7  | 98971872 | 98992424 | + | 3979  | 5711.695 | 0        | -0.50779 | 0.121108 | -4.19283 | 6.00E-05 | 0.013843 | 1        |
| ENSG0000 | remission | Inflamed | HLA-DQB1  | protein_cc chr6  | 32627244 | 32636160 | - | 4904  | 3107.112 | 0        | -1.00274 | 0.239603 | -4.18501 | 6.18E-05 | 0.01413  | 1        |
| ENSG0000 | remission | Inflamed | KYNU      | protein_cc chr2  | 1.44E+08 | 1.44E+08 | + | 3070  | 329.8353 | 0        | -2.05154 | 0.491196 | -4.17661 | 6.38E-05 | 0.014262 | 1        |
| ENSG0000 | remission | Inflamed | AC073133  | lincRNA chr7     | 1.56E+08 | 1.56E+08 | - | 432   | 6.539379 | 0.317422 | 1.152591 | 0.276012 | 4.175876 | 6.40E-05 | 0.014262 | 1        |
| ENSG0000 | remission | Inflamed | SEC13     | protein_cc chr3  | 10334815 | 10362862 | - | 5446  | 4716.893 | 0        | -0.34882 | 0.083537 | -4.17563 | 6.40E-05 | 0.014262 | 1        |
| ENSG0000 | remission | Inflamed | PDE6A     | protein_cc chr5  | 1.49E+08 | 1.49E+08 | - | 7414  | 165.7232 | 0.083532 | 2.301396 | 0.552007 | 4.169139 | 6.56E-05 | 0.014349 | 1        |

|          |           |          |           |                  |          |          |   |       |          |          |          |          |          |          |          |   |
|----------|-----------|----------|-----------|------------------|----------|----------|---|-------|----------|----------|----------|----------|----------|----------|----------|---|
| ENSG0000 | remission | Inflamed | CEACAM4   | protein_cc chr19 | 42125344 | 42133442 | - | 1364  | 61.88067 | 0.02148  | -1.63186 | 0.391494 | -4.16829 | 6.58E-05 | 0.014349 | 1 |
| ENSG0000 | remission | Inflamed | GNA15     | protein_cc chr19 | 3136191  | 3163767  | + | 2613  | 803.0692 | 0        | -1.12255 | 0.269373 | -4.16727 | 6.60E-05 | 0.014349 | 1 |
| ENSG0000 | remission | Inflamed | ALPL      | protein_cc chr1  | 21835858 | 21904905 | + | 3014  | 1299.1   | 0        | -1.98064 | 0.475915 | -4.16175 | 6.74E-05 | 0.014527 | 1 |
| ENSG0000 | remission | Inflamed | CHAC1     | protein_cc chr15 | 41245160 | 41248710 | + | 2051  | 337.7088 | 0        | -1.33829 | 0.321747 | -4.15945 | 6.80E-05 | 0.014533 | 1 |
| ENSG0000 | remission | Inflamed | NKG7      | protein_cc chr19 | 51874860 | 51875969 | - | 935   | 417.8496 | 0        | -0.99964 | 0.240833 | -4.15076 | 7.02E-05 | 0.014638 | 1 |
| ENSG0000 | remission | Inflamed | PROK2     | protein_cc chr3  | 71820807 | 71834357 | - | 1612  | 324.9403 | 0.116945 | -3.33477 | 0.803936 | -4.14806 | 7.09E-05 | 0.014638 | 1 |
| ENSG0000 | remission | Inflamed | CKB       | protein_cc chr14 | 1.04E+08 | 1.04E+08 | - | 2669  | 26282.63 | 0        | 1.968112 | 0.474468 | 4.148037 | 7.09E-05 | 0.014638 | 1 |
| ENSG0000 | remission | Inflamed | RAB40B    | protein_cc chr17 | 80612849 | 80656604 | - | 6194  | 803.2124 | 0        | 0.679488 | 0.163894 | 4.145898 | 7.15E-05 | 0.014638 | 1 |
| ENSG0000 | remission | Inflamed | CALN1     | protein_cc chr7  | 71244476 | 71912136 | - | 10029 | 4.494033 | 0.587112 | 1.553338 | 0.374856 | 4.143823 | 7.21E-05 | 0.014638 | 1 |
| ENSG0000 | remission | Inflamed | AC092168  | sense_intr chr2  | 1.01E+08 | 1.01E+08 | + | 717   | 2.847255 | 0.393795 | 0.900283 | 0.217302 | 4.143001 | 7.23E-05 | 0.014638 | 1 |
| ENSG0000 | remission | Inflamed | CRELD2    | protein_cc chr22 | 50311815 | 50321188 | + | 5165  | 2782.222 | 0        | -0.64827 | 0.156489 | -4.14262 | 7.24E-05 | 0.014638 | 1 |
| ENSG0000 | remission | Inflamed | FGR       | protein_cc chr1  | 27938575 | 27961788 | - | 3474  | 1172.723 | 0        | -1.53787 | 0.371713 | -4.13725 | 7.38E-05 | 0.014819 | 1 |
| ENSG0000 | remission | Inflamed | FCRLB     | protein_cc chr1  | 1.62E+08 | 1.62E+08 | + | 2592  | 55.11217 | 0.00716  | -1.41609 | 0.343364 | -4.12415 | 7.75E-05 | 0.015148 | 1 |
| ENSG0000 | remission | Inflamed | RNU6-353  | snRNA chr15      | 43994561 | 43994668 | + | 108   | 1.923628 | 0.565632 | 0.725329 | 0.17592  | 4.123054 | 7.78E-05 | 0.015148 | 1 |
| ENSG0000 | remission | Inflamed | MMP3      | protein_cc chr11 | 1.03E+08 | 1.03E+08 | - | 2048  | 6591.585 | 0        | -3.39246 | 0.822938 | -4.12237 | 7.80E-05 | 0.015148 | 1 |
| ENSG0000 | remission | Inflamed | TYMP      | protein_cc chr22 | 50964181 | 50968485 | - | 3320  | 5059.427 | 0        | -1.13429 | 0.275346 | -4.11949 | 7.89E-05 | 0.015148 | 1 |
| ENSG0000 | remission | Inflamed | RP11-219E | lincRNA chr14    | 21366144 | 21404414 | - | 351   | 3.718377 | 0.587112 | 0.850802 | 0.206599 | 4.118132 | 7.93E-05 | 0.015148 | 1 |
| ENSG0000 | remission | Inflamed | LILRB4    | protein_cc chr19 | 55155340 | 55181810 | + | 6475  | 1117.642 | 0        | -1.29775 | 0.315391 | -4.11472 | 8.03E-05 | 0.015148 | 1 |
| ENSG0000 | remission | Inflamed | C19orf59  | protein_cc chr19 | 7741514  | 7744712  | + | 1906  | 68.80191 | 0.221957 | -2.608   | 0.634024 | -4.1134  | 8.07E-05 | 0.015148 | 1 |
| ENSG0000 | remission | Inflamed | FAM92B    | protein_cc chr16 | 85131965 | 85146114 | - | 1897  | 51.49881 | 0.042959 | -2.02833 | 0.49319  | -4.11267 | 8.09E-05 | 0.015148 | 1 |
| ENSG0000 | remission | Inflamed | AC110619  | protein_cc chr2  | 2.41E+08 | 2.41E+08 | - | 2347  | 25.74702 | 0.088305 | 1.692903 | 0.411667 | 4.112307 | 8.10E-05 | 0.015148 | 1 |
| ENSG0000 | remission | Inflamed | GRINA     | protein_cc chr8  | 1.45E+08 | 1.45E+08 | + | 2527  | 6569.487 | 0        | -0.74245 | 0.180581 | -4.11146 | 8.12E-05 | 0.015148 | 1 |
| ENSG0000 | remission | Inflamed | TESK2     | protein_cc chr1  | 45809555 | 45956872 | - | 3460  | 541.4821 | 0        | 0.509729 | 0.124036 | 4.109528 | 8.18E-05 | 0.01515  | 1 |
| ENSG0000 | remission | Inflamed | SH3GL2    | protein_cc chr9  | 17579080 | 17797127 | + | 2869  | 10.29833 | 0.178998 | 1.095893 | 0.266956 | 4.105151 | 8.32E-05 | 0.015289 | 1 |
| ENSG0000 | remission | Inflamed | CD68      | protein_cc chr17 | 7482785  | 7485429  | + | 2187  | 264.4391 | 0        | -0.6118  | 0.149121 | -4.1027  | 8.39E-05 | 0.015321 | 1 |
| ENSG0000 | remission | Inflamed | ACKR4     | protein_cc chr3  | 1.32E+08 | 1.32E+08 | + | 2273  | 88.51074 | 0.009547 | -1.56476 | 0.381652 | -4.09998 | 8.48E-05 | 0.015369 | 1 |
| ENSG0000 | remission | Inflamed | PIM2      | protein_cc chrX  | 48770459 | 48776301 | - | 2761  | 7614.1   | 0        | -1.55832 | 0.380293 | -4.09768 | 8.55E-05 | 0.015393 | 1 |
| ENSG0000 | remission | Inflamed | RP11-434t | antisense chr2   | 1.44E+08 | 1.44E+08 | - | 884   | 3.668258 | 0.477327 | 1.064951 | 0.260232 | 4.09232  | 8.72E-05 | 0.015588 | 1 |
| ENSG0000 | remission | Inflamed | FCGR1A    | protein_cc chr1  | 1.5E+08  | 1.5E+08  | + | 2998  | 118.0024 | 0.002387 | -1.49402 | 0.365235 | -4.09058 | 8.78E-05 | 0.015588 | 1 |
| ENSG0000 | remission | Inflamed | RP4-742C1 | pseudoger chr22  | 39487591 | 39488860 | + | 640   | 3.842482 | 0.279236 | -0.84899 | 0.207702 | -4.08755 | 8.87E-05 | 0.015595 | 1 |
| ENSG0000 | remission | Inflamed | CTC-5580i | antisense chr5   | 1.68E+08 | 1.68E+08 | + | 3478  | 45.07876 | 0.071599 | 1.789943 | 0.437979 | 4.08682  | 8.90E-05 | 0.015595 | 1 |
| ENSG0000 | remission | Inflamed | ENTPD5    | protein_cc chr14 | 74424713 | 74486102 | - | 10379 | 7916.606 | 0        | 1.422533 | 0.348588 | 4.080839 | 9.10E-05 | 0.015837 | 1 |
| ENSG0000 | remission | Inflamed | ANKH      | protein_cc chr5  | 14704910 | 14871887 | - | 10868 | 3722.637 | 0        | 0.562416 | 0.137902 | 4.078383 | 9.18E-05 | 0.015843 | 1 |
| ENSG0000 | remission | Inflamed | MT-CO1    | protein_cc chrM  | 5904     | 7445     | + | 1542  | 1910545  | 0        | 0.691988 | 0.169723 | 4.077162 | 9.22E-05 | 0.015843 | 1 |
| ENSG0000 | remission | Inflamed | CLEC4D    | protein_cc chr12 | 8662071  | 8674962  | + | 2013  | 31.95465 | 0.26253  | -2.15713 | 0.53024  | -4.06821 | 9.53E-05 | 0.016109 | 1 |
| ENSG0000 | remission | Inflamed | KLK4      | protein_cc chr19 | 51409608 | 51413994 | - | 1935  | 21.04535 | 0.164678 | 1.631726 | 0.401174 | 4.067381 | 9.56E-05 | 0.016109 | 1 |
| ENSG0000 | remission | Inflamed | C6        | protein_cc chr5  | 41142336 | 41261540 | - | 4739  | 11.81384 | 0.162291 | 1.232623 | 0.303054 | 4.067338 | 9.56E-05 | 0.016109 | 1 |
| ENSG0000 | remission | Inflamed | RPS15AP1  | pseudoger chr1   | 45245998 | 45246387 | - | 390   | 9.582339 | 0.214797 | 1.137068 | 0.280389 | 4.055319 | 9.99E-05 | 0.016488 | 1 |
| ENSG0000 | remission | Inflamed | UGT2B10   | protein_cc chr4  | 69681711 | 69696914 | + | 1931  | 4.46778  | 0.491647 | 0.966757 | 0.238424 | 4.054783 | 0.0001   | 0.016488 | 1 |
| ENSG0000 | remission | Inflamed | PLA1A     | protein_cc chr3  | 1.19E+08 | 1.19E+08 | + | 2202  | 133.3294 | 0.004773 | -1.61456 | 0.398208 | -4.05457 | 0.0001   | 0.016488 | 1 |



|          |           |          |           |            |       |          |          |   |      |          |          |          |          |          |          |          |   |
|----------|-----------|----------|-----------|------------|-------|----------|----------|---|------|----------|----------|----------|----------|----------|----------|----------|---|
| ENSG0000 | remission | Inflamed | WNT5A-AS1 | antisense  | chr3  | 55521727 | 55522336 | + | 500  | 2.642005 | 0.479714 | -0.97038 | 0.239387 | -4.0536  | 0.000101 | 0.016488 | 1 |
| ENSG0000 | remission | Inflamed | PSME2P2   | pseudogen  | chr13 | 49345264 | 49345965 | + | 702  | 88.68258 | 0        | -0.62981 | 0.155415 | -4.0524  | 0.000101 | 0.016488 | 1 |
| ENSG0000 | remission | Inflamed | CSF2      | protein_cc | chr5  | 1.31E+08 | 1.31E+08 | + | 783  | 48.97136 | 0.143198 | -2.21451 | 0.547098 | -4.04774 | 0.000103 | 0.016616 | 1 |
| ENSG0000 | remission | Inflamed | RP11-84C1 | antisense  | chr14 | 21463996 | 21467322 | - | 1398 | 12.20048 | 0.360382 | 1.228158 | 0.303695 | 4.044051 | 0.000104 | 0.016616 | 1 |
| ENSG0000 | remission | Inflamed | VSIG10    | protein_cc | chr12 | 1.19E+08 | 1.19E+08 | - | 7060 | 2561.585 | 0        | 1.005186 | 0.248565 | 4.043954 | 0.000104 | 0.016616 | 1 |
| ENSG0000 | remission | Inflamed | SLC11A1   | protein_cc | chr2  | 2.19E+08 | 2.19E+08 | + | 8676 | 689.4368 | 0        | -2.3882  | 0.590723 | -4.04284 | 0.000105 | 0.016616 | 1 |
| ENSG0000 | remission | Inflamed | AC130710  | lincRNA    | chr2  | 16190549 | 16225923 | + | 1330 | 0.868735 | 0.787589 | 0.579182 | 0.143491 | 4.036374 | 0.000107 | 0.016616 | 1 |
| ENSG0000 | remission | Inflamed | HAS1      | protein_cc | chr19 | 52216365 | 52227247 | - | 2241 | 71.40095 | 0.109785 | -2.15489 | 0.533899 | -4.03613 | 0.000107 | 0.016616 | 1 |
| ENSG0000 | remission | Inflamed | ADA       | protein_cc | chr20 | 43248163 | 43280874 | - | 2852 | 407.9666 | 0        | -1.02656 | 0.254513 | -4.03343 | 0.000108 | 0.016616 | 1 |
| ENSG0000 | remission | Inflamed | SLC26A2   | protein_cc | chr5  | 1.49E+08 | 1.49E+08 | + | 8606 | 17142.27 | 0        | 2.360532 | 0.585383 | 4.032456 | 0.000109 | 0.016616 | 1 |
| ENSG0000 | remission | Inflamed | RP6-201G  | lincRNA    | chrX  | 67233312 | 67234743 | - | 1432 | 4.894988 | 0.243437 | 1.052611 | 0.261157 | 4.030567 | 0.000109 | 0.016616 | 1 |
| ENSG0000 | remission | Inflamed | MAFG-AS1  | antisense  | chr17 | 79885705 | 79888629 | + | 1895 | 58.34368 | 0.002387 | -0.77917 | 0.193316 | -4.03053 | 0.000109 | 0.016616 | 1 |
| ENSG0000 | remission | Inflamed | PSMB10    | protein_cc | chr16 | 67968405 | 67970990 | - | 1853 | 1714.859 | 0        | -0.5383  | 0.13358  | -4.0298  | 0.00011  | 0.016616 | 1 |
| ENSG0000 | remission | Inflamed | RP11-680A | antisense  | chr12 | 53692449 | 53694098 | - | 637  | 7.811456 | 0.150358 | -1.24437 | 0.308799 | -4.0297  | 0.00011  | 0.016616 | 1 |
| ENSG0000 | remission | Inflamed | MROH7     | protein_cc | chr1  | 55107463 | 55175939 | + | 9052 | 82.13126 | 0.026253 | 1.715407 | 0.425898 | 4.027737 | 0.000111 | 0.016616 | 1 |
| ENSG0000 | remission | Inflamed | CXCL6     | protein_cc | chr4  | 74702214 | 74714781 | + | 2183 | 1010.165 | 0.004773 | -2.94089 | 0.73026  | -4.02719 | 0.000111 | 0.016616 | 1 |
| ENSG0000 | remission | Inflamed | RP11-243A | lincRNA    | chr16 | 9449445  | 9501950  | + | 5298 | 12.84726 | 0.171838 | 1.424095 | 0.353731 | 4.02593  | 0.000111 | 0.016616 | 1 |
| ENSG0000 | remission | Inflamed | MT-TM     | Mt_tRNA    | chrM  | 4402     | 4469     | + | 68   | 373.3413 | 0        | 1.120017 | 0.278639 | 4.019593 | 0.000114 | 0.016908 | 1 |
| ENSG0000 | remission | Inflamed | BCKDK     | protein_cc | chr16 | 31117428 | 31124110 | + | 3871 | 2062.936 | 0        | -0.43314 | 0.108006 | -4.01033 | 0.000118 | 0.017271 | 1 |
| ENSG0000 | remission | Inflamed | MFSD4     | protein_cc | chr1  | 2.06E+08 | 2.06E+08 | + | 5570 | 1520.668 | 0        | 1.711629 | 0.427097 | 4.007591 | 0.000119 | 0.017271 | 1 |
| ENSG0000 | remission | Inflamed | GOS2      | protein_cc | chr1  | 2.1E+08  | 2.1E+08  | + | 866  | 1130.01  | 0        | -2.23041 | 0.556751 | -4.00612 | 0.00012  | 0.017271 | 1 |
| ENSG0000 | remission | Inflamed | RN7SKP12  | misc_RNA   | chr16 | 29742372 | 29742725 | - | 354  | 26.67064 | 0.27685  | 1.689962 | 0.421908 | 4.005522 | 0.00012  | 0.017271 | 1 |
| ENSG0000 | remission | Inflamed | CHST2     | protein_cc | chr3  | 1.43E+08 | 1.43E+08 | + | 3526 | 1500.232 | 0        | -1.31259 | 0.327717 | -4.00524 | 0.00012  | 0.017271 | 1 |
| ENSG0000 | remission | Inflamed | RP11-253M | sense_intr | chr15 | 69683531 | 69684488 | + | 694  | 3.883055 | 0.336516 | 0.853983 | 0.21325  | 4.004605 | 0.00012  | 0.017271 | 1 |
| ENSG0000 | remission | Inflamed | WNT2      | protein_cc | chr7  | 1.17E+08 | 1.17E+08 | - | 3005 | 114.8115 | 0.312649 | -2.77007 | 0.692922 | -3.99766 | 0.000123 | 0.017278 | 1 |
| ENSG0000 | remission | Inflamed | KCNJ15    | protein_cc | chr21 | 39529128 | 39679279 | + | 9685 | 223.6158 | 0.069212 | -2.61968 | 0.65533  | -3.99749 | 0.000123 | 0.017278 | 1 |
| ENSG0000 | remission | Inflamed | LINC00923 | protein_cc | chr15 | 98285448 | 98417780 | - | 2342 | 3.589499 | 0.389021 | 0.907471 | 0.227015 | 3.9974   | 0.000123 | 0.017278 | 1 |
| ENSG0000 | remission | Inflamed | EMX1      | protein_cc | chr2  | 73143389 | 73162020 | + | 3721 | 12.63962 | 0.210024 | 1.301019 | 0.325765 | 3.993733 | 0.000125 | 0.017278 | 1 |
| ENSG0000 | remission | Inflamed | ISG15     | protein_cc | chr1  | 948803   | 949920   | + | 711  | 970.6301 | 0        | -0.98053 | 0.245594 | -3.99246 | 0.000126 | 0.017278 | 1 |
| ENSG0000 | remission | Inflamed | THRB-IT1  | sense_intr | chr3  | 24496627 | 24500925 | - | 1754 | 1.155131 | 0.742243 | 0.616628 | 0.154457 | 3.992244 | 0.000126 | 0.017278 | 1 |
| ENSG0000 | remission | Inflamed | FOXD2-AS1 | antisense  | chr1  | 47897805 | 47900313 | - | 2509 | 512.9499 | 0        | 0.996873 | 0.249743 | 3.991602 | 0.000126 | 0.017278 | 1 |
| ENSG0000 | remission | Inflamed | DNAJB7    | protein_cc | chr22 | 41255553 | 41258130 | - | 2578 | 3.279236 | 0.501193 | 0.872823 | 0.21875  | 3.990051 | 0.000127 | 0.017278 | 1 |
| ENSG0000 | remission | Inflamed | SAA2      | protein_cc | chr11 | 18260770 | 18270190 | - | 2227 | 255.1599 | 0.100239 | -3.03431 | 0.760522 | -3.98977 | 0.000127 | 0.017278 | 1 |
| ENSG0000 | remission | Inflamed | TCN1      | protein_cc | chr11 | 59620273 | 59634048 | - | 1586 | 377.2959 | 0.112172 | -2.91913 | 0.732248 | -3.98654 | 0.000128 | 0.017278 | 1 |
| ENSG0000 | remission | Inflamed | VSTM2A    | protein_cc | chr7  | 54610018 | 54638773 | + | 5967 | 212.6754 | 0.038186 | 2.504034 | 0.628144 | 3.986402 | 0.000128 | 0.017278 | 1 |
| ENSG0000 | remission | Inflamed | NFE2      | protein_cc | chr12 | 54685895 | 54694905 | - | 2469 | 159.4487 | 0.011933 | -2.14935 | 0.539312 | -3.98536 | 0.000129 | 0.017278 | 1 |
| ENSG0000 | remission | Inflamed | VMO1      | protein_cc | chr17 | 4688580  | 4689728  | - | 803  | 83.21718 | 0        | -1.14029 | 0.286134 | -3.98515 | 0.000129 | 0.017278 | 1 |
| ENSG0000 | remission | Inflamed | GLRA2     | protein_cc | chrX  | 14547420 | 14749934 | + | 3713 | 33.30549 | 0.188544 | 2.232902 | 0.56044  | 3.984194 | 0.000129 | 0.017278 | 1 |
| ENSG0000 | remission | Inflamed | CAPN13    | protein_cc | chr2  | 30945637 | 31043408 | - | 5203 | 624.2768 | 0.004773 | 2.168018 | 0.544592 | 3.980996 | 0.000131 | 0.017391 | 1 |
| ENSG0000 | remission | Inflamed | S100A12   | protein_cc | chr1  | 1.53E+08 | 1.53E+08 | - | 516  | 126.5871 | 0.24105  | -2.77768 | 0.698577 | -3.9762  | 0.000133 | 0.017607 | 1 |

|          |           |          |           |                  |          |          |   |       |          |          |          |          |          |          |          |   |
|----------|-----------|----------|-----------|------------------|----------|----------|---|-------|----------|----------|----------|----------|----------|----------|----------|---|
| ENSG0000 | remission | Inflamed | SELE      | protein_cc chr1  | 1.7E+08  | 1.7E+08  | - | 4586  | 368.895  | 0.02148  | -2.78057 | 0.699613 | -3.97444 | 0.000134 | 0.017631 | 1 |
| ENSG0000 | remission | Inflamed | FCGR2A    | protein_cc chr1  | 1.61E+08 | 1.61E+08 | + | 5314  | 2114.695 | 0        | -1.41122 | 0.355299 | -3.97193 | 0.000135 | 0.017683 | 1 |
| ENSG0000 | remission | Inflamed | THRB      | protein_cc chr3  | 24158651 | 24536773 | - | 8709  | 458.2816 | 0.002387 | 1.421305 | 0.357932 | 3.970881 | 0.000136 | 0.017683 | 1 |
| ENSG0000 | remission | Inflamed | CTSB      | protein_cc chr8  | 11700033 | 11726957 | - | 7438  | 37894.52 | 0        | -0.6879  | 0.173378 | -3.96765 | 0.000137 | 0.017802 | 1 |
| ENSG0000 | remission | Inflamed | CWH43     | protein_cc chr4  | 48988264 | 49064098 | + | 3138  | 625.0095 | 0.019093 | 2.419605 | 0.610415 | 3.963868 | 0.000139 | 0.017959 | 1 |
| ENSG0000 | remission | Inflamed | BST2      | protein_cc chr19 | 17513748 | 17516457 | - | 1119  | 1592.995 | 0        | -0.95006 | 0.23994  | -3.95959 | 0.000142 | 0.01815  | 1 |
| ENSG0000 | remission | Inflamed | NCF4      | protein_cc chr22 | 37257030 | 37274057 | + | 1759  | 1365.578 | 0        | -0.86004 | 0.217417 | -3.95571 | 0.000144 | 0.018317 | 1 |
| ENSG0000 | remission | Inflamed | TRPM6     | protein_cc chr9  | 77337411 | 77503010 | - | 9287  | 1812.153 | 0.002387 | 2.133156 | 0.539485 | 3.954061 | 0.000144 | 0.018337 | 1 |
| ENSG0000 | remission | Inflamed | P2RY6     | protein_cc chr11 | 72975550 | 73009662 | + | 3976  | 454.9928 | 0        | -0.89221 | 0.226042 | -3.94708 | 0.000148 | 0.018714 | 1 |
| ENSG0000 | remission | Inflamed | RP11-386C | antisense chr12  | 49392150 | 49412988 | + | 2208  | 13.01432 | 0.02864  | -0.98713 | 0.250344 | -3.94308 | 0.00015  | 0.01879  | 1 |
| ENSG0000 | remission | Inflamed | RGS16     | protein_cc chr1  | 1.83E+08 | 1.83E+08 | - | 2427  | 281.432  | 0.002387 | -1.41328 | 0.358461 | -3.94265 | 0.00015  | 0.01879  | 1 |
| ENSG0000 | remission | Inflamed | CTD-2054I | pseudoger chr15  | 1E+08    | 1E+08    | + | 739   | 0.854415 | 0.794749 | 0.534517 | 0.135618 | 3.941351 | 0.000151 | 0.01879  | 1 |
| ENSG0000 | remission | Inflamed | INTS4L1   | pseudoger chr7   | 64601603 | 64694600 | + | 2553  | 10.88544 | 0.186158 | 1.077419 | 0.27351  | 3.939227 | 0.000152 | 0.01879  | 1 |
| ENSG0000 | remission | Inflamed | Y1F1B     | protein_cc chr19 | 38795753 | 38807913 | - | 3184  | 1170.442 | 0        | -0.54011 | 0.137205 | -3.9365  | 0.000154 | 0.01879  | 1 |
| ENSG0000 | remission | Inflamed | GLP2R     | protein_cc chr17 | 9725523  | 9795419  | + | 6052  | 351.895  | 0        | 1.340628 | 0.3406   | 3.936075 | 0.000154 | 0.01879  | 1 |
| ENSG0000 | remission | Inflamed | CPNE9     | protein_cc chr3  | 9745491  | 9771592  | + | 2332  | 4.078759 | 0.171838 | -0.79868 | 0.202952 | -3.93531 | 0.000154 | 0.01879  | 1 |
| ENSG0000 | remission | Inflamed | IL17A     | protein_cc chr6  | 52051185 | 52055436 | + | 1859  | 51.1432  | 0.143198 | -1.91863 | 0.487715 | -3.93392 | 0.000155 | 0.01879  | 1 |
| ENSG0000 | remission | Inflamed | RNU6-343  | snRNA chr12      | 56982302 | 56982405 | + | 104   | 2.047733 | 0.453461 | 0.738766 | 0.187814 | 3.933495 | 0.000155 | 0.01879  | 1 |
| ENSG0000 | remission | Inflamed | RNF125    | protein_cc chr18 | 29598335 | 29653176 | + | 6508  | 660.4821 | 0        | 0.965671 | 0.245536 | 3.932919 | 0.000156 | 0.01879  | 1 |
| ENSG0000 | remission | Inflamed | DNASE2B   | protein_cc chr1  | 84864215 | 84880701 | + | 1476  | 9.720764 | 0.088305 | 1.025783 | 0.260926 | 3.931315 | 0.000157 | 0.01881  | 1 |
| ENSG0000 | remission | Inflamed | HAVCR1    | protein_cc chr5  | 1.56E+08 | 1.56E+08 | - | 2151  | 78.06444 | 0.045346 | 1.632367 | 0.415457 | 3.929086 | 0.000158 | 0.01881  | 1 |
| ENSG0000 | remission | Inflamed | AMACR     | protein_cc chr5  | 33986283 | 34008220 | - | 4845  | 264.0501 | 0        | 0.903483 | 0.229963 | 3.928814 | 0.000158 | 0.01881  | 1 |
| ENSG0000 | remission | Inflamed | HMGCS2    | protein_cc chr1  | 1.2E+08  | 1.2E+08  | - | 2571  | 14553.19 | 0        | 2.755349 | 0.70171  | 3.926621 | 0.000159 | 0.018873 | 1 |
| ENSG0000 | remission | Inflamed | RND1      | protein_cc chr12 | 49250928 | 49259681 | - | 3099  | 411.1241 | 0.002387 | -1.27394 | 0.32482  | -3.92199 | 0.000162 | 0.019104 | 1 |
| ENSG0000 | remission | Inflamed | PPARGC1A  | protein_cc chr4  | 23756664 | 23905712 | - | 10511 | 583.7733 | 0        | 1.463403 | 0.374282 | 3.909895 | 0.000169 | 0.019862 | 1 |
| ENSG0000 | remission | Inflamed | LINC00032 | lincRNA chr9     | 27245682 | 27282791 | - | 2913  | 5.01432  | 0.245823 | 0.929165 | 0.237851 | 3.906494 | 0.000171 | 0.020016 | 1 |
| ENSG0000 | remission | Inflamed | RP11-285E | lincRNA chr17    | 75260262 | 75260858 | - | 597   | 3.252983 | 0.362768 | 0.879354 | 0.225328 | 3.902542 | 0.000174 | 0.020211 | 1 |
| ENSG0000 | remission | Inflamed | REG1B     | protein_cc chr2  | 79312156 | 79315145 | - | 2384  | 3166.057 | 0.107399 | -4.29166 | 1.100512 | -3.8997  | 0.000176 | 0.020293 | 1 |
| ENSG0000 | remission | Inflamed | ELOVL3    | protein_cc chr10 | 1.04E+08 | 1.04E+08 | + | 1371  | 7.99284  | 0.138425 | -1.12278 | 0.287971 | -3.89895 | 0.000176 | 0.020293 | 1 |
| ENSG0000 | remission | Inflamed | TNFRSF10C | protein_cc chr8  | 22941868 | 22974950 | + | 2625  | 448.0119 | 0        | -1.89532 | 0.486534 | -3.89555 | 0.000178 | 0.020338 | 1 |
| ENSG0000 | remission | Inflamed | RPL10L    | protein_cc chr14 | 47120222 | 47121028 | - | 807   | 19.14081 | 0.107399 | 1.361791 | 0.349673 | 3.894471 | 0.000179 | 0.020338 | 1 |
| ENSG0000 | remission | Inflamed | KRT6B     | protein_cc chr12 | 52840435 | 52845910 | - | 2282  | 280.5084 | 0.119332 | -2.80444 | 0.720272 | -3.89359 | 0.000179 | 0.020338 | 1 |
| ENSG0000 | remission | Inflamed | BEST4     | protein_cc chr1  | 45249257 | 45253377 | - | 2047  | 1951.439 | 0        | 2.49203  | 0.640472 | 3.890928 | 0.000181 | 0.020338 | 1 |
| ENSG0000 | remission | Inflamed | KISS1R    | protein_cc chr19 | 917287   | 921015   | + | 1680  | 9.374702 | 0.140811 | -1.21428 | 0.312174 | -3.88974 | 0.000182 | 0.020338 | 1 |
| ENSG0000 | remission | Inflamed | GPX7      | protein_cc chr1  | 53068044 | 53074723 | + | 1691  | 214.8568 | 0        | -1.04072 | 0.267603 | -3.88906 | 0.000182 | 0.020338 | 1 |
| ENSG0000 | remission | Inflamed | RIMKLA    | protein_cc chr1  | 42846466 | 42888249 | + | 8981  | 735.8401 | 0        | 1.371177 | 0.352723 | 3.88741  | 0.000183 | 0.020338 | 1 |
| ENSG0000 | remission | Inflamed | APOBEC3A  | protein_cc chr22 | 39348746 | 39359188 | + | 2010  | 296.2936 | 0.004773 | -2.30156 | 0.592199 | -3.88647 | 0.000184 | 0.020338 | 1 |
| ENSG0000 | remission | Inflamed | RP11-104J | antisense chr17  | 34328458 | 34338658 | + | 1920  | 7.961814 | 0.181384 | 1.081625 | 0.278395 | 3.885219 | 0.000185 | 0.020338 | 1 |
| ENSG0000 | remission | Inflamed | COTL1     | protein_cc chr16 | 84599200 | 84651683 | - | 6742  | 8011.95  | 0        | -0.63048 | 0.162338 | -3.88373 | 0.000186 | 0.020338 | 1 |
| ENSG0000 | remission | Inflamed | KLKP1     | pseudoger chr19  | 51385352 | 51399654 | - | 1912  | 1.408115 | 0.75179  | 0.591744 | 0.152378 | 3.883408 | 0.000186 | 0.020338 | 1 |

|          |           |          |           |                  |          |          |   |       |          |          |          |          |          |          |          |   |
|----------|-----------|----------|-----------|------------------|----------|----------|---|-------|----------|----------|----------|----------|----------|----------|----------|---|
| ENSG0000 | remission | Inflamed | MMP10     | protein_cc chr11 | 1.03E+08 | 1.03E+08 | - | 1758  | 597.673  | 0.009547 | -2.62872 | 0.677015 | -3.88281 | 0.000186 | 0.020338 | 1 |
| ENSG0000 | remission | Inflamed | NBPF1     | protein_cc chr1  | 16888814 | 16940057 | - | 12212 | 3064.723 | 0        | 0.953161 | 0.245649 | 3.880173 | 0.000188 | 0.020338 | 1 |
| ENSG0000 | remission | Inflamed | IL37      | protein_cc chr2  | 1.14E+08 | 1.14E+08 | + | 839   | 7.071599 | 0.221957 | 1.150752 | 0.296642 | 3.879267 | 0.000189 | 0.020338 | 1 |
| ENSG0000 | remission | Inflamed | LILRA2    | protein_cc chr19 | 55084387 | 55099027 | + | 2622  | 162.8401 | 0.004773 | -1.73558 | 0.447674 | -3.87688 | 0.00019  | 0.020338 | 1 |
| ENSG0000 | remission | Inflamed | IL13RA2   | protein_cc chrX  | 1.14E+08 | 1.14E+08 | - | 1626  | 164.5179 | 0.019093 | -2.38243 | 0.614644 | -3.87611 | 0.000191 | 0.020338 | 1 |
| ENSG0000 | remission | Inflamed | LY96      | protein_cc chr8  | 74903587 | 74941322 | + | 607   | 156.7828 | 0        | -1.34961 | 0.348189 | -3.87608 | 0.000191 | 0.020338 | 1 |
| ENSG0000 | remission | Inflamed | ADRA1B    | protein_cc chr5  | 1.59E+08 | 1.59E+08 | + | 1738  | 14.68258 | 0.054893 | 1.167214 | 0.301221 | 3.874948 | 0.000192 | 0.020338 | 1 |
| ENSG0000 | remission | Inflamed | ZNF704    | protein_cc chr8  | 81540686 | 81787016 | - | 15008 | 939.1862 | 0        | 1.325971 | 0.342298 | 3.873729 | 0.000193 | 0.020338 | 1 |
| ENSG0000 | remission | Inflamed | SLC7A7    | protein_cc chr14 | 23242431 | 23299029 | - | 5131  | 1306.236 | 0        | -0.74451 | 0.192196 | -3.87372 | 0.000193 | 0.020338 | 1 |
| ENSG0000 | remission | Inflamed | CSMD3     | protein_cc chr8  | 1.13E+08 | 1.14E+08 | - | 20567 | 3.909308 | 0.494033 | 0.954699 | 0.24646  | 3.873645 | 0.000193 | 0.020338 | 1 |
| ENSG0000 | remission | Inflamed | OR5G5P    | pseudoger chr11  | 56569332 | 56587184 | - | 1081  | 3.147971 | 0.534606 | 0.880679 | 0.227441 | 3.872127 | 0.000194 | 0.020366 | 1 |
| ENSG0000 | remission | Inflamed | RP11-143k | processed_chr17  | 71161116 | 71192732 | + | 588   | 1.114558 | 0.732697 | 0.549317 | 0.141993 | 3.86861  | 0.000196 | 0.020407 | 1 |
| ENSG0000 | remission | Inflamed | CDHR1     | protein_cc chr10 | 85954410 | 85979377 | + | 6189  | 3671.399 | 0        | 2.532095 | 0.654698 | 3.867576 | 0.000197 | 0.020407 | 1 |
| ENSG0000 | remission | Inflamed | ICAM3     | protein_cc chr19 | 10444452 | 10450499 | - | 2950  | 2064.184 | 0        | -0.96958 | 0.250698 | -3.86755 | 0.000197 | 0.020407 | 1 |
| ENSG0000 | remission | Inflamed | ROPN1L    | protein_cc chr5  | 10441636 | 10472141 | + | 1817  | 12.76134 | 0.159905 | -1.34897 | 0.348831 | -3.8671  | 0.000197 | 0.020407 | 1 |
| ENSG0000 | remission | Inflamed | RN7SL67P  | misc_RNA chr12   | 19456414 | 19456710 | + | 297   | 0.789976 | 0.792363 | 0.528488 | 0.136713 | 3.86568  | 0.000198 | 0.02043  | 1 |
| ENSG0000 | remission | Inflamed | RP11-467L | pseudoger chr12  | 31907651 | 31908055 | + | 405   | 11.34606 | 0.062053 | -1.03161 | 0.267072 | -3.86267 | 0.0002   | 0.020485 | 1 |
| ENSG0000 | remission | Inflamed | RP11-61L1 | sense_intr chr18 | 9506240  | 9509724  | + | 3485  | 4.785203 | 0.274463 | 0.941099 | 0.243659 | 3.862361 | 0.000201 | 0.020485 | 1 |
| ENSG0000 | remission | Inflamed | AP000344  | lincRNA chr22    | 23775751 | 23777258 | + | 1083  | 28.17422 | 0.109785 | 1.39858  | 0.362399 | 3.85923  | 0.000203 | 0.020485 | 1 |
| ENSG0000 | remission | Inflamed | ROPN1     | protein_cc chr3  | 1.24E+08 | 1.24E+08 | - | 4395  | 4.167064 | 0.494033 | 0.911585 | 0.236239 | 3.858748 | 0.000203 | 0.020485 | 1 |
| ENSG0000 | remission | Inflamed | CTB-43E15 | lincRNA chr5     | 1.73E+08 | 1.73E+08 | - | 1839  | 9.661098 | 0.329356 | -1.51867 | 0.39383  | -3.85616 | 0.000205 | 0.020485 | 1 |
| ENSG0000 | remission | Inflamed | C2CD4A    | protein_cc chr15 | 62359176 | 62363116 | + | 3445  | 350.7518 | 0.004773 | -1.64374 | 0.426454 | -3.85444 | 0.000206 | 0.020485 | 1 |
| ENSG0000 | remission | Inflamed | FSIP1     | protein_cc chr15 | 39892232 | 40075031 | - | 2951  | 28.15752 | 0.019093 | 1.198371 | 0.310933 | 3.854116 | 0.000206 | 0.020485 | 1 |
| ENSG0000 | remission | Inflamed | IGKV1-37  | IG_V_gene chr2   | 89597021 | 89597542 | - | 398   | 12.03341 | 0.131265 | -1.40431 | 0.364396 | -3.8538  | 0.000207 | 0.020485 | 1 |
| ENSG0000 | remission | Inflamed | DAO       | protein_cc chr12 | 1.09E+08 | 1.09E+08 | + | 3883  | 48.63484 | 0.088305 | 1.618912 | 0.420103 | 3.853609 | 0.000207 | 0.020485 | 1 |
| ENSG0000 | remission | Inflamed | RP11-310E | antisense chr10  | 96988000 | 96990901 | - | 663   | 1.205251 | 0.658711 | 0.616614 | 0.160041 | 3.852845 | 0.000207 | 0.020485 | 1 |
| ENSG0000 | remission | Inflamed | TMEM110   | protein_cc chr3  | 52870235 | 52931612 | - | 5730  | 96.34368 | 0        | -0.3731  | 0.0969   | -3.85036 | 0.000209 | 0.020485 | 1 |
| ENSG0000 | remission | Inflamed | SLC7A5    | protein_cc chr16 | 87863629 | 87903094 | - | 4745  | 2536.912 | 0        | -1.28911 | 0.334852 | -3.84978 | 0.00021  | 0.020485 | 1 |
| ENSG0000 | remission | Inflamed | RP11-142C | sense_intr chr17 | 29460200 | 29465536 | + | 2780  | 0.957041 | 0.749403 | 0.53015  | 0.137722 | 3.849424 | 0.00021  | 0.020485 | 1 |
| ENSG0000 | remission | Inflamed | FCN1      | protein_cc chr9  | 1.38E+08 | 1.38E+08 | - | 1286  | 480.4439 | 0.002387 | -1.96804 | 0.511255 | -3.84942 | 0.00021  | 0.020485 | 1 |
| ENSG0000 | remission | Inflamed | RP11-781F | antisense chr18  | 6954676  | 6957418  | + | 2295  | 3.656325 | 0.463007 | 0.891553 | 0.231684 | 3.848143 | 0.000211 | 0.020485 | 1 |
| ENSG0000 | remission | Inflamed | OAF       | protein_cc chr11 | 1.2E+08  | 1.2E+08  | + | 3176  | 4747.659 | 0        | 0.675687 | 0.175604 | 3.847798 | 0.000211 | 0.020485 | 1 |
| ENSG0000 | remission | Inflamed | RP11-452I | pseudoger chr14  | 52753515 | 52755986 | + | 1949  | 17.47494 | 0.138425 | 1.433911 | 0.372895 | 3.845351 | 0.000213 | 0.020518 | 1 |
| ENSG0000 | remission | Inflamed | FOXQ1     | protein_cc chr6  | 1312675  | 1314992  | + | 2318  | 307.1718 | 0.002387 | -1.41676 | 0.368441 | -3.84527 | 0.000213 | 0.020518 | 1 |
| ENSG0000 | remission | Inflamed | RP11-266E | lincRNA chr12    | 1.06E+08 | 1.06E+08 | + | 2586  | 6.735084 | 0.403341 | 1.353094 | 0.352288 | 3.840874 | 0.000216 | 0.020764 | 1 |
| ENSG0000 | remission | Inflamed | RP13-497k | antisense chr4   | 23781213 | 23784183 | + | 442   | 24.53699 | 0.23389  | 1.91055  | 0.498068 | 3.835926 | 0.00022  | 0.021027 | 1 |
| ENSG0000 | remission | Inflamed | CTC-338M  | lincRNA chr5     | 1.81E+08 | 1.81E+08 | + | 549   | 1.558473 | 0.613365 | 0.656007 | 0.171066 | 3.834809 | 0.000221 | 0.021027 | 1 |
| ENSG0000 | remission | Inflamed | RP11-285C | lincRNA chr10    | 45432956 | 45451173 | + | 425   | 3.491647 | 0.486874 | 0.865087 | 0.225622 | 3.834239 | 0.000222 | 0.021027 | 1 |
| ENSG0000 | remission | Inflamed | RP11-263k | lincRNA chr12    | 82906456 | 82909596 | + | 3141  | 0.906921 | 0.787589 | 0.570271 | 0.148834 | 3.831585 | 0.000224 | 0.021149 | 1 |
| ENSG0000 | remission | Inflamed | LINC00152 | lincRNA chr2     | 87754887 | 87906324 | + | 3125  | 244.3461 | 0        | -1.31666 | 0.344151 | -3.8258  | 0.000228 | 0.021418 | 1 |

|          |           |          |           |                  |          |          |   |       |          |          |          |          |          |          |          |   |
|----------|-----------|----------|-----------|------------------|----------|----------|---|-------|----------|----------|----------|----------|----------|----------|----------|---|
| ENSG0000 | remission | Inflamed | ZC3H12A   | protein_cc chr1  | 37940153 | 37949980 | + | 3117  | 4171.401 | 0        | -0.96631 | 0.252757 | -3.82307 | 0.00023  | 0.021418 | 1 |
| ENSG0000 | remission | Inflamed | ME3       | protein_cc chr11 | 86152150 | 86383678 | - | 3838  | 662.2005 | 0        | 0.575154 | 0.150458 | 3.822697 | 0.000231 | 0.021418 | 1 |
| ENSG0000 | remission | Inflamed | NR6A1     | protein_cc chr9  | 1.27E+08 | 1.28E+08 | - | 7124  | 428.1575 | 0        | 1.005091 | 0.262996 | 3.821701 | 0.000232 | 0.021418 | 1 |
| ENSG0000 | remission | Inflamed | DHRS7C    | protein_cc chr17 | 9674751  | 9694614  | - | 1006  | 14.76611 | 0.140811 | 1.579345 | 0.413323 | 3.821092 | 0.000232 | 0.021418 | 1 |
| ENSG0000 | remission | Inflamed | RN7SL728l | misc_RNA chr4    | 1.03E+08 | 1.03E+08 | - | 298   | 1.119332 | 0.713604 | 0.530684 | 0.138904 | 3.820516 | 0.000233 | 0.021418 | 1 |
| ENSG0000 | remission | Inflamed | MIR4435-1 | lincRNA chr2     | 1.12E+08 | 1.12E+08 | - | 8500  | 381.7733 | 0        | -1.02958 | 0.269506 | -3.82027 | 0.000233 | 0.021418 | 1 |
| ENSG0000 | remission | Inflamed | FRMD1     | protein_cc chr6  | 1.68E+08 | 1.68E+08 | - | 5788  | 1189.621 | 0.00716  | 2.203411 | 0.576848 | 3.819742 | 0.000233 | 0.021418 | 1 |
| ENSG0000 | remission | Inflamed | AC005336  | pseudoger chr19  | 16021392 | 16022634 | - | 1243  | 48.05967 | 0.207637 | 1.487283 | 0.389517 | 3.818276 | 0.000234 | 0.021418 | 1 |
| ENSG0000 | remission | Inflamed | SEMA3E    | protein_cc chr7  | 82993222 | 83278326 | - | 6748  | 19.59189 | 0.095465 | 1.397037 | 0.365907 | 3.81801  | 0.000235 | 0.021418 | 1 |
| ENSG0000 | remission | Inflamed | IL27      | protein_cc chr16 | 28510683 | 28523372 | - | 1270  | 12.62291 | 0.155131 | -1.2727  | 0.333648 | -3.8145  | 0.000238 | 0.02161  | 1 |
| ENSG0000 | remission | Inflamed | PTAFR     | protein_cc chr1  | 28473677 | 28520447 | - | 4706  | 1972.103 | 0        | -1.0693  | 0.280474 | -3.81248 | 0.000239 | 0.02169  | 1 |
| ENSG0000 | remission | Inflamed | RP11-491F | antisense chr16  | 49321341 | 49324138 | + | 654   | 7.933174 | 0.145585 | 0.940005 | 0.246651 | 3.811076 | 0.00024  | 0.021722 | 1 |
| ENSG0000 | remission | Inflamed | GPR84     | protein_cc chr12 | 54756229 | 54758271 | - | 2043  | 132.6778 | 0.002387 | -1.87054 | 0.491188 | -3.8082  | 0.000243 | 0.021768 | 1 |
| ENSG0000 | remission | Inflamed | RP11-405C | sense_intr chr6  | 7183316  | 7185520  | + | 1676  | 5.112172 | 0.229117 | 0.975357 | 0.256182 | 3.807277 | 0.000244 | 0.021768 | 1 |
| ENSG0000 | remission | Inflamed | NCF1      | protein_cc chr7  | 74188309 | 74203659 | + | 3462  | 712.105  | 0        | -1.14458 | 0.300685 | -3.80657 | 0.000244 | 0.021768 | 1 |
| ENSG0000 | remission | Inflamed | CSF3R     | protein_cc chr1  | 36931644 | 36948879 | - | 8426  | 3825.513 | 0        | -2.10915 | 0.554119 | -3.80632 | 0.000244 | 0.021768 | 1 |
| ENSG0000 | remission | Inflamed | FLOT1     | protein_cc chr6  | 30695486 | 30710510 | - | 3186  | 5117.547 | 0        | -0.34308 | 0.090151 | -3.80565 | 0.000245 | 0.021768 | 1 |
| ENSG0000 | remission | Inflamed | MMP7      | protein_cc chr11 | 1.02E+08 | 1.02E+08 | - | 2323  | 569.074  | 0.095465 | -3.10608 | 0.816567 | -3.80383 | 0.000247 | 0.021804 | 1 |
| ENSG0000 | remission | Inflamed | IGKV3OR2  | IG_V_gene chr2   | 87565634 | 87566158 | + | 350   | 71.0358  | 0.033413 | -1.84966 | 0.486337 | -3.80325 | 0.000247 | 0.021804 | 1 |
| ENSG0000 | remission | Inflamed | RP11-545A | pseudoger chr1   | 1.8E+08  | 1.8E+08  | + | 2471  | 8.844869 | 0.116945 | 0.985017 | 0.259376 | 3.797645 | 0.000252 | 0.022165 | 1 |
| ENSG0000 | remission | Inflamed | HCK       | protein_cc chr20 | 30639991 | 30689659 | + | 3092  | 1886.279 | 0        | -1.04553 | 0.275564 | -3.79414 | 0.000255 | 0.022364 | 1 |
| ENSG0000 | remission | Inflamed | CDC42EP2  | protein_cc chr11 | 65082289 | 65089900 | + | 2452  | 1030.389 | 0        | -0.81381 | 0.214551 | -3.7931  | 0.000256 | 0.022367 | 1 |
| ENSG0000 | remission | Inflamed | DLG2      | protein_cc chr11 | 83166055 | 85338966 | - | 16089 | 28.58234 | 0.026253 | 1.08468  | 0.286066 | 3.791712 | 0.000257 | 0.022367 | 1 |
| ENSG0000 | remission | Inflamed | LILRB2    | protein_cc chr19 | 54777675 | 54785039 | - | 3810  | 1210.205 | 0        | -1.33444 | 0.351976 | -3.79128 | 0.000258 | 0.022367 | 1 |
| ENSG0000 | remission | Inflamed | IL2RA     | protein_cc chr10 | 6052652  | 6104288  | - | 3176  | 535.1193 | 0        | -1.33714 | 0.352929 | -3.7887  | 0.00026  | 0.022496 | 1 |
| ENSG0000 | remission | Inflamed | RP11-797A | lincRNA chr15    | 77334178 | 77335533 | - | 1356  | 40.75418 | 0.004773 | 0.930651 | 0.246003 | 3.783083 | 0.000265 | 0.022869 | 1 |
| ENSG0000 | remission | Inflamed | FCAR      | protein_cc chr19 | 55385704 | 55401838 | + | 2366  | 97.68735 | 0.202864 | -2.43021 | 0.642825 | -3.78051 | 0.000268 | 0.022977 | 1 |
| ENSG0000 | remission | Inflamed | CD300LF   | protein_cc chr17 | 72690452 | 72709117 | - | 2159  | 320.673  | 0        | -0.81308 | 0.215111 | -3.77979 | 0.000268 | 0.022977 | 1 |
| ENSG0000 | remission | Inflamed | CLDN14    | protein_cc chr21 | 37832919 | 37948867 | - | 2853  | 37.84964 | 0.057279 | -1.43018 | 0.378461 | -3.77895 | 0.000269 | 0.022977 | 1 |
| ENSG0000 | remission | Inflamed | SAA1      | protein_cc chr11 | 18287721 | 18291524 | + | 765   | 545.8831 | 0.052506 | -3.0784  | 0.814863 | -3.77781 | 0.00027  | 0.022994 | 1 |
| ENSG0000 | remission | Inflamed | MRPL28    | protein_cc chr16 | 417384   | 420527   | - | 2404  | 1281.945 | 0        | -0.39233 | 0.10392  | -3.77527 | 0.000273 | 0.023125 | 1 |
| ENSG0000 | remission | Inflamed | SRM       | protein_cc chr1  | 11114641 | 11120081 | - | 1898  | 2310.391 | 0        | -0.72159 | 0.191199 | -3.774   | 0.000274 | 0.023153 | 1 |
| ENSG0000 | remission | Inflamed | NNMT      | protein_cc chr11 | 1.14E+08 | 1.14E+08 | + | 2919  | 1120.871 | 0        | -1.49849 | 0.397537 | -3.76943 | 0.000278 | 0.023451 | 1 |
| ENSG0000 | remission | Inflamed | FCGR3A    | protein_cc chr1  | 1.62E+08 | 1.62E+08 | - | 2977  | 995.9308 | 0        | -1.41461 | 0.375577 | -3.76649 | 0.000281 | 0.023618 | 1 |
| ENSG0000 | remission | Inflamed | DKFZP434I | protein_cc chr9  | 98534605 | 98537013 | + | 2409  | 10.97613 | 0.095465 | 1.161643 | 0.308505 | 3.765388 | 0.000282 | 0.023634 | 1 |
| ENSG0000 | remission | Inflamed | UBE2S     | protein_cc chr19 | 55912652 | 55919145 | - | 1249  | 914.1838 | 0        | -0.59986 | 0.159401 | -3.76321 | 0.000284 | 0.023691 | 1 |
| ENSG0000 | remission | Inflamed | PADI4     | protein_cc chr1  | 17634690 | 17690499 | + | 2971  | 92.25537 | 0.0358   | -1.93406 | 0.514193 | -3.76136 | 0.000286 | 0.023691 | 1 |
| ENSG0000 | remission | Inflamed | CATSPER1  | protein_cc chr11 | 65784223 | 65793988 | - | 2687  | 9.988067 | 0.052506 | -0.98101 | 0.260861 | -3.76064 | 0.000287 | 0.023691 | 1 |
| ENSG0000 | remission | Inflamed | RP11-625L | antisense chr12  | 24983355 | 24989492 | + | 451   | 7.696897 | 0.362768 | -1.39828 | 0.371849 | -3.76034 | 0.000287 | 0.023691 | 1 |
| ENSG0000 | remission | Inflamed | IGKV2D-29 | IG_V_gene chr2   | 89986322 | 89987079 | + | 390   | 1916.021 | 0        | -1.83296 | 0.48764  | -3.75884 | 0.000289 | 0.023691 | 1 |

|          |           |          |            |                  |          |          |   |       |          |          |          |          |          |          |          |   |
|----------|-----------|----------|------------|------------------|----------|----------|---|-------|----------|----------|----------|----------|----------|----------|----------|---|
| ENSG0000 | remission | Inflamed | SLAMF8     | protein_cc chr1  | 1.6E+08  | 1.6E+08  | + | 2996  | 1442.093 | 0        | -0.88104 | 0.234502 | -3.75706 | 0.000291 | 0.023691 | 1 |
| ENSG0000 | remission | Inflamed | SH3RF3-AS1 | lincRNA chr2     | 1.1E+08  | 1.1E+08  | - | 1604  | 18.92363 | 0.0358   | -1.11181 | 0.296018 | -3.75587 | 0.000292 | 0.023691 | 1 |
| ENSG0000 | remission | Inflamed | RP11-216L  | processed_chr9   | 1.4E+08  | 1.4E+08  | + | 4335  | 114.0931 | 0        | 1.182413 | 0.314864 | 3.755318 | 0.000292 | 0.023691 | 1 |
| ENSG0000 | remission | Inflamed | SRGN       | protein_cc chr10 | 70847862 | 70864567 | + | 1220  | 3288.714 | 0        | -1.27663 | 0.340018 | -3.7546  | 0.000293 | 0.023691 | 1 |
| ENSG0000 | remission | Inflamed | SHISA5     | protein_cc chr3  | 48509197 | 48542259 | - | 4586  | 6936.496 | 0        | -0.4437  | 0.118179 | -3.75452 | 0.000293 | 0.023691 | 1 |
| ENSG0000 | remission | Inflamed | PMFBP1     | protein_cc chr16 | 72146056 | 72210777 | - | 5691  | 51.01193 | 0.011933 | 1.240988 | 0.33054  | 3.75443  | 0.000293 | 0.023691 | 1 |
| ENSG0000 | remission | Inflamed | LAG3       | protein_cc chr12 | 6881678  | 6887621  | + | 3056  | 565.4916 | 0        | -1.07211 | 0.285595 | -3.75396 | 0.000294 | 0.023691 | 1 |
| ENSG0000 | remission | Inflamed | HYAL2      | protein_cc chr3  | 50355221 | 50360337 | - | 4545  | 1611.129 | 0        | -0.70136 | 0.186902 | -3.75257 | 0.000295 | 0.023734 | 1 |
| ENSG0000 | remission | Inflamed | EXPH5      | protein_cc chr11 | 1.08E+08 | 1.08E+08 | - | 10843 | 616.2243 | 0.002387 | 1.852137 | 0.493997 | 3.749289 | 0.000299 | 0.023882 | 1 |
| ENSG0000 | remission | Inflamed | SPNS2      | protein_cc chr17 | 4402133  | 4442330  | + | 4111  | 3640.58  | 0        | -0.97698 | 0.260641 | -3.74839 | 0.0003   | 0.023882 | 1 |
| ENSG0000 | remission | Inflamed | CHPF       | protein_cc chr2  | 2.2E+08  | 2.2E+08  | - | 3354  | 4487.754 | 0        | -0.62396 | 0.166471 | -3.74817 | 0.0003   | 0.023882 | 1 |
| ENSG0000 | remission | Inflamed | TMEM236    | protein_cc chr10 | 18041218 | 18089855 | + | 5465  | 261.3126 | 0.009547 | 1.820813 | 0.485988 | 3.746622 | 0.000301 | 0.023939 | 1 |
| ENSG0000 | remission | Inflamed | NTRK2      | protein_cc chr9  | 87283466 | 87638505 | + | 16968 | 400.6921 | 0.011933 | 2.142869 | 0.572229 | 3.744775 | 0.000303 | 0.024021 | 1 |
| ENSG0000 | remission | Inflamed | RP11-296C  | antisense chr1   | 1.73E+08 | 1.73E+08 | - | 2282  | 43.57757 | 0.004773 | 0.951038 | 0.254225 | 3.740927 | 0.000307 | 0.024272 | 1 |
| ENSG0000 | remission | Inflamed | CTB-61M7   | lincRNA chr19    | 55402039 | 55402786 | + | 748   | 32.65632 | 0.312649 | -2.07442 | 0.55486  | -3.73864 | 0.00031  | 0.024273 | 1 |
| ENSG0000 | remission | Inflamed | CMTM2      | protein_cc chr16 | 66613351 | 66622178 | + | 1151  | 37.52745 | 0.136038 | -1.93603 | 0.51788  | -3.73838 | 0.00031  | 0.024273 | 1 |
| ENSG0000 | remission | Inflamed | KSR2       | protein_cc chr12 | 1.18E+08 | 1.18E+08 | - | 18298 | 198.9117 | 0.002387 | 1.397697 | 0.373881 | 3.738344 | 0.00031  | 0.024273 | 1 |
| ENSG0000 | remission | Inflamed | F11R       | protein_cc chr1  | 1.61E+08 | 1.61E+08 | - | 2114  | 9.071599 | 0.102625 | 0.848991 | 0.227276 | 3.735509 | 0.000313 | 0.02444  | 1 |
| ENSG0000 | remission | Inflamed | IL1A       | protein_cc chr2  | 1.14E+08 | 1.14E+08 | - | 2124  | 100.8091 | 0.085919 | -1.96831 | 0.52712  | -3.73408 | 0.000315 | 0.024464 | 1 |
| ENSG0000 | remission | Inflamed | IP6K2      | protein_cc chr3  | 48725436 | 48777786 | - | 5624  | 3219.933 | 0        | 0.529112 | 0.141719 | 3.733529 | 0.000315 | 0.024464 | 1 |
| ENSG0000 | remission | Inflamed | BCL2A1     | protein_cc chr15 | 80253231 | 80263788 | - | 1089  | 439.747  | 0.002387 | -1.82337 | 0.489586 | -3.72432 | 0.000326 | 0.025186 | 1 |
| ENSG0000 | remission | Inflamed | CDK20      | protein_cc chr9  | 90581356 | 90589668 | - | 5727  | 349.6516 | 0        | 0.772075 | 0.207505 | 3.72076  | 0.00033  | 0.025244 | 1 |
| ENSG0000 | remission | Inflamed | LRFN2      | protein_cc chr6  | 40359325 | 40555204 | - | 3270  | 4.811456 | 0.343675 | 0.961216 | 0.258345 | 3.720664 | 0.00033  | 0.025244 | 1 |
| ENSG0000 | remission | Inflamed | AC093818   | antisense chr2   | 1.73E+08 | 1.73E+08 | - | 2447  | 130.2578 | 0        | -1.09605 | 0.294606 | -3.72039 | 0.00033  | 0.025244 | 1 |
| ENSG0000 | remission | Inflamed | RP11-700F  | lincRNA chr17    | 49012350 | 49022074 | - | 2054  | 12.62291 | 0.062053 | 0.906022 | 0.243535 | 3.720291 | 0.00033  | 0.025244 | 1 |
| ENSG0000 | remission | Inflamed | OAZ1       | protein_cc chr19 | 2269485  | 2273487  | + | 3457  | 15996.95 | 0        | -0.39178 | 0.105335 | -3.71935 | 0.000331 | 0.025253 | 1 |
| ENSG0000 | remission | Inflamed | RP13-314C  | antisense chrX   | 23791109 | 23801073 | - | 672   | 6.143198 | 0.212411 | -0.99999 | 0.268993 | -3.71752 | 0.000333 | 0.02534  | 1 |
| ENSG0000 | remission | Inflamed | IFI27L2    | protein_cc chr14 | 94594116 | 94596590 | - | 1662  | 500.1575 | 0        | -0.78119 | 0.210252 | -3.71548 | 0.000336 | 0.025446 | 1 |
| ENSG0000 | remission | Inflamed | MT-CO3     | protein_cc chrM  | 9207     | 9990     | + | 784   | 883817.3 | 0        | 0.776802 | 0.209188 | 3.713411 | 0.000338 | 0.025556 | 1 |
| ENSG0000 | remission | Inflamed | LRRC7      | protein_cc chr1  | 70034081 | 70617628 | + | 14652 | 16.53222 | 0.155131 | 1.492018 | 0.402092 | 3.710638 | 0.000342 | 0.025694 | 1 |
| ENSG0000 | remission | Inflamed | HLA-DMA    | protein_cc chr6  | 32916390 | 32936871 | - | 2534  | 3383.432 | 0        | -0.81183 | 0.218838 | -3.70972 | 0.000343 | 0.025694 | 1 |
| ENSG0000 | remission | Inflamed | GPR125     | protein_cc chr4  | 22346694 | 22517677 | - | 9241  | 1957.649 | 0        | 0.838997 | 0.226183 | 3.709377 | 0.000343 | 0.025694 | 1 |
| ENSG0000 | remission | Inflamed | LILRA1     | protein_cc chr19 | 55105047 | 55113555 | + | 3587  | 185.6158 | 0.002387 | -1.34473 | 0.362657 | -3.70799 | 0.000345 | 0.025745 | 1 |
| ENSG0000 | remission | Inflamed | LYZ        | protein_cc chr12 | 69742121 | 69748014 | + | 1764  | 17476.03 | 0        | -0.88356 | 0.238428 | -3.70579 | 0.000347 | 0.025839 | 1 |
| ENSG0000 | remission | Inflamed | ATOX1      | protein_cc chr5  | 1.51E+08 | 1.51E+08 | - | 5239  | 947      | 0        | -0.52241 | 0.140995 | -3.70516 | 0.000348 | 0.025839 | 1 |
| ENSG0000 | remission | Inflamed | PNLIPRP1   | protein_cc chr10 | 1.18E+08 | 1.18E+08 | + | 4986  | 1.656325 | 0.689737 | 0.627444 | 0.169374 | 3.704485 | 0.000349 | 0.025839 | 1 |
| ENSG0000 | remission | Inflamed | RP11-293F  | antisense chr1   | 24367325 | 24413289 | + | 454   | 2.935561 | 0.441527 | 0.578854 | 0.156326 | 3.702866 | 0.000351 | 0.025859 | 1 |
| ENSG0000 | remission | Inflamed | MGAT1      | protein_cc chr5  | 1.8E+08  | 1.8E+08  | - | 5817  | 9325.575 | 0        | -0.45052 | 0.121678 | -3.70258 | 0.000351 | 0.025859 | 1 |
| ENSG0000 | remission | Inflamed | TREML2     | protein_cc chr6  | 41158015 | 41168932 | - | 3302  | 216.315  | 0.00716  | -1.8836  | 0.508829 | -3.70183 | 0.000352 | 0.025859 | 1 |
| ENSG0000 | remission | Inflamed | CTD-3185F  | antisense chr15  | 66780996 | 66781427 | - | 432   | 1.539379 | 0.587112 | 0.62227  | 0.168136 | 3.701001 | 0.000353 | 0.025861 | 1 |

|          |           |          |           |                  |          |          |   |       |          |          |          |          |          |          |          |   |
|----------|-----------|----------|-----------|------------------|----------|----------|---|-------|----------|----------|----------|----------|----------|----------|----------|---|
| ENSG0000 | remission | Inflamed | PTP4A3    | protein_cc chr8  | 1.42E+08 | 1.42E+08 | + | 1943  | 1338.914 | 0        | -1.56085 | 0.42186  | -3.69992 | 0.000354 | 0.025885 | 1 |
| ENSG0000 | remission | Inflamed | AGTRAP    | protein_cc chr1  | 11796141 | 11814859 | + | 2433  | 867.494  | 0        | -0.67967 | 0.183768 | -3.69851 | 0.000356 | 0.025926 | 1 |
| ENSG0000 | remission | Inflamed | AC034220  | processed_chr5   | 1.32E+08 | 1.32E+08 | - | 2856  | 134.8282 | 0        | 1.212976 | 0.328074 | 3.69726  | 0.000358 | 0.025926 | 1 |
| ENSG0000 | remission | Inflamed | NTRK3     | protein_cc chr15 | 88418230 | 88799999 | - | 9078  | 64.02864 | 0.02148  | 1.696075 | 0.458763 | 3.697065 | 0.000358 | 0.025926 | 1 |
| ENSG0000 | remission | Inflamed | LTK       | protein_cc chr15 | 41795836 | 41806085 | - | 3490  | 556.4845 | 0        | 0.7034   | 0.190341 | 3.695475 | 0.00036  | 0.02595  | 1 |
| ENSG0000 | remission | Inflamed | AC073283  | lincRNA chr2     | 47419544 | 47572213 | - | 3552  | 60.63723 | 0.004773 | 1.031957 | 0.279303 | 3.694756 | 0.000361 | 0.02595  | 1 |
| ENSG0000 | remission | Inflamed | MYH15     | protein_cc chr3  | 1.08E+08 | 1.08E+08 | - | 7694  | 24.34368 | 0.00716  | 0.901602 | 0.244133 | 3.693072 | 0.000363 | 0.02595  | 1 |
| ENSG0000 | remission | Inflamed | TYROBP    | protein_cc chr19 | 36395303 | 36399197 | - | 907   | 1692.654 | 0        | -0.97311 | 0.263498 | -3.69306 | 0.000363 | 0.02595  | 1 |
| ENSG0000 | remission | Inflamed | C19orf10  | protein_cc chr19 | 4641386  | 4670382  | - | 1678  | 3125.907 | 0        | -0.53058 | 0.143679 | -3.69284 | 0.000363 | 0.02595  | 1 |
| ENSG0000 | remission | Inflamed | PIM3      | protein_cc chr22 | 50354161 | 50357728 | + | 2461  | 4781.933 | 0        | -0.63944 | 0.173299 | -3.68983 | 0.000367 | 0.026151 | 1 |
| ENSG0000 | remission | Inflamed | ATP6V1F   | protein_cc chr7  | 1.29E+08 | 1.29E+08 | + | 789   | 1409.461 | 0        | -0.67821 | 0.183872 | -3.68847 | 0.000369 | 0.02616  | 1 |
| ENSG0000 | remission | Inflamed | TESC      | protein_cc chr12 | 1.17E+08 | 1.18E+08 | - | 1926  | 245.432  | 0        | -1.20171 | 0.325832 | -3.68811 | 0.000369 | 0.02616  | 1 |
| ENSG0000 | remission | Inflamed | RHOG      | protein_cc chr11 | 3848208  | 3862213  | - | 1782  | 3598.527 | 0        | -0.49029 | 0.132974 | -3.68711 | 0.000371 | 0.02616  | 1 |
| ENSG0000 | remission | Inflamed | AKIP1     | protein_cc chr11 | 8932686  | 8941631  | + | 2300  | 370.5847 | 0        | -0.3757  | 0.101911 | -3.6866  | 0.000371 | 0.02616  | 1 |
| ENSG0000 | remission | Inflamed | RP5-875H: | antisense chr17  | 48178068 | 48179284 | - | 430   | 7.866348 | 0.334129 | 1.104572 | 0.299687 | 3.685757 | 0.000372 | 0.026166 | 1 |
| ENSG0000 | remission | Inflamed | TAP1      | protein_cc chr6  | 32812986 | 32821755 | - | 4742  | 11757.22 | 0        | -0.60881 | 0.165294 | -3.68322 | 0.000376 | 0.026325 | 1 |
| ENSG0000 | remission | Inflamed | ADGB      | protein_cc chr6  | 1.47E+08 | 1.47E+08 | + | 7773  | 7.463007 | 0.205251 | 0.956142 | 0.25972  | 3.681428 | 0.000378 | 0.026418 | 1 |
| ENSG0000 | remission | Inflamed | FCGR1B    | protein_cc chr1  | 1.21E+08 | 1.21E+08 | - | 1392  | 32.4105  | 0.057279 | -1.50003 | 0.40783  | -3.67808 | 0.000382 | 0.026596 | 1 |
| ENSG0000 | remission | Inflamed | LINC00525 | antisense chr7   | 47801074 | 47806370 | + | 1212  | 18.92363 | 0.140811 | -1.47619 | 0.401391 | -3.67768 | 0.000383 | 0.026596 | 1 |
| ENSG0000 | remission | Inflamed | MPG       | protein_cc chr16 | 127006   | 135852   | + | 1661  | 1241.093 | 0        | -0.62084 | 0.168877 | -3.67631 | 0.000385 | 0.026596 | 1 |
| ENSG0000 | remission | Inflamed | BATF      | protein_cc chr14 | 75988768 | 76013358 | + | 980   | 225.3341 | 0        | -1.26117 | 0.343225 | -3.67447 | 0.000387 | 0.026596 | 1 |
| ENSG0000 | remission | Inflamed | DCC       | protein_cc chr18 | 49866542 | 51057784 | + | 8649  | 26.00239 | 0.133652 | -1.67408 | 0.455642 | -3.67411 | 0.000387 | 0.026596 | 1 |
| ENSG0000 | remission | Inflamed | HAAO      | protein_cc chr2  | 42994229 | 43019733 | - | 2726  | 637.6396 | 0        | 0.864567 | 0.235314 | 3.674105 | 0.000387 | 0.026596 | 1 |
| ENSG0000 | remission | Inflamed | RP11-855C | lincRNA chr11    | 61355966 | 61375022 | + | 2349  | 13.65155 | 0.169451 | 1.425432 | 0.388036 | 3.673458 | 0.000388 | 0.026596 | 1 |
| ENSG0000 | remission | Inflamed | IL6       | protein_cc chr7  | 22765503 | 22771621 | + | 2711  | 203.0024 | 0.097852 | -2.53141 | 0.689386 | -3.67198 | 0.00039  | 0.026596 | 1 |
| ENSG0000 | remission | Inflamed | PPCDC     | protein_cc chr15 | 75315896 | 75409803 | + | 3781  | 485.611  | 0        | -0.45036 | 0.122665 | -3.67146 | 0.000391 | 0.026596 | 1 |
| ENSG0000 | remission | Inflamed | LSM10     | protein_cc chr1  | 36856839 | 36863493 | - | 1496  | 614.4845 | 0        | -0.63117 | 0.171923 | -3.6712  | 0.000391 | 0.026596 | 1 |
| ENSG0000 | remission | Inflamed | RP11-536C | lincRNA chr9     | 13446490 | 13487510 | + | 512   | 11.82578 | 0.238663 | -1.28772 | 0.35077  | -3.67111 | 0.000391 | 0.026596 | 1 |
| ENSG0000 | remission | Inflamed | FAM3B     | protein_cc chr21 | 42676139 | 42729358 | + | 3599  | 409.7375 | 0.038186 | -2.209   | 0.602384 | -3.6671  | 0.000397 | 0.026822 | 1 |
| ENSG0000 | remission | Inflamed | VKORC1    | protein_cc chr16 | 31102163 | 31107301 | - | 2191  | 328.3031 | 0        | -0.60564 | 0.16517  | -3.66679 | 0.000397 | 0.026822 | 1 |
| ENSG0000 | remission | Inflamed | PRKG2     | protein_cc chr4  | 82009837 | 82136218 | - | 3751  | 94.65394 | 0.031026 | 1.431955 | 0.390624 | 3.665813 | 0.000399 | 0.026822 | 1 |
| ENSG0000 | remission | Inflamed | PILRA     | protein_cc chr7  | 99965153 | 99997719 | + | 2003  | 502.4702 | 0        | -1.07181 | 0.2924   | -3.66555 | 0.000399 | 0.026822 | 1 |
| ENSG0000 | remission | Inflamed | ZBP1      | protein_cc chr20 | 56178902 | 56195632 | - | 5413  | 1313.508 | 0        | -1.24402 | 0.33944  | -3.66491 | 0.0004   | 0.026822 | 1 |
| ENSG0000 | remission | Inflamed | SSR4      | protein_cc chrX  | 1.53E+08 | 1.53E+08 | + | 4590  | 10562.49 | 0        | -0.9045  | 0.24694  | -3.66282 | 0.000403 | 0.026947 | 1 |
| ENSG0000 | remission | Inflamed | SYT17     | protein_cc chr16 | 19179293 | 19279652 | + | 7534  | 170.8926 | 0        | 0.80769  | 0.220606 | 3.661237 | 0.000405 | 0.027025 | 1 |
| ENSG0000 | remission | Inflamed | GZMH      | protein_cc chr14 | 25075686 | 25078905 | - | 951   | 64.67542 | 0.002387 | -0.98344 | 0.268684 | -3.66022 | 0.000406 | 0.027051 | 1 |
| ENSG0000 | remission | Inflamed | SATB2     | protein_cc chr2  | 2E+08    | 2E+08    | - | 10958 | 4407.969 | 0        | 1.327315 | 0.362721 | 3.659329 | 0.000408 | 0.027065 | 1 |
| ENSG0000 | remission | Inflamed | PREB      | protein_cc chr2  | 27353624 | 27357543 | - | 3221  | 3084.733 | 0        | -0.40094 | 0.109609 | -3.65792 | 0.00041  | 0.027128 | 1 |
| ENSG0000 | remission | Inflamed | APOL1     | protein_cc chr22 | 36649056 | 36663576 | + | 3519  | 7445.377 | 0        | -1.14582 | 0.313394 | -3.65615 | 0.000412 | 0.027225 | 1 |
| ENSG0000 | remission | Inflamed | SLC3A2    | protein_cc chr11 | 62623518 | 62656352 | + | 5239  | 3422.721 | 0        | -0.43908 | 0.120124 | -3.6552  | 0.000413 | 0.027243 | 1 |

|          |           |          |           |            |       |          |          |   |       |          |          |          |          |          |          |          |   |
|----------|-----------|----------|-----------|------------|-------|----------|----------|---|-------|----------|----------|----------|----------|----------|----------|----------|---|
| ENSG0000 | remission | Inflamed | PNLIPRP2  | polymorph  | chr10 | 1.18E+08 | 1.18E+08 | + | 1672  | 104.9976 | 0.085919 | 1.986085 | 0.543473 | 3.65443  | 0.000415 | 0.027243 | 1 |
| ENSG0000 | remission | Inflamed | REG3A     | protein_cc | chr2  | 79384132 | 79386879 | - | 1580  | 6082.527 | 0.016706 | -3.6695  | 1.004306 | -3.65377 | 0.000416 | 0.027243 | 1 |
| ENSG0000 | remission | Inflamed | USP30     | protein_cc | chr12 | 1.09E+08 | 1.1E+08  | + | 5135  | 771.4726 | 0        | 0.620037 | 0.169747 | 3.652713 | 0.000417 | 0.027274 | 1 |
| ENSG0000 | remission | Inflamed | RP11-379E | pseudoger  | chr3  | 1.26E+08 | 1.26E+08 | - | 259   | 1.98568  | 0.498807 | 0.678155 | 0.185809 | 3.649747 | 0.000421 | 0.027484 | 1 |
| ENSG0000 | remission | Inflamed | RP1-239B2 | antisense  | chr11 | 17402196 | 17405078 | + | 2883  | 178.864  | 0        | 0.989714 | 0.271286 | 3.648231 | 0.000423 | 0.027521 | 1 |
| ENSG0000 | remission | Inflamed | CNTD1     | protein_cc | chr17 | 40950810 | 40963605 | + | 3378  | 10.93556 | 0.083532 | 1.046184 | 0.28679  | 3.647908 | 0.000424 | 0.027521 | 1 |
| ENSG0000 | remission | Inflamed | CTD-2501E | antisense  | chr15 | 60822172 | 60837358 | + | 434   | 1.601432 | 0.601432 | 0.578312 | 0.158605 | 3.646242 | 0.000426 | 0.027611 | 1 |
| ENSG0000 | remission | Inflamed | MRPL55    | protein_cc | chr1  | 2.28E+08 | 2.28E+08 | - | 1886  | 625.7924 | 0        | -0.41303 | 0.113325 | -3.64467 | 0.000429 | 0.027647 | 1 |
| ENSG0000 | remission | Inflamed | MT1M      | protein_cc | chr16 | 56666145 | 56667898 | + | 942   | 360.1814 | 0.004773 | 1.700469 | 0.466595 | 3.644422 | 0.000429 | 0.027647 | 1 |
| ENSG0000 | remission | Inflamed | HRH2      | protein_cc | chr5  | 1.75E+08 | 1.75E+08 | + | 4055  | 130.8998 | 0.02148  | -1.60385 | 0.44032  | -3.64246 | 0.000432 | 0.027765 | 1 |
| ENSG0000 | remission | Inflamed | CA1       | protein_cc | chr8  | 86239837 | 86291243 | - | 4068  | 13359.33 | 0.004773 | 3.026301 | 0.831066 | 3.641468 | 0.000433 | 0.027791 | 1 |
| ENSG0000 | remission | Inflamed | ICAM1     | protein_cc | chr19 | 10381511 | 10397291 | + | 3706  | 4256.539 | 0        | -1.31002 | 0.35982  | -3.64077 | 0.000434 | 0.027791 | 1 |
| ENSG0000 | remission | Inflamed | CD300A    | protein_cc | chr17 | 72462555 | 72480933 | + | 2684  | 717.0024 | 0        | -0.83355 | 0.229113 | -3.63817 | 0.000438 | 0.027971 | 1 |
| ENSG0000 | remission | Inflamed | AC112229  | lincRNA    | chr2  | 1.11E+08 | 1.11E+08 | - | 2774  | 121.1432 | 0.00716  | 0.877541 | 0.241364 | 3.63576  | 0.000442 | 0.028115 | 1 |
| ENSG0000 | remission | Inflamed | AC092652  | antisense  | chr2  | 1.44E+08 | 1.44E+08 | - | 735   | 3        | 0.53222  | 0.836252 | 0.23004  | 3.635252 | 0.000443 | 0.028115 | 1 |
| ENSG0000 | remission | Inflamed | AC073133  | lincRNA    | chr7  | 1.56E+08 | 1.56E+08 | - | 2698  | 21.05967 | 0.124105 | 1.416413 | 0.389723 | 3.634408 | 0.000444 | 0.028128 | 1 |
| ENSG0000 | remission | Inflamed | AC005740  | antisense  | chr5  | 1.41E+08 | 1.41E+08 | + | 957   | 8.990453 | 0.062053 | 0.704398 | 0.193983 | 3.631242 | 0.000449 | 0.0283   | 1 |
| ENSG0000 | remission | Inflamed | CCR1      | protein_cc | chr3  | 46243200 | 46249887 | - | 2731  | 700.3747 | 0        | -1.10588 | 0.304547 | -3.63122 | 0.000449 | 0.0283   | 1 |
| ENSG0000 | remission | Inflamed | DUOXA2    | protein_cc | chr15 | 45406519 | 45410619 | + | 2554  | 8410.351 | 0.002387 | -2.79    | 0.768727 | -3.62938 | 0.000452 | 0.02841  | 1 |
| ENSG0000 | remission | Inflamed | ARHGAP42  | protein_cc | chr17 | 12692856 | 12894960 | + | 9281  | 2439.105 | 0        | 0.998972 | 0.27534  | 3.628144 | 0.000454 | 0.028411 | 1 |
| ENSG0000 | remission | Inflamed | MAD2L2    | protein_cc | chr1  | 11734537 | 11751707 | - | 3324  | 449.9475 | 0        | -0.76714 | 0.211479 | -3.62748 | 0.000455 | 0.028411 | 1 |
| ENSG0000 | remission | Inflamed | PANX2     | protein_cc | chr22 | 50609160 | 50618723 | + | 3102  | 44.45585 | 0.042959 | -1.53208 | 0.422406 | -3.62702 | 0.000455 | 0.028411 | 1 |
| ENSG0000 | remission | Inflamed | PRDX4     | protein_cc | chrX  | 23682379 | 23704516 | + | 1904  | 2190.401 | 0        | -0.77733 | 0.214343 | -3.62659 | 0.000456 | 0.028411 | 1 |
| ENSG0000 | remission | Inflamed | RP11-875C | antisense  | chr8  | 22928890 | 22932001 | - | 881   | 6.861575 | 0.183771 | -0.98108 | 0.270603 | -3.62554 | 0.000458 | 0.028445 | 1 |
| ENSG0000 | remission | Inflamed | CCM2      | protein_cc | chr7  | 45039074 | 45116068 | + | 8196  | 2144.086 | 0        | -0.37392 | 0.103218 | -3.62259 | 0.000462 | 0.028602 | 1 |
| ENSG0000 | remission | Inflamed | CD300E    | protein_cc | chr17 | 72606026 | 72619897 | - | 3772  | 537.8711 | 0.011933 | -2.34143 | 0.646351 | -3.62254 | 0.000462 | 0.028602 | 1 |
| ENSG0000 | remission | Inflamed | ICAM4     | protein_cc | chr19 | 10397643 | 10399198 | + | 1427  | 66.53461 | 0        | -1.09956 | 0.303669 | -3.62093 | 0.000465 | 0.028631 | 1 |
| ENSG0000 | remission | Inflamed | GLA       | protein_cc | chrX  | 1.01E+08 | 1.01E+08 | - | 2065  | 636.3675 | 0        | -0.56835 | 0.156964 | -3.62087 | 0.000465 | 0.028631 | 1 |
| ENSG0000 | remission | Inflamed | NCF2      | protein_cc | chr1  | 1.84E+08 | 1.84E+08 | - | 2928  | 1259.494 | 0        | -1.24845 | 0.344877 | -3.61998 | 0.000466 | 0.028651 | 1 |
| ENSG0000 | remission | Inflamed | ANK3      | protein_cc | chr10 | 61786056 | 62493248 | - | 24624 | 1177.726 | 0        | 1.183224 | 0.327021 | 3.618187 | 0.000469 | 0.028664 | 1 |
| ENSG0000 | remission | Inflamed | ZADH2     | protein_cc | chr18 | 72907063 | 72921303 | - | 8157  | 1859.379 | 0        | 0.612095 | 0.169186 | 3.617874 | 0.00047  | 0.028664 | 1 |
| ENSG0000 | remission | Inflamed | KDELCP1P1 | pseudoger  | chr5  | 1.27E+08 | 1.27E+08 | + | 1509  | 1.801909 | 0.546539 | 0.761709 | 0.210571 | 3.617348 | 0.000471 | 0.028664 | 1 |
| ENSG0000 | remission | Inflamed | FAM26F    | protein_cc | chr6  | 1.17E+08 | 1.17E+08 | + | 1186  | 361.5036 | 0        | -1.18462 | 0.327505 | -3.61712 | 0.000471 | 0.028664 | 1 |
| ENSG0000 | remission | Inflamed | IGLV4-60  | IG_V_gene  | chr22 | 22516592 | 22517074 | + | 362   | 1038.854 | 0.009547 | -1.96716 | 0.544278 | -3.61425 | 0.000476 | 0.028799 | 1 |
| ENSG0000 | remission | Inflamed | ISG20     | protein_cc | chr15 | 89179384 | 89199714 | + | 7363  | 2719.723 | 0        | -0.72187 | 0.199758 | -3.6137  | 0.000477 | 0.028799 | 1 |
| ENSG0000 | remission | Inflamed | IYD       | protein_cc | chr6  | 1.51E+08 | 1.51E+08 | + | 10362 | 811.1957 | 0.004773 | 1.413254 | 0.391156 | 3.613023 | 0.000478 | 0.028799 | 1 |
| ENSG0000 | remission | Inflamed | CTSH      | protein_cc | chr15 | 79213400 | 79241916 | - | 5892  | 3696.647 | 0        | -0.73671 | 0.203918 | -3.61276 | 0.000478 | 0.028799 | 1 |
| ENSG0000 | remission | Inflamed | IGKV2D-3C | IG_V_gene  | chr2  | 89975669 | 89976489 | + | 395   | 200.6587 | 0        | -1.4181  | 0.392568 | -3.61236 | 0.000479 | 0.028799 | 1 |
| ENSG0000 | remission | Inflamed | ITIH6     | protein_cc | chrX  | 54775332 | 54824673 | - | 5497  | 2.384248 | 0.527446 | 0.941508 | 0.260696 | 3.611519 | 0.00048  | 0.028816 | 1 |
| ENSG0000 | remission | Inflamed | ALG1L13P  | pseudoger  | chr8  | 8093525  | 8102189  | - | 1447  | 22.48687 | 0.054893 | -1.31912 | 0.365432 | -3.60976 | 0.000483 | 0.028851 | 1 |

|          |           |          |           |               |       |          |          |   |      |          |          |          |          |          |          |          |   |
|----------|-----------|----------|-----------|---------------|-------|----------|----------|---|------|----------|----------|----------|----------|----------|----------|----------|---|
| ENSG0000 | remission | Inflamed | UGT1A13F  | pseudoger     | chr2  | 2.35E+08 | 2.35E+08 | + | 762  | 1.732697 | 0.642005 | 0.70527  | 0.195386 | 3.609631 | 0.000483 | 0.028851 | 1 |
| ENSG0000 | remission | Inflamed | TMEM72    | protein_cc    | chr10 | 45406648 | 45432450 | + | 3157 | 479.7208 | 0.02864  | 2.323932 | 0.643899 | 3.609156 | 0.000484 | 0.028851 | 1 |
| ENSG0000 | remission | Inflamed | TKT       | protein_cc    | chr3  | 53258723 | 53290068 | - | 9507 | 9892.785 | 0        | -0.38854 | 0.107746 | -3.60609 | 0.000489 | 0.029088 | 1 |
| ENSG0000 | remission | Inflamed | LGALS12   | protein_cc    | chr11 | 63273556 | 63284246 | + | 2270 | 56.41766 | 0.033413 | -1.38295 | 0.383591 | -3.60527 | 0.00049  | 0.029103 | 1 |
| ENSG0000 | remission | Inflamed | IGKV6-21  | IG_V_gene     | chr2  | 89459235 | 89459850 | - | 406  | 866.5823 | 0.002387 | -1.73432 | 0.481282 | -3.60354 | 0.000493 | 0.029108 | 1 |
| ENSG0000 | remission | Inflamed | ENPP7P11  | pseudoger     | chr4  | 9678932  | 9679558  | + | 627  | 65.11933 | 0.02864  | 1.705846 | 0.473416 | 3.603273 | 0.000494 | 0.029108 | 1 |
| ENSG0000 | remission | Inflamed | RP11-480I | lincRNA       | chr1  | 2.03E+08 | 2.03E+08 | + | 2321 | 8.22673  | 0.155131 | 0.861463 | 0.239144 | 3.602271 | 0.000495 | 0.029108 | 1 |
| ENSG0000 | remission | Inflamed | SLC16A9   | protein_cc    | chr10 | 61410523 | 61495760 | - | 4425 | 992.8473 | 0        | 1.657811 | 0.460239 | 3.602065 | 0.000496 | 0.029108 | 1 |
| ENSG0000 | remission | Inflamed | HLA-DRA   | protein_cc    | chr6  | 32407619 | 32412823 | + | 1280 | 23569.27 | 0        | -0.84925 | 0.235825 | -3.6012  | 0.000497 | 0.029108 | 1 |
| ENSG0000 | remission | Inflamed | RP11-107C | protein_cc    | chr14 | 95982473 | 95984248 | + | 993  | 60.642   | 0.009547 | -1.50661 | 0.418367 | -3.60117 | 0.000497 | 0.029108 | 1 |
| ENSG0000 | remission | Inflamed | ZNF575    | protein_cc    | chr19 | 44029649 | 44040282 | + | 3222 | 401.0597 | 0        | 0.96845  | 0.268968 | 3.600608 | 0.000498 | 0.029108 | 1 |
| ENSG0000 | remission | Inflamed | XX-CR54.3 | lincRNA       | chr1  | 2.49E+08 | 2.49E+08 | - | 1098 | 49.8568  | 0.069212 | 1.728039 | 0.480338 | 3.59755  | 0.000503 | 0.029346 | 1 |
| ENSG0000 | remission | Inflamed | HSD3B7    | protein_cc    | chr16 | 30996519 | 31000473 | + | 2504 | 1398.403 | 0        | -0.59826 | 0.166328 | -3.59687 | 0.000505 | 0.029349 | 1 |
| ENSG0000 | remission | Inflamed | HK3       | protein_cc    | chr5  | 1.76E+08 | 1.76E+08 | - | 3290 | 564.2458 | 0        | -1.25606 | 0.349354 | -3.59539 | 0.000507 | 0.029432 | 1 |
| ENSG0000 | remission | Inflamed | SPI1      | protein_cc    | chr11 | 47376411 | 47400127 | - | 2069 | 2341.384 | 0        | -1.03434 | 0.287785 | -3.59415 | 0.000509 | 0.029434 | 1 |
| ENSG0000 | remission | Inflamed | IGHG4     | IG_C_gene     | chr14 | 1.06E+08 | 1.06E+08 | - | 1110 | 20595.28 | 0        | -2.3698  | 0.659446 | -3.59362 | 0.00051  | 0.029434 | 1 |
| ENSG0000 | remission | Inflamed | SELPLG    | protein_cc    | chr12 | 1.09E+08 | 1.09E+08 | - | 2843 | 1796.453 | 0        | -1.05219 | 0.292835 | -3.59313 | 0.000511 | 0.029434 | 1 |
| ENSG0000 | remission | Inflamed | RP11-761E | lincRNA       | chrX  | 1.15E+08 | 1.15E+08 | - | 2079 | 5.914081 | 0.126492 | 0.72757  | 0.202516 | 3.592656 | 0.000512 | 0.029434 | 1 |
| ENSG0000 | remission | Inflamed | HSD11B1   | protein_cc    | chr1  | 2.1E+08  | 2.1E+08  | + | 1526 | 83.47255 | 0.011933 | -1.70469 | 0.474561 | -3.59214 | 0.000513 | 0.029434 | 1 |
| ENSG0000 | remission | Inflamed | DOK2      | protein_cc    | chr8  | 21766384 | 21771371 | - | 2211 | 823.8043 | 0        | -0.76586 | 0.213319 | -3.5902  | 0.000516 | 0.029563 | 1 |
| ENSG0000 | remission | Inflamed | NTRK1     | protein_cc    | chr1  | 1.57E+08 | 1.57E+08 | + | 4356 | 42.69212 | 0.01432  | -0.97006 | 0.270323 | -3.5885  | 0.000519 | 0.02967  | 1 |
| ENSG0000 | remission | Inflamed | RP11-695J | antisense     | chr12 | 14720684 | 14772689 | + | 596  | 38.33652 | 0.01432  | 0.698773 | 0.194848 | 3.586247 | 0.000523 | 0.029832 | 1 |
| ENSG0000 | remission | Inflamed | RP11-794C | lincRNA       | chr11 | 61306988 | 61309731 | - | 1831 | 40.53938 | 0.0358   | 1.330586 | 0.371171 | 3.584834 | 0.000526 | 0.029854 | 1 |
| ENSG0000 | remission | Inflamed | RP11-747I | lincRNA       | chr3  | 1.65E+08 | 1.65E+08 | - | 1948 | 34.47494 | 0.095465 | 1.568826 | 0.437705 | 3.584204 | 0.000527 | 0.029854 | 1 |
| ENSG0000 | remission | Inflamed | TUBG1     | protein_cc    | chr17 | 40761694 | 40767252 | + | 2411 | 1242.974 | 0        | -0.36046 | 0.100585 | -3.58362 | 0.000528 | 0.029854 | 1 |
| ENSG0000 | remission | Inflamed | PIP5KL1   | protein_cc    | chr9  | 1.31E+08 | 1.31E+08 | - | 3341 | 20.29356 | 0.009547 | -0.71007 | 0.198199 | -3.5826  | 0.00053  | 0.029854 | 1 |
| ENSG0000 | remission | Inflamed | IL17C     | protein_cc    | chr16 | 88704999 | 88706881 | + | 1379 | 12.46539 | 0.272076 | -1.41798 | 0.395884 | -3.5818  | 0.000531 | 0.029854 | 1 |
| ENSG0000 | remission | Inflamed | MT-ND5    | protein_cc    | chrM  | 12337    | 14148    | + | 1812 | 559923.9 | 0        | 0.610958 | 0.170576 | 3.581726 | 0.000531 | 0.029854 | 1 |
| ENSG0000 | remission | Inflamed | RP11-598F | lincRNA       | chr12 | 276022   | 291565   | - | 1184 | 16.65871 | 0.205251 | -1.50235 | 0.419491 | -3.58136 | 0.000532 | 0.029854 | 1 |
| ENSG0000 | remission | Inflamed | RP11-96C2 | sense_intr    | chr10 | 88873711 | 88875280 | + | 688  | 0.918854 | 0.770883 | 0.576022 | 0.160857 | 3.580945 | 0.000533 | 0.029854 | 1 |
| ENSG0000 | remission | Inflamed | AC006132  | protein_cc    | chr19 | 46144752 | 46146098 | + | 1235 | 47.68974 | 0.002387 | -0.91584 | 0.255873 | -3.57926 | 0.000536 | 0.029941 | 1 |
| ENSG0000 | remission | Inflamed | SRCRB4D   | protein_cc    | chr7  | 76018651 | 76039012 | - | 2819 | 16.179   | 0.002387 | -0.57539 | 0.160779 | -3.57879 | 0.000536 | 0.029941 | 1 |
| ENSG0000 | remission | Inflamed | SLC45A2   | protein_cc    | chr5  | 33944721 | 33984835 | - | 3269 | 12.43437 | 0.329356 | 1.286031 | 0.359418 | 3.578095 | 0.000538 | 0.029941 | 1 |
| ENSG0000 | remission | Inflamed | MMP12     | processed_chr | 11    | 1.03E+08 | 1.03E+08 | - | 1879 | 3511.969 | 0        | -1.59973 | 0.447152 | -3.57758 | 0.000539 | 0.029941 | 1 |
| ENSG0000 | remission | Inflamed | CYP4F8    | processed_chr | 19    | 15726029 | 15741448 | + | 7047 | 2.205251 | 0.637232 | 0.717554 | 0.200737 | 3.574602 | 0.000544 | 0.03018  | 1 |
| ENSG0000 | remission | Inflamed | PRF1      | protein_cc    | chr10 | 72357104 | 72362531 | - | 2534 | 581.3986 | 0        | -0.90554 | 0.253484 | -3.57237 | 0.000548 | 0.030224 | 1 |
| ENSG0000 | remission | Inflamed | RP11-280C | antisense     | chr1  | 1.65E+08 | 1.66E+08 | - | 4036 | 0.983294 | 0.749403 | 0.424006 | 0.118692 | 3.572325 | 0.000548 | 0.030224 | 1 |
| ENSG0000 | remission | Inflamed | RP5-884M  | lincRNA       | chr7  | 1.06E+08 | 1.06E+08 | + | 3542 | 77.30072 | 0.155131 | -1.87075 | 0.523681 | -3.5723  | 0.000548 | 0.030224 | 1 |
| ENSG0000 | remission | Inflamed | PSME2     | protein_cc    | chr14 | 24612574 | 24616779 | - | 3579 | 5475.58  | 0        | -0.56073 | 0.157066 | -3.57005 | 0.000553 | 0.030252 | 1 |
| ENSG0000 | remission | Inflamed | MYBL2     | protein_cc    | chr20 | 42295754 | 42345136 | + | 2682 | 1627.647 | 0        | -0.68414 | 0.191665 | -3.56946 | 0.000554 | 0.030252 | 1 |



|          |           |          |            |                  |          |          |   |       |          |          |          |          |          |          |          |   |
|----------|-----------|----------|------------|------------------|----------|----------|---|-------|----------|----------|----------|----------|----------|----------|----------|---|
| ENSG0000 | remission | Inflamed | ORAI2      | protein_cc chr7  | 1.02E+08 | 1.02E+08 | + | 11098 | 2315.403 | 0        | -0.93201 | 0.26112  | -3.56926 | 0.000554 | 0.030252 | 1 |
| ENSG0000 | remission | Inflamed | CTC-459F4  | pseudoger chr19  | 28294446 | 28294968 | + | 523   | 4.968974 | 0.164678 | 0.75398  | 0.211253 | 3.56909  | 0.000554 | 0.030252 | 1 |
| ENSG0000 | remission | Inflamed | CD40       | protein_cc chr20 | 44746911 | 44758502 | + | 2368  | 881.8759 | 0        | -0.89859 | 0.251869 | -3.56769 | 0.000557 | 0.030252 | 1 |
| ENSG0000 | remission | Inflamed | AC009133   | lincRNA chr16    | 29793246 | 29794294 | + | 1049  | 1568.621 | 0.011933 | 2.53868  | 0.71167  | 3.567216 | 0.000558 | 0.030252 | 1 |
| ENSG0000 | remission | Inflamed | UGT2A3     | protein_cc chr4  | 69794181 | 69817509 | - | 3062  | 723.7661 | 0.054893 | 2.501309 | 0.701237 | 3.566995 | 0.000558 | 0.030252 | 1 |
| ENSG0000 | remission | Inflamed | SERPINE1   | protein_cc chr7  | 1.01E+08 | 1.01E+08 | + | 3190  | 1984.537 | 0.002387 | -2.12381 | 0.595438 | -3.56681 | 0.000559 | 0.030252 | 1 |
| ENSG0000 | remission | Inflamed | MMP25      | protein_cc chr16 | 3096682  | 3110727  | + | 4126  | 1374.465 | 0        | -1.25061 | 0.350687 | -3.56617 | 0.00056  | 0.030252 | 1 |
| ENSG0000 | remission | Inflamed | UCK2       | protein_cc chr1  | 1.66E+08 | 1.66E+08 | + | 6756  | 2077.363 | 0        | 0.429911 | 0.120562 | 3.565889 | 0.00056  | 0.030252 | 1 |
| ENSG0000 | remission | Inflamed | CLCA3P     | pseudoger chr1   | 87099956 | 87121059 | + | 3437  | 18.70406 | 0.136038 | -1.45505 | 0.408275 | -3.5639  | 0.000564 | 0.030282 | 1 |
| ENSG0000 | remission | Inflamed | RP11-379E  | lincRNA chr3     | 1.26E+08 | 1.26E+08 | - | 4198  | 109.2387 | 0.002387 | 1.036514 | 0.29084  | 3.563864 | 0.000564 | 0.030282 | 1 |
| ENSG0000 | remission | Inflamed | AC091492   | pseudoger chr3   | 12369502 | 12369773 | + | 272   | 0.926014 | 0.76611  | 0.514272 | 0.144305 | 3.563776 | 0.000564 | 0.030282 | 1 |
| ENSG0000 | remission | Inflamed | IL24       | protein_cc chr1  | 2.07E+08 | 2.07E+08 | + | 1979  | 152.3484 | 0.360382 | -3.0359  | 0.852616 | -3.56068 | 0.00057  | 0.030535 | 1 |
| ENSG0000 | remission | Inflamed | TXNDC11    | protein_cc chr16 | 11772936 | 11836734 | - | 4292  | 4994.864 | 0        | -0.50043 | 0.140609 | -3.55904 | 0.000573 | 0.030535 | 1 |
| ENSG0000 | remission | Inflamed | MAPKAPK    | protein_cc chr1  | 2.07E+08 | 2.07E+08 | + | 4195  | 7827.566 | 0        | -0.58118 | 0.163311 | -3.5587  | 0.000574 | 0.030535 | 1 |
| ENSG0000 | remission | Inflamed | CFP        | protein_cc chrX  | 47483612 | 47489704 | - | 4576  | 473.4988 | 0        | -1.14801 | 0.322595 | -3.55867 | 0.000574 | 0.030535 | 1 |
| ENSG0000 | remission | Inflamed | PTPN21     | protein_cc chr14 | 88932122 | 89021077 | - | 7396  | 1421.931 | 0        | 0.800889 | 0.225113 | 3.557722 | 0.000576 | 0.030535 | 1 |
| ENSG0000 | remission | Inflamed | IMPDH1     | protein_cc chr7  | 1.28E+08 | 1.28E+08 | - | 3662  | 2418.876 | 0        | -0.57215 | 0.160821 | -3.55771 | 0.000576 | 0.030535 | 1 |
| ENSG0000 | remission | Inflamed | SIGLEC7    | protein_cc chr19 | 51645556 | 51656783 | + | 2043  | 181.0406 | 0        | -0.80197 | 0.225588 | -3.555   | 0.000581 | 0.030701 | 1 |
| ENSG0000 | remission | Inflamed | LILRB3     | protein_cc chr19 | 54720147 | 54746602 | - | 4096  | 163.0143 | 0.00716  | -1.56175 | 0.439353 | -3.55465 | 0.000582 | 0.030701 | 1 |
| ENSG0000 | remission | Inflamed | TNNI2      | protein_cc chr11 | 1860219  | 1862910  | + | 1080  | 24.76372 | 0.002387 | -0.7705  | 0.216793 | -3.55408 | 0.000583 | 0.030701 | 1 |
| ENSG0000 | remission | Inflamed | RNU6-418   | snRNA chr1       | 2.06E+08 | 2.06E+08 | + | 107   | 2.763723 | 0.498807 | 0.91294  | 0.256897 | 3.553716 | 0.000584 | 0.030701 | 1 |
| ENSG0000 | remission | Inflamed | RASGRP4    | protein_cc chr19 | 38899695 | 38916945 | - | 3848  | 421.7184 | 0        | -1.09271 | 0.307537 | -3.5531  | 0.000585 | 0.030703 | 1 |
| ENSG0000 | remission | Inflamed | NINJ1      | protein_cc chr9  | 95883771 | 95896570 | - | 2648  | 1883.208 | 0        | -0.7718  | 0.217316 | -3.55153 | 0.000588 | 0.030768 | 1 |
| ENSG0000 | remission | Inflamed | HNF1A-AS   | antisense chr12  | 1.21E+08 | 1.21E+08 | - | 1430  | 226.8401 | 0.011933 | 1.228147 | 0.345832 | 3.551287 | 0.000589 | 0.030768 | 1 |
| ENSG0000 | remission | Inflamed | MROH7-T1   | protein_cc chr1  | 55107459 | 55207981 | + | 7090  | 4.508353 | 0.386635 | 0.870108 | 0.245142 | 3.549409 | 0.000592 | 0.030818 | 1 |
| ENSG0000 | remission | Inflamed | CCDC71     | protein_cc chr3  | 49199968 | 49203754 | - | 1781  | 641.1695 | 0        | -0.28895 | 0.081416 | -3.54906 | 0.000593 | 0.030818 | 1 |
| ENSG0000 | remission | Inflamed | CTD-2005f  | lincRNA chr11    | 86438397 | 86476307 | + | 503   | 1.174224 | 0.701671 | 0.520327 | 0.146624 | 3.548719 | 0.000594 | 0.030818 | 1 |
| ENSG0000 | remission | Inflamed | C17orf96   | protein_cc chr17 | 36827961 | 36831187 | - | 3227  | 189.3771 | 0.002387 | -1.12035 | 0.31573  | -3.54845 | 0.000594 | 0.030818 | 1 |
| ENSG0000 | remission | Inflamed | hsa-mir-67 | pseudoger chr1   | 566454   | 567996   | + | 1543  | 65555.85 | 0        | 0.767803 | 0.216436 | 3.547489 | 0.000596 | 0.030845 | 1 |
| ENSG0000 | remission | Inflamed | CA7        | protein_cc chr16 | 66878282 | 66888056 | + | 1862  | 2271.05  | 0.00716  | 2.490141 | 0.702111 | 3.546648 | 0.000598 | 0.030845 | 1 |
| ENSG0000 | remission | Inflamed | IL1RN      | protein_cc chr2  | 1.14E+08 | 1.14E+08 | + | 3256  | 3354.305 | 0        | -1.57593 | 0.444369 | -3.54644 | 0.000598 | 0.030845 | 1 |
| ENSG0000 | remission | Inflamed | BEST2      | protein_cc chr19 | 12862516 | 12869272 | + | 2646  | 1466.463 | 0.011933 | 2.563255 | 0.723065 | 3.544986 | 0.000601 | 0.030935 | 1 |
| ENSG0000 | remission | Inflamed | IGKV1-9    | IG_V_gene chr2   | 89309479 | 89310012 | - | 409   | 10470.12 | 0        | -1.67745 | 0.473368 | -3.54365 | 0.000604 | 0.031014 | 1 |
| ENSG0000 | remission | Inflamed | RUNDC3B    | protein_cc chr7  | 87256864 | 87461611 | + | 4710  | 84.8568  | 0.019093 | 1.098187 | 0.310014 | 3.542383 | 0.000607 | 0.031039 | 1 |
| ENSG0000 | remission | Inflamed | DOC2A      | protein_cc chr16 | 30016830 | 30034591 | - | 6426  | 101.0406 | 0.004773 | 1.286393 | 0.363187 | 3.541955 | 0.000607 | 0.031039 | 1 |
| ENSG0000 | remission | Inflamed | PXDC1      | protein_cc chr6  | 3722848  | 3752260  | - | 2474  | 630.6563 | 0        | -0.65528 | 0.185018 | -3.54167 | 0.000608 | 0.031039 | 1 |
| ENSG0000 | remission | Inflamed | MEFV       | protein_cc chr16 | 3292028  | 3306627  | - | 4819  | 434.7088 | 0.00716  | -1.55093 | 0.438022 | -3.54075 | 0.00061  | 0.031075 | 1 |
| ENSG0000 | remission | Inflamed | FOSL1      | protein_cc chr11 | 65659520 | 65668044 | - | 1887  | 335.6181 | 0.011933 | -1.86661 | 0.527323 | -3.53979 | 0.000612 | 0.031088 | 1 |
| ENSG0000 | remission | Inflamed | MIR3936    | miRNA chr5       | 1.32E+08 | 1.32E+08 | - | 110   | 8.980907 | 0.145585 | 0.953559 | 0.269422 | 3.539272 | 0.000613 | 0.031088 | 1 |
| ENSG0000 | remission | Inflamed | PLAUR      | protein_cc chr19 | 44150247 | 44174699 | - | 4457  | 3315.957 | 0        | -1.03509 | 0.29249  | -3.5389  | 0.000614 | 0.031088 | 1 |

|          |           |          |           |                  |          |          |   |      |          |          |          |          |          |          |          |   |
|----------|-----------|----------|-----------|------------------|----------|----------|---|------|----------|----------|----------|----------|----------|----------|----------|---|
| ENSG0000 | remission | Inflamed | DOC2B     | protein_cc chr17 | 5810     | 31427    | - | 1480 | 228.7924 | 0.004773 | -1.39691 | 0.39487  | -3.53764 | 0.000616 | 0.031159 | 1 |
| ENSG0000 | remission | Inflamed | LAMC3     | protein_cc chr9  | 1.34E+08 | 1.34E+08 | + | 7594 | 1137.955 | 0        | -1.34517 | 0.380439 | -3.53584 | 0.00062  | 0.031228 | 1 |
| ENSG0000 | remission | Inflamed | WI2-2373I | lincRNA chr7     | 331310   | 334388   | + | 530  | 1.042959 | 0.763723 | 0.486194 | 0.137526 | 3.535287 | 0.000621 | 0.031228 | 1 |
| ENSG0000 | remission | Inflamed | KLK1      | protein_cc chr19 | 51322404 | 51327043 | - | 2378 | 2638.396 | 0        | 1.336242 | 0.377974 | 3.535274 | 0.000621 | 0.031228 | 1 |
| ENSG0000 | remission | Inflamed | AC092569  | pseudoger chr2   | 30969310 | 30969567 | - | 258  | 1.692124 | 0.596659 | 0.693075 | 0.196114 | 3.534035 | 0.000624 | 0.031299 | 1 |
| ENSG0000 | remission | Inflamed | RP11-443E | lincRNA chr1     | 2.35E+08 | 2.35E+08 | - | 846  | 5.584726 | 0.212411 | -0.90973 | 0.257541 | -3.53235 | 0.000627 | 0.031416 | 1 |
| ENSG0000 | remission | Inflamed | TNFRSF9   | protein_cc chr1  | 7979907  | 8000926  | - | 2284 | 100.7804 | 0.009547 | -1.27759 | 0.361865 | -3.53057 | 0.000631 | 0.031544 | 1 |
| ENSG0000 | remission | Inflamed | TP73      | protein_cc chr1  | 3569084  | 3652765  | + | 6763 | 140.6921 | 0.002387 | -1.16019 | 0.328809 | -3.52848 | 0.000636 | 0.031676 | 1 |
| ENSG0000 | remission | Inflamed | IRF1      | protein_cc chr5  | 1.32E+08 | 1.32E+08 | - | 7799 | 8984.632 | 0        | -0.73527 | 0.208399 | -3.52819 | 0.000636 | 0.031676 | 1 |
| ENSG0000 | remission | Inflamed | CDKN2B-A  | antisense chr9   | 21994777 | 22121096 | + | 4225 | 334.4702 | 0.002387 | 1.688711 | 0.478748 | 3.527348 | 0.000638 | 0.031706 | 1 |
| ENSG0000 | remission | Inflamed | C21orf88  | protein_cc chr21 | 40969074 | 40984748 | - | 2516 | 230.5346 | 0.031026 | 2.522491 | 0.715411 | 3.525933 | 0.000641 | 0.031797 | 1 |
| ENSG0000 | remission | Inflamed | RP3-407E4 | pseudoger chr6   | 64150671 | 64153485 | + | 968  | 3.245823 | 0.610979 | 0.978622 | 0.277636 | 3.52484  | 0.000643 | 0.031853 | 1 |
| ENSG0000 | remission | Inflamed | CHST12    | protein_cc chr7  | 2443223  | 2474242  | + | 2211 | 678.0048 | 0        | -0.64568 | 0.183317 | -3.52221 | 0.000649 | 0.032015 | 1 |
| ENSG0000 | remission | Inflamed | RP11-24F1 | antisense chr3   | 46406446 | 46448550 | - | 656  | 50.59189 | 0        | -0.65635 | 0.186346 | -3.52221 | 0.000649 | 0.032015 | 1 |
| ENSG0000 | remission | Inflamed | TNIP3     | protein_cc chr4  | 1.22E+08 | 1.22E+08 | - | 3768 | 588.3986 | 0.00716  | -2.51165 | 0.71331  | -3.52113 | 0.000651 | 0.032071 | 1 |
| ENSG0000 | remission | Inflamed | TLX1      | protein_cc chr10 | 1.03E+08 | 1.03E+08 | + | 4425 | 20.70167 | 0.105012 | 1.321455 | 0.37537  | 3.520408 | 0.000653 | 0.032088 | 1 |
| ENSG0000 | remission | Inflamed | ETV7      | protein_cc chr6  | 36322419 | 36356164 | - | 2369 | 439.21   | 0        | -0.83391 | 0.23693  | -3.51964 | 0.000655 | 0.03211  | 1 |
| ENSG0000 | remission | Inflamed | OR52K3P   | pseudoger chr11  | 4496043  | 4497123  | + | 1081 | 8.377088 | 0.322196 | -1.16914 | 0.332366 | -3.51763 | 0.000659 | 0.032231 | 1 |
| ENSG0000 | remission | Inflamed | RP11-807I | pseudoger chr11  | 71883483 | 71889086 | + | 829  | 4.205251 | 0.315036 | 0.863812 | 0.245582 | 3.517404 | 0.00066  | 0.032231 | 1 |
| ENSG0000 | remission | Inflamed | RP11-299I | lincRNA chr2     | 1.02E+08 | 1.02E+08 | + | 2476 | 23.36516 | 0.019093 | 0.731254 | 0.207979 | 3.515996 | 0.000663 | 0.032296 | 1 |
| ENSG0000 | remission | Inflamed | POMC      | protein_cc chr2  | 25383722 | 25391772 | - | 1538 | 37.88067 | 0.00716  | -1.1801  | 0.335665 | -3.5157  | 0.000663 | 0.032296 | 1 |
| ENSG0000 | remission | Inflamed | SLC2A3    | protein_cc chr12 | 8071826  | 8088871  | - | 6159 | 1661.814 | 0        | -1.40691 | 0.400722 | -3.51093 | 0.000674 | 0.032702 | 1 |
| ENSG0000 | remission | Inflamed | TIMP1     | protein_cc chrX  | 47441712 | 47446188 | + | 1790 | 9957.695 | 0        | -1.11492 | 0.317562 | -3.51086 | 0.000674 | 0.032702 | 1 |
| ENSG0000 | remission | Inflamed | TPPA      | protein_cc chr8  | 63961112 | 63998612 | - | 2389 | 96.29117 | 0.02148  | 1.392063 | 0.39657  | 3.510257 | 0.000676 | 0.032707 | 1 |
| ENSG0000 | remission | Inflamed | DESI1     | protein_cc chr22 | 41994032 | 42017100 | - | 4972 | 2281.279 | 0        | -0.29739 | 0.084748 | -3.50913 | 0.000678 | 0.032768 | 1 |
| ENSG0000 | remission | Inflamed | RP11-231E | lincRNA chr3     | 1.12E+08 | 1.12E+08 | - | 1563 | 17.32458 | 0.069212 | 1.166457 | 0.332457 | 3.508597 | 0.000679 | 0.032768 | 1 |
| ENSG0000 | remission | Inflamed | SLC13A2   | protein_cc chr17 | 26800311 | 26824799 | + | 3226 | 577.8687 | 0.0358   | 2.440907 | 0.696073 | 3.506683 | 0.000684 | 0.032918 | 1 |
| ENSG0000 | remission | Inflamed | PIIB      | protein_cc chr15 | 64448011 | 64455404 | - | 1911 | 10864.84 | 0        | -0.57846 | 0.164993 | -3.50598 | 0.000685 | 0.032935 | 1 |
| ENSG0000 | remission | Inflamed | DERL3     | protein_cc chr22 | 24176690 | 24181315 | - | 3796 | 5759.993 | 0        | -1.34195 | 0.383043 | -3.50339 | 0.000691 | 0.033103 | 1 |
| ENSG0000 | remission | Inflamed | RP11-282K | sense_intr chr12 | 19300008 | 19307593 | + | 5391 | 6.183771 | 0.124105 | 0.793731 | 0.226563 | 3.503362 | 0.000691 | 0.033103 | 1 |
| ENSG0000 | remission | Inflamed | IL17F     | protein_cc chr6  | 52101479 | 52109335 | - | 1067 | 9.959427 | 0.343675 | -1.29082 | 0.368514 | -3.50277 | 0.000693 | 0.033108 | 1 |
| ENSG0000 | remission | Inflamed | CTDSPL    | protein_cc chr3  | 37903451 | 38025960 | + | 5796 | 2721.451 | 0        | 0.64966  | 0.185584 | 3.500628 | 0.000698 | 0.033285 | 1 |
| ENSG0000 | remission | Inflamed | RP4-659I1 | pseudoger chr1   | 2.33E+08 | 2.33E+08 | + | 784  | 6.307876 | 0.415274 | 0.91306  | 0.26094  | 3.499115 | 0.000701 | 0.033393 | 1 |
| ENSG0000 | remission | Inflamed | RP11-728F | antisense chr11  | 1.18E+08 | 1.18E+08 | + | 1464 | 15.64678 | 0.047733 | 0.849937 | 0.242942 | 3.498512 | 0.000703 | 0.033399 | 1 |
| ENSG0000 | remission | Inflamed | MPO       | protein_cc chr17 | 56347217 | 56358296 | - | 3622 | 8.334129 | 0.069212 | -0.80487 | 0.230129 | -3.49747 | 0.000705 | 0.033417 | 1 |
| ENSG0000 | remission | Inflamed | IGLV5-48  | IG_V_gene chr22  | 22707289 | 22707781 | + | 369  | 67.36993 | 0.026253 | -1.62376 | 0.464319 | -3.49707 | 0.000706 | 0.033417 | 1 |
| ENSG0000 | remission | Inflamed | RGCC      | protein_cc chr13 | 42031695 | 42045018 | + | 1032 | 507.1337 | 0        | -0.97026 | 0.277475 | -3.49673 | 0.000707 | 0.033417 | 1 |
| ENSG0000 | remission | Inflamed | NMUR2     | protein_cc chr5  | 1.52E+08 | 1.52E+08 | - | 2345 | 125.6993 | 0.257757 | -2.36922 | 0.677683 | -3.49607 | 0.000708 | 0.033431 | 1 |
| ENSG0000 | remission | Inflamed | SIGLEC9   | protein_cc chr19 | 51628165 | 51639908 | + | 2539 | 230.0048 | 0        | -1.02418 | 0.293116 | -3.49412 | 0.000713 | 0.033569 | 1 |
| ENSG0000 | remission | Inflamed | EGFL6     | protein_cc chrX  | 13587724 | 13651694 | + | 2607 | 141.9523 | 0.047733 | -2.15097 | 0.615661 | -3.49376 | 0.000714 | 0.033569 | 1 |

|          |           |          |                     |                  |          |          |   |       |          |          |          |          |          |          |          |   |
|----------|-----------|----------|---------------------|------------------|----------|----------|---|-------|----------|----------|----------|----------|----------|----------|----------|---|
| ENSG0000 | remission | Inflamed | RP11-207C antisense | chr9             | 5719021  | 5720244  | - | 543   | 1.252983 | 0.677804 | 0.504262 | 0.144376 | 3.492699 | 0.000716 | 0.033595 | 1 |
| ENSG0000 | remission | Inflamed | PPP1R26-1 antisense | chr9             | 1.38E+08 | 1.38E+08 | - | 3750  | 168.9069 | 0.00716  | 1.029834 | 0.294874 | 3.492449 | 0.000717 | 0.033595 | 1 |
| ENSG0000 | remission | Inflamed | CCL8                | protein_cc chr17 | 32646055 | 32648421 | + | 1261  | 166.3699 | 0        | -1.22935 | 0.352158 | -3.4909  | 0.000721 | 0.033709 | 1 |
| ENSG0000 | remission | Inflamed | SLC4A10             | protein_cc chr2  | 1.62E+08 | 1.63E+08 | + | 7550  | 65.29117 | 0.026253 | 1.125253 | 0.322425 | 3.489968 | 0.000723 | 0.033753 | 1 |
| ENSG0000 | remission | Inflamed | SERPINI1            | protein_cc chr3  | 1.67E+08 | 1.68E+08 | + | 2418  | 103.3747 | 0.004773 | -1.07695 | 0.308991 | -3.48539 | 0.000734 | 0.034211 | 1 |
| ENSG0000 | remission | Inflamed | Z85986.1            | miRNA chr6       | 36478294 | 36478375 | - | 82    | 1.162291 | 0.694511 | 0.543238 | 0.155894 | 3.484661 | 0.000736 | 0.034233 | 1 |
| ENSG0000 | remission | Inflamed | OXER1               | protein_cc chr2  | 42989642 | 42991401 | - | 1760  | 214.6062 | 0        | 0.715366 | 0.20566  | 3.478394 | 0.000751 | 0.034869 | 1 |
| ENSG0000 | remission | Inflamed | LRRC25              | protein_cc chr19 | 18501954 | 18508427 | - | 2415  | 718.7446 | 0        | -0.96033 | 0.276112 | -3.47804 | 0.000752 | 0.034869 | 1 |
| ENSG0000 | remission | Inflamed | TMEM45A             | protein_cc chr3  | 1E+08    | 1E+08    | + | 6005  | 270.7566 | 0        | -0.90205 | 0.259457 | -3.47668 | 0.000755 | 0.034869 | 1 |
| ENSG0000 | remission | Inflamed | CAP2P1              | pseudoger chr14  | 89756549 | 89757938 | - | 1390  | 1.749403 | 0.568019 | 0.605025 | 0.174027 | 3.476621 | 0.000756 | 0.034869 | 1 |
| ENSG0000 | remission | Inflamed | STOM                | protein_cc chr9  | 1.24E+08 | 1.24E+08 | - | 3188  | 5881.737 | 0        | -0.84501 | 0.243066 | -3.47647 | 0.000756 | 0.034869 | 1 |
| ENSG0000 | remission | Inflamed | NQO2                | protein_cc chr6  | 2988221  | 3019996  | + | 2451  | 487.8544 | 0        | -0.60476 | 0.173986 | -3.47593 | 0.000757 | 0.034871 | 1 |
| ENSG0000 | remission | Inflamed | SBNO2               | protein_cc chr19 | 1107636  | 1174282  | - | 6476  | 7246.43  | 0        | -0.794   | 0.22863  | -3.47286 | 0.000765 | 0.035142 | 1 |
| ENSG0000 | remission | Inflamed | SLC39A11            | protein_cc chr17 | 70642088 | 71088851 | - | 5583  | 1525.045 | 0        | 0.51819  | 0.149227 | 3.472502 | 0.000766 | 0.035142 | 1 |
| ENSG0000 | remission | Inflamed | PIGZ                | protein_cc chr3  | 1.97E+08 | 1.97E+08 | - | 3211  | 2712.305 | 0        | 1.191401 | 0.343152 | 3.471937 | 0.000767 | 0.035142 | 1 |
| ENSG0000 | remission | Inflamed | RP11-567C lincRNA   | chr12            | 90501516 | 90506556 | + | 926   | 12.21002 | 0.174224 | 1.224483 | 0.352726 | 3.471482 | 0.000769 | 0.035142 | 1 |
| ENSG0000 | remission | Inflamed | UBTD1               | protein_cc chr10 | 99258625 | 99330966 | + | 1706  | 238.5704 | 0        | -0.89467 | 0.257776 | -3.47074 | 0.00077  | 0.035167 | 1 |
| ENSG0000 | remission | Inflamed | RP11-175E antisense | chr9             | 1.28E+08 | 1.28E+08 | + | 617   | 2.083532 | 0.51074  | 0.556207 | 0.160318 | 3.469395 | 0.000774 | 0.035218 | 1 |
| ENSG0000 | remission | Inflamed | FAM184B             | protein_cc chr4  | 17630929 | 17783135 | - | 6622  | 20.50597 | 0.26253  | 1.194507 | 0.344311 | 3.469266 | 0.000774 | 0.035218 | 1 |
| ENSG0000 | remission | Inflamed | SEMA4A              | protein_cc chr1  | 1.56E+08 | 1.56E+08 | + | 6676  | 1647.468 | 0        | -0.83528 | 0.240903 | -3.46728 | 0.000779 | 0.035273 | 1 |
| ENSG0000 | remission | Inflamed | CTC-558O antisense  | chr5             | 1.68E+08 | 1.68E+08 | + | 810   | 6.109785 | 0.295943 | 0.936536 | 0.270111 | 3.467221 | 0.00078  | 0.035273 | 1 |
| ENSG0000 | remission | Inflamed | ITPKA               | protein_cc chr15 | 41785591 | 41795747 | + | 2090  | 867.6062 | 0        | 0.941121 | 0.271451 | 3.466997 | 0.00078  | 0.035273 | 1 |
| ENSG0000 | remission | Inflamed | MB                  | protein_cc chr22 | 36002811 | 36033998 | - | 3020  | 257.7112 | 0.00716  | 1.539951 | 0.444211 | 3.466714 | 0.000781 | 0.035273 | 1 |
| ENSG0000 | remission | Inflamed | S1PR5               | protein_cc chr19 | 10623623 | 10628607 | - | 2601  | 38.53938 | 0.019093 | -1.16378 | 0.335828 | -3.4654  | 0.000784 | 0.035331 | 1 |
| ENSG0000 | remission | Inflamed | PDPN                | protein_cc chr1  | 13909960 | 13944452 | + | 3707  | 1462.289 | 0        | -1.328   | 0.38324  | -3.46518 | 0.000785 | 0.035331 | 1 |
| ENSG0000 | remission | Inflamed | SATB2-AS1 antisense | chr2             | 2E+08    | 2E+08    | + | 4470  | 828.9427 | 0.004773 | 2.006092 | 0.579175 | 3.463707 | 0.000789 | 0.035443 | 1 |
| ENSG0000 | remission | Inflamed | AC009495            | lincRNA chr2     | 1.67E+08 | 1.67E+08 | - | 372   | 9.947494 | 0.090692 | 0.836934 | 0.241744 | 3.462066 | 0.000793 | 0.035576 | 1 |
| ENSG0000 | remission | Inflamed | IGLV4-69            | IG_V_gene chr22  | 22385332 | 22385870 | + | 419   | 2909.463 | 0        | -1.66798 | 0.481875 | -3.46144 | 0.000795 | 0.035589 | 1 |
| ENSG0000 | remission | Inflamed | TRPC4               | protein_cc chr13 | 38210773 | 38444562 | - | 4205  | 41.79236 | 0.026253 | -1.1198  | 0.324212 | -3.45392 | 0.000815 | 0.036424 | 1 |
| ENSG0000 | remission | Inflamed | RP11-498E lincRNA   | chr9             | 1.25E+08 | 1.25E+08 | + | 708   | 31.12172 | 0.011933 | 0.816593 | 0.236652 | 3.450602 | 0.000824 | 0.036705 | 1 |
| ENSG0000 | remission | Inflamed | GMPPA               | protein_cc chr2  | 2.2E+08  | 2.2E+08  | + | 5331  | 2556.453 | 0        | -0.28568 | 0.082819 | -3.44944 | 0.000827 | 0.036705 | 1 |
| ENSG0000 | remission | Inflamed | RP11-206L processed | chr1             | 745489   | 753092   | - | 402   | 2.436754 | 0.415274 | 0.647455 | 0.187724 | 3.448975 | 0.000828 | 0.036705 | 1 |
| ENSG0000 | remission | Inflamed | HLA-DRB6            | pseudoger chr6   | 32520490 | 32527799 | - | 1326  | 278.3484 | 0.026253 | -0.87977 | 0.255108 | -3.44863 | 0.000829 | 0.036705 | 1 |
| ENSG0000 | remission | Inflamed | RNU1-134            | snRNA chr20      | 62540308 | 62540472 | + | 165   | 0.976134 | 0.749403 | 0.521068 | 0.151115 | 3.448158 | 0.00083  | 0.036705 | 1 |
| ENSG0000 | remission | Inflamed | CPA6                | protein_cc chr8  | 68334360 | 68658620 | - | 2435  | 44.17422 | 0.0358   | 1.484948 | 0.430653 | 3.448128 | 0.00083  | 0.036705 | 1 |
| ENSG0000 | remission | Inflamed | NXPE4               | protein_cc chr11 | 1.14E+08 | 1.14E+08 | - | 2163  | 2900.757 | 0        | 1.884561 | 0.546589 | 3.447857 | 0.000831 | 0.036705 | 1 |
| ENSG0000 | remission | Inflamed | IGKV2D-24           | IG_V_gene chr2   | 90043607 | 90044439 | + | 390   | 158.9117 | 0.004773 | -1.40834 | 0.408517 | -3.44743 | 0.000832 | 0.036705 | 1 |
| ENSG0000 | remission | Inflamed | JSRP1               | protein_cc chr19 | 2252251  | 2269758  | - | 1955  | 363.5036 | 0        | -1.48429 | 0.430605 | -3.44699 | 0.000834 | 0.036705 | 1 |
| ENSG0000 | remission | Inflamed | BTG2                | protein_cc chr1  | 2.03E+08 | 2.03E+08 | + | 2757  | 11164.23 | 0        | -0.83505 | 0.242293 | -3.44646 | 0.000835 | 0.036708 | 1 |
| ENSG0000 | remission | Inflamed | DNAH3               | protein_cc chr16 | 20944433 | 21170762 | - | 14960 | 101.7088 | 0.004773 | 1.08539  | 0.315026 | 3.445405 | 0.000838 | 0.036774 | 1 |

|          |           |          |                    |                  |          |          |   |       |          |          |          |          |          |          |          |   |
|----------|-----------|----------|--------------------|------------------|----------|----------|---|-------|----------|----------|----------|----------|----------|----------|----------|---|
| ENSG0000 | remission | Inflamed | SIRPB2             | protein_cc chr20 | 1451386  | 1472233  | - | 5199  | 250.2411 | 0.002387 | -1.04016 | 0.302036 | -3.44383 | 0.000842 | 0.036891 | 1 |
| ENSG0000 | remission | Inflamed | CD8B               | protein_cc chr2  | 87042462 | 87089047 | - | 1864  | 145.42   | 0        | -0.76959 | 0.223496 | -3.44343 | 0.000843 | 0.036891 | 1 |
| ENSG0000 | remission | Inflamed | JUNB               | protein_cc chr19 | 12902310 | 12904124 | + | 1815  | 9477.644 | 0        | -0.79839 | 0.231921 | -3.44251 | 0.000846 | 0.036893 | 1 |
| ENSG0000 | remission | Inflamed | CLEC6A             | protein_cc chr12 | 8608522  | 8630926  | + | 1682  | 9.28401  | 0.367542 | -1.36887 | 0.397647 | -3.44241 | 0.000846 | 0.036893 | 1 |
| ENSG0000 | remission | Inflamed | CMTM4              | protein_cc chr16 | 66648653 | 66730610 | - | 8117  | 8551.907 | 0        | 0.9729   | 0.282682 | 3.441679 | 0.000848 | 0.036921 | 1 |
| ENSG0000 | remission | Inflamed | IGKV2D-2&IG_V_gene | chr2             | 89998789 | 89999564 | + | 402   | 450.6014 | 0.002387 | -1.49375 | 0.434205 | -3.4402  | 0.000852 | 0.03697  | 1 |
| ENSG0000 | remission | Inflamed | AP001058           | lincRNA chr21    | 45626408 | 45627282 | - | 463   | 11.87112 | 0.038186 | -0.96671 | 0.28103  | -3.43987 | 0.000853 | 0.03697  | 1 |
| ENSG0000 | remission | Inflamed | LINC00589          | lincRNA chr8     | 29531438 | 29605625 | - | 2074  | 8.48926  | 0.105012 | 0.999992 | 0.290715 | 3.439771 | 0.000854 | 0.03697  | 1 |
| ENSG0000 | remission | Inflamed | C1orf167           | protein_cc chr1  | 11821844 | 11849642 | + | 6505  | 25.96659 | 0.004773 | -1.02777 | 0.298854 | -3.43902 | 0.000856 | 0.037001 | 1 |
| ENSG0000 | remission | Inflamed | SNORA67            | processed_chr17  | 7476144  | 7485342  | + | 4554  | 676.3914 | 0        | -0.35579 | 0.103519 | -3.43693 | 0.000862 | 0.037196 | 1 |
| ENSG0000 | remission | Inflamed | HPCA               | protein_cc chr1  | 33351595 | 33364042 | + | 1991  | 30.93317 | 0.00716  | 0.959151 | 0.279142 | 3.436069 | 0.000864 | 0.03724  | 1 |
| ENSG0000 | remission | Inflamed | SLC7A3             | protein_cc chrX  | 70145432 | 70150975 | - | 2265  | 4.756563 | 0.24821  | 0.918182 | 0.267314 | 3.434838 | 0.000868 | 0.03733  | 1 |
| ENSG0000 | remission | Inflamed | SLC22A23           | protein_cc chr6  | 3269196  | 3457256  | - | 8898  | 5764.945 | 0        | 0.887291 | 0.258555 | 3.431731 | 0.000877 | 0.037652 | 1 |
| ENSG0000 | remission | Inflamed | VIPR1              | protein_cc chr3  | 42530791 | 42579059 | + | 7378  | 4176.878 | 0        | 1.429474 | 0.416704 | 3.430433 | 0.00088  | 0.037725 | 1 |
| ENSG0000 | remission | Inflamed | ZG16               | protein_cc chr16 | 29789561 | 29793096 | + | 1934  | 30948.41 | 0        | 2.418416 | 0.705045 | 3.430158 | 0.000881 | 0.037725 | 1 |
| ENSG0000 | remission | Inflamed | LCN2               | protein_cc chr9  | 1.31E+08 | 1.31E+08 | + | 2057  | 31698.69 | 0        | -1.80788 | 0.527229 | -3.42903 | 0.000884 | 0.037804 | 1 |
| ENSG0000 | remission | Inflamed | EPHX4              | protein_cc chr1  | 92495539 | 92529093 | + | 2251  | 28.05251 | 0.019093 | -1.11622 | 0.325733 | -3.42679 | 0.000891 | 0.038021 | 1 |
| ENSG0000 | remission | Inflamed | PCDH19             | protein_cc chrX  | 99546642 | 99665271 | - | 9756  | 277.6897 | 0.002387 | 1.328497 | 0.388351 | 3.420863 | 0.000908 | 0.03857  | 1 |
| ENSG0000 | remission | Inflamed | ACAT1              | protein_cc chr11 | 1.08E+08 | 1.08E+08 | + | 5584  | 1571.432 | 0        | 0.666635 | 0.194888 | 3.420602 | 0.000909 | 0.03857  | 1 |
| ENSG0000 | remission | Inflamed | RP1-224A6          | lincRNA chr1     | 22427106 | 22427853 | + | 748   | 2.00716  | 0.486874 | 0.595712 | 0.174158 | 3.420519 | 0.000909 | 0.03857  | 1 |
| ENSG0000 | remission | Inflamed | NANOGNB            | pseudoger chrX   | 1.01E+08 | 1.01E+08 | - | 565   | 1.606205 | 0.575179 | 0.551465 | 0.161225 | 3.42046  | 0.00091  | 0.03857  | 1 |
| ENSG0000 | remission | Inflamed | RFXANK             | protein_cc chr19 | 19303008 | 19312678 | + | 2533  | 991.8353 | 0        | -0.31896 | 0.093295 | -3.41885 | 0.000914 | 0.038644 | 1 |
| ENSG0000 | remission | Inflamed | SNRK-AS1           | antisense chr3   | 43391136 | 43393454 | - | 750   | 8.093079 | 0.183771 | 0.983555 | 0.287718 | 3.418466 | 0.000916 | 0.038644 | 1 |
| ENSG0000 | remission | Inflamed | CEBPB              | protein_cc chr20 | 48807376 | 48809212 | + | 1837  | 2711.088 | 0        | -1.00807 | 0.294895 | -3.4184  | 0.000916 | 0.038644 | 1 |
| ENSG0000 | remission | Inflamed | SPNS3              | protein_cc chr17 | 4336983  | 4391503  | + | 2684  | 70.57518 | 0        | -0.70442 | 0.20617  | -3.41672 | 0.000921 | 0.038783 | 1 |
| ENSG0000 | remission | Inflamed | CCDC108            | protein_cc chr2  | 2.2E+08  | 2.2E+08  | - | 10519 | 18.65632 | 0.02864  | 1.073814 | 0.314317 | 3.416336 | 0.000922 | 0.038783 | 1 |
| ENSG0000 | remission | Inflamed | THEMIS2            | protein_cc chr1  | 28199055 | 28213196 | + | 4620  | 2307.726 | 0        | -0.94697 | 0.277301 | -3.41496 | 0.000926 | 0.038873 | 1 |
| ENSG0000 | remission | Inflamed | ABI3               | protein_cc chr17 | 47287589 | 47300587 | + | 2456  | 1026.029 | 0        | -0.61788 | 0.180949 | -3.41464 | 0.000927 | 0.038873 | 1 |
| ENSG0000 | remission | Inflamed | SELENBP1           | protein_cc chr1  | 1.51E+08 | 1.51E+08 | - | 3504  | 20717.5  | 0        | 1.147148 | 0.335996 | 3.414168 | 0.000929 | 0.038873 | 1 |
| ENSG0000 | remission | Inflamed | GNLY               | protein_cc chr2  | 85912298 | 85925977 | + | 3051  | 419.4487 | 0        | -1.27385 | 0.373171 | -3.41357 | 0.00093  | 0.038887 | 1 |
| ENSG0000 | remission | Inflamed | C2orf54            | protein_cc chr2  | 2.42E+08 | 2.42E+08 | - | 2772  | 209.0239 | 0.009547 | 1.399129 | 0.410048 | 3.412113 | 0.000935 | 0.039012 | 1 |
| ENSG0000 | remission | Inflamed | GJA4               | protein_cc chr1  | 35258599 | 35261348 | + | 1717  | 320.4153 | 0.002387 | -1.26549 | 0.371075 | -3.41035 | 0.00094  | 0.039176 | 1 |
| ENSG0000 | remission | Inflamed | TEAD4              | protein_cc chr12 | 3068496  | 3149839  | + | 2272  | 426.4821 | 0        | -0.66425 | 0.194942 | -3.40742 | 0.000949 | 0.039491 | 1 |
| ENSG0000 | remission | Inflamed | FLI1-AS1           | antisense chr11  | 1.29E+08 | 1.29E+08 | - | 1298  | 36.56563 | 0.002387 | -0.84784 | 0.248896 | -3.4064  | 0.000953 | 0.03956  | 1 |
| ENSG0000 | remission | Inflamed | SELP               | protein_cc chr1  | 1.7E+08  | 1.7E+08  | - | 3490  | 719.6229 | 0.002387 | -1.60748 | 0.47237  | -3.40301 | 0.000963 | 0.039939 | 1 |
| ENSG0000 | remission | Inflamed | IGKV5-2            | IG_V_gene chr2   | 89196748 | 89197300 | + | 408   | 260.4248 | 0.004773 | -1.62682 | 0.478487 | -3.39993 | 0.000973 | 0.04028  | 1 |
| ENSG0000 | remission | Inflamed | IGHG2              | IG_C_gene chr14  | 1.06E+08 | 1.06E+08 | - | 1132  | 123207.2 | 0        | -2.10699 | 0.620039 | -3.39815 | 0.000979 | 0.040383 | 1 |
| ENSG0000 | remission | Inflamed | KCNJ6              | protein_cc chr21 | 38979678 | 39288749 | - | 19671 | 8.458234 | 0.138425 | 1.126192 | 0.331441 | 3.397862 | 0.00098  | 0.040383 | 1 |
| ENSG0000 | remission | Inflamed | CCDC167            | protein_cc chr6  | 37450696 | 37467698 | - | 619   | 296.3389 | 0        | -0.71168 | 0.209458 | -3.39771 | 0.00098  | 0.040383 | 1 |
| ENSG0000 | remission | Inflamed | AF064860           | lincRNA chr21    | 41099682 | 41102607 | + | 1786  | 9.77327  | 0.214797 | 1.384109 | 0.4076   | 3.395755 | 0.000986 | 0.040578 | 1 |

|          |           |          |           |                  |          |          |   |      |          |          |          |          |          |          |          |   |
|----------|-----------|----------|-----------|------------------|----------|----------|---|------|----------|----------|----------|----------|----------|----------|----------|---|
| ENSG0000 | remission | Inflamed | RP13-452  | processed_chr7   | 1.52E+08 | 1.52E+08 | + | 2222 | 8.9642   | 0.224344 | -1.15242 | 0.339533 | -3.39413 | 0.000992 | 0.04073  | 1 |
| ENSG0000 | remission | Inflamed | C5AR1     | protein_cc chr19 | 47793280 | 47825323 | + | 2951 | 991.5012 | 0        | -1.30279 | 0.383913 | -3.39344 | 0.000994 | 0.040759 | 1 |
| ENSG0000 | remission | Inflamed | IRF7      | protein_cc chr11 | 612553   | 615999   | - | 2628 | 1850.167 | 0        | -0.60387 | 0.17801  | -3.39237 | 0.000997 | 0.040838 | 1 |
| ENSG0000 | remission | Inflamed | PRDX6     | protein_cc chr1  | 1.73E+08 | 1.73E+08 | + | 2367 | 11467.15 | 0        | 0.702982 | 0.207351 | 3.390292 | 0.001004 | 0.041052 | 1 |
| ENSG0000 | remission | Inflamed | KCNJ8     | protein_cc chr12 | 21917889 | 21928515 | - | 2484 | 119.2578 | 0        | -1.18958 | 0.350942 | -3.38967 | 0.001006 | 0.041072 | 1 |
| ENSG0000 | remission | Inflamed | FXYP4     | protein_cc chr10 | 43867090 | 43871783 | + | 774  | 2.670644 | 0.508353 | 0.844641 | 0.249247 | 3.388769 | 0.001009 | 0.041085 | 1 |
| ENSG0000 | remission | Inflamed | AP000344  | pseudoger chr22  | 23788785 | 23803020 | + | 795  | 26.05489 | 0.133652 | 1.245243 | 0.367525 | 3.38819  | 0.001011 | 0.041085 | 1 |
| ENSG0000 | remission | Inflamed | RP11-420  | processed_chr16  | 5289803  | 6826015  | + | 2019 | 9.508353 | 0.105012 | 0.883509 | 0.260764 | 3.388149 | 0.001011 | 0.041085 | 1 |
| ENSG0000 | remission | Inflamed | AC005152  | processed_chr17  | 70033455 | 70217977 | - | 8450 | 27.60621 | 0.026253 | 1.021611 | 0.301576 | 3.387576 | 0.001013 | 0.041096 | 1 |
| ENSG0000 | remission | Inflamed | USP54     | protein_cc chr10 | 75257296 | 75385711 | - | 9850 | 2835.01  | 0        | 0.841017 | 0.248298 | 3.387121 | 0.001014 | 0.041096 | 1 |
| ENSG0000 | remission | Inflamed | WDR45     | protein_cc chrX  | 48929385 | 48958108 | - | 4981 | 1198.661 | 0        | -0.3939  | 0.11634  | -3.38575 | 0.001019 | 0.041178 | 1 |
| ENSG0000 | remission | Inflamed | C2orf66   | protein_cc chr2  | 1.98E+08 | 1.98E+08 | - | 1669 | 7.073986 | 0.176611 | 0.866632 | 0.255979 | 3.385561 | 0.00102  | 0.041178 | 1 |
| ENSG0000 | remission | Inflamed | TMEM208   | protein_cc chr16 | 67261006 | 67263181 | + | 1787 | 915.9021 | 0        | -0.5058  | 0.149471 | -3.38391 | 0.001025 | 0.041337 | 1 |
| ENSG0000 | remission | Inflamed | PAQR5     | protein_cc chr15 | 69591286 | 69700119 | + | 6209 | 1667.924 | 0        | 0.979105 | 0.289392 | 3.383312 | 0.001027 | 0.041338 | 1 |
| ENSG0000 | remission | Inflamed | INHBE     | protein_cc chr12 | 57846106 | 57853063 | + | 3015 | 4.968974 | 0.315036 | -1.00836 | 0.298188 | -3.38161 | 0.001033 | 0.041338 | 1 |
| ENSG0000 | remission | Inflamed | CTD-2192J | sense_intr chr19 | 12640582 | 12643787 | - | 533  | 4.937947 | 0.210024 | 0.751924 | 0.222373 | 3.381362 | 0.001034 | 0.041338 | 1 |
| ENSG0000 | remission | Inflamed | CLPTM1L   | protein_cc chr5  | 1317859  | 1345214  | - | 6557 | 6656.172 | 0        | -0.38568 | 0.114068 | -3.38112 | 0.001035 | 0.041338 | 1 |
| ENSG0000 | remission | Inflamed | IGKV1-16  | IG_V_gene chr2   | 89399352 | 89399854 | - | 378  | 5157.01  | 0        | -1.53587 | 0.454262 | -3.38102 | 0.001035 | 0.041338 | 1 |
| ENSG0000 | remission | Inflamed | ACSF2     | protein_cc chr17 | 48503519 | 48552206 | + | 5797 | 1814.752 | 0        | 0.901077 | 0.266517 | 3.380938 | 0.001035 | 0.041338 | 1 |
| ENSG0000 | remission | Inflamed | TXNDC15   | protein_cc chr5  | 1.34E+08 | 1.34E+08 | + | 5265 | 1818.881 | 0        | -0.56979 | 0.168548 | -3.38056 | 0.001036 | 0.041338 | 1 |
| ENSG0000 | remission | Inflamed | LST1      | protein_cc chr6  | 31553901 | 31556686 | + | 2281 | 549.3031 | 0        | -1.00494 | 0.297323 | -3.37996 | 0.001038 | 0.041338 | 1 |
| ENSG0000 | remission | Inflamed | S100A3    | protein_cc chr1  | 1.54E+08 | 1.54E+08 | - | 955  | 42.53222 | 0.023866 | -1.37268 | 0.406211 | -3.37923 | 0.001041 | 0.041338 | 1 |
| ENSG0000 | remission | Inflamed | RP11-77K1 | protein_cc chr16 | 75562430 | 75579326 | - | 2125 | 1.384248 | 0.653938 | 0.596865 | 0.176633 | 3.379128 | 0.001041 | 0.041338 | 1 |
| ENSG0000 | remission | Inflamed | MZB1      | protein_cc chr5  | 1.39E+08 | 1.39E+08 | - | 2273 | 6434.499 | 0        | -1.44219 | 0.426844 | -3.37874 | 0.001043 | 0.041338 | 1 |
| ENSG0000 | remission | Inflamed | COL23A1   | protein_cc chr5  | 1.78E+08 | 1.78E+08 | - | 3878 | 398.6038 | 0        | -0.95581 | 0.282924 | -3.37831 | 0.001044 | 0.041338 | 1 |
| ENSG0000 | remission | Inflamed | AC019330  | lincRNA chr2     | 1.99E+08 | 2E+08    | - | 504  | 3.594272 | 0.548926 | 0.731119 | 0.216498 | 3.377027 | 0.001048 | 0.041448 | 1 |
| ENSG0000 | remission | Inflamed | MIXL1     | protein_cc chr1  | 2.26E+08 | 2.26E+08 | + | 2029 | 118.8663 | 0        | -1.34714 | 0.398974 | -3.37651 | 0.00105  | 0.041456 | 1 |
| ENSG0000 | remission | Inflamed | RP11-350J | antisense chr6   | 1.5E+08  | 1.5E+08  | + | 312  | 18.30549 | 0.174224 | -1.33442 | 0.395446 | -3.37446 | 0.001057 | 0.041671 | 1 |
| ENSG0000 | remission | Inflamed | PLIN1     | protein_cc chr15 | 90207596 | 90222658 | - | 3797 | 60.27208 | 0.02148  | 1.042935 | 0.30918  | 3.373225 | 0.001061 | 0.041674 | 1 |
| ENSG0000 | remission | Inflamed | GALK1     | protein_cc chr17 | 73747675 | 73761792 | - | 2891 | 582.253  | 0        | -0.53772 | 0.15942  | -3.373   | 0.001062 | 0.041674 | 1 |
| ENSG0000 | remission | Inflamed | TAS2R18   | pseudoger chr12  | 11311384 | 11312293 | - | 910  | 1.357995 | 0.673031 | 0.567217 | 0.168176 | 3.372759 | 0.001063 | 0.041674 | 1 |
| ENSG0000 | remission | Inflamed | RP11-806  | lincRNA chr17    | 76356534 | 76369992 | + | 1188 | 18       | 0.138425 | -1.46019 | 0.432955 | -3.3726  | 0.001064 | 0.041674 | 1 |
| ENSG0000 | remission | Inflamed | HEPACAM   | protein_cc chr7  | 92817899 | 92855837 | - | 2483 | 1672.499 | 0.002387 | 1.666446 | 0.494324 | 3.371163 | 0.001069 | 0.041807 | 1 |
| ENSG0000 | remission | Inflamed | DUSP4     | protein_cc chr8  | 29190581 | 29208185 | - | 7257 | 816.9069 | 0        | -1.12518 | 0.333837 | -3.37044 | 0.001071 | 0.041843 | 1 |
| ENSG0000 | remission | Inflamed | SIRT2     | protein_cc chr19 | 39369197 | 39390502 | - | 6204 | 2065.757 | 0        | -0.28346 | 0.084119 | -3.36972 | 0.001074 | 0.041879 | 1 |
| ENSG0000 | remission | Inflamed | IGF2BP3   | protein_cc chr7  | 23349828 | 23510086 | - | 8511 | 71.11217 | 0.050119 | -1.37217 | 0.407295 | -3.36897 | 0.001076 | 0.041919 | 1 |
| ENSG0000 | remission | Inflamed | VWFP1     | pseudoger chr22  | 17170993 | 17185367 | - | 2907 | 43.98329 | 0.107399 | -1.31416 | 0.390158 | -3.36827 | 0.001079 | 0.041952 | 1 |
| ENSG0000 | remission | Inflamed | CLDN2     | protein_cc chrX  | 1.06E+08 | 1.06E+08 | + | 3410 | 1141.337 | 0.00716  | -1.82017 | 0.540682 | -3.36644 | 0.001085 | 0.04214  | 1 |
| ENSG0000 | remission | Inflamed | CTD-2611  | pseudoger chr19  | 56218707 | 56219330 | + | 624  | 27.48687 | 0.059666 | 1.15173  | 0.342205 | 3.365608 | 0.001088 | 0.042192 | 1 |
| ENSG0000 | remission | Inflamed | IDO1      | protein_cc chr8  | 39759794 | 39785963 | + | 3261 | 1476.635 | 0        | -2.02468 | 0.601819 | -3.36426 | 0.001093 | 0.042241 | 1 |

|          |           |          |           |            |       |          |          |   |       |          |          |          |          |          |          |          |   |
|----------|-----------|----------|-----------|------------|-------|----------|----------|---|-------|----------|----------|----------|----------|----------|----------|----------|---|
| ENSG0000 | remission | Inflamed | SCARNA18  | snoRNA     | chr18 | 47340731 | 47340813 | + | 83    | 1.980907 | 0.47494  | 0.524048 | 0.155786 | 3.363893 | 0.001094 | 0.042241 | 1 |
| ENSG0000 | remission | Inflamed | NEDD4L    | protein_cc | chr18 | 55711599 | 56068772 | + | 15717 | 4518.776 | 0        | 0.938839 | 0.279094 | 3.363881 | 0.001094 | 0.042241 | 1 |
| ENSG0000 | remission | Inflamed | PUSL1     | protein_cc | chr1  | 1243947  | 1247057  | + | 2489  | 521.2721 | 0        | -0.39979 | 0.118864 | -3.36343 | 0.001096 | 0.042241 | 1 |
| ENSG0000 | remission | Inflamed | MOBP      | protein_cc | chr3  | 39508689 | 39570970 | + | 9237  | 14.57518 | 0.183771 | 1.055573 | 0.313879 | 3.362992 | 0.001097 | 0.042241 | 1 |
| ENSG0000 | remission | Inflamed | NCF1B     | pseudoger  | chr7  | 72634611 | 72649979 | + | 1950  | 283.7041 | 0        | -0.95554 | 0.284332 | -3.36064 | 0.001106 | 0.042366 | 1 |
| ENSG0000 | remission | Inflamed | MNDA      | protein_cc | chr1  | 1.59E+08 | 1.59E+08 | + | 2059  | 520.1002 | 0        | -1.53454 | 0.456629 | -3.36059 | 0.001106 | 0.042366 | 1 |
| ENSG0000 | remission | Inflamed | KIAA1984  | protein_cc | chr9  | 1.4E+08  | 1.4E+08  | + | 2964  | 55.90931 | 0        | 0.917197 | 0.272973 | 3.360026 | 0.001108 | 0.042366 | 1 |
| ENSG0000 | remission | Inflamed | TMEM236   | protein_cc | chr10 | 17794251 | 17842867 | + | 5464  | 162.2959 | 0.059666 | 1.617471 | 0.481451 | 3.359576 | 0.00111  | 0.042366 | 1 |
| ENSG0000 | remission | Inflamed | IGKV2OR2  | IG_V_pseu  | chr22 | 17395125 | 17395871 | - | 367   | 21.46539 | 0.078759 | -1.34047 | 0.399025 | -3.35935 | 0.00111  | 0.042366 | 1 |
| ENSG0000 | remission | Inflamed | DEFB4A    | protein_cc | chr8  | 7752151  | 7754233  | + | 380   | 94.69928 | 0.424821 | -2.5534  | 0.760215 | -3.35879 | 0.001112 | 0.042366 | 1 |
| ENSG0000 | remission | Inflamed | RP11-109C | antisense  | chr17 | 12663457 | 12693559 | - | 3679  | 14.82816 | 0.408115 | 1.190079 | 0.354338 | 3.358594 | 0.001113 | 0.042366 | 1 |
| ENSG0000 | remission | Inflamed | SPIB      | protein_cc | chr19 | 50922195 | 50934570 | + | 4281  | 1536.511 | 0        | 1.212131 | 0.360915 | 3.35849  | 0.001114 | 0.042366 | 1 |
| ENSG0000 | remission | Inflamed | RP11-467J | antisense  | chr16 | 53069602 | 53086785 | - | 464   | 10.75418 | 0.124105 | 0.919499 | 0.273833 | 3.357878 | 0.001116 | 0.042389 | 1 |
| ENSG0000 | remission | Inflamed | RP11-395L | pseudoger  | chr2  | 1.14E+08 | 1.14E+08 | + | 496   | 3.322196 | 0.312649 | 0.72947  | 0.217274 | 3.357377 | 0.001118 | 0.042397 | 1 |
| ENSG0000 | remission | Inflamed | PSMB2     | protein_cc | chr1  | 36067185 | 36107445 | - | 2701  | 3778.933 | 0        | -0.34422 | 0.102545 | -3.35677 | 0.00112  | 0.042419 | 1 |
| ENSG0000 | remission | Inflamed | RP11-514F | sense_intr | chr11 | 36408071 | 36409800 | + | 151   | 3.28401  | 0.396181 | 0.768546 | 0.229024 | 3.355745 | 0.001124 | 0.042499 | 1 |
| ENSG0000 | remission | Inflamed | FTSJ1     | protein_cc | chrX  | 48334541 | 48344752 | + | 2740  | 1114.723 | 0        | -0.35123 | 0.10468  | -3.35524 | 0.001125 | 0.042508 | 1 |
| ENSG0000 | remission | Inflamed | RP11-305L | lincRNA    | chr9  | 93968457 | 93972581 | - | 4125  | 8.828162 | 0.133652 | 0.868653 | 0.258971 | 3.354249 | 0.001129 | 0.042583 | 1 |
| ENSG0000 | remission | Inflamed | RP11-145A | antisense  | chr1  | 2.26E+08 | 2.26E+08 | + | 1530  | 2.484487 | 0.584726 | -0.89822 | 0.267848 | -3.35348 | 0.001132 | 0.042629 | 1 |
| ENSG0000 | remission | Inflamed | RAB33A    | protein_cc | chrX  | 1.29E+08 | 1.29E+08 | + | 1258  | 31.72315 | 0        | -0.83063 | 0.24787  | -3.35108 | 0.001141 | 0.042781 | 1 |
| ENSG0000 | remission | Inflamed | FIBIN     | protein_cc | chr11 | 27015628 | 27018630 | + | 3003  | 330.2697 | 0        | -1.34215 | 0.400525 | -3.35098 | 0.001141 | 0.042781 | 1 |
| ENSG0000 | remission | Inflamed | HLA-E     | protein_cc | chr6  | 30457244 | 30461982 | + | 2975  | 42464.64 | 0        | -0.33919 | 0.101231 | -3.35066 | 0.001142 | 0.042781 | 1 |
| ENSG0000 | remission | Inflamed | RP11-120K | lincRNA    | chr13 | 1.14E+08 | 1.14E+08 | - | 1297  | 32.32458 | 0.02864  | 1.043718 | 0.311501 | 3.350611 | 0.001142 | 0.042781 | 1 |
| ENSG0000 | remission | Inflamed | GJA5      | protein_cc | chr1  | 1.47E+08 | 1.47E+08 | - | 3256  | 258.8711 | 0.009547 | -1.31377 | 0.392232 | -3.34946 | 0.001147 | 0.042811 | 1 |
| ENSG0000 | remission | Inflamed | DHRS11    | protein_cc | chr17 | 34948228 | 34957235 | + | 5462  | 4695.227 | 0        | 1.121446 | 0.334868 | 3.348916 | 0.001149 | 0.042811 | 1 |
| ENSG0000 | remission | Inflamed | DDX39A    | protein_cc | chr19 | 14519631 | 14530192 | - | 3837  | 2061.847 | 0        | -0.33349 | 0.099605 | -3.34811 | 0.001152 | 0.042811 | 1 |
| ENSG0000 | remission | Inflamed | MPV17L2   | protein_cc | chr19 | 18303992 | 18307758 | + | 2135  | 455.9666 | 0        | -0.40065 | 0.119685 | -3.34756 | 0.001154 | 0.042811 | 1 |
| ENSG0000 | remission | Inflamed | CASC10    | protein_cc | chr10 | 21781587 | 21786191 | - | 3801  | 33.46778 | 0.01432  | -0.98836 | 0.29525  | -3.34753 | 0.001154 | 0.042811 | 1 |
| ENSG0000 | remission | Inflamed | RP11-807I | pseudoger  | chr11 | 71869866 | 71870905 | + | 741   | 20.75418 | 0.396181 | 1.128147 | 0.337068 | 3.34694  | 0.001156 | 0.042811 | 1 |
| ENSG0000 | remission | Inflamed | AC098823  | lincRNA    | chr2  | 2.32E+08 | 2.32E+08 | - | 2609  | 3.26253  | 0.319809 | 0.700595 | 0.209325 | 3.346921 | 0.001156 | 0.042811 | 1 |
| ENSG0000 | remission | Inflamed | CLEC4A    | protein_cc | chr12 | 8276228  | 8291203  | + | 1281  | 166.3365 | 0        | -0.97481 | 0.291258 | -3.3469  | 0.001156 | 0.042811 | 1 |
| ENSG0000 | remission | Inflamed | RP5-1061I | lincRNA    | chr1  | 2.29E+08 | 2.29E+08 | - | 1155  | 14.47494 | 0.042959 | 0.803628 | 0.240187 | 3.345847 | 0.00116  | 0.042881 | 1 |
| ENSG0000 | remission | Inflamed | SCAMP3    | protein_cc | chr1  | 1.55E+08 | 1.55E+08 | - | 2442  | 2112.224 | 0        | -0.28695 | 0.085772 | -3.34553 | 0.001161 | 0.042881 | 1 |
| ENSG0000 | remission | Inflamed | KIR2DL3   | protein_cc | chr19 | 55249980 | 55295776 | + | 2484  | 2.424821 | 0.51074  | -0.6878  | 0.205806 | -3.34196 | 0.001175 | 0.043317 | 1 |
| ENSG0000 | remission | Inflamed | TNFRSF4   | protein_cc | chr1  | 1146706  | 1149518  | - | 1721  | 339.5036 | 0        | -1.08404 | 0.324495 | -3.34071 | 0.00118  | 0.043432 | 1 |
| ENSG0000 | remission | Inflamed | LINC0023E | processed  | chr14 | 66953072 | 66965271 | + | 1417  | 7.739857 | 0.260143 | 0.966332 | 0.289459 | 3.338406 | 0.001188 | 0.043696 | 1 |
| ENSG0000 | remission | Inflamed | TAPT1-AS1 | antisense  | chr4  | 16228286 | 16321763 | + | 4192  | 143.5847 | 0        | 0.595234 | 0.178334 | 3.337756 | 0.001191 | 0.043726 | 1 |
| ENSG0000 | remission | Inflamed | RP11-395C | pseudoger  | chr5  | 1.26E+08 | 1.26E+08 | - | 303   | 7.701671 | 0.23389  | 0.932352 | 0.279531 | 3.335409 | 0.0012   | 0.043962 | 1 |
| ENSG0000 | remission | Inflamed | RP11-513M | antisense  | chr9  | 19375449 | 19375994 | + | 546   | 21.08115 | 0.019093 | 0.796093 | 0.238692 | 3.335226 | 0.001201 | 0.043962 | 1 |
| ENSG0000 | remission | Inflamed | SEMA5A    | protein_cc | chr5  | 9035138  | 9546187  | - | 12097 | 2079.568 | 0        | 0.852087 | 0.255519 | 3.334734 | 0.001203 | 0.043971 | 1 |

|          |           |          |           |            |       |          |          |   |       |          |          |          |          |          |          |          |   |
|----------|-----------|----------|-----------|------------|-------|----------|----------|---|-------|----------|----------|----------|----------|----------|----------|----------|---|
| ENSG0000 | remission | Inflamed | FGF9      | protein_cc | chr13 | 22245522 | 22278637 | + | 4539  | 62.41766 | 0.019093 | 1.297651 | 0.389345 | 3.332909 | 0.00121  | 0.044075 | 1 |
| ENSG0000 | remission | Inflamed | PF4V1     | protein_cc | chr4  | 74718906 | 74719872 | + | 522   | 13.55609 | 0.252983 | -1.30689 | 0.392152 | -3.33262 | 0.001211 | 0.044075 | 1 |
| ENSG0000 | remission | Inflamed | ADAMTS4   | protein_cc | chr1  | 1.61E+08 | 1.61E+08 | - | 10334 | 734.3628 | 0.00716  | -1.64526 | 0.493701 | -3.3325  | 0.001211 | 0.044075 | 1 |
| ENSG0000 | remission | Inflamed | KLK10     | protein_cc | chr19 | 51515995 | 51523431 | - | 3853  | 1661.446 | 0        | -2.75994 | 0.828242 | -3.33228 | 0.001212 | 0.044075 | 1 |
| ENSG0000 | remission | Inflamed | CTD-2201  | antisense  | chr5  | 79348197 | 79379477 | - | 3233  | 18.99045 | 0.066826 | 0.969236 | 0.290911 | 3.331732 | 0.001214 | 0.044093 | 1 |
| ENSG0000 | remission | Inflamed | LINC0039C | lincRNA    | chr13 | 44680514 | 44711372 | - | 340   | 2.610979 | 0.441527 | 0.70475  | 0.211585 | 3.330807 | 0.001218 | 0.044143 | 1 |
| ENSG0000 | remission | Inflamed | RP11-47G  | pseudoger  | chr10 | 1.26E+08 | 1.26E+08 | - | 525   | 7.331742 | 0.210024 | -1.01764 | 0.30555  | -3.33053 | 0.001219 | 0.044143 | 1 |
| ENSG0000 | remission | Inflamed | RP11-275I | lincRNA    | chr15 | 38964048 | 38981392 | + | 815   | 7.575179 | 0.300716 | -1.2104  | 0.363489 | -3.32995 | 0.001221 | 0.044164 | 1 |
| ENSG0000 | remission | Inflamed | RP11-416I | antisense  | chr10 | 1.05E+08 | 1.05E+08 | + | 1432  | 17.70883 | 0.050119 | 1.057813 | 0.31773  | 3.329278 | 0.001224 | 0.044199 | 1 |
| ENSG0000 | remission | Inflamed | MIF       | protein_cc | chr22 | 24236191 | 24237414 | + | 1109  | 2893.979 | 0        | -0.60082 | 0.180498 | -3.32868 | 0.001226 | 0.044224 | 1 |
| ENSG0000 | remission | Inflamed | IL5RA     | protein_cc | chr3  | 3111233  | 3168297  | - | 3377  | 40.06205 | 0        | -1.20033 | 0.360705 | -3.32775 | 0.00123  | 0.044261 | 1 |
| ENSG0000 | remission | Inflamed | SYT3      | protein_cc | chr19 | 51124564 | 51171651 | - | 3832  | 7.51074  | 0.193317 | -0.94204 | 0.283103 | -3.32757 | 0.001231 | 0.044261 | 1 |
| ENSG0000 | remission | Inflamed | GPX1      | protein_cc | chr3  | 49394609 | 49396033 | - | 1425  | 4064.988 | 0        | -0.61269 | 0.184156 | -3.32703 | 0.001233 | 0.044277 | 1 |
| ENSG0000 | remission | Inflamed | KRT23     | protein_cc | chr17 | 39078948 | 39093886 | - | 2902  | 44.39379 | 0.023866 | -1.66135 | 0.499515 | -3.32592 | 0.001237 | 0.044347 | 1 |
| ENSG0000 | remission | Inflamed | VWA1      | protein_cc | chr1  | 1370241  | 1378262  | + | 5065  | 4033.9   | 0        | -0.77102 | 0.231836 | -3.3257  | 0.001238 | 0.044347 | 1 |
| ENSG0000 | remission | Inflamed | RP11-502I | lincRNA    | chr15 | 67833410 | 67834942 | - | 1533  | 56.8401  | 0        | 0.717159 | 0.215872 | 3.322151 | 0.001252 | 0.044745 | 1 |
| ENSG0000 | remission | Inflamed | MAMDC2    | protein_cc | chr9  | 72658497 | 72841886 | + | 3854  | 289.8878 | 0.009547 | 1.519435 | 0.457375 | 3.32208  | 0.001253 | 0.044745 | 1 |
| ENSG0000 | remission | Inflamed | RP11-466A | sense_intr | chr17 | 30839887 | 30846368 | - | 420   | 3.093079 | 0.293556 | 0.687508 | 0.207026 | 3.32088  | 0.001257 | 0.044857 | 1 |
| ENSG0000 | remission | Inflamed | AIFM3     | protein_cc | chr22 | 21319396 | 21335649 | + | 5332  | 1813.604 | 0        | 1.288872 | 0.388208 | 3.320054 | 0.001261 | 0.044915 | 1 |
| ENSG0000 | remission | Inflamed | PRC1-AS1  | antisense  | chr15 | 91509575 | 91531854 | + | 1799  | 13.88305 | 0.078759 | 0.904275 | 0.272412 | 3.319511 | 0.001263 | 0.044933 | 1 |
| ENSG0000 | remission | Inflamed | EMR2      | protein_cc | chr19 | 14843205 | 14889353 | - | 8622  | 1545.389 | 0        | -1.1376  | 0.342979 | -3.31682 | 0.001274 | 0.045209 | 1 |
| ENSG0000 | remission | Inflamed | WNT7A     | protein_cc | chr3  | 13857755 | 13921618 | - | 4579  | 5.470167 | 0.501193 | -1.34771 | 0.406334 | -3.31676 | 0.001274 | 0.045209 | 1 |
| ENSG0000 | remission | Inflamed | IGLVI-70  | IG_V_pseu  | chr22 | 22380474 | 22380991 | + | 390   | 215.6516 | 0.02148  | -1.57509 | 0.474945 | -3.31635 | 0.001276 | 0.045209 | 1 |
| ENSG0000 | remission | Inflamed | CTA-384D  | lincRNA    | chr22 | 50981079 | 50981440 | + | 362   | 22.46778 | 0.050119 | -1.19928 | 0.361728 | -3.31542 | 0.00128  | 0.045284 | 1 |
| ENSG0000 | remission | Inflamed | RP11-420A | antisense  | chr17 | 5267610  | 5274921  | - | 512   | 2.393795 | 0.451074 | 0.691718 | 0.208689 | 3.314586 | 0.001283 | 0.045309 | 1 |
| ENSG0000 | remission | Inflamed | ABCB1     | protein_cc | chr7  | 87133175 | 87342611 | - | 5552  | 1687.248 | 0        | 1.408936 | 0.425112 | 3.314273 | 0.001285 | 0.045309 | 1 |
| ENSG0000 | remission | Inflamed | MYO1F     | protein_cc | chr19 | 8585674  | 8642461  | - | 8550  | 2720.11  | 0        | -0.92185 | 0.278169 | -3.31399 | 0.001286 | 0.045309 | 1 |
| ENSG0000 | remission | Inflamed | TRHDE     | protein_cc | chr12 | 72481046 | 73059422 | + | 6835  | 118.0095 | 0.016706 | 1.384612 | 0.417872 | 3.313485 | 0.001288 | 0.045322 | 1 |
| ENSG0000 | remission | Inflamed | R3HDM4    | protein_cc | chr19 | 896503   | 913240   | - | 2961  | 3778.84  | 0        | -0.44371 | 0.133954 | -3.3124  | 0.001292 | 0.045346 | 1 |
| ENSG0000 | remission | Inflamed | PTPRD     | protein_cc | chr9  | 8314246  | 10612723 | - | 11081 | 1114.835 | 0        | 1.084791 | 0.327496 | 3.312382 | 0.001292 | 0.045346 | 1 |
| ENSG0000 | remission | Inflamed | IRG1      | protein_cc | chr13 | 77522632 | 77532777 | + | 2177  | 59.27446 | 0.386635 | -2.09448 | 0.632379 | -3.31207 | 0.001294 | 0.045346 | 1 |
| ENSG0000 | remission | Inflamed | CDKN2B    | protein_cc | chr9  | 22002902 | 22009362 | - | 4058  | 2655.298 | 0        | 1.22646  | 0.370415 | 3.311039 | 0.001298 | 0.045437 | 1 |
| ENSG0000 | remission | Inflamed | KIFC3     | protein_cc | chr16 | 57792129 | 57896957 | - | 7552  | 987.568  | 0        | -0.9157  | 0.276765 | -3.30858 | 0.001308 | 0.045596 | 1 |
| ENSG0000 | remission | Inflamed | RP11-465E | lincRNA    | chr1  | 1072397  | 1079436  | + | 1620  | 41.49642 | 0.045346 | 1.11924  | 0.338297 | 3.308452 | 0.001309 | 0.045596 | 1 |
| ENSG0000 | remission | Inflamed | AP001429  | sense_intr | chr21 | 38473114 | 38473643 | + | 530   | 1.465394 | 0.646778 | 0.566891 | 0.171365 | 3.308088 | 0.00131  | 0.045596 | 1 |
| ENSG0000 | remission | Inflamed | RP11-598F | antisense  | chr12 | 273830   | 275487   | - | 1101  | 17.56325 | 0.200477 | -1.33706 | 0.404335 | -3.3068  | 0.001316 | 0.045596 | 1 |
| ENSG0000 | remission | Inflamed | IGLV7-46  | IG_V_gene  | chr22 | 22723982 | 22724454 | + | 384   | 4029.036 | 0        | -1.62067 | 0.490119 | -3.30668 | 0.001316 | 0.045596 | 1 |
| ENSG0000 | remission | Inflamed | KIAA1456  | protein_cc | chr8  | 12803151 | 12889012 | + | 14668 | 258.2554 | 0        | 1.094337 | 0.330949 | 3.306663 | 0.001316 | 0.045596 | 1 |
| ENSG0000 | remission | Inflamed | SPP1      | protein_cc | chr4  | 88896819 | 88904562 | + | 2288  | 551.2959 | 0.004773 | -1.62205 | 0.490579 | -3.30641 | 0.001317 | 0.045596 | 1 |
| ENSG0000 | remission | Inflamed | MMP1      | protein_cc | chr11 | 1.03E+08 | 1.03E+08 | - | 1970  | 4548.446 | 0        | -2.1665  | 0.655263 | -3.30631 | 0.001318 | 0.045596 | 1 |

|          |           |          |           |            |       |          |          |   |       |          |          |          |          |          |          |          |   |
|----------|-----------|----------|-----------|------------|-------|----------|----------|---|-------|----------|----------|----------|----------|----------|----------|----------|---|
| ENSG0000 | remission | Inflamed | IGKC      | IG_C_gene  | chr2  | 89156674 | 89157196 | - | 523   | 644.8998 | 0        | -1.62204 | 0.490638 | -3.30599 | 0.001319 | 0.045596 | 1 |
| ENSG0000 | remission | Inflamed | TNFRSF18  | protein_cc | chr1  | 1138888  | 1142071  | - | 1370  | 294.1313 | 0        | -0.91289 | 0.276145 | -3.30583 | 0.00132  | 0.045596 | 1 |
| ENSG0000 | remission | Inflamed | COX19     | protein_cc | chr7  | 938415   | 1015235  | - | 5542  | 688.9952 | 0        | 0.378985 | 0.114681 | 3.304701 | 0.001325 | 0.045655 | 1 |
| ENSG0000 | remission | Inflamed | MYO1D     | protein_cc | chr17 | 30819540 | 31204195 | - | 7731  | 25977.47 | 0        | 0.764553 | 0.231362 | 3.30458  | 0.001325 | 0.045655 | 1 |
| ENSG0000 | remission | Inflamed | CTD-2033I | antisense  | chr15 | 39885781 | 39886432 | - | 281   | 7.589499 | 0.315036 | 1.214778 | 0.367659 | 3.304088 | 0.001327 | 0.045655 | 1 |
| ENSG0000 | remission | Inflamed | MIR31HG   | sense_ove  | chr9  | 21455641 | 21559668 | - | 745   | 7.799523 | 0.441527 | -1.29943 | 0.393313 | -3.3038  | 0.001328 | 0.045655 | 1 |
| ENSG0000 | remission | Inflamed | PPFIBP2   | protein_cc | chr11 | 7534529  | 7678358  | + | 9617  | 1794.48  | 0        | 0.524322 | 0.158786 | 3.302062 | 0.001336 | 0.045826 | 1 |
| ENSG0000 | remission | Inflamed | FGFR3     | protein_cc | chr4  | 1795034  | 1810599  | + | 4834  | 1824.064 | 0        | 0.997911 | 0.302231 | 3.301816 | 0.001337 | 0.045826 | 1 |
| ENSG0000 | remission | Inflamed | CAMK2N1   | protein_cc | chr1  | 20808884 | 20812713 | - | 2615  | 5970.329 | 0        | 0.797008 | 0.241517 | 3.300013 | 0.001345 | 0.046003 | 1 |
| ENSG0000 | remission | Inflamed | ASIC2     | protein_cc | chr17 | 31340105 | 32501983 | - | 5597  | 21.7685  | 0.054893 | 1.078041 | 0.326699 | 3.299804 | 0.001346 | 0.046003 | 1 |
| ENSG0000 | remission | Inflamed | CACNB2    | protein_cc | chr10 | 18429606 | 18830798 | + | 6537  | 256.4415 | 0.002387 | 1.071646 | 0.324896 | 3.298426 | 0.001352 | 0.046146 | 1 |
| ENSG0000 | remission | Inflamed | TMIGD1    | protein_cc | chr17 | 28643351 | 28661077 | - | 1228  | 954.4368 | 0.023866 | 2.490683 | 0.755271 | 3.297733 | 0.001355 | 0.046189 | 1 |
| ENSG0000 | remission | Inflamed | FOXC1     | protein_cc | chr6  | 1610681  | 1614127  | + | 3447  | 80.36993 | 0.01432  | -0.88864 | 0.269523 | -3.2971  | 0.001357 | 0.046216 | 1 |
| ENSG0000 | remission | Inflamed | BHLHA15   | protein_cc | chr7  | 97840739 | 97842291 | + | 798   | 422.6301 | 0        | -1.18411 | 0.359174 | -3.29674 | 0.001359 | 0.046216 | 1 |
| ENSG0000 | remission | Inflamed | SPAG4     | protein_cc | chr20 | 34203814 | 34208971 | + | 2240  | 327.0979 | 0        | -1.16164 | 0.352436 | -3.29604 | 0.001362 | 0.04626  | 1 |
| ENSG0000 | remission | Inflamed | AC121251  | pseudoger  | chr3  | 23431152 | 23431400 | - | 249   | 4.73747  | 0.310263 | -0.91924 | 0.278928 | -3.29562 | 0.001364 | 0.046262 | 1 |
| ENSG0000 | remission | Inflamed | SAMD13    | protein_cc | chr1  | 84764049 | 84855640 | + | 3589  | 173.5752 | 0.002387 | 1.019132 | 0.309408 | 3.293813 | 0.001372 | 0.046445 | 1 |
| ENSG0000 | remission | Inflamed | LPCAT1    | protein_cc | chr5  | 1456595  | 1524092  | - | 6494  | 4154.68  | 0        | -0.7521  | 0.228397 | -3.29296 | 0.001375 | 0.046445 | 1 |
| ENSG0000 | remission | Inflamed | CLEC5A    | protein_cc | chr7  | 1.42E+08 | 1.42E+08 | - | 4129  | 82.06921 | 0.045346 | -1.87072 | 0.568125 | -3.2928  | 0.001376 | 0.046445 | 1 |
| ENSG0000 | remission | Inflamed | OVOL3     | protein_cc | chr19 | 36602104 | 36604613 | + | 879   | 3.673031 | 0.563246 | -1.0079  | 0.306092 | -3.29278 | 0.001376 | 0.046445 | 1 |
| ENSG0000 | remission | Inflamed | MAFF      | protein_cc | chr22 | 38597889 | 38612518 | + | 2977  | 1339.905 | 0        | -0.84196 | 0.255813 | -3.29133 | 0.001383 | 0.046602 | 1 |
| ENSG0000 | remission | Inflamed | CAMK1D    | protein_cc | chr10 | 12391481 | 12877545 | + | 8746  | 2599.831 | 0        | 0.695957 | 0.211518 | 3.290295 | 0.001387 | 0.046697 | 1 |
| ENSG0000 | remission | Inflamed | LY6E      | protein_cc | chr8  | 1.44E+08 | 1.44E+08 | + | 2640  | 1887.2   | 0        | -0.87595 | 0.266296 | -3.28938 | 0.001391 | 0.046716 | 1 |
| ENSG0000 | remission | Inflamed | ECHDC2    | protein_cc | chr1  | 53361656 | 53392884 | - | 11498 | 2735.37  | 0        | 0.737612 | 0.224257 | 3.289141 | 0.001392 | 0.046716 | 1 |
| ENSG0000 | remission | Inflamed | FMO5      | protein_cc | chr1  | 1.47E+08 | 1.47E+08 | - | 5988  | 1087.513 | 0        | 1.153193 | 0.350706 | 3.288207 | 0.001397 | 0.046716 | 1 |
| ENSG0000 | remission | Inflamed | MAOA      | protein_cc | chrX  | 43515467 | 43606068 | + | 4213  | 7999.68  | 0        | 1.1181   | 0.340072 | 3.287837 | 0.001398 | 0.046716 | 1 |
| ENSG0000 | remission | Inflamed | TMEM132   | protein_cc | chr11 | 60691935 | 60704631 | + | 7271  | 1303.153 | 0        | -1.21305 | 0.368956 | -3.2878  | 0.001398 | 0.046716 | 1 |
| ENSG0000 | remission | Inflamed | AQP5      | protein_cc | chr12 | 50355653 | 50359464 | + | 1885  | 90.66826 | 0.252983 | -2.26644 | 0.689384 | -3.28764 | 0.001399 | 0.046716 | 1 |
| ENSG0000 | remission | Inflamed | CXCL5     | protein_cc | chr4  | 74861359 | 74864496 | - | 2538  | 1725.842 | 0.081146 | -3.6525  | 1.111067 | -3.28738 | 0.0014   | 0.046716 | 1 |
| ENSG0000 | remission | Inflamed | SSSCA1    | protein_cc | chr11 | 65337901 | 65341413 | + | 2008  | 440.2267 | 0        | -0.48116 | 0.146418 | -3.28619 | 0.001406 | 0.046764 | 1 |
| ENSG0000 | remission | Inflamed | MT1G      | protein_cc | chr16 | 56700643 | 56701977 | - | 750   | 2189.334 | 0        | 1.431443 | 0.435649 | 3.285774 | 0.001407 | 0.046764 | 1 |
| ENSG0000 | remission | Inflamed | ILDR1     | protein_cc | chr3  | 1.22E+08 | 1.22E+08 | - | 2953  | 758.9021 | 0        | 0.890604 | 0.271083 | 3.285349 | 0.001409 | 0.046764 | 1 |
| ENSG0000 | remission | Inflamed | PLEKHN1   | protein_cc | chr1  | 901877   | 911245   | + | 2833  | 139.3986 | 0.00716  | -1.08011 | 0.328787 | -3.28512 | 0.00141  | 0.046764 | 1 |
| ENSG0000 | remission | Inflamed | CYP3A7    | protein_cc | chr7  | 99302660 | 99332819 | - | 3531  | 10.67542 | 0.133652 | 0.962577 | 0.293015 | 3.285076 | 0.001411 | 0.046764 | 1 |
| ENSG0000 | remission | Inflamed | ATP13A5   | protein_cc | chr3  | 1.93E+08 | 1.93E+08 | - | 6228  | 0.959427 | 0.768496 | 0.495669 | 0.151023 | 3.282076 | 0.001424 | 0.047103 | 1 |
| ENSG0000 | remission | Inflamed | VOPP1     | protein_cc | chr7  | 55503749 | 55640681 | - | 5361  | 3265.1   | 0        | -0.3116  | 0.094941 | -3.28203 | 0.001424 | 0.047103 | 1 |
| ENSG0000 | remission | Inflamed | RP11-772E | pseudoger  | chr5  | 1.26E+08 | 1.26E+08 | - | 232   | 11.62768 | 0.155131 | 0.922287 | 0.281108 | 3.280903 | 0.00143  | 0.047214 | 1 |
| ENSG0000 | remission | Inflamed | RGS19     | protein_cc | chr20 | 62704534 | 62711323 | - | 2010  | 818.6826 | 0        | -0.86331 | 0.263252 | -3.27941 | 0.001436 | 0.047379 | 1 |
| ENSG0000 | remission | Inflamed | STRA6     | protein_cc | chr15 | 74471807 | 74504608 | - | 7690  | 180.4368 | 0.045346 | -1.76135 | 0.53739  | -3.27761 | 0.001445 | 0.047594 | 1 |
| ENSG0000 | remission | Inflamed | CD82      | protein_cc | chr11 | 44585977 | 44641913 | + | 4054  | 3403.126 | 0        | -0.74247 | 0.226576 | -3.27691 | 0.001448 | 0.04764  | 1 |



|          |           |          |           |            |       |          |          |   |       |          |          |          |          |          |          |          |   |
|----------|-----------|----------|-----------|------------|-------|----------|----------|---|-------|----------|----------|----------|----------|----------|----------|----------|---|
| ENSG0000 | remission | Inflamed | RP11-91J1 | lincRNA    | chr8  | 424455   | 427966   | + | 3512  | 184.0621 | 0.004773 | 0.950072 | 0.289979 | 3.276341 | 0.00145  | 0.047667 | 1 |
| ENSG0000 | remission | Inflamed | MFNG      | protein_cc | chr22 | 37865101 | 37882439 | - | 3042  | 1092.742 | 0        | -0.57767 | 0.176451 | -3.27385 | 0.001462 | 0.047987 | 1 |
| ENSG0000 | remission | Inflamed | PDCD4     | protein_cc | chr10 | 1.13E+08 | 1.13E+08 | + | 4535  | 7016.914 | 0        | 0.914656 | 0.279468 | 3.272848 | 0.001467 | 0.048081 | 1 |
| ENSG0000 | remission | Inflamed | APOC2     | protein_cc | chr19 | 45449243 | 45452822 | + | 1312  | 20.6611  | 0.040573 | -0.89143 | 0.27246  | -3.27179 | 0.001472 | 0.048096 | 1 |
| ENSG0000 | remission | Inflamed | VNN2      | protein_cc | chr6  | 1.33E+08 | 1.33E+08 | - | 2633  | 414.8616 | 0        | -1.55176 | 0.474334 | -3.27145 | 0.001473 | 0.048096 | 1 |
| ENSG0000 | remission | Inflamed | HSPA6     | protein_cc | chr1  | 1.61E+08 | 1.61E+08 | + | 2646  | 306.5847 | 0        | -1.20866 | 0.369498 | -3.27109 | 0.001475 | 0.048096 | 1 |
| ENSG0000 | remission | Inflamed | FTL       | protein_cc | chr19 | 49468558 | 49470135 | + | 878   | 70707.24 | 0        | -0.65399 | 0.199935 | -3.27102 | 0.001475 | 0.048096 | 1 |
| ENSG0000 | remission | Inflamed | TRIM55    | protein_cc | chr8  | 67039131 | 67087720 | + | 3079  | 9.477327 | 0.133652 | -1.13472 | 0.346926 | -3.2708  | 0.001476 | 0.048096 | 1 |
| ENSG0000 | remission | Inflamed | RP11-5571 | lincRNA    | chr6  | 1.35E+08 | 1.35E+08 | - | 1731  | 1.747017 | 0.570406 | -0.58313 | 0.178315 | -3.2702  | 0.001479 | 0.048127 | 1 |
| ENSG0000 | remission | Inflamed | AC129492  | protein_cc | chr17 | 7982800  | 7984883  | + | 1804  | 24.34368 | 0.042959 | 1.140617 | 0.348831 | 3.269823 | 0.001481 | 0.048127 | 1 |
| ENSG0000 | remission | Inflamed | IGKV1-13  | IG_V_pseu  | chr2  | 89345492 | 89345963 | - | 347   | 34.05251 | 0.145585 | -1.45608 | 0.445448 | -3.2688  | 0.001486 | 0.048224 | 1 |
| ENSG0000 | remission | Inflamed | KCNMB2    | protein_cc | chr3  | 1.78E+08 | 1.79E+08 | + | 3585  | 7.684964 | 0.150358 | 0.951953 | 0.291297 | 3.267986 | 0.00149  | 0.04829  | 1 |
| ENSG0000 | remission | Inflamed | PTGS2     | protein_cc | chr1  | 1.87E+08 | 1.87E+08 | - | 5269  | 1251.661 | 0.002387 | -1.82604 | 0.559019 | -3.2665  | 0.001497 | 0.048346 | 1 |
| ENSG0000 | remission | Inflamed | FETUB     | protein_cc | chr3  | 1.86E+08 | 1.86E+08 | + | 2024  | 3.336516 | 0.665871 | 1.063152 | 0.325474 | 3.266475 | 0.001497 | 0.048346 | 1 |
| ENSG0000 | remission | Inflamed | NUDT1     | protein_cc | chr7  | 2281857  | 2290781  | + | 2006  | 282.6706 | 0        | -0.52225 | 0.159885 | -3.26643 | 0.001497 | 0.048346 | 1 |
| ENSG0000 | remission | Inflamed | SERINC5   | protein_cc | chr5  | 79407050 | 79551898 | - | 5107  | 1225.523 | 0        | 0.731234 | 0.223907 | 3.265794 | 0.0015   | 0.048346 | 1 |
| ENSG0000 | remission | Inflamed | PSMB8     | protein_cc | chr6  | 32808494 | 32812480 | - | 2006  | 4561.017 | 0        | -0.38876 | 0.119043 | -3.26569 | 0.001501 | 0.048346 | 1 |
| ENSG0000 | remission | Inflamed | APBA1     | protein_cc | chr9  | 72042446 | 72287222 | - | 6534  | 491.3699 | 0.002387 | 0.786703 | 0.24097  | 3.264735 | 0.001505 | 0.048434 | 1 |
| ENSG0000 | remission | Inflamed | RP11-164F | antisense  | chr4  | 1.53E+08 | 1.53E+08 | + | 304   | 26.52029 | 0.02864  | 0.911064 | 0.27913  | 3.263937 | 0.001509 | 0.048498 | 1 |
| ENSG0000 | remission | Inflamed | ADM       | protein_cc | chr11 | 10326227 | 10328944 | + | 2718  | 2536.186 | 0        | -0.8938  | 0.273904 | -3.2632  | 0.001513 | 0.048535 | 1 |
| ENSG0000 | remission | Inflamed | ADAMTS1   | protein_cc | chr15 | 1.01E+08 | 1.01E+08 | - | 7800  | 157.6778 | 0.002387 | 0.653446 | 0.200264 | 3.262927 | 0.001514 | 0.048535 | 1 |
| ENSG0000 | remission | Inflamed | RP4-584D  | antisense  | chr7  | 1.5E+08  | 1.5E+08  | - | 577   | 13.50119 | 0.062053 | 0.785569 | 0.24083  | 3.26192  | 0.001519 | 0.048632 | 1 |
| ENSG0000 | remission | Inflamed | ZNF385C   | protein_cc | chr17 | 40177594 | 40217383 | - | 5115  | 27.1957  | 0.011933 | 0.804751 | 0.24677  | 3.261137 | 0.001522 | 0.048645 | 1 |
| ENSG0000 | remission | Inflamed | MCF2L-AS  | antisense  | chr13 | 1.14E+08 | 1.14E+08 | - | 712   | 58.92363 | 0.002387 | 0.792105 | 0.242917 | 3.260806 | 0.001524 | 0.048645 | 1 |
| ENSG0000 | remission | Inflamed | KLK6      | protein_cc | chr19 | 51461887 | 51472929 | - | 1976  | 292.3007 | 0.331742 | -2.94813 | 0.904216 | -3.26043 | 0.001526 | 0.048645 | 1 |
| ENSG0000 | remission | Inflamed | RP11-542E | lincRNA    | chr12 | 67913609 | 67960906 | + | 2284  | 7.575179 | 0.28401  | 0.976103 | 0.299423 | 3.259942 | 0.001528 | 0.048645 | 1 |
| ENSG0000 | remission | Inflamed | DBNDD2    | protein_cc | chr20 | 44034697 | 44039250 | + | 2764  | 336.1575 | 0        | 0.572103 | 0.175518 | 3.259507 | 0.00153  | 0.048645 | 1 |
| ENSG0000 | remission | Inflamed | CEACAM1   | protein_cc | chr19 | 45165545 | 45187631 | + | 5202  | 281.3055 | 0.004773 | 0.972357 | 0.298325 | 3.259393 | 0.001531 | 0.048645 | 1 |
| ENSG0000 | remission | Inflamed | LBP       | protein_cc | chr20 | 36974759 | 37005665 | + | 1961  | 41.28401 | 0.231504 | -2.08098 | 0.638557 | -3.25888 | 0.001533 | 0.048645 | 1 |
| ENSG0000 | remission | Inflamed | SOX6      | protein_cc | chr11 | 15987995 | 16761138 | - | 19632 | 233.4678 | 0.002387 | 1.033789 | 0.31724  | 3.258694 | 0.001534 | 0.048645 | 1 |
| ENSG0000 | remission | Inflamed | ADH1C     | polymorpt  | chr4  | 1E+08    | 1E+08    | - | 1860  | 4661.227 | 0.002387 | 1.89101  | 0.580348 | 3.258408 | 0.001536 | 0.048645 | 1 |
| ENSG0000 | remission | Inflamed | CTB-36O1  | pseudoger  | chr5  | 1.34E+08 | 1.34E+08 | - | 747   | 258.3294 | 0        | 0.722572 | 0.221909 | 3.256159 | 0.001547 | 0.048837 | 1 |
| ENSG0000 | remission | Inflamed | KTI12     | protein_cc | chr1  | 52497775 | 52499488 | - | 1714  | 313.4582 | 0        | -0.28551 | 0.087686 | -3.25611 | 0.001547 | 0.048837 | 1 |
| ENSG0000 | remission | Inflamed | ADRM1     | protein_cc | chr20 | 60877149 | 60883918 | + | 2142  | 3305.9   | 0        | -0.33717 | 0.103552 | -3.25603 | 0.001547 | 0.048837 | 1 |
| ENSG0000 | remission | Inflamed | TNFRSF12  | protein_cc | chr16 | 3068446  | 3072384  | + | 1848  | 781.0406 | 0        | -1.05179 | 0.323158 | -3.25473 | 0.001554 | 0.048923 | 1 |
| ENSG0000 | remission | Inflamed | RP11-356C | lincRNA    | chr14 | 38025363 | 38036300 | - | 532   | 40.26014 | 0.052506 | 1.142424 | 0.351005 | 3.254724 | 0.001554 | 0.048923 | 1 |
| ENSG0000 | remission | Inflamed | DEF8      | protein_cc | chr16 | 90014333 | 90034468 | + | 6565  | 2065.862 | 0        | -0.47631 | 0.14644  | -3.25261 | 0.001564 | 0.049064 | 1 |
| ENSG0000 | remission | Inflamed | CNN2      | protein_cc | chr19 | 1026298  | 1039068  | + | 3928  | 6980.864 | 0        | -0.5309  | 0.16324  | -3.25224 | 0.001566 | 0.049064 | 1 |
| ENSG0000 | remission | Inflamed | HAVCR2    | protein_cc | chr5  | 1.57E+08 | 1.57E+08 | - | 3804  | 394.3413 | 0        | -0.74505 | 0.2291   | -3.25207 | 0.001567 | 0.049064 | 1 |
| ENSG0000 | remission | Inflamed | KRT7      | protein_cc | chr12 | 52626304 | 52645970 | + | 4093  | 423.9618 | 0.002387 | -1.96183 | 0.603272 | -3.25199 | 0.001567 | 0.049064 | 1 |

|          |           |          |           |            |       |          |          |   |       |          |          |          |          |          |          |          |   |
|----------|-----------|----------|-----------|------------|-------|----------|----------|---|-------|----------|----------|----------|----------|----------|----------|----------|---|
| ENSG0000 | remission | Inflamed | WISP1     | protein_cc | chr8  | 1.34E+08 | 1.34E+08 | + | 3844  | 516.3652 | 0.00716  | -1.67115 | 0.513963 | -3.2515  | 0.00157  | 0.049064 | 1 |
| ENSG0000 | remission | Inflamed | IGKV3-11  | IG_V_gene  | chr2  | 89326668 | 89327228 | - | 392   | 33944.01 | 0        | -1.49112 | 0.458643 | -3.25116 | 0.001572 | 0.049064 | 1 |
| ENSG0000 | remission | Inflamed | LY6G6C    | protein_cc | chr6  | 31686425 | 31689622 | - | 1103  | 8.670644 | 0.124105 | 0.997234 | 0.306738 | 3.251095 | 0.001572 | 0.049064 | 1 |
| ENSG0000 | remission | Inflamed | RP11-274E | pseudoger  | chr5  | 97549106 | 97549825 | + | 720   | 87.94272 | 0        | -0.54377 | 0.167272 | -3.25082 | 0.001573 | 0.049064 | 1 |
| ENSG0000 | remission | Inflamed | DLL3      | protein_cc | chr19 | 39989535 | 39999121 | + | 2618  | 4.682578 | 0.221957 | -0.87879 | 0.270367 | -3.25037 | 0.001575 | 0.049075 | 1 |
| ENSG0000 | remission | Inflamed | TFDP2     | protein_cc | chr3  | 1.42E+08 | 1.42E+08 | - | 11895 | 1008.019 | 0        | 0.584866 | 0.179996 | 3.249335 | 0.001581 | 0.049178 | 1 |
| ENSG0000 | remission | Inflamed | CALR      | protein_cc | chr19 | 13049392 | 13055303 | + | 2714  | 35812.37 | 0        | -0.39273 | 0.120879 | -3.24894 | 0.001583 | 0.049182 | 1 |
| ENSG0000 | remission | Inflamed | RP11-20D  | lincRNA    | chr12 | 8940853  | 8948385  | + | 2279  | 11.51074 | 0.126492 | -0.92118 | 0.283672 | -3.24735 | 0.001591 | 0.049291 | 1 |
| ENSG0000 | remission | Inflamed | RP11-109  | antisense  | chr17 | 11857206 | 11880911 | - | 463   | 1.539379 | 0.546539 | 0.478652 | 0.147398 | 3.247335 | 0.001591 | 0.049291 | 1 |
| ENSG0000 | remission | Inflamed | CPNE5     | protein_cc | chr6  | 36708552 | 36807778 | - | 4067  | 1716.451 | 0        | -0.83601 | 0.25749  | -3.24676 | 0.001594 | 0.049291 | 1 |
| ENSG0000 | remission | Inflamed | PSME1     | protein_cc | chr14 | 24605367 | 24608176 | + | 1781  | 7026.921 | 0        | -0.33123 | 0.102017 | -3.24675 | 0.001594 | 0.049291 | 1 |
| ENSG0000 | remission | Inflamed | GALNT12   | protein_cc | chr9  | 1.02E+08 | 1.02E+08 | + | 2824  | 3677.613 | 0        | 1.079032 | 0.332482 | 3.245384 | 0.001601 | 0.049447 | 1 |
| ENSG0000 | remission | Inflamed | RP1-249H  | lincRNA    | chr6  | 1.14E+08 | 1.14E+08 | - | 2755  | 88.66587 | 0.009547 | 1.300069 | 0.400636 | 3.245011 | 0.001602 | 0.049448 | 1 |
| ENSG0000 | remission | Inflamed | RP11-120k | sense_intr | chr13 | 1.14E+08 | 1.14E+08 | + | 649   | 3.572792 | 0.334129 | 0.718909 | 0.22162  | 3.243875 | 0.001608 | 0.049568 | 1 |
| ENSG0000 | remission | Inflamed | MT3       | protein_cc | chr16 | 56622986 | 56625000 | + | 1837  | 9.128878 | 0.281623 | 0.936273 | 0.288793 | 3.242026 | 0.001618 | 0.049801 | 1 |
| ENSG0000 | remission | Inflamed | BASP1     | protein_cc | chr5  | 17065707 | 17276943 | + | 2133  | 1786.964 | 0        | -1.20162 | 0.37069  | -3.24157 | 0.00162  | 0.049815 | 1 |
| ENSG0000 | remission | Inflamed | PTN       | protein_cc | chr7  | 1.37E+08 | 1.37E+08 | - | 1713  | 152.3198 | 0        | 1.037849 | 0.320261 | 3.24063  | 0.001625 | 0.049864 | 1 |
| ENSG0000 | remission | Inflamed | RP11-38P2 | lincRNA    | chr3  | 1.53E+08 | 1.53E+08 | + | 2050  | 202.9427 | 0.004773 | 1.338677 | 0.413106 | 3.240516 | 0.001625 | 0.049864 | 1 |
| ENSG0000 | remission | Inflamed | LINC00482 | lincRNA    | chr17 | 79277571 | 79283048 | - | 2197  | 167.6134 | 0        | 0.866941 | 0.267714 | 3.238304 | 0.001637 | 0.050142 | 1 |
| ENSG0000 | remission | Inflamed | HAPLN3    | protein_cc | chr15 | 89420519 | 89438857 | - | 3524  | 905.6348 | 0        | -1.29092 | 0.398677 | -3.23801 | 0.001638 | 0.050142 | 1 |
| ENSG0000 | remission | Inflamed | RP11-500C | antisense  | chr10 | 1.24E+08 | 1.24E+08 | + | 951   | 14.41766 | 0.026253 | 0.740052 | 0.228576 | 3.237659 | 0.00164  | 0.050142 | 1 |
| ENSG0000 | remission | Inflamed | GPR4      | protein_cc | chr19 | 46093022 | 46105466 | - | 3145  | 313.0286 | 0.002387 | -1.3011  | 0.401973 | -3.2368  | 0.001645 | 0.050166 | 1 |
| ENSG0000 | remission | Inflamed | CTC-297N  | lincRNA    | chr17 | 10561859 | 10562399 | - | 541   | 2.494033 | 0.417661 | 0.631138 | 0.194991 | 3.236756 | 0.001645 | 0.050166 | 1 |
| ENSG0000 | remission | Inflamed | RP11-120k | sense_intr | chr13 | 1.14E+08 | 1.14E+08 | + | 647   | 3.749403 | 0.336516 | 0.778911 | 0.240677 | 3.236326 | 0.001647 | 0.050166 | 1 |
| ENSG0000 | remission | Inflamed | KIAA0930  | protein_cc | chr22 | 45586219 | 45636650 | - | 10019 | 3982.141 | 0        | -0.41317 | 0.127687 | -3.2358  | 0.00165  | 0.050166 | 1 |
| ENSG0000 | remission | Inflamed | RP11-960L | lincRNA    | chr16 | 81771853 | 81801311 | + | 1772  | 32.60859 | 0.023866 | -1.11117 | 0.343433 | -3.23549 | 0.001652 | 0.050166 | 1 |
| ENSG0000 | remission | Inflamed | LINC0093C | lincRNA    | chr15 | 93111048 | 93115272 | - | 1657  | 19.32458 | 0.097852 | 1.200555 | 0.371079 | 3.235311 | 0.001652 | 0.050166 | 1 |
| ENSG0000 | remission | Inflamed | RP11-536C | lincRNA    | chr9  | 13406379 | 13433052 | - | 2576  | 43.92363 | 0.081146 | -1.32091 | 0.408371 | -3.23459 | 0.001656 | 0.050223 | 1 |
| ENSG0000 | remission | Inflamed | IL23A     | protein_cc | chr12 | 56732663 | 56734193 | + | 1041  | 58.35322 | 0.019093 | -1.56961 | 0.485333 | -3.23409 | 0.001659 | 0.050245 | 1 |
| ENSG0000 | remission | Inflamed | KCNG2     | protein_cc | chr18 | 77623668 | 77660184 | + | 2162  | 10.92363 | 0.147971 | -1.01825 | 0.314987 | -3.23269 | 0.001666 | 0.050378 | 1 |
| ENSG0000 | remission | Inflamed | CD55      | protein_cc | chr1  | 2.07E+08 | 2.08E+08 | + | 4477  | 7389.764 | 0        | -1.12101 | 0.34679  | -3.23252 | 0.001667 | 0.050378 | 1 |
| ENSG0000 | remission | Inflamed | ITPRIPL1  | protein_cc | chr2  | 96991069 | 96994091 | + | 2495  | 102.3938 | 0        | -0.77217 | 0.238945 | -3.23158 | 0.001672 | 0.050471 | 1 |
| ENSG0000 | remission | Inflamed | CCDC13    | protein_cc | chr3  | 42734155 | 42814745 | - | 4966  | 51.73031 | 0.004773 | 0.807695 | 0.250059 | 3.230015 | 0.00168  | 0.050646 | 1 |
| ENSG0000 | remission | Inflamed | CTC-459F4 | lincRNA    | chr19 | 28284371 | 28409771 | + | 5141  | 173.7542 | 0        | 0.392136 | 0.121414 | 3.229753 | 0.001682 | 0.050646 | 1 |
| ENSG0000 | remission | Inflamed | RP11-469F | antisense  | chr12 | 50345295 | 50356707 | - | 1574  | 3.353222 | 0.644391 | -1.08748 | 0.336748 | -3.22936 | 0.001684 | 0.050648 | 1 |
| ENSG0000 | remission | Inflamed | CTD-2008F | lincRNA    | chr17 | 26559616 | 26562307 | - | 2692  | 12.32936 | 0.174224 | 0.99204  | 0.307234 | 3.228941 | 0.001686 | 0.050648 | 1 |
| ENSG0000 | remission | Inflamed | KRT6A     | protein_cc | chr12 | 52880958 | 52887041 | - | 2928  | 442.5251 | 0.322196 | -3.00646 | 0.93118  | -3.22865 | 0.001688 | 0.050648 | 1 |
| ENSG0000 | remission | Inflamed | EIF4EBP2  | protein_cc | chr10 | 72164135 | 72188374 | + | 7257  | 10725.23 | 0        | 0.509307 | 0.157788 | 3.227784 | 0.001692 | 0.05073  | 1 |
| ENSG0000 | remission | Inflamed | ZDHHC23   | protein_cc | chr3  | 1.14E+08 | 1.14E+08 | + | 7138  | 1170.47  | 0        | 0.984863 | 0.3052   | 3.226945 | 0.001697 | 0.050773 | 1 |
| ENSG0000 | remission | Inflamed | RP11-28B2 | pseudoger  | chr17 | 18889461 | 18889647 | - | 187   | 0.797136 | 0.782816 | 0.404353 | 0.125311 | 3.226793 | 0.001698 | 0.050773 | 1 |

|          |           |          |           |                  |          |          |   |       |          |          |          |          |          |          |          |   |
|----------|-----------|----------|-----------|------------------|----------|----------|---|-------|----------|----------|----------|----------|----------|----------|----------|---|
| ENSG0000 | remission | Inflamed | PSPH      | protein_cc chr7  | 56078744 | 56119297 | - | 2762  | 229.043  | 0        | -0.34479 | 0.106897 | -3.22545 | 0.001705 | 0.050931 | 1 |
| ENSG0000 | remission | Inflamed | CLDN8     | protein_cc chr21 | 31586324 | 31588391 | - | 2068  | 198.4177 | 0.408115 | 2.365249 | 0.733441 | 3.224865 | 0.001708 | 0.050967 | 1 |
| ENSG0000 | remission | Inflamed | PLAU      | protein_cc chr10 | 75668935 | 75677255 | + | 2950  | 4807.981 | 0        | -1.25817 | 0.390272 | -3.22384 | 0.001713 | 0.051075 | 1 |
| ENSG0000 | remission | Inflamed | G6PD      | protein_cc chrX  | 1.54E+08 | 1.54E+08 | - | 3709  | 1935.864 | 0        | -0.47982 | 0.148875 | -3.22299 | 0.001718 | 0.051153 | 1 |
| ENSG0000 | remission | Inflamed | CYP27B1   | protein_cc chr12 | 58156117 | 58162769 | - | 3440  | 140.6611 | 0        | -0.86021 | 0.266948 | -3.22239 | 0.001721 | 0.051193 | 1 |
| ENSG0000 | remission | Inflamed | RAC2      | protein_cc chr22 | 37621301 | 37640488 | - | 2532  | 2379.697 | 0        | -0.85303 | 0.264816 | -3.22212 | 0.001728 | 0.051217 | 1 |
| ENSG0000 | remission | Inflamed | RP11-284E | pseudoger chrX   | 63524927 | 63526613 | - | 1436  | 6.620525 | 0.107399 | 0.747101 | 0.231935 | 3.22116  | 0.001728 | 0.051217 | 1 |
| ENSG0000 | remission | Inflamed | SCAMP5    | protein_cc chr15 | 75249560 | 75313837 | + | 4874  | 1130.535 | 0        | -0.79836 | 0.247885 | -3.22207 | 0.001731 | 0.051217 | 1 |
| ENSG0000 | remission | Inflamed | CCDC147-  | antisense chr10  | 1.06E+08 | 1.06E+08 | - | 795   | 7.178998 | 0.26969  | -1.0943  | 0.339774 | -3.22066 | 0.001731 | 0.051217 | 1 |
| ENSG0000 | remission | Inflamed | PRDM1     | protein_cc chr6  | 1.07E+08 | 1.07E+08 | + | 6369  | 2726.749 | 0        | -0.81763 | 0.253979 | -3.21927 | 0.001738 | 0.051217 | 1 |
| ENSG0000 | remission | Inflamed | SSTR3     | protein_cc chr22 | 37600278 | 37608362 | - | 4520  | 59.72554 | 0.002387 | -1.16334 | 0.361376 | -3.21919 | 0.001739 | 0.051217 | 1 |
| ENSG0000 | remission | Inflamed | RP11-142I | pseudoger chr11  | 1.21E+08 | 1.21E+08 | - | 772   | 0.897375 | 0.782816 | 0.440518 | 0.136845 | 3.219109 | 0.001739 | 0.051217 | 1 |
| ENSG0000 | remission | Inflamed | PHLPP2    | protein_cc chr16 | 71671738 | 71758604 | - | 12493 | 3004.675 | 0        | 1.167573 | 0.36272  | 3.218934 | 0.00174  | 0.051217 | 1 |
| ENSG0000 | remission | Inflamed | RP11-415F | antisense chr3   | 16355946 | 16356494 | + | 549   | 11.47733 | 0.071599 | 0.910617 | 0.282903 | 3.218827 | 0.001741 | 0.051217 | 1 |
| ENSG0000 | remission | Inflamed | PLCE1     | protein_cc chr10 | 95753746 | 96092580 | + | 13282 | 2756.024 | 0        | 1.025299 | 0.318547 | 3.218674 | 0.001742 | 0.051217 | 1 |
| ENSG0000 | remission | Inflamed | ERVW-1    | protein_cc chr7  | 92097694 | 92107300 | - | 6130  | 1.637232 | 0.75179  | 0.872242 | 0.271082 | 3.217629 | 0.001747 | 0.051282 | 1 |
| ENSG0000 | remission | Inflamed | AC079602  | protein_cc chr12 | 1.21E+08 | 1.21E+08 | - | 2455  | 391.7327 | 0.009547 | 1.485925 | 0.461817 | 3.217563 | 0.001748 | 0.051282 | 1 |
| ENSG0000 | remission | Inflamed | ARHGAP8   | protein_cc chr22 | 45098355 | 45258665 | + | 5678  | 209.611  | 0.004773 | 1.122574 | 0.348938 | 3.217113 | 0.00175  | 0.051297 | 1 |
| ENSG0000 | remission | Inflamed | C1QB      | protein_cc chr1  | 22979255 | 22988031 | + | 1601  | 8024.821 | 0        | -0.68863 | 0.214256 | -3.21405 | 0.001767 | 0.051737 | 1 |
| ENSG0000 | remission | Inflamed | TRABD2A   | protein_cc chr2  | 85048774 | 85134132 | - | 8771  | 2907.926 | 0        | 1.067521 | 0.332235 | 3.21315  | 0.001772 | 0.051794 | 1 |
| ENSG0000 | remission | Inflamed | MT-TY     | Mt_tRNA chrM     | 5826     | 5891     | - | 66    | 53.00955 | 0        | 0.785916 | 0.244605 | 3.212998 | 0.001773 | 0.051794 | 1 |
| ENSG0000 | remission | Inflamed | GUCA2A    | protein_cc chr1  | 42628362 | 42630389 | - | 569   | 10387.05 | 0        | 2.26565  | 0.705344 | 3.212121 | 0.001778 | 0.051809 | 1 |
| ENSG0000 | remission | Inflamed | RP11-554I | pseudoger chr12  | 1.08E+08 | 1.08E+08 | - | 679   | 6.584726 | 0.126492 | -0.89659 | 0.279145 | -3.21192 | 0.001779 | 0.051809 | 1 |
| ENSG0000 | remission | Inflamed | RP11-75C5 | lincRNA chr9     | 8858130  | 8862255  | + | 2494  | 40.19093 | 0.002387 | 0.841836 | 0.262103 | 3.211845 | 0.00178  | 0.051809 | 1 |
| ENSG0000 | remission | Inflamed | ANO7      | protein_cc chr2  | 2.42E+08 | 2.42E+08 | + | 5695  | 1426.687 | 0        | 1.232232 | 0.383773 | 3.210839 | 0.001785 | 0.051916 | 1 |
| ENSG0000 | remission | Inflamed | C1orf21   | protein_cc chr1  | 1.84E+08 | 1.85E+08 | + | 10971 | 2657.248 | 0        | 0.5829   | 0.181619 | 3.209469 | 0.001793 | 0.051995 | 1 |
| ENSG0000 | remission | Inflamed | ACP5      | protein_cc chr19 | 11685475 | 11689823 | - | 2814  | 3924.811 | 0        | -0.61958 | 0.19308  | -3.20893 | 0.001796 | 0.051995 | 1 |
| ENSG0000 | remission | Inflamed | SERHL     | processed_chr22  | 42896585 | 42908566 | + | 1742  | 5.520286 | 0.183771 | 0.771803 | 0.24052  | 3.208898 | 0.001796 | 0.051995 | 1 |
| ENSG0000 | remission | Inflamed | CD14      | protein_cc chr5  | 1.4E+08  | 1.4E+08  | - | 1886  | 3427.308 | 0        | -0.67648 | 0.210813 | -3.2089  | 0.001796 | 0.051995 | 1 |
| ENSG0000 | remission | Inflamed | AC010525  | lincRNA chr19    | 56207681 | 56208795 | + | 1115  | 31.58711 | 0.042959 | 0.961681 | 0.299719 | 3.208604 | 0.001798 | 0.051995 | 1 |
| ENSG0000 | remission | Inflamed | RILPL2    | protein_cc chr12 | 1.24E+08 | 1.24E+08 | - | 1435  | 516.969  | 0        | -0.65211 | 0.203368 | -3.20655 | 0.001809 | 0.052275 | 1 |
| ENSG0000 | remission | Inflamed | MYBPC1    | protein_cc chr12 | 1.02E+08 | 1.02E+08 | + | 7385  | 31.71599 | 0.059666 | 1.592734 | 0.496787 | 3.20607  | 0.001812 | 0.052296 | 1 |
| ENSG0000 | remission | Inflamed | ARSD      | protein_cc chrX  | 2822011  | 2847392  | - | 7030  | 3596.747 | 0        | 0.594996 | 0.185639 | 3.205124 | 0.001818 | 0.05233  | 1 |
| ENSG0000 | remission | Inflamed | RHEBL1    | protein_cc chr12 | 49458468 | 49463808 | - | 1290  | 28.09547 | 0.002387 | -0.69273 | 0.216132 | -3.20512 | 0.001818 | 0.05233  | 1 |
| ENSG0000 | remission | Inflamed | HNRNPH1   | pseudoger chr6   | 1.6E+08  | 1.6E+08  | - | 1185  | 6.353222 | 0.198091 | 0.847459 | 0.264433 | 3.204819 | 0.001819 | 0.05233  | 1 |
| ENSG0000 | remission | Inflamed | SCYL1     | protein_cc chr11 | 65292548 | 65306175 | + | 4282  | 3730.542 | 0        | -0.31525 | 0.098391 | -3.20403 | 0.001824 | 0.05239  | 1 |
| ENSG0000 | remission | Inflamed | ADRA2C    | protein_cc chr4  | 3768075  | 3770251  | + | 2177  | 63.44869 | 0.00716  | -1.07251 | 0.334765 | -3.20376 | 0.001825 | 0.05239  | 1 |
| ENSG0000 | remission | Inflamed | CST7      | protein_cc chr20 | 24929866 | 24940564 | + | 930   | 488.6277 | 0        | -1.04522 | 0.326414 | -3.20212 | 0.001835 | 0.052603 | 1 |
| ENSG0000 | remission | Inflamed | OSCAR     | protein_cc chr19 | 54597933 | 54606000 | - | 2069  | 205.2005 | 0        | -1.02897 | 0.321406 | -3.20145 | 0.001839 | 0.052657 | 1 |
| ENSG0000 | remission | Inflamed | SNX30     | protein_cc chr9  | 1.16E+08 | 1.16E+08 | + | 11578 | 2144.167 | 0        | 0.868103 | 0.271415 | 3.198435 | 0.001856 | 0.0531   | 1 |

|          |           |          |           |            |       |          |          |   |       |          |          |          |          |          |          |          |   |
|----------|-----------|----------|-----------|------------|-------|----------|----------|---|-------|----------|----------|----------|----------|----------|----------|----------|---|
| ENSG0000 | remission | Inflamed | MBOAT1    | protein_cc | chr6  | 20100935 | 20212670 | - | 3287  | 1935.103 | 0        | 0.744496 | 0.232811 | 3.197855 | 0.00186  | 0.053103 | 1 |
| ENSG0000 | remission | Inflamed | RP11-428C | lincRNA    | chr11 | 19321430 | 19329905 | + | 648   | 0.988067 | 0.74463  | 0.553692 | 0.173152 | 3.197721 | 0.00186  | 0.053103 | 1 |
| ENSG0000 | remission | Inflamed | RP1-86D1  | sense_intr | chr6  | 1.29E+08 | 1.29E+08 | - | 1904  | 1.360382 | 0.653938 | 0.54144  | 0.169375 | 3.196699 | 0.001866 | 0.053159 | 1 |
| ENSG0000 | remission | Inflamed | GRK6      | protein_cc | chr5  | 1.77E+08 | 1.77E+08 | + | 4355  | 2815.265 | 0        | -0.40485 | 0.126664 | -3.19622 | 0.001869 | 0.053159 | 1 |
| ENSG0000 | remission | Inflamed | HOPX      | protein_cc | chr4  | 57514155 | 57548065 | - | 7759  | 137.494  | 0        | -0.78371 | 0.245204 | -3.19616 | 0.001869 | 0.053159 | 1 |
| ENSG0000 | remission | Inflamed | FKBP2     | protein_cc | chr11 | 64008475 | 64011604 | + | 1608  | 2135.511 | 0        | -0.45803 | 0.143322 | -3.19582 | 0.001871 | 0.053159 | 1 |
| ENSG0000 | remission | Inflamed | FCER1G    | protein_cc | chr1  | 1.61E+08 | 1.61E+08 | + | 964   | 1762.422 | 0        | -0.86973 | 0.272162 | -3.19563 | 0.001873 | 0.053159 | 1 |
| ENSG0000 | remission | Inflamed | SNX32     | protein_cc | chr11 | 65601112 | 65624367 | + | 3966  | 36.38186 | 0.01432  | 0.990973 | 0.310133 | 3.195318 | 0.001874 | 0.053159 | 1 |
| ENSG0000 | remission | Inflamed | IGKV1-5   | IG_V_gene  | chr2  | 89246819 | 89247475 | - | 532   | 33498.81 | 0        | -1.52098 | 0.47618  | -3.19413 | 0.001881 | 0.053255 | 1 |
| ENSG0000 | remission | Inflamed | TTYH3     | protein_cc | chr7  | 2671585  | 2704436  | + | 6129  | 8049.776 | 0        | -0.6546  | 0.204979 | -3.19351 | 0.001885 | 0.053255 | 1 |
| ENSG0000 | remission | Inflamed | CLPB      | protein_cc | chr11 | 72003469 | 72145692 | - | 4232  | 492.0883 | 0        | -0.41693 | 0.130566 | -3.19327 | 0.001886 | 0.053255 | 1 |
| ENSG0000 | remission | Inflamed | STX11     | protein_cc | chr6  | 1.44E+08 | 1.45E+08 | + | 1926  | 326.599  | 0.002387 | -1.01487 | 0.317852 | -3.19291 | 0.001889 | 0.053255 | 1 |
| ENSG0000 | remission | Inflamed | LIMK1     | protein_cc | chr7  | 73497263 | 73536855 | + | 6902  | 1914.938 | 0        | -0.57682 | 0.180662 | -3.19283 | 0.001889 | 0.053255 | 1 |
| ENSG0000 | remission | Inflamed | PORCN     | protein_cc | chrX  | 48367350 | 48379202 | + | 3011  | 267.4033 | 0        | -0.4392  | 0.137611 | -3.19163 | 0.001896 | 0.053255 | 1 |
| ENSG0000 | remission | Inflamed | JAKMIP1   | protein_cc | chr4  | 6027926  | 6202318  | - | 3673  | 45.48449 | 0.011933 | -0.93211 | 0.292083 | -3.19126 | 0.001898 | 0.053255 | 1 |
| ENSG0000 | remission | Inflamed | TMEM72    | antisense  | chr10 | 45306472 | 45455137 | - | 3300  | 5.136038 | 0.188544 | 0.676042 | 0.211849 | 3.191152 | 0.001899 | 0.053255 | 1 |
| ENSG0000 | remission | Inflamed | CNTFR     | protein_cc | chr9  | 34551430 | 34590121 | - | 2094  | 325.2816 | 0.023866 | 1.808324 | 0.566726 | 3.190828 | 0.001901 | 0.053255 | 1 |
| ENSG0000 | remission | Inflamed | AVEN      | protein_cc | chr15 | 34158428 | 34331377 | - | 1808  | 417.6444 | 0        | -0.34149 | 0.10703  | -3.1906  | 0.001902 | 0.053255 | 1 |
| ENSG0000 | remission | Inflamed | RINL      | protein_cc | chr19 | 39358470 | 39368919 | - | 4205  | 412.3365 | 0        | -0.66904 | 0.209711 | -3.19028 | 0.001904 | 0.053255 | 1 |
| ENSG0000 | remission | Inflamed | C3AR1     | protein_cc | chr12 | 8210898  | 8219067  | - | 2145  | 639.8043 | 0        | -0.79561 | 0.249388 | -3.19027 | 0.001904 | 0.053255 | 1 |
| ENSG0000 | remission | Inflamed | CNTN3     | protein_cc | chr3  | 74311719 | 74570291 | - | 5109  | 110.599  | 0.088305 | 1.659926 | 0.520338 | 3.190092 | 0.001905 | 0.053255 | 1 |
| ENSG0000 | remission | Inflamed | XXyac-YM2 | antisense  | chr9  | 90471930 | 90474314 | - | 2014  | 22.36277 | 0.348449 | 1.275021 | 0.399724 | 3.189751 | 0.001907 | 0.053255 | 1 |
| ENSG0000 | remission | Inflamed | SLC4A4    | protein_cc | chr4  | 72053003 | 72437804 | + | 8361  | 4811.757 | 0        | 1.508096 | 0.472813 | 3.189623 | 0.001908 | 0.053255 | 1 |
| ENSG0000 | remission | Inflamed | RP11-483C | sense_intr | chr14 | 27061953 | 27063723 | - | 1771  | 0.945107 | 0.775656 | 0.417128 | 0.130823 | 3.188479 | 0.001915 | 0.053328 | 1 |
| ENSG0000 | remission | Inflamed | RP11-885E | lincRNA    | chr12 | 2870366  | 2879621  | - | 550   | 1.326969 | 0.658711 | 0.51573  | 0.161763 | 3.18818  | 0.001917 | 0.053328 | 1 |
| ENSG0000 | remission | Inflamed | LINC0094C | lincRNA    | chr12 | 2038368  | 2045740  | - | 2350  | 37.62768 | 0.119332 | 1.430812 | 0.448787 | 3.188174 | 0.001917 | 0.053328 | 1 |
| ENSG0000 | remission | Inflamed | SEMA6B    | protein_cc | chr19 | 4542600  | 4559820  | - | 4423  | 1269.081 | 0        | -0.83589 | 0.262269 | -3.18713 | 0.001923 | 0.053385 | 1 |
| ENSG0000 | remission | Inflamed | VAV3      | protein_cc | chr1  | 1.08E+08 | 1.09E+08 | - | 7271  | 1775.506 | 0        | 0.947054 | 0.297163 | 3.186983 | 0.001924 | 0.053385 | 1 |
| ENSG0000 | remission | Inflamed | SYTL2     | protein_cc | chr11 | 85405267 | 85522184 | - | 11248 | 3512.611 | 0        | 1.08435  | 0.340296 | 3.186496 | 0.001927 | 0.053385 | 1 |
| ENSG0000 | remission | Inflamed | CTA-384D  | lincRNA    | chr22 | 50980734 | 50981335 | - | 602   | 22.01671 | 0.038186 | -1.05586 | 0.331355 | -3.18648 | 0.001927 | 0.053385 | 1 |
| ENSG0000 | remission | Inflamed | RPL36AP4  | pseudoger  | chr15 | 90231168 | 90231474 | - | 307   | 10.66826 | 0.145585 | 1.031997 | 0.32409  | 3.184291 | 0.00194  | 0.053663 | 1 |
| ENSG0000 | remission | Inflamed | PFKFB3    | protein_cc | chr10 | 6186881  | 6277495  | + | 5534  | 5324.506 | 0        | -1.10023 | 0.345573 | -3.18377 | 0.001943 | 0.053663 | 1 |
| ENSG0000 | remission | Inflamed | MTND1P2   | pseudoger  | chr1  | 564442   | 564813   | + | 372   | 1429.979 | 0        | 0.700612 | 0.220075 | 3.183509 | 0.001945 | 0.053663 | 1 |
| ENSG0000 | remission | Inflamed | ZNF554    | protein_cc | chr19 | 2819872  | 2835771  | + | 4685  | 219.4702 | 0        | 0.52113  | 0.1637   | 3.183446 | 0.001945 | 0.053663 | 1 |
| ENSG0000 | remission | Inflamed | AC005262  | antisense  | chr19 | 3118663  | 3119302  | - | 452   | 8.343675 | 0.245823 | -1.08356 | 0.340411 | -3.18309 | 0.001948 | 0.053663 | 1 |
| ENSG0000 | remission | Inflamed | ST3GAL2   | protein_cc | chr16 | 70413338 | 70473140 | - | 6287  | 1567.964 | 0        | -0.74201 | 0.23313  | -3.18281 | 0.001949 | 0.053663 | 1 |
| ENSG0000 | remission | Inflamed | ATP13A4   | protein_cc | chr3  | 1.93E+08 | 1.93E+08 | - | 6013  | 153.5704 | 0.00716  | 1.295207 | 0.40699  | 3.182404 | 0.001952 | 0.053675 | 1 |
| ENSG0000 | remission | Inflamed | AANAT     | protein_cc | chr17 | 74449433 | 74466199 | + | 2190  | 2.198091 | 0.470167 | -0.70068 | 0.220262 | -3.18112 | 0.00196  | 0.053835 | 1 |
| ENSG0000 | remission | Inflamed | PPP4R4    | protein_cc | chr14 | 94612465 | 94746072 | + | 4974  | 8.357995 | 0.288783 | -1.13412 | 0.356587 | -3.1805  | 0.001963 | 0.05386  | 1 |
| ENSG0000 | remission | Inflamed | SLCO4A1   | protein_cc | chr20 | 61273797 | 61317137 | + | 4051  | 1070.208 | 0        | -0.75393 | 0.237064 | -3.1803  | 0.001965 | 0.05386  | 1 |

|          |           |          |           |                  |          |          |   |       |          |          |          |          |          |          |          |   |
|----------|-----------|----------|-----------|------------------|----------|----------|---|-------|----------|----------|----------|----------|----------|----------|----------|---|
| ENSG0000 | remission | Inflamed | ADAM22    | protein_cc chr7  | 87563458 | 87832204 | + | 12217 | 87.69451 | 0.00716  | 1.018496 | 0.3204   | 3.17883  | 0.001974 | 0.054052 | 1 |
| ENSG0000 | remission | Inflamed | RP11-982M | lincRNA chr14    | 1.05E+08 | 1.05E+08 | - | 723   | 2.193317 | 0.494033 | 0.571023 | 0.179694 | 3.177757 | 0.00198  | 0.054177 | 1 |
| ENSG0000 | remission | Inflamed | ATF4      | protein_cc chr22 | 39915700 | 39918691 | + | 2515  | 10135.8  | 0        | -0.37241 | 0.117232 | -3.17669 | 0.001987 | 0.054301 | 1 |
| ENSG0000 | remission | Inflamed | B2M       | protein_cc chr15 | 45003675 | 45011075 | + | 3151  | 104741.5 | 0        | -0.49704 | 0.156537 | -3.17521 | 0.001996 | 0.054446 | 1 |
| ENSG0000 | remission | Inflamed | TBPL2     | protein_cc chr14 | 55880259 | 55923444 | - | 2407  | 1.863962 | 0.646778 | 0.611778 | 0.192676 | 3.175168 | 0.001996 | 0.054446 | 1 |
| ENSG0000 | remission | Inflamed | IGHGP     | IG_C_pseu chr14  | 1.06E+08 | 1.06E+08 | - | 1178  | 3141.74  | 0.002387 | -2.01719 | 0.635365 | -3.17485 | 0.001998 | 0.054446 | 1 |
| ENSG0000 | remission | Inflamed | CDHR3     | protein_cc chr7  | 1.06E+08 | 1.06E+08 | + | 9794  | 132.9809 | 0        | 0.832407 | 0.262323 | 3.173221 | 0.002009 | 0.054638 | 1 |
| ENSG0000 | remission | Inflamed | PSENE1    | protein_cc chr19 | 36236015 | 36237911 | + | 1336  | 814.6778 | 0        | -0.49283 | 0.155324 | -3.17294 | 0.00201  | 0.054638 | 1 |
| ENSG0000 | remission | Inflamed | ALDH1A2   | protein_cc chr15 | 58245622 | 58790065 | - | 8622  | 354.9857 | 0.011933 | -1.56576 | 0.493505 | -3.17272 | 0.002012 | 0.054638 | 1 |
| ENSG0000 | remission | Inflamed | COX4I2    | protein_cc chr20 | 30225691 | 30232809 | + | 693   | 51.20048 | 0.004773 | -0.95453 | 0.300955 | -3.17169 | 0.002018 | 0.054759 | 1 |
| ENSG0000 | remission | Inflamed | RP11-363J | lincRNA chr14    | 69649737 | 69680809 | - | 2364  | 4.420048 | 0.193317 | 0.638026 | 0.201195 | 3.171186 | 0.002021 | 0.054788 | 1 |
| ENSG0000 | remission | Inflamed | MLC1      | protein_cc chr22 | 50497820 | 50524331 | - | 4297  | 54.46062 | 0.023866 | -1.31258 | 0.413954 | -3.17084 | 0.002024 | 0.054791 | 1 |
| ENSG0000 | remission | Inflamed | SERPINB3  | protein_cc chr18 | 61322431 | 61329197 | - | 1777  | 137.5728 | 0.46778  | -2.89557 | 0.913503 | -3.16974 | 0.002031 | 0.054879 | 1 |
| ENSG0000 | remission | Inflamed | AGT       | protein_cc chr1  | 2.31E+08 | 2.31E+08 | - | 2291  | 1061.215 | 0        | -1.20603 | 0.38049  | -3.16967 | 0.002031 | 0.054879 | 1 |
| ENSG0000 | remission | Inflamed | PARK2     | protein_cc chr6  | 1.62E+08 | 1.63E+08 | - | 4506  | 58.59427 | 0.00716  | 0.745821 | 0.235397 | 3.168347 | 0.002039 | 0.055048 | 1 |
| ENSG0000 | remission | Inflamed | SPTLC3    | protein_cc chr20 | 12989627 | 13147411 | + | 6377  | 182.8783 | 0.004773 | 0.807966 | 0.255115 | 3.167065 | 0.002048 | 0.055212 | 1 |
| ENSG0000 | remission | Inflamed | ABCG4     | protein_cc chr11 | 1.19E+08 | 1.19E+08 | + | 6268  | 17.40334 | 0.033413 | -0.82603 | 0.260864 | -3.16652 | 0.002051 | 0.05525  | 1 |
| ENSG0000 | remission | Inflamed | HIST1H1C  | protein_cc chr6  | 26055968 | 26056699 | - | 732   | 1408.141 | 0        | -0.6533  | 0.206336 | -3.16618 | 0.002053 | 0.055251 | 1 |
| ENSG0000 | remission | Inflamed | PLA2G7    | protein_cc chr6  | 46671938 | 46703430 | - | 2965  | 707.2053 | 0        | -0.85467 | 0.270041 | -3.16498 | 0.002061 | 0.055347 | 1 |
| ENSG0000 | remission | Inflamed | RP11-392E | pseudoger chr9   | 38543101 | 38543443 | - | 343   | 14.70644 | 0.102625 | 1.004663 | 0.317442 | 3.164867 | 0.002062 | 0.055347 | 1 |
| ENSG0000 | remission | Inflamed | SLC15A3   | protein_cc chr11 | 60704556 | 60720002 | - | 6118  | 1743.453 | 0        | -0.68607 | 0.216792 | -3.16464 | 0.002063 | 0.055347 | 1 |
| ENSG0000 | remission | Inflamed | ECSCR     | protein_cc chr5  | 1.39E+08 | 1.39E+08 | - | 740   | 147.1814 | 0.002387 | -1.01527 | 0.320899 | -3.16385 | 0.002068 | 0.055428 | 1 |
| ENSG0000 | remission | Inflamed | SLC16A3   | protein_cc chr17 | 80186273 | 80219005 | + | 8995  | 7155.663 | 0        | -0.61134 | 0.193377 | -3.16137 | 0.002084 | 0.055759 | 1 |
| ENSG0000 | remission | Inflamed | RP11-100E | lincRNA chr15    | 38276967 | 38354541 | + | 2448  | 6.995227 | 0.412888 | -1.25455 | 0.396847 | -3.16128 | 0.002085 | 0.055759 | 1 |
| ENSG0000 | remission | Inflamed | FAM20C    | protein_cc chr7  | 192969   | 300711   | + | 4629  | 2496.504 | 0        | -0.87689 | 0.277456 | -3.16046 | 0.00209  | 0.055845 | 1 |
| ENSG0000 | remission | Inflamed | PRLR      | protein_cc chr5  | 35048861 | 35230794 | - | 13208 | 445.8234 | 0        | 1.252176 | 0.396249 | 3.160076 | 0.002093 | 0.055855 | 1 |
| ENSG0000 | remission | Inflamed | AKAP7     | protein_cc chr6  | 1.31E+08 | 1.32E+08 | + | 4394  | 375.6516 | 0        | 0.82954  | 0.262562 | 3.15941  | 0.002097 | 0.055914 | 1 |
| ENSG0000 | remission | Inflamed | MCOLN2    | protein_cc chr1  | 85391268 | 85462796 | - | 3440  | 463.2673 | 0.002387 | 1.023986 | 0.324234 | 3.158168 | 0.002105 | 0.056043 | 1 |
| ENSG0000 | remission | Inflamed | CBX2      | protein_cc chr17 | 77751931 | 77761782 | + | 5687  | 156.8401 | 0        | -0.89313 | 0.282813 | -3.15802 | 0.002106 | 0.056043 | 1 |
| ENSG0000 | remission | Inflamed | MDF1      | protein_cc chr6  | 41604620 | 41621984 | + | 2523  | 357.9379 | 0.002387 | -1.18276 | 0.374653 | -3.15695 | 0.002113 | 0.056102 | 1 |
| ENSG0000 | remission | Inflamed | GNB1L     | protein_cc chr22 | 19770747 | 19842462 | - | 6988  | 151.3174 | 0        | -0.46962 | 0.148768 | -3.15673 | 0.002115 | 0.056102 | 1 |
| ENSG0000 | remission | Inflamed | RP11-316F | lincRNA chr9     | 92316566 | 92334585 | + | 822   | 6.687351 | 0.224344 | -0.87869 | 0.278359 | -3.15667 | 0.002115 | 0.056102 | 1 |
| ENSG0000 | remission | Inflamed | CFI       | protein_cc chr4  | 1.11E+08 | 1.11E+08 | - | 3873  | 861.7327 | 0        | -1.24927 | 0.395827 | -3.1561  | 0.002119 | 0.056102 | 1 |
| ENSG0000 | remission | Inflamed | NDUFAF4F  | pseudoger chr3   | 37831412 | 37831936 | - | 525   | 5.298329 | 0.245823 | 0.750979 | 0.237948 | 3.156063 | 0.002119 | 0.056102 | 1 |
| ENSG0000 | remission | Inflamed | LINC0088C | lincRNA chr3     | 1.57E+08 | 1.57E+08 | - | 2018  | 11.64439 | 0.042959 | -0.74343 | 0.235607 | -3.1554  | 0.002123 | 0.056116 | 1 |
| ENSG0000 | remission | Inflamed | CHRD12    | protein_cc chr11 | 74407474 | 74442430 | - | 3073  | 621.5513 | 0.011933 | -2.09157 | 0.663037 | -3.15452 | 0.002129 | 0.056116 | 1 |
| ENSG0000 | remission | Inflamed | ELFN1     | protein_cc chr7  | 1727755  | 1787590  | + | 3845  | 89.04057 | 0.019093 | -1.19605 | 0.379159 | -3.15449 | 0.002129 | 0.056116 | 1 |
| ENSG0000 | remission | Inflamed | SLC25A34  | protein_cc chr1  | 16062900 | 16067891 | + | 3195  | 597.8926 | 0        | 1.048626 | 0.332469 | 3.154058 | 0.002132 | 0.056116 | 1 |
| ENSG0000 | remission | Inflamed | HOXB5     | protein_cc chr17 | 46668619 | 46671323 | - | 2041  | 964.7112 | 0        | 0.911009 | 0.288843 | 3.153999 | 0.002133 | 0.056116 | 1 |
| ENSG0000 | remission | Inflamed | GM2A      | protein_cc chr5  | 1.51E+08 | 1.51E+08 | + | 4479  | 3480.026 | 0        | -0.47124 | 0.149423 | -3.15376 | 0.002134 | 0.056116 | 1 |

|          |           |          |           |                  |          |          |   |      |          |          |          |          |          |          |          |   |
|----------|-----------|----------|-----------|------------------|----------|----------|---|------|----------|----------|----------|----------|----------|----------|----------|---|
| ENSG0000 | remission | Inflamed | FTLP3     | pseudoger chr20  | 4004552  | 4005091  | + | 540  | 181.7661 | 0        | -0.65302 | 0.207077 | -3.15352 | 0.002136 | 0.056116 | 1 |
| ENSG0000 | remission | Inflamed | BFSP2     | protein_cc chr3  | 1.33E+08 | 1.33E+08 | + | 2070 | 18.94988 | 0.059666 | -1.17239 | 0.371786 | -3.1534  | 0.002137 | 0.056116 | 1 |
| ENSG0000 | remission | Inflamed | WDR54     | protein_cc chr2  | 74648805 | 74652882 | + | 2860 | 199.3556 | 0        | -0.5822  | 0.184651 | -3.15296 | 0.00214  | 0.056137 | 1 |
| ENSG0000 | remission | Inflamed | LHX4      | protein_cc chr1  | 1.8E+08  | 1.8E+08  | + | 7324 | 76.179   | 0.00716  | 1.255079 | 0.398222 | 3.151705 | 0.002148 | 0.05616  | 1 |
| ENSG0000 | remission | Inflamed | CD300LB   | protein_cc chr17 | 72517313 | 72527613 | - | 2720 | 103.2888 | 0.002387 | -0.86304 | 0.273841 | -3.1516  | 0.002149 | 0.05616  | 1 |
| ENSG0000 | remission | Inflamed | HMG1P7    | pseudoger chr3   | 93707478 | 93707790 | - | 313  | 4.761337 | 0.238663 | 0.799094 | 0.253563 | 3.151465 | 0.00215  | 0.05616  | 1 |
| ENSG0000 | remission | Inflamed | CHAD      | protein_cc chr17 | 48541857 | 48546327 | - | 1802 | 238.6468 | 0.00716  | 1.68599  | 0.535024 | 3.15124  | 0.002151 | 0.05616  | 1 |
| ENSG0000 | remission | Inflamed | RP11-879F | lincRNA chr18    | 59252979 | 59274149 | - | 1199 | 3.171838 | 0.384248 | -0.76798 | 0.243731 | -3.15091 | 0.002153 | 0.05616  | 1 |
| ENSG0000 | remission | Inflamed | MEF2B     | protein_cc chr19 | 19256377 | 19303400 | - | 2724 | 54.1074  | 0        | -0.87417 | 0.277434 | -3.15091 | 0.002153 | 0.05616  | 1 |
| ENSG0000 | remission | Inflamed | AHCYL2    | protein_cc chr7  | 1.29E+08 | 1.29E+08 | + | 6899 | 11921.99 | 0        | 0.983605 | 0.312235 | 3.15021  | 0.002158 | 0.05621  | 1 |
| ENSG0000 | remission | Inflamed | TRIM69    | protein_cc chr15 | 45021186 | 45060027 | + | 9237 | 1773.785 | 0        | -0.57673 | 0.183103 | -3.14977 | 0.002161 | 0.05621  | 1 |
| ENSG0000 | remission | Inflamed | PLEKHD1   | protein_cc chr14 | 69951409 | 69995215 | + | 5044 | 3.140811 | 0.369928 | -0.72684 | 0.230791 | -3.14936 | 0.002164 | 0.05621  | 1 |
| ENSG0000 | remission | Inflamed | TRPV4     | protein_cc chr12 | 1.1E+08  | 1.1E+08  | - | 3765 | 120.2721 | 0        | -0.92871 | 0.294914 | -3.1491  | 0.002165 | 0.05621  | 1 |
| ENSG0000 | remission | Inflamed | LAMP5     | protein_cc chr20 | 9495005  | 9511171  | + | 2042 | 97.63962 | 0        | -0.97239 | 0.308789 | -3.14903 | 0.002166 | 0.05621  | 1 |
| ENSG0000 | remission | Inflamed | SPECC1L   | protein_cc chr22 | 24666786 | 24813708 | + | 7323 | 1443.835 | 0        | 0.49047  | 0.155803 | 3.148022 | 0.002173 | 0.05633  | 1 |
| ENSG0000 | remission | Inflamed | ODF3B     | protein_cc chr22 | 50968139 | 50971009 | - | 2301 | 721.4391 | 0        | -0.82973 | 0.263601 | -3.14768 | 0.002175 | 0.056336 | 1 |
| ENSG0000 | remission | Inflamed | FAM47E    | protein_cc chr4  | 77135193 | 77204933 | + | 9508 | 51.40811 | 0.002387 | 1.023089 | 0.325189 | 3.146143 | 0.002185 | 0.05652  | 1 |
| ENSG0000 | remission | Inflamed | LINC01006 | processed_chr7   | 1.56E+08 | 1.56E+08 | - | 2246 | 54.91647 | 0        | 0.845286 | 0.268687 | 3.14599  | 0.002186 | 0.05652  | 1 |
| ENSG0000 | remission | Inflamed | ANKDD1B   | protein_cc chr5  | 74907284 | 74967671 | + | 3287 | 115.1671 | 0.004773 | 1.038089 | 0.330031 | 3.145424 | 0.00219  | 0.056564 | 1 |
| ENSG0000 | remission | Inflamed | NAPA-AS1  | antisense chr19  | 47987539 | 48004854 | + | 1894 | 105.3484 | 0        | -0.65739 | 0.20909  | -3.14405 | 0.0022   | 0.056749 | 1 |
| ENSG0000 | remission | Inflamed | ALDOB     | protein_cc chr9  | 1.04E+08 | 1.04E+08 | - | 2451 | 5763.129 | 0.004773 | -2.01989 | 0.642565 | -3.14347 | 0.002204 | 0.056765 | 1 |
| ENSG0000 | remission | Inflamed | SLC20A2   | protein_cc chr8  | 42273993 | 42397069 | - | 6641 | 3112.487 | 0        | 0.622142 | 0.197924 | 3.14333  | 0.002205 | 0.056765 | 1 |
| ENSG0000 | remission | Inflamed | RP5-1091M | antisense chrX   | 70403409 | 70418025 | - | 726  | 25.12411 | 0.011933 | -0.75846 | 0.241351 | -3.14257 | 0.00221  | 0.056797 | 1 |
| ENSG0000 | remission | Inflamed | KIAA1683  | protein_cc chr19 | 18367908 | 18385319 | - | 9153 | 357.4773 | 0        | 0.922564 | 0.293575 | 3.142519 | 0.00221  | 0.056797 | 1 |
| ENSG0000 | remission | Inflamed | CELA1     | protein_cc chr12 | 51722227 | 51740463 | - | 952  | 2.486874 | 0.448687 | -0.60158 | 0.191497 | -3.14148 | 0.002217 | 0.056925 | 1 |
| ENSG0000 | remission | Inflamed | CD53      | protein_cc chr1  | 1.11E+08 | 1.11E+08 | + | 2081 | 2379.532 | 0        | -0.88441 | 0.281607 | -3.14059 | 0.002223 | 0.056962 | 1 |
| ENSG0000 | remission | Inflamed | RP11-611C | antisense chr12  | 69235068 | 69237017 | - | 785  | 15.92363 | 0.057279 | 0.927917 | 0.295493 | 3.140235 | 0.002226 | 0.056962 | 1 |
| ENSG0000 | remission | Inflamed | RP11-701F | lincRNA chr4     | 1.86E+08 | 1.86E+08 | - | 986  | 22.83771 | 0.393795 | -1.69577 | 0.540019 | -3.14019 | 0.002226 | 0.056962 | 1 |
| ENSG0000 | remission | Inflamed | C10orf54  | protein_cc chr10 | 73507316 | 73533255 | - | 5128 | 6179.597 | 0        | -0.53679 | 0.170951 | -3.14001 | 0.002227 | 0.056962 | 1 |
| ENSG0000 | remission | Inflamed | NRAP      | protein_cc chr10 | 1.15E+08 | 1.15E+08 | - | 5721 | 56.10501 | 0.062053 | 1.518092 | 0.48353  | 3.139605 | 0.00223  | 0.056978 | 1 |
| ENSG0000 | remission | Inflamed | IGLV1-40  | IG_V_gene chr22  | 22764098 | 22764614 | + | 407  | 19093.81 | 0        | -1.51316 | 0.482119 | -3.13856 | 0.002237 | 0.057107 | 1 |
| ENSG0000 | remission | Inflamed | NIPAL1    | protein_cc chr4  | 47916159 | 48042188 | + | 5981 | 1251.017 | 0        | 1.182353 | 0.376841 | 3.137538 | 0.002244 | 0.057197 | 1 |
| ENSG0000 | remission | Inflamed | PTGIR     | protein_cc chr19 | 47123725 | 47128375 | - | 3546 | 231.2864 | 0        | -1.1342  | 0.361506 | -3.13743 | 0.002245 | 0.057197 | 1 |
| ENSG0000 | remission | Inflamed | OGFR      | protein_cc chr20 | 61436187 | 61445352 | + | 4702 | 3188.752 | 0        | -0.43348 | 0.138192 | -3.13677 | 0.00225  | 0.057209 | 1 |
| ENSG0000 | remission | Inflamed | NFAM1     | protein_cc chr22 | 42776416 | 42828401 | - | 5817 | 1393.563 | 0        | -0.95452 | 0.304377 | -3.13599 | 0.002255 | 0.057209 | 1 |
| ENSG0000 | remission | Inflamed | BID       | protein_cc chr22 | 18216906 | 18257536 | - | 4418 | 962.8353 | 0        | -0.46545 | 0.148436 | -3.13567 | 0.002258 | 0.057209 | 1 |
| ENSG0000 | remission | Inflamed | MEOX1     | protein_cc chr17 | 41717756 | 41739322 | - | 2707 | 455.7255 | 0        | -1.07071 | 0.341469 | -3.1356  | 0.002258 | 0.057209 | 1 |
| ENSG0000 | remission | Inflamed | SLC39A2   | protein_cc chr14 | 21467414 | 21470030 | + | 1575 | 38.12649 | 0.152745 | 1.387926 | 0.44266  | 3.135427 | 0.002259 | 0.057209 | 1 |
| ENSG0000 | remission | Inflamed | IL21      | protein_cc chr4  | 1.24E+08 | 1.24E+08 | - | 629  | 4.300716 | 0.4821   | -0.95879 | 0.305813 | -3.13521 | 0.002261 | 0.057209 | 1 |
| ENSG0000 | remission | Inflamed | RP11-496G | lincRNA chr4     | 24661479 | 24673191 | + | 2195 | 10.51313 | 0.157518 | 1.104683 | 0.352377 | 3.134945 | 0.002263 | 0.057209 | 1 |

|          |           |          |           |                  |          |          |   |       |          |          |          |          |          |          |          |   |
|----------|-----------|----------|-----------|------------------|----------|----------|---|-------|----------|----------|----------|----------|----------|----------|----------|---|
| ENSG0000 | remission | Inflamed | DYSF      | protein_cc chr2  | 71680852 | 71913898 | + | 8386  | 1916.869 | 0        | -1.16416 | 0.371359 | -3.13487 | 0.002263 | 0.057209 | 1 |
| ENSG0000 | remission | Inflamed | SH2B2     | protein_cc chr7  | 1.02E+08 | 1.02E+08 | + | 2236  | 285.8067 | 0        | -0.87614 | 0.279557 | -3.13402 | 0.002269 | 0.057304 | 1 |
| ENSG0000 | remission | Inflamed | RP11-295F | antisense chr10  | 13724521 | 13726874 | + | 1978  | 0.878282 | 0.782816 | 0.444583 | 0.141899 | 3.133088 | 0.002276 | 0.057415 | 1 |
| ENSG0000 | remission | Inflamed | HLA-C     | protein_cc chr6  | 31236526 | 31239907 | - | 2507  | 62651.59 | 0        | -0.41243 | 0.131699 | -3.13164 | 0.002286 | 0.057579 | 1 |
| ENSG0000 | remission | Inflamed | KRT16     | protein_cc chr17 | 39766030 | 39772151 | - | 2475  | 80.31026 | 0.365155 | -2.4481  | 0.781755 | -3.13155 | 0.002287 | 0.057579 | 1 |
| ENSG0000 | remission | Inflamed | MT-TD     | Mt_tRNA chrM     | 7518     | 7585     | + | 68    | 159.2053 | 0.038186 | 1.153797 | 0.368509 | 3.130992 | 0.00229  | 0.057623 | 1 |
| ENSG0000 | remission | Inflamed | FRAS1     | protein_cc chr4  | 78978724 | 79465423 | + | 18960 | 304.148  | 0.01432  | 1.546373 | 0.493955 | 3.130597 | 0.002293 | 0.05763  | 1 |
| ENSG0000 | remission | Inflamed | PLCD1     | protein_cc chr3  | 38048987 | 38071253 | - | 4314  | 2238.666 | 0        | 0.75729  | 0.24192  | 3.130335 | 0.002295 | 0.05763  | 1 |
| ENSG0000 | remission | Inflamed | RAMP2     | protein_cc chr17 | 40910465 | 40915059 | + | 1148  | 587.0024 | 0        | -0.93369 | 0.298302 | -3.13001 | 0.002297 | 0.057634 | 1 |
| ENSG0000 | remission | Inflamed | LRR37A2   | protein_cc chr17 | 44588877 | 44633016 | + | 6756  | 169.3795 | 0        | 0.842022 | 0.269081 | 3.129257 | 0.002303 | 0.057662 | 1 |
| ENSG0000 | remission | Inflamed | RP11-112L | lincRNA chr20    | 48780001 | 48782639 | - | 733   | 3.684964 | 0.336516 | -0.73019 | 0.233354 | -3.12909 | 0.002304 | 0.057662 | 1 |
| ENSG0000 | remission | Inflamed | FERMT3    | protein_cc chr11 | 63974150 | 63991354 | + | 3062  | 2478.16  | 0        | -0.69948 | 0.223587 | -3.12842 | 0.002309 | 0.057662 | 1 |
| ENSG0000 | remission | Inflamed | DOK3      | protein_cc chr5  | 1.77E+08 | 1.77E+08 | - | 4821  | 1724.079 | 0        | -1.00033 | 0.319767 | -3.1283  | 0.00231  | 0.057662 | 1 |
| ENSG0000 | remission | Inflamed | CTD-2655t | antisense chr11  | 67889520 | 67897985 | + | 776   | 1.057279 | 0.713604 | 0.410613 | 0.131265 | 3.12813  | 0.002311 | 0.057662 | 1 |
| ENSG0000 | remission | Inflamed | RP11-586l | lincRNA chr4     | 6202460  | 6240044  | + | 2547  | 7.546539 | 0.236277 | -0.98528 | 0.315012 | -3.12774 | 0.002314 | 0.057662 | 1 |
| ENSG0000 | remission | Inflamed | MAGEH1    | protein_cc chrX  | 55478538 | 55479998 | + | 1461  | 347.2172 | 0        | -0.70188 | 0.224407 | -3.12769 | 0.002314 | 0.057662 | 1 |
| ENSG0000 | remission | Inflamed | IL36RN    | protein_cc chr2  | 1.14E+08 | 1.14E+08 | + | 3299  | 5.300716 | 0.577566 | -1.19259 | 0.381338 | -3.12739 | 0.002316 | 0.057662 | 1 |
| ENSG0000 | remission | Inflamed | STXBP5-AS | antisense chr6   | 1.47E+08 | 1.48E+08 | - | 6011  | 104.9141 | 0        | 0.970611 | 0.310419 | 3.126778 | 0.002321 | 0.057716 | 1 |
| ENSG0000 | remission | Inflamed | CTD-2540f | lincRNA chr19    | 33795942 | 33800293 | + | 404   | 9.699284 | 0.085919 | 0.734321 | 0.23488  | 3.12637  | 0.002323 | 0.057734 | 1 |
| ENSG0000 | remission | Inflamed | AC093585  | antisense chr2   | 2.42E+08 | 2.42E+08 | - | 428   | 0.952267 | 0.768496 | 0.423809 | 0.135604 | 3.125347 | 0.002331 | 0.057862 | 1 |
| ENSG0000 | remission | Inflamed | TAGAP     | protein_cc chr6  | 1.59E+08 | 1.59E+08 | - | 4089  | 1374.663 | 0        | -1.17487 | 0.375952 | -3.12504 | 0.002333 | 0.057862 | 1 |
| ENSG0000 | remission | Inflamed | GOLGA7B   | protein_cc chr10 | 99627889 | 99631294 | + | 3406  | 6.439141 | 0.224344 | 0.899473 | 0.287971 | 3.123479 | 0.002344 | 0.058088 | 1 |
| ENSG0000 | remission | Inflamed | RP11-566k | antisense chr16  | 89986235 | 89989070 | - | 985   | 2.393795 | 0.441527 | -0.67779 | 0.217037 | -3.12292 | 0.002348 | 0.058097 | 1 |
| ENSG0000 | remission | Inflamed | FUT7      | protein_cc chr9  | 1.4E+08  | 1.4E+08  | - | 2584  | 85.6611  | 0.009547 | -1.32643 | 0.424755 | -3.12282 | 0.002349 | 0.058097 | 1 |
| ENSG0000 | remission | Inflamed | TFAP2C    | protein_cc chr20 | 55204358 | 55214339 | + | 3112  | 138.8807 | 0.009547 | -1.15251 | 0.369198 | -3.12166 | 0.002357 | 0.05825  | 1 |
| ENSG0000 | remission | Inflamed | DAP       | protein_cc chr5  | 10679342 | 10761384 | - | 3361  | 7880.74  | 0        | -0.26518 | 0.084965 | -3.12102 | 0.002362 | 0.05831  | 1 |
| ENSG0000 | remission | Inflamed | SLC22A5   | protein_cc chr5  | 1.32E+08 | 1.32E+08 | + | 12788 | 2252.761 | 0        | 0.861805 | 0.276165 | 3.120622 | 0.002365 | 0.058328 | 1 |
| ENSG0000 | remission | Inflamed | GMFG      | protein_cc chr19 | 39818993 | 39833012 | - | 1490  | 584.327  | 0        | -0.88611 | 0.284013 | -3.11997 | 0.00237  | 0.058344 | 1 |
| ENSG0000 | remission | Inflamed | FAM162A   | protein_cc chr3  | 1.22E+08 | 1.22E+08 | + | 3793  | 2145.36  | 0        | 0.707478 | 0.226768 | 3.119828 | 0.002371 | 0.058344 | 1 |
| ENSG0000 | remission | Inflamed | SLC38A5   | protein_cc chrX  | 48316920 | 48328644 | - | 4016  | 1283.504 | 0        | -0.58036 | 0.186035 | -3.11962 | 0.002372 | 0.058344 | 1 |
| ENSG0000 | remission | Inflamed | LINC0046C | lincRNA chr13    | 1.07E+08 | 1.07E+08 | + | 1152  | 3.28401  | 0.477327 | -0.90781 | 0.291076 | -3.1188  | 0.002378 | 0.058384 | 1 |
| ENSG0000 | remission | Inflamed | SIRPB1    | protein_cc chr20 | 1544167  | 1600707  | - | 6091  | 299.5322 | 0        | -1.26413 | 0.405327 | -3.11879 | 0.002378 | 0.058384 | 1 |
| ENSG0000 | remission | Inflamed | SLC9A2    | protein_cc chr2  | 1.03E+08 | 1.03E+08 | + | 5984  | 2460.513 | 0.004773 | 1.426554 | 0.457544 | 3.117848 | 0.002385 | 0.058396 | 1 |
| ENSG0000 | remission | Inflamed | MTMR11    | protein_cc chr1  | 1.5E+08  | 1.5E+08  | - | 4591  | 5468.012 | 0        | 0.862725 | 0.276708 | 3.117819 | 0.002386 | 0.058396 | 1 |
| ENSG0000 | remission | Inflamed | KLK15     | protein_cc chr19 | 51328545 | 51340469 | - | 2289  | 221.9857 | 0.011933 | 1.789238 | 0.573892 | 3.117726 | 0.002386 | 0.058396 | 1 |
| ENSG0000 | remission | Inflamed | STMND1    | protein_cc chr6  | 17102489 | 17131603 | + | 2882  | 14.358   | 0.224344 | 1.069045 | 0.342915 | 3.117519 | 0.002388 | 0.058396 | 1 |
| ENSG0000 | remission | Inflamed | MANF      | protein_cc chr3  | 51422478 | 51426828 | + | 2111  | 2922.42  | 0        | -0.55702 | 0.178707 | -3.11696 | 0.002392 | 0.058425 | 1 |
| ENSG0000 | remission | Inflamed | ZNF33B    | processed_chr10  | 43069633 | 43134016 | - | 2810  | 91.29356 | 0        | 0.50922  | 0.163392 | 3.116557 | 0.002395 | 0.058425 | 1 |
| ENSG0000 | remission | Inflamed | RP11-490k | pseudoger chr1   | 31736092 | 31736528 | - | 437   | 9.128878 | 0.140811 | 0.863823 | 0.2772   | 3.116244 | 0.002397 | 0.058425 | 1 |
| ENSG0000 | remission | Inflamed | RETNLB    | protein_cc chr3  | 1.08E+08 | 1.08E+08 | - | 1106  | 1189.601 | 0.009547 | 1.810637 | 0.581097 | 3.115892 | 0.0024   | 0.058425 | 1 |

|          |           |          |           |            |       |          |          |   |       |          |          |          |          |          |          |          |   |
|----------|-----------|----------|-----------|------------|-------|----------|----------|---|-------|----------|----------|----------|----------|----------|----------|----------|---|
| ENSG0000 | remission | Inflamed | IGKV2-18  | IG_V_pseu  | chr2  | 89428207 | 89428966 | - | 343   | 4.498807 | 0.391408 | -1.03553 | 0.332371 | -3.11557 | 0.002402 | 0.058425 | 1 |
| ENSG0000 | remission | Inflamed | GPX1P1    | pseudoger  | chrX  | 13396854 | 13397459 | - | 606   | 146.6802 | 0.042959 | -0.73136 | 0.234754 | -3.11541 | 0.002403 | 0.058425 | 1 |
| ENSG0000 | remission | Inflamed | AKAP1     | protein_cc | chr17 | 55162453 | 55198710 | + | 5399  | 6864.687 | 0        | 0.68898  | 0.221163 | 3.115254 | 0.002405 | 0.058425 | 1 |
| ENSG0000 | remission | Inflamed | ALOX12B   | protein_cc | chr17 | 7975954  | 7991021  | - | 2656  | 12.72792 | 0.081146 | 0.872286 | 0.280047 | 3.114789 | 0.002408 | 0.058455 | 1 |
| ENSG0000 | remission | Inflamed | RP11-497f | pseudoger  | chr5  | 69758071 | 69775042 | + | 1104  | 9.331742 | 0.054893 | -0.77412 | 0.248556 | -3.11449 | 0.00241  | 0.058456 | 1 |
| ENSG0000 | remission | Inflamed | RP11-410E | lincRNA    | chr2  | 1.87E+08 | 1.87E+08 | - | 2202  | 4.570406 | 0.24821  | 0.783807 | 0.251767 | 3.11323  | 0.00242  | 0.05854  | 1 |
| ENSG0000 | remission | Inflamed | FRZB      | protein_cc | chr2  | 1.84E+08 | 1.84E+08 | - | 3162  | 929.8735 | 0        | 0.80975  | 0.260148 | 3.112653 | 0.002424 | 0.05854  | 1 |
| ENSG0000 | remission | Inflamed | PEX11A    | protein_cc | chr15 | 90220995 | 90234014 | - | 3171  | 581.4487 | 0        | 0.756773 | 0.243156 | 3.112294 | 0.002427 | 0.05854  | 1 |
| ENSG0000 | remission | Inflamed | PDIA4     | protein_cc | chr7  | 1.49E+08 | 1.49E+08 | - | 3277  | 15493.18 | 0        | -0.45325 | 0.145637 | -3.11219 | 0.002427 | 0.05854  | 1 |
| ENSG0000 | remission | Inflamed | IGKV1D-1f | IG_V_gene  | chr2  | 90139078 | 90139580 | + | 378   | 825.9021 | 0.002387 | -1.52756 | 0.490836 | -3.11216 | 0.002428 | 0.05854  | 1 |
| ENSG0000 | remission | Inflamed | RP11-182J | antisense  | chr15 | 85154920 | 85158200 | - | 1018  | 0.97852  | 0.742243 | 0.460912 | 0.148102 | 3.112123 | 0.002428 | 0.05854  | 1 |
| ENSG0000 | remission | Inflamed | PLOD1     | protein_cc | chr1  | 11994262 | 12035595 | + | 5320  | 4224.115 | 0        | -0.50901 | 0.163569 | -3.11193 | 0.002429 | 0.05854  | 1 |
| ENSG0000 | remission | Inflamed | KLK3      | protein_cc | chr19 | 51358171 | 51364020 | + | 4639  | 105.1957 | 0.02864  | 1.493132 | 0.479921 | 3.111205 | 0.002435 | 0.058617 | 1 |
| ENSG0000 | remission | Inflamed | RP11-375f | antisense  | chr1  | 1.66E+08 | 1.66E+08 | + | 594   | 4.768496 | 0.24821  | 0.792069 | 0.254692 | 3.109913 | 0.002444 | 0.058642 | 1 |
| ENSG0000 | remission | Inflamed | P2RY1     | protein_cc | chr3  | 1.53E+08 | 1.53E+08 | + | 3106  | 390.6086 | 0.002387 | 1.227456 | 0.394697 | 3.109867 | 0.002445 | 0.058642 | 1 |
| ENSG0000 | remission | Inflamed | NSFP1     | pseudoger  | chr17 | 44450221 | 44564507 | + | 1471  | 6.460621 | 0.424821 | 0.74901  | 0.240855 | 3.109799 | 0.002445 | 0.058642 | 1 |
| ENSG0000 | remission | Inflamed | HIST1H2Bf | protein_cc | chr6  | 26115101 | 26124154 | - | 834   | 82.53461 | 0        | -0.91771 | 0.295124 | -3.10959 | 0.002447 | 0.058642 | 1 |
| ENSG0000 | remission | Inflamed | HHIPL2    | protein_cc | chr1  | 2.23E+08 | 2.23E+08 | - | 3287  | 11.49642 | 0.071599 | 0.865649 | 0.278381 | 3.109583 | 0.002447 | 0.058642 | 1 |
| ENSG0000 | remission | Inflamed | C2CD4B    | protein_cc | chr15 | 62455734 | 62457482 | - | 1579  | 238.3126 | 0        | -0.9834  | 0.316339 | -3.1087  | 0.002454 | 0.058748 | 1 |
| ENSG0000 | remission | Inflamed | AC003090  | lincRNA    | chr7  | 25632971 | 25790614 | - | 2968  | 17.61337 | 0.050119 | 0.945335 | 0.304368 | 3.105889 | 0.002475 | 0.059169 | 1 |
| ENSG0000 | remission | Inflamed | NFE4      | antisense  | chr7  | 1.03E+08 | 1.03E+08 | + | 1072  | 7.823389 | 0.374702 | -1.21146 | 0.390065 | -3.10579 | 0.002476 | 0.059169 | 1 |
| ENSG0000 | remission | Inflamed | TSHZ1     | protein_cc | chr18 | 72922710 | 73001905 | + | 8281  | 1362.632 | 0        | 0.627954 | 0.202209 | 3.105472 | 0.002478 | 0.059174 | 1 |
| ENSG0000 | remission | Inflamed | AC002511  | lincRNA    | chr19 | 35923859 | 35925544 | - | 1000  | 62.52267 | 0.009547 | 0.952974 | 0.306913 | 3.105031 | 0.002481 | 0.059174 | 1 |
| ENSG0000 | remission | Inflamed | SEC14L1   | protein_cc | chr17 | 75082798 | 75213179 | + | 10846 | 5528.599 | 0        | -0.62354 | 0.200826 | -3.10488 | 0.002483 | 0.059174 | 1 |
| ENSG0000 | remission | Inflamed | EPHX2     | protein_cc | chr8  | 27348296 | 27403081 | + | 4473  | 2283.286 | 0        | 0.875824 | 0.282125 | 3.104378 | 0.002486 | 0.059212 | 1 |
| ENSG0000 | remission | Inflamed | OTUD7A    | protein_cc | chr15 | 31775329 | 32162992 | - | 6624  | 83.00955 | 0.011933 | 0.670432 | 0.215995 | 3.103919 | 0.00249  | 0.059229 | 1 |
| ENSG0000 | remission | Inflamed | PTGES     | protein_cc | chr9  | 1.33E+08 | 1.33E+08 | - | 1896  | 176.2291 | 0        | -1.25583 | 0.404647 | -3.10351 | 0.002493 | 0.059229 | 1 |
| ENSG0000 | remission | Inflamed | TNFAIP6   | protein_cc | chr2  | 1.52E+08 | 1.52E+08 | + | 1577  | 173.4845 | 0.00716  | -1.56456 | 0.504153 | -3.10334 | 0.002494 | 0.059229 | 1 |
| ENSG0000 | remission | Inflamed | BLVRA     | protein_cc | chr7  | 43798279 | 43846939 | + | 1819  | 413.5298 | 0        | -0.65979 | 0.212622 | -3.10311 | 0.002496 | 0.059229 | 1 |
| ENSG0000 | remission | Inflamed | RP5-857K2 | pseudoger  | chr1  | 569756   | 570302   | + | 547   | 5465.215 | 0        | 0.702674 | 0.226534 | 3.101848 | 0.002506 | 0.059405 | 1 |
| ENSG0000 | remission | Inflamed | LRRC2     | protein_cc | chr3  | 46556913 | 46621589 | - | 5622  | 53.60859 | 0.01432  | 0.966629 | 0.31171  | 3.101054 | 0.002512 | 0.059423 | 1 |
| ENSG0000 | remission | Inflamed | ZNF763    | protein_cc | chr19 | 12035890 | 12091196 | + | 3044  | 56.34129 | 0.002387 | 0.839508 | 0.270728 | 3.100932 | 0.002513 | 0.059423 | 1 |
| ENSG0000 | remission | Inflamed | CAMK2N2   | protein_cc | chr3  | 1.84E+08 | 1.84E+08 | - | 1362  | 10.98568 | 0.052506 | -0.96201 | 0.31024  | -3.10087 | 0.002513 | 0.059423 | 1 |
| ENSG0000 | remission | Inflamed | CHI3L2    | protein_cc | chr1  | 1.12E+08 | 1.12E+08 | + | 3295  | 372.3294 | 0        | -1.81995 | 0.587006 | -3.10039 | 0.002517 | 0.059458 | 1 |
| ENSG0000 | remission | Inflamed | APOH      | protein_cc | chr17 | 64208151 | 64252643 | - | 1332  | 3.856802 | 0.451074 | 0.792373 | 0.255647 | 3.09948  | 0.002524 | 0.059494 | 1 |
| ENSG0000 | remission | Inflamed | GNAI2     | protein_cc | chr3  | 50263724 | 50296787 | + | 7650  | 9413.78  | 0        | -0.62914 | 0.202987 | -3.09944 | 0.002525 | 0.059494 | 1 |
| ENSG0000 | remission | Inflamed | CEND1     | protein_cc | chr11 | 787104   | 790123   | - | 1649  | 14.26969 | 0.050119 | -0.96707 | 0.31204  | -3.09918 | 0.002527 | 0.059494 | 1 |
| ENSG0000 | remission | Inflamed | TRPV2     | protein_cc | chr17 | 16318856 | 16340317 | + | 3414  | 1010.11  | 0        | -0.69647 | 0.224737 | -3.09903 | 0.002528 | 0.059494 | 1 |
| ENSG0000 | remission | Inflamed | AQP7      | protein_cc | chr9  | 33384765 | 33402643 | - | 2091  | 200.6396 | 0.00716  | 1.508879 | 0.487034 | 3.098098 | 0.002535 | 0.05961  | 1 |
| ENSG0000 | remission | Inflamed | MS4A3     | protein_cc | chr11 | 59824060 | 59838601 | + | 2095  | 3.639618 | 0.410501 | -0.72244 | 0.233285 | -3.09683 | 0.002545 | 0.059646 | 1 |



|          |           |          |           |            |       |          |          |   |      |          |          |          |          |          |          |          |   |
|----------|-----------|----------|-----------|------------|-------|----------|----------|---|------|----------|----------|----------|----------|----------|----------|----------|---|
| ENSG0000 | remission | Inflamed | MST1L     | pseudoger  | chr1  | 17081405 | 17096732 | - | 5295 | 378.9618 | 0.009547 | 1.701056 | 0.549304 | 3.096749 | 0.002545 | 0.059646 | 1 |
| ENSG0000 | remission | Inflamed | KPTN      | protein_cc | chr19 | 47978401 | 47987525 | - | 2124 | 215.8759 | 0        | -0.31545 | 0.101878 | -3.0964  | 0.002548 | 0.059646 | 1 |
| ENSG0000 | remission | Inflamed | RP11-22P6 | antisense  | chr16 | 28890278 | 28891241 | - | 583  | 13.39857 | 0.00716  | -0.66783 | 0.21569  | -3.09624 | 0.00255  | 0.059646 | 1 |
| ENSG0000 | remission | Inflamed | PRAM1     | protein_cc | chr19 | 8554940  | 8567996  | - | 3763 | 132.7613 | 0        | -0.84699 | 0.273558 | -3.09622 | 0.00255  | 0.059646 | 1 |
| ENSG0000 | remission | Inflamed | ACP2      | protein_cc | chr11 | 47260853 | 47270457 | - | 3484 | 2668.389 | 0        | -0.26589 | 0.085878 | -3.09616 | 0.00255  | 0.059646 | 1 |
| ENSG0000 | remission | Inflamed | Y_RNA     | misc_RNA   | chr10 | 1.29E+08 | 1.29E+08 | + | 97   | 1.011933 | 0.73031  | 0.466256 | 0.150613 | 3.095726 | 0.002554 | 0.059673 | 1 |
| ENSG0000 | remission | Inflamed | AF064860  | sense_ove  | chr21 | 41002198 | 41098012 | + | 544  | 2.673031 | 0.522673 | 0.876491 | 0.283338 | 3.093449 | 0.002571 | 0.060027 | 1 |
| ENSG0000 | remission | Inflamed | Y_RNA     | antisense  | chr8  | 81396796 | 81397854 | - | 1059 | 41.90931 | 0.009547 | 0.758007 | 0.245066 | 3.093074 | 0.002574 | 0.060027 | 1 |
| ENSG0000 | remission | Inflamed | CTD-2132f | sense_intr | chr17 | 40192731 | 40195135 | - | 761  | 23.76611 | 0.038186 | 0.919106 | 0.29722  | 3.092345 | 0.00258  | 0.060027 | 1 |
| ENSG0000 | remission | Inflamed | TXNDC2    | protein_cc | chr18 | 9885763  | 9889272  | + | 3352 | 2.026253 | 0.513126 | -0.59795 | 0.193387 | -3.092   | 0.002583 | 0.060027 | 1 |
| ENSG0000 | remission | Inflamed | ZSWIM5    | protein_cc | chr1  | 45482071 | 45771881 | - | 6046 | 778.2601 | 0        | 0.804398 | 0.260155 | 3.091995 | 0.002583 | 0.060027 | 1 |
| ENSG0000 | remission | Inflamed | SERPINB9  | protein_cc | chr6  | 2887500  | 2903514  | - | 4118 | 1617.594 | 0        | -0.96487 | 0.312068 | -3.09187 | 0.002584 | 0.060027 | 1 |
| ENSG0000 | remission | Inflamed | RIMS4     | protein_cc | chr20 | 43380449 | 43438979 | - | 5206 | 47.26014 | 0.140811 | 1.402732 | 0.453697 | 3.091778 | 0.002585 | 0.060027 | 1 |
| ENSG0000 | remission | Inflamed | C9orf116  | protein_cc | chr9  | 1.38E+08 | 1.38E+08 | - | 1864 | 43.05012 | 0        | -0.74384 | 0.240702 | -3.09029 | 0.002596 | 0.060248 | 1 |
| ENSG0000 | remission | Inflamed | GDE1      | protein_cc | chr16 | 19513015 | 19533467 | - | 4412 | 3942.981 | 0        | 0.424314 | 0.137333 | 3.089681 | 0.002601 | 0.060297 | 1 |
| ENSG0000 | remission | Inflamed | RP11-424l | lincRNA    | chr15 | 1.02E+08 | 1.02E+08 | + | 762  | 2.536993 | 0.51074  | -0.73996 | 0.239512 | -3.08945 | 0.002603 | 0.060297 | 1 |
| ENSG0000 | remission | Inflamed | AC017002  | lincRNA    | chr2  | 1.12E+08 | 1.12E+08 | + | 757  | 9.98568  | 0.088305 | -0.9236  | 0.299125 | -3.08767 | 0.002617 | 0.060574 | 1 |
| ENSG0000 | remission | Inflamed | SMOX      | protein_cc | chr20 | 4101627  | 4168394  | + | 4943 | 857.6874 | 0        | -0.95345 | 0.308841 | -3.08719 | 0.002621 | 0.060609 | 1 |
| ENSG0000 | remission | Inflamed | GPSM3     | protein_cc | chr6  | 32158543 | 32163300 | - | 1854 | 2022.683 | 0        | -0.77978 | 0.252695 | -3.08585 | 0.002632 | 0.060805 | 1 |
| ENSG0000 | remission | Inflamed | TNFRSF8   | protein_cc | chr1  | 12123434 | 12204264 | + | 3738 | 102.315  | 0.011933 | -1.33582 | 0.432994 | -3.08508 | 0.002638 | 0.060896 | 1 |
| ENSG0000 | remission | Inflamed | RARRES3   | protein_cc | chr11 | 63304281 | 63313934 | + | 1299 | 2199.408 | 0        | -0.74086 | 0.24017  | -3.08473 | 0.002641 | 0.060907 | 1 |
| ENSG0000 | remission | Inflamed | MSRB1     | protein_cc | chr16 | 1988211  | 1993327  | - | 2157 | 1192.236 | 0        | -0.53575 | 0.17371  | -3.08416 | 0.002646 | 0.060961 | 1 |
| ENSG0000 | remission | Inflamed | ADPRHL2   | protein_cc | chr1  | 36554476 | 36559533 | + | 1668 | 899.5728 | 0        | -0.25473 | 0.082607 | -3.08368 | 0.00265  | 0.060997 | 1 |
| ENSG0000 | remission | Inflamed | MYL5      | protein_cc | chr4  | 667369   | 675822   | + | 4305 | 362.1337 | 0        | 0.523066 | 0.169641 | 3.083379 | 0.002652 | 0.060999 | 1 |
| ENSG0000 | remission | Inflamed | IGLV6-57  | IG_V_gene  | chr22 | 22550113 | 22550860 | + | 623  | 4690.31  | 0        | -1.60041 | 0.519213 | -3.08239 | 0.00266  | 0.061067 | 1 |
| ENSG0000 | remission | Inflamed | RP11-498E | lincRNA    | chr9  | 1.25E+08 | 1.25E+08 | + | 477  | 15.35561 | 0.02148  | 0.657538 | 0.213343 | 3.082068 | 0.002663 | 0.061067 | 1 |
| ENSG0000 | remission | Inflamed | MIR3185   | miRNA      | chr17 | 46801770 | 46801837 | - | 68   | 3.167064 | 0.575179 | 0.979342 | 0.317791 | 3.081715 | 0.002666 | 0.061067 | 1 |
| ENSG0000 | remission | Inflamed | FES       | protein_cc | chr15 | 91426925 | 91439006 | + | 4241 | 918.358  | 0        | -0.6526  | 0.211767 | -3.0817  | 0.002666 | 0.061067 | 1 |
| ENSG0000 | remission | Inflamed | ATP9A     | protein_cc | chr20 | 50213053 | 50385173 | - | 8317 | 5574.496 | 0        | 0.737269 | 0.239271 | 3.081315 | 0.002669 | 0.061067 | 1 |
| ENSG0000 | remission | Inflamed | KLHDC7B   | protein_cc | chr22 | 50986462 | 50989451 | + | 2990 | 124.8854 | 0.002387 | -0.97588 | 0.316736 | -3.08105 | 0.002671 | 0.061067 | 1 |
| ENSG0000 | remission | Inflamed | LINC00694 | lincRNA    | chr3  | 44462619 | 44465499 | - | 732  | 33.77804 | 0.016706 | -1.19819 | 0.388937 | -3.08067 | 0.002674 | 0.061067 | 1 |
| ENSG0000 | remission | Inflamed | TLL8      | protein_cc | chr22 | 50453552 | 50495364 | - | 2707 | 2.210024 | 0.615752 | -0.7497  | 0.24336  | -3.08062 | 0.002675 | 0.061067 | 1 |
| ENSG0000 | remission | Inflamed | FMO1      | protein_cc | chr1  | 1.71E+08 | 1.71E+08 | + | 3574 | 52.63246 | 0.159905 | -1.71224 | 0.555892 | -3.08016 | 0.002678 | 0.061067 | 1 |
| ENSG0000 | remission | Inflamed | TMEM255   | protein_cc | chr13 | 1.14E+08 | 1.15E+08 | + | 2242 | 134.8711 | 0        | -0.84472 | 0.274251 | -3.08009 | 0.002679 | 0.061067 | 1 |
| ENSG0000 | remission | Inflamed | IGHV4-34  | IG_V_gene  | chr14 | 1.07E+08 | 1.07E+08 | - | 400  | 10580.37 | 0        | -1.69838 | 0.551459 | -3.0798  | 0.002681 | 0.061067 | 1 |
| ENSG0000 | remission | Inflamed | CCR3      | protein_cc | chr3  | 46205096 | 46308197 | + | 3647 | 82.42005 | 0.00716  | -1.33265 | 0.432733 | -3.0796  | 0.002683 | 0.061067 | 1 |
| ENSG0000 | remission | Inflamed | CD300C    | protein_cc | chr17 | 72537247 | 72542282 | - | 1517 | 121.5776 | 0        | -0.88915 | 0.288765 | -3.07914 | 0.002687 | 0.061102 | 1 |
| ENSG0000 | remission | Inflamed | RP11-380F | antisense  | chr4  | 23562546 | 23770275 | + | 703  | 9.334129 | 0.362768 | 1.176416 | 0.382096 | 3.078853 | 0.002689 | 0.061102 | 1 |
| ENSG0000 | remission | Inflamed | RP11-66B2 | antisense  | chr15 | 1.01E+08 | 1.01E+08 | - | 5911 | 175.2864 | 0        | 0.563927 | 0.183211 | 3.078025 | 0.002696 | 0.061204 | 1 |
| ENSG0000 | remission | Inflamed | RAMP3     | protein_cc | chr7  | 45197390 | 45225901 | + | 1427 | 755.6158 | 0        | -0.99143 | 0.322204 | -3.07702 | 0.002704 | 0.061306 | 1 |

|          |           |          |           |                  |          |          |   |       |          |          |          |          |          |          |          |   |
|----------|-----------|----------|-----------|------------------|----------|----------|---|-------|----------|----------|----------|----------|----------|----------|----------|---|
| ENSG0000 | remission | Inflamed | NFKBIE    | protein_cc chr6  | 44225903 | 44233500 | - | 2556  | 1054.086 | 0        | -0.53163 | 0.172779 | -3.07691 | 0.002705 | 0.061306 | 1 |
| ENSG0000 | remission | Inflamed | CA2       | protein_cc chr8  | 86376081 | 86393722 | + | 2123  | 25945.15 | 0        | 1.275046 | 0.414468 | 3.076345 | 0.00271  | 0.06136  | 1 |
| ENSG0000 | remission | Inflamed | CLMN      | protein_cc chr14 | 95648277 | 95786243 | - | 15701 | 5691.217 | 0        | 0.784965 | 0.255191 | 3.075994 | 0.002713 | 0.061373 | 1 |
| ENSG0000 | remission | Inflamed | WDR78     | protein_cc chr1  | 67278568 | 67390570 | - | 6700  | 183.7828 | 0        | 1.020989 | 0.332058 | 3.07473  | 0.002723 | 0.06155  | 1 |
| ENSG0000 | remission | Inflamed | LILRA6    | protein_cc chr19 | 54720737 | 54746649 | - | 4190  | 337.8091 | 0        | -1.23259 | 0.40091  | -3.07449 | 0.002725 | 0.06155  | 1 |
| ENSG0000 | remission | Inflamed | ADAM8     | protein_cc chr10 | 1.35E+08 | 1.35E+08 | - | 4780  | 1523.549 | 0        | -1.07004 | 0.348221 | -3.07287 | 0.002739 | 0.06176  | 1 |
| ENSG0000 | remission | Inflamed | APOL2     | protein_cc chr22 | 36622256 | 36636000 | - | 3477  | 3123.263 | 0        | -0.7406  | 0.241016 | -3.07281 | 0.002739 | 0.06176  | 1 |
| ENSG0000 | remission | Inflamed | CRISP3    | protein_cc chr6  | 49695097 | 49712150 | - | 2247  | 1.653938 | 0.785203 | -0.63828 | 0.20776  | -3.07222 | 0.002744 | 0.061781 | 1 |
| ENSG0000 | remission | Inflamed | RP11-582J | antisense chr8   | 22398358 | 22402918 | - | 4076  | 8.198091 | 0.176611 | 0.954026 | 0.310541 | 3.072141 | 0.002745 | 0.061781 | 1 |
| ENSG0000 | remission | Inflamed | IGKV3-7   | IG_V_gene chr2   | 89277987 | 89278600 | - | 445   | 34.50597 | 0.047733 | -1.31754 | 0.429079 | -3.07063 | 0.002758 | 0.062015 | 1 |
| ENSG0000 | remission | Inflamed | CRYBA4    | protein_cc chr22 | 27017928 | 27026636 | + | 811   | 5.940334 | 0.157518 | -0.86564 | 0.281952 | -3.07016 | 0.002761 | 0.062051 | 1 |
| ENSG0000 | remission | Inflamed | RP11-536k | antisense chr10  | 5976233  | 5987863  | - | 3912  | 39.68974 | 0        | -0.81226 | 0.264602 | -3.06974 | 0.002765 | 0.062062 | 1 |
| ENSG0000 | remission | Inflamed | CDK5      | protein_cc chr7  | 1.51E+08 | 1.51E+08 | - | 2938  | 332.821  | 0        | -0.41334 | 0.13466  | -3.06954 | 0.002767 | 0.062062 | 1 |
| ENSG0000 | remission | Inflamed | TRIP6     | protein_cc chr7  | 1E+08    | 1E+08    | + | 2802  | 1541.821 | 0        | -0.43785 | 0.142702 | -3.06828 | 0.002777 | 0.062248 | 1 |
| ENSG0000 | remission | Inflamed | COL11A2   | protein_cc chr6  | 33130458 | 33160276 | - | 6740  | 52.93795 | 0.004773 | 0.770699 | 0.251269 | 3.067228 | 0.002786 | 0.062395 | 1 |
| ENSG0000 | remission | Inflamed | SERPINB7  | protein_cc chr18 | 61420169 | 61472604 | + | 2596  | 468.926  | 0.281623 | -2.92509 | 0.953921 | -3.06639 | 0.002793 | 0.06244  | 1 |
| ENSG0000 | remission | Inflamed | QPCT      | protein_cc chr2  | 37571717 | 37600465 | + | 2599  | 348.2434 | 0        | -0.71502 | 0.23322  | -3.06588 | 0.002798 | 0.06244  | 1 |
| ENSG0000 | remission | Inflamed | AP000569  | lincRNA chr21    | 35339403 | 35340874 | - | 591   | 2.159905 | 0.536993 | -0.59306 | 0.193447 | -3.06577 | 0.002799 | 0.06244  | 1 |
| ENSG0000 | remission | Inflamed | COG1      | protein_cc chr17 | 71189129 | 71204646 | + | 5061  | 2020.234 | 0        | 0.371497 | 0.121176 | 3.065755 | 0.002799 | 0.06244  | 1 |
| ENSG0000 | remission | Inflamed | LAT2      | protein_cc chr7  | 73613982 | 73644161 | + | 4542  | 804.0215 | 0        | -0.74333 | 0.242497 | -3.06533 | 0.002802 | 0.06244  | 1 |
| ENSG0000 | remission | Inflamed | RELT      | protein_cc chr11 | 73087309 | 73108519 | + | 6322  | 669.7947 | 0        | -0.78775 | 0.256987 | -3.06532 | 0.002803 | 0.06244  | 1 |
| ENSG0000 | remission | Inflamed | STC1      | protein_cc chr8  | 23699428 | 23712320 | - | 4149  | 723.8377 | 0.004773 | -1.87162 | 0.610713 | -3.06465 | 0.002808 | 0.062514 | 1 |
| ENSG0000 | remission | Inflamed | CSF2RB    | protein_cc chr22 | 37309670 | 37336491 | + | 5061  | 4896.308 | 0        | -1.09863 | 0.358639 | -3.06332 | 0.00282  | 0.062704 | 1 |
| ENSG0000 | remission | Inflamed | LL22NC03- | protein_cc chr22 | 47857048 | 47882860 | - | 1090  | 8.315036 | 0.200477 | 1.024131 | 0.334344 | 3.063105 | 0.002822 | 0.062704 | 1 |
| ENSG0000 | remission | Inflamed | RP11-647F | pseudoger chr4   | 1.22E+08 | 1.22E+08 | + | 436   | 2.109785 | 0.577566 | 0.663789 | 0.216785 | 3.061972 | 0.002831 | 0.06276  | 1 |
| ENSG0000 | remission | Inflamed | RNF152    | protein_cc chr18 | 59475296 | 59561480 | - | 9924  | 877.3819 | 0        | 1.055692 | 0.344804 | 3.061718 | 0.002834 | 0.06276  | 1 |
| ENSG0000 | remission | Inflamed | GPR55     | protein_cc chr2  | 2.32E+08 | 2.32E+08 | - | 4130  | 194.2959 | 0.002387 | -0.80686 | 0.26353  | -3.06172 | 0.002834 | 0.06276  | 1 |
| ENSG0000 | remission | Inflamed | RP11-148C | pseudoger chr3   | 1.08E+08 | 1.08E+08 | - | 97    | 0.911695 | 0.794749 | 0.452659 | 0.147845 | 3.061701 | 0.002834 | 0.06276  | 1 |
| ENSG0000 | remission | Inflamed | RP11-1101 | antisense chr5   | 1.77E+08 | 1.77E+08 | + | 431   | 2.093079 | 0.5179   | 0.637088 | 0.208119 | 3.061173 | 0.002838 | 0.062809 | 1 |
| ENSG0000 | remission | Inflamed | IGLV2-11  | IG_V_gene chr22  | 23134980 | 23135496 | + | 400   | 12821.25 | 0        | -1.38586 | 0.45287  | -3.06018 | 0.002847 | 0.062946 | 1 |
| ENSG0000 | remission | Inflamed | TNF       | protein_cc chr6  | 31543344 | 31546113 | + | 1676  | 253.4057 | 0        | -0.92195 | 0.301384 | -3.05904 | 0.002857 | 0.063112 | 1 |
| ENSG0000 | remission | Inflamed | PPM1L     | protein_cc chr3  | 1.6E+08  | 1.61E+08 | + | 12447 | 567.8401 | 0        | 0.718553 | 0.234916 | 3.058765 | 0.002859 | 0.063112 | 1 |
| ENSG0000 | remission | Inflamed | MIR196A1  | miRNA chr17      | 46709852 | 46709921 | - | 70    | 33.28878 | 0.057279 | 1.056681 | 0.345535 | 3.0581   | 0.002865 | 0.063187 | 1 |
| ENSG0000 | remission | Inflamed | CTSK      | protein_cc chr1  | 1.51E+08 | 1.51E+08 | - | 1887  | 2342.391 | 0        | -0.91962 | 0.300767 | -3.05758 | 0.002869 | 0.063199 | 1 |
| ENSG0000 | remission | Inflamed | IGLV3-21  | IG_V_gene chr22  | 23054174 | 23055688 | + | 602   | 10603.73 | 0        | -1.55307 | 0.507958 | -3.05748 | 0.00287  | 0.063199 | 1 |
| ENSG0000 | remission | Inflamed | RP11-125E | antisense chr9   | 2422702  | 2641395  | - | 4399  | 13.04535 | 0.221957 | 1.146344 | 0.375058 | 3.056446 | 0.002879 | 0.063323 | 1 |
| ENSG0000 | remission | Inflamed | SLC43A3   | protein_cc chr11 | 57174427 | 57195053 | - | 3664  | 533.5871 | 0        | -0.68487 | 0.224084 | -3.05629 | 0.002881 | 0.063323 | 1 |
| ENSG0000 | remission | Inflamed | CD74      | protein_cc chr5  | 1.5E+08  | 1.5E+08  | - | 3184  | 107875.7 | 0        | -0.6279  | 0.205501 | -3.05548 | 0.002888 | 0.063427 | 1 |
| ENSG0000 | remission | Inflamed | AC011747  | lincRNA chr2     | 8699963  | 8723922  | - | 8956  | 115.3986 | 0        | 0.935279 | 0.306171 | 3.054758 | 0.002894 | 0.063513 | 1 |
| ENSG0000 | remission | Inflamed | CTD-2269f | antisense chr5   | 83680245 | 83786583 | + | 1370  | 14.70167 | 0.016706 | 0.676138 | 0.221363 | 3.054431 | 0.002897 | 0.063523 | 1 |

|          |           |          |           |            |       |          |          |   |       |          |          |          |          |          |          |          |   |
|----------|-----------|----------|-----------|------------|-------|----------|----------|---|-------|----------|----------|----------|----------|----------|----------|----------|---|
| ENSG0000 | remission | Inflamed | RP11-592E | pseudoger  | chr10 | 51287081 | 51371070 | - | 2353  | 3.066826 | 0.369928 | 0.646239 | 0.211596 | 3.054125 | 0.0029   | 0.063529 | 1 |
| ENSG0000 | remission | Inflamed | PCK1      | protein_cc | chr20 | 56136136 | 56141513 | + | 5164  | 4598.964 | 0        | 2.413308 | 0.790317 | 3.053596 | 0.002904 | 0.063579 | 1 |
| ENSG0000 | remission | Inflamed | LAYN      | protein_cc | chr11 | 1.11E+08 | 1.11E+08 | + | 2938  | 153.1002 | 0        | -0.6905  | 0.226167 | -3.05304 | 0.002909 | 0.063634 | 1 |
| ENSG0000 | remission | Inflamed | MYBPH     | protein_cc | chr1  | 2.03E+08 | 2.03E+08 | - | 1805  | 13.54893 | 0.217184 | -1.20969 | 0.396296 | -3.05249 | 0.002914 | 0.063687 | 1 |
| ENSG0000 | remission | Inflamed | TAS1R3    | protein_cc | chr1  | 1266694  | 1270686  | + | 3433  | 382.4224 | 0        | -1.19765 | 0.392465 | -3.05162 | 0.002922 | 0.063803 | 1 |
| ENSG0000 | remission | Inflamed | GS1-115G  | pseudoger  | chr1  | 1.85E+08 | 1.85E+08 | + | 1325  | 1.054893 | 0.720764 | 0.507572 | 0.166447 | 3.049451 | 0.002941 | 0.064148 | 1 |
| ENSG0000 | remission | Inflamed | SCPEP1    | protein_cc | chr17 | 55055466 | 55084129 | + | 3853  | 1439.403 | 0        | -0.4829  | 0.158363 | -3.0493  | 0.002943 | 0.064148 | 1 |
| ENSG0000 | remission | Inflamed | DIO3OS    | lincRNA    | chr14 | 1.02E+08 | 1.02E+08 | - | 5603  | 412.179  | 0        | 0.964533 | 0.316365 | 3.048797 | 0.002947 | 0.064193 | 1 |
| ENSG0000 | remission | Inflamed | SIRPA     | protein_cc | chr20 | 1875154  | 1920543  | + | 4032  | 3339.537 | 0        | -0.76659 | 0.251532 | -3.04767 | 0.002957 | 0.06436  | 1 |
| ENSG0000 | remission | Inflamed | SHKBP1    | protein_cc | chr19 | 41082757 | 41097305 | + | 3936  | 3452.442 | 0        | -0.39184 | 0.128603 | -3.0469  | 0.002964 | 0.064458 | 1 |
| ENSG0000 | remission | Inflamed | ITGB2     | protein_cc | chr21 | 46305868 | 46351904 | - | 6797  | 6183.776 | 0        | -0.84496 | 0.277395 | -3.04605 | 0.002972 | 0.064474 | 1 |
| ENSG0000 | remission | Inflamed | RP11-333E | pseudoger  | chr4  | 39974748 | 39975062 | - | 315   | 1.988067 | 0.436754 | 0.516293 | 0.169498 | 3.046022 | 0.002972 | 0.064474 | 1 |
| ENSG0000 | remission | Inflamed | RP3-405J1 | pseudoger  | chr12 | 50611445 | 50612126 | - | 354   | 2.155131 | 0.486874 | 0.57612  | 0.18914  | 3.045998 | 0.002972 | 0.064474 | 1 |
| ENSG0000 | remission | Inflamed | BMP3      | protein_cc | chr4  | 81952119 | 81978685 | + | 5734  | 475.0621 | 0.038186 | 2.295586 | 0.753875 | 3.04505  | 0.002981 | 0.064606 | 1 |
| ENSG0000 | remission | Inflamed | AC011526  | lincRNA    | chr19 | 41960074 | 42006559 | - | 3884  | 110.2959 | 0.002387 | -0.97877 | 0.321621 | -3.04323 | 0.002997 | 0.064911 | 1 |
| ENSG0000 | remission | Inflamed | AP001046  | lincRNA    | chr21 | 44783212 | 44786446 | + | 2816  | 1.367542 | 0.706444 | -0.65527 | 0.215391 | -3.04222 | 0.003007 | 0.064958 | 1 |
| ENSG0000 | remission | Inflamed | HOXD-AS1  | antisense  | chr2  | 1.77E+08 | 1.77E+08 | - | 4851  | 1647.928 | 0        | 0.794664 | 0.261215 | 3.042186 | 0.003007 | 0.064958 | 1 |
| ENSG0000 | remission | Inflamed | TUBBP5    | pseudoger  | chr9  | 1.41E+08 | 1.41E+08 | + | 2712  | 75.39857 | 0.050119 | 0.822848 | 0.27048  | 3.042177 | 0.003007 | 0.064958 | 1 |
| ENSG0000 | remission | Inflamed | ZDHHC7    | protein_cc | chr16 | 85007787 | 85045141 | - | 3947  | 3599.253 | 0        | 0.369212 | 0.1214   | 3.041291 | 0.003015 | 0.065064 | 1 |
| ENSG0000 | remission | Inflamed | RPS3AP40  | pseudoger  | chr11 | 67693122 | 67693902 | - | 781   | 1.293556 | 0.692124 | 0.570836 | 0.187708 | 3.041078 | 0.003017 | 0.065064 | 1 |
| ENSG0000 | remission | Inflamed | IGKV3D-11 | IG_V_gene  | chr2  | 90211643 | 90212253 | + | 442   | 263.3604 | 0.002387 | -1.30776 | 0.430067 | -3.04083 | 0.003019 | 0.065064 | 1 |
| ENSG0000 | remission | Inflamed | MYL6B     | protein_cc | chr12 | 56546040 | 56553431 | + | 3264  | 424.9881 | 0        | -0.5611  | 0.184593 | -3.03966 | 0.00303  | 0.065125 | 1 |
| ENSG0000 | remission | Inflamed | CATSPER2  | protein_cc | chr15 | 43920701 | 43960316 | - | 8403  | 242.5656 | 0.004773 | 1.163237 | 0.382694 | 3.039601 | 0.003031 | 0.065125 | 1 |
| ENSG0000 | remission | Inflamed | RP11-16E1 | lincRNA    | chr15 | 31514202 | 31523041 | - | 1563  | 284.642  | 0        | -0.88196 | 0.290186 | -3.03928 | 0.003034 | 0.065125 | 1 |
| ENSG0000 | remission | Inflamed | RP11-617C | antisense  | chr4  | 38614322 | 38666504 | - | 3101  | 35.06683 | 0.033413 | 1.019752 | 0.335555 | 3.038998 | 0.003036 | 0.065125 | 1 |
| ENSG0000 | remission | Inflamed | AQP8      | protein_cc | chr16 | 25227052 | 25240261 | + | 1421  | 12233.81 | 0.019093 | 3.217302 | 1.058698 | 3.038925 | 0.003037 | 0.065125 | 1 |
| ENSG0000 | remission | Inflamed | IGSF10    | protein_cc | chr3  | 1.51E+08 | 1.51E+08 | - | 11727 | 58.65394 | 0.011933 | 1.008833 | 0.331973 | 3.0389   | 0.003037 | 0.065125 | 1 |
| ENSG0000 | remission | Inflamed | CTB-114C7 | lincRNA    | chr5  | 1.7E+08  | 1.7E+08  | - | 2182  | 10.54177 | 0.21957  | -1.17893 | 0.388016 | -3.03834 | 0.003042 | 0.065129 | 1 |
| ENSG0000 | remission | Inflamed | SRD5A3    | protein_cc | chr4  | 56212276 | 56239263 | + | 4420  | 1092.329 | 0        | -0.72265 | 0.237843 | -3.03834 | 0.003042 | 0.065129 | 1 |
| ENSG0000 | remission | Inflamed | SMIM14    | protein_cc | chr4  | 39547950 | 39640710 | - | 6721  | 3891.99  | 0        | 0.694744 | 0.228731 | 3.037384 | 0.003051 | 0.065266 | 1 |
| ENSG0000 | remission | Inflamed | FGFR2     | protein_cc | chr10 | 1.23E+08 | 1.23E+08 | - | 7543  | 1615.912 | 0        | 1.109086 | 0.365212 | 3.03683  | 0.003056 | 0.065322 | 1 |
| ENSG0000 | remission | Inflamed | GRIN3B    | protein_cc | chr19 | 1000418  | 1009731  | + | 3281  | 4.465394 | 0.267303 | -0.75508 | 0.248744 | -3.03557 | 0.003068 | 0.065495 | 1 |
| ENSG0000 | remission | Inflamed | PRG4      | protein_cc | chr1  | 1.86E+08 | 1.86E+08 | + | 5050  | 6.859189 | 0.348449 | -0.97502 | 0.321215 | -3.03542 | 0.003069 | 0.065495 | 1 |
| ENSG0000 | remission | Inflamed | RP11-757C | lincRNA    | chr18 | 14244624 | 14252139 | + | 566   | 3.353222 | 0.374702 | 0.747459 | 0.246394 | 3.033587 | 0.003086 | 0.065799 | 1 |
| ENSG0000 | remission | Inflamed | ARHGDIB   | protein_cc | chr12 | 15094951 | 15114662 | - | 2102  | 4927.458 | 0        | -0.74651 | 0.246102 | -3.03332 | 0.003089 | 0.065799 | 1 |
| ENSG0000 | remission | Inflamed | RP11-277E | antisense  | chr1  | 1.67E+08 | 1.67E+08 | - | 682   | 11.15274 | 0.0358   | 0.707945 | 0.233407 | 3.033089 | 0.003091 | 0.065799 | 1 |
| ENSG0000 | remission | Inflamed | CCDC69    | protein_cc | chr5  | 1.51E+08 | 1.51E+08 | - | 4993  | 3479.79  | 0        | -0.80856 | 0.266608 | -3.03278 | 0.003094 | 0.065808 | 1 |
| ENSG0000 | remission | Inflamed | SIAH3     | protein_cc | chr13 | 46354405 | 46425871 | - | 4030  | 4.293556 | 0.353222 | 0.907505 | 0.299398 | 3.031101 | 0.00311  | 0.065995 | 1 |
| ENSG0000 | remission | Inflamed | MEI1      | protein_cc | chr22 | 42095503 | 42195460 | + | 5412  | 619.0644 | 0        | -1.03875 | 0.342719 | -3.03091 | 0.003111 | 0.065995 | 1 |
| ENSG0000 | remission | Inflamed | FAM89B    | protein_cc | chr11 | 65339820 | 65341669 | + | 1458  | 478.0358 | 0        | -0.4846  | 0.159899 | -3.03064 | 0.003114 | 0.065995 | 1 |

|          |           |          |           |                |       |          |          |   |       |          |          |          |          |          |          |          |   |
|----------|-----------|----------|-----------|----------------|-------|----------|----------|---|-------|----------|----------|----------|----------|----------|----------|----------|---|
| ENSG0000 | remission | Inflamed | IGKV1-17  | IG_V_gene      | chr2  | 89416833 | 89417335 | - | 378   | 8348.06  | 0        | -1.56301 | 0.515764 | -3.03047 | 0.003116 | 0.065995 | 1 |
| ENSG0000 | remission | Inflamed | SAMD14    | protein_cc     | chr17 | 48187404 | 48207246 | - | 7016  | 214.5346 | 0        | -0.77913 | 0.257098 | -3.03046 | 0.003116 | 0.065995 | 1 |
| ENSG0000 | remission | Inflamed | EFCAB4B   | protein_cc     | chr12 | 3715799  | 3873985  | - | 12466 | 1770.432 | 0        | 0.841858 | 0.277832 | 3.030092 | 0.003119 | 0.065995 | 1 |
| ENSG0000 | remission | Inflamed | CCL25     | protein_cc     | chr19 | 8117651  | 8127534  | + | 984   | 168.1193 | 0.176611 | -1.52426 | 0.503118 | -3.02963 | 0.003124 | 0.065995 | 1 |
| ENSG0000 | remission | Inflamed | NEB       | protein_cc     | chr2  | 1.52E+08 | 1.53E+08 | - | 30567 | 23.30072 | 0.040573 | -1.10069 | 0.363313 | -3.0296  | 0.003124 | 0.065995 | 1 |
| ENSG0000 | remission | Inflamed | PRR26     | protein_cc     | chr10 | 695888   | 711109   | + | 4833  | 288.8305 | 0        | 0.785657 | 0.259346 | 3.029375 | 0.003126 | 0.065995 | 1 |
| ENSG0000 | remission | Inflamed | IGHG3     | IG_C_gene      | chr14 | 1.06E+08 | 1.06E+08 | - | 1268  | 109430.7 | 0        | -2.22797 | 0.735502 | -3.02918 | 0.003128 | 0.065995 | 1 |
| ENSG0000 | remission | Inflamed | RP11-357C | processed_chrx |       | 62563106 | 62780951 | - | 6379  | 911.5537 | 0        | 0.445438 | 0.147077 | 3.028612 | 0.003133 | 0.066055 | 1 |
| ENSG0000 | remission | Inflamed | OPHN1     | protein_cc     | chrX  | 67262186 | 67653755 | - | 8224  | 366.5012 | 0        | 0.720978 | 0.238125 | 3.027734 | 0.003142 | 0.066129 | 1 |
| ENSG0000 | remission | Inflamed | SEC61B    | protein_cc     | chr9  | 1.02E+08 | 1.02E+08 | + | 1190  | 2348.325 | 0        | -0.54121 | 0.178753 | -3.02771 | 0.003142 | 0.066129 | 1 |
| ENSG0000 | remission | Inflamed | NTPCR     | protein_cc     | chr1  | 2.33E+08 | 2.33E+08 | + | 15854 | 1093.649 | 0        | 0.321585 | 0.106229 | 3.027285 | 0.003146 | 0.066162 | 1 |
| ENSG0000 | remission | Inflamed | CYTH4     | protein_cc     | chr22 | 37678068 | 37711382 | + | 6157  | 2259.122 | 0        | -0.86779 | 0.286712 | -3.02669 | 0.003151 | 0.066229 | 1 |
| ENSG0000 | remission | Inflamed | RP11-326C | lincRNA        | chr11 | 325703   | 326294   | - | 592   | 2.615752 | 0.505967 | -0.7429  | 0.245535 | -3.02564 | 0.003161 | 0.066355 | 1 |
| ENSG0000 | remission | Inflamed | GNGT2     | protein_cc     | chr17 | 47280153 | 47287936 | - | 1689  | 97.24821 | 0        | -0.55265 | 0.182661 | -3.02553 | 0.003163 | 0.066355 | 1 |
| ENSG0000 | remission | Inflamed | FUZ       | protein_cc     | chr19 | 50310126 | 50320633 | - | 2951  | 292.4129 | 0        | -0.4548  | 0.150359 | -3.02477 | 0.00317  | 0.066454 | 1 |
| ENSG0000 | remission | Inflamed | OAZ2      | protein_cc     | chr15 | 64979772 | 64995480 | - | 7671  | 2405.107 | 0        | -0.39357 | 0.130127 | -3.02448 | 0.003173 | 0.06646  | 1 |
| ENSG0000 | remission | Inflamed | NOL4      | protein_cc     | chr18 | 31431064 | 31804916 | - | 5687  | 12.04057 | 0.138425 | 1.183092 | 0.391464 | 3.022226 | 0.003194 | 0.066734 | 1 |
| ENSG0000 | remission | Inflamed | EMILIN2   | protein_cc     | chr18 | 2847028  | 2915991  | + | 6435  | 1562.117 | 0        | -0.70769 | 0.234171 | -3.02212 | 0.003195 | 0.066734 | 1 |
| ENSG0000 | remission | Inflamed | RP11-626F | lincRNA        | chr14 | 27278623 | 27305664 | + | 853   | 2.221957 | 0.687351 | 0.581281 | 0.192343 | 3.022108 | 0.003195 | 0.066734 | 1 |
| ENSG0000 | remission | Inflamed | CTD-2124F | pseudoger      | chr5  | 37286551 | 37287079 | - | 529   | 11.60382 | 0.031026 | 0.641044 | 0.212121 | 3.022065 | 0.003196 | 0.066734 | 1 |
| ENSG0000 | remission | Inflamed | RP11-234E | lincRNA        | chr12 | 4809583  | 4829268  | - | 1249  | 523.2458 | 0.00716  | 1.065172 | 0.352526 | 3.021539 | 0.003201 | 0.066787 | 1 |
| ENSG0000 | remission | Inflamed | CTC-448F2 | pseudoger      | chr19 | 30528330 | 30529063 | + | 734   | 11.68496 | 0.064439 | 0.742813 | 0.245918 | 3.020572 | 0.00321  | 0.066915 | 1 |
| ENSG0000 | remission | Inflamed | MBOAT2    | protein_cc     | chr2  | 8992820  | 9143942  | - | 8798  | 1329.554 | 0        | 0.746387 | 0.247122 | 3.020321 | 0.003213 | 0.066915 | 1 |
| ENSG0000 | remission | Inflamed | IGLV1-47  | IG_V_gene      | chr22 | 22712087 | 22712608 | + | 407   | 7747.325 | 0        | -1.56153 | 0.517043 | -3.02012 | 0.003215 | 0.066915 | 1 |
| ENSG0000 | remission | Inflamed | RP11-126C | antisense      | chr17 | 202429   | 207372   | + | 748   | 41.83771 | 0.016706 | 0.903333 | 0.299185 | 3.019313 | 0.003222 | 0.067024 | 1 |
| ENSG0000 | remission | Inflamed | RP3-355L5 | lincRNA        | chr6  | 1.06E+08 | 1.06E+08 | - | 541   | 7.844869 | 0.047733 | 0.596022 | 0.19745  | 3.018591 | 0.003229 | 0.067117 | 1 |
| ENSG0000 | remission | Inflamed | UGT1A1    | protein_cc     | chr2  | 2.35E+08 | 2.35E+08 | + | 7982  | 304.0644 | 0.02864  | 1.435986 | 0.475819 | 3.017927 | 0.003236 | 0.067199 | 1 |
| ENSG0000 | remission | Inflamed | SCNN1B    | protein_cc     | chr16 | 23289552 | 23392620 | + | 3918  | 3194.384 | 0        | 1.409437 | 0.467086 | 3.017509 | 0.00324  | 0.067231 | 1 |
| ENSG0000 | remission | Inflamed | AFG3L2    | protein_cc     | chr18 | 12328943 | 12377313 | - | 6624  | 3582.146 | 0        | 0.527467 | 0.174879 | 3.01619  | 0.003253 | 0.067381 | 1 |
| ENSG0000 | remission | Inflamed | PLEK      | protein_cc     | chr2  | 68592305 | 68624585 | + | 3314  | 3139.597 | 0        | -1.2548  | 0.416082 | -3.01575 | 0.003257 | 0.067381 | 1 |
| ENSG0000 | remission | Inflamed | CLSTN2    | protein_cc     | chr3  | 1.4E+08  | 1.4E+08  | + | 14596 | 194.8473 | 0.009547 | 1.075478 | 0.356638 | 3.015597 | 0.003259 | 0.067381 | 1 |
| ENSG0000 | remission | Inflamed | IGSF9     | protein_cc     | chr1  | 1.6E+08  | 1.6E+08  | - | 6620  | 2412.463 | 0        | 1.364906 | 0.452643 | 3.015411 | 0.003261 | 0.067381 | 1 |
| ENSG0000 | remission | Inflamed | DHRS13    | protein_cc     | chr17 | 27224799 | 27230089 | - | 2944  | 418.7947 | 0        | -0.39957 | 0.132511 | -3.01534 | 0.003261 | 0.067381 | 1 |
| ENSG0000 | remission | Inflamed | IL23R     | protein_cc     | chr1  | 67632083 | 67725662 | + | 2995  | 36.15274 | 0.002387 | 0.798435 | 0.264803 | 3.015205 | 0.003263 | 0.067381 | 1 |
| ENSG0000 | remission | Inflamed | PEA15     | protein_cc     | chr1  | 1.6E+08  | 1.6E+08  | + | 2806  | 4515.518 | 0        | -0.57442 | 0.190578 | -3.0141  | 0.003274 | 0.067552 | 1 |
| ENSG0000 | remission | Inflamed | KIAA0319  | protein_cc     | chr6  | 24544332 | 24646383 | - | 7005  | 101.7852 | 0.009547 | 0.941774 | 0.312521 | 3.013477 | 0.00328  | 0.067626 | 1 |
| ENSG0000 | remission | Inflamed | MT-TV     | Mt_tRNA        | chrM  | 1602     | 1670     | + | 69    | 246      | 0.002387 | 1.257654 | 0.417414 | 3.012966 | 0.003285 | 0.067678 | 1 |
| ENSG0000 | remission | Inflamed | FAM160A2  | protein_cc     | chr11 | 6232565  | 6255941  | - | 4736  | 5210.124 | 0        | 0.570352 | 0.189427 | 3.010927 | 0.003305 | 0.068041 | 1 |
| ENSG0000 | remission | Inflamed | CTD-2350C | antisense      | chr17 | 26729128 | 26731067 | + | 1940  | 35.71599 | 0.02148  | 0.748145 | 0.248504 | 3.010591 | 0.003308 | 0.068057 | 1 |
| ENSG0000 | remission | Inflamed | WNT11     | protein_cc     | chr11 | 75897369 | 75921780 | - | 2401  | 70.54893 | 0.002387 | 1.085982 | 0.360843 | 3.009568 | 0.003319 | 0.068214 | 1 |

|          |           |          |           |                  |          |          |   |       |          |          |          |          |          |          |          |   |
|----------|-----------|----------|-----------|------------------|----------|----------|---|-------|----------|----------|----------|----------|----------|----------|----------|---|
| ENSG0000 | remission | Inflamed | SELM      | protein_cc chr22 | 31500758 | 31516055 | - | 3187  | 1417.453 | 0        | -0.75511 | 0.250956 | -3.00894 | 0.003325 | 0.068225 | 1 |
| ENSG0000 | remission | Inflamed | MARCO     | protein_cc chr2  | 1.2E+08  | 1.2E+08  | + | 2079  | 45.34845 | 0.124105 | -1.68505 | 0.560025 | -3.00888 | 0.003325 | 0.068225 | 1 |
| ENSG0000 | remission | Inflamed | TMEM184   | protein_cc chr22 | 38615298 | 38669040 | - | 5014  | 4251.387 | 0        | -0.41083 | 0.136545 | -3.00874 | 0.003327 | 0.068225 | 1 |
| ENSG0000 | remission | Inflamed | DNAH6     | protein_cc chr2  | 84743579 | 85046713 | + | 13514 | 24.80907 | 0.02148  | 0.873367 | 0.290316 | 3.008329 | 0.003331 | 0.068235 | 1 |
| ENSG0000 | remission | Inflamed | HPX       | protein_cc chr11 | 6452279  | 6463847  | - | 3631  | 58.3031  | 0.00716  | 0.902303 | 0.299951 | 3.008167 | 0.003333 | 0.068235 | 1 |
| ENSG0000 | remission | Inflamed | RP11-134F | lincRNA chr1     | 2.03E+08 | 2.03E+08 | + | 837   | 7.548926 | 0.124105 | -0.821   | 0.272988 | -3.00747 | 0.00334  | 0.068325 | 1 |
| ENSG0000 | remission | Inflamed | AC093323  | protein_cc chr4  | 6693782  | 6694189  | - | 408   | 1.699284 | 0.544153 | 0.531502 | 0.176767 | 3.0068   | 0.003346 | 0.068402 | 1 |
| ENSG0000 | remission | Inflamed | AC008984  | pseudoger chr19  | 54813047 | 54817309 | - | 404   | 2.515513 | 0.682578 | -0.87584 | 0.291306 | -3.00658 | 0.003349 | 0.068402 | 1 |
| ENSG0000 | remission | Inflamed | ALS2CR12  | protein_cc chr2  | 2.02E+08 | 2.02E+08 | - | 2635  | 13.73986 | 0.071599 | 0.792484 | 0.263626 | 3.006098 | 0.003353 | 0.068448 | 1 |
| ENSG0000 | remission | Inflamed | TMCC3     | protein_cc chr12 | 94960900 | 95044338 | - | 6515  | 2564.26  | 0        | 0.825897 | 0.27479  | 3.005554 | 0.003359 | 0.068475 | 1 |
| ENSG0000 | remission | Inflamed | ACSM3     | protein_cc chr16 | 20621565 | 20808903 | + | 5095  | 610.1599 | 0        | 0.958266 | 0.318845 | 3.00543  | 0.00336  | 0.068475 | 1 |
| ENSG0000 | remission | Inflamed | MATN2     | protein_cc chr8  | 98881068 | 99048944 | + | 6938  | 3194.919 | 0        | 0.744391 | 0.247733 | 3.004813 | 0.003366 | 0.068475 | 1 |
| ENSG0000 | remission | Inflamed | NOX4      | protein_cc chr11 | 89057524 | 89322779 | - | 6327  | 18.32936 | 0.143198 | -1.16918 | 0.389108 | -3.00477 | 0.003367 | 0.068475 | 1 |
| ENSG0000 | remission | Inflamed | B9D1      | protein_cc chr17 | 19240867 | 19281495 | - | 3522  | 216.6563 | 0        | -0.58409 | 0.194394 | -3.00468 | 0.003368 | 0.068475 | 1 |
| ENSG0000 | remission | Inflamed | CHP2      | protein_cc chr16 | 23765948 | 23770272 | + | 2382  | 5338.893 | 0.004773 | 1.685562 | 0.561194 | 3.003526 | 0.003379 | 0.068557 | 1 |
| ENSG0000 | remission | Inflamed | SLA       | protein_cc chr8  | 1.34E+08 | 1.34E+08 | - | 7633  | 1209.224 | 0        | -0.88222 | 0.293741 | -3.0034  | 0.003381 | 0.068557 | 1 |
| ENSG0000 | remission | Inflamed | RN7SL812l | misc_RNA chr22   | 20836224 | 20836497 | - | 274   | 2.26253  | 0.443914 | 0.542163 | 0.180521 | 3.003328 | 0.003381 | 0.068557 | 1 |
| ENSG0000 | remission | Inflamed | AC097468  | antisense chr2   | 2.2E+08  | 2.2E+08  | + | 1992  | 11.62291 | 0.114558 | 0.988038 | 0.328989 | 3.003257 | 0.003382 | 0.068557 | 1 |
| ENSG0000 | remission | Inflamed | CHKA      | protein_cc chr11 | 67820326 | 67888911 | - | 3877  | 1539.971 | 0        | 0.591768 | 0.197084 | 3.002613 | 0.003389 | 0.068561 | 1 |
| ENSG0000 | remission | Inflamed | CTHRC1    | protein_cc chr8  | 1.04E+08 | 1.04E+08 | + | 1776  | 311.5752 | 0        | -1.40098 | 0.466615 | -3.00243 | 0.003391 | 0.068561 | 1 |
| ENSG0000 | remission | Inflamed | MTND4P1   | pseudoger chr5   | 1.34E+08 | 1.34E+08 | - | 1377  | 1433.26  | 0        | 0.603867 | 0.201138 | 3.002247 | 0.003393 | 0.068561 | 1 |
| ENSG0000 | remission | Inflamed | HLA-DQA1  | protein_cc chr6  | 32595956 | 32614839 | + | 6927  | 3690.16  | 0        | -0.77001 | 0.256553 | -3.00138 | 0.003401 | 0.068561 | 1 |
| ENSG0000 | remission | Inflamed | CNTNAP2   | protein_cc chr7  | 1.46E+08 | 1.48E+08 | + | 10308 | 202.5704 | 0        | 0.935823 | 0.31182  | 3.001167 | 0.003404 | 0.068561 | 1 |
| ENSG0000 | remission | Inflamed | TAS2R38   | protein_cc chr7  | 1.42E+08 | 1.42E+08 | - | 1143  | 3.011933 | 0.529833 | 0.745339 | 0.248356 | 3.001096 | 0.003404 | 0.068561 | 1 |
| ENSG0000 | remission | Inflamed | RP5-1057J | lincRNA chr1     | 23704873 | 23705522 | - | 650   | 25.24105 | 0.026253 | 0.864934 | 0.288209 | 3.00106  | 0.003405 | 0.068561 | 1 |
| ENSG0000 | remission | Inflamed | PIWIL2    | protein_cc chr8  | 22132810 | 22215076 | + | 5751  | 68.91647 | 0.002387 | 0.838095 | 0.279285 | 3.00086  | 0.003407 | 0.068561 | 1 |
| ENSG0000 | remission | Inflamed | S1PR4     | protein_cc chr19 | 3172344  | 3180329  | + | 1693  | 348.3938 | 0        | -1.12777 | 0.375822 | -3.0008  | 0.003407 | 0.068561 | 1 |
| ENSG0000 | remission | Inflamed | ATXN7L1   | protein_cc chr7  | 1.05E+08 | 1.06E+08 | - | 8295  | 422.4296 | 0        | 0.456053 | 0.151983 | 3.000682 | 0.003409 | 0.068561 | 1 |
| ENSG0000 | remission | Inflamed | SLC1A4    | protein_cc chr2  | 65215611 | 65250999 | + | 6939  | 2935.217 | 0        | -0.60022 | 0.200102 | -2.99958 | 0.00342  | 0.068701 | 1 |
| ENSG0000 | remission | Inflamed | MAGI1     | protein_cc chr3  | 65339200 | 66024509 | - | 11647 | 1226.033 | 0        | 0.744629 | 0.248251 | 2.999497 | 0.003421 | 0.068701 | 1 |
| ENSG0000 | remission | Inflamed | B3GALT1   | protein_cc chr2  | 1.69E+08 | 1.69E+08 | + | 5353  | 359.3294 | 0.009547 | 1.624244 | 0.541581 | 2.999077 | 0.003425 | 0.068735 | 1 |
| ENSG0000 | remission | Inflamed | MICB      | protein_cc chr6  | 31462658 | 31478901 | + | 2854  | 334.9141 | 0        | -0.63667 | 0.212328 | -2.99853 | 0.003431 | 0.068797 | 1 |
| ENSG0000 | remission | Inflamed | ADAM1A    | pseudoger chr12  | 1.12E+08 | 1.12E+08 | + | 2976  | 267.3604 | 0        | 1.08198  | 0.360952 | 2.997574 | 0.00344  | 0.068832 | 1 |
| ENSG0000 | remission | Inflamed | RP5-1148f | antisense chr6   | 64280910 | 64282313 | - | 1404  | 127.3222 | 0        | 0.74422  | 0.248283 | 2.997461 | 0.003442 | 0.068832 | 1 |
| ENSG0000 | remission | Inflamed | GYG1      | protein_cc chr3  | 1.49E+08 | 1.49E+08 | + | 3475  | 1042.988 | 0        | -0.43042 | 0.143599 | -2.99738 | 0.003442 | 0.068832 | 1 |
| ENSG0000 | remission | Inflamed | PANK1     | protein_cc chr10 | 91342745 | 91405215 | - | 4127  | 726.0907 | 0        | 0.882289 | 0.294374 | 2.997167 | 0.003445 | 0.068832 | 1 |
| ENSG0000 | remission | Inflamed | RP11-77K1 | sense_intr chr16 | 75492150 | 75493915 | - | 852   | 6.460621 | 0.205251 | 0.781692 | 0.260826 | 2.996987 | 0.003447 | 0.068832 | 1 |
| ENSG0000 | remission | Inflamed | GSTP1     | protein_cc chr11 | 67351066 | 67354131 | + | 1925  | 8214.43  | 0        | -0.47105 | 0.157183 | -2.99679 | 0.003449 | 0.068832 | 1 |
| ENSG0000 | remission | Inflamed | CHMP3     | protein_cc chr2  | 86730554 | 86948245 | - | 7393  | 2758.845 | 0        | 0.577156 | 0.192633 | 2.996142 | 0.003455 | 0.068832 | 1 |
| ENSG0000 | remission | Inflamed | QPCTL     | protein_cc chr19 | 46195741 | 46207247 | + | 2396  | 569.6802 | 0        | -0.44304 | 0.147871 | -2.99612 | 0.003456 | 0.068832 | 1 |

|          |           |          |           |               |       |          |          |   |      |          |          |          |          |          |          |          |   |
|----------|-----------|----------|-----------|---------------|-------|----------|----------|---|------|----------|----------|----------|----------|----------|----------|----------|---|
| ENSG0000 | remission | Inflamed | DHH       | protein_cc    | chr12 | 49483204 | 49488602 | - | 1936 | 19.64916 | 0.045346 | -0.91783 | 0.306345 | -2.99607 | 0.003456 | 0.068832 | 1 |
| ENSG0000 | remission | Inflamed | RP11-415C | lincRNA       | chr4  | 27219101 | 27283847 | + | 2802 | 1.145585 | 0.75895  | 0.418564 | 0.139733 | 2.995457 | 0.003462 | 0.068908 | 1 |
| ENSG0000 | remission | Inflamed | ZNF57     | protein_cc    | chr19 | 2900896  | 2918474  | + | 2258 | 285.1122 | 0        | 0.728919 | 0.24345  | 2.994121 | 0.003476 | 0.069008 | 1 |
| ENSG0000 | remission | Inflamed | WFIKKN1   | protein_cc    | chr16 | 679239   | 684116   | + | 4878 | 79.0358  | 0.00716  | 0.867311 | 0.289687 | 2.993958 | 0.003478 | 0.069008 | 1 |
| ENSG0000 | remission | Inflamed | NDUFA4L2  | protein_cc    | chr12 | 57628686 | 57634498 | - | 2806 | 287.1527 | 0        | -1.06427 | 0.355478 | -2.99391 | 0.003479 | 0.069008 | 1 |
| ENSG0000 | remission | Inflamed | SLAMF9    | protein_cc    | chr1  | 1.6E+08  | 1.6E+08  | - | 1156 | 5.673031 | 0.403341 | -0.96789 | 0.323328 | -2.99351 | 0.003483 | 0.069008 | 1 |
| ENSG0000 | remission | Inflamed | GPD1L     | protein_cc    | chr3  | 32147181 | 32210205 | + | 4802 | 2890.601 | 0        | 0.859714 | 0.287196 | 2.993472 | 0.003483 | 0.069008 | 1 |
| ENSG0000 | remission | Inflamed | RBFADN    | processed_chr | 18    | 77806900 | 77853362 | + | 6623 | 27.64916 | 0.023866 | 0.863155 | 0.288353 | 2.993398 | 0.003484 | 0.069008 | 1 |
| ENSG0000 | remission | Inflamed | FAM20A    | protein_cc    | chr17 | 66531254 | 66597530 | - | 6203 | 504.2124 | 0        | -1.17696 | 0.393209 | -2.99322 | 0.003486 | 0.069008 | 1 |
| ENSG0000 | remission | Inflamed | NDRG2     | protein_cc    | chr14 | 21484922 | 21539031 | - | 7550 | 4164.998 | 0        | 0.681986 | 0.227881 | 2.992732 | 0.003491 | 0.069056 | 1 |
| ENSG0000 | remission | Inflamed | AC012146  | processed_chr | 17    | 5014763  | 5017674  | + | 856  | 41.2506  | 0        | -0.68035 | 0.227429 | -2.99147 | 0.003504 | 0.069244 | 1 |
| ENSG0000 | remission | Inflamed | MTX1      | protein_cc    | chr1  | 1.55E+08 | 1.55E+08 | + | 3278 | 524.5227 | 0        | -0.29246 | 0.09777  | -2.99132 | 0.003506 | 0.069244 | 1 |
| ENSG0000 | remission | Inflamed | WARS      | protein_cc    | chr14 | 1.01E+08 | 1.01E+08 | - | 6358 | 13094.11 | 0        | -0.79269 | 0.265202 | -2.98902 | 0.00353  | 0.069658 | 1 |
| ENSG0000 | remission | Inflamed | PGAP3     | protein_cc    | chr17 | 37827375 | 37853050 | - | 3669 | 2334.819 | 0        | 0.583838 | 0.19534  | 2.988835 | 0.003532 | 0.069658 | 1 |
| ENSG0000 | remission | Inflamed | ENG       | protein_cc    | chr9  | 1.31E+08 | 1.31E+08 | - | 3710 | 6547.759 | 0        | -0.88014 | 0.294592 | -2.98766 | 0.003544 | 0.069852 | 1 |
| ENSG0000 | remission | Inflamed | IGKV1-33  | IG_V_gene     | chr2  | 89567758 | 89568263 | - | 382  | 371.1146 | 0.002387 | -1.44916 | 0.485196 | -2.98675 | 0.003554 | 0.06999  | 1 |
| ENSG0000 | remission | Inflamed | RAVER2    | protein_cc    | chr1  | 65210778 | 65298915 | + | 6070 | 2021.63  | 0        | 0.86344  | 0.289122 | 2.986417 | 0.003558 | 0.070005 | 1 |
| ENSG0000 | remission | Inflamed | RNU6-113  | snRNA         | chr7  | 1.02E+08 | 1.02E+08 | + | 104  | 0.816229 | 0.785203 | 0.40554  | 0.135806 | 2.986178 | 0.00356  | 0.070005 | 1 |
| ENSG0000 | remission | Inflamed | AC090954  | pseudoger     | chr3  | 15173355 | 15173715 | - | 361  | 4.28401  | 0.353222 | 0.772093 | 0.258622 | 2.985414 | 0.003568 | 0.070113 | 1 |
| ENSG0000 | remission | Inflamed | ZNF774    | protein_cc    | chr15 | 90895477 | 90909324 | + | 5457 | 271.5513 | 0        | 0.817142 | 0.273762 | 2.984865 | 0.003574 | 0.070164 | 1 |
| ENSG0000 | remission | Inflamed | P4HB      | protein_cc    | chr17 | 79801035 | 79818570 | - | 5303 | 50454    | 0        | -0.33405 | 0.111923 | -2.98467 | 0.003576 | 0.070164 | 1 |
| ENSG0000 | remission | Inflamed | FAM89A    | protein_cc    | chr1  | 2.31E+08 | 2.31E+08 | - | 2394 | 120.9284 | 0        | -0.68815 | 0.230705 | -2.98282 | 0.003596 | 0.070501 | 1 |
| ENSG0000 | remission | Inflamed | LA16c-380 | lincRNA       | chr16 | 3056121  | 3057386  | + | 1266 | 173.2721 | 0        | 0.719557 | 0.241256 | 2.982542 | 0.003599 | 0.070508 | 1 |
| ENSG0000 | remission | Inflamed | RP11-572C | lincRNA       | chr3  | 48709888 | 48710166 | + | 279  | 1.031026 | 0.73747  | 0.418025 | 0.140193 | 2.981775 | 0.003607 | 0.070567 | 1 |
| ENSG0000 | remission | Inflamed | SPON1     | processed_chr | 11    | 13983914 | 14289646 | + | 5639 | 4792.737 | 0        | 0.810628 | 0.271862 | 2.981764 | 0.003608 | 0.070567 | 1 |
| ENSG0000 | remission | Inflamed | XXbac-B46 | processed_chr | 22    | 18270418 | 18294263 | - | 4328 | 12.36277 | 0.090692 | 0.838184 | 0.281176 | 2.980994 | 0.003616 | 0.070657 | 1 |
| ENSG0000 | remission | Inflamed | IGKV1D-27 | IG_V_pseu     | chr2  | 90007677 | 90008154 | + | 354  | 261.7733 | 0.002387 | -1.37753 | 0.46224  | -2.98012 | 0.003625 | 0.070657 | 1 |
| ENSG0000 | remission | Inflamed | RP11-274E | lincRNA       | chr9  | 71158457 | 71161505 | - | 526  | 6.75179  | 0.379475 | -1.12532 | 0.37767  | -2.97964 | 0.003631 | 0.070657 | 1 |
| ENSG0000 | remission | Inflamed | RP11-383I | lincRNA       | chr3  | 99521543 | 99524902 | - | 3360 | 4.706444 | 0.260143 | 0.73067  | 0.245232 | 2.979503 | 0.003632 | 0.070657 | 1 |
| ENSG0000 | remission | Inflamed | SLC25A23  | protein_cc    | chr19 | 6436090  | 6465214  | - | 4859 | 6772.198 | 0        | 0.696798 | 0.233871 | 2.979415 | 0.003633 | 0.070657 | 1 |
| ENSG0000 | remission | Inflamed | LINC00582 | antisense     | chr1  | 2.32E+08 | 2.32E+08 | - | 597  | 24.93079 | 0.016706 | -0.99715 | 0.334703 | -2.97921 | 0.003635 | 0.070657 | 1 |
| ENSG0000 | remission | Inflamed | AIF1      | protein_cc    | chr6  | 31582961 | 31584798 | + | 1276 | 1017.535 | 0        | -0.72356 | 0.242874 | -2.97916 | 0.003636 | 0.070657 | 1 |
| ENSG0000 | remission | Inflamed | HERPUD1   | protein_cc    | chr16 | 56965960 | 56977798 | + | 4178 | 11964.32 | 0        | -0.47791 | 0.160418 | -2.97914 | 0.003636 | 0.070657 | 1 |
| ENSG0000 | remission | Inflamed | UGT1A7    | protein_cc    | chr2  | 2.35E+08 | 2.35E+08 | + | 4167 | 5.799523 | 0.324582 | 0.808683 | 0.271451 | 2.979107 | 0.003636 | 0.070657 | 1 |
| ENSG0000 | remission | Inflamed | AC096579  | processed_chr | 2     | 89109984 | 89161075 | - | 1653 | 54.45107 | 0.009547 | -1.07024 | 0.359295 | -2.97874 | 0.00364  | 0.070683 | 1 |
| ENSG0000 | remission | Inflamed | CTD-2583f | antisense     | chr16 | 12853139 | 12855019 | + | 927  | 2.787589 | 0.463007 | -0.72504 | 0.24349  | -2.97772 | 0.003651 | 0.070781 | 1 |
| ENSG0000 | remission | Inflamed | RP11-677f | antisense     | chr11 | 1.25E+08 | 1.25E+08 | + | 1538 | 49.36038 | 0        | 0.841314 | 0.282545 | 2.977622 | 0.003653 | 0.070781 | 1 |
| ENSG0000 | remission | Inflamed | IGHV6-1   | IG_V_gene     | chr14 | 1.06E+08 | 1.06E+08 | - | 415  | 3655.678 | 0        | -1.51801 | 0.50982  | -2.97753 | 0.003653 | 0.070781 | 1 |
| ENSG0000 | remission | Inflamed | MTATP6P1  | pseudoger     | chr1  | 569076   | 569756   | + | 681  | 1792.938 | 0        | 0.617915 | 0.207546 | 2.977249 | 0.003657 | 0.070789 | 1 |
| ENSG0000 | remission | Inflamed | SPG21     | protein_cc    | chr15 | 65255362 | 65282648 | - | 3984 | 2180.816 | 0        | -0.26616 | 0.089413 | -2.97673 | 0.003662 | 0.070797 | 1 |

|          |           |          |           |                  |          |          |   |  |       |          |          |          |          |          |          |          |   |
|----------|-----------|----------|-----------|------------------|----------|----------|---|--|-------|----------|----------|----------|----------|----------|----------|----------|---|
| ENSG0000 | remission | Inflamed | IMPA2     | protein_cc chr18 | 11981024 | 12030876 | + |  | 3819  | 2241.069 | 0        | 0.480681 | 0.16148  | 2.976723 | 0.003662 | 0.070797 | 1 |
| ENSG0000 | remission | Inflamed | PCSK6     | protein_cc chr15 | 1.02E+08 | 1.02E+08 | - |  | 9348  | 2759.527 | 0        | 0.758527 | 0.254952 | 2.975179 | 0.003679 | 0.071056 | 1 |
| ENSG0000 | remission | Inflamed | NAGLU     | protein_cc chr17 | 40688190 | 40696467 | + |  | 3004  | 2033.63  | 0        | -0.30393 | 0.102163 | -2.97501 | 0.003681 | 0.071056 | 1 |
| ENSG0000 | remission | Inflamed | C3orf55   | protein_cc chr3  | 1.57E+08 | 1.57E+08 | + |  | 3180  | 16.84964 | 0.057279 | -1.14517 | 0.38521  | -2.97286 | 0.003705 | 0.071373 | 1 |
| ENSG0000 | remission | Inflamed | CAMK1G    | protein_cc chr1  | 2.1E+08  | 2.1E+08  | + |  | 2676  | 19.42243 | 0.128878 | -1.11616 | 0.375459 | -2.9728  | 0.003706 | 0.071373 | 1 |
| ENSG0000 | remission | Inflamed | POU5F1    | protein_cc chr6  | 31132119 | 31148508 | - |  | 2876  | 180.0549 | 0        | 1.074544 | 0.361461 | 2.97278  | 0.003706 | 0.071373 | 1 |
| ENSG0000 | remission | Inflamed | PCBP3     | protein_cc chr21 | 47063608 | 47362368 | + |  | 6796  | 223.2792 | 0        | -0.97614 | 0.328405 | -2.97237 | 0.00371  | 0.071409 | 1 |
| ENSG0000 | remission | Inflamed | ELL3      | protein_cc chr15 | 44064798 | 44069741 | - |  | 2880  | 59.11695 | 0.009547 | 0.896726 | 0.301751 | 2.971744 | 0.003717 | 0.071442 | 1 |
| ENSG0000 | remission | Inflamed | CCDC3     | protein_cc chr10 | 12938627 | 13141652 | - |  | 3681  | 826.0286 | 0        | -1.14269 | 0.384519 | -2.97172 | 0.003717 | 0.071442 | 1 |
| ENSG0000 | remission | Inflamed | THSD4     | protein_cc chr15 | 71389291 | 72075722 | + |  | 15803 | 1702.659 | 0        | 0.840036 | 0.282713 | 2.971337 | 0.003722 | 0.071472 | 1 |
| ENSG0000 | remission | Inflamed | EDN1      | protein_cc chr6  | 12290596 | 12297427 | + |  | 2033  | 484.8735 | 0        | 0.58921  | 0.198353 | 2.97051  | 0.003731 | 0.071596 | 1 |
| ENSG0000 | remission | Inflamed | PNOC      | protein_cc chr8  | 28174503 | 28200872 | + |  | 2126  | 246.0573 | 0        | -1.23165 | 0.414673 | -2.97018 | 0.003735 | 0.071616 | 1 |
| ENSG0000 | remission | Inflamed | RETSAT    | protein_cc chr2  | 85569211 | 85581743 | - |  | 4264  | 9232.317 | 0        | 0.684993 | 0.230676 | 2.969501 | 0.003742 | 0.071708 | 1 |
| ENSG0000 | remission | Inflamed | SMOC1     | protein_cc chr14 | 70320848 | 70499083 | + |  | 4369  | 369.2506 | 0        | -1.25789 | 0.423705 | -2.96879 | 0.00375  | 0.071808 | 1 |
| ENSG0000 | remission | Inflamed | RHBDL2    | protein_cc chr1  | 39351479 | 39407471 | - |  | 2914  | 752.3484 | 0        | 0.747828 | 0.252085 | 2.966575 | 0.003775 | 0.072231 | 1 |
| ENSG0000 | remission | Inflamed | C2        | protein_cc chr6  | 31865562 | 31913449 | + |  | 5536  | 1619.229 | 0        | -0.63808 | 0.215124 | -2.96609 | 0.00378  | 0.072283 | 1 |
| ENSG0000 | remission | Inflamed | THY1      | protein_cc chr11 | 1.19E+08 | 1.19E+08 | - |  | 5923  | 3910.936 | 0        | -1.04856 | 0.353674 | -2.96475 | 0.003796 | 0.072455 | 1 |
| ENSG0000 | remission | Inflamed | ANKRD26F  | pseudoger chr16  | 46503253 | 46603009 | - |  | 6411  | 1.675418 | 0.701671 | -0.7777  | 0.262315 | -2.96474 | 0.003796 | 0.072455 | 1 |
| ENSG0000 | remission | Inflamed | RP11-290F | lincRNA chr11    | 6223131  | 6224483  | - |  | 1353  | 111.401  | 0.00716  | 1.292243 | 0.435897 | 2.964564 | 0.003798 | 0.072455 | 1 |
| ENSG0000 | remission | Inflamed | C12orf68  | protein_cc chr12 | 48577366 | 48579709 | + |  | 2344  | 60.12649 | 0.004773 | -0.86862 | 0.293046 | -2.9641  | 0.003803 | 0.072503 | 1 |
| ENSG0000 | remission | Inflamed | LYN       | protein_cc chr8  | 56792372 | 56923940 | + |  | 3398  | 3092.625 | 0        | -0.74336 | 0.250849 | -2.96339 | 0.003811 | 0.072586 | 1 |
| ENSG0000 | remission | Inflamed | PHYH      | protein_cc chr10 | 13319796 | 13344412 | - |  | 3381  | 1220.198 | 0        | 0.517998 | 0.174809 | 2.96323  | 0.003813 | 0.072586 | 1 |
| ENSG0000 | remission | Inflamed | TNNT1     | protein_cc chr19 | 55644162 | 55660722 | - |  | 2171  | 11.6969  | 0.064439 | -0.81002 | 0.273434 | -2.9624  | 0.003822 | 0.072713 | 1 |
| ENSG0000 | remission | Inflamed | TCIRG1    | protein_cc chr11 | 67806483 | 67818362 | + |  | 4384  | 7170.379 | 0        | -0.49407 | 0.166813 | -2.96181 | 0.003829 | 0.072743 | 1 |
| ENSG0000 | remission | Inflamed | RP4-758J2 | lincRNA chr1     | 54492356 | 54494172 | - |  | 1817  | 107.6754 | 0        | 0.769101 | 0.259676 | 2.961777 | 0.003829 | 0.072743 | 1 |
| ENSG0000 | remission | Inflamed | CTC-510F1 | 3prime_ov chr19  | 11411453 | 11435117 | - |  | 685   | 8.334129 | 0.288783 | -1.10135 | 0.371895 | -2.96144 | 0.003833 | 0.072763 | 1 |
| ENSG0000 | remission | Inflamed | RP11-691I | protein_cc chr11 | 57509635 | 57560715 | + |  | 580   | 22.58473 | 0.102625 | 1.153063 | 0.389413 | 2.961028 | 0.003838 | 0.072775 | 1 |
| ENSG0000 | remission | Inflamed | P4HA3     | protein_cc chr11 | 73946846 | 74022702 | - |  | 4009  | 82.90215 | 0.00716  | -1.52058 | 0.513553 | -2.9609  | 0.003839 | 0.072775 | 1 |
| ENSG0000 | remission | Inflamed | PPP1R9A   | protein_cc chr7  | 94536514 | 94925727 | + |  | 11151 | 376.8258 | 0        | 0.957742 | 0.323517 | 2.960405 | 0.003845 | 0.07283  | 1 |
| ENSG0000 | remission | Inflamed | RP11-44F1 | lincRNA chr16    | 53420856 | 53422997 | + |  | 2142  | 50.00955 | 0.016706 | 0.924555 | 0.312337 | 2.960122 | 0.003848 | 0.072839 | 1 |
| ENSG0000 | remission | Inflamed | FJX1      | protein_cc chr11 | 35639735 | 35642419 | + |  | 2685  | 159.9045 | 0.00716  | -1.18427 | 0.400253 | -2.95879 | 0.003864 | 0.073023 | 1 |
| ENSG0000 | remission | Inflamed | IGKV3-15  | IG_V_gene chr2   | 89384673 | 89385283 | - |  | 442   | 10091.73 | 0        | -1.51972 | 0.513664 | -2.95859 | 0.003866 | 0.073023 | 1 |
| ENSG0000 | remission | Inflamed | CDH22     | protein_cc chr20 | 44802372 | 44937137 | - |  | 4929  | 14.4463  | 0.102625 | 1.119735 | 0.378475 | 2.958548 | 0.003866 | 0.073023 | 1 |
| ENSG0000 | remission | Inflamed | IGKV1D-39 | IG_V_gene chr2   | 89901292 | 89901791 | + |  | 376   | 967.7566 | 0        | -1.41565 | 0.478596 | -2.95792 | 0.003874 | 0.073097 | 1 |
| ENSG0000 | remission | Inflamed | CCL18     | protein_cc chr17 | 34391640 | 34399392 | + |  | 1397  | 1300.592 | 0        | -1.63988 | 0.554438 | -2.95773 | 0.003876 | 0.073097 | 1 |
| ENSG0000 | remission | Inflamed | IGKV1-39  | IG_V_gene chr2   | 89619383 | 89619904 | - |  | 398   | 726.0263 | 0        | -1.51755 | 0.513168 | -2.95722 | 0.003882 | 0.073155 | 1 |
| ENSG0000 | remission | Inflamed | CYP24A1   | protein_cc chr20 | 52769988 | 52790512 | - |  | 3972  | 77.91647 | 0.217184 | -1.78955 | 0.605258 | -2.95667 | 0.003888 | 0.073223 | 1 |
| ENSG0000 | remission | Inflamed | TBXAS1    | protein_cc chr7  | 1.39E+08 | 1.4E+08  | + |  | 6271  | 1252.377 | 0        | -0.58561 | 0.198092 | -2.95626 | 0.003893 | 0.07326  | 1 |
| ENSG0000 | remission | Inflamed | IL11      | protein_cc chr19 | 55875757 | 55881831 | - |  | 2671  | 880.7542 | 0.002387 | -2.29058 | 0.775025 | -2.9555  | 0.003902 | 0.073373 | 1 |
| ENSG0000 | remission | Inflamed | RP11-432I | lincRNA chr16    | 71760878 | 71761895 | + |  | 1018  | 0.97852  | 0.768496 | 0.399194 | 0.135095 | 2.954917 | 0.003908 | 0.073447 | 1 |

|          |           |          |           |                  |          |          |   |       |          |          |          |          |          |          |          |   |
|----------|-----------|----------|-----------|------------------|----------|----------|---|-------|----------|----------|----------|----------|----------|----------|----------|---|
| ENSG0000 | remission | Inflamed | EMP3      | protein_cc chr19 | 48824766 | 48833810 | + | 1667  | 1196.217 | 0        | -0.89034 | 0.301393 | -2.95409 | 0.003918 | 0.073576 | 1 |
| ENSG0000 | remission | Inflamed | CLEC4F    | protein_cc chr2  | 71035775 | 71047732 | - | 2475  | 29.57279 | 0.042959 | 1.104795 | 0.374051 | 2.953597 | 0.003924 | 0.073627 | 1 |
| ENSG0000 | remission | Inflamed | GMPPB     | protein_cc chr3  | 49754277 | 49761384 | - | 6742  | 534.6396 | 0        | -0.39919 | 0.135164 | -2.95338 | 0.003926 | 0.073627 | 1 |
| ENSG0000 | remission | Inflamed | RP11-404F | antisense chr14  | 96725748 | 96734961 | - | 738   | 1.427208 | 0.696897 | 0.450937 | 0.152734 | 2.952434 | 0.003937 | 0.073781 | 1 |
| ENSG0000 | remission | Inflamed | UBE2E2    | protein_cc chr3  | 23244511 | 23633284 | + | 3272  | 265.0477 | 0        | -0.6293  | 0.213208 | -2.95158 | 0.003947 | 0.073798 | 1 |
| ENSG0000 | remission | Inflamed | RP11-1151 | antisense chr18  | 56202647 | 56205784 | + | 2553  | 11.7852  | 0.069212 | 0.749204 | 0.253877 | 2.951053 | 0.003954 | 0.073798 | 1 |
| ENSG0000 | remission | Inflamed | USP30-AS1 | antisense chr12  | 1.09E+08 | 1.09E+08 | - | 656   | 108.3222 | 0        | -0.61664 | 0.208968 | -2.95086 | 0.003956 | 0.073798 | 1 |
| ENSG0000 | remission | Inflamed | RP11-503E | antisense chr8   | 42392672 | 42393447 | - | 708   | 22.03341 | 0.093079 | 1.120024 | 0.379598 | 2.950551 | 0.00396  | 0.073798 | 1 |
| ENSG0000 | remission | Inflamed | CD274     | protein_cc chr9  | 5450503  | 5470566  | + | 4108  | 542.1169 | 0        | -1.19414 | 0.40476  | -2.95025 | 0.003963 | 0.073798 | 1 |
| ENSG0000 | remission | Inflamed | MTMR8     | protein_cc chrX  | 63444187 | 63615333 | - | 3813  | 63.94749 | 0.004773 | 0.724403 | 0.245544 | 2.950201 | 0.003964 | 0.073798 | 1 |
| ENSG0000 | remission | Inflamed | AKR1B1    | protein_cc chr7  | 1.34E+08 | 1.34E+08 | - | 3660  | 1581.53  | 0        | -0.76034 | 0.257731 | -2.95015 | 0.003964 | 0.073798 | 1 |
| ENSG0000 | remission | Inflamed | TNFAIP8L2 | protein_cc chr1  | 1.51E+08 | 1.51E+08 | + | 1178  | 208.6778 | 0        | -0.66129 | 0.224159 | -2.9501  | 0.003965 | 0.073798 | 1 |
| ENSG0000 | remission | Inflamed | RP11-569A | antisense chr1   | 2.03E+08 | 2.03E+08 | + | 314   | 8.217184 | 0.133652 | 0.795418 | 0.269626 | 2.95008  | 0.003965 | 0.073798 | 1 |
| ENSG0000 | remission | Inflamed | HSBP1L1   | protein_cc chr18 | 77724561 | 77730822 | + | 2056  | 898.315  | 0        | 0.579247 | 0.196357 | 2.949965 | 0.003966 | 0.073798 | 1 |
| ENSG0000 | remission | Inflamed | AC010525  | lincRNA chr19    | 56207251 | 56209196 | + | 537   | 33.59666 | 0.038186 | 0.891636 | 0.302291 | 2.949597 | 0.003971 | 0.073827 | 1 |
| ENSG0000 | remission | Inflamed | IGKV2-28  | IG_V_gene chr2   | 89521179 | 89521942 | - | 390   | 844.1313 | 0.002387 | -1.40612 | 0.476893 | -2.9485  | 0.003984 | 0.073987 | 1 |
| ENSG0000 | remission | Inflamed | RP3-406A  | lincRNA chr6     | 1.37E+08 | 1.37E+08 | - | 374   | 35.61575 | 0        | 0.892567 | 0.302735 | 2.948348 | 0.003986 | 0.073987 | 1 |
| ENSG0000 | remission | Inflamed | CETP      | protein_cc chr16 | 56995762 | 57017757 | + | 2085  | 75.50835 | 0.00716  | -1.04517 | 0.354517 | -2.94815 | 0.003988 | 0.073987 | 1 |
| ENSG0000 | remission | Inflamed | OLIG1     | protein_cc chr21 | 34442450 | 34444726 | + | 2277  | 35.39618 | 0.0358   | -1.18978 | 0.403629 | -2.94769 | 0.003993 | 0.074036 | 1 |
| ENSG0000 | remission | Inflamed | SPATA20P  | pseudoger chr21  | 39610149 | 39610586 | - | 438   | 2.682578 | 0.687351 | -0.92422 | 0.313634 | -2.9468  | 0.004004 | 0.074131 | 1 |
| ENSG0000 | remission | Inflamed | CTC-349C  | protein_cc chr5  | 1.34E+08 | 1.35E+08 | + | 5007  | 56.00239 | 0.004773 | 0.623425 | 0.211561 | 2.946787 | 0.004004 | 0.074131 | 1 |
| ENSG0000 | remission | Inflamed | LRWD1     | protein_cc chr7  | 1.02E+08 | 1.02E+08 | + | 5926  | 948.2458 | 0        | -0.35219 | 0.119594 | -2.94488 | 0.004027 | 0.074484 | 1 |
| ENSG0000 | remission | Inflamed | MIR223    | miRNA chrX       | 65238712 | 65238821 | + | 110   | 11.34368 | 0.178998 | -1.09201 | 0.370836 | -2.94471 | 0.004029 | 0.074484 | 1 |
| ENSG0000 | remission | Inflamed | CA12      | protein_cc chr15 | 63613577 | 63674360 | - | 7313  | 16402.57 | 0        | 0.861744 | 0.29267  | 2.944421 | 0.004032 | 0.074496 | 1 |
| ENSG0000 | remission | Inflamed | ACAN      | protein_cc chr15 | 89346674 | 89418585 | + | 10908 | 51.64678 | 0.078759 | -1.49635 | 0.508407 | -2.94321 | 0.004047 | 0.074699 | 1 |
| ENSG0000 | remission | Inflamed | RETN      | protein_cc chr19 | 7733930  | 7735334  | + | 514   | 5.023866 | 0.439141 | -1.02653 | 0.348802 | -2.94303 | 0.004049 | 0.074699 | 1 |
| ENSG0000 | remission | Inflamed | GYPC      | protein_cc chr2  | 1.27E+08 | 1.27E+08 | + | 3237  | 786.1933 | 0        | -0.82907 | 0.281749 | -2.94259 | 0.004054 | 0.074714 | 1 |
| ENSG0000 | remission | Inflamed | SURF4     | protein_cc chr9  | 1.36E+08 | 1.36E+08 | - | 3229  | 14527.57 | 0        | -0.2869  | 0.097506 | -2.94238 | 0.004057 | 0.074714 | 1 |
| ENSG0000 | remission | Inflamed | IGKV1D-43 | IG_V_gene chr2   | 90248739 | 90249395 | + | 532   | 18.03103 | 0.121718 | -1.1549  | 0.392532 | -2.94218 | 0.004059 | 0.074714 | 1 |
| ENSG0000 | remission | Inflamed | FAM101A   | protein_cc chr12 | 1.24E+08 | 1.25E+08 | + | 2969  | 1472.277 | 0        | 0.8674   | 0.294832 | 2.942017 | 0.004061 | 0.074714 | 1 |
| ENSG0000 | remission | Inflamed | HEY2      | protein_cc chr6  | 1.26E+08 | 1.26E+08 | + | 2741  | 56.81146 | 0.004773 | -0.79089 | 0.268883 | -2.94137 | 0.004069 | 0.074805 | 1 |
| ENSG0000 | remission | Inflamed | AC114812  | pseudoger chr2   | 2.35E+08 | 2.35E+08 | + | 757   | 1.260143 | 0.704057 | 0.490872 | 0.166899 | 2.941126 | 0.004072 | 0.074807 | 1 |
| ENSG0000 | remission | Inflamed | PRAF2     | protein_cc chrX  | 48928813 | 48931730 | - | 1738  | 457.8329 | 0        | -0.58546 | 0.199131 | -2.94008 | 0.004085 | 0.074988 | 1 |
| ENSG0000 | remission | Inflamed | RP11-689E | antisense chr12  | 1.09E+08 | 1.09E+08 | + | 859   | 31.35322 | 0.02864  | -1.05409 | 0.358568 | -2.93973 | 0.004089 | 0.074989 | 1 |
| ENSG0000 | remission | Inflamed | UBE2M     | protein_cc chr19 | 59067079 | 59070327 | - | 1831  | 1821.993 | 0        | -0.2772  | 0.094303 | -2.93947 | 0.004092 | 0.074989 | 1 |
| ENSG0000 | remission | Inflamed | PDZK1IP1  | protein_cc chr1  | 47649265 | 47656716 | - | 1438  | 5309.575 | 0        | -1.24827 | 0.424729 | -2.93897 | 0.004098 | 0.074989 | 1 |
| ENSG0000 | remission | Inflamed | SNORA60   | snoRNA chr20     | 37078013 | 37078146 | + | 134   | 4.670644 | 0.205251 | 0.62061  | 0.211176 | 2.938833 | 0.0041   | 0.074989 | 1 |
| ENSG0000 | remission | Inflamed | CES2      | protein_cc chr16 | 66968347 | 66978999 | + | 5343  | 21055.9  | 0        | 0.857719 | 0.291894 | 2.938456 | 0.004104 | 0.074989 | 1 |
| ENSG0000 | remission | Inflamed | FAM101B   | protein_cc chr17 | 289769   | 295730   | - | 3621  | 1470.286 | 0        | -0.58799 | 0.20014  | -2.9379  | 0.004111 | 0.074989 | 1 |
| ENSG0000 | remission | Inflamed | MT-CO2    | protein_cc chrM  | 7586     | 8269     | + | 684   | 850853.2 | 0        | 0.5199   | 0.176971 | 2.937767 | 0.004113 | 0.074989 | 1 |



|          |           |          |           |            |       |          |          |   |       |          |          |          |          |          |          |          |   |
|----------|-----------|----------|-----------|------------|-------|----------|----------|---|-------|----------|----------|----------|----------|----------|----------|----------|---|
| ENSG0000 | remission | Inflamed | MT-TF     | Mt_tRNA    | chrM  | 577      | 647      | + | 71    | 278.9666 | 0        | 0.987219 | 0.336056 | 2.937658 | 0.004114 | 0.074989 | 1 |
| ENSG0000 | remission | Inflamed | IGLC3     | IG_C_gene  | chr22 | 23248512 | 23248973 | + | 462   | 44799.05 | 0        | -1.31839 | 0.448824 | -2.93744 | 0.004117 | 0.074989 | 1 |
| ENSG0000 | remission | Inflamed | HLA-DOB   | protein_cc | chr6  | 32780540 | 32784825 | - | 1858  | 252.2601 | 0        | -1.03722 | 0.353123 | -2.93729 | 0.004118 | 0.074989 | 1 |
| ENSG0000 | remission | Inflamed | MT-TA     | Mt_tRNA    | chrM  | 5587     | 5655     | - | 69    | 6.608592 | 0.126492 | 0.647409 | 0.220416 | 2.937209 | 0.004119 | 0.074989 | 1 |
| ENSG0000 | remission | Inflamed | SLAMF7    | protein_cc | chr1  | 1.61E+08 | 1.61E+08 | + | 4604  | 3738.169 | 0        | -0.91857 | 0.312771 | -2.93689 | 0.004123 | 0.074989 | 1 |
| ENSG0000 | remission | Inflamed | SPHK1     | protein_cc | chr17 | 74372665 | 74383941 | + | 4416  | 570.2649 | 0        | -1.01782 | 0.346611 | -2.93648 | 0.004128 | 0.074989 | 1 |
| ENSG0000 | remission | Inflamed | AC112721  | lincRNA    | chr2  | 2.38E+08 | 2.38E+08 | - | 541   | 4.224344 | 0.408115 | -0.85572 | 0.291431 | -2.93627 | 0.004131 | 0.074989 | 1 |
| ENSG0000 | remission | Inflamed | MFSD12    | protein_cc | chr19 | 3538259  | 3574288  | - | 5277  | 2531.442 | 0        | -0.46201 | 0.157374 | -2.93575 | 0.004137 | 0.074989 | 1 |
| ENSG0000 | remission | Inflamed | FFAR3     | protein_cc | chr19 | 35849362 | 35851387 | + | 1855  | 15.69451 | 0.157518 | -1.14797 | 0.391055 | -2.93556 | 0.00414  | 0.074989 | 1 |
| ENSG0000 | remission | Inflamed | IGHV3-33  | IG_V_gene  | chr14 | 1.07E+08 | 1.07E+08 | - | 431   | 5696.236 | 0        | -1.52949 | 0.521029 | -2.93551 | 0.00414  | 0.074989 | 1 |
| ENSG0000 | remission | Inflamed | RP11-7601 | lincRNA    | chr8  | 1.21E+08 | 1.21E+08 | + | 752   | 27.79475 | 0.0358   | 0.828675 | 0.282322 | 2.935208 | 0.004144 | 0.074989 | 1 |
| ENSG0000 | remission | Inflamed | GALNT2    | protein_cc | chr1  | 2.3E+08  | 2.3E+08  | + | 7944  | 6470.134 | 0        | -0.42776 | 0.145738 | -2.93509 | 0.004145 | 0.074989 | 1 |
| ENSG0000 | remission | Inflamed | CCT4P2    | pseudoger  | chrX  | 64490793 | 64492899 | + | 1548  | 1.200477 | 0.701671 | 0.479164 | 0.163262 | 2.934942 | 0.004147 | 0.074989 | 1 |
| ENSG0000 | remission | Inflamed | AC016683  | antisense  | chr2  | 1.14E+08 | 1.14E+08 | - | 1074  | 1.22673  | 0.708831 | -0.46969 | 0.160063 | -2.93442 | 0.004154 | 0.074989 | 1 |
| ENSG0000 | remission | Inflamed | LCN15     | protein_cc | chr9  | 1.4E+08  | 1.4E+08  | - | 2887  | 28.99523 | 0.126492 | 1.169553 | 0.398569 | 2.934378 | 0.004154 | 0.074989 | 1 |
| ENSG0000 | remission | Inflamed | LMAN2     | protein_cc | chr5  | 1.77E+08 | 1.77E+08 | - | 2357  | 6333.258 | 0        | -0.24313 | 0.082861 | -2.9342  | 0.004156 | 0.074989 | 1 |
| ENSG0000 | remission | Inflamed | NIPAL2    | protein_cc | chr8  | 99202061 | 99306621 | - | 5599  | 1763.859 | 0        | 0.804129 | 0.274096 | 2.933745 | 0.004162 | 0.074989 | 1 |
| ENSG0000 | remission | Inflamed | VNN1      | protein_cc | chr6  | 1.33E+08 | 1.33E+08 | - | 3106  | 994.7494 | 0        | -1.61188 | 0.549441 | -2.93368 | 0.004163 | 0.074989 | 1 |
| ENSG0000 | remission | Inflamed | MIR4461   | pseudoger  | chr5  | 1.34E+08 | 1.34E+08 | - | 297   | 6.193317 | 0.381862 | 0.672954 | 0.229408 | 2.933442 | 0.004166 | 0.074989 | 1 |
| ENSG0000 | remission | Inflamed | TPPP2     | protein_cc | chr14 | 21492268 | 21504435 | + | 2475  | 4.73031  | 0.334129 | 0.603574 | 0.205763 | 2.93334  | 0.004167 | 0.074989 | 1 |
| ENSG0000 | remission | Inflamed | MEDAG     | protein_cc | chr13 | 31480328 | 31499709 | + | 2374  | 188.2864 | 0.026253 | -1.61766 | 0.55148  | -2.93331 | 0.004167 | 0.074989 | 1 |
| ENSG0000 | remission | Inflamed | IGLV3-19  | IG_V_gene  | chr22 | 23063108 | 23063630 | + | 377   | 8891.539 | 0        | -1.35929 | 0.4634   | -2.9333  | 0.004167 | 0.074989 | 1 |
| ENSG0000 | remission | Inflamed | NCF1C     | pseudoger  | chr7  | 74572445 | 74587848 | - | 1892  | 271.4606 | 0        | -0.89586 | 0.305435 | -2.93307 | 0.00417  | 0.074989 | 1 |
| ENSG0000 | remission | Inflamed | ST6GALNA  | protein_cc | chr9  | 1.31E+08 | 1.31E+08 | - | 2630  | 1968.535 | 0        | -0.48349 | 0.164857 | -2.93281 | 0.004173 | 0.074996 | 1 |
| ENSG0000 | remission | Inflamed | RP11-3861 | lincRNA    | chr15 | 93138790 | 93139692 | - | 374   | 5.651551 | 0.303103 | 0.875958 | 0.298721 | 2.932362 | 0.004179 | 0.075044 | 1 |
| ENSG0000 | remission | Inflamed | DDX50P1   | pseudoger  | chr2  | 32426669 | 32429068 | + | 2400  | 10.26253 | 0.097852 | 0.82952  | 0.282919 | 2.932003 | 0.004183 | 0.075072 | 1 |
| ENSG0000 | remission | Inflamed | MSTN      | protein_cc | chr2  | 1.91E+08 | 1.91E+08 | - | 2822  | 4.653938 | 0.26253  | 0.758852 | 0.258839 | 2.931749 | 0.004187 | 0.075075 | 1 |
| ENSG0000 | remission | Inflamed | RP1-229K2 | pseudoger  | chr6  | 41237613 | 41237977 | - | 365   | 4.756563 | 0.596659 | -1.08766 | 0.371019 | -2.93153 | 0.004189 | 0.075075 | 1 |
| ENSG0000 | remission | Inflamed | DCSTAMP   | protein_cc | chr8  | 1.05E+08 | 1.05E+08 | + | 2778  | 13.08592 | 0.224344 | -1.10416 | 0.37674  | -2.93084 | 0.004198 | 0.075178 | 1 |
| ENSG0000 | remission | Inflamed | ABCA8     | protein_cc | chr17 | 66863433 | 66951533 | - | 11288 | 614.3747 | 0.004773 | 1.279258 | 0.436767 | 2.928926 | 0.004222 | 0.075473 | 1 |
| ENSG0000 | remission | Inflamed | ANK1      | protein_cc | chr8  | 41510739 | 41754280 | - | 10799 | 186.5561 | 0.009547 | -1.1235  | 0.383592 | -2.92891 | 0.004222 | 0.075473 | 1 |
| ENSG0000 | remission | Inflamed | RP11-757F | antisense  | chr3  | 1.12E+08 | 1.12E+08 | + | 1937  | 106.1122 | 0.016706 | 1.355861 | 0.462966 | 2.928641 | 0.004225 | 0.075473 | 1 |
| ENSG0000 | remission | Inflamed | DNASE2    | protein_cc | chr19 | 12986025 | 12992282 | - | 2389  | 1516.069 | 0        | -0.36311 | 0.12399  | -2.92856 | 0.004226 | 0.075473 | 1 |
| ENSG0000 | remission | Inflamed | RP11-434I | pseudoger  | chr17 | 20458284 | 20462723 | - | 739   | 1.064439 | 0.74463  | 0.435015 | 0.148552 | 2.928363 | 0.004229 | 0.075473 | 1 |
| ENSG0000 | remission | Inflamed | RP5-894D1 | lincRNA    | chr6  | 1.71E+08 | 1.71E+08 | - | 1953  | 5.312649 | 0.145585 | 0.667637 | 0.228026 | 2.927903 | 0.004234 | 0.075504 | 1 |
| ENSG0000 | remission | Inflamed | ATF4P3    | pseudoger  | chr17 | 74221832 | 74222887 | - | 1056  | 21.53461 | 0        | -0.5044  | 0.172298 | -2.92747 | 0.00424  | 0.075504 | 1 |
| ENSG0000 | remission | Inflamed | CECR3     | processed  | chr22 | 17737749 | 17747623 | - | 1915  | 2.162291 | 0.556086 | 0.562945 | 0.192313 | 2.927239 | 0.004243 | 0.075504 | 1 |
| ENSG0000 | remission | Inflamed | RP11-297M | lincRNA    | chr16 | 9847272  | 9851895  | - | 4624  | 12.01909 | 0.157518 | 0.980992 | 0.335138 | 2.927131 | 0.004244 | 0.075504 | 1 |
| ENSG0000 | remission | Inflamed | RAG1      | protein_cc | chr11 | 36532259 | 36614706 | + | 7815  | 61.53938 | 0.009547 | 0.814763 | 0.278354 | 2.927076 | 0.004245 | 0.075504 | 1 |
| ENSG0000 | remission | Inflamed | C17orf50  | protein_cc | chr17 | 34087916 | 34092098 | + | 1063  | 1.53222  | 0.591885 | 0.386489 | 0.132067 | 2.926449 | 0.004253 | 0.075513 | 1 |

|          |           |          |           |               |       |          |          |   |       |          |          |          |          |          |          |          |   |
|----------|-----------|----------|-----------|---------------|-------|----------|----------|---|-------|----------|----------|----------|----------|----------|----------|----------|---|
| ENSG0000 | remission | Inflamed | SYT7      | protein_cc    | chr11 | 61282785 | 61348620 | - | 5953  | 1333.243 | 0        | 0.83835  | 0.286493 | 2.926251 | 0.004255 | 0.075513 | 1 |
| ENSG0000 | remission | Inflamed | RP11-483E | lincRNA       | chr3  | 1.5E+08  | 1.5E+08  | - | 335   | 0.866348 | 0.785203 | 0.349137 | 0.119313 | 2.926229 | 0.004255 | 0.075513 | 1 |
| ENSG0000 | remission | Inflamed | NPY1R     | protein_cc    | chr4  | 1.64E+08 | 1.64E+08 | - | 4180  | 113.1074 | 0.00716  | 1.192673 | 0.407667 | 2.925602 | 0.004263 | 0.075513 | 1 |
| ENSG0000 | remission | Inflamed | PKM       | protein_cc    | chr15 | 72491370 | 72524164 | - | 8572  | 35795.57 | 0        | -0.42764 | 0.146181 | -2.92544 | 0.004265 | 0.075513 | 1 |
| ENSG0000 | remission | Inflamed | RP11-130L | lincRNA       | chr2  | 20786008 | 20786446 | - | 439   | 3.713604 | 0.27685  | 0.636423 | 0.217556 | 2.925327 | 0.004267 | 0.075513 | 1 |
| ENSG0000 | remission | Inflamed | B4GALT3   | protein_cc    | chr1  | 1.61E+08 | 1.61E+08 | - | 3419  | 2035.883 | 0        | -0.28876 | 0.098714 | -2.92516 | 0.004269 | 0.075513 | 1 |
| ENSG0000 | remission | Inflamed | AC016747  | processed_chr | 2     | 61368732 | 61372104 | - | 3104  | 69.26253 | 0.002387 | -0.82282 | 0.281298 | -2.92508 | 0.00427  | 0.075513 | 1 |
| ENSG0000 | remission | Inflamed | MGC1095!  | protein_cc    | chr2  | 74361599 | 74362521 | + | 923   | 1.988067 | 0.653938 | 0.574663 | 0.196467 | 2.924982 | 0.004271 | 0.075513 | 1 |
| ENSG0000 | remission | Inflamed | ILDR2     | protein_cc    | chr1  | 1.67E+08 | 1.67E+08 | - | 8283  | 39.88783 | 0.02864  | 0.965243 | 0.330051 | 2.924525 | 0.004277 | 0.075564 | 1 |
| ENSG0000 | remission | Inflamed | RP11-1084 | antisense     | chr8  | 1.1E+08  | 1.1E+08  | - | 890   | 5.980907 | 0.295943 | -0.86959 | 0.297435 | -2.92362 | 0.004288 | 0.075716 | 1 |
| ENSG0000 | remission | Inflamed | RP13-494C | lincRNA       | chr4  | 25866503 | 25871172 | - | 762   | 1.852029 | 0.577566 | -0.59144 | 0.202339 | -2.923   | 0.004296 | 0.075772 | 1 |
| ENSG0000 | remission | Inflamed | SLC7A11   | protein_cc    | chr4  | 1.39E+08 | 1.39E+08 | - | 9645  | 414.6754 | 0        | -1.19497 | 0.408849 | -2.92277 | 0.004299 | 0.075772 | 1 |
| ENSG0000 | remission | Inflamed | DUSP1     | protein_cc    | chr5  | 1.72E+08 | 1.72E+08 | - | 2019  | 4285.241 | 0        | -0.95583 | 0.327042 | -2.92266 | 0.004301 | 0.075772 | 1 |
| ENSG0000 | remission | Inflamed | IGKV4-1   | IG_V_gene     | chr2  | 89184913 | 89185669 | + | 538   | 24495.63 | 0        | -1.41855 | 0.485431 | -2.92224 | 0.004306 | 0.075772 | 1 |
| ENSG0000 | remission | Inflamed | RP11-383C | sense_intr    | chr10 | 1.27E+08 | 1.27E+08 | - | 300   | 1.665871 | 0.579952 | 0.547178 | 0.187247 | 2.922234 | 0.004306 | 0.075772 | 1 |
| ENSG0000 | remission | Inflamed | ACOX2     | protein_cc    | chr3  | 58490863 | 58523046 | - | 3859  | 430.7637 | 0        | 0.681694 | 0.233442 | 2.920182 | 0.004332 | 0.076119 | 1 |
| ENSG0000 | remission | Inflamed | DUSP16    | protein_cc    | chr12 | 12628829 | 12715317 | - | 4039  | 1970.573 | 0        | 0.625512 | 0.214229 | 2.919831 | 0.004337 | 0.076119 | 1 |
| ENSG0000 | remission | Inflamed | PLA2G12A  | protein_cc    | chr4  | 1.11E+08 | 1.11E+08 | - | 5228  | 869.2196 | 0        | 0.486992 | 0.166788 | 2.919827 | 0.004337 | 0.076119 | 1 |
| ENSG0000 | remission | Inflamed | IGLV5-37  | IG_V_gene     | chr22 | 22781876 | 22782371 | + | 374   | 313.9833 | 0.059666 | -1.71496 | 0.587372 | -2.91972 | 0.004338 | 0.076119 | 1 |
| ENSG0000 | remission | Inflamed | CACNG6    | protein_cc    | chr19 | 54495542 | 54515923 | + | 1853  | 7.78043  | 0.188544 | -0.9026  | 0.309204 | -2.91911 | 0.004346 | 0.076119 | 1 |
| ENSG0000 | remission | Inflamed | CYP1B1-A5 | antisense     | chr2  | 38302791 | 38408997 | + | 4138  | 18.33652 | 0.040573 | 0.790627 | 0.270859 | 2.91896  | 0.004348 | 0.076119 | 1 |
| ENSG0000 | remission | Inflamed | SAP30     | protein_cc    | chr4  | 1.74E+08 | 1.74E+08 | + | 1320  | 224.3675 | 0        | -0.41244 | 0.141317 | -2.91856 | 0.004353 | 0.076119 | 1 |
| ENSG0000 | remission | Inflamed | KLK7      | protein_cc    | chr19 | 51479729 | 51487355 | - | 2443  | 218.1742 | 0.470167 | -2.76742 | 0.94827  | -2.91839 | 0.004355 | 0.076119 | 1 |
| ENSG0000 | remission | Inflamed | AC072052  | pseudoger     | chr7  | 6530424  | 6530729  | - | 306   | 5.947494 | 0.212411 | 0.736801 | 0.252507 | 2.917941 | 0.004361 | 0.076119 | 1 |
| ENSG0000 | remission | Inflamed | SCGB2A1   | protein_cc    | chr11 | 61976140 | 61981408 | + | 518   | 62.34368 | 0.023866 | 1.27329  | 0.436423 | 2.917557 | 0.004366 | 0.076119 | 1 |
| ENSG0000 | remission | Inflamed | FAM50A    | protein_cc    | chrX  | 1.54E+08 | 1.54E+08 | + | 2567  | 1663.391 | 0        | -0.23128 | 0.079277 | -2.91744 | 0.004367 | 0.076119 | 1 |
| ENSG0000 | remission | Inflamed | ZNF259P1  | pseudoger     | chr6  | 1.09E+08 | 1.09E+08 | - | 4928  | 2.155131 | 0.505967 | 0.580805 | 0.199084 | 2.917388 | 0.004368 | 0.076119 | 1 |
| ENSG0000 | remission | Inflamed | TLN2      | protein_cc    | chr15 | 62682725 | 63136830 | + | 16202 | 3527.637 | 0        | 0.617303 | 0.211614 | 2.917121 | 0.004371 | 0.076119 | 1 |
| ENSG0000 | remission | Inflamed | EHD3      | protein_cc    | chr2  | 31456880 | 31492313 | + | 4959  | 729.7136 | 0        | -0.83487 | 0.286211 | -2.91697 | 0.004373 | 0.076119 | 1 |
| ENSG0000 | remission | Inflamed | PTGDR     | protein_cc    | chr14 | 52734431 | 52743442 | + | 3033  | 367.7757 | 0        | 0.912165 | 0.312732 | 2.91676  | 0.004376 | 0.076119 | 1 |
| ENSG0000 | remission | Inflamed | PLEKHO2   | protein_cc    | chr15 | 65134088 | 65160206 | + | 3720  | 2532.547 | 0        | -0.75    | 0.257147 | -2.91663 | 0.004378 | 0.076119 | 1 |
| ENSG0000 | remission | Inflamed | WDR88     | protein_cc    | chr19 | 33622996 | 33666701 | + | 1841  | 1.224344 | 0.673031 | 0.427524 | 0.146587 | 2.916513 | 0.004379 | 0.076119 | 1 |
| ENSG0000 | remission | Inflamed | PGLYRP2   | protein_cc    | chr19 | 15579456 | 15609767 | - | 3188  | 8.539379 | 0.095465 | -0.82159 | 0.28171  | -2.91643 | 0.00438  | 0.076119 | 1 |
| ENSG0000 | remission | Inflamed | MAMDC2-   | antisense     | chr9  | 72700732 | 72790804 | - | 7244  | 12.03103 | 0.071599 | 0.828619 | 0.28413  | 2.916333 | 0.004382 | 0.076119 | 1 |
| ENSG0000 | remission | Inflamed | RHOU      | protein_cc    | chr1  | 2.29E+08 | 2.29E+08 | + | 4372  | 1569.408 | 0        | 0.925379 | 0.317335 | 2.916098 | 0.004385 | 0.076119 | 1 |
| ENSG0000 | remission | Inflamed | BCL3      | protein_cc    | chr19 | 45250962 | 45263301 | + | 3242  | 4723.692 | 0        | -0.53463 | 0.18338  | -2.91542 | 0.004393 | 0.076119 | 1 |
| ENSG0000 | remission | Inflamed | RP11-321C | lincRNA       | chr15 | 63682335 | 63729347 | + | 1058  | 62.36277 | 0.052506 | 1.24739  | 0.427877 | 2.915301 | 0.004395 | 0.076119 | 1 |
| ENSG0000 | remission | Inflamed | RPS14P3   | pseudoger     | chr1  | 19934608 | 19935062 | + | 455   | 20.29833 | 0.01432  | 0.746446 | 0.256048 | 2.915255 | 0.004396 | 0.076119 | 1 |
| ENSG0000 | remission | Inflamed | SLC39A1   | protein_cc    | chr1  | 1.54E+08 | 1.54E+08 | - | 3246  | 3792.026 | 0        | -0.26162 | 0.089744 | -2.9152  | 0.004396 | 0.076119 | 1 |
| ENSG0000 | remission | Inflamed | DSCAML1   | protein_cc    | chr11 | 1.17E+08 | 1.18E+08 | - | 7035  | 78.03819 | 0.01432  | 1.070624 | 0.367286 | 2.91496  | 0.004399 | 0.076119 | 1 |

|          |           |          |           |            |       |          |          |   |       |          |          |          |          |          |          |          |   |
|----------|-----------|----------|-----------|------------|-------|----------|----------|---|-------|----------|----------|----------|----------|----------|----------|----------|---|
| ENSG0000 | remission | Inflamed | IGLC6     | IG_C_pseu  | chr22 | 23261707 | 23262023 | + | 317   | 240.6635 | 0.004773 | -1.19286 | 0.40924  | -2.91481 | 0.004401 | 0.076119 | 1 |
| ENSG0000 | remission | Inflamed | ALOX5AP   | protein_cc | chr13 | 31309645 | 31338556 | + | 1344  | 519.6754 | 0        | -0.83962 | 0.288072 | -2.91461 | 0.004404 | 0.076119 | 1 |
| ENSG0000 | remission | Inflamed | TALDO1    | protein_cc | chr11 | 747329   | 765024   | + | 3005  | 4768.74  | 0        | -0.32713 | 0.11225  | -2.91433 | 0.004408 | 0.076132 | 1 |
| ENSG0000 | remission | Inflamed | RP11-65J3 | lincRNA    | chr9  | 1.32E+08 | 1.32E+08 | + | 1594  | 52.17661 | 0        | -0.86573 | 0.297109 | -2.91383 | 0.004414 | 0.076193 | 1 |
| ENSG0000 | remission | Inflamed | RANGRF    | protein_cc | chr17 | 8191815  | 8193410  | + | 1577  | 490.2005 | 0        | -0.40154 | 0.137851 | -2.91287 | 0.004426 | 0.076246 | 1 |
| ENSG0000 | remission | Inflamed | RP11-439E | sense_intr | chr1  | 2.47E+08 | 2.47E+08 | + | 1960  | 1.174224 | 0.704057 | 0.473891 | 0.162723 | 2.912255 | 0.004435 | 0.076246 | 1 |
| ENSG0000 | remission | Inflamed | INADL     | protein_cc | chr1  | 62208149 | 62629592 | + | 11456 | 1918.893 | 0        | 0.819938 | 0.281555 | 2.912174 | 0.004436 | 0.076246 | 1 |
| ENSG0000 | remission | Inflamed | KBTD11-   | lincRNA    | chr8  | 1919563  | 1924644  | + | 815   | 46.86874 | 0.011933 | 0.816904 | 0.28052  | 2.912107 | 0.004436 | 0.076246 | 1 |
| ENSG0000 | remission | Inflamed | TNFAIP8L1 | protein_cc | chr19 | 4639530  | 4655580  | + | 6667  | 966.3246 | 0        | -0.48377 | 0.166124 | -2.91208 | 0.004437 | 0.076246 | 1 |
| ENSG0000 | remission | Inflamed | SIRT5     | protein_cc | chr6  | 13574816 | 13614790 | + | 5368  | 582.6468 | 0        | 0.431542 | 0.148207 | 2.911753 | 0.004441 | 0.076246 | 1 |
| ENSG0000 | remission | Inflamed | C1QA      | protein_cc | chr1  | 22962999 | 22966101 | + | 1272  | 6434.263 | 0        | -0.61599 | 0.211572 | -2.91147 | 0.004445 | 0.076246 | 1 |
| ENSG0000 | remission | Inflamed | DEFB4B    | protein_cc | chr8  | 7272382  | 7274385  | - | 332   | 5.224344 | 0.742243 | -0.92631 | 0.318169 | -2.91137 | 0.004446 | 0.076246 | 1 |
| ENSG0000 | remission | Inflamed | SUCLG2    | protein_cc | chr3  | 67410884 | 67705038 | - | 3090  | 4987.007 | 0        | 0.643505 | 0.221044 | 2.911207 | 0.004448 | 0.076246 | 1 |
| ENSG0000 | remission | Inflamed | IGHV1-46  | IG_V_gene  | chr14 | 1.07E+08 | 1.07E+08 | - | 655   | 4421.845 | 0        | -1.41018 | 0.484403 | -2.91118 | 0.004449 | 0.076246 | 1 |
| ENSG0000 | remission | Inflamed | IGKV3-20  | IG_V_gene  | chr2  | 89442057 | 89442643 | - | 400   | 57836.42 | 0        | -1.40048 | 0.481075 | -2.91115 | 0.004449 | 0.076246 | 1 |
| ENSG0000 | remission | Inflamed | GADD45B   | protein_cc | chr19 | 2476120  | 2478257  | + | 2138  | 763.4272 | 0        | -0.70598 | 0.242533 | -2.91084 | 0.004453 | 0.076268 | 1 |
| ENSG0000 | remission | Inflamed | KIAA1737  | protein_cc | chr14 | 77564440 | 77583630 | + | 5300  | 1206.358 | 0        | 0.767801 | 0.263828 | 2.910235 | 0.004461 | 0.076354 | 1 |
| ENSG0000 | remission | Inflamed | NARF      | protein_cc | chr17 | 80416056 | 80448413 | + | 7939  | 1648.599 | 0        | -0.31301 | 0.107565 | -2.90999 | 0.004464 | 0.07636  | 1 |
| ENSG0000 | remission | Inflamed | RP11-526A | lincRNA    | chr4  | 1.5E+08  | 1.51E+08 | - | 2537  | 9.257757 | 0.243437 | 0.956398 | 0.328697 | 2.909665 | 0.004468 | 0.076382 | 1 |
| ENSG0000 | remission | Inflamed | C1orf122  | protein_cc | chr1  | 38272651 | 38275126 | + | 2231  | 1201.451 | 0        | -0.41104 | 0.141283 | -2.90937 | 0.004472 | 0.0764   | 1 |
| ENSG0000 | remission | Inflamed | RABAC1    | protein_cc | chr19 | 42460833 | 42463542 | - | 1999  | 2467.036 | 0        | -0.46881 | 0.161171 | -2.90875 | 0.004481 | 0.076435 | 1 |
| ENSG0000 | remission | Inflamed | MAP2K1P1  | pseudoger  | chr8  | 29885229 | 29886416 | + | 1188  | 1.355609 | 0.637232 | -0.46831 | 0.161006 | -2.90862 | 0.004482 | 0.076435 | 1 |
| ENSG0000 | remission | Inflamed | RP11-348A | antisense  | chr10 | 1.13E+08 | 1.13E+08 | + | 1649  | 28.02387 | 0.073986 | 1.1315   | 0.389025 | 2.90855  | 0.004483 | 0.076435 | 1 |
| ENSG0000 | remission | Inflamed | OTOP3     | protein_cc | chr17 | 72931814 | 72946087 | + | 2516  | 41.06205 | 0.171838 | 1.590991 | 0.547106 | 2.908011 | 0.00449  | 0.076465 | 1 |
| ENSG0000 | remission | Inflamed | AC024560  | lincRNA    | chr3  | 1.97E+08 | 1.97E+08 | - | 1471  | 9.902148 | 0.310263 | 0.810934 | 0.278868 | 2.907951 | 0.004491 | 0.076465 | 1 |
| ENSG0000 | remission | Inflamed | APOBEC3C  | protein_cc | chr22 | 39436924 | 39483748 | + | 5496  | 619.2243 | 0        | -0.73357 | 0.25228  | -2.90775 | 0.004494 | 0.076465 | 1 |
| ENSG0000 | remission | Inflamed | RP11-188F | antisense  | chr3  | 43388415 | 43389135 | - | 721   | 13.8926  | 0.097852 | 0.943593 | 0.324708 | 2.905971 | 0.004517 | 0.076793 | 1 |
| ENSG0000 | remission | Inflamed | RNA5SP43  | rRNA       | chr17 | 3960050  | 3960170  | - | 121   | 2.849642 | 0.424821 | 0.644466 | 0.221781 | 2.905861 | 0.004519 | 0.076793 | 1 |
| ENSG0000 | remission | Inflamed | ARHGEF9   | protein_cc | chrX  | 62854847 | 63005426 | - | 6673  | 1037.296 | 0        | 0.565507 | 0.194668 | 2.904984 | 0.00453  | 0.076941 | 1 |
| ENSG0000 | remission | Inflamed | RP11-970A | sense_intr | chr15 | 89045175 | 89049018 | - | 3844  | 57.96181 | 0.040573 | 1.171979 | 0.403471 | 2.904741 | 0.004534 | 0.076946 | 1 |
| ENSG0000 | remission | Inflamed | LINC00842 | lincRNA    | chr10 | 47011753 | 47174018 | - | 4893  | 19.80668 | 0.026253 | 0.86257  | 0.297006 | 2.904216 | 0.004541 | 0.07696  | 1 |
| ENSG0000 | remission | Inflamed | NFKBIA    | protein_cc | chr14 | 35870717 | 35873955 | - | 2373  | 4742.599 | 0        | -0.59625 | 0.205314 | -2.9041  | 0.004542 | 0.07696  | 1 |
| ENSG0000 | remission | Inflamed | IGLC2     | IG_C_gene  | chr22 | 23243156 | 23243617 | + | 462   | 43261.93 | 0        | -1.41389 | 0.486874 | -2.90402 | 0.004543 | 0.07696  | 1 |
| ENSG0000 | remission | Inflamed | CASS4     | protein_cc | chr20 | 54987168 | 55034396 | + | 4025  | 240.5131 | 0.004773 | -0.89958 | 0.309825 | -2.9035  | 0.00455  | 0.076998 | 1 |
| ENSG0000 | remission | Inflamed | HES2      | protein_cc | chr1  | 6472478  | 6484730  | - | 5407  | 1066.761 | 0        | 0.925372 | 0.318718 | 2.903416 | 0.004551 | 0.076998 | 1 |
| ENSG0000 | remission | Inflamed | POPDC3    | protein_cc | chr6  | 1.06E+08 | 1.06E+08 | - | 1881  | 22.52029 | 0.293556 | -1.39243 | 0.47965  | -2.90301 | 0.004557 | 0.07704  | 1 |
| ENSG0000 | remission | Inflamed | FOS       | protein_cc | chr14 | 75745477 | 75748933 | + | 3238  | 8625.709 | 0        | -1.15853 | 0.399186 | -2.90222 | 0.004567 | 0.077169 | 1 |
| ENSG0000 | remission | Inflamed | HYKK      | protein_cc | chr15 | 78799906 | 78829714 | + | 2732  | 75.3747  | 0        | 0.438166 | 0.150988 | 2.901989 | 0.00457  | 0.077173 | 1 |
| ENSG0000 | remission | Inflamed | NLRP7     | protein_cc | chr19 | 55434877 | 55477680 | - | 3914  | 52.89976 | 0.004773 | -1.20107 | 0.414034 | -2.90089 | 0.004585 | 0.077305 | 1 |
| ENSG0000 | remission | Inflamed | RP11-500C | antisense  | chr6  | 17706488 | 17707575 | + | 1088  | 40.0358  | 0        | -0.67363 | 0.232227 | -2.90075 | 0.004587 | 0.077305 | 1 |

|          |           |          |           |                  |          |          |   |      |          |          |          |          |          |          |          |   |
|----------|-----------|----------|-----------|------------------|----------|----------|---|------|----------|----------|----------|----------|----------|----------|----------|---|
| ENSG0000 | remission | Inflamed | LEF1-AS1  | processed_chr4   | 1.09E+08 | 1.09E+08 | + | 4799 | 9.637232 | 0.059666 | -0.60886 | 0.209903 | -2.90066 | 0.004588 | 0.077305 | 1 |
| ENSG0000 | remission | Inflamed | NWD1      | protein_cc chr19 | 16830787 | 16928774 | + | 8470 | 68.0358  | 0.026253 | 1.124697 | 0.387756 | 2.900532 | 0.00459  | 0.077305 | 1 |
| ENSG0000 | remission | Inflamed | ZFP36     | protein_cc chr19 | 39897453 | 39900052 | + | 2010 | 9882.673 | 0        | -0.68936 | 0.237687 | -2.90028 | 0.004594 | 0.077314 | 1 |
| ENSG0000 | remission | Inflamed | TSNARE1   | protein_cc chr8  | 1.43E+08 | 1.43E+08 | - | 4060 | 454.5036 | 0        | 0.497849 | 0.171722 | 2.899159 | 0.004609 | 0.077314 | 1 |
| ENSG0000 | remission | Inflamed | RP1-191J1 | antisense chr6   | 1.08E+08 | 1.08E+08 | + | 2574 | 15.63246 | 0.02864  | -0.6545  | 0.225764 | -2.89906 | 0.00461  | 0.077314 | 1 |
| ENSG0000 | remission | Inflamed | RP11-464F | antisense chr10  | 75413797 | 75434477 | + | 805  | 0.756563 | 0.792363 | 0.448279 | 0.154648 | 2.898716 | 0.004615 | 0.077314 | 1 |
| ENSG0000 | remission | Inflamed | CTA-398F1 | lincRNA chr8     | 8314419  | 8318847  | - | 510  | 3.033413 | 0.386635 | 0.685045 | 0.236366 | 2.898236 | 0.004621 | 0.077314 | 1 |
| ENSG0000 | remission | Inflamed | SERPINA1  | protein_cc chr14 | 94843084 | 94857030 | - | 4902 | 23503.42 | 0        | -0.61919 | 0.213645 | -2.89823 | 0.004621 | 0.077314 | 1 |
| ENSG0000 | remission | Inflamed | GDPD1     | protein_cc chr17 | 57297828 | 57353328 | + | 2970 | 71.61098 | 0        | 0.599858 | 0.206997 | 2.897909 | 0.004626 | 0.077314 | 1 |
| ENSG0000 | remission | Inflamed | MKRN1     | protein_cc chr7  | 1.4E+08  | 1.4E+08  | - | 5869 | 6197.358 | 0        | 0.448077 | 0.154621 | 2.897907 | 0.004626 | 0.077314 | 1 |
| ENSG0000 | remission | Inflamed | TPD52L2   | protein_cc chr20 | 62496596 | 62522898 | + | 4679 | 4273.031 | 0        | -0.25785 | 0.088984 | -2.89776 | 0.004628 | 0.077314 | 1 |
| ENSG0000 | remission | Inflamed | POLR2L    | protein_cc chr11 | 837356   | 842545   | - | 1142 | 2112.601 | 0        | -0.45315 | 0.156385 | -2.89764 | 0.004629 | 0.077314 | 1 |
| ENSG0000 | remission | Inflamed | BAIAP3    | protein_cc chr16 | 1383602  | 1399439  | + | 6143 | 314.6158 | 0        | 0.756284 | 0.261002 | 2.897613 | 0.00463  | 0.077314 | 1 |
| ENSG0000 | remission | Inflamed | CTD-2049C | antisense chr16  | 27690261 | 27730104 | - | 1200 | 1.210024 | 0.701671 | 0.565418 | 0.195135 | 2.89757  | 0.00463  | 0.077314 | 1 |
| ENSG0000 | remission | Inflamed | SLC5A7    | protein_cc chr2  | 1.09E+08 | 1.09E+08 | + | 5168 | 6.200477 | 0.305489 | 0.940237 | 0.324511 | 2.897394 | 0.004633 | 0.077314 | 1 |
| ENSG0000 | remission | Inflamed | IGKV1-27  | IG_V_gene chr2   | 89512908 | 89513413 | - | 382  | 3866.976 | 0        | -1.37149 | 0.473361 | -2.89734 | 0.004633 | 0.077314 | 1 |
| ENSG0000 | remission | Inflamed | LINC00968 | lincRNA chr8     | 57408805 | 57472382 | - | 2840 | 2.692124 | 0.522673 | -0.78922 | 0.272403 | -2.89723 | 0.004635 | 0.077314 | 1 |
| ENSG0000 | remission | Inflamed | MT1F      | protein_cc chr16 | 56691606 | 56694610 | + | 1889 | 546.494  | 0        | 0.978607 | 0.337818 | 2.89685  | 0.00464  | 0.077353 | 1 |
| ENSG0000 | remission | Inflamed | IGHG1     | IG_C_gene chr14  | 1.06E+08 | 1.06E+08 | - | 2762 | 647100.2 | 0        | -1.93072 | 0.666736 | -2.89577 | 0.004655 | 0.077548 | 1 |
| ENSG0000 | remission | Inflamed | TFPI2     | protein_cc chr7  | 93514709 | 93520303 | - | 2663 | 559.2768 | 0.009547 | -1.66924 | 0.576652 | -2.89471 | 0.004669 | 0.077709 | 1 |
| ENSG0000 | remission | Inflamed | RP11-22C1 | antisense chr8   | 95649513 | 95651695 | - | 2183 | 73.17184 | 0.011933 | 0.880617 | 0.304224 | 2.894634 | 0.00467  | 0.077709 | 1 |
| ENSG0000 | remission | Inflamed | KLRG2     | protein_cc chr7  | 1.39E+08 | 1.39E+08 | - | 2197 | 5.002387 | 0.484487 | 1.170438 | 0.404408 | 2.894199 | 0.004676 | 0.077759 | 1 |
| ENSG0000 | remission | Inflamed | RENBP     | protein_cc chrX  | 1.53E+08 | 1.53E+08 | - | 2146 | 345.1408 | 0        | -0.51786 | 0.178993 | -2.89315 | 0.004691 | 0.077949 | 1 |
| ENSG0000 | remission | Inflamed | AD000684  | sense_intr chr19 | 35753749 | 35755707 | + | 1016 | 30.82578 | 0.040573 | 0.838562 | 0.289993 | 2.89166  | 0.004711 | 0.078197 | 1 |
| ENSG0000 | remission | Inflamed | AK4P4     | pseudoger chr9   | 5855781  | 5856426  | - | 646  | 1.026253 | 0.718377 | 0.44101  | 0.152514 | 2.891597 | 0.004712 | 0.078197 | 1 |
| ENSG0000 | remission | Inflamed | RP11-395F | antisense chr9   | 1.31E+08 | 1.31E+08 | - | 745  | 350.1862 | 0        | 0.785375 | 0.271623 | 2.891421 | 0.004714 | 0.078197 | 1 |
| ENSG0000 | remission | Inflamed | C1QTNF1-1 | protein_cc chr17 | 77015291 | 77023737 | - | 966  | 7.563246 | 0.307876 | 0.881648 | 0.304942 | 2.891199 | 0.004718 | 0.078199 | 1 |
| ENSG0000 | remission | Inflamed | RP1-1700  | lincRNA chr7     | 27226192 | 27233067 | - | 556  | 48.48449 | 0.054893 | 0.837357 | 0.289652 | 2.890906 | 0.004722 | 0.078217 | 1 |
| ENSG0000 | remission | Inflamed | LUCAT1    | lincRNA chr5     | 90598846 | 90610219 | - | 2904 | 88.7685  | 0.176611 | -1.82819 | 0.632499 | -2.89043 | 0.004728 | 0.078277 | 1 |
| ENSG0000 | remission | Inflamed | RP11-103J | lincRNA chr20    | 10981952 | 10982411 | + | 460  | 2.319809 | 0.560859 | 0.586027 | 0.202777 | 2.890001 | 0.004734 | 0.078314 | 1 |
| ENSG0000 | remission | Inflamed | SLC31A2   | protein_cc chr9  | 1.16E+08 | 1.16E+08 | + | 2504 | 551.9642 | 0        | -0.46326 | 0.160306 | -2.88984 | 0.004736 | 0.078314 | 1 |
| ENSG0000 | remission | Inflamed | RP5-881L2 | antisense chr20  | 42976192 | 42983825 | - | 906  | 170.3938 | 0.009547 | 1.178273 | 0.407808 | 2.889283 | 0.004744 | 0.078392 | 1 |
| ENSG0000 | remission | Inflamed | SERPINH1  | protein_cc chr11 | 75273101 | 75283828 | + | 4914 | 5761.453 | 0        | -0.62484 | 0.216306 | -2.8887  | 0.004752 | 0.07847  | 1 |
| ENSG0000 | remission | Inflamed | RP11-557F | lincRNA chr6     | 1.35E+08 | 1.35E+08 | - | 1404 | 6.51074  | 0.159905 | -0.69934 | 0.24211  | -2.88852 | 0.004755 | 0.07847  | 1 |
| ENSG0000 | remission | Inflamed | C4orf50   | protein_cc chr4  | 5958845  | 5991545  | - | 4557 | 12.61337 | 0.286396 | -1.16378 | 0.403018 | -2.88766 | 0.004767 | 0.078604 | 1 |
| ENSG0000 | remission | Inflamed | RP11-4712 | lincRNA chr14    | 62023031 | 62037371 | - | 5148 | 22.73747 | 0.112172 | -1.13965 | 0.394685 | -2.8875  | 0.004769 | 0.078604 | 1 |
| ENSG0000 | remission | Inflamed | TRIM10    | protein_cc chr6  | 30119722 | 30128711 | - | 3546 | 304.9952 | 0.00716  | 0.966685 | 0.334902 | 2.886469 | 0.004783 | 0.078747 | 1 |
| ENSG0000 | remission | Inflamed | SH3D19    | protein_cc chr4  | 1.52E+08 | 1.52E+08 | - | 7789 | 4999.038 | 0        | 0.638748 | 0.221292 | 2.886454 | 0.004784 | 0.078747 | 1 |
| ENSG0000 | remission | Inflamed | SEC14L5   | protein_cc chr16 | 5008318  | 5069159  | + | 6477 | 74.39857 | 0.01432  | 1.250187 | 0.43327  | 2.88547  | 0.004797 | 0.07886  | 1 |
| ENSG0000 | remission | Inflamed | RP11-290F | lincRNA chr20    | 48909257 | 48931459 | + | 3014 | 32.46778 | 0.019093 | -0.91847 | 0.318309 | -2.88545 | 0.004798 | 0.07886  | 1 |

|          |           |          |           |                  |          |          |   |       |          |          |          |          |          |          |          |   |
|----------|-----------|----------|-----------|------------------|----------|----------|---|-------|----------|----------|----------|----------|----------|----------|----------|---|
| ENSG0000 | remission | Inflamed | DEGS1     | protein_cc chr1  | 2.24E+08 | 2.24E+08 | + | 2515  | 1337.604 | 0        | -0.45903 | 0.159093 | -2.88532 | 0.004799 | 0.07886  | 1 |
| ENSG0000 | remission | Inflamed | RP11-351J | lincRNA chr6     | 1.68E+08 | 1.68E+08 | - | 2557  | 25.69212 | 0.01432  | 0.769744 | 0.266812 | 2.884967 | 0.004804 | 0.078893 | 1 |
| ENSG0000 | remission | Inflamed | RRN3P3    | pseudoger chr16  | 22430090 | 22449036 | - | 3269  | 278.7017 | 0        | 0.541643 | 0.187791 | 2.884284 | 0.004814 | 0.078916 | 1 |
| ENSG0000 | remission | Inflamed | AC087380  | pseudoger chr11  | 5539671  | 5546185  | - | 1478  | 4.98568  | 0.23389  | 0.691486 | 0.239748 | 2.88422  | 0.004815 | 0.078916 | 1 |
| ENSG0000 | remission | Inflamed | SIGLEC10  | protein_cc chr19 | 51913275 | 51921057 | - | 3667  | 1314.695 | 0        | -0.69407 | 0.240662 | -2.88402 | 0.004818 | 0.078916 | 1 |
| ENSG0000 | remission | Inflamed | FOXS1     | protein_cc chr20 | 30432103 | 30433420 | - | 1318  | 60.91408 | 0.004773 | -0.98618 | 0.341969 | -2.88383 | 0.00482  | 0.078916 | 1 |
| ENSG0000 | remission | Inflamed | PDK2      | protein_cc chr17 | 48172101 | 48189516 | + | 5481  | 1912.814 | 0        | 0.560099 | 0.194222 | 2.883802 | 0.004821 | 0.078916 | 1 |
| ENSG0000 | remission | Inflamed | CTD-2619J | antisense chr19  | 58873951 | 58877958 | + | 790   | 8.909308 | 0.097852 | 0.669092 | 0.232116 | 2.882577 | 0.004838 | 0.079143 | 1 |
| ENSG0000 | remission | Inflamed | CTD-2545I | lincRNA chr19    | 50990067 | 50990895 | - | 626   | 7.434368 | 0.181384 | -0.88745 | 0.307888 | -2.88239 | 0.004841 | 0.079143 | 1 |
| ENSG0000 | remission | Inflamed | UROS      | protein_cc chr10 | 1.27E+08 | 1.28E+08 | - | 4070  | 815.673  | 0        | -0.30599 | 0.106177 | -2.88187 | 0.004848 | 0.079177 | 1 |
| ENSG0000 | remission | Inflamed | C19orf35  | protein_cc chr19 | 2274631  | 2282181  | - | 2767  | 75.22196 | 0.002387 | -0.8326  | 0.288921 | -2.88175 | 0.00485  | 0.079177 | 1 |
| ENSG0000 | remission | Inflamed | FAM110D   | protein_cc chr1  | 26485511 | 26489119 | + | 1524  | 131.2005 | 0        | -0.78939 | 0.274004 | -2.88097 | 0.004861 | 0.079177 | 1 |
| ENSG0000 | remission | Inflamed | MT-ND6    | protein_cc chrM  | 14149    | 14673    | - | 525   | 5315.652 | 0        | 0.747083 | 0.259325 | 2.880876 | 0.004862 | 0.079177 | 1 |
| ENSG0000 | remission | Inflamed | ENPP7P4   | pseudoger chr3   | 1.26E+08 | 1.26E+08 | + | 1086  | 7.799523 | 0.167064 | 0.932003 | 0.323519 | 2.880832 | 0.004863 | 0.079177 | 1 |
| ENSG0000 | remission | Inflamed | GPR141    | protein_cc chr7  | 37723399 | 37873390 | + | 2312  | 42.99523 | 0.009547 | -0.76538 | 0.265682 | -2.88083 | 0.004863 | 0.079177 | 1 |
| ENSG0000 | remission | Inflamed | RP11-245J | antisense chr3   | 64005184 | 64005601 | + | 418   | 3.178998 | 0.341289 | 0.622395 | 0.216087 | 2.88029  | 0.004871 | 0.079177 | 1 |
| ENSG0000 | remission | Inflamed | PI3       | protein_cc chr20 | 43803517 | 43805185 | + | 577   | 16065.03 | 0        | -1.54444 | 0.536215 | -2.88027 | 0.004871 | 0.079177 | 1 |
| ENSG0000 | remission | Inflamed | OLIG2     | protein_cc chr21 | 34398153 | 34401504 | + | 3352  | 25.35561 | 0.064439 | -1.05603 | 0.366644 | -2.88025 | 0.004871 | 0.079177 | 1 |
| ENSG0000 | remission | Inflamed | FAM167A   | protein_cc chr8  | 11278972 | 11332224 | - | 5033  | 340.0263 | 0        | -0.93942 | 0.326186 | -2.88001 | 0.004874 | 0.079177 | 1 |
| ENSG0000 | remission | Inflamed | SLC10A5   | protein_cc chr8  | 82605842 | 82608409 | - | 2568  | 54.09069 | 0.009547 | 1.072129 | 0.37228  | 2.879901 | 0.004876 | 0.079177 | 1 |
| ENSG0000 | remission | Inflamed | LYSMD2    | protein_cc chr15 | 52015208 | 52043782 | - | 2074  | 327.7661 | 0        | -0.49625 | 0.172326 | -2.8797  | 0.004879 | 0.079177 | 1 |
| ENSG0000 | remission | Inflamed | AL049840. | protein_cc chr14 | 1.04E+08 | 1.04E+08 | + | 1543  | 65.50597 | 0.002387 | 0.524988 | 0.182366 | 2.878767 | 0.004892 | 0.079345 | 1 |
| ENSG0000 | remission | Inflamed | SCO2      | protein_cc chr22 | 50961997 | 50964868 | - | 1361  | 1166.986 | 0        | -0.33267 | 0.115578 | -2.87833 | 0.004898 | 0.079397 | 1 |
| ENSG0000 | remission | Inflamed | IGKV2D-4C | IG_V_gene chr2   | 89890601 | 89891307 | + | 336   | 708.8735 | 0.00716  | -1.7289  | 0.600775 | -2.87778 | 0.004906 | 0.079444 | 1 |
| ENSG0000 | remission | Inflamed | DRAP1     | protein_cc chr11 | 65686728 | 65689032 | + | 1737  | 1518.384 | 0        | -0.35526 | 0.123457 | -2.8776  | 0.004909 | 0.079444 | 1 |
| ENSG0000 | remission | Inflamed | VWA5B1    | protein_cc chr1  | 20617412 | 20681387 | + | 6377  | 12.77804 | 0.212411 | 0.92795  | 0.322498 | 2.877385 | 0.004912 | 0.079444 | 1 |
| ENSG0000 | remission | Inflamed | C3orf36   | protein_cc chr3  | 1.34E+08 | 1.34E+08 | - | 1665  | 65.07876 | 0.019093 | -0.84454 | 0.293519 | -2.87729 | 0.004914 | 0.079444 | 1 |
| ENSG0000 | remission | Inflamed | IGLV3-24  | IG_V_pseu chr22  | 23036924 | 23037437 | + | 197   | 7.229117 | 0.329356 | -1.00117 | 0.348034 | -2.87664 | 0.004923 | 0.079526 | 1 |
| ENSG0000 | remission | Inflamed | PCDH17    | protein_cc chr13 | 58205944 | 58303445 | + | 8242  | 323.074  | 0.00716  | -1.06199 | 0.369203 | -2.87645 | 0.004926 | 0.079526 | 1 |
| ENSG0000 | remission | Inflamed | SHBG      | protein_cc chr17 | 7517382  | 7536700  | + | 1812  | 10.3389  | 0.057279 | -0.66262 | 0.230371 | -2.8763  | 0.004928 | 0.079526 | 1 |
| ENSG0000 | remission | Inflamed | PMM1      | protein_cc chr22 | 41972898 | 41985894 | - | 5082  | 1107.749 | 0        | 0.441562 | 0.153536 | 2.875947 | 0.004933 | 0.07956  | 1 |
| ENSG0000 | remission | Inflamed | CSRNP1    | protein_cc chr3  | 39183346 | 39196053 | - | 3214  | 1912.31  | 0        | -0.6823  | 0.237285 | -2.87544 | 0.00494  | 0.079629 | 1 |
| ENSG0000 | remission | Inflamed | NOS2      | protein_cc chr17 | 26083792 | 26127525 | - | 4176  | 14841.25 | 0        | -1.74299 | 0.606494 | -2.87388 | 0.004963 | 0.079777 | 1 |
| ENSG0000 | remission | Inflamed | CBR3      | protein_cc chr21 | 37507210 | 37518864 | + | 1169  | 142.821  | 0        | -0.68102 | 0.236992 | -2.8736  | 0.004967 | 0.079777 | 1 |
| ENSG0000 | remission | Inflamed | SYNE2     | protein_cc chr14 | 64319683 | 64693165 | + | 31405 | 4259.601 | 0        | 0.650408 | 0.226341 | 2.873572 | 0.004967 | 0.079777 | 1 |
| ENSG0000 | remission | Inflamed | IGLV7-43  | IG_V_gene chr22  | 22749356 | 22749827 | + | 385   | 2570.928 | 0.002387 | -1.41686 | 0.493082 | -2.87347 | 0.004969 | 0.079777 | 1 |
| ENSG0000 | remission | Inflamed | RP1-80N2. | lincRNA chr6     | 6680542  | 6683866  | - | 3325  | 59.87351 | 0.026253 | 1.077391 | 0.374954 | 2.873397 | 0.00497  | 0.079777 | 1 |
| ENSG0000 | remission | Inflamed | PPP1R18   | protein_cc chr6  | 30644166 | 30655672 | - | 4599  | 3992.143 | 0        | -0.78241 | 0.272295 | -2.87339 | 0.00497  | 0.079777 | 1 |
| ENSG0000 | remission | Inflamed | SIDT1     | protein_cc chr3  | 1.13E+08 | 1.13E+08 | + | 8072  | 1481.117 | 0        | 0.625521 | 0.217699 | 2.873334 | 0.004971 | 0.079777 | 1 |
| ENSG0000 | remission | Inflamed | PSMB6     | protein_cc chr17 | 4699439  | 4701790  | + | 1420  | 1897.647 | 0        | -0.36953 | 0.128618 | -2.87311 | 0.004974 | 0.079781 | 1 |

|          |           |          |           |                  |          |          |   |       |          |          |          |          |          |          |          |   |
|----------|-----------|----------|-----------|------------------|----------|----------|---|-------|----------|----------|----------|----------|----------|----------|----------|---|
| ENSG0000 | remission | Inflamed | BCL2L12   | protein_cc chr19 | 50168823 | 50177173 | + | 1743  | 494.8496 | 0        | -0.4003  | 0.139406 | -2.87146 | 0.004998 | 0.079987 | 1 |
| ENSG0000 | remission | Inflamed | TOM1L1    | protein_cc chr17 | 52976748 | 53039310 | + | 7268  | 980.4797 | 0        | 0.666717 | 0.232208 | 2.8712   | 0.005002 | 0.079987 | 1 |
| ENSG0000 | remission | Inflamed | HDAC1P1   | pseudoger chr10  | 95897505 | 95899257 | + | 1445  | 2.832936 | 0.424821 | 0.619702 | 0.215845 | 2.871054 | 0.005004 | 0.079987 | 1 |
| ENSG0000 | remission | Inflamed | AC073072  | antisense chr7   | 22765014 | 22767239 | - | 1364  | 6.054893 | 0.357995 | -0.90184 | 0.314137 | -2.87085 | 0.005007 | 0.079987 | 1 |
| ENSG0000 | remission | Inflamed | RNU6-678  | snRNA chr3       | 1.33E+08 | 1.33E+08 | + | 100   | 1.281623 | 0.653938 | 0.430897 | 0.150099 | 2.87076  | 0.005008 | 0.079987 | 1 |
| ENSG0000 | remission | Inflamed | CTSV      | protein_cc chr9  | 99794940 | 99801925 | - | 1721  | 112.4368 | 0.004773 | 1.159045 | 0.403842 | 2.870042 | 0.005018 | 0.079987 | 1 |
| ENSG0000 | remission | Inflamed | TPRG1L    | protein_cc chr1  | 3541566  | 3546691  | + | 2414  | 3689.589 | 0        | 0.350018 | 0.121964 | 2.869838 | 0.005021 | 0.079987 | 1 |
| ENSG0000 | remission | Inflamed | CARD14    | protein_cc chr17 | 78143791 | 78183130 | + | 8232  | 161.5394 | 0        | -0.99987 | 0.348407 | -2.86983 | 0.005022 | 0.079987 | 1 |
| ENSG0000 | remission | Inflamed | REPS2     | protein_cc chrX  | 16964814 | 17171395 | + | 11361 | 833.9976 | 0        | 0.517221 | 0.180235 | 2.869711 | 0.005023 | 0.079987 | 1 |
| ENSG0000 | remission | Inflamed | C7orf41   | protein_cc chr7  | 30174426 | 30202378 | + | 6532  | 580.8735 | 0        | 0.605794 | 0.211122 | 2.869409 | 0.005028 | 0.079987 | 1 |
| ENSG0000 | remission | Inflamed | CTA-150C  | lincRNA chr22    | 39317232 | 39320713 | + | 678   | 3.145585 | 0.556086 | 0.62503  | 0.217837 | 2.869253 | 0.00503  | 0.079987 | 1 |
| ENSG0000 | remission | Inflamed | IL21R     | protein_cc chr16 | 27413483 | 27462115 | + | 4219  | 662.5274 | 0        | -1.09116 | 0.380303 | -2.8692  | 0.005031 | 0.079987 | 1 |
| ENSG0000 | remission | Inflamed | ADPRHL1   | protein_cc chr13 | 1.14E+08 | 1.14E+08 | - | 2308  | 134.179  | 0        | 0.494852 | 0.172473 | 2.869164 | 0.005031 | 0.079987 | 1 |
| ENSG0000 | remission | Inflamed | RNASEH2A  | protein_cc chr19 | 12917394 | 12924452 | + | 2039  | 429.7924 | 0        | -0.3713  | 0.12942  | -2.86893 | 0.005035 | 0.079987 | 1 |
| ENSG0000 | remission | Inflamed | C17orf62  | protein_cc chr17 | 80400465 | 80408705 | - | 7234  | 4668.866 | 0        | -0.4604  | 0.160503 | -2.86852 | 0.005041 | 0.079987 | 1 |
| ENSG0000 | remission | Inflamed | CD38      | protein_cc chr4  | 15779898 | 15854853 | + | 6855  | 1144.84  | 0        | -1.0877  | 0.37921  | -2.86834 | 0.005043 | 0.079987 | 1 |
| ENSG0000 | remission | Inflamed | SLC17A8   | protein_cc chr12 | 1.01E+08 | 1.01E+08 | + | 4272  | 43.3747  | 0.126492 | 1.329378 | 0.463477 | 2.86827  | 0.005044 | 0.079987 | 1 |
| ENSG0000 | remission | Inflamed | VTCN1     | protein_cc chr1  | 1.18E+08 | 1.18E+08 | - | 3001  | 3.546539 | 0.587112 | -1.01194 | 0.352817 | -2.86817 | 0.005046 | 0.079987 | 1 |
| ENSG0000 | remission | Inflamed | THNSL1    | protein_cc chr10 | 25305587 | 25315593 | + | 3788  | 148.5298 | 0        | 0.620968 | 0.216507 | 2.868119 | 0.005047 | 0.079987 | 1 |
| ENSG0000 | remission | Inflamed | IGKV3D-7  | IG_V_gene chr2   | 90273679 | 90274235 | + | 382   | 18.58473 | 0.069212 | -1.10926 | 0.386765 | -2.86804 | 0.005048 | 0.079987 | 1 |
| ENSG0000 | remission | Inflamed | SAA4      | protein_cc chr11 | 18252896 | 18258440 | - | 727   | 8.847255 | 0.463007 | -1.24184 | 0.43302  | -2.86786 | 0.005051 | 0.079987 | 1 |
| ENSG0000 | remission | Inflamed | EVA1B     | protein_cc chr1  | 36787632 | 36789755 | - | 1211  | 446.8138 | 0        | -0.85842 | 0.299359 | -2.86751 | 0.005056 | 0.080019 | 1 |
| ENSG0000 | remission | Inflamed | NDUFA6-A  | processed_chr22  | 42486935 | 42535286 | + | 6653  | 176.685  | 0        | 0.421357 | 0.146965 | 2.867055 | 0.005062 | 0.080078 | 1 |
| ENSG0000 | remission | Inflamed | C17orf49  | protein_cc chr17 | 6917814  | 6920844  | + | 2628  | 260.6134 | 0        | -0.36017 | 0.125669 | -2.86598 | 0.005078 | 0.080282 | 1 |
| ENSG0000 | remission | Inflamed | IL10      | protein_cc chr1  | 2.07E+08 | 2.07E+08 | - | 1978  | 50.62053 | 0        | -0.82034 | 0.28628  | -2.8655  | 0.005085 | 0.080315 | 1 |
| ENSG0000 | remission | Inflamed | C14orf93  | protein_cc chr14 | 23456110 | 23479375 | - | 3250  | 394.957  | 0        | 0.281853 | 0.098364 | 2.865403 | 0.005087 | 0.080315 | 1 |
| ENSG0000 | remission | Inflamed | RNU6-140  | snRNA chr19      | 39287642 | 39287749 | - | 108   | 9.083532 | 0.190931 | 0.868819 | 0.303264 | 2.864893 | 0.005094 | 0.080315 | 1 |
| ENSG0000 | remission | Inflamed | IGKV2-24  | IG_V_gene chr2   | 89475812 | 89476644 | - | 390   | 3608.019 | 0.002387 | -1.39718 | 0.487693 | -2.86488 | 0.005094 | 0.080315 | 1 |
| ENSG0000 | remission | Inflamed | SNN       | protein_cc chr16 | 11762270 | 11773015 | + | 3312  | 995.8496 | 0        | -0.61066 | 0.213161 | -2.86481 | 0.005096 | 0.080315 | 1 |
| ENSG0000 | remission | Inflamed | CHN2      | protein_cc chr7  | 29161890 | 29553944 | + | 10853 | 449.2888 | 0        | 0.741785 | 0.259026 | 2.863748 | 0.005111 | 0.080514 | 1 |
| ENSG0000 | remission | Inflamed | CDKN2C    | protein_cc chr1  | 51426417 | 51440305 | + | 3318  | 458.9332 | 0        | -0.39978 | 0.139627 | -2.8632  | 0.00512  | 0.080593 | 1 |
| ENSG0000 | remission | Inflamed | RP11-106C | lincRNA chr12    | 94338817 | 94341589 | + | 2773  | 2.264916 | 0.455847 | 0.550762 | 0.192372 | 2.862998 | 0.005123 | 0.080593 | 1 |
| ENSG0000 | remission | Inflamed | C2ORF15   | protein_cc chr2  | 99757948 | 99767950 | + | 2098  | 37.69928 | 0.002387 | 0.609346 | 0.212851 | 2.862783 | 0.005126 | 0.080596 | 1 |
| ENSG0000 | remission | Inflamed | RAPGEFL1  | protein_cc chr17 | 38333263 | 38351908 | + | 5710  | 6827.659 | 0        | 0.877518 | 0.306628 | 2.861834 | 0.00514  | 0.080682 | 1 |
| ENSG0000 | remission | Inflamed | VSIG1     | protein_cc chrX  | 1.07E+08 | 1.07E+08 | + | 3769  | 223.7422 | 0.045346 | -1.85709 | 0.648918 | -2.86183 | 0.00514  | 0.080682 | 1 |
| ENSG0000 | remission | Inflamed | AGAP11    | processed_chr10  | 88752163 | 88769960 | + | 4560  | 5.360382 | 0.257757 | 0.701543 | 0.24514  | 2.8618   | 0.00514  | 0.080682 | 1 |
| ENSG0000 | remission | Inflamed | BEAN1     | protein_cc chr16 | 66461200 | 66527432 | + | 7165  | 36.90692 | 0.105012 | -1.43295 | 0.500809 | -2.86127 | 0.005148 | 0.080753 | 1 |
| ENSG0000 | remission | Inflamed | LINC0057C | lincRNA chr2     | 11534107 | 11543203 | + | 1650  | 14.87351 | 0.062053 | 0.874425 | 0.305627 | 2.861088 | 0.005151 | 0.080753 | 1 |
| ENSG0000 | remission | Inflamed | IGLV11-55 | IG_V_gene chr22  | 22556057 | 22556600 | + | 426   | 1.207637 | 0.718377 | -0.56707 | 0.198223 | -2.86074 | 0.005156 | 0.080787 | 1 |
| ENSG0000 | remission | Inflamed | KCNK10    | protein_cc chr14 | 88649113 | 88793251 | - | 5592  | 121.031  | 0.004773 | 1.012707 | 0.354099 | 2.859953 | 0.005168 | 0.080875 | 1 |

|          |           |          |           |                  |          |          |   |      |          |          |          |          |          |          |          |   |
|----------|-----------|----------|-----------|------------------|----------|----------|---|------|----------|----------|----------|----------|----------|----------|----------|---|
| ENSG0000 | remission | Inflamed | ABCA10    | protein_cc chr17 | 67143355 | 67240987 | - | 8405 | 116.3484 | 0        | 1.024946 | 0.358379 | 2.859953 | 0.005168 | 0.080875 | 1 |
| ENSG0000 | remission | Inflamed | PON3      | protein_cc chr7  | 94989256 | 95025680 | - | 4040 | 52.94511 | 0.004773 | 0.783259 | 0.273915 | 2.859494 | 0.005175 | 0.080935 | 1 |
| ENSG0000 | remission | Inflamed | LG11      | protein_cc chr10 | 95517566 | 95557916 | + | 2854 | 17.95943 | 0.097852 | 1.237976 | 0.433045 | 2.858769 | 0.005186 | 0.081058 | 1 |
| ENSG0000 | remission | Inflamed | MBNL1-AS  | antisense chr3   | 1.52E+08 | 1.52E+08 | - | 6585 | 188.9236 | 0        | 0.47917  | 0.167641 | 2.858313 | 0.005193 | 0.081108 | 1 |
| ENSG0000 | remission | Inflamed | ATP6V0B   | protein_cc chr1  | 44440159 | 44443967 | + | 3535 | 3662.797 | 0        | -0.33386 | 0.116815 | -2.85803 | 0.005197 | 0.081108 | 1 |
| ENSG0000 | remission | Inflamed | RP11-707C | pseudoger chr17  | 43678235 | 43679706 | - | 1472 | 15.44869 | 0.627685 | 0.606349 | 0.21218  | 2.857716 | 0.005202 | 0.081108 | 1 |
| ENSG0000 | remission | Inflamed | TAPBP     | protein_cc chr6  | 33267471 | 33282164 | - | 5056 | 15218.88 | 0        | -0.40412 | 0.14142  | -2.85758 | 0.005204 | 0.081108 | 1 |
| ENSG0000 | remission | Inflamed | SHMT2     | protein_cc chr12 | 57623110 | 57628718 | + | 4838 | 2811.819 | 0        | -0.38774 | 0.135698 | -2.85735 | 0.005207 | 0.081108 | 1 |
| ENSG0000 | remission | Inflamed | COPS7A    | protein_cc chr12 | 6832907  | 6841041  | + | 3113 | 1670.138 | 0        | -0.23618 | 0.082658 | -2.8573  | 0.005208 | 0.081108 | 1 |
| ENSG0000 | remission | Inflamed | PPARG     | protein_cc chr3  | 12328867 | 12475855 | + | 4046 | 1882.053 | 0        | 0.71455  | 0.250094 | 2.857127 | 0.005211 | 0.081108 | 1 |
| ENSG0000 | remission | Inflamed | ABHD8     | protein_cc chr19 | 17402940 | 17421045 | - | 2210 | 362.2196 | 0        | -0.52697 | 0.184458 | -2.85684 | 0.005215 | 0.081127 | 1 |
| ENSG0000 | remission | Inflamed | GGN       | protein_cc chr19 | 38874905 | 38878722 | - | 2447 | 20.86635 | 0.033413 | -0.8257  | 0.289056 | -2.85653 | 0.00522  | 0.081152 | 1 |
| ENSG0000 | remission | Inflamed | PI4KAP1   | pseudoger chr22  | 20383524 | 20427835 | - | 4808 | 431.8067 | 0        | 0.8275   | 0.289771 | 2.8557   | 0.005232 | 0.081301 | 1 |
| ENSG0000 | remission | Inflamed | DPF3      | protein_cc chr14 | 73086004 | 73360809 | - | 6868 | 294.7279 | 0        | 0.793946 | 0.278076 | 2.855139 | 0.005241 | 0.08134  | 1 |
| ENSG0000 | remission | Inflamed | IL12RB1   | protein_cc chr19 | 18169805 | 18209754 | - | 4298 | 583.284  | 0        | -0.69469 | 0.243312 | -2.85513 | 0.005241 | 0.08134  | 1 |
| ENSG0000 | remission | Inflamed | SCP2      | protein_cc chr1  | 53392901 | 53517375 | + | 8305 | 4876.172 | 0        | 0.540421 | 0.189325 | 2.854459 | 0.005251 | 0.081441 | 1 |
| ENSG0000 | remission | Inflamed | FAM160A1  | protein_cc chr4  | 1.52E+08 | 1.53E+08 | + | 4932 | 555.3771 | 0        | 0.926837 | 0.324717 | 2.854295 | 0.005254 | 0.081441 | 1 |
| ENSG0000 | remission | Inflamed | CTSW      | protein_cc chr11 | 65647280 | 65651212 | + | 1719 | 231.2578 | 0        | -0.62414 | 0.218702 | -2.85382 | 0.005261 | 0.081506 | 1 |
| ENSG0000 | remission | Inflamed | KIAA1199  | protein_cc chr15 | 81071684 | 81244117 | + | 7621 | 4416.494 | 0.002387 | -1.81513 | 0.636267 | -2.85279 | 0.005277 | 0.081673 | 1 |
| ENSG0000 | remission | Inflamed | FAM225A   | lincRNA chr9     | 1.16E+08 | 1.16E+08 | + | 6100 | 30.56086 | 0.004773 | -0.78322 | 0.274554 | -2.8527  | 0.005278 | 0.081673 | 1 |
| ENSG0000 | remission | Inflamed | CTC-251D  | antisense chr5   | 1.51E+08 | 1.51E+08 | + | 3317 | 34.84726 | 0.033413 | 0.929063 | 0.325712 | 2.852404 | 0.005283 | 0.081686 | 1 |
| ENSG0000 | remission | Inflamed | AP001271  | sense_intr chr11 | 70323382 | 70323697 | - | 206  | 1.954654 | 0.501193 | 0.507605 | 0.177971 | 2.852182 | 0.005286 | 0.081686 | 1 |
| ENSG0000 | remission | Inflamed | STAU2-AS1 | lincRNA chr8     | 74332239 | 74353761 | + | 2279 | 2.73031  | 0.443914 | 0.62643  | 0.219642 | 2.852045 | 0.005288 | 0.081686 | 1 |
| ENSG0000 | remission | Inflamed | RN7SKP11  | misc_RNA chr6    | 47683019 | 47683337 | + | 319  | 1.813842 | 0.579952 | 0.591273 | 0.207346 | 2.851629 | 0.005295 | 0.081736 | 1 |
| ENSG0000 | remission | Inflamed | RP11-6771 | antisense chr11  | 1.25E+08 | 1.25E+08 | - | 445  | 4.816229 | 0.205251 | 0.70865  | 0.248534 | 2.851318 | 0.005299 | 0.081762 | 1 |
| ENSG0000 | remission | Inflamed | GFAP      | protein_cc chr17 | 42982376 | 42994305 | - | 6086 | 15.48926 | 0.114558 | -1.0884  | 0.381779 | -2.85085 | 0.005307 | 0.081825 | 1 |
| ENSG0000 | remission | Inflamed | SEC11C    | protein_cc chr18 | 56806709 | 56826068 | + | 3656 | 2138.809 | 0        | -0.6183  | 0.216907 | -2.85055 | 0.005311 | 0.081849 | 1 |
| ENSG0000 | remission | Inflamed | FCGR1C    | pseudoger chr1   | 1.49E+08 | 1.49E+08 | + | 2167 | 13.77566 | 0.140811 | -1.03903 | 0.364547 | -2.85019 | 0.005317 | 0.081887 | 1 |
| ENSG0000 | remission | Inflamed | MT-TT     | Mt_tRNA chrM     | 15888    | 15953    | + | 66   | 184.3723 | 0.004773 | 0.785538 | 0.275736 | 2.848874 | 0.005337 | 0.082151 | 1 |
| ENSG0000 | remission | Inflamed | HOXA11-A  | antisense chr7   | 27224137 | 27228912 | + | 2917 | 605.1265 | 0        | 0.827977 | 0.290668 | 2.848534 | 0.005342 | 0.082184 | 1 |
| ENSG0000 | remission | Inflamed | ZDHC11E   | protein_cc chr5  | 710475   | 767067   | - | 3789 | 150.8544 | 0.016706 | 1.221269 | 0.428822 | 2.847964 | 0.005351 | 0.082268 | 1 |
| ENSG0000 | remission | Inflamed | snoU13    | snoRNA chr3      | 32214148 | 32214252 | + | 105  | 1.601432 | 0.591885 | 0.482754 | 0.16952  | 2.847778 | 0.005354 | 0.082268 | 1 |
| ENSG0000 | remission | Inflamed | EAF2      | protein_cc chr3  | 1.22E+08 | 1.22E+08 | + | 1770 | 253.9356 | 0        | -0.80489 | 0.282663 | -2.84753 | 0.005358 | 0.082278 | 1 |
| ENSG0000 | remission | Inflamed | RP11-5751 | lincRNA chr9     | 27829274 | 27844479 | + | 2084 | 1.854415 | 0.620525 | 0.454461 | 0.159662 | 2.846395 | 0.005376 | 0.082406 | 1 |
| ENSG0000 | remission | Inflamed | APOBEC3F  | protein_cc chr22 | 39436609 | 39449915 | + | 3242 | 225.4033 | 0        | -0.57554 | 0.202208 | -2.84627 | 0.005378 | 0.082406 | 1 |
| ENSG0000 | remission | Inflamed | LINC00327 | lincRNA chr13    | 24040710 | 24061603 | + | 3266 | 2.821002 | 0.389021 | 0.566191 | 0.198928 | 2.846208 | 0.005379 | 0.082406 | 1 |
| ENSG0000 | remission | Inflamed | ANXA5     | protein_cc chr4  | 1.23E+08 | 1.23E+08 | - | 3034 | 5400.561 | 0        | -0.60574 | 0.212839 | -2.84597 | 0.005382 | 0.082406 | 1 |
| ENSG0000 | remission | Inflamed | ATP8B1    | protein_cc chr18 | 55313658 | 55470333 | - | 6652 | 12863.99 | 0        | 0.926289 | 0.325476 | 2.845955 | 0.005383 | 0.082406 | 1 |
| ENSG0000 | remission | Inflamed | RP11-96K1 | antisense chr1   | 1.12E+08 | 1.12E+08 | + | 1348 | 3.114558 | 0.252983 | -0.52178 | 0.18335  | -2.84579 | 0.005385 | 0.082406 | 1 |
| ENSG0000 | remission | Inflamed | MMP23A    | pseudoger chr1   | 1631369  | 1633249  | + | 1124 | 3.529833 | 0.274463 | 0.521045 | 0.183132 | 2.845191 | 0.005394 | 0.082478 | 1 |

|          |           |          |           |            |       |          |          |   |       |          |          |          |          |          |          |          |   |
|----------|-----------|----------|-----------|------------|-------|----------|----------|---|-------|----------|----------|----------|----------|----------|----------|----------|---|
| ENSG0000 | remission | Inflamed | PTPN3     | protein_cc | chr9  | 1.12E+08 | 1.12E+08 | - | 10071 | 2146.093 | 0        | 0.708566 | 0.249049 | 2.845089 | 0.005396 | 0.082478 | 1 |
| ENSG0000 | remission | Inflamed | IGHV4-4   | IG_V_gene  | chr14 | 1.06E+08 | 1.06E+08 | - | 412   | 2983.057 | 0        | -1.22925 | 0.432237 | -2.84393 | 0.005414 | 0.082708 | 1 |
| ENSG0000 | remission | Inflamed | FOXD4L3   | protein_cc | chr9  | 70917276 | 70920000 | + | 2725  | 2.102625 | 0.534606 | 0.586312 | 0.206277 | 2.842351 | 0.005439 | 0.082999 | 1 |
| ENSG0000 | remission | Inflamed | RP11-2171 | pseudoger  | chrX  | 79528830 | 79565669 | - | 500   | 2.608592 | 0.451074 | 0.609396 | 0.214409 | 2.842207 | 0.005441 | 0.082999 | 1 |
| ENSG0000 | remission | Inflamed | C6orf136  | protein_cc | chr6  | 30614816 | 30620987 | + | 2118  | 1612.057 | 0        | 0.49409  | 0.173847 | 2.842106 | 0.005443 | 0.082999 | 1 |
| ENSG0000 | remission | Inflamed | GBGT1     | protein_cc | chr9  | 1.36E+08 | 1.36E+08 | - | 3708  | 292.1575 | 0        | -0.51475 | 0.181147 | -2.84159 | 0.005451 | 0.082999 | 1 |
| ENSG0000 | remission | Inflamed | FOLH1     | protein_cc | chr11 | 49168187 | 49230222 | - | 3824  | 124.5274 | 0.02148  | -1.3019  | 0.45818  | -2.84145 | 0.005453 | 0.082999 | 1 |
| ENSG0000 | remission | Inflamed | RP11-3881 | antisense  | chr16 | 31207452 | 31208284 | + | 833   | 7.408115 | 0.093079 | 0.699547 | 0.24622  | 2.841152 | 0.005458 | 0.082999 | 1 |
| ENSG0000 | remission | Inflamed | SNORA40   | snoRNA     | chr1  | 1.51E+08 | 1.51E+08 | - | 121   | 3.53222  | 0.303103 | 0.585632 | 0.206127 | 2.841127 | 0.005458 | 0.082999 | 1 |
| ENSG0000 | remission | Inflamed | ARL9      | protein_cc | chr4  | 57371509 | 57390614 | + | 1258  | 6.522673 | 0.152745 | -0.77291 | 0.272045 | -2.84111 | 0.005459 | 0.082999 | 1 |
| ENSG0000 | remission | Inflamed | EPB41L4B  | protein_cc | chr9  | 1.12E+08 | 1.12E+08 | - | 7879  | 4696.857 | 0        | 1.087436 | 0.382833 | 2.8405   | 0.005468 | 0.083099 | 1 |
| ENSG0000 | remission | Inflamed | RP11-317F | lincRNA    | chr1  | 1.83E+08 | 1.83E+08 | + | 1376  | 4.813842 | 0.207637 | -0.74398 | 0.262025 | -2.83934 | 0.005487 | 0.083329 | 1 |
| ENSG0000 | remission | Inflamed | LDLRAD2   | protein_cc | chr1  | 22138758 | 22151714 | + | 4490  | 102.9045 | 0.00716  | -0.92882 | 0.32715  | -2.83914 | 0.00549  | 0.08333  | 1 |
| ENSG0000 | remission | Inflamed | CERS6     | protein_cc | chr2  | 1.69E+08 | 1.7E+08  | + | 7238  | 3335.174 | 0        | 0.786744 | 0.277155 | 2.838645 | 0.005498 | 0.083361 | 1 |
| ENSG0000 | remission | Inflamed | UNC13D    | protein_cc | chr17 | 73823306 | 73840798 | - | 7752  | 4544.162 | 0        | -0.62823 | 0.221315 | -2.83861 | 0.005498 | 0.083361 | 1 |
| ENSG0000 | remission | Inflamed | GNE       | protein_cc | chr9  | 36214438 | 36277053 | - | 5477  | 4901.272 | 0        | 0.80178  | 0.282634 | 2.836809 | 0.005527 | 0.083749 | 1 |
| ENSG0000 | remission | Inflamed | C19orf66  | protein_cc | chr19 | 10196798 | 10203928 | + | 4341  | 1549.747 | 0        | -0.38324 | 0.135131 | -2.83606 | 0.005539 | 0.083803 | 1 |
| ENSG0000 | remission | Inflamed | MCHR1     | protein_cc | chr22 | 41074754 | 41078818 | + | 2961  | 16.53461 | 0.088305 | -0.99437 | 0.350623 | -2.83602 | 0.00554  | 0.083803 | 1 |
| ENSG0000 | remission | Inflamed | NAAA      | protein_cc | chr4  | 76831809 | 76862204 | - | 5154  | 2428.831 | 0        | 0.599368 | 0.211344 | 2.835989 | 0.00554  | 0.083803 | 1 |
| ENSG0000 | remission | Inflamed | LINC0087C | lincRNA    | chr3  | 72200408 | 72223483 | + | 2933  | 13.32458 | 0.090692 | 0.865867 | 0.305492 | 2.834337 | 0.005567 | 0.084156 | 1 |
| ENSG0000 | remission | Inflamed | C10orf10  | protein_cc | chr10 | 45466429 | 45474258 | - | 2979  | 1131.1   | 0        | -0.74128 | 0.261566 | -2.83399 | 0.005572 | 0.084192 | 1 |
| ENSG0000 | remission | Inflamed | RP11-644F | protein_cc | chr12 | 56109820 | 56118487 | + | 3510  | 210.5632 | 0        | 0.766577 | 0.270513 | 2.833789 | 0.005575 | 0.084193 | 1 |
| ENSG0000 | remission | Inflamed | RP11-284F | lincRNA    | chr1  | 1.57E+08 | 1.57E+08 | - | 3222  | 128.9165 | 0.002387 | 0.738615 | 0.260702 | 2.833181 | 0.005585 | 0.084292 | 1 |
| ENSG0000 | remission | Inflamed | CBR3-AS1  | processed  | chr21 | 37504065 | 37528615 | - | 6438  | 182.9189 | 0        | 0.782289 | 0.27624  | 2.831916 | 0.005606 | 0.084509 | 1 |
| ENSG0000 | remission | Inflamed | MADCAM1   | protein_cc | chr19 | 489176   | 505347   | + | 2441  | 733.2697 | 0        | -1.26554 | 0.44689  | -2.83188 | 0.005606 | 0.084509 | 1 |
| ENSG0000 | remission | Inflamed | SLC6A17   | protein_cc | chr1  | 1.11E+08 | 1.11E+08 | + | 6644  | 7.217184 | 0.178998 | -0.87421 | 0.308741 | -2.83152 | 0.005612 | 0.084509 | 1 |
| ENSG0000 | remission | Inflamed | GRAMD3    | protein_cc | chr5  | 1.26E+08 | 1.26E+08 | + | 5051  | 1201.594 | 0        | 0.708062 | 0.250068 | 2.831485 | 0.005613 | 0.084509 | 1 |
| ENSG0000 | remission | Inflamed | ISM1      | protein_cc | chr20 | 13202418 | 13281298 | + | 2593  | 15.57518 | 0.107399 | -1.17714 | 0.415781 | -2.83115 | 0.005618 | 0.084509 | 1 |
| ENSG0000 | remission | Inflamed | RP11-317J | antisense  | chr8  | 86354080 | 86377144 | - | 1257  | 43.29833 | 0.00716  | 0.746129 | 0.263547 | 2.831104 | 0.005619 | 0.084509 | 1 |
| ENSG0000 | remission | Inflamed | RP11-1531 | pseudoger  | chr4  | 1.55E+08 | 1.55E+08 | + | 3277  | 11.78759 | 0.317422 | -1.18995 | 0.420399 | -2.83053 | 0.005628 | 0.084597 | 1 |
| ENSG0000 | remission | Inflamed | LINC00707 | lincRNA    | chr10 | 6821560  | 6884868  | + | 3070  | 5.582339 | 0.293556 | -0.93222 | 0.329378 | -2.83024 | 0.005633 | 0.084597 | 1 |
| ENSG0000 | remission | Inflamed | FZD5      | protein_cc | chr2  | 2.09E+08 | 2.09E+08 | - | 6708  | 4736.234 | 0        | 0.839313 | 0.296593 | 2.829844 | 0.005639 | 0.084597 | 1 |
| ENSG0000 | remission | Inflamed | RP11-5281 | lincRNA    | chr3  | 1.94E+08 | 1.94E+08 | - | 984   | 100.0644 | 0.01432  | 0.979533 | 0.346147 | 2.829817 | 0.00564  | 0.084597 | 1 |
| ENSG0000 | remission | Inflamed | GPBP1L1   | protein_cc | chr1  | 46092976 | 46153785 | - | 7433  | 5520.988 | 0        | 0.516168 | 0.182407 | 2.829754 | 0.005641 | 0.084597 | 1 |
| ENSG0000 | remission | Inflamed | STX5      | protein_cc | chr11 | 62574369 | 62599560 | - | 2257  | 1647.635 | 0        | -0.208   | 0.073515 | -2.82936 | 0.005647 | 0.084644 | 1 |
| ENSG0000 | remission | Inflamed | TMEM204   | protein_cc | chr16 | 1578689  | 1605581  | + | 2047  | 522.1169 | 0        | -0.70039 | 0.247622 | -2.82847 | 0.005662 | 0.084815 | 1 |
| ENSG0000 | remission | Inflamed | IGKV1OR2  | IG_V_gene  | chr2  | 1.14E+08 | 1.14E+08 | + | 390   | 47.05251 | 0.038186 | -1.27737 | 0.451825 | -2.82714 | 0.005684 | 0.084934 | 1 |
| ENSG0000 | remission | Inflamed | GJD3      | protein_cc | chr17 | 38517235 | 38520067 | - | 1044  | 71.4463  | 0.00716  | -0.79161 | 0.280024 | -2.82694 | 0.005687 | 0.084934 | 1 |
| ENSG0000 | remission | Inflamed | AC093642  | lincRNA    | chr2  | 2.43E+08 | 2.43E+08 | + | 2854  | 117.5394 | 0.004773 | 1.184649 | 0.419062 | 2.826907 | 0.005687 | 0.084934 | 1 |
| ENSG0000 | remission | Inflamed | RP11-30P6 | lincRNA    | chr6  | 86096937 | 86099904 | - | 2513  | 194.3126 | 0.00716  | 1.15315  | 0.407921 | 2.826896 | 0.005688 | 0.084934 | 1 |



|          |           |          |           |            |       |          |          |   |       |          |          |          |          |          |          |          |   |
|----------|-----------|----------|-----------|------------|-------|----------|----------|---|-------|----------|----------|----------|----------|----------|----------|----------|---|
| ENSG0000 | remission | Inflamed | IGHV1OR1  | IG_V_gene  | chr15 | 22448382 | 22448819 | - | 353   | 131.7255 | 0        | -1.02071 | 0.361081 | -2.82683 | 0.005689 | 0.084934 | 1 |
| ENSG0000 | remission | Inflamed | GRHL2     | protein_cc | chr8  | 1.03E+08 | 1.03E+08 | + | 6060  | 1355.026 | 0.004773 | 1.033093 | 0.365464 | 2.826797 | 0.005689 | 0.084934 | 1 |
| ENSG0000 | remission | Inflamed | AIP       | protein_cc | chr11 | 67250512 | 67258574 | + | 1640  | 1141.544 | 0        | -0.35623 | 0.126055 | -2.826   | 0.005702 | 0.085082 | 1 |
| ENSG0000 | remission | Inflamed | P2RY13    | protein_cc | chr3  | 1.51E+08 | 1.51E+08 | - | 2764  | 433.2673 | 0        | -0.93358 | 0.330457 | -2.82511 | 0.005717 | 0.085253 | 1 |
| ENSG0000 | remission | Inflamed | RP11-15H1 | pseudoger  | chr19 | 23437855 | 23440741 | - | 2887  | 301.1217 | 0        | 0.585887 | 0.207402 | 2.82489  | 0.005721 | 0.085258 | 1 |
| ENSG0000 | remission | Inflamed | LRR31     | protein_cc | chr3  | 1.7E+08  | 1.7E+08  | - | 3113  | 656.4439 | 0.009547 | 1.156081 | 0.409307 | 2.824482 | 0.005727 | 0.08531  | 1 |
| ENSG0000 | remission | Inflamed | MLL3      | protein_cc | chr9  | 20341663 | 20622542 | - | 8129  | 921.2936 | 0        | 0.649997 | 0.230148 | 2.824252 | 0.005731 | 0.085318 | 1 |
| ENSG0000 | remission | Inflamed | GRIA1     | protein_cc | chr5  | 1.53E+08 | 1.53E+08 | + | 7636  | 24.35084 | 0.057279 | 1.081685 | 0.383056 | 2.823827 | 0.005738 | 0.085374 | 1 |
| ENSG0000 | remission | Inflamed | KRT80     | protein_cc | chr12 | 52562780 | 52585784 | - | 4350  | 142.3675 | 0.009547 | -1.39753 | 0.494946 | -2.82359 | 0.005742 | 0.085384 | 1 |
| ENSG0000 | remission | Inflamed | TFCP2L1   | protein_cc | chr2  | 1.22E+08 | 1.22E+08 | - | 9372  | 7500.418 | 0        | 1.02709  | 0.363803 | 2.823202 | 0.005749 | 0.085431 | 1 |
| ENSG0000 | remission | Inflamed | CYP2J2    | protein_cc | chr1  | 60358980 | 60392462 | - | 2990  | 1116.943 | 0        | 0.89538  | 0.317228 | 2.82251  | 0.00576  | 0.085523 | 1 |
| ENSG0000 | remission | Inflamed | CTC-428G2 | antisense  | chr5  | 1.15E+08 | 1.15E+08 | + | 944   | 21.40334 | 0        | 0.448742 | 0.158991 | 2.822437 | 0.005761 | 0.085523 | 1 |
| ENSG0000 | remission | Inflamed | RP11-503C | sense_intr | chr6  | 1.69E+08 | 1.69E+08 | - | 2559  | 10.9642  | 0.238663 | 0.875108 | 0.310082 | 2.822188 | 0.005765 | 0.085537 | 1 |
| ENSG0000 | remission | Inflamed | TEX14     | protein_cc | chr17 | 56634039 | 56769416 | - | 5325  | 12.05489 | 0.112172 | -0.91034 | 0.322721 | -2.82081 | 0.005788 | 0.08578  | 1 |
| ENSG0000 | remission | Inflamed | MTND2P2   | pseudoger  | chr1  | 565020   | 566063   | + | 1044  | 3678.723 | 0        | 0.66112  | 0.234395 | 2.820536 | 0.005793 | 0.08578  | 1 |
| ENSG0000 | remission | Inflamed | SCN9A     | protein_cc | chr2  | 1.67E+08 | 1.67E+08 | - | 10368 | 188.4272 | 0        | 1.023636 | 0.362923 | 2.820529 | 0.005793 | 0.08578  | 1 |
| ENSG0000 | remission | Inflamed | APOBEC3F  | protein_cc | chr22 | 39493229 | 39500072 | + | 1251  | 23.50119 | 0.011933 | -0.70415 | 0.249663 | -2.82042 | 0.005795 | 0.08578  | 1 |
| ENSG0000 | remission | Inflamed | THBD      | protein_cc | chr20 | 23026270 | 23030378 | - | 4109  | 1355.866 | 0        | -0.86074 | 0.305218 | -2.82009 | 0.0058   | 0.085803 | 1 |
| ENSG0000 | remission | Inflamed | RP4-798A1 | pseudoger  | chr1  | 1.71E+08 | 1.71E+08 | + | 232   | 6.732697 | 0.202864 | 0.727741 | 0.25807  | 2.819935 | 0.005803 | 0.085803 | 1 |
| ENSG0000 | remission | Inflamed | AC009061  | pseudoger  | chr16 | 67466595 | 67468931 | + | 2334  | 1357.131 | 0.016706 | 1.644126 | 0.583149 | 2.81939  | 0.005812 | 0.08589  | 1 |
| ENSG0000 | remission | Inflamed | TGM2      | protein_cc | chr20 | 36756863 | 36794980 | - | 6962  | 11936.68 | 0        | -0.95063 | 0.33723  | -2.81893 | 0.00582  | 0.085956 | 1 |
| ENSG0000 | remission | Inflamed | AC026904  | lincRNA    | chr8  | 49502961 | 49507181 | + | 3549  | 1.107399 | 0.73031  | 0.421365 | 0.149519 | 2.818127 | 0.005833 | 0.086106 | 1 |
| ENSG0000 | remission | Inflamed | FAM110C   | protein_cc | chr2  | 38814    | 46870    | - | 3968  | 873.3317 | 0        | 0.870455 | 0.308906 | 2.817865 | 0.005838 | 0.086123 | 1 |
| ENSG0000 | remission | Inflamed | MTATP8P2  | pseudoger  | chr2  | 88124461 | 88124662 | + | 202   | 22.8401  | 0.047733 | 0.736994 | 0.26157  | 2.817573 | 0.005842 | 0.08614  | 1 |
| ENSG0000 | remission | Inflamed | MICALCL   | protein_cc | chr11 | 12297627 | 12380691 | + | 3448  | 334.611  | 0.009547 | 0.889935 | 0.31587  | 2.817406 | 0.005845 | 0.08614  | 1 |
| ENSG0000 | remission | Inflamed | RP11-507K | antisense  | chr14 | 89017941 | 89018837 | + | 718   | 6.431981 | 0.109785 | 0.597504 | 0.212158 | 2.816311 | 0.005864 | 0.086307 | 1 |
| ENSG0000 | remission | Inflamed | ZNF571-A5 | antisense  | chr19 | 38039816 | 38078249 | + | 4560  | 17.57041 | 0.038186 | 0.712098 | 0.25287  | 2.816071 | 0.005868 | 0.086307 | 1 |
| ENSG0000 | remission | Inflamed | POU5F1B   | protein_cc | chr8  | 1.28E+08 | 1.28E+08 | + | 5357  | 9.797136 | 0.078759 | 0.756848 | 0.268765 | 2.816016 | 0.005869 | 0.086307 | 1 |
| ENSG0000 | remission | Inflamed | IFI6      | protein_cc | chr1  | 27992572 | 27998729 | - | 865   | 1111.764 | 0        | -0.70533 | 0.250507 | -2.81562 | 0.005875 | 0.086307 | 1 |
| ENSG0000 | remission | Inflamed | BHLHE40   | protein_cc | chr3  | 5020801  | 5027008  | + | 3837  | 5131.451 | 0        | -0.53624 | 0.190502 | -2.8149  | 0.005888 | 0.086307 | 1 |
| ENSG0000 | remission | Inflamed | NEURL     | protein_cc | chr10 | 1.05E+08 | 1.05E+08 | + | 4961  | 1625.189 | 0        | 1.000556 | 0.355455 | 2.814857 | 0.005888 | 0.086307 | 1 |
| ENSG0000 | remission | Inflamed | AC012507  | antisense  | chr2  | 2.32E+08 | 2.32E+08 | + | 2265  | 6.677804 | 0.181384 | 0.759306 | 0.269752 | 2.814829 | 0.005889 | 0.086307 | 1 |
| ENSG0000 | remission | Inflamed | FAM183A   | protein_cc | chr1  | 43610824 | 43622067 | + | 843   | 4.147971 | 0.379475 | 0.708119 | 0.251581 | 2.814679 | 0.005891 | 0.086307 | 1 |
| ENSG0000 | remission | Inflamed | DACT2     | protein_cc | chr6  | 1.69E+08 | 1.69E+08 | - | 4223  | 93.19809 | 0.026253 | 1.281329 | 0.455255 | 2.814533 | 0.005894 | 0.086307 | 1 |
| ENSG0000 | remission | Inflamed | COBL      | protein_cc | chr7  | 51083909 | 51384515 | - | 14304 | 2722.737 | 0        | 0.796452 | 0.282982 | 2.814492 | 0.005895 | 0.086307 | 1 |
| ENSG0000 | remission | Inflamed | RP11-511E | antisense  | chr12 | 93397191 | 93609455 | - | 1914  | 3.615752 | 0.310263 | 0.582611 | 0.207009 | 2.814418 | 0.005896 | 0.086307 | 1 |
| ENSG0000 | remission | Inflamed | ANO2      | protein_cc | chr12 | 5641035  | 6055398  | - | 6012  | 37.40334 | 0.002387 | -0.67078 | 0.238339 | -2.8144  | 0.005896 | 0.086307 | 1 |
| ENSG0000 | remission | Inflamed | SRPX2     | protein_cc | chrX  | 99899215 | 99926296 | + | 2368  | 310.2411 | 0        | -0.82196 | 0.292093 | -2.81404 | 0.005902 | 0.08635  | 1 |
| ENSG0000 | remission | Inflamed | RP11-134F | lincRNA    | chr1  | 2.03E+08 | 2.03E+08 | - | 2725  | 6.632458 | 0.231504 | -0.78617 | 0.279475 | -2.81303 | 0.005919 | 0.086488 | 1 |
| ENSG0000 | remission | Inflamed | KCNE1L    | protein_cc | chrX  | 1.09E+08 | 1.09E+08 | - | 1465  | 7.622912 | 0.274463 | -1.00504 | 0.357292 | -2.81294 | 0.005921 | 0.086488 | 1 |

|          |           |          |           |            |       |          |          |   |       |          |          |          |          |          |          |          |   |
|----------|-----------|----------|-----------|------------|-------|----------|----------|---|-------|----------|----------|----------|----------|----------|----------|----------|---|
| ENSG0000 | remission | Inflamed | TAPSAR1   | lincRNA    | chr6  | 32811863 | 32814272 | + | 1951  | 681.4726 | 0        | -0.50053 | 0.17794  | -2.8129  | 0.005922 | 0.086488 | 1 |
| ENSG0000 | remission | Inflamed | TMED1     | protein_cc | chr19 | 10943114 | 10946994 | - | 1513  | 436.9093 | 0        | -0.32519 | 0.115622 | -2.81254 | 0.005928 | 0.08653  | 1 |
| ENSG0000 | remission | Inflamed | RP11-493L | lincRNA    | chr12 | 47641907 | 47651322 | + | 510   | 7.116945 | 0.162291 | -0.79868 | 0.284002 | -2.81223 | 0.005933 | 0.086559 | 1 |
| ENSG0000 | remission | Inflamed | RAB11FIP1 | protein_cc | chr8  | 37716136 | 37756985 | - | 9602  | 10277.99 | 0        | 0.581045 | 0.206632 | 2.811974 | 0.005937 | 0.086574 | 1 |
| ENSG0000 | remission | Inflamed | SH3YL1    | protein_cc | chr2  | 217730   | 266398   | - | 11165 | 1529.854 | 0        | 0.664592 | 0.236361 | 2.811767 | 0.005941 | 0.086578 | 1 |
| ENSG0000 | remission | Inflamed | HAS2-AS1  | antisense  | chr8  | 1.23E+08 | 1.23E+08 | + | 1796  | 12.46539 | 0.064439 | 0.763562 | 0.271624 | 2.811099 | 0.005952 | 0.086696 | 1 |
| ENSG0000 | remission | Inflamed | WFDC3     | protein_cc | chr20 | 44376583 | 44420571 | - | 2405  | 30.52029 | 0.01432  | 0.774365 | 0.275497 | 2.810795 | 0.005958 | 0.086714 | 1 |
| ENSG0000 | remission | Inflamed | EVPLL     | protein_cc | chr17 | 18280976 | 18292961 | + | 2156  | 10.31265 | 0.138425 | 0.82125  | 0.292193 | 2.810644 | 0.00596  | 0.086714 | 1 |
| ENSG0000 | remission | Inflamed | SFTA2     | protein_cc | chr6  | 30899130 | 30899952 | - | 691   | 3.868735 | 0.575179 | -0.8945  | 0.318301 | -2.81024 | 0.005967 | 0.08675  | 1 |
| ENSG0000 | remission | Inflamed | CTD-2126f | antisense  | chr19 | 50546453 | 50554319 | - | 711   | 3.379475 | 0.336516 | 0.645201 | 0.229611 | 2.809973 | 0.005972 | 0.08675  | 1 |
| ENSG0000 | remission | Inflamed | PRR16     | protein_cc | chr5  | 1.2E+08  | 1.2E+08  | + | 2281  | 268.568  | 0        | -0.82059 | 0.292034 | -2.80992 | 0.005973 | 0.08675  | 1 |
| ENSG0000 | remission | Inflamed | LYSMD4    | protein_cc | chr15 | 1E+08    | 1E+08    | - | 5691  | 406.0525 | 0        | 0.420467 | 0.149664 | 2.8094   | 0.005981 | 0.08681  | 1 |
| ENSG0000 | remission | Inflamed | RP11-1105 | antisense  | chr12 | 94665926 | 94670971 | - | 493   | 2.002387 | 0.520286 | 0.527886 | 0.187907 | 2.809295 | 0.005983 | 0.08681  | 1 |
| ENSG0000 | remission | Inflamed | SYTL4     | protein_cc | chrX  | 99929488 | 99987110 | - | 7518  | 891.0764 | 0        | 0.785533 | 0.279722 | 2.808265 | 0.006001 | 0.08702  | 1 |
| ENSG0000 | remission | Inflamed | LINC00847 | lincRNA    | chr5  | 1.8E+08  | 1.8E+08  | + | 2453  | 550.6086 | 0        | -0.34694 | 0.123589 | -2.80719 | 0.00602  | 0.087194 | 1 |
| ENSG0000 | remission | Inflamed | DUOX2     | protein_cc | chr15 | 45384848 | 45406542 | - | 9834  | 52840.97 | 0        | -1.76709 | 0.629488 | -2.80719 | 0.00602  | 0.087194 | 1 |
| ENSG0000 | remission | Inflamed | RHOXF1    | protein_cc | chrX  | 1.19E+08 | 1.19E+08 | - | 769   | 3.463007 | 0.362768 | 0.626808 | 0.223324 | 2.806724 | 0.006028 | 0.087249 | 1 |
| ENSG0000 | remission | Inflamed | LY6K      | protein_cc | chr8  | 1.44E+08 | 1.44E+08 | + | 4049  | 13.64439 | 0.085919 | -1.05979 | 0.377607 | -2.80658 | 0.00603  | 0.087249 | 1 |
| ENSG0000 | remission | Inflamed | PTRH1     | protein_cc | chr9  | 1.3E+08  | 1.3E+08  | - | 3595  | 243.0573 | 0        | -0.40319 | 0.143683 | -2.8061  | 0.006038 | 0.087321 | 1 |
| ENSG0000 | remission | Inflamed | CXCL17    | protein_cc | chr19 | 42932440 | 42947200 | - | 1189  | 26.36277 | 0.336516 | -1.64103 | 0.58488  | -2.80575 | 0.006045 | 0.087361 | 1 |
| ENSG0000 | remission | Inflamed | ZBED2     | protein_cc | chr3  | 1.11E+08 | 1.11E+08 | - | 2311  | 41.57757 | 0.136038 | -1.38717 | 0.494561 | -2.80486 | 0.00606  | 0.087536 | 1 |
| ENSG0000 | remission | Inflamed | GJD4      | protein_cc | chr10 | 35894338 | 35897863 | + | 1580  | 1.031026 | 0.742243 | 0.3937   | 0.140385 | 2.804431 | 0.006067 | 0.087596 | 1 |
| ENSG0000 | remission | Inflamed | 03-Sep    | protein_cc | chr22 | 42372276 | 42394225 | + | 5427  | 63.66587 | 0.00716  | -0.76493 | 0.272787 | -2.80411 | 0.006073 | 0.087629 | 1 |
| ENSG0000 | remission | Inflamed | DUSP7     | protein_cc | chr3  | 52082935 | 52090566 | - | 5648  | 1340.737 | 0        | -0.50248 | 0.179233 | -2.80348 | 0.006084 | 0.087739 | 1 |
| ENSG0000 | remission | Inflamed | SLC46A2   | protein_cc | chr9  | 1.16E+08 | 1.16E+08 | - | 2502  | 9.50358  | 0.169451 | -0.85464 | 0.304897 | -2.80304 | 0.006092 | 0.087786 | 1 |
| ENSG0000 | remission | Inflamed | CTA-929Cf | lincRNA    | chr22 | 27706612 | 27713417 | + | 5052  | 3.202864 | 0.494033 | 0.626733 | 0.223619 | 2.802679 | 0.006098 | 0.087786 | 1 |
| ENSG0000 | remission | Inflamed | PBLD      | protein_cc | chr10 | 70042417 | 70092806 | - | 5172  | 1321.263 | 0        | 1.069315 | 0.38156  | 2.802479 | 0.006101 | 0.087786 | 1 |
| ENSG0000 | remission | Inflamed | TUBB3     | protein_cc | chr16 | 89987800 | 90005169 | + | 6138  | 35.39379 | 0.019093 | -0.96221 | 0.343344 | -2.80245 | 0.006102 | 0.087786 | 1 |
| ENSG0000 | remission | Inflamed | RP11-457M | lincRNA    | chr6  | 26686469 | 26688192 | + | 1724  | 28.88783 | 0.02864  | 0.945942 | 0.337563 | 2.802273 | 0.006105 | 0.087786 | 1 |
| ENSG0000 | remission | Inflamed | TUBB1     | protein_cc | chr20 | 57594309 | 57601709 | + | 3496  | 3.840095 | 0.357995 | 0.637353 | 0.227477 | 2.801837 | 0.006113 | 0.087786 | 1 |
| ENSG0000 | remission | Inflamed | IGHV1-12  | IG_V_pseu  | chr14 | 1.07E+08 | 1.07E+08 | - | 205   | 28.04773 | 0.150358 | -1.04564 | 0.37324  | -2.80154 | 0.006118 | 0.087786 | 1 |
| ENSG0000 | remission | Inflamed | ALDH4A1   | protein_cc | chr1  | 19197926 | 19229275 | - | 3687  | 422.2697 | 0        | -0.43703 | 0.155999 | -2.8015  | 0.006119 | 0.087786 | 1 |
| ENSG0000 | remission | Inflamed | ZNF311    | protein_cc | chr6  | 28962562 | 28973093 | - | 3176  | 70.45823 | 0        | 0.736447 | 0.262878 | 2.801483 | 0.006119 | 0.087786 | 1 |
| ENSG0000 | remission | Inflamed | RPS15AP6  | pseudoger  | chr1  | 21330043 | 21330427 | - | 385   | 0.811456 | 0.792363 | 0.409048 | 0.146016 | 2.801387 | 0.006121 | 0.087786 | 1 |
| ENSG0000 | remission | Inflamed | RSL24D1P  | pseudoger  | chr6  | 27748398 | 27748890 | - | 493   | 0.825776 | 0.775656 | 0.332259 | 0.118625 | 2.800913 | 0.006129 | 0.08783  | 1 |
| ENSG0000 | remission | Inflamed | CHKB-AS1  | antisense  | chr22 | 51021455 | 51022306 | + | 578   | 16.21718 | 0.004773 | -0.51885 | 0.185247 | -2.80083 | 0.00613  | 0.08783  | 1 |
| ENSG0000 | remission | Inflamed | TMEM206   | protein_cc | chr1  | 2.13E+08 | 2.13E+08 | - | 2914  | 159.3604 | 0        | -0.49102 | 0.175376 | -2.79983 | 0.006148 | 0.088035 | 1 |
| ENSG0000 | remission | Inflamed | COPE      | protein_cc | chr19 | 19010323 | 19030206 | - | 2885  | 4515.654 | 0        | -0.29542 | 0.105529 | -2.79944 | 0.006155 | 0.088086 | 1 |
| ENSG0000 | remission | Inflamed | USB1      | protein_cc | chr16 | 58033450 | 58055522 | + | 7298  | 2823.955 | 0        | -0.2833  | 0.101209 | -2.79917 | 0.00616  | 0.088106 | 1 |
| ENSG0000 | remission | Inflamed | ST6GALNA  | protein_cc | chr9  | 1.31E+08 | 1.31E+08 | - | 5309  | 9264.091 | 0        | 0.796849 | 0.284698 | 2.798931 | 0.006164 | 0.088118 | 1 |

|          |           |          |           |                  |          |          |   |       |          |          |          |          |          |          |          |   |
|----------|-----------|----------|-----------|------------------|----------|----------|---|-------|----------|----------|----------|----------|----------|----------|----------|---|
| ENSG0000 | remission | Inflamed | ZMAT5     | protein_cc chr22 | 30126945 | 30163000 | - | 3315  | 328.9475 | 0        | -0.3767  | 0.134616 | -2.79831 | 0.006175 | 0.088144 | 1 |
| ENSG0000 | remission | Inflamed | GUCY2D    | protein_cc chr17 | 7905912  | 7923657  | + | 4040  | 13.40334 | 0.045346 | -0.79753 | 0.285006 | -2.7983  | 0.006175 | 0.088144 | 1 |
| ENSG0000 | remission | Inflamed | IGSF5     | protein_cc chr21 | 41117334 | 41174023 | + | 2650  | 6.011933 | 0.312649 | 0.939524 | 0.335763 | 2.798178 | 0.006177 | 0.088144 | 1 |
| ENSG0000 | remission | Inflamed | GVQW1     | protein_cc chr9  | 32566787 | 32568619 | + | 1833  | 19.89737 | 0.01432  | -0.37229 | 0.133053 | -2.79807 | 0.006179 | 0.088144 | 1 |
| ENSG0000 | remission | Inflamed | SYT12     | protein_cc chr11 | 66774249 | 66818334 | + | 10830 | 134.222  | 0.019093 | -1.41008 | 0.504025 | -2.79764 | 0.006187 | 0.088194 | 1 |
| ENSG0000 | remission | Inflamed | ZNF888    | lincRNA chr19    | 53418449 | 53426723 | - | 551   | 33.72792 | 0.02864  | 0.870228 | 0.311095 | 2.797308 | 0.006193 | 0.088194 | 1 |
| ENSG0000 | remission | Inflamed | SLC6A12   | protein_cc chr12 | 299243   | 323736   | - | 5683  | 123.6158 | 0.00716  | 0.776887 | 0.277757 | 2.797001 | 0.006198 | 0.088194 | 1 |
| ENSG0000 | remission | Inflamed | CCL7      | protein_cc chr17 | 32597240 | 32599261 | + | 863   | 20.13604 | 0.0358   | -0.84465 | 0.302016 | -2.79671 | 0.006203 | 0.088194 | 1 |
| ENSG0000 | remission | Inflamed | NEO1      | protein_cc chr15 | 73344051 | 73597547 | + | 8117  | 9096.487 | 0        | 0.690971 | 0.247079 | 2.796563 | 0.006206 | 0.088194 | 1 |
| ENSG0000 | remission | Inflamed | NXPE1     | protein_cc chr11 | 1.14E+08 | 1.14E+08 | - | 4317  | 2923.804 | 0.004773 | 1.707429 | 0.610568 | 2.79646  | 0.006208 | 0.088194 | 1 |
| ENSG0000 | remission | Inflamed | C17orf107 | protein_cc chr17 | 4802713  | 4806227  | + | 3408  | 181.6539 | 0        | -0.61949 | 0.221539 | -2.79629 | 0.006211 | 0.088194 | 1 |
| ENSG0000 | remission | Inflamed | WIPF3     | protein_cc chr7  | 29846102 | 29956682 | + | 6065  | 55.17661 | 0.009547 | 0.922526 | 0.329923 | 2.796188 | 0.006213 | 0.088194 | 1 |
| ENSG0000 | remission | Inflamed | MAN2B1    | protein_cc chr19 | 12757325 | 12777556 | - | 5374  | 6293.907 | 0        | -0.40828 | 0.146014 | -2.79617 | 0.006213 | 0.088194 | 1 |
| ENSG0000 | remission | Inflamed | IGKV6D-21 | IG_V_gene chr2   | 90060377 | 90060995 | + | 409   | 393.3699 | 0.004773 | -1.39473 | 0.498872 | -2.79577 | 0.00622  | 0.088247 | 1 |
| ENSG0000 | remission | Inflamed | HTR4-IT1  | sense_intr chr5  | 1.48E+08 | 1.48E+08 | - | 1704  | 1.947494 | 0.587112 | 0.6163   | 0.220507 | 2.794925 | 0.006235 | 0.088414 | 1 |
| ENSG0000 | remission | Inflamed | TMEM88    | protein_cc chr17 | 7758383  | 7759417  | + | 875   | 95.45346 | 0        | -0.50596 | 0.181064 | -2.7944  | 0.006244 | 0.088455 | 1 |
| ENSG0000 | remission | Inflamed | ISX       | protein_cc chr22 | 35462129 | 35483380 | + | 3384  | 2751.062 | 0.004773 | 1.588435 | 0.568439 | 2.794383 | 0.006245 | 0.088455 | 1 |
| ENSG0000 | remission | Inflamed | CDH16     | protein_cc chr16 | 66942025 | 66952887 | - | 3656  | 16.66826 | 0.100239 | 1.134195 | 0.405936 | 2.794022 | 0.006251 | 0.088499 | 1 |
| ENSG0000 | remission | Inflamed | RGS11     | protein_cc chr16 | 318300   | 325980   | - | 4798  | 170.7542 | 0.004773 | 0.846974 | 0.303185 | 2.793591 | 0.006259 | 0.08851  | 1 |
| ENSG0000 | remission | Inflamed | CTD-2287C | lincRNA chr5     | 1.15E+08 | 1.15E+08 | - | 461   | 0.947494 | 0.735084 | 0.397492 | 0.142293 | 2.793486 | 0.006261 | 0.08851  | 1 |
| ENSG0000 | remission | Inflamed | AC091878  | antisense chr5   | 17130137 | 17217156 | - | 2941  | 3.138425 | 0.513126 | -0.74155 | 0.265478 | -2.79325 | 0.006265 | 0.08851  | 1 |
| ENSG0000 | remission | Inflamed | PIK3R5    | protein_cc chr17 | 8782233  | 8869029  | - | 7501  | 1174.119 | 0        | -0.71226 | 0.254994 | -2.79323 | 0.006265 | 0.08851  | 1 |
| ENSG0000 | remission | Inflamed | FICD      | protein_cc chr12 | 1.09E+08 | 1.09E+08 | + | 4267  | 571.0072 | 0        | -0.55608 | 0.199115 | -2.79277 | 0.006274 | 0.088579 | 1 |
| ENSG0000 | remission | Inflamed | RP4-798A1 | lincRNA chr1     | 16841140 | 16842249 | + | 1110  | 5.090692 | 0.224344 | 0.696659 | 0.249474 | 2.792507 | 0.006278 | 0.088598 | 1 |
| ENSG0000 | remission | Inflamed | C15orf38  | protein_cc chr15 | 90443159 | 90456188 | - | 3673  | 1339.384 | 0        | 0.427434 | 0.153094 | 2.791967 | 0.006288 | 0.088687 | 1 |
| ENSG0000 | remission | Inflamed | HAMP      | protein_cc chr19 | 35771619 | 35776046 | + | 3010  | 9.868735 | 0.186158 | -0.99449 | 0.356261 | -2.79147 | 0.006297 | 0.088756 | 1 |
| ENSG0000 | remission | Inflamed | RP11-395I | lincRNA chr8     | 25283037 | 25284096 | - | 528   | 15.52745 | 0.088305 | 0.923799 | 0.330954 | 2.791319 | 0.0063   | 0.088756 | 1 |
| ENSG0000 | remission | Inflamed | LMO2      | protein_cc chr11 | 33880122 | 33913836 | - | 3109  | 576.3365 | 0        | -0.65192 | 0.233585 | -2.79095 | 0.006306 | 0.088802 | 1 |
| ENSG0000 | remission | Inflamed | TRPM4     | protein_cc chr19 | 49660998 | 49715093 | + | 6604  | 8946.905 | 0        | 0.615662 | 0.220632 | 2.790448 | 0.006315 | 0.088862 | 1 |
| ENSG0000 | remission | Inflamed | TBX4      | protein_cc chr17 | 59529765 | 59562471 | + | 3996  | 1.792363 | 0.582339 | 0.61205  | 0.219346 | 2.790341 | 0.006317 | 0.088862 | 1 |
| ENSG0000 | remission | Inflamed | RP11-61A1 | antisense chr16  | 66875336 | 66887351 | - | 434   | 11.79236 | 0.062053 | 0.691681 | 0.248054 | 2.788432 | 0.006352 | 0.089301 | 1 |
| ENSG0000 | remission | Inflamed | MAP7D1    | protein_cc chr1  | 36621180 | 36646450 | + | 5271  | 3890.9   | 0        | -0.4754  | 0.170541 | -2.78759 | 0.006367 | 0.089469 | 1 |
| ENSG0000 | remission | Inflamed | IKBIP     | protein_cc chr12 | 99007183 | 99038891 | - | 4163  | 376.0167 | 0        | -0.74798 | 0.268375 | -2.78707 | 0.006377 | 0.089508 | 1 |
| ENSG0000 | remission | Inflamed | SEC14L2   | protein_cc chr22 | 30792846 | 30821305 | + | 5984  | 215.2411 | 0        | -0.75756 | 0.271815 | -2.78706 | 0.006377 | 0.089508 | 1 |
| ENSG0000 | remission | Inflamed | CCL2      | protein_cc chr17 | 32582304 | 32584222 | + | 1137  | 1229.821 | 0        | -1.01083 | 0.36278  | -2.78635 | 0.00639  | 0.08963  | 1 |
| ENSG0000 | remission | Inflamed | PNPLA7    | protein_cc chr9  | 1.4E+08  | 1.4E+08  | - | 8971  | 673.8234 | 0        | 0.645006 | 0.231499 | 2.78621  | 0.006392 | 0.08963  | 1 |
| ENSG0000 | remission | Inflamed | LGSN      | protein_cc chr6  | 63985856 | 64029882 | - | 5634  | 14.31026 | 0.334129 | 1.32561  | 0.475841 | 2.785823 | 0.006399 | 0.089681 | 1 |
| ENSG0000 | remission | Inflamed | C1orf226  | protein_cc chr1  | 1.62E+08 | 1.62E+08 | + | 4487  | 1371.635 | 0        | 0.68096  | 0.244496 | 2.785157 | 0.006412 | 0.089804 | 1 |
| ENSG0000 | remission | Inflamed | IGKV1D-13 | IG_V_gene chr2   | 90192768 | 90193424 | + | 531   | 1949.895 | 0.004773 | -1.54665 | 0.555418 | -2.78466 | 0.006421 | 0.089883 | 1 |
| ENSG0000 | remission | Inflamed | AP000695  | antisense chr21  | 37818029 | 37904706 | + | 1178  | 3.832936 | 0.400955 | -0.76096 | 0.273287 | -2.78446 | 0.006424 | 0.089886 | 1 |

|          |           |          |           |            |       |          |          |   |       |          |          |          |          |          |          |          |   |
|----------|-----------|----------|-----------|------------|-------|----------|----------|---|-------|----------|----------|----------|----------|----------|----------|----------|---|
| ENSG0000 | remission | Inflamed | CTBP2P4   | pseudoger  | chr5  | 97912045 | 97912964 | + | 920   | 3.023866 | 0.295943 | 0.545423 | 0.195901 | 2.784171 | 0.00643  | 0.089914 | 1 |
| ENSG0000 | remission | Inflamed | XXyac-YRM | pseudoger  | chr9  | 14511    | 29739    | - | 2216  | 322.7112 | 0        | 0.427086 | 0.153426 | 2.783666 | 0.006439 | 0.089996 | 1 |
| ENSG0000 | remission | Inflamed | C11orf24  | protein_cc | chr11 | 68028803 | 68039469 | - | 3406  | 3195.778 | 0        | -0.23182 | 0.083289 | -2.78327 | 0.006446 | 0.090019 | 1 |
| ENSG0000 | remission | Inflamed | MSANTD1   | protein_cc | chr4  | 3246096  | 3273465  | + | 7553  | 18.38425 | 0.009547 | 0.610712 | 0.219428 | 2.783201 | 0.006448 | 0.090019 | 1 |
| ENSG0000 | remission | Inflamed | CYP4F24P  | pseudoger  | chr19 | 15871051 | 15890719 | - | 1580  | 19.99284 | 0.231504 | 0.979358 | 0.351937 | 2.782761 | 0.006456 | 0.090045 | 1 |
| ENSG0000 | remission | Inflamed | NXPE2     | protein_cc | chr11 | 1.15E+08 | 1.15E+08 | + | 3126  | 275.778  | 0.004773 | 1.263218 | 0.453949 | 2.782728 | 0.006456 | 0.090045 | 1 |
| ENSG0000 | remission | Inflamed | RP4-575N6 | antisense  | chr1  | 1.02E+08 | 1.02E+08 | - | 403   | 4.131265 | 0.295943 | -0.71013 | 0.255211 | -2.78251 | 0.00646  | 0.090054 | 1 |
| ENSG0000 | remission | Inflamed | MACROD2   | protein_cc | chr20 | 13976015 | 16033842 | + | 11342 | 50.6253  | 0.019093 | 0.872878 | 0.313849 | 2.781207 | 0.006484 | 0.090281 | 1 |
| ENSG0000 | remission | Inflamed | SH3BGRL2  | protein_cc | chr6  | 80341000 | 80413372 | + | 4649  | 4317.396 | 0        | 0.930929 | 0.334729 | 2.781143 | 0.006486 | 0.090281 | 1 |
| ENSG0000 | remission | Inflamed | RP11-449L | lincRNA    | chr18 | 22305745 | 22509040 | + | 908   | 3.398568 | 0.386635 | 0.652243 | 0.234537 | 2.780978 | 0.006489 | 0.090281 | 1 |
| ENSG0000 | remission | Inflamed | TACC2     | protein_cc | chr10 | 1.24E+08 | 1.24E+08 | + | 18835 | 4073.998 | 0        | 0.613373 | 0.220569 | 2.780871 | 0.006491 | 0.090281 | 1 |
| ENSG0000 | remission | Inflamed | RP11-789C | lincRNA    | chr4  | 1.71E+08 | 1.71E+08 | + | 429   | 4.563246 | 0.501193 | 0.725383 | 0.260863 | 2.7807   | 0.006494 | 0.090281 | 1 |
| ENSG0000 | remission | Inflamed | WAS       | protein_cc | chrX  | 48534985 | 48549818 | + | 2381  | 1175.014 | 0        | -0.78295 | 0.281707 | -2.77932 | 0.006519 | 0.09059  | 1 |
| ENSG0000 | remission | Inflamed | SRSF8     | pseudoger  | chr11 | 94800056 | 94804388 | + | 4331  | 583.3437 | 0        | 0.521996 | 0.187833 | 2.779036 | 0.006525 | 0.090614 | 1 |
| ENSG0000 | remission | Inflamed | SEMA6A    | protein_cc | chr5  | 1.16E+08 | 1.16E+08 | - | 10956 | 3187.513 | 0        | 0.889832 | 0.320257 | 2.778496 | 0.006535 | 0.090686 | 1 |
| ENSG0000 | remission | Inflamed | TLR2      | protein_cc | chr4  | 1.55E+08 | 1.55E+08 | + | 4200  | 442.6611 | 0        | -1.0911  | 0.392735 | -2.77821 | 0.00654  | 0.090686 | 1 |
| ENSG0000 | remission | Inflamed | GLTP      | protein_cc | chr12 | 1.1E+08  | 1.1E+08  | - | 2696  | 2408.749 | 0        | 0.410875 | 0.147902 | 2.778029 | 0.006543 | 0.090686 | 1 |
| ENSG0000 | remission | Inflamed | IGLV2-5   | IG_V_pseu  | chr22 | 23198937 | 23199213 | + | 277   | 66.26253 | 0.009547 | -1.1596  | 0.417433 | -2.77792 | 0.006545 | 0.090686 | 1 |
| ENSG0000 | remission | Inflamed | EDN3      | protein_cc | chr20 | 57875482 | 57901047 | + | 2675  | 1538.492 | 0.004773 | 1.189196 | 0.428102 | 2.777832 | 0.006547 | 0.090686 | 1 |
| ENSG0000 | remission | Inflamed | RP11-484I | processed  | chr11 | 43411833 | 43417045 | + | 183   | 2.112172 | 0.446301 | 0.557546 | 0.200761 | 2.777163 | 0.00656  | 0.090749 | 1 |
| ENSG0000 | remission | Inflamed | CNGA1     | protein_cc | chr4  | 47937994 | 48018689 | - | 3581  | 82.36754 | 0.011933 | 0.991247 | 0.356938 | 2.777086 | 0.006561 | 0.090749 | 1 |
| ENSG0000 | remission | Inflamed | PDGFD     | protein_cc | chr11 | 1.04E+08 | 1.04E+08 | - | 4266  | 462.5919 | 0.002387 | 0.858594 | 0.309196 | 2.776864 | 0.006565 | 0.090749 | 1 |
| ENSG0000 | remission | Inflamed | PGF       | protein_cc | chr14 | 75408537 | 75422487 | - | 5962  | 328.2267 | 0        | -0.94933 | 0.341873 | -2.77685 | 0.006565 | 0.090749 | 1 |
| ENSG0000 | remission | Inflamed | ACOXL     | protein_cc | chr2  | 1.11E+08 | 1.12E+08 | + | 5747  | 50.00955 | 0.004773 | -0.95071 | 0.34242  | -2.77643 | 0.006573 | 0.090809 | 1 |
| ENSG0000 | remission | Inflamed | ERBB3     | protein_cc | chr12 | 56473641 | 56497289 | + | 8651  | 11497.56 | 0        | 0.877388 | 0.316033 | 2.776252 | 0.006577 | 0.090809 | 1 |
| ENSG0000 | remission | Inflamed | LINC00526 | lincRNA    | chr18 | 5236723  | 5238597  | - | 1875  | 183.3986 | 0        | 0.528616 | 0.190489 | 2.775047 | 0.006599 | 0.091073 | 1 |
| ENSG0000 | remission | Inflamed | DPP7      | protein_cc | chr9  | 1.4E+08  | 1.4E+08  | - | 2820  | 3208.95  | 0        | -0.54141 | 0.195132 | -2.77456 | 0.006608 | 0.091151 | 1 |
| ENSG0000 | remission | Inflamed | RP11-429J | lincRNA    | chr8  | 1.45E+08 | 1.45E+08 | - | 1809  | 2.178998 | 0.508353 | 0.659899 | 0.237873 | 2.774169 | 0.006616 | 0.091206 | 1 |
| ENSG0000 | remission | Inflamed | RP11-15N7 | sense_ove  | chr3  | 99898411 | 99900574 | + | 2164  | 4.50358  | 0.217184 | 0.692466 | 0.249656 | 2.773677 | 0.006625 | 0.091286 | 1 |
| ENSG0000 | remission | Inflamed | ARHGAP36  | protein_cc | chrX  | 1.3E+08  | 1.3E+08  | + | 3173  | 3.658711 | 0.498807 | 0.673099 | 0.242744 | 2.77288  | 0.00664  | 0.091445 | 1 |
| ENSG0000 | remission | Inflamed | AC007292  | antisense  | chr19 | 4363786  | 4364637  | + | 746   | 35.2315  | 0.00716  | 0.565677 | 0.204081 | 2.77182  | 0.00666  | 0.091674 | 1 |
| ENSG0000 | remission | Inflamed | ACOX1     | protein_cc | chr17 | 73937588 | 73975515 | - | 8543  | 5789.78  | 0        | 0.636577 | 0.229676 | 2.771629 | 0.006664 | 0.091675 | 1 |
| ENSG0000 | remission | Inflamed | RP11-96D1 | antisense  | chr16 | 68259872 | 68263048 | - | 3177  | 741.6587 | 0        | 0.966999 | 0.348987 | 2.770877 | 0.006678 | 0.091807 | 1 |
| ENSG0000 | remission | Inflamed | GCOM1     | protein_cc | chr15 | 57884106 | 58006943 | + | 7597  | 42.33174 | 0.031026 | 0.90058  | 0.325031 | 2.770751 | 0.00668  | 0.091807 | 1 |
| ENSG0000 | remission | Inflamed | APOC1     | protein_cc | chr19 | 45417504 | 45422606 | + | 1231  | 515.2243 | 0        | -0.83862 | 0.302688 | -2.77057 | 0.006684 | 0.091807 | 1 |
| ENSG0000 | remission | Inflamed | CXCL11    | protein_cc | chr4  | 76954835 | 76962568 | - | 1908  | 273.6396 | 0.031026 | -1.62687 | 0.587282 | -2.77016 | 0.006692 | 0.091853 | 1 |
| ENSG0000 | remission | Inflamed | IGLV5-45  | IG_V_gene  | chr22 | 22730355 | 22730874 | + | 397   | 1427.527 | 0        | -1.28407 | 0.463561 | -2.77    | 0.006695 | 0.091853 | 1 |
| ENSG0000 | remission | Inflamed | TRMT112   | protein_cc | chr11 | 64083932 | 64085556 | - | 1625  | 1296.881 | 0        | -0.46495 | 0.167869 | -2.76975 | 0.0067   | 0.091853 | 1 |
| ENSG0000 | remission | Inflamed | RP11-845C | sense_intr | chr18 | 56038798 | 56039898 | + | 1101  | 2.816229 | 0.439141 | 0.647858 | 0.233925 | 2.769507 | 0.006704 | 0.091853 | 1 |
| ENSG0000 | remission | Inflamed | SGK223    | protein_cc | chr8  | 8175258  | 8244008  | - | 4892  | 1724.205 | 0        | 0.683061 | 0.246639 | 2.769481 | 0.006705 | 0.091853 | 1 |

|          |           |          |           |                  |          |          |   |       |          |          |          |          |          |          |          |   |
|----------|-----------|----------|-----------|------------------|----------|----------|---|-------|----------|----------|----------|----------|----------|----------|----------|---|
| ENSG0000 | remission | Inflamed | PPARGC1B  | protein_cc chr5  | 1.49E+08 | 1.49E+08 | + | 12889 | 1901.635 | 0        | 0.79618  | 0.287523 | 2.7691   | 0.006712 | 0.091905 | 1 |
| ENSG0000 | remission | Inflamed | RP11-436I | pseudoger chr12  | 9280379  | 9281241  | + | 863   | 1.677804 | 0.608592 | 0.511866 | 0.184874 | 2.768729 | 0.006719 | 0.091954 | 1 |
| ENSG0000 | remission | Inflamed | TRPV1     | protein_cc chr17 | 3468738  | 3500392  | - | 4995  | 18.09308 | 0.054893 | 0.741931 | 0.268011 | 2.76828  | 0.006728 | 0.091984 | 1 |
| ENSG0000 | remission | Inflamed | HCST      | protein_cc chr19 | 36393382 | 36395279 | + | 613   | 363.1766 | 0        | -0.65029 | 0.234921 | -2.76814 | 0.00673  | 0.091984 | 1 |
| ENSG0000 | remission | Inflamed | NMT2      | protein_cc chr10 | 15144583 | 15210692 | - | 5058  | 502.8377 | 0        | 0.522712 | 0.188838 | 2.768038 | 0.006732 | 0.091984 | 1 |
| ENSG0000 | remission | Inflamed | SNAI1     | protein_cc chr20 | 48599536 | 48605423 | + | 1686  | 195.7446 | 0.002387 | -1.04307 | 0.376848 | -2.76788 | 0.006735 | 0.091984 | 1 |
| ENSG0000 | remission | Inflamed | RDH5      | protein_cc chr12 | 56114151 | 56118489 | + | 2983  | 223.3795 | 0        | 0.652222 | 0.235686 | 2.767335 | 0.006746 | 0.092079 | 1 |
| ENSG0000 | remission | Inflamed | GPR3      | protein_cc chr1  | 27719148 | 27722318 | + | 2115  | 15.92124 | 0.078759 | -0.87839 | 0.317478 | -2.76679 | 0.006756 | 0.092145 | 1 |
| ENSG0000 | remission | Inflamed | RNU6-377  | snRNA chr3       | 12556205 | 12556306 | + | 102   | 1.066826 | 0.711217 | 0.440811 | 0.159326 | 2.766718 | 0.006758 | 0.092145 | 1 |
| ENSG0000 | remission | Inflamed | METAP1D   | protein_cc chr2  | 1.73E+08 | 1.73E+08 | + | 4850  | 244.4296 | 0        | 0.525657 | 0.190016 | 2.766391 | 0.006764 | 0.092183 | 1 |
| ENSG0000 | remission | Inflamed | PPIAP30   | pseudoger chr10  | 15196801 | 15197319 | - | 519   | 1.336516 | 0.656325 | 0.39328  | 0.142204 | 2.765605 | 0.006779 | 0.092314 | 1 |
| ENSG0000 | remission | Inflamed | APLN      | protein_cc chrX  | 1.29E+08 | 1.29E+08 | - | 3220  | 93.99523 | 0.011933 | -1.18052 | 0.426939 | -2.76507 | 0.006789 | 0.092314 | 1 |
| ENSG0000 | remission | Inflamed | RP11-730k | antisense chr11  | 1.21E+08 | 1.21E+08 | - | 2908  | 13.00239 | 0.095465 | 0.929617 | 0.336203 | 2.765051 | 0.00679  | 0.092314 | 1 |
| ENSG0000 | remission | Inflamed | ST6GAL2   | protein_cc chr2  | 1.07E+08 | 1.08E+08 | - | 7708  | 82.48687 | 0.064439 | 1.683514 | 0.608888 | 2.764898 | 0.006793 | 0.092314 | 1 |
| ENSG0000 | remission | Inflamed | LMO4      | protein_cc chr1  | 87794151 | 87814606 | + | 5833  | 1948.279 | 0        | -0.373   | 0.134907 | -2.76489 | 0.006793 | 0.092314 | 1 |
| ENSG0000 | remission | Inflamed | HLA-DPA1  | protein_cc chr6  | 33032346 | 33048552 | - | 5748  | 13032.76 | 0        | -0.64567 | 0.233544 | -2.76465 | 0.006797 | 0.092314 | 1 |
| ENSG0000 | remission | Inflamed | RP11-384L | sense_intr chr3  | 32278180 | 32280070 | - | 1891  | 73.43675 | 0.004773 | 0.714884 | 0.258583 | 2.764619 | 0.006798 | 0.092314 | 1 |
| ENSG0000 | remission | Inflamed | PRKCDBP   | protein_cc chr11 | 6340176  | 6341877  | - | 1672  | 674.7876 | 0        | -0.90875 | 0.328785 | -2.76396 | 0.006811 | 0.09244  | 1 |
| ENSG0000 | remission | Inflamed | RN7SL737I | misc_RNA chr12   | 93903263 | 93903544 | + | 282   | 15.77566 | 0.062053 | 0.762448 | 0.275895 | 2.763546 | 0.006819 | 0.092493 | 1 |
| ENSG0000 | remission | Inflamed | SLC19A1   | protein_cc chr21 | 46913486 | 46964325 | - | 9998  | 732.6301 | 0        | -0.52761 | 0.19093  | -2.76339 | 0.006822 | 0.092493 | 1 |
| ENSG0000 | remission | Inflamed | LY6G5C    | protein_cc chr6  | 31644461 | 31651817 | - | 2621  | 80.45585 | 0        | -0.37508 | 0.13575  | -2.763   | 0.006829 | 0.092512 | 1 |
| ENSG0000 | remission | Inflamed | CTB-43E15 | lincRNA chr5     | 1.73E+08 | 1.73E+08 | - | 2815  | 41.52029 | 0.085919 | -1.35782 | 0.491436 | -2.76296 | 0.00683  | 0.092512 | 1 |
| ENSG0000 | remission | Inflamed | C5AR2     | protein_cc chr19 | 47835404 | 47846606 | + | 2826  | 133.1885 | 0.002387 | -0.92729 | 0.335671 | -2.76251 | 0.006839 | 0.092583 | 1 |
| ENSG0000 | remission | Inflamed | ATP1A1    | protein_cc chr1  | 1.17E+08 | 1.17E+08 | + | 7261  | 64364.04 | 0        | 0.574892 | 0.208164 | 2.76173  | 0.006854 | 0.092739 | 1 |
| ENSG0000 | remission | Inflamed | IGKV6D-41 | IG_V_gene chr2   | 90108504 | 90109080 | + | 371   | 11.75179 | 0.608592 | -1.02939 | 0.37277  | -2.76145 | 0.006859 | 0.092765 | 1 |
| ENSG0000 | remission | Inflamed | MAML2     | protein_cc chr11 | 95709762 | 96076344 | - | 7106  | 819.5107 | 0        | 0.585338 | 0.212029 | 2.760656 | 0.006875 | 0.092927 | 1 |
| ENSG0000 | remission | Inflamed | MT1H      | protein_cc chr16 | 56703726 | 56705041 | + | 723   | 317.8496 | 0        | 1.233062 | 0.446742 | 2.760124 | 0.006885 | 0.09302  | 1 |
| ENSG0000 | remission | Inflamed | CLPP      | protein_cc chr19 | 6361463  | 6368919  | + | 2276  | 1570.136 | 0        | -0.31093 | 0.112712 | -2.75866 | 0.006914 | 0.093274 | 1 |
| ENSG0000 | remission | Inflamed | AC074363  | lincRNA chr2     | 1.68E+08 | 1.68E+08 | + | 462   | 9.823389 | 0.150358 | 0.813807 | 0.295005 | 2.758621 | 0.006915 | 0.093274 | 1 |
| ENSG0000 | remission | Inflamed | GP6       | protein_cc chr19 | 55525073 | 55549632 | - | 2703  | 10.63246 | 0.107399 | 0.736474 | 0.266972 | 2.758618 | 0.006915 | 0.093274 | 1 |
| ENSG0000 | remission | Inflamed | TAS2R4    | protein_cc chr7  | 1.41E+08 | 1.41E+08 | + | 994   | 9.374702 | 0.150358 | 0.910178 | 0.33     | 2.758116 | 0.006925 | 0.093359 | 1 |
| ENSG0000 | remission | Inflamed | RP11-80H5 | antisense chr10  | 91405039 | 91410424 | + | 605   | 1.085919 | 0.735084 | 0.409054 | 0.14836  | 2.757169 | 0.006943 | 0.093562 | 1 |
| ENSG0000 | remission | Inflamed | RTN2      | protein_cc chr19 | 45988547 | 46000319 | - | 3238  | 294.3031 | 0        | -0.5069  | 0.183939 | -2.75578 | 0.006971 | 0.09384  | 1 |
| ENSG0000 | remission | Inflamed | TFE3      | protein_cc chrX  | 48886242 | 48901012 | - | 4278  | 3137.461 | 0        | -0.37108 | 0.134664 | -2.75561 | 0.006974 | 0.09384  | 1 |
| ENSG0000 | remission | Inflamed | RGAG1     | protein_cc chrX  | 1.1E+08  | 1.1E+08  | + | 5529  | 5.689737 | 0.212411 | 0.81827  | 0.29695  | 2.755581 | 0.006975 | 0.09384  | 1 |
| ENSG0000 | remission | Inflamed | DPM2      | protein_cc chr9  | 1.31E+08 | 1.31E+08 | - | 3133  | 1263.885 | 0        | -0.25289 | 0.091783 | -2.75535 | 0.006979 | 0.093855 | 1 |
| ENSG0000 | remission | Inflamed | LINC01022 | antisense chr7   | 1.58E+08 | 1.58E+08 | + | 394   | 0.949881 | 0.732697 | 0.418244 | 0.15181  | 2.755048 | 0.006985 | 0.093886 | 1 |
| ENSG0000 | remission | Inflamed | LUZP2     | protein_cc chr11 | 24518516 | 25104150 | + | 8795  | 25.06921 | 0.109785 | 1.041659 | 0.378136 | 2.754718 | 0.006992 | 0.093926 | 1 |
| ENSG0000 | remission | Inflamed | AC021016  | processed_chr2   | 2.19E+08 | 2.19E+08 | - | 775   | 11.11217 | 0.042959 | -0.78391 | 0.284601 | -2.75442 | 0.006998 | 0.093958 | 1 |
| ENSG0000 | remission | Inflamed | RP11-627C | processed_chr11  | 1.34E+08 | 1.34E+08 | + | 8255  | 495.0692 | 0.00716  | 1.341022 | 0.48697  | 2.753806 | 0.00701  | 0.094073 | 1 |

|          |           |          |           |                  |          |          |   |       |          |          |          |          |          |          |          |   |
|----------|-----------|----------|-----------|------------------|----------|----------|---|-------|----------|----------|----------|----------|----------|----------|----------|---|
| ENSG0000 | remission | Inflamed | RP11-710M | pseudoger chr18  | 3580167  | 3580752  | + | 586   | 0.980907 | 0.754177 | -0.36958 | 0.134252 | -2.75289 | 0.007028 | 0.094269 | 1 |
| ENSG0000 | remission | Inflamed | RHBDD3    | protein_cc chr22 | 29655841 | 29664198 | - | 3014  | 806.3723 | 0        | -0.30835 | 0.112027 | -2.75242 | 0.007037 | 0.094345 | 1 |
| ENSG0000 | remission | Inflamed | SH2D3C    | protein_cc chr9  | 1.31E+08 | 1.31E+08 | - | 4599  | 860.6301 | 0        | -0.76257 | 0.27709  | -2.75206 | 0.007045 | 0.094395 | 1 |
| ENSG0000 | remission | Inflamed | REP15     | protein_cc chr12 | 27849428 | 27850566 | + | 1139  | 643.5084 | 0        | 1.045896 | 0.380096 | 2.751664 | 0.007053 | 0.094453 | 1 |
| ENSG0000 | remission | Inflamed | FAAH      | protein_cc chr1  | 46859937 | 46879520 | + | 2776  | 1533.542 | 0        | 0.659079 | 0.239579 | 2.750992 | 0.007066 | 0.094548 | 1 |
| ENSG0000 | remission | Inflamed | FADS1     | protein_cc chr11 | 61567099 | 61596790 | - | 10228 | 770.42   | 0        | -0.94928 | 0.345086 | -2.75084 | 0.007069 | 0.094548 | 1 |
| ENSG0000 | remission | Inflamed | PHLPP1    | protein_cc chr18 | 60382672 | 60647666 | + | 9153  | 1252.492 | 0        | 0.543733 | 0.197666 | 2.750769 | 0.00707  | 0.094548 | 1 |
| ENSG0000 | remission | Inflamed | GPRIN2    | protein_cc chr10 | 46994087 | 47005643 | + | 7985  | 2383.253 | 0        | 1.13461  | 0.412533 | 2.750351 | 0.007079 | 0.094612 | 1 |
| ENSG0000 | remission | Inflamed | DNAAF1    | protein_cc chr16 | 84178865 | 84212373 | + | 5939  | 22.34368 | 0.198091 | -1.28532 | 0.467502 | -2.74935 | 0.007099 | 0.094827 | 1 |
| ENSG0000 | remission | Inflamed | CXCL9     | protein_cc chr4  | 76922428 | 76928641 | - | 2740  | 1442.196 | 0        | -1.45527 | 0.529413 | -2.74884 | 0.007109 | 0.094827 | 1 |
| ENSG0000 | remission | Inflamed | RP11-191C | antisense chr1   | 51983981 | 52027301 | + | 476   | 31.93556 | 0.002387 | 0.671784 | 0.244389 | 2.748834 | 0.007109 | 0.094827 | 1 |
| ENSG0000 | remission | Inflamed | RYR3      | protein_cc chr15 | 33603163 | 34158303 | + | 16041 | 30.23389 | 0.050119 | 1.091357 | 0.397026 | 2.748829 | 0.007109 | 0.094827 | 1 |
| ENSG0000 | remission | Inflamed | CTA-445C  | lincRNA chr22    | 26917949 | 26921002 | - | 3054  | 195.3842 | 0        | -0.59802 | 0.217592 | -2.74835 | 0.007119 | 0.094909 | 1 |
| ENSG0000 | remission | Inflamed | MT1A      | protein_cc chr16 | 56672578 | 56673999 | + | 396   | 29.65632 | 0.02148  | 0.924241 | 0.336366 | 2.747723 | 0.007132 | 0.095015 | 1 |
| ENSG0000 | remission | Inflamed | IL13      | protein_cc chr5  | 1.32E+08 | 1.32E+08 | + | 2887  | 6.26969  | 0.472554 | -0.98513 | 0.358544 | -2.74759 | 0.007134 | 0.095015 | 1 |
| ENSG0000 | remission | Inflamed | RP11-297H | protein_cc chr8  | 11655437 | 11660077 | - | 1091  | 11.36277 | 0.031026 | 0.58601  | 0.213316 | 2.74714  | 0.007143 | 0.095089 | 1 |
| ENSG0000 | remission | Inflamed | CTC-297N  | antisense chr17  | 10633094 | 10718481 | + | 2102  | 66.49403 | 0        | 0.597841 | 0.217661 | 2.74666  | 0.007153 | 0.095145 | 1 |
| ENSG0000 | remission | Inflamed | IGHV3OR1  | IG_V_pseu chr16  | 33740804 | 33741266 | - | 360   | 2.190931 | 0.622912 | -0.69069 | 0.251476 | -2.74656 | 0.007155 | 0.095145 | 1 |
| ENSG0000 | remission | Inflamed | RP11-1084 | protein_cc chr5  | 33987279 | 34124633 | - | 3424  | 1.081146 | 0.72315  | 0.446851 | 0.162705 | 2.746394 | 0.007159 | 0.095145 | 1 |
| ENSG0000 | remission | Inflamed | OR51E1    | protein_cc chr11 | 4664650  | 4676718  | + | 3614  | 55.79475 | 0.004773 | -0.78825 | 0.28706  | -2.74596 | 0.007167 | 0.095214 | 1 |
| ENSG0000 | remission | Inflamed | AC007128  | antisense chr7   | 8301894  | 8384146  | + | 1853  | 2.300716 | 0.73031  | 0.627882 | 0.228686 | 2.745607 | 0.007174 | 0.095214 | 1 |
| ENSG0000 | remission | Inflamed | LRRC18    | protein_cc chr10 | 50117528 | 50143242 | - | 1784  | 15.11695 | 0.064439 | 0.891901 | 0.324847 | 2.745603 | 0.007175 | 0.095214 | 1 |
| ENSG0000 | remission | Inflamed | CDC14A    | protein_cc chr1  | 1.01E+08 | 1.01E+08 | + | 5729  | 413.389  | 0.002387 | 0.856393 | 0.312016 | 2.744705 | 0.007193 | 0.095408 | 1 |
| ENSG0000 | remission | Inflamed | MTRNR2L   | protein_cc chr7  | 1.42E+08 | 1.42E+08 | + | 1447  | 9.508353 | 0.107399 | 0.756882 | 0.275831 | 2.744007 | 0.007207 | 0.09553  | 1 |
| ENSG0000 | remission | Inflamed | ABCG5     | protein_cc chr2  | 44039611 | 44066004 | - | 3720  | 47.50119 | 0.033413 | -1.07787 | 0.392826 | -2.74389 | 0.007209 | 0.09553  | 1 |
| ENSG0000 | remission | Inflamed | ETFDH     | protein_cc chr4  | 1.6E+08  | 1.6E+08  | + | 4493  | 1232.37  | 0        | 0.594597 | 0.21674  | 2.74336  | 0.00722  | 0.095627 | 1 |
| ENSG0000 | remission | Inflamed | SLC36A1   | protein_cc chr5  | 1.51E+08 | 1.51E+08 | + | 6980  | 3069.685 | 0        | 0.630917 | 0.230001 | 2.743112 | 0.007225 | 0.095645 | 1 |
| ENSG0000 | remission | Inflamed | FAM86FP   | pseudoger chr12  | 8385108  | 8395544  | - | 994   | 36.15513 | 0.002387 | 0.522771 | 0.19059  | 2.742906 | 0.007229 | 0.09565  | 1 |
| ENSG0000 | remission | Inflamed | CLEC1A    | protein_cc chr12 | 10222153 | 10264226 | - | 3169  | 93.96181 | 0.004773 | -0.76781 | 0.279942 | -2.74274 | 0.007233 | 0.09565  | 1 |
| ENSG0000 | remission | Inflamed | MCF2L     | protein_cc chr13 | 1.14E+08 | 1.14E+08 | + | 23204 | 3256.573 | 0        | 0.564104 | 0.205695 | 2.742422 | 0.007239 | 0.095688 | 1 |
| ENSG0000 | remission | Inflamed | SIGLEC5   | protein_cc chr19 | 52114781 | 52150151 | - | 3319  | 41.52983 | 0.038186 | -1.20149 | 0.438216 | -2.74177 | 0.007253 | 0.095815 | 1 |
| ENSG0000 | remission | Inflamed | C11orf84  | protein_cc chr11 | 63580860 | 63595190 | + | 2807  | 558.9928 | 0        | -0.43496 | 0.158671 | -2.74128 | 0.007263 | 0.0959   | 1 |
| ENSG0000 | remission | Inflamed | CYP2AB1P  | pseudoger chr3   | 1.84E+08 | 1.84E+08 | - | 1831  | 7.73031  | 0.486874 | -1.154   | 0.421086 | -2.74054 | 0.007278 | 0.096007 | 1 |
| ENSG0000 | remission | Inflamed | C8orf47   | protein_cc chr8  | 99076539 | 99105838 | + | 1761  | 33.6969  | 0.031026 | 0.925675 | 0.337772 | 2.740533 | 0.007278 | 0.096007 | 1 |
| ENSG0000 | remission | Inflamed | SSTR1     | protein_cc chr14 | 38677204 | 38682272 | + | 4295  | 479.673  | 0.004773 | 1.016027 | 0.370777 | 2.740262 | 0.007284 | 0.09602  | 1 |
| ENSG0000 | remission | Inflamed | RP11-150C | lincRNA chr8     | 37454998 | 37457376 | - | 2379  | 292.463  | 0.00716  | 0.846941 | 0.309088 | 2.74013  | 0.007286 | 0.09602  | 1 |
| ENSG0000 | remission | Inflamed | CTD-2134  | lincRNA chr14    | 1.04E+08 | 1.04E+08 | - | 582   | 6.587112 | 0.140811 | 0.63127  | 0.230423 | 2.739621 | 0.007297 | 0.096109 | 1 |
| ENSG0000 | remission | Inflamed | ATF5      | protein_cc chr19 | 50431959 | 50437192 | + | 2954  | 1825.372 | 0        | -0.39004 | 0.142459 | -2.73788 | 0.007333 | 0.096535 | 1 |
| ENSG0000 | remission | Inflamed | C6orf226  | protein_cc chr6  | 42858005 | 42858554 | - | 550   | 95.90692 | 0        | -0.45485 | 0.166153 | -2.73756 | 0.007339 | 0.096537 | 1 |
| ENSG0000 | remission | Inflamed | KRT18P26  | pseudoger chr2   | 74533855 | 74535135 | - | 1281  | 2.281623 | 0.455847 | -0.51587 | 0.188444 | -2.73752 | 0.00734  | 0.096537 | 1 |

|          |           |          |           |                  |          |          |   |       |          |          |          |          |          |          |          |   |
|----------|-----------|----------|-----------|------------------|----------|----------|---|-------|----------|----------|----------|----------|----------|----------|----------|---|
| ENSG0000 | remission | Inflamed | PLD3      | protein_cc chr19 | 40854363 | 40886346 | + | 5184  | 8170.141 | 0        | -0.43609 | 0.15932  | -2.73719 | 0.007347 | 0.096538 | 1 |
| ENSG0000 | remission | Inflamed | AC069213  | pseudoger chr3   | 1.95E+08 | 1.95E+08 | + | 1680  | 331.8401 | 0.004773 | 0.982328 | 0.3589   | 2.737054 | 0.00735  | 0.096538 | 1 |
| ENSG0000 | remission | Inflamed | SLC2A6    | protein_cc chr9  | 1.36E+08 | 1.36E+08 | - | 3540  | 464.7566 | 0        | -0.85264 | 0.311584 | -2.73648 | 0.007362 | 0.096538 | 1 |
| ENSG0000 | remission | Inflamed | TREH      | protein_cc chr11 | 1.19E+08 | 1.19E+08 | - | 3181  | 165.1766 | 0.004773 | 0.974302 | 0.356053 | 2.736391 | 0.007364 | 0.096538 | 1 |
| ENSG0000 | remission | Inflamed | ZDHC3     | protein_cc chr3  | 44956749 | 45017677 | - | 7609  | 7289.623 | 0        | 0.299885 | 0.109599 | 2.736205 | 0.007368 | 0.096538 | 1 |
| ENSG0000 | remission | Inflamed | RP11-362L | sense_intr chr14 | 1.01E+08 | 1.01E+08 | + | 606   | 1.653938 | 0.553699 | 0.482614 | 0.176382 | 2.736194 | 0.007368 | 0.096538 | 1 |
| ENSG0000 | remission | Inflamed | RP11-349k | lincRNA chr12    | 1.29E+08 | 1.29E+08 | - | 552   | 101.4773 | 0.100239 | 1.395776 | 0.510156 | 2.73598  | 0.007372 | 0.096538 | 1 |
| ENSG0000 | remission | Inflamed | SLC26A6   | protein_cc chr3  | 48663156 | 48672926 | - | 6373  | 3176.695 | 0        | 0.487456 | 0.178169 | 2.73592  | 0.007373 | 0.096538 | 1 |
| ENSG0000 | remission | Inflamed | LAPTM5    | protein_cc chr1  | 31205316 | 31230667 | - | 3274  | 9853.138 | 0        | -0.61723 | 0.225626 | -2.73565 | 0.007379 | 0.096538 | 1 |
| ENSG0000 | remission | Inflamed | MIR600HC  | sense_intr chr9  | 1.26E+08 | 1.26E+08 | - | 5984  | 446.6921 | 0.004773 | 0.889484 | 0.325155 | 2.735566 | 0.007381 | 0.096538 | 1 |
| ENSG0000 | remission | Inflamed | RP11-690C | lincRNA chr17    | 37408897 | 37410550 | - | 1654  | 172.9737 | 0.002387 | 0.589566 | 0.21552  | 2.735544 | 0.007381 | 0.096538 | 1 |
| ENSG0000 | remission | Inflamed | CNGA4     | protein_cc chr11 | 6255995  | 6265659  | + | 2167  | 4.828162 | 0.205251 | 0.541578 | 0.197989 | 2.735393 | 0.007384 | 0.096538 | 1 |
| ENSG0000 | remission | Inflamed | EFCAB5    | protein_cc chr17 | 28256218 | 28435470 | + | 6928  | 21.24344 | 0.01432  | 0.724426 | 0.264946 | 2.734242 | 0.007408 | 0.096803 | 1 |
| ENSG0000 | remission | Inflamed | CORO1A    | protein_cc chr16 | 30194148 | 30200397 | + | 4871  | 5579.179 | 0        | -0.75586 | 0.276519 | -2.73349 | 0.007424 | 0.096952 | 1 |
| ENSG0000 | remission | Inflamed | RBPM5-AS  | antisense chr8   | 30239635 | 30242917 | - | 1171  | 16.65632 | 0.0358   | -0.68865 | 0.251954 | -2.73323 | 0.00743  | 0.096952 | 1 |
| ENSG0000 | remission | Inflamed | IGLJ1     | IG_J_gene chr22  | 23235872 | 23235998 | + | 127   | 6.570406 | 0.143198 | -0.66224 | 0.242299 | -2.73317 | 0.007431 | 0.096952 | 1 |
| ENSG0000 | remission | Inflamed | SLC35D1   | protein_cc chr1  | 67465015 | 67519782 | - | 7154  | 4387.673 | 0        | 0.788501 | 0.288553 | 2.732604 | 0.007443 | 0.097012 | 1 |
| ENSG0000 | remission | Inflamed | SLC4A11   | protein_cc chr20 | 3208063  | 3219836  | - | 4081  | 176.3604 | 0.004773 | -0.91536 | 0.334979 | -2.7326  | 0.007443 | 0.097012 | 1 |
| ENSG0000 | remission | Inflamed | NEK3      | protein_cc chr13 | 52706775 | 52733996 | - | 4272  | 731.6874 | 0        | 0.697971 | 0.255481 | 2.731992 | 0.007456 | 0.097043 | 1 |
| ENSG0000 | remission | Inflamed | NHSL1     | protein_cc chr6  | 1.39E+08 | 1.39E+08 | - | 8741  | 4314.566 | 0        | 0.772605 | 0.282823 | 2.731764 | 0.00746  | 0.097043 | 1 |
| ENSG0000 | remission | Inflamed | MYH7B     | protein_cc chr20 | 33563206 | 33590240 | + | 7929  | 46.62291 | 0.023866 | 0.651009 | 0.238316 | 2.7317   | 0.007462 | 0.097043 | 1 |
| ENSG0000 | remission | Inflamed | MNX1-AS1  | antisense chr7   | 1.57E+08 | 1.57E+08 | + | 1041  | 19.8043  | 0.026253 | 0.744181 | 0.272431 | 2.731636 | 0.007463 | 0.097043 | 1 |
| ENSG0000 | remission | Inflamed | LCP2      | protein_cc chr5  | 1.7E+08  | 1.7E+08  | - | 7231  | 2017.652 | 0        | -0.77055 | 0.282087 | -2.73161 | 0.007464 | 0.097043 | 1 |
| ENSG0000 | remission | Inflamed | FMO3      | protein_cc chr1  | 1.71E+08 | 1.71E+08 | + | 3463  | 39.94749 | 0.026253 | -0.97918 | 0.358489 | -2.73141 | 0.007468 | 0.097048 | 1 |
| ENSG0000 | remission | Inflamed | CTC-205M  | sense_ove chr5   | 1.8E+08  | 1.8E+08  | - | 3088  | 114.7876 | 0.009547 | -0.70455 | 0.257964 | -2.7312  | 0.007472 | 0.097052 | 1 |
| ENSG0000 | remission | Inflamed | LRP6      | protein_cc chr12 | 12268959 | 12419946 | - | 10337 | 1082.556 | 0        | 0.729709 | 0.267196 | 2.730988 | 0.007477 | 0.097052 | 1 |
| ENSG0000 | remission | Inflamed | RP11-283C | antisense chr12  | 26278088 | 26279550 | - | 826   | 52.00477 | 0.026253 | 0.728456 | 0.266782 | 2.730534 | 0.007486 | 0.097052 | 1 |
| ENSG0000 | remission | Inflamed | LDHAP4    | pseudoger chr9   | 14921335 | 14922332 | - | 998   | 138.3079 | 0.004773 | -0.64753 | 0.237147 | -2.7305  | 0.007487 | 0.097052 | 1 |
| ENSG0000 | remission | Inflamed | ANXA10    | protein_cc chr4  | 1.69E+08 | 1.69E+08 | + | 1812  | 114.7494 | 0.367542 | -2.03109 | 0.743913 | -2.73027 | 0.007492 | 0.097052 | 1 |
| ENSG0000 | remission | Inflamed | SPIRE2    | protein_cc chr16 | 89884587 | 89937727 | + | 7975  | 2301.699 | 0        | 0.716906 | 0.262587 | 2.730168 | 0.007494 | 0.097052 | 1 |
| ENSG0000 | remission | Inflamed | RP11-488L | pseudoger chr1   | 2.47E+08 | 2.47E+08 | - | 1670  | 2.539379 | 0.477327 | 0.598864 | 0.219362 | 2.73002  | 0.007497 | 0.097052 | 1 |
| ENSG0000 | remission | Inflamed | KCNH8     | protein_cc chr3  | 19189946 | 19577138 | + | 6232  | 63.45107 | 0.011933 | 0.97566  | 0.357421 | 2.729724 | 0.007503 | 0.097052 | 1 |
| ENSG0000 | remission | Inflamed | FAT3      | protein_cc chr11 | 92085262 | 92629618 | + | 19420 | 16.37709 | 0.081146 | 0.884089 | 0.323881 | 2.729676 | 0.007504 | 0.097052 | 1 |
| ENSG0000 | remission | Inflamed | ZSCAN9    | protein_cc chr6  | 28192664 | 28201260 | + | 3705  | 338.0191 | 0        | 0.469875 | 0.172137 | 2.729649 | 0.007505 | 0.097052 | 1 |
| ENSG0000 | remission | Inflamed | CCT8P1    | pseudoger chr1   | 1.47E+08 | 1.47E+08 | - | 1657  | 63.72315 | 0.009547 | 0.860163 | 0.315187 | 2.729054 | 0.007518 | 0.097131 | 1 |
| ENSG0000 | remission | Inflamed | ARID3A    | protein_cc chr19 | 925781   | 975939   | + | 7504  | 1040.315 | 0        | -0.62115 | 0.227611 | -2.72901 | 0.007518 | 0.097131 | 1 |
| ENSG0000 | remission | Inflamed | AGAP2-AS  | protein_cc chr12 | 58120054 | 58122139 | + | 1500  | 225.1862 | 0        | -0.50244 | 0.184122 | -2.72881 | 0.007523 | 0.097137 | 1 |
| ENSG0000 | remission | Inflamed | CARD9     | protein_cc chr9  | 1.39E+08 | 1.39E+08 | - | 6699  | 249.4582 | 0        | -0.57401 | 0.21037  | -2.72858 | 0.007528 | 0.097154 | 1 |
| ENSG0000 | remission | Inflamed | MFSD9     | protein_cc chr2  | 1.03E+08 | 1.03E+08 | - | 4367  | 1212.535 | 0        | 0.442764 | 0.162345 | 2.727312 | 0.007555 | 0.097453 | 1 |
| ENSG0000 | remission | Inflamed | CTC-360G  | protein_cc chr19 | 39399620 | 39402798 | - | 1057  | 5.801909 | 0.167064 | 0.6396   | 0.234542 | 2.727015 | 0.007561 | 0.097459 | 1 |

|          |           |          |           |                  |          |          |   |       |          |          |          |          |          |          |          |   |
|----------|-----------|----------|-----------|------------------|----------|----------|---|-------|----------|----------|----------|----------|----------|----------|----------|---|
| ENSG0000 | remission | Inflamed | SAMD11    | protein_cc chr1  | 860260   | 879955   | + | 3205  | 499.1146 | 0        | -0.58419 | 0.214231 | -2.72694 | 0.007562 | 0.097459 | 1 |
| ENSG0000 | remission | Inflamed | CHMP4C    | protein_cc chr8  | 82644669 | 82671750 | + | 1866  | 646.136  | 0        | 0.750131 | 0.275128 | 2.726478 | 0.007572 | 0.097539 | 1 |
| ENSG0000 | remission | Inflamed | CPT1A     | protein_cc chr11 | 68522088 | 68611878 | - | 6565  | 11477.06 | 0        | 0.562663 | 0.20647  | 2.725161 | 0.0076   | 0.097853 | 1 |
| ENSG0000 | remission | Inflamed | HTRA3     | protein_cc chr4  | 8271492  | 8308838  | + | 3321  | 1223.031 | 0        | -1.0289  | 0.377632 | -2.72461 | 0.007612 | 0.097879 | 1 |
| ENSG0000 | remission | Inflamed | PARD6A    | protein_cc chr16 | 67694849 | 67696681 | + | 1488  | 126.3389 | 0        | -0.47265 | 0.173482 | -2.72448 | 0.007615 | 0.097879 | 1 |
| ENSG0000 | remission | Inflamed | GIPC2     | protein_cc chr1  | 78445226 | 78604133 | + | 3973  | 875.895  | 0        | 0.792706 | 0.290967 | 2.724379 | 0.007617 | 0.097879 | 1 |
| ENSG0000 | remission | Inflamed | HOXB2     | protein_cc chr17 | 46618256 | 46623441 | - | 3460  | 287.9714 | 0        | -0.51701 | 0.189784 | -2.72423 | 0.00762  | 0.097879 | 1 |
| ENSG0000 | remission | Inflamed | TSEN2     | protein_cc chr3  | 12525931 | 12581122 | + | 5667  | 441.4439 | 0        | 0.631587 | 0.231848 | 2.724147 | 0.007622 | 0.097879 | 1 |
| ENSG0000 | remission | Inflamed | LRG1      | protein_cc chr19 | 4536421  | 4540486  | - | 3133  | 2379.876 | 0        | -0.58566 | 0.214999 | -2.72402 | 0.007625 | 0.097879 | 1 |
| ENSG0000 | remission | Inflamed | XX-C283C7 | antisense chr22  | 50753060 | 50754437 | + | 531   | 2.505967 | 0.47494  | -0.60711 | 0.222908 | -2.72359 | 0.007634 | 0.097933 | 1 |
| ENSG0000 | remission | Inflamed | ZFAT      | protein_cc chr8  | 1.35E+08 | 1.36E+08 | - | 8900  | 450.1885 | 0        | -0.32258 | 0.118444 | -2.72348 | 0.007636 | 0.097933 | 1 |
| ENSG0000 | remission | Inflamed | AC016735  | lincRNA chr2     | 43228495 | 43233200 | - | 237   | 11.65155 | 0.02148  | 0.680602 | 0.249954 | 2.722906 | 0.007649 | 0.098043 | 1 |
| ENSG0000 | remission | Inflamed | UCN2      | protein_cc chr3  | 48599160 | 48601206 | - | 1481  | 63.98807 | 0.140811 | -1.65084 | 0.606353 | -2.72258 | 0.007656 | 0.098043 | 1 |
| ENSG0000 | remission | Inflamed | RP5-1013A | lincRNA chr20    | 43062837 | 43063236 | + | 400   | 16.06444 | 0.047733 | 0.758068 | 0.278439 | 2.722562 | 0.007656 | 0.098043 | 1 |
| ENSG0000 | remission | Inflamed | CNPY3     | protein_cc chr6  | 42896938 | 42907025 | + | 1704  | 1789.208 | 0        | -0.37425 | 0.137488 | -2.72207 | 0.007667 | 0.09813  | 1 |
| ENSG0000 | remission | Inflamed | VASN      | protein_cc chr16 | 4421849  | 4433529  | + | 2806  | 841.0716 | 0        | -0.93197 | 0.342408 | -2.72181 | 0.007672 | 0.098153 | 1 |
| ENSG0000 | remission | Inflamed | EMR1      | protein_cc chr19 | 6887577  | 6940470  | + | 3707  | 238.568  | 0        | -0.92585 | 0.340237 | -2.72119 | 0.007686 | 0.098234 | 1 |
| ENSG0000 | remission | Inflamed | SRGAP1    | protein_cc chr12 | 64238073 | 64541613 | + | 12253 | 978.0907 | 0        | 0.585018 | 0.214994 | 2.721085 | 0.007688 | 0.098234 | 1 |
| ENSG0000 | remission | Inflamed | C6orf223  | protein_cc chr6  | 43968317 | 43973695 | + | 3917  | 399.2267 | 0        | -1.05492 | 0.387699 | -2.72098 | 0.00769  | 0.098234 | 1 |
| ENSG0000 | remission | Inflamed | PGLYRP1   | protein_cc chr19 | 46522411 | 46526323 | - | 720   | 27.10024 | 0.131265 | -1.30966 | 0.481359 | -2.72076 | 0.007695 | 0.098234 | 1 |
| ENSG0000 | remission | Inflamed | RP11-203J | processed_chr9   | 1.31E+08 | 1.31E+08 | - | 1160  | 107.1814 | 0.01432  | 1.183998 | 0.435223 | 2.720442 | 0.007702 | 0.098234 | 1 |
| ENSG0000 | remission | Inflamed | AC092171  | antisense chr7   | 5459477  | 5462753  | + | 753   | 2.610979 | 0.372315 | 0.518599 | 0.190637 | 2.720351 | 0.007704 | 0.098234 | 1 |
| ENSG0000 | remission | Inflamed | LGALS1    | protein_cc chr22 | 38071615 | 38075813 | + | 1099  | 3500.754 | 0        | -0.80307 | 0.295214 | -2.72031 | 0.007705 | 0.098234 | 1 |
| ENSG0000 | remission | Inflamed | TREML4    | protein_cc chr6  | 41196062 | 41206620 | + | 2712  | 4.245823 | 0.73031  | -0.71679 | 0.263532 | -2.71993 | 0.007713 | 0.098244 | 1 |
| ENSG0000 | remission | Inflamed | IGFBP7    | protein_cc chr4  | 57896939 | 57976551 | - | 1932  | 8715.718 | 0        | -0.79658 | 0.292897 | -2.71964 | 0.007719 | 0.098244 | 1 |
| ENSG0000 | remission | Inflamed | GAPDHP7   | pseudoger chr6   | 1.66E+08 | 1.66E+08 | + | 1010  | 1.243437 | 0.708831 | -0.39662 | 0.14584  | -2.71958 | 0.007721 | 0.098244 | 1 |
| ENSG0000 | remission | Inflamed | HOXA6     | protein_cc chr7  | 27185015 | 27190222 | - | 1285  | 230.8687 | 0.016706 | 0.950953 | 0.34969  | 2.719421 | 0.007724 | 0.098244 | 1 |
| ENSG0000 | remission | Inflamed | OIT3      | protein_cc chr10 | 74653339 | 74692791 | + | 2365  | 30.70644 | 0.054893 | -1.00404 | 0.369212 | -2.71941 | 0.007724 | 0.098244 | 1 |
| ENSG0000 | remission | Inflamed | SLC4A2    | protein_cc chr7  | 1.51E+08 | 1.51E+08 | + | 7590  | 4335.215 | 0        | -0.4002  | 0.147209 | -2.71855 | 0.007743 | 0.09837  | 1 |
| ENSG0000 | remission | Inflamed | CTD-2196f | lincRNA chr16    | 23683453 | 23686820 | + | 372   | 44.35561 | 0.02148  | 0.675226 | 0.248384 | 2.718474 | 0.007745 | 0.09837  | 1 |
| ENSG0000 | remission | Inflamed | GSDMC     | protein_cc chr8  | 1.31E+08 | 1.31E+08 | - | 2934  | 24.41289 | 0.095465 | -1.06801 | 0.392877 | -2.71844 | 0.007745 | 0.09837  | 1 |
| ENSG0000 | remission | Inflamed | DCPS      | protein_cc chr11 | 1.26E+08 | 1.26E+08 | + | 3352  | 717.6062 | 0        | -0.35988 | 0.132413 | -2.71788 | 0.007758 | 0.098479 | 1 |
| ENSG0000 | remission | Inflamed | PCDHA3    | protein_cc chr5  | 1.4E+08  | 1.4E+08  | + | 5341  | 6.386635 | 0.131265 | 0.688619 | 0.253417 | 2.717338 | 0.007769 | 0.098483 | 1 |
| ENSG0000 | remission | Inflamed | CEBPE     | protein_cc chr14 | 23586513 | 23588825 | - | 1554  | 64.50835 | 0.01432  | -1.05105 | 0.386806 | -2.71726 | 0.007771 | 0.098483 | 1 |
| ENSG0000 | remission | Inflamed | TRAK1     | protein_cc chr3  | 42055294 | 42267381 | + | 10992 | 5640.623 | 0        | 0.465621 | 0.171389 | 2.716756 | 0.007782 | 0.098483 | 1 |
| ENSG0000 | remission | Inflamed | DYRK2     | protein_cc chr12 | 68042118 | 68059186 | + | 9494  | 3665.859 | 0        | 0.720076 | 0.265055 | 2.716709 | 0.007783 | 0.098483 | 1 |
| ENSG0000 | remission | Inflamed | RP11-210f | protein_cc chr15 | 80637195 | 80695917 | - | 787   | 1.995227 | 0.48926  | 0.492039 | 0.181124 | 2.716589 | 0.007786 | 0.098483 | 1 |
| ENSG0000 | remission | Inflamed | SLC35F6   | protein_cc chr2  | 26987152 | 27004099 | + | 3902  | 2279.37  | 0        | -0.32012 | 0.117838 | -2.71658 | 0.007786 | 0.098483 | 1 |
| ENSG0000 | remission | Inflamed | AC024592  | antisense chr19  | 5847478  | 5858250  | + | 1188  | 30.47255 | 0.085919 | 1.06063  | 0.39044  | 2.716499 | 0.007788 | 0.098483 | 1 |
| ENSG0000 | remission | Inflamed | AC011747  | lincRNA chr2     | 8683722  | 8715631  | - | 1036  | 12.31981 | 0.064439 | 0.787555 | 0.289916 | 2.716489 | 0.007788 | 0.098483 | 1 |



|          |           |          |           |            |       |          |          |   |       |          |          |          |          |          |          |          |   |
|----------|-----------|----------|-----------|------------|-------|----------|----------|---|-------|----------|----------|----------|----------|----------|----------|----------|---|
| ENSG0000 | remission | Inflamed | CTSC      | protein_cc | chr11 | 88026760 | 88070955 | - | 11421 | 7865.368 | 0        | -0.44925 | 0.165397 | -2.71617 | 0.007795 | 0.098523 | 1 |
| ENSG0000 | remission | Inflamed | ULBP2     | protein_cc | chr6  | 1.5E+08  | 1.5E+08  | + | 1349  | 10.57518 | 0.116945 | -0.89711 | 0.330322 | -2.71586 | 0.007802 | 0.098547 | 1 |
| ENSG0000 | remission | Inflamed | CTD-2196E | antisense  | chr16 | 23698370 | 23699665 | - | 473   | 30.36516 | 0.02148  | 0.820252 | 0.302073 | 2.71541  | 0.007812 | 0.098547 | 1 |
| ENSG0000 | remission | Inflamed | RP11-423E | antisense  | chr5  | 1.77E+08 | 1.77E+08 | + | 1421  | 13.95943 | 0.026253 | 0.603246 | 0.22216  | 2.715366 | 0.007813 | 0.098547 | 1 |
| ENSG0000 | remission | Inflamed | DTX4      | protein_cc | chr11 | 58938903 | 58976060 | + | 6072  | 5949.203 | 0        | 0.458328 | 0.168794 | 2.715306 | 0.007814 | 0.098547 | 1 |
| ENSG0000 | remission | Inflamed | CTD-3051E | lincRNA    | chr14 | 1.05E+08 | 1.05E+08 | - | 1045  | 10.82578 | 0.169451 | 0.861715 | 0.317364 | 2.715229 | 0.007816 | 0.098547 | 1 |
| ENSG0000 | remission | Inflamed | RP11-428E | antisense  | chr1  | 1.79E+08 | 1.79E+08 | - | 1980  | 30.62053 | 0.011933 | -0.66791 | 0.246062 | -2.71442 | 0.007833 | 0.098693 | 1 |
| ENSG0000 | remission | Inflamed | RP11-875C | antisense  | chr8  | 22842109 | 22876848 | - | 2268  | 98.22196 | 0        | -0.59102 | 0.21774  | -2.71434 | 0.007835 | 0.098693 | 1 |
| ENSG0000 | remission | Inflamed | APOE      | protein_cc | chr19 | 45409011 | 45412650 | + | 2191  | 6253.969 | 0        | -0.65265 | 0.240458 | -2.71419 | 0.007838 | 0.098693 | 1 |
| ENSG0000 | remission | Inflamed | GUCA2B    | protein_cc | chr1  | 42619092 | 42621495 | + | 597   | 1477.284 | 0.004773 | 1.851916 | 0.682397 | 2.713838 | 0.007846 | 0.098743 | 1 |
| ENSG0000 | remission | Inflamed | MAPK11    | protein_cc | chr22 | 50702142 | 50709196 | - | 3321  | 350.1002 | 0        | -0.80495 | 0.296653 | -2.71344 | 0.007855 | 0.098794 | 1 |
| ENSG0000 | remission | Inflamed | SLC35G2   | protein_cc | chr3  | 1.37E+08 | 1.37E+08 | + | 4287  | 74.97136 | 0.004773 | -0.82514 | 0.304155 | -2.71291 | 0.007867 | 0.098794 | 1 |
| ENSG0000 | remission | Inflamed | GLYATL3   | protein_cc | chr6  | 49467671 | 49494760 | + | 1124  | 1.880668 | 0.649165 | 0.572031 | 0.210865 | 2.712785 | 0.007869 | 0.098794 | 1 |
| ENSG0000 | remission | Inflamed | CHRNE     | protein_cc | chr17 | 4801069  | 4806369  | - | 2641  | 51.42005 | 0        | -0.655   | 0.241452 | -2.71276 | 0.00787  | 0.098794 | 1 |
| ENSG0000 | remission | Inflamed | RP11-363E | sense_ove  | chr9  | 19453207 | 19455171 | + | 1965  | 208.4033 | 0.002387 | 0.89654  | 0.330505 | 2.712638 | 0.007873 | 0.098794 | 1 |
| ENSG0000 | remission | Inflamed | CASP4     | protein_cc | chr11 | 1.05E+08 | 1.05E+08 | - | 7256  | 1541.778 | 0        | -0.66658 | 0.245731 | -2.71263 | 0.007873 | 0.098794 | 1 |
| ENSG0000 | remission | Inflamed | CTD-2523E | antisense  | chr11 | 1.2E+08  | 1.2E+08  | + | 523   | 11.05251 | 0.033413 | 0.615559 | 0.226968 | 2.712094 | 0.007885 | 0.098896 | 1 |
| ENSG0000 | remission | Inflamed | C12orf45  | protein_cc | chr12 | 1.05E+08 | 1.05E+08 | + | 1424  | 233.8401 | 0        | -0.38467 | 0.141857 | -2.71167 | 0.007894 | 0.098931 | 1 |
| ENSG0000 | remission | Inflamed | AL020996  | protein_cc | chr1  | 26145212 | 26147288 | - | 2077  | 22.30788 | 0.016706 | 0.51257  | 0.189027 | 2.711626 | 0.007895 | 0.098931 | 1 |
| ENSG0000 | remission | Inflamed | LY6D      | protein_cc | chr8  | 1.44E+08 | 1.44E+08 | - | 1553  | 75.7852  | 0.367542 | -1.91483 | 0.706273 | -2.71118 | 0.007905 | 0.099009 | 1 |
| ENSG0000 | remission | Inflamed | RELB      | protein_cc | chr19 | 45504688 | 45541452 | + | 3031  | 1684.542 | 0        | -0.46241 | 0.170595 | -2.71056 | 0.007919 | 0.099134 | 1 |
| ENSG0000 | remission | Inflamed | RP11-708E | lincRNA    | chr17 | 47249257 | 47250608 | + | 1352  | 502.0167 | 0.042959 | 1.686149 | 0.622188 | 2.710032 | 0.00793  | 0.099228 | 1 |
| ENSG0000 | remission | Inflamed | MYO1G     | protein_cc | chr7  | 45002261 | 45018697 | - | 8653  | 1283.862 | 0        | -0.76628 | 0.282771 | -2.70988 | 0.007934 | 0.099228 | 1 |
| ENSG0000 | remission | Inflamed | PROC      | protein_cc | chr2  | 1.28E+08 | 1.28E+08 | + | 2495  | 32.54415 | 0.011933 | 0.732711 | 0.270409 | 2.709644 | 0.007939 | 0.099246 | 1 |
| ENSG0000 | remission | Inflamed | NR3C2     | protein_cc | chr4  | 1.49E+08 | 1.49E+08 | - | 6607  | 2936.229 | 0        | 1.056755 | 0.390027 | 2.709442 | 0.007943 | 0.099255 | 1 |
| ENSG0000 | remission | Inflamed | RP11-542E | antisense  | chr9  | 1.25E+08 | 1.25E+08 | + | 259   | 2.582339 | 0.548926 | -0.68961 | 0.254548 | -2.70917 | 0.007949 | 0.099263 | 1 |
| ENSG0000 | remission | Inflamed | BCL2L14   | protein_cc | chr12 | 12202778 | 12364018 | + | 5112  | 841.8449 | 0        | 0.822136 | 0.303498 | 2.708865 | 0.007956 | 0.099263 | 1 |
| ENSG0000 | remission | Inflamed | TM4SF20   | protein_cc | chr2  | 2.28E+08 | 2.28E+08 | - | 2757  | 903.5632 | 0.026253 | -1.78328 | 0.658419 | -2.70842 | 0.007966 | 0.099263 | 1 |
| ENSG0000 | remission | Inflamed | HLA-DPB1  | protein_cc | chr6  | 33043703 | 33054978 | + | 2862  | 7398.523 | 0        | -0.59156 | 0.218421 | -2.70835 | 0.007968 | 0.099263 | 1 |
| ENSG0000 | remission | Inflamed | ELL2      | protein_cc | chr5  | 95220802 | 95297775 | - | 7246  | 2321.671 | 0        | -0.78369 | 0.289361 | -2.70834 | 0.007968 | 0.099263 | 1 |
| ENSG0000 | remission | Inflamed | RPS10P7   | lincRNA    | chr1  | 2.01E+08 | 2.01E+08 | + | 2329  | 87.69451 | 0        | 0.572358 | 0.211342 | 2.7082   | 0.007971 | 0.099263 | 1 |
| ENSG0000 | remission | Inflamed | IGLV9-49  | IG_V_gene  | chr22 | 22697539 | 22698084 | + | 409   | 434.5394 | 0.004773 | -1.4631  | 0.540284 | -2.70803 | 0.007975 | 0.099263 | 1 |
| ENSG0000 | remission | Inflamed | BCL6      | protein_cc | chr3  | 1.87E+08 | 1.87E+08 | - | 5938  | 1540.241 | 0        | -0.88989 | 0.328622 | -2.70793 | 0.007977 | 0.099263 | 1 |
| ENSG0000 | remission | Inflamed | RP11-175E | lincRNA    | chr5  | 1.59E+08 | 1.59E+08 | + | 3214  | 22.50358 | 0.023866 | -0.86024 | 0.31768  | -2.70789 | 0.007978 | 0.099263 | 1 |
| ENSG0000 | remission | Inflamed | CTD-2616E | sense_intr | chr19 | 51864966 | 51868798 | - | 473   | 15.20286 | 0.076372 | 0.729531 | 0.269468 | 2.707304 | 0.007991 | 0.09936  | 1 |
| ENSG0000 | remission | Inflamed | ANKRD16   | protein_cc | chr10 | 5903580  | 5931869  | - | 3059  | 260.42   | 0        | -0.3484  | 0.128696 | -2.70712 | 0.007995 | 0.09936  | 1 |
| ENSG0000 | remission | Inflamed | ABAT      | protein_cc | chr16 | 8768422  | 8878432  | + | 9744  | 1102.709 | 0        | 0.645647 | 0.238525 | 2.706827 | 0.008002 | 0.09936  | 1 |
| ENSG0000 | remission | Inflamed | RP11-834E | lincRNA    | chr12 | 54555849 | 54558236 | - | 754   | 2.484487 | 0.47494  | 0.579356 | 0.214041 | 2.706747 | 0.008004 | 0.09936  | 1 |
| ENSG0000 | remission | Inflamed | DNMBP     | protein_cc | chr10 | 1.02E+08 | 1.02E+08 | - | 8634  | 3311.007 | 0        | 0.611048 | 0.225754 | 2.706699 | 0.008005 | 0.09936  | 1 |
| ENSG0000 | remission | Inflamed | RPL39L    | protein_cc | chr3  | 1.87E+08 | 1.87E+08 | - | 1060  | 107.0788 | 0        | -0.64651 | 0.238961 | -2.7055  | 0.008032 | 0.099646 | 1 |

|          |           |          |            |               |       |          |          |   |       |          |          |          |          |          |          |          |          |
|----------|-----------|----------|------------|---------------|-------|----------|----------|---|-------|----------|----------|----------|----------|----------|----------|----------|----------|
| ENSG0000 | remission | Inflamed | RP11-245J  | lincRNA       | chr3  | 63993758 | 63994368 | - | 611   | 1.930788 | 0.5179   | 0.515991 | 0.190759 | 2.704942 | 0.008044 | 0.099701 | 1        |
| ENSG0000 | remission | Inflamed | FAP        | protein_cc    | chr2  | 1.63E+08 | 1.63E+08 | - | 7003  | 181.5656 | 0.01432  | -1.46764 | 0.542593 | -2.70487 | 0.008046 | 0.099701 | 1        |
| ENSG0000 | remission | Inflamed | RP11-3K16  | sense_intr    | chr3  | 1.69E+08 | 1.69E+08 | - | 513   | 0.842482 | 0.799523 | 0.400427 | 0.148045 | 2.704767 | 0.008048 | 0.099701 | 1        |
| ENSG0000 | remission | Inflamed | RP11-247L  | lincRNA       | chr14 | 50793244 | 50794627 | - | 446   | 41.73747 | 0.011933 | 0.818449 | 0.302623 | 2.70452  | 0.008054 | 0.099701 | 1        |
| ENSG0000 | remission | Inflamed | SERPINF2   | protein_cc    | chr17 | 1646130  | 1658562  | + | 2348  | 170.5847 | 0        | -0.64104 | 0.237037 | -2.70438 | 0.008057 | 0.099701 | 1        |
| ENSG0000 | remission | Inflamed | CTSL       | protein_cc    | chr9  | 90340434 | 90346308 | + | 2366  | 2232.069 | 0        | -0.68497 | 0.253291 | -2.7043  | 0.008059 | 0.099701 | 1        |
| ENSG0000 | remission | Inflamed | SNAI3      | protein_cc    | chr16 | 88744090 | 88752901 | - | 1732  | 139.6301 | 0        | -0.6301  | 0.233105 | -2.70309 | 0.008086 | 0.09999  | 1        |
| ENSG0000 | response  | Inflamed | FAM101A    | protein_cc    | chr12 | 1.24E+08 | 1.25E+08 | + | 2969  | 1472.277 | 0        | 1.298589 | 0.160884 | 8.071602 | 1.69E-12 | 4.43E-08 | 4.43E-08 |
| ENSG0000 | response  | Inflamed | SSTR3      | protein_cc    | chr22 | 37600278 | 37608362 | - | 4520  | 59.72554 | 0.002387 | -1.58726 | 0.207557 | -7.64735 | 1.36E-11 | 1.45E-07 | 3.56E-07 |
| ENSG0000 | response  | Inflamed | PCBP3      | protein_cc    | chr21 | 47063608 | 47362368 | + | 6796  | 223.2792 | 0        | -1.47383 | 0.193784 | -7.60554 | 1.66E-11 | 1.45E-07 | 4.37E-07 |
| ENSG0000 | response  | Inflamed | CTB-41I6.1 | lincRNA       | chr17 | 8869213  | 8870387  | + | 402   | 11.28878 | 0.033413 | -1.03862 | 0.137615 | -7.54727 | 2.21E-11 | 1.45E-07 | 5.81E-07 |
| ENSG0000 | response  | Inflamed | LILRA1     | protein_cc    | chr19 | 55105047 | 55113555 | + | 3587  | 185.6158 | 0.002387 | -1.61939 | 0.221036 | -7.32636 | 6.45E-11 | 2.66E-07 | 1.70E-06 |
| ENSG0000 | response  | Inflamed | ROPN1L     | protein_cc    | chr5  | 10441636 | 10472141 | + | 1817  | 12.76134 | 0.159905 | -1.50479 | 0.205406 | -7.32591 | 6.47E-11 | 2.66E-07 | 1.70E-06 |
| ENSG0000 | response  | Inflamed | CHST2      | protein_cc    | chr3  | 1.43E+08 | 1.43E+08 | + | 3526  | 1500.232 | 0        | -1.49141 | 0.204105 | -7.30707 | 7.08E-11 | 2.66E-07 | 1.86E-06 |
| ENSG0000 | response  | Inflamed | TXNDC15    | protein_cc    | chr5  | 1.34E+08 | 1.34E+08 | + | 5265  | 1818.881 | 0        | -0.71221 | 0.099043 | -7.19093 | 1.24E-10 | 4.07E-07 | 3.26E-06 |
| ENSG0000 | response  | Inflamed | RP11-420I  | processed_chr | chr16 | 5289803  | 6826015  | + | 2019  | 9.508353 | 0.105012 | 1.077104 | 0.150479 | 7.15782  | 1.45E-10 | 4.25E-07 | 3.82E-06 |
| ENSG0000 | response  | Inflamed | C19orf59   | protein_cc    | chr19 | 7741514  | 7744712  | + | 1906  | 68.80191 | 0.221957 | -2.73257 | 0.386116 | -7.07706 | 2.14E-10 | 5.17E-07 | 5.63E-06 |
| ENSG0000 | response  | Inflamed | TNNC2      | protein_cc    | chr20 | 44451853 | 44462384 | - | 876   | 49.20286 | 0.019093 | 1.549815 | 0.219051 | 7.075125 | 2.16E-10 | 5.17E-07 | 5.68E-06 |
| ENSG0000 | response  | Inflamed | AC112721   | lincRNA       | chr2  | 2.38E+08 | 2.38E+08 | - | 541   | 4.224344 | 0.408115 | -1.20359 | 0.171355 | -7.02393 | 2.76E-10 | 5.89E-07 | 7.26E-06 |
| ENSG0000 | response  | Inflamed | RP11-443E  | lincRNA       | chr1  | 2.35E+08 | 2.35E+08 | - | 846   | 5.584726 | 0.212411 | -1.07868 | 0.154015 | -7.00372 | 3.04E-10 | 5.89E-07 | 8.00E-06 |
| ENSG0000 | response  | Inflamed | CHRD12     | protein_cc    | chr11 | 74407474 | 74442430 | - | 3073  | 621.5513 | 0.011933 | -2.77488 | 0.396576 | -6.99709 | 3.14E-10 | 5.89E-07 | 8.25E-06 |
| ENSG0000 | response  | Inflamed | CHI3L2     | protein_cc    | chr1  | 1.12E+08 | 1.12E+08 | + | 3295  | 372.3294 | 0        | -2.40214 | 0.344098 | -6.98096 | 3.39E-10 | 5.94E-07 | 8.91E-06 |
| ENSG0000 | response  | Inflamed | ICAM3      | protein_cc    | chr19 | 10444452 | 10450499 | - | 2950  | 2064.184 | 0        | -1.04467 | 0.150211 | -6.95466 | 3.84E-10 | 6.31E-07 | 1.01E-05 |
| ENSG0000 | response  | Inflamed | CTB-61M7   | lincRNA       | chr19 | 55402039 | 55402786 | + | 748   | 32.65632 | 0.312649 | -2.32936 | 0.336677 | -6.91866 | 4.56E-10 | 7.05E-07 | 1.20E-05 |
| ENSG0000 | response  | Inflamed | PIM2       | protein_cc    | chrX  | 48770459 | 48776301 | - | 2761  | 7614.1   | 0        | -1.63453 | 0.237166 | -6.89194 | 5.18E-10 | 7.36E-07 | 1.36E-05 |
| ENSG0000 | response  | Inflamed | AC016747   | processed_chr | chr2  | 61368732 | 61372104 | - | 3104  | 69.26253 | 0.002387 | -1.12357 | 0.163163 | -6.88621 | 5.32E-10 | 7.36E-07 | 1.40E-05 |
| ENSG0000 | response  | Inflamed | TPST2      | protein_cc    | chr22 | 26921458 | 26992681 | - | 3448  | 1234.384 | 0        | -0.79771 | 0.116399 | -6.85325 | 6.22E-10 | 7.79E-07 | 1.64E-05 |
| ENSG0000 | response  | Inflamed | LAT2       | protein_cc    | chr7  | 73613982 | 73644161 | + | 4542  | 804.0215 | 0        | -0.99979 | 0.146162 | -6.84029 | 6.62E-10 | 7.79E-07 | 1.74E-05 |
| ENSG0000 | response  | Inflamed | LILRA2     | protein_cc    | chr19 | 55084387 | 55099027 | + | 2622  | 162.8401 | 0.004773 | -1.89667 | 0.277291 | -6.84001 | 6.63E-10 | 7.79E-07 | 1.74E-05 |
| ENSG0000 | response  | Inflamed | RAC2       | protein_cc    | chr22 | 37621301 | 37640488 | - | 2532  | 2379.697 | 0        | -1.09094 | 0.159635 | -6.83394 | 6.82E-10 | 7.79E-07 | 1.79E-05 |
| ENSG0000 | response  | Inflamed | S100A9     | protein_cc    | chr1  | 1.53E+08 | 1.53E+08 | + | 577   | 4812.239 | 0        | -2.90493 | 0.426    | -6.81908 | 7.32E-10 | 8.01E-07 | 1.92E-05 |
| ENSG0000 | response  | Inflamed | FADS1      | protein_cc    | chr11 | 61567099 | 61596790 | - | 10228 | 770.42   | 0        | -1.43514 | 0.210838 | -6.80683 | 7.75E-10 | 8.15E-07 | 2.04E-05 |
| ENSG0000 | response  | Inflamed | RP11-290F  | lincRNA       | chr20 | 48884023 | 48896332 | + | 2451  | 238.5823 | 0        | -1.73268 | 0.255427 | -6.78349 | 8.66E-10 | 8.60E-07 | 2.28E-05 |
| ENSG0000 | response  | Inflamed | S100A8     | protein_cc    | chr1  | 1.53E+08 | 1.53E+08 | - | 1006  | 1747.105 | 0        | -3.30097 | 0.487318 | -6.77374 | 9.07E-10 | 8.60E-07 | 2.38E-05 |
| ENSG0000 | response  | Inflamed | TREML2     | protein_cc    | chr6  | 41158015 | 41168932 | - | 3302  | 216.315  | 0.00716  | -2.14739 | 0.317147 | -6.77094 | 9.19E-10 | 8.60E-07 | 2.41E-05 |
| ENSG0000 | response  | Inflamed | ALPL       | protein_cc    | chr1  | 21835858 | 21904905 | + | 3014  | 1299.1   | 0        | -2.01814 | 0.298357 | -6.76419 | 9.48E-10 | 8.60E-07 | 2.49E-05 |
| ENSG0000 | response  | Inflamed | FCN3       | protein_cc    | chr1  | 27695603 | 27701315 | - | 2167  | 72.77566 | 0.047733 | -1.96696 | 0.291144 | -6.75598 | 9.86E-10 | 8.64E-07 | 2.59E-05 |
| ENSG0000 | response  | Inflamed | FGR        | protein_cc    | chr1  | 27938575 | 27961788 | - | 3474  | 1172.723 | 0        | -1.59714 | 0.236843 | -6.74344 | 1.05E-09 | 8.64E-07 | 2.75E-05 |
| ENSG0000 | response  | Inflamed | MMP3       | protein_cc    | chr11 | 1.03E+08 | 1.03E+08 | - | 2048  | 6591.585 | 0        | -3.38613 | 0.50252  | -6.7383  | 1.07E-09 | 8.64E-07 | 2.82E-05 |
| ENSG0000 | response  | Inflamed | HK3        | protein_cc    | chr5  | 1.76E+08 | 1.76E+08 | - | 3290  | 564.2458 | 0        | -1.45962 | 0.216804 | -6.73242 | 1.10E-09 | 8.64E-07 | 2.90E-05 |

|                   |          |           |                  |          |          |   |       |          |          |          |          |          |          |          |          |
|-------------------|----------|-----------|------------------|----------|----------|---|-------|----------|----------|----------|----------|----------|----------|----------|----------|
| ENSG0000 response | Inflamed | C17orf96  | protein_cc chr17 | 36827961 | 36831187 | - | 3227  | 189.3771 | 0.002387 | -1.31821 | 0.195886 | -6.72948 | 1.12E-09 | 8.64E-07 | 2.94E-05 |
| ENSG0000 response | Inflamed | SLC11A1   | protein_cc chr2  | 2.19E+08 | 2.19E+08 | + | 8676  | 689.4368 | 0        | -2.51899 | 0.375613 | -6.70634 | 1.25E-09 | 9.19E-07 | 3.27E-05 |
| ENSG0000 response | Inflamed | AP001046  | lincRNA chr21    | 44778027 | 44782229 | - | 2798  | 88.71838 | 0.009547 | -1.55401 | 0.2318   | -6.70411 | 1.26E-09 | 9.19E-07 | 3.31E-05 |
| ENSG0000 response | Inflamed | DOK3      | protein_cc chr5  | 1.77E+08 | 1.77E+08 | - | 4821  | 1724.079 | 0        | -1.33688 | 0.200246 | -6.67618 | 1.44E-09 | 1.02E-06 | 3.77E-05 |
| ENSG0000 response | Inflamed | ACAN      | protein_cc chr15 | 89346674 | 89418585 | + | 10908 | 51.64678 | 0.078759 | -2.04543 | 0.308274 | -6.63509 | 1.74E-09 | 1.19E-06 | 4.58E-05 |
| ENSG0000 response | Inflamed | ICAM4     | protein_cc chr19 | 10397643 | 10399198 | + | 1427  | 66.53461 | 0        | -1.20648 | 0.181898 | -6.63274 | 1.76E-09 | 1.19E-06 | 4.63E-05 |
| ENSG0000 response | Inflamed | BASP1     | protein_cc chr5  | 17065707 | 17276943 | + | 2133  | 1786.964 | 0        | -1.52617 | 0.230486 | -6.62153 | 1.86E-09 | 1.20E-06 | 4.88E-05 |
| ENSG0000 response | Inflamed | PROK2     | protein_cc chr3  | 71820807 | 71834357 | - | 1612  | 324.9403 | 0.116945 | -3.34587 | 0.505485 | -6.61913 | 1.88E-09 | 1.20E-06 | 4.93E-05 |
| ENSG0000 response | Inflamed | SH2B2     | protein_cc chr7  | 1.02E+08 | 1.02E+08 | + | 2236  | 285.8067 | 0        | -1.10919 | 0.167904 | -6.60611 | 1.99E-09 | 1.21E-06 | 5.24E-05 |
| ENSG0000 response | Inflamed | PRG4      | protein_cc chr1  | 1.86E+08 | 1.86E+08 | + | 5050  | 6.859189 | 0.348449 | -1.24896 | 0.189125 | -6.60387 | 2.02E-09 | 1.21E-06 | 5.30E-05 |
| ENSG0000 response | Inflamed | RPS15AP1  | pseudoger chr1   | 45245998 | 45246387 | - | 390   | 9.582339 | 0.214797 | 1.161632 | 0.175921 | 6.603135 | 2.02E-09 | 1.21E-06 | 5.32E-05 |
| ENSG0000 response | Inflamed | SCGB2A1   | protein_cc chr11 | 61976140 | 61981408 | + | 518   | 62.34368 | 0.023866 | 1.776791 | 0.26941  | 6.59512  | 2.10E-09 | 1.23E-06 | 5.52E-05 |
| ENSG0000 response | Inflamed | S100A12   | protein_cc chr1  | 1.53E+08 | 1.53E+08 | - | 516   | 126.5871 | 0.24105  | -2.79562 | 0.425485 | -6.57043 | 2.36E-09 | 1.30E-06 | 6.20E-05 |
| ENSG0000 response | Inflamed | CDKN2B-A  | antisense chr9   | 21994777 | 22121096 | + | 4225  | 334.4702 | 0.002387 | 1.89368  | 0.288228 | 6.570079 | 2.36E-09 | 1.30E-06 | 6.21E-05 |
| ENSG0000 response | Inflamed | CEACAM4   | protein_cc chr19 | 42125344 | 42133442 | - | 1364  | 61.88067 | 0.02148  | -1.59801 | 0.243405 | -6.56523 | 2.41E-09 | 1.30E-06 | 6.35E-05 |
| ENSG0000 response | Inflamed | ALG1L13P  | pseudoger chr8   | 8093525  | 8102189  | - | 1447  | 22.48687 | 0.054893 | -1.50537 | 0.229332 | -6.56415 | 2.43E-09 | 1.30E-06 | 6.38E-05 |
| ENSG0000 response | Inflamed | RP11-557f | lincRNA chr6     | 1.35E+08 | 1.35E+08 | - | 1404  | 6.51074  | 0.159905 | -0.93912 | 0.143263 | -6.55523 | 2.53E-09 | 1.33E-06 | 6.65E-05 |
| ENSG0000 response | Inflamed | TNC       | protein_cc chr9  | 1.18E+08 | 1.18E+08 | - | 8687  | 13712.79 | 0        | -1.89683 | 0.290067 | -6.53929 | 2.73E-09 | 1.41E-06 | 7.17E-05 |
| ENSG0000 response | Inflamed | HEPACAM   | protein_cc chr7  | 92817899 | 92855837 | - | 2483  | 1672.499 | 0.002387 | 1.927639 | 0.296488 | 6.501578 | 3.25E-09 | 1.64E-06 | 8.54E-05 |
| ENSG0000 response | Inflamed | RP11-960L | lincRNA chr16    | 81771853 | 81801311 | + | 1772  | 32.60859 | 0.023866 | -1.37221 | 0.211309 | -6.49385 | 3.37E-09 | 1.65E-06 | 8.86E-05 |
| ENSG0000 response | Inflamed | SIL1      | protein_cc chr5  | 1.38E+08 | 1.39E+08 | - | 4011  | 1494.594 | 0        | -0.53635 | 0.082687 | -6.48653 | 3.49E-09 | 1.65E-06 | 9.16E-05 |
| ENSG0000 response | Inflamed | PILRA     | protein_cc chr7  | 99965153 | 99997719 | + | 2003  | 502.4702 | 0        | -1.17828 | 0.181687 | -6.48522 | 3.51E-09 | 1.65E-06 | 9.22E-05 |
| ENSG0000 response | Inflamed | CCM2      | protein_cc chr7  | 45039074 | 45116068 | + | 8196  | 2144.086 | 0        | -0.41896 | 0.064605 | -6.48502 | 3.51E-09 | 1.65E-06 | 9.23E-05 |
| ENSG0000 response | Inflamed | TNFRSF8   | protein_cc chr1  | 12123434 | 12204264 | + | 3738  | 102.315  | 0.011933 | -1.73613 | 0.268497 | -6.4661  | 3.83E-09 | 1.70E-06 | 0.000101 |
| ENSG0000 response | Inflamed | NLRP12    | protein_cc chr19 | 54296857 | 54327648 | - | 5100  | 70.80907 | 0.02148  | -2.01494 | 0.311714 | -6.46406 | 3.87E-09 | 1.70E-06 | 0.000102 |
| ENSG0000 response | Inflamed | SIGLEC9   | protein_cc chr19 | 51628165 | 51639908 | + | 2539  | 230.0048 | 0        | -1.17024 | 0.181181 | -6.45899 | 3.96E-09 | 1.70E-06 | 0.000104 |
| ENSG0000 response | Inflamed | GOS2      | protein_cc chr1  | 2.1E+08  | 2.1E+08  | + | 866   | 1130.01  | 0        | -2.22365 | 0.344297 | -6.45852 | 3.97E-09 | 1.70E-06 | 0.000104 |
| ENSG0000 response | Inflamed | ADA       | protein_cc chr20 | 43248163 | 43280874 | - | 2852  | 407.9666 | 0        | -1.03015 | 0.159574 | -6.4556  | 4.02E-09 | 1.70E-06 | 0.000106 |
| ENSG0000 response | Inflamed | PANX2     | protein_cc chr22 | 50609160 | 50618723 | + | 3102  | 44.45585 | 0.042959 | -1.75175 | 0.27176  | -6.44594 | 4.21E-09 | 1.70E-06 | 0.000111 |
| ENSG0000 response | Inflamed | DHRS11    | protein_cc chr17 | 34948228 | 34957235 | + | 5462  | 4695.227 | 0        | 1.286388 | 0.199626 | 6.443981 | 4.25E-09 | 1.70E-06 | 0.000112 |
| ENSG0000 response | Inflamed | BATF      | protein_cc chr14 | 75988768 | 76013358 | + | 980   | 225.3341 | 0        | -1.32739 | 0.206034 | -6.4426  | 4.28E-09 | 1.70E-06 | 0.000112 |
| ENSG0000 response | Inflamed | SELPLG    | protein_cc chr12 | 1.09E+08 | 1.09E+08 | - | 2843  | 1796.453 | 0        | -1.17957 | 0.183147 | -6.4406  | 4.32E-09 | 1.70E-06 | 0.000113 |
| ENSG0000 response | Inflamed | CAMK1G    | protein_cc chr1  | 2.1E+08  | 2.1E+08  | + | 2676  | 19.42243 | 0.128878 | -1.44023 | 0.223684 | -6.4387  | 4.35E-09 | 1.70E-06 | 0.000114 |
| ENSG0000 response | Inflamed | TREM1     | protein_cc chr6  | 41235664 | 41254457 | - | 4329  | 395.6802 | 0.047733 | -2.78737 | 0.432978 | -6.43766 | 4.37E-09 | 1.70E-06 | 0.000115 |
| ENSG0000 response | Inflamed | WAS       | protein_cc chrX  | 48534985 | 48549818 | + | 2381  | 1175.014 | 0        | -1.09905 | 0.170741 | -6.43697 | 4.39E-09 | 1.70E-06 | 0.000115 |
| ENSG0000 response | Inflamed | CCDC69    | protein_cc chr5  | 1.51E+08 | 1.51E+08 | - | 4993  | 3479.79  | 0        | -1.06944 | 0.166352 | -6.42877 | 4.56E-09 | 1.71E-06 | 0.00012  |
| ENSG0000 response | Inflamed | SYT3      | protein_cc chr19 | 51124564 | 51171651 | - | 3832  | 7.51074  | 0.193317 | -1.17213 | 0.182332 | -6.42853 | 4.56E-09 | 1.71E-06 | 0.00012  |
| ENSG0000 response | Inflamed | CYTH4     | protein_cc chr22 | 37678068 | 37711382 | + | 6157  | 2259.122 | 0        | -1.15022 | 0.179042 | -6.42433 | 4.65E-09 | 1.72E-06 | 0.000122 |
| ENSG0000 response | Inflamed | SLC2A6    | protein_cc chr9  | 1.36E+08 | 1.36E+08 | - | 3540  | 464.7566 | 0        | -1.22924 | 0.191477 | -6.41974 | 4.75E-09 | 1.72E-06 | 0.000125 |
| ENSG0000 response | Inflamed | KLK1      | protein_cc chr19 | 51322404 | 51327043 | - | 2378  | 2638.396 | 0        | 1.492338 | 0.2325   | 6.418649 | 4.78E-09 | 1.72E-06 | 0.000126 |

|                   |          |           |                  |          |          |   |       |          |          |          |          |          |          |          |          |
|-------------------|----------|-----------|------------------|----------|----------|---|-------|----------|----------|----------|----------|----------|----------|----------|----------|
| ENSG0000 response | Inflamed | CSF3      | protein_cc chr17 | 38171614 | 38174066 | + | 2220  | 562.5227 | 0.124105 | -3.50244 | 0.547343 | -6.39898 | 5.23E-09 | 1.85E-06 | 0.000138 |
| ENSG0000 response | Inflamed | ITGB2     | protein_cc chr21 | 46305868 | 46351904 | - | 6797  | 6183.776 | 0        | -1.08418 | 0.169492 | -6.39663 | 5.29E-09 | 1.85E-06 | 0.000139 |
| ENSG0000 response | Inflamed | GPR84     | protein_cc chr12 | 54756229 | 54758271 | - | 2043  | 132.6778 | 0.002387 | -1.94582 | 0.304531 | -6.38956 | 5.47E-09 | 1.89E-06 | 0.000144 |
| ENSG0000 response | Inflamed | KCNJ15    | protein_cc chr21 | 39529128 | 39679279 | + | 9685  | 223.6158 | 0.069212 | -2.64041 | 0.41356  | -6.38459 | 5.59E-09 | 1.91E-06 | 0.000147 |
| ENSG0000 response | Inflamed | NEURL     | protein_cc chr10 | 1.05E+08 | 1.05E+08 | + | 4961  | 1625.189 | 0        | 1.336928 | 0.209501 | 6.381485 | 5.68E-09 | 1.91E-06 | 0.000149 |
| ENSG0000 response | Inflamed | NCF1      | protein_cc chr7  | 74188309 | 74203659 | + | 3462  | 712.105  | 0        | -1.20184 | 0.188421 | -6.37851 | 5.75E-09 | 1.91E-06 | 0.000151 |
| ENSG0000 response | Inflamed | TRPV2     | protein_cc chr17 | 16318856 | 16340317 | + | 3414  | 1010.11  | 0        | -0.87671 | 0.137907 | -6.35723 | 6.35E-09 | 2.07E-06 | 0.000167 |
| ENSG0000 response | Inflamed | ORAI2     | protein_cc chr7  | 1.02E+08 | 1.02E+08 | + | 11098 | 2315.403 | 0        | -1.04638 | 0.164613 | -6.35658 | 6.37E-09 | 2.07E-06 | 0.000167 |
| ENSG0000 response | Inflamed | IGHG1     | IG_C_gene chr14  | 1.06E+08 | 1.06E+08 | - | 2762  | 647100.2 | 0        | -2.61684 | 0.41228  | -6.34725 | 6.65E-09 | 2.10E-06 | 0.000175 |
| ENSG0000 response | Inflamed | MMP7      | protein_cc chr11 | 1.02E+08 | 1.02E+08 | - | 2323  | 569.074  | 0.095465 | -3.19262 | 0.503366 | -6.34255 | 6.79E-09 | 2.10E-06 | 0.000179 |
| ENSG0000 response | Inflamed | HCK       | protein_cc chr20 | 30639991 | 30689659 | + | 3092  | 1886.279 | 0        | -1.09709 | 0.17301  | -6.34119 | 6.84E-09 | 2.10E-06 | 0.00018  |
| ENSG0000 response | Inflamed | IL5RA     | protein_cc chr3  | 3111233  | 3168297  | - | 3377  | 40.06205 | 0        | -1.38129 | 0.217841 | -6.34082 | 6.85E-09 | 2.10E-06 | 0.00018  |
| ENSG0000 response | Inflamed | GPR97     | protein_cc chr16 | 57702099 | 57723975 | + | 3593  | 656.5012 | 0        | -2.10007 | 0.331264 | -6.33955 | 6.89E-09 | 2.10E-06 | 0.000181 |
| ENSG0000 response | Inflamed | GLT1D1    | protein_cc chr12 | 1.29E+08 | 1.29E+08 | + | 3474  | 117.1695 | 0.078759 | -2.33285 | 0.368099 | -6.33757 | 6.95E-09 | 2.10E-06 | 0.000183 |
| ENSG0000 response | Inflamed | AQP9      | protein_cc chr15 | 58430368 | 58478110 | + | 3235  | 823.1742 | 0.073986 | -3.24013 | 0.511657 | -6.33263 | 7.11E-09 | 2.12E-06 | 0.000187 |
| ENSG0000 response | Inflamed | PDPN      | protein_cc chr1  | 13909960 | 13944452 | + | 3707  | 1462.289 | 0        | -1.52555 | 0.24118  | -6.32534 | 7.35E-09 | 2.17E-06 | 0.000193 |
| ENSG0000 response | Inflamed | BATF3     | protein_cc chr1  | 2.13E+08 | 2.13E+08 | - | 2713  | 129.3675 | 0        | -1.09878 | 0.173967 | -6.31601 | 7.68E-09 | 2.23E-06 | 0.000202 |
| ENSG0000 response | Inflamed | CD300C    | protein_cc chr17 | 72537247 | 72542282 | - | 1517  | 121.5776 | 0        | -1.12279 | 0.177807 | -6.31469 | 7.72E-09 | 2.23E-06 | 0.000203 |
| ENSG0000 response | Inflamed | MIXL1     | protein_cc chr1  | 2.26E+08 | 2.26E+08 | + | 2029  | 118.8663 | 0        | -1.54    | 0.244209 | -6.30609 | 8.04E-09 | 2.29E-06 | 0.000211 |
| ENSG0000 response | Inflamed | CTC-510F1 | 3prime_ov chr19  | 11411453 | 11435117 | - | 685   | 8.334129 | 0.288783 | -1.41404 | 0.224351 | -6.3028  | 8.16E-09 | 2.29E-06 | 0.000215 |
| ENSG0000 response | Inflamed | MARCO     | protein_cc chr2  | 1.2E+08  | 1.2E+08  | + | 2079  | 45.34845 | 0.124105 | -2.14589 | 0.340531 | -6.30162 | 8.20E-09 | 2.29E-06 | 0.000216 |
| ENSG0000 response | Inflamed | FCRLB     | protein_cc chr1  | 1.62E+08 | 1.62E+08 | + | 2592  | 55.11217 | 0.00716  | -1.41325 | 0.225004 | -6.28098 | 9.02E-09 | 2.50E-06 | 0.000237 |
| ENSG0000 response | Inflamed | MT-TM     | Mt_tRNA chrM     | 4402     | 4469     | + | 68    | 373.3413 | 0        | 1.071586 | 0.170772 | 6.274949 | 9.28E-09 | 2.52E-06 | 0.000244 |
| ENSG0000 response | Inflamed | RASGRP4   | protein_cc chr19 | 38899695 | 38916945 | - | 3848  | 421.7184 | 0        | -1.23267 | 0.196466 | -6.2742  | 9.31E-09 | 2.52E-06 | 0.000245 |
| ENSG0000 response | Inflamed | NCF2      | protein_cc chr1  | 1.84E+08 | 1.84E+08 | - | 2928  | 1259.494 | 0        | -1.35761 | 0.216678 | -6.26556 | 9.68E-09 | 2.57E-06 | 0.000255 |
| ENSG0000 response | Inflamed | MNX1-AS1  | antisense chr7   | 1.57E+08 | 1.57E+08 | + | 1041  | 19.8043  | 0.026253 | 1.003671 | 0.160246 | 6.263317 | 9.78E-09 | 2.57E-06 | 0.000257 |
| ENSG0000 response | Inflamed | NFE2      | protein_cc chr12 | 54685895 | 54694905 | - | 2469  | 159.4487 | 0.011933 | -2.17469 | 0.347306 | -6.2616  | 9.86E-09 | 2.57E-06 | 0.000259 |
| ENSG0000 response | Inflamed | ADH1C     | polymorpt chr4   | 1E+08    | 1E+08    | - | 1860  | 4661.227 | 0.002387 | 2.243521 | 0.358325 | 6.26113  | 9.88E-09 | 2.57E-06 | 0.00026  |
| ENSG0000 response | Inflamed | FCGR2A    | protein_cc chr1  | 1.61E+08 | 1.61E+08 | + | 5314  | 2114.695 | 0        | -1.40046 | 0.223845 | -6.2564  | 1.01E-08 | 2.60E-06 | 0.000266 |
| ENSG0000 response | Inflamed | FCGR2B    | protein_cc chr1  | 1.62E+08 | 1.62E+08 | + | 6996  | 491.3007 | 0        | -1.30952 | 0.209422 | -6.25304 | 1.03E-08 | 2.62E-06 | 0.00027  |
| ENSG0000 response | Inflamed | PPP1R18   | protein_cc chr6  | 30644166 | 30655672 | - | 4599  | 3992.143 | 0        | -1.05235 | 0.168422 | -6.24829 | 1.05E-08 | 2.64E-06 | 0.000276 |
| ENSG0000 response | Inflamed | RP11-134F | lincRNA chr1     | 2.03E+08 | 2.03E+08 | + | 837   | 7.548926 | 0.124105 | -1.02356 | 0.163851 | -6.24691 | 1.05E-08 | 2.64E-06 | 0.000277 |
| ENSG0000 response | Inflamed | COTL1     | protein_cc chr16 | 84599200 | 84651683 | - | 6742  | 8011.95  | 0        | -0.6383  | 0.102324 | -6.23807 | 1.10E-08 | 2.68E-06 | 0.000289 |
| ENSG0000 response | Inflamed | PTAFR     | protein_cc chr1  | 28473677 | 28520447 | - | 4706  | 1972.103 | 0        | -1.1162  | 0.178953 | -6.23736 | 1.10E-08 | 2.68E-06 | 0.00029  |
| ENSG0000 response | Inflamed | SLC7A5    | protein_cc chr16 | 87863629 | 87903094 | - | 4745  | 2536.912 | 0        | -1.34979 | 0.216422 | -6.23684 | 1.10E-08 | 2.68E-06 | 0.00029  |
| ENSG0000 response | Inflamed | SEMA4A    | protein_cc chr1  | 1.56E+08 | 1.56E+08 | + | 6676  | 1647.468 | 0        | -0.95442 | 0.153068 | -6.23527 | 1.11E-08 | 2.68E-06 | 0.000293 |
| ENSG0000 response | Inflamed | GUCY2D    | protein_cc chr17 | 7905912  | 7923657  | + | 4040  | 13.40334 | 0.045346 | -1.11632 | 0.179223 | -6.22869 | 1.15E-08 | 2.72E-06 | 0.000302 |
| ENSG0000 response | Inflamed | FAM124A   | protein_cc chr13 | 51796503 | 51858377 | + | 5288  | 134.8735 | 0        | -1.14369 | 0.183652 | -6.22746 | 1.15E-08 | 2.72E-06 | 0.000303 |
| ENSG0000 response | Inflamed | SYT7      | protein_cc chr11 | 61282785 | 61348620 | - | 5953  | 1333.243 | 0        | 1.049678 | 0.168586 | 6.226361 | 1.16E-08 | 2.72E-06 | 0.000305 |
| ENSG0000 response | Inflamed | CSF2      | protein_cc chr5  | 1.31E+08 | 1.31E+08 | + | 783   | 48.97136 | 0.143198 | -2.09499 | 0.336739 | -6.2214  | 1.19E-08 | 2.76E-06 | 0.000312 |

|                   |          |           |                  |          |          |   |       |          |          |          |          |          |          |          |          |
|-------------------|----------|-----------|------------------|----------|----------|---|-------|----------|----------|----------|----------|----------|----------|----------|----------|
| ENSG0000 response | Inflamed | LMO2      | protein_cc chr11 | 33880122 | 33913836 | - | 3109  | 576.3365 | 0        | -0.89113 | 0.143413 | -6.21371 | 1.23E-08 | 2.83E-06 | 0.000323 |
| ENSG0000 response | Inflamed | TXNDC11   | protein_cc chr16 | 11772936 | 11836734 | - | 4292  | 4994.864 | 0        | -0.55029 | 0.088622 | -6.20942 | 1.25E-08 | 2.86E-06 | 0.000329 |
| ENSG0000 response | Inflamed | MYO1F     | protein_cc chr19 | 8585674  | 8642461  | - | 8550  | 2720.11  | 0        | -1.0895  | 0.1755   | -6.20795 | 1.26E-08 | 2.86E-06 | 0.000332 |
| ENSG0000 response | Inflamed | CD44      | protein_cc chr11 | 35160417 | 35253949 | + | 10060 | 11319.93 | 0        | -0.98698 | 0.159048 | -6.20554 | 1.28E-08 | 2.86E-06 | 0.000335 |
| ENSG0000 response | Inflamed | CCL22     | protein_cc chr16 | 57392684 | 57400102 | + | 2929  | 548.4033 | 0        | -1.5847  | 0.255421 | -6.20429 | 1.28E-08 | 2.86E-06 | 0.000337 |
| ENSG0000 response | Inflamed | IL8       | protein_cc chr4  | 74606223 | 74609433 | + | 2274  | 1983.704 | 0.011933 | -3.04449 | 0.491506 | -6.19421 | 1.34E-08 | 2.97E-06 | 0.000353 |
| ENSG0000 response | Inflamed | FCAR      | protein_cc chr19 | 55385704 | 55401838 | + | 2366  | 97.68735 | 0.202864 | -2.55278 | 0.412289 | -6.19171 | 1.36E-08 | 2.98E-06 | 0.000357 |
| ENSG0000 response | Inflamed | OSCAR     | protein_cc chr19 | 54597933 | 54606000 | - | 2069  | 205.2005 | 0        | -1.24935 | 0.202107 | -6.18166 | 1.42E-08 | 3.09E-06 | 0.000374 |
| ENSG0000 response | Inflamed | PTPN7     | protein_cc chr1  | 2.02E+08 | 2.02E+08 | - | 5906  | 1321.575 | 0        | -0.98014 | 0.158734 | -6.17472 | 1.47E-08 | 3.16E-06 | 0.000386 |
| ENSG0000 response | Inflamed | RGS19     | protein_cc chr20 | 62704534 | 62711323 | - | 2010  | 818.6826 | 0        | -1.00013 | 0.162204 | -6.16585 | 1.53E-08 | 3.27E-06 | 0.000402 |
| ENSG0000 response | Inflamed | FAM101B   | protein_cc chr17 | 289769   | 295730   | - | 3621  | 1470.286 | 0        | -0.76234 | 0.123676 | -6.16398 | 1.54E-08 | 3.27E-06 | 0.000405 |
| ENSG0000 response | Inflamed | CAMK2N1   | protein_cc chr1  | 20808884 | 20812713 | - | 2615  | 5970.329 | 0        | 0.896538 | 0.145583 | 6.158239 | 1.58E-08 | 3.33E-06 | 0.000416 |
| ENSG0000 response | Inflamed | NCF4      | protein_cc chr22 | 37257030 | 37274057 | + | 1759  | 1365.578 | 0        | -0.84601 | 0.137565 | -6.1499  | 1.64E-08 | 3.43E-06 | 0.000432 |
| ENSG0000 response | Inflamed | FPR1      | protein_cc chr19 | 52248425 | 52307363 | - | 2594  | 870.6014 | 0.004773 | -2.65369 | 0.431802 | -6.14561 | 1.68E-08 | 3.47E-06 | 0.000441 |
| ENSG0000 response | Inflamed | JSRP1     | protein_cc chr19 | 2252251  | 2269758  | - | 1955  | 363.5036 | 0        | -1.66885 | 0.271698 | -6.14228 | 1.70E-08 | 3.49E-06 | 0.000448 |
| ENSG0000 response | Inflamed | ALOX5     | protein_cc chr10 | 45869661 | 45941561 | + | 3685  | 1629.709 | 0        | -1.10503 | 0.179934 | -6.14128 | 1.71E-08 | 3.49E-06 | 0.00045  |
| ENSG0000 response | Inflamed | LILRA5    | protein_cc chr19 | 54818353 | 54824409 | - | 1762  | 380.7303 | 0        | -1.74848 | 0.285044 | -6.13407 | 1.77E-08 | 3.55E-06 | 0.000465 |
| ENSG0000 response | Inflamed | AC147651  | antisense chr7   | 642822   | 648119   | + | 731   | 42.93317 | 0.004773 | -1.24734 | 0.203351 | -6.13392 | 1.77E-08 | 3.55E-06 | 0.000465 |
| ENSG0000 response | Inflamed | DEGS1     | protein_cc chr1  | 2.24E+08 | 2.24E+08 | + | 2515  | 1337.604 | 0        | -0.60858 | 0.09931  | -6.1281  | 1.82E-08 | 3.62E-06 | 0.000477 |
| ENSG0000 response | Inflamed | CHST15    | protein_cc chr10 | 1.26E+08 | 1.26E+08 | - | 5207  | 2135.704 | 0        | -1.22425 | 0.200164 | -6.11623 | 1.92E-08 | 3.74E-06 | 0.000504 |
| ENSG0000 response | Inflamed | AL512428  | miRNA chr6       | 24840195 | 24840293 | - | 99    | 3.756563 | 0.439141 | -1.04385 | 0.170804 | -6.11142 | 1.96E-08 | 3.74E-06 | 0.000515 |
| ENSG0000 response | Inflamed | LIPN      | protein_cc chr10 | 90521163 | 90537999 | + | 1197  | 7.47494  | 0.448687 | -1.50143 | 0.245702 | -6.11079 | 1.96E-08 | 3.74E-06 | 0.000517 |
| ENSG0000 response | Inflamed | CHST12    | protein_cc chr7  | 2443223  | 2474242  | + | 2211  | 678.0048 | 0        | -0.7074  | 0.11577  | -6.11044 | 1.97E-08 | 3.74E-06 | 0.000517 |
| ENSG0000 response | Inflamed | SPAG4     | protein_cc chr20 | 34203814 | 34208971 | + | 2240  | 327.0979 | 0        | -1.33477 | 0.218474 | -6.10955 | 1.98E-08 | 3.74E-06 | 0.000519 |
| ENSG0000 response | Inflamed | LILRB4    | protein_cc chr19 | 55155340 | 55181810 | + | 6475  | 1117.642 | 0        | -1.21492 | 0.198871 | -6.10908 | 1.98E-08 | 3.74E-06 | 0.000521 |
| ENSG0000 response | Inflamed | PORCN     | protein_cc chrX  | 48367350 | 48379202 | + | 3011  | 267.4033 | 0        | -0.53285 | 0.087231 | -6.10857 | 1.98E-08 | 3.74E-06 | 0.000522 |
| ENSG0000 response | Inflamed | EDEM2     | protein_cc chr20 | 33703167 | 33865928 | - | 3380  | 1535.439 | 0        | -0.36498 | 0.059758 | -6.10771 | 1.99E-08 | 3.74E-06 | 0.000524 |
| ENSG0000 response | Inflamed | PADI4     | protein_cc chr1  | 17634690 | 17690499 | + | 2971  | 92.25537 | 0.0358   | -2.08298 | 0.341239 | -6.10415 | 2.03E-08 | 3.75E-06 | 0.000532 |
| ENSG0000 response | Inflamed | CTSB      | protein_cc chr8  | 11700033 | 11726957 | - | 7438  | 37894.52 | 0        | -0.66478 | 0.108924 | -6.10318 | 2.03E-08 | 3.75E-06 | 0.000535 |
| ENSG0000 response | Inflamed | S1PR5     | protein_cc chr19 | 10623623 | 10628607 | - | 2601  | 38.53938 | 0.019093 | -1.30328 | 0.213617 | -6.101   | 2.05E-08 | 3.75E-06 | 0.00054  |
| ENSG0000 response | Inflamed | CCDC147   | antisense chr10  | 1.06E+08 | 1.06E+08 | - | 795   | 7.178998 | 0.26969  | -1.25868 | 0.206317 | -6.1007  | 2.06E-08 | 3.75E-06 | 0.000541 |
| ENSG0000 response | Inflamed | MYO1G     | protein_cc chr7  | 45002261 | 45018697 | - | 8653  | 1283.862 | 0        | -1.07319 | 0.175945 | -6.09957 | 2.07E-08 | 3.75E-06 | 0.000544 |
| ENSG0000 response | Inflamed | LINC00707 | lincRNA chr10    | 6821560  | 6884868  | + | 3070  | 5.582339 | 0.293556 | -1.19888 | 0.196604 | -6.09797 | 2.08E-08 | 3.75E-06 | 0.000548 |
| ENSG0000 response | Inflamed | BCL2A1    | protein_cc chr15 | 80253231 | 80263788 | - | 1089  | 439.747  | 0.002387 | -1.83782 | 0.301503 | -6.09552 | 2.11E-08 | 3.77E-06 | 0.000554 |
| ENSG0000 response | Inflamed | SIGLEC7   | protein_cc chr19 | 51645556 | 51656783 | + | 2043  | 181.0406 | 0        | -0.8526  | 0.139912 | -6.09387 | 2.12E-08 | 3.77E-06 | 0.000558 |
| ENSG0000 response | Inflamed | RINL      | protein_cc chr19 | 39358470 | 39368919 | - | 4205  | 412.3365 | 0        | -0.79125 | 0.1299   | -6.09121 | 2.15E-08 | 3.77E-06 | 0.000565 |
| ENSG0000 response | Inflamed | FKBP11    | protein_cc chr12 | 49315301 | 49320257 | - | 4957  | 3185.27  | 0        | -0.90142 | 0.148008 | -6.09036 | 2.16E-08 | 3.77E-06 | 0.000567 |
| ENSG0000 response | Inflamed | LRRC25    | protein_cc chr19 | 18501954 | 18508427 | - | 2415  | 718.7446 | 0        | -1.05168 | 0.172718 | -6.08898 | 2.17E-08 | 3.77E-06 | 0.00057  |
| ENSG0000 response | Inflamed | P4HA3     | protein_cc chr11 | 73946846 | 74022702 | - | 4009  | 82.90215 | 0.00716  | -1.97759 | 0.324835 | -6.088   | 2.18E-08 | 3.77E-06 | 0.000573 |
| ENSG0000 response | Inflamed | FAM162A   | protein_cc chr3  | 1.22E+08 | 1.22E+08 | + | 3793  | 2145.36  | 0        | 0.864456 | 0.142086 | 6.084052 | 2.22E-08 | 3.80E-06 | 0.000583 |

|                   |          |           |                  |          |          |   |       |          |          |          |          |          |          |          |          |
|-------------------|----------|-----------|------------------|----------|----------|---|-------|----------|----------|----------|----------|----------|----------|----------|----------|
| ENSG0000 response | Inflamed | TTC9      | protein_cc chr14 | 71108504 | 71142077 | + | 5217  | 443.1838 | 0        | -1.24143 | 0.204069 | -6.08339 | 2.23E-08 | 3.80E-06 | 0.000585 |
| ENSG0000 response | Inflamed | SPI1      | protein_cc chr11 | 47376411 | 47400127 | - | 2069  | 2341.384 | 0        | -1.08776 | 0.179    | -6.07688 | 2.29E-08 | 3.89E-06 | 0.000603 |
| ENSG0000 response | Inflamed | CD300LF   | protein_cc chr17 | 72690452 | 72709117 | - | 2159  | 320.673  | 0        | -0.81143 | 0.133586 | -6.07422 | 2.32E-08 | 3.91E-06 | 0.00061  |
| ENSG0000 response | Inflamed | CASC10    | protein_cc chr10 | 21781587 | 21786191 | - | 3801  | 33.46778 | 0.01432  | -1.13479 | 0.186979 | -6.06908 | 2.37E-08 | 3.97E-06 | 0.000624 |
| ENSG0000 response | Inflamed | FAM92B    | protein_cc chr16 | 85131965 | 85146114 | - | 1897  | 51.49881 | 0.042959 | -1.85369 | 0.305485 | -6.06803 | 2.39E-08 | 3.97E-06 | 0.000627 |
| ENSG0000 response | Inflamed | CD300E    | protein_cc chr17 | 72606026 | 72619897 | - | 3772  | 537.8711 | 0.011933 | -2.55409 | 0.421684 | -6.05689 | 2.51E-08 | 4.13E-06 | 0.00066  |
| ENSG0000 response | Inflamed | HCLS1     | protein_cc chr3  | 1.21E+08 | 1.21E+08 | - | 5093  | 2983.026 | 0        | -0.92349 | 0.152476 | -6.05661 | 2.51E-08 | 4.13E-06 | 0.000661 |
| ENSG0000 response | Inflamed | TAS1R3    | protein_cc chr1  | 1266694  | 1270686  | + | 3433  | 382.4224 | 0        | -1.50731 | 0.249043 | -6.05241 | 2.56E-08 | 4.18E-06 | 0.000673 |
| ENSG0000 response | Inflamed | CD300A    | protein_cc chr17 | 72462555 | 72480933 | + | 2684  | 717.0024 | 0        | -0.86116 | 0.142363 | -6.04907 | 2.60E-08 | 4.22E-06 | 0.000684 |
| ENSG0000 response | Inflamed | POU2AF1   | protein_cc chr11 | 1.11E+08 | 1.11E+08 | - | 7416  | 4964.644 | 0        | -1.4823  | 0.245183 | -6.04568 | 2.64E-08 | 4.26E-06 | 0.000694 |
| ENSG0000 response | Inflamed | TRPV4     | protein_cc chr12 | 1.1E+08  | 1.1E+08  | - | 3765  | 120.2721 | 0        | -1.1202  | 0.185409 | -6.04174 | 2.69E-08 | 4.28E-06 | 0.000707 |
| ENSG0000 response | Inflamed | RGS16     | protein_cc chr1  | 1.83E+08 | 1.83E+08 | - | 2427  | 281.432  | 0.002387 | -1.43806 | 0.238108 | -6.03952 | 2.71E-08 | 4.28E-06 | 0.000714 |
| ENSG0000 response | Inflamed | FUT7      | protein_cc chr9  | 1.4E+08  | 1.4E+08  | - | 2584  | 85.6611  | 0.009547 | -1.62083 | 0.268396 | -6.03896 | 2.72E-08 | 4.28E-06 | 0.000716 |
| ENSG0000 response | Inflamed | ZBTB32    | protein_cc chr19 | 36195429 | 36207940 | + | 2770  | 83.68974 | 0.004773 | -1.46611 | 0.242796 | -6.03844 | 2.73E-08 | 4.28E-06 | 0.000717 |
| ENSG0000 response | Inflamed | CD53      | protein_cc chr1  | 1.11E+08 | 1.11E+08 | + | 2081  | 2379.532 | 0        | -1.0389  | 0.172059 | -6.03801 | 2.73E-08 | 4.28E-06 | 0.000719 |
| ENSG0000 response | Inflamed | IL6       | protein_cc chr7  | 22765503 | 22771621 | + | 2711  | 203.0024 | 0.097852 | -2.605   | 0.431683 | -6.03452 | 2.78E-08 | 4.32E-06 | 0.00073  |
| ENSG0000 response | Inflamed | ZBED2     | protein_cc chr3  | 1.11E+08 | 1.11E+08 | - | 2311  | 41.57757 | 0.136038 | -1.78645 | 0.296531 | -6.02449 | 2.91E-08 | 4.49E-06 | 0.000764 |
| ENSG0000 response | Inflamed | LILRB3    | protein_cc chr19 | 54720147 | 54746602 | - | 4096  | 163.0143 | 0.00716  | -1.68132 | 0.27916  | -6.02277 | 2.93E-08 | 4.50E-06 | 0.00077  |
| ENSG0000 response | Inflamed | FCN1      | protein_cc chr9  | 1.38E+08 | 1.38E+08 | - | 1286  | 480.4439 | 0.002387 | -1.97165 | 0.328031 | -6.01057 | 3.09E-08 | 4.71E-06 | 0.000814 |
| ENSG0000 response | Inflamed | GUCA2B    | protein_cc chr1  | 42619092 | 42621495 | + | 597   | 1477.284 | 0.004773 | 2.562526 | 0.426348 | 6.010409 | 3.10E-08 | 4.71E-06 | 0.000814 |
| ENSG0000 response | Inflamed | EMILIN2   | protein_cc chr18 | 2847028  | 2915991  | + | 6435  | 1562.117 | 0        | -0.89625 | 0.149161 | -6.00861 | 3.12E-08 | 4.72E-06 | 0.000821 |
| ENSG0000 response | Inflamed | CR1       | protein_cc chr1  | 2.08E+08 | 2.08E+08 | + | 12164 | 568.1265 | 0        | -1.61709 | 0.269711 | -5.99565 | 3.31E-08 | 4.95E-06 | 0.00087  |
| ENSG0000 response | Inflamed | CSF3R     | protein_cc chr1  | 36931644 | 36948879 | - | 8426  | 3825.513 | 0        | -2.14563 | 0.357979 | -5.99375 | 3.34E-08 | 4.95E-06 | 0.000878 |
| ENSG0000 response | Inflamed | HCAR3     | protein_cc chr12 | 1.23E+08 | 1.23E+08 | - | 2137  | 822.642  | 0.0358   | -2.98253 | 0.497644 | -5.9933  | 3.35E-08 | 4.95E-06 | 0.00088  |
| ENSG0000 response | Inflamed | IL23A     | protein_cc chr12 | 56732663 | 56734193 | + | 1041  | 58.35322 | 0.019093 | -1.6372  | 0.273246 | -5.99166 | 3.37E-08 | 4.95E-06 | 0.000886 |
| ENSG0000 response | Inflamed | AC112721  | protein_cc chr2  | 2.38E+08 | 2.38E+08 | - | 588   | 1.856802 | 0.591885 | -0.78818 | 0.131562 | -5.99095 | 3.38E-08 | 4.95E-06 | 0.000889 |
| ENSG0000 response | Inflamed | RP11-16E1 | lincRNA chr15    | 31514202 | 31523041 | - | 1563  | 284.642  | 0        | -1.09142 | 0.182206 | -5.99001 | 3.40E-08 | 4.95E-06 | 0.000893 |
| ENSG0000 response | Inflamed | TMEM255   | protein_cc chr13 | 1.14E+08 | 1.15E+08 | + | 2242  | 134.8711 | 0        | -1.02845 | 0.17174  | -5.98843 | 3.42E-08 | 4.95E-06 | 0.000899 |
| ENSG0000 response | Inflamed | IFNAR2    | protein_cc chr21 | 34602206 | 34637980 | + | 4614  | 1695.186 | 0        | -0.73349 | 0.122506 | -5.9874  | 3.44E-08 | 4.95E-06 | 0.000903 |
| ENSG0000 response | Inflamed | HAVCR2    | protein_cc chr5  | 1.57E+08 | 1.57E+08 | - | 3804  | 394.3413 | 0        | -0.83767 | 0.139943 | -5.98583 | 3.46E-08 | 4.95E-06 | 0.00091  |
| ENSG0000 response | Inflamed | HRH2      | protein_cc chr5  | 1.75E+08 | 1.75E+08 | + | 4055  | 130.8998 | 0.02148  | -1.71183 | 0.286007 | -5.98529 | 3.47E-08 | 4.95E-06 | 0.000912 |
| ENSG0000 response | Inflamed | C19orf38  | protein_cc chr19 | 10947251 | 10980466 | + | 1565  | 155.2983 | 0        | -1.12649 | 0.188246 | -5.98415 | 3.49E-08 | 4.95E-06 | 0.000917 |
| ENSG0000 response | Inflamed | FPR2      | protein_cc chr19 | 52255279 | 52273779 | + | 3700  | 383.5131 | 0.0358   | -2.6372  | 0.440906 | -5.98131 | 3.53E-08 | 4.99E-06 | 0.000928 |
| ENSG0000 response | Inflamed | SPP1      | protein_cc chr4  | 88896819 | 88904562 | + | 2288  | 551.2959 | 0.004773 | -1.87573 | 0.313851 | -5.97649 | 3.61E-08 | 5.04E-06 | 0.000949 |
| ENSG0000 response | Inflamed | IL24      | protein_cc chr1  | 2.07E+08 | 2.07E+08 | + | 1979  | 152.3484 | 0.360382 | -3.19718 | 0.535002 | -5.97601 | 3.62E-08 | 5.04E-06 | 0.000951 |
| ENSG0000 response | Inflamed | PTP4A3    | protein_cc chr8  | 1.42E+08 | 1.42E+08 | + | 1943  | 1338.914 | 0        | -1.69569 | 0.283858 | -5.97373 | 3.65E-08 | 5.04E-06 | 0.000961 |
| ENSG0000 response | Inflamed | MT-CYB    | protein_cc chrM  | 14747    | 15887    | + | 1141  | 582371.6 | 0        | 0.637708 | 0.106778 | 5.972276 | 3.68E-08 | 5.04E-06 | 0.000967 |
| ENSG0000 response | Inflamed | ENG       | protein_cc chr9  | 1.31E+08 | 1.31E+08 | - | 3710  | 6547.759 | 0        | -1.09942 | 0.184122 | -5.97116 | 3.70E-08 | 5.04E-06 | 0.000972 |
| ENSG0000 response | Inflamed | NEB       | protein_cc chr2  | 1.52E+08 | 1.53E+08 | - | 30567 | 23.30072 | 0.040573 | -1.3675  | 0.229025 | -5.97095 | 3.70E-08 | 5.04E-06 | 0.000973 |
| ENSG0000 response | Inflamed | OSM       | protein_cc chr22 | 30658818 | 30662829 | - | 2114  | 887.6181 | 0.011933 | -2.60708 | 0.436642 | -5.97076 | 3.70E-08 | 5.04E-06 | 0.000974 |

|                   |          |           |                  |          |          |   |       |          |          |          |          |          |          |          |          |
|-------------------|----------|-----------|------------------|----------|----------|---|-------|----------|----------|----------|----------|----------|----------|----------|----------|
| ENSG0000 response | Inflamed | CHI3L1    | protein_cc chr1  | 2.03E+08 | 2.03E+08 | - | 3408  | 5806.971 | 0.002387 | -3.04695 | 0.510602 | -5.96737 | 3.76E-08 | 5.10E-06 | 0.000989 |
| ENSG0000 response | Inflamed | WDR54     | protein_cc chr2  | 74648805 | 74652882 | + | 2860  | 199.3556 | 0        | -0.67309 | 0.112827 | -5.96564 | 3.79E-08 | 5.11E-06 | 0.000996 |
| ENSG0000 response | Inflamed | EMR3      | protein_cc chr19 | 14729929 | 14800839 | - | 2837  | 147.7947 | 0        | -1.67085 | 0.280231 | -5.96239 | 3.85E-08 | 5.16E-06 | 0.001011 |
| ENSG0000 response | Inflamed | EMR2      | protein_cc chr19 | 14843205 | 14889353 | - | 8622  | 1545.389 | 0        | -1.31681 | 0.22097  | -5.95925 | 3.90E-08 | 5.19E-06 | 0.001025 |
| ENSG0000 response | Inflamed | CLEC5A    | protein_cc chr7  | 1.42E+08 | 1.42E+08 | - | 4129  | 82.06921 | 0.045346 | -2.11026 | 0.354186 | -5.95807 | 3.92E-08 | 5.19E-06 | 0.001031 |
| ENSG0000 response | Inflamed | ICAM1     | protein_cc chr19 | 10381511 | 10397291 | + | 3706  | 4256.539 | 0        | -1.37492 | 0.230784 | -5.95762 | 3.93E-08 | 5.19E-06 | 0.001033 |
| ENSG0000 response | Inflamed | IGHV3-15  | IG_V_gene chr14  | 1.07E+08 | 1.07E+08 | - | 437   | 15049.61 | 0        | -1.7658  | 0.29766  | -5.93228 | 4.40E-08 | 5.79E-06 | 0.001158 |
| ENSG0000 response | Inflamed | CTC-378H2 | antisense chr19  | 42656721 | 42661675 | + | 1955  | 22.49403 | 0.026253 | -1.15019 | 0.193957 | -5.93012 | 4.45E-08 | 5.81E-06 | 0.001169 |
| ENSG0000 response | Inflamed | LILRA3    | protein_cc chr19 | 54799854 | 54809952 | - | 1924  | 317.2888 | 0.023866 | -2.03899 | 0.34389  | -5.92918 | 4.47E-08 | 5.81E-06 | 0.001174 |
| ENSG0000 response | Inflamed | IL21R     | protein_cc chr16 | 27413483 | 27462115 | + | 4219  | 662.5274 | 0        | -1.39848 | 0.23627  | -5.919   | 4.67E-08 | 6.05E-06 | 0.001229 |
| ENSG0000 response | Inflamed | TNFRSF4   | protein_cc chr1  | 1146706  | 1149518  | - | 1721  | 339.5036 | 0        | -1.17794 | 0.199478 | -5.90511 | 4.97E-08 | 6.32E-06 | 0.001308 |
| ENSG0000 response | Inflamed | C17orf62  | protein_cc chr17 | 80400465 | 80408705 | - | 7234  | 4668.866 | 0        | -0.60103 | 0.101807 | -5.90367 | 5.01E-08 | 6.32E-06 | 0.001316 |
| ENSG0000 response | Inflamed | LINC00974 | lincRNA chr17    | 39705858 | 39710747 | - | 2141  | 33.99761 | 0.045346 | 1.405942 | 0.238172 | 5.903054 | 5.02E-08 | 6.32E-06 | 0.00132  |
| ENSG0000 response | Inflamed | NRROS     | protein_cc chr3  | 1.96E+08 | 1.96E+08 | + | 2910  | 453.6539 | 0        | -0.9421  | 0.159612 | -5.90246 | 5.03E-08 | 6.32E-06 | 0.001323 |
| ENSG0000 response | Inflamed | TNFRSF18  | protein_cc chr1  | 1138888  | 1142071  | - | 1370  | 294.1313 | 0        | -1.00297 | 0.169931 | -5.90222 | 5.04E-08 | 6.32E-06 | 0.001325 |
| ENSG0000 response | Inflamed | TIMP1     | protein_cc chrX  | 47441712 | 47446188 | + | 1790  | 9957.695 | 0        | -1.1489  | 0.194657 | -5.90218 | 5.04E-08 | 6.32E-06 | 0.001325 |
| ENSG0000 response | Inflamed | AJAP1     | protein_cc chr1  | 4714792  | 4852594  | + | 12405 | 106.7327 | 0.009547 | -1.65164 | 0.279908 | -5.90065 | 5.07E-08 | 6.32E-06 | 0.001334 |
| ENSG0000 response | Inflamed | S1PR4     | protein_cc chr19 | 3172344  | 3180329  | + | 1693  | 348.3938 | 0        | -1.35595 | 0.229803 | -5.9005  | 5.08E-08 | 6.32E-06 | 0.001335 |
| ENSG0000 response | Inflamed | GM2A      | protein_cc chr5  | 1.51E+08 | 1.51E+08 | + | 4479  | 3480.026 | 0        | -0.53957 | 0.091456 | -5.89975 | 5.10E-08 | 6.32E-06 | 0.00134  |
| ENSG0000 response | Inflamed | LILRB2    | protein_cc chr19 | 54777675 | 54785039 | - | 3810  | 1210.205 | 0        | -1.34607 | 0.228248 | -5.89739 | 5.15E-08 | 6.33E-06 | 0.001354 |
| ENSG0000 response | Inflamed | RAB40B    | protein_cc chr17 | 80612849 | 80656604 | - | 6194  | 803.2124 | 0        | 0.603775 | 0.102393 | 5.896641 | 5.17E-08 | 6.33E-06 | 0.001358 |
| ENSG0000 response | Inflamed | RP11-112L | lincRNA chr20    | 48780001 | 48782639 | - | 733   | 3.684964 | 0.336516 | -0.86706 | 0.147051 | -5.89629 | 5.18E-08 | 6.33E-06 | 0.001361 |
| ENSG0000 response | Inflamed | RP13-314C | antisense chrX   | 23791109 | 23801073 | - | 672   | 6.143198 | 0.212411 | -0.99625 | 0.169176 | -5.88885 | 5.35E-08 | 6.51E-06 | 0.001407 |
| ENSG0000 response | Inflamed | CD38      | protein_cc chr4  | 15779898 | 15854853 | + | 6855  | 1144.84  | 0        | -1.3865  | 0.235601 | -5.88495 | 5.44E-08 | 6.57E-06 | 0.001431 |
| ENSG0000 response | Inflamed | LILRA6    | protein_cc chr19 | 54720737 | 54746649 | - | 4190  | 337.8091 | 0        | -1.50838 | 0.256333 | -5.88445 | 5.46E-08 | 6.57E-06 | 0.001435 |
| ENSG0000 response | Inflamed | IFITM2    | protein_cc chr11 | 307631   | 315272   | + | 1307  | 4973.387 | 0        | -1.23479 | 0.20988  | -5.8833  | 5.48E-08 | 6.57E-06 | 0.001442 |
| ENSG0000 response | Inflamed | POU2F2    | protein_cc chr19 | 42590263 | 42700737 | - | 8899  | 1511.888 | 0        | -1.36213 | 0.231539 | -5.88293 | 5.49E-08 | 6.57E-06 | 0.001444 |
| ENSG0000 response | Inflamed | PRAM1     | protein_cc chr19 | 8554940  | 8567996  | - | 3763  | 132.7613 | 0        | -1.00997 | 0.17171  | -5.88182 | 5.52E-08 | 6.57E-06 | 0.001452 |
| ENSG0000 response | Inflamed | ARHGAP9   | protein_cc chr12 | 57866038 | 57882597 | - | 5127  | 1455.654 | 0        | -0.99538 | 0.169315 | -5.8789  | 5.59E-08 | 6.62E-06 | 0.001471 |
| ENSG0000 response | Inflamed | FAM20A    | protein_cc chr17 | 66531254 | 66597530 | - | 6203  | 504.2124 | 0        | -1.52389 | 0.259296 | -5.87701 | 5.64E-08 | 6.65E-06 | 0.001483 |
| ENSG0000 response | Inflamed | PNLIPRP2  | polymorpt chr10  | 1.18E+08 | 1.18E+08 | + | 1672  | 104.9976 | 0.085919 | 1.968185 | 0.335001 | 5.875166 | 5.69E-08 | 6.68E-06 | 0.001495 |
| ENSG0000 response | Inflamed | ST3GAL1   | protein_cc chr8  | 1.34E+08 | 1.35E+08 | - | 8730  | 2886.79  | 0        | -1.11091 | 0.189244 | -5.87028 | 5.81E-08 | 6.79E-06 | 0.001529 |
| ENSG0000 response | Inflamed | KYNU      | protein_cc chr2  | 1.44E+08 | 1.44E+08 | + | 3070  | 329.8353 | 0        | -1.81713 | 0.309632 | -5.86868 | 5.86E-08 | 6.81E-06 | 0.00154  |
| ENSG0000 response | Inflamed | RBP2      | protein_cc chr3  | 1.39E+08 | 1.39E+08 | - | 845   | 136.494  | 0.186158 | 2.175955 | 0.370967 | 5.865627 | 5.94E-08 | 6.88E-06 | 0.001561 |
| ENSG0000 response | Inflamed | CPNE5     | protein_cc chr6  | 36708552 | 36807778 | - | 4067  | 1716.451 | 0        | -0.96381 | 0.164361 | -5.86398 | 5.98E-08 | 6.90E-06 | 0.001572 |
| ENSG0000 response | Inflamed | PGF       | protein_cc chr14 | 75408537 | 75422487 | - | 5962  | 328.2267 | 0        | -1.25344 | 0.213857 | -5.86111 | 6.06E-08 | 6.95E-06 | 0.001592 |
| ENSG0000 response | Inflamed | CTB-43E15 | lincRNA chr5     | 1.73E+08 | 1.73E+08 | - | 1839  | 9.661098 | 0.329356 | -1.51685 | 0.258895 | -5.85893 | 6.12E-08 | 6.99E-06 | 0.001608 |
| ENSG0000 response | Inflamed | HSD11B1   | protein_cc chr1  | 2.1E+08  | 2.1E+08  | + | 1526  | 83.47255 | 0.011933 | -1.74909 | 0.298661 | -5.85643 | 6.19E-08 | 7.04E-06 | 0.001626 |
| ENSG0000 response | Inflamed | HSPA6     | protein_cc chr1  | 1.61E+08 | 1.61E+08 | + | 2646  | 306.5847 | 0        | -1.39267 | 0.237842 | -5.85544 | 6.21E-08 | 7.04E-06 | 0.001633 |
| ENSG0000 response | Inflamed | PTGIR     | protein_cc chr19 | 47123725 | 47128375 | - | 3546  | 231.2864 | 0        | -1.35795 | 0.231976 | -5.85383 | 6.26E-08 | 7.06E-06 | 0.001645 |

|                   |          |           |                  |          |          |   |       |          |          |          |          |          |          |          |          |
|-------------------|----------|-----------|------------------|----------|----------|---|-------|----------|----------|----------|----------|----------|----------|----------|----------|
| ENSG0000 response | Inflamed | IL2RA     | protein_cc chr10 | 6052652  | 6104288  | - | 3176  | 535.1193 | 0        | -1.28561 | 0.21999  | -5.84396 | 6.54E-08 | 7.34E-06 | 0.001719 |
| ENSG0000 response | Inflamed | SLC7A4    | protein_cc chr22 | 21383007 | 21387129 | - | 2447  | 156.284  | 0        | 1.303024 | 0.222994 | 5.843322 | 6.56E-08 | 7.34E-06 | 0.001724 |
| ENSG0000 response | Inflamed | CSF2RB    | protein_cc chr22 | 37309670 | 37336491 | + | 5061  | 4896.308 | 0        | -1.36759 | 0.234138 | -5.84094 | 6.63E-08 | 7.38E-06 | 0.001743 |
| ENSG0000 response | Inflamed | XBP1      | protein_cc chr22 | 29190543 | 29196585 | - | 3028  | 22224.73 | 0        | -0.90405 | 0.15483  | -5.83902 | 6.69E-08 | 7.40E-06 | 0.001758 |
| ENSG0000 response | Inflamed | RP11-689E | antisense chr12  | 1.09E+08 | 1.09E+08 | + | 859   | 31.35322 | 0.02864  | -1.29585 | 0.221949 | -5.83851 | 6.70E-08 | 7.40E-06 | 0.001762 |
| ENSG0000 response | Inflamed | KCNJ8     | protein_cc chr12 | 21917889 | 21928515 | - | 2484  | 119.2578 | 0        | -1.362   | 0.233376 | -5.83605 | 6.77E-08 | 7.45E-06 | 0.001781 |
| ENSG0000 response | Inflamed | SRGN      | protein_cc chr10 | 70847862 | 70864567 | + | 1220  | 3288.714 | 0        | -1.23694 | 0.212129 | -5.83106 | 6.93E-08 | 7.56E-06 | 0.001821 |
| ENSG0000 response | Inflamed | RILPL2    | protein_cc chr12 | 1.24E+08 | 1.24E+08 | - | 1435  | 516.969  | 0        | -0.74406 | 0.127618 | -5.83035 | 6.95E-08 | 7.56E-06 | 0.001827 |
| ENSG0000 response | Inflamed | CXCR1     | protein_cc chr2  | 2.19E+08 | 2.19E+08 | - | 2488  | 659.673  | 0.047733 | -2.97533 | 0.510428 | -5.82909 | 6.99E-08 | 7.56E-06 | 0.001837 |
| ENSG0000 response | Inflamed | TOR3A     | protein_cc chr1  | 1.79E+08 | 1.79E+08 | + | 3917  | 2074.301 | 0        | -0.53498 | 0.091787 | -5.82849 | 7.01E-08 | 7.56E-06 | 0.001842 |
| ENSG0000 response | Inflamed | LILRB1    | protein_cc chr19 | 55085346 | 55148979 | + | 5078  | 1084.678 | 0        | -1.22532 | 0.210243 | -5.82811 | 7.02E-08 | 7.56E-06 | 0.001845 |
| ENSG0000 response | Inflamed | GUCA2A    | protein_cc chr1  | 42628362 | 42630389 | - | 569   | 10387.05 | 0        | 2.648637 | 0.454677 | 5.825317 | 7.11E-08 | 7.63E-06 | 0.001868 |
| ENSG0000 response | Inflamed | SLC43A3   | protein_cc chr11 | 57174427 | 57195053 | - | 3664  | 533.5871 | 0        | -0.82856 | 0.142261 | -5.82422 | 7.14E-08 | 7.63E-06 | 0.001878 |
| ENSG0000 response | Inflamed | BNIP3     | protein_cc chr10 | 1.34E+08 | 1.34E+08 | - | 2111  | 232.4081 | 0        | -0.87567 | 0.150452 | -5.8203  | 7.27E-08 | 7.74E-06 | 0.001911 |
| ENSG0000 response | Inflamed | SELE      | protein_cc chr1  | 1.7E+08  | 1.7E+08  | - | 4586  | 368.895  | 0.02148  | -2.69473 | 0.463076 | -5.8192  | 7.30E-08 | 7.74E-06 | 0.00192  |
| ENSG0000 response | Inflamed | MIR4435-1 | lincRNA chr2     | 1.12E+08 | 1.12E+08 | - | 8500  | 381.7733 | 0        | -0.95837 | 0.164807 | -5.81508 | 7.44E-08 | 7.83E-06 | 0.001956 |
| ENSG0000 response | Inflamed | SIRPA     | protein_cc chr20 | 1875154  | 1920543  | + | 4032  | 3339.537 | 0        | -0.9396  | 0.161584 | -5.81491 | 7.44E-08 | 7.83E-06 | 0.001957 |
| ENSG0000 response | Inflamed | CFP       | protein_cc chrX  | 47483612 | 47489704 | - | 4576  | 473.4988 | 0        | -1.16881 | 0.201303 | -5.80622 | 7.74E-08 | 8.08E-06 | 0.002034 |
| ENSG0000 response | Inflamed | C16orf54  | protein_cc chr16 | 29753784 | 29757327 | - | 2585  | 606.716  | 0        | -0.92478 | 0.159309 | -5.80494 | 7.78E-08 | 8.08E-06 | 0.002046 |
| ENSG0000 response | Inflamed | APBB1IP   | protein_cc chr10 | 26727132 | 26856732 | + | 3981  | 1006.251 | 0        | -1.06935 | 0.18423  | -5.8044  | 7.80E-08 | 8.08E-06 | 0.002051 |
| ENSG0000 response | Inflamed | TM4SF5    | protein_cc chr17 | 4675179  | 4686506  | + | 930   | 289.5585 | 0.004773 | 1.310385 | 0.225761 | 5.804289 | 7.80E-08 | 8.08E-06 | 0.002052 |
| ENSG0000 response | Inflamed | GPSM3     | protein_cc chr6  | 32158543 | 32163300 | - | 1854  | 2022.683 | 0        | -0.8962  | 0.154426 | -5.80345 | 7.83E-08 | 8.08E-06 | 0.002059 |
| ENSG0000 response | Inflamed | IMPDH1    | protein_cc chr7  | 1.28E+08 | 1.28E+08 | - | 3662  | 2418.876 | 0        | -0.59517 | 0.102572 | -5.80252 | 7.87E-08 | 8.08E-06 | 0.002068 |
| ENSG0000 response | Inflamed | LCP2      | protein_cc chr5  | 1.7E+08  | 1.7E+08  | - | 7231  | 2017.652 | 0        | -1.02371 | 0.176496 | -5.80021 | 7.95E-08 | 8.09E-06 | 0.002089 |
| ENSG0000 response | Inflamed | VNN3      | protein_cc chr6  | 1.33E+08 | 1.33E+08 | - | 3846  | 37.42959 | 0.159905 | -1.90899 | 0.329165 | -5.7995  | 7.97E-08 | 8.09E-06 | 0.002096 |
| ENSG0000 response | Inflamed | FJX1      | protein_cc chr11 | 35639735 | 35642419 | + | 2685  | 159.9045 | 0.00716  | -1.48668 | 0.256349 | -5.79945 | 7.97E-08 | 8.09E-06 | 0.002096 |
| ENSG0000 response | Inflamed | CLEC6A    | protein_cc chr12 | 8608522  | 8630926  | + | 1682  | 9.28401  | 0.367542 | -1.42077 | 0.245209 | -5.79411 | 8.17E-08 | 8.26E-06 | 0.002147 |
| ENSG0000 response | Inflamed | FAM110D   | protein_cc chr1  | 26485511 | 26489119 | + | 1524  | 131.2005 | 0        | -1.00693 | 0.173942 | -5.78886 | 8.36E-08 | 8.42E-06 | 0.002198 |
| ENSG0000 response | Inflamed | AC021016  | processed_chr2   | 2.19E+08 | 2.19E+08 | - | 775   | 11.11217 | 0.042959 | -1.00304 | 0.173356 | -5.786   | 8.47E-08 | 8.49E-06 | 0.002226 |
| ENSG0000 response | Inflamed | IL1A      | protein_cc chr2  | 1.14E+08 | 1.14E+08 | - | 2124  | 100.8091 | 0.085919 | -1.9025  | 0.328953 | -5.78352 | 8.56E-08 | 8.56E-06 | 0.00225  |
| ENSG0000 response | Inflamed | TPBGL     | protein_cc chr11 | 74951950 | 74954742 | + | 2793  | 35.87112 | 0.01432  | -1.14726 | 0.198473 | -5.7804  | 8.68E-08 | 8.63E-06 | 0.002282 |
| ENSG0000 response | Inflamed | ARHGDI3   | protein_cc chr12 | 15094951 | 15114662 | - | 2102  | 4927.458 | 0        | -0.85746 | 0.148352 | -5.77992 | 8.70E-08 | 8.63E-06 | 0.002287 |
| ENSG0000 response | Inflamed | BCAT1     | protein_cc chr12 | 24964295 | 25102393 | - | 10372 | 237.4129 | 0        | -1.30264 | 0.225441 | -5.77819 | 8.76E-08 | 8.66E-06 | 0.002304 |
| ENSG0000 response | Inflamed | THEMIS2   | protein_cc chr1  | 28199055 | 28213196 | + | 4620  | 2307.726 | 0        | -1.05762 | 0.183232 | -5.77202 | 9.01E-08 | 8.87E-06 | 0.002368 |
| ENSG0000 response | Inflamed | FCGR3B    | protein_cc chr1  | 1.62E+08 | 1.62E+08 | - | 2964  | 927.5442 | 0.026253 | -2.88061 | 0.499259 | -5.76978 | 9.10E-08 | 8.93E-06 | 0.002392 |
| ENSG0000 response | Inflamed | MICB      | protein_cc chr6  | 31462658 | 31478901 | + | 2854  | 334.9141 | 0        | -0.77415 | 0.13428  | -5.76522 | 9.28E-08 | 9.07E-06 | 0.002441 |
| ENSG0000 response | Inflamed | SAMSN1    | protein_cc chr21 | 15857549 | 15955723 | - | 3152  | 549.5203 | 0        | -1.14258 | 0.198438 | -5.75787 | 9.59E-08 | 9.25E-06 | 0.002522 |
| ENSG0000 response | Inflamed | MFNG      | protein_cc chr22 | 37865101 | 37882439 | - | 3042  | 1092.742 | 0        | -0.63802 | 0.111081 | -5.75779 | 9.59E-08 | 9.25E-06 | 0.002523 |
| ENSG0000 response | Inflamed | NARF      | protein_cc chr17 | 80416056 | 80448413 | + | 7939  | 1648.599 | 0        | -0.39665 | 0.068889 | -5.75773 | 9.60E-08 | 9.25E-06 | 0.002523 |
| ENSG0000 response | Inflamed | ARL11     | protein_cc chr13 | 50202435 | 50208008 | + | 3826  | 130.7995 | 0        | -0.8022  | 0.139346 | -5.7569  | 9.63E-08 | 9.25E-06 | 0.002533 |



|                   |          |           |                  |          |            |      |          |          |          |          |          |          |          |          |
|-------------------|----------|-----------|------------------|----------|------------|------|----------|----------|----------|----------|----------|----------|----------|----------|
| ENSG0000 response | Inflamed | RGS14     | protein_cc chr5  | 1.77E+08 | 1.77E+08 + | 3797 | 869.2888 | 0        | -0.67472 | 0.117212 | -5.7564  | 9.65E-08 | 9.25E-06 | 0.002538 |
| ENSG0000 response | Inflamed | TNFAIP8L2 | protein_cc chr1  | 1.51E+08 | 1.51E+08 + | 1178 | 208.6778 | 0        | -0.78173 | 0.135816 | -5.75579 | 9.68E-08 | 9.25E-06 | 0.002545 |
| ENSG0000 response | Inflamed | MFSD4     | protein_cc chr1  | 2.06E+08 | 2.06E+08 + | 5570 | 1520.668 | 0        | 1.554237 | 0.270173 | 5.752759 | 9.81E-08 | 9.33E-06 | 0.002579 |
| ENSG0000 response | Inflamed | MEI1      | protein_cc chr22 | 42095503 | 42195460 + | 5412 | 619.0644 | 0        | -1.22212 | 0.212461 | -5.75221 | 9.84E-08 | 9.33E-06 | 0.002586 |
| ENSG0000 response | Inflamed | KIAA1199  | protein_cc chr15 | 81071684 | 81244117 + | 7621 | 4416.494 | 0.002387 | -2.35201 | 0.409005 | -5.75058 | 9.91E-08 | 9.37E-06 | 0.002604 |
| ENSG0000 response | Inflamed | OAZ2      | protein_cc chr15 | 64979772 | 64995480 - | 7671 | 2405.107 | 0        | -0.4743  | 0.0825   | -5.74907 | 9.97E-08 | 9.40E-06 | 0.002622 |
| ENSG0000 response | Inflamed | CTHRC1    | protein_cc chr8  | 1.04E+08 | 1.04E+08 + | 1776 | 311.5752 | 0        | -1.73615 | 0.302066 | -5.74756 | 1.00E-07 | 9.43E-06 | 0.00264  |
| ENSG0000 response | Inflamed | CYP27B1   | protein_cc chr12 | 58156117 | 58162769 - | 3440 | 140.6611 | 0        | -0.96536 | 0.168027 | -5.7453  | 1.01E-07 | 9.49E-06 | 0.002666 |
| ENSG0000 response | Inflamed | VAV1      | protein_cc chr19 | 6772725  | 6857377 +  | 4269 | 1151     | 0        | -0.86116 | 0.149921 | -5.74406 | 1.02E-07 | 9.51E-06 | 0.002681 |
| ENSG0000 response | Inflamed | TMEM132   | protein_cc chr11 | 60691935 | 60704631 + | 7271 | 1303.153 | 0        | -1.38692 | 0.241672 | -5.73886 | 1.04E-07 | 9.67E-06 | 0.002743 |
| ENSG0000 response | Inflamed | ACOXL     | protein_cc chr2  | 1.11E+08 | 1.12E+08 + | 5747 | 50.00955 | 0.004773 | -1.25581 | 0.218836 | -5.7386  | 1.04E-07 | 9.67E-06 | 0.002746 |
| ENSG0000 response | Inflamed | CA1       | protein_cc chr8  | 86239837 | 86291243 - | 4068 | 13359.33 | 0.004773 | 2.993346 | 0.52184  | 5.736135 | 1.06E-07 | 9.74E-06 | 0.002777 |
| ENSG0000 response | Inflamed | CEACAM2   | protein_cc chr19 | 42055886 | 42093197 + | 1926 | 104.4964 | 0.009547 | -0.94459 | 0.164743 | -5.73374 | 1.07E-07 | 9.81E-06 | 0.002806 |
| ENSG0000 response | Inflamed | MZB1      | protein_cc chr5  | 1.39E+08 | 1.39E+08 - | 2273 | 6434.499 | 0        | -1.51312 | 0.264064 | -5.73012 | 1.08E-07 | 9.89E-06 | 0.002851 |
| ENSG0000 response | Inflamed | RP11-8071 | pseudoger chr11  | 71883483 | 71889086 + | 829  | 4.205251 | 0.315036 | 0.874247 | 0.152584 | 5.729612 | 1.09E-07 | 9.89E-06 | 0.002858 |
| ENSG0000 response | Inflamed | P2RY6     | protein_cc chr11 | 72975550 | 73009662 + | 3976 | 454.9928 | 0        | -0.83453 | 0.145655 | -5.72952 | 1.09E-07 | 9.89E-06 | 0.002859 |
| ENSG0000 response | Inflamed | FES       | protein_cc chr15 | 91426925 | 91439006 + | 4241 | 918.358  | 0        | -0.77455 | 0.135266 | -5.7261  | 1.10E-07 | 1.00E-05 | 0.002903 |
| ENSG0000 response | Inflamed | RP11-234E | lincRNA chr12    | 4809583  | 4829268 -  | 1249 | 523.2458 | 0.00716  | 1.265011 | 0.22096  | 5.725065 | 1.11E-07 | 1.00E-05 | 0.002916 |
| ENSG0000 response | Inflamed | RP11-855C | lincRNA chr11    | 61355966 | 61375022 + | 2349 | 13.65155 | 0.169451 | 1.365667 | 0.238731 | 5.720533 | 1.13E-07 | 1.02E-05 | 0.002975 |
| ENSG0000 response | Inflamed | PPM1M     | protein_cc chr3  | 52279841 | 52284613 + | 3539 | 795.537  | 0        | -0.72626 | 0.127001 | -5.71853 | 1.14E-07 | 1.02E-05 | 0.003002 |
| ENSG0000 response | Inflamed | PTGES     | protein_cc chr9  | 1.33E+08 | 1.33E+08 - | 1896 | 176.2291 | 0        | -1.45741 | 0.254938 | -5.71672 | 1.15E-07 | 1.03E-05 | 0.003026 |
| ENSG0000 response | Inflamed | CCL18     | protein_cc chr17 | 34391640 | 34399392 + | 1397 | 1300.592 | 0        | -1.9023  | 0.332792 | -5.71617 | 1.15E-07 | 1.03E-05 | 0.003033 |
| ENSG0000 response | Inflamed | LINC00152 | lincRNA chr2     | 87754887 | 87906324 + | 3125 | 244.3461 | 0        | -1.20669 | 0.211156 | -5.7147  | 1.16E-07 | 1.03E-05 | 0.003053 |
| ENSG0000 response | Inflamed | FAM132B   | protein_cc chr2  | 2.39E+08 | 2.39E+08 + | 3572 | 128.1718 | 0.004773 | -1.81684 | 0.318063 | -5.7122  | 1.17E-07 | 1.04E-05 | 0.003087 |
| ENSG0000 response | Inflamed | IGHG3     | IG_C_gene chr14  | 1.06E+08 | 1.06E+08 - | 1268 | 109430.7 | 0        | -2.69033 | 0.471456 | -5.70643 | 1.20E-07 | 1.05E-05 | 0.003166 |
| ENSG0000 response | Inflamed | GMFG      | protein_cc chr19 | 39818993 | 39833012 - | 1490 | 584.327  | 0        | -0.97847 | 0.171489 | -5.70575 | 1.21E-07 | 1.05E-05 | 0.003176 |
| ENSG0000 response | Inflamed | LAMP3     | protein_cc chr3  | 1.83E+08 | 1.83E+08 - | 3816 | 756.2124 | 0        | -1.58862 | 0.278431 | -5.7056  | 1.21E-07 | 1.05E-05 | 0.003178 |
| ENSG0000 response | Inflamed | DCC       | protein_cc chr18 | 49866542 | 51057784 + | 8649 | 26.00239 | 0.133652 | -1.69604 | 0.297268 | -5.70542 | 1.21E-07 | 1.05E-05 | 0.003181 |
| ENSG0000 response | Inflamed | GPR114    | protein_cc chr16 | 57576333 | 57625593 + | 5852 | 699.3365 | 0        | -0.93322 | 0.163592 | -5.70454 | 1.21E-07 | 1.05E-05 | 0.003193 |
| ENSG0000 response | Inflamed | ITGAX     | protein_cc chr16 | 31366455 | 31394318 + | 6533 | 2691.093 | 0        | -1.48027 | 0.259524 | -5.7038  | 1.22E-07 | 1.05E-05 | 0.003203 |
| ENSG0000 response | Inflamed | INHBA     | protein_cc chr7  | 41724712 | 41742706 - | 7532 | 410.969  | 0.016706 | -2.28243 | 0.400176 | -5.70356 | 1.22E-07 | 1.05E-05 | 0.003207 |
| ENSG0000 response | Inflamed | PCK1      | protein_cc chr20 | 56136136 | 56141513 + | 5164 | 4598.964 | 0        | 2.739479 | 0.4805   | 5.701311 | 1.23E-07 | 1.06E-05 | 0.003239 |
| ENSG0000 response | Inflamed | MAPKAPK   | protein_cc chr1  | 2.07E+08 | 2.07E+08 + | 4195 | 7827.566 | 0        | -0.60582 | 0.106288 | -5.69977 | 1.24E-07 | 1.07E-05 | 0.003261 |
| ENSG0000 response | Inflamed | RGCC      | protein_cc chr13 | 42031695 | 42045018 + | 1032 | 507.1337 | 0        | -0.99219 | 0.17425  | -5.69407 | 1.27E-07 | 1.09E-05 | 0.003344 |
| ENSG0000 response | Inflamed | JAK3      | protein_cc chr19 | 17935589 | 17958880 - | 6813 | 2315.53  | 0        | -1.26751 | 0.222658 | -5.69262 | 1.28E-07 | 1.09E-05 | 0.003365 |
| ENSG0000 response | Inflamed | FRMD1     | protein_cc chr6  | 1.68E+08 | 1.68E+08 - | 5788 | 1189.621 | 0.00716  | 2.111337 | 0.371074 | 5.689801 | 1.30E-07 | 1.10E-05 | 0.003407 |
| ENSG0000 response | Inflamed | IGKV1-5   | IG_V_gene chr2   | 89246819 | 89247475 - | 532  | 33498.81 | 0        | -1.6693  | 0.293486 | -5.68782 | 1.31E-07 | 1.11E-05 | 0.003437 |
| ENSG0000 response | Inflamed | PNOC      | protein_cc chr8  | 28174503 | 28200872 + | 2126 | 246.0573 | 0        | -1.42234 | 0.250351 | -5.68139 | 1.35E-07 | 1.14E-05 | 0.003536 |
| ENSG0000 response | Inflamed | SLA       | protein_cc chr8  | 1.34E+08 | 1.34E+08 - | 7633 | 1209.224 | 0        | -1.06867 | 0.188132 | -5.68044 | 1.35E-07 | 1.14E-05 | 0.003551 |
| ENSG0000 response | Inflamed | IGKV3-11  | IG_V_gene chr2   | 89326668 | 89327228 - | 392  | 33944.01 | 0        | -1.62082 | 0.28538  | -5.67951 | 1.36E-07 | 1.14E-05 | 0.003566 |

|                   |          |           |                  |          |          |   |       |          |          |          |          |          |          |          |          |
|-------------------|----------|-----------|------------------|----------|----------|---|-------|----------|----------|----------|----------|----------|----------|----------|----------|
| ENSG0000 response | Inflamed | SASH3     | protein_cc chrX  | 1.29E+08 | 1.29E+08 | + | 2711  | 2292.246 | 0        | -0.92051 | 0.162102 | -5.67859 | 1.36E-07 | 1.14E-05 | 0.00358  |
| ENSG0000 response | Inflamed | GSTO2     | protein_cc chr10 | 1.06E+08 | 1.06E+08 | + | 10344 | 548.5131 | 0        | 0.754087 | 0.132798 | 5.678468 | 1.36E-07 | 1.14E-05 | 0.003582 |
| ENSG0000 response | Inflamed | VIPR1     | protein_cc chr3  | 42530791 | 42579059 | + | 7378  | 4176.878 | 0        | 1.451278 | 0.25576  | 5.674384 | 1.39E-07 | 1.15E-05 | 0.003647 |
| ENSG0000 response | Inflamed | RP11-65J3 | lincRNA chr9     | 1.32E+08 | 1.32E+08 | + | 1594  | 52.17661 | 0        | -1.01043 | 0.178111 | -5.67304 | 1.40E-07 | 1.16E-05 | 0.003669 |
| ENSG0000 response | Inflamed | AC079325  | pseudoger chr17  | 72556855 | 72563482 | - | 501   | 9.143198 | 0.350835 | -1.37647 | 0.242671 | -5.67217 | 1.40E-07 | 1.16E-05 | 0.003683 |
| ENSG0000 response | Inflamed | FIBIN     | protein_cc chr11 | 27015628 | 27018630 | + | 3003  | 330.2697 | 0        | -1.47905 | 0.260813 | -5.6709  | 1.41E-07 | 1.16E-05 | 0.003703 |
| ENSG0000 response | Inflamed | SIRPB1    | protein_cc chr20 | 1544167  | 1600707  | - | 6091  | 299.5322 | 0        | -1.49222 | 0.263159 | -5.67043 | 1.41E-07 | 1.16E-05 | 0.003711 |
| ENSG0000 response | Inflamed | AP000695  | antisense chr21  | 37818029 | 37904706 | + | 1178  | 3.832936 | 0.400955 | -0.99481 | 0.17549  | -5.66878 | 1.42E-07 | 1.16E-05 | 0.003738 |
| ENSG0000 response | Inflamed | LOXL2     | protein_cc chr8  | 23154702 | 23282841 | - | 5707  | 3418.432 | 0        | -1.20523 | 0.212755 | -5.66488 | 1.45E-07 | 1.18E-05 | 0.003803 |
| ENSG0000 response | Inflamed | KCNE1     | protein_cc chr21 | 35818988 | 35884573 | - | 5647  | 24.22912 | 0.038186 | -1.19245 | 0.210932 | -5.65324 | 1.52E-07 | 1.24E-05 | 0.004003 |
| ENSG0000 response | Inflamed | F5        | protein_cc chr1  | 1.69E+08 | 1.7E+08  | - | 7158  | 229.1671 | 0.004773 | -1.42469 | 0.252023 | -5.65303 | 1.52E-07 | 1.24E-05 | 0.004006 |
| ENSG0000 response | Inflamed | TUBB6     | protein_cc chr18 | 12307668 | 12344319 | + | 4117  | 1371.549 | 0        | -0.95663 | 0.169488 | -5.64422 | 1.58E-07 | 1.28E-05 | 0.004165 |
| ENSG0000 response | Inflamed | PTPN6     | protein_cc chr12 | 7055631  | 7070479  | + | 5009  | 3466.833 | 0        | -0.58096 | 0.103153 | -5.632   | 1.67E-07 | 1.35E-05 | 0.004394 |
| ENSG0000 response | Inflamed | FCRL5     | protein_cc chr1  | 1.57E+08 | 1.58E+08 | - | 12440 | 2319.776 | 0        | -1.57348 | 0.279485 | -5.62992 | 1.69E-07 | 1.36E-05 | 0.004435 |
| ENSG0000 response | Inflamed | CTB-114C7 | lincRNA chr5     | 1.7E+08  | 1.7E+08  | - | 2182  | 10.54177 | 0.21957  | -1.37368 | 0.244121 | -5.62707 | 1.71E-07 | 1.36E-05 | 0.00449  |
| ENSG0000 response | Inflamed | MAPK11    | protein_cc chr22 | 50702142 | 50709196 | - | 3321  | 350.1002 | 0        | -1.0892  | 0.193583 | -5.62654 | 1.71E-07 | 1.36E-05 | 0.004501 |
| ENSG0000 response | Inflamed | CECR6     | protein_cc chr22 | 17597189 | 17602257 | - | 5069  | 64.95943 | 0.00716  | -1.03351 | 0.183687 | -5.62647 | 1.71E-07 | 1.36E-05 | 0.004502 |
| ENSG0000 response | Inflamed | SPATA20P  | pseudoger chr21  | 39610149 | 39610586 | - | 438   | 2.682578 | 0.687351 | -1.10086 | 0.195718 | -5.62474 | 1.73E-07 | 1.37E-05 | 0.004537 |
| ENSG0000 response | Inflamed | FMNL1     | protein_cc chr17 | 43298811 | 43324687 | + | 7563  | 2862.728 | 0        | -1.13168 | 0.201206 | -5.62447 | 1.73E-07 | 1.37E-05 | 0.004542 |
| ENSG0000 response | Inflamed | HCAR2     | protein_cc chr12 | 1.23E+08 | 1.23E+08 | - | 2051  | 522.4296 | 0.011933 | -2.40505 | 0.427958 | -5.61981 | 1.76E-07 | 1.39E-05 | 0.004636 |
| ENSG0000 response | Inflamed | RP11-47G7 | pseudoger chr10  | 1.26E+08 | 1.26E+08 | - | 525   | 7.331742 | 0.210024 | -1.1276  | 0.200669 | -5.6192  | 1.77E-07 | 1.39E-05 | 0.004648 |
| ENSG0000 response | Inflamed | SIGLEC10  | protein_cc chr19 | 51913275 | 51921057 | - | 3667  | 1314.695 | 0        | -0.84976 | 0.151253 | -5.6181  | 1.78E-07 | 1.39E-05 | 0.004671 |
| ENSG0000 response | Inflamed | LIMK1     | protein_cc chr7  | 73497263 | 73536855 | + | 6902  | 1914.938 | 0        | -0.64625 | 0.115042 | -5.61755 | 1.78E-07 | 1.39E-05 | 0.004682 |
| ENSG0000 response | Inflamed | CHP2      | protein_cc chr16 | 23765948 | 23770272 | + | 2382  | 5338.893 | 0.004773 | 1.938635 | 0.345112 | 5.617412 | 1.78E-07 | 1.39E-05 | 0.004685 |
| ENSG0000 response | Inflamed | SH2D2A    | protein_cc chr1  | 1.57E+08 | 1.57E+08 | - | 2512  | 315.716  | 0        | -0.72936 | 0.129842 | -5.61731 | 1.78E-07 | 1.39E-05 | 0.004687 |
| ENSG0000 response | Inflamed | RP11-107C | protein_cc chr14 | 95982473 | 95984248 | + | 993   | 60.642   | 0.009547 | -1.4626  | 0.260423 | -5.61625 | 1.79E-07 | 1.39E-05 | 0.004709 |
| ENSG0000 response | Inflamed | ADAM8     | protein_cc chr10 | 1.35E+08 | 1.35E+08 | - | 4780  | 1523.549 | 0        | -1.29869 | 0.231346 | -5.61362 | 1.81E-07 | 1.40E-05 | 0.004763 |
| ENSG0000 response | Inflamed | CYTIP     | protein_cc chr2  | 1.58E+08 | 1.58E+08 | - | 3428  | 757.3556 | 0        | -1.0782  | 0.192151 | -5.6112  | 1.83E-07 | 1.40E-05 | 0.004814 |
| ENSG0000 response | Inflamed | CXCR2     | protein_cc chr2  | 2.19E+08 | 2.19E+08 | + | 3231  | 690.4177 | 0.00716  | -2.60876 | 0.464924 | -5.61115 | 1.83E-07 | 1.40E-05 | 0.004815 |
| ENSG0000 response | Inflamed | IGHG4     | IG_C_gene chr14  | 1.06E+08 | 1.06E+08 | - | 1110  | 20595.28 | 0        | -2.40111 | 0.42794  | -5.61086 | 1.83E-07 | 1.40E-05 | 0.004821 |
| ENSG0000 response | Inflamed | MILR1     | protein_cc chr17 | 62461569 | 62464760 | + | 920   | 72.11933 | 0        | -0.79825 | 0.142273 | -5.61069 | 1.84E-07 | 1.40E-05 | 0.004825 |
| ENSG0000 response | Inflamed | CCR1      | protein_cc chr3  | 46243200 | 46249887 | - | 2731  | 700.3747 | 0        | -1.12119 | 0.199834 | -5.61062 | 1.84E-07 | 1.40E-05 | 0.004826 |
| ENSG0000 response | Inflamed | CLDN23    | protein_cc chr8  | 8559448  | 8561616  | + | 2169  | 671.3771 | 0        | 0.957068 | 0.170593 | 5.610251 | 1.84E-07 | 1.40E-05 | 0.004834 |
| ENSG0000 response | Inflamed | AC096579  | processed_chr2   | 89130700 | 89165653 | - | 1424  | 751.389  | 0        | -1.38133 | 0.24636  | -5.60697 | 1.87E-07 | 1.41E-05 | 0.004904 |
| ENSG0000 response | Inflamed | C16orf74  | protein_cc chr16 | 85723690 | 85784735 | - | 2181  | 90.44153 | 0        | -0.9527  | 0.169982 | -5.60468 | 1.88E-07 | 1.41E-05 | 0.004954 |
| ENSG0000 response | Inflamed | KLF4      | protein_cc chr9  | 1.1E+08  | 1.1E+08  | - | 3539  | 11676.52 | 0        | 0.969735 | 0.173024 | 5.604613 | 1.88E-07 | 1.41E-05 | 0.004955 |
| ENSG0000 response | Inflamed | RHOH      | protein_cc chr4  | 40192673 | 40248587 | + | 6594  | 488.5036 | 0        | -1.19547 | 0.213302 | -5.60459 | 1.88E-07 | 1.41E-05 | 0.004956 |
| ENSG0000 response | Inflamed | WNT2      | protein_cc chr7  | 1.17E+08 | 1.17E+08 | - | 3005  | 114.8115 | 0.312649 | -2.58034 | 0.460436 | -5.60411 | 1.89E-07 | 1.41E-05 | 0.004966 |
| ENSG0000 response | Inflamed | LAPTM5    | protein_cc chr1  | 31205316 | 31230667 | - | 3274  | 9853.138 | 0        | -0.78456 | 0.140002 | -5.60392 | 1.89E-07 | 1.41E-05 | 0.00497  |
| ENSG0000 response | Inflamed | CXCL1     | protein_cc chr4  | 74735110 | 74736959 | + | 1296  | 4821.072 | 0        | -2.14594 | 0.382987 | -5.60317 | 1.90E-07 | 1.41E-05 | 0.004987 |

|                   |          |           |                  |          |          |   |      |          |          |          |          |          |          |          |          |
|-------------------|----------|-----------|------------------|----------|----------|---|------|----------|----------|----------|----------|----------|----------|----------|----------|
| ENSG0000 response | Inflamed | MEGF11    | protein_cc chr15 | 66187417 | 66546085 | - | 9365 | 10.24582 | 0.210024 | -1.32233 | 0.236106 | -5.60056 | 1.92E-07 | 1.42E-05 | 0.005044 |
| ENSG0000 response | Inflamed | AC093818  | antisense chr2   | 1.73E+08 | 1.73E+08 | - | 2447 | 130.2578 | 0        | -1.05309 | 0.188141 | -5.59733 | 1.95E-07 | 1.44E-05 | 0.005116 |
| ENSG0000 response | Inflamed | CST7      | protein_cc chr20 | 24929866 | 24940564 | + | 930  | 488.6277 | 0        | -1.13173 | 0.202278 | -5.59494 | 1.97E-07 | 1.45E-05 | 0.00517  |
| ENSG0000 response | Inflamed | TTC7B     | protein_cc chr14 | 91006932 | 91282823 | - | 5244 | 321.1504 | 0        | -0.76916 | 0.137498 | -5.59395 | 1.97E-07 | 1.45E-05 | 0.005192 |
| ENSG0000 response | Inflamed | GSDMC     | protein_cc chr8  | 1.31E+08 | 1.31E+08 | - | 2934 | 24.41289 | 0.095465 | -1.42002 | 0.253934 | -5.59207 | 1.99E-07 | 1.46E-05 | 0.005235 |
| ENSG0000 response | Inflamed | CHST11    | protein_cc chr12 | 1.05E+08 | 1.05E+08 | + | 6492 | 1171.229 | 0        | -1.02107 | 0.182662 | -5.58996 | 2.01E-07 | 1.47E-05 | 0.005283 |
| ENSG0000 response | Inflamed | LINC00211 | lincRNA chr2     | 38053390 | 38103417 | - | 2595 | 3.556086 | 0.594272 | -1.03745 | 0.185665 | -5.58777 | 2.03E-07 | 1.48E-05 | 0.005334 |
| ENSG0000 response | Inflamed | ARPC1B    | protein_cc chr7  | 98971872 | 98992424 | + | 3979 | 5711.695 | 0        | -0.43339 | 0.077615 | -5.58381 | 2.06E-07 | 1.50E-05 | 0.005428 |
| ENSG0000 response | Inflamed | VNN2      | protein_cc chr6  | 1.33E+08 | 1.33E+08 | - | 2633 | 414.8616 | 0        | -1.69741 | 0.304098 | -5.58178 | 2.08E-07 | 1.51E-05 | 0.005476 |
| ENSG0000 response | Inflamed | TMEM98    | protein_cc chr17 | 31254928 | 31272124 | + | 5187 | 2284.695 | 0        | 0.61067  | 0.109453 | 5.579293 | 2.11E-07 | 1.52E-05 | 0.005536 |
| ENSG0000 response | Inflamed | IGKV1-39  | IG_V_gene chr2   | 89619383 | 89619904 | - | 398  | 726.0263 | 0        | -1.75573 | 0.315124 | -5.57156 | 2.18E-07 | 1.56E-05 | 0.005726 |
| ENSG0000 response | Inflamed | SYTL3     | protein_cc chr6  | 1.59E+08 | 1.59E+08 | + | 2790 | 306.3747 | 0        | -0.69373 | 0.124523 | -5.5711  | 2.18E-07 | 1.56E-05 | 0.005738 |
| ENSG0000 response | Inflamed | VIM       | protein_cc chr10 | 17270258 | 17279592 | + | 4965 | 27974.55 | 0        | -0.88335 | 0.158564 | -5.57096 | 2.18E-07 | 1.56E-05 | 0.005741 |
| ENSG0000 response | Inflamed | EHD3      | protein_cc chr2  | 31456880 | 31492313 | + | 4959 | 729.7136 | 0        | -1.03196 | 0.185253 | -5.57055 | 2.19E-07 | 1.56E-05 | 0.005751 |
| ENSG0000 response | Inflamed | VSTM2A    | protein_cc chr7  | 54610018 | 54638773 | + | 5967 | 212.6754 | 0.038186 | 2.229817 | 0.400308 | 5.570257 | 2.19E-07 | 1.56E-05 | 0.005759 |
| ENSG0000 response | Inflamed | RP11-325F | lincRNA chr7     | 1.05E+08 | 1.05E+08 | + | 1034 | 65.37232 | 0        | -0.76523 | 0.137386 | -5.56993 | 2.19E-07 | 1.56E-05 | 0.005767 |
| ENSG0000 response | Inflamed | CTB-43E15 | lincRNA chr5     | 1.73E+08 | 1.73E+08 | - | 2815 | 41.52029 | 0.085919 | -1.78454 | 0.320405 | -5.56966 | 2.20E-07 | 1.56E-05 | 0.005774 |
| ENSG0000 response | Inflamed | EPHX2     | protein_cc chr8  | 27348296 | 27403081 | + | 4473 | 2283.286 | 0        | 0.961737 | 0.172675 | 5.569639 | 2.20E-07 | 1.56E-05 | 0.005774 |
| ENSG0000 response | Inflamed | MMP10     | protein_cc chr11 | 1.03E+08 | 1.03E+08 | - | 1758 | 597.673  | 0.009547 | -2.3642  | 0.424591 | -5.56817 | 2.21E-07 | 1.56E-05 | 0.005811 |
| ENSG0000 response | Inflamed | TUBB3     | protein_cc chr16 | 89987800 | 90005169 | + | 6138 | 35.39379 | 0.019093 | -1.23025 | 0.220992 | -5.56695 | 2.22E-07 | 1.57E-05 | 0.005842 |
| ENSG0000 response | Inflamed | CLEC4D    | protein_cc chr12 | 8662071  | 8674962  | + | 2013 | 31.95465 | 0.26253  | -1.89889 | 0.3412   | -5.56534 | 2.24E-07 | 1.57E-05 | 0.005884 |
| ENSG0000 response | Inflamed | CTSL      | protein_cc chr9  | 90340434 | 90346308 | + | 2366 | 2232.069 | 0        | -0.87367 | 0.157023 | -5.56396 | 2.25E-07 | 1.57E-05 | 0.005919 |
| ENSG0000 response | Inflamed | FAM20C    | protein_cc chr7  | 192969   | 300711   | + | 4629 | 2496.504 | 0        | -1.00974 | 0.18148  | -5.56395 | 2.25E-07 | 1.57E-05 | 0.005919 |
| ENSG0000 response | Inflamed | ZNF575    | protein_cc chr19 | 44029649 | 44040282 | + | 3222 | 401.0597 | 0        | 0.92025  | 0.165531 | 5.559381 | 2.30E-07 | 1.60E-05 | 0.006039 |
| ENSG0000 response | Inflamed | PKM       | protein_cc chr15 | 72491370 | 72524164 | - | 8572 | 35795.57 | 0        | -0.50661 | 0.091157 | -5.55753 | 2.32E-07 | 1.60E-05 | 0.006088 |
| ENSG0000 response | Inflamed | LY96      | protein_cc chr8  | 74903587 | 74941322 | + | 607  | 156.7828 | 0        | -1.19882 | 0.215727 | -5.55711 | 2.32E-07 | 1.60E-05 | 0.006099 |
| ENSG0000 response | Inflamed | DYSF      | protein_cc chr2  | 71680852 | 71913898 | + | 8386 | 1916.869 | 0        | -1.35205 | 0.243311 | -5.55688 | 2.32E-07 | 1.60E-05 | 0.006105 |
| ENSG0000 response | Inflamed | RELT      | protein_cc chr11 | 73087309 | 73108519 | + | 6322 | 669.7947 | 0        | -0.92827 | 0.167058 | -5.55655 | 2.33E-07 | 1.60E-05 | 0.006114 |
| ENSG0000 response | Inflamed | SERPINB9  | protein_cc chr6  | 2887500  | 2903514  | - | 4118 | 1617.594 | 0        | -1.11131 | 0.20005  | -5.55515 | 2.34E-07 | 1.61E-05 | 0.006151 |
| ENSG0000 response | Inflamed | PTPRN2    | protein_cc chr7  | 1.57E+08 | 1.58E+08 | - | 5006 | 1785.747 | 0        | 0.839912 | 0.151232 | 5.553792 | 2.35E-07 | 1.61E-05 | 0.006188 |
| ENSG0000 response | Inflamed | TMEM206   | protein_cc chr1  | 2.13E+08 | 2.13E+08 | - | 2914 | 159.3604 | 0        | -0.6149  | 0.11074  | -5.55264 | 2.37E-07 | 1.61E-05 | 0.006219 |
| ENSG0000 response | Inflamed | RP11-275F | antisense chr1   | 51795326 | 51800996 | + | 1222 | 54.94511 | 0.009547 | 0.976874 | 0.17593  | 5.552626 | 2.37E-07 | 1.61E-05 | 0.006219 |
| ENSG0000 response | Inflamed | CAPN13    | protein_cc chr2  | 30945637 | 31043408 | - | 5203 | 624.2768 | 0.004773 | 1.9107   | 0.344112 | 5.552561 | 2.37E-07 | 1.61E-05 | 0.006221 |
| ENSG0000 response | Inflamed | BMP6      | protein_cc chr6  | 7727030  | 7881655  | + | 2780 | 460.2816 | 0        | -1.21763 | 0.219349 | -5.5511  | 2.38E-07 | 1.62E-05 | 0.006261 |
| ENSG0000 response | Inflamed | BTK       | protein_cc chrX  | 1.01E+08 | 1.01E+08 | - | 4227 | 732.1408 | 0        | -1.0293  | 0.185645 | -5.54443 | 2.45E-07 | 1.66E-05 | 0.006446 |
| ENSG0000 response | Inflamed | WISP1     | protein_cc chr8  | 1.34E+08 | 1.34E+08 | + | 3844 | 516.3652 | 0.00716  | -1.90179 | 0.343048 | -5.54379 | 2.46E-07 | 1.66E-05 | 0.006464 |
| ENSG0000 response | Inflamed | BIN2      | protein_cc chr12 | 51674822 | 51718452 | - | 3976 | 1171.069 | 0        | -0.79353 | 0.143153 | -5.54326 | 2.46E-07 | 1.66E-05 | 0.006479 |
| ENSG0000 response | Inflamed | MMP25     | protein_cc chr16 | 3096682  | 3110727  | + | 4126 | 1374.465 | 0        | -1.25612 | 0.226624 | -5.54275 | 2.47E-07 | 1.66E-05 | 0.006493 |
| ENSG0000 response | Inflamed | CCDC147   | protein_cc chr10 | 1.06E+08 | 1.06E+08 | + | 3548 | 5.28401  | 0.24105  | -0.93736 | 0.169124 | -5.54247 | 2.47E-07 | 1.66E-05 | 0.006501 |
| ENSG0000 response | Inflamed | CCL3      | protein_cc chr17 | 34415602 | 34417515 | - | 1494 | 408.074  | 0        | -1.70588 | 0.307906 | -5.54025 | 2.50E-07 | 1.67E-05 | 0.006564 |

|                   |          |           |                  |          |          |   |       |          |          |          |          |          |          |          |          |
|-------------------|----------|-----------|------------------|----------|----------|---|-------|----------|----------|----------|----------|----------|----------|----------|----------|
| ENSG0000 response | Inflamed | NRCAM     | protein_cc chr7  | 1.08E+08 | 1.08E+08 | - | 7939  | 173.8282 | 0.016706 | -1.90995 | 0.34483  | -5.53882 | 2.51E-07 | 1.68E-05 | 0.006605 |
| ENSG0000 response | Inflamed | HM13      | protein_cc chr20 | 30102231 | 30157370 | + | 5701  | 6862.408 | 0        | -0.45787 | 0.082727 | -5.53473 | 2.56E-07 | 1.70E-05 | 0.006724 |
| ENSG0000 response | Inflamed | NEDD4L    | protein_cc chr18 | 55711599 | 56068772 | + | 15717 | 4518.776 | 0        | 0.955345 | 0.172623 | 5.534292 | 2.56E-07 | 1.70E-05 | 0.006737 |
| ENSG0000 response | Inflamed | GYPC      | protein_cc chr2  | 1.27E+08 | 1.27E+08 | + | 3237  | 786.1933 | 0        | -0.95051 | 0.171787 | -5.53306 | 2.58E-07 | 1.71E-05 | 0.006773 |
| ENSG0000 response | Inflamed | CDHR1     | protein_cc chr10 | 85954410 | 85979377 | + | 6189  | 3671.399 | 0        | 2.303865 | 0.416528 | 5.531112 | 2.60E-07 | 1.72E-05 | 0.006831 |
| ENSG0000 response | Inflamed | C6orf136  | protein_cc chr6  | 30614816 | 30620987 | + | 2118  | 1612.057 | 0        | 0.581898 | 0.105221 | 5.530245 | 2.61E-07 | 1.72E-05 | 0.006856 |
| ENSG0000 response | Inflamed | TNFRSF10C | protein_cc chr8  | 22941868 | 22974950 | + | 2625  | 448.0119 | 0        | -1.78772 | 0.323313 | -5.52937 | 2.62E-07 | 1.72E-05 | 0.006882 |
| ENSG0000 response | Inflamed | GPR132    | protein_cc chr14 | 1.06E+08 | 1.06E+08 | - | 4198  | 448.9905 | 0        | -1.04608 | 0.189191 | -5.52924 | 2.62E-07 | 1.72E-05 | 0.006887 |
| ENSG0000 response | Inflamed | GNAI2     | protein_cc chr3  | 50263724 | 50296787 | + | 7650  | 9413.78  | 0        | -0.73319 | 0.132614 | -5.52877 | 2.62E-07 | 1.72E-05 | 0.0069   |
| ENSG0000 response | Inflamed | BGN       | protein_cc chrX  | 1.53E+08 | 1.53E+08 | + | 2453  | 4698.866 | 0        | -1.4759  | 0.267071 | -5.52623 | 2.65E-07 | 1.73E-05 | 0.006977 |
| ENSG0000 response | Inflamed | MNX1      | protein_cc chr7  | 1.57E+08 | 1.57E+08 | - | 4202  | 359.5585 | 0.004773 | 1.137932 | 0.205996 | 5.524062 | 2.68E-07 | 1.74E-05 | 0.007043 |
| ENSG0000 response | Inflamed | PLCG2     | protein_cc chr16 | 81772702 | 81991899 | + | 9017  | 2322.298 | 0        | -1.04003 | 0.188328 | -5.52246 | 2.70E-07 | 1.75E-05 | 0.007093 |
| ENSG0000 response | Inflamed | HAPLN3    | protein_cc chr15 | 89420519 | 89438857 | - | 3524  | 905.6348 | 0        | -1.42312 | 0.257719 | -5.52199 | 2.70E-07 | 1.75E-05 | 0.007107 |
| ENSG0000 response | Inflamed | AQP7      | protein_cc chr9  | 33384765 | 33402643 | - | 2091  | 200.6396 | 0.00716  | 1.620889 | 0.293691 | 5.519019 | 2.74E-07 | 1.77E-05 | 0.0072   |
| ENSG0000 response | Inflamed | FSCN1     | protein_cc chr7  | 5632439  | 5646286  | + | 3707  | 2245.971 | 0        | -1.04192 | 0.188843 | -5.51737 | 2.76E-07 | 1.77E-05 | 0.007251 |
| ENSG0000 response | Inflamed | THY1      | protein_cc chr11 | 1.19E+08 | 1.19E+08 | - | 5923  | 3910.936 | 0        | -1.25014 | 0.226593 | -5.51712 | 2.76E-07 | 1.77E-05 | 0.007259 |
| ENSG0000 response | Inflamed | FERMT3    | protein_cc chr11 | 63974150 | 63991354 | + | 3062  | 2478.16  | 0        | -0.77817 | 0.141105 | -5.51485 | 2.79E-07 | 1.78E-05 | 0.007331 |
| ENSG0000 response | Inflamed | PKLR      | protein_cc chr1  | 1.55E+08 | 1.55E+08 | - | 2618  | 32.84726 | 0.157518 | 1.316287 | 0.238684 | 5.51477  | 2.79E-07 | 1.78E-05 | 0.007334 |
| ENSG0000 response | Inflamed | SNN       | protein_cc chr16 | 11762270 | 11773015 | + | 3312  | 995.8496 | 0        | -0.74798 | 0.135646 | -5.51418 | 2.80E-07 | 1.78E-05 | 0.007353 |
| ENSG0000 response | Inflamed | CTD-2616J | protein_cc chr19 | 51891543 | 51893828 | - | 1447  | 3.868735 | 0.260143 | -0.69166 | 0.125502 | -5.51119 | 2.83E-07 | 1.80E-05 | 0.007449 |
| ENSG0000 response | Inflamed | SNX20     | protein_cc chr16 | 50700211 | 50715264 | - | 5754  | 769.7208 | 0        | -1.02208 | 0.185463 | -5.51096 | 2.84E-07 | 1.80E-05 | 0.007456 |
| ENSG0000 response | Inflamed | PRAF2     | protein_cc chrX  | 48928813 | 48931730 | - | 1738  | 457.8329 | 0        | -0.6911  | 0.125435 | -5.50965 | 2.85E-07 | 1.81E-05 | 0.007499 |
| ENSG0000 response | Inflamed | GRM2      | protein_cc chr3  | 51741086 | 51752629 | + | 7096  | 15.98807 | 0.100239 | -1.23263 | 0.223793 | -5.50789 | 2.87E-07 | 1.82E-05 | 0.007557 |
| ENSG0000 response | Inflamed | ANGPTL2   | protein_cc chr9  | 1.3E+08  | 1.3E+08  | - | 3889  | 3314.317 | 0        | -1.30083 | 0.236208 | -5.50716 | 2.88E-07 | 1.82E-05 | 0.007581 |
| ENSG0000 response | Inflamed | IGKV1-27  | IG_V_gene chr2   | 89512908 | 89513413 | - | 382   | 3866.976 | 0        | -1.59304 | 0.289331 | -5.50594 | 2.90E-07 | 1.82E-05 | 0.007621 |
| ENSG0000 response | Inflamed | APOBEC3F  | protein_cc chr22 | 39436609 | 39449915 | + | 3242  | 225.4033 | 0        | -0.68968 | 0.125283 | -5.50495 | 2.91E-07 | 1.83E-05 | 0.007654 |
| ENSG0000 response | Inflamed | STARD10   | protein_cc chr11 | 72465774 | 72504726 | - | 3710  | 6853.243 | 0        | 0.851405 | 0.154689 | 5.503979 | 2.92E-07 | 1.83E-05 | 0.007686 |
| ENSG0000 response | Inflamed | CORO1A    | protein_cc chr16 | 30194148 | 30200397 | + | 4871  | 5579.179 | 0        | -0.94131 | 0.171058 | -5.50287 | 2.94E-07 | 1.83E-05 | 0.007723 |
| ENSG0000 response | Inflamed | RP5-1071H | antisense chr1   | 21619783 | 21626267 | + | 2479  | 28.8043  | 0.016706 | -1.05289 | 0.191423 | -5.50032 | 2.97E-07 | 1.85E-05 | 0.007809 |
| ENSG0000 response | Inflamed | IGHV4-34  | IG_V_gene chr14  | 1.07E+08 | 1.07E+08 | - | 400   | 10580.37 | 0        | -1.90766 | 0.346844 | -5.50006 | 2.97E-07 | 1.85E-05 | 0.007818 |
| ENSG0000 response | Inflamed | BHLHE40-1 | antisense chr3   | 4938493  | 5021646  | - | 2718  | 43.80191 | 0.004773 | -0.72283 | 0.131474 | -5.49792 | 3.00E-07 | 1.86E-05 | 0.007891 |
| ENSG0000 response | Inflamed | NFAM1     | protein_cc chr22 | 42776416 | 42828401 | - | 5817  | 1393.563 | 0        | -1.08459 | 0.197321 | -5.4966  | 3.02E-07 | 1.87E-05 | 0.007936 |
| ENSG0000 response | Inflamed | TP73      | protein_cc chr1  | 3569084  | 3652765  | + | 6763  | 140.6921 | 0.002387 | -1.20133 | 0.21865  | -5.49433 | 3.05E-07 | 1.88E-05 | 0.008015 |
| ENSG0000 response | Inflamed | FBXO10    | protein_cc chr9  | 37510889 | 37588871 | - | 6059  | 227.0907 | 0        | -0.65229 | 0.118734 | -5.49365 | 3.06E-07 | 1.88E-05 | 0.008038 |
| ENSG0000 response | Inflamed | AC073842  | antisense chr7   | 99728587 | 99738062 | + | 342   | 7.792363 | 0.119332 | 0.813422 | 0.148103 | 5.492263 | 3.08E-07 | 1.89E-05 | 0.008087 |
| ENSG0000 response | Inflamed | APOBEC3C  | protein_cc chr22 | 39436924 | 39483748 | + | 5496  | 619.2243 | 0        | -0.86826 | 0.158122 | -5.49109 | 3.09E-07 | 1.89E-05 | 0.008128 |
| ENSG0000 response | Inflamed | TNF       | protein_cc chr6  | 31543344 | 31546113 | + | 1676  | 253.4057 | 0        | -1.02418 | 0.186533 | -5.49058 | 3.10E-07 | 1.89E-05 | 0.008146 |
| ENSG0000 response | Inflamed | RASSF5    | protein_cc chr1  | 2.07E+08 | 2.07E+08 | + | 6174  | 2484.807 | 0        | -0.91164 | 0.166116 | -5.48798 | 3.13E-07 | 1.91E-05 | 0.008239 |
| ENSG0000 response | Inflamed | RP11-279F | lincRNA chr15    | 69755365 | 69863775 | + | 2815  | 61.31742 | 0.026253 | 1.386443 | 0.252673 | 5.487105 | 3.15E-07 | 1.91E-05 | 0.00827  |
| ENSG0000 response | Inflamed | ARID5A    | protein_cc chr2  | 97202480 | 97218375 | + | 3565  | 1579.573 | 0        | -0.82258 | 0.15003  | -5.48276 | 3.21E-07 | 1.95E-05 | 0.008427 |

|                   |          |            |                  |          |          |   |      |          |          |          |          |          |          |          |          |
|-------------------|----------|------------|------------------|----------|----------|---|------|----------|----------|----------|----------|----------|----------|----------|----------|
| ENSG0000 response | Inflamed | STRA6      | protein_cc chr15 | 74471807 | 74504608 | - | 7690 | 180.4368 | 0.045346 | -1.94964 | 0.355709 | -5.48099 | 3.23E-07 | 1.96E-05 | 0.008492 |
| ENSG0000 response | Inflamed | CTSH       | protein_cc chr15 | 79213400 | 79241916 | - | 5892 | 3696.647 | 0        | -0.69889 | 0.127521 | -5.48061 | 3.24E-07 | 1.96E-05 | 0.008506 |
| ENSG0000 response | Inflamed | PLEK       | protein_cc chr2  | 68592305 | 68624585 | + | 3314 | 3139.597 | 0        | -1.4551  | 0.265663 | -5.47725 | 3.28E-07 | 1.98E-05 | 0.008631 |
| ENSG0000 response | Inflamed | MMP9       | protein_cc chr20 | 44637547 | 44645200 | + | 2336 | 5161.659 | 0        | -1.64594 | 0.300563 | -5.47621 | 3.30E-07 | 1.98E-05 | 0.00867  |
| ENSG0000 response | Inflamed | CTB-41I6.2 | lincRNA chr17    | 8870840  | 8880312  | + | 557  | 13.42243 | 0.031026 | -0.8451  | 0.154417 | -5.47286 | 3.35E-07 | 2.01E-05 | 0.008797 |
| ENSG0000 response | Inflamed | CYP24A1    | protein_cc chr20 | 52769988 | 52790512 | - | 3972 | 77.91647 | 0.217184 | -2.13717 | 0.390688 | -5.47027 | 3.38E-07 | 2.03E-05 | 0.008896 |
| ENSG0000 response | Inflamed | KLK10      | protein_cc chr19 | 51515995 | 51523431 | - | 3853 | 1661.446 | 0        | -2.83854 | 0.519024 | -5.469   | 3.40E-07 | 2.03E-05 | 0.008945 |
| ENSG0000 response | Inflamed | RP3-407E4  | pseudoger chr6   | 64104912 | 64107011 | - | 1548 | 1.968974 | 0.673031 | 0.813216 | 0.148721 | 5.468063 | 3.42E-07 | 2.04E-05 | 0.008981 |
| ENSG0000 response | Inflamed | DPEP2      | protein_cc chr16 | 68021297 | 68034489 | - | 3498 | 275.8377 | 0        | -0.81348 | 0.148823 | -5.46608 | 3.45E-07 | 2.05E-05 | 0.009059 |
| ENSG0000 response | Inflamed | SH2D3C     | protein_cc chr9  | 1.31E+08 | 1.31E+08 | - | 4599 | 860.6301 | 0        | -0.98388 | 0.18001  | -5.4657  | 3.45E-07 | 2.05E-05 | 0.009074 |
| ENSG0000 response | Inflamed | TMCC2      | protein_cc chr1  | 2.05E+08 | 2.05E+08 | + | 4922 | 144.3771 | 0        | -0.98706 | 0.180613 | -5.46508 | 3.46E-07 | 2.05E-05 | 0.009098 |
| ENSG0000 response | Inflamed | BHLHA15    | protein_cc chr7  | 97840739 | 97842291 | + | 798  | 422.6301 | 0        | -1.27994 | 0.234331 | -5.46212 | 3.51E-07 | 2.07E-05 | 0.009215 |
| ENSG0000 response | Inflamed | IL10RA     | protein_cc chr11 | 1.18E+08 | 1.18E+08 | + | 6546 | 3317.415 | 0        | -0.79166 | 0.144982 | -5.46042 | 3.53E-07 | 2.08E-05 | 0.009283 |
| ENSG0000 response | Inflamed | MT-CO3     | protein_cc chrM  | 9207     | 9990     | + | 784  | 883817.3 | 0        | 0.747779 | 0.136986 | 5.458794 | 3.56E-07 | 2.09E-05 | 0.009349 |
| ENSG0000 response | Inflamed | TWIST1     | protein_cc chr7  | 19060614 | 19157295 | - | 2033 | 121.4702 | 0.00716  | -1.51822 | 0.278139 | -5.45848 | 3.56E-07 | 2.09E-05 | 0.009361 |
| ENSG0000 response | Inflamed | MT-ND1     | protein_cc chrM  | 3307     | 4262     | + | 956  | 399641.4 | 0        | 0.5708   | 0.10458  | 5.458007 | 3.57E-07 | 2.09E-05 | 0.009381 |
| ENSG0000 response | Inflamed | IGKV3D-11  | IG_V_gene chr2   | 90211643 | 90212253 | + | 442  | 263.3604 | 0.002387 | -1.45153 | 0.265979 | -5.45731 | 3.58E-07 | 2.09E-05 | 0.009409 |
| ENSG0000 response | Inflamed | OLR1       | protein_cc chr12 | 10310902 | 10324737 | - | 3055 | 57.09308 | 0.045346 | -1.66504 | 0.30528  | -5.45412 | 3.63E-07 | 2.11E-05 | 0.00954  |
| ENSG0000 response | Inflamed | FMO3       | protein_cc chr1  | 1.71E+08 | 1.71E+08 | + | 3463 | 39.94749 | 0.026253 | -1.24    | 0.22737  | -5.45366 | 3.64E-07 | 2.11E-05 | 0.009559 |
| ENSG0000 response | Inflamed | AC073316   | lincRNA chr7     | 3236258  | 3237888  | - | 418  | 1.606205 | 0.649165 | -0.75899 | 0.139203 | -5.4524  | 3.66E-07 | 2.12E-05 | 0.009611 |
| ENSG0000 response | Inflamed | PIK3R5     | protein_cc chr17 | 8782233  | 8869029  | - | 7501 | 1174.119 | 0        | -0.89208 | 0.163619 | -5.45219 | 3.66E-07 | 2.12E-05 | 0.00962  |
| ENSG0000 response | Inflamed | ATOH1      | protein_cc chr4  | 94750042 | 94751221 | + | 1180 | 955.716  | 0.009547 | 1.543409 | 0.283316 | 5.447666 | 3.73E-07 | 2.16E-05 | 0.00981  |
| ENSG0000 response | Inflamed | FLI1-AS1   | antisense chr11  | 1.29E+08 | 1.29E+08 | - | 1298 | 36.56563 | 0.002387 | -0.86357 | 0.158623 | -5.44415 | 3.79E-07 | 2.18E-05 | 0.00996  |
| ENSG0000 response | Inflamed | IGKV1D-35  | IG_V_gene chr2   | 89901292 | 89901791 | + | 376  | 967.7566 | 0        | -1.62935 | 0.299323 | -5.44344 | 3.80E-07 | 2.19E-05 | 0.009991 |
| ENSG0000 response | Inflamed | IGKV1-16   | IG_V_gene chr2   | 89399352 | 89399854 | - | 378  | 5157.01  | 0        | -1.54227 | 0.283449 | -5.4411  | 3.84E-07 | 2.20E-05 | 0.010092 |
| ENSG0000 response | Inflamed | TAGAP      | protein_cc chr6  | 1.59E+08 | 1.59E+08 | - | 4089 | 1374.663 | 0        | -1.33114 | 0.244711 | -5.43962 | 3.86E-07 | 2.21E-05 | 0.010157 |
| ENSG0000 response | Inflamed | SRPX2      | protein_cc chrX  | 99899215 | 99926296 | + | 2368 | 310.2411 | 0        | -1.01132 | 0.185931 | -5.43922 | 3.87E-07 | 2.21E-05 | 0.010174 |
| ENSG0000 response | Inflamed | IRG1       | protein_cc chr13 | 77522632 | 77532777 | + | 2177 | 59.27446 | 0.386635 | -2.18178 | 0.401125 | -5.43915 | 3.87E-07 | 2.21E-05 | 0.010177 |
| ENSG0000 response | Inflamed | IGFBP7     | protein_cc chr4  | 57896939 | 57976551 | - | 1932 | 8715.718 | 0        | -1.00326 | 0.184628 | -5.43395 | 3.96E-07 | 2.25E-05 | 0.010408 |
| ENSG0000 response | Inflamed | MT-CO1     | protein_cc chrM  | 5904     | 7445     | + | 1542 | 1910545  | 0        | 0.587392 | 0.108112 | 5.43317  | 3.97E-07 | 2.26E-05 | 0.010444 |
| ENSG0000 response | Inflamed | GFAP       | protein_cc chr17 | 42982376 | 42994305 | - | 6086 | 15.48926 | 0.114558 | -1.2958  | 0.238539 | -5.43223 | 3.99E-07 | 2.26E-05 | 0.010486 |
| ENSG0000 response | Inflamed | TCN1       | protein_cc chr11 | 59620273 | 59634048 | - | 1586 | 377.2959 | 0.112172 | -2.5814  | 0.475215 | -5.43207 | 3.99E-07 | 2.26E-05 | 0.010493 |
| ENSG0000 response | Inflamed | SMOC1      | protein_cc chr14 | 70320848 | 70499083 | + | 4369 | 369.2506 | 0        | -1.49629 | 0.275518 | -5.43083 | 4.01E-07 | 2.26E-05 | 0.01055  |
| ENSG0000 response | Inflamed | TMEM45A    | protein_cc chr3  | 1E+08    | 1E+08    | + | 6005 | 270.7566 | 0        | -0.92236 | 0.169885 | -5.42929 | 4.04E-07 | 2.27E-05 | 0.01062  |
| ENSG0000 response | Inflamed | HES1       | protein_cc chr3  | 1.94E+08 | 1.94E+08 | + | 2062 | 1841.179 | 0        | 0.572878 | 0.105522 | 5.428986 | 4.04E-07 | 2.27E-05 | 0.010634 |
| ENSG0000 response | Inflamed | SELP       | protein_cc chr1  | 1.7E+08  | 1.7E+08  | - | 3490 | 719.6229 | 0.002387 | -1.66868 | 0.307368 | -5.42892 | 4.05E-07 | 2.27E-05 | 0.010637 |
| ENSG0000 response | Inflamed | OLFML2B    | protein_cc chr1  | 1.62E+08 | 1.62E+08 | - | 3415 | 833.6158 | 0        | -1.31015 | 0.241379 | -5.42776 | 4.07E-07 | 2.27E-05 | 0.01069  |
| ENSG0000 response | Inflamed | PLEKHN1    | protein_cc chr1  | 901877   | 911245   | + | 2833 | 139.3986 | 0.00716  | -1.19047 | 0.219428 | -5.42531 | 4.11E-07 | 2.29E-05 | 0.010804 |
| ENSG0000 response | Inflamed | GFPT2      | protein_cc chr5  | 1.8E+08  | 1.8E+08  | - | 4780 | 379.6038 | 0.002387 | -1.48596 | 0.273971 | -5.4238  | 4.14E-07 | 2.30E-05 | 0.010874 |
| ENSG0000 response | Inflamed | NNMT       | protein_cc chr11 | 1.14E+08 | 1.14E+08 | + | 2919 | 1120.871 | 0        | -1.3851  | 0.255436 | -5.42249 | 4.16E-07 | 2.31E-05 | 0.010936 |

|                   |          |           |                  |          |          |   |      |          |          |          |          |          |          |          |          |
|-------------------|----------|-----------|------------------|----------|----------|---|------|----------|----------|----------|----------|----------|----------|----------|----------|
| ENSG0000 response | Inflamed | STX11     | protein_cc chr6  | 1.44E+08 | 1.45E+08 | + | 1926 | 326.599  | 0.002387 | -1.11603 | 0.205826 | -5.42222 | 4.16E-07 | 2.31E-05 | 0.010949 |
| ENSG0000 response | Inflamed | GNLY      | protein_cc chr2  | 85912298 | 85925977 | + | 3051 | 419.4487 | 0        | -1.26016 | 0.232438 | -5.4215  | 4.18E-07 | 2.31E-05 | 0.010983 |
| ENSG0000 response | Inflamed | RAP1GAP   | protein_cc chr1  | 21922708 | 21995801 | - | 5650 | 3014.356 | 0        | 1.218254 | 0.224775 | 5.41989  | 4.21E-07 | 2.32E-05 | 0.011059 |
| ENSG0000 response | Inflamed | RP11-459C | lincRNA chr17    | 3880397  | 3885193  | + | 549  | 9.747017 | 0.088305 | 0.882451 | 0.162845 | 5.418945 | 4.22E-07 | 2.33E-05 | 0.011104 |
| ENSG0000 response | Inflamed | THRB      | protein_cc chr3  | 24158651 | 24536773 | - | 8709 | 458.2816 | 0.002387 | 1.231471 | 0.227281 | 5.418278 | 4.24E-07 | 2.33E-05 | 0.011136 |
| ENSG0000 response | Inflamed | CAMK2N2   | protein_cc chr3  | 1.84E+08 | 1.84E+08 | - | 1362 | 10.98568 | 0.052506 | -1.06056 | 0.195747 | -5.41801 | 4.24E-07 | 2.33E-05 | 0.011149 |
| ENSG0000 response | Inflamed | SYP       | protein_cc chrX  | 49044269 | 49056718 | - | 5203 | 279.2315 | 0        | 0.828436 | 0.152989 | 5.415001 | 4.30E-07 | 2.35E-05 | 0.011295 |
| ENSG0000 response | Inflamed | CTD-2288f | antisense chr16  | 18938185 | 18948365 | + | 463  | 15.75895 | 0.004773 | 0.630054 | 0.116366 | 5.414431 | 4.31E-07 | 2.35E-05 | 0.011323 |
| ENSG0000 response | Inflamed | THPO      | protein_cc chr3  | 1.84E+08 | 1.84E+08 | - | 1915 | 13.23628 | 0.0358   | -0.90781 | 0.167684 | -5.41385 | 4.32E-07 | 2.35E-05 | 0.011351 |
| ENSG0000 response | Inflamed | GRAMD1A   | protein_cc chr19 | 35485688 | 35517375 | + | 5942 | 2407.888 | 0        | -0.83947 | 0.15512  | -5.41174 | 4.36E-07 | 2.37E-05 | 0.011455 |
| ENSG0000 response | Inflamed | AC005152  | processed_chr17  | 70033455 | 70217977 | - | 8450 | 27.60621 | 0.026253 | 1.015673 | 0.187744 | 5.40987  | 4.39E-07 | 2.39E-05 | 0.011547 |
| ENSG0000 response | Inflamed | PEA15     | protein_cc chr1  | 1.6E+08  | 1.6E+08  | + | 2806 | 4515.518 | 0        | -0.65946 | 0.121967 | -5.40685 | 4.45E-07 | 2.41E-05 | 0.011699 |
| ENSG0000 response | Inflamed | MCHR1     | protein_cc chr22 | 41074754 | 41078818 | + | 2961 | 16.53461 | 0.088305 | -1.17149 | 0.216754 | -5.40469 | 4.49E-07 | 2.43E-05 | 0.011808 |
| ENSG0000 response | Inflamed | TGFBI     | protein_cc chr5  | 1.35E+08 | 1.35E+08 | + | 7835 | 12381.6  | 0        | -0.84955 | 0.157193 | -5.40451 | 4.49E-07 | 2.43E-05 | 0.011817 |
| ENSG0000 response | Inflamed | NOD2      | protein_cc chr16 | 50727514 | 50766988 | + | 5747 | 341.4081 | 0        | -1.12777 | 0.208708 | -5.40357 | 4.51E-07 | 2.43E-05 | 0.011865 |
| ENSG0000 response | Inflamed | AANAT     | protein_cc chr17 | 74449433 | 74466199 | + | 2190 | 2.198091 | 0.470167 | -0.73685 | 0.136373 | -5.40321 | 4.52E-07 | 2.43E-05 | 0.011883 |
| ENSG0000 response | Inflamed | C1R       | protein_cc chr12 | 7187513  | 7245203  | - | 4696 | 7865.148 | 0        | -1.0403  | 0.192558 | -5.40251 | 4.53E-07 | 2.43E-05 | 0.011919 |
| ENSG0000 response | Inflamed | LAX1      | protein_cc chr1  | 2.04E+08 | 2.04E+08 | + | 3198 | 962.6539 | 0        | -1.50343 | 0.278309 | -5.40201 | 4.54E-07 | 2.43E-05 | 0.011945 |
| ENSG0000 response | Inflamed | IRF4      | protein_cc chr6  | 391739   | 411447   | + | 5898 | 3783.876 | 0        | -1.34932 | 0.249789 | -5.40182 | 4.55E-07 | 2.43E-05 | 0.011954 |
| ENSG0000 response | Inflamed | MEOX1     | protein_cc chr17 | 41717756 | 41739322 | - | 2707 | 455.7255 | 0        | -1.22839 | 0.227473 | -5.40016 | 4.58E-07 | 2.44E-05 | 0.01204  |
| ENSG0000 response | Inflamed | KLK15     | protein_cc chr19 | 51328545 | 51340469 | - | 2289 | 221.9857 | 0.011933 | 1.949922 | 0.361134 | 5.399439 | 4.59E-07 | 2.44E-05 | 0.012078 |
| ENSG0000 response | Inflamed | IGKV3-20  | IG_V_gene chr2   | 89442057 | 89442643 | - | 400  | 57836.42 | 0        | -1.6104  | 0.298513 | -5.39474 | 4.69E-07 | 2.49E-05 | 0.012324 |
| ENSG0000 response | Inflamed | AC007879  | lincRNA chr2     | 2.08E+08 | 2.08E+08 | + | 1204 | 1.460621 | 0.651551 | -0.70959 | 0.131558 | -5.39377 | 4.71E-07 | 2.50E-05 | 0.012376 |
| ENSG0000 response | Inflamed | PGAP3     | protein_cc chr17 | 37827375 | 37853050 | - | 3669 | 2334.819 | 0        | 0.63528  | 0.117798 | 5.392951 | 4.72E-07 | 2.50E-05 | 0.01242  |
| ENSG0000 response | Inflamed | MB        | protein_cc chr22 | 36002811 | 36033998 | - | 3020 | 257.7112 | 0.00716  | 1.583123 | 0.29366  | 5.39101  | 4.76E-07 | 2.51E-05 | 0.012524 |
| ENSG0000 response | Inflamed | RP11-536k | antisense chr10  | 5976233  | 5987863  | - | 3912 | 39.68974 | 0        | -0.90025 | 0.167024 | -5.38993 | 4.79E-07 | 2.52E-05 | 0.012582 |
| ENSG0000 response | Inflamed | AVEN      | protein_cc chr15 | 34158428 | 34331377 | - | 1808 | 417.6444 | 0        | -0.35863 | 0.06655  | -5.38884 | 4.81E-07 | 2.52E-05 | 0.012641 |
| ENSG0000 response | Inflamed | CCDC3     | protein_cc chr10 | 12938627 | 13141652 | - | 3681 | 826.0286 | 0        | -1.37709 | 0.255577 | -5.38815 | 4.82E-07 | 2.52E-05 | 0.012679 |
| ENSG0000 response | Inflamed | KLHDC7B   | protein_cc chr22 | 50986462 | 50989451 | + | 2990 | 124.8854 | 0.002387 | -1.0913  | 0.202536 | -5.38815 | 4.82E-07 | 2.52E-05 | 0.012679 |
| ENSG0000 response | Inflamed | RP11-169l | antisense chr11  | 72295616 | 72299023 | + | 664  | 10.27924 | 0.076372 | -0.85883 | 0.1594   | -5.38787 | 4.83E-07 | 2.52E-05 | 0.012694 |
| ENSG0000 response | Inflamed | FFAR2     | protein_cc chr19 | 35934809 | 35942669 | + | 2149 | 712.7422 | 0        | -1.86498 | 0.346155 | -5.38769 | 4.83E-07 | 2.52E-05 | 0.012704 |
| ENSG0000 response | Inflamed | MT3       | protein_cc chr16 | 56622986 | 56625000 | + | 1837 | 9.128878 | 0.281623 | 0.96952  | 0.180064 | 5.384297 | 4.90E-07 | 2.55E-05 | 0.01289  |
| ENSG0000 response | Inflamed | OCSTAMP   | protein_cc chr20 | 45169585 | 45179213 | - | 2043 | 2.422434 | 0.536993 | -0.81011 | 0.150475 | -5.38368 | 4.92E-07 | 2.55E-05 | 0.012925 |
| ENSG0000 response | Inflamed | MNDA      | protein_cc chr1  | 1.59E+08 | 1.59E+08 | + | 2059 | 520.1002 | 0        | -1.59526 | 0.296438 | -5.38144 | 4.96E-07 | 2.57E-05 | 0.01305  |
| ENSG0000 response | Inflamed | MMP1      | protein_cc chr11 | 1.03E+08 | 1.03E+08 | - | 1970 | 4548.446 | 0        | -2.24888 | 0.417942 | -5.38085 | 4.98E-07 | 2.58E-05 | 0.013082 |
| ENSG0000 response | Inflamed | LST1      | protein_cc chr6  | 31553901 | 31556686 | + | 2281 | 549.3031 | 0        | -0.99473 | 0.184901 | -5.37977 | 5.00E-07 | 2.58E-05 | 0.013143 |
| ENSG0000 response | Inflamed | MT-ND4    | protein_cc chrM  | 10760    | 12137    | + | 1378 | 936839   | 0        | 0.575326 | 0.107013 | 5.376203 | 5.08E-07 | 2.62E-05 | 0.013346 |
| ENSG0000 response | Inflamed | RP11-317J | antisense chr8   | 86354080 | 86377144 | - | 1257 | 43.29833 | 0.00716  | 0.899973 | 0.167537 | 5.371775 | 5.17E-07 | 2.66E-05 | 0.013603 |
| ENSG0000 response | Inflamed | NTNG2     | protein_cc chr9  | 1.35E+08 | 1.35E+08 | + | 5415 | 101.5036 | 0.00716  | -1.19699 | 0.22292  | -5.36959 | 5.22E-07 | 2.68E-05 | 0.013731 |
| ENSG0000 response | Inflamed | DCSTAMP   | protein_cc chr8  | 1.05E+08 | 1.05E+08 | + | 2778 | 13.08592 | 0.224344 | -1.21978 | 0.227258 | -5.36738 | 5.27E-07 | 2.70E-05 | 0.013862 |

|                   |          |           |                  |          |          |   |      |          |          |          |          |          |          |          |          |
|-------------------|----------|-----------|------------------|----------|----------|---|------|----------|----------|----------|----------|----------|----------|----------|----------|
| ENSG0000 response | Inflamed | CD180     | protein_cc chr5  | 66478103 | 66492627 | - | 3006 | 506.611  | 0        | -1.17648 | 0.219254 | -5.36585 | 5.31E-07 | 2.71E-05 | 0.013953 |
| ENSG0000 response | Inflamed | CCL4      | protein_cc chr17 | 34430983 | 34433014 | + | 2032 | 449.0811 | 0        | -1.36266 | 0.254124 | -5.36219 | 5.39E-07 | 2.75E-05 | 0.014174 |
| ENSG0000 response | Inflamed | KLK4      | protein_cc chr19 | 51409608 | 51413994 | - | 1935 | 21.04535 | 0.164678 | 1.370567 | 0.255667 | 5.360753 | 5.42E-07 | 2.76E-05 | 0.014261 |
| ENSG0000 response | Inflamed | IGHV1-69  | IG_V_gene chr14  | 1.07E+08 | 1.07E+08 | - | 412  | 11575.36 | 0        | -1.64663 | 0.307201 | -5.36011 | 5.44E-07 | 2.77E-05 | 0.014301 |
| ENSG0000 response | Inflamed | LMCD1     | protein_cc chr3  | 8543393  | 8609805  | + | 2578 | 513.1599 | 0        | -1.03705 | 0.193549 | -5.35805 | 5.49E-07 | 2.78E-05 | 0.014427 |
| ENSG0000 response | Inflamed | ARHGAP30  | protein_cc chr1  | 1.61E+08 | 1.61E+08 | - | 5064 | 3224.618 | 0        | -0.92437 | 0.172523 | -5.35796 | 5.49E-07 | 2.78E-05 | 0.014433 |
| ENSG0000 response | Inflamed | 03-Sep    | protein_cc chr22 | 42372276 | 42394225 | + | 5427 | 63.66587 | 0.00716  | -0.95437 | 0.178164 | -5.35671 | 5.52E-07 | 2.79E-05 | 0.01451  |
| ENSG0000 response | Inflamed | HLA-DOB   | protein_cc chr6  | 32780540 | 32784825 | - | 1858 | 252.2601 | 0        | -1.20464 | 0.224886 | -5.35667 | 5.52E-07 | 2.79E-05 | 0.014513 |
| ENSG0000 response | Inflamed | PGLYRP1   | protein_cc chr19 | 46522411 | 46526323 | - | 720  | 27.10024 | 0.131265 | -1.61176 | 0.300945 | -5.35567 | 5.54E-07 | 2.79E-05 | 0.014575 |
| ENSG0000 response | Inflamed | VOPP1     | protein_cc chr7  | 55503749 | 55640681 | - | 5361 | 3265.1   | 0        | -0.32706 | 0.061135 | -5.34975 | 5.69E-07 | 2.86E-05 | 0.01495  |
| ENSG0000 response | Inflamed | ELOVL3    | protein_cc chr10 | 1.04E+08 | 1.04E+08 | + | 1371 | 7.99284  | 0.138425 | -0.99922 | 0.186791 | -5.34941 | 5.69E-07 | 2.86E-05 | 0.014972 |
| ENSG0000 response | Inflamed | SLAMF8    | protein_cc chr1  | 1.6E+08  | 1.6E+08  | + | 2996 | 1442.093 | 0        | -0.80488 | 0.150478 | -5.34883 | 5.71E-07 | 2.86E-05 | 0.015009 |
| ENSG0000 response | Inflamed | FTSJ1     | protein_cc chrX  | 48334541 | 48344752 | + | 2740 | 1114.723 | 0        | -0.36161 | 0.067625 | -5.34726 | 5.75E-07 | 2.87E-05 | 0.01511  |
| ENSG0000 response | Inflamed | UBE2E2    | protein_cc chr3  | 23244511 | 23633284 | + | 3272 | 265.0477 | 0        | -0.72886 | 0.13638  | -5.34436 | 5.82E-07 | 2.90E-05 | 0.015299 |
| ENSG0000 response | Inflamed | TM4SF19   | protein_cc chr3  | 1.96E+08 | 1.96E+08 | - | 1896 | 5.472554 | 0.412888 | -1.14276 | 0.213828 | -5.34429 | 5.82E-07 | 2.90E-05 | 0.015304 |
| ENSG0000 response | Inflamed | ITPRIPL1  | protein_cc chr2  | 96991069 | 96994091 | + | 2495 | 102.3938 | 0        | -0.82855 | 0.15515  | -5.34029 | 5.92E-07 | 2.94E-05 | 0.015568 |
| ENSG0000 response | Inflamed | HEY2      | protein_cc chr6  | 1.26E+08 | 1.26E+08 | + | 2741 | 56.81146 | 0.004773 | -0.94163 | 0.17633  | -5.34014 | 5.93E-07 | 2.94E-05 | 0.015578 |
| ENSG0000 response | Inflamed | DEF6      | protein_cc chr6  | 35265595 | 35289548 | + | 2675 | 1388.272 | 0        | -0.61895 | 0.115912 | -5.33983 | 5.93E-07 | 2.94E-05 | 0.015599 |
| ENSG0000 response | Inflamed | IGKV3-15  | IG_V_gene chr2   | 89384673 | 89385283 | - | 442  | 10091.73 | 0        | -1.70174 | 0.318764 | -5.33858 | 5.97E-07 | 2.95E-05 | 0.015683 |
| ENSG0000 response | Inflamed | BFSP2     | protein_cc chr3  | 1.33E+08 | 1.33E+08 | + | 2070 | 18.94988 | 0.059666 | -1.22232 | 0.228987 | -5.33794 | 5.98E-07 | 2.95E-05 | 0.015726 |
| ENSG0000 response | Inflamed | PADI2     | protein_cc chr1  | 17393256 | 17445948 | - | 6002 | 14448.26 | 0        | 1.507338 | 0.282409 | 5.337421 | 5.99E-07 | 2.95E-05 | 0.01576  |
| ENSG0000 response | Inflamed | NT5DC2    | protein_cc chr3  | 52558386 | 52569070 | - | 4734 | 1943.831 | 0        | -0.69592 | 0.130415 | -5.33621 | 6.03E-07 | 2.96E-05 | 0.015842 |
| ENSG0000 response | Inflamed | BEST4     | protein_cc chr1  | 45249257 | 45253377 | - | 2047 | 1951.439 | 0        | 2.193307 | 0.411042 | 5.335962 | 6.03E-07 | 2.96E-05 | 0.015859 |
| ENSG0000 response | Inflamed | LINC00877 | lincRNA chr3     | 72084451 | 72291716 | - | 4520 | 51.50835 | 0.002387 | -1.13597 | 0.212913 | -5.33539 | 6.05E-07 | 2.96E-05 | 0.015898 |
| ENSG0000 response | Inflamed | TGFB1     | protein_cc chr19 | 41807492 | 41859816 | - | 3238 | 3113.365 | 0        | -0.87661 | 0.164329 | -5.33449 | 6.07E-07 | 2.96E-05 | 0.015959 |
| ENSG0000 response | Inflamed | LDLRAD3   | protein_cc chr11 | 35965531 | 36253686 | + | 4575 | 389.2625 | 0        | -1.07787 | 0.202057 | -5.33448 | 6.07E-07 | 2.96E-05 | 0.01596  |
| ENSG0000 response | Inflamed | RGL4      | protein_cc chr22 | 24030323 | 24041363 | + | 4715 | 63.72792 | 0        | -1.11882 | 0.209789 | -5.33307 | 6.11E-07 | 2.97E-05 | 0.016056 |
| ENSG0000 response | Inflamed | CXCL6     | protein_cc chr4  | 74702214 | 74714781 | + | 2183 | 1010.165 | 0.004773 | -2.60841 | 0.489384 | -5.32999 | 6.19E-07 | 3.01E-05 | 0.016269 |
| ENSG0000 response | Inflamed | MT-ND2    | protein_cc chrM  | 4470     | 5511     | + | 1042 | 402854.8 | 0        | 0.594214 | 0.111569 | 5.325973 | 6.30E-07 | 3.05E-05 | 0.016551 |
| ENSG0000 response | Inflamed | C5AR1     | protein_cc chr19 | 47793280 | 47825323 | + | 2951 | 991.5012 | 0        | -1.33908 | 0.251597 | -5.32229 | 6.40E-07 | 3.10E-05 | 0.016814 |
| ENSG0000 response | Inflamed | SERPING1  | protein_cc chr11 | 57364860 | 57382326 | + | 3603 | 6577.623 | 0        | -1.00194 | 0.188271 | -5.32178 | 6.41E-07 | 3.10E-05 | 0.01685  |
| ENSG0000 response | Inflamed | OTOP2     | protein_cc chr17 | 72920370 | 72930007 | + | 2778 | 1512.286 | 0.02148  | 2.727025 | 0.512478 | 5.321252 | 6.42E-07 | 3.10E-05 | 0.016889 |
| ENSG0000 response | Inflamed | RP11-1008 | lincRNA chr15    | 38276967 | 38354541 | + | 2448 | 6.995227 | 0.412888 | -1.29645 | 0.243664 | -5.32067 | 6.44E-07 | 3.10E-05 | 0.016931 |
| ENSG0000 response | Inflamed | MT-ND4L   | protein_cc chrM  | 10470    | 10766    | + | 297  | 141014.5 | 0        | 0.55558  | 0.10447  | 5.318094 | 6.51E-07 | 3.13E-05 | 0.017118 |
| ENSG0000 response | Inflamed | FAP       | protein_cc chr2  | 1.63E+08 | 1.63E+08 | - | 7003 | 181.5656 | 0.01432  | -1.88708 | 0.35491  | -5.31706 | 6.54E-07 | 3.14E-05 | 0.017193 |
| ENSG0000 response | Inflamed | SELL      | protein_cc chr1  | 1.7E+08  | 1.7E+08  | - | 2725 | 1306.914 | 0        | -1.82822 | 0.344017 | -5.31433 | 6.62E-07 | 3.17E-05 | 0.017396 |
| ENSG0000 response | Inflamed | LINC00880 | lincRNA chr3     | 1.57E+08 | 1.57E+08 | - | 2018 | 11.64439 | 0.042959 | -0.77571 | 0.145996 | -5.31326 | 6.65E-07 | 3.18E-05 | 0.017475 |
| ENSG0000 response | Inflamed | SPIRE2    | protein_cc chr16 | 89884587 | 89937727 | + | 7975 | 2301.699 | 0        | 0.846846 | 0.159394 | 5.312899 | 6.66E-07 | 3.18E-05 | 0.017502 |
| ENSG0000 response | Inflamed | ANGPT2    | protein_cc chr8  | 6357172  | 6420930  | - | 6784 | 134.327  | 0.00716  | -1.35323 | 0.254749 | -5.31199 | 6.68E-07 | 3.18E-05 | 0.01757  |
| ENSG0000 response | Inflamed | CLEC4E    | protein_cc chr12 | 8685901  | 8693559  | - | 2422 | 141.1981 | 0.026253 | -1.8176  | 0.342326 | -5.30956 | 6.75E-07 | 3.21E-05 | 0.017753 |

|                   |          |                    |            |          |          |          |     |          |          |          |          |          |          |          |          |          |
|-------------------|----------|--------------------|------------|----------|----------|----------|-----|----------|----------|----------|----------|----------|----------|----------|----------|----------|
| ENSG0000 response | Inflamed | IGKV1D-27IG_V_pseu | chr2       | 90007677 | 90008154 | +        | 354 | 261.7733 | 0.002387 | -1.53415 | 0.289079 | -5.30703 | 6.83E-07 | 3.24E-05 | 0.017946 |          |
| ENSG0000 response | Inflamed | NCF1B              | pseudoger  | chr7     | 72634611 | 72649979 | +   | 1950     | 283.7041 | 0        | -0.95983 | 0.180867 | -5.3068  | 6.83E-07 | 3.24E-05 | 0.017964 |
| ENSG0000 response | Inflamed | U82695.1C          | lincRNA    | chrX     | 1.53E+08 | 1.53E+08 | +   | 2725     | 57.50597 | 0.009547 | -0.91648 | 0.172774 | -5.30448 | 6.90E-07 | 3.26E-05 | 0.018142 |
| ENSG0000 response | Inflamed | UCN2               | protein_cc | chr3     | 48599160 | 48601206 | -   | 1481     | 63.98807 | 0.140811 | -2.12263 | 0.400317 | -5.30237 | 6.96E-07 | 3.29E-05 | 0.018306 |
| ENSG0000 response | Inflamed | RP11-338C          | lincRNA    | chr1     | 2.13E+08 | 2.13E+08 | -   | 473      | 3.350835 | 0.27685  | -0.6993  | 0.131951 | -5.29972 | 7.04E-07 | 3.31E-05 | 0.018515 |
| ENSG0000 response | Inflamed | IGSF9              | protein_cc | chr1     | 1.6E+08  | 1.6E+08  | -   | 6620     | 2412.463 | 0        | 1.465167 | 0.276463 | 5.299687 | 7.04E-07 | 3.31E-05 | 0.018517 |
| ENSG0000 response | Inflamed | FAAH               | protein_cc | chr1     | 46859937 | 46879520 | +   | 2776     | 1533.542 | 0        | 0.772723 | 0.145864 | 5.297568 | 7.11E-07 | 3.34E-05 | 0.018685 |
| ENSG0000 response | Inflamed | PLEKHO2            | protein_cc | chr15    | 65134088 | 65160206 | +   | 3720     | 2532.547 | 0        | -0.87561 | 0.165311 | -5.29676 | 7.13E-07 | 3.34E-05 | 0.018749 |
| ENSG0000 response | Inflamed | IMPA2              | protein_cc | chr18    | 11981024 | 12030876 | +   | 3819     | 2241.069 | 0        | 0.528085 | 0.099722 | 5.29559  | 7.17E-07 | 3.35E-05 | 0.018843 |
| ENSG0000 response | Inflamed | DEF8               | protein_cc | chr16    | 90014333 | 90034468 | +   | 6565     | 2065.862 | 0        | -0.5018  | 0.094787 | -5.29393 | 7.22E-07 | 3.37E-05 | 0.018977 |
| ENSG0000 response | Inflamed | KTI12              | protein_cc | chr1     | 52497775 | 52499488 | -   | 1714     | 313.4582 | 0        | -0.2992  | 0.056551 | -5.29082 | 7.31E-07 | 3.41E-05 | 0.01923  |
| ENSG0000 response | Inflamed | MAGEH1             | protein_cc | chrX     | 55478538 | 55479998 | +   | 1461     | 347.2172 | 0        | -0.75221 | 0.142177 | -5.29061 | 7.32E-07 | 3.41E-05 | 0.019247 |
| ENSG0000 response | Inflamed | TMEM171            | protein_cc | chr5     | 72416119 | 72427644 | +   | 1535     | 1590.508 | 0        | 1.161781 | 0.219673 | 5.288694 | 7.38E-07 | 3.43E-05 | 0.019405 |
| ENSG0000 response | Inflamed | SERPINI1           | protein_cc | chr3     | 1.67E+08 | 1.68E+08 | +   | 2418     | 103.3747 | 0.004773 | -1.09683 | 0.20745  | -5.28718 | 7.43E-07 | 3.44E-05 | 0.019531 |
| ENSG0000 response | Inflamed | A4GALT             | protein_cc | chr22    | 43088127 | 43117304 | -   | 2943     | 662.8687 | 0        | -1.0292  | 0.194733 | -5.2852  | 7.49E-07 | 3.47E-05 | 0.019696 |
| ENSG0000 response | Inflamed | LIMD2              | protein_cc | chr17    | 61773262 | 61778532 | -   | 4745     | 1731.406 | 0        | -1.01475 | 0.192013 | -5.28482 | 7.50E-07 | 3.47E-05 | 0.019728 |
| ENSG0000 response | Inflamed | SLC22A23           | protein_cc | chr6     | 3269196  | 3457256  | -   | 8898     | 5764.945 | 0        | 0.849629 | 0.160814 | 5.28331  | 7.55E-07 | 3.48E-05 | 0.019855 |
| ENSG0000 response | Inflamed | AKR1D1             | protein_cc | chr7     | 1.38E+08 | 1.38E+08 | +   | 3093     | 4.300716 | 0.329356 | -0.82008 | 0.155224 | -5.28319 | 7.56E-07 | 3.48E-05 | 0.019865 |
| ENSG0000 response | Inflamed | CD72               | protein_cc | chr9     | 35609530 | 35646807 | -   | 3374     | 322.3031 | 0        | -1.11902 | 0.211854 | -5.28201 | 7.59E-07 | 3.49E-05 | 0.019965 |
| ENSG0000 response | Inflamed | KLK3               | protein_cc | chr19    | 51358171 | 51364020 | +   | 4639     | 105.1957 | 0.02864  | 1.585276 | 0.300145 | 5.281706 | 7.60E-07 | 3.49E-05 | 0.019991 |
| ENSG0000 response | Inflamed | LRRC26             | protein_cc | chr9     | 1.4E+08  | 1.4E+08  | -   | 1209     | 999.4439 | 0.00716  | 1.454222 | 0.275532 | 5.277865 | 7.73E-07 | 3.53E-05 | 0.020321 |
| ENSG0000 response | Inflamed | MT-ATP6            | protein_cc | chrM     | 8527     | 9207     | +   | 681      | 553274.8 | 0        | 0.550134 | 0.104234 | 5.277863 | 7.73E-07 | 3.53E-05 | 0.020321 |
| ENSG0000 response | Inflamed | CPA6               | protein_cc | chr8     | 68334360 | 68658620 | -   | 2435     | 44.17422 | 0.0358   | 1.434268 | 0.271753 | 5.277828 | 7.73E-07 | 3.53E-05 | 0.020324 |
| ENSG0000 response | Inflamed | KAZALD1            | protein_cc | chr10    | 1.03E+08 | 1.03E+08 | +   | 3613     | 479.3914 | 0        | 0.629141 | 0.119304 | 5.273452 | 7.88E-07 | 3.59E-05 | 0.020706 |
| ENSG0000 response | Inflamed | RP5-1057J          | lincRNA    | chr1     | 23704873 | 23705522 | -   | 650      | 25.24105 | 0.026253 | 0.964667 | 0.183059 | 5.269717 | 8.00E-07 | 3.64E-05 | 0.021037 |
| ENSG0000 response | Inflamed | DUSP14             | protein_cc | chr17    | 35849937 | 35873603 | +   | 2499     | 180.315  | 0        | -0.93835 | 0.178071 | -5.26949 | 8.01E-07 | 3.64E-05 | 0.021057 |
| ENSG0000 response | Inflamed | SH3TC1             | protein_cc | chr4     | 8183799  | 8243530  | +   | 10593    | 1155.635 | 0        | -0.82402 | 0.15642  | -5.26802 | 8.06E-07 | 3.65E-05 | 0.02119  |
| ENSG0000 response | Inflamed | IGLV1-47           | IG_V_gene  | chr22    | 22712087 | 22712608 | +   | 407      | 7747.325 | 0        | -1.69697 | 0.322191 | -5.26697 | 8.10E-07 | 3.66E-05 | 0.021285 |
| ENSG0000 response | Inflamed | AKR1B1             | protein_cc | chr7     | 1.34E+08 | 1.34E+08 | -   | 3660     | 1581.53  | 0        | -0.85381 | 0.162144 | -5.26574 | 8.14E-07 | 3.68E-05 | 0.021396 |
| ENSG0000 response | Inflamed | LAIR1              | protein_cc | chr19    | 54865362 | 54882165 | -   | 5700     | 1409.15  | 0        | -0.70591 | 0.134107 | -5.2638  | 8.21E-07 | 3.70E-05 | 0.021573 |
| ENSG0000 response | Inflamed | C22orf34           | protein_cc | chr22    | 49808176 | 50051190 | -   | 6755     | 77.7327  | 0.002387 | -0.85397 | 0.162284 | -5.26217 | 8.26E-07 | 3.72E-05 | 0.021723 |
| ENSG0000 response | Inflamed | IL11               | protein_cc | chr19    | 55875757 | 55881831 | -   | 2671     | 880.7542 | 0.002387 | -2.58571 | 0.491468 | -5.2612  | 8.30E-07 | 3.73E-05 | 0.021812 |
| ENSG0000 response | Inflamed | LY6G5C             | protein_cc | chr6     | 31644461 | 31651817 | -   | 2621     | 80.45585 | 0        | -0.44615 | 0.084856 | -5.2578  | 8.42E-07 | 3.78E-05 | 0.02213  |
| ENSG0000 response | Inflamed | ADAM12             | protein_cc | chr10    | 1.28E+08 | 1.28E+08 | -   | 9860     | 461.148  | 0.00716  | -1.79874 | 0.34217  | -5.25685 | 8.45E-07 | 3.79E-05 | 0.02222  |
| ENSG0000 response | Inflamed | SERPINE1           | protein_cc | chr7     | 1.01E+08 | 1.01E+08 | +   | 3190     | 1984.537 | 0.002387 | -2.09872 | 0.399357 | -5.25526 | 8.51E-07 | 3.80E-05 | 0.02237  |
| ENSG0000 response | Inflamed | CD40               | protein_cc | chr20    | 44746911 | 44758502 | +   | 2368     | 881.8759 | 0        | -0.8541  | 0.16255  | -5.25435 | 8.54E-07 | 3.80E-05 | 0.022457 |
| ENSG0000 response | Inflamed | KCNN3              | protein_cc | chr1     | 1.55E+08 | 1.55E+08 | -   | 13553    | 697.2053 | 0        | -1.10689 | 0.210661 | -5.25434 | 8.54E-07 | 3.80E-05 | 0.022458 |
| ENSG0000 response | Inflamed | ANO7               | protein_cc | chr2     | 2.42E+08 | 2.42E+08 | +   | 5695     | 1426.687 | 0        | 1.239462 | 0.235913 | 5.253893 | 8.56E-07 | 3.80E-05 | 0.0225   |
| ENSG0000 response | Inflamed | RP11-701F          | lincRNA    | chr4     | 1.86E+08 | 1.86E+08 | -   | 986      | 22.83771 | 0.393795 | -1.80926 | 0.344367 | -5.25386 | 8.56E-07 | 3.80E-05 | 0.022503 |
| ENSG0000 response | Inflamed | ISM1               | protein_cc | chr20    | 13202418 | 13281298 | +   | 2593     | 15.57518 | 0.107399 | -1.44293 | 0.274658 | -5.25355 | 8.57E-07 | 3.80E-05 | 0.022533 |



|                   |          |           |                  |          |          |   |       |          |          |          |          |          |          |          |          |
|-------------------|----------|-----------|------------------|----------|----------|---|-------|----------|----------|----------|----------|----------|----------|----------|----------|
| ENSG0000 response | Inflamed | RHEBL1    | protein_cc chr12 | 49458468 | 49463808 | - | 1290  | 28.09547 | 0.002387 | -0.7371  | 0.140325 | -5.2528  | 8.60E-07 | 3.80E-05 | 0.022605 |
| ENSG0000 response | Inflamed | ST3GAL2   | protein_cc chr16 | 70413338 | 70473140 | - | 6287  | 1567.964 | 0        | -0.81978 | 0.156072 | -5.25258 | 8.61E-07 | 3.80E-05 | 0.022626 |
| ENSG0000 response | Inflamed | RETN      | protein_cc chr19 | 7733930  | 7735334  | + | 514   | 5.023866 | 0.439141 | -1.13087 | 0.215362 | -5.251   | 8.66E-07 | 3.82E-05 | 0.022778 |
| ENSG0000 response | Inflamed | EGFL6     | protein_cc chrX  | 13587724 | 13651694 | + | 2607  | 141.9523 | 0.047733 | -2.21585 | 0.422213 | -5.24818 | 8.77E-07 | 3.86E-05 | 0.023052 |
| ENSG0000 response | Inflamed | DNASE2    | protein_cc chr19 | 12986025 | 12992282 | - | 2389  | 1516.069 | 0        | -0.40748 | 0.077684 | -5.24536 | 8.87E-07 | 3.90E-05 | 0.02333  |
| ENSG0000 response | Inflamed | RP3-406A7 | lincRNA chr6     | 1.37E+08 | 1.37E+08 | - | 374   | 35.61575 | 0        | 0.985082 | 0.187835 | 5.244414 | 8.91E-07 | 3.91E-05 | 0.023424 |
| ENSG0000 response | Inflamed | CSGALNAC  | protein_cc chr8  | 19261672 | 19615540 | - | 6580  | 369.1623 | 0        | -1.39288 | 0.265646 | -5.24337 | 8.95E-07 | 3.92E-05 | 0.023528 |
| ENSG0000 response | Inflamed | ZBP1      | protein_cc chr20 | 56178902 | 56195632 | - | 5413  | 1313.508 | 0        | -1.16826 | 0.222845 | -5.24248 | 8.98E-07 | 3.93E-05 | 0.023617 |
| ENSG0000 response | Inflamed | PLEKHG2   | protein_cc chr19 | 39903225 | 39919054 | + | 9199  | 1810.99  | 0        | -0.88152 | 0.168176 | -5.24164 | 9.02E-07 | 3.94E-05 | 0.023701 |
| ENSG0000 response | Inflamed | PLEKHO1   | protein_cc chr1  | 1.5E+08  | 1.5E+08  | + | 6629  | 2024.031 | 0        | -0.78135 | 0.149097 | -5.24053 | 9.06E-07 | 3.95E-05 | 0.023813 |
| ENSG0000 response | Inflamed | ZNF385D   | protein_cc chr3  | 21459915 | 22414812 | - | 7420  | 56.36277 | 0.004773 | -1.23039 | 0.234791 | -5.24036 | 9.06E-07 | 3.95E-05 | 0.02383  |
| ENSG0000 response | Inflamed | NUGGC     | protein_cc chr8  | 27879481 | 27941388 | - | 3978  | 329.9117 | 0        | -1.28517 | 0.245407 | -5.23691 | 9.20E-07 | 4.00E-05 | 0.024181 |
| ENSG0000 response | Inflamed | SLC2A3    | protein_cc chr12 | 8071826  | 8088871  | - | 6159  | 1661.814 | 0        | -1.40932 | 0.269248 | -5.23429 | 9.30E-07 | 4.03E-05 | 0.024451 |
| ENSG0000 response | Inflamed | PRRX2     | protein_cc chr9  | 1.32E+08 | 1.32E+08 | + | 1233  | 97.34845 | 0.002387 | -1.17896 | 0.225341 | -5.23188 | 9.40E-07 | 4.07E-05 | 0.024702 |
| ENSG0000 response | Inflamed | PHOSPHO   | protein_cc chr17 | 47300724 | 47308128 | - | 2375  | 73.46062 | 0.02864  | -1.80162 | 0.344425 | -5.23079 | 9.44E-07 | 4.08E-05 | 0.024816 |
| ENSG0000 response | Inflamed | SLAMF7    | protein_cc chr1  | 1.61E+08 | 1.61E+08 | + | 4604  | 3738.169 | 0        | -1.04783 | 0.200335 | -5.2304  | 9.46E-07 | 4.08E-05 | 0.024858 |
| ENSG0000 response | Inflamed | SERPINF1  | protein_cc chr17 | 1665253  | 1680868  | + | 3069  | 2896.527 | 0        | -0.87247 | 0.166851 | -5.22901 | 9.51E-07 | 4.09E-05 | 0.025004 |
| ENSG0000 response | Inflamed | CALCRL    | protein_cc chr2  | 1.88E+08 | 1.88E+08 | - | 6144  | 352.4177 | 0.002387 | -1.1338  | 0.216833 | -5.2289  | 9.52E-07 | 4.09E-05 | 0.025016 |
| ENSG0000 response | Inflamed | TREML3P   | pseudoger chr6   | 41176292 | 41190382 | - | 1230  | 7.735084 | 0.443914 | -1.27532 | 0.243907 | -5.2287  | 9.52E-07 | 4.09E-05 | 0.025037 |
| ENSG0000 response | Inflamed | IGLV1-44  | IG_V_gene chr22  | 22735135 | 22735715 | + | 466   | 15484.54 | 0        | -1.63258 | 0.312337 | -5.22697 | 9.59E-07 | 4.11E-05 | 0.025222 |
| ENSG0000 response | Inflamed | ATAD3C    | protein_cc chr1  | 1385069  | 1405538  | + | 3976  | 65.36754 | 0.002387 | -0.85342 | 0.163344 | -5.22469 | 9.69E-07 | 4.15E-05 | 0.025465 |
| ENSG0000 response | Inflamed | CNTFR     | protein_cc chr9  | 34551430 | 34590121 | - | 2094  | 325.2816 | 0.023866 | 1.877709 | 0.359502 | 5.223081 | 9.75E-07 | 4.17E-05 | 0.02564  |
| ENSG0000 response | Inflamed | ACSF2     | protein_cc chr17 | 48503519 | 48552206 | + | 5797  | 1814.752 | 0        | 0.8515   | 0.163045 | 5.222494 | 9.78E-07 | 4.17E-05 | 0.025704 |
| ENSG0000 response | Inflamed | MEDAG     | protein_cc chr13 | 31480328 | 31499709 | + | 2374  | 188.2864 | 0.026253 | -1.88581 | 0.361247 | -5.22027 | 9.87E-07 | 4.21E-05 | 0.025947 |
| ENSG0000 response | Inflamed | FADS3     | protein_cc chr11 | 61640991 | 61659523 | - | 6283  | 601.0597 | 0        | -0.78055 | 0.149538 | -5.21978 | 9.89E-07 | 4.21E-05 | 0.026001 |
| ENSG0000 response | Inflamed | KLK6      | protein_cc chr19 | 51461887 | 51472929 | - | 1976  | 292.3007 | 0.331742 | -2.97479 | 0.570022 | -5.21873 | 9.93E-07 | 4.22E-05 | 0.026117 |
| ENSG0000 response | Inflamed | ECEL1     | protein_cc chr2  | 2.33E+08 | 2.33E+08 | - | 2972  | 15.15274 | 0.176611 | -1.49619 | 0.286778 | -5.21723 | 1.00E-06 | 4.24E-05 | 0.026283 |
| ENSG0000 response | Inflamed | ENTPD1    | protein_cc chr10 | 97471536 | 97637023 | + | 14587 | 1631.439 | 0        | -0.93278 | 0.178797 | -5.21694 | 1.00E-06 | 4.24E-05 | 0.026315 |
| ENSG0000 response | Inflamed | DBNDD2    | protein_cc chr20 | 44034697 | 44039250 | + | 2764  | 336.1575 | 0        | 0.574173 | 0.11009  | 5.215468 | 1.01E-06 | 4.25E-05 | 0.026479 |
| ENSG0000 response | Inflamed | SLC9B2    | protein_cc chr4  | 1.04E+08 | 1.04E+08 | - | 5469  | 207.6253 | 0        | -1.02691 | 0.196899 | -5.21544 | 1.01E-06 | 4.25E-05 | 0.026483 |
| ENSG0000 response | Inflamed | IGHV3-30  | IG_V_gene chr14  | 1.07E+08 | 1.07E+08 | - | 431   | 9577.516 | 0        | -1.66772 | 0.319789 | -5.21508 | 1.01E-06 | 4.25E-05 | 0.026523 |
| ENSG0000 response | Inflamed | RP11-81H7 | lincRNA chr12    | 68726668 | 68845443 | - | 2695  | 85.72554 | 0.002387 | -1.03867 | 0.199173 | -5.21494 | 1.01E-06 | 4.25E-05 | 0.026539 |
| ENSG0000 response | Inflamed | FXVD5     | protein_cc chr19 | 35645633 | 35660786 | + | 2993  | 2040.513 | 0        | -0.81614 | 0.156579 | -5.21236 | 1.02E-06 | 4.29E-05 | 0.02683  |
| ENSG0000 response | Inflamed | IL13RA2   | protein_cc chrX  | 1.14E+08 | 1.14E+08 | - | 1626  | 164.5179 | 0.019093 | -2.06106 | 0.395482 | -5.21152 | 1.02E-06 | 4.29E-05 | 0.026925 |
| ENSG0000 response | Inflamed | MUCL1     | protein_cc chr12 | 55224303 | 55252177 | + | 1250  | 6.451074 | 0.610979 | -1.4918  | 0.286311 | -5.21043 | 1.03E-06 | 4.30E-05 | 0.02705  |
| ENSG0000 response | Inflamed | RP4-680D5 | antisense chr1   | 15892106 | 15892451 | - | 346   | 8.486874 | 0.090692 | 0.747984 | 0.143558 | 5.210343 | 1.03E-06 | 4.30E-05 | 0.02706  |
| ENSG0000 response | Inflamed | GNB3      | protein_cc chr12 | 6949118  | 6956557  | + | 3437  | 108.5346 | 0        | -0.85857 | 0.164811 | -5.20942 | 1.03E-06 | 4.30E-05 | 0.027165 |
| ENSG0000 response | Inflamed | GAS1      | protein_cc chr9  | 89559279 | 89562104 | - | 2826  | 472.2124 | 0.011933 | -2.27765 | 0.437232 | -5.20925 | 1.03E-06 | 4.30E-05 | 0.027184 |
| ENSG0000 response | Inflamed | LEPRE1    | protein_cc chr1  | 43212006 | 43232755 | - | 6766  | 1098.365 | 0        | -0.7152  | 0.137298 | -5.2091  | 1.03E-06 | 4.30E-05 | 0.027203 |
| ENSG0000 response | Inflamed | RP11-3877 | lincRNA chr17    | 38168479 | 38170958 | - | 982   | 2.174224 | 0.591885 | -0.78283 | 0.150286 | -5.20894 | 1.04E-06 | 4.30E-05 | 0.027221 |

|                   |          |           |                  |          |          |   |       |          |          |          |          |          |          |          |          |
|-------------------|----------|-----------|------------------|----------|----------|---|-------|----------|----------|----------|----------|----------|----------|----------|----------|
| ENSG0000 response | Inflamed | KCNAB2    | protein_cc chr1  | 6051526  | 6161253  | + | 9253  | 1534.241 | 0        | -0.76492 | 0.146907 | -5.20681 | 1.04E-06 | 4.33E-05 | 0.027467 |
| ENSG0000 response | Inflamed | ZNF467    | protein_cc chr7  | 1.49E+08 | 1.49E+08 | - | 2734  | 437.8329 | 0        | -0.91941 | 0.17674  | -5.20205 | 1.07E-06 | 4.41E-05 | 0.028025 |
| ENSG0000 response | Inflamed | AC007362  | pseudoger chr2   | 2.07E+08 | 2.07E+08 | + | 1886  | 122.7232 | 0.004773 | -1.04605 | 0.201146 | -5.20044 | 1.07E-06 | 4.44E-05 | 0.028216 |
| ENSG0000 response | Inflamed | C1orf226  | protein_cc chr1  | 1.62E+08 | 1.62E+08 | + | 4487  | 1371.635 | 0        | 0.783174 | 0.150639 | 5.199006 | 1.08E-06 | 4.46E-05 | 0.028387 |
| ENSG0000 response | Inflamed | PLAU      | protein_cc chr10 | 75668935 | 75677255 | + | 2950  | 4807.981 | 0        | -1.29809 | 0.249772 | -5.19711 | 1.09E-06 | 4.48E-05 | 0.028615 |
| ENSG0000 response | Inflamed | ULBP2     | protein_cc chr6  | 1.5E+08  | 1.5E+08  | + | 1349  | 10.57518 | 0.116945 | -1.10776 | 0.213161 | -5.19683 | 1.09E-06 | 4.48E-05 | 0.02865  |
| ENSG0000 response | Inflamed | PIK3CD    | protein_cc chr1  | 9711790  | 9789172  | + | 6593  | 1925.179 | 0        | -0.99945 | 0.192333 | -5.19647 | 1.09E-06 | 4.48E-05 | 0.028693 |
| ENSG0000 response | Inflamed | MT-TV     | Mt_tRNA chrM     | 1602     | 1670     | + | 69    | 246      | 0.002387 | 1.357942 | 0.261374 | 5.195405 | 1.10E-06 | 4.50E-05 | 0.028822 |
| ENSG0000 response | Inflamed | HES2      | protein_cc chr1  | 6472478  | 6484730  | - | 5407  | 1066.761 | 0        | 1.047331 | 0.20165  | 5.193812 | 1.10E-06 | 4.52E-05 | 0.029017 |
| ENSG0000 response | Inflamed | CD83      | protein_cc chr6  | 14117872 | 14137149 | + | 2471  | 612.5322 | 0        | -1.03252 | 0.198904 | -5.19103 | 1.12E-06 | 4.56E-05 | 0.029359 |
| ENSG0000 response | Inflamed | CA7       | protein_cc chr16 | 66878282 | 66888056 | + | 1862  | 2271.05  | 0.00716  | 2.410827 | 0.464423 | 5.191018 | 1.12E-06 | 4.56E-05 | 0.029361 |
| ENSG0000 response | Inflamed | A1BG-AS1  | antisense chr19  | 58859117 | 58866549 | + | 2793  | 162.5585 | 0        | -0.65229 | 0.125682 | -5.18999 | 1.12E-06 | 4.57E-05 | 0.029489 |
| ENSG0000 response | Inflamed | RP11-598F | antisense chr12  | 273830   | 275487   | - | 1101  | 17.56325 | 0.200477 | -1.39621 | 0.269031 | -5.18979 | 1.12E-06 | 4.57E-05 | 0.029514 |
| ENSG0000 response | Inflamed | C1orf216  | protein_cc chr1  | 36179476 | 36185073 | - | 3629  | 411.2768 | 0.002387 | -0.7229  | 0.139301 | -5.18945 | 1.12E-06 | 4.57E-05 | 0.029556 |
| ENSG0000 response | Inflamed | RP11-4712 | lincRNA chr14    | 62023031 | 62037371 | - | 5148  | 22.73747 | 0.112172 | -1.35078 | 0.260337 | -5.18858 | 1.13E-06 | 4.57E-05 | 0.029664 |
| ENSG0000 response | Inflamed | ITGAM     | protein_cc chr16 | 31271311 | 31344213 | + | 5665  | 1034.296 | 0        | -1.0921  | 0.210501 | -5.1881  | 1.13E-06 | 4.57E-05 | 0.029724 |
| ENSG0000 response | Inflamed | CD93      | protein_cc chr20 | 23059986 | 23066977 | - | 6708  | 4800.926 | 0        | -1.04245 | 0.200936 | -5.18795 | 1.13E-06 | 4.57E-05 | 0.029743 |
| ENSG0000 response | Inflamed | AC017002  | lincRNA chr2     | 1.12E+08 | 1.12E+08 | + | 757   | 9.98568  | 0.088305 | -0.97198 | 0.187353 | -5.18792 | 1.13E-06 | 4.57E-05 | 0.029747 |
| ENSG0000 response | Inflamed | GNA15     | protein_cc chr19 | 3136191  | 3163767  | + | 2613  | 803.0692 | 0        | -0.90828 | 0.175089 | -5.18754 | 1.13E-06 | 4.57E-05 | 0.029795 |
| ENSG0000 response | Inflamed | MAK       | protein_cc chr6  | 10762956 | 10838764 | - | 4378  | 7.840095 | 0.348449 | -1.30147 | 0.250989 | -5.18538 | 1.14E-06 | 4.60E-05 | 0.030067 |
| ENSG0000 response | Inflamed | IGKV4-1   | IG_V_gene chr2   | 89184913 | 89185669 | + | 538   | 24495.63 | 0        | -1.55827 | 0.30061  | -5.18369 | 1.15E-06 | 4.62E-05 | 0.030283 |
| ENSG0000 response | Inflamed | NCF1C     | pseudoger chr7   | 74572445 | 74587848 | - | 1892  | 271.4606 | 0        | -0.99491 | 0.191932 | -5.18365 | 1.15E-06 | 4.62E-05 | 0.030288 |
| ENSG0000 response | Inflamed | ARID3A    | protein_cc chr19 | 925781   | 975939   | + | 7504  | 1040.315 | 0        | -0.77871 | 0.150252 | -5.18268 | 1.16E-06 | 4.64E-05 | 0.030412 |
| ENSG0000 response | Inflamed | G6PD      | protein_cc chrX  | 1.54E+08 | 1.54E+08 | - | 3709  | 1935.864 | 0        | -0.48316 | 0.09328  | -5.17972 | 1.17E-06 | 4.69E-05 | 0.030794 |
| ENSG0000 response | Inflamed | TMEM72    | protein_cc chr10 | 45406648 | 45432450 | + | 3157  | 479.7208 | 0.02864  | 2.176313 | 0.42024  | 5.178734 | 1.18E-06 | 4.70E-05 | 0.030922 |
| ENSG0000 response | Inflamed | RP1-191J1 | antisense chr6   | 1.08E+08 | 1.08E+08 | + | 2574  | 15.63246 | 0.02864  | -0.75477 | 0.145764 | -5.17801 | 1.18E-06 | 4.70E-05 | 0.031017 |
| ENSG0000 response | Inflamed | NFE4      | antisense chr7   | 1.03E+08 | 1.03E+08 | + | 1072  | 7.823389 | 0.374702 | -1.28276 | 0.247743 | -5.1778  | 1.18E-06 | 4.70E-05 | 0.031044 |
| ENSG0000 response | Inflamed | ARHGAP25  | protein_cc chr2  | 68906733 | 69053965 | + | 5509  | 1038.382 | 0        | -0.908   | 0.175376 | -5.17743 | 1.18E-06 | 4.70E-05 | 0.031092 |
| ENSG0000 response | Inflamed | ISL2      | protein_cc chr15 | 76629065 | 76634817 | + | 2221  | 73.78043 | 0.002387 | -0.92714 | 0.179164 | -5.17482 | 1.20E-06 | 4.75E-05 | 0.031436 |
| ENSG0000 response | Inflamed | MYBPH     | protein_cc chr1  | 2.03E+08 | 2.03E+08 | - | 1805  | 13.54893 | 0.217184 | -1.31209 | 0.253585 | -5.17418 | 1.20E-06 | 4.75E-05 | 0.031521 |
| ENSG0000 response | Inflamed | EVI2A     | protein_cc chr17 | 29644578 | 29648902 | - | 2071  | 216.2482 | 0        | -0.84874 | 0.164047 | -5.17374 | 1.20E-06 | 4.76E-05 | 0.031579 |
| ENSG0000 response | Inflamed | IGLV1-40  | IG_V_gene chr22  | 22764098 | 22764614 | + | 407   | 19093.81 | 0        | -1.56942 | 0.303493 | -5.1712  | 1.21E-06 | 4.80E-05 | 0.03192  |
| ENSG0000 response | Inflamed | DERL3     | protein_cc chr22 | 24176690 | 24181315 | - | 3796  | 5759.993 | 0        | -1.25534 | 0.243042 | -5.16512 | 1.25E-06 | 4.92E-05 | 0.032746 |
| ENSG0000 response | Inflamed | GGT5      | protein_cc chr22 | 24615622 | 24641110 | - | 2590  | 1512.523 | 0        | -1.01512 | 0.196555 | -5.16455 | 1.25E-06 | 4.92E-05 | 0.032825 |
| ENSG0000 response | Inflamed | CTD-2547  | antisense chr11  | 76666461 | 76689663 | - | 568   | 45.72792 | 0.011933 | 1.042582 | 0.201961 | 5.162292 | 1.26E-06 | 4.96E-05 | 0.033139 |
| ENSG0000 response | Inflamed | SLC39A5   | protein_cc chr12 | 56623833 | 56631630 | + | 2903  | 4023.012 | 0        | 1.366483 | 0.264729 | 5.161817 | 1.26E-06 | 4.96E-05 | 0.033205 |
| ENSG0000 response | Inflamed | NLRP7     | protein_cc chr19 | 55434877 | 55477680 | - | 3914  | 52.89976 | 0.004773 | -1.2715  | 0.246416 | -5.15998 | 1.27E-06 | 4.99E-05 | 0.033462 |
| ENSG0000 response | Inflamed | CBX2      | protein_cc chr17 | 77751931 | 77761782 | + | 5687  | 156.8401 | 0        | -0.94424 | 0.182999 | -5.15981 | 1.27E-06 | 4.99E-05 | 0.033487 |
| ENSG0000 response | Inflamed | SLC16A10  | protein_cc chr6  | 1.11E+08 | 1.12E+08 | + | 11159 | 164.7351 | 0.002387 | -1.19039 | 0.230717 | -5.15952 | 1.28E-06 | 4.99E-05 | 0.033528 |
| ENSG0000 response | Inflamed | IGKV2D-28 | IG_V_gene chr2   | 89998789 | 89999564 | + | 402   | 450.6014 | 0.002387 | -1.48056 | 0.286995 | -5.15881 | 1.28E-06 | 5.00E-05 | 0.033628 |

|                   |          |           |                  |          |          |   |       |          |          |          |          |          |          |          |          |
|-------------------|----------|-----------|------------------|----------|----------|---|-------|----------|----------|----------|----------|----------|----------|----------|----------|
| ENSG0000 response | Inflamed | TCEA3     | protein_cc chr1  | 23707554 | 23751233 | - | 3515  | 3325.205 | 0        | 0.954489 | 0.185045 | 5.158152 | 1.28E-06 | 5.00E-05 | 0.033721 |
| ENSG0000 response | Inflamed | KIFC3     | protein_cc chr16 | 57792129 | 57896957 | - | 7552  | 987.568  | 0        | -0.9865  | 0.19127  | -5.15765 | 1.29E-06 | 5.01E-05 | 0.033793 |
| ENSG0000 response | Inflamed | CTSK      | protein_cc chr1  | 1.51E+08 | 1.51E+08 | - | 1887  | 2342.391 | 0        | -1.02738 | 0.199353 | -5.15358 | 1.31E-06 | 5.09E-05 | 0.034376 |
| ENSG0000 response | Inflamed | PRCP      | protein_cc chr11 | 82534544 | 82681626 | - | 6482  | 2453.675 | 0        | -0.69871 | 0.135599 | -5.15276 | 1.31E-06 | 5.10E-05 | 0.034495 |
| ENSG0000 response | Inflamed | CES2      | protein_cc chr16 | 66968347 | 66978999 | + | 5343  | 21055.9  | 0        | 0.92255  | 0.179131 | 5.150146 | 1.33E-06 | 5.14E-05 | 0.034875 |
| ENSG0000 response | Inflamed | TEX14     | protein_cc chr17 | 56634039 | 56769416 | - | 5325  | 12.05489 | 0.112172 | -1.06401 | 0.2071   | -5.13767 | 1.40E-06 | 5.41E-05 | 0.036752 |
| ENSG0000 response | Inflamed | LINC00526 | lincRNA chr18    | 5236723  | 5238597  | - | 1875  | 183.3986 | 0        | 0.602685 | 0.117471 | 5.130516 | 1.44E-06 | 5.57E-05 | 0.037872 |
| ENSG0000 response | Inflamed | CLPTM1L   | protein_cc chr5  | 1317859  | 1345214  | - | 6557  | 6656.172 | 0        | -0.38105 | 0.074316 | -5.12739 | 1.46E-06 | 5.63E-05 | 0.038372 |
| ENSG0000 response | Inflamed | GPR176    | protein_cc chr15 | 40091233 | 40213093 | - | 5119  | 577.0119 | 0        | -1.30856 | 0.255269 | -5.12622 | 1.47E-06 | 5.65E-05 | 0.038561 |
| ENSG0000 response | Inflamed | RP5-1091T | antisense chrX   | 70403409 | 70418025 | - | 726   | 25.12411 | 0.011933 | -0.77923 | 0.152022 | -5.12573 | 1.47E-06 | 5.66E-05 | 0.03864  |
| ENSG0000 response | Inflamed | AC009133  | lincRNA chr16    | 29793246 | 29794294 | + | 1049  | 1568.621 | 0.011933 | 2.377665 | 0.464078 | 5.123414 | 1.48E-06 | 5.70E-05 | 0.039016 |
| ENSG0000 response | Inflamed | PRR16     | protein_cc chr5  | 1.2E+08  | 1.2E+08  | + | 2281  | 268.568  | 0        | -0.99353 | 0.193955 | -5.1225  | 1.49E-06 | 5.71E-05 | 0.039166 |
| ENSG0000 response | Inflamed | IGLC6     | IG_C_pseu chr22  | 23261707 | 23262023 | + | 317   | 240.6635 | 0.004773 | -1.29725 | 0.253256 | -5.12229 | 1.49E-06 | 5.71E-05 | 0.0392   |
| ENSG0000 response | Inflamed | LA16c-380 | lincRNA chr16    | 3056121  | 3057386  | + | 1266  | 173.2721 | 0        | 0.763821 | 0.14912  | 5.122204 | 1.49E-06 | 5.71E-05 | 0.039215 |
| ENSG0000 response | Inflamed | GALNT18   | protein_cc chr11 | 11292423 | 11643552 | - | 3627  | 374.8926 | 0        | -0.73763 | 0.144024 | -5.12156 | 1.50E-06 | 5.72E-05 | 0.039322 |
| ENSG0000 response | Inflamed | ELOVL5    | protein_cc chr6  | 53132196 | 53213947 | - | 4223  | 1310.482 | 0        | -0.90096 | 0.175931 | -5.12111 | 1.50E-06 | 5.72E-05 | 0.039394 |
| ENSG0000 response | Inflamed | TRIM55    | protein_cc chr8  | 67039131 | 67087720 | + | 3079  | 9.477327 | 0.133652 | -1.18297 | 0.231068 | -5.11959 | 1.51E-06 | 5.75E-05 | 0.039647 |
| ENSG0000 response | Inflamed | IGKV2-28  | IG_V_gene chr2   | 89521179 | 89521942 | - | 390   | 844.1313 | 0.002387 | -1.55762 | 0.304341 | -5.11801 | 1.52E-06 | 5.76E-05 | 0.03991  |
| ENSG0000 response | Inflamed | GZMB      | protein_cc chr14 | 25100160 | 25103473 | - | 1408  | 226.1504 | 0        | -1.32158 | 0.258223 | -5.118   | 1.52E-06 | 5.76E-05 | 0.039911 |
| ENSG0000 response | Inflamed | IGLV2-5   | IG_V_pseu chr22  | 23198937 | 23199213 | + | 277   | 66.26253 | 0.009547 | -1.31785 | 0.257496 | -5.11795 | 1.52E-06 | 5.76E-05 | 0.039919 |
| ENSG0000 response | Inflamed | ABCC8     | protein_cc chr11 | 17414432 | 17498449 | - | 6835  | 59.01193 | 0.02148  | 1.163563 | 0.227391 | 5.117016 | 1.52E-06 | 5.77E-05 | 0.040077 |
| ENSG0000 response | Inflamed | NTRK1     | protein_cc chr1  | 1.57E+08 | 1.57E+08 | + | 4356  | 42.69212 | 0.01432  | -0.92342 | 0.180517 | -5.1154  | 1.53E-06 | 5.80E-05 | 0.040348 |
| ENSG0000 response | Inflamed | CFB       | protein_cc chr6  | 31895475 | 31919861 | + | 6622  | 1577.456 | 0        | -1.08474 | 0.212066 | -5.11512 | 1.54E-06 | 5.80E-05 | 0.040395 |
| ENSG0000 response | Inflamed | PRKG2     | protein_cc chr4  | 82009837 | 82136218 | - | 3751  | 94.65394 | 0.031026 | 1.269777 | 0.248296 | 5.113959 | 1.54E-06 | 5.82E-05 | 0.040593 |
| ENSG0000 response | Inflamed | CD86      | protein_cc chr3  | 1.22E+08 | 1.22E+08 | + | 3430  | 438.6563 | 0        | -0.82708 | 0.16174  | -5.11362 | 1.55E-06 | 5.82E-05 | 0.04065  |
| ENSG0000 response | Inflamed | IGHV3-49  | IG_V_gene chr14  | 1.07E+08 | 1.07E+08 | - | 437   | 4533.079 | 0        | -1.53747 | 0.300688 | -5.11316 | 1.55E-06 | 5.83E-05 | 0.04073  |
| ENSG0000 response | Inflamed | SLCO3A1   | protein_cc chr15 | 92396925 | 92715665 | + | 9435  | 1024.683 | 0        | -0.72535 | 0.141882 | -5.11233 | 1.55E-06 | 5.84E-05 | 0.04087  |
| ENSG0000 response | Inflamed | SLC22A5   | protein_cc chr5  | 1.32E+08 | 1.32E+08 | + | 12788 | 2252.761 | 0        | 0.868207 | 0.169834 | 5.112079 | 1.56E-06 | 5.84E-05 | 0.040914 |
| ENSG0000 response | Inflamed | SIX4      | protein_cc chr14 | 61176246 | 61191066 | - | 6658  | 29.58473 | 0.047733 | -1.34058 | 0.262539 | -5.1062  | 1.59E-06 | 5.97E-05 | 0.041932 |
| ENSG0000 response | Inflamed | FOXP3     | protein_cc chrX  | 49106897 | 49121288 | - | 2578  | 275.9093 | 0.002387 | -1.16202 | 0.227625 | -5.10498 | 1.60E-06 | 6.00E-05 | 0.042148 |
| ENSG0000 response | Inflamed | SP140     | protein_cc chr2  | 2.31E+08 | 2.31E+08 | + | 5829  | 447.0788 | 0        | -1.09396 | 0.214369 | -5.10317 | 1.62E-06 | 6.03E-05 | 0.042469 |
| ENSG0000 response | Inflamed | SBSN      | protein_cc chr19 | 36014269 | 36019253 | - | 1986  | 53.75418 | 0.396181 | -2.26478 | 0.443918 | -5.10179 | 1.62E-06 | 6.05E-05 | 0.042714 |
| ENSG0000 response | Inflamed | IGLC3     | IG_C_gene chr22  | 23248512 | 23248973 | + | 462   | 44799.05 | 0        | -1.41841 | 0.278032 | -5.10161 | 1.63E-06 | 6.05E-05 | 0.042746 |
| ENSG0000 response | Inflamed | GUCY1A2   | protein_cc chr11 | 1.07E+08 | 1.07E+08 | - | 16361 | 58.40811 | 0.026253 | -1.1745  | 0.230294 | -5.09998 | 1.64E-06 | 6.08E-05 | 0.043037 |
| ENSG0000 response | Inflamed | MAP1LC3C  | protein_cc chr1  | 2.42E+08 | 2.42E+08 | - | 1182  | 4.73031  | 0.245823 | -0.76316 | 0.149643 | -5.09989 | 1.64E-06 | 6.08E-05 | 0.043054 |
| ENSG0000 response | Inflamed | RP11-586I | lincRNA chr4     | 6202460  | 6240044  | + | 2547  | 7.546539 | 0.236277 | -1.04259 | 0.204472 | -5.09894 | 1.64E-06 | 6.10E-05 | 0.043225 |
| ENSG0000 response | Inflamed | UCP2      | protein_cc chr11 | 73685712 | 73694352 | - | 3237  | 3640.284 | 0        | -0.70644 | 0.13859  | -5.09734 | 1.66E-06 | 6.13E-05 | 0.043517 |
| ENSG0000 response | Inflamed | IGHG2     | IG_C_gene chr14  | 1.06E+08 | 1.06E+08 | - | 1132  | 123207.2 | 0        | -2.11756 | 0.41546  | -5.0969  | 1.66E-06 | 6.13E-05 | 0.043595 |
| ENSG0000 response | Inflamed | CXCL5     | protein_cc chr4  | 74861359 | 74864496 | - | 2538  | 1725.842 | 0.081146 | -3.6268  | 0.71158  | -5.09682 | 1.66E-06 | 6.13E-05 | 0.043611 |
| ENSG0000 response | Inflamed | LAG3      | protein_cc chr12 | 6881678  | 6887621  | + | 3056  | 565.4916 | 0        | -0.94152 | 0.18479  | -5.09509 | 1.67E-06 | 6.16E-05 | 0.043928 |

|                   |          |           |            |       |          |          |   |       |          |          |          |          |          |          |          |          |
|-------------------|----------|-----------|------------|-------|----------|----------|---|-------|----------|----------|----------|----------|----------|----------|----------|----------|
| ENSG0000 response | Inflamed | ITPKB-IT1 | sense_intr | chr1  | 2.27E+08 | 2.27E+08 | - | 870   | 2.136038 | 0.584726 | -0.73833 | 0.144922 | -5.09469 | 1.67E-06 | 6.16E-05 | 0.044    |
| ENSG0000 response | Inflamed | TNFRSF9   | protein_cc | chr1  | 7979907  | 8000926  | - | 2284  | 100.7804 | 0.009547 | -1.19741 | 0.235043 | -5.09444 | 1.68E-06 | 6.16E-05 | 0.044047 |
| ENSG0000 response | Inflamed | SPDEF     | protein_cc | chr6  | 34505579 | 34524110 | - | 1914  | 2374.78  | 0        | 1.072839 | 0.21066  | 5.092759 | 1.69E-06 | 6.20E-05 | 0.044357 |
| ENSG0000 response | Inflamed | RAMP3     | protein_cc | chr7  | 45197390 | 45225901 | + | 1427  | 755.6158 | 0        | -1.07754 | 0.211664 | -5.09081 | 1.70E-06 | 6.24E-05 | 0.04472  |
| ENSG0000 response | Inflamed | NFATC1    | protein_cc | chr18 | 77155856 | 77289325 | + | 7008  | 659.4296 | 0        | -0.9945  | 0.195413 | -5.08925 | 1.71E-06 | 6.27E-05 | 0.045012 |
| ENSG0000 response | Inflamed | ICAM2     | protein_cc | chr17 | 62079954 | 62097994 | - | 3243  | 813.8115 | 0        | -0.89409 | 0.175796 | -5.08594 | 1.74E-06 | 6.35E-05 | 0.045638 |
| ENSG0000 response | Inflamed | RP11-794C | lincRNA    | chr11 | 61306988 | 61309731 | - | 1831  | 40.53938 | 0.0358   | 1.197545 | 0.235525 | 5.084585 | 1.75E-06 | 6.37E-05 | 0.045898 |
| ENSG0000 response | Inflamed | IL1B      | protein_cc | chr2  | 1.14E+08 | 1.14E+08 | - | 3096  | 3775.084 | 0        | -1.91706 | 0.377286 | -5.08118 | 1.77E-06 | 6.45E-05 | 0.046556 |
| ENSG0000 response | Inflamed | MSC       | protein_cc | chr8  | 72753784 | 72756703 | - | 2113  | 491.969  | 0        | -1.07036 | 0.210658 | -5.08101 | 1.77E-06 | 6.45E-05 | 0.046587 |
| ENSG0000 response | Inflamed | MAD2L2    | protein_cc | chr1  | 11734537 | 11751707 | - | 3324  | 449.9475 | 0        | -0.68682 | 0.135194 | -5.08023 | 1.78E-06 | 6.46E-05 | 0.046739 |
| ENSG0000 response | Inflamed | FAM212A   | protein_cc | chr3  | 49840687 | 49842463 | + | 1040  | 44.84964 | 0        | -0.86565 | 0.170407 | -5.07989 | 1.78E-06 | 6.46E-05 | 0.046806 |
| ENSG0000 response | Inflamed | COL7A1    | protein_cc | chr3  | 48601506 | 48632700 | - | 11071 | 3527.107 | 0        | -1.77932 | 0.350332 | -5.07895 | 1.79E-06 | 6.48E-05 | 0.04699  |
| ENSG0000 response | Inflamed | DOK2      | protein_cc | chr8  | 21766384 | 21771371 | - | 2211  | 823.8043 | 0        | -0.69306 | 0.136462 | -5.07878 | 1.79E-06 | 6.48E-05 | 0.047023 |
| ENSG0000 response | Inflamed | RP11-164F | antisense  | chr4  | 1.53E+08 | 1.53E+08 | + | 304   | 26.52029 | 0.02864  | 0.892369 | 0.175735 | 5.077922 | 1.80E-06 | 6.49E-05 | 0.047192 |
| ENSG0000 response | Inflamed | IGHV6-1   | IG_V_gene  | chr14 | 1.06E+08 | 1.06E+08 | - | 415   | 3655.678 | 0        | -1.62342 | 0.31973  | -5.07748 | 1.80E-06 | 6.49E-05 | 0.04728  |
| ENSG0000 response | Inflamed | SLC24A4   | protein_cc | chr14 | 92788925 | 92962596 | + | 9181  | 55.95943 | 0.011933 | -0.96948 | 0.190953 | -5.07709 | 1.80E-06 | 6.50E-05 | 0.047356 |
| ENSG0000 response | Inflamed | DOC2B     | protein_cc | chr17 | 5810     | 31427    | - | 1480  | 228.7924 | 0.004773 | -1.27435 | 0.251021 | -5.07667 | 1.80E-06 | 6.50E-05 | 0.047438 |
| ENSG0000 response | Inflamed | PRDX4     | protein_cc | chrX  | 23682379 | 23704516 | + | 1904  | 2190.401 | 0        | -0.67519 | 0.133111 | -5.07236 | 1.84E-06 | 6.61E-05 | 0.048299 |
| ENSG0000 response | Inflamed | GJA5      | protein_cc | chr1  | 1.47E+08 | 1.47E+08 | - | 3256  | 258.8711 | 0.009547 | -1.35408 | 0.267029 | -5.07092 | 1.85E-06 | 6.64E-05 | 0.04859  |
| ENSG0000 response | Inflamed | PARVB     | protein_cc | chr22 | 44395091 | 44568829 | + | 7330  | 821.1002 | 0        | -0.76357 | 0.150589 | -5.07057 | 1.85E-06 | 6.64E-05 | 0.04866  |
| ENSG0000 response | Inflamed | EVI2B     | protein_cc | chr17 | 29630784 | 29641130 | - | 2072  | 1046.835 | 0        | -1.01916 | 0.201067 | -5.06875 | 1.87E-06 | 6.68E-05 | 0.049032 |
| ENSG0000 response | Inflamed | FCGR1B    | protein_cc | chr1  | 1.21E+08 | 1.21E+08 | - | 1392  | 32.4105  | 0.057279 | -1.35077 | 0.266534 | -5.06789 | 1.87E-06 | 6.69E-05 | 0.049208 |
| ENSG0000 response | Inflamed | FAM49A    | protein_cc | chr2  | 16730727 | 16847599 | - | 5448  | 581.0955 | 0        | -0.97215 | 0.191832 | -5.06773 | 1.87E-06 | 6.69E-05 | 0.049241 |
| ENSG0000 response | Inflamed | KRT23     | protein_cc | chr17 | 39078948 | 39093886 | - | 2902  | 44.39379 | 0.023866 | -1.6296  | 0.321903 | -5.06239 | 1.92E-06 | 6.83E-05 | 0.050348 |
| ENSG0000 response | Inflamed | LINC0057C | lincRNA    | chr2  | 11534107 | 11543203 | + | 1650  | 14.87351 | 0.062053 | 0.964881 | 0.190607 | 5.062138 | 1.92E-06 | 6.83E-05 | 0.050401 |
| ENSG0000 response | Inflamed | LCP1      | protein_cc | chr13 | 46700055 | 46786006 | - | 5216  | 7455.661 | 0        | -1.02902 | 0.203288 | -5.06187 | 1.92E-06 | 6.83E-05 | 0.050457 |
| ENSG0000 response | Inflamed | SLC4A11   | protein_cc | chr20 | 3208063  | 3219836  | - | 4081  | 176.3604 | 0.004773 | -1.09779 | 0.216919 | -5.06084 | 1.93E-06 | 6.85E-05 | 0.050674 |
| ENSG0000 response | Inflamed | RAB15     | protein_cc | chr14 | 65412532 | 65439494 | - | 4379  | 2460.1   | 0        | 0.627822 | 0.124075 | 5.06001  | 1.93E-06 | 6.86E-05 | 0.05085  |
| ENSG0000 response | Inflamed | ADAM19    | protein_cc | chr5  | 1.57E+08 | 1.57E+08 | - | 7710  | 3459.294 | 0        | -0.84592 | 0.167219 | -5.05877 | 1.94E-06 | 6.89E-05 | 0.051114 |
| ENSG0000 response | Inflamed | GCKR      | protein_cc | chr2  | 27719709 | 27746554 | + | 3149  | 15.31981 | 0.112172 | -1.08419 | 0.214379 | -5.05737 | 1.96E-06 | 6.92E-05 | 0.051413 |
| ENSG0000 response | Inflamed | TXNDC5    | protein_cc | chr6  | 7881483  | 8026646  | - | 4701  | 977.0811 | 0        | -0.84642 | 0.167456 | -5.05456 | 1.98E-06 | 6.99E-05 | 0.052017 |
| ENSG0000 response | Inflamed | C2orf54   | protein_cc | chr2  | 2.42E+08 | 2.42E+08 | - | 2772  | 209.0239 | 0.009547 | 1.321612 | 0.261542 | 5.053159 | 1.99E-06 | 7.02E-05 | 0.052321 |
| ENSG0000 response | Inflamed | RHBDF2    | protein_cc | chr17 | 74466973 | 74497872 | - | 6927  | 1843.814 | 0        | -0.79034 | 0.156425 | -5.05255 | 2.00E-06 | 7.03E-05 | 0.052453 |
| ENSG0000 response | Inflamed | IGLV3-21  | IG_V_gene  | chr22 | 23054174 | 23055688 | + | 602   | 10603.73 | 0        | -1.60542 | 0.317765 | -5.05223 | 2.00E-06 | 7.03E-05 | 0.052523 |
| ENSG0000 response | Inflamed | RP11-497F | pseudoger  | chr5  | 69758071 | 69775042 | + | 1104  | 9.331742 | 0.054893 | -0.79618 | 0.157621 | -5.05123 | 2.01E-06 | 7.04E-05 | 0.052742 |
| ENSG0000 response | Inflamed | GNG8      | protein_cc | chr19 | 47137333 | 47137942 | - | 216   | 5.553699 | 0.24105  | -0.82818 | 0.163957 | -5.05118 | 2.01E-06 | 7.04E-05 | 0.052754 |
| ENSG0000 response | Inflamed | PREX1     | protein_cc | chr20 | 47240790 | 47444420 | - | 7044  | 4081.931 | 0        | -0.87279 | 0.173056 | -5.04343 | 2.07E-06 | 7.26E-05 | 0.054482 |
| ENSG0000 response | Inflamed | SEMA7A    | protein_cc | chr15 | 74701630 | 74726808 | - | 4309  | 825.821  | 0        | -1.0581  | 0.209803 | -5.04332 | 2.07E-06 | 7.26E-05 | 0.054508 |
| ENSG0000 response | Inflamed | ESM1      | protein_cc | chr5  | 54273692 | 54318499 | - | 2695  | 13.17184 | 0.190931 | -1.29187 | 0.256225 | -5.04195 | 2.09E-06 | 7.29E-05 | 0.054818 |
| ENSG0000 response | Inflamed | IFI30     | protein_cc | chr19 | 18283972 | 18288927 | + | 2481  | 819.1885 | 0        | -0.84311 | 0.167233 | -5.04154 | 2.09E-06 | 7.29E-05 | 0.054911 |

|                   |          |           |                  |          |          |   |       |          |          |          |          |          |          |          |          |
|-------------------|----------|-----------|------------------|----------|----------|---|-------|----------|----------|----------|----------|----------|----------|----------|----------|
| ENSG0000 response | Inflamed | AP001324  | pseudoger chr11  | 74409389 | 74409869 | - | 480   | 4.083532 | 0.546539 | -1.12706 | 0.22356  | -5.04143 | 2.09E-06 | 7.29E-05 | 0.054936 |
| ENSG0000 response | Inflamed | B3GNT8    | protein_cc chr19 | 41931264 | 41934635 | - | 1874  | 1291.685 | 0        | 0.757296 | 0.150246 | 5.040362 | 2.10E-06 | 7.31E-05 | 0.055181 |
| ENSG0000 response | Inflamed | KLK7      | protein_cc chr19 | 51479729 | 51487355 | - | 2443  | 218.1742 | 0.470167 | -3.04288 | 0.603729 | -5.04015 | 2.10E-06 | 7.31E-05 | 0.055231 |
| ENSG0000 response | Inflamed | IGKC      | IG_C_gene chr2   | 89156674 | 89157196 | - | 523   | 644.8998 | 0        | -1.54847 | 0.307296 | -5.03901 | 2.11E-06 | 7.33E-05 | 0.055492 |
| ENSG0000 response | Inflamed | VAMP5     | protein_cc chr2  | 85811531 | 85820535 | + | 819   | 458.8258 | 0        | -0.71474 | 0.141892 | -5.03719 | 2.13E-06 | 7.38E-05 | 0.055914 |
| ENSG0000 response | Inflamed | MCF2L-AS  | antisense chr13  | 1.14E+08 | 1.14E+08 | - | 712   | 58.92363 | 0.002387 | 0.773823 | 0.153648 | 5.036322 | 2.13E-06 | 7.39E-05 | 0.056115 |
| ENSG0000 response | Inflamed | SIPA1     | protein_cc chr11 | 65405568 | 65418401 | + | 4668  | 2610.809 | 0        | -0.72192 | 0.143349 | -5.03606 | 2.14E-06 | 7.39E-05 | 0.056176 |
| ENSG0000 response | Inflamed | QPCT      | protein_cc chr2  | 37571717 | 37600465 | + | 2599  | 348.2434 | 0        | -0.75454 | 0.149845 | -5.03544 | 2.14E-06 | 7.40E-05 | 0.056321 |
| ENSG0000 response | Inflamed | CADM1     | protein_cc chr11 | 1.15E+08 | 1.15E+08 | - | 11015 | 635.2554 | 0        | -1.12963 | 0.224367 | -5.03475 | 2.15E-06 | 7.41E-05 | 0.056482 |
| ENSG0000 response | Inflamed | SLAMF1    | protein_cc chr1  | 1.61E+08 | 1.61E+08 | - | 4219  | 446      | 0        | -1.03195 | 0.204994 | -5.03406 | 2.15E-06 | 7.42E-05 | 0.056644 |
| ENSG0000 response | Inflamed | TBX10     | protein_cc chr11 | 67398774 | 67407031 | - | 1548  | 476.673  | 0.002387 | 1.557616 | 0.309493 | 5.032793 | 2.17E-06 | 7.45E-05 | 0.056944 |
| ENSG0000 response | Inflamed | NINJ1     | protein_cc chr9  | 95883771 | 95896570 | - | 2648  | 1883.208 | 0        | -0.70026 | 0.139143 | -5.03264 | 2.17E-06 | 7.45E-05 | 0.05698  |
| ENSG0000 response | Inflamed | SIRPB2    | protein_cc chr20 | 1451386  | 1472233  | - | 5199  | 250.2411 | 0.002387 | -1.00883 | 0.200506 | -5.03139 | 2.18E-06 | 7.48E-05 | 0.057277 |
| ENSG0000 response | Inflamed | RP11-486A | pseudoger chr12  | 93708585 | 93709717 | + | 1133  | 44.18616 | 0.01432  | 0.975774 | 0.193971 | 5.030524 | 2.19E-06 | 7.49E-05 | 0.057483 |
| ENSG0000 response | Inflamed | MOB3A     | protein_cc chr19 | 2071037  | 2096672  | - | 4149  | 3882.749 | 0        | -0.53488 | 0.106327 | -5.03051 | 2.19E-06 | 7.49E-05 | 0.057487 |
| ENSG0000 response | Inflamed | OLFM1     | protein_cc chr9  | 1.38E+08 | 1.38E+08 | + | 6123  | 1070.568 | 0        | -1.14276 | 0.227193 | -5.02991 | 2.19E-06 | 7.49E-05 | 0.057629 |
| ENSG0000 response | Inflamed | IGKV1-9   | IG_V_gene chr2   | 89309479 | 89310012 | - | 409   | 10470.12 | 0        | -1.54095 | 0.306622 | -5.02559 | 2.23E-06 | 7.62E-05 | 0.058673 |
| ENSG0000 response | Inflamed | ANKRD16   | protein_cc chr10 | 5903580  | 5931869  | - | 3059  | 260.42   | 0        | -0.42558 | 0.08469  | -5.02513 | 2.24E-06 | 7.62E-05 | 0.058785 |
| ENSG0000 response | Inflamed | HERPUD1   | protein_cc chr16 | 56965960 | 56977798 | + | 4178  | 11964.32 | 0        | -0.5194  | 0.103399 | -5.02327 | 2.25E-06 | 7.67E-05 | 0.05924  |
| ENSG0000 response | Inflamed | AC096579  | processed_chr2   | 89109984 | 89161075 | - | 1653  | 54.45107 | 0.009547 | -1.12887 | 0.224756 | -5.02266 | 2.26E-06 | 7.67E-05 | 0.059391 |
| ENSG0000 response | Inflamed | METTL7B   | protein_cc chr12 | 56075330 | 56078395 | + | 1506  | 1088.148 | 0        | 0.874809 | 0.174174 | 5.022628 | 2.26E-06 | 7.67E-05 | 0.059398 |
| ENSG0000 response | Inflamed | PRR26     | protein_cc chr10 | 695888   | 711109   | + | 4833  | 288.8305 | 0        | 0.81635  | 0.162542 | 5.022382 | 2.26E-06 | 7.67E-05 | 0.059458 |
| ENSG0000 response | Inflamed | CHAD      | protein_cc chr17 | 48541857 | 48546327 | - | 1802  | 238.6468 | 0.00716  | 1.676402 | 0.333885 | 5.020901 | 2.28E-06 | 7.71E-05 | 0.059825 |
| ENSG0000 response | Inflamed | ST8SIA4   | protein_cc chr5  | 1E+08    | 1E+08    | - | 7794  | 507.1098 | 0        | -0.97934 | 0.195147 | -5.01845 | 2.30E-06 | 7.78E-05 | 0.060436 |
| ENSG0000 response | Inflamed | BEAN1     | protein_cc chr16 | 66461200 | 66527432 | + | 7165  | 36.90692 | 0.105012 | -1.58513 | 0.315912 | -5.01762 | 2.31E-06 | 7.79E-05 | 0.060644 |
| ENSG0000 response | Inflamed | CTD-2369F | lincRNA chr19    | 10332111 | 10333870 | - | 1760  | 287.0621 | 0        | -0.72674 | 0.14486  | -5.01682 | 2.31E-06 | 7.81E-05 | 0.060845 |
| ENSG0000 response | Inflamed | SLC20A2   | protein_cc chr8  | 42273993 | 42397069 | - | 6641  | 3112.487 | 0        | 0.618292 | 0.123282 | 5.015242 | 2.33E-06 | 7.83E-05 | 0.061245 |
| ENSG0000 response | Inflamed | CA10      | protein_cc chr17 | 49707674 | 50237377 | - | 4450  | 7.403341 | 0.24105  | 0.848199 | 0.169127 | 5.015151 | 2.33E-06 | 7.83E-05 | 0.061268 |
| ENSG0000 response | Inflamed | ACADS     | protein_cc chr12 | 1.21E+08 | 1.21E+08 | + | 2648  | 5616.556 | 0        | 0.700702 | 0.139721 | 5.015002 | 2.33E-06 | 7.83E-05 | 0.061306 |
| ENSG0000 response | Inflamed | VWF       | protein_cc chr12 | 6058040  | 6233936  | - | 9925  | 9569.983 | 0        | -1.30395 | 0.260018 | -5.01484 | 2.33E-06 | 7.83E-05 | 0.061348 |
| ENSG0000 response | Inflamed | MMP12     | processed_chr11  | 1.03E+08 | 1.03E+08 | - | 1879  | 3511.969 | 0        | -1.41109 | 0.281394 | -5.01463 | 2.34E-06 | 7.83E-05 | 0.061401 |
| ENSG0000 response | Inflamed | PCOLCE    | protein_cc chr7  | 1E+08    | 1E+08    | + | 3532  | 2850.444 | 0        | -1.04005 | 0.207412 | -5.0144  | 2.34E-06 | 7.83E-05 | 0.06146  |
| ENSG0000 response | Inflamed | CTD-2306F | lincRNA chr5     | 66475441 | 66476415 | - | 975   | 31.23389 | 0.01432  | -0.95305 | 0.190096 | -5.0135  | 2.35E-06 | 7.85E-05 | 0.061688 |
| ENSG0000 response | Inflamed | MT-CO2    | protein_cc chrM  | 7586     | 8269     | + | 684   | 850853.2 | 0        | 0.598708 | 0.119453 | 5.012072 | 2.36E-06 | 7.88E-05 | 0.062055 |
| ENSG0000 response | Inflamed | IGFBP4    | protein_cc chr17 | 38599702 | 38613983 | + | 2211  | 14504.21 | 0        | -0.75435 | 0.150549 | -5.01068 | 2.37E-06 | 7.92E-05 | 0.062414 |
| ENSG0000 response | Inflamed | RP11-386C | antisense chr12  | 49392150 | 49412988 | + | 2208  | 13.01432 | 0.02864  | -0.80639 | 0.160957 | -5.00999 | 2.38E-06 | 7.93E-05 | 0.062593 |
| ENSG0000 response | Inflamed | SLC15A3   | protein_cc chr11 | 60704556 | 60720002 | - | 6118  | 1743.453 | 0        | -0.69604 | 0.138965 | -5.00869 | 2.39E-06 | 7.97E-05 | 0.06293  |
| ENSG0000 response | Inflamed | RP11-598F | lincRNA chr12    | 276022   | 291565   | - | 1184  | 16.65871 | 0.205251 | -1.40109 | 0.279816 | -5.00719 | 2.41E-06 | 8.00E-05 | 0.063323 |
| ENSG0000 response | Inflamed | FCGR3A    | protein_cc chr1  | 1.62E+08 | 1.62E+08 | - | 2977  | 995.9308 | 0        | -1.2359  | 0.246835 | -5.00698 | 2.41E-06 | 8.00E-05 | 0.063378 |
| ENSG0000 response | Inflamed | CMTM7     | protein_cc chr3  | 32433163 | 32524559 | + | 3751  | 644.2673 | 0        | -0.69202 | 0.13824  | -5.00597 | 2.42E-06 | 8.03E-05 | 0.063644 |

|                   |          |                     |                  |          |          |   |       |          |          |          |          |          |          |          |          |
|-------------------|----------|---------------------|------------------|----------|----------|---|-------|----------|----------|----------|----------|----------|----------|----------|----------|
| ENSG0000 response | Inflamed | RP11-125E antisense | chr9             | 2422702  | 2641395  | - | 4399  | 13.04535 | 0.221957 | 1.171966 | 0.234141 | 5.005383 | 2.43E-06 | 8.04E-05 | 0.063798 |
| ENSG0000 response | Inflamed | RP11-395F antisense | chr9             | 1.31E+08 | 1.31E+08 | - | 745   | 350.1862 | 0        | 0.843878 | 0.168634 | 5.004211 | 2.44E-06 | 8.06E-05 | 0.064109 |
| ENSG0000 response | Inflamed | ARHGAP44            | protein_cc chr17 | 12692856 | 12894960 | + | 9281  | 2439.105 | 0        | 0.874766 | 0.174864 | 5.002554 | 2.46E-06 | 8.11E-05 | 0.06455  |
| ENSG0000 response | Inflamed | PCED1B              | protein_cc chr12 | 47473386 | 47630443 | + | 2616  | 428.3938 | 0        | -0.89869 | 0.179676 | -5.00174 | 2.46E-06 | 8.12E-05 | 0.064767 |
| ENSG0000 response | Inflamed | PWWP2B              | protein_cc chr10 | 1.34E+08 | 1.34E+08 | + | 2651  | 1759.687 | 0        | 0.484187 | 0.096813 | 5.001276 | 2.47E-06 | 8.12E-05 | 0.064892 |
| ENSG0000 response | Inflamed | COL18A1             | protein_cc chr21 | 46825052 | 46933634 | + | 8525  | 9513.974 | 0        | -1.12406 | 0.224761 | -5.00112 | 2.47E-06 | 8.12E-05 | 0.064934 |
| ENSG0000 response | Inflamed | PI15                | protein_cc chr8  | 75736772 | 75767264 | + | 7156  | 489.3055 | 0.02864  | -2.28812 | 0.457532 | -5.00101 | 2.47E-06 | 8.12E-05 | 0.064963 |
| ENSG0000 response | Inflamed | CCDC175             | protein_cc chr14 | 59971257 | 60043549 | - | 3245  | 5.054893 | 0.329356 | 0.993905 | 0.198781 | 4.999991 | 2.48E-06 | 8.14E-05 | 0.065238 |
| ENSG0000 response | Inflamed | TLR2                | protein_cc chr4  | 1.55E+08 | 1.55E+08 | + | 4200  | 442.6611 | 0        | -1.27335 | 0.254695 | -4.99952 | 2.49E-06 | 8.15E-05 | 0.065367 |
| ENSG0000 response | Inflamed | GJA4                | protein_cc chr1  | 35258599 | 35261348 | + | 1717  | 320.4153 | 0.002387 | -1.24853 | 0.249758 | -4.99896 | 2.49E-06 | 8.16E-05 | 0.065516 |
| ENSG0000 response | Inflamed | HTRA3               | protein_cc chr4  | 8271492  | 8308838  | + | 3321  | 1223.031 | 0        | -1.20815 | 0.241759 | -4.99733 | 2.51E-06 | 8.20E-05 | 0.06596  |
| ENSG0000 response | Inflamed | FAM163B             | protein_cc chr9  | 1.36E+08 | 1.36E+08 | - | 811   | 14.49165 | 0.357995 | 1.497244 | 0.299624 | 4.997077 | 2.51E-06 | 8.20E-05 | 0.06603  |
| ENSG0000 response | Inflamed | IGHV1-18            | IG_V_gene chr14  | 1.07E+08 | 1.07E+08 | - | 410   | 10762.1  | 0        | -1.51491 | 0.303164 | -4.99699 | 2.51E-06 | 8.20E-05 | 0.066054 |
| ENSG0000 response | Inflamed | ALOX15B             | protein_cc chr17 | 7942335  | 7952452  | + | 3028  | 115.7709 | 0.002387 | -1.16362 | 0.232922 | -4.99574 | 2.53E-06 | 8.23E-05 | 0.066395 |
| ENSG0000 response | Inflamed | CHRM1               | protein_cc chr11 | 62676151 | 62689279 | - | 3250  | 105.611  | 0.009547 | 1.232209 | 0.246736 | 4.994034 | 2.54E-06 | 8.28E-05 | 0.066866 |
| ENSG0000 response | Inflamed | SPHK1               | protein_cc chr17 | 74372665 | 74383941 | + | 4416  | 570.2649 | 0        | -1.12813 | 0.225932 | -4.99322 | 2.55E-06 | 8.29E-05 | 0.067091 |
| ENSG0000 response | Inflamed | SAMD14              | protein_cc chr17 | 48187404 | 48207246 | - | 7016  | 214.5346 | 0        | -0.8428  | 0.168852 | -4.99134 | 2.57E-06 | 8.35E-05 | 0.067616 |
| ENSG0000 response | Inflamed | LINC00094           | antisense chr9   | 1.37E+08 | 1.37E+08 | + | 5994  | 510.3461 | 0        | -0.49734 | 0.09977  | -4.9849  | 2.64E-06 | 8.56E-05 | 0.069438 |
| ENSG0000 response | Inflamed | CERCAM              | protein_cc chr9  | 1.31E+08 | 1.31E+08 | + | 6054  | 1431.647 | 0        | -0.94604 | 0.189879 | -4.98235 | 2.67E-06 | 8.63E-05 | 0.070173 |
| ENSG0000 response | Inflamed | AAED1               | protein_cc chr9  | 99401859 | 99417585 | - | 3084  | 261.5418 | 0        | -0.63834 | 0.128126 | -4.98216 | 2.67E-06 | 8.63E-05 | 0.070231 |
| ENSG0000 response | Inflamed | IGHGP               | IG_C_pseu chr14  | 1.06E+08 | 1.06E+08 | - | 1178  | 3141.74  | 0.002387 | -2.05196 | 0.411875 | -4.982   | 2.67E-06 | 8.63E-05 | 0.070275 |
| ENSG0000 response | Inflamed | BAIAP2L2            | protein_cc chr22 | 38480896 | 38506677 | - | 2194  | 3010.177 | 0        | 0.864682 | 0.1736   | 4.980884 | 2.69E-06 | 8.66E-05 | 0.0706   |
| ENSG0000 response | Inflamed | WFIKKN1             | protein_cc chr16 | 679239   | 684116   | + | 4878  | 79.0358  | 0.00716  | 0.894575 | 0.179618 | 4.98042  | 2.69E-06 | 8.67E-05 | 0.070736 |
| ENSG0000 response | Inflamed | IGKV3D-15           | IG_V_gene chr2   | 90153696 | 90154258 | + | 394   | 1237.723 | 0.002387 | -1.56053 | 0.31336  | -4.98001 | 2.70E-06 | 8.67E-05 | 0.070855 |
| ENSG0000 response | Inflamed | MT-TF               | Mt_tRNA chrM     | 577      | 647      | + | 71    | 278.9666 | 0        | 1.085219 | 0.217948 | 4.979245 | 2.70E-06 | 8.69E-05 | 0.07108  |
| ENSG0000 response | Inflamed | LINC00888           | pseudoger chr3   | 1.83E+08 | 1.83E+08 | + | 2131  | 93.8926  | 0        | -0.75748 | 0.152153 | -4.9784  | 2.71E-06 | 8.71E-05 | 0.071328 |
| ENSG0000 response | Inflamed | VSIG10              | protein_cc chr12 | 1.19E+08 | 1.19E+08 | - | 7060  | 2561.585 | 0        | 0.795951 | 0.159905 | 4.977636 | 2.72E-06 | 8.73E-05 | 0.071554 |
| ENSG0000 response | Inflamed | CNPY3               | protein_cc chr6  | 42896938 | 42907025 | + | 1704  | 1789.208 | 0        | -0.43364 | 0.087132 | -4.97684 | 2.73E-06 | 8.74E-05 | 0.071789 |
| ENSG0000 response | Inflamed | IGLV3-10            | IG_V_gene chr22  | 23154244 | 23154782 | + | 386   | 3816.468 | 0        | -1.56632 | 0.314773 | -4.97603 | 2.74E-06 | 8.76E-05 | 0.072029 |
| ENSG0000 response | Inflamed | KLHL5               | protein_cc chr4  | 39046659 | 39128477 | + | 5144  | 716.6802 | 0        | -1.08505 | 0.218089 | -4.97526 | 2.75E-06 | 8.78E-05 | 0.072258 |
| ENSG0000 response | Inflamed | RP11-5544           | sense_ove chr11  | 68768233 | 68769516 | - | 1284  | 55.83055 | 0.00716  | -1.23234 | 0.247703 | -4.97508 | 2.75E-06 | 8.78E-05 | 0.072313 |
| ENSG0000 response | Inflamed | APBA2               | protein_cc chr15 | 29129629 | 29410518 | + | 6869  | 418      | 0        | -0.92082 | 0.185099 | -4.97476 | 2.75E-06 | 8.78E-05 | 0.072409 |
| ENSG0000 response | Inflamed | FER1L4              | pseudoger chr20  | 34146507 | 34195484 | - | 9212  | 1416.384 | 0.002387 | -1.36416 | 0.274388 | -4.97164 | 2.79E-06 | 8.87E-05 | 0.073346 |
| ENSG0000 response | Inflamed | TENM4               | protein_cc chr11 | 78363876 | 79151992 | - | 16330 | 295.6205 | 0.00716  | -1.34132 | 0.26983  | -4.97096 | 2.80E-06 | 8.87E-05 | 0.073553 |
| ENSG0000 response | Inflamed | GPR4                | protein_cc chr19 | 46093022 | 46105466 | - | 3145  | 313.0286 | 0.002387 | -1.33556 | 0.268683 | -4.97076 | 2.80E-06 | 8.87E-05 | 0.073614 |
| ENSG0000 response | Inflamed | RP11-5030           | sense_intr chr6  | 1.69E+08 | 1.69E+08 | - | 2559  | 10.9642  | 0.238663 | 0.965848 | 0.194314 | 4.970567 | 2.80E-06 | 8.87E-05 | 0.073672 |
| ENSG0000 response | Inflamed | COL12A1             | protein_cc chr6  | 75794042 | 75915767 | - | 12476 | 5259.033 | 0        | -1.4432  | 0.290357 | -4.97045 | 2.80E-06 | 8.87E-05 | 0.073707 |
| ENSG0000 response | Inflamed | ATP8B2              | protein_cc chr1  | 1.54E+08 | 1.54E+08 | + | 7572  | 2209.274 | 0        | -0.85666 | 0.172368 | -4.96993 | 2.81E-06 | 8.87E-05 | 0.073867 |
| ENSG0000 response | Inflamed | INSL3               | protein_cc chr19 | 17927321 | 17932383 | - | 923   | 14.05967 | 0.093079 | -0.96796 | 0.194765 | -4.9699  | 2.81E-06 | 8.87E-05 | 0.073874 |
| ENSG0000 response | Inflamed | FAM167B             | protein_cc chr1  | 32712834 | 32714457 | + | 936   | 193.5322 | 0        | -0.77401 | 0.155748 | -4.96964 | 2.81E-06 | 8.87E-05 | 0.073955 |

|                   |          |           |                  |          |          |   |       |          |          |          |          |          |          |          |          |
|-------------------|----------|-----------|------------------|----------|----------|---|-------|----------|----------|----------|----------|----------|----------|----------|----------|
| ENSG0000 response | Inflamed | WIPF1     | protein_cc chr2  | 1.75E+08 | 1.76E+08 | - | 9121  | 3762.487 | 0        | -0.80816 | 0.162625 | -4.96947 | 2.81E-06 | 8.87E-05 | 0.074006 |
| ENSG0000 response | Inflamed | S1PR3     | protein_cc chr9  | 91606362 | 91619925 | + | 8754  | 506.0072 | 0.002387 | -1.16779 | 0.235059 | -4.96809 | 2.83E-06 | 8.91E-05 | 0.074428 |
| ENSG0000 response | Inflamed | PLA1A     | protein_cc chr3  | 1.19E+08 | 1.19E+08 | + | 2202  | 133.3294 | 0.004773 | -1.3196  | 0.265681 | -4.96686 | 2.85E-06 | 8.95E-05 | 0.074806 |
| ENSG0000 response | Inflamed | AP000695  | antisense chr21  | 37802658 | 37853368 | + | 893   | 3.274463 | 0.472554 | -0.7999  | 0.161084 | -4.96574 | 2.86E-06 | 8.98E-05 | 0.075155 |
| ENSG0000 response | Inflamed | SLC31A2   | protein_cc chr9  | 1.16E+08 | 1.16E+08 | + | 2504  | 551.9642 | 0        | -0.50754 | 0.102231 | -4.96468 | 2.87E-06 | 9.01E-05 | 0.075482 |
| ENSG0000 response | Inflamed | KCNA3     | protein_cc chr1  | 1.11E+08 | 1.11E+08 | - | 3346  | 337.5609 | 0        | -1.2035  | 0.242507 | -4.96273 | 2.89E-06 | 9.07E-05 | 0.07609  |
| ENSG0000 response | Inflamed | S100A3    | protein_cc chr1  | 1.54E+08 | 1.54E+08 | - | 955   | 42.53222 | 0.023866 | -1.27692 | 0.257333 | -4.96215 | 2.90E-06 | 9.08E-05 | 0.076275 |
| ENSG0000 response | Inflamed | FGD3      | protein_cc chr9  | 95709733 | 95798518 | + | 6055  | 1168.962 | 0        | -0.83808 | 0.168952 | -4.96047 | 2.92E-06 | 9.12E-05 | 0.076803 |
| ENSG0000 response | Inflamed | IL41I     | protein_cc chr19 | 50392911 | 50432796 | - | 2563  | 548.8473 | 0        | -1.14905 | 0.231656 | -4.96016 | 2.93E-06 | 9.12E-05 | 0.076901 |
| ENSG0000 response | Inflamed | IL12RB1   | protein_cc chr19 | 18169805 | 18209754 | - | 4298  | 583.284  | 0        | -0.76277 | 0.15378  | -4.96014 | 2.93E-06 | 9.12E-05 | 0.076908 |
| ENSG0000 response | Inflamed | ARSG      | protein_cc chr17 | 66255323 | 66418872 | + | 6587  | 171.0406 | 0        | -0.7552  | 0.152285 | -4.95911 | 2.94E-06 | 9.15E-05 | 0.077235 |
| ENSG0000 response | Inflamed | FGD2      | protein_cc chr6  | 36973422 | 36996846 | + | 10167 | 1538.294 | 0        | -0.76607 | 0.154489 | -4.95871 | 2.94E-06 | 9.16E-05 | 0.077363 |
| ENSG0000 response | Inflamed | RP11-1661 | antisense chr3   | 1.51E+08 | 1.51E+08 | + | 565   | 1.575179 | 0.799523 | -0.8521  | 0.171907 | -4.95675 | 2.97E-06 | 9.21E-05 | 0.077991 |
| ENSG0000 response | Inflamed | PLCD1     | protein_cc chr3  | 38048987 | 38071253 | - | 4314  | 2238.666 | 0        | 0.739521 | 0.149199 | 4.956621 | 2.97E-06 | 9.21E-05 | 0.078031 |
| ENSG0000 response | Inflamed | RP11-8551 | lincRNA chr17    | 65989996 | 65992547 | - | 414   | 3.789976 | 0.47494  | -0.94515 | 0.190723 | -4.95559 | 2.98E-06 | 9.24E-05 | 0.078363 |
| ENSG0000 response | Inflamed | LYL1      | protein_cc chr19 | 13209847 | 13213975 | - | 3119  | 418.2554 | 0        | -0.83459 | 0.168421 | -4.95541 | 2.98E-06 | 9.24E-05 | 0.078422 |
| ENSG0000 response | Inflamed | SLC35G2   | protein_cc chr3  | 1.37E+08 | 1.37E+08 | + | 4287  | 74.97136 | 0.004773 | -1.01332 | 0.204556 | -4.95377 | 3.00E-06 | 9.28E-05 | 0.078952 |
| ENSG0000 response | Inflamed | SEMA4D    | protein_cc chr9  | 91975702 | 92113045 | - | 14160 | 3351.649 | 0        | -0.71736 | 0.144814 | -4.95364 | 3.00E-06 | 9.28E-05 | 0.078996 |
| ENSG0000 response | Inflamed | OTUD7A    | protein_cc chr15 | 31775329 | 32162992 | - | 6624  | 83.00955 | 0.011933 | 0.667217 | 0.134707 | 4.953091 | 3.01E-06 | 9.28E-05 | 0.079174 |
| ENSG0000 response | Inflamed | CTB-134H  | pseudoger chr16  | 29065053 | 29119429 | - | 2180  | 53.09547 | 0.011933 | 1.260853 | 0.25456  | 4.953075 | 3.01E-06 | 9.28E-05 | 0.079179 |
| ENSG0000 response | Inflamed | LINC00675 | lincRNA chr17    | 10698230 | 10707416 | - | 1648  | 1688.477 | 0.002387 | 1.143191 | 0.230849 | 4.952114 | 3.02E-06 | 9.31E-05 | 0.079493 |
| ENSG0000 response | Inflamed | SLC13A2   | protein_cc chr17 | 26800311 | 26824799 | + | 3226  | 577.8687 | 0.0358   | 2.306976 | 0.466113 | 4.949388 | 3.06E-06 | 9.40E-05 | 0.08039  |
| ENSG0000 response | Inflamed | MSANTD3   | protein_cc chr9  | 1.03E+08 | 1.03E+08 | + | 2763  | 322.4511 | 0        | -0.67371 | 0.136161 | -4.94787 | 3.08E-06 | 9.45E-05 | 0.080895 |
| ENSG0000 response | Inflamed | RP11-8061 | lincRNA chr17    | 76356534 | 76369992 | + | 1188  | 18       | 0.138425 | -1.35594 | 0.274058 | -4.94765 | 3.08E-06 | 9.45E-05 | 0.080967 |
| ENSG0000 response | Inflamed | GS1-393G  | antisense chr8   | 1.46E+08 | 1.46E+08 | - | 444   | 152.0501 | 0        | 0.640605 | 0.129519 | 4.946034 | 3.10E-06 | 9.50E-05 | 0.081507 |
| ENSG0000 response | Inflamed | TMEM110   | protein_cc chr3  | 52870235 | 52931612 | - | 5730  | 96.34368 | 0        | -0.32612 | 0.065956 | -4.94447 | 3.12E-06 | 9.55E-05 | 0.082035 |
| ENSG0000 response | Inflamed | SLC39A11  | protein_cc chr17 | 70642088 | 71088851 | - | 5583  | 1525.045 | 0        | 0.470817 | 0.095237 | 4.943625 | 3.13E-06 | 9.57E-05 | 0.082319 |
| ENSG0000 response | Inflamed | SSTR1     | protein_cc chr14 | 38677204 | 38682272 | + | 4295  | 479.673  | 0.004773 | 1.139286 | 0.230477 | 4.943159 | 3.14E-06 | 9.58E-05 | 0.082477 |
| ENSG0000 response | Inflamed | FRZB      | protein_cc chr2  | 1.84E+08 | 1.84E+08 | - | 3162  | 929.8735 | 0        | 0.809956 | 0.163927 | 4.940955 | 3.17E-06 | 9.65E-05 | 0.083228 |
| ENSG0000 response | Inflamed | 06-Sep    | protein_cc chrX  | 1.19E+08 | 1.19E+08 | - | 6553  | 2034.036 | 0        | -0.74571 | 0.150927 | -4.94086 | 3.17E-06 | 9.65E-05 | 0.083262 |
| ENSG0000 response | Inflamed | NFKBIE    | protein_cc chr6  | 44225903 | 44233500 | - | 2556  | 1054.086 | 0        | -0.54935 | 0.111194 | -4.94043 | 3.17E-06 | 9.65E-05 | 0.083407 |
| ENSG0000 response | Inflamed | MIR1587   | lincRNA chrX     | 39696790 | 39707612 | - | 1976  | 4.599045 | 0.21957  | -0.73385 | 0.148555 | -4.93992 | 3.18E-06 | 9.66E-05 | 0.083583 |
| ENSG0000 response | Inflamed | CTC-5580  | antisense chr5   | 1.68E+08 | 1.68E+08 | + | 3478  | 45.07876 | 0.071599 | 1.408292 | 0.285133 | 4.939065 | 3.19E-06 | 9.69E-05 | 0.083878 |
| ENSG0000 response | Inflamed | B4GALNT2  | protein_cc chr17 | 47209822 | 47247351 | + | 2110  | 1450.208 | 0.01432  | 1.839097 | 0.372457 | 4.937746 | 3.21E-06 | 9.72E-05 | 0.084334 |
| ENSG0000 response | Inflamed | CHN2      | protein_cc chr7  | 29161890 | 29553944 | + | 10853 | 449.2888 | 0        | 0.798155 | 0.161645 | 4.937717 | 3.21E-06 | 9.72E-05 | 0.084344 |
| ENSG0000 response | Inflamed | MTMR11    | protein_cc chr1  | 1.5E+08  | 1.5E+08  | - | 4591  | 5468.012 | 0        | 0.838196 | 0.169836 | 4.935332 | 3.24E-06 | 9.80E-05 | 0.085175 |
| ENSG0000 response | Inflamed | TSHR      | protein_cc chr14 | 81421333 | 81612646 | + | 5519  | 40.24582 | 0.01432  | -1.12298 | 0.227556 | -4.93498 | 3.24E-06 | 9.80E-05 | 0.0853   |
| ENSG0000 response | Inflamed | RAPGEFL1  | protein_cc chr17 | 38333263 | 38351908 | + | 5710  | 6827.659 | 0        | 0.930216 | 0.188511 | 4.934545 | 3.25E-06 | 9.81E-05 | 0.08545  |
| ENSG0000 response | Inflamed | GBGT1     | protein_cc chr9  | 1.36E+08 | 1.36E+08 | - | 3708  | 292.1575 | 0        | -0.57656 | 0.11689  | -4.93248 | 3.28E-06 | 9.88E-05 | 0.08618  |
| ENSG0000 response | Inflamed | MMP8      | protein_cc chr11 | 1.03E+08 | 1.03E+08 | - | 3438  | 8.183771 | 0.534606 | -1.4706  | 0.298185 | -4.93184 | 3.29E-06 | 9.90E-05 | 0.086407 |

|                   |          |           |                  |          |          |   |       |          |          |          |          |          |          |          |          |
|-------------------|----------|-----------|------------------|----------|----------|---|-------|----------|----------|----------|----------|----------|----------|----------|----------|
| ENSG0000 response | Inflamed | PCED1B-A1 | processed_chr12  | 47599681 | 47610239 | - | 3092  | 402.4391 | 0        | -1.02265 | 0.207377 | -4.93137 | 3.29E-06 | 9.91E-05 | 0.086573 |
| ENSG0000 response | Inflamed | TRIB3     | protein_cc chr20 | 361261   | 378203   | + | 2948  | 308.4749 | 0        | -0.63036 | 0.127835 | -4.93102 | 3.30E-06 | 9.91E-05 | 0.086698 |
| ENSG0000 response | Inflamed | TTLL8     | protein_cc chr22 | 50453552 | 50495364 | - | 2707  | 2.210024 | 0.615752 | -0.77493 | 0.157232 | -4.92862 | 3.33E-06 | 1.00E-04 | 0.087557 |
| ENSG0000 response | Inflamed | IGSF6     | protein_cc chr16 | 21652609 | 21663981 | - | 1781  | 415.3508 | 0        | -0.99591 | 0.202126 | -4.92716 | 3.35E-06 | 0.0001   | 0.088081 |
| ENSG0000 response | Inflamed | HLX       | protein_cc chr1  | 2.21E+08 | 2.21E+08 | + | 4144  | 541.4129 | 0        | -0.81398 | 0.165204 | -4.92712 | 3.35E-06 | 0.0001   | 0.088098 |
| ENSG0000 response | Inflamed | GPR25     | protein_cc chr1  | 2.01E+08 | 2.01E+08 | + | 1224  | 28.03103 | 0.02148  | -0.97714 | 0.198336 | -4.92672 | 3.36E-06 | 0.0001   | 0.088241 |
| ENSG0000 response | Inflamed | TRAF1     | protein_cc chr9  | 1.24E+08 | 1.24E+08 | - | 6449  | 1299.191 | 0        | -0.90357 | 0.183519 | -4.92356 | 3.40E-06 | 0.000102 | 0.089392 |
| ENSG0000 response | Inflamed | PMFBP1    | protein_cc chr16 | 72146056 | 72210777 | - | 5691  | 51.01193 | 0.011933 | 1.054127 | 0.214162 | 4.922095 | 3.42E-06 | 0.000102 | 0.089933 |
| ENSG0000 response | Inflamed | TMEM204   | protein_cc chr16 | 1578689  | 1605581  | + | 2047  | 522.1169 | 0        | -0.78326 | 0.159176 | -4.92069 | 3.44E-06 | 0.000103 | 0.090453 |
| ENSG0000 response | Inflamed | SDK1      | protein_cc chr7  | 3341080  | 4308632  | + | 12045 | 1199.141 | 0        | -1.0713  | 0.21774  | -4.9201  | 3.45E-06 | 0.000103 | 0.090673 |
| ENSG0000 response | Inflamed | ATG4D     | protein_cc chr19 | 10654571 | 10664094 | + | 2278  | 1888.792 | 0        | 0.427791 | 0.086972 | 4.918729 | 3.47E-06 | 0.000103 | 0.091183 |
| ENSG0000 response | Inflamed | GPR137B   | protein_cc chr1  | 2.36E+08 | 2.36E+08 | + | 2279  | 833.7494 | 0        | -0.58132 | 0.118197 | -4.91828 | 3.47E-06 | 0.000103 | 0.091351 |
| ENSG0000 response | Inflamed | CWH43     | protein_cc chr4  | 48988264 | 49064098 | + | 3138  | 625.0095 | 0.019093 | 1.969079 | 0.400408 | 4.917676 | 3.48E-06 | 0.000103 | 0.091578 |
| ENSG0000 response | Inflamed | UBTD1     | protein_cc chr10 | 99258625 | 99330966 | + | 1706  | 238.5704 | 0        | -0.84444 | 0.171732 | -4.9172  | 3.49E-06 | 0.000103 | 0.091756 |
| ENSG0000 response | Inflamed | RP6-65G2  | lincRNA chr14    | 71165415 | 71178870 | + | 602   | 8.121718 | 0.310263 | -1.13691 | 0.231233 | -4.91673 | 3.50E-06 | 0.000104 | 0.091936 |
| ENSG0000 response | Inflamed | STAP2     | protein_cc chr19 | 4324040  | 4342783  | - | 2766  | 4181.702 | 0        | 0.856363 | 0.174187 | 4.916343 | 3.50E-06 | 0.000104 | 0.09208  |
| ENSG0000 response | Inflamed | MGAT4B    | protein_cc chr5  | 1.79E+08 | 1.79E+08 | - | 5495  | 14700.68 | 0        | 0.522335 | 0.106252 | 4.915997 | 3.51E-06 | 0.000104 | 0.092211 |
| ENSG0000 response | Inflamed | GP5       | protein_cc chr3  | 1.94E+08 | 1.94E+08 | - | 3563  | 10.26253 | 0.088305 | -0.82701 | 0.168256 | -4.91522 | 3.52E-06 | 0.000104 | 0.092507 |
| ENSG0000 response | Inflamed | RP1-229K2 | pseudoger chr6   | 41237613 | 41237977 | - | 365   | 4.756563 | 0.596659 | -1.18574 | 0.241246 | -4.91506 | 3.52E-06 | 0.000104 | 0.092566 |
| ENSG0000 response | Inflamed | RP11-554I | pseudoger chr12  | 1.08E+08 | 1.08E+08 | - | 679   | 6.584726 | 0.126492 | -0.89126 | 0.18134  | -4.91486 | 3.52E-06 | 0.000104 | 0.092641 |
| ENSG0000 response | Inflamed | TNFAIP2   | protein_cc chr14 | 1.04E+08 | 1.04E+08 | + | 5029  | 6577.599 | 0        | -1.00715 | 0.20494  | -4.91438 | 3.53E-06 | 0.000104 | 0.092823 |
| ENSG0000 response | Inflamed | VASN      | protein_cc chr16 | 4421849  | 4433529  | + | 2806  | 841.0716 | 0        | -1.11617 | 0.227127 | -4.91431 | 3.53E-06 | 0.000104 | 0.09285  |
| ENSG0000 response | Inflamed | CHAC1     | protein_cc chr15 | 41245160 | 41248710 | + | 2051  | 337.7088 | 0        | -1.05333 | 0.214401 | -4.91287 | 3.55E-06 | 0.000104 | 0.0934   |
| ENSG0000 response | Inflamed | AC106876  | protein_cc chr2  | 2.34E+08 | 2.34E+08 | + | 813   | 79.96897 | 0.011933 | 0.91394  | 0.186073 | 4.911729 | 3.57E-06 | 0.000105 | 0.093839 |
| ENSG0000 response | Inflamed | SCT       | protein_cc chr11 | 626431   | 627143   | - | 366   | 22.06683 | 0.02864  | 0.966945 | 0.196909 | 4.910612 | 3.59E-06 | 0.000105 | 0.094269 |
| ENSG0000 response | Inflamed | RFX8      | protein_cc chr2  | 1.02E+08 | 1.02E+08 | - | 2625  | 12.35322 | 0.23389  | -1.39031 | 0.283219 | -4.90897 | 3.61E-06 | 0.000106 | 0.094908 |
| ENSG0000 response | Inflamed | O3-Mar    | protein_cc chr5  | 1.26E+08 | 1.26E+08 | - | 5179  | 794.8663 | 0        | 0.475878 | 0.096966 | 4.90768  | 3.63E-06 | 0.000106 | 0.095409 |
| ENSG0000 response | Inflamed | AC073133  | lincRNA chr7     | 1.56E+08 | 1.56E+08 | - | 2698  | 21.05967 | 0.124105 | 1.219799 | 0.248579 | 4.907078 | 3.64E-06 | 0.000106 | 0.095645 |
| ENSG0000 response | Inflamed | RFTN1     | protein_cc chr3  | 16355081 | 16555533 | - | 4776  | 2173.263 | 0        | -0.88444 | 0.180283 | -4.90581 | 3.66E-06 | 0.000106 | 0.096141 |
| ENSG0000 response | Inflamed | COL8A1    | protein_cc chr3  | 99357319 | 99518070 | + | 9408  | 718.8544 | 0.009547 | -1.63894 | 0.334083 | -4.90577 | 3.66E-06 | 0.000106 | 0.096159 |
| ENSG0000 response | Inflamed | TMEM61    | protein_cc chr1  | 55446465 | 55457966 | + | 1097  | 242.8353 | 0.004773 | 1.049828 | 0.214048 | 4.904639 | 3.67E-06 | 0.000107 | 0.096605 |
| ENSG0000 response | Inflamed | FNDC4     | protein_cc chr2  | 27714750 | 27718112 | - | 1982  | 160.1718 | 0.002387 | -1.12868 | 0.230136 | -4.90439 | 3.68E-06 | 0.000107 | 0.096703 |
| ENSG0000 response | Inflamed | ITPKA     | protein_cc chr15 | 41785591 | 41795747 | + | 2090  | 867.6062 | 0        | 0.860235 | 0.175406 | 4.904245 | 3.68E-06 | 0.000107 | 0.096761 |
| ENSG0000 response | Inflamed | KIAA0930  | protein_cc chr22 | 45586219 | 45636650 | - | 10019 | 3982.141 | 0        | -0.4092  | 0.083444 | -4.90386 | 3.69E-06 | 0.000107 | 0.096912 |
| ENSG0000 response | Inflamed | SNAI3     | protein_cc chr16 | 88744090 | 88752901 | - | 1732  | 139.6301 | 0        | -0.71982 | 0.1468   | -4.90343 | 3.69E-06 | 0.000107 | 0.097085 |
| ENSG0000 response | Inflamed | IL10      | protein_cc chr1  | 2.07E+08 | 2.07E+08 | - | 1978  | 50.62053 | 0        | -0.90082 | 0.18373  | -4.90296 | 3.70E-06 | 0.000107 | 0.097273 |
| ENSG0000 response | Inflamed | RP1-85F18 | antisense chr22  | 41570595 | 41593460 | - | 457   | 4.906921 | 0.152745 | 0.630585 | 0.128633 | 4.902185 | 3.71E-06 | 0.000107 | 0.097581 |
| ENSG0000 response | Inflamed | ANK1      | protein_cc chr8  | 41510739 | 41754280 | - | 10799 | 186.5561 | 0.009547 | -1.24445 | 0.253894 | -4.90147 | 3.72E-06 | 0.000107 | 0.097868 |
| ENSG0000 response | Inflamed | IL27RA    | protein_cc chr19 | 14142560 | 14163743 | + | 2677  | 735.3461 | 0        | -0.81218 | 0.16571  | -4.90121 | 3.73E-06 | 0.000107 | 0.09797  |
| ENSG0000 response | Inflamed | MAPK13    | protein_cc chr6  | 36095586 | 36107842 | + | 2738  | 5227.874 | 0        | 0.457588 | 0.093368 | 4.900926 | 3.73E-06 | 0.000107 | 0.098085 |



|                   |          |           |                  |          |          |   |      |          |          |          |          |          |          |          |          |
|-------------------|----------|-----------|------------------|----------|----------|---|------|----------|----------|----------|----------|----------|----------|----------|----------|
| ENSG0000 response | Inflamed | MLC1      | protein_cc chr22 | 50497820 | 50524331 | - | 4297 | 54.46062 | 0.023866 | -1.29504 | 0.264271 | -4.90041 | 3.74E-06 | 0.000108 | 0.098291 |
| ENSG0000 response | Inflamed | CNN2      | protein_cc chr19 | 1026298  | 1039068  | + | 3928 | 6980.864 | 0        | -0.51396 | 0.104919 | -4.89869 | 3.77E-06 | 0.000108 | 0.098986 |
| ENSG0000 response | Inflamed | DHRS7C    | protein_cc chr17 | 9674751  | 9694614  | - | 1006 | 14.76611 | 0.140811 | 1.310587 | 0.267587 | 4.897794 | 3.78E-06 | 0.000108 | 0.09935  |
| ENSG0000 response | Inflamed | GRK6      | protein_cc chr5  | 1.77E+08 | 1.77E+08 | + | 4355 | 2815.265 | 0        | -0.40036 | 0.08175  | -4.8974  | 3.79E-06 | 0.000109 | 0.099509 |
| ENSG0000 response | Inflamed | NDUFA4L2  | protein_cc chr12 | 57628686 | 57634498 | - | 2806 | 287.1527 | 0        | -1.11407 | 0.227514 | -4.8967  | 3.80E-06 | 0.000109 | 0.099796 |
| ENSG0000 response | Inflamed | G RTP1    | protein_cc chr13 | 1.14E+08 | 1.14E+08 | - | 2656 | 1183.621 | 0        | 0.734414 | 0.149984 | 4.896612 | 3.80E-06 | 0.000109 | 0.099832 |
| ENSG0000 response | Inflamed | HPCA      | protein_cc chr1  | 33351595 | 33364042 | + | 1991 | 30.93317 | 0.00716  | 0.87497  | 0.178689 | 4.896592 | 3.80E-06 | 0.000109 | 0.09984  |
| ENSG0000 response | Inflamed | SMAP2     | protein_cc chr1  | 40810522 | 40888998 | + | 3436 | 4015.2   | 0        | -0.70703 | 0.144408 | -4.89609 | 3.81E-06 | 0.000109 | 0.100045 |
| ENSG0000 response | Inflamed | CA2       | protein_cc chr8  | 86376081 | 86393722 | + | 2123 | 25945.15 | 0        | 1.316171 | 0.268958 | 4.893587 | 3.84E-06 | 0.00011  | 0.101076 |
| ENSG0000 response | Inflamed | PDCD1     | protein_cc chr2  | 2.43E+08 | 2.43E+08 | - | 2114 | 270.136  | 0        | -1.04955 | 0.214489 | -4.89324 | 3.85E-06 | 0.00011  | 0.10122  |
| ENSG0000 response | Inflamed | CHST10    | protein_cc chr2  | 1.01E+08 | 1.01E+08 | - | 4482 | 134.3747 | 0        | -0.83449 | 0.170559 | -4.89271 | 3.86E-06 | 0.00011  | 0.10144  |
| ENSG0000 response | Inflamed | AC092652  | antisense chr2   | 1.44E+08 | 1.44E+08 | - | 735  | 3        | 0.53222  | 0.720986 | 0.147394 | 4.891562 | 3.88E-06 | 0.00011  | 0.101916 |
| ENSG0000 response | Inflamed | IGHV3-23  | IG_V_gene chr14  | 1.07E+08 | 1.07E+08 | - | 430  | 35873.8  | 0        | -1.46288 | 0.299139 | -4.89031 | 3.90E-06 | 0.000111 | 0.102439 |
| ENSG0000 response | Inflamed | RASSF2    | protein_cc chr20 | 4760669  | 4804291  | - | 5759 | 2158.943 | 0        | -0.92942 | 0.190075 | -4.88974 | 3.91E-06 | 0.000111 | 0.102676 |
| ENSG0000 response | Inflamed | RP11-5711 | 3prime_ov chr12  | 58117544 | 58119448 | - | 1905 | 30.95465 | 0.019093 | -0.76914 | 0.157318 | -4.8891  | 3.92E-06 | 0.000111 | 0.102946 |
| ENSG0000 response | Inflamed | UGT2B10   | protein_cc chr4  | 69681711 | 69696914 | + | 1931 | 4.46778  | 0.491647 | 0.745185 | 0.152562 | 4.884467 | 3.99E-06 | 0.000113 | 0.104916 |
| ENSG0000 response | Inflamed | OPRL1     | protein_cc chr20 | 62711526 | 62731996 | + | 3549 | 91.56802 | 0.004773 | -0.82071 | 0.168072 | -4.88306 | 4.01E-06 | 0.000113 | 0.10552  |
| ENSG0000 response | Inflamed | SMOX      | protein_cc chr20 | 4101627  | 4168394  | + | 4943 | 857.6874 | 0        | -0.99391 | 0.203606 | -4.88155 | 4.04E-06 | 0.000114 | 0.106175 |
| ENSG0000 response | Inflamed | IFITM3    | protein_cc chr11 | 319669   | 327537   | - | 1348 | 11468.4  | 0        | -0.78838 | 0.161549 | -4.88009 | 4.06E-06 | 0.000115 | 0.106807 |
| ENSG0000 response | Inflamed | RP11-317F | lincRNA chr1     | 1.83E+08 | 1.83E+08 | + | 1376 | 4.813842 | 0.207637 | -0.86756 | 0.177786 | -4.87979 | 4.07E-06 | 0.000115 | 0.106942 |
| ENSG0000 response | Inflamed | RP11-2751 | lincRNA chr15    | 38964048 | 38981392 | + | 815  | 7.575179 | 0.300716 | -1.11504 | 0.228579 | -4.87811 | 4.10E-06 | 0.000115 | 0.107676 |
| ENSG0000 response | Inflamed | PLOD1     | protein_cc chr1  | 11994262 | 12035595 | + | 5320 | 4224.115 | 0        | -0.53302 | 0.109274 | -4.87782 | 4.10E-06 | 0.000115 | 0.107806 |
| ENSG0000 response | Inflamed | AC141928  | lincRNA chr4     | 3760475  | 3765117  | - | 4525 | 19.32697 | 0.083532 | -1.01973 | 0.209165 | -4.87522 | 4.14E-06 | 0.000116 | 0.108955 |
| ENSG0000 response | Inflamed | IGSF5     | protein_cc chr21 | 41117334 | 41174023 | + | 2650 | 6.011933 | 0.312649 | 1.025492 | 0.21041  | 4.873768 | 4.17E-06 | 0.000117 | 0.109602 |
| ENSG0000 response | Inflamed | ANGPTL4   | protein_cc chr19 | 8428173  | 8439257  | + | 2482 | 668.0549 | 0        | -1.12693 | 0.231235 | -4.87353 | 4.17E-06 | 0.000117 | 0.109707 |
| ENSG0000 response | Inflamed | IKBIP     | protein_cc chr12 | 99007183 | 99038891 | - | 4163 | 376.0167 | 0        | -0.83806 | 0.171969 | -4.87331 | 4.18E-06 | 0.000117 | 0.109809 |
| ENSG0000 response | Inflamed | CMTM2     | protein_cc chr16 | 66613351 | 66622178 | + | 1151 | 37.52745 | 0.136038 | -1.63131 | 0.334799 | -4.87249 | 4.19E-06 | 0.000117 | 0.110174 |
| ENSG0000 response | Inflamed | CXorf36   | protein_cc chrX  | 45007619 | 45060146 | - | 6720 | 653.3986 | 0        | -0.89259 | 0.183226 | -4.87155 | 4.21E-06 | 0.000117 | 0.110598 |
| ENSG0000 response | Inflamed | FAM65B    | protein_cc chr6  | 24797601 | 25042238 | - | 7697 | 867.4368 | 0        | -1.45034 | 0.297724 | -4.87144 | 4.21E-06 | 0.000117 | 0.110647 |
| ENSG0000 response | Inflamed | MRAS      | protein_cc chr3  | 1.38E+08 | 1.38E+08 | + | 6315 | 488.7924 | 0        | -0.80323 | 0.16489  | -4.87135 | 4.21E-06 | 0.000117 | 0.11069  |
| ENSG0000 response | Inflamed | TDO2      | protein_cc chr4  | 1.57E+08 | 1.57E+08 | + | 5264 | 256.0811 | 0.002387 | -1.51008 | 0.310141 | -4.86902 | 4.25E-06 | 0.000118 | 0.111745 |
| ENSG0000 response | Inflamed | ELTD1     | protein_cc chr1  | 79355449 | 79472403 | - | 3527 | 392.599  | 0.002387 | -1.0762  | 0.221131 | -4.86682 | 4.29E-06 | 0.000119 | 0.112756 |
| ENSG0000 response | Inflamed | IHH       | protein_cc chr2  | 2.2E+08  | 2.2E+08  | - | 2023 | 2534.931 | 0        | 1.249703 | 0.256793 | 4.866571 | 4.29E-06 | 0.000119 | 0.112869 |
| ENSG0000 response | Inflamed | REP15     | protein_cc chr12 | 27849428 | 27850566 | + | 1139 | 643.5084 | 0        | 1.176201 | 0.241692 | 4.866528 | 4.29E-06 | 0.000119 | 0.112888 |
| ENSG0000 response | Inflamed | SULT1A2   | protein_cc chr16 | 28603264 | 28608430 | - | 2275 | 661.58   | 0        | 1.369341 | 0.281384 | 4.866451 | 4.30E-06 | 0.000119 | 0.112923 |
| ENSG0000 response | Inflamed | CRYBA2    | protein_cc chr2  | 2.2E+08  | 2.2E+08  | - | 1454 | 40.79952 | 0.026253 | 1.318879 | 0.271119 | 4.864579 | 4.33E-06 | 0.00012  | 0.113789 |
| ENSG0000 response | Inflamed | FAM89A    | protein_cc chr1  | 2.31E+08 | 2.31E+08 | - | 2394 | 120.9284 | 0        | -0.72888 | 0.149845 | -4.86426 | 4.33E-06 | 0.00012  | 0.113938 |
| ENSG0000 response | Inflamed | MEFV      | protein_cc chr16 | 3292028  | 3306627  | - | 4819 | 434.7088 | 0.00716  | -1.43803 | 0.295735 | -4.86257 | 4.36E-06 | 0.000121 | 0.114726 |
| ENSG0000 response | Inflamed | CTA-384D  | lincRNA chr22    | 50981079 | 50981440 | + | 362  | 22.46778 | 0.050119 | -1.10348 | 0.226966 | -4.86187 | 4.38E-06 | 0.000121 | 0.115053 |
| ENSG0000 response | Inflamed | RP11-3571 | lincRNA chr17    | 46713285 | 46724385 | - | 1596 | 1037.549 | 0        | 1.014406 | 0.208685 | 4.860941 | 4.39E-06 | 0.000121 | 0.11549  |

|                   |          |            |                  |          |          |   |       |          |          |          |          |          |          |          |          |
|-------------------|----------|------------|------------------|----------|----------|---|-------|----------|----------|----------|----------|----------|----------|----------|----------|
| ENSG0000 response | Inflamed | HMGCS2     | protein_cc chr1  | 1.2E+08  | 1.2E+08  | - | 2571  | 14553.19 | 0        | 2.234989 | 0.459828 | 4.860487 | 4.40E-06 | 0.000121 | 0.115703 |
| ENSG0000 response | Inflamed | RAB33A     | protein_cc chrX  | 1.29E+08 | 1.29E+08 | + | 1258  | 31.72315 | 0        | -0.7606  | 0.156515 | -4.85956 | 4.42E-06 | 0.000122 | 0.116139 |
| ENSG0000 response | Inflamed | GPR68      | protein_cc chr14 | 91698876 | 91720269 | - | 3278  | 506.1169 | 0        | -0.84665 | 0.174246 | -4.85896 | 4.43E-06 | 0.000122 | 0.116425 |
| ENSG0000 response | Inflamed | CD79B      | protein_cc chr17 | 62006100 | 62009714 | - | 2080  | 637.7757 | 0.002387 | -1.36685 | 0.28135  | -4.85819 | 4.44E-06 | 0.000122 | 0.116792 |
| ENSG0000 response | Inflamed | NDNL2      | protein_cc chr15 | 29560353 | 29562033 | - | 1681  | 533.315  | 0        | -0.37472 | 0.077132 | -4.85816 | 4.44E-06 | 0.000122 | 0.116806 |
| ENSG0000 response | Inflamed | MPV17      | protein_cc chr2  | 27532360 | 27548547 | - | 4653  | 1054.134 | 0        | -0.31289 | 0.064409 | -4.85777 | 4.45E-06 | 0.000122 | 0.116989 |
| ENSG0000 response | Inflamed | KIAA0125   | protein_cc chr14 | 1.06E+08 | 1.06E+08 | + | 3208  | 750.8568 | 0        | -1.30084 | 0.267856 | -4.8565  | 4.47E-06 | 0.000122 | 0.117598 |
| ENSG0000 response | Inflamed | AC073283   | lincRNA chr2     | 47419544 | 47572213 | - | 3552  | 60.63723 | 0.004773 | 0.87246  | 0.179657 | 4.85626  | 4.48E-06 | 0.000122 | 0.117713 |
| ENSG0000 response | Inflamed | BCL6       | protein_cc chr3  | 1.87E+08 | 1.87E+08 | - | 5938  | 1540.241 | 0        | -1.06893 | 0.220117 | -4.85621 | 4.48E-06 | 0.000122 | 0.117739 |
| ENSG0000 response | Inflamed | ECSCR      | protein_cc chr5  | 1.39E+08 | 1.39E+08 | - | 740   | 147.1814 | 0.002387 | -1.01091 | 0.208177 | -4.85603 | 4.48E-06 | 0.000122 | 0.117824 |
| ENSG0000 response | Inflamed | PDGFRB     | protein_cc chr5  | 1.49E+08 | 1.5E+08  | - | 7137  | 5203.661 | 0        | -1.11309 | 0.22922  | -4.85601 | 4.48E-06 | 0.000122 | 0.117833 |
| ENSG0000 response | Inflamed | NOX4       | protein_cc chr11 | 89057524 | 89322779 | - | 6327  | 18.32936 | 0.143198 | -1.24228 | 0.255852 | -4.85545 | 4.49E-06 | 0.000122 | 0.118104 |
| ENSG0000 response | Inflamed | TMEM156    | protein_cc chr4  | 38968365 | 39034542 | - | 2562  | 151.0597 | 0        | -1.04195 | 0.214598 | -4.85534 | 4.49E-06 | 0.000122 | 0.118157 |
| ENSG0000 response | Inflamed | B3GNT9     | protein_cc chr16 | 67182008 | 67185117 | - | 2917  | 632.5442 | 0        | -0.64224 | 0.132305 | -4.85429 | 4.51E-06 | 0.000123 | 0.118663 |
| ENSG0000 response | Inflamed | SH3RF3-AS1 | lincRNA chr2     | 1.1E+08  | 1.1E+08  | - | 1604  | 18.92363 | 0.0358   | -0.93746 | 0.193128 | -4.85408 | 4.52E-06 | 0.000123 | 0.118762 |
| ENSG0000 response | Inflamed | RP11-875C  | antisense chr8   | 22842109 | 22876848 | - | 2268  | 98.22196 | 0        | -0.69526 | 0.143235 | -4.85401 | 4.52E-06 | 0.000123 | 0.118797 |
| ENSG0000 response | Inflamed | RP11-561C  | pseudoger chr15  | 85798600 | 85873565 | - | 5516  | 23.40811 | 0.02148  | -1.02075 | 0.210441 | -4.85052 | 4.58E-06 | 0.000124 | 0.120499 |
| ENSG0000 response | Inflamed | SERPINB3   | protein_cc chr18 | 61322431 | 61329197 | - | 1777  | 137.5728 | 0.46778  | -2.76913 | 0.570991 | -4.84969 | 4.60E-06 | 0.000124 | 0.120907 |
| ENSG0000 response | Inflamed | NMUR2      | protein_cc chr5  | 1.52E+08 | 1.52E+08 | - | 2345  | 125.6993 | 0.257757 | -2.15654 | 0.444676 | -4.84969 | 4.60E-06 | 0.000124 | 0.120908 |
| ENSG0000 response | Inflamed | ATP8B3     | protein_cc chr19 | 1782074  | 1812275  | - | 7011  | 65.96659 | 0.004773 | -0.72131 | 0.148845 | -4.84605 | 4.67E-06 | 0.000126 | 0.12271  |
| ENSG0000 response | Inflamed | TMEM246    | protein_cc chr9  | 1.04E+08 | 1.04E+08 | - | 5568  | 1678.126 | 0        | 0.607615 | 0.125392 | 4.845738 | 4.67E-06 | 0.000126 | 0.122866 |
| ENSG0000 response | Inflamed | IGKV3D-2C  | IG_V_gene chr2   | 90077680 | 90078311 | + | 445   | 1939.644 | 0.002387 | -1.51567 | 0.312934 | -4.84341 | 4.72E-06 | 0.000127 | 0.124034 |
| ENSG0000 response | Inflamed | AC011526   | lincRNA chr19    | 41960074 | 42006559 | - | 3884  | 110.2959 | 0.002387 | -0.99478 | 0.205433 | -4.84234 | 4.74E-06 | 0.000128 | 0.124575 |
| ENSG0000 response | Inflamed | AC145676   | protein_cc chr7  | 227554   | 229557   | - | 2004  | 14.81146 | 0.243437 | -1.4477  | 0.299083 | -4.84047 | 4.77E-06 | 0.000128 | 0.125528 |
| ENSG0000 response | Inflamed | HNF1A-AS   | antisense chr12  | 1.21E+08 | 1.21E+08 | - | 1430  | 226.8401 | 0.011933 | 1.071506 | 0.221396 | 4.839778 | 4.79E-06 | 0.000129 | 0.125881 |
| ENSG0000 response | Inflamed | C3AR1      | protein_cc chr12 | 8210898  | 8219067  | - | 2145  | 639.8043 | 0        | -0.78795 | 0.162866 | -4.83802 | 4.82E-06 | 0.000129 | 0.126782 |
| ENSG0000 response | Inflamed | C11orf84   | protein_cc chr11 | 63580860 | 63595190 | + | 2807  | 558.9928 | 0        | -0.4959  | 0.102505 | -4.83781 | 4.83E-06 | 0.000129 | 0.126895 |
| ENSG0000 response | Inflamed | FOLR3      | protein_cc chr11 | 71825915 | 71850936 | + | 1394  | 27.33174 | 0.353222 | -1.36054 | 0.281327 | -4.83613 | 4.86E-06 | 0.00013  | 0.127761 |
| ENSG0000 response | Inflamed | PCK2       | protein_cc chr14 | 24563262 | 24579807 | + | 4189  | 4324.537 | 0        | 0.584631 | 0.120928 | 4.834532 | 4.89E-06 | 0.000131 | 0.128594 |
| ENSG0000 response | Inflamed | AC104699   | antisense chr2   | 25643986 | 25650512 | + | 414   | 88.66348 | 0.002387 | -1.14378 | 0.236594 | -4.83436 | 4.89E-06 | 0.000131 | 0.128685 |
| ENSG0000 response | Inflamed | SCIMP      | protein_cc chr17 | 5112256  | 5138155  | - | 4208  | 459.9427 | 0        | -0.72092 | 0.14913  | -4.83419 | 4.90E-06 | 0.000131 | 0.128773 |
| ENSG0000 response | Inflamed | RP5-875H1  | antisense chr17  | 48178068 | 48179284 | - | 430   | 7.866348 | 0.334129 | 0.926257 | 0.19161  | 4.834074 | 4.90E-06 | 0.000131 | 0.128834 |
| ENSG0000 response | Inflamed | TTPA       | protein_cc chr8  | 63961112 | 63998612 | - | 2389  | 96.29117 | 0.02148  | 1.226455 | 0.253732 | 4.833664 | 4.91E-06 | 0.000131 | 0.129049 |
| ENSG0000 response | Inflamed | WDFY4      | protein_cc chr10 | 49892921 | 50191001 | + | 13692 | 1690.284 | 0        | -0.98618 | 0.204035 | -4.83338 | 4.91E-06 | 0.000131 | 0.129196 |
| ENSG0000 response | Inflamed | CELA3B     | protein_cc chr1  | 22303514 | 22325135 | + | 1541  | 13.51313 | 0.341289 | 1.007068 | 0.208405 | 4.832255 | 4.94E-06 | 0.000131 | 0.12979  |
| ENSG0000 response | Inflamed | IGLV9-49   | IG_V_gene chr22  | 22697539 | 22698084 | + | 409   | 434.5394 | 0.004773 | -1.61349 | 0.333903 | -4.83222 | 4.94E-06 | 0.000131 | 0.129809 |
| ENSG0000 response | Inflamed | ULBP1      | protein_cc chr6  | 1.5E+08  | 1.5E+08  | + | 3142  | 2.844869 | 0.412888 | -0.73057 | 0.151234 | -4.8307  | 4.97E-06 | 0.000132 | 0.130613 |
| ENSG0000 response | Inflamed | LSP1       | protein_cc chr11 | 1874200  | 1913497  | + | 5399  | 4886.85  | 0        | -0.71475 | 0.147961 | -4.83062 | 4.97E-06 | 0.000132 | 0.130656 |
| ENSG0000 response | Inflamed | CCDC108    | protein_cc chr2  | 2.2E+08  | 2.2E+08  | - | 10519 | 18.65632 | 0.02864  | 1.01034  | 0.209155 | 4.83058  | 4.97E-06 | 0.000132 | 0.130676 |
| ENSG0000 response | Inflamed | IGKV2-40   | IG_V_gene chr2   | 89629873 | 89630186 | - | 314   | 47.07399 | 0.109785 | -1.65012 | 0.341683 | -4.82938 | 4.99E-06 | 0.000132 | 0.131316 |

|                   |          |           |                  |          |          |   |       |          |          |          |          |          |          |          |          |
|-------------------|----------|-----------|------------------|----------|----------|---|-------|----------|----------|----------|----------|----------|----------|----------|----------|
| ENSG0000 response | Inflamed | KLHL6     | protein_cc chr3  | 1.83E+08 | 1.83E+08 | - | 10546 | 1778.94  | 0        | -1.10754 | 0.229415 | -4.82764 | 5.03E-06 | 0.000133 | 0.132243 |
| ENSG0000 response | Inflamed | LA16c-395 | antisense chr16  | 1630528  | 1660329  | + | 485   | 8.916468 | 0.190931 | 0.97089  | 0.201114 | 4.827549 | 5.03E-06 | 0.000133 | 0.132295 |
| ENSG0000 response | Inflamed | EPN3      | protein_cc chr17 | 48609904 | 48621111 | + | 4642  | 1389.728 | 0.004773 | 1.172565 | 0.242908 | 4.827191 | 5.04E-06 | 0.000133 | 0.132487 |
| ENSG0000 response | Inflamed | APOBEC3I  | protein_cc chr22 | 39493229 | 39500072 | + | 1251  | 23.50119 | 0.011933 | -0.76995 | 0.159521 | -4.82662 | 5.05E-06 | 0.000133 | 0.132796 |
| ENSG0000 response | Inflamed | C4orf50   | protein_cc chr4  | 5958845  | 5991545  | - | 4557  | 12.61337 | 0.286396 | -1.31188 | 0.27186  | -4.82556 | 5.07E-06 | 0.000134 | 0.133367 |
| ENSG0000 response | Inflamed | CMTM3     | protein_cc chr16 | 66637777 | 66647795 | + | 3163  | 967.5203 | 0        | -0.61773 | 0.128053 | -4.82404 | 5.10E-06 | 0.000134 | 0.134195 |
| ENSG0000 response | Inflamed | IGKV1-33  | IG_V_gene chr2   | 89567758 | 89568263 | - | 382   | 371.1146 | 0.002387 | -1.47803 | 0.306407 | -4.82375 | 5.11E-06 | 0.000134 | 0.134353 |
| ENSG0000 response | Inflamed | TTC38     | protein_cc chr22 | 46663858 | 46689905 | + | 3578  | 4836.986 | 0        | 0.545115 | 0.113039 | 4.822377 | 5.14E-06 | 0.000135 | 0.135101 |
| ENSG0000 response | Inflamed | BLVRA     | protein_cc chr7  | 43798279 | 43846939 | + | 1819  | 413.5298 | 0        | -0.65063 | 0.134925 | -4.82217 | 5.14E-06 | 0.000135 | 0.135213 |
| ENSG0000 response | Inflamed | D87024.1  | miRNA chr22      | 23198720 | 23198813 | + | 94    | 33.58473 | 0.031026 | -1.11923 | 0.232254 | -4.81899 | 5.21E-06 | 0.000137 | 0.136969 |
| ENSG0000 response | Inflamed | SHC3      | protein_cc chr9  | 91628060 | 91793682 | - | 2555  | 45.21718 | 0.033413 | -1.50998 | 0.313376 | -4.81842 | 5.22E-06 | 0.000137 | 0.137285 |
| ENSG0000 response | Inflamed | CLCN2     | protein_cc chr3  | 1.84E+08 | 1.84E+08 | - | 4290  | 2626.348 | 0        | 1.008125 | 0.209294 | 4.816786 | 5.26E-06 | 0.000137 | 0.138201 |
| ENSG0000 response | Inflamed | ZG16      | protein_cc chr16 | 29789561 | 29793096 | + | 1934  | 30948.41 | 0        | 2.32467  | 0.482637 | 4.816603 | 5.26E-06 | 0.000137 | 0.138303 |
| ENSG0000 response | Inflamed | ABHD11    | protein_cc chr7  | 73150424 | 73153197 | - | 2289  | 1752.198 | 0        | 0.508949 | 0.105679 | 4.81598  | 5.27E-06 | 0.000138 | 0.138653 |
| ENSG0000 response | Inflamed | DNAH5     | protein_cc chr5  | 13690440 | 13944652 | - | 16475 | 32.81862 | 0.038186 | -1.15722 | 0.240328 | -4.81514 | 5.29E-06 | 0.000138 | 0.139127 |
| ENSG0000 response | Inflamed | SERPINB7  | protein_cc chr18 | 61420169 | 61472604 | + | 2596  | 468.926  | 0.281623 | -2.96381 | 0.615591 | -4.81458 | 5.30E-06 | 0.000138 | 0.139443 |
| ENSG0000 response | Inflamed | MROH7     | protein_cc chr1  | 55107463 | 55175939 | + | 9052  | 82.13126 | 0.026253 | 1.315139 | 0.273192 | 4.813968 | 5.32E-06 | 0.000138 | 0.139789 |
| ENSG0000 response | Inflamed | LY6E      | protein_cc chr8  | 1.44E+08 | 1.44E+08 | + | 2640  | 1887.2   | 0        | -0.83946 | 0.174387 | -4.81379 | 5.32E-06 | 0.000138 | 0.139889 |
| ENSG0000 response | Inflamed | SOCS3     | protein_cc chr17 | 76352864 | 76356158 | - | 2729  | 6163.48  | 0        | -1.5003  | 0.311699 | -4.81331 | 5.33E-06 | 0.000139 | 0.140164 |
| ENSG0000 response | Inflamed | CYP2J2    | protein_cc chr1  | 60358980 | 60392462 | - | 2990  | 1116.943 | 0        | 0.964793 | 0.200467 | 4.812728 | 5.34E-06 | 0.000139 | 0.140494 |
| ENSG0000 response | Inflamed | CREB3L4   | protein_cc chr1  | 1.54E+08 | 1.54E+08 | + | 2911  | 586.5728 | 0        | 0.532571 | 0.110675 | 4.812014 | 5.36E-06 | 0.000139 | 0.140901 |
| ENSG0000 response | Inflamed | CECR1     | protein_cc chr22 | 17660194 | 17702879 | - | 5136  | 6169.15  | 0        | -0.87478 | 0.181851 | -4.81041 | 5.39E-06 | 0.00014  | 0.141818 |
| ENSG0000 response | Inflamed | DNAAF1    | protein_cc chr16 | 84178865 | 84212373 | + | 5939  | 22.34368 | 0.198091 | -1.40065 | 0.291417 | -4.80635 | 5.48E-06 | 0.000142 | 0.144172 |
| ENSG0000 response | Inflamed | FAM211A   | protein_cc chr17 | 16344891 | 16395467 | - | 3695  | 1882.995 | 0        | 0.855193 | 0.177948 | 4.805845 | 5.50E-06 | 0.000142 | 0.144467 |
| ENSG0000 response | Inflamed | IGKV3-7   | IG_V_gene chr2   | 89277987 | 89278600 | - | 445   | 34.50597 | 0.047733 | -1.313   | 0.273319 | -4.80391 | 5.54E-06 | 0.000143 | 0.145606 |
| ENSG0000 response | Inflamed | AC002480  | sense_ove chr7   | 22611226 | 22701411 | - | 1282  | 10.22434 | 0.291169 | -1.12471 | 0.234178 | -4.8028  | 5.56E-06 | 0.000144 | 0.146262 |
| ENSG0000 response | Inflamed | RP11-395C | pseudoger chr5   | 1.26E+08 | 1.26E+08 | - | 303   | 7.701671 | 0.23389  | 0.879384 | 0.183112 | 4.80244  | 5.57E-06 | 0.000144 | 0.146474 |
| ENSG0000 response | Inflamed | LZTS1     | protein_cc chr8  | 20103676 | 20161474 | - | 5706  | 217.5179 | 0.01432  | -1.20188 | 0.250335 | -4.80111 | 5.60E-06 | 0.000144 | 0.147267 |
| ENSG0000 response | Inflamed | C21orf88  | protein_cc chr21 | 40969074 | 40984748 | - | 2516  | 230.5346 | 0.031026 | 2.218215 | 0.462097 | 4.800329 | 5.62E-06 | 0.000144 | 0.147731 |
| ENSG0000 response | Inflamed | ARSB      | protein_cc chr5  | 78073032 | 78281910 | - | 7189  | 925.5609 | 0        | -0.48141 | 0.100288 | -4.80024 | 5.62E-06 | 0.000144 | 0.147783 |
| ENSG0000 response | Inflamed | C11orf21  | protein_cc chr11 | 2316875  | 2324279  | - | 4199  | 151.1551 | 0.002387 | -1.05261 | 0.219302 | -4.79981 | 5.63E-06 | 0.000144 | 0.148043 |
| ENSG0000 response | Inflamed | HDAC7     | protein_cc chr12 | 48176505 | 48226915 | - | 9936  | 3417.296 | 0        | -0.73263 | 0.152637 | -4.79981 | 5.63E-06 | 0.000144 | 0.148043 |
| ENSG0000 response | Inflamed | FAM78A    | protein_cc chr9  | 1.34E+08 | 1.34E+08 | - | 5499  | 1000.589 | 0        | -0.76934 | 0.160291 | -4.79962 | 5.64E-06 | 0.000144 | 0.148154 |
| ENSG0000 response | Inflamed | FBXO2     | protein_cc chr1  | 11708424 | 11715842 | - | 2333  | 74.20048 | 0        | -1.04045 | 0.216864 | -4.79769 | 5.68E-06 | 0.000145 | 0.149316 |
| ENSG0000 response | Inflamed | TNFSF8    | protein_cc chr9  | 1.18E+08 | 1.18E+08 | - | 2348  | 124.7733 | 0.004773 | -1.09654 | 0.228561 | -4.79757 | 5.68E-06 | 0.000145 | 0.14939  |
| ENSG0000 response | Inflamed | FOXA3     | protein_cc chr19 | 46367247 | 46377055 | + | 2192  | 1939.196 | 0        | 0.849354 | 0.177105 | 4.795762 | 5.72E-06 | 0.000146 | 0.150486 |
| ENSG0000 response | Inflamed | ORM1      | protein_cc chr9  | 1.17E+08 | 1.17E+08 | + | 1532  | 7.677804 | 0.568019 | -1.30244 | 0.271624 | -4.79501 | 5.74E-06 | 0.000147 | 0.150945 |
| ENSG0000 response | Inflamed | LINC00528 | lincRNA chr22    | 18260088 | 18262247 | + | 2160  | 78.65155 | 0.00716  | -1.01473 | 0.211644 | -4.79452 | 5.75E-06 | 0.000147 | 0.151246 |
| ENSG0000 response | Inflamed | MB21D1    | protein_cc chr6  | 74123238 | 74161999 | - | 4155  | 304.0692 | 0.002387 | -0.72579 | 0.151438 | -4.79267 | 5.80E-06 | 0.000147 | 0.152378 |
| ENSG0000 response | Inflamed | RPH3A     | protein_cc chr12 | 1.13E+08 | 1.13E+08 | + | 10381 | 10.57518 | 0.119332 | -1.06017 | 0.221216 | -4.79247 | 5.80E-06 | 0.000147 | 0.152502 |

|                   |          |           |                  |          |          |   |       |          |          |          |          |          |          |          |          |
|-------------------|----------|-----------|------------------|----------|----------|---|-------|----------|----------|----------|----------|----------|----------|----------|----------|
| ENSG0000 response | Inflamed | PODNL1    | protein_cc chr19 | 14042000 | 14064204 | - | 4168  | 190.3508 | 0        | -0.78399 | 0.163591 | -4.79238 | 5.80E-06 | 0.000147 | 0.15256  |
| ENSG0000 response | Inflamed | CLEC4A    | protein_cc chr12 | 8276228  | 8291203  | + | 1281  | 166.3365 | 0        | -0.88637 | 0.184956 | -4.79235 | 5.80E-06 | 0.000147 | 0.15258  |
| ENSG0000 response | Inflamed | FAM87B    | lincRNA chr1     | 752751   | 755214   | + | 1944  | 2.066826 | 0.477327 | -0.60198 | 0.125619 | -4.7921  | 5.81E-06 | 0.000147 | 0.152734 |
| ENSG0000 response | Inflamed | IGLV3-16  | IG_V_gene chr22  | 23089870 | 23090398 | + | 375   | 123.5752 | 0.009547 | -1.42412 | 0.297208 | -4.79165 | 5.82E-06 | 0.000148 | 0.153011 |
| ENSG0000 response | Inflamed | IGLL5     | protein_cc chr22 | 23229960 | 23238287 | + | 1335  | 1057.413 | 0        | -1.22609 | 0.255909 | -4.79112 | 5.83E-06 | 0.000148 | 0.153339 |
| ENSG0000 response | Inflamed | ITGA5     | protein_cc chr12 | 54789045 | 54813244 | - | 7577  | 4737.473 | 0        | -1.15973 | 0.242097 | -4.79036 | 5.85E-06 | 0.000148 | 0.153812 |
| ENSG0000 response | Inflamed | ELMO1     | protein_cc chr7  | 36893961 | 37488852 | - | 9767  | 1060.496 | 0        | -0.81628 | 0.170415 | -4.78999 | 5.86E-06 | 0.000148 | 0.154043 |
| ENSG0000 response | Inflamed | RP11-879F | lincRNA chr18    | 59252979 | 59274149 | - | 1199  | 3.171838 | 0.384248 | -0.73678 | 0.153841 | -4.78922 | 5.88E-06 | 0.000148 | 0.15452  |
| ENSG0000 response | Inflamed | SLC6A6    | protein_cc chr3  | 14444076 | 14530857 | + | 8262  | 2895.967 | 0        | -0.9375  | 0.195777 | -4.78862 | 5.89E-06 | 0.000149 | 0.154896 |
| ENSG0000 response | Inflamed | COL4A1    | protein_cc chr13 | 1.11E+08 | 1.11E+08 | - | 7877  | 16555.38 | 0        | -1.16518 | 0.243345 | -4.78819 | 5.90E-06 | 0.000149 | 0.155163 |
| ENSG0000 response | Inflamed | PDE6A     | protein_cc chr5  | 1.49E+08 | 1.49E+08 | - | 7414  | 165.7232 | 0.083532 | 1.779466 | 0.37175  | 4.786722 | 5.94E-06 | 0.00015  | 0.15609  |
| ENSG0000 response | Inflamed | SHBG      | protein_cc chr17 | 7517382  | 7536700  | + | 1812  | 10.3389  | 0.057279 | -0.72914 | 0.152343 | -4.78617 | 5.95E-06 | 0.00015  | 0.156441 |
| ENSG0000 response | Inflamed | IGLV1-41  | IG_V_pseu chr22  | 22758539 | 22759053 | + | 406   | 103.642  | 0.064439 | -1.37611 | 0.287524 | -4.78606 | 5.95E-06 | 0.00015  | 0.156505 |
| ENSG0000 response | Inflamed | LUCAT1    | lincRNA chr5     | 90598846 | 90610219 | - | 2904  | 88.7685  | 0.176611 | -1.95411 | 0.408473 | -4.78395 | 6.00E-06 | 0.000151 | 0.157848 |
| ENSG0000 response | Inflamed | RP4-647J2 | sense_ove chr7   | 44998598 | 45000508 | - | 1911  | 72.74224 | 0.016706 | -1.07271 | 0.22427  | -4.78312 | 6.02E-06 | 0.000151 | 0.158379 |
| ENSG0000 response | Inflamed | SCPEP1    | protein_cc chr17 | 55055466 | 55084129 | + | 3853  | 1439.403 | 0        | -0.49562 | 0.103639 | -4.78215 | 6.05E-06 | 0.000152 | 0.159003 |
| ENSG0000 response | Inflamed | CD37      | protein_cc chr19 | 49838428 | 49846592 | + | 4161  | 1854.384 | 0        | -1.00594 | 0.210359 | -4.78203 | 6.05E-06 | 0.000152 | 0.159079 |
| ENSG0000 response | Inflamed | APOBEC3C  | protein_cc chr22 | 39410088 | 39416357 | + | 2818  | 1847.406 | 0        | -0.57341 | 0.119935 | -4.78099 | 6.08E-06 | 0.000152 | 0.159745 |
| ENSG0000 response | Inflamed | RN7SKP12  | misc_RNA chr16   | 29742372 | 29742725 | - | 354   | 26.67064 | 0.27685  | 1.313566 | 0.274764 | 4.780704 | 6.08E-06 | 0.000152 | 0.159931 |
| ENSG0000 response | Inflamed | GALNT12   | protein_cc chr9  | 1.02E+08 | 1.02E+08 | + | 2824  | 3677.613 | 0        | 1.01883  | 0.213128 | 4.780376 | 6.09E-06 | 0.000152 | 0.160143 |
| ENSG0000 response | Inflamed | RP1-29C1  | sense_intr chr22 | 49965912 | 49969074 | - | 2379  | 15.58234 | 0.076372 | -0.89235 | 0.186695 | -4.77971 | 6.11E-06 | 0.000152 | 0.160574 |
| ENSG0000 response | Inflamed | SAMD13    | protein_cc chr1  | 84764049 | 84855640 | + | 3589  | 173.5752 | 0.002387 | 0.935563 | 0.195801 | 4.77813  | 6.15E-06 | 0.000153 | 0.161602 |
| ENSG0000 response | Inflamed | GRB7      | protein_cc chr17 | 37894180 | 37903544 | + | 3597  | 762.7733 | 0        | 0.780312 | 0.163316 | 4.777937 | 6.15E-06 | 0.000153 | 0.161728 |
| ENSG0000 response | Inflamed | MSN       | protein_cc chrX  | 64808257 | 64961791 | + | 5969  | 13315.18 | 0        | -0.83185 | 0.174151 | -4.77663 | 6.18E-06 | 0.000154 | 0.162586 |
| ENSG0000 response | Inflamed | ANKH      | protein_cc chr5  | 14704910 | 14871887 | - | 10868 | 3722.637 | 0        | 0.430651 | 0.09016  | 4.776502 | 6.19E-06 | 0.000154 | 0.162668 |
| ENSG0000 response | Inflamed | ALOX5AP   | protein_cc chr13 | 31309645 | 31338556 | + | 1344  | 519.6754 | 0        | -0.86458 | 0.18101  | -4.77641 | 6.19E-06 | 0.000154 | 0.16273  |
| ENSG0000 response | Inflamed | ENTPD5    | protein_cc chr14 | 74424713 | 74486102 | - | 10379 | 7916.606 | 0        | 1.084278 | 0.227072 | 4.775043 | 6.22E-06 | 0.000154 | 0.163629 |
| ENSG0000 response | Inflamed | ZDHHC3    | protein_cc chr3  | 44956749 | 45017677 | - | 7609  | 7289.623 | 0        | 0.328224 | 0.068749 | 4.774214 | 6.24E-06 | 0.000155 | 0.164177 |
| ENSG0000 response | Inflamed | NXPE3     | protein_cc chr3  | 1.01E+08 | 1.02E+08 | + | 9474  | 807.2625 | 0        | -0.98732 | 0.206857 | -4.77297 | 6.28E-06 | 0.000155 | 0.165003 |
| ENSG0000 response | Inflamed | ANO2      | protein_cc chr12 | 5641035  | 6055398  | - | 6012  | 37.40334 | 0.002387 | -0.73121 | 0.153211 | -4.7726  | 6.29E-06 | 0.000155 | 0.165253 |
| ENSG0000 response | Inflamed | GPR141    | protein_cc chr7  | 37723399 | 37873390 | + | 2312  | 42.99523 | 0.009547 | -0.82255 | 0.172355 | -4.77243 | 6.29E-06 | 0.000155 | 0.165362 |
| ENSG0000 response | Inflamed | ARRB2     | protein_cc chr17 | 4613784  | 4624794  | + | 4372  | 2456.453 | 0        | -0.5738  | 0.120243 | -4.77201 | 6.30E-06 | 0.000156 | 0.165647 |
| ENSG0000 response | Inflamed | FYN       | protein_cc chr6  | 1.12E+08 | 1.12E+08 | - | 7411  | 1495.057 | 0        | -0.7793  | 0.163327 | -4.77141 | 6.32E-06 | 0.000156 | 0.166043 |
| ENSG0000 response | Inflamed | PDE1B     | protein_cc chr12 | 54943134 | 54973023 | + | 7457  | 251.7017 | 0        | -0.78619 | 0.164784 | -4.77103 | 6.33E-06 | 0.000156 | 0.166301 |
| ENSG0000 response | Inflamed | SLC41A1   | protein_cc chr1  | 2.06E+08 | 2.06E+08 | - | 6357  | 1071.024 | 0        | -0.72353 | 0.151667 | -4.77049 | 6.34E-06 | 0.000156 | 0.166661 |
| ENSG0000 response | Inflamed | GNGT2     | protein_cc chr17 | 47280153 | 47287936 | - | 1689  | 97.24821 | 0        | -0.5494  | 0.115172 | -4.77031 | 6.34E-06 | 0.000156 | 0.166784 |
| ENSG0000 response | Inflamed | ARG1      | protein_cc chr6  | 1.32E+08 | 1.32E+08 | + | 1965  | 6.293556 | 0.570406 | -1.21907 | 0.25563  | -4.76889 | 6.38E-06 | 0.000157 | 0.167743 |
| ENSG0000 response | Inflamed | RP11-536C | lincRNA chr9     | 13406379 | 13433052 | - | 2576  | 43.92363 | 0.081146 | -1.28378 | 0.269298 | -4.76713 | 6.43E-06 | 0.000158 | 0.168939 |
| ENSG0000 response | Inflamed | APOBEC3A  | protein_cc chr22 | 39348746 | 39359188 | + | 2010  | 296.2936 | 0.004773 | -1.93854 | 0.406658 | -4.76699 | 6.43E-06 | 0.000158 | 0.169031 |
| ENSG0000 response | Inflamed | PARVG     | protein_cc chr22 | 44568836 | 44615413 | + | 8677  | 1116.136 | 0        | -0.78474 | 0.16463  | -4.76666 | 6.44E-06 | 0.000158 | 0.169257 |

|                   |          |           |                  |          |            |       |          |          |          |          |          |          |          |          |
|-------------------|----------|-----------|------------------|----------|------------|-------|----------|----------|----------|----------|----------|----------|----------|----------|
| ENSG0000 response | Inflamed | DOCK2     | protein_cc chr5  | 1.69E+08 | 1.7E+08 +  | 12816 | 2147.623 | 0        | -0.82931 | 0.174101 | -4.76336 | 6.52E-06 | 0.00016  | 0.171521 |
| ENSG0000 response | Inflamed | RP11-126C | antisense chr17  | 202429   | 207372 +   | 748   | 41.83771 | 0.016706 | 0.943855 | 0.198188 | 4.762413 | 6.55E-06 | 0.00016  | 0.172181 |
| ENSG0000 response | Inflamed | RP11-63N1 | antisense chr1   | 21912965 | 21917680 + | 821   | 1.319809 | 0.747017 | -0.66516 | 0.139762 | -4.75924 | 6.63E-06 | 0.000162 | 0.174397 |
| ENSG0000 response | Inflamed | EFCAB4B   | protein_cc chr12 | 3715799  | 3873985 -  | 12466 | 1770.432 | 0        | 0.836975 | 0.175977 | 4.756168 | 6.72E-06 | 0.000164 | 0.176568 |
| ENSG0000 response | Inflamed | CERS4     | protein_cc chr19 | 8271620  | 8327305 +  | 4059  | 351.4654 | 0        | -0.69384 | 0.145916 | -4.75507 | 6.75E-06 | 0.000165 | 0.177351 |
| ENSG0000 response | Inflamed | MIR223    | miRNA chrX       | 65238712 | 65238821 + | 110   | 11.34368 | 0.178998 | -1.1518  | 0.242262 | -4.75437 | 6.76E-06 | 0.000165 | 0.177847 |
| ENSG0000 response | Inflamed | WNT5A-AS  | antisense chr3   | 55521727 | 55522336 + | 500   | 2.642005 | 0.479714 | -0.74628 | 0.156966 | -4.75437 | 6.76E-06 | 0.000165 | 0.177849 |
| ENSG0000 response | Inflamed | IGLV1-50  | IG_V_gene chr22  | 22681658 | 22682172 + | 405   | 23.31026 | 0.038186 | -1.25146 | 0.263238 | -4.75409 | 6.77E-06 | 0.000165 | 0.17805  |
| ENSG0000 response | Inflamed | INHBB     | protein_cc chr2  | 1.21E+08 | 1.21E+08 + | 3204  | 133.494  | 0.016706 | -1.09543 | 0.230434 | -4.75377 | 6.78E-06 | 0.000165 | 0.178281 |
| ENSG0000 response | Inflamed | CLEC14A   | protein_cc chr14 | 38723308 | 38725574 - | 2267  | 649.0573 | 0        | -0.94084 | 0.197943 | -4.75308 | 6.80E-06 | 0.000165 | 0.178776 |
| ENSG0000 response | Inflamed | NRP2      | protein_cc chr2  | 2.07E+08 | 2.07E+08 + | 11380 | 996.1456 | 0        | -0.98454 | 0.207204 | -4.75153 | 6.84E-06 | 0.000166 | 0.179894 |
| ENSG0000 response | Inflamed | ADAMTS1   | protein_cc chr5  | 33523640 | 33892297 - | 9778  | 399.852  | 0        | -1.31163 | 0.276062 | -4.75123 | 6.85E-06 | 0.000166 | 0.180113 |
| ENSG0000 response | Inflamed | SPON2     | protein_cc chr4  | 1160720  | 1202750 -  | 6013  | 2675.365 | 0        | -0.85925 | 0.180912 | -4.74956 | 6.90E-06 | 0.000167 | 0.181325 |
| ENSG0000 response | Inflamed | LYN       | protein_cc chr8  | 56792372 | 56923940 + | 3398  | 3092.625 | 0        | -0.80897 | 0.170386 | -4.74787 | 6.94E-06 | 0.000168 | 0.182569 |
| ENSG0000 response | Inflamed | CD7       | protein_cc chr17 | 80272744 | 80275478 - | 2735  | 843.6874 | 0        | -0.69048 | 0.145433 | -4.74775 | 6.95E-06 | 0.000168 | 0.182655 |
| ENSG0000 response | Inflamed | DARC      | protein_cc chr1  | 1.59E+08 | 1.59E+08 + | 1954  | 942.7637 | 0        | -1.15399 | 0.243079 | -4.74741 | 6.96E-06 | 0.000168 | 0.182902 |
| ENSG0000 response | Inflamed | FGFR3     | protein_cc chr4  | 1795034  | 1810599 +  | 4834  | 1824.064 | 0        | 0.896821 | 0.188947 | 4.746415 | 6.99E-06 | 0.000168 | 0.183637 |
| ENSG0000 response | Inflamed | IL1RN     | protein_cc chr2  | 1.14E+08 | 1.14E+08 + | 3256  | 3354.305 | 0        | -1.42199 | 0.299647 | -4.74555 | 7.01E-06 | 0.000169 | 0.18428  |
| ENSG0000 response | Inflamed | EPHX3     | protein_cc chr19 | 15337730 | 15344246 - | 2034  | 44.76134 | 0        | -1.00534 | 0.211967 | -4.74288 | 7.08E-06 | 0.000171 | 0.186264 |
| ENSG0000 response | Inflamed | HCN2      | protein_cc chr19 | 589893   | 617159 +   | 3408  | 37.41289 | 0.016706 | -0.83747 | 0.176619 | -4.74168 | 7.12E-06 | 0.000171 | 0.187164 |
| ENSG0000 response | Inflamed | AL592528  | antisense chr21  | 47247875 | 47256333 - | 3466  | 2.064439 | 0.649165 | -0.81455 | 0.171856 | -4.73973 | 7.18E-06 | 0.000172 | 0.188644 |
| ENSG0000 response | Inflamed | MT1G      | protein_cc chr16 | 56700643 | 56701977 - | 750   | 2189.334 | 0        | 1.357728 | 0.286608 | 4.737231 | 7.25E-06 | 0.000174 | 0.190544 |
| ENSG0000 response | Inflamed | TPST1     | protein_cc chr7  | 65670186 | 65885530 + | 2871  | 262.2888 | 0        | -0.86603 | 0.182821 | -4.73702 | 7.25E-06 | 0.000174 | 0.190709 |
| ENSG0000 response | Inflamed | DNPEP     | protein_cc chr2  | 2.2E+08  | 2.2E+08 -  | 4734  | 3173.232 | 0        | 0.243832 | 0.051482 | 4.736257 | 7.28E-06 | 0.000174 | 0.191292 |
| ENSG0000 response | Inflamed | AIFM3     | protein_cc chr22 | 21319396 | 21335649 + | 5332  | 1813.604 | 0        | 1.205739 | 0.254609 | 4.735655 | 7.29E-06 | 0.000175 | 0.191755 |
| ENSG0000 response | Inflamed | RUNX3     | protein_cc chr1  | 25226002 | 25291612 - | 4605  | 1614.346 | 0        | -0.75405 | 0.159249 | -4.73505 | 7.31E-06 | 0.000175 | 0.192218 |
| ENSG0000 response | Inflamed | CXCL17    | protein_cc chr19 | 42932440 | 42947200 - | 1189  | 26.36277 | 0.336516 | -1.70538 | 0.360169 | -4.73494 | 7.31E-06 | 0.000175 | 0.192309 |
| ENSG0000 response | Inflamed | RP11-595E | protein_cc chr18 | 19668021 | 19678741 + | 453   | 6.307876 | 0.167064 | 0.773355 | 0.163391 | 4.733142 | 7.37E-06 | 0.000176 | 0.193701 |
| ENSG0000 response | Inflamed | PHYH      | protein_cc chr10 | 13319796 | 13344412 - | 3381  | 1220.198 | 0        | 0.522633 | 0.110425 | 4.732926 | 7.37E-06 | 0.000176 | 0.193869 |
| ENSG0000 response | Inflamed | FLOT1     | protein_cc chr6  | 30695486 | 30710510 - | 3186  | 5117.547 | 0        | -0.28611 | 0.060466 | -4.73182 | 7.41E-06 | 0.000177 | 0.19473  |
| ENSG0000 response | Inflamed | SLC17A8   | protein_cc chr12 | 1.01E+08 | 1.01E+08 + | 4272  | 43.3747  | 0.126492 | 1.381015 | 0.291991 | 4.729645 | 7.47E-06 | 0.000178 | 0.19644  |
| ENSG0000 response | Inflamed | HTRA1     | protein_cc chr10 | 1.24E+08 | 1.24E+08 + | 2120  | 1613.315 | 0        | -0.90012 | 0.190331 | -4.72923 | 7.48E-06 | 0.000178 | 0.196771 |
| ENSG0000 response | Inflamed | MGP       | protein_cc chr12 | 15034115 | 15038860 - | 2639  | 891.2745 | 0        | -1.1842  | 0.25042  | -4.72886 | 7.50E-06 | 0.000178 | 0.197056 |
| ENSG0000 response | Inflamed | HIVEP3    | protein_cc chr1  | 41972036 | 42501596 - | 14224 | 796.8449 | 0        | -0.73934 | 0.156391 | -4.72749 | 7.54E-06 | 0.000179 | 0.198151 |
| ENSG0000 response | Inflamed | SLC25A23  | protein_cc chr19 | 6436090  | 6465214 -  | 4859  | 6772.198 | 0        | 0.687038 | 0.14535  | 4.726799 | 7.56E-06 | 0.000179 | 0.198697 |
| ENSG0000 response | Inflamed | RP11-23J1 | pseudoger chr12  | 47529281 | 47532153 - | 603   | 8.875895 | 0.088305 | -0.78694 | 0.166503 | -4.72628 | 7.57E-06 | 0.00018  | 0.199114 |
| ENSG0000 response | Inflamed | THBS2     | protein_cc chr6  | 1.7E+08  | 1.7E+08 -  | 6397  | 1202.045 | 0.002387 | -1.81829 | 0.384745 | -4.72595 | 7.58E-06 | 0.00018  | 0.199378 |
| ENSG0000 response | Inflamed | CCDC102A  | protein_cc chr16 | 57546090 | 57570511 - | 2582  | 262.6301 | 0        | -0.85309 | 0.180603 | -4.72359 | 7.66E-06 | 0.000181 | 0.201274 |
| ENSG0000 response | Inflamed | BEST2     | protein_cc chr19 | 12862516 | 12869272 + | 2646  | 1466.463 | 0.011933 | 2.230021 | 0.472174 | 4.722879 | 7.68E-06 | 0.000182 | 0.201847 |
| ENSG0000 response | Inflamed | DYRK3     | protein_cc chr1  | 2.07E+08 | 2.07E+08 + | 4218  | 108.642  | 0.002387 | -0.86954 | 0.184123 | -4.7226  | 7.69E-06 | 0.000182 | 0.202074 |

|                   |          |           |                  |          |          |   |       |          |          |          |          |          |          |          |          |
|-------------------|----------|-----------|------------------|----------|----------|---|-------|----------|----------|----------|----------|----------|----------|----------|----------|
| ENSG0000 response | Inflamed | GPX7      | protein_cc chr1  | 53068044 | 53074723 | + | 1691  | 214.8568 | 0        | -0.82735 | 0.175217 | -4.72185 | 7.71E-06 | 0.000182 | 0.202684 |
| ENSG0000 response | Inflamed | CTD-2132f | sense_intr chr17 | 40190250 | 40190752 | - | 503   | 10.84248 | 0.064439 | 0.694576 | 0.147105 | 4.721621 | 7.72E-06 | 0.000182 | 0.202868 |
| ENSG0000 response | Inflamed | COBL      | protein_cc chr7  | 51083909 | 51384515 | - | 14304 | 2722.737 | 0        | 0.836569 | 0.177182 | 4.721531 | 7.72E-06 | 0.000182 | 0.202942 |
| ENSG0000 response | Inflamed | TRABD2A   | protein_cc chr2  | 85048774 | 85134132 | - | 8771  | 2907.926 | 0        | 1.002198 | 0.212389 | 4.718701 | 7.81E-06 | 0.000184 | 0.205258 |
| ENSG0000 response | Inflamed | TWIST2    | protein_cc chr2  | 2.4E+08  | 2.4E+08  | + | 1176  | 84.82816 | 0.004773 | -1.26065 | 0.267164 | -4.71863 | 7.81E-06 | 0.000184 | 0.20532  |
| ENSG0000 response | Inflamed | LAYN      | protein_cc chr11 | 1.11E+08 | 1.11E+08 | + | 2938  | 153.1002 | 0        | -0.70484 | 0.149393 | -4.71805 | 7.83E-06 | 0.000184 | 0.205797 |
| ENSG0000 response | Inflamed | AC110619  | pseudoger chr2   | 2.41E+08 | 2.41E+08 | - | 1667  | 11.68496 | 0.212411 | 1.088292 | 0.230715 | 4.717046 | 7.86E-06 | 0.000184 | 0.206625 |
| ENSG0000 response | Inflamed | TSPAN15   | protein_cc chr10 | 71211229 | 71267425 | + | 2646  | 4009.695 | 0        | 0.414687 | 0.087939 | 4.715599 | 7.91E-06 | 0.000185 | 0.207826 |
| ENSG0000 response | Inflamed | AC072052  | pseudoger chr7   | 6530424  | 6530729  | - | 306   | 5.947494 | 0.212411 | 0.752108 | 0.159497 | 4.715504 | 7.91E-06 | 0.000185 | 0.207906 |
| ENSG0000 response | Inflamed | SIGLEC5   | protein_cc chr19 | 52114781 | 52150151 | - | 3319  | 41.52983 | 0.038186 | -1.33661 | 0.283508 | -4.71455 | 7.94E-06 | 0.000186 | 0.208704 |
| ENSG0000 response | Inflamed | S100A11   | protein_cc chr1  | 1.52E+08 | 1.52E+08 | - | 680   | 12689.97 | 0        | -0.60945 | 0.129287 | -4.71396 | 7.96E-06 | 0.000186 | 0.209195 |
| ENSG0000 response | Inflamed | ADORA2A   | protein_cc chr22 | 24813847 | 24838328 | + | 4193  | 36.29117 | 0.004773 | -0.79822 | 0.169366 | -4.71301 | 7.99E-06 | 0.000187 | 0.209998 |
| ENSG0000 response | Inflamed | GLOD5     | protein_cc chrX  | 48620154 | 48632064 | + | 1061  | 76.26492 | 0.011933 | 0.9424   | 0.199984 | 4.712384 | 8.01E-06 | 0.000187 | 0.210522 |
| ENSG0000 response | Inflamed | GPR65     | protein_cc chr14 | 88471468 | 88478419 | + | 1786  | 187.3723 | 0        | -0.82552 | 0.17532  | -4.70868 | 8.13E-06 | 0.00019  | 0.21367  |
| ENSG0000 response | Inflamed | GUCY1B3   | protein_cc chr4  | 1.57E+08 | 1.57E+08 | + | 3724  | 332.969  | 0.002387 | -1.18713 | 0.252149 | -4.70805 | 8.15E-06 | 0.00019  | 0.21421  |
| ENSG0000 response | Inflamed | KCNE1L    | protein_cc chrX  | 1.09E+08 | 1.09E+08 | - | 1465  | 7.622912 | 0.274463 | -1.11164 | 0.236182 | -4.70671 | 8.19E-06 | 0.000191 | 0.215358 |
| ENSG0000 response | Inflamed | OSMR      | protein_cc chr5  | 38845960 | 38945698 | + | 7174  | 1785.735 | 0        | -1.13009 | 0.240116 | -4.70644 | 8.20E-06 | 0.000191 | 0.215595 |
| ENSG0000 response | Inflamed | STARD8    | protein_cc chrX  | 67867508 | 67945684 | + | 5558  | 527.6205 | 0        | -0.83235 | 0.176859 | -4.70631 | 8.20E-06 | 0.000191 | 0.215708 |
| ENSG0000 response | Inflamed | CTD-2186f | pseudoger chr5   | 32222038 | 32222453 | + | 416   | 0.74463  | 0.799523 | -0.5296  | 0.112532 | -4.70618 | 8.21E-06 | 0.000191 | 0.215819 |
| ENSG0000 response | Inflamed | AGT       | protein_cc chr1  | 2.31E+08 | 2.31E+08 | - | 2291  | 1061.215 | 0        | -1.14108 | 0.242574 | -4.70405 | 8.28E-06 | 0.000192 | 0.21767  |
| ENSG0000 response | Inflamed | CEACAM1f  | protein_cc chr19 | 45202421 | 45213986 | + | 1702  | 2.97136  | 0.460621 | 0.660565 | 0.140425 | 4.704035 | 8.28E-06 | 0.000192 | 0.21768  |
| ENSG0000 response | Inflamed | RP11-625L | antisense chr12  | 24983355 | 24989492 | + | 451   | 7.696897 | 0.362768 | -1.13038 | 0.240307 | -4.7039  | 8.28E-06 | 0.000192 | 0.217795 |
| ENSG0000 response | Inflamed | CXorf21   | protein_cc chrX  | 30576941 | 30595961 | - | 1855  | 123.0215 | 0.002387 | -0.9347  | 0.198738 | -4.70318 | 8.31E-06 | 0.000192 | 0.218429 |
| ENSG0000 response | Inflamed | C19orf35  | protein_cc chr19 | 2274631  | 2282181  | - | 2767  | 75.22196 | 0.002387 | -0.88075 | 0.187297 | -4.70244 | 8.33E-06 | 0.000193 | 0.219071 |
| ENSG0000 response | Inflamed | TYROBP    | protein_cc chr19 | 36395303 | 36399197 | - | 907   | 1692.654 | 0        | -0.79851 | 0.16981  | -4.70236 | 8.34E-06 | 0.000193 | 0.219146 |
| ENSG0000 response | Inflamed | RNASE2    | protein_cc chr14 | 21423611 | 21424595 | + | 755   | 21.95704 | 0.069212 | -1.13222 | 0.241011 | -4.6978  | 8.49E-06 | 0.000196 | 0.223179 |
| ENSG0000 response | Inflamed | IGHV1-46  | IG_V_gene chr14  | 1.07E+08 | 1.07E+08 | - | 655   | 4421.845 | 0        | -1.48106 | 0.315289 | -4.69747 | 8.50E-06 | 0.000196 | 0.223471 |
| ENSG0000 response | Inflamed | PXDC1     | protein_cc chr6  | 3722848  | 3752260  | - | 2474  | 630.6563 | 0        | -0.58881 | 0.125378 | -4.69629 | 8.54E-06 | 0.000197 | 0.224533 |
| ENSG0000 response | Inflamed | RIMBP3B   | protein_cc chr22 | 21737663 | 21743446 | + | 5784  | 4.74463  | 0.178998 | -0.70291 | 0.149675 | -4.69623 | 8.54E-06 | 0.000197 | 0.224588 |
| ENSG0000 response | Inflamed | PTHLH     | protein_cc chr12 | 28111017 | 28125638 | - | 3377  | 88.2864  | 0.033413 | -1.59261 | 0.339321 | -4.69352 | 8.64E-06 | 0.000199 | 0.227033 |
| ENSG0000 response | Inflamed | PPCDC     | protein_cc chr15 | 75315896 | 75409803 | + | 3781  | 485.611  | 0        | -0.38238 | 0.081479 | -4.69301 | 8.65E-06 | 0.000199 | 0.227497 |
| ENSG0000 response | Inflamed | DENND1C   | protein_cc chr19 | 6467218  | 6482568  | - | 4657  | 980.3341 | 0        | -0.72172 | 0.153809 | -4.69228 | 8.68E-06 | 0.000199 | 0.228155 |
| ENSG0000 response | Inflamed | SLAMF9    | protein_cc chr1  | 1.6E+08  | 1.6E+08  | - | 1156  | 5.673031 | 0.403341 | -0.96201 | 0.205038 | -4.69186 | 8.69E-06 | 0.000199 | 0.228541 |
| ENSG0000 response | Inflamed | IGKV1-12  | IG_V_gene chr2   | 89339721 | 89340242 | - | 398   | 5915.943 | 0        | -1.45205 | 0.309485 | -4.69183 | 8.69E-06 | 0.000199 | 0.228569 |
| ENSG0000 response | Inflamed | IGLV2-23  | IG_V_gene chr22  | 23040274 | 23040892 | + | 502   | 16239.5  | 0        | -1.39432 | 0.297231 | -4.69102 | 8.72E-06 | 0.0002   | 0.229309 |
| ENSG0000 response | Inflamed | PFKFB3    | protein_cc chr10 | 6186881  | 6277495  | + | 5534  | 5324.506 | 0        | -1.08265 | 0.230801 | -4.69086 | 8.73E-06 | 0.0002   | 0.229457 |
| ENSG0000 response | Inflamed | PMCH      | protein_cc chr12 | 1.03E+08 | 1.03E+08 | - | 766   | 1.754177 | 0.689737 | -0.67545 | 0.143999 | -4.69068 | 8.73E-06 | 0.0002   | 0.229624 |
| ENSG0000 response | Inflamed | SERPINH1  | protein_cc chr11 | 75273101 | 75283828 | + | 4914  | 5761.453 | 0        | -0.67862 | 0.144686 | -4.69034 | 8.75E-06 | 0.0002   | 0.229935 |
| ENSG0000 response | Inflamed | TNFAIP8L1 | protein_cc chr19 | 4639530  | 4655580  | + | 6667  | 966.3246 | 0        | -0.51118 | 0.108993 | -4.69005 | 8.76E-06 | 0.0002   | 0.230204 |
| ENSG0000 response | Inflamed | IGHV5-51  | IG_V_gene chr14  | 1.07E+08 | 1.07E+08 | - | 410   | 11849.12 | 0        | -1.28138 | 0.273463 | -4.68574 | 8.91E-06 | 0.000203 | 0.2342   |

|                   |          |           |                  |          |          |   |       |          |          |          |          |          |          |          |          |
|-------------------|----------|-----------|------------------|----------|----------|---|-------|----------|----------|----------|----------|----------|----------|----------|----------|
| ENSG0000 response | Inflamed | SNAI1     | protein_cc chr20 | 48599536 | 48605423 | + | 1686  | 195.7446 | 0.002387 | -1.16848 | 0.249456 | -4.68413 | 8.97E-06 | 0.000204 | 0.235706 |
| ENSG0000 response | Inflamed | SELENBP1  | protein_cc chr1  | 1.51E+08 | 1.51E+08 | - | 3504  | 20717.5  | 0        | 1.021604 | 0.218155 | 4.682919 | 9.01E-06 | 0.000205 | 0.236853 |
| ENSG0000 response | Inflamed | SIX2      | protein_cc chr2  | 45232300 | 45236569 | - | 2205  | 7.749403 | 0.245823 | -1.08888 | 0.232534 | -4.68267 | 9.02E-06 | 0.000205 | 0.237085 |
| ENSG0000 response | Inflamed | IGFBP5    | protein_cc chr2  | 2.18E+08 | 2.18E+08 | - | 6442  | 29509.17 | 0        | -1.35041 | 0.288441 | -4.68175 | 9.05E-06 | 0.000206 | 0.23796  |
| ENSG0000 response | Inflamed | PHACTR1   | protein_cc chr6  | 12717893 | 13288645 | + | 8489  | 182.8091 | 0.002387 | -0.85255 | 0.182101 | -4.68171 | 9.05E-06 | 0.000206 | 0.237996 |
| ENSG0000 response | Inflamed | MEF2B     | protein_cc chr19 | 19256377 | 19303400 | - | 2724  | 54.1074  | 0        | -0.86998 | 0.185853 | -4.68102 | 9.08E-06 | 0.000206 | 0.238656 |
| ENSG0000 response | Inflamed | FCGR1A    | protein_cc chr1  | 1.5E+08  | 1.5E+08  | + | 2998  | 118.0024 | 0.002387 | -1.13609 | 0.242785 | -4.67939 | 9.14E-06 | 0.000207 | 0.240209 |
| ENSG0000 response | Inflamed | LINC00847 | lincRNA chr5     | 1.8E+08  | 1.8E+08  | + | 2453  | 550.6086 | 0        | -0.36959 | 0.079    | -4.67841 | 9.17E-06 | 0.000208 | 0.241151 |
| ENSG0000 response | Inflamed | NRARP     | protein_cc chr9  | 1.4E+08  | 1.4E+08  | - | 2621  | 5543.547 | 0        | 0.68618  | 0.146673 | 4.678289 | 9.18E-06 | 0.000208 | 0.241271 |
| ENSG0000 response | Inflamed | IL17A     | protein_cc chr6  | 52051185 | 52055436 | + | 1859  | 51.1432  | 0.143198 | -1.47576 | 0.315472 | -4.67795 | 9.19E-06 | 0.000208 | 0.241594 |
| ENSG0000 response | Inflamed | AC073072  | antisense chr7   | 22765014 | 22767239 | - | 1364  | 6.054893 | 0.357995 | -0.95838 | 0.204936 | -4.67648 | 9.24E-06 | 0.000209 | 0.243022 |
| ENSG0000 response | Inflamed | AC074289  | antisense chr2   | 64370373 | 64479993 | + | 2453  | 131.0716 | 0        | -1.14005 | 0.243866 | -4.67491 | 9.30E-06 | 0.00021  | 0.244547 |
| ENSG0000 response | Inflamed | S1PR1     | protein_cc chr1  | 1.02E+08 | 1.02E+08 | + | 3071  | 892.8663 | 0.002387 | -1.04607 | 0.223764 | -4.67487 | 9.30E-06 | 0.00021  | 0.244584 |
| ENSG0000 response | Inflamed | SUCLG1    | protein_cc chr2  | 84650647 | 84687169 | - | 4286  | 2937.94  | 0        | 0.516581 | 0.110509 | 4.674566 | 9.31E-06 | 0.00021  | 0.244882 |
| ENSG0000 response | Inflamed | CEP128    | protein_cc chr14 | 80943330 | 81425861 | - | 9495  | 168.4821 | 0        | -1.04972 | 0.224574 | -4.67425 | 9.33E-06 | 0.00021  | 0.245191 |
| ENSG0000 response | Inflamed | PRKCDBP   | protein_cc chr11 | 6340176  | 6341877  | - | 1672  | 674.7876 | 0        | -0.988   | 0.21144  | -4.67275 | 9.38E-06 | 0.000211 | 0.24666  |
| ENSG0000 response | Inflamed | SOWAHA    | protein_cc chr5  | 1.32E+08 | 1.32E+08 | + | 3456  | 1046.301 | 0        | 1.158018 | 0.247826 | 4.6727   | 9.38E-06 | 0.000211 | 0.246711 |
| ENSG0000 response | Inflamed | AC006042  | pseudoger chr7   | 8019943  | 8021859  | + | 1469  | 20.98807 | 0.124105 | -1.36142 | 0.291462 | -4.67102 | 9.45E-06 | 0.000212 | 0.24837  |
| ENSG0000 response | Inflamed | RP11-316F | lincRNA chr9     | 92316566 | 92334585 | + | 822   | 6.687351 | 0.224344 | -0.83109 | 0.17793  | -4.67092 | 9.45E-06 | 0.000212 | 0.248471 |
| ENSG0000 response | Inflamed | MCAM      | protein_cc chr11 | 1.19E+08 | 1.19E+08 | - | 7420  | 2872.305 | 0        | -0.98131 | 0.210102 | -4.67061 | 9.46E-06 | 0.000212 | 0.248771 |
| ENSG0000 response | Inflamed | ENPP2     | protein_cc chr8  | 1.21E+08 | 1.21E+08 | - | 6729  | 1738.874 | 0        | -0.86418 | 0.185071 | -4.66947 | 9.51E-06 | 0.000213 | 0.249913 |
| ENSG0000 response | Inflamed | KMO       | protein_cc chr1  | 2.42E+08 | 2.42E+08 | + | 5946  | 87.57041 | 0.004773 | -1.04207 | 0.223197 | -4.66884 | 9.53E-06 | 0.000213 | 0.250538 |
| ENSG0000 response | Inflamed | IL2RB     | protein_cc chr22 | 37521878 | 37571094 | - | 4700  | 1723.47  | 0        | -0.7684  | 0.164598 | -4.66834 | 9.55E-06 | 0.000213 | 0.251037 |
| ENSG0000 response | Inflamed | RPL10L    | protein_cc chr14 | 47120222 | 47121028 | - | 807   | 19.14081 | 0.107399 | 1.070217 | 0.229282 | 4.667691 | 9.57E-06 | 0.000213 | 0.251687 |
| ENSG0000 response | Inflamed | KIAA1324  | protein_cc chr1  | 1.1E+08  | 1.1E+08  | + | 9298  | 7087.931 | 0        | 0.91431  | 0.195881 | 4.667673 | 9.57E-06 | 0.000213 | 0.251704 |
| ENSG0000 response | Inflamed | GRAP      | protein_cc chr17 | 18923986 | 18950950 | - | 3107  | 377.1122 | 0        | -0.89148 | 0.19099  | -4.66767 | 9.57E-06 | 0.000213 | 0.25171  |
| ENSG0000 response | Inflamed | OTC       | protein_cc chrX  | 38211798 | 38280703 | + | 1585  | 119.0119 | 0.016706 | 1.419078 | 0.304057 | 4.667139 | 9.59E-06 | 0.000214 | 0.25224  |
| ENSG0000 response | Inflamed | PXMP2     | protein_cc chr12 | 1.33E+08 | 1.33E+08 | + | 2051  | 668.5513 | 0        | 0.691196 | 0.148169 | 4.664908 | 9.68E-06 | 0.000215 | 0.254493 |
| ENSG0000 response | Inflamed | CTD-2540f | lincRNA chr19    | 33795942 | 33800293 | + | 404   | 9.699284 | 0.085919 | 0.699014 | 0.149848 | 4.664814 | 9.68E-06 | 0.000215 | 0.254589 |
| ENSG0000 response | Inflamed | TNIP3     | protein_cc chr4  | 1.22E+08 | 1.22E+08 | - | 3768  | 588.3986 | 0.00716  | -2.11843 | 0.454211 | -4.66399 | 9.72E-06 | 0.000216 | 0.255429 |
| ENSG0000 response | Inflamed | GPR153    | protein_cc chr1  | 6307406  | 6321035  | - | 4082  | 3083.709 | 0        | 0.660198 | 0.141587 | 4.662838 | 9.76E-06 | 0.000217 | 0.256601 |
| ENSG0000 response | Inflamed | PLEKHG6   | protein_cc chr12 | 6419602  | 6437672  | + | 4260  | 3806.47  | 0        | 1.069543 | 0.229481 | 4.660708 | 9.84E-06 | 0.000218 | 0.258786 |
| ENSG0000 response | Inflamed | CDH6      | protein_cc chr5  | 31193857 | 31329253 | + | 12379 | 107.4964 | 0.009547 | -0.92691 | 0.198919 | -4.65974 | 9.88E-06 | 0.000219 | 0.259788 |
| ENSG0000 response | Inflamed | CCDC71L   | protein_cc chr7  | 1.06E+08 | 1.06E+08 | - | 4232  | 1253.31  | 0        | -0.72201 | 0.154959 | -4.65934 | 9.90E-06 | 0.000219 | 0.2602   |
| ENSG0000 response | Inflamed | RP11-680f | antisense chr12  | 53692449 | 53694098 | - | 637   | 7.811456 | 0.150358 | -0.94085 | 0.201947 | -4.65891 | 9.91E-06 | 0.000219 | 0.260642 |
| ENSG0000 response | Inflamed | IGLV1-51  | IG_V_gene chr22  | 22676828 | 22677336 | + | 400   | 11144.61 | 0        | -1.44779 | 0.310773 | -4.65867 | 9.92E-06 | 0.000219 | 0.26089  |
| ENSG0000 response | Inflamed | 04-Sep    | protein_cc chr17 | 56597611 | 56618179 | - | 8012  | 274.7064 | 0        | -0.78353 | 0.168245 | -4.65707 | 9.99E-06 | 0.000221 | 0.262558 |
| ENSG0000 response | Inflamed | BID       | protein_cc chr22 | 18216906 | 18257536 | - | 4418  | 962.8353 | 0        | -0.43445 | 0.093294 | -4.65682 | 1.00E-05 | 0.000221 | 0.262823 |
| ENSG0000 response | Inflamed | KCNK12    | protein_cc chr2  | 47743720 | 47798078 | - | 6685  | 54.25776 | 0.004773 | -1.01518 | 0.218027 | -4.65622 | 1.00E-05 | 0.000221 | 0.26345  |
| ENSG0000 response | Inflamed | CDKN2D    | protein_cc chr19 | 10677138 | 10679735 | - | 1503  | 296.2291 | 0        | -0.54859 | 0.117838 | -4.65542 | 1.01E-05 | 0.000221 | 0.264288 |

|                   |          |           |                  |          |          |   |       |          |          |          |          |          |          |          |          |
|-------------------|----------|-----------|------------------|----------|----------|---|-------|----------|----------|----------|----------|----------|----------|----------|----------|
| ENSG0000 response | Inflamed | LDLRAD2   | protein_cc chr1  | 22138758 | 22151714 | + | 4490  | 102.9045 | 0.00716  | -1.0112  | 0.217212 | -4.65536 | 1.01E-05 | 0.000221 | 0.264358 |
| ENSG0000 response | Inflamed | NUDT16P   | pseudoger chr3   | 1.31E+08 | 1.31E+08 | + | 2312  | 413.8115 | 0        | 0.538776 | 0.115747 | 4.654759 | 1.01E-05 | 0.000222 | 0.264987 |
| ENSG0000 response | Inflamed | MSNP1     | pseudoger chr5   | 25909612 | 25911343 | + | 1732  | 5.229117 | 0.157518 | -0.70793 | 0.152111 | -4.65401 | 1.01E-05 | 0.000222 | 0.265778 |
| ENSG0000 response | Inflamed | ROBO4     | protein_cc chr11 | 1.25E+08 | 1.25E+08 | - | 7033  | 958.6993 | 0        | -0.97456 | 0.209422 | -4.65357 | 1.01E-05 | 0.000222 | 0.266247 |
| ENSG0000 response | Inflamed | HIST1H2BJ | protein_cc chr6  | 27093676 | 27100541 | - | 1100  | 47.37947 | 0        | -0.61938 | 0.133147 | -4.65182 | 1.02E-05 | 0.000224 | 0.268098 |
| ENSG0000 response | Inflamed | COL4A2    | protein_cc chr13 | 1.11E+08 | 1.11E+08 | + | 7885  | 20230.32 | 0        | -1.00492 | 0.216037 | -4.65162 | 1.02E-05 | 0.000224 | 0.268317 |
| ENSG0000 response | Inflamed | DSCAML1   | protein_cc chr11 | 1.17E+08 | 1.18E+08 | - | 7035  | 78.03819 | 0.01432  | 1.082562 | 0.232732 | 4.651534 | 1.02E-05 | 0.000224 | 0.268409 |
| ENSG0000 response | Inflamed | RP5-857K2 | pseudoger chr1   | 569756   | 570302   | + | 547   | 5465.215 | 0        | 0.700728 | 0.15065  | 4.651361 | 1.02E-05 | 0.000224 | 0.268594 |
| ENSG0000 response | Inflamed | KIR3DX1   | protein_cc chr19 | 55043909 | 55057053 | + | 5199  | 15.97375 | 0.052506 | -0.93378 | 0.200807 | -4.65015 | 1.03E-05 | 0.000224 | 0.26989  |
| ENSG0000 response | Inflamed | AC091878  | antisense chr5   | 17130137 | 17217156 | - | 2941  | 3.138425 | 0.513126 | -0.86053 | 0.185061 | -4.65    | 1.03E-05 | 0.000224 | 0.270053 |
| ENSG0000 response | Inflamed | ESPN      | protein_cc chr1  | 6484848  | 6521430  | + | 4109  | 1556.601 | 0        | 1.16818  | 0.251256 | 4.649361 | 1.03E-05 | 0.000225 | 0.270739 |
| ENSG0000 response | Inflamed | CTC-205M  | sense_ove chr5   | 1.8E+08  | 1.8E+08  | - | 3088  | 114.7876 | 0.009547 | -0.79776 | 0.171662 | -4.64729 | 1.04E-05 | 0.000227 | 0.272979 |
| ENSG0000 response | Inflamed | AC005789  | lincRNA chr19    | 38888821 | 38890521 | + | 1701  | 26.68496 | 0.026253 | -0.94413 | 0.203191 | -4.64651 | 1.04E-05 | 0.000227 | 0.273822 |
| ENSG0000 response | Inflamed | VMO1      | protein_cc chr17 | 4688580  | 4689728  | - | 803   | 83.21718 | 0        | -0.87225 | 0.187746 | -4.64592 | 1.04E-05 | 0.000227 | 0.274465 |
| ENSG0000 response | Inflamed | CD79A     | protein_cc chr19 | 42381190 | 42385439 | + | 1503  | 4882.124 | 0        | -1.26375 | 0.272033 | -4.6456  | 1.05E-05 | 0.000227 | 0.274818 |
| ENSG0000 response | Inflamed | ZBTB7C    | protein_cc chr18 | 45553044 | 45937123 | - | 7648  | 3780.327 | 0        | 0.918656 | 0.197758 | 4.645347 | 1.05E-05 | 0.000227 | 0.275093 |
| ENSG0000 response | Inflamed | AOX1      | protein_cc chr2  | 2.01E+08 | 2.02E+08 | + | 5552  | 165.9523 | 0.011933 | -1.4212  | 0.305945 | -4.64527 | 1.05E-05 | 0.000227 | 0.275178 |
| ENSG0000 response | Inflamed | CAMP      | protein_cc chr3  | 48264837 | 48266981 | + | 745   | 8.221957 | 0.25537  | -1.04476 | 0.224913 | -4.64519 | 1.05E-05 | 0.000227 | 0.275268 |
| ENSG0000 response | Inflamed | MX2       | protein_cc chr21 | 42733870 | 42781317 | + | 13175 | 902.3222 | 0        | -0.90986 | 0.195915 | -4.64415 | 1.05E-05 | 0.000228 | 0.2764   |
| ENSG0000 response | Inflamed | EDN3      | protein_cc chr20 | 57875482 | 57901047 | + | 2675  | 1538.492 | 0.004773 | 1.262538 | 0.271855 | 4.644152 | 1.05E-05 | 0.000228 | 0.276403 |
| ENSG0000 response | Inflamed | RAB40C    | protein_cc chr16 | 639357   | 679272   | + | 4180  | 1813.069 | 0        | 0.386176 | 0.08316  | 4.643786 | 1.05E-05 | 0.000228 | 0.276805 |
| ENSG0000 response | Inflamed | PLXND1    | protein_cc chr3  | 1.29E+08 | 1.29E+08 | - | 9738  | 4803.098 | 0        | -0.8257  | 0.177829 | -4.64326 | 1.06E-05 | 0.000228 | 0.277382 |
| ENSG0000 response | Inflamed | DUSP7     | protein_cc chr3  | 52082935 | 52090566 | - | 5648  | 1340.737 | 0        | -0.53693 | 0.115676 | -4.64165 | 1.06E-05 | 0.00023  | 0.279159 |
| ENSG0000 response | Inflamed | FOXD2-AS1 | antisense chr1   | 47897805 | 47900313 | - | 2509  | 512.9499 | 0        | 0.747849 | 0.161131 | 4.641252 | 1.06E-05 | 0.00023  | 0.279607 |
| ENSG0000 response | Inflamed | BRSK1     | protein_cc chr19 | 55793440 | 55823901 | + | 3841  | 134.9666 | 0        | -0.84047 | 0.181092 | -4.64112 | 1.06E-05 | 0.00023  | 0.279753 |
| ENSG0000 response | Inflamed | MAOA      | protein_cc chrX  | 43515467 | 43606068 | + | 4213  | 7999.68  | 0        | 1.009651 | 0.21755  | 4.641012 | 1.06E-05 | 0.00023  | 0.279873 |
| ENSG0000 response | Inflamed | GPRIN1    | protein_cc chr5  | 1.76E+08 | 1.76E+08 | - | 4211  | 167.4415 | 0.002387 | -0.7203  | 0.155213 | -4.64069 | 1.07E-05 | 0.00023  | 0.280234 |
| ENSG0000 response | Inflamed | CACFD1    | protein_cc chr9  | 1.36E+08 | 1.36E+08 | + | 3518  | 3211.857 | 0        | 0.551393 | 0.118821 | 4.640536 | 1.07E-05 | 0.00023  | 0.280403 |
| ENSG0000 response | Inflamed | MT-RNR2   | Mt_rRNA chrM     | 1671     | 3229     | + | 1559  | 1122924  | 0        | 0.81514  | 0.175715 | 4.638983 | 1.07E-05 | 0.000231 | 0.282137 |
| ENSG0000 response | Inflamed | SH3PXD2B  | protein_cc chr5  | 1.72E+08 | 1.72E+08 | - | 7977  | 3104.971 | 0        | -0.73949 | 0.15948  | -4.63692 | 1.08E-05 | 0.000233 | 0.284462 |
| ENSG0000 response | Inflamed | VIM-AS1   | antisense chr10  | 17256238 | 17271984 | - | 1992  | 93.07399 | 0.002387 | -0.72127 | 0.155611 | -4.63512 | 1.09E-05 | 0.000234 | 0.2865   |
| ENSG0000 response | Inflamed | NT5DC4    | protein_cc chr2  | 1.13E+08 | 1.14E+08 | + | 4225  | 26.53938 | 0.078759 | -1.33384 | 0.287784 | -4.63486 | 1.09E-05 | 0.000234 | 0.286791 |
| ENSG0000 response | Inflamed | DOK5      | protein_cc chr20 | 53092136 | 53267710 | + | 2604  | 27.99045 | 0.031026 | -0.94836 | 0.204621 | -4.63474 | 1.09E-05 | 0.000234 | 0.286927 |
| ENSG0000 response | Inflamed | COQ9      | protein_cc chr16 | 57481337 | 57495187 | + | 4324  | 2032.628 | 0        | 0.382616 | 0.082556 | 4.634601 | 1.09E-05 | 0.000234 | 0.287089 |
| ENSG0000 response | Inflamed | BEST1     | protein_cc chr11 | 61717293 | 61732987 | + | 8930  | 294.3795 | 0        | -0.909   | 0.196139 | -4.6345  | 1.09E-05 | 0.000234 | 0.287207 |
| ENSG0000 response | Inflamed | VEGFC     | protein_cc chr4  | 1.78E+08 | 1.78E+08 | - | 2423  | 153.4153 | 0.004773 | -0.97343 | 0.210107 | -4.633   | 1.10E-05 | 0.000235 | 0.288918 |
| ENSG0000 response | Inflamed | ENDOD1    | protein_cc chr11 | 94822974 | 94865809 | + | 4687  | 3218.8   | 0        | 0.833994 | 0.18002  | 4.632786 | 1.10E-05 | 0.000235 | 0.289165 |
| ENSG0000 response | Inflamed | RP11-420L | antisense chr6   | 3751345  | 3754105  | + | 2761  | 68.39857 | 0.002387 | -0.71801 | 0.155035 | -4.63126 | 1.11E-05 | 0.000236 | 0.290924 |
| ENSG0000 response | Inflamed | FZD5      | protein_cc chr2  | 2.09E+08 | 2.09E+08 | - | 6708  | 4736.234 | 0        | 0.867364 | 0.18731  | 4.630631 | 1.11E-05 | 0.000237 | 0.291648 |
| ENSG0000 response | Inflamed | ADORA1    | protein_cc chr1  | 2.03E+08 | 2.03E+08 | + | 4191  | 181.7279 | 0.002387 | -0.82438 | 0.178042 | -4.63028 | 1.11E-05 | 0.000237 | 0.292052 |



|                   |          |           |                  |          |          |   |       |          |          |          |          |          |          |          |          |
|-------------------|----------|-----------|------------------|----------|----------|---|-------|----------|----------|----------|----------|----------|----------|----------|----------|
| ENSG0000 response | Inflamed | CKB       | protein_cc chr14 | 1.04E+08 | 1.04E+08 | - | 2669  | 26282.63 | 0        | 1.487898 | 0.321497 | 4.62803  | 1.12E-05 | 0.000239 | 0.294673 |
| ENSG0000 response | Inflamed | TRIB2     | protein_cc chr2  | 12857015 | 12882860 | + | 4588  | 1697.695 | 0        | -1.01545 | 0.219422 | -4.62786 | 1.12E-05 | 0.000239 | 0.294867 |
| ENSG0000 response | Inflamed | LIN7A     | protein_cc chr12 | 81186299 | 81331704 | - | 6795  | 76.3031  | 0.002387 | -1.08959 | 0.235464 | -4.62741 | 1.12E-05 | 0.000239 | 0.295397 |
| ENSG0000 response | Inflamed | AC091132  | antisense chr17  | 43530210 | 43541431 | + | 769   | 19.1074  | 0.064439 | -1.01727 | 0.21987  | -4.62668 | 1.13E-05 | 0.000239 | 0.29626  |
| ENSG0000 response | Inflamed | C10orf128 | protein_cc chr10 | 50362773 | 50396630 | - | 4120  | 544.9666 | 0        | -0.60059 | 0.129825 | -4.62616 | 1.13E-05 | 0.00024  | 0.29687  |
| ENSG0000 response | Inflamed | PLCD3     | protein_cc chr17 | 43186335 | 43210721 | - | 6750  | 11066.26 | 0        | 0.702821 | 0.151924 | 4.626123 | 1.13E-05 | 0.00024  | 0.29691  |
| ENSG0000 response | Inflamed | RP11-327F | antisense chr16  | 50769624 | 50774627 | - | 1150  | 40.85442 | 0.00716  | -0.94561 | 0.204414 | -4.62595 | 1.13E-05 | 0.00024  | 0.297112 |
| ENSG0000 response | Inflamed | CDK20     | protein_cc chr9  | 90581356 | 90589668 | - | 5727  | 349.6516 | 0        | 0.615774 | 0.133142 | 4.624931 | 1.13E-05 | 0.00024  | 0.298316 |
| ENSG0000 response | Inflamed | AMPH      | protein_cc chr7  | 38423305 | 38671167 | - | 5636  | 128.4606 | 0.004773 | -0.83602 | 0.180823 | -4.62343 | 1.14E-05 | 0.000242 | 0.300095 |
| ENSG0000 response | Inflamed | RASA3     | protein_cc chr13 | 1.15E+08 | 1.15E+08 | - | 4352  | 1623.272 | 0        | -0.68706 | 0.14866  | -4.62173 | 1.15E-05 | 0.000243 | 0.302131 |
| ENSG0000 response | Inflamed | AGAP2     | protein_cc chr12 | 58118980 | 58135940 | - | 5292  | 559.4272 | 0        | -0.83742 | 0.181243 | -4.62041 | 1.16E-05 | 0.000244 | 0.303715 |
| ENSG0000 response | Inflamed | SHKBP1    | protein_cc chr19 | 41082757 | 41097305 | + | 3936  | 3452.442 | 0        | -0.38312 | 0.082928 | -4.61997 | 1.16E-05 | 0.000244 | 0.304238 |
| ENSG0000 response | Inflamed | MYBPC3    | protein_cc chr11 | 47352957 | 47374253 | - | 4268  | 24.85442 | 0.047733 | -1.09991 | 0.238286 | -4.61595 | 1.18E-05 | 0.000248 | 0.309125 |
| ENSG0000 response | Inflamed | CSRP2     | protein_cc chr12 | 77252495 | 77272840 | - | 5873  | 306.6563 | 0        | -0.92673 | 0.200805 | -4.61506 | 1.18E-05 | 0.000249 | 0.310219 |
| ENSG0000 response | Inflamed | SFTA2     | protein_cc chr6  | 30899130 | 30899952 | - | 691   | 3.868735 | 0.575179 | -0.92616 | 0.200701 | -4.61463 | 1.18E-05 | 0.000249 | 0.310737 |
| ENSG0000 response | Inflamed | IL15RA    | protein_cc chr10 | 5990855  | 6020150  | - | 3168  | 1020.833 | 0        | -0.53065 | 0.114995 | -4.61449 | 1.18E-05 | 0.000249 | 0.31091  |
| ENSG0000 response | Inflamed | CD1A      | protein_cc chr1  | 1.58E+08 | 1.58E+08 | + | 2096  | 20.43675 | 0.069212 | -0.9245  | 0.200415 | -4.61294 | 1.19E-05 | 0.00025  | 0.312825 |
| ENSG0000 response | Inflamed | IGHV1-17  | IG_V_pseu chr14  | 1.07E+08 | 1.07E+08 | - | 334   | 10.70883 | 0.116945 | -1.08926 | 0.236178 | -4.61203 | 1.19E-05 | 0.000251 | 0.313964 |
| ENSG0000 response | Inflamed | ACAP1     | protein_cc chr17 | 7239848  | 7254797  | + | 7421  | 1470.544 | 0        | -0.8318  | 0.180377 | -4.61148 | 1.20E-05 | 0.000251 | 0.314638 |
| ENSG0000 response | Inflamed | PPP1R16B  | protein_cc chr20 | 37434348 | 37551667 | + | 6400  | 2725.857 | 0        | -0.76181 | 0.165207 | -4.61126 | 1.20E-05 | 0.000251 | 0.314913 |
| ENSG0000 response | Inflamed | B3GNT7    | protein_cc chr2  | 2.32E+08 | 2.32E+08 | + | 3806  | 9072.542 | 0        | 1.313157 | 0.284774 | 4.61123  | 1.20E-05 | 0.000251 | 0.314954 |
| ENSG0000 response | Inflamed | SOX17     | protein_cc chr8  | 55370495 | 55373448 | + | 2342  | 115.1289 | 0.00716  | -1.07463 | 0.233121 | -4.60974 | 1.21E-05 | 0.000252 | 0.31682  |
| ENSG0000 response | Inflamed | AC061992  | lincRNA chr17    | 76311810 | 76343879 | + | 1145  | 10.04296 | 0.095465 | -0.93206 | 0.202203 | -4.60951 | 1.21E-05 | 0.000252 | 0.317107 |
| ENSG0000 response | Inflamed | FBXL14    | protein_cc chr12 | 1675159  | 1703331  | - | 2287  | 1099.203 | 0        | 0.482937 | 0.104785 | 4.608855 | 1.21E-05 | 0.000253 | 0.317929 |
| ENSG0000 response | Inflamed | BAG1      | protein_cc chr9  | 33247818 | 33264761 | - | 7108  | 3422.721 | 0        | 0.372455 | 0.080844 | 4.607093 | 1.22E-05 | 0.000254 | 0.320153 |
| ENSG0000 response | Inflamed | GALNT14   | protein_cc chr2  | 31133333 | 31378068 | - | 4567  | 49.821   | 0.047733 | -1.34762 | 0.292587 | -4.60589 | 1.22E-05 | 0.000256 | 0.321676 |
| ENSG0000 response | Inflamed | RAB34     | protein_cc chr17 | 27041299 | 27045447 | - | 3328  | 789.7422 | 0        | -0.72998 | 0.158516 | -4.60508 | 1.23E-05 | 0.000256 | 0.322715 |
| ENSG0000 response | Inflamed | CCR7      | protein_cc chr17 | 38710021 | 38721724 | - | 2508  | 573.3031 | 0        | -1.38013 | 0.299742 | -4.60438 | 1.23E-05 | 0.000257 | 0.3236   |
| ENSG0000 response | Inflamed | COL6A3    | protein_cc chr2  | 2.38E+08 | 2.38E+08 | - | 19624 | 27544.11 | 0        | -1.10109 | 0.239172 | -4.60378 | 1.23E-05 | 0.000257 | 0.324381 |
| ENSG0000 response | Inflamed | NANS      | protein_cc chr9  | 1.01E+08 | 1.01E+08 | + | 4922  | 4206.236 | 0        | 0.461136 | 0.100187 | 4.602747 | 1.24E-05 | 0.000258 | 0.325702 |
| ENSG0000 response | Inflamed | TINF2     | protein_cc chr14 | 24708849 | 24711880 | - | 2712  | 1855.43  | 0        | -0.2874  | 0.062462 | -4.60117 | 1.25E-05 | 0.000259 | 0.327737 |
| ENSG0000 response | Inflamed | Mt-TL1    | Mt_trNA chrM     | 3230     | 3304     | + | 75    | 1825.912 | 0        | 0.716326 | 0.155684 | 4.601151 | 1.25E-05 | 0.000259 | 0.327764 |
| ENSG0000 response | Inflamed | FAM127C   | protein_cc chrX  | 1.34E+08 | 1.34E+08 | - | 2017  | 225.1313 | 0.002387 | -0.73315 | 0.159361 | -4.60058 | 1.25E-05 | 0.000259 | 0.328506 |
| ENSG0000 response | Inflamed | UGT2B7    | protein_cc chr4  | 69917081 | 69978705 | + | 2259  | 98.43198 | 0.016706 | 1.005378 | 0.218574 | 4.599719 | 1.25E-05 | 0.00026  | 0.329624 |
| ENSG0000 response | Inflamed | SLC1A4    | protein_cc chr2  | 65215611 | 65250999 | + | 6939  | 2935.217 | 0        | -0.60283 | 0.131131 | -4.59714 | 1.27E-05 | 0.000263 | 0.332999 |
| ENSG0000 response | Inflamed | MPO       | protein_cc chr17 | 56347217 | 56358296 | - | 3622  | 8.334129 | 0.069212 | -0.69282 | 0.150714 | -4.59691 | 1.27E-05 | 0.000263 | 0.333302 |
| ENSG0000 response | Inflamed | CLRN3     | protein_cc chr10 | 1.3E+08  | 1.3E+08  | - | 1152  | 1802.494 | 0        | 1.038583 | 0.226    | 4.595508 | 1.27E-05 | 0.000264 | 0.335154 |
| ENSG0000 response | Inflamed | IGHV3-13  | IG_V_gene chr14  | 1.07E+08 | 1.07E+08 | - | 428   | 1384.322 | 0.002387 | -1.43254 | 0.311812 | -4.59426 | 1.28E-05 | 0.000265 | 0.336805 |
| ENSG0000 response | Inflamed | SYT11     | protein_cc chr1  | 1.56E+08 | 1.56E+08 | + | 5240  | 648.6921 | 0        | -0.81489 | 0.177383 | -4.59394 | 1.28E-05 | 0.000265 | 0.337241 |
| ENSG0000 response | Inflamed | IGLV3-25  | IG_V_gene chr22  | 23029190 | 23029735 | + | 380   | 6859.384 | 0        | -1.53584 | 0.33433  | -4.59378 | 1.28E-05 | 0.000265 | 0.337448 |

|                   |          |           |                  |          |          |   |       |          |          |          |          |          |          |          |          |
|-------------------|----------|-----------|------------------|----------|----------|---|-------|----------|----------|----------|----------|----------|----------|----------|----------|
| ENSG0000 response | Inflamed | LHX4      | protein_cc chr1  | 1.8E+08  | 1.8E+08  | + | 7324  | 76.179   | 0.00716  | 1.188343 | 0.258808 | 4.591595 | 1.29E-05 | 0.000267 | 0.340374 |
| ENSG0000 response | Inflamed | CSTF3-AS1 | antisense chr11  | 33183203 | 33213144 | + | 2062  | 3.389021 | 0.295943 | -0.63361 | 0.138001 | -4.59134 | 1.30E-05 | 0.000267 | 0.340717 |
| ENSG0000 response | Inflamed | SELM      | protein_cc chr22 | 31500758 | 31516055 | - | 3187  | 1417.453 | 0        | -0.72982 | 0.158982 | -4.5906  | 1.30E-05 | 0.000268 | 0.341709 |
| ENSG0000 response | Inflamed | IL16      | protein_cc chr15 | 81451916 | 81605104 | + | 10875 | 2563.768 | 0        | -0.75161 | 0.163739 | -4.59027 | 1.30E-05 | 0.000268 | 0.342157 |
| ENSG0000 response | Inflamed | LRRC14B   | protein_cc chr5  | 191626   | 195468   | + | 1573  | 5.673031 | 0.186158 | -0.82305 | 0.179312 | -4.59004 | 1.30E-05 | 0.000268 | 0.342474 |
| ENSG0000 response | Inflamed | IGHV1-24  | IG_V_gene chr14  | 1.07E+08 | 1.07E+08 | - | 411   | 3828.16  | 0        | -1.64861 | 0.359196 | -4.58973 | 1.30E-05 | 0.000268 | 0.342885 |
| ENSG0000 response | Inflamed | SYDE1     | protein_cc chr19 | 15218214 | 15225799 | + | 3965  | 763.3437 | 0        | -0.83289 | 0.181479 | -4.58948 | 1.31E-05 | 0.000268 | 0.343232 |
| ENSG0000 response | Inflamed | QPCTL     | protein_cc chr19 | 46195741 | 46207247 | + | 2396  | 569.6802 | 0        | -0.44087 | 0.096071 | -4.58901 | 1.31E-05 | 0.000268 | 0.343862 |
| ENSG0000 response | Inflamed | TPRG1L    | protein_cc chr1  | 3541566  | 3546691  | + | 2414  | 3689.589 | 0        | 0.354605 | 0.077302 | 4.58727  | 1.32E-05 | 0.00027  | 0.346235 |
| ENSG0000 response | Inflamed | FHL3      | protein_cc chr1  | 38462442 | 38471278 | - | 2004  | 509.7828 | 0        | -0.70497 | 0.153715 | -4.5862  | 1.32E-05 | 0.000271 | 0.347696 |
| ENSG0000 response | Inflamed | GLTP      | protein_cc chr12 | 1.1E+08  | 1.1E+08  | - | 2696  | 2408.749 | 0        | 0.430355 | 0.093856 | 4.585276 | 1.33E-05 | 0.000271 | 0.34897  |
| ENSG0000 response | Inflamed | ANKLE1    | protein_cc chr19 | 17392454 | 17398455 | + | 3569  | 48.37232 | 0.016706 | -0.83547 | 0.182209 | -4.58524 | 1.33E-05 | 0.000271 | 0.349022 |
| ENSG0000 response | Inflamed | SRPR      | protein_cc chr11 | 1.26E+08 | 1.26E+08 | - | 4167  | 8540.143 | 0        | -0.40876 | 0.08915  | -4.58509 | 1.33E-05 | 0.000271 | 0.349228 |
| ENSG0000 response | Inflamed | TTR       | protein_cc chr18 | 29171689 | 29178974 | + | 2070  | 18.71599 | 0.042959 | 0.963354 | 0.210111 | 4.584979 | 1.33E-05 | 0.000271 | 0.349379 |
| ENSG0000 response | Inflamed | SOCS1     | protein_cc chr16 | 11348262 | 11350036 | - | 1225  | 621.043  | 0        | -1.00254 | 0.21868  | -4.58449 | 1.33E-05 | 0.000272 | 0.350053 |
| ENSG0000 response | Inflamed | RRAGD     | protein_cc chr6  | 90074355 | 90121989 | - | 5072  | 230.2148 | 0        | -0.54963 | 0.119903 | -4.584   | 1.33E-05 | 0.000272 | 0.350732 |
| ENSG0000 response | Inflamed | SUSD3     | protein_cc chr9  | 95820989 | 95847420 | + | 1244  | 222.0072 | 0        | -0.78931 | 0.17219  | -4.58398 | 1.33E-05 | 0.000272 | 0.350754 |
| ENSG0000 response | Inflamed | IGLC7     | IG_C_gene chr22  | 23264766 | 23265203 | + | 438   | 3502.339 | 0        | -1.40314 | 0.306147 | -4.58324 | 1.34E-05 | 0.000272 | 0.351782 |
| ENSG0000 response | Inflamed | RP5-1013A | lincRNA chr20    | 43062837 | 43063236 | + | 400   | 16.06444 | 0.047733 | 0.836316 | 0.182477 | 4.583128 | 1.34E-05 | 0.000272 | 0.351939 |
| ENSG0000 response | Inflamed | IGHV4-61  | IG_V_gene chr14  | 1.07E+08 | 1.07E+08 | - | 455   | 3810.208 | 0        | -1.43759 | 0.313805 | -4.58117 | 1.35E-05 | 0.000274 | 0.354668 |
| ENSG0000 response | Inflamed | HHEX      | protein_cc chr10 | 94447945 | 94455403 | + | 4772  | 378.5585 | 0        | -0.75485 | 0.1648   | -4.5804  | 1.35E-05 | 0.000275 | 0.355746 |
| ENSG0000 response | Inflamed | WNT7A     | protein_cc chr3  | 13857755 | 13921618 | - | 4579  | 5.470167 | 0.501193 | -1.21149 | 0.264612 | -4.57836 | 1.36E-05 | 0.000277 | 0.358623 |
| ENSG0000 response | Inflamed | SOD2      | protein_cc chr6  | 1.6E+08  | 1.6E+08  | - | 18985 | 18554.67 | 0        | -1.07423 | 0.23469  | -4.57721 | 1.37E-05 | 0.000278 | 0.360253 |
| ENSG0000 response | Inflamed | ENO2      | protein_cc chr12 | 7022909  | 7032861  | + | 4281  | 745.2053 | 0        | -0.69329 | 0.151472 | -4.57704 | 1.37E-05 | 0.000278 | 0.360491 |
| ENSG0000 response | Inflamed | C8orf47   | protein_cc chr8  | 99076539 | 99105838 | + | 1761  | 33.6969  | 0.031026 | 0.981231 | 0.214399 | 4.576667 | 1.37E-05 | 0.000278 | 0.361019 |
| ENSG0000 response | Inflamed | KRT6A     | protein_cc chr12 | 52880958 | 52887041 | - | 2928  | 442.5251 | 0.322196 | -2.77354 | 0.606047 | -4.57644 | 1.37E-05 | 0.000278 | 0.361341 |
| ENSG0000 response | Inflamed | GLIPR1    | protein_cc chr12 | 75874460 | 75897633 | + | 6273  | 707.9547 | 0        | -0.82101 | 0.179401 | -4.5764  | 1.37E-05 | 0.000278 | 0.361401 |
| ENSG0000 response | Inflamed | IGHV3-53  | IG_V_gene chr14  | 1.07E+08 | 1.07E+08 | - | 569   | 2820.613 | 0        | -1.46286 | 0.31969  | -4.57588 | 1.38E-05 | 0.000278 | 0.36214  |
| ENSG0000 response | Inflamed | CTD-2555A | antisense chr16  | 89179583 | 89181687 | - | 2105  | 7.152745 | 0.162291 | -0.78034 | 0.17059  | -4.57433 | 1.39E-05 | 0.00028  | 0.364363 |
| ENSG0000 response | Inflamed | IGLV3-19  | IG_V_gene chr22  | 23063108 | 23063630 | + | 377   | 8891.539 | 0        | -1.34734 | 0.29455  | -4.57423 | 1.39E-05 | 0.00028  | 0.364508 |
| ENSG0000 response | Inflamed | PSPH      | protein_cc chr7  | 56078744 | 56119297 | - | 2762  | 229.043  | 0        | -0.3221  | 0.070429 | -4.57332 | 1.39E-05 | 0.00028  | 0.365813 |
| ENSG0000 response | Inflamed | INPP5J    | protein_cc chr22 | 31518717 | 31530682 | + | 4822  | 937.1838 | 0        | 0.957973 | 0.209473 | 4.573246 | 1.39E-05 | 0.00028  | 0.365919 |
| ENSG0000 response | Inflamed | KCNG2     | protein_cc chr18 | 77623668 | 77660184 | + | 2162  | 10.92363 | 0.147971 | -0.93816 | 0.205165 | -4.57272 | 1.39E-05 | 0.000281 | 0.366683 |
| ENSG0000 response | Inflamed | UQCRC1    | protein_cc chr3  | 48636435 | 48648409 | - | 3236  | 9347.998 | 0        | 0.385228 | 0.084255 | 4.572167 | 1.40E-05 | 0.000281 | 0.367476 |
| ENSG0000 response | Inflamed | HSD11B2   | protein_cc chr16 | 67464555 | 67471456 | + | 2674  | 14563.62 | 0        | 1.334898 | 0.29197  | 4.57204  | 1.40E-05 | 0.000281 | 0.36766  |
| ENSG0000 response | Inflamed | SLC29A1   | protein_cc chr6  | 44187242 | 44201888 | + | 3433  | 1124.833 | 0        | -0.53382 | 0.11676  | -4.57195 | 1.40E-05 | 0.000281 | 0.367789 |
| ENSG0000 response | Inflamed | UCHL1     | protein_cc chr4  | 41258430 | 41270472 | + | 2282  | 62.69451 | 0.004773 | -1.14326 | 0.250109 | -4.57104 | 1.40E-05 | 0.000282 | 0.369108 |
| ENSG0000 response | Inflamed | AGTRAP    | protein_cc chr1  | 11796141 | 11814859 | + | 2433  | 867.494  | 0        | -0.54877 | 0.120096 | -4.56941 | 1.41E-05 | 0.000283 | 0.371485 |
| ENSG0000 response | Inflamed | TKTL1     | protein_cc chrX  | 1.54E+08 | 1.54E+08 | + | 3650  | 7.195704 | 0.176611 | -0.87141 | 0.190758 | -4.56816 | 1.42E-05 | 0.000284 | 0.373321 |
| ENSG0000 response | Inflamed | RASSF8-AS | antisense chr12  | 26092262 | 26112698 | - | 3981  | 57.88067 | 0        | -0.96763 | 0.211837 | -4.56779 | 1.42E-05 | 0.000284 | 0.373871 |

|                   |          |           |            |       |          |          |   |      |          |          |          |          |          |          |          |          |
|-------------------|----------|-----------|------------|-------|----------|----------|---|------|----------|----------|----------|----------|----------|----------|----------|----------|
| ENSG0000 response | Inflamed | RNU6-418  | snRNA      | chr1  | 2.06E+08 | 2.06E+08 | + | 107  | 2.763723 | 0.498807 | 0.762099 | 0.166844 | 4.567743 | 1.42E-05 | 0.000284 | 0.373935 |
| ENSG0000 response | Inflamed | C9orf139  | protein_cc | chr9  | 1.4E+08  | 1.4E+08  | + | 3815 | 42.91169 | 0.02864  | -1.11889 | 0.244957 | -4.56768 | 1.42E-05 | 0.000284 | 0.374025 |
| ENSG0000 response | Inflamed | EBI3      | protein_cc | chr19 | 4229495  | 4237528  | + | 1284 | 261.4988 | 0        | -0.80269 | 0.175765 | -4.56685 | 1.43E-05 | 0.000285 | 0.37525  |
| ENSG0000 response | Inflamed | CHN1      | protein_cc | chr2  | 1.76E+08 | 1.76E+08 | - | 4971 | 262.4654 | 0.00716  | -1.11378 | 0.243893 | -4.56668 | 1.43E-05 | 0.000285 | 0.375507 |
| ENSG0000 response | Inflamed | RP11-333C | lincRNA    | chr2  | 12855541 | 12856353 | + | 813  | 2.801909 | 0.451074 | -0.7432  | 0.162751 | -4.5665  | 1.43E-05 | 0.000285 | 0.375769 |
| ENSG0000 response | Inflamed | IGLV3-1   | IG_V_gene  | chr22 | 23222886 | 23223576 | + | 398  | 11455.05 | 0        | -1.46602 | 0.321182 | -4.56447 | 1.44E-05 | 0.000287 | 0.378784 |
| ENSG0000 response | Inflamed | HOXB2     | protein_cc | chr17 | 46618256 | 46623441 | - | 3460 | 287.9714 | 0        | -0.56223 | 0.123177 | -4.56441 | 1.44E-05 | 0.000287 | 0.378867 |
| ENSG0000 response | Inflamed | CCR2      | protein_cc | chr3  | 46395225 | 46402419 | + | 3733 | 420.3556 | 0        | -1.02201 | 0.223948 | -4.56358 | 1.45E-05 | 0.000288 | 0.380112 |
| ENSG0000 response | Inflamed | ELL2      | protein_cc | chr5  | 95220802 | 95297775 | - | 7246 | 2321.671 | 0        | -0.88185 | 0.193244 | -4.5634  | 1.45E-05 | 0.000288 | 0.380374 |
| ENSG0000 response | Inflamed | ACSS2     | protein_cc | chr20 | 33459949 | 33515769 | + | 5389 | 8883.496 | 0        | 0.663116 | 0.145343 | 4.562432 | 1.45E-05 | 0.000289 | 0.381831 |
| ENSG0000 response | Inflamed | EFNA4     | protein_cc | chr1  | 1.55E+08 | 1.55E+08 | + | 1263 | 459.6229 | 0        | 0.372348 | 0.08166  | 4.559749 | 1.47E-05 | 0.000291 | 0.385883 |
| ENSG0000 response | Inflamed | POPD3     | protein_cc | chr6  | 1.06E+08 | 1.06E+08 | - | 1881 | 22.52029 | 0.293556 | -1.38552 | 0.303919 | -4.55884 | 1.47E-05 | 0.000292 | 0.387258 |
| ENSG0000 response | Inflamed | IGKV2D-4C | IG_V_gene  | chr2  | 89890601 | 89891307 | + | 336  | 708.8735 | 0.00716  | -1.78435 | 0.391609 | -4.55646 | 1.49E-05 | 0.000295 | 0.39091  |
| ENSG0000 response | Inflamed | RP11-76E1 | lincRNA    | chr15 | 94425311 | 94429972 | + | 915  | 1.603819 | 0.637232 | -0.61963 | 0.136018 | -4.55547 | 1.49E-05 | 0.000296 | 0.392424 |
| ENSG0000 response | Inflamed | CLDN3     | protein_cc | chr7  | 73183328 | 73184600 | - | 1273 | 13353.75 | 0        | 0.98028  | 0.215219 | 4.5548   | 1.50E-05 | 0.000296 | 0.393464 |
| ENSG0000 response | Inflamed | OAF       | protein_cc | chr11 | 1.2E+08  | 1.2E+08  | + | 3176 | 4747.659 | 0        | 0.51384  | 0.112815 | 4.554696 | 1.50E-05 | 0.000296 | 0.393625 |
| ENSG0000 response | Inflamed | MACROD1   | protein_cc | chr11 | 63766030 | 63933578 | - | 2089 | 451.1169 | 0        | 0.550272 | 0.12082  | 4.554478 | 1.50E-05 | 0.000296 | 0.393962 |
| ENSG0000 response | Inflamed | LAMC3     | protein_cc | chr9  | 1.34E+08 | 1.34E+08 | + | 7594 | 1137.955 | 0        | -1.1603  | 0.254772 | -4.55429 | 1.50E-05 | 0.000296 | 0.394254 |
| ENSG0000 response | Inflamed | TPSG1     | protein_cc | chr16 | 1271651  | 1275257  | - | 1255 | 967.1933 | 0        | 1.080546 | 0.237316 | 4.553203 | 1.51E-05 | 0.000297 | 0.395941 |
| ENSG0000 response | Inflamed | NFKBID    | protein_cc | chr19 | 36378555 | 36393205 | - | 3198 | 442.9547 | 0        | -0.56243 | 0.123524 | -4.55319 | 1.51E-05 | 0.000297 | 0.395956 |
| ENSG0000 response | Inflamed | MMEL1     | protein_cc | chr1  | 2522078  | 2564481  | - | 3896 | 131.8305 | 0        | 0.619341 | 0.136028 | 4.553035 | 1.51E-05 | 0.000297 | 0.396202 |
| ENSG0000 response | Inflamed | ETHE1     | protein_cc | chr19 | 44010871 | 44031396 | - | 1604 | 10187.15 | 0        | 0.738104 | 0.162142 | 4.552203 | 1.51E-05 | 0.000298 | 0.3975   |
| ENSG0000 response | Inflamed | LTA       | protein_cc | chr6  | 31539831 | 31542101 | + | 1737 | 100.5012 | 0.002387 | -0.91079 | 0.200129 | -4.55104 | 1.52E-05 | 0.000299 | 0.399325 |
| ENSG0000 response | Inflamed | HHIPL1    | protein_cc | chr14 | 1E+08    | 1E+08    | + | 7836 | 206.4964 | 0.002387 | -0.90382 | 0.198618 | -4.55054 | 1.52E-05 | 0.000299 | 0.400103 |
| ENSG0000 response | Inflamed | RP11-84C1 | lincRNA    | chr14 | 21387500 | 21388458 | + | 728  | 1.601432 | 0.649165 | -0.60829 | 0.133678 | -4.5504  | 1.52E-05 | 0.000299 | 0.40033  |
| ENSG0000 response | Inflamed | EMP3      | protein_cc | chr19 | 48824766 | 48833810 | + | 1667 | 1196.217 | 0        | -0.86827 | 0.190817 | -4.55028 | 1.52E-05 | 0.000299 | 0.400512 |
| ENSG0000 response | Inflamed | RP11-145A | antisense  | chr1  | 2.26E+08 | 2.26E+08 | + | 1530 | 2.484487 | 0.584726 | -0.7784  | 0.17107  | -4.55016 | 1.52E-05 | 0.000299 | 0.400695 |
| ENSG0000 response | Inflamed | HIP1      | protein_cc | chr7  | 75162621 | 75368280 | - | 8953 | 1350.382 | 0        | -0.75693 | 0.166355 | -4.55011 | 1.52E-05 | 0.000299 | 0.400788 |
| ENSG0000 response | Inflamed | MSX1      | protein_cc | chr4  | 4861393  | 4865663  | + | 2120 | 35.80907 | 0.01432  | -0.90391 | 0.198848 | -4.54574 | 1.55E-05 | 0.000304 | 0.407725 |
| ENSG0000 response | Inflamed | LGALS4    | protein_cc | chr19 | 39292311 | 39304004 | - | 2645 | 89867.48 | 0        | 1.127111 | 0.247955 | 4.545623 | 1.55E-05 | 0.000304 | 0.407905 |
| ENSG0000 response | Inflamed | RP11-330A | lincRNA    | chr2  | 2.2E+08  | 2.2E+08  | - | 456  | 68.11217 | 0        | 0.738699 | 0.162509 | 4.545587 | 1.55E-05 | 0.000304 | 0.407962 |
| ENSG0000 response | Inflamed | HAMP      | protein_cc | chr19 | 35771619 | 35776046 | + | 3010 | 9.868735 | 0.186158 | -1.04104 | 0.22912  | -4.54365 | 1.56E-05 | 0.000306 | 0.411078 |
| ENSG0000 response | Inflamed | BDH1      | protein_cc | chr3  | 1.97E+08 | 1.97E+08 | - | 9112 | 3890.358 | 0        | 0.740029 | 0.162891 | 4.543087 | 1.57E-05 | 0.000306 | 0.411986 |
| ENSG0000 response | Inflamed | HTR1B     | protein_cc | chr6  | 78171948 | 78173490 | - | 1543 | 11.53461 | 0.169451 | -0.97744 | 0.215182 | -4.54239 | 1.57E-05 | 0.000307 | 0.413115 |
| ENSG0000 response | Inflamed | RP11-672A | lincRNA    | chr11 | 76339140 | 76341407 | - | 559  | 1.346062 | 0.649165 | -0.47185 | 0.103898 | -4.54142 | 1.58E-05 | 0.000308 | 0.41469  |
| ENSG0000 response | Inflamed | NFKB2     | protein_cc | chr10 | 1.04E+08 | 1.04E+08 | + | 4479 | 3174.819 | 0        | -0.66853 | 0.147225 | -4.54088 | 1.58E-05 | 0.000308 | 0.415576 |
| ENSG0000 response | Inflamed | OIT3      | protein_cc | chr10 | 74653339 | 74692791 | + | 2365 | 30.70644 | 0.054893 | -1.12075 | 0.246821 | -4.54074 | 1.58E-05 | 0.000308 | 0.41579  |
| ENSG0000 response | Inflamed | DHRS13    | protein_cc | chr17 | 27224799 | 27230089 | - | 2944 | 418.7947 | 0        | -0.39276 | 0.086496 | -4.54073 | 1.58E-05 | 0.000308 | 0.415808 |
| ENSG0000 response | Inflamed | CTLA4     | protein_cc | chr2  | 2.05E+08 | 2.05E+08 | + | 2120 | 179.074  | 0.00716  | -1.20315 | 0.264973 | -4.54066 | 1.58E-05 | 0.000308 | 0.415925 |
| ENSG0000 response | Inflamed | PLA2G7    | protein_cc | chr6  | 46671938 | 46703430 | - | 2965 | 707.2053 | 0        | -0.78593 | 0.173127 | -4.53963 | 1.59E-05 | 0.000309 | 0.41761  |

|                   |          |                    |                  |          |          |   |       |          |          |          |          |          |          |          |          |
|-------------------|----------|--------------------|------------------|----------|----------|---|-------|----------|----------|----------|----------|----------|----------|----------|----------|
| ENSG0000 response | Inflamed | JHDM1D-A antisense | chr7             | 1.4E+08  | 1.4E+08  | + | 2380  | 844.673  | 0        | 0.425173 | 0.093662 | 4.539413 | 1.59E-05 | 0.000309 | 0.417967 |
| ENSG0000 response | Inflamed | FAM162B            | protein_cc chr6  | 1.17E+08 | 1.17E+08 | - | 1033  | 30.91885 | 0.00716  | -0.80537 | 0.177468 | -4.53809 | 1.60E-05 | 0.00031  | 0.420148 |
| ENSG0000 response | Inflamed | POMC               | protein_cc chr2  | 25383722 | 25391772 | - | 1538  | 37.88067 | 0.00716  | -0.97532 | 0.214943 | -4.5376  | 1.60E-05 | 0.00031  | 0.420956 |
| ENSG0000 response | Inflamed | PPARGC1A           | protein_cc chr4  | 23756664 | 23905712 | - | 10511 | 583.7733 | 0        | 1.111872 | 0.245071 | 4.536944 | 1.61E-05 | 0.000311 | 0.422034 |
| ENSG0000 response | Inflamed | OVOL1              | protein_cc chr11 | 65554493 | 65564690 | + | 3849  | 1845.172 | 0        | 0.922687 | 0.203378 | 4.536808 | 1.61E-05 | 0.000311 | 0.422258 |
| ENSG0000 response | Inflamed | ADAMTS2            | protein_cc chr5  | 1.79E+08 | 1.79E+08 | - | 7687  | 1856.076 | 0        | -1.13592 | 0.250403 | -4.53635 | 1.61E-05 | 0.000311 | 0.423009 |
| ENSG0000 response | Inflamed | ITGA2B             | protein_cc chr17 | 42449548 | 42466873 | - | 5551  | 38.83532 | 0.026253 | -0.9637  | 0.212525 | -4.53451 | 1.62E-05 | 0.000313 | 0.426076 |
| ENSG0000 response | Inflamed | NOTCH3             | protein_cc chr19 | 15270444 | 15311792 | - | 8799  | 3047.842 | 0        | -1.20283 | 0.265386 | -4.53238 | 1.63E-05 | 0.000316 | 0.429648 |
| ENSG0000 response | Inflamed | GPRIN2             | protein_cc chr10 | 46994087 | 47005643 | + | 7985  | 2383.253 | 0        | 1.193563 | 0.263376 | 4.531777 | 1.64E-05 | 0.000316 | 0.430669 |
| ENSG0000 response | Inflamed | CYP4F12            | protein_cc chr19 | 15783567 | 15807984 | + | 5351  | 2043.845 | 0        | 1.037282 | 0.228932 | 4.530963 | 1.64E-05 | 0.000317 | 0.432044 |
| ENSG0000 response | Inflamed | RNF166             | protein_cc chr16 | 88762903 | 88772829 | - | 4394  | 1087.597 | 0        | -0.60315 | 0.133152 | -4.52976 | 1.65E-05 | 0.000318 | 0.434088 |
| ENSG0000 response | Inflamed | RP11-665M          | lincRNA chr11    | 64658158 | 64658547 | - | 390   | 679.3962 | 0        | 1.151533 | 0.254237 | 4.529373 | 1.65E-05 | 0.000318 | 0.434744 |
| ENSG0000 response | Inflamed | ALDH1L2            | protein_cc chr12 | 1.05E+08 | 1.05E+08 | - | 8501  | 471.1718 | 0.004773 | -1.14991 | 0.253885 | -4.52926 | 1.65E-05 | 0.000318 | 0.434934 |
| ENSG0000 response | Inflamed | IKZF1              | protein_cc chr7  | 50343720 | 50472799 | + | 9784  | 2100.32  | 0        | -0.83498 | 0.184374 | -4.52871 | 1.66E-05 | 0.000319 | 0.435883 |
| ENSG0000 response | Inflamed | PIWIL2             | protein_cc chr8  | 22132810 | 22215076 | + | 5751  | 68.91647 | 0.002387 | 0.824511 | 0.18211  | 4.52754  | 1.67E-05 | 0.00032  | 0.437877 |
| ENSG0000 response | Inflamed | SNHG18             | lincRNA chr5     | 9546312  | 9550721  | + | 1951  | 591.3532 | 0        | 0.4852   | 0.10717  | 4.527391 | 1.67E-05 | 0.00032  | 0.438132 |
| ENSG0000 response | Inflamed | TST                | protein_cc chr22 | 37406900 | 37415681 | - | 1915  | 7512.582 | 0        | 0.699841 | 0.154585 | 4.52723  | 1.67E-05 | 0.00032  | 0.438409 |
| ENSG0000 response | Inflamed | ADPRH              | protein_cc chr3  | 1.19E+08 | 1.19E+08 | + | 4615  | 482.9594 | 0        | -0.70444 | 0.155635 | -4.52624 | 1.67E-05 | 0.000321 | 0.440108 |
| ENSG0000 response | Inflamed | TPRN               | protein_cc chr9  | 1.4E+08  | 1.4E+08  | - | 5338  | 4647.387 | 0        | 0.683534 | 0.151031 | 4.525792 | 1.68E-05 | 0.000321 | 0.440884 |
| ENSG0000 response | Inflamed | STMN3              | protein_cc chr20 | 62271061 | 62284780 | - | 2449  | 687.6229 | 0        | -0.73498 | 0.162406 | -4.52555 | 1.68E-05 | 0.000321 | 0.441307 |
| ENSG0000 response | Inflamed | HYAL2              | protein_cc chr3  | 50355221 | 50360337 | - | 4545  | 1611.129 | 0        | -0.58049 | 0.128273 | -4.52543 | 1.68E-05 | 0.000321 | 0.441503 |
| ENSG0000 response | Inflamed | UGT2A3             | protein_cc chr4  | 69794181 | 69817509 | - | 3062  | 723.7661 | 0.054893 | 2.08161  | 0.460019 | 4.525053 | 1.68E-05 | 0.000322 | 0.442162 |
| ENSG0000 response | Inflamed | RXFP4              | protein_cc chr1  | 1.56E+08 | 1.56E+08 | + | 1146  | 57.11456 | 0.016706 | 0.909838 | 0.201129 | 4.523651 | 1.69E-05 | 0.000323 | 0.444595 |
| ENSG0000 response | Inflamed | LINC00963          | processed_chr9   | 1.32E+08 | 1.32E+08 | + | 12641 | 1544.177 | 0        | -0.37857 | 0.083726 | -4.52157 | 1.70E-05 | 0.000326 | 0.448225 |
| ENSG0000 response | Inflamed | COX4I2             | protein_cc chr20 | 30225691 | 30232809 | + | 693   | 51.20048 | 0.004773 | -0.89118 | 0.197108 | -4.52131 | 1.71E-05 | 0.000326 | 0.448695 |
| ENSG0000 response | Inflamed | KISS1R             | protein_cc chr19 | 917287   | 921015   | + | 1680  | 9.374702 | 0.140811 | -0.94695 | 0.209456 | -4.52101 | 1.71E-05 | 0.000326 | 0.449219 |
| ENSG0000 response | Inflamed | NOTUM              | protein_cc chr17 | 79910388 | 79919716 | - | 3014  | 39.18138 | 0.062053 | -1.45986 | 0.323037 | -4.51918 | 1.72E-05 | 0.000328 | 0.452435 |
| ENSG0000 response | Inflamed | ALPI               | protein_cc chr2  | 2.33E+08 | 2.33E+08 | + | 2632  | 1174.876 | 0.00716  | 1.594216 | 0.352868 | 4.517877 | 1.73E-05 | 0.000329 | 0.454755 |
| ENSG0000 response | Inflamed | C12orf68           | protein_cc chr12 | 48577366 | 48579709 | + | 2344  | 60.12649 | 0.004773 | -0.87693 | 0.194103 | -4.51786 | 1.73E-05 | 0.000329 | 0.454787 |
| ENSG0000 response | Inflamed | GPR42              | protein_cc chr19 | 35861831 | 35863855 | + | 1854  | 4.642005 | 0.357995 | -0.79203 | 0.175325 | -4.51751 | 1.73E-05 | 0.000329 | 0.455412 |
| ENSG0000 response | Inflamed | OPLAH              | protein_cc chr8  | 1.45E+08 | 1.45E+08 | - | 4321  | 1572.962 | 0        | 0.573373 | 0.126937 | 4.516984 | 1.74E-05 | 0.00033  | 0.456346 |
| ENSG0000 response | Inflamed | CCNJL              | protein_cc chr5  | 1.6E+08  | 1.6E+08  | - | 4731  | 879.5776 | 0        | 0.698693 | 0.154689 | 4.516762 | 1.74E-05 | 0.00033  | 0.456742 |
| ENSG0000 response | Inflamed | ANXA6              | protein_cc chr5  | 1.5E+08  | 1.51E+08 | - | 5427  | 4451.086 | 0        | -0.71456 | 0.158204 | -4.51671 | 1.74E-05 | 0.00033  | 0.456834 |
| ENSG0000 response | Inflamed | AC097468           | antisense chr2   | 2.2E+08  | 2.2E+08  | + | 1992  | 11.62291 | 0.114558 | 0.947654 | 0.209836 | 4.516165 | 1.74E-05 | 0.00033  | 0.457811 |
| ENSG0000 response | Inflamed | SNCA               | protein_cc chr4  | 90645250 | 90759466 | - | 4011  | 65.97852 | 0.004773 | -0.85814 | 0.190161 | -4.51269 | 1.77E-05 | 0.000334 | 0.464079 |
| ENSG0000 response | Inflamed | LRR8C              | protein_cc chr1  | 90098631 | 90235462 | + | 11724 | 522.8425 | 0        | -0.84473 | 0.187269 | -4.51081 | 1.78E-05 | 0.000337 | 0.467495 |
| ENSG0000 response | Inflamed | GLA                | protein_cc chrX  | 1.01E+08 | 1.01E+08 | - | 2065  | 636.3675 | 0        | -0.45249 | 0.100319 | -4.51058 | 1.78E-05 | 0.000337 | 0.467917 |
| ENSG0000 response | Inflamed | IGKV1-6            | IG_V_gene chr2   | 89265781 | 89266286 | - | 380   | 3773.427 | 0        | -1.35018 | 0.299361 | -4.51021 | 1.78E-05 | 0.000337 | 0.468598 |
| ENSG0000 response | Inflamed | NEXN-AS1           | antisense chr1   | 78347033 | 78355224 | - | 2583  | 4.334129 | 0.338902 | -0.86461 | 0.191742 | -4.50924 | 1.79E-05 | 0.000338 | 0.470372 |
| ENSG0000 response | Inflamed | DAO                | protein_cc chr12 | 1.09E+08 | 1.09E+08 | + | 3883  | 48.63484 | 0.088305 | 1.274008 | 0.282646 | 4.507435 | 1.80E-05 | 0.00034  | 0.473702 |

|                   |          |           |                  |          |          |   |       |          |          |          |          |          |          |          |          |
|-------------------|----------|-----------|------------------|----------|----------|---|-------|----------|----------|----------|----------|----------|----------|----------|----------|
| ENSG0000 response | Inflamed | C10orf54  | protein_cc chr10 | 73507316 | 73533255 | - | 5128  | 6179.597 | 0        | -0.50573 | 0.112206 | -4.50716 | 1.80E-05 | 0.00034  | 0.474218 |
| ENSG0000 response | Inflamed | GIPC2     | protein_cc chr1  | 78445226 | 78604133 | + | 3973  | 875.895  | 0        | 0.830442 | 0.184306 | 4.505783 | 1.81E-05 | 0.000342 | 0.476768 |
| ENSG0000 response | Inflamed | DNM1P47   | pseudoger chr15  | 1.02E+08 | 1.02E+08 | + | 15281 | 10.94749 | 0.109785 | -0.82199 | 0.182444 | -4.50546 | 1.82E-05 | 0.000342 | 0.477366 |
| ENSG0000 response | Inflamed | ANKDD1B   | protein_cc chr5  | 74907284 | 74967671 | + | 3287  | 115.1671 | 0.004773 | 0.95736  | 0.212502 | 4.505185 | 1.82E-05 | 0.000342 | 0.477883 |
| ENSG0000 response | Inflamed | FFAR3     | protein_cc chr19 | 35849362 | 35851387 | + | 1855  | 15.69451 | 0.157518 | -1.19024 | 0.264271 | -4.50385 | 1.83E-05 | 0.000344 | 0.480387 |
| ENSG0000 response | Inflamed | MAP4K1    | protein_cc chr19 | 39078281 | 39109522 | - | 3953  | 963.0072 | 0        | -0.7933  | 0.176186 | -4.50265 | 1.84E-05 | 0.000345 | 0.482643 |
| ENSG0000 response | Inflamed | RP11-77K1 | pseudoger chr16  | 75533686 | 75550178 | - | 830   | 83.84487 | 0.02148  | 1.1382   | 0.252794 | 4.502475 | 1.84E-05 | 0.000345 | 0.482966 |
| ENSG0000 response | Inflamed | IGKV1D-43 | IG_V_gene chr2   | 90248739 | 90249395 | + | 532   | 18.03103 | 0.121718 | -1.12781 | 0.250549 | -4.50136 | 1.85E-05 | 0.000346 | 0.485082 |
| ENSG0000 response | Inflamed | SLC12A4   | protein_cc chr16 | 67977377 | 68003504 | - | 8298  | 1411.449 | 0        | -0.71061 | 0.157906 | -4.50021 | 1.85E-05 | 0.000348 | 0.487258 |
| ENSG0000 response | Inflamed | RP11-326C | lincRNA chr11    | 327171   | 330122   | + | 1277  | 13.30788 | 0.138425 | -1.05146 | 0.233686 | -4.49944 | 1.86E-05 | 0.000348 | 0.488712 |
| ENSG0000 response | Inflamed | XXyac-YM2 | antisense chr9   | 90471930 | 90474314 | - | 2014  | 22.36277 | 0.348449 | 1.152411 | 0.256198 | 4.49812  | 1.87E-05 | 0.00035  | 0.491245 |
| ENSG0000 response | Inflamed | PCDH17    | protein_cc chr13 | 58205944 | 58303445 | + | 8242  | 323.074  | 0.00716  | -1.1476  | 0.25519  | -4.49706 | 1.88E-05 | 0.000351 | 0.493288 |
| ENSG0000 response | Inflamed | HS3ST3A1  | protein_cc chr17 | 13399006 | 13505244 | - | 2628  | 82.91169 | 0.004773 | -0.96085 | 0.213712 | -4.49602 | 1.88E-05 | 0.000352 | 0.495279 |
| ENSG0000 response | Inflamed | RP11-108F | lincRNA chr18    | 56481112 | 56501596 | + | 478   | 2.217184 | 0.553699 | -0.6274  | 0.139577 | -4.49501 | 1.89E-05 | 0.000353 | 0.497235 |
| ENSG0000 response | Inflamed | AMPD1     | protein_cc chr1  | 1.15E+08 | 1.15E+08 | - | 2496  | 189.7804 | 0        | -0.97072 | 0.215956 | -4.49499 | 1.89E-05 | 0.000353 | 0.497281 |
| ENSG0000 response | Inflamed | CLDN4     | protein_cc chr7  | 73213872 | 73247014 | + | 4693  | 23479.48 | 0        | 0.87985  | 0.195835 | 4.492822 | 1.91E-05 | 0.000356 | 0.501503 |
| ENSG0000 response | Inflamed | PKN1      | protein_cc chr19 | 14543865 | 14582679 | + | 4606  | 2892.215 | 0        | -0.57067 | 0.127048 | -4.49179 | 1.92E-05 | 0.000357 | 0.503521 |
| ENSG0000 response | Inflamed | AC069363  | antisense chr17  | 34400226 | 34417480 | + | 1706  | 12.66348 | 0.119332 | -0.90717 | 0.201964 | -4.49177 | 1.92E-05 | 0.000357 | 0.503565 |
| ENSG0000 response | Inflamed | GIPC1     | protein_cc chr19 | 14588572 | 14606944 | - | 4423  | 10770.74 | 0        | 0.524485 | 0.116788 | 4.490911 | 1.92E-05 | 0.000358 | 0.505253 |
| ENSG0000 response | Inflamed | MT-ATP8   | protein_cc chrM  | 8366     | 8572     | + | 207   | 114755.2 | 0        | 0.507715 | 0.1131   | 4.489087 | 1.94E-05 | 0.00036  | 0.508857 |
| ENSG0000 response | Inflamed | CSTA      | protein_cc chr3  | 1.22E+08 | 1.22E+08 | + | 1373  | 100.8974 | 0        | -0.96288 | 0.21453  | -4.48833 | 1.94E-05 | 0.000361 | 0.510367 |
| ENSG0000 response | Inflamed | AP000344  | lincRNA chr22    | 23775751 | 23777258 | + | 1083  | 28.17422 | 0.109785 | 1.068875 | 0.238148 | 4.488273 | 1.94E-05 | 0.000361 | 0.510475 |
| ENSG0000 response | Inflamed | LINC0094C | lincRNA chr12    | 2038368  | 2045740  | - | 2350  | 37.62768 | 0.119332 | 1.305829 | 0.290971 | 4.487824 | 1.95E-05 | 0.000361 | 0.511367 |
| ENSG0000 response | Inflamed | IGKV1-17  | IG_V_gene chr2   | 89416833 | 89417335 | - | 378   | 8348.06  | 0        | -1.49984 | 0.334233 | -4.48741 | 1.95E-05 | 0.000361 | 0.512185 |
| ENSG0000 response | Inflamed | DPYSL4    | protein_cc chr10 | 1.34E+08 | 1.34E+08 | + | 3176  | 36.4105  | 0.045346 | -1.16761 | 0.260223 | -4.48694 | 1.95E-05 | 0.000362 | 0.513141 |
| ENSG0000 response | Inflamed | RP11-216L | processed_chr9   | 1.4E+08  | 1.4E+08  | + | 4335  | 114.0931 | 0        | 0.916302 | 0.204237 | 4.486471 | 1.96E-05 | 0.000362 | 0.51407  |
| ENSG0000 response | Inflamed | PRKAG2-A  | antisense chr7   | 1.52E+08 | 1.52E+08 | + | 1154  | 95.57279 | 0.002387 | 0.598778 | 0.133472 | 4.486153 | 1.96E-05 | 0.000362 | 0.514707 |
| ENSG0000 response | Inflamed | CTD-2342I | lincRNA chr8     | 1.36E+08 | 1.36E+08 | + | 1003  | 5.945107 | 0.245823 | -0.8966  | 0.199879 | -4.48568 | 1.96E-05 | 0.000363 | 0.515654 |
| ENSG0000 response | Inflamed | GPR19     | protein_cc chr12 | 12813825 | 12849141 | - | 2623  | 16.78759 | 0.011933 | -0.6979  | 0.155658 | -4.48353 | 1.98E-05 | 0.000366 | 0.520002 |
| ENSG0000 response | Inflamed | FCHO1     | protein_cc chr19 | 17858527 | 17899377 | + | 5700  | 557.0835 | 0        | -0.59272 | 0.132264 | -4.48135 | 1.99E-05 | 0.000369 | 0.524431 |
| ENSG0000 response | Inflamed | GSTA1     | protein_cc chr6  | 52656462 | 52668708 | - | 1019  | 236.358  | 0.038186 | 1.267063 | 0.282762 | 4.481024 | 2.00E-05 | 0.000369 | 0.525093 |
| ENSG0000 response | Inflamed | IGLV4-69  | IG_V_gene chr22  | 22385332 | 22385870 | + | 419   | 2909.463 | 0        | -1.39658 | 0.31169  | -4.48067 | 2.00E-05 | 0.000369 | 0.525812 |
| ENSG0000 response | Inflamed | RP11-80H8 | lincRNA chr3     | 1.43E+08 | 1.43E+08 | + | 746   | 8.649165 | 0.150358 | -0.83664 | 0.186797 | -4.47884 | 2.01E-05 | 0.000371 | 0.529565 |
| ENSG0000 response | Inflamed | NOL4      | protein_cc chr18 | 31431064 | 31804916 | - | 5687  | 12.04057 | 0.138425 | 1.112555 | 0.248435 | 4.478248 | 2.02E-05 | 0.000372 | 0.530797 |
| ENSG0000 response | Inflamed | GATA6     | protein_cc chr18 | 19749404 | 19782491 | + | 3945  | 2033.661 | 0        | 0.724391 | 0.161768 | 4.477965 | 2.02E-05 | 0.000372 | 0.531381 |
| ENSG0000 response | Inflamed | MST1L     | pseudoger chr1   | 17081405 | 17096732 | - | 5295  | 378.9618 | 0.009547 | 1.553797 | 0.346999 | 4.477807 | 2.02E-05 | 0.000372 | 0.531708 |
| ENSG0000 response | Inflamed | FICD      | protein_cc chr12 | 1.09E+08 | 1.09E+08 | + | 4267  | 571.0072 | 0        | -0.59892 | 0.133759 | -4.4776  | 2.02E-05 | 0.000372 | 0.532135 |
| ENSG0000 response | Inflamed | TMEM158   | protein_cc chr3  | 45265958 | 45267770 | - | 1813  | 535.1742 | 0.002387 | -1.0606  | 0.236909 | -4.47683 | 2.03E-05 | 0.000373 | 0.53373  |
| ENSG0000 response | Inflamed | RP11-483F | antisense chr16  | 83823572 | 83841439 | - | 1603  | 12.11695 | 0.019093 | -0.68062 | 0.152066 | -4.47582 | 2.04E-05 | 0.000374 | 0.535828 |
| ENSG0000 response | Inflamed | RASL10B   | protein_cc chr17 | 34058668 | 34070540 | + | 3502  | 36.87828 | 0.009547 | -1.14504 | 0.255871 | -4.47507 | 2.04E-05 | 0.000375 | 0.537404 |

|                   |          |                     |                  |          |          |   |       |          |          |          |          |          |          |          |          |
|-------------------|----------|---------------------|------------------|----------|----------|---|-------|----------|----------|----------|----------|----------|----------|----------|----------|
| ENSG0000 response | Inflamed | IGFBP7-AS antisense | chr4             | 57975928 | 58071676 | + | 1740  | 9.873508 | 0.062053 | -0.77341 | 0.172832 | -4.47494 | 2.05E-05 | 0.000375 | 0.537669 |
| ENSG0000 response | Inflamed | LRRC4               | protein_cc chr7  | 1.28E+08 | 1.28E+08 | - | 4036  | 98.13842 | 0.002387 | -1.16572 | 0.260594 | -4.47331 | 2.06E-05 | 0.000377 | 0.541087 |
| ENSG0000 response | Inflamed | AF165138            | protein_cc chr21 | 15964251 | 16031142 | - | 1889  | 1.792363 | 0.649165 | -0.66817 | 0.14937  | -4.47327 | 2.06E-05 | 0.000377 | 0.541182 |
| ENSG0000 response | Inflamed | LPCAT1              | protein_cc chr5  | 1456595  | 1524092  | - | 6494  | 4154.68  | 0        | -0.68427 | 0.152972 | -4.47318 | 2.06E-05 | 0.000377 | 0.541364 |
| ENSG0000 response | Inflamed | OLIG1               | protein_cc chr21 | 34442450 | 34444726 | + | 2277  | 35.39618 | 0.0358   | -1.17158 | 0.261946 | -4.47258 | 2.06E-05 | 0.000377 | 0.542625 |
| ENSG0000 response | Inflamed | DUSP8               | protein_cc chr11 | 1575274  | 1593150  | - | 4616  | 1430.2   | 0        | 0.644665 | 0.14415  | 4.472169 | 2.07E-05 | 0.000378 | 0.543499 |
| ENSG0000 response | Inflamed | IGLV2-14            | IG_V_gene chr22  | 23101189 | 23101707 | + | 402   | 37629.5  | 0        | -1.31918 | 0.295074 | -4.47068 | 2.08E-05 | 0.000379 | 0.546664 |
| ENSG0000 response | Inflamed | CDKN2B              | protein_cc chr9  | 22002902 | 22009362 | - | 4058  | 2655.298 | 0        | 1.061385 | 0.237415 | 4.470583 | 2.08E-05 | 0.000379 | 0.546861 |
| ENSG0000 response | Inflamed | MYO1D               | protein_cc chr17 | 30819540 | 31204195 | - | 7731  | 25977.47 | 0        | 0.656514 | 0.146855 | 4.470486 | 2.08E-05 | 0.000379 | 0.547066 |
| ENSG0000 response | Inflamed | CD4                 | protein_cc chr12 | 6896024  | 6929974  | + | 4583  | 4818.337 | 0        | -0.60581 | 0.135545 | -4.46941 | 2.09E-05 | 0.000381 | 0.549368 |
| ENSG0000 response | Inflamed | IGLV5-48            | IG_V_gene chr22  | 22707289 | 22707781 | + | 369   | 67.36993 | 0.026253 | -1.34141 | 0.300179 | -4.4687  | 2.10E-05 | 0.000381 | 0.550875 |
| ENSG0000 response | Inflamed | DOCK8               | protein_cc chr9  | 214854   | 465259   | + | 13782 | 2308.866 | 0        | -0.79481 | 0.177905 | -4.46762 | 2.10E-05 | 0.000383 | 0.553198 |
| ENSG0000 response | Inflamed | SLC25A34            | protein_cc chr1  | 16062900 | 16067891 | + | 3195  | 597.8926 | 0        | 0.930096 | 0.208227 | 4.466739 | 2.11E-05 | 0.000384 | 0.555092 |
| ENSG0000 response | Inflamed | CD82                | protein_cc chr11 | 44585977 | 44641913 | + | 4054  | 3403.126 | 0        | -0.70039 | 0.156818 | -4.4663  | 2.12E-05 | 0.000384 | 0.556045 |
| ENSG0000 response | Inflamed | HBD                 | protein_cc chr11 | 5253908  | 5256600  | - | 1062  | 8.539379 | 0.221957 | -1.01109 | 0.226401 | -4.46594 | 2.12E-05 | 0.000385 | 0.556818 |
| ENSG0000 response | Inflamed | RP11-536C           | lincRNA chr9     | 13446490 | 13487510 | + | 512   | 11.82578 | 0.238663 | -1.04793 | 0.234694 | -4.46508 | 2.13E-05 | 0.000385 | 0.558689 |
| ENSG0000 response | Inflamed | CCDC134             | protein_cc chr22 | 42196683 | 42222303 | + | 1270  | 231.3484 | 0        | -0.36714 | 0.082228 | -4.46495 | 2.13E-05 | 0.000385 | 0.558975 |
| ENSG0000 response | Inflamed | RHOQ                | protein_cc chr2  | 46768945 | 46810260 | + | 4619  | 1328.525 | 0        | -0.83761 | 0.187622 | -4.46435 | 2.13E-05 | 0.000386 | 0.560277 |
| ENSG0000 response | Inflamed | CNNM4               | protein_cc chr2  | 97426639 | 97477628 | + | 5198  | 9152.072 | 0        | 0.746855 | 0.167295 | 4.464299 | 2.13E-05 | 0.000386 | 0.56038  |
| ENSG0000 response | Inflamed | ANKRD9              | protein_cc chr14 | 1.03E+08 | 1.03E+08 | - | 2133  | 1612.012 | 0        | 0.565545 | 0.12669  | 4.463996 | 2.13E-05 | 0.000386 | 0.561039 |
| ENSG0000 response | Inflamed | IL13                | protein_cc chr5  | 1.32E+08 | 1.32E+08 | + | 2887  | 6.26969  | 0.472554 | -1.02829 | 0.230419 | -4.4627  | 2.14E-05 | 0.000388 | 0.56388  |
| ENSG0000 response | Inflamed | RP11-175k           | lincRNA chr5     | 1.59E+08 | 1.59E+08 | + | 3214  | 22.50358 | 0.023866 | -0.93295 | 0.209069 | -4.46243 | 2.15E-05 | 0.000388 | 0.564457 |
| ENSG0000 response | Inflamed | CYSLTR1             | protein_cc chrX  | 77526961 | 77583048 | - | 5431  | 152.9117 | 0        | -0.81523 | 0.182747 | -4.46094 | 2.16E-05 | 0.00039  | 0.56774  |
| ENSG0000 response | Inflamed | FHL5                | protein_cc chr6  | 97010424 | 97064512 | + | 2135  | 24.31742 | 0.023866 | -0.83015 | 0.186152 | -4.45954 | 2.17E-05 | 0.000392 | 0.57084  |
| ENSG0000 response | Inflamed | RP11-500C           | antisense chr6   | 17706488 | 17707575 | + | 1088  | 40.0358  | 0        | -0.66454 | 0.149052 | -4.45847 | 2.18E-05 | 0.000393 | 0.573213 |
| ENSG0000 response | Inflamed | C9orf116            | protein_cc chr9  | 1.38E+08 | 1.38E+08 | - | 1864  | 43.05012 | 0        | -0.68713 | 0.154129 | -4.45811 | 2.18E-05 | 0.000393 | 0.574002 |
| ENSG0000 response | Inflamed | SYNPR-AS1           | antisense chr3   | 63409272 | 63535727 | - | 558   | 8.97136  | 0.081146 | 0.749726 | 0.16818  | 4.457866 | 2.19E-05 | 0.000394 | 0.574555 |
| ENSG0000 response | Inflamed | RP4-800J2           | antisense chr20  | 55959216 | 55968118 | - | 1540  | 6.470167 | 0.167064 | -0.76845 | 0.172389 | -4.45763 | 2.19E-05 | 0.000394 | 0.575077 |
| ENSG0000 response | Inflamed | VSIG2               | protein_cc chr11 | 1.25E+08 | 1.25E+08 | - | 1432  | 4622.332 | 0        | 0.985737 | 0.221222 | 4.455864 | 2.20E-05 | 0.000396 | 0.579036 |
| ENSG0000 response | Inflamed | SHMT2               | protein_cc chr12 | 57623110 | 57628718 | + | 4838  | 2811.819 | 0        | -0.38584 | 0.08665  | -4.45292 | 2.23E-05 | 0.0004   | 0.585679 |
| ENSG0000 response | Inflamed | AC011523            | antisense chr19  | 51333786 | 51354345 | + | 392   | 16.55131 | 0.093079 | 0.96789  | 0.217382 | 4.452475 | 2.23E-05 | 0.000401 | 0.586699 |
| ENSG0000 response | Inflamed | RP11-326F           | antisense chr9   | 33166973 | 33179981 | + | 843   | 45.66348 | 0        | 0.624074 | 0.140219 | 4.450726 | 2.25E-05 | 0.000403 | 0.590692 |
| ENSG0000 response | Inflamed | RAB31               | protein_cc chr18 | 9708162  | 9862548  | + | 5586  | 1963.344 | 0        | -0.91066 | 0.20462  | -4.45048 | 2.25E-05 | 0.000403 | 0.591246 |
| ENSG0000 response | Inflamed | AF064860            | lincRNA chr21    | 41099682 | 41102607 | + | 1786  | 9.77327  | 0.214797 | 1.170498 | 0.263036 | 4.449953 | 2.25E-05 | 0.000404 | 0.592465 |
| ENSG0000 response | Inflamed | C1orf200            | protein_cc chr1  | 9712668  | 9714644  | - | 1823  | 5.105012 | 0.231504 | -0.71152 | 0.159946 | -4.44849 | 2.27E-05 | 0.000406 | 0.595846 |
| ENSG0000 response | Inflamed | C1orf21             | protein_cc chr1  | 1.84E+08 | 1.85E+08 | + | 10971 | 2657.248 | 0        | 0.52095  | 0.117117 | 4.44811  | 2.27E-05 | 0.000406 | 0.596714 |
| ENSG0000 response | Inflamed | ENTPD8              | protein_cc chr9  | 1.4E+08  | 1.4E+08  | - | 2836  | 3463.232 | 0        | 1.211451 | 0.272375 | 4.447734 | 2.27E-05 | 0.000406 | 0.597582 |
| ENSG0000 response | Inflamed | RP11-168k           | lincRNA chr9     | 1.16E+08 | 1.16E+08 | + | 3043  | 2.665871 | 0.622912 | -0.87635 | 0.197038 | -4.44761 | 2.27E-05 | 0.000406 | 0.597867 |
| ENSG0000 response | Inflamed | ZNF503-A            | processed chr10  | 77160759 | 77168738 | + | 3864  | 45.5179  | 0        | -0.60239 | 0.135457 | -4.44709 | 2.28E-05 | 0.000407 | 0.599087 |
| ENSG0000 response | Inflamed | BOLA3-AS            | antisense chr2   | 74375136 | 74377188 | + | 1834  | 41.42721 | 0        | -0.54853 | 0.123376 | -4.44603 | 2.29E-05 | 0.000408 | 0.601543 |

|                   |          |           |                  |          |          |   |       |          |          |          |          |          |          |          |          |
|-------------------|----------|-----------|------------------|----------|----------|---|-------|----------|----------|----------|----------|----------|----------|----------|----------|
| ENSG0000 response | Inflamed | DKFZP761  | protein_cc chr19 | 11466062 | 11476374 | + | 3273  | 693.0692 | 0        | -0.69149 | 0.155531 | -4.44601 | 2.29E-05 | 0.000408 | 0.601583 |
| ENSG0000 response | Inflamed | STEAP4    | protein_cc chr7  | 87905744 | 87936206 | - | 5708  | 462.6468 | 0.004773 | -1.27784 | 0.28749  | -4.4448  | 2.30E-05 | 0.00041  | 0.604405 |
| ENSG0000 response | Inflamed | PNRC1     | protein_cc chr6  | 89790470 | 89794879 | + | 2992  | 3547.723 | 0        | -0.48216 | 0.108498 | -4.444   | 2.31E-05 | 0.000411 | 0.606296 |
| ENSG0000 response | Inflamed | DPF1      | protein_cc chr19 | 38701646 | 38720354 | - | 4800  | 4.107399 | 0.334129 | -0.80841 | 0.181947 | -4.44313 | 2.31E-05 | 0.000412 | 0.608347 |
| ENSG0000 response | Inflamed | C9orf152  | protein_cc chr9  | 1.13E+08 | 1.13E+08 | - | 2947  | 2957.513 | 0        | 1.012683 | 0.227949 | 4.442589 | 2.32E-05 | 0.000412 | 0.609616 |
| ENSG0000 response | Inflamed | PAX6      | protein_cc chr11 | 31806340 | 31839509 | - | 14776 | 22.70167 | 0.054893 | 1.070103 | 0.240889 | 4.442311 | 2.32E-05 | 0.000412 | 0.610272 |
| ENSG0000 response | Inflamed | MMP2      | protein_cc chr16 | 55423612 | 55540603 | + | 4933  | 20124.88 | 0        | -0.95788 | 0.215629 | -4.44225 | 2.32E-05 | 0.000412 | 0.610422 |
| ENSG0000 response | Inflamed | P2RY13    | protein_cc chr3  | 1.51E+08 | 1.51E+08 | - | 2764  | 433.2673 | 0        | -0.95364 | 0.21469  | -4.44194 | 2.32E-05 | 0.000413 | 0.611154 |
| ENSG0000 response | Inflamed | B3GALNT1  | protein_cc chr3  | 1.61E+08 | 1.61E+08 | - | 4183  | 69.08592 | 0.011933 | -0.84813 | 0.190984 | -4.44085 | 2.33E-05 | 0.000414 | 0.613734 |
| ENSG0000 response | Inflamed | AC004988  | antisense chr7   | 40577726 | 40586527 | - | 1771  | 1.890215 | 0.632458 | -0.73373 | 0.165283 | -4.43927 | 2.35E-05 | 0.000416 | 0.617509 |
| ENSG0000 response | Inflamed | LA16c-321 | antisense chr16  | 2989715  | 3004277  | - | 510   | 18.95704 | 0.050119 | 0.964581 | 0.21732  | 4.438525 | 2.36E-05 | 0.000417 | 0.619286 |
| ENSG0000 response | Inflamed | IGHE      | IG_C_gene chr14  | 1.06E+08 | 1.06E+08 | - | 1543  | 55.26969 | 0.016706 | -1.11568 | 0.251402 | -4.43784 | 2.36E-05 | 0.000418 | 0.620936 |
| ENSG0000 response | Inflamed | IGLV3-24  | IG_V_pseu chr22  | 23036924 | 23037437 | + | 197   | 7.229117 | 0.329356 | -0.97237 | 0.219199 | -4.43603 | 2.38E-05 | 0.000421 | 0.625294 |
| ENSG0000 response | Inflamed | TSPAN6    | protein_cc chrX  | 99883667 | 99894988 | - | 2968  | 1550.253 | 0        | 0.653216 | 0.147318 | 4.434068 | 2.40E-05 | 0.000424 | 0.630062 |
| ENSG0000 response | Inflamed | FTLP3     | pseudoger chr20  | 4004552  | 4005091  | + | 540   | 181.7661 | 0        | -0.59851 | 0.135002 | -4.43331 | 2.40E-05 | 0.000425 | 0.631921 |
| ENSG0000 response | Inflamed | REM1      | protein_cc chr20 | 30063096 | 30072708 | + | 1665  | 118.673  | 0        | -0.87097 | 0.196481 | -4.43282 | 2.41E-05 | 0.000425 | 0.633117 |
| ENSG0000 response | Inflamed | FAM189A1  | protein_cc chr15 | 29412457 | 29862927 | - | 5545  | 353.1599 | 0.004773 | 1.6947   | 0.382437 | 4.431316 | 2.42E-05 | 0.000427 | 0.636805 |
| ENSG0000 response | Inflamed | IGKV6D-21 | IG_V_gene chr2   | 90060377 | 90060995 | + | 409   | 393.3699 | 0.004773 | -1.44873 | 0.326957 | -4.43095 | 2.43E-05 | 0.000428 | 0.63771  |
| ENSG0000 response | Inflamed | ABI3      | protein_cc chr17 | 47287589 | 47300587 | + | 2456  | 1026.029 | 0        | -0.52063 | 0.117504 | -4.43076 | 2.43E-05 | 0.000428 | 0.638177 |
| ENSG0000 response | Inflamed | RNF24     | protein_cc chr20 | 3907956  | 3996229  | - | 7668  | 1625.461 | 0        | -0.68173 | 0.153916 | -4.42919 | 2.44E-05 | 0.00043  | 0.642059 |
| ENSG0000 response | Inflamed | THBD      | protein_cc chr20 | 23026270 | 23030378 | - | 4109  | 1355.866 | 0        | -0.91157 | 0.205831 | -4.42873 | 2.45E-05 | 0.00043  | 0.643211 |
| ENSG0000 response | Inflamed | CENPV     | protein_cc chr17 | 16245848 | 16256970 | - | 2302  | 919.9833 | 0        | 0.628537 | 0.141925 | 4.428647 | 2.45E-05 | 0.00043  | 0.643413 |
| ENSG0000 response | Inflamed | RP13-497k | antisense chr4   | 23781213 | 23784183 | + | 442   | 24.53699 | 0.23389  | 1.436855 | 0.32445  | 4.428586 | 2.45E-05 | 0.00043  | 0.643564 |
| ENSG0000 response | Inflamed | AP000783  | protein_cc chr11 | 1.23E+08 | 1.23E+08 | + | 1103  | 16.31504 | 0.011933 | -0.69158 | 0.156184 | -4.42802 | 2.45E-05 | 0.000431 | 0.644976 |
| ENSG0000 response | Inflamed | SAA1      | protein_cc chr11 | 18287721 | 18291524 | + | 765   | 545.8831 | 0.052506 | -2.38446 | 0.53855  | -4.42755 | 2.46E-05 | 0.000431 | 0.646136 |
| ENSG0000 response | Inflamed | ZNF469    | protein_cc chr16 | 88493879 | 88507165 | + | 13287 | 537.9976 | 0.002387 | -1.2429  | 0.280814 | -4.42607 | 2.47E-05 | 0.000434 | 0.64986  |
| ENSG0000 response | Inflamed | GNB5      | protein_cc chr15 | 52413117 | 52483566 | - | 7487  | 444.6492 | 0        | -0.55523 | 0.125461 | -4.42554 | 2.48E-05 | 0.000434 | 0.651178 |
| ENSG0000 response | Inflamed | RENBP     | protein_cc chrX  | 1.53E+08 | 1.53E+08 | - | 2146  | 345.1408 | 0        | -0.51692 | 0.116826 | -4.42471 | 2.48E-05 | 0.000435 | 0.653283 |
| ENSG0000 response | Inflamed | LTK       | protein_cc chr15 | 41795836 | 41806085 | - | 3490  | 556.4845 | 0        | 0.532825 | 0.120439 | 4.424029 | 2.49E-05 | 0.000436 | 0.654999 |
| ENSG0000 response | Inflamed | KIAA1984  | protein_cc chr9  | 1.4E+08  | 1.4E+08  | + | 2964  | 55.90931 | 0        | 0.764163 | 0.172754 | 4.423421 | 2.50E-05 | 0.000437 | 0.656539 |
| ENSG0000 response | Inflamed | PITPNC1   | protein_cc chr17 | 65373575 | 65693372 | + | 7642  | 1173.117 | 0        | -0.52169 | 0.117966 | -4.42242 | 2.51E-05 | 0.000438 | 0.659071 |
| ENSG0000 response | Inflamed | KIRREL2   | protein_cc chr19 | 36346763 | 36358011 | + | 3382  | 18.90692 | 0.081146 | -0.95674 | 0.216358 | -4.42201 | 2.51E-05 | 0.000439 | 0.660127 |
| ENSG0000 response | Inflamed | CDX1      | protein_cc chr5  | 1.5E+08  | 1.5E+08  | + | 1757  | 9246.869 | 0        | 0.887873 | 0.200834 | 4.420924 | 2.52E-05 | 0.00044  | 0.662903 |
| ENSG0000 response | Inflamed | CALN1     | protein_cc chr7  | 71244476 | 71912136 | - | 10029 | 4.494033 | 0.587112 | 1.101204 | 0.249108 | 4.420594 | 2.52E-05 | 0.00044  | 0.663749 |
| ENSG0000 response | Inflamed | KLB       | protein_cc chr4  | 39408473 | 39453156 | + | 6082  | 56.53222 | 0.019093 | 1.151529 | 0.260503 | 4.420406 | 2.53E-05 | 0.00044  | 0.664231 |
| ENSG0000 response | Inflamed | LTBP2     | protein_cc chr14 | 74964873 | 75079306 | - | 9310  | 2225.384 | 0        | -1.14372 | 0.258754 | -4.42011 | 2.53E-05 | 0.000441 | 0.664996 |
| ENSG0000 response | Inflamed | SLC3A2    | protein_cc chr11 | 62623518 | 62656352 | + | 5239  | 3422.721 | 0        | -0.36505 | 0.082593 | -4.41988 | 2.53E-05 | 0.000441 | 0.665591 |
| ENSG0000 response | Inflamed | RP11-74E2 | antisense chr17  | 2615603  | 2616127  | + | 443   | 29.91885 | 0.016706 | 0.63306  | 0.143254 | 4.419142 | 2.54E-05 | 0.000442 | 0.667481 |
| ENSG0000 response | Inflamed | GPR119    | protein_cc chrX  | 1.3E+08  | 1.3E+08  | - | 1193  | 5.116945 | 0.291169 | 0.860457 | 0.194741 | 4.418478 | 2.55E-05 | 0.000442 | 0.669195 |
| ENSG0000 response | Inflamed | CHDH      | protein_cc chr3  | 53846362 | 53880417 | - | 7758  | 1929.957 | 0        | 0.737825 | 0.166988 | 4.41842  | 2.55E-05 | 0.000442 | 0.669346 |

|                   |          |           |                  |          |          |   |       |          |          |          |          |          |          |          |          |
|-------------------|----------|-----------|------------------|----------|----------|---|-------|----------|----------|----------|----------|----------|----------|----------|----------|
| ENSG0000 response | Inflamed | OMP       | protein_cc chr11 | 76813886 | 76814377 | + | 492   | 36.95704 | 0.02148  | 0.826971 | 0.187187 | 4.417896 | 2.55E-05 | 0.000443 | 0.670699 |
| ENSG0000 response | Inflamed | CTC-378H2 | antisense chr19  | 42636707 | 42641251 | + | 897   | 11.27446 | 0.069212 | -0.78405 | 0.177518 | -4.41675 | 2.56E-05 | 0.000445 | 0.673673 |
| ENSG0000 response | Inflamed | NAPA-AS1  | antisense chr19  | 47987539 | 48004854 | + | 1894  | 105.3484 | 0        | -0.58554 | 0.132584 | -4.4164  | 2.57E-05 | 0.000445 | 0.674594 |
| ENSG0000 response | Inflamed | PHGDH     | protein_cc chr1  | 1.2E+08  | 1.2E+08  | + | 5622  | 488.2745 | 0        | -0.84865 | 0.192227 | -4.41482 | 2.58E-05 | 0.000447 | 0.678716 |
| ENSG0000 response | Inflamed | FUZ       | protein_cc chr19 | 50310126 | 50320633 | - | 2951  | 292.4129 | 0        | -0.42988 | 0.097395 | -4.41375 | 2.59E-05 | 0.000449 | 0.681529 |
| ENSG0000 response | Inflamed | VWFP1     | pseudoger chr22  | 17170993 | 17185367 | - | 2907  | 43.98329 | 0.107399 | -1.13051 | 0.256144 | -4.41359 | 2.59E-05 | 0.000449 | 0.681949 |
| ENSG0000 response | Inflamed | SRI       | protein_cc chr7  | 87834433 | 87856308 | - | 4237  | 6984.547 | 0        | 0.575658 | 0.130441 | 4.413186 | 2.60E-05 | 0.000449 | 0.683005 |
| ENSG0000 response | Inflamed | SLC46A2   | protein_cc chr9  | 1.16E+08 | 1.16E+08 | - | 2502  | 9.50358  | 0.169451 | -0.87855 | 0.19908  | -4.41304 | 2.60E-05 | 0.000449 | 0.683385 |
| ENSG0000 response | Inflamed | LLGL2     | protein_cc chr17 | 73521161 | 73571289 | + | 7909  | 12768.12 | 0        | 0.673937 | 0.15282  | 4.409993 | 2.63E-05 | 0.000454 | 0.69147  |
| ENSG0000 response | Inflamed | RP11-303E | antisense chr16  | 81103459 | 81110203 | + | 496   | 1.088305 | 0.770883 | -0.54644 | 0.123922 | -4.40955 | 2.63E-05 | 0.000455 | 0.692643 |
| ENSG0000 response | Inflamed | CD19      | protein_cc chr16 | 28943260 | 28950667 | + | 2711  | 686.9379 | 0        | -1.37413 | 0.311629 | -4.4095  | 2.64E-05 | 0.000455 | 0.692786 |
| ENSG0000 response | Inflamed | LL22NC03  | protein_cc chr22 | 47857048 | 47882860 | - | 1090  | 8.315036 | 0.200477 | 0.981877 | 0.222736 | 4.408259 | 2.65E-05 | 0.000456 | 0.696108 |
| ENSG0000 response | Inflamed | C3        | protein_cc chr19 | 6677715  | 6730573  | - | 8328  | 15841.01 | 0        | -1.35772 | 0.308021 | -4.40789 | 2.65E-05 | 0.000457 | 0.697094 |
| ENSG0000 response | Inflamed | RP11-498E | sense_intr chr9  | 1.25E+08 | 1.25E+08 | + | 221   | 11.42243 | 0.057279 | -0.66348 | 0.150586 | -4.40596 | 2.67E-05 | 0.00046  | 0.702304 |
| ENSG0000 response | Inflamed | FADS2     | protein_cc chr11 | 61560452 | 61634826 | + | 11026 | 2340.716 | 0        | -1.25014 | 0.283747 | -4.40583 | 2.67E-05 | 0.00046  | 0.702652 |
| ENSG0000 response | Inflamed | CCDC88A   | protein_cc chr2  | 55514978 | 55647057 | - | 14537 | 471.5203 | 0        | -0.99055 | 0.224837 | -4.40564 | 2.67E-05 | 0.00046  | 0.703162 |
| ENSG0000 response | Inflamed | KCNK9     | protein_cc chr8  | 1.41E+08 | 1.41E+08 | - | 4449  | 11.75895 | 0.315036 | -1.2392  | 0.281276 | -4.40563 | 2.67E-05 | 0.00046  | 0.703188 |
| ENSG0000 response | Inflamed | CHRD      | protein_cc chr3  | 1.84E+08 | 1.84E+08 | + | 6620  | 309.895  | 0        | -0.85944 | 0.19512  | -4.40468 | 2.68E-05 | 0.000461 | 0.705773 |
| ENSG0000 response | Inflamed | ZYG11A    | protein_cc chr1  | 53308183 | 53360670 | + | 4694  | 15.58234 | 0.107399 | -0.96698 | 0.21959  | -4.40356 | 2.70E-05 | 0.000463 | 0.708846 |
| ENSG0000 response | Inflamed | NAGK      | protein_cc chr2  | 71291474 | 71306935 | + | 8894  | 2346.561 | 0        | -0.35717 | 0.081118 | -4.4031  | 2.70E-05 | 0.000463 | 0.710085 |
| ENSG0000 response | Inflamed | RP11-102M | lincRNA chr4     | 1.42E+08 | 1.42E+08 | + | 1394  | 16.53222 | 0.016706 | -0.74713 | 0.169695 | -4.40278 | 2.70E-05 | 0.000463 | 0.710958 |
| ENSG0000 response | Inflamed | ELK3      | protein_cc chr12 | 96588160 | 96663613 | + | 4648  | 1385.322 | 0        | -0.82721 | 0.187916 | -4.40201 | 2.71E-05 | 0.000465 | 0.713069 |
| ENSG0000 response | Inflamed | TMEM163   | protein_cc chr2  | 1.35E+08 | 1.35E+08 | - | 6804  | 173.3461 | 0.011933 | -1.4883  | 0.338133 | -4.40152 | 2.72E-05 | 0.000465 | 0.714426 |
| ENSG0000 response | Inflamed | NR2F6     | protein_cc chr19 | 17342692 | 17356749 | - | 2676  | 4560.768 | 0        | 0.469717 | 0.106725 | 4.401208 | 2.72E-05 | 0.000465 | 0.715286 |
| ENSG0000 response | Inflamed | RP11-524I | antisense chrX   | 99928327 | 99928978 | + | 652   | 24.16706 | 0.052506 | -0.86612 | 0.196801 | -4.40096 | 2.72E-05 | 0.000466 | 0.715969 |
| ENSG0000 response | Inflamed | TRIM10    | protein_cc chr6  | 30119722 | 30128711 | - | 3546  | 304.9952 | 0.00716  | 0.942959 | 0.214277 | 4.400665 | 2.73E-05 | 0.000466 | 0.716782 |
| ENSG0000 response | Inflamed | KCNK10    | protein_cc chr14 | 88649113 | 88793251 | - | 5592  | 121.031  | 0.004773 | 0.9962   | 0.226395 | 4.400277 | 2.73E-05 | 0.000466 | 0.717855 |
| ENSG0000 response | Inflamed | SLAMF6    | protein_cc chr1  | 1.6E+08  | 1.6E+08  | - | 2746  | 480.3461 | 0        | -0.90384 | 0.205408 | -4.40021 | 2.73E-05 | 0.000466 | 0.718042 |
| ENSG0000 response | Inflamed | CCL17     | protein_cc chr16 | 57438679 | 57449974 | + | 615   | 25.21002 | 0.147971 | -1.17238 | 0.266443 | -4.40012 | 2.73E-05 | 0.000466 | 0.718276 |
| ENSG0000 response | Inflamed | HOMER2    | protein_cc chr15 | 83509838 | 83654661 | - | 10067 | 72       | 0.002387 | -0.74008 | 0.168217 | -4.39954 | 2.74E-05 | 0.000467 | 0.719902 |
| ENSG0000 response | Inflamed | GYG1      | protein_cc chr3  | 1.49E+08 | 1.49E+08 | + | 3475  | 1042.988 | 0        | -0.42009 | 0.095493 | -4.39916 | 2.74E-05 | 0.000467 | 0.720955 |
| ENSG0000 response | Inflamed | ADRA2C    | protein_cc chr4  | 3768075  | 3770251  | + | 2177  | 63.44869 | 0.00716  | -0.9801  | 0.222804 | -4.39894 | 2.74E-05 | 0.000467 | 0.721562 |
| ENSG0000 response | Inflamed | CETP      | protein_cc chr16 | 56995762 | 57017757 | + | 2085  | 75.50835 | 0.00716  | -1.00153 | 0.227717 | -4.39817 | 2.75E-05 | 0.000468 | 0.723717 |
| ENSG0000 response | Inflamed | RP11-20D  | lincRNA chr12    | 8940853  | 8948385  | + | 2279  | 11.51074 | 0.126492 | -0.80526 | 0.18309  | -4.39815 | 2.75E-05 | 0.000468 | 0.723757 |
| ENSG0000 response | Inflamed | LAMP5     | protein_cc chr20 | 9495005  | 9511171  | + | 2042  | 97.63962 | 0        | -0.87877 | 0.199816 | -4.39788 | 2.76E-05 | 0.000468 | 0.724506 |
| ENSG0000 response | Inflamed | MIR4489   | miRNA chr11      | 65416663 | 65416724 | + | 62    | 3.26253  | 0.393795 | -0.67884 | 0.15438  | -4.39721 | 2.76E-05 | 0.000468 | 0.726384 |
| ENSG0000 response | Inflamed | CD55      | protein_cc chr1  | 2.07E+08 | 2.08E+08 | + | 4477  | 7389.764 | 0        | -0.99458 | 0.226186 | -4.39719 | 2.76E-05 | 0.000468 | 0.726431 |
| ENSG0000 response | Inflamed | GRK5      | protein_cc chr10 | 1.21E+08 | 1.21E+08 | + | 2949  | 1715.845 | 0        | -0.60309 | 0.137156 | -4.39712 | 2.76E-05 | 0.000468 | 0.726634 |
| ENSG0000 response | Inflamed | NEFH      | protein_cc chr22 | 29876219 | 29887379 | + | 3783  | 47.95943 | 0.011933 | -0.91514 | 0.208146 | -4.39664 | 2.77E-05 | 0.000469 | 0.727986 |
| ENSG0000 response | Inflamed | KCND1     | protein_cc chrX  | 48818639 | 48827976 | - | 5807  | 201.8186 | 0.002387 | -0.72359 | 0.16459  | -4.39633 | 2.77E-05 | 0.000469 | 0.728836 |



|                   |          |           |                  |          |          |   |       |          |          |          |          |          |          |          |          |
|-------------------|----------|-----------|------------------|----------|----------|---|-------|----------|----------|----------|----------|----------|----------|----------|----------|
| ENSG0000 response | Inflamed | CD27      | protein_cc chr12 | 6554033  | 6560884  | + | 1410  | 1430.06  | 0        | -1.00378 | 0.228324 | -4.39629 | 2.77E-05 | 0.000469 | 0.728967 |
| ENSG0000 response | Inflamed | RGS18     | protein_cc chr1  | 1.92E+08 | 1.92E+08 | + | 2806  | 119.1599 | 0        | -0.8275  | 0.188241 | -4.39597 | 2.78E-05 | 0.000469 | 0.729863 |
| ENSG0000 response | Inflamed | PTPRCAP   | protein_cc chr11 | 67202981 | 67205538 | - | 1292  | 1574.029 | 0        | -0.77762 | 0.176903 | -4.39574 | 2.78E-05 | 0.000469 | 0.730504 |
| ENSG0000 response | Inflamed | CYYR1     | protein_cc chr21 | 27838528 | 27945603 | - | 3436  | 435.9212 | 0        | -0.77022 | 0.175278 | -4.39424 | 2.79E-05 | 0.000472 | 0.734723 |
| ENSG0000 response | Inflamed | CTC-5580  | antisense chr5   | 1.68E+08 | 1.68E+08 | + | 810   | 6.109785 | 0.295943 | 0.755653 | 0.171968 | 4.394136 | 2.80E-05 | 0.000472 | 0.735031 |
| ENSG0000 response | Inflamed | RP11-18B1 | lincRNA chr9     | 1.16E+08 | 1.16E+08 | + | 1223  | 5.02864  | 0.529833 | -1.12106 | 0.255171 | -4.39339 | 2.80E-05 | 0.000473 | 0.737132 |
| ENSG0000 response | Inflamed | SERPINF2  | protein_cc chr17 | 1646130  | 1658562  | + | 2348  | 170.5847 | 0        | -0.65642 | 0.149417 | -4.39317 | 2.81E-05 | 0.000473 | 0.737769 |
| ENSG0000 response | Inflamed | GREB1     | protein_cc chr2  | 11674242 | 11782914 | + | 12320 | 129.4057 | 0.01432  | -0.98289 | 0.223769 | -4.39241 | 2.81E-05 | 0.000474 | 0.739935 |
| ENSG0000 response | Inflamed | MS4A8     | protein_cc chr11 | 60467047 | 60483284 | + | 2583  | 592.1957 | 0.00716  | 1.125426 | 0.256237 | 4.392124 | 2.82E-05 | 0.000474 | 0.740742 |
| ENSG0000 response | Inflamed | CXCL13    | protein_cc chr4  | 78432907 | 78532988 | + | 1431  | 976.1026 | 0.031026 | -1.98609 | 0.452312 | -4.39097 | 2.83E-05 | 0.000476 | 0.744034 |
| ENSG0000 response | Inflamed | C6orf222  | protein_cc chr6  | 36283534 | 36304662 | - | 3736  | 807.4702 | 0        | 0.998091 | 0.227307 | 4.390945 | 2.83E-05 | 0.000476 | 0.744112 |
| ENSG0000 response | Inflamed | ELFN1     | protein_cc chr7  | 1727755  | 1787590  | + | 3845  | 89.04057 | 0.019093 | -1.15952 | 0.264135 | -4.3899  | 2.84E-05 | 0.000477 | 0.747106 |
| ENSG0000 response | Inflamed | PRRG2     | protein_cc chr19 | 50083903 | 50094272 | + | 1701  | 447.432  | 0        | 0.544072 | 0.123974 | 4.388604 | 2.86E-05 | 0.000479 | 0.75084  |
| ENSG0000 response | Inflamed | C1S       | protein_cc chr12 | 7096351  | 7178336  | + | 6389  | 13977.73 | 0        | -0.90944 | 0.207233 | -4.38849 | 2.86E-05 | 0.000479 | 0.751156 |
| ENSG0000 response | Inflamed | TPTE2     | protein_cc chr13 | 19997017 | 20110903 | - | 2288  | 12.97375 | 0.131265 | -1.03025 | 0.234827 | -4.38728 | 2.87E-05 | 0.000481 | 0.754684 |
| ENSG0000 response | Inflamed | CTC-265F1 | sense_intr chr19 | 2610153  | 2611860  | - | 1708  | 1.214797 | 0.682578 | -0.48361 | 0.110235 | -4.38704 | 2.87E-05 | 0.000481 | 0.755373 |
| ENSG0000 response | Inflamed | RP4-728D  | antisense chr1   | 36035414 | 36043330 | - | 1030  | 26.73986 | 0.011933 | -0.77744 | 0.17724  | -4.38638 | 2.88E-05 | 0.000482 | 0.757284 |
| ENSG0000 response | Inflamed | RP11-531  | lincRNA chr11    | 15593569 | 15643937 | - | 465   | 3.128878 | 0.665871 | -0.88628 | 0.2021   | -4.38536 | 2.89E-05 | 0.000484 | 0.760269 |
| ENSG0000 response | Inflamed | FOXD2     | protein_cc chr1  | 47901689 | 47906363 | + | 4675  | 859.6158 | 0        | 0.937329 | 0.213805 | 4.384041 | 2.91E-05 | 0.000486 | 0.764128 |
| ENSG0000 response | Inflamed | CH17-132  | protein_cc chr2  | 90458201 | 90458671 | + | 347   | 4.176611 | 0.460621 | -1.05278 | 0.240175 | -4.38338 | 2.91E-05 | 0.000487 | 0.76607  |
| ENSG0000 response | Inflamed | ITPRIP    | protein_cc chr10 | 1.06E+08 | 1.06E+08 | - | 4588  | 1131.124 | 0        | -0.76713 | 0.17501  | -4.38335 | 2.91E-05 | 0.000487 | 0.766162 |
| ENSG0000 response | Inflamed | CYBA      | protein_cc chr16 | 88709691 | 88717560 | - | 3357  | 9033.723 | 0        | -0.48833 | 0.111408 | -4.38327 | 2.92E-05 | 0.000487 | 0.766398 |
| ENSG0000 response | Inflamed | COL23A1   | protein_cc chr5  | 1.78E+08 | 1.78E+08 | - | 3878  | 398.6038 | 0        | -0.83977 | 0.191602 | -4.38287 | 2.92E-05 | 0.000487 | 0.767569 |
| ENSG0000 response | Inflamed | MIR192    | miRNA chr11      | 64658609 | 64658718 | - | 110   | 100.8043 | 0.009547 | 1.009497 | 0.230348 | 4.38249  | 2.92E-05 | 0.000487 | 0.768698 |
| ENSG0000 response | Inflamed | GDF11     | protein_cc chr12 | 56137064 | 56150911 | + | 3846  | 323.6659 | 0        | -0.57764 | 0.131807 | -4.38246 | 2.92E-05 | 0.000487 | 0.768771 |
| ENSG0000 response | Inflamed | GTSF1     | protein_cc chr12 | 54849734 | 54867386 | - | 2524  | 21.24582 | 0.01432  | -0.75328 | 0.171896 | -4.38217 | 2.93E-05 | 0.000487 | 0.769642 |
| ENSG0000 response | Inflamed | UNC13D    | protein_cc chr17 | 73823306 | 73840798 | - | 7752  | 4544.162 | 0        | -0.632   | 0.144243 | -4.38145 | 2.94E-05 | 0.000488 | 0.771766 |
| ENSG0000 response | Inflamed | KRT80     | protein_cc chr12 | 52562780 | 52585784 | - | 4350  | 142.3675 | 0.009547 | -1.40489 | 0.320706 | -4.38062 | 2.95E-05 | 0.00049  | 0.774252 |
| ENSG0000 response | Inflamed | TM6SF1    | protein_cc chr15 | 83776159 | 83813606 | + | 2674  | 102.9952 | 0.002387 | -0.64806 | 0.147948 | -4.38031 | 2.95E-05 | 0.00049  | 0.775161 |
| ENSG0000 response | Inflamed | MAP3K3    | protein_cc chr17 | 61699775 | 61773663 | + | 6107  | 1864.823 | 0        | -0.54178 | 0.12372  | -4.3791  | 2.96E-05 | 0.000492 | 0.778768 |
| ENSG0000 response | Inflamed | CTB-83J4  | lincRNA chr19    | 55100906 | 55101752 | + | 847   | 2.902148 | 0.553699 | -0.8082  | 0.184562 | -4.37903 | 2.96E-05 | 0.000492 | 0.778984 |
| ENSG0000 response | Inflamed | VSIG1     | protein_cc chrX  | 1.07E+08 | 1.07E+08 | + | 3769  | 223.7422 | 0.045346 | -1.84174 | 0.420752 | -4.37726 | 2.98E-05 | 0.000495 | 0.78429  |
| ENSG0000 response | Inflamed | UBASH3B   | protein_cc chr11 | 1.23E+08 | 1.23E+08 | + | 9011  | 430.5776 | 0        | -0.6125  | 0.139973 | -4.37588 | 3.00E-05 | 0.000497 | 0.788474 |
| ENSG0000 response | Inflamed | KRT16     | protein_cc chr17 | 39766030 | 39772151 | - | 2475  | 80.31026 | 0.365155 | -2.20909 | 0.504917 | -4.37516 | 3.01E-05 | 0.000498 | 0.790644 |
| ENSG0000 response | Inflamed | RP11-511  | antisense chr1   | 47846600 | 47874149 | - | 483   | 16.01909 | 0.155131 | 0.900144 | 0.20577  | 4.374517 | 3.01E-05 | 0.000499 | 0.792598 |
| ENSG0000 response | Inflamed | TTC40     | protein_cc chr10 | 1.35E+08 | 1.35E+08 | - | 10561 | 9.27685  | 0.188544 | -0.90531 | 0.207104 | -4.37127 | 3.05E-05 | 0.000505 | 0.802539 |
| ENSG0000 response | Inflamed | HOXD-AS1  | antisense chr2   | 1.77E+08 | 1.77E+08 | - | 4851  | 1647.928 | 0        | 0.726186 | 0.166153 | 4.370592 | 3.06E-05 | 0.000506 | 0.804627 |
| ENSG0000 response | Inflamed | RP11-16K1 | antisense chr15  | 79271231 | 79278268 | + | 1900  | 4.930788 | 0.310263 | -0.79057 | 0.180887 | -4.37055 | 3.06E-05 | 0.000506 | 0.804751 |
| ENSG0000 response | Inflamed | DENND5A   | protein_cc chr11 | 9160372  | 9286937  | - | 8648  | 1639.809 | 0        | -0.80233 | 0.183624 | -4.36942 | 3.07E-05 | 0.000508 | 0.808241 |
| ENSG0000 response | Inflamed | SAA2      | protein_cc chr11 | 18260770 | 18270190 | - | 2227  | 255.1599 | 0.100239 | -2.20191 | 0.504012 | -4.36876 | 3.08E-05 | 0.000509 | 0.810292 |

|                   |          |           |                  |          |          |   |       |          |          |          |          |          |          |          |          |
|-------------------|----------|-----------|------------------|----------|----------|---|-------|----------|----------|----------|----------|----------|----------|----------|----------|
| ENSG0000 response | Inflamed | FAM174B   | protein_cc chr15 | 93160673 | 93353114 | - | 4657  | 786.5561 | 0        | 0.363471 | 0.083224 | 4.367399 | 3.10E-05 | 0.000511 | 0.814544 |
| ENSG0000 response | Inflamed | RP11-187E | protein_cc chr14 | 32414059 | 32419588 | + | 550   | 19.58473 | 0.023866 | 0.715877 | 0.163954 | 4.366325 | 3.11E-05 | 0.000513 | 0.817905 |
| ENSG0000 response | Inflamed | RP5-881L2 | antisense chr20  | 42976192 | 42983825 | - | 906   | 170.3938 | 0.009547 | 1.142125 | 0.261616 | 4.365658 | 3.12E-05 | 0.000514 | 0.819996 |
| ENSG0000 response | Inflamed | PLD3      | protein_cc chr19 | 40854363 | 40886346 | + | 5184  | 8170.141 | 0        | -0.45069 | 0.103236 | -4.36561 | 3.12E-05 | 0.000514 | 0.820154 |
| ENSG0000 response | Inflamed | ALP1      | protein_cc chr19 | 36358801 | 36370693 | + | 3656  | 90.46062 | 0.004773 | -0.84213 | 0.192915 | -4.3653  | 3.12E-05 | 0.000514 | 0.821109 |
| ENSG0000 response | Inflamed | MT-TY     | Mt_tRNA chrM     | 5826     | 5891     | - | 66    | 53.00955 | 0        | 0.688524 | 0.157734 | 4.365106 | 3.13E-05 | 0.000514 | 0.821734 |
| ENSG0000 response | Inflamed | CFDP1     | protein_cc chr16 | 75327596 | 75467383 | - | 3230  | 1057.272 | 0        | 0.417004 | 0.095535 | 4.364957 | 3.13E-05 | 0.000514 | 0.822205 |
| ENSG0000 response | Inflamed | RP11-637A | lincRNA chr12    | 69068151 | 69081535 | - | 2845  | 5.916468 | 0.121718 | -0.69051 | 0.158215 | -4.3644  | 3.13E-05 | 0.000514 | 0.823958 |
| ENSG0000 response | Inflamed | SLC22A18  | protein_cc chr11 | 2909010  | 2924970  | - | 1782  | 666.5418 | 0        | 0.799364 | 0.183158 | 4.364334 | 3.13E-05 | 0.000514 | 0.824172 |
| ENSG0000 response | Inflamed | HOXA11-A  | antisense chr7   | 27224137 | 27228912 | + | 2917  | 605.1265 | 0        | 0.810543 | 0.185733 | 4.364015 | 3.14E-05 | 0.000515 | 0.825179 |
| ENSG0000 response | Inflamed | SNCAIP    | protein_cc chr5  | 1.22E+08 | 1.22E+08 | + | 7325  | 218.2291 | 0.002387 | -0.87992 | 0.201642 | -4.36377 | 3.14E-05 | 0.000515 | 0.825965 |
| ENSG0000 response | Inflamed | CPT1C     | protein_cc chr19 | 50194155 | 50216988 | + | 5864  | 96.06444 | 0.002387 | -0.93373 | 0.213977 | -4.3637  | 3.14E-05 | 0.000515 | 0.826162 |
| ENSG0000 response | Inflamed | TEAD2     | protein_cc chr19 | 49843852 | 49865714 | - | 2980  | 756.7757 | 0        | -0.56437 | 0.129342 | -4.36341 | 3.15E-05 | 0.000515 | 0.827092 |
| ENSG0000 response | Inflamed | FAM65A    | protein_cc chr16 | 67552321 | 67580691 | + | 6730  | 2058.484 | 0        | -0.75642 | 0.173368 | -4.36311 | 3.15E-05 | 0.000515 | 0.828059 |
| ENSG0000 response | Inflamed | SRGAP2    | protein_cc chr1  | 2.07E+08 | 2.07E+08 | + | 9263  | 893.2983 | 0        | -0.57743 | 0.132345 | -4.36307 | 3.15E-05 | 0.000515 | 0.828184 |
| ENSG0000 response | Inflamed | TLR8      | protein_cc chrX  | 12924739 | 12941288 | + | 4353  | 270.7375 | 0        | -1.01004 | 0.231516 | -4.36273 | 3.15E-05 | 0.000515 | 0.829255 |
| ENSG0000 response | Inflamed | SEC14L1   | protein_cc chr17 | 75082798 | 75213179 | + | 10846 | 5528.599 | 0        | -0.59833 | 0.137153 | -4.36252 | 3.16E-05 | 0.000515 | 0.829927 |
| ENSG0000 response | Inflamed | PLAUR     | protein_cc chr19 | 44150247 | 44174699 | - | 4457  | 3315.957 | 0        | -0.83394 | 0.191169 | -4.36232 | 3.16E-05 | 0.000515 | 0.830559 |
| ENSG0000 response | Inflamed | RP5-857K2 | pseudoger chr1   | 568137   | 568818   | + | 682   | 2554.248 | 0        | 0.580632 | 0.133104 | 4.362255 | 3.16E-05 | 0.000515 | 0.830764 |
| ENSG0000 response | Inflamed | KCNH3     | protein_cc chr12 | 49932940 | 49952091 | + | 4265  | 28.61337 | 0.009547 | -0.74103 | 0.169915 | -4.3612  | 3.17E-05 | 0.000517 | 0.834137 |
| ENSG0000 response | Inflamed | AKAP1     | protein_cc chr17 | 55162453 | 55198710 | + | 5399  | 6864.687 | 0        | 0.620616 | 0.142312 | 4.360939 | 3.18E-05 | 0.000517 | 0.834963 |
| ENSG0000 response | Inflamed | TNFAIP6   | protein_cc chr2  | 1.52E+08 | 1.52E+08 | + | 1577  | 173.4845 | 0.00716  | -1.4835  | 0.340251 | -4.36002 | 3.19E-05 | 0.000518 | 0.837921 |
| ENSG0000 response | Inflamed | DDIT4     | protein_cc chr10 | 74033678 | 74035794 | + | 2058  | 2590.625 | 0        | -0.66693 | 0.152966 | -4.35997 | 3.19E-05 | 0.000518 | 0.838073 |
| ENSG0000 response | Inflamed | TECTA     | protein_cc chr11 | 1.21E+08 | 1.21E+08 | + | 7696  | 43.47017 | 0.019093 | -0.8769  | 0.201135 | -4.35978 | 3.19E-05 | 0.000518 | 0.838684 |
| ENSG0000 response | Inflamed | MRV11-AS  | antisense chr11  | 10562819 | 10621479 | + | 1403  | 2.207637 | 0.582339 | -0.67205 | 0.154148 | -4.35977 | 3.19E-05 | 0.000518 | 0.838705 |
| ENSG0000 response | Inflamed | TINCR     | lincRNA chr19    | 5558178  | 5568045  | - | 3925  | 171.8067 | 0        | 1.028207 | 0.235904 | 4.358584 | 3.20E-05 | 0.00052  | 0.842529 |
| ENSG0000 response | Inflamed | RP11-677A | antisense chr11  | 1.25E+08 | 1.25E+08 | + | 1538  | 49.36038 | 0        | 0.848769 | 0.194735 | 4.358576 | 3.20E-05 | 0.00052  | 0.842556 |
| ENSG0000 response | Inflamed | CPXM1     | protein_cc chr20 | 2774715  | 2781283  | - | 2391  | 1272.024 | 0        | -1.19884 | 0.275251 | -4.35544 | 3.24E-05 | 0.000526 | 0.852723 |
| ENSG0000 response | Inflamed | FAM225A   | lincRNA chr9     | 1.16E+08 | 1.16E+08 | + | 6100  | 30.56086 | 0.004773 | -0.76657 | 0.176014 | -4.35515 | 3.25E-05 | 0.000526 | 0.853676 |
| ENSG0000 response | Inflamed | UGT1A1    | protein_cc chr2  | 2.35E+08 | 2.35E+08 | + | 7982  | 304.0644 | 0.02864  | 1.334406 | 0.306516 | 4.353456 | 3.27E-05 | 0.000529 | 0.859234 |
| ENSG0000 response | Inflamed | ISLR      | protein_cc chr15 | 74466012 | 74469213 | + | 2671  | 1473.64  | 0        | -1.0356  | 0.237929 | -4.35255 | 3.28E-05 | 0.000531 | 0.862215 |
| ENSG0000 response | Inflamed | COL24A1   | protein_cc chr1  | 86194916 | 86622626 | - | 9568  | 47.90453 | 0.023866 | -1.14646 | 0.263417 | -4.35227 | 3.28E-05 | 0.000531 | 0.863138 |
| ENSG0000 response | Inflamed | H1FO      | protein_cc chr22 | 38201114 | 38203442 | + | 2329  | 8982.845 | 0        | 0.433613 | 0.099658 | 4.351019 | 3.30E-05 | 0.000533 | 0.867288 |
| ENSG0000 response | Inflamed | APOC1     | protein_cc chr19 | 45417504 | 45422606 | + | 1231  | 515.2243 | 0        | -0.83141 | 0.191088 | -4.35092 | 3.30E-05 | 0.000533 | 0.867611 |
| ENSG0000 response | Inflamed | IGKV1-8   | IG_V_gene chr2   | 89291928 | 89292450 | - | 398   | 498.9905 | 0.002387 | -1.45703 | 0.334934 | -4.3502  | 3.31E-05 | 0.000534 | 0.870018 |
| ENSG0000 response | Inflamed | CR1L      | protein_cc chr1  | 2.08E+08 | 2.08E+08 | + | 2768  | 6.534606 | 0.231504 | -0.83233 | 0.191367 | -4.3494  | 3.32E-05 | 0.000536 | 0.87268  |
| ENSG0000 response | Inflamed | MMP19     | protein_cc chr12 | 56229217 | 56236750 | - | 4672  | 1057.27  | 0        | -0.96852 | 0.222688 | -4.34923 | 3.32E-05 | 0.000536 | 0.873249 |
| ENSG0000 response | Inflamed | CLEC2B    | protein_cc chr12 | 10005583 | 10022735 | - | 2638  | 292.1599 | 0        | -0.7883  | 0.181252 | -4.34916 | 3.32E-05 | 0.000536 | 0.873461 |
| ENSG0000 response | Inflamed | ACO2      | protein_cc chr22 | 41865129 | 41924993 | + | 4041  | 11566.55 | 0        | 0.370011 | 0.085083 | 4.348844 | 3.33E-05 | 0.000536 | 0.874531 |
| ENSG0000 response | Inflamed | FGFR2     | protein_cc chr10 | 1.23E+08 | 1.23E+08 | - | 7543  | 1615.912 | 0        | 1.016131 | 0.233683 | 4.348339 | 3.33E-05 | 0.000537 | 0.876224 |

|                   |          |           |                  |          |          |   |       |          |          |          |          |          |          |          |          |
|-------------------|----------|-----------|------------------|----------|----------|---|-------|----------|----------|----------|----------|----------|----------|----------|----------|
| ENSG0000 response | Inflamed | DUSP4     | protein_cc chr8  | 29190581 | 29208185 | - | 7257  | 816.9069 | 0        | -0.99383 | 0.228569 | -4.34805 | 3.34E-05 | 0.000537 | 0.877189 |
| ENSG0000 response | Inflamed | RARRES2   | protein_cc chr7  | 1.5E+08  | 1.5E+08  | - | 1919  | 2346.888 | 0        | -0.81698 | 0.187923 | -4.34745 | 3.34E-05 | 0.000538 | 0.879218 |
| ENSG0000 response | Inflamed | CTD-2583F | antisense chr16  | 12853139 | 12855019 | + | 927   | 2.787589 | 0.463007 | -0.6846  | 0.157501 | -4.34666 | 3.35E-05 | 0.000539 | 0.881859 |
| ENSG0000 response | Inflamed | HVCN1     | protein_cc chr12 | 1.11E+08 | 1.11E+08 | - | 3595  | 473.9236 | 0        | -0.79088 | 0.181952 | -4.34663 | 3.35E-05 | 0.000539 | 0.88198  |
| ENSG0000 response | Inflamed | VASH1     | protein_cc chr14 | 77228532 | 77249354 | + | 6498  | 2023.391 | 0        | -0.61968 | 0.142607 | -4.34538 | 3.37E-05 | 0.000541 | 0.886187 |
| ENSG0000 response | Inflamed | P2RX5     | protein_cc chr17 | 3575493  | 3599698  | - | 4190  | 344.4821 | 0        | -1.07536 | 0.24748  | -4.34525 | 3.37E-05 | 0.000541 | 0.886629 |
| ENSG0000 response | Inflamed | RASAL3    | protein_cc chr19 | 15562435 | 15575382 | - | 4681  | 1285.778 | 0        | -0.73728 | 0.169717 | -4.34419 | 3.39E-05 | 0.000543 | 0.890239 |
| ENSG0000 response | Inflamed | CCDC64B   | protein_cc chr16 | 3077683  | 3086927  | - | 4690  | 3662.446 | 0        | 0.853609 | 0.196552 | 4.342905 | 3.40E-05 | 0.000545 | 0.894618 |
| ENSG0000 response | Inflamed | ZHX2      | protein_cc chr8  | 1.24E+08 | 1.24E+08 | + | 4714  | 1349.826 | 0        | -0.55871 | 0.128652 | -4.34281 | 3.40E-05 | 0.000545 | 0.894927 |
| ENSG0000 response | Inflamed | IGHV4-59  | IG_V_gene chr14  | 1.07E+08 | 1.07E+08 | - | 1432  | 15020.42 | 0        | -1.18798 | 0.273566 | -4.34256 | 3.41E-05 | 0.000545 | 0.895803 |
| ENSG0000 response | Inflamed | CHSY3     | protein_cc chr5  | 1.29E+08 | 1.3E+08  | + | 3938  | 57.33174 | 0.02148  | -0.92951 | 0.214073 | -4.34203 | 3.41E-05 | 0.000546 | 0.897632 |
| ENSG0000 response | Inflamed | TBXAS1    | protein_cc chr7  | 1.39E+08 | 1.4E+08  | + | 6271  | 1252.377 | 0        | -0.57012 | 0.131305 | -4.34199 | 3.41E-05 | 0.000546 | 0.897766 |
| ENSG0000 response | Inflamed | CTC-241F2 | antisense chr19  | 48758932 | 48761456 | + | 1969  | 170.5084 | 0        | -0.62266 | 0.143434 | -4.34108 | 3.43E-05 | 0.000547 | 0.900886 |
| ENSG0000 response | Inflamed | GNA11     | protein_cc chr19 | 3094408  | 3124002  | + | 6242  | 13821.31 | 0        | 0.610837 | 0.140717 | 4.340876 | 3.43E-05 | 0.000547 | 0.901581 |
| ENSG0000 response | Inflamed | PLEKHF1   | protein_cc chr19 | 30155963 | 30166364 | + | 2681  | 354.1551 | 0        | -0.56751 | 0.130743 | -4.34061 | 3.43E-05 | 0.000548 | 0.902493 |
| ENSG0000 response | Inflamed | IGHV2-26  | IG_V_gene chr14  | 1.07E+08 | 1.07E+08 | - | 381   | 2231.663 | 0        | -1.47228 | 0.339379 | -4.33815 | 3.47E-05 | 0.000552 | 0.911031 |
| ENSG0000 response | Inflamed | CNNM2     | protein_cc chr10 | 1.05E+08 | 1.05E+08 | + | 16324 | 1473.356 | 0        | 0.572606 | 0.131998 | 4.338005 | 3.47E-05 | 0.000552 | 0.911526 |
| ENSG0000 response | Inflamed | TGFB2     | protein_cc chr1  | 2.19E+08 | 2.19E+08 | + | 5151  | 76.62053 | 0.02148  | -1.05665 | 0.243591 | -4.3378  | 3.47E-05 | 0.000553 | 0.912229 |
| ENSG0000 response | Inflamed | HMG1P7    | pseudoger chr3   | 93707478 | 93707790 | - | 313   | 4.761337 | 0.238663 | 0.710405 | 0.163783 | 4.337484 | 3.47E-05 | 0.000553 | 0.91334  |
| ENSG0000 response | Inflamed | TMEM256   | protein_cc chr17 | 7293046  | 7307416  | - | 3227  | 86.1599  | 0.002387 | -0.53237 | 0.122811 | -4.33486 | 3.51E-05 | 0.000558 | 0.92253  |
| ENSG0000 response | Inflamed | IGLV7-46  | IG_V_gene chr22  | 22723982 | 22724454 | + | 384   | 4029.036 | 0        | -1.35654 | 0.312939 | -4.33485 | 3.51E-05 | 0.000558 | 0.922581 |
| ENSG0000 response | Inflamed | APLN      | protein_cc chrX  | 1.29E+08 | 1.29E+08 | - | 3220  | 93.99523 | 0.011933 | -1.19447 | 0.275563 | -4.33466 | 3.51E-05 | 0.000558 | 0.923226 |
| ENSG0000 response | Inflamed | AC112198  | pseudoger chr5   | 54104038 | 54168379 | - | 6996  | 1.792363 | 0.653938 | -0.6768  | 0.156145 | -4.33443 | 3.51E-05 | 0.000558 | 0.924066 |
| ENSG0000 response | Inflamed | DNAJC12   | protein_cc chr10 | 69556427 | 69597924 | - | 2117  | 223.7947 | 0        | 0.773311 | 0.178428 | 4.334018 | 3.52E-05 | 0.000559 | 0.925506 |
| ENSG0000 response | Inflamed | IGKV1-13  | IG_V_pseu chr2   | 89345492 | 89345963 | - | 347   | 34.05251 | 0.145585 | -1.24856 | 0.288125 | -4.33339 | 3.53E-05 | 0.00056  | 0.927717 |
| ENSG0000 response | Inflamed | USF1      | protein_cc chr1  | 1.61E+08 | 1.61E+08 | - | 2336  | 1874.317 | 0        | -0.30303 | 0.06994  | -4.33278 | 3.54E-05 | 0.000561 | 0.929885 |
| ENSG0000 response | Inflamed | KRT6B     | protein_cc chr12 | 52840435 | 52845910 | - | 2282  | 280.5084 | 0.119332 | -2.05718 | 0.474816 | -4.33258 | 3.54E-05 | 0.000561 | 0.930594 |
| ENSG0000 response | Inflamed | SLC7A7    | protein_cc chr14 | 23242431 | 23299029 | - | 5131  | 1306.236 | 0        | -0.56728 | 0.130948 | -4.33214 | 3.55E-05 | 0.000561 | 0.932167 |
| ENSG0000 response | Inflamed | CASC4P1   | pseudoger chr13  | 20137729 | 20139040 | - | 1312  | 6.923628 | 0.157518 | -0.79559 | 0.183744 | -4.32988 | 3.58E-05 | 0.000566 | 0.940238 |
| ENSG0000 response | Inflamed | FAM110B   | protein_cc chr8  | 58907068 | 59116838 | + | 4943  | 160.4057 | 0.00716  | -0.88205 | 0.203718 | -4.32975 | 3.58E-05 | 0.000566 | 0.940694 |
| ENSG0000 response | Inflamed | CBR3-AS1  | processed_chr21  | 37504065 | 37528615 | - | 6438  | 182.9189 | 0        | 0.764096 | 0.176555 | 4.327813 | 3.60E-05 | 0.00057  | 0.947682 |
| ENSG0000 response | Inflamed | CD33      | protein_cc chr19 | 51728320 | 51747115 | + | 5975  | 243.6778 | 0        | -0.51508 | 0.119062 | -4.32612 | 3.63E-05 | 0.000573 | 0.953813 |
| ENSG0000 response | Inflamed | RETNLB    | protein_cc chr3  | 1.08E+08 | 1.08E+08 | - | 1106  | 1189.601 | 0.009547 | 1.653077 | 0.382141 | 4.325833 | 3.63E-05 | 0.000573 | 0.954864 |
| ENSG0000 response | Inflamed | CRELD2    | protein_cc chr22 | 50311815 | 50321188 | + | 5165  | 2782.222 | 0        | -0.45119 | 0.104316 | -4.32519 | 3.64E-05 | 0.000574 | 0.957204 |
| ENSG0000 response | Inflamed | KRTCAP3   | protein_cc chr2  | 27665233 | 27669348 | + | 1403  | 1113.446 | 0        | 0.645453 | 0.149232 | 4.325152 | 3.64E-05 | 0.000574 | 0.957347 |
| ENSG0000 response | Inflamed | XKR3      | protein_cc chr22 | 17264302 | 17302589 | - | 1690  | 1.026253 | 0.799523 | -0.43044 | 0.099573 | -4.32284 | 3.67E-05 | 0.000578 | 0.965811 |
| ENSG0000 response | Inflamed | SLC39A4   | protein_cc chr8  | 1.46E+08 | 1.46E+08 | - | 5033  | 2103.897 | 0        | 0.638569 | 0.147722 | 4.322771 | 3.67E-05 | 0.000578 | 0.966073 |
| ENSG0000 response | Inflamed | RP11-1084 | antisense chr8   | 1.1E+08  | 1.1E+08  | - | 890   | 5.980907 | 0.295943 | -0.83865 | 0.194082 | -4.32112 | 3.70E-05 | 0.000582 | 0.972167 |
| ENSG0000 response | Inflamed | FAM157B   | lincRNA chr9     | 1.41E+08 | 1.41E+08 | + | 2233  | 8.937947 | 0.324582 | -1.08008 | 0.250032 | -4.31979 | 3.72E-05 | 0.000584 | 0.977127 |
| ENSG0000 response | Inflamed | TRPM4     | protein_cc chr19 | 49660998 | 49715093 | + | 6604  | 8946.905 | 0        | 0.596869 | 0.138182 | 4.319457 | 3.72E-05 | 0.000585 | 0.978352 |

|                   |          |           |                  |          |          |   |       |          |          |          |          |          |          |          |          |
|-------------------|----------|-----------|------------------|----------|----------|---|-------|----------|----------|----------|----------|----------|----------|----------|----------|
| ENSG0000 response | Inflamed | ELOVL2    | protein_cc chr6  | 10980992 | 11044547 | - | 3997  | 28.23628 | 0.200477 | -1.43615 | 0.332518 | -4.319   | 3.73E-05 | 0.000585 | 0.980039 |
| ENSG0000 response | Inflamed | TPD52L2   | protein_cc chr20 | 62496596 | 62522898 | + | 4679  | 4273.031 | 0        | -0.25224 | 0.058408 | -4.31853 | 3.73E-05 | 0.000586 | 0.9818   |
| ENSG0000 response | Inflamed | EDNRA     | protein_cc chr4  | 1.48E+08 | 1.48E+08 | + | 4238  | 317.7589 | 0.002387 | -1.09748 | 0.254279 | -4.31604 | 3.77E-05 | 0.000591 | 0.991161 |
| ENSG0000 response | Inflamed | RP3-4770  | antisense chr20  | 34064028 | 34078808 | - | 839   | 25.50358 | 0.002387 | -0.70296 | 0.162881 | -4.31579 | 3.77E-05 | 0.000592 | 0.992112 |
| ENSG0000 response | Inflamed | RAB39B    | protein_cc chrX  | 1.54E+08 | 1.54E+08 | - | 3505  | 79.8043  | 0.009547 | -0.94077 | 0.218    | -4.31548 | 3.78E-05 | 0.000592 | 0.993286 |
| ENSG0000 response | Inflamed | FLI1      | protein_cc chr11 | 1.29E+08 | 1.29E+08 | + | 8479  | 1230.11  | 0        | -0.73331 | 0.169991 | -4.3138  | 3.80E-05 | 0.000595 | 0.999665 |
| ENSG0000 response | Inflamed | EMR1      | protein_cc chr19 | 6887577  | 6940470  | + | 3707  | 238.568  | 0        | -0.9737  | 0.225728 | -4.31361 | 3.81E-05 | 0.000595 | 1        |
| ENSG0000 response | Inflamed | LRRC32    | protein_cc chr11 | 76368568 | 76381791 | - | 4459  | 1769.683 | 0        | -0.70053 | 0.162422 | -4.31304 | 3.81E-05 | 0.000596 | 1        |
| ENSG0000 response | Inflamed | CLEC7A    | protein_cc chr12 | 10269376 | 10282857 | - | 4190  | 497.5012 | 0        | -0.98005 | 0.227253 | -4.31258 | 3.82E-05 | 0.000597 | 1        |
| ENSG0000 response | Inflamed | AL022341  | antisense chr16  | 698473   | 699200   | - | 389   | 12.42482 | 0.026253 | -0.72905 | 0.169067 | -4.31219 | 3.83E-05 | 0.000598 | 1        |
| ENSG0000 response | Inflamed | LINC00537 | pseudoger chr9   | 68413482 | 68414196 | - | 715   | 13.94988 | 0.078759 | -0.84836 | 0.196786 | -4.31107 | 3.84E-05 | 0.0006   | 1        |
| ENSG0000 response | Inflamed | NDRG2     | protein_cc chr14 | 21484922 | 21539031 | - | 7550  | 4164.998 | 0        | 0.627459 | 0.145573 | 4.310276 | 3.85E-05 | 0.000601 | 1        |
| ENSG0000 response | Inflamed | RAMP2     | protein_cc chr17 | 40910465 | 40915059 | + | 1148  | 587.0024 | 0        | -0.84792 | 0.196804 | -4.30845 | 3.88E-05 | 0.000605 | 1        |
| ENSG0000 response | Inflamed | SRM       | protein_cc chr1  | 11114641 | 11120081 | - | 1898  | 2310.391 | 0        | -0.54635 | 0.126817 | -4.30816 | 3.88E-05 | 0.000605 | 1        |
| ENSG0000 response | Inflamed | IGKV1-37  | IG_V_gene chr2   | 89597021 | 89597542 | - | 398   | 12.03341 | 0.131265 | -1.01736 | 0.236213 | -4.30695 | 3.90E-05 | 0.000608 | 1        |
| ENSG0000 response | Inflamed | PPP3CC    | protein_cc chr8  | 22298332 | 22398652 | + | 2896  | 414.9737 | 0        | -0.49933 | 0.116024 | -4.30369 | 3.95E-05 | 0.000615 | 1        |
| ENSG0000 response | Inflamed | XCR1      | protein_cc chr3  | 46058516 | 46069234 | - | 5403  | 210.7375 | 0.002387 | -0.89591 | 0.208186 | -4.30339 | 3.96E-05 | 0.000615 | 1        |
| ENSG0000 response | Inflamed | WNK2      | protein_cc chr9  | 95947198 | 96082854 | + | 13198 | 5181.809 | 0        | 1.089856 | 0.253277 | 4.303024 | 3.96E-05 | 0.000616 | 1        |
| ENSG0000 response | Inflamed | CABYR     | protein_cc chr18 | 21718942 | 21741567 | + | 3195  | 13.29594 | 0.026253 | -0.59311 | 0.137854 | -4.30248 | 3.97E-05 | 0.000616 | 1        |
| ENSG0000 response | Inflamed | PELO      | protein_cc chr5  | 52083774 | 52099880 | + | 4349  | 565.4582 | 0        | -0.32533 | 0.075617 | -4.30236 | 3.97E-05 | 0.000616 | 1        |
| ENSG0000 response | Inflamed | RP11-809C | antisense chr8   | 1.42E+08 | 1.42E+08 | - | 807   | 32.74702 | 0        | -0.5913  | 0.137436 | -4.30233 | 3.97E-05 | 0.000616 | 1        |
| ENSG0000 response | Inflamed | XX-CR54.3 | lincRNA chr1     | 2.49E+08 | 2.49E+08 | - | 1098  | 49.8568  | 0.069212 | 1.377999 | 0.320419 | 4.300619 | 4.00E-05 | 0.00062  | 1        |
| ENSG0000 response | Inflamed | CLEC17A   | protein_cc chr19 | 14693896 | 14721969 | + | 2265  | 126.2411 | 0.026253 | -1.35991 | 0.316308 | -4.29933 | 4.02E-05 | 0.000622 | 1        |
| ENSG0000 response | Inflamed | FAM117A   | protein_cc chr17 | 47787694 | 47866542 | - | 3836  | 874.0907 | 0        | -0.5273  | 0.122649 | -4.29926 | 4.02E-05 | 0.000622 | 1        |
| ENSG0000 response | Inflamed | LINC00694 | lincRNA chr3     | 44462619 | 44465499 | - | 732   | 33.77804 | 0.016706 | -1.10061 | 0.256001 | -4.29923 | 4.02E-05 | 0.000622 | 1        |
| ENSG0000 response | Inflamed | LHX6      | protein_cc chr9  | 1.25E+08 | 1.25E+08 | - | 5748  | 187.6134 | 0.004773 | -0.95386 | 0.221922 | -4.29816 | 4.04E-05 | 0.000624 | 1        |
| ENSG0000 response | Inflamed | BICD1     | protein_cc chr12 | 32259769 | 32536567 | + | 11790 | 269.8831 | 0.002387 | -0.83559 | 0.194479 | -4.29656 | 4.06E-05 | 0.000628 | 1        |
| ENSG0000 response | Inflamed | RP11-772E | pseudoger chr5   | 1.26E+08 | 1.26E+08 | - | 232   | 11.62768 | 0.155131 | 0.795794 | 0.185254 | 4.29569  | 4.07E-05 | 0.00063  | 1        |
| ENSG0000 response | Inflamed | IGKV3OR2  | IG_V_gene chr2   | 87565634 | 87566158 | + | 350   | 71.0358  | 0.033413 | -1.39246 | 0.324235 | -4.2946  | 4.09E-05 | 0.000632 | 1        |
| ENSG0000 response | Inflamed | LOXL1-AS1 | antisense chr15  | 74200424 | 74220589 | - | 4081  | 120.6683 | 0        | -0.66107 | 0.154026 | -4.29196 | 4.13E-05 | 0.000638 | 1        |
| ENSG0000 response | Inflamed | GSG1L     | protein_cc chr16 | 27798850 | 28074830 | - | 5219  | 9.202864 | 0.317422 | 0.838017 | 0.195269 | 4.291599 | 4.14E-05 | 0.000638 | 1        |
| ENSG0000 response | Inflamed | SGTB      | protein_cc chr5  | 64961755 | 65018862 | - | 5748  | 191.3604 | 0        | -0.80463 | 0.187496 | -4.29147 | 4.14E-05 | 0.000638 | 1        |
| ENSG0000 response | Inflamed | CHSY1     | protein_cc chr15 | 1.02E+08 | 1.02E+08 | - | 5555  | 1472.931 | 0        | -0.73492 | 0.171252 | -4.29143 | 4.14E-05 | 0.000638 | 1        |
| ENSG0000 response | Inflamed | PAPLN     | protein_cc chr14 | 73704205 | 73741348 | + | 7699  | 2175.208 | 0        | -0.82975 | 0.193359 | -4.29126 | 4.14E-05 | 0.000638 | 1        |
| ENSG0000 response | Inflamed | SLC26A9   | protein_cc chr1  | 2.06E+08 | 2.06E+08 | - | 5628  | 19.05251 | 0.374702 | -1.4783  | 0.344573 | -4.29022 | 4.16E-05 | 0.00064  | 1        |
| ENSG0000 response | Inflamed | FEV       | protein_cc chr2  | 2.2E+08  | 2.2E+08  | - | 2049  | 122.6062 | 0.023866 | 1.400286 | 0.326443 | 4.289532 | 4.17E-05 | 0.000641 | 1        |
| ENSG0000 response | Inflamed | FGF12     | protein_cc chr3  | 1.92E+08 | 1.92E+08 | - | 7355  | 13.49642 | 0.042959 | -0.799   | 0.186295 | -4.28891 | 4.18E-05 | 0.000643 | 1        |
| ENSG0000 response | Inflamed | FMNL3     | protein_cc chr12 | 50031724 | 50101948 | - | 11982 | 2447.007 | 0        | -0.72187 | 0.168414 | -4.28628 | 4.22E-05 | 0.000649 | 1        |
| ENSG0000 response | Inflamed | LYPD8     | protein_cc chr1  | 2.49E+08 | 2.49E+08 | - | 435   | 2580.933 | 0.00716  | 1.87586  | 0.437736 | 4.285368 | 4.24E-05 | 0.000651 | 1        |
| ENSG0000 response | Inflamed | SHD       | protein_cc chr19 | 4278598  | 4290721  | + | 2811  | 276.4296 | 0        | 0.873661 | 0.203906 | 4.284617 | 4.25E-05 | 0.000652 | 1        |

|                   |          |           |                  |          |          |   |       |          |          |          |          |          |          |          |   |
|-------------------|----------|-----------|------------------|----------|----------|---|-------|----------|----------|----------|----------|----------|----------|----------|---|
| ENSG0000 response | Inflamed | B3GNT6    | protein_cc chr11 | 76745385 | 76753096 | + | 2762  | 3343.874 | 0        | 1.082286 | 0.252619 | 4.284267 | 4.25E-05 | 0.000652 | 1 |
| ENSG0000 response | Inflamed | PTGFR     | protein_cc chr1  | 78769568 | 79005434 | + | 4714  | 204.1384 | 0.004773 | -1.32783 | 0.309938 | -4.28416 | 4.26E-05 | 0.000652 | 1 |
| ENSG0000 response | Inflamed | CRISPLD1  | protein_cc chr8  | 75896750 | 75946793 | + | 4543  | 36.30072 | 0.045346 | -1.07141 | 0.250135 | -4.28333 | 4.27E-05 | 0.000654 | 1 |
| ENSG0000 response | Inflamed | SERHL     | processed_chr22  | 42896585 | 42908566 | + | 1742  | 5.520286 | 0.183771 | 0.667669 | 0.155877 | 4.283299 | 4.27E-05 | 0.000654 | 1 |
| ENSG0000 response | Inflamed | CHCHD10   | protein_cc chr22 | 24108021 | 24110630 | - | 1360  | 4395.291 | 0        | 0.494423 | 0.115435 | 4.283111 | 4.27E-05 | 0.000654 | 1 |
| ENSG0000 response | Inflamed | CARD11    | protein_cc chr7  | 2945775  | 3083579  | - | 4707  | 930.8234 | 0        | -0.83131 | 0.194115 | -4.28259 | 4.28E-05 | 0.000654 | 1 |
| ENSG0000 response | Inflamed | CD80      | protein_cc chr3  | 1.19E+08 | 1.19E+08 | - | 3201  | 96.97375 | 0.004773 | -1.06668 | 0.249076 | -4.28253 | 4.28E-05 | 0.000654 | 1 |
| ENSG0000 response | Inflamed | RP1-2780  | lincRNA chr20    | 10733738 | 10734614 | + | 438   | 60.84487 | 0.011933 | 0.980616 | 0.228983 | 4.282492 | 4.28E-05 | 0.000654 | 1 |
| ENSG0000 response | Inflamed | P2RX5-TA  | protein_cc chr17 | 3566357  | 3599488  | - | 5905  | 19.56802 | 0.047733 | -0.84881 | 0.198219 | -4.28219 | 4.29E-05 | 0.000654 | 1 |
| ENSG0000 response | Inflamed | EXPH5     | protein_cc chr11 | 1.08E+08 | 1.08E+08 | - | 10843 | 616.2243 | 0.002387 | 1.398139 | 0.32651  | 4.282076 | 4.29E-05 | 0.000654 | 1 |
| ENSG0000 response | Inflamed | AC009061  | pseudoger chr16  | 67466595 | 67468931 | + | 2334  | 1357.131 | 0.016706 | 1.573063 | 0.367397 | 4.281644 | 4.30E-05 | 0.000655 | 1 |
| ENSG0000 response | Inflamed | TGIF2     | protein_cc chr20 | 35201891 | 35222353 | + | 3784  | 655.6158 | 0        | -0.61118 | 0.142751 | -4.28143 | 4.30E-05 | 0.000655 | 1 |
| ENSG0000 response | Inflamed | PNPLA3    | protein_cc chr22 | 44319619 | 44360368 | + | 3232  | 48.68974 | 0.033413 | -1.00436 | 0.23463  | -4.28063 | 4.31E-05 | 0.000657 | 1 |
| ENSG0000 response | Inflamed | RP11-3831 | protein_cc chr8  | 72740402 | 73030628 | + | 6284  | 115.0859 | 0.002387 | -0.81078 | 0.189411 | -4.28053 | 4.31E-05 | 0.000657 | 1 |
| ENSG0000 response | Inflamed | CDCA4     | protein_cc chr14 | 1.05E+08 | 1.05E+08 | - | 2513  | 405.389  | 0        | -0.35982 | 0.084066 | -4.28022 | 4.32E-05 | 0.000657 | 1 |
| ENSG0000 response | Inflamed | SLC15A4   | protein_cc chr12 | 1.29E+08 | 1.29E+08 | - | 5493  | 819.3604 | 0        | -0.42401 | 0.099067 | -4.28006 | 4.32E-05 | 0.000657 | 1 |
| ENSG0000 response | Inflamed | ADPRHL1   | protein_cc chr13 | 1.14E+08 | 1.14E+08 | - | 2308  | 134.179  | 0        | 0.465375 | 0.108738 | 4.279802 | 4.33E-05 | 0.000657 | 1 |
| ENSG0000 response | Inflamed | SLC8A3    | protein_cc chr14 | 70510934 | 70655787 | - | 8444  | 56.05967 | 0.016706 | -0.83577 | 0.195306 | -4.27928 | 4.33E-05 | 0.000658 | 1 |
| ENSG0000 response | Inflamed | CPPED1    | protein_cc chr16 | 12756919 | 12897874 | - | 3221  | 979.9332 | 0        | -0.37786 | 0.088301 | -4.27925 | 4.34E-05 | 0.000658 | 1 |
| ENSG0000 response | Inflamed | NUS1P3    | pseudoger chr13  | 24902349 | 24903210 | + | 862   | 4.183771 | 0.391408 | 0.699583 | 0.163495 | 4.278927 | 4.34E-05 | 0.000659 | 1 |
| ENSG0000 response | Inflamed | GP2       | protein_cc chr16 | 20320894 | 20339130 | - | 4048  | 193.1575 | 0.009547 | 1.305573 | 0.305132 | 4.278713 | 4.34E-05 | 0.000659 | 1 |
| ENSG0000 response | Inflamed | AC078883  | antisense chr2   | 1.73E+08 | 1.73E+08 | - | 1077  | 22.43198 | 0.011933 | -0.67062 | 0.156761 | -4.27796 | 4.36E-05 | 0.00066  | 1 |
| ENSG0000 response | Inflamed | YPEL3     | protein_cc chr16 | 30103635 | 30108236 | - | 3181  | 1807.468 | 0        | -0.47323 | 0.110643 | -4.27771 | 4.37E-05 | 0.000661 | 1 |
| ENSG0000 response | Inflamed | EGFLAM    | protein_cc chr5  | 38258511 | 38465123 | + | 5724  | 322.4749 | 0.002387 | -1.00604 | 0.235218 | -4.27707 | 4.37E-05 | 0.000661 | 1 |
| ENSG0000 response | Inflamed | MGAT1     | protein_cc chr5  | 1.8E+08  | 1.8E+08  | - | 5817  | 9325.575 | 0        | -0.35249 | 0.082417 | -4.27692 | 4.37E-05 | 0.000661 | 1 |
| ENSG0000 response | Inflamed | PTPRC     | protein_cc chr1  | 1.99E+08 | 1.99E+08 | + | 8507  | 3062.084 | 0        | -1.04354 | 0.243998 | -4.27684 | 4.38E-05 | 0.000661 | 1 |
| ENSG0000 response | Inflamed | ATP2C2    | protein_cc chr16 | 84402133 | 84497793 | + | 6693  | 4655.943 | 0        | 0.925511 | 0.216419 | 4.276473 | 4.38E-05 | 0.000662 | 1 |
| ENSG0000 response | Inflamed | RP11-4321 | antisense chr16  | 71757083 | 71758133 | + | 777   | 12.48687 | 0.124105 | 0.727686 | 0.170163 | 4.27642  | 4.38E-05 | 0.000662 | 1 |
| ENSG0000 response | Inflamed | IGKV1D-33 | IG_V_gene chr2   | 89952792 | 89953355 | + | 440   | 326.4558 | 0        | -1.22555 | 0.286592 | -4.27629 | 4.38E-05 | 0.000662 | 1 |
| ENSG0000 response | Inflamed | GPR35     | protein_cc chr2  | 2.42E+08 | 2.42E+08 | + | 3144  | 2482.53  | 0        | 0.572927 | 0.134017 | 4.275035 | 4.41E-05 | 0.000664 | 1 |
| ENSG0000 response | Inflamed | RP11-2531 | antisense chr15  | 69689243 | 69707368 | - | 2265  | 9.608592 | 0.095465 | -0.82412 | 0.192796 | -4.27455 | 4.41E-05 | 0.000665 | 1 |
| ENSG0000 response | Inflamed | BCL2L1    | protein_cc chr20 | 30252255 | 30311792 | - | 3314  | 4955.94  | 0        | -0.35309 | 0.082603 | -4.27447 | 4.41E-05 | 0.000665 | 1 |
| ENSG0000 response | Inflamed | ADRB2     | protein_cc chr5  | 1.48E+08 | 1.48E+08 | + | 2041  | 120.1575 | 0.002387 | -0.57719 | 0.135047 | -4.274   | 4.42E-05 | 0.000666 | 1 |
| ENSG0000 response | Inflamed | VIL1      | protein_cc chr2  | 2.19E+08 | 2.19E+08 | + | 6920  | 13172.8  | 0        | 1.091649 | 0.25543  | 4.273764 | 4.43E-05 | 0.000666 | 1 |
| ENSG0000 response | Inflamed | P2RX1     | protein_cc chr17 | 3799886  | 3819794  | - | 3970  | 737.7136 | 0        | -0.77281 | 0.180834 | -4.2736  | 4.43E-05 | 0.000666 | 1 |
| ENSG0000 response | Inflamed | MFAP2     | protein_cc chr1  | 17300997 | 17307330 | - | 2915  | 247.2029 | 0.002387 | -0.95237 | 0.222961 | -4.27149 | 4.46E-05 | 0.000671 | 1 |
| ENSG0000 response | Inflamed | AC003991  | antisense chr7   | 87848674 | 87921781 | + | 2825  | 15.43437 | 0.045346 | 0.849168 | 0.198806 | 4.271334 | 4.47E-05 | 0.000671 | 1 |
| ENSG0000 response | Inflamed | LINC00582 | antisense chr1   | 2.32E+08 | 2.32E+08 | - | 597   | 24.93079 | 0.016706 | -0.91962 | 0.215312 | -4.27113 | 4.47E-05 | 0.000671 | 1 |
| ENSG0000 response | Inflamed | AKIP1     | protein_cc chr11 | 8932686  | 8941631  | + | 2300  | 370.5847 | 0        | -0.28561 | 0.066882 | -4.27029 | 4.49E-05 | 0.000673 | 1 |
| ENSG0000 response | Inflamed | IGHV3-21  | IG_V_gene chr14  | 1.07E+08 | 1.07E+08 | - | 430   | 16243.19 | 0        | -1.30906 | 0.306604 | -4.26953 | 4.50E-05 | 0.000675 | 1 |

|                   |          |           |                  |          |          |   |      |          |          |          |          |          |          |          |   |
|-------------------|----------|-----------|------------------|----------|----------|---|------|----------|----------|----------|----------|----------|----------|----------|---|
| ENSG0000 response | Inflamed | NDUFS3    | protein_cc chr11 | 47586888 | 47606114 | + | 3670 | 1915.243 | 0        | 0.347247 | 0.081336 | 4.269315 | 4.50E-05 | 0.000675 | 1 |
| ENSG0000 response | Inflamed | IGKV1D-8  | IG_V_gene chr2   | 90259593 | 90260248 | + | 532  | 108.8425 | 0.011933 | -1.30732 | 0.306226 | -4.26913 | 4.50E-05 | 0.000675 | 1 |
| ENSG0000 response | Inflamed | C19orf77  | protein_cc chr19 | 3474405  | 3480540  | - | 1077 | 663.401  | 0        | 0.944782 | 0.221395 | 4.26741  | 4.53E-05 | 0.000679 | 1 |
| ENSG0000 response | Inflamed | PCSK6     | protein_cc chr15 | 1.02E+08 | 1.02E+08 | - | 9348 | 2759.527 | 0        | 0.697502 | 0.163459 | 4.267138 | 4.54E-05 | 0.000679 | 1 |
| ENSG0000 response | Inflamed | GOLT1A    | protein_cc chr1  | 2.04E+08 | 2.04E+08 | - | 1136 | 164.4057 | 0.004773 | 0.876904 | 0.205517 | 4.266832 | 4.54E-05 | 0.00068  | 1 |
| ENSG0000 response | Inflamed | SBNO2     | protein_cc chr19 | 1107636  | 1174282  | - | 6476 | 7246.43  | 0        | -0.65958 | 0.154594 | -4.2665  | 4.55E-05 | 0.00068  | 1 |
| ENSG0000 response | Inflamed | HSD17B11  | protein_cc chr4  | 88257762 | 88312538 | - | 2435 | 3544.835 | 0        | 0.56287  | 0.131932 | 4.266361 | 4.55E-05 | 0.00068  | 1 |
| ENSG0000 response | Inflamed | ESRRA     | protein_cc chr11 | 64073044 | 64084215 | + | 3030 | 5739.764 | 0        | 0.401746 | 0.094169 | 4.266214 | 4.55E-05 | 0.00068  | 1 |
| ENSG0000 response | Inflamed | RP11-339E | sense_intr chr9  | 1.31E+08 | 1.31E+08 | + | 409  | 6.472554 | 0.112172 | -0.66539 | 0.155989 | -4.26561 | 4.57E-05 | 0.000681 | 1 |
| ENSG0000 response | Inflamed | IGKV2-24  | IG_V_gene chr2   | 89475812 | 89476644 | - | 390  | 3608.019 | 0.002387 | -1.32511 | 0.310677 | -4.26524 | 4.57E-05 | 0.000682 | 1 |
| ENSG0000 response | Inflamed | CTDSPL    | protein_cc chr3  | 37903451 | 38025960 | + | 5796 | 2721.451 | 0        | 0.517236 | 0.121282 | 4.264749 | 4.58E-05 | 0.000682 | 1 |
| ENSG0000 response | Inflamed | FSTL3     | protein_cc chr19 | 676392   | 683385   | + | 3144 | 543.3532 | 0        | -0.80509 | 0.188783 | -4.26463 | 4.58E-05 | 0.000682 | 1 |
| ENSG0000 response | Inflamed | RP11-701F | pseudoger chr4   | 1.86E+08 | 1.86E+08 | - | 751  | 1.813842 | 0.756563 | -0.74149 | 0.173871 | -4.26457 | 4.58E-05 | 0.000682 | 1 |
| ENSG0000 response | Inflamed | RP4-607I7 | antisense chr11  | 35154202 | 35159579 | - | 1214 | 6.894988 | 0.116945 | -0.70397 | 0.165086 | -4.26424 | 4.59E-05 | 0.000683 | 1 |
| ENSG0000 response | Inflamed | USP2-AS1  | antisense chr11  | 1.19E+08 | 1.19E+08 | + | 4762 | 29.96181 | 0.019093 | 0.851307 | 0.199692 | 4.263097 | 4.61E-05 | 0.000685 | 1 |
| ENSG0000 response | Inflamed | ANXA5     | protein_cc chr4  | 1.23E+08 | 1.23E+08 | - | 3034 | 5400.561 | 0        | -0.5958  | 0.139766 | -4.26284 | 4.61E-05 | 0.000685 | 1 |
| ENSG0000 response | Inflamed | RP11-553A | antisense chr6   | 74403626 | 74405854 | - | 1973 | 2.656325 | 0.389021 | -0.63218 | 0.148304 | -4.26275 | 4.61E-05 | 0.000685 | 1 |
| ENSG0000 response | Inflamed | C20orf195 | protein_cc chr20 | 62184373 | 62188061 | + | 1201 | 8.427208 | 0.081146 | -0.65768 | 0.154296 | -4.26247 | 4.62E-05 | 0.000686 | 1 |
| ENSG0000 response | Inflamed | SLC35D2   | protein_cc chr9  | 99082988 | 99145992 | - | 2203 | 2019.315 | 0        | 0.425942 | 0.099932 | 4.262332 | 4.62E-05 | 0.000686 | 1 |
| ENSG0000 response | Inflamed | SEMG2     | protein_cc chr20 | 43849941 | 43853099 | + | 2051 | 5.98568  | 0.577566 | -1.14021 | 0.267545 | -4.26173 | 4.63E-05 | 0.000687 | 1 |
| ENSG0000 response | Inflamed | CERS5     | protein_cc chr12 | 50523575 | 50561288 | - | 6235 | 746.5274 | 0        | -0.33915 | 0.079585 | -4.26145 | 4.64E-05 | 0.000687 | 1 |
| ENSG0000 response | Inflamed | AC073316  | antisense chr7   | 3303664  | 3342084  | - | 982  | 10.93317 | 0.112172 | -0.95535 | 0.224251 | -4.26019 | 4.66E-05 | 0.00069  | 1 |
| ENSG0000 response | Inflamed | PLEKHJ1   | protein_cc chr19 | 2230002  | 2237703  | - | 4736 | 3312.258 | 0        | 0.389842 | 0.091515 | 4.259882 | 4.67E-05 | 0.00069  | 1 |
| ENSG0000 response | Inflamed | ACSL1     | protein_cc chr4  | 1.86E+08 | 1.86E+08 | - | 6134 | 2249.652 | 0        | -1.00508 | 0.235943 | -4.25984 | 4.67E-05 | 0.00069  | 1 |
| ENSG0000 response | Inflamed | RNF122    | protein_cc chr8  | 33405273 | 33424643 | - | 1868 | 362.716  | 0        | -0.52637 | 0.123589 | -4.25903 | 4.68E-05 | 0.000692 | 1 |
| ENSG0000 response | Inflamed | AC024592  | antisense chr19  | 5847478  | 5858250  | + | 1188 | 30.47255 | 0.085919 | 1.059742 | 0.248897 | 4.257759 | 4.70E-05 | 0.000695 | 1 |
| ENSG0000 response | Inflamed | TYMP      | protein_cc chr22 | 50964181 | 50968485 | - | 3320 | 5059.427 | 0        | -0.79771 | 0.187355 | -4.25774 | 4.70E-05 | 0.000695 | 1 |
| ENSG0000 response | Inflamed | RP11-768F | lincRNA chr12    | 1.2E+08  | 1.2E+08  | - | 1013 | 4.988067 | 0.116945 | -0.48566 | 0.114072 | -4.25753 | 4.71E-05 | 0.000695 | 1 |
| ENSG0000 response | Inflamed | NOTCH4    | protein_cc chr6  | 32162620 | 32191844 | - | 9748 | 927.6301 | 0        | -0.83447 | 0.196024 | -4.25698 | 4.72E-05 | 0.000695 | 1 |
| ENSG0000 response | Inflamed | RP11-555k | pseudoger chr4   | 1.53E+08 | 1.53E+08 | - | 777  | 8.341289 | 0.116945 | -0.78443 | 0.184272 | -4.25693 | 4.72E-05 | 0.000695 | 1 |
| ENSG0000 response | Inflamed | RP11-761E | lincRNA chrX     | 1.15E+08 | 1.15E+08 | - | 2079 | 5.914081 | 0.126492 | 0.575739 | 0.135251 | 4.256836 | 4.72E-05 | 0.000695 | 1 |
| ENSG0000 response | Inflamed | TESC      | protein_cc chr12 | 1.17E+08 | 1.18E+08 | - | 1926 | 245.432  | 0        | -0.91033 | 0.213945 | -4.25497 | 4.75E-05 | 0.0007   | 1 |
| ENSG0000 response | Inflamed | PCSK1N    | protein_cc chrX  | 48689504 | 48694035 | - | 1347 | 262.7924 | 0.002387 | 1.094495 | 0.257233 | 4.254871 | 4.75E-05 | 0.0007   | 1 |
| ENSG0000 response | Inflamed | AEBP1     | protein_cc chr7  | 44143960 | 44154161 | + | 4955 | 7456.258 | 0        | -0.90505 | 0.212742 | -4.25419 | 4.77E-05 | 0.000701 | 1 |
| ENSG0000 response | Inflamed | AVPR1A    | protein_cc chr12 | 63539014 | 63544722 | - | 1678 | 17.37709 | 0.095465 | -1.09245 | 0.256809 | -4.25394 | 4.77E-05 | 0.000701 | 1 |
| ENSG0000 response | Inflamed | AP001046  | lincRNA chr21    | 44783212 | 44786446 | + | 2816 | 1.367542 | 0.706444 | -0.60227 | 0.14164  | -4.2521  | 4.80E-05 | 0.000706 | 1 |
| ENSG0000 response | Inflamed | IGLJ1     | IG_J_gene chr22  | 23235872 | 23235998 | + | 127  | 6.570406 | 0.143198 | -0.6732  | 0.158343 | -4.25156 | 4.81E-05 | 0.000707 | 1 |
| ENSG0000 response | Inflamed | CTNNA1    | pseudoger chr5   | 1.15E+08 | 1.15E+08 | - | 2728 | 20.20286 | 0.040573 | 0.877848 | 0.206553 | 4.25     | 4.84E-05 | 0.00071  | 1 |
| ENSG0000 response | Inflamed | IGKV6-21  | IG_V_gene chr2   | 89459235 | 89459850 | - | 406  | 866.5823 | 0.002387 | -1.37212 | 0.322862 | -4.24987 | 4.84E-05 | 0.00071  | 1 |
| ENSG0000 response | Inflamed | SCAMP2    | protein_cc chr15 | 75136071 | 75165706 | - | 5000 | 11233.87 | 0        | 0.315864 | 0.074324 | 4.249825 | 4.85E-05 | 0.00071  | 1 |

|                   |          |           |                  |          |          |   |       |          |          |          |          |          |          |          |   |
|-------------------|----------|-----------|------------------|----------|----------|---|-------|----------|----------|----------|----------|----------|----------|----------|---|
| ENSG0000 response | Inflamed | CRYBA4    | protein_cc chr22 | 27017928 | 27026636 | + | 811   | 5.940334 | 0.157518 | -0.76174 | 0.17925  | -4.24962 | 4.85E-05 | 0.000711 | 1 |
| ENSG0000 response | Inflamed | RP11-322E | lincRNA chr18    | 33023833 | 33047052 | - | 916   | 5.355609 | 0.183771 | -0.65201 | 0.153448 | -4.24905 | 4.86E-05 | 0.000711 | 1 |
| ENSG0000 response | Inflamed | ACSL4     | protein_cc chrX  | 1.09E+08 | 1.09E+08 | - | 6415  | 1924.143 | 0        | -1.17108 | 0.275614 | -4.24899 | 4.86E-05 | 0.000711 | 1 |
| ENSG0000 response | Inflamed | RBMXL2    | protein_cc chr11 | 7110165  | 7112379  | + | 2215  | 2.346062 | 0.498807 | -0.62644 | 0.147436 | -4.2489  | 4.86E-05 | 0.000711 | 1 |
| ENSG0000 response | Inflamed | TMIGD1    | protein_cc chr17 | 28643351 | 28661077 | - | 1228  | 954.4368 | 0.023866 | 2.129071 | 0.501202 | 4.247933 | 4.88E-05 | 0.000714 | 1 |
| ENSG0000 response | Inflamed | RPS6KA2   | protein_cc chr6  | 1.67E+08 | 1.67E+08 | - | 8243  | 2703.835 | 0        | -0.57549 | 0.135493 | -4.24737 | 4.89E-05 | 0.000715 | 1 |
| ENSG0000 response | Inflamed | RP11-697E | lincRNA chr15    | 90788645 | 90789043 | + | 399   | 5.470167 | 0.128878 | 0.52054  | 0.122577 | 4.246648 | 4.90E-05 | 0.000716 | 1 |
| ENSG0000 response | Inflamed | SCP2      | protein_cc chr1  | 53392901 | 53517375 | + | 8305  | 4876.172 | 0        | 0.514232 | 0.1211   | 4.246333 | 4.91E-05 | 0.000717 | 1 |
| ENSG0000 response | Inflamed | LDHD      | protein_cc chr16 | 75145758 | 75150669 | - | 2359  | 2206.461 | 0        | 0.87406  | 0.20591  | 4.244868 | 4.94E-05 | 0.00072  | 1 |
| ENSG0000 response | Inflamed | CD1B      | protein_cc chr1  | 1.58E+08 | 1.58E+08 | - | 1395  | 23.73747 | 0.124105 | -1.16615 | 0.274724 | -4.24479 | 4.94E-05 | 0.00072  | 1 |
| ENSG0000 response | Inflamed | APOL1     | protein_cc chr22 | 36649056 | 36663576 | + | 3519  | 7445.377 | 0        | -0.90319 | 0.212815 | -4.24401 | 4.95E-05 | 0.000722 | 1 |
| ENSG0000 response | Inflamed | FZD10     | protein_cc chr12 | 1.31E+08 | 1.31E+08 | + | 3282  | 107.5227 | 0.00716  | -0.97519 | 0.229798 | -4.24368 | 4.96E-05 | 0.000722 | 1 |
| ENSG0000 response | Inflamed | CCDC163P  | protein_cc chr1  | 45959538 | 45965751 | - | 2757  | 157.2315 | 0        | -0.6753  | 0.159136 | -4.24356 | 4.96E-05 | 0.000722 | 1 |
| ENSG0000 response | Inflamed | RP11-845C | sense_intr chr18 | 56038798 | 56039898 | + | 1101  | 2.816229 | 0.439141 | 0.645367 | 0.152117 | 4.242571 | 4.98E-05 | 0.000725 | 1 |
| ENSG0000 response | Inflamed | PDLIM4    | protein_cc chr5  | 1.32E+08 | 1.32E+08 | + | 3192  | 557.9785 | 0        | -0.84428 | 0.199041 | -4.24173 | 5.00E-05 | 0.000726 | 1 |
| ENSG0000 response | Inflamed | SLC35G1   | protein_cc chr10 | 95653730 | 95715819 | + | 6829  | 498.9379 | 0        | 0.78036  | 0.183979 | 4.241579 | 5.00E-05 | 0.000726 | 1 |
| ENSG0000 response | Inflamed | UQCRFS1   | protein_cc chr19 | 29698173 | 29704448 | - | 1530  | 3843.852 | 0        | 0.334316 | 0.07882  | 4.241498 | 5.00E-05 | 0.000726 | 1 |
| ENSG0000 response | Inflamed | NLRP3     | protein_cc chr1  | 2.48E+08 | 2.48E+08 | + | 4757  | 287.7518 | 0        | -0.90893 | 0.214341 | -4.24059 | 5.02E-05 | 0.000728 | 1 |
| ENSG0000 response | Inflamed | MT-TL2    | Mt_tRNA chrM     | 12266    | 12336    | + | 71    | 16.25776 | 0.054893 | 0.880711 | 0.207687 | 4.240569 | 5.02E-05 | 0.000728 | 1 |
| ENSG0000 response | Inflamed | TMEM71    | protein_cc chr8  | 1.34E+08 | 1.34E+08 | - | 3329  | 147.1289 | 0        | -0.84696 | 0.199769 | -4.23971 | 5.03E-05 | 0.00073  | 1 |
| ENSG0000 response | Inflamed | LBP       | protein_cc chr20 | 36974759 | 37005665 | + | 1961  | 41.28401 | 0.231504 | -1.76863 | 0.417192 | -4.23936 | 5.04E-05 | 0.000731 | 1 |
| ENSG0000 response | Inflamed | DBN1      | protein_cc chr5  | 1.77E+08 | 1.77E+08 | - | 5119  | 1322.298 | 0        | -0.7598  | 0.179236 | -4.23913 | 5.04E-05 | 0.000731 | 1 |
| ENSG0000 response | Inflamed | RP11-126C | antisense chr17  | 204528   | 206673   | + | 913   | 21.53461 | 0.045346 | 0.852183 | 0.201031 | 4.239068 | 5.05E-05 | 0.000731 | 1 |
| ENSG0000 response | Inflamed | ACTN1     | protein_cc chr14 | 69340860 | 69446157 | - | 10626 | 8975.883 | 0        | -0.51654 | 0.12187  | -4.23848 | 5.06E-05 | 0.000732 | 1 |
| ENSG0000 response | Inflamed | CALHM2    | protein_cc chr10 | 1.05E+08 | 1.05E+08 | - | 3620  | 705.2554 | 0        | -0.65244 | 0.153972 | -4.23737 | 5.08E-05 | 0.000734 | 1 |
| ENSG0000 response | Inflamed | S1PR2     | protein_cc chr19 | 10334520 | 10341948 | - | 1173  | 138.8305 | 0.00716  | -0.76403 | 0.18031  | -4.23732 | 5.08E-05 | 0.000734 | 1 |
| ENSG0000 response | Inflamed | IGLV2-11  | IG_V_gene chr22  | 23134980 | 23135496 | + | 400   | 12821.25 | 0        | -1.24036 | 0.292795 | -4.23626 | 5.10E-05 | 0.000737 | 1 |
| ENSG0000 response | Inflamed | SLC16A6   | protein_cc chr17 | 66263167 | 66287408 | - | 4056  | 67.83294 | 0.00716  | -1.10899 | 0.261812 | -4.23583 | 5.11E-05 | 0.000737 | 1 |
| ENSG0000 response | Inflamed | RP11-126k | antisense chr1   | 1.51E+08 | 1.51E+08 | + | 618   | 8.918854 | 0.059666 | -0.65173 | 0.153862 | -4.23577 | 5.11E-05 | 0.000737 | 1 |
| ENSG0000 response | Inflamed | SLC16A9   | protein_cc chr10 | 61410523 | 61495760 | - | 4425  | 992.8473 | 0        | 1.277887 | 0.301721 | 4.235324 | 5.12E-05 | 0.000738 | 1 |
| ENSG0000 response | Inflamed | AMN       | protein_cc chr14 | 1.03E+08 | 1.03E+08 | + | 4646  | 5983.274 | 0        | 0.950153 | 0.224435 | 4.233535 | 5.15E-05 | 0.000743 | 1 |
| ENSG0000 response | Inflamed | RP11-91K1 | antisense chr1   | 20140860 | 20145995 | + | 447   | 4.312649 | 0.25537  | 0.647816 | 0.153027 | 4.233354 | 5.16E-05 | 0.000743 | 1 |
| ENSG0000 response | Inflamed | MYBPC2    | protein_cc chr19 | 50936160 | 50969578 | + | 3708  | 47.21002 | 0.02864  | -1.17725 | 0.278104 | -4.23314 | 5.16E-05 | 0.000743 | 1 |
| ENSG0000 response | Inflamed | TLR1      | protein_cc chr4  | 38792298 | 38858438 | - | 4533  | 296.7852 | 0        | -0.89885 | 0.212339 | -4.23309 | 5.16E-05 | 0.000743 | 1 |
| ENSG0000 response | Inflamed | VTCN1     | protein_cc chr1  | 1.18E+08 | 1.18E+08 | - | 3001  | 3.546539 | 0.587112 | -0.96406 | 0.227772 | -4.23257 | 5.17E-05 | 0.000744 | 1 |
| ENSG0000 response | Inflamed | TMEM253   | protein_cc chr14 | 21567096 | 21571883 | + | 1961  | 730.4964 | 0        | 0.909223 | 0.214895 | 4.23102  | 5.20E-05 | 0.000748 | 1 |
| ENSG0000 response | Inflamed | FAM46C    | protein_cc chr1  | 1.18E+08 | 1.18E+08 | + | 5751  | 5750.726 | 0        | -0.83063 | 0.196345 | -4.23049 | 5.21E-05 | 0.000748 | 1 |
| ENSG0000 response | Inflamed | IGHV3-73  | IG_V_gene chr14  | 1.07E+08 | 1.07E+08 | - | 437   | 2819.148 | 0.002387 | -1.31972 | 0.311959 | -4.23043 | 5.21E-05 | 0.000748 | 1 |
| ENSG0000 response | Inflamed | LTB       | protein_cc chr6  | 31548302 | 31550299 | - | 1535  | 972.2053 | 0        | -0.88981 | 0.210343 | -4.2303  | 5.22E-05 | 0.000748 | 1 |
| ENSG0000 response | Inflamed | XX-C283C7 | antisense chr22  | 50753060 | 50754437 | + | 531   | 2.505967 | 0.47494  | -0.64387 | 0.15221  | -4.23015 | 5.22E-05 | 0.000748 | 1 |

|                   |          |           |                  |          |          |   |       |          |          |          |          |          |          |          |   |
|-------------------|----------|-----------|------------------|----------|----------|---|-------|----------|----------|----------|----------|----------|----------|----------|---|
| ENSG0000 response | Inflamed | MYO1A     | protein_cc chr12 | 57422301 | 57444982 | - | 4438  | 8191.599 | 0        | 1.13385  | 0.268048 | 4.230024 | 5.22E-05 | 0.000748 | 1 |
| ENSG0000 response | Inflamed | STRADB    | protein_cc chr2  | 2.02E+08 | 2.02E+08 | + | 3242  | 1220.957 | 0        | 0.554721 | 0.131151 | 4.229621 | 5.23E-05 | 0.000749 | 1 |
| ENSG0000 response | Inflamed | CTA-384D  | lincRNA chr22    | 50980734 | 50981335 | - | 602   | 22.01671 | 0.038186 | -0.90986 | 0.215133 | -4.22928 | 5.24E-05 | 0.00075  | 1 |
| ENSG0000 response | Inflamed | KIF26B    | protein_cc chr1  | 2.45E+08 | 2.46E+08 | + | 14403 | 232.2768 | 0.02148  | -1.29501 | 0.306277 | -4.22823 | 5.26E-05 | 0.000752 | 1 |
| ENSG0000 response | Inflamed | FEZ1      | protein_cc chr11 | 1.25E+08 | 1.25E+08 | - | 5932  | 250.5251 | 0        | -0.73233 | 0.173223 | -4.22765 | 5.27E-05 | 0.000753 | 1 |
| ENSG0000 response | Inflamed | AC073133  | lincRNA chr7     | 1.56E+08 | 1.56E+08 | - | 432   | 6.539379 | 0.317422 | 0.781145 | 0.184862 | 4.225546 | 5.31E-05 | 0.000759 | 1 |
| ENSG0000 response | Inflamed | FOXB1     | protein_cc chr15 | 60296421 | 60353929 | + | 2330  | 1.357995 | 0.692124 | -0.50669 | 0.119952 | -4.22408 | 5.34E-05 | 0.000763 | 1 |
| ENSG0000 response | Inflamed | C1orf167  | protein_cc chr1  | 11821844 | 11849642 | + | 6505  | 25.96659 | 0.004773 | -0.82157 | 0.194516 | -4.22368 | 5.35E-05 | 0.000764 | 1 |
| ENSG0000 response | Inflamed | ST6GALNA  | protein_cc chr17 | 74620843 | 74639920 | - | 3448  | 15561.72 | 0        | 0.985703 | 0.233436 | 4.222584 | 5.37E-05 | 0.000766 | 1 |
| ENSG0000 response | Inflamed | SLC4A4    | protein_cc chr4  | 72053003 | 72437804 | + | 8361  | 4811.757 | 0        | 1.29538  | 0.306929 | 4.220448 | 5.41E-05 | 0.000772 | 1 |
| ENSG0000 response | Inflamed | AC005682  | processed_chr7   | 22893797 | 22901021 | + | 2450  | 24.00955 | 0.031026 | -0.83519 | 0.197902 | -4.22022 | 5.42E-05 | 0.000772 | 1 |
| ENSG0000 response | Inflamed | OR52K3P   | pseudoger chr11  | 4496043  | 4497123  | + | 1081  | 8.377088 | 0.322196 | -0.96489 | 0.228646 | -4.22    | 5.42E-05 | 0.000773 | 1 |
| ENSG0000 response | Inflamed | NXN       | protein_cc chr17 | 702553   | 883010   | - | 5881  | 913.7589 | 0        | -0.80967 | 0.191887 | -4.21951 | 5.43E-05 | 0.000774 | 1 |
| ENSG0000 response | Inflamed | ZNF57     | protein_cc chr19 | 2900896  | 2918474  | + | 2258  | 285.1122 | 0        | 0.663887 | 0.157438 | 4.216812 | 5.49E-05 | 0.000781 | 1 |
| ENSG0000 response | Inflamed | RAB17     | protein_cc chr2  | 2.38E+08 | 2.39E+08 | - | 4783  | 1106.73  | 0        | 0.764827 | 0.181397 | 4.216317 | 5.50E-05 | 0.000782 | 1 |
| ENSG0000 response | Inflamed | FSD1      | protein_cc chr19 | 4304597  | 4323840  | + | 3111  | 45.52029 | 0.002387 | -0.6044  | 0.14335  | -4.21624 | 5.50E-05 | 0.000782 | 1 |
| ENSG0000 response | Inflamed | RP11-219C | lincRNA chr17    | 76257430 | 76274573 | - | 2934  | 15.99045 | 0.140811 | -1.11695 | 0.264924 | -4.21611 | 5.50E-05 | 0.000782 | 1 |
| ENSG0000 response | Inflamed | FKBP10    | protein_cc chr17 | 39968932 | 39979465 | + | 4269  | 2254.73  | 0        | -0.76936 | 0.182488 | -4.21593 | 5.50E-05 | 0.000782 | 1 |
| ENSG0000 response | Inflamed | RP11-22C1 | antisense chr8   | 95649513 | 95651695 | - | 2183  | 73.17184 | 0.011933 | 0.826928 | 0.196177 | 4.215209 | 5.52E-05 | 0.000784 | 1 |
| ENSG0000 response | Inflamed | LAMA5     | protein_cc chr20 | 60883011 | 60942368 | - | 14705 | 3833.451 | 0        | -0.84231 | 0.199836 | -4.21499 | 5.52E-05 | 0.000784 | 1 |
| ENSG0000 response | Inflamed | SYT17     | protein_cc chr16 | 19179293 | 19279652 | + | 7534  | 170.8926 | 0        | 0.617641 | 0.146544 | 4.21473  | 5.53E-05 | 0.000784 | 1 |
| ENSG0000 response | Inflamed | CD247     | protein_cc chr1  | 1.67E+08 | 1.67E+08 | - | 4034  | 439.4893 | 0        | -0.60709 | 0.144079 | -4.21362 | 5.55E-05 | 0.000787 | 1 |
| ENSG0000 response | Inflamed | MYF6      | protein_cc chr12 | 81101277 | 81103253 | + | 1465  | 1.959427 | 0.677804 | -0.78272 | 0.185766 | -4.21349 | 5.56E-05 | 0.000787 | 1 |
| ENSG0000 response | Inflamed | CRIP2     | protein_cc chr14 | 1.06E+08 | 1.06E+08 | + | 4829  | 1600.06  | 0        | -0.79065 | 0.187685 | -4.21263 | 5.57E-05 | 0.000789 | 1 |
| ENSG0000 response | Inflamed | NGEF      | protein_cc chr2  | 2.34E+08 | 2.34E+08 | - | 4687  | 1231.427 | 0        | 0.728107 | 0.172882 | 4.211592 | 5.60E-05 | 0.000791 | 1 |
| ENSG0000 response | Inflamed | MRC2      | protein_cc chr17 | 60704762 | 60770958 | + | 6860  | 3645.883 | 0        | -0.84365 | 0.200317 | -4.21157 | 5.60E-05 | 0.000791 | 1 |
| ENSG0000 response | Inflamed | SNAP47    | protein_cc chr1  | 2.28E+08 | 2.28E+08 | + | 6542  | 823.0764 | 0        | -0.29933 | 0.071077 | -4.21136 | 5.60E-05 | 0.000791 | 1 |
| ENSG0000 response | Inflamed | CTD-3010I | lincRNA chr17    | 70638870 | 70640629 | + | 889   | 36.02625 | 0.011933 | 0.70629  | 0.167711 | 4.211345 | 5.60E-05 | 0.000791 | 1 |
| ENSG0000 response | Inflamed | CEP19     | protein_cc chr3  | 1.96E+08 | 1.96E+08 | - | 2201  | 79.40095 | 0.002387 | -0.77947 | 0.185104 | -4.21096 | 5.61E-05 | 0.000792 | 1 |
| ENSG0000 response | Inflamed | MT1E      | protein_cc chr16 | 56659387 | 56661024 | + | 1052  | 2008.379 | 0        | 0.775709 | 0.184228 | 4.210592 | 5.62E-05 | 0.000793 | 1 |
| ENSG0000 response | Inflamed | MPP4      | protein_cc chr2  | 2.03E+08 | 2.03E+08 | - | 4978  | 1.656325 | 0.668258 | -0.60897 | 0.144661 | -4.20964 | 5.64E-05 | 0.000795 | 1 |
| ENSG0000 response | Inflamed | AP000439  | lincRNA chr11    | 69291901 | 69294708 | - | 726   | 283.4893 | 0.009547 | 1.011562 | 0.240306 | 4.209467 | 5.64E-05 | 0.000795 | 1 |
| ENSG0000 response | Inflamed | NLRC4     | protein_cc chr2  | 32449522 | 32490923 | - | 3624  | 111.9952 | 0.002387 | -0.88149 | 0.209428 | -4.20906 | 5.65E-05 | 0.000796 | 1 |
| ENSG0000 response | Inflamed | UNC13A    | protein_cc chr19 | 17712137 | 17799401 | - | 11438 | 124.3604 | 0.011933 | -0.86901 | 0.206567 | -4.2069  | 5.69E-05 | 0.000802 | 1 |
| ENSG0000 response | Inflamed | MEOX2     | protein_cc chr7  | 15650837 | 15726437 | - | 2500  | 55.81146 | 0.026253 | -1.15282 | 0.274062 | -4.20641 | 5.71E-05 | 0.000803 | 1 |
| ENSG0000 response | Inflamed | EPHB1     | protein_cc chr3  | 1.34E+08 | 1.35E+08 | + | 6956  | 70.06205 | 0.019093 | -1.09087 | 0.259348 | -4.20621 | 5.71E-05 | 0.000803 | 1 |
| ENSG0000 response | Inflamed | CAPN5     | protein_cc chr11 | 76777979 | 76837201 | + | 6166  | 16599.91 | 0        | 0.674868 | 0.160451 | 4.206075 | 5.71E-05 | 0.000803 | 1 |
| ENSG0000 response | Inflamed | DGAT1     | protein_cc chr8  | 1.46E+08 | 1.46E+08 | - | 2425  | 6693.554 | 0        | 0.482504 | 0.114738 | 4.205279 | 5.73E-05 | 0.000805 | 1 |
| ENSG0000 response | Inflamed | AC112229  | lincRNA chr2     | 1.11E+08 | 1.11E+08 | - | 2774  | 121.1432 | 0.00716  | 0.670603 | 0.159472 | 4.205154 | 5.73E-05 | 0.000805 | 1 |
| ENSG0000 response | Inflamed | RIMBP3    | protein_cc chr22 | 20456003 | 20461786 | - | 5784  | 24.18616 | 0.026253 | -0.74824 | 0.178029 | -4.20288 | 5.78E-05 | 0.000811 | 1 |



|                   |          |           |                  |          |          |   |       |          |          |          |          |          |          |          |   |
|-------------------|----------|-----------|------------------|----------|----------|---|-------|----------|----------|----------|----------|----------|----------|----------|---|
| ENSG0000 response | Inflamed | ADAP1     | protein_cc chr7  | 937540   | 995043   | - | 5060  | 1986.745 | 0        | 0.475395 | 0.113114 | 4.202802 | 5.78E-05 | 0.000811 | 1 |
| ENSG0000 response | Inflamed | HAS1      | protein_cc chr19 | 52216365 | 52227247 | - | 2241  | 71.40095 | 0.109785 | -1.50306 | 0.357686 | -4.20217 | 5.80E-05 | 0.000813 | 1 |
| ENSG0000 response | Inflamed | NKX2-2    | protein_cc chr20 | 21491648 | 21494664 | - | 2092  | 44.06444 | 0.040573 | 1.119274 | 0.266365 | 4.202034 | 5.80E-05 | 0.000813 | 1 |
| ENSG0000 response | Inflamed | EAF2      | protein_cc chr3  | 1.22E+08 | 1.22E+08 | + | 1770  | 253.9356 | 0        | -0.75391 | 0.179428 | -4.20174 | 5.81E-05 | 0.000813 | 1 |
| ENSG0000 response | Inflamed | MMP14     | protein_cc chr14 | 23305766 | 23318236 | + | 4464  | 11833.18 | 0        | -0.71734 | 0.170791 | -4.20009 | 5.84E-05 | 0.000818 | 1 |
| ENSG0000 response | Inflamed | SSR4      | protein_cc chrX  | 1.53E+08 | 1.53E+08 | + | 4590  | 10562.49 | 0        | -0.67657 | 0.161097 | -4.1998  | 5.85E-05 | 0.000818 | 1 |
| ENSG0000 response | Inflamed | RP11-284F | lincRNA chr1     | 1.57E+08 | 1.57E+08 | - | 3222  | 128.9165 | 0.002387 | 0.702383 | 0.167288 | 4.19864  | 5.87E-05 | 0.000821 | 1 |
| ENSG0000 response | Inflamed | TBC1D10C  | protein_cc chr11 | 67171386 | 67177560 | + | 5010  | 1059.301 | 0        | -0.77247 | 0.18402  | -4.19777 | 5.89E-05 | 0.000824 | 1 |
| ENSG0000 response | Inflamed | CPNE2     | protein_cc chr16 | 57126449 | 57181878 | + | 7380  | 2577.453 | 0        | 0.396591 | 0.094485 | 4.197407 | 5.90E-05 | 0.000824 | 1 |
| ENSG0000 response | Inflamed | BHLHE22   | protein_cc chr8  | 65492814 | 65496181 | + | 3368  | 122.8401 | 0.019093 | -1.19263 | 0.284233 | -4.19595 | 5.93E-05 | 0.000828 | 1 |
| ENSG0000 response | Inflamed | TSPAN4    | protein_cc chr11 | 842808   | 867116   | + | 5841  | 1232.979 | 0        | -0.61258 | 0.146002 | -4.19568 | 5.94E-05 | 0.000828 | 1 |
| ENSG0000 response | Inflamed | CD9       | protein_cc chr12 | 6308881  | 6347425  | + | 3218  | 10377.51 | 0        | 0.465856 | 0.111033 | 4.195651 | 5.94E-05 | 0.000828 | 1 |
| ENSG0000 response | Inflamed | CDK14     | protein_cc chr7  | 90095738 | 90839905 | + | 6841  | 303.8377 | 0        | -0.99328 | 0.236775 | -4.19503 | 5.95E-05 | 0.00083  | 1 |
| ENSG0000 response | Inflamed | MT-RNR1   | Mt_rRNA chrM     | 648      | 1601     | + | 954   | 144218.2 | 0        | 0.753713 | 0.179693 | 4.194447 | 5.97E-05 | 0.000831 | 1 |
| ENSG0000 response | Inflamed | MRAP      | protein_cc chr21 | 33664124 | 33687095 | + | 1346  | 3.770883 | 0.429594 | -0.73783 | 0.17595  | -4.19339 | 5.99E-05 | 0.000834 | 1 |
| ENSG0000 response | Inflamed | IGLC2     | IG_C_gene chr22  | 23243156 | 23243617 | + | 462   | 43261.93 | 0        | -1.31248 | 0.312997 | -4.19327 | 5.99E-05 | 0.000834 | 1 |
| ENSG0000 response | Inflamed | AC009495  | lincRNA chr2     | 1.67E+08 | 1.67E+08 | - | 372   | 9.947494 | 0.090692 | 0.664987 | 0.15859  | 4.193111 | 6.00E-05 | 0.000834 | 1 |
| ENSG0000 response | Inflamed | DOC2A     | protein_cc chr16 | 30016830 | 30034591 | - | 6426  | 101.0406 | 0.004773 | 0.977179 | 0.233054 | 4.192932 | 6.00E-05 | 0.000834 | 1 |
| ENSG0000 response | Inflamed | CXCL3     | protein_cc chr4  | 74902306 | 74904524 | - | 2219  | 1581.253 | 0        | -1.25929 | 0.300345 | -4.19281 | 6.00E-05 | 0.000834 | 1 |
| ENSG0000 response | Inflamed | GABBR2    | protein_cc chr9  | 1.01E+08 | 1.01E+08 | - | 6007  | 17.51551 | 0.143198 | -1.00709 | 0.240285 | -4.19126 | 6.04E-05 | 0.000839 | 1 |
| ENSG0000 response | Inflamed | PSTPIP1   | protein_cc chr15 | 77285700 | 77329673 | + | 4468  | 393.8544 | 0.002387 | -0.67272 | 0.16054  | -4.19034 | 6.06E-05 | 0.000841 | 1 |
| ENSG0000 response | Inflamed | YBX2      | protein_cc chr17 | 7191571  | 7197934  | - | 4618  | 1243.516 | 0.00716  | 1.248763 | 0.29803  | 4.190055 | 6.07E-05 | 0.000841 | 1 |
| ENSG0000 response | Inflamed | HOPX      | protein_cc chr4  | 57514155 | 57548065 | - | 7759  | 137.494  | 0        | -0.67454 | 0.160992 | -4.18991 | 6.07E-05 | 0.000841 | 1 |
| ENSG0000 response | Inflamed | MOGAT2    | protein_cc chr11 | 75428864 | 75444003 | + | 4010  | 4104.37  | 0        | 1.267731 | 0.302605 | 4.189392 | 6.08E-05 | 0.000843 | 1 |
| ENSG0000 response | Inflamed | WNK4      | protein_cc chr17 | 40932696 | 40948954 | + | 5089  | 2131.1   | 0        | 1.157118 | 0.276228 | 4.188995 | 6.09E-05 | 0.000843 | 1 |
| ENSG0000 response | Inflamed | STAC      | protein_cc chr3  | 36421836 | 36589499 | + | 4396  | 16.90453 | 0.102625 | -0.91364 | 0.218122 | -4.18868 | 6.10E-05 | 0.000844 | 1 |
| ENSG0000 response | Inflamed | KRT7      | protein_cc chr12 | 52626304 | 52645970 | + | 4093  | 423.9618 | 0.002387 | -1.64763 | 0.3934   | -4.18819 | 6.11E-05 | 0.000845 | 1 |
| ENSG0000 response | Inflamed | RDH5      | protein_cc chr12 | 56114151 | 56118489 | + | 2983  | 223.3795 | 0        | 0.611921 | 0.146162 | 4.186609 | 6.14E-05 | 0.000849 | 1 |
| ENSG0000 response | Inflamed | ICOS      | protein_cc chr2  | 2.05E+08 | 2.05E+08 | + | 2645  | 108.3365 | 0.002387 | -0.99532 | 0.237742 | -4.18655 | 6.15E-05 | 0.000849 | 1 |
| ENSG0000 response | Inflamed | ULK3      | protein_cc chr15 | 75128457 | 75135687 | - | 3516  | 2562.227 | 0        | 0.325668 | 0.0778   | 4.18596  | 6.16E-05 | 0.00085  | 1 |
| ENSG0000 response | Inflamed | RP1-197B1 | lincRNA chr12    | 48099868 | 48136077 | + | 4024  | 39.44869 | 0        | -0.50736 | 0.121207 | -4.18593 | 6.16E-05 | 0.00085  | 1 |
| ENSG0000 response | Inflamed | MPST      | protein_cc chr22 | 37415676 | 37425863 | + | 6760  | 6021.069 | 0        | 0.455725 | 0.108872 | 4.185865 | 6.16E-05 | 0.00085  | 1 |
| ENSG0000 response | Inflamed | CLCA1     | protein_cc chr1  | 86934051 | 86965972 | + | 3340  | 61617.5  | 0        | 1.983099 | 0.473802 | 4.185498 | 6.17E-05 | 0.000851 | 1 |
| ENSG0000 response | Inflamed | TLE2      | protein_cc chr19 | 2997636  | 3047633  | - | 4038  | 1299.322 | 0        | 0.580483 | 0.138692 | 4.1854   | 6.17E-05 | 0.000851 | 1 |
| ENSG0000 response | Inflamed | TMEM154   | protein_cc chr4  | 1.54E+08 | 1.54E+08 | - | 11573 | 410.8067 | 0        | -1.0068  | 0.240574 | -4.18498 | 6.18E-05 | 0.000852 | 1 |
| ENSG0000 response | Inflamed | PRKCB     | protein_cc chr16 | 23847322 | 24231932 | + | 10037 | 1231.549 | 0        | -0.7731  | 0.184739 | -4.18482 | 6.19E-05 | 0.000852 | 1 |
| ENSG0000 response | Inflamed | UTS2R     | protein_cc chr17 | 80332153 | 80333462 | + | 1310  | 32.95704 | 0.0358   | -1.0024  | 0.239658 | -4.18263 | 6.24E-05 | 0.000858 | 1 |
| ENSG0000 response | Inflamed | RP11-467J | antisense chr16  | 53069602 | 53086785 | - | 464   | 10.75418 | 0.124105 | 0.744588 | 0.178022 | 4.182553 | 6.24E-05 | 0.000858 | 1 |
| ENSG0000 response | Inflamed | C1orf61   | protein_cc chr1  | 1.56E+08 | 1.56E+08 | - | 12314 | 20.03819 | 0.016706 | -0.80797 | 0.193192 | -4.1822  | 6.25E-05 | 0.000859 | 1 |
| ENSG0000 response | Inflamed | HIGD1A    | protein_cc chr3  | 42798669 | 42846023 | - | 1940  | 5513.659 | 0        | 0.575281 | 0.137572 | 4.181664 | 6.26E-05 | 0.00086  | 1 |

|                   |          |           |                  |          |          |   |       |          |          |          |          |          |          |          |   |
|-------------------|----------|-----------|------------------|----------|----------|---|-------|----------|----------|----------|----------|----------|----------|----------|---|
| ENSG0000 response | Inflamed | RP11-480I | pseudoger chr1   | 2.03E+08 | 2.03E+08 | - | 2958  | 81.2673  | 0.002387 | 0.716551 | 0.17136  | 4.181556 | 6.26E-05 | 0.00086  | 1 |
| ENSG0000 response | Inflamed | CCR8      | protein_cc chr3  | 39371197 | 39375171 | + | 1487  | 16.83771 | 0.145585 | -0.9664  | 0.231181 | -4.18029 | 6.29E-05 | 0.000864 | 1 |
| ENSG0000 response | Inflamed | ASGR2     | protein_cc chr17 | 7004641  | 7019019  | - | 2490  | 37.83771 | 0.004773 | -0.71721 | 0.171581 | -4.18001 | 6.30E-05 | 0.000864 | 1 |
| ENSG0000 response | Inflamed | CDH5      | protein_cc chr16 | 66400533 | 66438686 | + | 5961  | 1951.914 | 0        | -1.00125 | 0.239539 | -4.17989 | 6.30E-05 | 0.000864 | 1 |
| ENSG0000 response | Inflamed | CTC-297N  | antisense chr17  | 10633094 | 10718481 | + | 2102  | 66.49403 | 0        | 0.579896 | 0.138773 | 4.178728 | 6.33E-05 | 0.000867 | 1 |
| ENSG0000 response | Inflamed | AC034220  | processed_chr5   | 1.32E+08 | 1.32E+08 | - | 2856  | 134.8282 | 0        | 0.90245  | 0.215966 | 4.178666 | 6.33E-05 | 0.000867 | 1 |
| ENSG0000 response | Inflamed | SLC5A12   | protein_cc chr11 | 26688566 | 26744974 | - | 7544  | 39.47971 | 0.372315 | 0.964586 | 0.230851 | 4.178384 | 6.34E-05 | 0.000868 | 1 |
| ENSG0000 response | Inflamed | RNF215    | protein_cc chr22 | 30773835 | 30817760 | - | 3079  | 277.2387 | 0        | -0.45021 | 0.107776 | -4.17723 | 6.36E-05 | 0.000871 | 1 |
| ENSG0000 response | Inflamed | AC008984  | processed_chr19  | 54820182 | 54848439 | - | 1738  | 14.34606 | 0.272076 | -1.0878  | 0.260462 | -4.17642 | 6.38E-05 | 0.000873 | 1 |
| ENSG0000 response | Inflamed | SLC26A2   | protein_cc chr5  | 1.49E+08 | 1.49E+08 | + | 8606  | 17142.27 | 0        | 1.632259 | 0.390907 | 4.175565 | 6.40E-05 | 0.000875 | 1 |
| ENSG0000 response | Inflamed | EVA1B     | protein_cc chr1  | 36787632 | 36789755 | - | 1211  | 446.8138 | 0        | -0.80493 | 0.192784 | -4.17529 | 6.41E-05 | 0.000876 | 1 |
| ENSG0000 response | Inflamed | LRRK2     | protein_cc chr12 | 40590546 | 40763087 | + | 13465 | 318.2888 | 0.002387 | -1.12155 | 0.268644 | -4.17486 | 6.42E-05 | 0.000877 | 1 |
| ENSG0000 response | Inflamed | FAM65C    | protein_cc chr20 | 49202645 | 49308065 | - | 6009  | 875.1146 | 0        | -0.98146 | 0.235104 | -4.17458 | 6.43E-05 | 0.000877 | 1 |
| ENSG0000 response | Inflamed | LHFP      | protein_cc chr13 | 39917029 | 40177665 | - | 2327  | 668.9666 | 0        | -0.72578 | 0.173882 | -4.17398 | 6.44E-05 | 0.000879 | 1 |
| ENSG0000 response | Inflamed | ANXA1     | protein_cc chr9  | 75766673 | 75785309 | + | 4561  | 2694.931 | 0        | -0.96018 | 0.230056 | -4.17369 | 6.45E-05 | 0.000879 | 1 |
| ENSG0000 response | Inflamed | ZDHHC8P1  | pseudoger chr22  | 23732793 | 23744913 | - | 3269  | 68.44391 | 0.01432  | 1.100796 | 0.263763 | 4.173436 | 6.45E-05 | 0.00088  | 1 |
| ENSG0000 response | Inflamed | EFNA1     | protein_cc chr1  | 1.55E+08 | 1.55E+08 | + | 2539  | 2433.036 | 0        | 0.620516 | 0.148699 | 4.172964 | 6.47E-05 | 0.000881 | 1 |
| ENSG0000 response | Inflamed | HES5      | protein_cc chr1  | 2460184  | 2461684  | - | 1306  | 35.70644 | 0.004773 | 0.761149 | 0.182428 | 4.172324 | 6.48E-05 | 0.000882 | 1 |
| ENSG0000 response | Inflamed | RP11-532F | antisense chr15  | 41128006 | 41136585 | - | 1239  | 407.327  | 0        | 0.635693 | 0.152372 | 4.171994 | 6.49E-05 | 0.000882 | 1 |
| ENSG0000 response | Inflamed | JPH4      | protein_cc chr14 | 24037244 | 24048009 | - | 5307  | 36.03819 | 0.01432  | -0.72453 | 0.173668 | -4.17192 | 6.49E-05 | 0.000882 | 1 |
| ENSG0000 response | Inflamed | RP11-15H  | pseudoger chr19  | 23437855 | 23440741 | - | 2887  | 301.1217 | 0        | 0.564093 | 0.135213 | 4.171888 | 6.49E-05 | 0.000882 | 1 |
| ENSG0000 response | Inflamed | RP11-680C | protein_cc chr16 | 85391069 | 85393055 | + | 289   | 5.866348 | 0.124105 | -0.61775 | 0.148088 | -4.17151 | 6.50E-05 | 0.000883 | 1 |
| ENSG0000 response | Inflamed | SULT1A1   | protein_cc chr16 | 28616903 | 28634946 | - | 8523  | 1966.611 | 0        | 0.6965   | 0.166982 | 4.171106 | 6.51E-05 | 0.000884 | 1 |
| ENSG0000 response | Inflamed | TAPSAR1   | lincRNA chr6     | 32811863 | 32814272 | + | 1951  | 681.4726 | 0        | -0.49102 | 0.117745 | -4.17018 | 6.53E-05 | 0.000887 | 1 |
| ENSG0000 response | Inflamed | AFF2      | protein_cc chrX  | 1.48E+08 | 1.48E+08 | + | 14006 | 53.05967 | 0.045346 | -1.30833 | 0.313762 | -4.1698  | 6.54E-05 | 0.000887 | 1 |
| ENSG0000 response | Inflamed | EVA1A     | protein_cc chr2  | 75696428 | 75796848 | - | 2744  | 90.8568  | 0        | -0.85066 | 0.204023 | -4.16945 | 6.55E-05 | 0.000888 | 1 |
| ENSG0000 response | Inflamed | MKX       | protein_cc chr10 | 27961804 | 28034989 | - | 4106  | 16.04296 | 0.093079 | -0.95598 | 0.229331 | -4.16859 | 6.57E-05 | 0.000891 | 1 |
| ENSG0000 response | Inflamed | FAM172Bf  | pseudoger chr3   | 1.01E+08 | 1.01E+08 | + | 2295  | 4.431981 | 0.279236 | -0.64715 | 0.155261 | -4.16816 | 6.58E-05 | 0.000891 | 1 |
| ENSG0000 response | Inflamed | MAPKAPK   | lincRNA chr12    | 1.12E+08 | 1.12E+08 | - | 2287  | 387.6563 | 0        | 0.4282   | 0.102732 | 4.168107 | 6.58E-05 | 0.000891 | 1 |
| ENSG0000 response | Inflamed | COL22A1   | protein_cc chr8  | 1.4E+08  | 1.4E+08  | - | 7830  | 60.25776 | 0.047733 | -1.19136 | 0.285938 | -4.1665  | 6.62E-05 | 0.000896 | 1 |
| ENSG0000 response | Inflamed | RP11-634E | antisense chr1   | 2.48E+08 | 2.48E+08 | + | 1882  | 2.529833 | 0.53222  | 0.507253 | 0.121819 | 4.163978 | 6.69E-05 | 0.000903 | 1 |
| ENSG0000 response | Inflamed | FOXC1     | protein_cc chr6  | 1610681  | 1614127  | + | 3447  | 80.36993 | 0.01432  | -0.76457 | 0.183622 | -4.16383 | 6.69E-05 | 0.000903 | 1 |
| ENSG0000 response | Inflamed | HR        | protein_cc chr8  | 21971928 | 21990897 | - | 8784  | 3324.107 | 0        | 0.609929 | 0.146487 | 4.163719 | 6.69E-05 | 0.000903 | 1 |
| ENSG0000 response | Inflamed | TMEM125   | protein_cc chr1  | 43735665 | 43739673 | + | 2127  | 1437.504 | 0        | 0.743712 | 0.178621 | 4.163634 | 6.69E-05 | 0.000903 | 1 |
| ENSG0000 response | Inflamed | CLYBL     | protein_cc chr13 | 1E+08    | 1.01E+08 | + | 7826  | 451.2578 | 0        | 0.540164 | 0.129734 | 4.163622 | 6.69E-05 | 0.000903 | 1 |
| ENSG0000 response | Inflamed | IGHV3-11  | IG_V_gene chr14  | 1.07E+08 | 1.07E+08 | - | 471   | 7462.795 | 0        | -1.38431 | 0.332526 | -4.16302 | 6.71E-05 | 0.000905 | 1 |
| ENSG0000 response | Inflamed | C1QTNF1   | protein_cc chr17 | 77018896 | 77045870 | + | 4854  | 1424.377 | 0        | -0.67729 | 0.162692 | -4.163   | 6.71E-05 | 0.000905 | 1 |
| ENSG0000 response | Inflamed | AP001058  | lincRNA chr21    | 45626408 | 45627282 | - | 463   | 11.87112 | 0.038186 | -0.75395 | 0.181127 | -4.16254 | 6.72E-05 | 0.000906 | 1 |
| ENSG0000 response | Inflamed | RGS20     | protein_cc chr8  | 54764368 | 54871863 | + | 3192  | 1.412888 | 0.711217 | -0.58137 | 0.139717 | -4.16109 | 6.76E-05 | 0.00091  | 1 |
| ENSG0000 response | Inflamed | FCER1G    | protein_cc chr1  | 1.61E+08 | 1.61E+08 | + | 964   | 1762.422 | 0        | -0.73242 | 0.176021 | -4.16095 | 6.76E-05 | 0.00091  | 1 |

|                   |          |           |                  |          |          |   |       |          |          |          |          |          |          |          |   |
|-------------------|----------|-----------|------------------|----------|----------|---|-------|----------|----------|----------|----------|----------|----------|----------|---|
| ENSG0000 response | Inflamed | SLC1A3    | protein_cc chr5  | 36606457 | 36688436 | + | 6265  | 159.1384 | 0.002387 | -1.14821 | 0.276063 | -4.15923 | 6.81E-05 | 0.000916 | 1 |
| ENSG0000 response | Inflamed | HSH2D     | protein_cc chr19 | 16244838 | 16269386 | + | 3399  | 2116.874 | 0        | -0.4863  | 0.116929 | -4.15894 | 6.81E-05 | 0.000916 | 1 |
| ENSG0000 response | Inflamed | CHPF      | protein_cc chr2  | 2.2E+08  | 2.2E+08  | - | 3354  | 4487.754 | 0        | -0.47711 | 0.114722 | -4.15888 | 6.81E-05 | 0.000916 | 1 |
| ENSG0000 response | Inflamed | C1RL      | protein_cc chr12 | 7242183  | 7261869  | - | 5014  | 2022.492 | 0        | -0.41438 | 0.099645 | -4.15861 | 6.82E-05 | 0.000916 | 1 |
| ENSG0000 response | Inflamed | BCKDK     | protein_cc chr16 | 31117428 | 31124110 | + | 3871  | 2062.936 | 0        | -0.29854 | 0.071814 | -4.15709 | 6.86E-05 | 0.000921 | 1 |
| ENSG0000 response | Inflamed | IL33      | protein_cc chr9  | 6215805  | 6257983  | + | 3232  | 379.2768 | 0        | -0.98755 | 0.237576 | -4.15677 | 6.87E-05 | 0.000922 | 1 |
| ENSG0000 response | Inflamed | AC116366  | antisense chr5   | 1.32E+08 | 1.32E+08 | - | 999   | 10.95227 | 0.064439 | -0.75597 | 0.18188  | -4.15642 | 6.88E-05 | 0.000922 | 1 |
| ENSG0000 response | Inflamed | ZNF704    | protein_cc chr8  | 81540686 | 81787016 | - | 15008 | 939.1862 | 0        | 0.945809 | 0.227558 | 4.15635  | 6.88E-05 | 0.000922 | 1 |
| ENSG0000 response | Inflamed | TBX21     | protein_cc chr17 | 45810610 | 45823485 | + | 2614  | 119.5537 | 0.009547 | -0.7287  | 0.175321 | -4.15635 | 6.88E-05 | 0.000922 | 1 |
| ENSG0000 response | Inflamed | RP11-2231 | sense_ove chr2   | 2.32E+08 | 2.32E+08 | + | 598   | 21.01432 | 0.033413 | 0.858908 | 0.206656 | 4.156227 | 6.88E-05 | 0.000922 | 1 |
| ENSG0000 response | Inflamed | ATF5      | protein_cc chr19 | 50431959 | 50437192 | + | 2954  | 1825.372 | 0        | -0.39862 | 0.09594  | -4.1549  | 6.92E-05 | 0.000926 | 1 |
| ENSG0000 response | Inflamed | RIMKLA    | protein_cc chr1  | 42846466 | 42888249 | + | 8981  | 735.8401 | 0        | 0.992185 | 0.238847 | 4.15407  | 6.94E-05 | 0.000928 | 1 |
| ENSG0000 response | Inflamed | RP11-3421 | antisense chr1   | 43300352 | 43312093 | - | 1617  | 8.408115 | 0.033413 | -0.58577 | 0.141045 | -4.15307 | 6.96E-05 | 0.000931 | 1 |
| ENSG0000 response | Inflamed | HTR3C     | protein_cc chr3  | 1.84E+08 | 1.84E+08 | + | 1697  | 12.27446 | 0.307876 | 0.879461 | 0.211763 | 4.153048 | 6.96E-05 | 0.000931 | 1 |
| ENSG0000 response | Inflamed | RP11-8340 | pseudoger chr12  | 54470622 | 54475687 | - | 1390  | 19.91647 | 0.023866 | -0.71026 | 0.171051 | -4.15232 | 6.98E-05 | 0.000933 | 1 |
| ENSG0000 response | Inflamed | PPM1F     | protein_cc chr22 | 22273793 | 22307209 | - | 7318  | 2164.461 | 0        | -0.60163 | 0.144896 | -4.15212 | 6.99E-05 | 0.000933 | 1 |
| ENSG0000 response | Inflamed | C1orf210  | protein_cc chr1  | 43747554 | 43751288 | - | 1516  | 1502.623 | 0        | 0.90213  | 0.217322 | 4.151113 | 7.01E-05 | 0.000936 | 1 |
| ENSG0000 response | Inflamed | ALPK2     | protein_cc chr18 | 56148479 | 56296189 | - | 9431  | 156.7566 | 0.01432  | -1.36094 | 0.327939 | -4.14998 | 7.04E-05 | 0.000939 | 1 |
| ENSG0000 response | Inflamed | WDR45     | protein_cc chrX  | 48929385 | 48958108 | - | 4981  | 1198.661 | 0        | -0.32517 | 0.07836  | -4.14978 | 7.05E-05 | 0.000939 | 1 |
| ENSG0000 response | Inflamed | CYP7B1    | protein_cc chr8  | 65500320 | 65711318 | - | 2282  | 96.62053 | 0.016706 | -1.11981 | 0.26985  | -4.14976 | 7.05E-05 | 0.000939 | 1 |
| ENSG0000 response | Inflamed | ARHGAP15  | protein_cc chr2  | 1.44E+08 | 1.45E+08 | + | 7743  | 250.4893 | 0        | -0.71034 | 0.171203 | -4.14914 | 7.07E-05 | 0.00094  | 1 |
| ENSG0000 response | Inflamed | RP11-264E | lincRNA chr11    | 1.28E+08 | 1.28E+08 | - | 1157  | 2.658711 | 0.582339 | -0.82608 | 0.199099 | -4.14911 | 7.07E-05 | 0.00094  | 1 |
| ENSG0000 response | Inflamed | MLLT11    | protein_cc chr1  | 1.51E+08 | 1.51E+08 | + | 4072  | 65.04773 | 0        | -0.71897 | 0.173287 | -4.14902 | 7.07E-05 | 0.00094  | 1 |
| ENSG0000 response | Inflamed | CD68      | protein_cc chr17 | 7482785  | 7485429  | + | 2187  | 264.4391 | 0        | -0.41456 | 0.099924 | -4.14879 | 7.07E-05 | 0.00094  | 1 |
| ENSG0000 response | Inflamed | NPR1      | protein_cc chr1  | 1.54E+08 | 1.54E+08 | + | 5003  | 379.7828 | 0        | -0.82376 | 0.19856  | -4.14867 | 7.08E-05 | 0.00094  | 1 |
| ENSG0000 response | Inflamed | GLCCI1    | protein_cc chr7  | 8008425  | 8133902  | + | 6885  | 1112.389 | 0        | -0.90073 | 0.217116 | -4.1486  | 7.08E-05 | 0.00094  | 1 |
| ENSG0000 response | Inflamed | ZFAT      | protein_cc chr8  | 1.35E+08 | 1.36E+08 | - | 8900  | 450.1885 | 0        | -0.33297 | 0.080264 | -4.14841 | 7.08E-05 | 0.000941 | 1 |
| ENSG0000 response | Inflamed | RILPL1    | protein_cc chr12 | 1.24E+08 | 1.24E+08 | - | 3935  | 197.4654 | 0        | -0.50382 | 0.121477 | -4.14746 | 7.11E-05 | 0.000943 | 1 |
| ENSG0000 response | Inflamed | LY6K      | protein_cc chr8  | 1.44E+08 | 1.44E+08 | + | 4049  | 13.64439 | 0.085919 | -1.02013 | 0.245969 | -4.14741 | 7.11E-05 | 0.000943 | 1 |
| ENSG0000 response | Inflamed | SPR       | protein_cc chr2  | 73114489 | 73119287 | + | 1480  | 1605.418 | 0        | 0.391656 | 0.094443 | 4.147031 | 7.12E-05 | 0.000944 | 1 |
| ENSG0000 response | Inflamed | CTD-2547L | protein_cc chr14 | 91709103 | 91717426 | + | 787   | 20.42005 | 0.016706 | -0.64413 | 0.155327 | -4.14691 | 7.12E-05 | 0.000944 | 1 |
| ENSG0000 response | Inflamed | RP11-290F | lincRNA chr4     | 1.85E+08 | 1.85E+08 | - | 2768  | 504.2434 | 0        | -0.98568 | 0.23773  | -4.1462  | 7.14E-05 | 0.000946 | 1 |
| ENSG0000 response | Inflamed | RORC      | protein_cc chr1  | 1.52E+08 | 1.52E+08 | - | 6314  | 1247.835 | 0        | 0.520203 | 0.125495 | 4.145193 | 7.17E-05 | 0.000949 | 1 |
| ENSG0000 response | Inflamed | SLC6A7    | protein_cc chr5  | 1.5E+08  | 1.5E+08  | + | 4391  | 397.0263 | 0        | 0.960763 | 0.231781 | 4.14513  | 7.17E-05 | 0.000949 | 1 |
| ENSG0000 response | Inflamed | PSAT1     | protein_cc chr9  | 80912059 | 80945009 | + | 2188  | 466.8067 | 0.002387 | -0.7905  | 0.190714 | -4.14494 | 7.18E-05 | 0.000949 | 1 |
| ENSG0000 response | Inflamed | C3orf36   | protein_cc chr3  | 1.34E+08 | 1.34E+08 | - | 1665  | 65.07876 | 0.019093 | -0.81334 | 0.196225 | -4.14493 | 7.18E-05 | 0.000949 | 1 |
| ENSG0000 response | Inflamed | PLA2G4C   | protein_cc chr19 | 48551100 | 48614074 | - | 6613  | 287.6921 | 0        | -0.57351 | 0.138369 | -4.14477 | 7.18E-05 | 0.000949 | 1 |
| ENSG0000 response | Inflamed | KLK8      | protein_cc chr19 | 51499263 | 51505967 | - | 1865  | 32.44391 | 0.599045 | -1.78385 | 0.430457 | -4.14409 | 7.20E-05 | 0.000951 | 1 |
| ENSG0000 response | Inflamed | STAT5A    | protein_cc chr17 | 40439565 | 40463961 | + | 5756  | 2245.952 | 0        | -0.45778 | 0.110468 | -4.14397 | 7.20E-05 | 0.000951 | 1 |
| ENSG0000 response | Inflamed | RBPMS     | protein_cc chr8  | 30241944 | 30429778 | + | 8982  | 2334.346 | 0        | -0.53381 | 0.128824 | -4.14368 | 7.21E-05 | 0.000951 | 1 |

|                   |          |           |                  |          |          |   |       |          |          |          |          |          |          |          |   |
|-------------------|----------|-----------|------------------|----------|----------|---|-------|----------|----------|----------|----------|----------|----------|----------|---|
| ENSG0000 response | Inflamed | ZAR1L     | protein_cc chr13 | 32877837 | 32889481 | - | 1564  | 1.171838 | 0.684964 | -0.46984 | 0.113411 | -4.14284 | 7.23E-05 | 0.000954 | 1 |
| ENSG0000 response | Inflamed | RP11-426L | antisense chr1   | 1.13E+08 | 1.13E+08 | - | 449   | 1.243437 | 0.718377 | 0.437773 | 0.105682 | 4.142368 | 7.25E-05 | 0.000955 | 1 |
| ENSG0000 response | Inflamed | SVOP      | protein_cc chr12 | 1.09E+08 | 1.09E+08 | - | 3968  | 12.09308 | 0.073986 | 0.744607 | 0.179768 | 4.142037 | 7.25E-05 | 0.000955 | 1 |
| ENSG0000 response | Inflamed | IGHV3OR1  | IG_V_pseu chr16  | 33740804 | 33741266 | - | 360   | 2.190931 | 0.622912 | -0.67425 | 0.162799 | -4.14159 | 7.27E-05 | 0.000957 | 1 |
| ENSG0000 response | Inflamed | MT-TH     | Mt_tRNA chrM     | 12138    | 12206    | + | 69    | 15.36516 | 0.076372 | 0.874849 | 0.211257 | 4.141161 | 7.28E-05 | 0.000958 | 1 |
| ENSG0000 response | Inflamed | FDX1      | protein_cc chr11 | 1.1E+08  | 1.1E+08  | + | 3206  | 877.8759 | 0        | 0.294511 | 0.071126 | 4.14069  | 7.29E-05 | 0.000958 | 1 |
| ENSG0000 response | Inflamed | HMSD      | protein_cc chr18 | 61616535 | 61649008 | + | 1498  | 10.30072 | 0.114558 | -0.74349 | 0.17956  | -4.14063 | 7.29E-05 | 0.000958 | 1 |
| ENSG0000 response | Inflamed | SLC43A2   | protein_cc chr17 | 1472561  | 1532180  | - | 10618 | 2608.155 | 0        | -0.63099 | 0.152392 | -4.14056 | 7.29E-05 | 0.000958 | 1 |
| ENSG0000 response | Inflamed | RP11-444L | lincRNA chr12    | 24366190 | 24715524 | - | 1693  | 4.190931 | 0.260143 | -0.67552 | 0.163161 | -4.14021 | 7.30E-05 | 0.000959 | 1 |
| ENSG0000 response | Inflamed | CSMD2     | protein_cc chr1  | 33979609 | 34631443 | - | 18147 | 139.969  | 0.026253 | -1.07614 | 0.259935 | -4.14005 | 7.31E-05 | 0.000959 | 1 |
| ENSG0000 response | Inflamed | ISX       | protein_cc chr22 | 35462129 | 35483380 | + | 3384  | 2751.062 | 0.004773 | 1.528497 | 0.369226 | 4.139735 | 7.32E-05 | 0.00096  | 1 |
| ENSG0000 response | Inflamed | CMTM4     | protein_cc chr16 | 66648653 | 66730610 | - | 8117  | 8551.907 | 0        | 0.76854  | 0.185661 | 4.139486 | 7.32E-05 | 0.00096  | 1 |
| ENSG0000 response | Inflamed | NRIP3     | protein_cc chr11 | 9002123  | 9025596  | - | 4123  | 67.95704 | 0.002387 | -0.83218 | 0.201052 | -4.13913 | 7.33E-05 | 0.000961 | 1 |
| ENSG0000 response | Inflamed | TMEM106   | protein_cc chr17 | 41363854 | 41372061 | + | 3578  | 681.6158 | 0        | -0.47706 | 0.115261 | -4.1389  | 7.34E-05 | 0.000961 | 1 |
| ENSG0000 response | Inflamed | AC009014  | lincRNA chr5     | 1.36E+08 | 1.36E+08 | - | 1667  | 383.8926 | 0.009547 | 1.113035 | 0.268969 | 4.138157 | 7.36E-05 | 0.000964 | 1 |
| ENSG0000 response | Inflamed | TPPP2     | protein_cc chr14 | 21492268 | 21504435 | + | 2475  | 4.73031  | 0.334129 | 0.549629 | 0.132829 | 4.13788  | 7.37E-05 | 0.000964 | 1 |
| ENSG0000 response | Inflamed | FMO5      | protein_cc chr1  | 1.47E+08 | 1.47E+08 | - | 5988  | 1087.513 | 0        | 0.946233 | 0.228682 | 4.137775 | 7.37E-05 | 0.000964 | 1 |
| ENSG0000 response | Inflamed | FGF18     | protein_cc chr5  | 1.71E+08 | 1.71E+08 | + | 1986  | 10.65155 | 0.071599 | -0.73981 | 0.1788   | -4.13764 | 7.37E-05 | 0.000964 | 1 |
| ENSG0000 response | Inflamed | MTRNR2L1  | protein_cc chr3  | 96335981 | 96337000 | - | 1020  | 986.4224 | 0        | 0.769535 | 0.18601  | 4.137058 | 7.39E-05 | 0.000966 | 1 |
| ENSG0000 response | Inflamed | NLRP1     | protein_cc chr17 | 5402747  | 5522744  | - | 12811 | 1709.678 | 0        | -0.78358 | 0.189415 | -4.13682 | 7.40E-05 | 0.000966 | 1 |
| ENSG0000 response | Inflamed | RP11-191C | antisense chr1   | 51983981 | 52027301 | + | 476   | 31.93556 | 0.002387 | 0.649057 | 0.156923 | 4.136148 | 7.41E-05 | 0.000968 | 1 |
| ENSG0000 response | Inflamed | ANG       | protein_cc chr14 | 21152336 | 21167130 | + | 1430  | 605.7757 | 0        | 0.556968 | 0.134663 | 4.136001 | 7.42E-05 | 0.000968 | 1 |
| ENSG0000 response | Inflamed | NAT14     | protein_cc chr19 | 55996371 | 55998935 | + | 2163  | 198.4869 | 0        | -0.55353 | 0.133841 | -4.13569 | 7.43E-05 | 0.000968 | 1 |
| ENSG0000 response | Inflamed | HAGHL     | protein_cc chr16 | 776936   | 785525   | + | 4890  | 106.1313 | 0        | -0.6562  | 0.158677 | -4.13546 | 7.43E-05 | 0.000968 | 1 |
| ENSG0000 response | Inflamed | RP11-575A | antisense chr10  | 20359734 | 20380713 | - | 499   | 4.906921 | 0.322196 | 0.721099 | 0.174371 | 4.135436 | 7.43E-05 | 0.000968 | 1 |
| ENSG0000 response | Inflamed | CDKN2C    | protein_cc chr1  | 51426417 | 51440305 | + | 3318  | 458.9332 | 0        | -0.37035 | 0.089556 | -4.13535 | 7.44E-05 | 0.000968 | 1 |
| ENSG0000 response | Inflamed | PDGFB     | protein_cc chr22 | 39619364 | 39640756 | - | 3761  | 704.1957 | 0        | -0.79943 | 0.19332  | -4.13527 | 7.44E-05 | 0.000968 | 1 |
| ENSG0000 response | Inflamed | MT-TT     | Mt_tRNA chrM     | 15888    | 15953    | + | 66    | 184.3723 | 0.004773 | 0.73249  | 0.177138 | 4.135145 | 7.44E-05 | 0.000968 | 1 |
| ENSG0000 response | Inflamed | IGLV3-9   | IG_V_gene chr22  | 23161507 | 23162253 | + | 461   | 1270.706 | 0.002387 | -1.41193 | 0.341603 | -4.13323 | 7.50E-05 | 0.000975 | 1 |
| ENSG0000 response | Inflamed | LRR3B     | protein_cc chr3  | 26664297 | 26752267 | + | 3271  | 4.119332 | 0.508353 | 0.729719 | 0.176586 | 4.132369 | 7.52E-05 | 0.000977 | 1 |
| ENSG0000 response | Inflamed | NDUFA9    | protein_cc chr12 | 4758261  | 4798454  | + | 5362  | 733.5084 | 0        | 0.385524 | 0.093304 | 4.131893 | 7.53E-05 | 0.000978 | 1 |
| ENSG0000 response | Inflamed | BNC1      | protein_cc chr15 | 83924655 | 83953466 | - | 4795  | 12.20525 | 0.26969  | -1.16339 | 0.281598 | -4.13139 | 7.55E-05 | 0.00098  | 1 |
| ENSG0000 response | Inflamed | ACP5      | protein_cc chr19 | 11685475 | 11689823 | - | 2814  | 3924.811 | 0        | -0.5172  | 0.125194 | -4.13116 | 7.55E-05 | 0.00098  | 1 |
| ENSG0000 response | Inflamed | F2RL1     | protein_cc chr5  | 76114758 | 76131140 | + | 2958  | 3918.482 | 0        | 0.787204 | 0.190557 | 4.131071 | 7.56E-05 | 0.00098  | 1 |
| ENSG0000 response | Inflamed | RP11-708H | lincRNA chr17    | 47249257 | 47250608 | + | 1352  | 502.0167 | 0.042959 | 1.66455  | 0.402963 | 4.130773 | 7.56E-05 | 0.000981 | 1 |
| ENSG0000 response | Inflamed | AC026202  | antisense chr3   | 5198590  | 5229014  | - | 672   | 26.44153 | 0.004773 | -0.77349 | 0.187305 | -4.12959 | 7.60E-05 | 0.000984 | 1 |
| ENSG0000 response | Inflamed | ATF4P4    | pseudoger chr11  | 1.14E+08 | 1.14E+08 | + | 2136  | 5.632458 | 0.105012 | -0.54113 | 0.13104  | -4.12949 | 7.60E-05 | 0.000984 | 1 |
| ENSG0000 response | Inflamed | OVOL2     | protein_cc chr20 | 17937623 | 18039832 | - | 2175  | 446.5776 | 0.004773 | 0.749989 | 0.181637 | 4.129066 | 7.61E-05 | 0.000985 | 1 |
| ENSG0000 response | Inflamed | FAM3D     | protein_cc chr3  | 58619673 | 58652575 | - | 1640  | 11001.52 | 0        | 0.95692  | 0.231825 | 4.127776 | 7.65E-05 | 0.000989 | 1 |
| ENSG0000 response | Inflamed | HIF1A     | protein_cc chr14 | 62162231 | 62214976 | + | 5150  | 5049.045 | 0        | -0.79449 | 0.192481 | -4.12764 | 7.65E-05 | 0.000989 | 1 |

|                   |          |           |                  |          |          |   |       |          |          |          |          |          |          |          |   |
|-------------------|----------|-----------|------------------|----------|----------|---|-------|----------|----------|----------|----------|----------|----------|----------|---|
| ENSG0000 response | Inflamed | LY6D      | protein_cc chr8  | 1.44E+08 | 1.44E+08 | - | 1553  | 75.7852  | 0.367542 | -1.87379 | 0.453965 | -4.1276  | 7.65E-05 | 0.000989 | 1 |
| ENSG0000 response | Inflamed | MAFB      | protein_cc chr20 | 39314488 | 39317880 | - | 3393  | 1381.976 | 0        | -0.6393  | 0.154941 | -4.12608 | 7.70E-05 | 0.000994 | 1 |
| ENSG0000 response | Inflamed | PDLIM7    | protein_cc chr5  | 1.77E+08 | 1.77E+08 | - | 4407  | 1852.442 | 0        | -0.66871 | 0.16213  | -4.12452 | 7.74E-05 | 0.000999 | 1 |
| ENSG0000 response | Inflamed | SLC6A19   | protein_cc chr5  | 1201710  | 1225232  | + | 5276  | 1402.387 | 0.038186 | 2.063215 | 0.500233 | 4.12451  | 7.74E-05 | 0.000999 | 1 |
| ENSG0000 response | Inflamed | RP11-509E | sense_intr chr16 | 6106976  | 6142955  | + | 776   | 0.904535 | 0.76611  | 0.329514 | 0.0799   | 4.12409  | 7.75E-05 | 0.000999 | 1 |
| ENSG0000 response | Inflamed | SIGLEC18P | pseudoger chr19  | 51623244 | 51626222 | + | 909   | 1.410501 | 0.644391 | -0.46823 | 0.113537 | -4.12406 | 7.75E-05 | 0.000999 | 1 |
| ENSG0000 response | Inflamed | RNU6-5P   | snRNA chr2       | 1.75E+08 | 1.75E+08 | - | 107   | 0.918854 | 0.768496 | -0.35525 | 0.086142 | -4.12403 | 7.76E-05 | 0.000999 | 1 |
| ENSG0000 response | Inflamed | AC061992  | protein_cc chr17 | 76422409 | 76422834 | + | 426   | 11.13842 | 0.128878 | -0.99373 | 0.240985 | -4.1236  | 7.77E-05 | 0.001001 | 1 |
| ENSG0000 response | Inflamed | PPBP      | protein_cc chr4  | 74852755 | 74853914 | - | 715   | 7.961814 | 0.360382 | -1.07312 | 0.260359 | -4.12169 | 7.82E-05 | 0.001007 | 1 |
| ENSG0000 response | Inflamed | GLP2R     | protein_cc chr17 | 9725523  | 9795419  | + | 6052  | 351.895  | 0        | 0.933341 | 0.226466 | 4.121324 | 7.83E-05 | 0.001008 | 1 |
| ENSG0000 response | Inflamed | CASS4     | protein_cc chr20 | 54987168 | 55034396 | + | 4025  | 240.5131 | 0.004773 | -0.85908 | 0.208508 | -4.12012 | 7.87E-05 | 0.001012 | 1 |
| ENSG0000 response | Inflamed | DCTPP1    | protein_cc chr16 | 30434940 | 30441396 | - | 1581  | 1650.332 | 0        | 0.412333 | 0.100085 | 4.119833 | 7.88E-05 | 0.001013 | 1 |
| ENSG0000 response | Inflamed | CTA-929C  | lincRNA chr22    | 27706612 | 27713417 | + | 5052  | 3.202864 | 0.494033 | 0.609191 | 0.147892 | 4.119161 | 7.90E-05 | 0.001015 | 1 |
| ENSG0000 response | Inflamed | IGLV11-55 | IG_V_gene chr22  | 22556057 | 22556600 | + | 426   | 1.207637 | 0.718377 | -0.52461 | 0.127363 | -4.11905 | 7.90E-05 | 0.001015 | 1 |
| ENSG0000 response | Inflamed | ARL9      | protein_cc chr4  | 57371509 | 57390614 | + | 1258  | 6.522673 | 0.152745 | -0.72411 | 0.175816 | -4.1186  | 7.91E-05 | 0.001015 | 1 |
| ENSG0000 response | Inflamed | LSR       | protein_cc chr19 | 35739233 | 35758867 | + | 2916  | 11609.37 | 0        | 0.586086 | 0.142303 | 4.118583 | 7.91E-05 | 0.001015 | 1 |
| ENSG0000 response | Inflamed | CACNA2D2  | protein_cc chr3  | 50400233 | 50541675 | - | 6319  | 311.1384 | 0.002387 | 1.019331 | 0.247518 | 4.118209 | 7.92E-05 | 0.001016 | 1 |
| ENSG0000 response | Inflamed | PGD       | protein_cc chr1  | 10458649 | 10480201 | + | 3171  | 4354.248 | 0        | -0.37205 | 0.090351 | -4.11785 | 7.93E-05 | 0.001017 | 1 |
| ENSG0000 response | Inflamed | PRDM1     | protein_cc chr6  | 1.07E+08 | 1.07E+08 | + | 6369  | 2726.749 | 0        | -0.71338 | 0.173244 | -4.11775 | 7.94E-05 | 0.001017 | 1 |
| ENSG0000 response | Inflamed | RGS5      | protein_cc chr1  | 1.63E+08 | 1.63E+08 | - | 6812  | 3629.2   | 0        | -1.05951 | 0.25734  | -4.11715 | 7.96E-05 | 0.001019 | 1 |
| ENSG0000 response | Inflamed | PHTF1     | protein_cc chr1  | 1.14E+08 | 1.14E+08 | - | 7170  | 453.0048 | 0        | -0.60477 | 0.146927 | -4.11617 | 7.98E-05 | 0.001022 | 1 |
| ENSG0000 response | Inflamed | NECAP2    | protein_cc chr1  | 16767167 | 16786573 | + | 5559  | 2239.967 | 0        | -0.24429 | 0.059349 | -4.11607 | 7.99E-05 | 0.001022 | 1 |
| ENSG0000 response | Inflamed | VCAN      | protein_cc chr5  | 82767284 | 82878122 | + | 14831 | 2546.764 | 0        | -0.85889 | 0.208679 | -4.11584 | 7.99E-05 | 0.001022 | 1 |
| ENSG0000 response | Inflamed | TRIM46    | protein_cc chr1  | 1.55E+08 | 1.55E+08 | + | 4528  | 45.56325 | 0.009547 | -0.73844 | 0.179425 | -4.11562 | 8.00E-05 | 0.001023 | 1 |
| ENSG0000 response | Inflamed | PKIB      | protein_cc chr6  | 1.23E+08 | 1.23E+08 | + | 3270  | 1891.671 | 0        | 1.169012 | 0.284103 | 4.114744 | 8.03E-05 | 0.001025 | 1 |
| ENSG0000 response | Inflamed | ME3       | protein_cc chr11 | 86152150 | 86383678 | - | 3838  | 662.2005 | 0        | 0.398502 | 0.096858 | 4.114297 | 8.04E-05 | 0.001027 | 1 |
| ENSG0000 response | Inflamed | ZMYND10   | protein_cc chr3  | 50378541 | 50384283 | - | 4009  | 21.00955 | 0.00716  | -0.53695 | 0.130538 | -4.1134  | 8.07E-05 | 0.001029 | 1 |
| ENSG0000 response | Inflamed | SPINT1    | protein_cc chr15 | 41136216 | 41150405 | + | 3587  | 13434.04 | 0        | 0.573047 | 0.139338 | 4.112649 | 8.09E-05 | 0.001032 | 1 |
| ENSG0000 response | Inflamed | TOX2      | protein_cc chr20 | 42543504 | 42698256 | + | 3223  | 363.327  | 0        | -0.71021 | 0.172696 | -4.11252 | 8.09E-05 | 0.001032 | 1 |
| ENSG0000 response | Inflamed | RP11-285C | lincRNA chr10    | 45432956 | 45451173 | + | 425   | 3.491647 | 0.486874 | 0.625141 | 0.152059 | 4.111177 | 8.13E-05 | 0.001036 | 1 |
| ENSG0000 response | Inflamed | RASIP1    | protein_cc chr19 | 49223844 | 49243978 | - | 4149  | 500.0453 | 0        | -0.84874 | 0.206508 | -4.10995 | 8.17E-05 | 0.001041 | 1 |
| ENSG0000 response | Inflamed | IGKV5-2   | IG_V_gene chr2   | 89196748 | 89197300 | + | 408   | 260.4248 | 0.004773 | -1.32177 | 0.321614 | -4.10979 | 8.17E-05 | 0.001041 | 1 |
| ENSG0000 response | Inflamed | HOMER3    | protein_cc chr19 | 19040010 | 19052070 | - | 3422  | 310.3914 | 0        | -0.56953 | 0.138588 | -4.1095  | 8.18E-05 | 0.001041 | 1 |
| ENSG0000 response | Inflamed | FBXO6     | protein_cc chr1  | 11724181 | 11734411 | + | 1811  | 569.2482 | 0        | -0.48474 | 0.117961 | -4.10935 | 8.19E-05 | 0.001041 | 1 |
| ENSG0000 response | Inflamed | GNA12     | protein_cc chr7  | 2767746  | 2883958  | - | 6120  | 2952.974 | 0        | -0.42391 | 0.103162 | -4.10923 | 8.19E-05 | 0.001041 | 1 |
| ENSG0000 response | Inflamed | RAET1K    | pseudoger chr6   | 1.5E+08  | 1.5E+08  | - | 1896  | 2.868735 | 0.434368 | -0.61766 | 0.150341 | -4.10843 | 8.22E-05 | 0.001044 | 1 |
| ENSG0000 response | Inflamed | CD14      | protein_cc chr5  | 1.4E+08  | 1.4E+08  | - | 1886  | 3427.308 | 0        | -0.57335 | 0.139568 | -4.108   | 8.23E-05 | 0.001045 | 1 |
| ENSG0000 response | Inflamed | AC008984  | pseudoger chr19  | 54813047 | 54817309 | - | 404   | 2.515513 | 0.682578 | -0.78422 | 0.19092  | -4.10759 | 8.24E-05 | 0.001046 | 1 |
| ENSG0000 response | Inflamed | ZNF671    | protein_cc chr19 | 58231119 | 58238992 | - | 3532  | 209.0215 | 0        | -0.66084 | 0.160894 | -4.10727 | 8.25E-05 | 0.001047 | 1 |
| ENSG0000 response | Inflamed | SLC39A1   | protein_cc chr1  | 1.54E+08 | 1.54E+08 | - | 3246  | 3792.026 | 0        | -0.24458 | 0.059556 | -4.1068  | 8.27E-05 | 0.001048 | 1 |

|                   |          |           |            |       |          |          |   |      |          |          |          |          |          |          |          |   |
|-------------------|----------|-----------|------------|-------|----------|----------|---|------|----------|----------|----------|----------|----------|----------|----------|---|
| ENSG0000 response | Inflamed | IGLV3-12  | IG_V_gene  | chr22 | 23114317 | 23115079 | + | 360  | 69.70883 | 0.045346 | -1.20636 | 0.293785 | -4.10626 | 8.28E-05 | 0.00105  | 1 |
| ENSG0000 response | Inflamed | LL21NC02- | antisense  | chr21 | 46356218 | 46356869 | + | 652  | 12.12649 | 0.143198 | -0.8862  | 0.215843 | -4.10577 | 8.30E-05 | 0.001051 | 1 |
| ENSG0000 response | Inflamed | AC012507  | antisense  | chr2  | 2.32E+08 | 2.32E+08 | + | 2265 | 6.677804 | 0.181384 | 0.719439 | 0.175275 | 4.104634 | 8.33E-05 | 0.001055 | 1 |
| ENSG0000 response | Inflamed | GRAMD4    | protein_cc | chr22 | 46971909 | 47075688 | + | 4886 | 5246.093 | 0        | 0.510215 | 0.12437  | 4.102407 | 8.40E-05 | 0.001063 | 1 |
| ENSG0000 response | Inflamed | IP6K2     | protein_cc | chr3  | 48725436 | 48777786 | - | 5624 | 3219.933 | 0        | 0.382393 | 0.093213 | 4.102335 | 8.40E-05 | 0.001063 | 1 |
| ENSG0000 response | Inflamed | RRAD      | protein_cc | chr16 | 66955582 | 66959547 | - | 1709 | 129.6325 | 0        | -0.85946 | 0.209527 | -4.1019  | 8.42E-05 | 0.001064 | 1 |
| ENSG0000 response | Inflamed | RP11-1387 | lincRNA    | chr7  | 1.31E+08 | 1.31E+08 | + | 3198 | 23.64678 | 0.078759 | 1.07543  | 0.262224 | 4.101195 | 8.44E-05 | 0.001067 | 1 |
| ENSG0000 response | Inflamed | IGHV3-7   | IG_V_gene  | chr14 | 1.07E+08 | 1.07E+08 | - | 430  | 18426.45 | 0        | -1.22689 | 0.299166 | -4.10104 | 8.44E-05 | 0.001067 | 1 |
| ENSG0000 response | Inflamed | RP4-575N6 | sense_ove  | chr1  | 1.02E+08 | 1.02E+08 | + | 592  | 1.059666 | 0.732697 | -0.42102 | 0.102696 | -4.09964 | 8.49E-05 | 0.001072 | 1 |
| ENSG0000 response | Inflamed | NKG7      | protein_cc | chr19 | 51874860 | 51875969 | - | 935  | 417.8496 | 0        | -0.6626  | 0.161653 | -4.09892 | 8.51E-05 | 0.001074 | 1 |
| ENSG0000 response | Inflamed | IGKV1D-16 | IG_V_gene  | chr2  | 90139078 | 90139580 | + | 378  | 825.9021 | 0.002387 | -1.29388 | 0.315676 | -4.09874 | 8.52E-05 | 0.001074 | 1 |
| ENSG0000 response | Inflamed | CD274     | protein_cc | chr9  | 5450503  | 5470566  | + | 4108 | 542.1169 | 0        | -1.09707 | 0.267664 | -4.09868 | 8.52E-05 | 0.001074 | 1 |
| ENSG0000 response | Inflamed | SLFN11    | protein_cc | chr17 | 33677324 | 33700720 | - | 5982 | 1260.134 | 0        | -0.85324 | 0.208195 | -4.09829 | 8.53E-05 | 0.001075 | 1 |
| ENSG0000 response | Inflamed | KIF12     | protein_cc | chr9  | 1.17E+08 | 1.17E+08 | - | 2975 | 523.3079 | 0        | 0.689154 | 0.16822  | 4.09673  | 8.58E-05 | 0.00108  | 1 |
| ENSG0000 response | Inflamed | MESP2     | protein_cc | chr15 | 90303822 | 90321982 | + | 1780 | 37.2506  | 0.00716  | 0.700335 | 0.170952 | 4.096686 | 8.58E-05 | 0.00108  | 1 |
| ENSG0000 response | Inflamed | RP4-576H7 | pseudoger  | chr20 | 1497405  | 1538299  | - | 1720 | 2.078759 | 0.513126 | -0.54971 | 0.134203 | -4.0961  | 8.60E-05 | 0.001082 | 1 |
| ENSG0000 response | Inflamed | RP3-355L5 | lincRNA    | chr6  | 1.06E+08 | 1.06E+08 | - | 541  | 7.844869 | 0.047733 | 0.546888 | 0.133522 | 4.095859 | 8.61E-05 | 0.001082 | 1 |
| ENSG0000 response | Inflamed | AP001187  | pseudoger  | chr11 | 64657298 | 64657758 | - | 459  | 363.8449 | 0        | 1.037798 | 0.253379 | 4.095827 | 8.61E-05 | 0.001082 | 1 |
| ENSG0000 response | Inflamed | MIR155HC  | lincRNA    | chr21 | 26934221 | 26947480 | + | 1600 | 91.08831 | 0        | -0.97827 | 0.238851 | -4.09573 | 8.61E-05 | 0.001082 | 1 |
| ENSG0000 response | Inflamed | EPOR      | protein_cc | chr19 | 11488236 | 11495018 | - | 2724 | 147.315  | 0        | -0.52147 | 0.127352 | -4.09473 | 8.64E-05 | 0.001086 | 1 |
| ENSG0000 response | Inflamed | PF4       | protein_cc | chr4  | 74846794 | 74847841 | - | 604  | 77.52029 | 0.002387 | -1.02514 | 0.250386 | -4.09423 | 8.66E-05 | 0.001087 | 1 |
| ENSG0000 response | Inflamed | IGHV1-12  | IG_V_pseu  | chr14 | 1.07E+08 | 1.07E+08 | - | 205  | 28.04773 | 0.150358 | -0.98112 | 0.239637 | -4.09419 | 8.66E-05 | 0.001087 | 1 |
| ENSG0000 response | Inflamed | C1orf186  | protein_cc | chr1  | 2.06E+08 | 2.06E+08 | - | 2910 | 163.4845 | 0        | -0.72282 | 0.176553 | -4.09408 | 8.66E-05 | 0.001087 | 1 |
| ENSG0000 response | Inflamed | RP11-3261 | sense_intr | chr4  | 1.85E+08 | 1.85E+08 | - | 686  | 40.76372 | 0.00716  | -0.69544 | 0.169879 | -4.09373 | 8.67E-05 | 0.001087 | 1 |
| ENSG0000 response | Inflamed | RP11-75C9 | lincRNA    | chr9  | 8858130  | 8862255  | + | 2494 | 40.19093 | 0.002387 | 0.698437 | 0.170663 | 4.092492 | 8.71E-05 | 0.001092 | 1 |
| ENSG0000 response | Inflamed | AQPEP     | protein_cc | chr5  | 1.15E+08 | 1.15E+08 | + | 6636 | 7.630072 | 0.338902 | -1.11341 | 0.272106 | -4.09182 | 8.74E-05 | 0.001094 | 1 |
| ENSG0000 response | Inflamed | SDHD      | protein_cc | chr11 | 1.12E+08 | 1.12E+08 | + | 2126 | 2885.582 | 0        | 0.50951  | 0.124536 | 4.091282 | 8.75E-05 | 0.001096 | 1 |
| ENSG0000 response | Inflamed | TNFRSF1B  | protein_cc | chr1  | 12227060 | 12269285 | + | 3766 | 5794.85  | 0        | -0.66185 | 0.161777 | -4.09115 | 8.76E-05 | 0.001096 | 1 |
| ENSG0000 response | Inflamed | BMP3      | protein_cc | chr4  | 81952119 | 81978685 | + | 5734 | 475.0621 | 0.038186 | 1.985222 | 0.485282 | 4.090862 | 8.77E-05 | 0.001096 | 1 |
| ENSG0000 response | Inflamed | PPAP2C    | protein_cc | chr19 | 281040   | 291393   | - | 2306 | 2553.119 | 0        | 0.420038 | 0.102709 | 4.089594 | 8.81E-05 | 0.001101 | 1 |
| ENSG0000 response | Inflamed | LGALS12   | protein_cc | chr11 | 63273556 | 63284246 | + | 2270 | 56.41766 | 0.033413 | -1.03767 | 0.253755 | -4.08925 | 8.82E-05 | 0.001102 | 1 |
| ENSG0000 response | Inflamed | CTC-548K1 | lincRNA    | chr19 | 14416270 | 14481008 | - | 1016 | 3.183771 | 0.338902 | -0.55298 | 0.135261 | -4.08825 | 8.85E-05 | 0.001105 | 1 |
| ENSG0000 response | Inflamed | CLN3      | protein_cc | chr16 | 28477983 | 28506896 | - | 4736 | 1874.305 | 0        | 0.364871 | 0.089272 | 4.087193 | 8.89E-05 | 0.001109 | 1 |
| ENSG0000 response | Inflamed | PRDX6     | protein_cc | chr1  | 1.73E+08 | 1.73E+08 | + | 2367 | 11467.15 | 0        | 0.572452 | 0.140073 | 4.086802 | 8.90E-05 | 0.00111  | 1 |
| ENSG0000 response | Inflamed | ITGAL     | protein_cc | chr16 | 30483979 | 30534506 | + | 6472 | 2557.103 | 0        | -0.7237  | 0.177104 | -4.08628 | 8.92E-05 | 0.001112 | 1 |
| ENSG0000 response | Inflamed | CNP       | protein_cc | chr17 | 40118759 | 40129749 | + | 7426 | 3126.033 | 0        | -0.32412 | 0.079379 | -4.08317 | 9.02E-05 | 0.001124 | 1 |
| ENSG0000 response | Inflamed | PNLIPRP1  | protein_cc | chr10 | 1.18E+08 | 1.18E+08 | + | 4986 | 1.656325 | 0.689737 | 0.462269 | 0.113218 | 4.083014 | 9.02E-05 | 0.001124 | 1 |
| ENSG0000 response | Inflamed | RP11-2621 | pseudoger  | chrX  | 71364034 | 71381600 | + | 2269 | 9.587112 | 0.078759 | -0.75399 | 0.184677 | -4.08273 | 9.03E-05 | 0.001125 | 1 |
| ENSG0000 response | Inflamed | LYSMD2    | protein_cc | chr15 | 52015208 | 52043782 | - | 2074 | 327.7661 | 0        | -0.45533 | 0.111555 | -4.08168 | 9.07E-05 | 0.001129 | 1 |
| ENSG0000 response | Inflamed | SLC38A5   | protein_cc | chrX  | 48316920 | 48328644 | - | 4016 | 1283.504 | 0        | -0.5079  | 0.124451 | -4.08115 | 9.09E-05 | 0.00113  | 1 |

|                   |          |            |            |       |          |          |   |       |          |          |          |          |          |          |          |   |
|-------------------|----------|------------|------------|-------|----------|----------|---|-------|----------|----------|----------|----------|----------|----------|----------|---|
| ENSG0000 response | Inflamed | LINC00242  | lincRNA    | chr6  | 1.7E+08  | 1.7E+08  | - | 2418  | 17.03819 | 0.026253 | -0.64616 | 0.158347 | -4.08068 | 9.10E-05 | 0.001132 | 1 |
| ENSG0000 response | Inflamed | NAMPT      | protein_cc | chr7  | 1.06E+08 | 1.06E+08 | - | 9049  | 6681.869 | 0        | -0.99568 | 0.244009 | -4.08049 | 9.11E-05 | 0.001132 | 1 |
| ENSG0000 response | Inflamed | UBL4B      | protein_cc | chr1  | 1.11E+08 | 1.11E+08 | + | 1508  | 2.162291 | 0.689737 | -0.64418 | 0.157879 | -4.0802  | 9.12E-05 | 0.001133 | 1 |
| ENSG0000 response | Inflamed | RNF25      | protein_cc | chr2  | 2.2E+08  | 2.2E+08  | - | 2323  | 503.3699 | 0        | -0.23819 | 0.058394 | -4.07905 | 9.16E-05 | 0.001136 | 1 |
| ENSG0000 response | Inflamed | LINC00992  | lincRNA    | chr5  | 1.17E+08 | 1.17E+08 | + | 1144  | 40.78282 | 0.038186 | 1.002158 | 0.245685 | 4.079041 | 9.16E-05 | 0.001136 | 1 |
| ENSG0000 response | Inflamed | MTRNR2L6   | protein_cc | chr7  | 1.42E+08 | 1.42E+08 | + | 1447  | 9.508353 | 0.107399 | 0.745147 | 0.182679 | 4.079003 | 9.16E-05 | 0.001136 | 1 |
| ENSG0000 response | Inflamed | C4B        | protein_cc | chr6  | 31982539 | 32003195 | + | 7116  | 808.6158 | 0.002387 | -1.19602 | 0.293218 | -4.07895 | 9.16E-05 | 0.001136 | 1 |
| ENSG0000 response | Inflamed | SFRP2      | protein_cc | chr4  | 1.55E+08 | 1.55E+08 | - | 2032  | 408.9332 | 0.016706 | -1.81514 | 0.445348 | -4.07577 | 9.27E-05 | 0.001149 | 1 |
| ENSG0000 response | Inflamed | CD48       | protein_cc | chr1  | 1.61E+08 | 1.61E+08 | - | 2494  | 835.5632 | 0        | -0.6954  | 0.170668 | -4.07456 | 9.31E-05 | 0.001153 | 1 |
| ENSG0000 response | Inflamed | DHDDS      | protein_cc | chr1  | 26758773 | 26797785 | + | 5596  | 3437.024 | 0        | 0.357266 | 0.087704 | 4.073527 | 9.34E-05 | 0.001157 | 1 |
| ENSG0000 response | Inflamed | C9orf24    | protein_cc | chr9  | 34379017 | 34397830 | - | 1439  | 22.45346 | 0.011933 | 0.69493  | 0.170598 | 4.073494 | 9.35E-05 | 0.001157 | 1 |
| ENSG0000 response | Inflamed | LINC00656  | lincRNA    | chr20 | 23105705 | 23113258 | - | 1896  | 2.4821   | 0.417661 | -0.53321 | 0.130918 | -4.07282 | 9.37E-05 | 0.001159 | 1 |
| ENSG0000 response | Inflamed | DUOXA2     | protein_cc | chr15 | 45406519 | 45410619 | + | 2554  | 8410.351 | 0.002387 | -2.06718 | 0.507583 | -4.07259 | 9.38E-05 | 0.001159 | 1 |
| ENSG0000 response | Inflamed | RP11-750f1 | antisense  | chr11 | 47404699 | 47430741 | - | 1113  | 90.19093 | 0.00716  | -0.86512 | 0.212433 | -4.07243 | 9.38E-05 | 0.001159 | 1 |
| ENSG0000 response | Inflamed | PDZD3      | protein_cc | chr11 | 1.19E+08 | 1.19E+08 | + | 3827  | 1506.134 | 0.004773 | 1.163843 | 0.285793 | 4.072332 | 9.39E-05 | 0.001159 | 1 |
| ENSG0000 response | Inflamed | AP1M1      | protein_cc | chr19 | 16308389 | 16346160 | + | 3813  | 1584.492 | 0        | -0.41006 | 0.100694 | -4.0723  | 9.39E-05 | 0.001159 | 1 |
| ENSG0000 response | Inflamed | DNM3       | protein_cc | chr1  | 1.72E+08 | 1.72E+08 | + | 11346 | 77.27446 | 0        | -0.56973 | 0.139917 | -4.07194 | 9.40E-05 | 0.00116  | 1 |
| ENSG0000 response | Inflamed | TGM2       | protein_cc | chr20 | 36756863 | 36794980 | - | 6962  | 11936.68 | 0        | -0.90119 | 0.221326 | -4.07175 | 9.41E-05 | 0.00116  | 1 |
| ENSG0000 response | Inflamed | IRF5       | protein_cc | chr7  | 1.29E+08 | 1.29E+08 | + | 4375  | 729.3962 | 0        | -0.44712 | 0.109825 | -4.07119 | 9.42E-05 | 0.001162 | 1 |
| ENSG0000 response | Inflamed | NAB2       | protein_cc | chr12 | 57482677 | 57489259 | + | 3010  | 744.5322 | 0        | -0.63321 | 0.155573 | -4.07019 | 9.46E-05 | 0.001166 | 1 |
| ENSG0000 response | Inflamed | PPARG      | protein_cc | chr3  | 12328867 | 12475855 | + | 4046  | 1882.053 | 0        | 0.664999 | 0.1634   | 4.069761 | 9.47E-05 | 0.001167 | 1 |
| ENSG0000 response | Inflamed | PHGR1      | protein_cc | chr15 | 40643234 | 40648635 | + | 941   | 44210.04 | 0        | 1.22159  | 0.300193 | 4.069349 | 9.49E-05 | 0.001168 | 1 |
| ENSG0000 response | Inflamed | ZNF219     | protein_cc | chr14 | 21558205 | 21572881 | - | 4643  | 2537.408 | 0        | 0.419757 | 0.103152 | 4.069299 | 9.49E-05 | 0.001168 | 1 |
| ENSG0000 response | Inflamed | USP30      | protein_cc | chr12 | 1.09E+08 | 1.1E+08  | + | 5135  | 771.4726 | 0        | 0.458736 | 0.112739 | 4.069004 | 9.50E-05 | 0.001169 | 1 |
| ENSG0000 response | Inflamed | GLDC       | protein_cc | chr9  | 6532464  | 6645650  | - | 4656  | 142.7518 | 0        | -0.805   | 0.197867 | -4.0684  | 9.52E-05 | 0.001171 | 1 |
| ENSG0000 response | Inflamed | TMED1      | protein_cc | chr19 | 10943114 | 10946994 | - | 1513  | 436.9093 | 0        | -0.30486 | 0.074936 | -4.06825 | 9.53E-05 | 0.001171 | 1 |
| ENSG0000 response | Inflamed | DTX4       | protein_cc | chr11 | 58938903 | 58976060 | + | 6072  | 5949.203 | 0        | 0.4402   | 0.108234 | 4.067098 | 9.57E-05 | 0.001175 | 1 |
| ENSG0000 response | Inflamed | AC093642   | lincRNA    | chr2  | 2.43E+08 | 2.43E+08 | + | 2854  | 117.5394 | 0.004773 | 1.119109 | 0.275173 | 4.066932 | 9.57E-05 | 0.001176 | 1 |
| ENSG0000 response | Inflamed | COL15A1    | protein_cc | chr9  | 1.02E+08 | 1.02E+08 | + | 6637  | 5991.692 | 0        | -1.07984 | 0.26554  | -4.06659 | 9.59E-05 | 0.001176 | 1 |
| ENSG0000 response | Inflamed | CHRNA7     | protein_cc | chr15 | 32322691 | 32464722 | + | 5766  | 75.75179 | 0.01432  | 0.917679 | 0.225679 | 4.066306 | 9.60E-05 | 0.001177 | 1 |
| ENSG0000 response | Inflamed | DUSP22     | protein_cc | chr6  | 291630   | 351355   | + | 5686  | 1728.189 | 0        | -0.38886 | 0.095639 | -4.06587 | 9.61E-05 | 0.001177 | 1 |
| ENSG0000 response | Inflamed | P2RY4      | protein_cc | chrX  | 69478016 | 69479654 | - | 1639  | 18.80668 | 0.116945 | 0.969285 | 0.238396 | 4.065869 | 9.61E-05 | 0.001177 | 1 |
| ENSG0000 response | Inflamed | DESI1      | protein_cc | chr22 | 41994032 | 42017100 | - | 4972  | 2281.279 | 0        | -0.22865 | 0.056236 | -4.06579 | 9.61E-05 | 0.001177 | 1 |
| ENSG0000 response | Inflamed | IL21-AS1   | antisense  | chr4  | 1.24E+08 | 1.24E+08 | + | 3748  | 7.816229 | 0.317422 | -0.90977 | 0.223763 | -4.06578 | 9.61E-05 | 0.001177 | 1 |
| ENSG0000 response | Inflamed | RP11-109C  | antisense  | chr17 | 12663457 | 12693559 | - | 3679  | 14.82816 | 0.408115 | 0.951601 | 0.234054 | 4.065723 | 9.62E-05 | 0.001177 | 1 |
| ENSG0000 response | Inflamed | CDHR3      | protein_cc | chr7  | 1.06E+08 | 1.06E+08 | + | 9794  | 132.9809 | 0        | 0.696617 | 0.171345 | 4.065594 | 9.62E-05 | 0.001177 | 1 |
| ENSG0000 response | Inflamed | NRAP       | protein_cc | chr10 | 1.15E+08 | 1.15E+08 | - | 5721  | 56.10501 | 0.062053 | 1.302152 | 0.320315 | 4.065227 | 9.63E-05 | 0.001178 | 1 |
| ENSG0000 response | Inflamed | FBXO18     | protein_cc | chr10 | 5931535  | 5979556  | + | 6817  | 3876.079 | 0        | -0.32293 | 0.079481 | -4.06301 | 9.71E-05 | 0.001187 | 1 |
| ENSG0000 response | Inflamed | OR7E12P    | pseudoger  | chr11 | 3412010  | 3412982  | - | 973   | 1.560859 | 0.720764 | -0.62686 | 0.154291 | -4.06286 | 9.72E-05 | 0.001187 | 1 |
| ENSG0000 response | Inflamed | MIR200A    | miRNA      | chr1  | 1103243  | 1103332  | + | 90    | 22.6969  | 0.054893 | 0.831387 | 0.204663 | 4.062233 | 9.74E-05 | 0.001189 | 1 |

|                   |          |           |                  |          |          |   |       |          |          |          |          |          |          |          |   |
|-------------------|----------|-----------|------------------|----------|----------|---|-------|----------|----------|----------|----------|----------|----------|----------|---|
| ENSG0000 response | Inflamed | NDUFV1    | protein_cc chr11 | 67374323 | 67380006 | + | 4154  | 6506.757 | 0        | 0.291581 | 0.071779 | 4.062221 | 9.74E-05 | 0.001189 | 1 |
| ENSG0000 response | Inflamed | RP11-395E | processed_chr7   | 1.01E+08 | 1.01E+08 | - | 2552  | 1650.394 | 0        | 0.944106 | 0.232481 | 4.061008 | 9.78E-05 | 0.001194 | 1 |
| ENSG0000 response | Inflamed | PLCB2     | protein_cc chr15 | 40570377 | 40600136 | - | 7350  | 1709.01  | 0        | -0.61907 | 0.152493 | -4.05969 | 9.83E-05 | 0.001199 | 1 |
| ENSG0000 response | Inflamed | PIK3R6    | protein_cc chr17 | 8706041  | 8770994  | - | 3563  | 254.3389 | 0        | -0.52767 | 0.12998  | -4.05959 | 9.83E-05 | 0.001199 | 1 |
| ENSG0000 response | Inflamed | CTB-167B5 | lincRNA chr7     | 87900207 | 87903065 | - | 2859  | 51.85203 | 0.02148  | -0.93987 | 0.231531 | -4.05935 | 9.84E-05 | 0.001199 | 1 |
| ENSG0000 response | Inflamed | FXYD4     | protein_cc chr10 | 43867090 | 43871783 | + | 774   | 2.670644 | 0.508353 | 0.664474 | 0.163734 | 4.058252 | 9.88E-05 | 0.001203 | 1 |
| ENSG0000 response | Inflamed | RP13-494C | lincRNA chr4     | 25866503 | 25871172 | - | 762   | 1.852029 | 0.577566 | -0.52764 | 0.130018 | -4.05818 | 9.89E-05 | 0.001203 | 1 |
| ENSG0000 response | Inflamed | RP11-94L1 | lincRNA chr17    | 37913974 | 37920089 | - | 6116  | 1544.776 | 0        | -0.86571 | 0.213337 | -4.05792 | 9.89E-05 | 0.001204 | 1 |
| ENSG0000 response | Inflamed | S100Z     | protein_cc chr5  | 76145826 | 76217475 | + | 1951  | 8.797136 | 0.064439 | -0.70671 | 0.174163 | -4.05773 | 9.90E-05 | 0.001204 | 1 |
| ENSG0000 response | Inflamed | RAET1G    | protein_cc chr6  | 1.5E+08  | 1.5E+08  | - | 1486  | 9.811456 | 0.057279 | -0.73557 | 0.181296 | -4.05728 | 9.92E-05 | 0.001205 | 1 |
| ENSG0000 response | Inflamed | SETD9     | protein_cc chr5  | 56205087 | 56221359 | + | 2535  | 197.6778 | 0        | 0.475107 | 0.117101 | 4.057241 | 9.92E-05 | 0.001205 | 1 |
| ENSG0000 response | Inflamed | CARD17    | protein_cc chr11 | 1.05E+08 | 1.05E+08 | - | 466   | 4.582339 | 0.319809 | -0.75762 | 0.186775 | -4.0563  | 9.95E-05 | 0.001208 | 1 |
| ENSG0000 response | Inflamed | RAB7L1    | protein_cc chr1  | 2.06E+08 | 2.06E+08 | - | 3882  | 702.7136 | 0        | -0.60527 | 0.149219 | -4.05625 | 9.96E-05 | 0.001208 | 1 |
| ENSG0000 response | Inflamed | TINAG     | protein_cc chr6  | 54172657 | 54254950 | + | 2155  | 259.7589 | 0.009547 | 0.878806 | 0.216854 | 4.052531 | 0.000101 | 0.001223 | 1 |
| ENSG0000 response | Inflamed | AC002331  | lincRNA chr16    | 26596076 | 26606134 | - | 294   | 2.811456 | 0.5179   | -0.63923 | 0.157744 | -4.05232 | 0.000101 | 0.001223 | 1 |
| ENSG0000 response | Inflamed | WFDC2     | protein_cc chr20 | 44098346 | 44110172 | + | 1382  | 2200.683 | 0        | 1.183099 | 0.291957 | 4.0523   | 0.000101 | 0.001223 | 1 |
| ENSG0000 response | Inflamed | RP11-3B12 | antisense chr7   | 1.25E+08 | 1.25E+08 | + | 6304  | 2.990453 | 0.338902 | -0.49786 | 0.122859 | -4.05229 | 0.000101 | 0.001223 | 1 |
| ENSG0000 response | Inflamed | CYP2D6    | protein_cc chr22 | 42522501 | 42526908 | - | 2395  | 106.5704 | 0        | 0.941908 | 0.23244  | 4.05226  | 0.000101 | 0.001223 | 1 |
| ENSG0000 response | Inflamed | RP11-6111 | antisense chr6   | 39849580 | 39867847 | - | 6854  | 34.07876 | 0.033413 | -0.9001  | 0.222135 | -4.05204 | 0.000101 | 0.001224 | 1 |
| ENSG0000 response | Inflamed | FOXQ1     | protein_cc chr6  | 1312675  | 1314992  | + | 2318  | 307.1718 | 0.002387 | -1.02382 | 0.252673 | -4.05194 | 0.000101 | 0.001224 | 1 |
| ENSG0000 response | Inflamed | NMNAT2    | protein_cc chr1  | 1.83E+08 | 1.83E+08 | - | 7165  | 52.85442 | 0.0358   | -1.04129 | 0.257042 | -4.05107 | 0.000101 | 0.001227 | 1 |
| ENSG0000 response | Inflamed | BCAT2     | protein_cc chr19 | 49298319 | 49314286 | - | 4553  | 1359.274 | 0        | 0.406917 | 0.100449 | 4.050994 | 0.000101 | 0.001227 | 1 |
| ENSG0000 response | Inflamed | PKIA      | protein_cc chr8  | 79428374 | 79517502 | + | 4216  | 125.1098 | 0        | -0.78714 | 0.19434  | -4.05031 | 0.000102 | 0.001229 | 1 |
| ENSG0000 response | Inflamed | COPS7A    | protein_cc chr12 | 6832907  | 6841041  | + | 3113  | 1670.138 | 0        | -0.22218 | 0.054861 | -4.04986 | 0.000102 | 0.001231 | 1 |
| ENSG0000 response | Inflamed | RP13-1016 | lincRNA chr4     | 1552011  | 1552299  | + | 289   | 4.863962 | 0.24821  | -0.65851 | 0.162627 | -4.04919 | 0.000102 | 0.001233 | 1 |
| ENSG0000 response | Inflamed | PRRX1     | protein_cc chr1  | 1.71E+08 | 1.71E+08 | + | 8246  | 617.4105 | 0.002387 | -1.35302 | 0.334224 | -4.04823 | 0.000103 | 0.001237 | 1 |
| ENSG0000 response | Inflamed | SIGLEC15  | protein_cc chr18 | 43405477 | 43424045 | + | 3598  | 28.179   | 0.019093 | -0.76558 | 0.189118 | -4.04816 | 0.000103 | 0.001237 | 1 |
| ENSG0000 response | Inflamed | DSE       | protein_cc chr6  | 1.17E+08 | 1.17E+08 | + | 11498 | 738.5418 | 0        | -0.75798 | 0.187267 | -4.04758 | 0.000103 | 0.001239 | 1 |
| ENSG0000 response | Inflamed | BZRAP1-A5 | antisense chr17  | 56402811 | 56493127 | + | 3601  | 175.537  | 0.002387 | -0.80121 | 0.197958 | -4.04738 | 0.000103 | 0.001239 | 1 |
| ENSG0000 response | Inflamed | NID2      | protein_cc chr14 | 52471521 | 52535712 | - | 6158  | 1217.979 | 0        | -0.79172 | 0.195617 | -4.0473  | 0.000103 | 0.001239 | 1 |
| ENSG0000 response | Inflamed | TNK2-AS1  | antisense chr3   | 1.96E+08 | 1.96E+08 | + | 2096  | 9.918854 | 0.073986 | -0.68916 | 0.170288 | -4.04706 | 0.000103 | 0.001239 | 1 |
| ENSG0000 response | Inflamed | PTGS1     | protein_cc chr9  | 1.25E+08 | 1.25E+08 | + | 5607  | 2935.952 | 0        | -0.73617 | 0.181912 | -4.04683 | 0.000103 | 0.00124  | 1 |
| ENSG0000 response | Inflamed | HNF4A     | protein_cc chr20 | 42984340 | 43061485 | + | 5560  | 13506.55 | 0        | 0.958041 | 0.23676  | 4.04646  | 0.000103 | 0.001241 | 1 |
| ENSG0000 response | Inflamed | GRAMD3    | protein_cc chr5  | 1.26E+08 | 1.26E+08 | + | 5051  | 1201.594 | 0        | 0.654389 | 0.161793 | 4.044608 | 0.000104 | 0.001249 | 1 |
| ENSG0000 response | Inflamed | DNAH3     | protein_cc chr16 | 20944433 | 21170762 | - | 14960 | 101.7088 | 0.004773 | 0.836133 | 0.206762 | 4.043942 | 0.000104 | 0.001251 | 1 |
| ENSG0000 response | Inflamed | MDFI      | protein_cc chr6  | 41604620 | 41621984 | + | 2523  | 357.9379 | 0.002387 | -1.03059 | 0.254931 | -4.04263 | 0.000105 | 0.001257 | 1 |
| ENSG0000 response | Inflamed | IGHV4-31  | IG_V_gene chr14  | 1.07E+08 | 1.07E+08 | - | 426   | 3977.647 | 0.002387 | -1.44634 | 0.357803 | -4.0423  | 0.000105 | 0.001258 | 1 |
| ENSG0000 response | Inflamed | CDC42EP2  | protein_cc chr11 | 65082289 | 65089900 | + | 2452  | 1030.389 | 0        | -0.5762  | 0.142553 | -4.04198 | 0.000105 | 0.001259 | 1 |
| ENSG0000 response | Inflamed | NFKBIA    | protein_cc chr14 | 35870717 | 35873955 | - | 2373  | 4742.599 | 0        | -0.5542  | 0.137144 | -4.041   | 0.000105 | 0.001262 | 1 |
| ENSG0000 response | Inflamed | MAN2B1    | protein_cc chr19 | 12757325 | 12777556 | - | 5374  | 6293.907 | 0        | -0.38814 | 0.09605  | -4.04097 | 0.000105 | 0.001262 | 1 |



|                   |          |           |                  |          |          |   |       |          |          |          |          |          |          |          |   |
|-------------------|----------|-----------|------------------|----------|----------|---|-------|----------|----------|----------|----------|----------|----------|----------|---|
| ENSG0000 response | Inflamed | HOXB5     | protein_cc chr17 | 46668619 | 46671323 | - | 2041  | 964.7112 | 0        | 0.747266 | 0.184936 | 4.040671 | 0.000105 | 0.001263 | 1 |
| ENSG0000 response | Inflamed | RP11-44F2 | lincRNA chr4     | 76006912 | 76009927 | - | 1033  | 53.86635 | 0.011933 | 0.789267 | 0.195379 | 4.039681 | 0.000106 | 0.001267 | 1 |
| ENSG0000 response | Inflamed | ECH1      | protein_cc chr19 | 39306062 | 39322645 | - | 2467  | 3824.642 | 0        | 0.351042 | 0.086906 | 4.039342 | 0.000106 | 0.001268 | 1 |
| ENSG0000 response | Inflamed | FAM167A   | protein_cc chr8  | 11278972 | 11332224 | - | 5033  | 340.0263 | 0        | -0.90917 | 0.22516  | -4.0379  | 0.000106 | 0.001274 | 1 |
| ENSG0000 response | Inflamed | GADD45B   | protein_cc chr19 | 2476120  | 2478257  | + | 2138  | 763.4272 | 0        | -0.65529 | 0.162298 | -4.03761 | 0.000107 | 0.001275 | 1 |
| ENSG0000 response | Inflamed | SUGT1P    | pseudoger chr9   | 33503653 | 33510709 | - | 476   | 3.620525 | 0.274463 | -0.58244 | 0.144288 | -4.03668 | 0.000107 | 0.001279 | 1 |
| ENSG0000 response | Inflamed | RP5-1028k | lincRNA chr17    | 38673278 | 38683254 | + | 1198  | 46.22673 | 0.064439 | -1.18322 | 0.293207 | -4.03545 | 0.000107 | 0.001284 | 1 |
| ENSG0000 response | Inflamed | C4BPA     | protein_cc chr1  | 2.07E+08 | 2.07E+08 | + | 2441  | 605.9666 | 0        | -1.67452 | 0.415055 | -4.03444 | 0.000108 | 0.001288 | 1 |
| ENSG0000 response | Inflamed | AGXT      | protein_cc chr2  | 2.42E+08 | 2.42E+08 | + | 4459  | 47.78759 | 0.01432  | 1.078058 | 0.267216 | 4.034409 | 0.000108 | 0.001288 | 1 |
| ENSG0000 response | Inflamed | TMEM55A   | protein_cc chr8  | 92006024 | 92053292 | - | 3066  | 201.1504 | 0        | -0.64506 | 0.160015 | -4.03124 | 0.000109 | 0.001302 | 1 |
| ENSG0000 response | Inflamed | APH1A     | protein_cc chr1  | 1.5E+08  | 1.5E+08  | - | 3468  | 7935.289 | 0        | 0.247961 | 0.061511 | 4.031151 | 0.000109 | 0.001302 | 1 |
| ENSG0000 response | Inflamed | SH3BP5    | protein_cc chr3  | 15296360 | 15382875 | - | 4159  | 1274.26  | 0        | -0.78516 | 0.194777 | -4.03106 | 0.000109 | 0.001302 | 1 |
| ENSG0000 response | Inflamed | SNCG      | protein_cc chr10 | 88718375 | 88723017 | + | 1247  | 71.61098 | 0.002387 | -0.76838 | 0.190659 | -4.03014 | 0.00011  | 0.001305 | 1 |
| ENSG0000 response | Inflamed | RP11-103J | antisense chr20  | 10653576 | 10975572 | + | 1279  | 6.546539 | 0.140811 | 0.586705 | 0.145584 | 4.030004 | 0.00011  | 0.001305 | 1 |
| ENSG0000 response | Inflamed | LRFN1     | protein_cc chr19 | 39797208 | 39805976 | - | 3381  | 85.07637 | 0.01432  | -0.70598 | 0.17519  | -4.0298  | 0.00011  | 0.001306 | 1 |
| ENSG0000 response | Inflamed | TFAP2C    | protein_cc chr20 | 55204358 | 55214339 | + | 3112  | 138.8807 | 0.009547 | -1.02759 | 0.255018 | -4.02947 | 0.00011  | 0.001307 | 1 |
| ENSG0000 response | Inflamed | NRP1      | protein_cc chr10 | 33466420 | 33625190 | - | 11517 | 2338.613 | 0        | -0.6675  | 0.165695 | -4.02851 | 0.00011  | 0.001311 | 1 |
| ENSG0000 response | Inflamed | ATP1A1    | protein_cc chr1  | 1.17E+08 | 1.17E+08 | + | 7261  | 64364.04 | 0        | 0.544331 | 0.135149 | 4.027621 | 0.000111 | 0.001315 | 1 |
| ENSG0000 response | Inflamed | AP000344  | pseudoger chr22  | 23788785 | 23803020 | + | 795   | 26.05489 | 0.133652 | 0.974982 | 0.242132 | 4.026653 | 0.000111 | 0.001319 | 1 |
| ENSG0000 response | Inflamed | RP11-146I | protein_cc chr9  | 42409989 | 42474239 | + | 2248  | 2.75895  | 0.498807 | 0.567399 | 0.140923 | 4.026293 | 0.000111 | 0.00132  | 1 |
| ENSG0000 response | Inflamed | NUP210    | protein_cc chr3  | 13357737 | 13461809 | - | 8180  | 3536.58  | 0        | -0.66194 | 0.164458 | -4.02496 | 0.000112 | 0.001326 | 1 |
| ENSG0000 response | Inflamed | TTC39A    | protein_cc chr1  | 51752930 | 51810788 | - | 9362  | 2887.487 | 0        | 0.609499 | 0.151448 | 4.024471 | 0.000112 | 0.001327 | 1 |
| ENSG0000 response | Inflamed | RP11-502I | lincRNA chr15    | 67833410 | 67834942 | - | 1533  | 56.8401  | 0        | 0.563919 | 0.140133 | 4.02416  | 0.000112 | 0.001328 | 1 |
| ENSG0000 response | Inflamed | WDR66     | protein_cc chr12 | 1.22E+08 | 1.22E+08 | + | 16115 | 69.24821 | 0.00716  | -0.77084 | 0.191565 | -4.02392 | 0.000112 | 0.001329 | 1 |
| ENSG0000 response | Inflamed | DLG1-AS1  | antisense chr3   | 1.97E+08 | 1.97E+08 | + | 1694  | 7.319809 | 0.116945 | 0.632473 | 0.157195 | 4.023484 | 0.000112 | 0.00133  | 1 |
| ENSG0000 response | Inflamed | AC053503  | antisense chr2   | 2.2E+08  | 2.2E+08  | + | 1598  | 12.46062 | 0.069212 | 0.736376 | 0.183022 | 4.02344  | 0.000112 | 0.00133  | 1 |
| ENSG0000 response | Inflamed | MOBP      | protein_cc chr3  | 39508689 | 39570970 | + | 9237  | 14.57518 | 0.183771 | 0.830233 | 0.206371 | 4.023001 | 0.000112 | 0.001331 | 1 |
| ENSG0000 response | Inflamed | IRAK2     | protein_cc chr3  | 10206549 | 10285427 | + | 3483  | 481.3103 | 0        | -0.74362 | 0.184846 | -4.02288 | 0.000112 | 0.001331 | 1 |
| ENSG0000 response | Inflamed | PPAPDC3   | protein_cc chr9  | 1.34E+08 | 1.34E+08 | + | 2430  | 102.0286 | 0        | -0.71338 | 0.177345 | -4.02254 | 0.000113 | 0.001332 | 1 |
| ENSG0000 response | Inflamed | GZMH      | protein_cc chr14 | 25075686 | 25078905 | - | 951   | 64.67542 | 0.002387 | -0.7154  | 0.177868 | -4.02206 | 0.000113 | 0.001334 | 1 |
| ENSG0000 response | Inflamed | SLC16A5   | protein_cc chr17 | 73083822 | 73102257 | + | 3089  | 1325.136 | 0        | 0.401646 | 0.099891 | 4.020824 | 0.000113 | 0.00134  | 1 |
| ENSG0000 response | Inflamed | GNS       | protein_cc chr12 | 65107225 | 65153227 | - | 6284  | 6386.177 | 0        | -0.45762 | 0.113857 | -4.01923 | 0.000114 | 0.001347 | 1 |
| ENSG0000 response | Inflamed | CEND1     | protein_cc chr11 | 787104   | 790123   | - | 1649  | 14.26969 | 0.050119 | -0.82794 | 0.206005 | -4.01903 | 0.000114 | 0.001347 | 1 |
| ENSG0000 response | Inflamed | SLC37A4   | protein_cc chr11 | 1.19E+08 | 1.19E+08 | - | 6186  | 1933.112 | 0        | 0.355092 | 0.088367 | 4.018385 | 0.000114 | 0.00135  | 1 |
| ENSG0000 response | Inflamed | GSS       | protein_cc chr20 | 33516236 | 33543620 | - | 2325  | 2760.508 | 0        | 0.301762 | 0.075109 | 4.017675 | 0.000115 | 0.001352 | 1 |
| ENSG0000 response | Inflamed | RP11-274E | lincRNA chr9     | 71158457 | 71161505 | - | 526   | 6.75179  | 0.379475 | -0.98501 | 0.245177 | -4.01754 | 0.000115 | 0.001352 | 1 |
| ENSG0000 response | Inflamed | SIT1      | protein_cc chr9  | 35649292 | 35650937 | - | 1286  | 205.895  | 0        | -0.69165 | 0.172159 | -4.01753 | 0.000115 | 0.001352 | 1 |
| ENSG0000 response | Inflamed | MAPK12    | protein_cc chr22 | 50683879 | 50700254 | - | 9421  | 304.5919 | 0        | -0.55511 | 0.138207 | -4.01654 | 0.000115 | 0.001356 | 1 |
| ENSG0000 response | Inflamed | CASP4     | protein_cc chr11 | 1.05E+08 | 1.05E+08 | - | 7256  | 1541.778 | 0        | -0.64143 | 0.15975  | -4.01522 | 0.000116 | 0.001362 | 1 |
| ENSG0000 response | Inflamed | NDP       | protein_cc chrX  | 43808022 | 43832750 | - | 1833  | 17.09547 | 0.097852 | -1.08367 | 0.269934 | -4.01457 | 0.000116 | 0.001365 | 1 |

|                   |          |           |                  |          |          |   |       |          |          |          |          |          |          |          |   |
|-------------------|----------|-----------|------------------|----------|----------|---|-------|----------|----------|----------|----------|----------|----------|----------|---|
| ENSG0000 response | Inflamed | FAM110C   | protein_cc chr2  | 38814    | 46870    | - | 3968  | 873.3317 | 0        | 0.803747 | 0.200217 | 4.014387 | 0.000116 | 0.001365 | 1 |
| ENSG0000 response | Inflamed | CRB3      | protein_cc chr19 | 6463788  | 6467232  | + | 1592  | 1663.628 | 0        | 0.73564  | 0.183269 | 4.013999 | 0.000116 | 0.001367 | 1 |
| ENSG0000 response | Inflamed | GCG       | protein_cc chr2  | 1.63E+08 | 1.63E+08 | - | 2378  | 1251.821 | 0.002387 | 1.476603 | 0.367908 | 4.013515 | 0.000116 | 0.001368 | 1 |
| ENSG0000 response | Inflamed | MIR3646   | miRNA chr20      | 43036760 | 43036843 | + | 84    | 2.317422 | 0.463007 | 0.512494 | 0.127723 | 4.012548 | 0.000117 | 0.001373 | 1 |
| ENSG0000 response | Inflamed | DLGAP3    | protein_cc chr1  | 35331037 | 35395186 | - | 3977  | 36.17422 | 0.002387 | -0.58322 | 0.145375 | -4.01186 | 0.000117 | 0.001375 | 1 |
| ENSG0000 response | Inflamed | IGKV2D-25 | IG_V_gene chr2   | 89986322 | 89987079 | + | 390   | 1916.021 | 0        | -1.32414 | 0.33009  | -4.01145 | 0.000117 | 0.001377 | 1 |
| ENSG0000 response | Inflamed | PTGDS     | protein_cc chr9  | 1.4E+08  | 1.4E+08  | + | 2378  | 3761.22  | 0        | -1.33116 | 0.331954 | -4.01007 | 0.000118 | 0.001383 | 1 |
| ENSG0000 response | Inflamed | SIGLEC14  | protein_cc chr19 | 52145806 | 52150054 | - | 2082  | 206.0621 | 0.02864  | -1.00447 | 0.250565 | -4.00884 | 0.000118 | 0.001389 | 1 |
| ENSG0000 response | Inflamed | FSTL1     | protein_cc chr3  | 1.2E+08  | 1.2E+08  | - | 8727  | 5910.222 | 0        | -0.89129 | 0.222338 | -4.0087  | 0.000118 | 0.001389 | 1 |
| ENSG0000 response | Inflamed | PTPRF     | protein_cc chr1  | 43990858 | 44089343 | + | 10719 | 27418.13 | 0        | 0.734041 | 0.183132 | 4.008254 | 0.000119 | 0.001391 | 1 |
| ENSG0000 response | Inflamed | CTB-175P5 | lincRNA chr19    | 23582035 | 23598877 | - | 3296  | 227.9881 | 0.011933 | 1.060075 | 0.264485 | 4.008066 | 0.000119 | 0.001391 | 1 |
| ENSG0000 response | Inflamed | AMICA1    | protein_cc chr11 | 1.18E+08 | 1.18E+08 | - | 8587  | 1936.396 | 0        | -0.58009 | 0.144806 | -4.00597 | 0.00012  | 0.001401 | 1 |
| ENSG0000 response | Inflamed | IL27      | protein_cc chr16 | 28510683 | 28523372 | - | 1270  | 12.62291 | 0.155131 | -0.89824 | 0.224233 | -4.00583 | 0.00012  | 0.001401 | 1 |
| ENSG0000 response | Inflamed | RP11-138I | antisense chr17  | 16317838 | 16320003 | - | 2166  | 0.935561 | 0.768496 | -0.37091 | 0.092596 | -4.0057  | 0.00012  | 0.001401 | 1 |
| ENSG0000 response | Inflamed | RP11-493L | lincRNA chr12    | 47641907 | 47651322 | + | 510   | 7.116945 | 0.162291 | -0.7301  | 0.18227  | -4.00561 | 0.00012  | 0.001401 | 1 |
| ENSG0000 response | Inflamed | IGLV3-27  | IG_V_gene chr22  | 23010758 | 23011276 | + | 377   | 712.1408 | 0.002387 | -1.32268 | 0.330227 | -4.00537 | 0.00012  | 0.001401 | 1 |
| ENSG0000 response | Inflamed | SH2D7     | protein_cc chr15 | 78370150 | 78397251 | + | 2881  | 182.9618 | 0.023866 | 1.283557 | 0.320502 | 4.004829 | 0.00012  | 0.001404 | 1 |
| ENSG0000 response | Inflamed | ABHD14B   | protein_cc chr3  | 52002526 | 52017425 | - | 3161  | 3308.387 | 0        | 0.325306 | 0.081234 | 4.004529 | 0.00012  | 0.001404 | 1 |
| ENSG0000 response | Inflamed | RP11-264E | lincRNA chr11    | 1.28E+08 | 1.28E+08 | - | 897   | 2.128878 | 0.615752 | -0.70633 | 0.17641  | -4.00394 | 0.000121 | 0.001407 | 1 |
| ENSG0000 response | Inflamed | IYD       | protein_cc chr6  | 1.51E+08 | 1.51E+08 | + | 10362 | 811.1957 | 0.004773 | 1.037791 | 0.259204 | 4.003756 | 0.000121 | 0.001407 | 1 |
| ENSG0000 response | Inflamed | LRRN2     | protein_cc chr1  | 2.05E+08 | 2.05E+08 | - | 5681  | 610.3294 | 0        | 1.110972 | 0.277483 | 4.003749 | 0.000121 | 0.001407 | 1 |
| ENSG0000 response | Inflamed | SEMA6A    | protein_cc chr5  | 1.16E+08 | 1.16E+08 | - | 10956 | 3187.513 | 0        | 0.822117 | 0.205352 | 4.003463 | 0.000121 | 0.001407 | 1 |
| ENSG0000 response | Inflamed | LRP1B     | protein_cc chr2  | 1.41E+08 | 1.43E+08 | - | 17040 | 3.878282 | 0.529833 | -0.80197 | 0.200368 | -4.00247 | 0.000121 | 0.001412 | 1 |
| ENSG0000 response | Inflamed | CD300LB   | protein_cc chr17 | 72517313 | 72527613 | - | 2720  | 103.2888 | 0.002387 | -0.75601 | 0.18889  | -4.00237 | 0.000121 | 0.001412 | 1 |
| ENSG0000 response | Inflamed | CTD-2006I | lincRNA chr17    | 72595979 | 72603368 | + | 3602  | 16.56563 | 0.083532 | -0.88974 | 0.222317 | -4.00212 | 0.000121 | 0.001412 | 1 |
| ENSG0000 response | Inflamed | APH1B     | protein_cc chr15 | 63568217 | 63601325 | + | 5494  | 409.3246 | 0        | -0.49129 | 0.122778 | -4.00141 | 0.000122 | 0.001415 | 1 |
| ENSG0000 response | Inflamed | CREB5     | protein_cc chr7  | 28338940 | 28865511 | + | 11674 | 203.4129 | 0.002387 | -1.09003 | 0.272491 | -4.00022 | 0.000122 | 0.001421 | 1 |
| ENSG0000 response | Inflamed | FAM105A   | protein_cc chr5  | 14581884 | 14615116 | + | 4074  | 1695.117 | 0        | 0.617338 | 0.154334 | 4.000026 | 0.000122 | 0.001421 | 1 |
| ENSG0000 response | Inflamed | TMEM9B    | protein_cc chr11 | 8968841  | 8986558  | - | 3064  | 2067.239 | 0        | 0.3758   | 0.093959 | 3.999606 | 0.000122 | 0.001423 | 1 |
| ENSG0000 response | Inflamed | C10orf10  | protein_cc chr10 | 45466429 | 45474258 | - | 2979  | 1131.1   | 0        | -0.71446 | 0.178658 | -3.99903 | 0.000123 | 0.001425 | 1 |
| ENSG0000 response | Inflamed | DGUOK-AS1 | antisense chr2   | 74174769 | 74208568 | - | 865   | 39.84248 | 0.002387 | 0.689646 | 0.172479 | 3.998439 | 0.000123 | 0.001428 | 1 |
| ENSG0000 response | Inflamed | RP11-350J | antisense chr6   | 1.5E+08  | 1.5E+08  | + | 312   | 18.30549 | 0.174224 | -1.03237 | 0.258201 | -3.99833 | 0.000123 | 0.001428 | 1 |
| ENSG0000 response | Inflamed | TFF3      | protein_cc chr21 | 43731777 | 43735761 | - | 1164  | 23516.07 | 0        | 1.000272 | 0.25019  | 3.998044 | 0.000123 | 0.001428 | 1 |
| ENSG0000 response | Inflamed | MXRA5     | protein_cc chrX  | 3226606  | 3264682  | - | 9793  | 7582.747 | 0        | -0.85226 | 0.21317  | -3.99803 | 0.000123 | 0.001428 | 1 |
| ENSG0000 response | Inflamed | FLT4      | protein_cc chr5  | 1.8E+08  | 1.8E+08  | - | 8849  | 467.1384 | 0.002387 | -0.88974 | 0.222564 | -3.99768 | 0.000123 | 0.001429 | 1 |
| ENSG0000 response | Inflamed | C16orf86  | protein_cc chr16 | 67700719 | 67702661 | + | 1789  | 70.77088 | 0.002387 | -0.64075 | 0.160287 | -3.99751 | 0.000123 | 0.001429 | 1 |
| ENSG0000 response | Inflamed | MYL6B     | protein_cc chr12 | 56546040 | 56553431 | + | 3264  | 424.9881 | 0        | -0.47624 | 0.119142 | -3.99722 | 0.000123 | 0.00143  | 1 |
| ENSG0000 response | Inflamed | RP4-742C1 | pseudoger chr22  | 39487591 | 39488860 | + | 640   | 3.842482 | 0.279236 | -0.5746  | 0.14377  | -3.99669 | 0.000124 | 0.001432 | 1 |
| ENSG0000 response | Inflamed | ERBB3     | protein_cc chr12 | 56473641 | 56497289 | + | 8651  | 11497.56 | 0        | 0.818825 | 0.204996 | 3.994337 | 0.000125 | 0.001444 | 1 |
| ENSG0000 response | Inflamed | RP11-417E | lincRNA chr6     | 1.7E+08  | 1.7E+08  | - | 1054  | 5.023866 | 0.4821   | -0.95496 | 0.239082 | -3.9943  | 0.000125 | 0.001444 | 1 |

|                   |          |            |                  |          |          |   |       |          |          |          |          |          |          |          |   |
|-------------------|----------|------------|------------------|----------|----------|---|-------|----------|----------|----------|----------|----------|----------|----------|---|
| ENSG0000 response | Inflamed | CSAG1      | protein_cc chrX  | 1.52E+08 | 1.52E+08 | + | 1092  | 2.140811 | 0.601432 | -0.63221 | 0.15832  | -3.99323 | 0.000125 | 0.001449 | 1 |
| ENSG0000 response | Inflamed | ST6GALNA   | protein_cc chr9  | 1.31E+08 | 1.31E+08 | - | 5309  | 9264.091 | 0        | 0.735807 | 0.184275 | 3.992987 | 0.000125 | 0.001449 | 1 |
| ENSG0000 response | Inflamed | HIST1H2B   | protein_cc chr6  | 26115101 | 26124154 | - | 834   | 82.53461 | 0        | -0.76913 | 0.192642 | -3.99254 | 0.000126 | 0.00145  | 1 |
| ENSG0000 response | Inflamed | DOK1       | protein_cc chr2  | 74776153 | 74784681 | + | 3049  | 851.4988 | 0        | -0.3166  | 0.0793   | -3.99248 | 0.000126 | 0.00145  | 1 |
| ENSG0000 response | Inflamed | CSGALNAC   | protein_cc chr10 | 43633934 | 43680756 | + | 3752  | 775.7566 | 0        | -0.83773 | 0.209832 | -3.99237 | 0.000126 | 0.00145  | 1 |
| ENSG0000 response | Inflamed | EBF1       | protein_cc chr5  | 1.58E+08 | 1.59E+08 | - | 6161  | 179.0095 | 0.00716  | -0.89985 | 0.225398 | -3.99227 | 0.000126 | 0.00145  | 1 |
| ENSG0000 response | Inflamed | ELMO3      | protein_cc chr16 | 67233014 | 67237932 | + | 2575  | 2091.129 | 0        | 0.512482 | 0.128411 | 3.990942 | 0.000126 | 0.001457 | 1 |
| ENSG0000 response | Inflamed | AC092162   | lincRNA chr2     | 1.78E+08 | 1.78E+08 | - | 5290  | 1.23389  | 0.701671 | -0.51458 | 0.128959 | -3.99025 | 0.000127 | 0.00146  | 1 |
| ENSG0000 response | Inflamed | FAM83F     | protein_cc chr22 | 40390953 | 40439533 | + | 16389 | 2579.544 | 0        | 0.840306 | 0.21063  | 3.989496 | 0.000127 | 0.001463 | 1 |
| ENSG0000 response | Inflamed | GJC1       | protein_cc chr17 | 42875816 | 42908184 | - | 8660  | 287.6969 | 0.01432  | -1.03307 | 0.258962 | -3.98929 | 0.000127 | 0.001463 | 1 |
| ENSG0000 response | Inflamed | HDHD3      | protein_cc chr9  | 1.16E+08 | 1.16E+08 | - | 2105  | 3838.069 | 0        | 0.523733 | 0.131285 | 3.989279 | 0.000127 | 0.001463 | 1 |
| ENSG0000 response | Inflamed | PEX11A     | protein_cc chr15 | 90220995 | 90234014 | - | 3171  | 581.4487 | 0        | 0.630746 | 0.158123 | 3.988971 | 0.000127 | 0.001464 | 1 |
| ENSG0000 response | Inflamed | EFCAB4A    | protein_cc chr11 | 826144   | 831991   | + | 3913  | 1949.974 | 0        | 0.477534 | 0.119721 | 3.988724 | 0.000127 | 0.001465 | 1 |
| ENSG0000 response | Inflamed | DGKI       | protein_cc chr7  | 1.37E+08 | 1.38E+08 | - | 15547 | 16.14558 | 0.057279 | -0.82024 | 0.205653 | -3.98845 | 0.000127 | 0.001465 | 1 |
| ENSG0000 response | Inflamed | C9orf40    | protein_cc chr9  | 77561497 | 77567802 | - | 2327  | 474.9809 | 0        | 0.390326 | 0.097864 | 3.988447 | 0.000127 | 0.001465 | 1 |
| ENSG0000 response | Inflamed | CACNA1C    | protein_cc chr12 | 2079952  | 2802108  | + | 14095 | 498.2768 | 0        | -0.66916 | 0.167787 | -3.98812 | 0.000128 | 0.001466 | 1 |
| ENSG0000 response | Inflamed | EXD3       | protein_cc chr9  | 1.4E+08  | 1.4E+08  | - | 7626  | 898.6683 | 0        | 0.39035  | 0.097883 | 3.987911 | 0.000128 | 0.001466 | 1 |
| ENSG0000 response | Inflamed | LINC00924  | lincRNA chr15    | 95976324 | 96051076 | + | 2682  | 4.692124 | 0.341289 | -0.74818 | 0.187613 | -3.98789 | 0.000128 | 0.001466 | 1 |
| ENSG0000 response | Inflamed | CCM2L      | protein_cc chr20 | 30598245 | 30619984 | + | 2596  | 202.3126 | 0        | -0.65426 | 0.164072 | -3.98763 | 0.000128 | 0.001467 | 1 |
| ENSG0000 response | Inflamed | ATP5F1     | protein_cc chr1  | 1.12E+08 | 1.12E+08 | + | 3383  | 5225.353 | 0        | 0.367265 | 0.092104 | 3.987493 | 0.000128 | 0.001467 | 1 |
| ENSG0000 response | Inflamed | RP11-120k  | sense_intr chr13 | 1.14E+08 | 1.14E+08 | + | 647   | 3.749403 | 0.336516 | 0.628219 | 0.157588 | 3.986455 | 0.000128 | 0.001472 | 1 |
| ENSG0000 response | Inflamed | TMEM200    | protein_cc chr18 | 5882071  | 5895954  | - | 10638 | 111.1289 | 0.01432  | -0.8888  | 0.223004 | -3.98557 | 0.000129 | 0.001476 | 1 |
| ENSG0000 response | Inflamed | C17orf107  | protein_cc chr17 | 4802713  | 4806227  | + | 3408  | 181.6539 | 0        | -0.60518 | 0.151848 | -3.98542 | 0.000129 | 0.001476 | 1 |
| ENSG0000 response | Inflamed | KLKP1      | pseudoger chr19  | 51385352 | 51399654 | - | 1912  | 1.408115 | 0.75179  | 0.406005 | 0.101915 | 3.983769 | 0.00013  | 0.001484 | 1 |
| ENSG0000 response | Inflamed | RP11-256L  | antisense chr12  | 96390299 | 96405267 | + | 862   | 4.966587 | 0.50358  | -0.9367  | 0.235199 | -3.98261 | 0.00013  | 0.001489 | 1 |
| ENSG0000 response | Inflamed | VWA1       | protein_cc chr1  | 1370241  | 1378262  | + | 5065  | 4033.9   | 0        | -0.60996 | 0.15316  | -3.98251 | 0.00013  | 0.001489 | 1 |
| ENSG0000 response | Inflamed | COL5A3     | protein_cc chr19 | 10070237 | 10121147 | - | 6750  | 1311.957 | 0        | -0.93518 | 0.234833 | -3.98231 | 0.00013  | 0.001489 | 1 |
| ENSG0000 response | Inflamed | AC110619   | protein_cc chr2  | 2.41E+08 | 2.41E+08 | - | 2347  | 25.74702 | 0.088305 | 1.120864 | 0.281461 | 3.982311 | 0.00013  | 0.001489 | 1 |
| ENSG0000 response | Inflamed | CEBPB      | protein_cc chr20 | 48807376 | 48809212 | + | 1837  | 2711.088 | 0        | -0.79998 | 0.200906 | -3.98185 | 0.000131 | 0.001491 | 1 |
| ENSG0000 response | Inflamed | MKLN1-AS   | antisense chr7   | 1.31E+08 | 1.31E+08 | - | 4515  | 109.6229 | 0        | -0.73388 | 0.184314 | -3.98167 | 0.000131 | 0.001492 | 1 |
| ENSG0000 response | Inflamed | IL17REL    | protein_cc chr22 | 50432942 | 50451088 | - | 3696  | 378.1169 | 0.016706 | -1.37335 | 0.344943 | -3.98138 | 0.000131 | 0.001492 | 1 |
| ENSG0000 response | Inflamed | CARD9      | protein_cc chr9  | 1.39E+08 | 1.39E+08 | - | 6699  | 249.4582 | 0        | -0.54897 | 0.137904 | -3.98079 | 0.000131 | 0.001495 | 1 |
| ENSG0000 response | Inflamed | FCRL4      | protein_cc chr1  | 1.58E+08 | 1.58E+08 | - | 3875  | 51.358   | 0.081146 | -1.16342 | 0.292309 | -3.98009 | 0.000131 | 0.001498 | 1 |
| ENSG0000 response | Inflamed | ADAMTS4    | protein_cc chr1  | 1.61E+08 | 1.61E+08 | - | 10334 | 734.3628 | 0.00716  | -1.3603  | 0.341827 | -3.97951 | 0.000132 | 0.001501 | 1 |
| ENSG0000 response | Inflamed | ABHD8      | protein_cc chr19 | 17402940 | 17421045 | - | 2210  | 362.2196 | 0        | -0.48705 | 0.122394 | -3.97935 | 0.000132 | 0.001501 | 1 |
| ENSG0000 response | Inflamed | GPR183     | protein_cc chr13 | 99946784 | 99959659 | - | 1700  | 500.3126 | 0        | -0.75655 | 0.190156 | -3.97859 | 0.000132 | 0.001504 | 1 |
| ENSG0000 response | Inflamed | PLXDC1     | protein_cc chr17 | 37219556 | 37310647 | - | 9277  | 761.9308 | 0        | -0.91469 | 0.229938 | -3.97797 | 0.000132 | 0.001507 | 1 |
| ENSG0000 response | Inflamed | hsa-mir-11 | protein_cc chr19 | 14183348 | 14185874 | + | 2252  | 1010.255 | 0        | 0.523373 | 0.131573 | 3.977826 | 0.000132 | 0.001507 | 1 |
| ENSG0000 response | Inflamed | PRF1       | protein_cc chr10 | 72357104 | 72362531 | - | 2534  | 581.3986 | 0        | -0.6776  | 0.17037  | -3.97725 | 0.000133 | 0.001509 | 1 |
| ENSG0000 response | Inflamed | SIRPD      | protein_cc chr20 | 1514897  | 1539489  | - | 1961  | 3.797136 | 0.322196 | -0.66126 | 0.166262 | -3.97724 | 0.000133 | 0.001509 | 1 |

|                   |          |           |                  |          |          |   |      |          |          |          |          |          |          |          |   |
|-------------------|----------|-----------|------------------|----------|----------|---|------|----------|----------|----------|----------|----------|----------|----------|---|
| ENSG0000 response | Inflamed | MAST2     | protein_cc chr1  | 46252659 | 46501796 | + | 7877 | 6413.153 | 0        | 0.451636 | 0.113589 | 3.976054 | 0.000133 | 0.001515 | 1 |
| ENSG0000 response | Inflamed | WNT5A     | protein_cc chr3  | 55499743 | 55523973 | - | 6660 | 1618.136 | 0        | -1.11545 | 0.28057  | -3.97566 | 0.000134 | 0.001517 | 1 |
| ENSG0000 response | Inflamed | STAP1     | protein_cc chr4  | 68424446 | 68473055 | + | 1655 | 97.14797 | 0        | -0.88493 | 0.22266  | -3.97435 | 0.000134 | 0.001523 | 1 |
| ENSG0000 response | Inflamed | IL1RAP    | protein_cc chr3  | 1.9E+08  | 1.9E+08  | + | 9596 | 283.5179 | 0.002387 | -0.93889 | 0.236245 | -3.97425 | 0.000134 | 0.001523 | 1 |
| ENSG0000 response | Inflamed | TNNI2     | protein_cc chr11 | 1860219  | 1862910  | + | 1080 | 24.76372 | 0.002387 | -0.56207 | 0.141478 | -3.97281 | 0.000135 | 0.00153  | 1 |
| ENSG0000 response | Inflamed | AL122127. | lincRNA chr14    | 1.06E+08 | 1.06E+08 | + | 485  | 14.16706 | 0.066826 | -0.87253 | 0.219644 | -3.97248 | 0.000135 | 0.001531 | 1 |
| ENSG0000 response | Inflamed | DPF3      | protein_cc chr14 | 73086004 | 73360809 | - | 6868 | 294.7279 | 0        | 0.713581 | 0.179636 | 3.972371 | 0.000135 | 0.001531 | 1 |
| ENSG0000 response | Inflamed | AC011891  | lincRNA chr7     | 12693804 | 12694610 | + | 432  | 26.59666 | 0.114558 | 1.128143 | 0.284024 | 3.971998 | 0.000135 | 0.001533 | 1 |
| ENSG0000 response | Inflamed | CD74      | protein_cc chr5  | 1.5E+08  | 1.5E+08  | - | 3184 | 107875.7 | 0        | -0.53688 | 0.135169 | -3.97192 | 0.000135 | 0.001533 | 1 |
| ENSG0000 response | Inflamed | SHISA4    | protein_cc chr1  | 2.02E+08 | 2.02E+08 | + | 1746 | 158.2291 | 0        | -0.66939 | 0.168562 | -3.97118 | 0.000136 | 0.001536 | 1 |
| ENSG0000 response | Inflamed | RP11-1381 | lincRNA chr17    | 16343793 | 16344266 | - | 304  | 4.391408 | 0.198091 | 0.578879 | 0.145834 | 3.969426 | 0.000137 | 0.001545 | 1 |
| ENSG0000 response | Inflamed | ELF3      | protein_cc chr1  | 2.02E+08 | 2.02E+08 | + | 7191 | 18437.42 | 0        | 0.823876 | 0.207559 | 3.969364 | 0.000137 | 0.001545 | 1 |
| ENSG0000 response | Inflamed | ANKRD65   | protein_cc chr1  | 1353800  | 1357149  | - | 2644 | 158.1074 | 0        | -0.7831  | 0.197296 | -3.96918 | 0.000137 | 0.001545 | 1 |
| ENSG0000 response | Inflamed | SERPINB4  | protein_cc chr18 | 61304493 | 61311532 | - | 2013 | 44.95465 | 0.484487 | -1.87988 | 0.473625 | -3.96913 | 0.000137 | 0.001545 | 1 |
| ENSG0000 response | Inflamed | ATP5O     | protein_cc chr21 | 35275757 | 35288284 | - | 3336 | 2817.124 | 0        | 0.43077  | 0.108536 | 3.968899 | 0.000137 | 0.001545 | 1 |
| ENSG0000 response | Inflamed | LSM10     | protein_cc chr1  | 36856839 | 36863493 | - | 1496 | 614.4845 | 0        | -0.44533 | 0.112227 | -3.96809 | 0.000137 | 0.001549 | 1 |
| ENSG0000 response | Inflamed | MFSD12    | protein_cc chr19 | 3538259  | 3574288  | - | 5277 | 2531.442 | 0        | -0.42728 | 0.107687 | -3.9678  | 0.000137 | 0.00155  | 1 |
| ENSG0000 response | Inflamed | TAPBP     | protein_cc chr6  | 33267471 | 33282164 | - | 5056 | 15218.88 | 0        | -0.3684  | 0.092856 | -3.96742 | 0.000138 | 0.001552 | 1 |
| ENSG0000 response | Inflamed | STC2      | protein_cc chr5  | 1.73E+08 | 1.73E+08 | - | 6128 | 142.9714 | 0.01432  | -1.1696  | 0.294843 | -3.96685 | 0.000138 | 0.001554 | 1 |
| ENSG0000 response | Inflamed | DHH       | protein_cc chr12 | 49483204 | 49488602 | - | 1936 | 19.64916 | 0.045346 | -0.84932 | 0.214123 | -3.96649 | 0.000138 | 0.001556 | 1 |
| ENSG0000 response | Inflamed | HRH4      | protein_cc chr18 | 22040593 | 22059921 | + | 3668 | 23.34368 | 0.062053 | -1.00333 | 0.253064 | -3.96472 | 0.000139 | 0.001565 | 1 |
| ENSG0000 response | Inflamed | GTSF1L    | protein_cc chr20 | 42354804 | 42355638 | - | 835  | 2.317422 | 0.579952 | -0.57014 | 0.143811 | -3.96453 | 0.000139 | 0.001565 | 1 |
| ENSG0000 response | Inflamed | FBXO44    | protein_cc chr1  | 11714432 | 11723384 | + | 3527 | 425.6897 | 0        | -0.58604 | 0.147826 | -3.96436 | 0.000139 | 0.001566 | 1 |
| ENSG0000 response | Inflamed | LEF1      | protein_cc chr4  | 1.09E+08 | 1.09E+08 | - | 5361 | 455.8616 | 0        | -0.63836 | 0.161029 | -3.96425 | 0.000139 | 0.001566 | 1 |
| ENSG0000 response | Inflamed | SLC47A1   | protein_cc chr17 | 19398698 | 19482347 | + | 5719 | 141.0024 | 0        | -0.61149 | 0.154312 | -3.96271 | 0.00014  | 0.001573 | 1 |
| ENSG0000 response | Inflamed | ZBTB46    | protein_cc chr20 | 62375019 | 62462597 | - | 5955 | 516.716  | 0        | -0.57671 | 0.145537 | -3.9626  | 0.00014  | 0.001573 | 1 |
| ENSG0000 response | Inflamed | DNAJB7    | protein_cc chr22 | 41255553 | 41258130 | - | 2578 | 3.279236 | 0.501193 | 0.57983  | 0.146329 | 3.962501 | 0.00014  | 0.001573 | 1 |
| ENSG0000 response | Inflamed | CHST14    | protein_cc chr15 | 40763160 | 40765353 | + | 2194 | 519.3437 | 0        | -0.52623 | 0.132818 | -3.96205 | 0.00014  | 0.001575 | 1 |
| ENSG0000 response | Inflamed | KRT17     | protein_cc chr17 | 39775689 | 39781094 | - | 2537 | 240.7399 | 0.181384 | -1.94867 | 0.491878 | -3.96169 | 0.00014  | 0.001577 | 1 |
| ENSG0000 response | Inflamed | FAM155A   | protein_cc chr13 | 1.08E+08 | 1.09E+08 | - | 3478 | 55.63484 | 0.016706 | -0.96899 | 0.244664 | -3.96047 | 0.000141 | 0.001583 | 1 |
| ENSG0000 response | Inflamed | IGKV2-30  | IG_V_gene chr2   | 89544264 | 89545079 | - | 390  | 3627.06  | 0        | -1.15872 | 0.292611 | -3.95995 | 0.000141 | 0.001585 | 1 |
| ENSG0000 response | Inflamed | RP11-3661 | processed_chr4   | 1.66E+08 | 1.66E+08 | + | 3089 | 5.329356 | 0.329356 | -0.77993 | 0.196974 | -3.95957 | 0.000142 | 0.001587 | 1 |
| ENSG0000 response | Inflamed | RP11-465E | pseudoger chr1   | 995114   | 1004735  | + | 2171 | 11.76611 | 0.116945 | -0.89272 | 0.225467 | -3.95941 | 0.000142 | 0.001587 | 1 |
| ENSG0000 response | Inflamed | RP11-2761 | lincRNA chr9     | 89563614 | 89616948 | + | 4387 | 4.250597 | 0.298329 | -0.67761 | 0.171169 | -3.95869 | 0.000142 | 0.00159  | 1 |
| ENSG0000 response | Inflamed | LINC00922 | lincRNA chr16    | 65318402 | 65610203 | - | 2089 | 6.75179  | 0.391408 | -0.83488 | 0.210935 | -3.95798 | 0.000142 | 0.001594 | 1 |
| ENSG0000 response | Inflamed | FCGR2C    | polymorpt chr1   | 1.62E+08 | 1.62E+08 | + | 3178 | 147.4511 | 0.00716  | -1.00718 | 0.254601 | -3.95592 | 0.000143 | 0.001605 | 1 |
| ENSG0000 response | Inflamed | CCR4      | protein_cc chr3  | 32993066 | 32997841 | + | 3095 | 143.1742 | 0.016706 | -0.97963 | 0.247643 | -3.95581 | 0.000143 | 0.001605 | 1 |
| ENSG0000 response | Inflamed | TRPC4     | protein_cc chr13 | 38210773 | 38444562 | - | 4205 | 41.79236 | 0.026253 | -0.89142 | 0.225412 | -3.95462 | 0.000144 | 0.001611 | 1 |
| ENSG0000 response | Inflamed | SLC51B    | protein_cc chr15 | 65337708 | 65345734 | + | 940  | 854.0072 | 0.002387 | 1.151396 | 0.291167 | 3.954423 | 0.000144 | 0.001611 | 1 |
| ENSG0000 response | Inflamed | IGHV3-74  | IG_V_gene chr14  | 1.07E+08 | 1.07E+08 | - | 587  | 8907.32  | 0        | -1.18577 | 0.299867 | -3.95433 | 0.000144 | 0.001611 | 1 |

|                   |          |           |            |       |          |          |   |       |          |          |          |          |          |          |          |   |
|-------------------|----------|-----------|------------|-------|----------|----------|---|-------|----------|----------|----------|----------|----------|----------|----------|---|
| ENSG0000 response | Inflamed | RP11-875C | antisense  | chr8  | 22928890 | 22932001 | - | 881   | 6.861575 | 0.183771 | -0.73625 | 0.186189 | -3.95429 | 0.000144 | 0.001611 | 1 |
| ENSG0000 response | Inflamed | GPR27     | protein_cc | chr3  | 71803201 | 71805647 | + | 2447  | 68.82816 | 0.00716  | -0.8088  | 0.2046   | -3.95309 | 0.000145 | 0.001617 | 1 |
| ENSG0000 response | Inflamed | FMO1      | protein_cc | chr1  | 1.71E+08 | 1.71E+08 | + | 3574  | 52.63246 | 0.159905 | -1.52314 | 0.385328 | -3.95283 | 0.000145 | 0.001618 | 1 |
| ENSG0000 response | Inflamed | PACSIN3   | protein_cc | chr11 | 47199076 | 47207994 | - | 2752  | 148.2673 | 0        | -0.78302 | 0.198159 | -3.9515  | 0.000146 | 0.001625 | 1 |
| ENSG0000 response | Inflamed | NIPAL1    | protein_cc | chr4  | 47916159 | 48042188 | + | 5981  | 1251.017 | 0        | 0.973654 | 0.246469 | 3.950413 | 0.000146 | 0.001631 | 1 |
| ENSG0000 response | Inflamed | CHST8     | protein_cc | chr19 | 34112861 | 34264414 | + | 3052  | 13.55847 | 0.095465 | -0.94224 | 0.238523 | -3.95031 | 0.000146 | 0.001631 | 1 |
| ENSG0000 response | Inflamed | PANK1     | protein_cc | chr10 | 91342745 | 91405215 | - | 4127  | 726.0907 | 0        | 0.75778  | 0.191832 | 3.950223 | 0.000146 | 0.001631 | 1 |
| ENSG0000 response | Inflamed | C1QTNF6   | protein_cc | chr22 | 37576207 | 37595425 | - | 7143  | 1280.179 | 0        | -0.57144 | 0.144685 | -3.94955 | 0.000147 | 0.001634 | 1 |
| ENSG0000 response | Inflamed | BCL2L14   | protein_cc | chr12 | 12202778 | 12364018 | + | 5112  | 841.8449 | 0        | 0.771752 | 0.195409 | 3.949412 | 0.000147 | 0.001634 | 1 |
| ENSG0000 response | Inflamed | WSCD1     | protein_cc | chr17 | 5675554  | 6027747  | + | 9082  | 1431.129 | 0        | 0.924366 | 0.234052 | 3.949406 | 0.000147 | 0.001634 | 1 |
| ENSG0000 response | Inflamed | ZC3H12A   | protein_cc | chr1  | 37940153 | 37949980 | + | 3117  | 4171.401 | 0        | -0.67014 | 0.169688 | -3.94924 | 0.000147 | 0.001634 | 1 |
| ENSG0000 response | Inflamed | HTR3A     | protein_cc | chr11 | 1.14E+08 | 1.14E+08 | + | 2772  | 28.66348 | 0.121718 | -1.25683 | 0.318265 | -3.949   | 0.000147 | 0.001635 | 1 |
| ENSG0000 response | Inflamed | PRR5L     | protein_cc | chr11 | 36317838 | 36486754 | + | 6636  | 3182.785 | 0        | 0.623909 | 0.158033 | 3.947953 | 0.000148 | 0.00164  | 1 |
| ENSG0000 response | Inflamed | LINC00887 | lincRNA    | chr3  | 1.94E+08 | 1.94E+08 | - | 4153  | 1.551313 | 0.644391 | -0.46848 | 0.11867  | -3.94777 | 0.000148 | 0.00164  | 1 |
| ENSG0000 response | Inflamed | RP11-1841 | lincRNA    | chr4  | 1.29E+08 | 1.29E+08 | - | 1623  | 3.596659 | 0.560859 | -0.77888 | 0.19734  | -3.9469  | 0.000148 | 0.001645 | 1 |
| ENSG0000 response | Inflamed | POU4F1    | protein_cc | chr13 | 79172497 | 79177673 | - | 4525  | 10.73986 | 0.100239 | -0.75309 | 0.19083  | -3.9464  | 0.000148 | 0.001647 | 1 |
| ENSG0000 response | Inflamed | GYG2P1    | pseudoger  | chrY  | 14475147 | 14532255 | - | 2159  | 38.88067 | 0.412888 | 0.427568 | 0.108348 | 3.946257 | 0.000149 | 0.001647 | 1 |
| ENSG0000 response | Inflamed | NOS1AP    | protein_cc | chr1  | 1.62E+08 | 1.62E+08 | + | 8449  | 229.0668 | 0.00716  | 0.612845 | 0.155302 | 3.946142 | 0.000149 | 0.001647 | 1 |
| ENSG0000 response | Inflamed | MASP1     | protein_cc | chr3  | 1.87E+08 | 1.87E+08 | - | 12292 | 1342.337 | 0        | -1.41575 | 0.358855 | -3.94517 | 0.000149 | 0.001652 | 1 |
| ENSG0000 response | Inflamed | AIP       | protein_cc | chr11 | 67250512 | 67258574 | + | 1640  | 1141.544 | 0        | -0.32274 | 0.081808 | -3.94509 | 0.000149 | 0.001652 | 1 |
| ENSG0000 response | Inflamed | A1CF      | protein_cc | chr10 | 52559169 | 52645435 | - | 9603  | 997.21   | 0.004773 | 1.054193 | 0.26722  | 3.945039 | 0.000149 | 0.001652 | 1 |
| ENSG0000 response | Inflamed | AIF1      | protein_cc | chr6  | 31582961 | 31584798 | + | 1276  | 1017.535 | 0        | -0.62135 | 0.157513 | -3.94476 | 0.000149 | 0.001653 | 1 |
| ENSG0000 response | Inflamed | AFAP1L1   | protein_cc | chr5  | 1.49E+08 | 1.49E+08 | + | 4721  | 350.3031 | 0        | -0.69875 | 0.177158 | -3.94421 | 0.00015  | 0.001655 | 1 |
| ENSG0000 response | Inflamed | IFI35     | protein_cc | chr17 | 41158742 | 41166473 | + | 1973  | 1526.986 | 0        | -0.35648 | 0.090424 | -3.94235 | 0.000151 | 0.001665 | 1 |
| ENSG0000 response | Inflamed | KCTD16    | protein_cc | chr5  | 1.44E+08 | 1.44E+08 | + | 14294 | 3.465394 | 0.477327 | 0.85628  | 0.217205 | 3.942275 | 0.000151 | 0.001665 | 1 |
| ENSG0000 response | Inflamed | ADD2      | protein_cc | chr2  | 70834750 | 70995357 | - | 12673 | 56.21002 | 0.023866 | -0.89282 | 0.226482 | -3.94212 | 0.000151 | 0.001666 | 1 |
| ENSG0000 response | Inflamed | BTG2      | protein_cc | chr1  | 2.03E+08 | 2.03E+08 | + | 2757  | 11164.23 | 0        | -0.66515 | 0.168758 | -3.94145 | 0.000151 | 0.001669 | 1 |
| ENSG0000 response | Inflamed | PDSS1     | protein_cc | chr10 | 26986588 | 27035727 | + | 1959  | 482.4606 | 0        | 0.458742 | 0.116455 | 3.939217 | 0.000152 | 0.001682 | 1 |
| ENSG0000 response | Inflamed | CYP2B6    | protein_cc | chr19 | 41497204 | 41524303 | + | 3589  | 677.3699 | 0.01432  | 1.329245 | 0.337463 | 3.938941 | 0.000152 | 0.001683 | 1 |
| ENSG0000 response | Inflamed | ITIH1     | protein_cc | chr3  | 52811603 | 52826078 | + | 4543  | 6.959427 | 0.293556 | -0.79886 | 0.202826 | -3.93863 | 0.000153 | 0.001684 | 1 |
| ENSG0000 response | Inflamed | NLRP14    | protein_cc | chr11 | 7041677  | 7092539  | + | 3628  | 6.940334 | 0.176611 | -0.75367 | 0.191389 | -3.93789 | 0.000153 | 0.001688 | 1 |
| ENSG0000 response | Inflamed | RP11-701F | lincRNA    | chr4  | 1.86E+08 | 1.86E+08 | - | 795   | 4.732697 | 0.680191 | -0.95669 | 0.24295  | -3.93781 | 0.000153 | 0.001688 | 1 |
| ENSG0000 response | Inflamed | COL5A2    | protein_cc | chr2  | 1.9E+08  | 1.9E+08  | - | 7156  | 6239.294 | 0        | -0.88635 | 0.225106 | -3.93748 | 0.000153 | 0.001689 | 1 |
| ENSG0000 response | Inflamed | ABCG2     | protein_cc | chr4  | 89011416 | 89152474 | - | 4848  | 1398.375 | 0.002387 | 1.545694 | 0.392592 | 3.937148 | 0.000153 | 0.00169  | 1 |
| ENSG0000 response | Inflamed | C1orf162  | protein_cc | chr1  | 1.12E+08 | 1.12E+08 | + | 2768  | 351.6659 | 0        | -0.55644 | 0.141337 | -3.93695 | 0.000154 | 0.001691 | 1 |
| ENSG0000 response | Inflamed | DNAJC1    | protein_cc | chr10 | 22045466 | 22292698 | - | 2501  | 1181.649 | 0        | -0.39934 | 0.101437 | -3.93683 | 0.000154 | 0.001691 | 1 |
| ENSG0000 response | Inflamed | CCL1      | protein_cc | chr17 | 32687347 | 32690250 | - | 592   | 2.114558 | 0.613365 | -0.61316 | 0.15577  | -3.93633 | 0.000154 | 0.001693 | 1 |
| ENSG0000 response | Inflamed | KCNK5     | protein_cc | chr6  | 39156749 | 39197226 | - | 3756  | 2931.826 | 0        | 0.756658 | 0.192253 | 3.935742 | 0.000154 | 0.001696 | 1 |
| ENSG0000 response | Inflamed | KLHDC8B   | protein_cc | chr3  | 49209044 | 49213917 | + | 2156  | 409.4057 | 0        | -0.43746 | 0.111158 | -3.9355  | 0.000154 | 0.001696 | 1 |
| ENSG0000 response | Inflamed | IGHV3OR1  | IG_V_gene  | chr16 | 33629681 | 33630128 | + | 353   | 23.45585 | 0.057279 | -0.93441 | 0.237433 | -3.93548 | 0.000154 | 0.001696 | 1 |

|          |          |          |           |                  |          |          |   |       |          |          |          |          |          |          |          |   |
|----------|----------|----------|-----------|------------------|----------|----------|---|-------|----------|----------|----------|----------|----------|----------|----------|---|
| ENSG0000 | response | Inflamed | C4orf19   | protein_cc chr4  | 37455563 | 37625117 | + | 2770  | 1395.339 | 0.002387 | 0.803093 | 0.20411  | 3.934608 | 0.000155 | 0.001701 | 1 |
| ENSG0000 | response | Inflamed | RASGRP3   | protein_cc chr2  | 33661391 | 33789817 | + | 11118 | 547.7995 | 0        | -0.81146 | 0.206247 | -3.93439 | 0.000155 | 0.001701 | 1 |
| ENSG0000 | response | Inflamed | SPATS2    | protein_cc chr12 | 49760367 | 49921205 | + | 6838  | 934.179  | 0        | -0.55215 | 0.140343 | -3.93432 | 0.000155 | 0.001701 | 1 |
| ENSG0000 | response | Inflamed | RP11-798k | pseudoger chr5   | 1.79E+08 | 1.79E+08 | - | 290   | 19.35322 | 0.01432  | -0.59271 | 0.150686 | -3.93339 | 0.000156 | 0.001706 | 1 |
| ENSG0000 | response | Inflamed | CREG2     | protein_cc chr2  | 1.02E+08 | 1.02E+08 | - | 7150  | 10.71838 | 0.157518 | -1.02016 | 0.259373 | -3.93317 | 0.000156 | 0.001707 | 1 |
| ENSG0000 | response | Inflamed | AC109333  | antisense chr17  | 4922509  | 4923388  | - | 583   | 12.53461 | 0.071599 | -0.68975 | 0.17541  | -3.93221 | 0.000156 | 0.001712 | 1 |
| ENSG0000 | response | Inflamed | LINC00937 | lincRNA chr12    | 8448582  | 8549399  | - | 5663  | 34.71599 | 0.040573 | -1.01163 | 0.257305 | -3.93162 | 0.000157 | 0.001715 | 1 |
| ENSG0000 | response | Inflamed | RLTPR     | protein_cc chr16 | 67678822 | 67691472 | + | 7699  | 665.9308 | 0        | -0.85074 | 0.216541 | -3.92876 | 0.000158 | 0.001732 | 1 |
| ENSG0000 | response | Inflamed | UNC119    | protein_cc chr17 | 26873725 | 26879686 | - | 5128  | 1181.8   | 0        | -0.33521 | 0.085331 | -3.92839 | 0.000158 | 0.001733 | 1 |
| ENSG0000 | response | Inflamed | KIR2DL3   | protein_cc chr19 | 55249980 | 55295776 | + | 2484  | 2.424821 | 0.51074  | -0.53477 | 0.136138 | -3.92818 | 0.000158 | 0.001733 | 1 |
| ENSG0000 | response | Inflamed | LINC01071 | lincRNA chr13    | 44974386 | 44980120 | - | 1334  | 32.68974 | 0.02148  | 0.690366 | 0.175748 | 3.928165 | 0.000158 | 0.001733 | 1 |
| ENSG0000 | response | Inflamed | KSR2      | protein_cc chr12 | 1.18E+08 | 1.18E+08 | - | 18298 | 198.9117 | 0.002387 | 0.97648  | 0.248601 | 3.927895 | 0.000159 | 0.001734 | 1 |
| ENSG0000 | response | Inflamed | SLC4A9    | protein_cc chr5  | 1.4E+08  | 1.4E+08  | + | 3635  | 10.73747 | 0.138425 | 0.737788 | 0.187871 | 3.92709  | 0.000159 | 0.001738 | 1 |
| ENSG0000 | response | Inflamed | DDC       | protein_cc chr7  | 50526134 | 50633154 | - | 3119  | 1493.537 | 0.004773 | 0.986887 | 0.251302 | 3.927087 | 0.000159 | 0.001738 | 1 |
| ENSG0000 | response | Inflamed | AC011893  | antisense chr2   | 1.37E+08 | 1.37E+08 | + | 1862  | 1.460621 | 0.682578 | -0.45016 | 0.114653 | -3.92628 | 0.00016  | 0.001742 | 1 |
| ENSG0000 | response | Inflamed | CCL2      | protein_cc chr17 | 32582304 | 32584222 | + | 1137  | 1229.821 | 0        | -0.93968 | 0.239344 | -3.92605 | 0.00016  | 0.001743 | 1 |
| ENSG0000 | response | Inflamed | PREB      | protein_cc chr2  | 27353624 | 27357543 | - | 3221  | 3084.733 | 0        | -0.29582 | 0.075352 | -3.92584 | 0.00016  | 0.001743 | 1 |
| ENSG0000 | response | Inflamed | C3orf80   | protein_cc chr3  | 1.6E+08  | 1.6E+08  | + | 2577  | 49.94749 | 0.011933 | -0.92682 | 0.236111 | -3.92537 | 0.00016  | 0.001746 | 1 |
| ENSG0000 | response | Inflamed | IL21      | protein_cc chr4  | 1.24E+08 | 1.24E+08 | - | 629   | 4.300716 | 0.4821   | -0.77803 | 0.198217 | -3.92516 | 0.00016  | 0.001746 | 1 |
| ENSG0000 | response | Inflamed | ERVW-1    | protein_cc chr7  | 92097694 | 92107300 | - | 6130  | 1.637232 | 0.75179  | 0.700068 | 0.178392 | 3.924323 | 0.000161 | 0.001751 | 1 |
| ENSG0000 | response | Inflamed | DGKQ      | protein_cc chr4  | 952675   | 980683   | - | 4970  | 3332.334 | 0        | 0.45574  | 0.116177 | 3.922818 | 0.000162 | 0.00176  | 1 |
| ENSG0000 | response | Inflamed | ARMCX2    | protein_cc chrX  | 1.01E+08 | 1.01E+08 | - | 3589  | 451.7327 | 0        | -0.5723  | 0.145956 | -3.92102 | 0.000163 | 0.00177  | 1 |
| ENSG0000 | response | Inflamed | FAM89B    | protein_cc chr11 | 65339820 | 65341669 | + | 1458  | 478.0358 | 0        | -0.41015 | 0.104609 | -3.92075 | 0.000163 | 0.001771 | 1 |
| ENSG0000 | response | Inflamed | RP11-120k | lincRNA chr13    | 1.14E+08 | 1.14E+08 | - | 1297  | 32.32458 | 0.02864  | 0.807534 | 0.205994 | 3.920177 | 0.000163 | 0.001773 | 1 |
| ENSG0000 | response | Inflamed | TMEM121   | protein_cc chr14 | 1.06E+08 | 1.06E+08 | + | 1904  | 41.95943 | 0.002387 | -0.73113 | 0.186505 | -3.92018 | 0.000163 | 0.001773 | 1 |
| ENSG0000 | response | Inflamed | KRT5      | protein_cc chr12 | 52908359 | 52914471 | - | 4292  | 344.0644 | 0.116945 | -1.3022  | 0.33223  | -3.91957 | 0.000163 | 0.001776 | 1 |
| ENSG0000 | response | Inflamed | BOC       | protein_cc chr3  | 1.13E+08 | 1.13E+08 | + | 10327 | 723.5394 | 0        | -0.72833 | 0.185828 | -3.91936 | 0.000164 | 0.001777 | 1 |
| ENSG0000 | response | Inflamed | AMZ1      | protein_cc chr7  | 2719156  | 2815134  | + | 7011  | 17.90215 | 0.081146 | -1.0114  | 0.258059 | -3.91926 | 0.000164 | 0.001777 | 1 |
| ENSG0000 | response | Inflamed | ATF4P3    | pseudoger chr17  | 74221832 | 74222887 | - | 1056  | 21.53461 | 0        | -0.43835 | 0.111872 | -3.91829 | 0.000164 | 0.001782 | 1 |
| ENSG0000 | response | Inflamed | TMEM236   | protein_cc chr10 | 18041218 | 18089855 | + | 5465  | 261.3126 | 0.009547 | 1.301366 | 0.332195 | 3.917469 | 0.000165 | 0.001787 | 1 |
| ENSG0000 | response | Inflamed | TMEM108   | protein_cc chr3  | 1.33E+08 | 1.33E+08 | + | 8425  | 69.71122 | 0.009547 | -0.8748  | 0.223332 | -3.91703 | 0.000165 | 0.001789 | 1 |
| ENSG0000 | response | Inflamed | RP11-542E | lincRNA chr12    | 67913609 | 67960906 | + | 2284  | 7.575179 | 0.28401  | 0.773601 | 0.197507 | 3.91684  | 0.000165 | 0.00179  | 1 |
| ENSG0000 | response | Inflamed | LIX1L     | protein_cc chr1  | 1.45E+08 | 1.46E+08 | + | 3979  | 926.5967 | 0        | -0.53097 | 0.135568 | -3.91665 | 0.000165 | 0.00179  | 1 |
| ENSG0000 | response | Inflamed | TMC4      | protein_cc chr19 | 54663846 | 54676944 | - | 4421  | 6269.754 | 0        | 0.680818 | 0.173864 | 3.915808 | 0.000166 | 0.001795 | 1 |
| ENSG0000 | response | Inflamed | RP11-566k | antisense chr16  | 89986235 | 89989070 | - | 985   | 2.393795 | 0.441527 | -0.55669 | 0.142178 | -3.91546 | 0.000166 | 0.001796 | 1 |
| ENSG0000 | response | Inflamed | PDE6B     | protein_cc chr4  | 619373   | 664571   | + | 5086  | 57.83532 | 0        | -0.59327 | 0.151554 | -3.91455 | 0.000166 | 0.001801 | 1 |
| ENSG0000 | response | Inflamed | LBX2-AS1  | antisense chr2   | 74729722 | 74731805 | + | 2084  | 443.9284 | 0        | 0.33102  | 0.084563 | 3.914474 | 0.000166 | 0.001801 | 1 |
| ENSG0000 | response | Inflamed | CTB-161K2 | antisense chr7   | 91763918 | 91810039 | + | 2957  | 2.594272 | 0.346062 | -0.43638 | 0.111485 | -3.91427 | 0.000167 | 0.001802 | 1 |
| ENSG0000 | response | Inflamed | PPFIA3    | protein_cc chr19 | 49622646 | 49654283 | + | 6451  | 630.1169 | 0        | 0.43704  | 0.111679 | 3.913344 | 0.000167 | 0.001807 | 1 |
| ENSG0000 | response | Inflamed | SHC1      | protein_cc chr1  | 1.55E+08 | 1.55E+08 | - | 4342  | 6822.017 | 0        | -0.31242 | 0.07985  | -3.91257 | 0.000168 | 0.001811 | 1 |

|                   |          |           |                  |          |          |   |       |          |          |          |          |          |          |          |   |
|-------------------|----------|-----------|------------------|----------|----------|---|-------|----------|----------|----------|----------|----------|----------|----------|---|
| ENSG0000 response | Inflamed | PHF19     | protein_cc chr9  | 1.24E+08 | 1.24E+08 | - | 6547  | 1321.506 | 0        | -0.38318 | 0.097941 | -3.9124  | 0.000168 | 0.001812 | 1 |
| ENSG0000 response | Inflamed | DRAM1     | protein_cc chr12 | 1.02E+08 | 1.02E+08 | + | 4061  | 1084.709 | 0        | -0.70516 | 0.180285 | -3.91138 | 0.000168 | 0.001817 | 1 |
| ENSG0000 response | Inflamed | RP11-881M | antisense chr11  | 60674261 | 60677214 | + | 810   | 9.069212 | 0.047733 | -0.65751 | 0.168112 | -3.91112 | 0.000168 | 0.001818 | 1 |
| ENSG0000 response | Inflamed | AC106869  | lincRNA chr2     | 47452933 | 47466364 | + | 677   | 11.74224 | 0.181384 | 0.834196 | 0.213341 | 3.91016  | 0.000169 | 0.001824 | 1 |
| ENSG0000 response | Inflamed | SLC9A2    | protein_cc chr2  | 1.03E+08 | 1.03E+08 | + | 5984  | 2460.513 | 0.004773 | 1.176397 | 0.300882 | 3.909831 | 0.000169 | 0.001825 | 1 |
| ENSG0000 response | Inflamed | ARHGAP25  | protein_cc chr17 | 36584662 | 36668628 | + | 8014  | 1278.532 | 0        | -0.87868 | 0.224753 | -3.90955 | 0.000169 | 0.001826 | 1 |
| ENSG0000 response | Inflamed | NOVA2     | protein_cc chr19 | 46436992 | 46476804 | - | 8684  | 197.58   | 0.01432  | -0.84282 | 0.215583 | -3.90951 | 0.000169 | 0.001826 | 1 |
| ENSG0000 response | Inflamed | XYLB      | protein_cc chr3  | 38388251 | 38462839 | + | 5343  | 369.7542 | 0        | 0.409335 | 0.104713 | 3.909094 | 0.00017  | 0.001828 | 1 |
| ENSG0000 response | Inflamed | LPXN      | protein_cc chr11 | 58294344 | 58345693 | - | 2467  | 909.179  | 0        | -0.48997 | 0.12535  | -3.90883 | 0.00017  | 0.001829 | 1 |
| ENSG0000 response | Inflamed | HECW2     | protein_cc chr2  | 1.97E+08 | 1.97E+08 | - | 12692 | 186.5274 | 0.011933 | -0.92745 | 0.237296 | -3.90842 | 0.00017  | 0.001831 | 1 |
| ENSG0000 response | Inflamed | LRR31     | protein_cc chr3  | 1.7E+08  | 1.7E+08  | - | 3113  | 656.4439 | 0.009547 | 1.040746 | 0.266299 | 3.908191 | 0.00017  | 0.001832 | 1 |
| ENSG0000 response | Inflamed | GJB6      | protein_cc chr13 | 20796110 | 20806534 | - | 2244  | 3.575179 | 0.431981 | -0.75172 | 0.192362 | -3.90786 | 0.00017  | 0.001832 | 1 |
| ENSG0000 response | Inflamed | RP11-568M | lincRNA chr2     | 64749321 | 64751227 | - | 1907  | 59.10024 | 0.009547 | -0.6048  | 0.154765 | -3.90782 | 0.00017  | 0.001832 | 1 |
| ENSG0000 response | Inflamed | LG12      | protein_cc chr4  | 25000469 | 25032501 | - | 6428  | 243.4081 | 0.004773 | -1.07296 | 0.27458  | -3.90764 | 0.000171 | 0.001833 | 1 |
| ENSG0000 response | Inflamed | GPD1L     | protein_cc chr3  | 32147181 | 32210205 | + | 4802  | 2890.601 | 0        | 0.731169 | 0.187146 | 3.906944 | 0.000171 | 0.001837 | 1 |
| ENSG0000 response | Inflamed | ABCB1     | protein_cc chr7  | 87133175 | 87342611 | - | 5552  | 1687.248 | 0        | 1.093085 | 0.279808 | 3.906553 | 0.000171 | 0.001839 | 1 |
| ENSG0000 response | Inflamed | SCNN1B    | protein_cc chr16 | 23289552 | 23392620 | + | 3918  | 3194.384 | 0        | 1.194447 | 0.305836 | 3.905513 | 0.000172 | 0.001843 | 1 |
| ENSG0000 response | Inflamed | PCAT6     | antisense chr1   | 2.03E+08 | 2.03E+08 | + | 890   | 42.50597 | 0.002387 | -0.39821 | 0.101964 | -3.90543 | 0.000172 | 0.001843 | 1 |
| ENSG0000 response | Inflamed | TLDC2     | protein_cc chr20 | 35504524 | 35522638 | + | 2553  | 678.2554 | 0        | 0.734127 | 0.187976 | 3.905428 | 0.000172 | 0.001843 | 1 |
| ENSG0000 response | Inflamed | FAM219A   | protein_cc chr9  | 34398182 | 34458568 | - | 3782  | 850.1862 | 0        | -0.45682 | 0.116972 | -3.9054  | 0.000172 | 0.001843 | 1 |
| ENSG0000 response | Inflamed | CLEC1A    | protein_cc chr12 | 10222153 | 10264226 | - | 3169  | 93.96181 | 0.004773 | -0.75926 | 0.194491 | -3.90384 | 0.000173 | 0.001852 | 1 |
| ENSG0000 response | Inflamed | LRR31     | protein_cc chr17 | 45908993 | 45915079 | + | 2820  | 22.10263 | 0.00716  | -0.42323 | 0.108415 | -3.90378 | 0.000173 | 0.001852 | 1 |
| ENSG0000 response | Inflamed | ELL2P1    | pseudoger chr1   | 1.58E+08 | 1.58E+08 | - | 1906  | 10.9284  | 0.066826 | -0.63201 | 0.161901 | -3.90367 | 0.000173 | 0.001852 | 1 |
| ENSG0000 response | Inflamed | RP11-20G  | lincRNA chr15    | 99967214 | 99971233 | - | 395   | 6.186158 | 0.188544 | 0.633035 | 0.162167 | 3.903589 | 0.000173 | 0.001852 | 1 |
| ENSG0000 response | Inflamed | AC093616  | pseudoger chr2   | 88000503 | 88038766 | + | 2328  | 21.93795 | 0.019093 | -0.74308 | 0.190371 | -3.90331 | 0.000173 | 0.001853 | 1 |
| ENSG0000 response | Inflamed | GALNT15   | protein_cc chr3  | 16216156 | 16273499 | + | 5676  | 216.7589 | 0.00716  | -1.28103 | 0.328195 | -3.90324 | 0.000173 | 0.001853 | 1 |
| ENSG0000 response | Inflamed | RP11-680F | antisense chr15  | 29967194 | 29973161 | + | 2736  | 108.3699 | 0        | 0.772269 | 0.197861 | 3.903096 | 0.000173 | 0.001853 | 1 |
| ENSG0000 response | Inflamed | CYCS      | protein_cc chr7  | 25159710 | 25164980 | - | 4457  | 6574.258 | 0        | 0.544492 | 0.139507 | 3.902983 | 0.000173 | 0.001853 | 1 |
| ENSG0000 response | Inflamed | CNTNAP2   | protein_cc chr7  | 1.46E+08 | 1.48E+08 | + | 10308 | 202.5704 | 0        | 0.790719 | 0.202614 | 3.902585 | 0.000174 | 0.001855 | 1 |
| ENSG0000 response | Inflamed | EGFR-AS1  | antisense chr7   | 55247443 | 55256627 | - | 2806  | 5.589499 | 0.50358  | 0.591861 | 0.151665 | 3.902418 | 0.000174 | 0.001855 | 1 |
| ENSG0000 response | Inflamed | PPP1R1B   | protein_cc chr17 | 37782993 | 37792879 | + | 4554  | 10267.13 | 0        | 0.872074 | 0.223513 | 3.901666 | 0.000174 | 0.00186  | 1 |
| ENSG0000 response | Inflamed | AC002480  | antisense chr7   | 22629324 | 22631241 | + | 557   | 1.031026 | 0.718377 | -0.41877 | 0.107353 | -3.90084 | 0.000175 | 0.001864 | 1 |
| ENSG0000 response | Inflamed | XPNPEP2   | protein_cc chrX  | 1.29E+08 | 1.29E+08 | + | 3500  | 1087.396 | 0        | 1.276839 | 0.327382 | 3.900148 | 0.000175 | 0.001868 | 1 |
| ENSG0000 response | Inflamed | TRAV24    | TR_V_gene chr14  | 22573620 | 22574123 | + | 343   | 4.150358 | 0.28401  | -0.59735 | 0.153166 | -3.90001 | 0.000175 | 0.001868 | 1 |
| ENSG0000 response | Inflamed | AD000684  | sense_intr chr19 | 35753749 | 35755707 | + | 1016  | 30.82578 | 0.040573 | 0.73879  | 0.189463 | 3.899396 | 0.000176 | 0.001872 | 1 |
| ENSG0000 response | Inflamed | CNRIP1    | protein_cc chr2  | 68511303 | 68547183 | - | 3548  | 375.401  | 0        | -0.55173 | 0.141512 | -3.89883 | 0.000176 | 0.001875 | 1 |
| ENSG0000 response | Inflamed | IGHV4-55  | IG_V_pseu chr14  | 1.07E+08 | 1.07E+08 | - | 368   | 85.10263 | 0.01432  | -1.05021 | 0.269373 | -3.89873 | 0.000176 | 0.001875 | 1 |
| ENSG0000 response | Inflamed | RP11-229F | lincRNA chr9     | 1.4E+08  | 1.4E+08  | + | 697   | 14.99284 | 0.097852 | -0.87495 | 0.224438 | -3.8984  | 0.000176 | 0.001876 | 1 |
| ENSG0000 response | Inflamed | CNTNAP1   | protein_cc chr17 | 40834631 | 40851832 | + | 6045  | 616.79   | 0.004773 | -0.80597 | 0.206845 | -3.8965  | 0.000178 | 0.001888 | 1 |
| ENSG0000 response | Inflamed | PLEKHD1   | protein_cc chr14 | 69951409 | 69995215 | + | 5044  | 3.140811 | 0.369928 | -0.60842 | 0.156162 | -3.89606 | 0.000178 | 0.00189  | 1 |

|                   |          |           |                  |          |          |   |      |          |          |          |          |          |          |          |   |
|-------------------|----------|-----------|------------------|----------|----------|---|------|----------|----------|----------|----------|----------|----------|----------|---|
| ENSG0000 response | Inflamed | BAG2      | protein_cc chr6  | 57037124 | 57054631 | + | 6870 | 193.1838 | 0        | -0.67648 | 0.173638 | -3.89593 | 0.000178 | 0.00189  | 1 |
| ENSG0000 response | Inflamed | ILDR1     | protein_cc chr3  | 1.22E+08 | 1.22E+08 | - | 2953 | 758.9021 | 0        | 0.695753 | 0.1786   | 3.895603 | 0.000178 | 0.001891 | 1 |
| ENSG0000 response | Inflamed | RHOV      | protein_cc chr15 | 41164412 | 41166487 | - | 1705 | 155.7351 | 0.002387 | 0.717123 | 0.184085 | 3.895602 | 0.000178 | 0.001891 | 1 |
| ENSG0000 response | Inflamed | CCNA1     | protein_cc chr13 | 37005967 | 37017019 | + | 2302 | 3.288783 | 0.431981 | -0.65069 | 0.167072 | -3.89468 | 0.000179 | 0.001897 | 1 |
| ENSG0000 response | Inflamed | HEXIM2    | protein_cc chr17 | 43238067 | 43247407 | + | 2038 | 158.6969 | 0        | -0.38916 | 0.099925 | -3.89449 | 0.000179 | 0.001897 | 1 |
| ENSG0000 response | Inflamed | CTD-2587f | lincRNA chr19    | 54862991 | 54864894 | - | 1904 | 59.75418 | 0.004773 | -0.66795 | 0.171514 | -3.89441 | 0.000179 | 0.001897 | 1 |
| ENSG0000 response | Inflamed | PCDH12    | protein_cc chr5  | 1.41E+08 | 1.41E+08 | - | 6818 | 463.6874 | 0        | -0.70591 | 0.181269 | -3.89426 | 0.000179 | 0.001897 | 1 |
| ENSG0000 response | Inflamed | CDCP2     | protein_cc chr1  | 54598747 | 54619443 | - | 3123 | 2.942721 | 0.367542 | -0.60612 | 0.155668 | -3.89365 | 0.000179 | 0.001901 | 1 |
| ENSG0000 response | Inflamed | IQCA1     | protein_cc chr2  | 2.37E+08 | 2.37E+08 | - | 5970 | 21.30788 | 0.042959 | -0.80083 | 0.20569  | -3.89337 | 0.00018  | 0.001902 | 1 |
| ENSG0000 response | Inflamed | IGFLR1    | protein_cc chr19 | 36230058 | 36233354 | - | 1847 | 66.21957 | 0.002387 | -0.59353 | 0.152505 | -3.89186 | 0.000181 | 0.001911 | 1 |
| ENSG0000 response | Inflamed | VSTM1     | protein_cc chr19 | 54544079 | 54567207 | - | 1238 | 27.05728 | 0.052506 | -0.99648 | 0.256085 | -3.8912  | 0.000181 | 0.001915 | 1 |
| ENSG0000 response | Inflamed | EXOC3L2   | protein_cc chr19 | 45715879 | 45737469 | - | 1725 | 269.5084 | 0.002387 | -0.77641 | 0.199535 | -3.89112 | 0.000181 | 0.001915 | 1 |
| ENSG0000 response | Inflamed | HSBP1L1   | protein_cc chr18 | 77724561 | 77730822 | + | 2056 | 898.315  | 0        | 0.500834 | 0.128722 | 3.89083  | 0.000181 | 0.001916 | 1 |
| ENSG0000 response | Inflamed | TUBA1A    | protein_cc chr12 | 49578579 | 49583107 | - | 3421 | 2422.561 | 0        | -0.63566 | 0.163389 | -3.89046 | 0.000181 | 0.001918 | 1 |
| ENSG0000 response | Inflamed | RP11-649C | antisense chr8   | 1.08E+08 | 1.08E+08 | - | 504  | 6.408115 | 0.202864 | 0.669392 | 0.172082 | 3.889949 | 0.000182 | 0.00192  | 1 |
| ENSG0000 response | Inflamed | FAM129A   | protein_cc chr1  | 1.85E+08 | 1.85E+08 | - | 8372 | 1679.088 | 0        | -0.87922 | 0.226046 | -3.88955 | 0.000182 | 0.001921 | 1 |
| ENSG0000 response | Inflamed | ANKRD55   | protein_cc chr5  | 55395507 | 55529186 | - | 2977 | 16.73508 | 0.042959 | -0.83383 | 0.214385 | -3.88942 | 0.000182 | 0.001921 | 1 |
| ENSG0000 response | Inflamed | SLC25A21  | protein_cc chr14 | 37641093 | 37643016 | + | 1924 | 28.06205 | 0.009547 | 0.567319 | 0.145866 | 3.889311 | 0.000182 | 0.001921 | 1 |
| ENSG0000 response | Inflamed | SGK2      | protein_cc chr20 | 42187608 | 42216877 | + | 3465 | 2140.788 | 0        | 1.009945 | 0.259673 | 3.889298 | 0.000182 | 0.001921 | 1 |
| ENSG0000 response | Inflamed | RP11-21C4 | antisense chr8   | 65486863 | 65494445 | - | 2875 | 13.85919 | 0.128878 | -0.93181 | 0.239584 | -3.88929 | 0.000182 | 0.001921 | 1 |
| ENSG0000 response | Inflamed | RP11-65J2 | lincRNA chr16    | 14396145 | 14420210 | + | 741  | 7.214797 | 0.102625 | -0.62655 | 0.161103 | -3.88913 | 0.000182 | 0.001921 | 1 |
| ENSG0000 response | Inflamed | SULT2A1   | protein_cc chr19 | 48373723 | 48389654 | - | 1987 | 22.43437 | 0.809069 | 0.941391 | 0.242078 | 3.88879  | 0.000182 | 0.001923 | 1 |
| ENSG0000 response | Inflamed | RP11-108L | lincRNA chr10    | 1.03E+08 | 1.03E+08 | - | 977  | 43.09785 | 0        | 0.637809 | 0.164016 | 3.88869  | 0.000183 | 0.001923 | 1 |
| ENSG0000 response | Inflamed | ODF3B     | protein_cc chr22 | 50968139 | 50971009 | - | 2301 | 721.4391 | 0        | -0.68143 | 0.17525  | -3.88832 | 0.000183 | 0.001923 | 1 |
| ENSG0000 response | Inflamed | ADCY6     | protein_cc chr12 | 49159975 | 49182820 | - | 8412 | 7082.296 | 0        | 0.568323 | 0.146167 | 3.888183 | 0.000183 | 0.001923 | 1 |
| ENSG0000 response | Inflamed | IGKV3D-7  | IG_V_gene chr2   | 90273679 | 90274235 | + | 382  | 18.58473 | 0.069212 | -0.99272 | 0.255318 | -3.88817 | 0.000183 | 0.001923 | 1 |
| ENSG0000 response | Inflamed | NKX3-1    | protein_cc chr8  | 23536206 | 23540440 | - | 3271 | 71.29594 | 0.009547 | -0.73448 | 0.188906 | -3.88806 | 0.000183 | 0.001923 | 1 |
| ENSG0000 response | Inflamed | CDK18     | protein_cc chr1  | 2.05E+08 | 2.06E+08 | + | 7580 | 1351.103 | 0        | 0.464499 | 0.119469 | 3.888041 | 0.000183 | 0.001923 | 1 |
| ENSG0000 response | Inflamed | RUSC1     | protein_cc chr1  | 1.55E+08 | 1.55E+08 | + | 5427 | 2860.601 | 0        | 0.286484 | 0.073685 | 3.887966 | 0.000183 | 0.001923 | 1 |
| ENSG0000 response | Inflamed | FGD5      | protein_cc chr3  | 14860469 | 14975895 | + | 7869 | 1235.461 | 0        | -0.74272 | 0.191056 | -3.88746 | 0.000183 | 0.001926 | 1 |
| ENSG0000 response | Inflamed | SERPINA6  | protein_cc chr14 | 94770585 | 94789731 | - | 1852 | 65.39857 | 0.023866 | 1.024343 | 0.263593 | 3.88608  | 0.000184 | 0.001935 | 1 |
| ENSG0000 response | Inflamed | IGHV1-58  | IG_V_gene chr14  | 1.07E+08 | 1.07E+08 | - | 412  | 636.3198 | 0.004773 | -1.4065  | 0.362057 | -3.88475 | 0.000185 | 0.001943 | 1 |
| ENSG0000 response | Inflamed | GAL       | protein_cc chr11 | 68451247 | 68458643 | + | 1300 | 51.22673 | 0.038186 | -1.0959  | 0.282119 | -3.88452 | 0.000185 | 0.001944 | 1 |
| ENSG0000 response | Inflamed | RP3-325F2 | antisense chr6   | 1.37E+08 | 1.37E+08 | + | 1894 | 73.60143 | 0.002387 | 0.660639 | 0.170091 | 3.88403  | 0.000186 | 0.001947 | 1 |
| ENSG0000 response | Inflamed | LAIR2     | protein_cc chr19 | 55009100 | 55021897 | + | 1078 | 19.56563 | 0.083532 | -0.9633  | 0.24803  | -3.88381 | 0.000186 | 0.001947 | 1 |
| ENSG0000 response | Inflamed | TGFB3     | protein_cc chr14 | 76424442 | 76449334 | - | 4914 | 514.864  | 0        | -0.90837 | 0.233925 | -3.88318 | 0.000186 | 0.001951 | 1 |
| ENSG0000 response | Inflamed | AJUBA     | protein_cc chr14 | 23440383 | 23451851 | - | 5979 | 249.6897 | 0        | -0.64831 | 0.166967 | -3.88289 | 0.000186 | 0.001952 | 1 |
| ENSG0000 response | Inflamed | CRTAC1    | protein_cc chr10 | 99624757 | 99790585 | - | 3531 | 68.57757 | 0.023866 | -1.20442 | 0.310284 | -3.88167 | 0.000187 | 0.00196  | 1 |
| ENSG0000 response | Inflamed | FILIP1L   | protein_cc chr3  | 99548985 | 99833357 | - | 5897 | 1159.112 | 0        | -0.76059 | 0.195957 | -3.88142 | 0.000187 | 0.001961 | 1 |
| ENSG0000 response | Inflamed | IGLV6-57  | IG_V_gene chr22  | 22550113 | 22550860 | + | 623  | 4690.31  | 0        | -1.31822 | 0.339636 | -3.88128 | 0.000187 | 0.001961 | 1 |



|                   |          |           |                  |          |          |   |       |          |          |          |          |          |          |          |   |
|-------------------|----------|-----------|------------------|----------|----------|---|-------|----------|----------|----------|----------|----------|----------|----------|---|
| ENSG0000 response | Inflamed | SYVN1     | protein_cc chr11 | 64889252 | 64902004 | - | 5496  | 6039.236 | 0        | -0.45431 | 0.117056 | -3.8811  | 0.000188 | 0.001962 | 1 |
| ENSG0000 response | Inflamed | NXPE4     | protein_cc chr11 | 1.14E+08 | 1.14E+08 | - | 2163  | 2900.757 | 0        | 1.45091  | 0.373935 | 3.880116 | 0.000188 | 0.001968 | 1 |
| ENSG0000 response | Inflamed | BHMT2     | protein_cc chr5  | 78365540 | 78385289 | + | 3182  | 60.83055 | 0.02148  | -0.79297 | 0.204382 | -3.87985 | 0.000188 | 0.001968 | 1 |
| ENSG0000 response | Inflamed | AC016831  | lincRNA chr7     | 1.31E+08 | 1.31E+08 | + | 1616  | 50.53938 | 0        | 0.770659 | 0.198636 | 3.879756 | 0.000188 | 0.001968 | 1 |
| ENSG0000 response | Inflamed | IGHV4-39  | IG_V_gene chr14  | 1.07E+08 | 1.07E+08 | - | 425   | 16459.82 | 0        | -1.2365  | 0.318708 | -3.87973 | 0.000188 | 0.001968 | 1 |
| ENSG0000 response | Inflamed | FAHD1     | protein_cc chr16 | 1876968  | 1890208  | + | 3006  | 938.148  | 0        | 0.362123 | 0.09335  | 3.879187 | 0.000189 | 0.00197  | 1 |
| ENSG0000 response | Inflamed | MAGED2    | protein_cc chrX  | 54834032 | 54842445 | + | 2914  | 3286.458 | 0        | -0.32816 | 0.084595 | -3.87918 | 0.000189 | 0.00197  | 1 |
| ENSG0000 response | Inflamed | C2        | protein_cc chr6  | 31865562 | 31913449 | + | 5536  | 1619.229 | 0        | -0.54957 | 0.141701 | -3.87838 | 0.000189 | 0.001975 | 1 |
| ENSG0000 response | Inflamed | SFMBT2    | protein_cc chr10 | 7200586  | 7453450  | - | 9955  | 945.611  | 0        | -0.69378 | 0.178934 | -3.87728 | 0.00019  | 0.001982 | 1 |
| ENSG0000 response | Inflamed | C7orf61   | protein_cc chr7  | 1E+08    | 1E+08    | - | 1191  | 7.582339 | 0.073986 | -0.57139 | 0.147386 | -3.87684 | 0.00019  | 0.001984 | 1 |
| ENSG0000 response | Inflamed | CHST5     | protein_cc chr16 | 75562433 | 75569145 | - | 3322  | 605.3103 | 0        | 0.971748 | 0.250686 | 3.876363 | 0.000191 | 0.001987 | 1 |
| ENSG0000 response | Inflamed | TBC1D9    | protein_cc chr4  | 1.42E+08 | 1.42E+08 | - | 5603  | 1408.021 | 0        | -0.66978 | 0.172799 | -3.87608 | 0.000191 | 0.001988 | 1 |
| ENSG0000 response | Inflamed | FNDC1     | protein_cc chr6  | 1.6E+08  | 1.6E+08  | + | 6854  | 676.2792 | 0.004773 | -1.14902 | 0.29654  | -3.87475 | 0.000192 | 0.001997 | 1 |
| ENSG0000 response | Inflamed | RP11-366L | protein_cc chr12 | 66245120 | 66275947 | - | 6033  | 1.899761 | 0.706444 | -0.707   | 0.182538 | -3.87315 | 0.000193 | 0.002008 | 1 |
| ENSG0000 response | Inflamed | MEIS3     | protein_cc chr19 | 47906381 | 47922780 | - | 5122  | 287.1002 | 0        | -0.60576 | 0.156439 | -3.87219 | 0.000194 | 0.002013 | 1 |
| ENSG0000 response | Inflamed | RP11-807f | pseudoger chr11  | 71869866 | 71870905 | + | 741   | 20.75418 | 0.396181 | 0.906672 | 0.234151 | 3.872169 | 0.000194 | 0.002013 | 1 |
| ENSG0000 response | Inflamed | RP11-492E | antisense chr9   | 1.32E+08 | 1.32E+08 | + | 2449  | 18.94749 | 0.01432  | -0.72627 | 0.187597 | -3.87146 | 0.000194 | 0.002017 | 1 |
| ENSG0000 response | Inflamed | IRF6      | protein_cc chr1  | 2.1E+08  | 2.1E+08  | - | 4792  | 4016.432 | 0        | 0.805176 | 0.208001 | 3.871014 | 0.000194 | 0.00202  | 1 |
| ENSG0000 response | Inflamed | RP3-428L1 | antisense chr6   | 1.61E+08 | 1.61E+08 | - | 2025  | 39.55609 | 0.004773 | -0.963   | 0.248845 | -3.8699  | 0.000195 | 0.002027 | 1 |
| ENSG0000 response | Inflamed | RP13-726E | processed_chr11  | 3502750  | 3602441  | - | 1377  | 16.30549 | 0.040573 | 0.753538 | 0.194792 | 3.868415 | 0.000196 | 0.002037 | 1 |
| ENSG0000 response | Inflamed | STC1      | protein_cc chr8  | 23699428 | 23712320 | - | 4149  | 723.8377 | 0.004773 | -1.61559 | 0.417653 | -3.86825 | 0.000196 | 0.002037 | 1 |
| ENSG0000 response | Inflamed | LINC00941 | lincRNA chr12    | 30947977 | 30955645 | + | 2856  | 13.74463 | 0.231504 | -1.08545 | 0.280625 | -3.86796 | 0.000197 | 0.002039 | 1 |
| ENSG0000 response | Inflamed | FXYD3     | protein_cc chr19 | 35606732 | 35615228 | + | 3385  | 17661.71 | 0        | 1.004151 | 0.259667 | 3.867072 | 0.000197 | 0.002043 | 1 |
| ENSG0000 response | Inflamed | PAK4      | protein_cc chr19 | 39616410 | 39673456 | + | 7118  | 3405.263 | 0        | 0.462209 | 0.119527 | 3.866993 | 0.000197 | 0.002043 | 1 |
| ENSG0000 response | Inflamed | IGHV3-43  | IG_V_gene chr14  | 1.07E+08 | 1.07E+08 | - | 434   | 2176.747 | 0        | -1.36147 | 0.35208  | -3.86694 | 0.000197 | 0.002043 | 1 |
| ENSG0000 response | Inflamed | IFITM1    | protein_cc chr11 | 313506   | 315272   | + | 1080  | 3878.456 | 0        | -0.61858 | 0.15997  | -3.86689 | 0.000197 | 0.002043 | 1 |
| ENSG0000 response | Inflamed | CACNA1E   | protein_cc chr1  | 1.81E+08 | 1.82E+08 | + | 17878 | 53.59427 | 0.033413 | -1.08101 | 0.279593 | -3.86638 | 0.000198 | 0.002046 | 1 |
| ENSG0000 response | Inflamed | TACC3     | protein_cc chr4  | 1723227  | 1746898  | + | 4682  | 1551.871 | 0        | -0.44022 | 0.11387  | -3.86597 | 0.000198 | 0.002048 | 1 |
| ENSG0000 response | Inflamed | PACS1     | protein_cc chr11 | 65837834 | 66012218 | + | 9037  | 2879.358 | 0        | -0.63536 | 0.164359 | -3.86566 | 0.000198 | 0.00205  | 1 |
| ENSG0000 response | Inflamed | RP11-426C | lincRNA chr16    | 29228491 | 29231352 | - | 2099  | 12.58711 | 0.279236 | -1.14651 | 0.296656 | -3.86478 | 0.000199 | 0.002055 | 1 |
| ENSG0000 response | Inflamed | MAP7D1    | protein_cc chr1  | 36621180 | 36646450 | + | 5271  | 3890.9   | 0        | -0.44647 | 0.115526 | -3.86466 | 0.000199 | 0.002055 | 1 |
| ENSG0000 response | Inflamed | TEX41     | lincRNA chr2     | 1.45E+08 | 1.46E+08 | + | 10623 | 3.813842 | 0.410501 | -0.723   | 0.187084 | -3.86458 | 0.000199 | 0.002055 | 1 |
| ENSG0000 response | Inflamed | RP5-1139E | antisense chr1   | 2.28E+08 | 2.28E+08 | - | 1483  | 14.03819 | 0.045346 | -0.71253 | 0.184394 | -3.86418 | 0.000199 | 0.002057 | 1 |
| ENSG0000 response | Inflamed | RP11-35P1 | lincRNA chr11    | 1.18E+08 | 1.18E+08 | + | 376   | 21.21241 | 0.047733 | 0.89085  | 0.230544 | 3.86412  | 0.000199 | 0.002057 | 1 |
| ENSG0000 response | Inflamed | GIMAP1    | protein_cc chr7  | 1.5E+08  | 1.5E+08  | + | 4846  | 548.389  | 0        | -0.50808 | 0.131506 | -3.86355 | 0.0002   | 0.00206  | 1 |
| ENSG0000 response | Inflamed | ARHGEF15  | protein_cc chr17 | 8213559  | 8225829  | + | 5291  | 503.9785 | 0        | -0.7812  | 0.202211 | -3.86328 | 0.0002   | 0.002061 | 1 |
| ENSG0000 response | Inflamed | RP11-209E | lincRNA chr15    | 53408562 | 53421895 | + | 601   | 15.31981 | 0.360382 | 1.024325 | 0.265226 | 3.862089 | 0.000201 | 0.002069 | 1 |
| ENSG0000 response | Inflamed | AC011899  | antisense chr7   | 1.58E+08 | 1.58E+08 | + | 4662  | 152.2172 | 0.002387 | -0.51244 | 0.132687 | -3.862   | 0.000201 | 0.002069 | 1 |
| ENSG0000 response | Inflamed | SGSM1     | protein_cc chr22 | 25202236 | 25323545 | + | 8507  | 176.7041 | 0.002387 | 0.70421  | 0.182395 | 3.860906 | 0.000202 | 0.002076 | 1 |
| ENSG0000 response | Inflamed | CYC1      | protein_cc chr8  | 1.45E+08 | 1.45E+08 | + | 1975  | 5648.033 | 0        | 0.346488 | 0.089769 | 3.859759 | 0.000202 | 0.002084 | 1 |

|                   |          |           |                  |          |          |   |       |          |          |          |          |          |          |          |   |
|-------------------|----------|-----------|------------------|----------|----------|---|-------|----------|----------|----------|----------|----------|----------|----------|---|
| ENSG0000 response | Inflamed | SERINC5   | protein_cc chr5  | 79407050 | 79551898 | - | 5107  | 1225.523 | 0        | 0.57564  | 0.149151 | 3.859433 | 0.000203 | 0.002085 | 1 |
| ENSG0000 response | Inflamed | ANGPTL6   | protein_cc chr19 | 10203014 | 10213472 | - | 2181  | 62.85919 | 0        | -0.62794 | 0.162705 | -3.85936 | 0.000203 | 0.002085 | 1 |
| ENSG0000 response | Inflamed | ETV3L     | protein_cc chr1  | 1.57E+08 | 1.57E+08 | - | 1976  | 3.883055 | 0.560859 | -0.85738 | 0.222186 | -3.85884 | 0.000203 | 0.002088 | 1 |
| ENSG0000 response | Inflamed | RDH8      | protein_cc chr19 | 10123925 | 10132955 | + | 2001  | 3.553699 | 0.568019 | -0.88618 | 0.229654 | -3.85876 | 0.000203 | 0.002088 | 1 |
| ENSG0000 response | Inflamed | DGCR5     | antisense chr22  | 18958027 | 19018755 | + | 8670  | 4.064439 | 0.379475 | -0.69471 | 0.180081 | -3.85776 | 0.000204 | 0.002095 | 1 |
| ENSG0000 response | Inflamed | LINC0105C | lincRNA chr13    | 43384502 | 43386698 | - | 760   | 3.155131 | 0.622912 | -0.92297 | 0.23928  | -3.85727 | 0.000204 | 0.002098 | 1 |
| ENSG0000 response | Inflamed | IGLV2-8   | IG_V_gene chr22  | 23165153 | 23165787 | + | 520   | 22428.69 | 0        | -1.12894 | 0.292698 | -3.85701 | 0.000204 | 0.002098 | 1 |
| ENSG0000 response | Inflamed | CBX6      | protein_cc chr22 | 39257455 | 39268319 | - | 8030  | 3030.683 | 0        | -0.58189 | 0.150872 | -3.85686 | 0.000204 | 0.002098 | 1 |
| ENSG0000 response | Inflamed | EPN2-AS1  | antisense chr17  | 19199909 | 19209574 | - | 1190  | 1.198091 | 0.72315  | -0.47467 | 0.123073 | -3.85685 | 0.000204 | 0.002098 | 1 |
| ENSG0000 response | Inflamed | MPND      | protein_cc chr19 | 4343524  | 4360083  | + | 2049  | 1664.876 | 0        | 0.380526 | 0.098665 | 3.856739 | 0.000205 | 0.002098 | 1 |
| ENSG0000 response | Inflamed | KB-1247B1 | pseudoger chr8   | 95214141 | 95215280 | - | 833   | 22.36038 | 0.038186 | 0.818597 | 0.212268 | 3.856438 | 0.000205 | 0.0021   | 1 |
| ENSG0000 response | Inflamed | PRDM8     | protein_cc chr4  | 81105033 | 81125483 | + | 4588  | 235.4153 | 0        | -0.78381 | 0.203312 | -3.85521 | 0.000206 | 0.002108 | 1 |
| ENSG0000 response | Inflamed | FGF9      | protein_cc chr13 | 22245522 | 22278637 | + | 4539  | 62.41766 | 0.019093 | 0.989934 | 0.256804 | 3.854825 | 0.000206 | 0.00211  | 1 |
| ENSG0000 response | Inflamed | OR2S1P    | pseudoger chr9   | 36013181 | 36014130 | + | 950   | 15.86396 | 0.100239 | 0.765021 | 0.198464 | 3.854704 | 0.000206 | 0.00211  | 1 |
| ENSG0000 response | Inflamed | HSPA12B   | protein_cc chr20 | 3713314  | 3733758  | + | 3173  | 369.8592 | 0        | -0.77865 | 0.202016 | -3.85437 | 0.000206 | 0.002112 | 1 |
| ENSG0000 response | Inflamed | HMGCL     | protein_cc chr1  | 24128375 | 24165110 | - | 5658  | 1867.959 | 0        | 0.358619 | 0.093081 | 3.852778 | 0.000207 | 0.002123 | 1 |
| ENSG0000 response | Inflamed | RASSF1    | protein_cc chr3  | 50367219 | 50378411 | - | 3677  | 1347.721 | 0        | -0.32807 | 0.08518  | -3.85146 | 0.000208 | 0.002132 | 1 |
| ENSG0000 response | Inflamed | MAFG-AS1  | antisense chr17  | 79885705 | 79888629 | + | 1895  | 58.34368 | 0.002387 | -0.51041 | 0.132541 | -3.85095 | 0.000209 | 0.002135 | 1 |
| ENSG0000 response | Inflamed | MDFIC     | protein_cc chr7  | 1.15E+08 | 1.15E+08 | + | 5252  | 704.21   | 0        | -0.75062 | 0.194936 | -3.85062 | 0.000209 | 0.002137 | 1 |
| ENSG0000 response | Inflamed | IGHV1-2   | IG_V_gene chr14  | 1.06E+08 | 1.06E+08 | - | 415   | 10960.87 | 0        | -1.21912 | 0.316612 | -3.85052 | 0.000209 | 0.002137 | 1 |
| ENSG0000 response | Inflamed | PLA2G2D   | protein_cc chr1  | 20438432 | 20446050 | - | 2672  | 709.8329 | 0.002387 | -1.29745 | 0.33696  | -3.85045 | 0.000209 | 0.002137 | 1 |
| ENSG0000 response | Inflamed | HLA-E     | protein_cc chr6  | 30457244 | 30461982 | + | 2975  | 42464.64 | 0        | -0.2629  | 0.068293 | -3.84957 | 0.00021  | 0.002142 | 1 |
| ENSG0000 response | Inflamed | CYP4F2    | protein_cc chr19 | 15988833 | 16008930 | - | 2998  | 252.3389 | 0.023866 | 1.352482 | 0.351357 | 3.849313 | 0.00021  | 0.002143 | 1 |
| ENSG0000 response | Inflamed | PMEPA1    | protein_cc chr20 | 56223448 | 56286592 | - | 5619  | 3656.029 | 0        | -0.47099 | 0.122372 | -3.84887 | 0.00021  | 0.002146 | 1 |
| ENSG0000 response | Inflamed | GALM      | protein_cc chr2  | 38893052 | 38968379 | + | 2790  | 1985.055 | 0        | 0.415329 | 0.107922 | 3.848407 | 0.000211 | 0.002149 | 1 |
| ENSG0000 response | Inflamed | GBP5      | protein_cc chr1  | 89724633 | 89738544 | - | 8200  | 1300.945 | 0        | -1.16266 | 0.302122 | -3.8483  | 0.000211 | 0.002149 | 1 |
| ENSG0000 response | Inflamed | DKK1      | protein_cc chr10 | 54074056 | 54077802 | + | 2206  | 36.27924 | 0.059666 | -1.31154 | 0.340862 | -3.84771 | 0.000211 | 0.002152 | 1 |
| ENSG0000 response | Inflamed | TFPI      | protein_cc chr2  | 1.88E+08 | 1.88E+08 | - | 11714 | 580.8353 | 0        | -0.7415  | 0.192717 | -3.84759 | 0.000211 | 0.002152 | 1 |
| ENSG0000 response | Inflamed | FAM215A   | protein_cc chr17 | 41994576 | 41995326 | + | 751   | 1.477327 | 0.596659 | -0.43086 | 0.111989 | -3.84732 | 0.000212 | 0.002154 | 1 |
| ENSG0000 response | Inflamed | RFX6      | protein_cc chr6  | 1.17E+08 | 1.17E+08 | + | 4093  | 30.11933 | 0.054893 | 1.012151 | 0.263106 | 3.846925 | 0.000212 | 0.002155 | 1 |
| ENSG0000 response | Inflamed | TPRG1-AS1 | lincRNA chr3     | 1.89E+08 | 1.89E+08 | - | 697   | 1.400955 | 0.661098 | -0.51504 | 0.133882 | -3.84692 | 0.000212 | 0.002155 | 1 |
| ENSG0000 response | Inflamed | PLEKHG3   | protein_cc chr14 | 65170820 | 65213610 | + | 8555  | 3062.153 | 0        | 0.485547 | 0.126229 | 3.846553 | 0.000212 | 0.002157 | 1 |
| ENSG0000 response | Inflamed | MIR194-2  | lincRNA chr11    | 64658827 | 64660921 | - | 1852  | 337.1313 | 0.002387 | 0.880223 | 0.22884  | 3.846461 | 0.000212 | 0.002157 | 1 |
| ENSG0000 response | Inflamed | ETV5      | protein_cc chr3  | 1.86E+08 | 1.86E+08 | - | 5802  | 476.5561 | 0        | -0.54661 | 0.142108 | -3.8464  | 0.000212 | 0.002157 | 1 |
| ENSG0000 response | Inflamed | RNU6-140  | snRNA chr19      | 39287642 | 39287749 | - | 108   | 9.083532 | 0.190931 | 0.75464  | 0.196215 | 3.84598  | 0.000213 | 0.002159 | 1 |
| ENSG0000 response | Inflamed | MFGE8     | protein_cc chr15 | 89441916 | 89456642 | - | 4744  | 3711.134 | 0        | -0.57965 | 0.150745 | -3.84525 | 0.000213 | 0.002164 | 1 |
| ENSG0000 response | Inflamed | AC013268  | lincRNA chr2     | 1.11E+08 | 1.11E+08 | + | 3295  | 124.9499 | 0.004773 | 0.686802 | 0.178615 | 3.845145 | 0.000213 | 0.002164 | 1 |
| ENSG0000 response | Inflamed | TIFA      | protein_cc chr4  | 1.13E+08 | 1.13E+08 | - | 4250  | 450.1456 | 0        | -0.62565 | 0.162722 | -3.84487 | 0.000213 | 0.002165 | 1 |
| ENSG0000 response | Inflamed | AC108142  | antisense chr4   | 1.83E+08 | 1.83E+08 | - | 5551  | 6.221957 | 0.415274 | -0.90959 | 0.236582 | -3.84471 | 0.000213 | 0.002165 | 1 |
| ENSG0000 response | Inflamed | JAKMIP1   | protein_cc chr4  | 6027926  | 6202318  | - | 3673  | 45.48449 | 0.011933 | -0.76397 | 0.198711 | -3.84463 | 0.000214 | 0.002165 | 1 |

|                   |          |           |                  |          |          |   |       |          |          |          |          |          |          |          |   |
|-------------------|----------|-----------|------------------|----------|----------|---|-------|----------|----------|----------|----------|----------|----------|----------|---|
| ENSG0000 response | Inflamed | RAB25     | protein_cc chr1  | 1.56E+08 | 1.56E+08 | + | 1689  | 4214.251 | 0        | 0.750182 | 0.195129 | 3.844539 | 0.000214 | 0.002165 | 1 |
| ENSG0000 response | Inflamed | CGB7      | protein_cc chr19 | 49557531 | 49562117 | - | 3387  | 2.164678 | 0.527446 | -0.50123 | 0.13038  | -3.84441 | 0.000214 | 0.002165 | 1 |
| ENSG0000 response | Inflamed | AP001063  | lincRNA chr21    | 45767650 | 45768178 | - | 529   | 1.238663 | 0.711217 | -0.50336 | 0.130943 | -3.84414 | 0.000214 | 0.002166 | 1 |
| ENSG0000 response | Inflamed | APBA1     | protein_cc chr9  | 72042446 | 72287222 | - | 6534  | 491.3699 | 0.002387 | 0.612922 | 0.15947  | 3.843494 | 0.000214 | 0.00217  | 1 |
| ENSG0000 response | Inflamed | DNAH8     | protein_cc chr6  | 38683117 | 38998301 | + | 15051 | 13.93079 | 0.190931 | -0.92094 | 0.239628 | -3.84321 | 0.000215 | 0.002172 | 1 |
| ENSG0000 response | Inflamed | CHKA      | protein_cc chr11 | 67820326 | 67888911 | - | 3877  | 1539.971 | 0        | 0.496953 | 0.129333 | 3.842429 | 0.000215 | 0.002177 | 1 |
| ENSG0000 response | Inflamed | IGKV2-29  | IG_V_pseu chr2   | 89533655 | 89534393 | - | 372   | 560.7184 | 0.009547 | -1.27754 | 0.332533 | -3.84184 | 0.000216 | 0.002181 | 1 |
| ENSG0000 response | Inflamed | AQP11     | protein_cc chr11 | 77300436 | 77321400 | + | 2396  | 162.642  | 0        | 0.627106 | 0.163265 | 3.841031 | 0.000216 | 0.002186 | 1 |
| ENSG0000 response | Inflamed | AC093495  | antisense chr3   | 14186223 | 14189784 | + | 1069  | 4.291169 | 0.250597 | -0.66016 | 0.171886 | -3.84068 | 0.000217 | 0.002188 | 1 |
| ENSG0000 response | Inflamed | CLDN7     | protein_cc chr17 | 7163222  | 7167302  | - | 2492  | 18598.4  | 0        | 0.751918 | 0.195794 | 3.840343 | 0.000217 | 0.00219  | 1 |
| ENSG0000 response | Inflamed | C4A       | protein_cc chr6  | 31949801 | 31970458 | + | 7199  | 793.9403 | 0.00716  | -1.16468 | 0.303295 | -3.84009 | 0.000217 | 0.00219  | 1 |
| ENSG0000 response | Inflamed | PALMD     | protein_cc chr1  | 1E+08    | 1E+08    | + | 8244  | 182.9475 | 0.002387 | -0.82004 | 0.213556 | -3.83995 | 0.000217 | 0.00219  | 1 |
| ENSG0000 response | Inflamed | ANKRD13   | protein_cc chr11 | 67056018 | 67069956 | + | 6643  | 1405.272 | 0        | -0.44838 | 0.116768 | -3.83989 | 0.000217 | 0.00219  | 1 |
| ENSG0000 response | Inflamed | SIGLEC12  | protein_cc chr19 | 51994611 | 52005043 | - | 2201  | 287.0573 | 0        | -0.68268 | 0.177788 | -3.83984 | 0.000217 | 0.00219  | 1 |
| ENSG0000 response | Inflamed | LDOC1     | protein_cc chrX  | 1.4E+08  | 1.4E+08  | - | 1377  | 157.7518 | 0        | -0.60935 | 0.158692 | -3.8398  | 0.000217 | 0.00219  | 1 |
| ENSG0000 response | Inflamed | GBA2      | protein_cc chr9  | 35736863 | 35749983 | - | 5079  | 6340.193 | 0        | 0.349879 | 0.09113  | 3.839324 | 0.000218 | 0.002193 | 1 |
| ENSG0000 response | Inflamed | PPAPDC1A  | protein_cc chr10 | 1.22E+08 | 1.22E+08 | + | 2534  | 10.11456 | 0.176611 | -0.89061 | 0.231985 | -3.8391  | 0.000218 | 0.002194 | 1 |
| ENSG0000 response | Inflamed | C2orf88   | protein_cc chr2  | 1.91E+08 | 1.91E+08 | + | 5997  | 1764.74  | 0        | 0.849316 | 0.221242 | 3.838852 | 0.000218 | 0.002195 | 1 |
| ENSG0000 response | Inflamed | DDN       | protein_cc chr12 | 49388932 | 49393092 | - | 3749  | 12.15036 | 0.033413 | -0.59406 | 0.154761 | -3.83855 | 0.000218 | 0.002196 | 1 |
| ENSG0000 response | Inflamed | TIE1      | protein_cc chr1  | 43766664 | 43788779 | + | 6694  | 996.0358 | 0        | -0.80201 | 0.208939 | -3.83847 | 0.000218 | 0.002196 | 1 |
| ENSG0000 response | Inflamed | STOM      | protein_cc chr9  | 1.24E+08 | 1.24E+08 | - | 3188  | 5881.737 | 0        | -0.63278 | 0.164879 | -3.83786 | 0.000219 | 0.0022   | 1 |
| ENSG0000 response | Inflamed | IFFO1     | protein_cc chr12 | 6647541  | 6665239  | - | 5193  | 907.6014 | 0        | -0.57134 | 0.148881 | -3.83759 | 0.000219 | 0.002201 | 1 |
| ENSG0000 response | Inflamed | ARHGAP4   | protein_cc chrX  | 1.53E+08 | 1.53E+08 | - | 5580  | 2951.628 | 0        | -0.50031 | 0.13039  | -3.83699 | 0.000219 | 0.002205 | 1 |
| ENSG0000 response | Inflamed | HP        | protein_cc chr16 | 72088491 | 72094954 | + | 5405  | 12.72076 | 0.200477 | -0.99192 | 0.258542 | -3.83657 | 0.00022  | 0.002207 | 1 |
| ENSG0000 response | Inflamed | DNAJC5B   | protein_cc chr8  | 66933795 | 67012751 | + | 2927  | 26.39618 | 0.011933 | -0.68622 | 0.178903 | -3.83568 | 0.00022  | 0.002214 | 1 |
| ENSG0000 response | Inflamed | NECB2     | protein_cc chr16 | 84002237 | 84036381 | + | 2520  | 7.252983 | 0.238663 | -0.86717 | 0.226099 | -3.83534 | 0.000221 | 0.002215 | 1 |
| ENSG0000 response | Inflamed | GPR146    | protein_cc chr7  | 1084212  | 1098897  | + | 3160  | 188.6253 | 0        | -0.48842 | 0.127352 | -3.83522 | 0.000221 | 0.002215 | 1 |
| ENSG0000 response | Inflamed | ACAT1     | protein_cc chr11 | 1.08E+08 | 1.08E+08 | + | 5584  | 1571.432 | 0        | 0.493255 | 0.128616 | 3.835086 | 0.000221 | 0.002216 | 1 |
| ENSG0000 response | Inflamed | RP4-794H  | lincRNA chr1     | 59486059 | 59510286 | + | 747   | 9.188544 | 0.038186 | -0.58632 | 0.152889 | -3.83491 | 0.000221 | 0.002216 | 1 |
| ENSG0000 response | Inflamed | AC093673  | antisense chr7   | 1.43E+08 | 1.43E+08 | - | 648   | 86.76134 | 0        | -0.51791 | 0.135072 | -3.83435 | 0.000221 | 0.002219 | 1 |
| ENSG0000 response | Inflamed | FAM195A   | protein_cc chr16 | 691813   | 698474   | + | 2226  | 1572.444 | 0        | 0.474529 | 0.123759 | 3.834301 | 0.000222 | 0.002219 | 1 |
| ENSG0000 response | Inflamed | FAM69B    | protein_cc chr9  | 1.4E+08  | 1.4E+08  | + | 2704  | 121.4463 | 0        | -0.72453 | 0.18896  | -3.83428 | 0.000222 | 0.002219 | 1 |
| ENSG0000 response | Inflamed | IGHV3-22  | IG_V_pseu chr14  | 1.07E+08 | 1.07E+08 | - | 359   | 8.181384 | 0.159905 | -0.79463 | 0.207277 | -3.83364 | 0.000222 | 0.002223 | 1 |
| ENSG0000 response | Inflamed | TRADD     | protein_cc chr16 | 67188083 | 67194201 | - | 2567  | 1160.305 | 0        | -0.27905 | 0.072796 | -3.8333  | 0.000222 | 0.002224 | 1 |
| ENSG0000 response | Inflamed | CKMT1B    | protein_cc chr15 | 43885252 | 43897099 | + | 3939  | 1653.16  | 0.002387 | 0.792154 | 0.206651 | 3.833295 | 0.000222 | 0.002224 | 1 |
| ENSG0000 response | Inflamed | RP11-84C1 | pseudoger chr14  | 21451314 | 21453225 | - | 578   | 2.9642   | 0.460621 | 0.454656 | 0.11861  | 3.833212 | 0.000222 | 0.002224 | 1 |
| ENSG0000 response | Inflamed | RP11-558F | antisense chr1   | 9732484  | 9747613  | - | 939   | 31.54654 | 0.002387 | -0.71554 | 0.186678 | -3.833   | 0.000223 | 0.002224 | 1 |
| ENSG0000 response | Inflamed | RP11-290F | lincRNA chr20    | 48909257 | 48931459 | + | 3014  | 32.46778 | 0.019093 | -0.82976 | 0.216498 | -3.83263 | 0.000223 | 0.002226 | 1 |
| ENSG0000 response | Inflamed | RP11-77K1 | protein_cc chr16 | 75562430 | 75579326 | - | 2125  | 1.384248 | 0.653938 | 0.450244 | 0.1175   | 3.83187  | 0.000223 | 0.002232 | 1 |
| ENSG0000 response | Inflamed | CLDN14    | protein_cc chr21 | 37832919 | 37948867 | - | 2853  | 37.84964 | 0.057279 | -0.9704  | 0.253303 | -3.831   | 0.000224 | 0.002238 | 1 |

|                   |          |           |                  |          |          |   |       |          |          |          |          |          |          |          |   |
|-------------------|----------|-----------|------------------|----------|----------|---|-------|----------|----------|----------|----------|----------|----------|----------|---|
| ENSG0000 response | Inflamed | SPN       | protein_cc chr16 | 29674300 | 29682187 | + | 7372  | 1147.675 | 0        | -0.60151 | 0.157023 | -3.8307  | 0.000224 | 0.002239 | 1 |
| ENSG0000 response | Inflamed | RP11-252E | antisense chr16  | 75142499 | 75144610 | - | 1666  | 34.46778 | 0.02864  | 0.803901 | 0.209866 | 3.830537 | 0.000224 | 0.00224  | 1 |
| ENSG0000 response | Inflamed | UBE2L6    | protein_cc chr11 | 57319129 | 57335757 | - | 2197  | 2738.088 | 0        | -0.60578 | 0.158197 | -3.82927 | 0.000225 | 0.002249 | 1 |
| ENSG0000 response | Inflamed | DPP7      | protein_cc chr9  | 1.4E+08  | 1.4E+08  | - | 2820  | 3208.95  | 0        | -0.4983  | 0.130134 | -3.82912 | 0.000226 | 0.002249 | 1 |
| ENSG0000 response | Inflamed | DENND3    | protein_cc chr8  | 1.42E+08 | 1.42E+08 | + | 14670 | 2890.94  | 0        | -0.4944  | 0.129152 | -3.82803 | 0.000226 | 0.002257 | 1 |
| ENSG0000 response | Inflamed | BFSP2-AS1 | antisense chr3   | 1.33E+08 | 1.33E+08 | - | 894   | 3.708831 | 0.326969 | -0.64363 | 0.168138 | -3.82796 | 0.000227 | 0.002257 | 1 |
| ENSG0000 response | Inflamed | RP11-380F | lincRNA chr4     | 23724885 | 23735202 | - | 639   | 14.3747  | 0.212411 | 0.855502 | 0.22351  | 3.827586 | 0.000227 | 0.002259 | 1 |
| ENSG0000 response | Inflamed | ARSD      | protein_cc chrX  | 2822011  | 2847392  | - | 7030  | 3596.747 | 0        | 0.467963 | 0.122265 | 3.827446 | 0.000227 | 0.002259 | 1 |
| ENSG0000 response | Inflamed | XIRP1     | protein_cc chr3  | 39224701 | 39234087 | - | 6467  | 30.57518 | 0.24105  | -1.17279 | 0.306427 | -3.8273  | 0.000227 | 0.002259 | 1 |
| ENSG0000 response | Inflamed | KLRG2     | protein_cc chr7  | 1.39E+08 | 1.39E+08 | - | 2197  | 5.002387 | 0.484487 | 0.997934 | 0.260775 | 3.826801 | 0.000227 | 0.002263 | 1 |
| ENSG0000 response | Inflamed | CCR3      | protein_cc chr3  | 46205096 | 46308197 | + | 3647  | 82.42005 | 0.00716  | -1.10027 | 0.287531 | -3.8266  | 0.000228 | 0.002263 | 1 |
| ENSG0000 response | Inflamed | PYY       | protein_cc chr17 | 42030106 | 42081837 | - | 1181  | 3002.47  | 0        | 1.620074 | 0.423392 | 3.826413 | 0.000228 | 0.002264 | 1 |
| ENSG0000 response | Inflamed | RP11-4161 | antisense chr10  | 1.05E+08 | 1.05E+08 | + | 1432  | 17.70883 | 0.050119 | 0.802374 | 0.209709 | 3.826126 | 0.000228 | 0.002265 | 1 |
| ENSG0000 response | Inflamed | PRR15     | protein_cc chr7  | 29603427 | 29606911 | + | 1982  | 4968.742 | 0.002387 | 1.016961 | 0.265804 | 3.825983 | 0.000228 | 0.002266 | 1 |
| ENSG0000 response | Inflamed | SFXN3     | protein_cc chr10 | 1.03E+08 | 1.03E+08 | + | 4628  | 1754.329 | 0        | -0.3931  | 0.102754 | -3.82563 | 0.000228 | 0.002267 | 1 |
| ENSG0000 response | Inflamed | IGHV3-33  | IG_V_gene chr14  | 1.07E+08 | 1.07E+08 | - | 431   | 5696.236 | 0        | -1.3211  | 0.345335 | -3.82557 | 0.000228 | 0.002267 | 1 |
| ENSG0000 response | Inflamed | GLB1L2    | protein_cc chr11 | 1.34E+08 | 1.34E+08 | + | 7280  | 1628.613 | 0        | 0.588076 | 0.153731 | 3.825353 | 0.000229 | 0.002268 | 1 |
| ENSG0000 response | Inflamed | RP4-673D  | pseudoger chr20  | 1748603  | 1760641  | - | 1564  | 5.121718 | 0.257757 | -0.72764 | 0.190235 | -3.82497 | 0.000229 | 0.00227  | 1 |
| ENSG0000 response | Inflamed | RP11-1791 | lincRNA chr11    | 11139401 | 11205158 | + | 1833  | 8.050119 | 0.155131 | -0.71691 | 0.187431 | -3.82492 | 0.000229 | 0.00227  | 1 |
| ENSG0000 response | Inflamed | AC108463  | pseudoger chr2   | 1.12E+08 | 1.12E+08 | - | 347   | 5.298329 | 0.338902 | -0.76483 | 0.199967 | -3.82477 | 0.000229 | 0.00227  | 1 |
| ENSG0000 response | Inflamed | SATB2     | protein_cc chr2  | 2E+08    | 2E+08    | - | 10958 | 4407.969 | 0        | 0.924596 | 0.241783 | 3.824076 | 0.00023  | 0.002275 | 1 |
| ENSG0000 response | Inflamed | PML       | protein_cc chr15 | 74287014 | 74340153 | + | 12657 | 4104.575 | 0        | -0.46916 | 0.122689 | -3.82394 | 0.00023  | 0.002275 | 1 |
| ENSG0000 response | Inflamed | RHOJ      | protein_cc chr14 | 63670832 | 63759937 | + | 3793  | 422.8568 | 0        | -0.72015 | 0.188329 | -3.8239  | 0.00023  | 0.002275 | 1 |
| ENSG0000 response | Inflamed | COMP      | protein_cc chr19 | 18893583 | 18902123 | - | 3100  | 11.06444 | 0.50358  | -1.14482 | 0.299411 | -3.82356 | 0.00023  | 0.002277 | 1 |
| ENSG0000 response | Inflamed | FKBP4     | protein_cc chr12 | 2904119  | 2914576  | + | 3958  | 4711.131 | 0        | 0.319692 | 0.083629 | 3.822727 | 0.000231 | 0.002282 | 1 |
| ENSG0000 response | Inflamed | SCYL1     | protein_cc chr11 | 65292548 | 65306175 | + | 4282  | 3730.542 | 0        | -0.25448 | 0.066581 | -3.82209 | 0.000231 | 0.002287 | 1 |
| ENSG0000 response | Inflamed | RP5-10071 | antisense chr1   | 90048800 | 90098453 | - | 2088  | 18.50358 | 0.004773 | -0.49333 | 0.129079 | -3.82188 | 0.000231 | 0.002288 | 1 |
| ENSG0000 response | Inflamed | RP11-1591 | antisense chr11  | 27493276 | 27503980 | + | 1576  | 8.181384 | 0.167064 | 0.747028 | 0.195514 | 3.820839 | 0.000232 | 0.002295 | 1 |
| ENSG0000 response | Inflamed | DHRS1     | protein_cc chr14 | 24759804 | 24769039 | - | 5002  | 1135.172 | 0        | 0.286683 | 0.075042 | 3.820295 | 0.000233 | 0.002299 | 1 |
| ENSG0000 response | Inflamed | C1orf228  | protein_cc chr1  | 45140364 | 45191263 | + | 3166  | 90.80191 | 0        | -0.76125 | 0.199355 | -3.81859 | 0.000234 | 0.002312 | 1 |
| ENSG0000 response | Inflamed | LINC00185 | sense_ove chr21  | 30565801 | 30660526 | + | 1087  | 6.372315 | 0.238663 | -0.65462 | 0.171479 | -3.81751 | 0.000235 | 0.00232  | 1 |
| ENSG0000 response | Inflamed | MMP28     | protein_cc chr17 | 34083268 | 34122711 | - | 3181  | 1821.632 | 0        | 0.728606 | 0.190877 | 3.817151 | 0.000235 | 0.002322 | 1 |
| ENSG0000 response | Inflamed | LRP8      | protein_cc chr1  | 53711217 | 53793742 | - | 7077  | 361.0835 | 0.002387 | -0.82779 | 0.216871 | -3.81697 | 0.000235 | 0.002322 | 1 |
| ENSG0000 response | Inflamed | SLC29A4   | protein_cc chr7  | 5314000  | 5346501  | + | 5811  | 353.8663 | 0        | 0.598546 | 0.15684  | 3.816285 | 0.000236 | 0.002327 | 1 |
| ENSG0000 response | Inflamed | PLXNC1    | protein_cc chr12 | 94542499 | 94701451 | + | 9887  | 1259.842 | 0        | -0.77477 | 0.203029 | -3.81607 | 0.000236 | 0.002328 | 1 |
| ENSG0000 response | Inflamed | C2orf82   | protein_cc chr2  | 2.34E+08 | 2.34E+08 | + | 3698  | 929.0048 | 0        | 0.727817 | 0.190737 | 3.815808 | 0.000236 | 0.002329 | 1 |
| ENSG0000 response | Inflamed | WTIP      | protein_cc chr19 | 34971874 | 34997258 | + | 8262  | 254.2434 | 0        | -0.61752 | 0.161836 | -3.81572 | 0.000237 | 0.002329 | 1 |
| ENSG0000 response | Inflamed | FAM209B   | protein_cc chr20 | 55108302 | 55111576 | + | 694   | 6.747017 | 0.121718 | -0.56136 | 0.147122 | -3.81562 | 0.000237 | 0.002329 | 1 |
| ENSG0000 response | Inflamed | F11R      | protein_cc chr1  | 1.61E+08 | 1.61E+08 | - | 2114  | 9.071599 | 0.102625 | 0.595823 | 0.156159 | 3.815493 | 0.000237 | 0.002329 | 1 |
| ENSG0000 response | Inflamed | ZYX       | protein_cc chr7  | 1.43E+08 | 1.43E+08 | + | 3482  | 7816.227 | 0        | -0.52418 | 0.137441 | -3.81383 | 0.000238 | 0.002341 | 1 |

|                   |          |           |                  |          |          |   |       |          |          |          |          |          |          |          |   |
|-------------------|----------|-----------|------------------|----------|----------|---|-------|----------|----------|----------|----------|----------|----------|----------|---|
| ENSG0000 response | Inflamed | FGF7      | protein_cc chr15 | 49715293 | 49780972 | + | 6657  | 384.3699 | 0        | -0.99189 | 0.260079 | -3.8138  | 0.000238 | 0.002341 | 1 |
| ENSG0000 response | Inflamed | TRPM6     | protein_cc chr9  | 77337411 | 77503010 | - | 9287  | 1812.153 | 0.002387 | 1.394271 | 0.365642 | 3.813215 | 0.000239 | 0.002345 | 1 |
| ENSG0000 response | Inflamed | PACSN1    | protein_cc chr6  | 34433916 | 34503006 | + | 4712  | 51.01909 | 0.011933 | -0.82339 | 0.215939 | -3.81304 | 0.000239 | 0.002346 | 1 |
| ENSG0000 response | Inflamed | NOXA1     | protein_cc chr9  | 1.4E+08  | 1.4E+08  | + | 1678  | 918.5513 | 0        | 0.614702 | 0.161218 | 3.812857 | 0.000239 | 0.002346 | 1 |
| ENSG0000 response | Inflamed | NPL       | protein_cc chr1  | 1.83E+08 | 1.83E+08 | + | 4975  | 456.7804 | 0        | -0.57625 | 0.151142 | -3.81261 | 0.000239 | 0.002348 | 1 |
| ENSG0000 response | Inflamed | DEGS2     | protein_cc chr14 | 1.01E+08 | 1.01E+08 | - | 2004  | 887.6396 | 0        | 0.785275 | 0.206022 | 3.81161  | 0.00024  | 0.002354 | 1 |
| ENSG0000 response | Inflamed | NHSL1     | protein_cc chr6  | 1.39E+08 | 1.39E+08 | - | 8741  | 4314.566 | 0        | 0.702004 | 0.184179 | 3.811523 | 0.00024  | 0.002354 | 1 |
| ENSG0000 response | Inflamed | MT-TC     | Mt_tRNA chrM     | 5761     | 5826     | - | 66    | 53.358   | 0        | 0.686218 | 0.18004  | 3.81147  | 0.00024  | 0.002354 | 1 |
| ENSG0000 response | Inflamed | PSAT1P3   | pseudoger chr1   | 79520630 | 79521740 | - | 1111  | 1.040573 | 0.739857 | -0.41929 | 0.110008 | -3.81142 | 0.00024  | 0.002354 | 1 |
| ENSG0000 response | Inflamed | RAX       | protein_cc chr18 | 56934267 | 56941318 | - | 3725  | 6.627685 | 0.632458 | -1.12976 | 0.29644  | -3.8111  | 0.00024  | 0.002356 | 1 |
| ENSG0000 response | Inflamed | PLXNA2    | protein_cc chr1  | 2.08E+08 | 2.08E+08 | - | 13781 | 5104.742 | 0        | 0.59567  | 0.15631  | 3.810826 | 0.000241 | 0.002357 | 1 |
| ENSG0000 response | Inflamed | RP11-168C | lincRNA chr1     | 2.01E+08 | 2.01E+08 | + | 3508  | 8.164678 | 0.157518 | -0.68969 | 0.180985 | -3.81075 | 0.000241 | 0.002357 | 1 |
| ENSG0000 response | Inflamed | CTD-2524L | antisense chr15  | 72110737 | 72115725 | + | 896   | 0.794749 | 0.782816 | 0.350986 | 0.09211  | 3.810511 | 0.000241 | 0.002357 | 1 |
| ENSG0000 response | Inflamed | ACOT11    | protein_cc chr1  | 55007930 | 55104865 | + | 9768  | 3332.597 | 0        | 0.63054  | 0.165475 | 3.810495 | 0.000241 | 0.002357 | 1 |
| ENSG0000 response | Inflamed | IGHV4-4   | IG_V_gene chr14  | 1.06E+08 | 1.06E+08 | - | 412   | 2983.057 | 0        | -1.08615 | 0.28505  | -3.81039 | 0.000241 | 0.002357 | 1 |
| ENSG0000 response | Inflamed | RP11-567C | lincRNA chr12    | 90501516 | 90506556 | + | 926   | 12.21002 | 0.174224 | 0.894314 | 0.234722 | 3.810096 | 0.000241 | 0.002359 | 1 |
| ENSG0000 response | Inflamed | MT-ND3    | protein_cc chrM  | 10059    | 10404    | + | 346   | 137287.9 | 0        | 0.572426 | 0.150257 | 3.809652 | 0.000242 | 0.002362 | 1 |
| ENSG0000 response | Inflamed | CTB-12A17 | antisense chr19  | 47112534 | 47114036 | - | 296   | 5.684964 | 0.298329 | -0.74505 | 0.195662 | -3.80787 | 0.000243 | 0.002376 | 1 |
| ENSG0000 response | Inflamed | RP11-84D  | antisense chr1   | 25287836 | 25289588 | + | 820   | 10.35084 | 0.081146 | -0.7411  | 0.19468  | -3.80678 | 0.000244 | 0.002384 | 1 |
| ENSG0000 response | Inflamed | TMEM184   | protein_cc chr7  | 1581871  | 1600457  | - | 7805  | 3215.21  | 0        | 0.749035 | 0.196789 | 3.80628  | 0.000245 | 0.002387 | 1 |
| ENSG0000 response | Inflamed | IGKV1OR2  | IG_V_gene chr2   | 1.14E+08 | 1.14E+08 | + | 390   | 47.05251 | 0.038186 | -1.12009 | 0.294281 | -3.8062  | 0.000245 | 0.002387 | 1 |
| ENSG0000 response | Inflamed | PRLR      | protein_cc chr5  | 35048861 | 35230794 | - | 13208 | 445.8234 | 0        | 0.988671 | 0.25976  | 3.806096 | 0.000245 | 0.002387 | 1 |
| ENSG0000 response | Inflamed | IGHV2-5   | IG_V_gene chr14  | 1.06E+08 | 1.06E+08 | - | 377   | 6412.215 | 0        | -1.13079 | 0.297123 | -3.8058  | 0.000245 | 0.002388 | 1 |
| ENSG0000 response | Inflamed | CD276     | protein_cc chr15 | 73976307 | 74006859 | + | 5542  | 3026.611 | 0        | -0.47632 | 0.125156 | -3.8058  | 0.000245 | 0.002388 | 1 |
| ENSG0000 response | Inflamed | IGHV1OR1  | IG_V_gene chr15  | 22448382 | 22448819 | - | 353   | 131.7255 | 0        | -0.88892 | 0.233603 | -3.80524 | 0.000245 | 0.002391 | 1 |
| ENSG0000 response | Inflamed | FCGBP     | protein_cc chr19 | 40353963 | 40440533 | - | 16564 | 184371.1 | 0        | 1.095934 | 0.288012 | 3.805167 | 0.000245 | 0.002391 | 1 |
| ENSG0000 response | Inflamed | SLC39A2   | protein_cc chr14 | 21467414 | 21470030 | + | 1575  | 38.12649 | 0.152745 | 1.121325 | 0.294725 | 3.804654 | 0.000246 | 0.002395 | 1 |
| ENSG0000 response | Inflamed | LINC00565 | lincRNA chr13    | 1.15E+08 | 1.15E+08 | - | 2331  | 10.31504 | 0.174224 | -0.75581 | 0.198704 | -3.80372 | 0.000247 | 0.002401 | 1 |
| ENSG0000 response | Inflamed | AC078883  | antisense chr2   | 1.73E+08 | 1.73E+08 | - | 558   | 10.79236 | 0.042959 | 0.578615 | 0.15212  | 3.803684 | 0.000247 | 0.002401 | 1 |
| ENSG0000 response | Inflamed | CRMP1     | protein_cc chr4  | 5749811  | 5894785  | - | 5823  | 184.9857 | 0        | -0.64604 | 0.169856 | -3.80347 | 0.000247 | 0.002402 | 1 |
| ENSG0000 response | Inflamed | GALNT2    | protein_cc chr1  | 2.3E+08  | 2.3E+08  | + | 7944  | 6470.134 | 0        | -0.37246 | 0.097936 | -3.80304 | 0.000247 | 0.002405 | 1 |
| ENSG0000 response | Inflamed | TMEM183   | protein_cc chr1  | 2.03E+08 | 2.03E+08 | + | 4026  | 1761.678 | 0        | 0.250924 | 0.065986 | 3.802657 | 0.000248 | 0.002406 | 1 |
| ENSG0000 response | Inflamed | RP11-678C | lincRNA chr19    | 21753624 | 21770124 | - | 1178  | 18.33174 | 0.176611 | 0.896942 | 0.235873 | 3.802647 | 0.000248 | 0.002406 | 1 |
| ENSG0000 response | Inflamed | GPR125    | protein_cc chr4  | 22346694 | 22517677 | - | 9241  | 1957.649 | 0        | 0.582049 | 0.153067 | 3.802582 | 0.000248 | 0.002406 | 1 |
| ENSG0000 response | Inflamed | LILRP1    | pseudoger chr19  | 55208383 | 55212683 | + | 1370  | 9.670644 | 0.353222 | -0.88188 | 0.231965 | -3.80179 | 0.000248 | 0.002411 | 1 |
| ENSG0000 response | Inflamed | SUCLG2    | protein_cc chr3  | 67410884 | 67705038 | - | 3090  | 4987.007 | 0        | 0.547848 | 0.144103 | 3.801782 | 0.000248 | 0.002411 | 1 |
| ENSG0000 response | Inflamed | RP11-455F | antisense chr16  | 30107751 | 30115437 | + | 1650  | 24.50119 | 0        | -0.60003 | 0.157834 | -3.80168 | 0.000249 | 0.002411 | 1 |
| ENSG0000 response | Inflamed | ANKRD53   | protein_cc chr2  | 71205510 | 71212626 | + | 2523  | 31.61098 | 0.009547 | -0.69937 | 0.183973 | -3.80148 | 0.000249 | 0.002412 | 1 |
| ENSG0000 response | Inflamed | RP11-103C | antisense chr3   | 1.5E+08  | 1.5E+08  | + | 827   | 15.39618 | 0.002387 | -0.53781 | 0.141485 | -3.80116 | 0.000249 | 0.002414 | 1 |
| ENSG0000 response | Inflamed | SCN2A     | protein_cc chr2  | 1.66E+08 | 1.66E+08 | + | 12338 | 7.713604 | 0.27685  | -0.8818  | 0.231999 | -3.8009  | 0.000249 | 0.002415 | 1 |

|                   |          |           |                  |          |          |   |      |          |          |          |          |          |          |          |   |
|-------------------|----------|-----------|------------------|----------|----------|---|------|----------|----------|----------|----------|----------|----------|----------|---|
| ENSG0000 response | Inflamed | DLG4      | protein_cc chr17 | 7093209  | 7123021  | - | 5746 | 528.5895 | 0        | -0.57717 | 0.151861 | -3.80063 | 0.000249 | 0.002416 | 1 |
| ENSG0000 response | Inflamed | ZSCAN16-1 | antisense chr6   | 28089573 | 28105071 | - | 2163 | 72.73031 | 0        | -0.46961 | 0.123582 | -3.80001 | 0.00025  | 0.002421 | 1 |
| ENSG0000 response | Inflamed | PON3      | protein_cc chr7  | 94989256 | 95025680 | - | 4040 | 52.94511 | 0.004773 | 0.677259 | 0.178235 | 3.79981  | 0.00025  | 0.002421 | 1 |
| ENSG0000 response | Inflamed | RTN1      | protein_cc chr14 | 60062694 | 60337684 | - | 6209 | 222.7852 | 0.004773 | -0.61037 | 0.160633 | -3.79976 | 0.00025  | 0.002421 | 1 |
| ENSG0000 response | Inflamed | DLL3      | protein_cc chr19 | 39989535 | 39999121 | + | 2618 | 4.682578 | 0.221957 | -0.67681 | 0.178165 | -3.7988  | 0.000251 | 0.002428 | 1 |
| ENSG0000 response | Inflamed | MLK4      | protein_cc chr1  | 2.33E+08 | 2.34E+08 | + | 7916 | 700.6396 | 0        | 0.697226 | 0.183583 | 3.797886 | 0.000252 | 0.002435 | 1 |
| ENSG0000 response | Inflamed | RP11-121M | lincRNA chr11    | 1.3E+08  | 1.3E+08  | + | 957  | 6.627685 | 0.093079 | 0.50475  | 0.132907 | 3.797766 | 0.000252 | 0.002435 | 1 |
| ENSG0000 response | Inflamed | NRSN2     | protein_cc chr20 | 327426   | 340304   | + | 2928 | 650.9833 | 0        | -0.45361 | 0.11946  | -3.79716 | 0.000253 | 0.00244  | 1 |
| ENSG0000 response | Inflamed | AC187652  | protein_cc chr7  | 302918   | 304070   | + | 501  | 4.72315  | 0.360382 | -0.72215 | 0.190202 | -3.79672 | 0.000253 | 0.002443 | 1 |
| ENSG0000 response | Inflamed | SHISA5    | protein_cc chr3  | 48509197 | 48542259 | - | 4586 | 6936.496 | 0        | -0.30662 | 0.080766 | -3.79642 | 0.000253 | 0.002444 | 1 |
| ENSG0000 response | Inflamed | PPDPF     | protein_cc chr20 | 62152077 | 62153559 | + | 1094 | 13327.78 | 0        | 0.408925 | 0.107737 | 3.795602 | 0.000254 | 0.00245  | 1 |
| ENSG0000 response | Inflamed | GTF3A     | protein_cc chr13 | 27998681 | 28009958 | + | 2999 | 1709.017 | 0        | -0.32895 | 0.086671 | -3.79542 | 0.000254 | 0.002451 | 1 |
| ENSG0000 response | Inflamed | LHB       | protein_cc chr19 | 49519237 | 49520338 | - | 514  | 2.472554 | 0.470167 | -0.52045 | 0.137129 | -3.79535 | 0.000254 | 0.002451 | 1 |
| ENSG0000 response | Inflamed | ADORA2A-  | antisense chr22  | 24825178 | 24891042 | - | 4033 | 1.739857 | 0.71599  | -0.43587 | 0.114853 | -3.79505 | 0.000254 | 0.002453 | 1 |
| ENSG0000 response | Inflamed | NAPSB     | pseudoger chr19  | 50837053 | 50848024 | - | 1915 | 504.9714 | 0        | -0.75597 | 0.199212 | -3.79479 | 0.000255 | 0.002454 | 1 |
| ENSG0000 response | Inflamed | IGHV3-48  | IG_V_gene chr14  | 1.07E+08 | 1.07E+08 | - | 430  | 7492.358 | 0        | -1.21122 | 0.319187 | -3.7947  | 0.000255 | 0.002454 | 1 |
| ENSG0000 response | Inflamed | CSF2RBP1  | pseudoger chr22  | 37346571 | 37349764 | - | 391  | 2.281623 | 0.675418 | -0.66177 | 0.174405 | -3.79446 | 0.000255 | 0.002454 | 1 |
| ENSG0000 response | Inflamed | RNASE3    | protein_cc chr14 | 21359558 | 21360507 | + | 720  | 2.281623 | 0.568019 | -0.52764 | 0.139056 | -3.79444 | 0.000255 | 0.002454 | 1 |
| ENSG0000 response | Inflamed | PRELID2   | protein_cc chr5  | 1.45E+08 | 1.45E+08 | - | 5375 | 668.7112 | 0        | 0.766278 | 0.201961 | 3.794183 | 0.000255 | 0.002455 | 1 |
| ENSG0000 response | Inflamed | DDR1      | protein_cc chr6  | 30844198 | 30867933 | + | 9122 | 13905.37 | 0        | 0.527826 | 0.139136 | 3.793594 | 0.000256 | 0.00246  | 1 |
| ENSG0000 response | Inflamed | SCAMP5    | protein_cc chr15 | 75249560 | 75313837 | + | 4874 | 1130.535 | 0        | -0.63741 | 0.168126 | -3.79124 | 0.000258 | 0.002479 | 1 |
| ENSG0000 response | Inflamed | TSPAN11   | protein_cc chr12 | 31079362 | 31149534 | + | 7113 | 3399.186 | 0        | -0.73378 | 0.19355  | -3.79116 | 0.000258 | 0.002479 | 1 |
| ENSG0000 response | Inflamed | LINC01006 | processed_chr7   | 1.56E+08 | 1.56E+08 | - | 2246 | 54.91647 | 0        | 0.678832 | 0.179067 | 3.790933 | 0.000258 | 0.00248  | 1 |
| ENSG0000 response | Inflamed | NCKAP1L   | protein_cc chr12 | 54891495 | 54937726 | + | 6300 | 1969.05  | 0        | -0.64738 | 0.170786 | -3.79061 | 0.000258 | 0.002482 | 1 |
| ENSG0000 response | Inflamed | SIGLEC19P | pseudoger chr19  | 51647083 | 51647453 | + | 371  | 2.639618 | 0.424821 | -0.54262 | 0.143162 | -3.79023 | 0.000259 | 0.002484 | 1 |
| ENSG0000 response | Inflamed | RP11-247L | lincRNA chr14    | 50793244 | 50794627 | - | 446  | 41.73747 | 0.011933 | 0.745356 | 0.19667  | 3.789878 | 0.000259 | 0.002487 | 1 |
| ENSG0000 response | Inflamed | CAHM      | lincRNA chr6     | 1.64E+08 | 1.64E+08 | - | 896  | 9.914081 | 0.071599 | -0.63051 | 0.166377 | -3.78963 | 0.000259 | 0.002488 | 1 |
| ENSG0000 response | Inflamed | RSPO1     | protein_cc chr1  | 38076951 | 38100595 | - | 3160 | 67.55847 | 0.01432  | -0.894   | 0.23593  | -3.78925 | 0.00026  | 0.00249  | 1 |
| ENSG0000 response | Inflamed | DTX1      | protein_cc chr12 | 1.13E+08 | 1.14E+08 | + | 4387 | 490.5704 | 0        | -0.8146  | 0.215046 | -3.78801 | 0.000261 | 0.0025   | 1 |
| ENSG0000 response | Inflamed | ARL14     | protein_cc chr3  | 1.6E+08  | 1.6E+08  | + | 1286 | 938.9141 | 0.002387 | 0.959835 | 0.253409 | 3.787683 | 0.000261 | 0.002502 | 1 |
| ENSG0000 response | Inflamed | DAGLA     | protein_cc chr11 | 61447905 | 61514473 | + | 5757 | 1147     | 0        | 0.536287 | 0.141601 | 3.787308 | 0.000261 | 0.002505 | 1 |
| ENSG0000 response | Inflamed | TEAD4     | protein_cc chr12 | 3068496  | 3149839  | + | 2272 | 426.4821 | 0        | -0.49919 | 0.131815 | -3.78703 | 0.000262 | 0.002506 | 1 |
| ENSG0000 response | Inflamed | IL7R      | protein_cc chr5  | 35852797 | 35879705 | + | 6060 | 2248.778 | 0        | -1.14601 | 0.30264  | -3.7867  | 0.000262 | 0.002508 | 1 |
| ENSG0000 response | Inflamed | RP11-168F | lincRNA chr1     | 3403810  | 3404191  | + | 382  | 11.12172 | 0.114558 | 0.677381 | 0.178895 | 3.786478 | 0.000262 | 0.002509 | 1 |
| ENSG0000 response | Inflamed | CBX4      | protein_cc chr17 | 77806955 | 77813228 | - | 2880 | 1033.885 | 0        | -0.45133 | 0.119198 | -3.78634 | 0.000262 | 0.002509 | 1 |
| ENSG0000 response | Inflamed | RP11-96D  | antisense chr16  | 68259872 | 68263048 | - | 3177 | 741.6587 | 0        | 0.863456 | 0.228102 | 3.785386 | 0.000263 | 0.002517 | 1 |
| ENSG0000 response | Inflamed | GNG12-AS  | antisense chr1   | 68297986 | 68668670 | + | 3465 | 11.41527 | 0.081146 | 0.652651 | 0.172433 | 3.784965 | 0.000264 | 0.00252  | 1 |
| ENSG0000 response | Inflamed | CCDC78    | protein_cc chr16 | 772582   | 776954   | - | 4147 | 32.05251 | 0.023866 | -0.79925 | 0.211184 | -3.78461 | 0.000264 | 0.002521 | 1 |
| ENSG0000 response | Inflamed | U73169.1  | pseudoger chr3   | 50277054 | 50277416 | + | 359  | 5.109785 | 0.24821  | -0.68753 | 0.181666 | -3.78459 | 0.000264 | 0.002521 | 1 |
| ENSG0000 response | Inflamed | MIR3131   | miRNA chr2       | 2.2E+08  | 2.2E+08  | - | 63   | 8.99284  | 0.126492 | 0.642519 | 0.169854 | 3.782774 | 0.000266 | 0.002536 | 1 |

|                   |          |                      |       |          |          |   |       |          |          |          |          |          |          |          |   |
|-------------------|----------|----------------------|-------|----------|----------|---|-------|----------|----------|----------|----------|----------|----------|----------|---|
| ENSG0000 response | Inflamed | ANKRD26F pseudoger   | chr16 | 46503253 | 46603009 | - | 6411  | 1.675418 | 0.701671 | -0.64781 | 0.171316 | -3.78138 | 0.000267 | 0.002548 | 1 |
| ENSG0000 response | Inflamed | RP11-362L sense_intr | chr14 | 1.01E+08 | 1.01E+08 | + | 606   | 1.653938 | 0.553699 | 0.437724 | 0.11581  | 3.779668 | 0.000269 | 0.002562 | 1 |
| ENSG0000 response | Inflamed | RASGRP2 protein_cc   | chr11 | 64494383 | 64512928 | - | 6084  | 814.4153 | 0        | -0.89372 | 0.236458 | -3.7796  | 0.000269 | 0.002562 | 1 |
| ENSG0000 response | Inflamed | MIR31HG sense_ove    | chr9  | 21455641 | 21559668 | - | 745   | 7.799523 | 0.441527 | -1.02536 | 0.271301 | -3.77943 | 0.000269 | 0.002563 | 1 |
| ENSG0000 response | Inflamed | TAS1R1 protein_cc    | chr1  | 6615241  | 6639817  | + | 2892  | 8.353222 | 0.066826 | -0.66656 | 0.176399 | -3.7787  | 0.000269 | 0.002568 | 1 |
| ENSG0000 response | Inflamed | MMP13 protein_cc     | chr11 | 1.03E+08 | 1.03E+08 | - | 2834  | 133.4678 | 0.384248 | -1.95164 | 0.516586 | -3.77795 | 0.00027  | 0.002574 | 1 |
| ENSG0000 response | Inflamed | CLPB protein_cc      | chr11 | 72003469 | 72145692 | - | 4232  | 492.0883 | 0        | -0.33668 | 0.089124 | -3.77759 | 0.00027  | 0.002576 | 1 |
| ENSG0000 response | Inflamed | CTD-2024F antisense  | chr5  | 34656517 | 34657355 | - | 407   | 1.128878 | 0.749403 | -0.46628 | 0.123447 | -3.77714 | 0.000271 | 0.002579 | 1 |
| ENSG0000 response | Inflamed | HOXB9 protein_cc     | chr17 | 46698518 | 46703839 | - | 2705  | 3431.938 | 0        | 0.825922 | 0.218708 | 3.776374 | 0.000272 | 0.002585 | 1 |
| ENSG0000 response | Inflamed | EDN2 protein_cc      | chr1  | 41944446 | 41950344 | - | 1639  | 104.0143 | 0.038186 | 1.150913 | 0.304768 | 3.776356 | 0.000272 | 0.002585 | 1 |
| ENSG0000 response | Inflamed | DEFB4A protein_cc    | chr8  | 7752151  | 7754233  | + | 380   | 94.69928 | 0.424821 | -1.89362 | 0.501451 | -3.77627 | 0.000272 | 0.002585 | 1 |
| ENSG0000 response | Inflamed | RP1-239B2 antisense  | chr11 | 17402196 | 17405078 | + | 2883  | 178.864  | 0        | 0.680805 | 0.180305 | 3.775861 | 0.000272 | 0.002587 | 1 |
| ENSG0000 response | Inflamed | HMHA1 protein_cc     | chr19 | 1065922  | 1086627  | + | 6497  | 3783.081 | 0        | -0.49131 | 0.130135 | -3.77538 | 0.000273 | 0.002591 | 1 |
| ENSG0000 response | Inflamed | ZNF71 protein_cc     | chr19 | 57106632 | 57137849 | + | 6170  | 237.4463 | 0        | -0.35872 | 0.095036 | -3.77462 | 0.000273 | 0.002596 | 1 |
| ENSG0000 response | Inflamed | FHDC1 protein_cc     | chr4  | 1.54E+08 | 1.54E+08 | + | 6593  | 1347.84  | 0        | 0.571847 | 0.151499 | 3.774602 | 0.000273 | 0.002596 | 1 |
| ENSG0000 response | Inflamed | QARS protein_cc      | chr3  | 49133365 | 49142553 | - | 4576  | 9419.379 | 0        | 0.341838 | 0.090568 | 3.77439  | 0.000274 | 0.002597 | 1 |
| ENSG0000 response | Inflamed | RP11-153H pseudoger  | chr4  | 1.55E+08 | 1.55E+08 | + | 3277  | 11.78759 | 0.317422 | -1.06204 | 0.281399 | -3.77415 | 0.000274 | 0.002598 | 1 |
| ENSG0000 response | Inflamed | MARK4 protein_cc     | chr19 | 45582546 | 45808541 | + | 6668  | 878.9141 | 0        | -0.40088 | 0.106219 | -3.77406 | 0.000274 | 0.002598 | 1 |
| ENSG0000 response | Inflamed | DCPS protein_cc      | chr11 | 1.26E+08 | 1.26E+08 | + | 3352  | 717.6062 | 0        | -0.32801 | 0.086918 | -3.77382 | 0.000274 | 0.002599 | 1 |
| ENSG0000 response | Inflamed | ADAMTS5 protein_cc   | chr21 | 28290231 | 28338832 | - | 9056  | 227.4988 | 0.002387 | -0.78511 | 0.208046 | -3.77373 | 0.000274 | 0.002599 | 1 |
| ENSG0000 response | Inflamed | EPB41L4B protein_cc  | chr9  | 1.12E+08 | 1.12E+08 | - | 7879  | 4696.857 | 0        | 0.945755 | 0.25062  | 3.773658 | 0.000274 | 0.002599 | 1 |
| ENSG0000 response | Inflamed | GRINA protein_cc     | chr8  | 1.45E+08 | 1.45E+08 | + | 2527  | 6569.487 | 0        | -0.46432 | 0.123047 | -3.77349 | 0.000274 | 0.002599 | 1 |
| ENSG0000 response | Inflamed | GATA6-AS lincRNA     | chr18 | 19746859 | 19748929 | - | 1823  | 136.9952 | 0.004773 | 0.91865  | 0.243497 | 3.772729 | 0.000275 | 0.002605 | 1 |
| ENSG0000 response | Inflamed | CELF5 protein_cc     | chr19 | 3224701  | 3297074  | + | 6024  | 23.24821 | 0.038186 | 0.715198 | 0.189656 | 3.771037 | 0.000277 | 0.00262  | 1 |
| ENSG0000 response | Inflamed | IGF2BP3 protein_cc   | chr7  | 23349828 | 23510086 | - | 8511  | 71.11217 | 0.050119 | -1.10592 | 0.293315 | -3.77043 | 0.000277 | 0.002624 | 1 |
| ENSG0000 response | Inflamed | RPS3AP40 pseudoger   | chr11 | 67693122 | 67693902 | - | 781   | 1.293556 | 0.692124 | 0.465473 | 0.123455 | 3.770388 | 0.000277 | 0.002624 | 1 |
| ENSG0000 response | Inflamed | RAVER2 protein_cc    | chr1  | 65210778 | 65298915 | + | 6070  | 2021.63  | 0        | 0.711485 | 0.188729 | 3.769871 | 0.000278 | 0.002628 | 1 |
| ENSG0000 response | Inflamed | AQP8 protein_cc      | chr16 | 25227052 | 25240261 | + | 1421  | 12233.81 | 0.019093 | 2.711327 | 0.719231 | 3.769757 | 0.000278 | 0.002628 | 1 |
| ENSG0000 response | Inflamed | MYH10 protein_cc     | chr17 | 8377523  | 8534079  | - | 9029  | 746.2243 | 0        | -0.87912 | 0.233257 | -3.7689  | 0.000279 | 0.002635 | 1 |
| ENSG0000 response | Inflamed | ZNF385A protein_cc   | chr12 | 54762917 | 54785082 | - | 3179  | 1027.119 | 0        | -0.58231 | 0.15451  | -3.76874 | 0.000279 | 0.002635 | 1 |
| ENSG0000 response | Inflamed | AK1 protein_cc       | chr9  | 1.31E+08 | 1.31E+08 | - | 2667  | 507.6683 | 0        | 0.562322 | 0.149244 | 3.767795 | 0.00028  | 0.002643 | 1 |
| ENSG0000 response | Inflamed | CBLC protein_cc      | chr19 | 45281126 | 45303891 | + | 1579  | 2275.47  | 0        | 0.735542 | 0.195238 | 3.767409 | 0.00028  | 0.002646 | 1 |
| ENSG0000 response | Inflamed | ATP5B protein_cc     | chr12 | 57031959 | 57039798 | - | 2268  | 31116.93 | 0        | 0.369226 | 0.09802  | 3.766831 | 0.000281 | 0.00265  | 1 |
| ENSG0000 response | Inflamed | ERC2 protein_cc      | chr3  | 55542336 | 56502391 | - | 7933  | 5.138425 | 0.26969  | -0.72688 | 0.192979 | -3.76663 | 0.000281 | 0.002651 | 1 |
| ENSG0000 response | Inflamed | MCF2L protein_cc     | chr13 | 1.14E+08 | 1.14E+08 | + | 23204 | 3256.573 | 0        | 0.502925 | 0.133533 | 3.766282 | 0.000281 | 0.002653 | 1 |
| ENSG0000 response | Inflamed | CEBPA protein_cc     | chr19 | 33790840 | 33793470 | - | 2631  | 390.9212 | 0        | 0.555113 | 0.147413 | 3.7657   | 0.000282 | 0.002658 | 1 |
| ENSG0000 response | Inflamed | SPNS3 protein_cc     | chr17 | 4336983  | 4391503  | + | 2684  | 70.57518 | 0        | -0.51494 | 0.136778 | -3.76482 | 0.000283 | 0.002665 | 1 |
| ENSG0000 response | Inflamed | SIRT6 protein_cc     | chr19 | 4174106  | 4182601  | - | 2787  | 2351.597 | 0        | 0.416268 | 0.110582 | 3.764323 | 0.000283 | 0.002669 | 1 |
| ENSG0000 response | Inflamed | TNFRSF13C protein_cc | chr22 | 42321045 | 42322822 | - | 926   | 169.7422 | 0.002387 | -1.01507 | 0.269714 | -3.7635  | 0.000284 | 0.002676 | 1 |
| ENSG0000 response | Inflamed | NR3C2 protein_cc     | chr4  | 1.49E+08 | 1.49E+08 | - | 6607  | 2936.229 | 0        | 0.955098 | 0.253834 | 3.762693 | 0.000285 | 0.002682 | 1 |

|                   |          |           |                  |          |          |   |       |          |          |          |          |          |          |          |   |
|-------------------|----------|-----------|------------------|----------|----------|---|-------|----------|----------|----------|----------|----------|----------|----------|---|
| ENSG0000 response | Inflamed | HGF       | protein_cc chr7  | 81328322 | 81399754 | - | 8897  | 435.4654 | 0.002387 | -1.09506 | 0.291042 | -3.76254 | 0.000285 | 0.002682 | 1 |
| ENSG0000 response | Inflamed | FOXS1     | protein_cc chr20 | 30432103 | 30433420 | - | 1318  | 60.91408 | 0.004773 | -0.87679 | 0.233038 | -3.76243 | 0.000285 | 0.002682 | 1 |
| ENSG0000 response | Inflamed | RP1-1700  | lincRNA chr7     | 27226192 | 27233067 | - | 556   | 48.48449 | 0.054893 | 0.71134  | 0.189065 | 3.762408 | 0.000285 | 0.002682 | 1 |
| ENSG0000 response | Inflamed | TMEM106   | protein_cc chr12 | 48357352 | 48362661 | + | 3348  | 3366.635 | 0        | 0.505342 | 0.134317 | 3.762307 | 0.000285 | 0.002682 | 1 |
| ENSG0000 response | Inflamed | ADPGK-AS  | antisense chr15  | 73075176 | 73090540 | + | 3138  | 9.147971 | 0.066826 | -0.62969 | 0.167406 | -3.76145 | 0.000286 | 0.002689 | 1 |
| ENSG0000 response | Inflamed | ATG7      | protein_cc chr3  | 11313995 | 11599139 | + | 8833  | 1013.098 | 0        | -0.25854 | 0.068743 | -3.76096 | 0.000287 | 0.002693 | 1 |
| ENSG0000 response | Inflamed | GREM1     | protein_cc chr15 | 33010175 | 33026870 | + | 4168  | 4682.274 | 0.004773 | -1.70963 | 0.454648 | -3.76033 | 0.000287 | 0.002697 | 1 |
| ENSG0000 response | Inflamed | ROBO1     | protein_cc chr3  | 78646390 | 79816965 | - | 10862 | 1648.952 | 0        | -0.81316 | 0.216251 | -3.76029 | 0.000287 | 0.002697 | 1 |
| ENSG0000 response | Inflamed | RP11-214C | lincRNA chr17    | 14207171 | 14208822 | + | 1652  | 28.96181 | 0.031026 | -0.68631 | 0.182534 | -3.75991 | 0.000288 | 0.0027   | 1 |
| ENSG0000 response | Inflamed | MIR200B   | miRNA chr1       | 1102484  | 1102578  | + | 95    | 13.68735 | 0.081146 | 0.744011 | 0.197913 | 3.759285 | 0.000288 | 0.002704 | 1 |
| ENSG0000 response | Inflamed | DNAH2     | protein_cc chr17 | 7620672  | 7737062  | + | 17231 | 95.73508 | 0.002387 | -0.70847 | 0.188464 | -3.75915 | 0.000288 | 0.002704 | 1 |
| ENSG0000 response | Inflamed | SMIM1     | protein_cc chr1  | 3689352  | 3692546  | + | 954   | 20.358   | 0.011933 | -0.75413 | 0.200611 | -3.75914 | 0.000289 | 0.002704 | 1 |
| ENSG0000 response | Inflamed | RP11-47L3 | lincRNA chr17    | 33640521 | 33651919 | + | 714   | 16.04057 | 0.009547 | -0.5138  | 0.136706 | -3.75847 | 0.000289 | 0.002709 | 1 |
| ENSG0000 response | Inflamed | SKAP1     | protein_cc chr17 | 46210802 | 46507637 | - | 2648  | 237.0239 | 0        | -0.47258 | 0.125744 | -3.75829 | 0.000289 | 0.002709 | 1 |
| ENSG0000 response | Inflamed | RP11-768E | antisense chr4   | 1.54E+08 | 1.54E+08 | + | 2371  | 11.06921 | 0.114558 | -0.8505  | 0.2263   | -3.75828 | 0.000289 | 0.002709 | 1 |
| ENSG0000 response | Inflamed | CFI       | protein_cc chr4  | 1.11E+08 | 1.11E+08 | - | 3873  | 861.7327 | 0        | -1.04194 | 0.277283 | -3.75769 | 0.00029  | 0.002714 | 1 |
| ENSG0000 response | Inflamed | HABP4     | protein_cc chr9  | 99212483 | 99253618 | + | 4056  | 313.0095 | 0        | -0.45913 | 0.122192 | -3.75745 | 0.00029  | 0.002715 | 1 |
| ENSG0000 response | Inflamed | TSPAN32   | protein_cc chr11 | 2323227  | 2339430  | + | 3793  | 82.89976 | 0.002387 | -0.76498 | 0.203649 | -3.75634 | 0.000291 | 0.002725 | 1 |
| ENSG0000 response | Inflamed | RP5-894D  | lincRNA chr6     | 1.71E+08 | 1.71E+08 | - | 1953  | 5.312649 | 0.145585 | 0.557424 | 0.1484   | 3.756228 | 0.000291 | 0.002725 | 1 |
| ENSG0000 response | Inflamed | LINC00511 | lincRNA chr17    | 70319264 | 70636611 | - | 8615  | 726.6253 | 0        | 0.476245 | 0.126792 | 3.756129 | 0.000292 | 0.002725 | 1 |
| ENSG0000 response | Inflamed | RP11-380M | pseudoger chr18  | 45379604 | 45379828 | - | 225   | 168.2315 | 0        | 0.634087 | 0.168836 | 3.755645 | 0.000292 | 0.002729 | 1 |
| ENSG0000 response | Inflamed | MYL5      | protein_cc chr4  | 667369   | 675822   | + | 4305  | 362.1337 | 0        | 0.415781 | 0.110733 | 3.754798 | 0.000293 | 0.002735 | 1 |
| ENSG0000 response | Inflamed | CYP26B1   | protein_cc chr2  | 72356367 | 72375167 | - | 5015  | 866.8282 | 0.004773 | -1.41324 | 0.376388 | -3.75474 | 0.000293 | 0.002735 | 1 |
| ENSG0000 response | Inflamed | BCL6B     | protein_cc chr17 | 6926339  | 6933609  | + | 4373  | 500.2792 | 0        | -0.77387 | 0.206108 | -3.75466 | 0.000293 | 0.002735 | 1 |
| ENSG0000 response | Inflamed | GUCY1A3   | protein_cc chr4  | 1.57E+08 | 1.57E+08 | + | 5766  | 440.6492 | 0        | -1.05066 | 0.279856 | -3.75427 | 0.000293 | 0.002738 | 1 |
| ENSG0000 response | Inflamed | RP4-753P  | 3prime_ov chrX   | 1.29E+08 | 1.29E+08 | + | 326   | 9.031026 | 0.171838 | -0.68445 | 0.182356 | -3.75338 | 0.000294 | 0.002745 | 1 |
| ENSG0000 response | Inflamed | HAL       | protein_cc chr12 | 96366440 | 96390143 | - | 5146  | 57.28878 | 0.016706 | -0.98603 | 0.262761 | -3.75257 | 0.000295 | 0.002752 | 1 |
| ENSG0000 response | Inflamed | GJB1      | protein_cc chrX  | 70435044 | 70445366 | + | 2235  | 1964.148 | 0.004773 | 0.853915 | 0.227598 | 3.751855 | 0.000296 | 0.002758 | 1 |
| ENSG0000 response | Inflamed | C12orf55  | protein_cc chr12 | 96883349 | 97269333 | + | 12719 | 40.63484 | 0.009547 | -0.90792 | 0.242046 | -3.75102 | 0.000297 | 0.002765 | 1 |
| ENSG0000 response | Inflamed | TACC2     | protein_cc chr10 | 1.24E+08 | 1.24E+08 | + | 18835 | 4073.998 | 0        | 0.540895 | 0.144208 | 3.75079  | 0.000297 | 0.002766 | 1 |
| ENSG0000 response | Inflamed | HOXB6     | protein_cc chr17 | 46671639 | 46682354 | - | 4078  | 2064.193 | 0        | 0.675262 | 0.180041 | 3.750599 | 0.000297 | 0.002767 | 1 |
| ENSG0000 response | Inflamed | KCNMB2    | protein_cc chr3  | 1.78E+08 | 1.79E+08 | + | 3585  | 7.684964 | 0.150358 | 0.72071  | 0.192174 | 3.750292 | 0.000298 | 0.002769 | 1 |
| ENSG0000 response | Inflamed | RP11-175I | antisense chr9   | 1.28E+08 | 1.28E+08 | + | 617   | 2.083532 | 0.51074  | 0.398097 | 0.106169 | 3.74967  | 0.000298 | 0.002774 | 1 |
| ENSG0000 response | Inflamed | PRKCZ     | protein_cc chr1  | 1981909  | 2116834  | + | 7636  | 1684.408 | 0        | 0.363297 | 0.096904 | 3.74903  | 0.000299 | 0.002779 | 1 |
| ENSG0000 response | Inflamed | KCND2     | protein_cc chr7  | 1.2E+08  | 1.2E+08  | + | 5555  | 3.460621 | 0.630072 | -0.83705 | 0.223303 | -3.7485  | 0.000299 | 0.002781 | 1 |
| ENSG0000 response | Inflamed | ASAP1     | protein_cc chr8  | 1.31E+08 | 1.31E+08 | - | 8278  | 1545.379 | 0        | -0.66536 | 0.177503 | -3.74846 | 0.000299 | 0.002781 | 1 |
| ENSG0000 response | Inflamed | IGHV3-20  | IG_V_gene chr14  | 1.07E+08 | 1.07E+08 | - | 413   | 998.5036 | 0.002387 | -1.37927 | 0.367959 | -3.74844 | 0.000299 | 0.002781 | 1 |
| ENSG0000 response | Inflamed | RP11-13K1 | lincRNA chr17    | 75543022 | 75559325 | + | 5079  | 52.59427 | 0.0358   | 1.134257 | 0.302599 | 3.748387 | 0.0003   | 0.002781 | 1 |
| ENSG0000 response | Inflamed | MCTP1     | protein_cc chr5  | 94039446 | 94620279 | - | 12089 | 269.4057 | 0        | -0.74868 | 0.199735 | -3.74836 | 0.0003   | 0.002781 | 1 |
| ENSG0000 response | Inflamed | APOC2     | protein_cc chr19 | 45449243 | 45452822 | + | 1312  | 20.6611  | 0.040573 | -0.67056 | 0.178935 | -3.74751 | 0.0003   | 0.002787 | 1 |



|                   |          |           |                  |          |          |   |       |          |          |          |          |          |          |          |   |
|-------------------|----------|-----------|------------------|----------|----------|---|-------|----------|----------|----------|----------|----------|----------|----------|---|
| ENSG0000 response | Inflamed | RUNX2     | protein_cc chr6  | 45295894 | 45632086 | + | 8191  | 671.864  | 0        | -0.6779  | 0.180896 | -3.74744 | 0.000301 | 0.002787 | 1 |
| ENSG0000 response | Inflamed | CXCR3     | protein_cc chrX  | 70835766 | 70838367 | - | 1868  | 341.9857 | 0        | -0.48585 | 0.129649 | -3.74742 | 0.000301 | 0.002787 | 1 |
| ENSG0000 response | Inflamed | FAM171A1  | protein_cc chr10 | 15253642 | 15413061 | - | 3955  | 3249.477 | 0        | 0.407129 | 0.108648 | 3.747233 | 0.000301 | 0.002787 | 1 |
| ENSG0000 response | Inflamed | STEAP1B   | protein_cc chr7  | 22459063 | 22672544 | - | 2316  | 11.54415 | 0.047733 | -0.71999 | 0.192139 | -3.74721 | 0.000301 | 0.002787 | 1 |
| ENSG0000 response | Inflamed | RP11-395F | antisense chr9   | 1.31E+08 | 1.31E+08 | - | 3958  | 2029.757 | 0        | 0.633398 | 0.169049 | 3.746821 | 0.000301 | 0.002789 | 1 |
| ENSG0000 response | Inflamed | LOX       | protein_cc chr5  | 1.21E+08 | 1.21E+08 | - | 5468  | 565.315  | 0        | -0.70362 | 0.187795 | -3.74676 | 0.000301 | 0.002789 | 1 |
| ENSG0000 response | Inflamed | 01-Sep    | protein_cc chr16 | 30389454 | 30407312 | - | 4217  | 459.0907 | 0        | -0.6461  | 0.172443 | -3.74674 | 0.000301 | 0.002789 | 1 |
| ENSG0000 response | Inflamed | HECW1     | protein_cc chr7  | 43152198 | 43605600 | + | 13965 | 28.51074 | 0.016706 | -0.73958 | 0.197398 | -3.74664 | 0.000301 | 0.002789 | 1 |
| ENSG0000 response | Inflamed | FUT8      | protein_cc chr14 | 65877310 | 66210839 | + | 6889  | 1356.396 | 0        | -0.59222 | 0.158075 | -3.74645 | 0.000302 | 0.00279  | 1 |
| ENSG0000 response | Inflamed | RP13-452I | processed_chr7   | 1.52E+08 | 1.52E+08 | + | 2222  | 8.9642   | 0.224344 | -0.85875 | 0.229252 | -3.74588 | 0.000302 | 0.002794 | 1 |
| ENSG0000 response | Inflamed | GPR116    | protein_cc chr6  | 46820249 | 46922680 | - | 6717  | 994.3604 | 0.002387 | -0.93516 | 0.249652 | -3.74584 | 0.000302 | 0.002794 | 1 |
| ENSG0000 response | Inflamed | LINC0084C | lincRNA chr10    | 44354859 | 44390881 | + | 1974  | 4.207637 | 0.362768 | -0.6405  | 0.170998 | -3.74567 | 0.000302 | 0.002794 | 1 |
| ENSG0000 response | Inflamed | SLC7A11   | protein_cc chr4  | 1.39E+08 | 1.39E+08 | - | 9645  | 414.6754 | 0        | -1.00806 | 0.269137 | -3.74554 | 0.000303 | 0.002795 | 1 |
| ENSG0000 response | Inflamed | PGLYRP2   | protein_cc chr19 | 15579456 | 15609767 | - | 3188  | 8.539379 | 0.095465 | -0.68553 | 0.18304  | -3.74522 | 0.000303 | 0.002797 | 1 |
| ENSG0000 response | Inflamed | AC005256  | lincRNA chr19    | 1748055  | 1748744  | + | 458   | 1.878282 | 0.682578 | -0.62344 | 0.16652  | -3.74393 | 0.000304 | 0.002808 | 1 |
| ENSG0000 response | Inflamed | PXDN      | protein_cc chr2  | 1635659  | 1748624  | - | 11257 | 5075.432 | 0        | -0.73347 | 0.195983 | -3.74254 | 0.000306 | 0.002821 | 1 |
| ENSG0000 response | Inflamed | MSTO1     | protein_cc chr1  | 1.56E+08 | 1.56E+08 | + | 5359  | 489.2697 | 0        | -0.36535 | 0.097626 | -3.7424  | 0.000306 | 0.002821 | 1 |
| ENSG0000 response | Inflamed | AC004466  | protein_cc chr12 | 48178706 | 48179787 | + | 1082  | 27.76372 | 0.009547 | 0.495887 | 0.132523 | 3.741878 | 0.000306 | 0.002826 | 1 |
| ENSG0000 response | Inflamed | RAB3C     | protein_cc chr5  | 57878048 | 58155213 | + | 9648  | 65.60143 | 0.002387 | -0.66184 | 0.176902 | -3.74127 | 0.000307 | 0.002831 | 1 |
| ENSG0000 response | Inflamed | ANKRD36E  | pseudoger chr2   | 89065324 | 89106126 | + | 8039  | 1058.599 | 0        | -1.24629 | 0.333136 | -3.74107 | 0.000307 | 0.002832 | 1 |
| ENSG0000 response | Inflamed | S100A4    | protein_cc chr1  | 1.54E+08 | 1.54E+08 | - | 1025  | 1810.554 | 0        | -0.70991 | 0.189791 | -3.74048 | 0.000308 | 0.002836 | 1 |
| ENSG0000 response | Inflamed | FCRLA     | protein_cc chr1  | 1.62E+08 | 1.62E+08 | + | 3275  | 334.8831 | 0.002387 | -1.0678  | 0.285478 | -3.74037 | 0.000308 | 0.002836 | 1 |
| ENSG0000 response | Inflamed | SPINT2    | protein_cc chr19 | 38734675 | 38783254 | + | 5199  | 14853.7  | 0        | 0.48713  | 0.130263 | 3.739605 | 0.000309 | 0.002843 | 1 |
| ENSG0000 response | Inflamed | LMX1A     | protein_cc chr1  | 1.65E+08 | 1.65E+08 | - | 4185  | 25.10263 | 0.083532 | 0.979912 | 0.262067 | 3.739162 | 0.000309 | 0.002846 | 1 |
| ENSG0000 response | Inflamed | DDO       | protein_cc chr6  | 1.11E+08 | 1.11E+08 | - | 2130  | 60.52029 | 0        | 0.599528 | 0.160354 | 3.738782 | 0.00031  | 0.002849 | 1 |
| ENSG0000 response | Inflamed | UBE2QL1   | protein_cc chr5  | 6448736  | 6495022  | + | 4317  | 75.54177 | 0.009547 | -0.66187 | 0.177029 | -3.73874 | 0.00031  | 0.002849 | 1 |
| ENSG0000 response | Inflamed | CLU       | protein_cc chr8  | 27454434 | 27472548 | - | 6616  | 5963.523 | 0        | -0.92851 | 0.248366 | -3.73847 | 0.00031  | 0.00285  | 1 |
| ENSG0000 response | Inflamed | LOXL1     | protein_cc chr15 | 74218330 | 74244478 | + | 3637  | 927.7327 | 0        | -0.8337  | 0.22301  | -3.73837 | 0.00031  | 0.00285  | 1 |
| ENSG0000 response | Inflamed | CANT1     | protein_cc chr17 | 76987799 | 77005949 | - | 4414  | 15847.94 | 0        | 0.389351 | 0.104151 | 3.738331 | 0.00031  | 0.00285  | 1 |
| ENSG0000 response | Inflamed | SNX29     | protein_cc chr16 | 12070594 | 12668146 | + | 11298 | 1460.494 | 0        | -0.48487 | 0.129725 | -3.73771 | 0.000311 | 0.002855 | 1 |
| ENSG0000 response | Inflamed | CAPN9     | protein_cc chr1  | 2.31E+08 | 2.31E+08 | + | 2593  | 1232.888 | 0        | 1.028109 | 0.275119 | 3.736963 | 0.000312 | 0.002861 | 1 |
| ENSG0000 response | Inflamed | RP5-1139E | antisense chr1   | 2.28E+08 | 2.28E+08 | - | 3955  | 29.39857 | 0.026253 | -0.74797 | 0.200169 | -3.73668 | 0.000312 | 0.002863 | 1 |
| ENSG0000 response | Inflamed | PIF1      | protein_cc chr15 | 65107831 | 65117867 | - | 4656  | 323.5561 | 0        | -0.61139 | 0.163631 | -3.73637 | 0.000312 | 0.002865 | 1 |
| ENSG0000 response | Inflamed | DDIT4L    | protein_cc chr4  | 1.01E+08 | 1.01E+08 | - | 2994  | 19.73031 | 0.026253 | -0.78376 | 0.209792 | -3.73587 | 0.000313 | 0.002869 | 1 |
| ENSG0000 response | Inflamed | EVPLL     | protein_cc chr17 | 18280976 | 18292961 | + | 2156  | 10.31265 | 0.138425 | 0.71481  | 0.191352 | 3.735587 | 0.000313 | 0.002871 | 1 |
| ENSG0000 response | Inflamed | MEF2C     | protein_cc chr5  | 88013975 | 88199922 | - | 9053  | 854.7733 | 0        | -0.81209 | 0.217429 | -3.73498 | 0.000314 | 0.002876 | 1 |
| ENSG0000 response | Inflamed | PTPN1     | protein_cc chr20 | 49126891 | 49201299 | + | 3529  | 3943.305 | 0        | -0.41159 | 0.110204 | -3.7348  | 0.000314 | 0.002876 | 1 |
| ENSG0000 response | Inflamed | STMND1    | protein_cc chr6  | 17102489 | 17131603 | + | 2882  | 14.358   | 0.224344 | 0.887477 | 0.237624 | 3.734789 | 0.000314 | 0.002876 | 1 |
| ENSG0000 response | Inflamed | FAM160A1  | protein_cc chr4  | 1.52E+08 | 1.53E+08 | + | 4932  | 555.3771 | 0        | 0.791209 | 0.21189  | 3.734053 | 0.000315 | 0.002882 | 1 |
| ENSG0000 response | Inflamed | LGALS1    | protein_cc chr22 | 38071615 | 38075813 | + | 1099  | 3500.754 | 0        | -0.71458 | 0.191371 | -3.73402 | 0.000315 | 0.002882 | 1 |

|                   |          |                     |                  |          |          |   |       |          |          |          |          |          |          |          |   |
|-------------------|----------|---------------------|------------------|----------|----------|---|-------|----------|----------|----------|----------|----------|----------|----------|---|
| ENSG0000 response | Inflamed | RP11-542k antisense | chr9             | 1.25E+08 | 1.25E+08 | + | 259   | 2.582339 | 0.548926 | -0.62716 | 0.167976 | -3.73365 | 0.000315 | 0.002884 | 1 |
| ENSG0000 response | Inflamed | CMTM8               | protein_cc chr3  | 32280171 | 32411817 | + | 1174  | 269.5179 | 0        | 0.346705 | 0.09287  | 3.733225 | 0.000316 | 0.002888 | 1 |
| ENSG0000 response | Inflamed | SMAGP               | protein_cc chr12 | 51638342 | 51664674 | - | 3558  | 2377.733 | 0        | 0.415738 | 0.111371 | 3.732914 | 0.000316 | 0.002889 | 1 |
| ENSG0000 response | Inflamed | TIMD4               | protein_cc chr5  | 1.56E+08 | 1.56E+08 | - | 1555  | 48.64916 | 0.0358   | -1.11324 | 0.298227 | -3.73286 | 0.000316 | 0.002889 | 1 |
| ENSG0000 response | Inflamed | KCNH6               | protein_cc chr17 | 61600695 | 61626338 | + | 4211  | 42.87112 | 0.019093 | 0.845848 | 0.226655 | 3.731882 | 0.000317 | 0.002897 | 1 |
| ENSG0000 response | Inflamed | CYP2E1              | protein_cc chr10 | 1.35E+08 | 1.35E+08 | + | 9621  | 41.04296 | 0.002387 | -0.67437 | 0.180707 | -3.73185 | 0.000317 | 0.002897 | 1 |
| ENSG0000 response | Inflamed | NAMA                | lincRNA chr9     | 1.02E+08 | 1.02E+08 | - | 5073  | 1.260143 | 0.76611  | -0.49711 | 0.133209 | -3.73182 | 0.000317 | 0.002897 | 1 |
| ENSG0000 response | Inflamed | XXbac-B13           | lincRNA chr22    | 21311380 | 21318967 | + | 684   | 112.9642 | 0        | 0.584034 | 0.156538 | 3.730933 | 0.000318 | 0.002904 | 1 |
| ENSG0000 response | Inflamed | WDR64               | protein_cc chr1  | 2.42E+08 | 2.42E+08 | + | 4935  | 4.553699 | 0.252983 | -0.6473  | 0.173498 | -3.7309  | 0.000318 | 0.002904 | 1 |
| ENSG0000 response | Inflamed | NEUROD1             | protein_cc chr2  | 1.83E+08 | 1.83E+08 | - | 3312  | 55.35561 | 0.073986 | 1.192038 | 0.319515 | 3.730771 | 0.000318 | 0.002904 | 1 |
| ENSG0000 response | Inflamed | MT1A                | protein_cc chr16 | 56672578 | 56673999 | + | 396   | 29.65632 | 0.02148  | 0.816468 | 0.21887  | 3.730374 | 0.000319 | 0.002907 | 1 |
| ENSG0000 response | Inflamed | AC017002            | lincRNA chr2     | 1.12E+08 | 1.12E+08 | - | 881   | 2.98568  | 0.458234 | -0.6039  | 0.161958 | -3.72874 | 0.000321 | 0.002923 | 1 |
| ENSG0000 response | Inflamed | MT1M                | protein_cc chr16 | 56666145 | 56667898 | + | 942   | 360.1814 | 0.004773 | 1.181123 | 0.316781 | 3.728518 | 0.000321 | 0.002924 | 1 |
| ENSG0000 response | Inflamed | FMO2                | protein_cc chr1  | 1.71E+08 | 1.71E+08 | + | 6239  | 17.35561 | 0.157518 | -1.06008 | 0.284381 | -3.72767 | 0.000322 | 0.002932 | 1 |
| ENSG0000 response | Inflamed | RP11-389C           | sense_ove chr5   | 71735730 | 71738214 | - | 2485  | 197.2936 | 0.002387 | -0.65049 | 0.174528 | -3.72711 | 0.000323 | 0.002936 | 1 |
| ENSG0000 response | Inflamed | CERS6               | protein_cc chr2  | 1.69E+08 | 1.7E+08  | + | 7238  | 3335.174 | 0        | 0.679878 | 0.182451 | 3.726356 | 0.000323 | 0.002943 | 1 |
| ENSG0000 response | Inflamed | NYAP2               | protein_cc chr2  | 2.26E+08 | 2.27E+08 | + | 4832  | 4.675418 | 0.379475 | -0.79316 | 0.212868 | -3.72608 | 0.000324 | 0.002945 | 1 |
| ENSG0000 response | Inflamed | SPATA2              | protein_cc chr20 | 48519928 | 48532080 | - | 4305  | 1618.573 | 0        | 0.364115 | 0.097743 | 3.725235 | 0.000325 | 0.002951 | 1 |
| ENSG0000 response | Inflamed | P2RY10              | protein_cc chrX  | 78200829 | 78217451 | + | 1803  | 152.747  | 0.002387 | -0.84555 | 0.226981 | -3.72519 | 0.000325 | 0.002951 | 1 |
| ENSG0000 response | Inflamed | SIRPG               | protein_cc chr20 | 1609798  | 1638425  | - | 2242  | 238.5967 | 0        | -0.63329 | 0.170004 | -3.72516 | 0.000325 | 0.002951 | 1 |
| ENSG0000 response | Inflamed | MED12L              | protein_cc chr3  | 1.51E+08 | 1.51E+08 | + | 12619 | 18.98091 | 0.069212 | -0.79896 | 0.214508 | -3.7246  | 0.000325 | 0.002955 | 1 |
| ENSG0000 response | Inflamed | ATPIF1              | protein_cc chr1  | 28562620 | 28573417 | + | 2225  | 3764.64  | 0        | 0.293788 | 0.078878 | 3.724596 | 0.000325 | 0.002955 | 1 |
| ENSG0000 response | Inflamed | RP4-725G            | pseudoger chr7   | 56230838 | 56231226 | + | 389   | 2.909308 | 0.369928 | -0.52804 | 0.141777 | -3.72443 | 0.000326 | 0.002956 | 1 |
| ENSG0000 response | Inflamed | CTD-2536I           | lincRNA chr15    | 95819690 | 95870358 | - | 2343  | 16.83294 | 0.050119 | -0.7611  | 0.204371 | -3.72411 | 0.000326 | 0.002958 | 1 |
| ENSG0000 response | Inflamed | PABPC4              | protein_cc chr1  | 40026488 | 40042462 | - | 6782  | 5242.162 | 0        | -0.28322 | 0.076054 | -3.72398 | 0.000326 | 0.002958 | 1 |
| ENSG0000 response | Inflamed | SERINC2             | protein_cc chr1  | 31882412 | 31907525 | + | 3520  | 13701.91 | 0        | 0.578292 | 0.155291 | 3.723934 | 0.000326 | 0.002958 | 1 |
| ENSG0000 response | Inflamed | RP11-867C           | protein_cc chr11 | 66115421 | 66132275 | + | 1540  | 264.8592 | 0        | 0.485333 | 0.130339 | 3.723609 | 0.000327 | 0.00296  | 1 |
| ENSG0000 response | Inflamed | PI4K2A              | protein_cc chr10 | 99344131 | 99436191 | + | 4864  | 1004.535 | 0        | -0.26176 | 0.070301 | -3.72336 | 0.000327 | 0.002962 | 1 |
| ENSG0000 response | Inflamed | SLC25A10            | protein_cc chr17 | 79670404 | 79688042 | + | 3287  | 673.21   | 0        | 0.440092 | 0.118203 | 3.723186 | 0.000327 | 0.002962 | 1 |
| ENSG0000 response | Inflamed | ZNF512B             | protein_cc chr20 | 62588055 | 62680113 | - | 6018  | 721.926  | 0        | -0.63821 | 0.171434 | -3.72275 | 0.000328 | 0.002966 | 1 |
| ENSG0000 response | Inflamed | RAB13               | protein_cc chr1  | 1.54E+08 | 1.54E+08 | - | 2713  | 1852.153 | 0        | -0.38722 | 0.104019 | -3.72259 | 0.000328 | 0.002967 | 1 |
| ENSG0000 response | Inflamed | CD99L2              | protein_cc chrX  | 1.5E+08  | 1.5E+08  | - | 5732  | 1569.962 | 0        | -0.42487 | 0.11416  | -3.7217  | 0.000329 | 0.002975 | 1 |
| ENSG0000 response | Inflamed | DECR2               | protein_cc chr16 | 451826   | 462487   | + | 3947  | 960.5513 | 0        | 0.391883 | 0.105311 | 3.721211 | 0.000329 | 0.002978 | 1 |
| ENSG0000 response | Inflamed | CPZ                 | protein_cc chr4  | 8594387  | 8621488  | + | 5562  | 32.70883 | 0.073986 | -0.93242 | 0.25057  | -3.72119 | 0.000329 | 0.002978 | 1 |
| ENSG0000 response | Inflamed | CCBL1               | protein_cc chr9  | 1.32E+08 | 1.32E+08 | - | 3602  | 123.4415 | 0        | -0.38569 | 0.103652 | -3.721   | 0.000329 | 0.002979 | 1 |
| ENSG0000 response | Inflamed | MYCL                | protein_cc chr1  | 40361098 | 40367928 | - | 5065  | 863.7112 | 0        | 0.447771 | 0.120358 | 3.720341 | 0.00033  | 0.002984 | 1 |
| ENSG0000 response | Inflamed | ENPP7P11            | pseudoger chr4   | 9678932  | 9679558  | + | 627   | 65.11933 | 0.02864  | 1.177121 | 0.316405 | 3.720304 | 0.00033  | 0.002984 | 1 |
| ENSG0000 response | Inflamed | CDH11               | protein_cc chr16 | 64977656 | 65160015 | - | 9920  | 1930.94  | 0        | -0.76335 | 0.205201 | -3.72    | 0.000331 | 0.002986 | 1 |
| ENSG0000 response | Inflamed | PPT1                | protein_cc chr1  | 40538379 | 40563375 | - | 3304  | 2280.064 | 0        | -0.48044 | 0.129164 | -3.71962 | 0.000331 | 0.002989 | 1 |
| ENSG0000 response | Inflamed | ORAI1               | protein_cc chr12 | 1.22E+08 | 1.22E+08 | + | 2263  | 995.1193 | 0        | -0.34898 | 0.093832 | -3.71925 | 0.000331 | 0.002992 | 1 |

|                   |          |           |                  |          |          |   |       |          |          |          |          |          |          |          |   |
|-------------------|----------|-----------|------------------|----------|----------|---|-------|----------|----------|----------|----------|----------|----------|----------|---|
| ENSG0000 response | Inflamed | GLRA2     | protein_cc chrX  | 14547420 | 14749934 | + | 3713  | 33.30549 | 0.188544 | 1.418325 | 0.381421 | 3.718532 | 0.000332 | 0.002998 | 1 |
| ENSG0000 response | Inflamed | DNMBP-A5  | antisense chr10  | 1.02E+08 | 1.02E+08 | + | 2336  | 37.42721 | 0.01432  | 0.737983 | 0.198469 | 3.718381 | 0.000333 | 0.002999 | 1 |
| ENSG0000 response | Inflamed | PLCE1     | protein_cc chr10 | 95753746 | 96092580 | + | 13282 | 2756.024 | 0        | 0.781247 | 0.210138 | 3.717786 | 0.000333 | 0.003003 | 1 |
| ENSG0000 response | Inflamed | HLA-DOA   | protein_cc chr6  | 32971955 | 32977389 | - | 4012  | 2056.351 | 0        | -0.54498 | 0.14659  | -3.71773 | 0.000333 | 0.003003 | 1 |
| ENSG0000 response | Inflamed | KCNB2     | protein_cc chr8  | 73449626 | 73850584 | + | 3582  | 4.883055 | 0.236277 | 0.647425 | 0.174147 | 3.717689 | 0.000333 | 0.003003 | 1 |
| ENSG0000 response | Inflamed | RP11-384L | sense_intr chr3  | 32278180 | 32280070 | - | 1891  | 73.43675 | 0.004773 | 0.626622 | 0.16859  | 3.716827 | 0.000334 | 0.003011 | 1 |
| ENSG0000 response | Inflamed | SLC25A5   | protein_cc chrX  | 1.19E+08 | 1.19E+08 | + | 1500  | 17561.98 | 0        | 0.399786 | 0.107569 | 3.716568 | 0.000335 | 0.003011 | 1 |
| ENSG0000 response | Inflamed | RP11-1149 | lincRNA chr8     | 82066514 | 82076834 | + | 1136  | 8.164678 | 0.066826 | -0.64414 | 0.173316 | -3.71654 | 0.000335 | 0.003011 | 1 |
| ENSG0000 response | Inflamed | RAB38     | protein_cc chr11 | 87846410 | 87908635 | - | 1465  | 63.82339 | 0        | -0.62145 | 0.167216 | -3.71647 | 0.000335 | 0.003011 | 1 |
| ENSG0000 response | Inflamed | RP11-8091 | antisense chr11  | 73116342 | 73121727 | + | 344   | 9.28401  | 0.174224 | -0.81353 | 0.218905 | -3.71639 | 0.000335 | 0.003011 | 1 |
| ENSG0000 response | Inflamed | EPHX4     | protein_cc chr1  | 92495539 | 92529093 | + | 2251  | 28.05251 | 0.019093 | -0.81604 | 0.219632 | -3.71547 | 0.000336 | 0.00302  | 1 |
| ENSG0000 response | Inflamed | FZD2      | protein_cc chr17 | 42634925 | 42636907 | + | 1983  | 187.3389 | 0        | -0.60265 | 0.16224  | -3.71457 | 0.000337 | 0.003028 | 1 |
| ENSG0000 response | Inflamed | FBN1      | protein_cc chr15 | 48700503 | 48938046 | - | 16057 | 4076.678 | 0        | -0.79292 | 0.213521 | -3.71352 | 0.000338 | 0.003038 | 1 |
| ENSG0000 response | Inflamed | SYTL2     | protein_cc chr11 | 85405267 | 85522184 | - | 11248 | 3512.611 | 0        | 0.834622 | 0.224787 | 3.712944 | 0.000339 | 0.003043 | 1 |
| ENSG0000 response | Inflamed | PLXNA1    | protein_cc chr3  | 1.27E+08 | 1.27E+08 | + | 10944 | 3696.902 | 0        | -0.53135 | 0.143109 | -3.71287 | 0.000339 | 0.003043 | 1 |
| ENSG0000 response | Inflamed | CALU      | protein_cc chr7  | 1.28E+08 | 1.28E+08 | + | 4537  | 4321.033 | 0        | -0.59149 | 0.159311 | -3.71281 | 0.000339 | 0.003043 | 1 |
| ENSG0000 response | Inflamed | TMEM8B    | protein_cc chr9  | 35814448 | 35854844 | + | 5426  | 861.3126 | 0        | 0.45486  | 0.122526 | 3.712339 | 0.00034  | 0.003047 | 1 |
| ENSG0000 response | Inflamed | CD5       | protein_cc chr11 | 60869867 | 60895324 | + | 3221  | 677.0644 | 0        | -0.63155 | 0.170136 | -3.71202 | 0.00034  | 0.003049 | 1 |
| ENSG0000 response | Inflamed | ABCC6P2   | pseudoger chr16  | 14914649 | 14918563 | - | 1088  | 42.11456 | 0.011933 | 0.705639 | 0.190118 | 3.711584 | 0.00034  | 0.003053 | 1 |
| ENSG0000 response | Inflamed | SPOCK2    | protein_cc chr10 | 73818793 | 73848790 | - | 6572  | 3082.723 | 0        | -0.76419 | 0.205986 | -3.70993 | 0.000342 | 0.003069 | 1 |
| ENSG0000 response | Inflamed | FAM184B   | protein_cc chr4  | 17630929 | 17783135 | - | 6622  | 20.50597 | 0.26253  | 0.866832 | 0.233655 | 3.709876 | 0.000342 | 0.003069 | 1 |
| ENSG0000 response | Inflamed | LTF       | protein_cc chr3  | 46477136 | 46526724 | - | 4247  | 801.7924 | 0        | -1.25882 | 0.339396 | -3.70901 | 0.000343 | 0.003077 | 1 |
| ENSG0000 response | Inflamed | STAT2     | protein_cc chr12 | 56735381 | 56753939 | - | 6109  | 5523.337 | 0        | -0.49715 | 0.134092 | -3.70756 | 0.000345 | 0.003091 | 1 |
| ENSG0000 response | Inflamed | C2orf27A  | protein_cc chr2  | 1.32E+08 | 1.33E+08 | + | 2354  | 35.73747 | 0.02148  | -0.61583 | 0.166116 | -3.70723 | 0.000346 | 0.003094 | 1 |
| ENSG0000 response | Inflamed | NBPF1     | protein_cc chr1  | 16888814 | 16940057 | - | 12212 | 3064.723 | 0        | 0.618191 | 0.166794 | 3.706321 | 0.000347 | 0.003102 | 1 |
| ENSG0000 response | Inflamed | IL22RA1   | protein_cc chr1  | 24446261 | 24469611 | - | 2798  | 2502.317 | 0        | 0.813636 | 0.219537 | 3.706146 | 0.000347 | 0.003102 | 1 |
| ENSG0000 response | Inflamed | MYCT1     | protein_cc chr6  | 1.53E+08 | 1.53E+08 | + | 3030  | 135.0286 | 0        | -0.70187 | 0.189381 | -3.70615 | 0.000347 | 0.003102 | 1 |
| ENSG0000 response | Inflamed | SH3RF3    | protein_cc chr2  | 1.1E+08  | 1.1E+08  | + | 5801  | 745.5274 | 0        | -0.51627 | 0.139307 | -3.70603 | 0.000347 | 0.003102 | 1 |
| ENSG0000 response | Inflamed | ENPP7P8   | pseudoger chr11  | 71422786 | 71492229 | + | 1607  | 4.310263 | 0.319809 | 0.679924 | 0.183475 | 3.705816 | 0.000347 | 0.003104 | 1 |
| ENSG0000 response | Inflamed | SHROOM3   | protein_cc chr4  | 77356253 | 77704406 | + | 13159 | 9901.033 | 0        | 0.64342  | 0.173636 | 3.705573 | 0.000348 | 0.003104 | 1 |
| ENSG0000 response | Inflamed | LINC0089C | lincRNA chrX     | 1.11E+08 | 1.11E+08 | + | 4758  | 10.68496 | 0.212411 | -0.92803 | 0.250446 | -3.70552 | 0.000348 | 0.003104 | 1 |
| ENSG0000 response | Inflamed | ZCCHC24   | protein_cc chr10 | 81142081 | 81205383 | - | 5051  | 1726.265 | 0        | -0.66293 | 0.178905 | -3.70552 | 0.000348 | 0.003104 | 1 |
| ENSG0000 response | Inflamed | PAQR5     | protein_cc chr15 | 69591286 | 69700119 | + | 6209  | 1667.924 | 0        | 0.711024 | 0.191897 | 3.705247 | 0.000348 | 0.003105 | 1 |
| ENSG0000 response | Inflamed | SOX18     | protein_cc chr20 | 62679076 | 62680994 | - | 1723  | 723.3771 | 0        | -0.86276 | 0.232881 | -3.70474 | 0.000349 | 0.003109 | 1 |
| ENSG0000 response | Inflamed | ANKRD34E  | protein_cc chr5  | 79852574 | 79866307 | - | 4024  | 2.646778 | 0.591885 | -0.61487 | 0.165968 | -3.70474 | 0.000349 | 0.003109 | 1 |
| ENSG0000 response | Inflamed | SPRED3    | protein_cc chr19 | 38879061 | 38886881 | + | 2518  | 17.58234 | 0.066826 | -0.77687 | 0.209733 | -3.70409 | 0.000349 | 0.003114 | 1 |
| ENSG0000 response | Inflamed | ZP2       | protein_cc chr16 | 21208773 | 21225831 | - | 3451  | 2.770883 | 0.534606 | 0.45278  | 0.122244 | 3.703907 | 0.00035  | 0.003114 | 1 |
| ENSG0000 response | Inflamed | RP11-662I | antisense chr12  | 25102097 | 25113092 | + | 728   | 1.501193 | 0.778043 | -0.66445 | 0.179397 | -3.70381 | 0.00035  | 0.003114 | 1 |
| ENSG0000 response | Inflamed | SEMA4G    | protein_cc chr10 | 1.03E+08 | 1.03E+08 | + | 5253  | 6166.458 | 0        | 0.743043 | 0.200619 | 3.703758 | 0.00035  | 0.003114 | 1 |
| ENSG0000 response | Inflamed | PKDCC     | protein_cc chr2  | 42275160 | 42285668 | + | 3925  | 2307.37  | 0        | 0.53401  | 0.144183 | 3.703693 | 0.00035  | 0.003114 | 1 |

|                   |          |           |                  |          |          |   |       |          |          |          |          |          |          |          |   |
|-------------------|----------|-----------|------------------|----------|----------|---|-------|----------|----------|----------|----------|----------|----------|----------|---|
| ENSG0000 response | Inflamed | EFNA3     | protein_cc chr1  | 1.55E+08 | 1.55E+08 | + | 2098  | 303.5871 | 0        | 0.583639 | 0.157585 | 3.703648 | 0.00035  | 0.003114 | 1 |
| ENSG0000 response | Inflamed | HEG1      | protein_cc chr3  | 1.25E+08 | 1.25E+08 | - | 9925  | 3341.647 | 0        | -0.7159  | 0.193302 | -3.70354 | 0.00035  | 0.003114 | 1 |
| ENSG0000 response | Inflamed | GUCA1A    | protein_cc chr6  | 42123144 | 42147794 | + | 2317  | 1.138425 | 0.75179  | -0.47778 | 0.129014 | -3.70329 | 0.00035  | 0.003116 | 1 |
| ENSG0000 response | Inflamed | ECM1      | protein_cc chr1  | 1.5E+08  | 1.5E+08  | + | 3360  | 1966.866 | 0        | -0.59187 | 0.159847 | -3.70271 | 0.000351 | 0.003121 | 1 |
| ENSG0000 response | Inflamed | LINC00839 | lincRNA chr10    | 42970991 | 42990784 | + | 2337  | 56.57995 | 0.01432  | -0.83825 | 0.226407 | -3.70238 | 0.000351 | 0.003124 | 1 |
| ENSG0000 response | Inflamed | NAAA      | protein_cc chr4  | 76831809 | 76862204 | - | 5154  | 2428.831 | 0        | 0.510012 | 0.137764 | 3.702075 | 0.000352 | 0.003125 | 1 |
| ENSG0000 response | Inflamed | DOLPP1    | protein_cc chr9  | 1.32E+08 | 1.32E+08 | + | 2249  | 1551.854 | 0        | 0.348525 | 0.094144 | 3.70202  | 0.000352 | 0.003125 | 1 |
| ENSG0000 response | Inflamed | IGF2BP2   | protein_cc chr3  | 1.85E+08 | 1.86E+08 | - | 4735  | 1750.119 | 0        | 0.493167 | 0.133232 | 3.701575 | 0.000352 | 0.003129 | 1 |
| ENSG0000 response | Inflamed | KRT222    | protein_cc chr17 | 38785049 | 38821393 | - | 2502  | 1.443914 | 0.630072 | -0.42502 | 0.114828 | -3.70136 | 0.000353 | 0.00313  | 1 |
| ENSG0000 response | Inflamed | PLA2G10   | protein_cc chr16 | 14766405 | 14788526 | - | 1113  | 409.6874 | 0.004773 | 0.80414  | 0.217261 | 3.701254 | 0.000353 | 0.003131 | 1 |
| ENSG0000 response | Inflamed | DUSP2     | protein_cc chr2  | 96808905 | 96811179 | - | 1932  | 296.358  | 0        | -0.76875 | 0.207727 | -3.70076 | 0.000353 | 0.003135 | 1 |
| ENSG0000 response | Inflamed | RP11-672L | lincRNA chr18    | 813275   | 813757   | + | 483   | 9.217184 | 0.059666 | 0.569907 | 0.154004 | 3.700591 | 0.000354 | 0.003136 | 1 |
| ENSG0000 response | Inflamed | IGFBP3    | protein_cc chr7  | 45951949 | 45961473 | - | 4466  | 3020.582 | 0        | -0.57199 | 0.154574 | -3.70044 | 0.000354 | 0.003136 | 1 |
| ENSG0000 response | Inflamed | RP11-380I | antisense chr8   | 28107580 | 28196772 | - | 887   | 3.451074 | 0.319809 | -0.62746 | 0.169573 | -3.70022 | 0.000354 | 0.003136 | 1 |
| ENSG0000 response | Inflamed | DDAH1     | protein_cc chr1  | 85784164 | 86043933 | - | 5982  | 3939.172 | 0        | 0.52253  | 0.141218 | 3.700161 | 0.000354 | 0.003136 | 1 |
| ENSG0000 response | Inflamed | FAM72B    | protein_cc chr1  | 1.21E+08 | 1.21E+08 | + | 3012  | 38.14558 | 0.002387 | -0.52454 | 0.141762 | -3.70015 | 0.000354 | 0.003136 | 1 |
| ENSG0000 response | Inflamed | LARGE     | protein_cc chr22 | 33558212 | 34318829 | - | 10687 | 1897.072 | 0        | 0.384115 | 0.103813 | 3.700052 | 0.000354 | 0.003136 | 1 |
| ENSG0000 response | Inflamed | C17orf49  | protein_cc chr17 | 6917814  | 6920844  | + | 2628  | 260.6134 | 0        | -0.30418 | 0.082234 | -3.69894 | 0.000356 | 0.003147 | 1 |
| ENSG0000 response | Inflamed | IMPDH1P1  | pseudoger chr2   | 2.02E+08 | 2.02E+08 | - | 1542  | 11.68258 | 0.264916 | 0.902809 | 0.244094 | 3.69861  | 0.000356 | 0.00315  | 1 |
| ENSG0000 response | Inflamed | SCGN      | protein_cc chr6  | 25652464 | 25702011 | + | 1447  | 98.6969  | 0.011933 | 0.980067 | 0.265044 | 3.697747 | 0.000357 | 0.003157 | 1 |
| ENSG0000 response | Inflamed | ABLIM3    | protein_cc chr5  | 1.49E+08 | 1.49E+08 | + | 7216  | 749.0382 | 0        | -0.56797 | 0.1536   | -3.69772 | 0.000357 | 0.003157 | 1 |
| ENSG0000 response | Inflamed | RP11-44F1 | pseudoger chr16  | 53398894 | 53406995 | - | 4322  | 11.3222  | 0.147971 | -0.77864 | 0.210583 | -3.69753 | 0.000357 | 0.003158 | 1 |
| ENSG0000 response | Inflamed | LY9       | protein_cc chr1  | 1.61E+08 | 1.61E+08 | + | 9121  | 388.6301 | 0        | -0.73638 | 0.199161 | -3.69742 | 0.000358 | 0.003158 | 1 |
| ENSG0000 response | Inflamed | AC079602  | protein_cc chr12 | 1.21E+08 | 1.21E+08 | - | 2455  | 391.7327 | 0.009547 | 1.119835 | 0.302899 | 3.697062 | 0.000358 | 0.003161 | 1 |
| ENSG0000 response | Inflamed | CATSPER1  | protein_cc chr11 | 65784223 | 65793988 | - | 2687  | 9.988067 | 0.052506 | -0.6398  | 0.173087 | -3.69643 | 0.000359 | 0.003167 | 1 |
| ENSG0000 response | Inflamed | AC121251  | pseudoger chr3   | 23431152 | 23431400 | - | 249   | 4.73747  | 0.310263 | -0.71147 | 0.192521 | -3.69556 | 0.00036  | 0.003176 | 1 |
| ENSG0000 response | Inflamed | LCK       | protein_cc chr1  | 32716840 | 32751766 | + | 3337  | 916.7613 | 0        | -0.56735 | 0.153531 | -3.69536 | 0.00036  | 0.003177 | 1 |
| ENSG0000 response | Inflamed | GIMAP4    | protein_cc chr7  | 1.5E+08  | 1.5E+08  | + | 2191  | 805.864  | 0        | -0.66242 | 0.179328 | -3.69392 | 0.000362 | 0.003192 | 1 |
| ENSG0000 response | Inflamed | RP11-107k | lincRNA chr18    | 24002959 | 24006065 | + | 900   | 1.040573 | 0.727924 | -0.41491 | 0.112334 | -3.69354 | 0.000362 | 0.003195 | 1 |
| ENSG0000 response | Inflamed | WNT10B    | protein_cc chr12 | 49359123 | 49365546 | - | 2629  | 66.47733 | 0.009547 | -0.88117 | 0.238579 | -3.69339 | 0.000363 | 0.003195 | 1 |
| ENSG0000 response | Inflamed | TRPM5     | protein_cc chr11 | 2425745  | 2444275  | - | 3962  | 170.463  | 0.01432  | 0.986318 | 0.267056 | 3.693304 | 0.000363 | 0.003195 | 1 |
| ENSG0000 response | Inflamed | ZADH2     | protein_cc chr18 | 72907063 | 72921303 | - | 8157  | 1859.379 | 0        | 0.421842 | 0.114247 | 3.692361 | 0.000364 | 0.003205 | 1 |
| ENSG0000 response | Inflamed | RP11-627C | processed_chr11  | 1.34E+08 | 1.34E+08 | + | 8255  | 495.0692 | 0.00716  | 1.172462 | 0.317552 | 3.692187 | 0.000364 | 0.003205 | 1 |
| ENSG0000 response | Inflamed | VENTX     | protein_cc chr10 | 1.35E+08 | 1.35E+08 | + | 2911  | 56.39141 | 0.011933 | -0.70501 | 0.19096  | -3.6919  | 0.000364 | 0.003207 | 1 |
| ENSG0000 response | Inflamed | GDPD5     | protein_cc chr11 | 75145685 | 75236948 | - | 9867  | 389.0119 | 0        | -0.55223 | 0.149593 | -3.69153 | 0.000365 | 0.00321  | 1 |
| ENSG0000 response | Inflamed | RP11-327F | antisense chr16  | 50774821 | 50776726 | - | 640   | 12.29117 | 0.095465 | -0.70218 | 0.190216 | -3.69147 | 0.000365 | 0.00321  | 1 |
| ENSG0000 response | Inflamed | KIAA1522  | protein_cc chr1  | 33207486 | 33240571 | + | 5965  | 15168.93 | 0        | 0.548991 | 0.14873  | 3.691203 | 0.000365 | 0.003212 | 1 |
| ENSG0000 response | Inflamed | TLN2      | protein_cc chr15 | 62682725 | 63136830 | + | 16202 | 3527.637 | 0        | 0.514376 | 0.139359 | 3.691005 | 0.000366 | 0.003213 | 1 |
| ENSG0000 response | Inflamed | SHROOM1   | protein_cc chr5  | 1.32E+08 | 1.32E+08 | - | 4329  | 2657.449 | 0        | 0.480211 | 0.130116 | 3.690644 | 0.000366 | 0.003216 | 1 |
| ENSG0000 response | Inflamed | ICAM5     | protein_cc chr19 | 10400657 | 10407454 | + | 3906  | 47.2315  | 0.016706 | -0.68912 | 0.186724 | -3.69056 | 0.000366 | 0.003216 | 1 |

|                   |          |           |                  |          |          |   |       |          |          |          |          |          |          |          |   |
|-------------------|----------|-----------|------------------|----------|----------|---|-------|----------|----------|----------|----------|----------|----------|----------|---|
| ENSG0000 response | Inflamed | CAMSAP3   | protein_cc chr19 | 7660788  | 7683190  | + | 4845  | 2756.652 | 0        | 0.636728 | 0.172555 | 3.689996 | 0.000367 | 0.003221 | 1 |
| ENSG0000 response | Inflamed | PABPN1L   | protein_cc chr16 | 88928034 | 88933068 | - | 1387  | 1.890215 | 0.568019 | -0.4856  | 0.13162  | -3.68943 | 0.000368 | 0.003226 | 1 |
| ENSG0000 response | Inflamed | MKRN1     | protein_cc chr7  | 1.4E+08  | 1.4E+08  | - | 5869  | 6197.358 | 0        | 0.377346 | 0.102298 | 3.688694 | 0.000368 | 0.003233 | 1 |
| ENSG0000 response | Inflamed | GPRC5C    | protein_cc chr17 | 72420990 | 72447792 | + | 8005  | 2406.27  | 0        | 0.461407 | 0.125129 | 3.687458 | 0.00037  | 0.003245 | 1 |
| ENSG0000 response | Inflamed | ADCY1     | protein_cc chr7  | 45613739 | 45762715 | + | 13530 | 220.1623 | 0.004773 | -0.77    | 0.208816 | -3.68744 | 0.00037  | 0.003245 | 1 |
| ENSG0000 response | Inflamed | SLC16A11  | protein_cc chr17 | 6944949  | 6947242  | - | 2041  | 22.64916 | 0        | 0.558203 | 0.151386 | 3.687274 | 0.00037  | 0.003245 | 1 |
| ENSG0000 response | Inflamed | NOS3      | protein_cc chr7  | 1.51E+08 | 1.51E+08 | + | 5953  | 825.685  | 0        | -0.84045 | 0.227935 | -3.68723 | 0.00037  | 0.003245 | 1 |
| ENSG0000 response | Inflamed | C16orf96  | protein_cc chr16 | 4606491  | 4650715  | + | 3823  | 6.928401 | 0.097852 | -0.55608 | 0.15082  | -3.68704 | 0.000371 | 0.003246 | 1 |
| ENSG0000 response | Inflamed | KIRREL    | protein_cc chr1  | 1.58E+08 | 1.58E+08 | + | 7872  | 2254.928 | 0        | -0.68083 | 0.184665 | -3.68686 | 0.000371 | 0.003246 | 1 |
| ENSG0000 response | Inflamed | C19orf10  | protein_cc chr19 | 4641386  | 4670382  | - | 1678  | 3125.907 | 0        | -0.35104 | 0.095215 | -3.68685 | 0.000371 | 0.003246 | 1 |
| ENSG0000 response | Inflamed | SLC44A3   | protein_cc chr1  | 95285898 | 95360802 | + | 2869  | 1631.764 | 0        | 0.536105 | 0.14542  | 3.686585 | 0.000371 | 0.003248 | 1 |
| ENSG0000 response | Inflamed | KCNK13    | protein_cc chr14 | 90528109 | 90652201 | + | 2522  | 80.51074 | 0.004773 | -0.50488 | 0.136967 | -3.68614 | 0.000372 | 0.003252 | 1 |
| ENSG0000 response | Inflamed | AMACR     | protein_cc chr5  | 33986283 | 34008220 | - | 4845  | 264.0501 | 0        | 0.573237 | 0.155516 | 3.686028 | 0.000372 | 0.003252 | 1 |
| ENSG0000 response | Inflamed | LYVE1     | protein_cc chr11 | 10578513 | 10633236 | - | 3515  | 263.642  | 0.002387 | -0.95634 | 0.259458 | -3.68592 | 0.000372 | 0.003252 | 1 |
| ENSG0000 response | Inflamed | EFEMP2    | protein_cc chr11 | 65633912 | 65641063 | - | 5397  | 1376.797 | 0        | -0.59393 | 0.161137 | -3.68584 | 0.000372 | 0.003252 | 1 |
| ENSG0000 response | Inflamed | AKR7L     | polymorpt chr1   | 19592476 | 19600688 | - | 2768  | 275.0048 | 0        | 0.815069 | 0.221149 | 3.685615 | 0.000372 | 0.003254 | 1 |
| ENSG0000 response | Inflamed | RHOU      | protein_cc chr1  | 2.29E+08 | 2.29E+08 | + | 4372  | 1569.408 | 0        | 0.764502 | 0.207473 | 3.684833 | 0.000373 | 0.003261 | 1 |
| ENSG0000 response | Inflamed | TSPAN9    | protein_cc chr12 | 3186521  | 3395730  | + | 5714  | 1525.334 | 0        | -0.57346 | 0.155626 | -3.68483 | 0.000373 | 0.003261 | 1 |
| ENSG0000 response | Inflamed | HSPA8P4   | pseudoger chr5   | 1.29E+08 | 1.29E+08 | + | 1920  | 2.054893 | 0.505967 | -0.45297 | 0.122944 | -3.68436 | 0.000374 | 0.003265 | 1 |
| ENSG0000 response | Inflamed | IKBKE     | protein_cc chr1  | 2.07E+08 | 2.07E+08 | + | 3568  | 1316.012 | 0        | -0.285   | 0.077377 | -3.6833  | 0.000375 | 0.003276 | 1 |
| ENSG0000 response | Inflamed | GAP43     | protein_cc chr3  | 1.15E+08 | 1.15E+08 | + | 2087  | 19.66826 | 0.114558 | -1.16004 | 0.31502  | -3.68245 | 0.000377 | 0.003284 | 1 |
| ENSG0000 response | Inflamed | COL4A4    | protein_cc chr2  | 2.28E+08 | 2.28E+08 | - | 9895  | 342.2387 | 0        | -0.89859 | 0.244033 | -3.68225 | 0.000377 | 0.003285 | 1 |
| ENSG0000 response | Inflamed | MIR4420   | miRNA chr1       | 31212003 | 31212079 | - | 77    | 0.842482 | 0.78043  | -0.37476 | 0.101786 | -3.6818  | 0.000377 | 0.003289 | 1 |
| ENSG0000 response | Inflamed | RP11-440C | lincRNA chr9     | 94188520 | 94189426 | + | 474   | 1.689737 | 0.594272 | -0.41651 | 0.113133 | -3.6816  | 0.000378 | 0.00329  | 1 |
| ENSG0000 response | Inflamed | PGLYRP3   | protein_cc chr1  | 1.53E+08 | 1.53E+08 | - | 1173  | 6.875895 | 0.46778  | -0.9548  | 0.259345 | -3.68158 | 0.000378 | 0.00329  | 1 |
| ENSG0000 response | Inflamed | IGLON5    | protein_cc chr19 | 51815102 | 51833608 | + | 2606  | 11.98329 | 0.164678 | -0.77848 | 0.211465 | -3.68135 | 0.000378 | 0.003291 | 1 |
| ENSG0000 response | Inflamed | JAZF1     | protein_cc chr7  | 27870192 | 28220362 | - | 4020  | 349.5728 | 0        | -0.575   | 0.156214 | -3.68086 | 0.000379 | 0.003296 | 1 |
| ENSG0000 response | Inflamed | OVOL3     | protein_cc chr19 | 36602104 | 36604613 | + | 879   | 3.673031 | 0.563246 | -0.74347 | 0.202007 | -3.68041 | 0.000379 | 0.0033   | 1 |
| ENSG0000 response | Inflamed | SPRN      | protein_cc chr10 | 1.35E+08 | 1.35E+08 | - | 3269  | 7.813842 | 0.133652 | -0.6785  | 0.184374 | -3.68001 | 0.00038  | 0.003303 | 1 |
| ENSG0000 response | Inflamed | AC093415  | processed_chr3   | 37786923 | 37903271 | - | 6017  | 67.19809 | 0        | 0.507882 | 0.138029 | 3.679532 | 0.00038  | 0.003307 | 1 |
| ENSG0000 response | Inflamed | RPLPOP2   | pseudoger chr11  | 61382508 | 61406921 | + | 3909  | 52.94272 | 0.02148  | -1.19307 | 0.324258 | -3.6794  | 0.00038  | 0.003308 | 1 |
| ENSG0000 response | Inflamed | SH3BGRL2  | protein_cc chr6  | 80341000 | 80413372 | + | 4649  | 4317.396 | 0        | 0.804792 | 0.218757 | 3.678924 | 0.000381 | 0.003312 | 1 |
| ENSG0000 response | Inflamed | CLEC4C    | protein_cc chr12 | 7882011  | 7904201  | - | 1551  | 5.539379 | 0.357995 | -0.70684 | 0.192145 | -3.67868 | 0.000381 | 0.003314 | 1 |
| ENSG0000 response | Inflamed | DEPTOR    | protein_cc chr8  | 1.21E+08 | 1.21E+08 | + | 2622  | 352.3461 | 0        | 0.577445 | 0.157009 | 3.677777 | 0.000383 | 0.003322 | 1 |
| ENSG0000 response | Inflamed | RBM47     | protein_cc chr4  | 40425272 | 40632892 | - | 8558  | 10038.35 | 0        | 0.542306 | 0.147456 | 3.677733 | 0.000383 | 0.003322 | 1 |
| ENSG0000 response | Inflamed | SLC4A8    | protein_cc chr12 | 51785101 | 51902980 | + | 11415 | 75.30788 | 0.00716  | -0.72647 | 0.197541 | -3.67755 | 0.000383 | 0.003322 | 1 |
| ENSG0000 response | Inflamed | FANCG     | protein_cc chr9  | 35073832 | 35080013 | - | 3614  | 678.5155 | 0        | -0.29157 | 0.079285 | -3.67754 | 0.000383 | 0.003322 | 1 |
| ENSG0000 response | Inflamed | RP11-654C | lincRNA chr12    | 90276442 | 90383066 | + | 682   | 2.513126 | 0.553699 | 0.511106 | 0.138982 | 3.677498 | 0.000383 | 0.003322 | 1 |
| ENSG0000 response | Inflamed | LOXL4     | protein_cc chr10 | 1E+08    | 1E+08    | - | 3653  | 178.7757 | 0        | -0.65537 | 0.178238 | -3.67692 | 0.000384 | 0.003327 | 1 |
| ENSG0000 response | Inflamed | TNFRSF17  | protein_cc chr16 | 12058964 | 12061925 | + | 1118  | 458.7064 | 0        | -0.85769 | 0.233272 | -3.67679 | 0.000384 | 0.003328 | 1 |

|                   |          |                     |       |          |          |   |       |          |          |          |          |          |          |          |   |
|-------------------|----------|---------------------|-------|----------|----------|---|-------|----------|----------|----------|----------|----------|----------|----------|---|
| ENSG0000 response | Inflamed | AC007255 antisense  | chr7  | 29553841 | 29603286 | - | 1440  | 103.3962 | 0.00716  | 0.793453 | 0.215805 | 3.676715 | 0.000384 | 0.003328 | 1 |
| ENSG0000 response | Inflamed | SIGLEC22P pseudoger | chr19 | 51714336 | 51715344 | + | 744   | 6.608592 | 0.102625 | -0.51623 | 0.140462 | -3.67525 | 0.000386 | 0.003343 | 1 |
| ENSG0000 response | Inflamed | MT1F protein_cc     | chr16 | 56691606 | 56694610 | + | 1889  | 546.494  | 0        | 0.823056 | 0.22395  | 3.675175 | 0.000386 | 0.003343 | 1 |
| ENSG0000 response | Inflamed | PDCD1LG2 protein_cc | chr9  | 5510545  | 5571282  | + | 2418  | 125.1193 | 0.002387 | -0.76096 | 0.207059 | -3.67509 | 0.000386 | 0.003343 | 1 |
| ENSG0000 response | Inflamed | BST2 protein_cc     | chr19 | 17513748 | 17516457 | - | 1119  | 1592.995 | 0        | -0.61014 | 0.166027 | -3.67497 | 0.000386 | 0.003343 | 1 |
| ENSG0000 response | Inflamed | RP11-465E lincRNA   | chr1  | 1104737  | 1105723  | + | 987   | 898.642  | 0        | 0.844127 | 0.229721 | 3.674574 | 0.000387 | 0.003347 | 1 |
| ENSG0000 response | Inflamed | TAPBPL protein_cc   | chr12 | 6560856  | 6575683  | + | 3188  | 2992.63  | 0        | -0.31484 | 0.085704 | -3.67355 | 0.000388 | 0.003357 | 1 |
| ENSG0000 response | Inflamed | RP11-1151 antisense | chr18 | 56202647 | 56205784 | + | 2553  | 11.7852  | 0.069212 | 0.618528 | 0.168422 | 3.672481 | 0.00039  | 0.003369 | 1 |
| ENSG0000 response | Inflamed | DUOX2 protein_cc    | chr15 | 45384848 | 45406542 | - | 9834  | 52840.97 | 0        | -1.5142  | 0.412426 | -3.67145 | 0.000391 | 0.00338  | 1 |
| ENSG0000 response | Inflamed | KB-1507C5 lincRNA   | chr8  | 1.04E+08 | 1.04E+08 | + | 563   | 18.70644 | 0.105012 | -1.00808 | 0.274584 | -3.67129 | 0.000391 | 0.00338  | 1 |
| ENSG0000 response | Inflamed | AC083949 antisense  | chr2  | 42370378 | 42397441 | - | 947   | 10.81623 | 0.076372 | -0.68712 | 0.187171 | -3.6711  | 0.000392 | 0.003381 | 1 |
| ENSG0000 response | Inflamed | MAGED4B protein_cc  | chrX  | 51804923 | 51812368 | - | 4971  | 2.768496 | 0.379475 | -0.49627 | 0.135186 | -3.67103 | 0.000392 | 0.003381 | 1 |
| ENSG0000 response | Inflamed | IL34 protein_cc     | chr16 | 70613798 | 70694585 | + | 2233  | 404.1766 | 0        | -0.63474 | 0.17294  | -3.67031 | 0.000393 | 0.003388 | 1 |
| ENSG0000 response | Inflamed | ITGB2-AS1 antisense | chr21 | 46340966 | 46349593 | + | 2438  | 298.1265 | 0        | -0.95815 | 0.261096 | -3.66973 | 0.000393 | 0.003394 | 1 |
| ENSG0000 response | Inflamed | C1orf106 protein_cc | chr1  | 2.01E+08 | 2.01E+08 | + | 5413  | 6366.816 | 0        | 0.746673 | 0.203524 | 3.668719 | 0.000395 | 0.003404 | 1 |
| ENSG0000 response | Inflamed | CLDN8 protein_cc    | chr21 | 31586324 | 31588391 | - | 2068  | 198.4177 | 0.408115 | 1.796021 | 0.489557 | 3.668665 | 0.000395 | 0.003404 | 1 |
| ENSG0000 response | Inflamed | IGLVI-70 IG_V_pseu  | chr22 | 22380474 | 22380991 | + | 390   | 215.6516 | 0.02148  | -1.15908 | 0.315963 | -3.6684  | 0.000395 | 0.003406 | 1 |
| ENSG0000 response | Inflamed | EMX1 protein_cc     | chr2  | 73143389 | 73162020 | + | 3721  | 12.63962 | 0.210024 | 0.80346  | 0.219086 | 3.66732  | 0.000397 | 0.003418 | 1 |
| ENSG0000 response | Inflamed | PIK3AP1 protein_cc  | chr10 | 98353069 | 98480271 | - | 5691  | 1655.585 | 0        | -0.60432 | 0.164805 | -3.6669  | 0.000397 | 0.003421 | 1 |
| ENSG0000 response | Inflamed | SP110 protein_cc    | chr2  | 2.31E+08 | 2.31E+08 | - | 6865  | 1155.749 | 0        | -0.47251 | 0.12886  | -3.66685 | 0.000397 | 0.003421 | 1 |
| ENSG0000 response | Inflamed | AC104809 processed  | chr2  | 2.42E+08 | 2.42E+08 | - | 2656  | 19.00239 | 0.126492 | -1.00513 | 0.274126 | -3.66668 | 0.000398 | 0.003422 | 1 |
| ENSG0000 response | Inflamed | CNKSR2 protein_cc   | chrX  | 21392536 | 21672813 | + | 7160  | 15.31742 | 0.076372 | -0.82871 | 0.226022 | -3.6665  | 0.000398 | 0.003422 | 1 |
| ENSG0000 response | Inflamed | RP11-326C antisense | chr11 | 318640   | 325631   | + | 1887  | 22.93795 | 0.016706 | -0.61889 | 0.168798 | -3.66648 | 0.000398 | 0.003422 | 1 |
| ENSG0000 response | Inflamed | F2R protein_cc      | chr5  | 76011868 | 76031606 | + | 4066  | 1654.344 | 0        | -0.65857 | 0.179697 | -3.66486 | 0.0004   | 0.00344  | 1 |
| ENSG0000 response | Inflamed | PIGZ protein_cc     | chr3  | 1.97E+08 | 1.97E+08 | - | 3211  | 2712.305 | 0        | 0.821502 | 0.224197 | 3.664196 | 0.000401 | 0.003447 | 1 |
| ENSG0000 response | Inflamed | RP11-148C lincRNA   | chr8  | 11409997 | 11410500 | - | 504   | 2.78043  | 0.584726 | -0.58611 | 0.159978 | -3.6637  | 0.000402 | 0.003452 | 1 |
| ENSG0000 response | Inflamed | KLF1 protein_cc     | chr19 | 12995237 | 12997995 | - | 1592  | 3.260143 | 0.286396 | -0.51747 | 0.14128  | -3.66271 | 0.000403 | 0.003462 | 1 |
| ENSG0000 response | Inflamed | SNPH protein_cc     | chr20 | 1246960  | 1289972  | + | 5572  | 654.3604 | 0        | -0.79791 | 0.217857 | -3.66256 | 0.000403 | 0.003462 | 1 |
| ENSG0000 response | Inflamed | MAP3K12 protein_cc  | chr12 | 53874274 | 53893847 | - | 7150  | 628.7494 | 0        | -0.59708 | 0.163022 | -3.66254 | 0.000403 | 0.003462 | 1 |
| ENSG0000 response | Inflamed | PDE4B protein_cc    | chr1  | 66258197 | 66840259 | + | 8641  | 1142.138 | 0        | -0.9471  | 0.258694 | -3.6611  | 0.000405 | 0.003478 | 1 |
| ENSG0000 response | Inflamed | AFG3L2 protein_cc   | chr18 | 12328943 | 12377313 | - | 6624  | 3582.146 | 0        | 0.425189 | 0.116139 | 3.661028 | 0.000405 | 0.003478 | 1 |
| ENSG0000 response | Inflamed | CD52 protein_cc     | chr1  | 26644448 | 26647014 | + | 935   | 824.2243 | 0        | -0.74601 | 0.203799 | -3.66053 | 0.000406 | 0.003483 | 1 |
| ENSG0000 response | Inflamed | LGALS1 protein_cc   | chr2  | 64681103 | 64688515 | + | 4003  | 1109.031 | 0        | 0.535941 | 0.146426 | 3.660154 | 0.000407 | 0.003486 | 1 |
| ENSG0000 response | Inflamed | RP11-434F antisense | chr2  | 1.44E+08 | 1.44E+08 | - | 884   | 3.668258 | 0.477327 | 0.646763 | 0.17681  | 3.65795  | 0.00041  | 0.003511 | 1 |
| ENSG0000 response | Inflamed | PDK2 protein_cc     | chr17 | 48172101 | 48189516 | + | 5481  | 1912.814 | 0        | 0.455599 | 0.124556 | 3.657799 | 0.00041  | 0.003512 | 1 |
| ENSG0000 response | Inflamed | INPP5D protein_cc   | chr2  | 2.34E+08 | 2.34E+08 | + | 6998  | 3076.222 | 0        | -0.52549 | 0.143693 | -3.65703 | 0.000411 | 0.00352  | 1 |
| ENSG0000 response | Inflamed | TOM1L1 protein_cc   | chr17 | 52976748 | 53039310 | + | 7268  | 980.4797 | 0        | 0.554452 | 0.151639 | 3.656399 | 0.000412 | 0.003525 | 1 |
| ENSG0000 response | Inflamed | RP11-157F antisense | chr20 | 60928051 | 60931536 | + | 843   | 2.350835 | 0.508353 | -0.5574  | 0.152445 | -3.65637 | 0.000412 | 0.003525 | 1 |
| ENSG0000 response | Inflamed | ABCC9 protein_cc    | chr12 | 21950335 | 22094336 | - | 11421 | 113.7613 | 0.016706 | -0.998   | 0.272952 | -3.65631 | 0.000412 | 0.003525 | 1 |
| ENSG0000 response | Inflamed | FILIP1 protein_cc   | chr6  | 76001575 | 76203454 | - | 8906  | 55.7494  | 0.01432  | -0.7559  | 0.206744 | -3.65621 | 0.000412 | 0.003525 | 1 |

|                   |          |           |            |       |          |          |   |      |          |          |          |          |          |          |          |   |
|-------------------|----------|-----------|------------|-------|----------|----------|---|------|----------|----------|----------|----------|----------|----------|----------|---|
| ENSG0000 response | Inflamed | ZNF503-A5 | lincRNA    | chr10 | 77029577 | 77133258 | + | 3272 | 101.0621 | 0        | 0.697925 | 0.190914 | 3.655693 | 0.000413 | 0.00353  | 1 |
| ENSG0000 response | Inflamed | EPHA10    | protein_cc | chr1  | 38179552 | 38230805 | - | 8151 | 2448.53  | 0        | 0.799192 | 0.218638 | 3.655315 | 0.000413 | 0.003534 | 1 |
| ENSG0000 response | Inflamed | RP11-629C | lincRNA    | chr8  | 1.35E+08 | 1.35E+08 | + | 679  | 15.26253 | 0.038186 | -0.62611 | 0.171293 | -3.65517 | 0.000414 | 0.003534 | 1 |
| ENSG0000 response | Inflamed | TRMT112   | protein_cc | chr11 | 64083932 | 64085556 | - | 1625 | 1296.881 | 0        | -0.39302 | 0.107534 | -3.65483 | 0.000414 | 0.003537 | 1 |
| ENSG0000 response | Inflamed | IL22RA2   | protein_cc | chr6  | 1.37E+08 | 1.37E+08 | - | 2886 | 22.19093 | 0.131265 | -0.86224 | 0.235946 | -3.65439 | 0.000415 | 0.003542 | 1 |
| ENSG0000 response | Inflamed | TESK2     | protein_cc | chr1  | 45809555 | 45956872 | - | 3460 | 541.4821 | 0        | 0.311596 | 0.08527  | 3.654249 | 0.000415 | 0.003542 | 1 |
| ENSG0000 response | Inflamed | RP11-439C | lincRNA    | chr8  | 1922984  | 1923480  | + | 497  | 13.65394 | 0.062053 | 0.668905 | 0.183052 | 3.654179 | 0.000415 | 0.003542 | 1 |
| ENSG0000 response | Inflamed | CDX2      | protein_cc | chr13 | 28536274 | 28545276 | - | 4122 | 8350.8   | 0        | 1.067227 | 0.292088 | 3.65379  | 0.000416 | 0.003545 | 1 |
| ENSG0000 response | Inflamed | RP5-1033t | antisense  | chr1  | 94057756 | 94071130 | + | 1954 | 279.5418 | 0.004773 | 0.715246 | 0.195773 | 3.653435 | 0.000416 | 0.003549 | 1 |
| ENSG0000 response | Inflamed | RP11-770C | antisense  | chr11 | 65556522 | 65558339 | - | 685  | 2.704057 | 0.429594 | 0.4814   | 0.13177  | 3.653325 | 0.000416 | 0.003549 | 1 |
| ENSG0000 response | Inflamed | ESAM      | protein_cc | chr11 | 1.25E+08 | 1.25E+08 | - | 3373 | 1181.325 | 0        | -0.56386 | 0.154349 | -3.65314 | 0.000416 | 0.00355  | 1 |
| ENSG0000 response | Inflamed | RP11-231E | lincRNA    | chr3  | 1.12E+08 | 1.12E+08 | - | 1563 | 17.32458 | 0.069212 | 0.810494 | 0.221871 | 3.653    | 0.000417 | 0.00355  | 1 |
| ENSG0000 response | Inflamed | COX5A     | protein_cc | chr15 | 75212132 | 75230509 | - | 1411 | 8392.408 | 0        | 0.345581 | 0.094622 | 3.652212 | 0.000418 | 0.003559 | 1 |
| ENSG0000 response | Inflamed | PXDNL     | protein_cc | chr8  | 52232138 | 52722005 | - | 5238 | 11.37232 | 0.073986 | -0.77564 | 0.212412 | -3.65159 | 0.000419 | 0.003565 | 1 |
| ENSG0000 response | Inflamed | AC226118  | lincRNA    | chr7  | 419325   | 422678   | + | 2146 | 7.169451 | 0.21957  | 0.682268 | 0.186886 | 3.65071  | 0.00042  | 0.003575 | 1 |
| ENSG0000 response | Inflamed | IGKV1D-42 | IG_V_gene  | chr2  | 90229045 | 90229531 | + | 371  | 3.5179   | 0.501193 | -0.64948 | 0.177908 | -3.65064 | 0.00042  | 0.003575 | 1 |
| ENSG0000 response | Inflamed | SLC13A5   | protein_cc | chr17 | 6588032  | 6616886  | - | 8982 | 5.606205 | 0.591885 | -1.03008 | 0.282171 | -3.65056 | 0.00042  | 0.003575 | 1 |
| ENSG0000 response | Inflamed | RP11-106C | pseudoger  | chr12 | 27855271 | 27855839 | + | 569  | 9.093079 | 0.190931 | 0.837282 | 0.229375 | 3.650275 | 0.000421 | 0.003576 | 1 |
| ENSG0000 response | Inflamed | KDEL1     | protein_cc | chr13 | 1.03E+08 | 1.03E+08 | - | 2367 | 105.8831 | 0.002387 | -0.51819 | 0.14196  | -3.65025 | 0.000421 | 0.003576 | 1 |
| ENSG0000 response | Inflamed | LINC00589 | lincRNA    | chr8  | 29531438 | 29605625 | - | 2074 | 8.48926  | 0.105012 | 0.704002 | 0.19287  | 3.650141 | 0.000421 | 0.003576 | 1 |
| ENSG0000 response | Inflamed | AOC1      | protein_cc | chr7  | 1.51E+08 | 1.51E+08 | + | 3824 | 24254.15 | 0        | 0.831304 | 0.227755 | 3.649989 | 0.000421 | 0.003577 | 1 |
| ENSG0000 response | Inflamed | SHCBP1    | protein_cc | chr16 | 46614466 | 46655538 | - | 4459 | 225.9594 | 0        | -0.70346 | 0.192733 | -3.64992 | 0.000421 | 0.003577 | 1 |
| ENSG0000 response | Inflamed | AC005264  | antisense  | chr19 | 3141574  | 3155173  | - | 2319 | 1.673031 | 0.656325 | -0.56697 | 0.155344 | -3.64976 | 0.000421 | 0.003577 | 1 |
| ENSG0000 response | Inflamed | PHEX      | protein_cc | chrX  | 22050559 | 22269427 | + | 7132 | 20.10024 | 0.052506 | -0.67999 | 0.186353 | -3.64892 | 0.000423 | 0.003587 | 1 |
| ENSG0000 response | Inflamed | MBOAT2    | protein_cc | chr2  | 8992820  | 9143942  | - | 8798 | 1329.554 | 0        | 0.597749 | 0.163845 | 3.648263 | 0.000423 | 0.003593 | 1 |
| ENSG0000 response | Inflamed | DCAF11    | protein_cc | chr14 | 24583404 | 24594451 | + | 6350 | 4773.403 | 0        | 0.257075 | 0.070467 | 3.648181 | 0.000424 | 0.003593 | 1 |
| ENSG0000 response | Inflamed | MYBL2     | protein_cc | chr20 | 42295754 | 42345136 | + | 2682 | 1627.647 | 0        | -0.46292 | 0.126913 | -3.64755 | 0.000424 | 0.0036   | 1 |
| ENSG0000 response | Inflamed | C5AR2     | protein_cc | chr19 | 47835404 | 47846606 | + | 2826 | 133.1885 | 0.002387 | -0.84315 | 0.231183 | -3.6471  | 0.000425 | 0.003604 | 1 |
| ENSG0000 response | Inflamed | MBOAT4    | protein_cc | chr8  | 29989340 | 30002202 | - | 1512 | 2.801909 | 0.431981 | 0.52881  | 0.145032 | 3.646166 | 0.000427 | 0.003615 | 1 |
| ENSG0000 response | Inflamed | SMIM14    | protein_cc | chr4  | 39547950 | 39640710 | - | 6721 | 3891.99  | 0        | 0.551027 | 0.151154 | 3.645476 | 0.000428 | 0.003622 | 1 |
| ENSG0000 response | Inflamed | MAPRE3    | protein_cc | chr2  | 27193480 | 27250064 | + | 3459 | 1123.933 | 0        | 0.448263 | 0.122968 | 3.645359 | 0.000428 | 0.003622 | 1 |
| ENSG0000 response | Inflamed | DPYSL3    | protein_cc | chr5  | 1.47E+08 | 1.47E+08 | - | 7164 | 3541.654 | 0        | -0.80308 | 0.220313 | -3.64517 | 0.000428 | 0.003624 | 1 |
| ENSG0000 response | Inflamed | APOE      | protein_cc | chr19 | 45409011 | 45412650 | + | 2191 | 6253.969 | 0        | -0.57867 | 0.15876  | -3.64495 | 0.000428 | 0.003625 | 1 |
| ENSG0000 response | Inflamed | ST14      | protein_cc | chr11 | 1.3E+08  | 1.3E+08  | + | 4350 | 32596.89 | 0        | 0.577368 | 0.158406 | 3.644854 | 0.000428 | 0.003625 | 1 |
| ENSG0000 response | Inflamed | PDE9A     | protein_cc | chr21 | 44073746 | 44195619 | + | 5266 | 2389.862 | 0        | 0.83735  | 0.229757 | 3.644497 | 0.000429 | 0.003628 | 1 |
| ENSG0000 response | Inflamed | TMEM38B   | protein_cc | chr9  | 1.08E+08 | 1.09E+08 | + | 4511 | 271.1384 | 0        | 0.407616 | 0.111862 | 3.643916 | 0.00043  | 0.003634 | 1 |
| ENSG0000 response | Inflamed | C1orf172  | protein_cc | chr1  | 27276053 | 27286897 | - | 1793 | 798.5322 | 0.002387 | 0.702356 | 0.192813 | 3.642688 | 0.000432 | 0.003649 | 1 |
| ENSG0000 response | Inflamed | ZSWIM4    | protein_cc | chr19 | 13906274 | 13943044 | + | 4713 | 567.2315 | 0        | -0.69984 | 0.192135 | -3.64242 | 0.000432 | 0.00365  | 1 |
| ENSG0000 response | Inflamed | GCA       | protein_cc | chr2  | 1.63E+08 | 1.63E+08 | + | 3664 | 821.2243 | 0        | -0.67792 | 0.18612  | -3.64236 | 0.000432 | 0.00365  | 1 |
| ENSG0000 response | Inflamed | AC093732  | antisense  | chr2  | 47262418 | 47267663 | - | 504  | 1.570406 | 0.694511 | 0.496978 | 0.136458 | 3.641992 | 0.000433 | 0.003654 | 1 |

|                   |          |           |                  |          |          |   |       |          |          |          |          |          |          |          |   |
|-------------------|----------|-----------|------------------|----------|----------|---|-------|----------|----------|----------|----------|----------|----------|----------|---|
| ENSG0000 response | Inflamed | ZBTB7B    | protein_cc chr1  | 1.55E+08 | 1.55E+08 | + | 4243  | 10001.71 | 0        | 0.387021 | 0.106273 | 3.641746 | 0.000433 | 0.003656 | 1 |
| ENSG0000 response | Inflamed | ZFAND2B   | protein_cc chr2  | 2.2E+08  | 2.2E+08  | + | 3396  | 1356.561 | 0        | 0.247848 | 0.068069 | 3.641138 | 0.000434 | 0.003662 | 1 |
| ENSG0000 response | Inflamed | GPANK1    | protein_cc chr6  | 31629006 | 31634060 | - | 3528  | 617.3413 | 0        | -0.24711 | 0.067867 | -3.64105 | 0.000434 | 0.003662 | 1 |
| ENSG0000 response | Inflamed | NRG2      | protein_cc chr5  | 1.39E+08 | 1.39E+08 | - | 4544  | 30.36754 | 0.019093 | -0.81583 | 0.224122 | -3.64014 | 0.000435 | 0.003672 | 1 |
| ENSG0000 response | Inflamed | IL17F     | protein_cc chr6  | 52101479 | 52109335 | - | 1067  | 9.959427 | 0.343675 | -0.89508 | 0.24594  | -3.63941 | 0.000436 | 0.00368  | 1 |
| ENSG0000 response | Inflamed | EBF4      | protein_cc chr20 | 2673524  | 2740753  | + | 3716  | 397.9451 | 0        | -0.53998 | 0.148377 | -3.63921 | 0.000437 | 0.003682 | 1 |
| ENSG0000 response | Inflamed | COL6A1    | protein_cc chr21 | 47401651 | 47424964 | + | 5340  | 23467.69 | 0        | -0.76684 | 0.210743 | -3.63873 | 0.000438 | 0.003687 | 1 |
| ENSG0000 response | Inflamed | D87007.1  | miRNA chr22      | 23077063 | 23077157 | + | 95    | 260.2816 | 0.004773 | -1.09247 | 0.300242 | -3.63862 | 0.000438 | 0.003687 | 1 |
| ENSG0000 response | Inflamed | EGFL7     | protein_cc chr9  | 1.4E+08  | 1.4E+08  | + | 2555  | 804.4893 | 0        | -0.62901 | 0.172882 | -3.63837 | 0.000438 | 0.003689 | 1 |
| ENSG0000 response | Inflamed | KPTN      | protein_cc chr19 | 47978401 | 47987525 | - | 2124  | 215.8759 | 0        | -0.25071 | 0.068917 | -3.63779 | 0.000439 | 0.003695 | 1 |
| ENSG0000 response | Inflamed | LINC00668 | lincRNA chr18    | 6919495  | 6929965  | - | 4866  | 1955.186 | 0.00716  | 1.306057 | 0.359045 | 3.63759  | 0.000439 | 0.003696 | 1 |
| ENSG0000 response | Inflamed | NINJ2     | protein_cc chr12 | 673462   | 772945   | - | 2048  | 163.0788 | 0        | -0.47135 | 0.129582 | -3.63749 | 0.000439 | 0.003696 | 1 |
| ENSG0000 response | Inflamed | RP11-181E | lincRNA chr2     | 1.12E+08 | 1.12E+08 | - | 1482  | 5.157518 | 0.362768 | -0.70924 | 0.195023 | -3.63671 | 0.000441 | 0.003704 | 1 |
| ENSG0000 response | Inflamed | KIAA1239  | protein_cc chr4  | 37245842 | 37451087 | + | 8325  | 28.64678 | 0.138425 | 1.107704 | 0.30459  | 3.636708 | 0.000441 | 0.003704 | 1 |
| ENSG0000 response | Inflamed | CTD-2033I | antisense chr15  | 39885781 | 39886432 | - | 281   | 7.589499 | 0.315036 | 0.89345  | 0.245686 | 3.636558 | 0.000441 | 0.003705 | 1 |
| ENSG0000 response | Inflamed | TXNDC2    | protein_cc chr18 | 9885763  | 9889272  | + | 3352  | 2.026253 | 0.513126 | -0.46995 | 0.129239 | -3.63631 | 0.000441 | 0.003706 | 1 |
| ENSG0000 response | Inflamed | CTSC      | protein_cc chr11 | 88026760 | 88070955 | - | 11421 | 7865.368 | 0        | -0.39465 | 0.108539 | -3.63603 | 0.000442 | 0.003709 | 1 |
| ENSG0000 response | Inflamed | RP11-363I | antisense chr2   | 97193677 | 97198043 | - | 440   | 1.360382 | 0.680191 | -0.41907 | 0.115259 | -3.63587 | 0.000442 | 0.003709 | 1 |
| ENSG0000 response | Inflamed | ATP5G3    | protein_cc chr2  | 1.76E+08 | 1.76E+08 | - | 6780  | 6401.482 | 0        | 0.380437 | 0.104636 | 3.635799 | 0.000442 | 0.003709 | 1 |
| ENSG0000 response | Inflamed | SEC14L6   | protein_cc chr22 | 30918786 | 30942669 | - | 3392  | 18.61814 | 0.02148  | -0.5863  | 0.161261 | -3.63573 | 0.000442 | 0.003709 | 1 |
| ENSG0000 response | Inflamed | NPY1R     | protein_cc chr4  | 1.64E+08 | 1.64E+08 | - | 4180  | 113.1074 | 0.00716  | 0.980132 | 0.269622 | 3.635209 | 0.000443 | 0.003715 | 1 |
| ENSG0000 response | Inflamed | FBXO16    | protein_cc chr8  | 28205804 | 28347835 | - | 3972  | 67.22912 | 0        | -0.56192 | 0.154642 | -3.6337  | 0.000445 | 0.003733 | 1 |
| ENSG0000 response | Inflamed | KIAA1045  | protein_cc chr9  | 34957484 | 34982541 | + | 5934  | 37.18616 | 0.040573 | -1.03067 | 0.283704 | -3.6329  | 0.000446 | 0.003742 | 1 |
| ENSG0000 response | Inflamed | ENTPD6    | protein_cc chr20 | 25176329 | 25207365 | + | 5327  | 7179.243 | 0        | 0.311627 | 0.085789 | 3.632491 | 0.000447 | 0.003746 | 1 |
| ENSG0000 response | Inflamed | MURC      | protein_cc chr9  | 1.03E+08 | 1.03E+08 | + | 2615  | 8.357995 | 0.136038 | -0.69877 | 0.192429 | -3.63132 | 0.000449 | 0.003759 | 1 |
| ENSG0000 response | Inflamed | ATP13A4   | protein_cc chr3  | 1.93E+08 | 1.93E+08 | - | 6013  | 153.5704 | 0.00716  | 0.983277 | 0.27079  | 3.631146 | 0.000449 | 0.00376  | 1 |
| ENSG0000 response | Inflamed | DNAJB9    | protein_cc chr7  | 1.08E+08 | 1.08E+08 | + | 2837  | 1327.58  | 0        | -0.64325 | 0.177154 | -3.63102 | 0.000449 | 0.003761 | 1 |
| ENSG0000 response | Inflamed | IGKV2OR2  | IG_V_pseu chr22  | 17395125 | 17395871 | - | 367   | 21.46539 | 0.078759 | -0.9912  | 0.273013 | -3.63061 | 0.00045  | 0.003764 | 1 |
| ENSG0000 response | Inflamed | RP11-563I | sense_intr chr10 | 50086067 | 50086694 | + | 273   | 1.221957 | 0.718377 | -0.39793 | 0.109604 | -3.63057 | 0.00045  | 0.003764 | 1 |
| ENSG0000 response | Inflamed | SACS      | protein_cc chr13 | 23902965 | 24007841 | - | 15880 | 250.7327 | 0        | -0.82562 | 0.227422 | -3.63034 | 0.00045  | 0.003766 | 1 |
| ENSG0000 response | Inflamed | LINGO1    | protein_cc chr15 | 77905369 | 78113242 | - | 4902  | 146.2983 | 0.002387 | -0.83883 | 0.231079 | -3.63004 | 0.000451 | 0.003768 | 1 |
| ENSG0000 response | Inflamed | FAIM3     | protein_cc chr1  | 2.07E+08 | 2.07E+08 | - | 2348  | 956.6635 | 0        | -0.7437  | 0.204874 | -3.63002 | 0.000451 | 0.003768 | 1 |
| ENSG0000 response | Inflamed | MAP2K1    | protein_cc chr15 | 66679155 | 66784650 | + | 3759  | 2141.22  | 0        | -0.32795 | 0.090364 | -3.62921 | 0.000452 | 0.003777 | 1 |
| ENSG0000 response | Inflamed | LINC00987 | lincRNA chr12    | 9392599  | 9395635  | + | 2459  | 54.19093 | 0        | -0.6363  | 0.175332 | -3.62913 | 0.000452 | 0.003777 | 1 |
| ENSG0000 response | Inflamed | SNAI3-AS1 | antisense chr16  | 88729706 | 88753594 | + | 5037  | 67.82578 | 0        | -0.42973 | 0.118412 | -3.62906 | 0.000452 | 0.003777 | 1 |
| ENSG0000 response | Inflamed | ILVBL     | protein_cc chr19 | 15225795 | 15236596 | - | 5615  | 3424.095 | 0        | 0.303335 | 0.083589 | 3.628907 | 0.000452 | 0.003777 | 1 |
| ENSG0000 response | Inflamed | SPARC     | protein_cc chr5  | 1.51E+08 | 1.51E+08 | - | 4831  | 22410    | 0        | -0.74107 | 0.204266 | -3.62799 | 0.000454 | 0.003787 | 1 |
| ENSG0000 response | Inflamed | RIPK2     | protein_cc chr8  | 90769975 | 90803291 | + | 3117  | 421.5967 | 0        | -0.50959 | 0.140461 | -3.62796 | 0.000454 | 0.003787 | 1 |
| ENSG0000 response | Inflamed | IGHV2-70  | IG_V_gene chr14  | 1.07E+08 | 1.07E+08 | - | 433   | 4440.604 | 0.009547 | -1.29735 | 0.357632 | -3.6276  | 0.000454 | 0.003791 | 1 |
| ENSG0000 response | Inflamed | UCN3      | protein_cc chr10 | 5406972  | 5416169  | + | 714   | 84.84248 | 0.019093 | 1.053235 | 0.290346 | 3.627512 | 0.000455 | 0.003791 | 1 |



|                   |          |           |                  |          |          |   |       |          |          |          |          |          |          |          |   |
|-------------------|----------|-----------|------------------|----------|----------|---|-------|----------|----------|----------|----------|----------|----------|----------|---|
| ENSG0000 response | Inflamed | CYBB      | protein_cc chrX  | 37639264 | 37672714 | + | 4423  | 2415.076 | 0        | -0.72746 | 0.200582 | -3.62674 | 0.000456 | 0.003799 | 1 |
| ENSG0000 response | Inflamed | RP11-54A9 | lincRNA chr12    | 76653619 | 76698911 | + | 1201  | 1.854415 | 0.677804 | -0.66708 | 0.18394  | -3.62661 | 0.000456 | 0.0038   | 1 |
| ENSG0000 response | Inflamed | C5orf52   | protein_cc chr5  | 1.57E+08 | 1.57E+08 | + | 686   | 47.47494 | 0.011933 | 0.558423 | 0.153992 | 3.626322 | 0.000456 | 0.003802 | 1 |
| ENSG0000 response | Inflamed | ATP8B1    | protein_cc chr18 | 55313658 | 55470333 | - | 6652  | 12863.99 | 0        | 0.772448 | 0.213024 | 3.626107 | 0.000457 | 0.003804 | 1 |
| ENSG0000 response | Inflamed | TCL1A     | protein_cc chr14 | 96176304 | 96180533 | - | 2236  | 197.2243 | 0.140811 | -1.69412 | 0.467292 | -3.62539 | 0.000458 | 0.003812 | 1 |
| ENSG0000 response | Inflamed | NLGN2     | protein_cc chr17 | 7308193  | 7323179  | + | 5550  | 1109.792 | 0        | -0.72669 | 0.20051  | -3.62422 | 0.00046  | 0.003826 | 1 |
| ENSG0000 response | Inflamed | HLA-DRB1  | protein_cc chr6  | 32546546 | 32557625 | - | 1229  | 9992.487 | 0        | -0.50762 | 0.140108 | -3.62307 | 0.000462 | 0.00384  | 1 |
| ENSG0000 response | Inflamed | RP11-431J | antisense chrX   | 16171064 | 16188992 | - | 1219  | 3.212411 | 0.637232 | 0.545961 | 0.150703 | 3.62277  | 0.000462 | 0.003843 | 1 |
| ENSG0000 response | Inflamed | RP5-1148A | antisense chr6   | 64280910 | 64282313 | - | 1404  | 127.3222 | 0        | 0.585084 | 0.161549 | 3.621708 | 0.000464 | 0.003855 | 1 |
| ENSG0000 response | Inflamed | CTD-3023J | lincRNA chr19    | 47849965 | 47850584 | + | 620   | 2.100239 | 0.565632 | -0.55508 | 0.153287 | -3.62117 | 0.000465 | 0.003861 | 1 |
| ENSG0000 response | Inflamed | HSPB8     | protein_cc chr12 | 1.2E+08  | 1.2E+08  | + | 2858  | 357.2243 | 0.002387 | -0.92452 | 0.255355 | -3.62053 | 0.000466 | 0.003868 | 1 |
| ENSG0000 response | Inflamed | RP11-728F | antisense chr11  | 1.18E+08 | 1.18E+08 | + | 1464  | 15.64678 | 0.047733 | 0.587044 | 0.16215  | 3.620383 | 0.000466 | 0.003869 | 1 |
| ENSG0000 response | Inflamed | ITM2C     | protein_cc chr2  | 2.32E+08 | 2.32E+08 | + | 2611  | 59703.79 | 0        | 0.524782 | 0.144954 | 3.620328 | 0.000466 | 0.003869 | 1 |
| ENSG0000 response | Inflamed | SH3RF1    | protein_cc chr4  | 1.7E+08  | 1.7E+08  | - | 5624  | 2323.993 | 0        | 0.559416 | 0.154545 | 3.619756 | 0.000467 | 0.003875 | 1 |
| ENSG0000 response | Inflamed | CIB2      | protein_cc chr15 | 78396948 | 78423886 | - | 2146  | 459.1933 | 0        | 0.44492  | 0.12292  | 3.619588 | 0.000467 | 0.003876 | 1 |
| ENSG0000 response | Inflamed | ENPP7P4   | pseudoger chr3   | 1.26E+08 | 1.26E+08 | + | 1086  | 7.799523 | 0.167064 | 0.776978 | 0.214664 | 3.619513 | 0.000467 | 0.003876 | 1 |
| ENSG0000 response | Inflamed | NTPCR     | protein_cc chr1  | 2.33E+08 | 2.33E+08 | + | 15854 | 1093.649 | 0        | 0.252058 | 0.069656 | 3.618592 | 0.000469 | 0.003886 | 1 |
| ENSG0000 response | Inflamed | LINC00319 | lincRNA chr21    | 44866481 | 44873773 | + | 4222  | 14.89976 | 0.083532 | 0.817216 | 0.22584  | 3.618564 | 0.000469 | 0.003886 | 1 |
| ENSG0000 response | Inflamed | WFS1      | protein_cc chr4  | 6271576  | 6304992  | + | 4513  | 1751.334 | 0        | -0.49107 | 0.135711 | -3.61845 | 0.000469 | 0.003886 | 1 |
| ENSG0000 response | Inflamed | RP11-139C | pseudoger chr4   | 9564791  | 9565570  | + | 780   | 1.331742 | 0.677804 | 0.480346 | 0.132765 | 3.618004 | 0.00047  | 0.003891 | 1 |
| ENSG0000 response | Inflamed | ZFP92     | protein_cc chrX  | 1.53E+08 | 1.53E+08 | + | 1253  | 14.80191 | 0.057279 | -0.72671 | 0.200874 | -3.61775 | 0.00047  | 0.003893 | 1 |
| ENSG0000 response | Inflamed | RP11-92K1 | lincRNA chr8     | 80944959 | 80945535 | - | 577   | 48.25776 | 0        | 0.445661 | 0.123223 | 3.616703 | 0.000472 | 0.003906 | 1 |
| ENSG0000 response | Inflamed | CDKL1     | protein_cc chr14 | 50796310 | 50883179 | - | 5961  | 209.1313 | 0.002387 | 0.606132 | 0.167597 | 3.616605 | 0.000472 | 0.003906 | 1 |
| ENSG0000 response | Inflamed | EHD2      | protein_cc chr19 | 48216600 | 48246391 | + | 3923  | 4093.893 | 0        | -0.77504 | 0.214331 | -3.61609 | 0.000473 | 0.003911 | 1 |
| ENSG0000 response | Inflamed | DLC1      | protein_cc chr8  | 12940870 | 13373167 | - | 10988 | 1041.411 | 0        | -0.62908 | 0.173997 | -3.61547 | 0.000474 | 0.003918 | 1 |
| ENSG0000 response | Inflamed | IGKV1D-17 | IG_V_gene chr2   | 90121477 | 90122133 | + | 532   | 245.8329 | 0.164678 | -1.16816 | 0.32311  | -3.61538 | 0.000474 | 0.003918 | 1 |
| ENSG0000 response | Inflamed | MICALCL   | protein_cc chr11 | 12297627 | 12380691 | + | 3448  | 334.611  | 0.009547 | 0.74995  | 0.207457 | 3.614965 | 0.000474 | 0.003923 | 1 |
| ENSG0000 response | Inflamed | AGFG2     | protein_cc chr7  | 1E+08    | 1E+08    | + | 5478  | 2916.191 | 0        | 0.545166 | 0.150815 | 3.614791 | 0.000475 | 0.003924 | 1 |
| ENSG0000 response | Inflamed | RP11-219E | antisense chr14  | 21342464 | 21343927 | - | 764   | 1.171838 | 0.756563 | 0.261763 | 0.072416 | 3.614698 | 0.000475 | 0.003924 | 1 |
| ENSG0000 response | Inflamed | ZMIZ1-AS1 | antisense chr10  | 80703085 | 80827652 | - | 4427  | 39.05967 | 0.009547 | -0.65114 | 0.180151 | -3.61439 | 0.000475 | 0.003927 | 1 |
| ENSG0000 response | Inflamed | KIAA0922  | protein_cc chr4  | 1.54E+08 | 1.55E+08 | + | 6393  | 722.5919 | 0        | -0.66834 | 0.184919 | -3.61424 | 0.000476 | 0.003927 | 1 |
| ENSG0000 response | Inflamed | KRBA1     | protein_cc chr7  | 1.49E+08 | 1.49E+08 | + | 5336  | 255.1575 | 0        | -0.50359 | 0.139341 | -3.6141  | 0.000476 | 0.003928 | 1 |
| ENSG0000 response | Inflamed | FAM95B1   | processed_chr9   | 42466317 | 42474239 | + | 7923  | 31.36993 | 0.040573 | 0.818003 | 0.226346 | 3.613944 | 0.000476 | 0.003929 | 1 |
| ENSG0000 response | Inflamed | ATP6V1C2  | protein_cc chr2  | 10861775 | 10925236 | + | 3324  | 52.61337 | 0.01432  | 0.889243 | 0.246078 | 3.613669 | 0.000477 | 0.00393  | 1 |
| ENSG0000 response | Inflamed | RP5-1092A | antisense chr1   | 3575502  | 3585336  | - | 754   | 2.047733 | 0.52506  | -0.4748  | 0.131394 | -3.61357 | 0.000477 | 0.00393  | 1 |
| ENSG0000 response | Inflamed | CYB5B     | protein_cc chr16 | 69458428 | 69500169 | + | 6903  | 2962.143 | 0        | 0.332527 | 0.092022 | 3.613561 | 0.000477 | 0.00393  | 1 |
| ENSG0000 response | Inflamed | RNF152    | protein_cc chr18 | 59475296 | 59561480 | - | 9924  | 877.3819 | 0        | 0.830594 | 0.229874 | 3.61326  | 0.000477 | 0.003932 | 1 |
| ENSG0000 response | Inflamed | SIGIRR    | protein_cc chr11 | 405716   | 417455   | - | 3496  | 2475.279 | 0        | 0.305185 | 0.084463 | 3.613255 | 0.000477 | 0.003932 | 1 |
| ENSG0000 response | Inflamed | IGLV5-45  | IG_V_gene chr22  | 22730355 | 22730874 | + | 397   | 1427.527 | 0        | -1.09669 | 0.303547 | -3.61293 | 0.000478 | 0.003935 | 1 |
| ENSG0000 response | Inflamed | KISS1     | protein_cc chr1  | 2.04E+08 | 2.04E+08 | - | 709   | 3.649165 | 0.429594 | 0.583195 | 0.161431 | 3.612662 | 0.000478 | 0.003937 | 1 |

|                   |          |            |                  |          |          |   |       |          |          |          |          |          |          |          |   |
|-------------------|----------|------------|------------------|----------|----------|---|-------|----------|----------|----------|----------|----------|----------|----------|---|
| ENSG0000 response | Inflamed | GPR3       | protein_cc chr1  | 27719148 | 27722318 | + | 2115  | 15.92124 | 0.078759 | -0.76226 | 0.211034 | -3.61205 | 0.000479 | 0.003944 | 1 |
| ENSG0000 response | Inflamed | FAM26F     | protein_cc chr6  | 1.17E+08 | 1.17E+08 | + | 1186  | 361.5036 | 0        | -0.79383 | 0.219803 | -3.61155 | 0.00048  | 0.00395  | 1 |
| ENSG0000 response | Inflamed | TFE3       | protein_cc chrX  | 48886242 | 48901012 | - | 4278  | 3137.461 | 0        | -0.32797 | 0.090824 | -3.61105 | 0.000481 | 0.003955 | 1 |
| ENSG0000 response | Inflamed | CYB5R2     | protein_cc chr11 | 7686331  | 7698453  | - | 8596  | 202.0525 | 0        | -0.4653  | 0.128859 | -3.61095 | 0.000481 | 0.003956 | 1 |
| ENSG0000 response | Inflamed | IQSEC1     | protein_cc chr3  | 12938719 | 13114617 | - | 6883  | 2820.573 | 0        | -0.55496 | 0.153696 | -3.61076 | 0.000481 | 0.003957 | 1 |
| ENSG0000 response | Inflamed | AL139099.  | protein_cc chr14 | 50064193 | 50065882 | - | 1690  | 23.13126 | 0.009547 | 0.519685 | 0.143944 | 3.610327 | 0.000482 | 0.003961 | 1 |
| ENSG0000 response | Inflamed | IGKV2D-3C  | IG_V_gene chr2   | 89975669 | 89976489 | + | 395   | 200.6587 | 0        | -0.93566 | 0.259184 | -3.61004 | 0.000483 | 0.003964 | 1 |
| ENSG0000 response | Inflamed | SGIP1      | protein_cc chr1  | 66999066 | 67213982 | + | 10493 | 220.9045 | 0.00716  | -1.03246 | 0.286004 | -3.60995 | 0.000483 | 0.003964 | 1 |
| ENSG0000 response | Inflamed | RP11-747I  | lincRNA chr3     | 1.65E+08 | 1.65E+08 | - | 1948  | 34.47494 | 0.095465 | 1.075516 | 0.297941 | 3.609824 | 0.000483 | 0.003964 | 1 |
| ENSG0000 response | Inflamed | ZNF703     | protein_cc chr8  | 37553269 | 37557537 | + | 3347  | 4303.289 | 0        | 0.484037 | 0.134098 | 3.609574 | 0.000483 | 0.003967 | 1 |
| ENSG0000 response | Inflamed | RP1-79C4.  | lincRNA chr1     | 1.71E+08 | 1.71E+08 | + | 2045  | 6.768496 | 0.367542 | -0.76935 | 0.213194 | -3.60867 | 0.000485 | 0.003977 | 1 |
| ENSG0000 response | Inflamed | SORCS2     | protein_cc chr4  | 7194265  | 7744554  | + | 6292  | 650.494  | 0        | -0.8981  | 0.248881 | -3.60854 | 0.000485 | 0.003977 | 1 |
| ENSG0000 response | Inflamed | ETFB       | protein_cc chr19 | 51848423 | 51869672 | - | 6526  | 1448.42  | 0        | 0.23876  | 0.066166 | 3.6085   | 0.000485 | 0.003977 | 1 |
| ENSG0000 response | Inflamed | LYPD1      | protein_cc chr2  | 1.33E+08 | 1.33E+08 | - | 2412  | 58.7685  | 0.016706 | -1.01006 | 0.279942 | -3.60811 | 0.000486 | 0.00398  | 1 |
| ENSG0000 response | Inflamed | P2RX7      | protein_cc chr12 | 1.22E+08 | 1.22E+08 | + | 3587  | 155.7279 | 0.01432  | -0.75946 | 0.210492 | -3.60805 | 0.000486 | 0.00398  | 1 |
| ENSG0000 response | Inflamed | RP11-351J  | lincRNA chr6     | 1.68E+08 | 1.68E+08 | - | 4569  | 6.579952 | 0.124105 | 0.581934 | 0.161291 | 3.607974 | 0.000486 | 0.00398  | 1 |
| ENSG0000 response | Inflamed | MTRNR2L2   | protein_cc chr5  | 79945819 | 79946855 | - | 1037  | 330.8592 | 0        | 0.764192 | 0.211808 | 3.607953 | 0.000486 | 0.00398  | 1 |
| ENSG0000 response | Inflamed | MSRB1      | protein_cc chr16 | 1988211  | 1993327  | - | 2157  | 1192.236 | 0        | -0.41446 | 0.114886 | -3.6076  | 0.000487 | 0.003983 | 1 |
| ENSG0000 response | Inflamed | TMEM233    | protein_cc chr12 | 1.2E+08  | 1.2E+08  | + | 1638  | 5.957041 | 0.147971 | -0.55284 | 0.153264 | -3.60707 | 0.000487 | 0.003989 | 1 |
| ENSG0000 response | Inflamed | CSPG4P13   | pseudoger chr15  | 78187026 | 78197016 | + | 4818  | 12.51074 | 0.088305 | -0.70051 | 0.194221 | -3.60679 | 0.000488 | 0.003992 | 1 |
| ENSG0000 response | Inflamed | RP1-130H:  | antisense chr22  | 30770930 | 30773862 | - | 1443  | 43.53222 | 0        | -0.47273 | 0.131089 | -3.60617 | 0.000489 | 0.003997 | 1 |
| ENSG0000 response | Inflamed | RP11-862C  | lincRNA chr14    | 93372042 | 93373827 | - | 1384  | 1.491647 | 0.663484 | 0.415284 | 0.11516  | 3.60614  | 0.000489 | 0.003997 | 1 |
| ENSG0000 response | Inflamed | SPAG6      | protein_cc chr10 | 22634399 | 22743153 | + | 4006  | 1.921241 | 0.544153 | -0.50597 | 0.140308 | -3.60613 | 0.000489 | 0.003997 | 1 |
| ENSG0000 response | Inflamed | TINAGL1    | protein_cc chr1  | 32042116 | 32053288 | + | 5925  | 5525.711 | 0        | 0.386038 | 0.10707  | 3.60549  | 0.00049  | 0.004005 | 1 |
| ENSG0000 response | Inflamed | PTGS2      | protein_cc chr1  | 1.87E+08 | 1.87E+08 | - | 5269  | 1251.661 | 0.002387 | -1.39162 | 0.386087 | -3.60441 | 0.000492 | 0.004018 | 1 |
| ENSG0000 response | Inflamed | SIDT1      | protein_cc chr3  | 1.13E+08 | 1.13E+08 | + | 8072  | 1481.117 | 0        | 0.516784 | 0.143406 | 3.603646 | 0.000493 | 0.004027 | 1 |
| ENSG0000 response | Inflamed | MAPK3      | protein_cc chr16 | 30125426 | 30134827 | - | 3669  | 10088.05 | 0        | 0.324225 | 0.089987 | 3.602996 | 0.000494 | 0.004035 | 1 |
| ENSG0000 response | Inflamed | YAE1D1     | protein_cc chr7  | 39605975 | 39649919 | + | 2569  | 295.3938 | 0        | 0.427423 | 0.118632 | 3.602934 | 0.000494 | 0.004035 | 1 |
| ENSG0000 response | Inflamed | AP001056   | lincRNA chr21    | 45595372 | 45596336 | + | 821   | 41.56802 | 0.016706 | -0.65579 | 0.182027 | -3.60271 | 0.000495 | 0.004036 | 1 |
| ENSG0000 response | Inflamed | SLC19A1    | protein_cc chr21 | 46913486 | 46964325 | - | 9998  | 732.6301 | 0        | -0.46475 | 0.129014 | -3.60234 | 0.000495 | 0.00404  | 1 |
| ENSG0000 response | Inflamed | TCTEX1D1   | protein_cc chr1  | 67218142 | 67244470 | + | 3100  | 17.77088 | 0.026253 | -0.66032 | 0.183316 | -3.60206 | 0.000496 | 0.004043 | 1 |
| ENSG0000 response | Inflamed | GNG13      | protein_cc chr16 | 848041   | 850733   | - | 984   | 23.63962 | 0.147971 | 0.959318 | 0.26634  | 3.601854 | 0.000496 | 0.004044 | 1 |
| ENSG0000 response | Inflamed | DHRS3      | protein_cc chr1  | 12627939 | 12677737 | - | 3037  | 2047.425 | 0        | 0.395485 | 0.109807 | 3.601627 | 0.000497 | 0.004045 | 1 |
| ENSG0000 response | Inflamed | TPH1       | protein_cc chr11 | 18039111 | 18063973 | - | 5626  | 342.8353 | 0.002387 | 1.213467 | 0.336925 | 3.601593 | 0.000497 | 0.004045 | 1 |
| ENSG0000 response | Inflamed | IL10RB-AS: | antisense chr21  | 34636178 | 34638565 | - | 2228  | 17.55131 | 0.004773 | -0.51181 | 0.142121 | -3.6012  | 0.000497 | 0.00405  | 1 |
| ENSG0000 response | Inflamed | ISCA1P4    | pseudoger chr15  | 41240934 | 41241067 | - | 134   | 1.231504 | 0.687351 | -0.40353 | 0.112091 | -3.60003 | 0.000499 | 0.004064 | 1 |
| ENSG0000 response | Inflamed | LETM1      | protein_cc chr4  | 1813206  | 1857974  | - | 8184  | 6057.737 | 0        | 0.438698 | 0.121865 | 3.599861 | 0.000499 | 0.004066 | 1 |
| ENSG0000 response | Inflamed | MTHFD1L    | protein_cc chr6  | 1.51E+08 | 1.51E+08 | + | 4945  | 522.6563 | 0        | -0.49494 | 0.137507 | -3.59936 | 0.0005   | 0.004071 | 1 |
| ENSG0000 response | Inflamed | CD2        | protein_cc chr1  | 1.17E+08 | 1.17E+08 | + | 1679  | 719.7184 | 0        | -0.5528  | 0.153595 | -3.59906 | 0.000501 | 0.004074 | 1 |
| ENSG0000 response | Inflamed | RP11-284E  | pseudoger chrX   | 63524927 | 63526613 | - | 1436  | 6.620525 | 0.107399 | 0.556186 | 0.154558 | 3.598566 | 0.000502 | 0.004079 | 1 |

|                   |          |            |                  |          |          |   |       |          |          |          |          |          |          |          |   |
|-------------------|----------|------------|------------------|----------|----------|---|-------|----------|----------|----------|----------|----------|----------|----------|---|
| ENSG0000 response | Inflamed | COL1A2     | protein_cc chr7  | 94023873 | 94060544 | + | 11151 | 40900    | 0        | -0.84422 | 0.23461  | -3.59839 | 0.000502 | 0.004079 | 1 |
| ENSG0000 response | Inflamed | FABP5P1    | pseudoger chr13  | 73674713 | 73675123 | - | 411   | 5.813842 | 0.131265 | 0.521792 | 0.14501  | 3.598327 | 0.000502 | 0.004079 | 1 |
| ENSG0000 response | Inflamed | CD163      | protein_cc chr12 | 7623409  | 7656489  | - | 5813  | 2292.465 | 0        | -0.6668  | 0.185308 | -3.59832 | 0.000502 | 0.004079 | 1 |
| ENSG0000 response | Inflamed | MGLL       | protein_cc chr3  | 1.27E+08 | 1.28E+08 | - | 10056 | 19090.93 | 0        | 0.408251 | 0.113474 | 3.597761 | 0.000503 | 0.004086 | 1 |
| ENSG0000 response | Inflamed | IL17RE     | protein_cc chr3  | 9944296  | 9958086  | + | 4676  | 2796.282 | 0        | 0.607694 | 0.168916 | 3.597605 | 0.000503 | 0.004087 | 1 |
| ENSG0000 response | Inflamed | PMM1       | protein_cc chr22 | 41972898 | 41985894 | - | 5082  | 1107.749 | 0        | 0.350269 | 0.09737  | 3.597311 | 0.000504 | 0.00409  | 1 |
| ENSG0000 response | Inflamed | ALOX12B    | protein_cc chr17 | 7975954  | 7991021  | - | 2656  | 12.72792 | 0.081146 | 0.658381 | 0.183031 | 3.597096 | 0.000504 | 0.004091 | 1 |
| ENSG0000 response | Inflamed | APOBEC3C   | protein_cc chr22 | 39410368 | 39429281 | + | 2545  | 394.9618 | 0        | -0.47972 | 0.133374 | -3.59676 | 0.000505 | 0.004095 | 1 |
| ENSG0000 response | Inflamed | TMEM210    | protein_cc chr9  | 1.4E+08  | 1.4E+08  | - | 1139  | 5.045346 | 0.205251 | 0.587207 | 0.16327  | 3.596553 | 0.000505 | 0.004096 | 1 |
| ENSG0000 response | Inflamed | ATOX1      | protein_cc chr5  | 1.51E+08 | 1.51E+08 | - | 5239  | 947      | 0        | -0.33968 | 0.094449 | -3.59643 | 0.000505 | 0.004096 | 1 |
| ENSG0000 response | Inflamed | SPRY2      | protein_cc chr13 | 80910111 | 80915086 | - | 3289  | 1721.523 | 0        | 0.426585 | 0.118617 | 3.596322 | 0.000506 | 0.004096 | 1 |
| ENSG0000 response | Inflamed | CYP2S1     | protein_cc chr19 | 41698954 | 41713444 | + | 2874  | 3179.609 | 0        | 0.680858 | 0.189323 | 3.596279 | 0.000506 | 0.004096 | 1 |
| ENSG0000 response | Inflamed | SLC35A1    | protein_cc chr6  | 88180341 | 88222054 | + | 1994  | 474.389  | 0        | 0.520547 | 0.14477  | 3.595674 | 0.000507 | 0.004102 | 1 |
| ENSG0000 response | Inflamed | PLEKHA6    | protein_cc chr1  | 2.04E+08 | 2.04E+08 | - | 7820  | 7996.263 | 0        | 0.576413 | 0.160308 | 3.595656 | 0.000507 | 0.004102 | 1 |
| ENSG0000 response | Inflamed | RP11-8L2.1 | processed_chr4   | 84717589 | 85214565 | - | 3588  | 2.610979 | 0.570406 | 0.499567 | 0.138985 | 3.5944   | 0.000509 | 0.004119 | 1 |
| ENSG0000 response | Inflamed | DFNA5      | protein_cc chr7  | 24737972 | 24809244 | - | 9537  | 113.5967 | 0.002387 | -0.69343 | 0.19293  | -3.59422 | 0.000509 | 0.00412  | 1 |
| ENSG0000 response | Inflamed | ABHD17C    | protein_cc chr15 | 80972025 | 81047962 | + | 3627  | 5575.017 | 0        | 0.49302  | 0.137174 | 3.594118 | 0.000509 | 0.00412  | 1 |
| ENSG0000 response | Inflamed | TMED6      | protein_cc chr16 | 69377151 | 69385712 | - | 1411  | 33.24821 | 0.01432  | 0.665896 | 0.185278 | 3.594036 | 0.000509 | 0.00412  | 1 |
| ENSG0000 response | Inflamed | PANX1      | protein_cc chr11 | 93862094 | 93915138 | + | 2769  | 660.2124 | 0        | -0.47949 | 0.133416 | -3.59396 | 0.00051  | 0.00412  | 1 |
| ENSG0000 response | Inflamed | RAB36      | protein_cc chr22 | 23487513 | 23506537 | + | 4107  | 180.5346 | 0        | -0.56826 | 0.158141 | -3.59337 | 0.000511 | 0.004127 | 1 |
| ENSG0000 response | Inflamed | FBXO41     | protein_cc chr2  | 73481810 | 73511559 | - | 8104  | 639.1265 | 0        | -0.51757 | 0.144131 | -3.59098 | 0.000515 | 0.004158 | 1 |
| ENSG0000 response | Inflamed | NCS1       | protein_cc chr9  | 1.33E+08 | 1.33E+08 | + | 5128  | 627.4129 | 0        | -0.68087 | 0.189609 | -3.59094 | 0.000515 | 0.004158 | 1 |
| ENSG0000 response | Inflamed | FDCSP      | protein_cc chr4  | 71091788 | 71100969 | + | 566   | 412.1241 | 0.069212 | -1.60147 | 0.446011 | -3.59066 | 0.000515 | 0.004161 | 1 |
| ENSG0000 response | Inflamed | NIPAL4     | protein_cc chr5  | 1.57E+08 | 1.57E+08 | + | 4208  | 27.85203 | 0.016706 | -0.62688 | 0.174614 | -3.59008 | 0.000516 | 0.004168 | 1 |
| ENSG0000 response | Inflamed | ABHD1      | protein_cc chr2  | 27346682 | 27353680 | + | 1661  | 5.811456 | 0.116945 | -0.48616 | 0.135428 | -3.5898  | 0.000517 | 0.004171 | 1 |
| ENSG0000 response | Inflamed | TNFSF14    | protein_cc chr19 | 6663148  | 6670599  | - | 2894  | 243.9332 | 0.002387 | -0.88484 | 0.246524 | -3.58925 | 0.000518 | 0.004176 | 1 |
| ENSG0000 response | Inflamed | MRGPRF     | protein_cc chr11 | 68771863 | 68780877 | - | 2746  | 935.4033 | 0        | -0.82071 | 0.22866  | -3.58921 | 0.000518 | 0.004176 | 1 |
| ENSG0000 response | Inflamed | RP5-1119A  | lincRNA chr22    | 36841445 | 36850991 | - | 372   | 5.300716 | 0.164678 | 0.545472 | 0.151995 | 3.588763 | 0.000519 | 0.004181 | 1 |
| ENSG0000 response | Inflamed | OTOP3      | protein_cc chr17 | 72931814 | 72946087 | + | 2516  | 41.06205 | 0.171838 | 1.257071 | 0.350318 | 3.588374 | 0.000519 | 0.004186 | 1 |
| ENSG0000 response | Inflamed | ZNF319     | protein_cc chr16 | 58028572 | 58034357 | - | 4274  | 588.7709 | 0        | -0.43244 | 0.120514 | -3.58827 | 0.00052  | 0.004186 | 1 |
| ENSG0000 response | Inflamed | TAL1       | protein_cc chr1  | 47681962 | 47697892 | - | 5706  | 159.8544 | 0        | -0.60458 | 0.168497 | -3.58811 | 0.00052  | 0.004187 | 1 |
| ENSG0000 response | Inflamed | AGR3       | protein_cc chr7  | 16899029 | 16921611 | - | 1160  | 1809.134 | 0        | 0.824607 | 0.229849 | 3.58761  | 0.000521 | 0.004193 | 1 |
| ENSG0000 response | Inflamed | CRTAP      | protein_cc chr3  | 33155471 | 33189265 | + | 6695  | 4466.37  | 0        | -0.32044 | 0.089333 | -3.58699 | 0.000522 | 0.0042   | 1 |
| ENSG0000 response | Inflamed | EPS8L2     | protein_cc chr11 | 694438   | 727727   | + | 5693  | 7810.473 | 0        | 0.49456  | 0.137929 | 3.585612 | 0.000524 | 0.004219 | 1 |
| ENSG0000 response | Inflamed | MOGAT3     | protein_cc chr7  | 1.01E+08 | 1.01E+08 | - | 2218  | 1323.742 | 0.002387 | 0.81226  | 0.226542 | 3.585468 | 0.000524 | 0.004219 | 1 |
| ENSG0000 response | Inflamed | TBC1D1     | protein_cc chr4  | 37892708 | 38140796 | + | 9027  | 2966.974 | 0        | -0.31688 | 0.088419 | -3.58381 | 0.000527 | 0.00424  | 1 |
| ENSG0000 response | Inflamed | THAP3      | protein_cc chr1  | 6684926  | 6695646  | + | 4072  | 381.2148 | 0        | -0.21074 | 0.058805 | -3.58373 | 0.000528 | 0.00424  | 1 |
| ENSG0000 response | Inflamed | RP11-38J2  | lincRNA chr1     | 2.06E+08 | 2.06E+08 | - | 965   | 30.51313 | 0.016706 | -0.81234 | 0.226675 | -3.58371 | 0.000528 | 0.00424  | 1 |
| ENSG0000 response | Inflamed | TMEM184    | protein_cc chr22 | 38615298 | 38669040 | - | 5014  | 4251.387 | 0        | -0.33639 | 0.093868 | -3.58364 | 0.000528 | 0.00424  | 1 |
| ENSG0000 response | Inflamed | CDC25B     | protein_cc chr20 | 3767578  | 3786762  | + | 4149  | 3511.518 | 0        | -0.50349 | 0.140501 | -3.58354 | 0.000528 | 0.004241 | 1 |

|                   |          |                     |                  |          |          |   |      |          |          |          |          |          |          |          |   |
|-------------------|----------|---------------------|------------------|----------|----------|---|------|----------|----------|----------|----------|----------|----------|----------|---|
| ENSG0000 response | Inflamed | SCIN                | protein_cc chr7  | 12610203 | 12693228 | + | 5048 | 1371.9   | 0.002387 | 0.956404 | 0.266927 | 3.583022 | 0.000529 | 0.004247 | 1 |
| ENSG0000 response | Inflamed | RP11-491F antisense | chr16            | 49321341 | 49324138 | + | 654  | 7.933174 | 0.145585 | 0.596397 | 0.166459 | 3.582852 | 0.000529 | 0.004248 | 1 |
| ENSG0000 response | Inflamed | AC108004            | lincRNA chr17    | 33615    | 41378    | - | 1185 | 3.832936 | 0.336516 | -0.60114 | 0.167787 | -3.58278 | 0.000529 | 0.004248 | 1 |
| ENSG0000 response | Inflamed | TRBV11-2            | lincRNA chr7     | 1.42E+08 | 1.42E+08 | - | 408  | 14.46778 | 0.052506 | -0.61323 | 0.171183 | -3.58232 | 0.00053  | 0.004253 | 1 |
| ENSG0000 response | Inflamed | APOL2               | protein_cc chr22 | 36622256 | 36636000 | - | 3477 | 3123.263 | 0        | -0.5942  | 0.165873 | -3.58225 | 0.00053  | 0.004253 | 1 |
| ENSG0000 response | Inflamed | KIF3C               | protein_cc chr2  | 26149471 | 26205618 | - | 6397 | 261.7685 | 0.004773 | -0.67119 | 0.187385 | -3.58188 | 0.000531 | 0.004257 | 1 |
| ENSG0000 response | Inflamed | PCED1A              | protein_cc chr20 | 2815960  | 2821836  | - | 2341 | 1123.432 | 0        | -0.43434 | 0.121277 | -3.58137 | 0.000532 | 0.004262 | 1 |
| ENSG0000 response | Inflamed | IGHJ6               | IG_J_gene chr14  | 1.06E+08 | 1.06E+08 | - | 61   | 263.58   | 0.011933 | -1.04944 | 0.29303  | -3.58136 | 0.000532 | 0.004262 | 1 |
| ENSG0000 response | Inflamed | CHST3               | protein_cc chr10 | 73724123 | 73773322 | + | 6970 | 790.6945 | 0        | -0.8277  | 0.231144 | -3.58087 | 0.000533 | 0.004265 | 1 |
| ENSG0000 response | Inflamed | AC145110            | lincRNA chr8     | 29605825 | 29656008 | + | 5541 | 4.73031  | 0.429594 | -0.70036 | 0.195585 | -3.58086 | 0.000533 | 0.004265 | 1 |
| ENSG0000 response | Inflamed | AP001631            | protein_cc chr21 | 44579176 | 44582387 | - | 1052 | 1.169451 | 0.761337 | -0.4845  | 0.135302 | -3.58085 | 0.000533 | 0.004265 | 1 |
| ENSG0000 response | Inflamed | COL6A2              | protein_cc chr21 | 47518011 | 47552763 | + | 5386 | 29693.77 | 0        | -0.71133 | 0.198673 | -3.58043 | 0.000534 | 0.004269 | 1 |
| ENSG0000 response | Inflamed | MGST2               | protein_cc chr4  | 1.41E+08 | 1.41E+08 | + | 3182 | 1439.551 | 0        | 0.40278  | 0.112497 | 3.580358 | 0.000534 | 0.004269 | 1 |
| ENSG0000 response | Inflamed | RAB26               | protein_cc chr16 | 2190804  | 2204166  | + | 2488 | 277.222  | 0        | 0.521285 | 0.145597 | 3.580321 | 0.000534 | 0.004269 | 1 |
| ENSG0000 response | Inflamed | PRRT3               | protein_cc chr3  | 9987226  | 9994078  | - | 3939 | 84.04773 | 0        | -0.3857  | 0.107733 | -3.5801  | 0.000534 | 0.004271 | 1 |
| ENSG0000 response | Inflamed | RP11-340F           | sense_ove chr12  | 1.22E+08 | 1.22E+08 | + | 477  | 27.10501 | 0.019093 | -0.6818  | 0.190445 | -3.58002 | 0.000534 | 0.004271 | 1 |
| ENSG0000 response | Inflamed | ZNF784              | protein_cc chr19 | 56132108 | 56135967 | - | 2058 | 400.5322 | 0        | 0.255836 | 0.07147  | 3.579612 | 0.000535 | 0.004275 | 1 |
| ENSG0000 response | Inflamed | MFSD2B              | protein_cc chr2  | 24232951 | 24286191 | + | 4438 | 8.427208 | 0.050119 | -0.52529 | 0.146772 | -3.57895 | 0.000536 | 0.004283 | 1 |
| ENSG0000 response | Inflamed | TMPRSS4             | protein_cc chr11 | 1.18E+08 | 1.18E+08 | + | 9922 | 10408.47 | 0        | 0.745531 | 0.208313 | 3.578896 | 0.000536 | 0.004283 | 1 |
| ENSG0000 response | Inflamed | NCKAP5L             | protein_cc chr12 | 50184929 | 50222533 | - | 8090 | 799.0334 | 0        | -0.57249 | 0.159981 | -3.57848 | 0.000537 | 0.004288 | 1 |
| ENSG0000 response | Inflamed | PDCD4               | protein_cc chr10 | 1.13E+08 | 1.13E+08 | + | 4535 | 7016.914 | 0        | 0.664617 | 0.185783 | 3.577381 | 0.000539 | 0.004302 | 1 |
| ENSG0000 response | Inflamed | RHOQP2              | pseudoger chr2   | 1.32E+08 | 1.32E+08 | + | 618  | 4.837709 | 0.207637 | -0.59014 | 0.164978 | -3.57711 | 0.00054  | 0.004305 | 1 |
| ENSG0000 response | Inflamed | ST6GALNA            | protein_cc chr1  | 77333126 | 77531396 | + | 4263 | 56.71838 | 0.016706 | -0.85105 | 0.237973 | -3.57624 | 0.000541 | 0.004316 | 1 |
| ENSG0000 response | Inflamed | SLC18A1             | protein_cc chr8  | 20002366 | 20040717 | - | 3910 | 169.9212 | 0.004773 | 0.858166 | 0.239976 | 3.576052 | 0.000541 | 0.004317 | 1 |
| ENSG0000 response | Inflamed | CACNG8              | protein_cc chr19 | 54466294 | 54493469 | + | 8747 | 6.178998 | 0.257757 | -0.68444 | 0.191397 | -3.57599 | 0.000542 | 0.004317 | 1 |
| ENSG0000 response | Inflamed | DOK4                | protein_cc chr16 | 57505863 | 57521239 | - | 4759 | 7156.043 | 0        | 0.429043 | 0.120019 | 3.574782 | 0.000544 | 0.004334 | 1 |
| ENSG0000 response | Inflamed | MBOAT1              | protein_cc chr6  | 20100935 | 20212670 | - | 3287 | 1935.103 | 0        | 0.553247 | 0.154779 | 3.574445 | 0.000544 | 0.004337 | 1 |
| ENSG0000 response | Inflamed | BTN2A2              | protein_cc chr6  | 26383324 | 26395102 | + | 6398 | 779.6778 | 0        | -0.53998 | 0.151081 | -3.5741  | 0.000545 | 0.004341 | 1 |
| ENSG0000 response | Inflamed | C19orf12            | protein_cc chr19 | 30191721 | 30206364 | - | 3223 | 745.6277 | 0        | -0.26888 | 0.075245 | -3.57332 | 0.000547 | 0.004351 | 1 |
| ENSG0000 response | Inflamed | NR6A1               | protein_cc chr9  | 1.27E+08 | 1.28E+08 | - | 7124 | 428.1575 | 0        | 0.631231 | 0.176658 | 3.573181 | 0.000547 | 0.004352 | 1 |
| ENSG0000 response | Inflamed | CHRNE               | protein_cc chr17 | 4801069  | 4806369  | - | 2641 | 51.42005 | 0        | -0.57841 | 0.161906 | -3.5725  | 0.000548 | 0.004361 | 1 |
| ENSG0000 response | Inflamed | KRT73               | protein_cc chr12 | 53001354 | 53012343 | - | 2652 | 6.78043  | 0.355609 | -0.74205 | 0.207724 | -3.57229 | 0.000548 | 0.004361 | 1 |
| ENSG0000 response | Inflamed | ACTC1               | protein_cc chr15 | 35080297 | 35088340 | - | 4639 | 15.31742 | 0.408115 | -1.33448 | 0.373565 | -3.57229 | 0.000548 | 0.004361 | 1 |
| ENSG0000 response | Inflamed | PEBP1               | protein_cc chr12 | 1.19E+08 | 1.19E+08 | + | 1780 | 6126.933 | 0        | 0.297947 | 0.083408 | 3.572165 | 0.000549 | 0.004362 | 1 |
| ENSG0000 response | Inflamed | ARHGAP8             | protein_cc chr22 | 45098355 | 45258665 | + | 5678 | 209.611  | 0.004773 | 0.822844 | 0.230376 | 3.571742 | 0.000549 | 0.004367 | 1 |
| ENSG0000 response | Inflamed | RP11-528F           | lincRNA chr3     | 1.94E+08 | 1.94E+08 | - | 984  | 100.0644 | 0.01432  | 0.811628 | 0.227262 | 3.571337 | 0.00055  | 0.004371 | 1 |
| ENSG0000 response | Inflamed | WBSCR28             | protein_cc chr7  | 73275489 | 73280223 | + | 977  | 2.150358 | 0.642005 | 0.520595 | 0.145802 | 3.570556 | 0.000552 | 0.004381 | 1 |
| ENSG0000 response | Inflamed | RP11-307E           | lincRNA chr9     | 97094758 | 97123230 | + | 2162 | 13.97375 | 0.078759 | -0.7212  | 0.201989 | -3.57049 | 0.000552 | 0.004381 | 1 |
| ENSG0000 response | Inflamed | MTL5                | protein_cc chr11 | 68474908 | 68519032 | - | 5833 | 277.6516 | 0        | 0.424155 | 0.118805 | 3.570172 | 0.000552 | 0.004384 | 1 |
| ENSG0000 response | Inflamed | RP11-10A1           | lincRNA chr8     | 9046521  | 9060364  | + | 875  | 8.183771 | 0.422434 | -0.96326 | 0.269856 | -3.56952 | 0.000554 | 0.004393 | 1 |

|                   |          |           |                  |          |          |   |      |          |          |          |          |          |          |          |   |
|-------------------|----------|-----------|------------------|----------|----------|---|------|----------|----------|----------|----------|----------|----------|----------|---|
| ENSG0000 response | Inflamed | SEC11C    | protein_cc chr18 | 56806709 | 56826068 | + | 3656 | 2138.809 | 0        | -0.48224 | 0.135108 | -3.56928 | 0.000554 | 0.004395 | 1 |
| ENSG0000 response | Inflamed | FBXO40    | protein_cc chr3  | 1.21E+08 | 1.21E+08 | + | 5926 | 0.830549 | 0.787589 | -0.35484 | 0.099433 | -3.56866 | 0.000555 | 0.004403 | 1 |
| ENSG0000 response | Inflamed | BICC1     | protein_cc chr10 | 60272900 | 60591195 | + | 6567 | 439.7804 | 0        | -0.77619 | 0.217509 | -3.56856 | 0.000555 | 0.004403 | 1 |
| ENSG0000 response | Inflamed | APBB1     | protein_cc chr11 | 6416355  | 6440644  | - | 5194 | 622.0263 | 0        | -0.50453 | 0.141406 | -3.56799 | 0.000556 | 0.00441  | 1 |
| ENSG0000 response | Inflamed | AL049840  | protein_cc chr14 | 1.04E+08 | 1.04E+08 | + | 1543 | 65.50597 | 0.002387 | 0.425798 | 0.119344 | 3.567831 | 0.000557 | 0.004411 | 1 |
| ENSG0000 response | Inflamed | RP11-5791 | lincRNA chr12    | 49182930 | 49184318 | + | 554  | 22.90931 | 0.023866 | 0.707881 | 0.198434 | 3.567329 | 0.000558 | 0.004417 | 1 |
| ENSG0000 response | Inflamed | FUT11     | protein_cc chr10 | 75532049 | 75540009 | + | 4885 | 768.0716 | 0        | -0.44105 | 0.123647 | -3.56704 | 0.000558 | 0.00442  | 1 |
| ENSG0000 response | Inflamed | B3GNT3    | protein_cc chr19 | 17905637 | 17923891 | + | 2301 | 7208.525 | 0        | 0.663393 | 0.186001 | 3.566618 | 0.000559 | 0.004425 | 1 |
| ENSG0000 response | Inflamed | FYB       | protein_cc chr5  | 39105338 | 39274630 | - | 6100 | 1204.246 | 0        | -0.76853 | 0.215505 | -3.56618 | 0.00056  | 0.004431 | 1 |
| ENSG0000 response | Inflamed | DTNB      | protein_cc chr2  | 25600067 | 25896503 | - | 7156 | 202.3174 | 0        | -0.35331 | 0.099097 | -3.56526 | 0.000562 | 0.004443 | 1 |
| ENSG0000 response | Inflamed | CTD-2541  | antisense chr8   | 6475996  | 6565730  | - | 3046 | 14.88783 | 0.047733 | 0.565308 | 0.15861  | 3.564127 | 0.000564 | 0.004459 | 1 |
| ENSG0000 response | Inflamed | ABAT      | protein_cc chr16 | 8768422  | 8878432  | + | 9744 | 1102.709 | 0        | 0.557368 | 0.156413 | 3.563449 | 0.000565 | 0.004468 | 1 |
| ENSG0000 response | Inflamed | AMT       | protein_cc chr3  | 49454211 | 49460186 | - | 4561 | 778.3532 | 0        | 0.4766   | 0.133786 | 3.562412 | 0.000567 | 0.004482 | 1 |
| ENSG0000 response | Inflamed | SST       | protein_cc chr3  | 1.87E+08 | 1.87E+08 | - | 618  | 651.2936 | 0.002387 | 1.185078 | 0.332685 | 3.562159 | 0.000567 | 0.004484 | 1 |
| ENSG0000 response | Inflamed | AC006132  | protein_cc chr19 | 46144752 | 46146098 | + | 1235 | 47.68974 | 0.002387 | -0.61244 | 0.171946 | -3.56183 | 0.000568 | 0.004488 | 1 |
| ENSG0000 response | Inflamed | COX6C     | protein_cc chr8  | 1.01E+08 | 1.01E+08 | - | 3066 | 3188.294 | 0        | 0.408217 | 0.114631 | 3.561143 | 0.000569 | 0.004497 | 1 |
| ENSG0000 response | Inflamed | PTPRN     | protein_cc chr2  | 2.2E+08  | 2.2E+08  | - | 8261 | 102.8902 | 0.050119 | -1.51703 | 0.426066 | -3.56056 | 0.000571 | 0.004504 | 1 |
| ENSG0000 response | Inflamed | EID3      | protein_cc chr12 | 1.05E+08 | 1.05E+08 | + | 1464 | 36.65871 | 0.004773 | -0.59032 | 0.165798 | -3.56048 | 0.000571 | 0.004504 | 1 |
| ENSG0000 response | Inflamed | ERG       | protein_cc chr21 | 39751949 | 40033704 | - | 8000 | 439.1718 | 0        | -0.72941 | 0.204869 | -3.56036 | 0.000571 | 0.004505 | 1 |
| ENSG0000 response | Inflamed | COX10     | protein_cc chr17 | 13972813 | 14111994 | + | 3172 | 989.5752 | 0        | 0.263562 | 0.074028 | 3.560289 | 0.000571 | 0.004505 | 1 |
| ENSG0000 response | Inflamed | HNF1B     | protein_cc chr17 | 36046435 | 36105237 | - | 5960 | 1481.284 | 0        | 0.803011 | 0.225617 | 3.55918  | 0.000573 | 0.00452  | 1 |
| ENSG0000 response | Inflamed | CACNA2D3  | protein_cc chr3  | 54156574 | 55108584 | + | 4670 | 29.54893 | 0.002387 | -0.58987 | 0.16578  | -3.55819 | 0.000575 | 0.004533 | 1 |
| ENSG0000 response | Inflamed | GK-IT1    | sense_intr chrX  | 30689752 | 30690283 | + | 397  | 3.427208 | 0.498807 | -0.65916 | 0.185258 | -3.55805 | 0.000575 | 0.004533 | 1 |
| ENSG0000 response | Inflamed | AC092569  | pseudoger chr2   | 30969310 | 30969567 | - | 258  | 1.692124 | 0.596659 | 0.465197 | 0.130747 | 3.557993 | 0.000576 | 0.004533 | 1 |
| ENSG0000 response | Inflamed | TXLNB     | protein_cc chr6  | 1.4E+08  | 1.4E+08  | - | 4937 | 78.87112 | 0.004773 | -0.85957 | 0.241591 | -3.55797 | 0.000576 | 0.004533 | 1 |
| ENSG0000 response | Inflamed | PAEP      | protein_cc chr9  | 1.38E+08 | 1.38E+08 | + | 1454 | 6.801909 | 0.501193 | -0.8239  | 0.231581 | -3.55773 | 0.000576 | 0.004535 | 1 |
| ENSG0000 response | Inflamed | RP11-781F | antisense chr18  | 6954676  | 6957418  | + | 2295 | 3.656325 | 0.463007 | 0.563699 | 0.158445 | 3.557684 | 0.000576 | 0.004535 | 1 |
| ENSG0000 response | Inflamed | ARHGAP23  | pseudoger chr16  | 33709886 | 33739634 | - | 2080 | 15.00477 | 0.071599 | -0.72817 | 0.204736 | -3.55663 | 0.000578 | 0.004549 | 1 |
| ENSG0000 response | Inflamed | CRYL1     | protein_cc chr13 | 20977806 | 21099996 | - | 1761 | 2189.974 | 0        | 0.44343  | 0.12468  | 3.556544 | 0.000578 | 0.004549 | 1 |
| ENSG0000 response | Inflamed | SLA2      | protein_cc chr20 | 35240721 | 35274619 | - | 2757 | 224.9857 | 0        | -0.47781 | 0.134354 | -3.55634 | 0.000579 | 0.004549 | 1 |
| ENSG0000 response | Inflamed | MROH7-17  | protein_cc chr1  | 55107459 | 55207981 | + | 7090 | 4.508353 | 0.386635 | 0.583809 | 0.16416  | 3.556334 | 0.000579 | 0.004549 | 1 |
| ENSG0000 response | Inflamed | SATB2-AS1 | antisense chr2   | 2E+08    | 2E+08    | + | 4470 | 828.9427 | 0.004773 | 1.416592 | 0.398337 | 3.556266 | 0.000579 | 0.004549 | 1 |
| ENSG0000 response | Inflamed | RFC2      | protein_cc chr7  | 73645829 | 73668774 | - | 2197 | 600.9737 | 0        | -0.29693 | 0.083498 | -3.5562  | 0.000579 | 0.004549 | 1 |
| ENSG0000 response | Inflamed | LARP6     | protein_cc chr15 | 71123863 | 71146498 | - | 3160 | 114.1527 | 0.002387 | -0.71113 | 0.200012 | -3.55546 | 0.00058  | 0.004559 | 1 |
| ENSG0000 response | Inflamed | CRABP2    | protein_cc chr1  | 1.57E+08 | 1.57E+08 | - | 1100 | 132.5131 | 0.004773 | -1.0527  | 0.29615  | -3.55461 | 0.000582 | 0.00457  | 1 |
| ENSG0000 response | Inflamed | ELFN2     | protein_cc chr22 | 37764000 | 37823505 | - | 8782 | 26.81384 | 0.038186 | -0.92179 | 0.259324 | -3.55457 | 0.000582 | 0.00457  | 1 |
| ENSG0000 response | Inflamed | AC093159  | lincRNA chr2     | 62690262 | 62691205 | + | 424  | 2.27685  | 0.513126 | -0.51673 | 0.145385 | -3.55421 | 0.000583 | 0.004575 | 1 |
| ENSG0000 response | Inflamed | SLC9A7P1  | pseudoger chr12  | 98847613 | 98850923 | - | 3311 | 16.25298 | 0.02148  | -0.61562 | 0.173233 | -3.55369 | 0.000584 | 0.004581 | 1 |
| ENSG0000 response | Inflamed | ARHGAP40  | protein_cc chr20 | 37230577 | 37279678 | + | 3195 | 2.066826 | 0.75179  | -0.64837 | 0.182464 | -3.55341 | 0.000584 | 0.004584 | 1 |
| ENSG0000 response | Inflamed | CLSTN3    | protein_cc chr12 | 7282294  | 7311541  | + | 6865 | 2677.475 | 0        | -0.65951 | 0.185606 | -3.55325 | 0.000585 | 0.004585 | 1 |

|                   |          |           |                  |          |          |   |       |          |          |          |          |          |          |          |   |
|-------------------|----------|-----------|------------------|----------|----------|---|-------|----------|----------|----------|----------|----------|----------|----------|---|
| ENSG0000 response | Inflamed | NME8      | protein_cc chr7  | 37888199 | 37940003 | + | 2439  | 11.67064 | 0.085919 | -0.70015 | 0.197049 | -3.55319 | 0.000585 | 0.004585 | 1 |
| ENSG0000 response | Inflamed | AQP5      | protein_cc chr12 | 50355653 | 50359464 | + | 1885  | 90.66826 | 0.252983 | -1.63938 | 0.461429 | -3.55283 | 0.000586 | 0.004589 | 1 |
| ENSG0000 response | Inflamed | C5orf30   | protein_cc chr5  | 1.03E+08 | 1.03E+08 | + | 3568  | 1434.663 | 0        | 0.703626 | 0.198063 | 3.552543 | 0.000586 | 0.004592 | 1 |
| ENSG0000 response | Inflamed | GGT6      | protein_cc chr17 | 4460222  | 4464113  | - | 3161  | 6135.513 | 0        | 0.871538 | 0.245373 | 3.551893 | 0.000587 | 0.004601 | 1 |
| ENSG0000 response | Inflamed | APLNR     | protein_cc chr11 | 57001051 | 57004709 | - | 3659  | 2261.489 | 0        | -0.78461 | 0.220963 | -3.55084 | 0.00059  | 0.004616 | 1 |
| ENSG0000 response | Inflamed | GS1-18A1  | antisense chr7   | 54624663 | 54639419 | + | 3031  | 3.983294 | 0.455847 | 0.659235 | 0.18569  | 3.550202 | 0.000591 | 0.004624 | 1 |
| ENSG0000 response | Inflamed | TESPA1    | protein_cc chr12 | 55341802 | 55378530 | - | 5025  | 252.1122 | 0        | -0.64682 | 0.182224 | -3.54959 | 0.000592 | 0.004632 | 1 |
| ENSG0000 response | Inflamed | CYB5R3    | protein_cc chr22 | 43013846 | 43045574 | - | 5973  | 9387.551 | 0        | -0.283   | 0.079737 | -3.54919 | 0.000593 | 0.004637 | 1 |
| ENSG0000 response | Inflamed | MAP7      | protein_cc chr6  | 1.37E+08 | 1.37E+08 | - | 4664  | 2977.604 | 0        | 0.588929 | 0.165949 | 3.548861 | 0.000594 | 0.004641 | 1 |
| ENSG0000 response | Inflamed | SPSB4     | protein_cc chr3  | 1.41E+08 | 1.41E+08 | + | 3740  | 4.293556 | 0.274463 | -0.59936 | 0.168895 | -3.54872 | 0.000594 | 0.004642 | 1 |
| ENSG0000 response | Inflamed | GPR85     | protein_cc chr7  | 1.13E+08 | 1.13E+08 | - | 7396  | 26.34129 | 0.011933 | -0.70624 | 0.199026 | -3.54851 | 0.000594 | 0.004644 | 1 |
| ENSG0000 response | Inflamed | AC137932  | antisense chr16  | 89387541 | 89391518 | + | 1360  | 1.355609 | 0.708831 | -0.44031 | 0.12409  | -3.54828 | 0.000595 | 0.004646 | 1 |
| ENSG0000 response | Inflamed | AC046143  | antisense chr3   | 1.94E+08 | 1.94E+08 | + | 972   | 43.7494  | 0        | 0.482948 | 0.136126 | 3.547804 | 0.000596 | 0.004652 | 1 |
| ENSG0000 response | Inflamed | RP11-672  | antisense chr11  | 76336506 | 76337878 | - | 831   | 1.548926 | 0.613365 | -0.4626  | 0.130409 | -3.54733 | 0.000597 | 0.004658 | 1 |
| ENSG0000 response | Inflamed | RTN2      | protein_cc chr19 | 45988547 | 46000319 | - | 3238  | 294.3031 | 0        | -0.44641 | 0.125861 | -3.54686 | 0.000598 | 0.004664 | 1 |
| ENSG0000 response | Inflamed | OLFM2     | protein_cc chr19 | 9964394  | 10047228 | - | 2500  | 244.1122 | 0        | -0.65747 | 0.185402 | -3.54616 | 0.000599 | 0.004674 | 1 |
| ENSG0000 response | Inflamed | KLC4      | protein_cc chr6  | 43008515 | 43042837 | + | 6421  | 3547.668 | 0        | 0.449576 | 0.126791 | 3.545816 | 0.0006   | 0.004678 | 1 |
| ENSG0000 response | Inflamed | HHIPL2    | protein_cc chr1  | 2.23E+08 | 2.23E+08 | - | 3287  | 11.49642 | 0.071599 | 0.655654 | 0.184926 | 3.545494 | 0.0006   | 0.00468  | 1 |
| ENSG0000 response | Inflamed | MAP1A     | protein_cc chr15 | 43803156 | 43823818 | + | 10652 | 558.9117 | 0        | -0.73179 | 0.2064   | -3.54549 | 0.0006   | 0.00468  | 1 |
| ENSG0000 response | Inflamed | TMEM177   | protein_cc chr2  | 1.2E+08  | 1.2E+08  | + | 2588  | 417.0525 | 0        | 0.2923   | 0.082447 | 3.545296 | 0.000601 | 0.004682 | 1 |
| ENSG0000 response | Inflamed | AC026310  | protein_cc chr12 | 25055243 | 25057615 | + | 2373  | 1.644391 | 0.658711 | -0.54553 | 0.153882 | -3.54514 | 0.000601 | 0.004683 | 1 |
| ENSG0000 response | Inflamed | RN7SL767  | antisense chr3   | 1.13E+08 | 1.13E+08 | + | 277   | 1.088305 | 0.720764 | 0.361924 | 0.102111 | 3.544423 | 0.000602 | 0.004693 | 1 |
| ENSG0000 response | Inflamed | CALHM1    | protein_cc chr10 | 1.05E+08 | 1.05E+08 | - | 3053  | 6.420048 | 0.200477 | -0.62399 | 0.176067 | -3.54403 | 0.000603 | 0.004697 | 1 |
| ENSG0000 response | Inflamed | ACOT8     | protein_cc chr20 | 44470360 | 44486045 | - | 4213  | 962.3079 | 0        | 0.305003 | 0.086068 | 3.543749 | 0.000604 | 0.004701 | 1 |
| ENSG0000 response | Inflamed | IL18RAP   | protein_cc chr2  | 1.03E+08 | 1.03E+08 | + | 2966  | 161.7542 | 0.002387 | -0.98531 | 0.278061 | -3.54351 | 0.000604 | 0.004703 | 1 |
| ENSG0000 response | Inflamed | CTD-2611  | antisense chr19  | 56218707 | 56219330 | + | 624   | 27.48687 | 0.059666 | 0.812839 | 0.229438 | 3.542744 | 0.000606 | 0.004714 | 1 |
| ENSG0000 response | Inflamed | SH3YL1    | protein_cc chr2  | 217730   | 266398   | - | 11165 | 1529.854 | 0        | 0.548956 | 0.154977 | 3.542177 | 0.000607 | 0.004721 | 1 |
| ENSG0000 response | Inflamed | RBP5      | protein_cc chr12 | 7276280  | 7281538  | - | 1369  | 318.2005 | 0        | -0.74911 | 0.211512 | -3.5417  | 0.000608 | 0.004727 | 1 |
| ENSG0000 response | Inflamed | PTRF      | protein_cc chr17 | 40554470 | 40575535 | - | 3828  | 6703.411 | 0        | -0.7343  | 0.207398 | -3.54056 | 0.00061  | 0.004744 | 1 |
| ENSG0000 response | Inflamed | ESRP2     | protein_cc chr16 | 68263014 | 68272005 | - | 5563  | 3787.962 | 0        | 0.717305 | 0.202629 | 3.539987 | 0.000611 | 0.004752 | 1 |
| ENSG0000 response | Inflamed | NAT2      | protein_cc chr8  | 18248755 | 18258728 | + | 1322  | 328.0286 | 0.00716  | 0.856727 | 0.242052 | 3.539433 | 0.000613 | 0.004759 | 1 |
| ENSG0000 response | Inflamed | HSD3B7    | protein_cc chr16 | 30996519 | 31000473 | + | 2504  | 1398.403 | 0        | -0.39696 | 0.112198 | -3.53801 | 0.000616 | 0.004781 | 1 |
| ENSG0000 response | Inflamed | RP11-25K2 | antisense chr1   | 1.61E+08 | 1.62E+08 | + | 553   | 1.754177 | 0.73747  | -0.57061 | 0.16131  | -3.53733 | 0.000617 | 0.00479  | 1 |
| ENSG0000 response | Inflamed | PRSS8     | protein_cc chr16 | 31142756 | 31147083 | - | 3008  | 15466.51 | 0        | 0.727864 | 0.205803 | 3.536709 | 0.000618 | 0.004799 | 1 |
| ENSG0000 response | Inflamed | TAPT1-AS1 | antisense chr4   | 16228286 | 16321763 | + | 4192  | 143.5847 | 0        | 0.42722  | 0.120802 | 3.536533 | 0.000619 | 0.0048   | 1 |
| ENSG0000 response | Inflamed | RP11-455F | antisense chr16  | 30194826 | 30196278 | - | 811   | 40.42482 | 0.00716  | -0.71005 | 0.200808 | -3.53599 | 0.00062  | 0.004808 | 1 |
| ENSG0000 response | Inflamed | B4GALT4   | protein_cc chr3  | 1.19E+08 | 1.19E+08 | - | 7145  | 1668.623 | 0        | 0.532316 | 0.150556 | 3.535667 | 0.00062  | 0.004811 | 1 |
| ENSG0000 response | Inflamed | TRBV5-1   | TR_V_gene chr7   | 1.42E+08 | 1.42E+08 | + | 652   | 42.92124 | 0.004773 | -0.66811 | 0.189    | -3.53499 | 0.000622 | 0.004821 | 1 |
| ENSG0000 response | Inflamed | RP11-647F | antisense chr17  | 72303349 | 72305929 | - | 651   | 2.155131 | 0.458234 | -0.50284 | 0.142248 | -3.53492 | 0.000622 | 0.004821 | 1 |
| ENSG0000 response | Inflamed | PPP1R26   | antisense chr9   | 1.38E+08 | 1.38E+08 | - | 3750  | 168.9069 | 0.00716  | 0.692996 | 0.196062 | 3.53457  | 0.000623 | 0.004825 | 1 |

|                   |          |           |                  |          |          |   |       |          |          |          |          |          |          |          |   |
|-------------------|----------|-----------|------------------|----------|----------|---|-------|----------|----------|----------|----------|----------|----------|----------|---|
| ENSG0000 response | Inflamed | C16orf45  | protein_cc chr16 | 15528152 | 15718885 | + | 3688  | 439.5632 | 0        | -0.57668 | 0.163169 | -3.53423 | 0.000623 | 0.004829 | 1 |
| ENSG0000 response | Inflamed | SYNGR3    | protein_cc chr16 | 2039661  | 2044276  | + | 3420  | 77.47971 | 0        | -0.50296 | 0.142347 | -3.53334 | 0.000625 | 0.004842 | 1 |
| ENSG0000 response | Inflamed | RP11-527L | antisense chr17  | 41991801 | 42000369 | - | 832   | 1.484487 | 0.608592 | -0.3792  | 0.107323 | -3.53328 | 0.000625 | 0.004842 | 1 |
| ENSG0000 response | Inflamed | DENND2C   | protein_cc chr1  | 1.15E+08 | 1.15E+08 | - | 7408  | 63.5895  | 0.002387 | -0.74533 | 0.210977 | -3.53275 | 0.000627 | 0.004848 | 1 |
| ENSG0000 response | Inflamed | HES7      | protein_cc chr17 | 8023908  | 8027410  | - | 1868  | 2.455847 | 0.501193 | -0.57981 | 0.164126 | -3.53272 | 0.000627 | 0.004848 | 1 |
| ENSG0000 response | Inflamed | RP11-695J | antisense chr12  | 14720684 | 14772689 | + | 596   | 38.33652 | 0.01432  | 0.467525 | 0.132371 | 3.531943 | 0.000628 | 0.004859 | 1 |
| ENSG0000 response | Inflamed | MLLT3     | protein_cc chr9  | 20341663 | 20622542 | - | 8129  | 921.2936 | 0        | 0.533942 | 0.151183 | 3.531762 | 0.000629 | 0.00486  | 1 |
| ENSG0000 response | Inflamed | LINC00261 | lincRNA chr20    | 22528309 | 22559280 | - | 5552  | 1972.797 | 0        | 1.111471 | 0.314714 | 3.531686 | 0.000629 | 0.00486  | 1 |
| ENSG0000 response | Inflamed | SOSTDC1   | protein_cc chr7  | 16501106 | 16570205 | - | 2473  | 247.8663 | 0.011933 | 0.973616 | 0.27571  | 3.531309 | 0.00063  | 0.004865 | 1 |
| ENSG0000 response | Inflamed | VAC14     | protein_cc chr16 | 70721342 | 70835064 | - | 8278  | 2679.938 | 0        | -0.26791 | 0.075871 | -3.53112 | 0.00063  | 0.004867 | 1 |
| ENSG0000 response | Inflamed | SYPL2     | protein_cc chr1  | 1.1E+08  | 1.1E+08  | + | 4033  | 45.10501 | 0.019093 | -0.6776  | 0.191914 | -3.53077 | 0.000631 | 0.00487  | 1 |
| ENSG0000 response | Inflamed | IGLV2-33  | IG_V_gene chr22  | 22930626 | 22931145 | + | 398   | 46.97136 | 0.031026 | -0.93115 | 0.263725 | -3.53075 | 0.000631 | 0.00487  | 1 |
| ENSG0000 response | Inflamed | SEC22C    | protein_cc chr3  | 42589461 | 42642572 | - | 8159  | 936.7064 | 0        | -0.40107 | 0.113598 | -3.53058 | 0.000631 | 0.004871 | 1 |
| ENSG0000 response | Inflamed | METTL7AP  | pseudoger chr12  | 52622877 | 52623372 | - | 496   | 0.871122 | 0.754177 | 0.273802 | 0.077553 | 3.530504 | 0.000631 | 0.004871 | 1 |
| ENSG0000 response | Inflamed | FOXA2     | protein_cc chr20 | 22561643 | 22566093 | - | 2603  | 801.2888 | 0.004773 | 0.855404 | 0.242307 | 3.530252 | 0.000632 | 0.004874 | 1 |
| ENSG0000 response | Inflamed | AMPD2     | protein_cc chr1  | 1.1E+08  | 1.1E+08  | + | 6828  | 2088.117 | 0        | -0.42247 | 0.11968  | -3.52997 | 0.000632 | 0.004877 | 1 |
| ENSG0000 response | Inflamed | CACNG6    | protein_cc chr19 | 54495542 | 54515923 | + | 1853  | 7.78043  | 0.188544 | -0.75116 | 0.21281  | -3.52973 | 0.000633 | 0.004879 | 1 |
| ENSG0000 response | Inflamed | RPS4XP7   | pseudoger chr6   | 13521498 | 13522277 | + | 780   | 12.30549 | 0.252983 | 0.788835 | 0.223501 | 3.529454 | 0.000633 | 0.004883 | 1 |
| ENSG0000 response | Inflamed | TUFT1     | protein_cc chr1  | 1.52E+08 | 1.52E+08 | + | 4017  | 1237.852 | 0        | 0.523421 | 0.148311 | 3.529222 | 0.000634 | 0.004885 | 1 |
| ENSG0000 response | Inflamed | MYO5A     | protein_cc chr15 | 52599480 | 52821247 | - | 13007 | 927.4678 | 0        | -0.68787 | 0.194921 | -3.52897 | 0.000635 | 0.004888 | 1 |
| ENSG0000 response | Inflamed | SLC30A10  | protein_cc chr1  | 2.2E+08  | 2.2E+08  | - | 5770  | 837.9093 | 0.011933 | 1.449052 | 0.410652 | 3.528659 | 0.000635 | 0.004891 | 1 |
| ENSG0000 response | Inflamed | GLTPD1    | protein_cc chr1  | 1260136  | 1264277  | + | 2556  | 2895.107 | 0        | 0.300418 | 0.085143 | 3.528398 | 0.000636 | 0.004894 | 1 |
| ENSG0000 response | Inflamed | FOLH1     | protein_cc chr11 | 49168187 | 49230222 | - | 3824  | 124.5274 | 0.02148  | -1.10944 | 0.31444  | -3.52831 | 0.000636 | 0.004894 | 1 |
| ENSG0000 response | Inflamed | CES3      | protein_cc chr16 | 66995140 | 67009051 | + | 4935  | 5811.332 | 0        | 0.92284  | 0.261612 | 3.527509 | 0.000638 | 0.004906 | 1 |
| ENSG0000 response | Inflamed | IL26      | protein_cc chr12 | 68595131 | 68619601 | - | 1075  | 9.575179 | 0.23389  | -0.74808 | 0.212135 | -3.52645 | 0.00064  | 0.004921 | 1 |
| ENSG0000 response | Inflamed | ANKRD35   | protein_cc chr1  | 1.46E+08 | 1.46E+08 | + | 3342  | 69.15036 | 0.002387 | -0.53404 | 0.15144  | -3.52643 | 0.00064  | 0.004921 | 1 |
| ENSG0000 response | Inflamed | SPATC1    | protein_cc chr8  | 1.45E+08 | 1.45E+08 | + | 1954  | 18.34845 | 0.047733 | -0.74552 | 0.211429 | -3.5261  | 0.000641 | 0.004925 | 1 |
| ENSG0000 response | Inflamed | NTRK2     | protein_cc chr9  | 87283466 | 87638505 | + | 16968 | 400.6921 | 0.011933 | 1.348031 | 0.382312 | 3.525996 | 0.000641 | 0.004925 | 1 |
| ENSG0000 response | Inflamed | IL17C     | protein_cc chr16 | 88704999 | 88706881 | + | 1379  | 12.46539 | 0.272076 | -0.93987 | 0.266604 | -3.52535 | 0.000642 | 0.004934 | 1 |
| ENSG0000 response | Inflamed | AE000661  | processed_chr14  | 22849083 | 22951948 | - | 3284  | 9.952267 | 0.116945 | -0.67238 | 0.19073  | -3.52527 | 0.000642 | 0.004934 | 1 |
| ENSG0000 response | Inflamed | IER5L     | protein_cc chr9  | 1.32E+08 | 1.32E+08 | - | 2706  | 591.3103 | 0        | -0.47169 | 0.13381  | -3.52505 | 0.000643 | 0.004936 | 1 |
| ENSG0000 response | Inflamed | RSPO3     | protein_cc chr6  | 1.27E+08 | 1.28E+08 | + | 3179  | 187.6563 | 0.01432  | -1.08982 | 0.3092   | -3.52465 | 0.000644 | 0.004942 | 1 |
| ENSG0000 response | Inflamed | SLC5A11   | protein_cc chr16 | 24857162 | 24922949 | + | 3415  | 38.35322 | 0.152745 | 1.013895 | 0.287695 | 3.5242   | 0.000645 | 0.004946 | 1 |
| ENSG0000 response | Inflamed | RP3-395M  | antisense chr1   | 2512999  | 2515972  | + | 626   | 86.15274 | 0        | 0.42646  | 0.121009 | 3.524198 | 0.000645 | 0.004946 | 1 |
| ENSG0000 response | Inflamed | ZNF768    | protein_cc chr16 | 30535325 | 30538142 | - | 2392  | 2460.971 | 0        | 0.339772 | 0.096422 | 3.523786 | 0.000646 | 0.004951 | 1 |
| ENSG0000 response | Inflamed | IL18R1    | protein_cc chr2  | 1.03E+08 | 1.03E+08 | + | 4336  | 309.5609 | 0        | -0.8417  | 0.238865 | -3.52373 | 0.000646 | 0.004951 | 1 |
| ENSG0000 response | Inflamed | GOT1      | protein_cc chr10 | 1.01E+08 | 1.01E+08 | - | 2648  | 2585.434 | 0        | 0.418018 | 0.118633 | 3.523609 | 0.000646 | 0.004952 | 1 |
| ENSG0000 response | Inflamed | CPA5      | protein_cc chr7  | 1.3E+08  | 1.3E+08  | + | 3058  | 5.011933 | 0.451074 | -0.61897 | 0.175673 | -3.5234  | 0.000646 | 0.004954 | 1 |
| ENSG0000 response | Inflamed | BANK1     | protein_cc chr4  | 1.02E+08 | 1.03E+08 | + | 6144  | 344.4415 | 0.002387 | -1.00905 | 0.286414 | -3.52305 | 0.000647 | 0.004958 | 1 |
| ENSG0000 response | Inflamed | NUDT11    | protein_cc chrX  | 51232863 | 51239448 | - | 2385  | 22.85919 | 0.016706 | -0.61204 | 0.173735 | -3.52283 | 0.000648 | 0.00496  | 1 |

|                   |          |           |            |       |          |          |   |      |          |          |          |          |          |          |          |   |
|-------------------|----------|-----------|------------|-------|----------|----------|---|------|----------|----------|----------|----------|----------|----------|----------|---|
| ENSG0000 response | Inflamed | IGLV4-3   | IG_V_gene  | chr22 | 23213686 | 23214214 | + | 403  | 35.84726 | 0.042959 | -1.01295 | 0.287563 | -3.52253 | 0.000648 | 0.004964 | 1 |
| ENSG0000 response | Inflamed | IGLV7-43  | IG_V_gene  | chr22 | 22749356 | 22749827 | + | 385  | 2570.928 | 0.002387 | -1.1392  | 0.323425 | -3.5223  | 0.000649 | 0.004966 | 1 |
| ENSG0000 response | Inflamed | RP11-327F | sense_intr | chr16 | 50746755 | 50747500 | + | 746  | 12.1432  | 0.114558 | -0.83394 | 0.236785 | -3.52195 | 0.00065  | 0.004971 | 1 |
| ENSG0000 response | Inflamed | HLA-DMA   | protein_cc | chr6  | 32916390 | 32936871 | - | 2534 | 3383.432 | 0        | -0.5139  | 0.14593  | -3.52154 | 0.000651 | 0.004976 | 1 |
| ENSG0000 response | Inflamed | ELL       | protein_cc | chr19 | 18553473 | 18632937 | - | 4929 | 1406.527 | 0        | -0.39411 | 0.11192  | -3.52134 | 0.000651 | 0.004978 | 1 |
| ENSG0000 response | Inflamed | CDH16     | protein_cc | chr16 | 66942025 | 66952887 | - | 3656 | 16.66826 | 0.100239 | 0.937953 | 0.266386 | 3.521034 | 0.000652 | 0.004981 | 1 |
| ENSG0000 response | Inflamed | RP11-390E | antisense  | chr7  | 1.23E+08 | 1.23E+08 | + | 2099 | 237.179  | 0        | 0.505334 | 0.143528 | 3.520818 | 0.000652 | 0.004984 | 1 |
| ENSG0000 response | Inflamed | ANKFN1    | protein_cc | chr17 | 54188319 | 54589020 | + | 6923 | 9.634845 | 0.105012 | 0.70148  | 0.199263 | 3.520377 | 0.000653 | 0.004989 | 1 |
| ENSG0000 response | Inflamed | PPP1R9B   | protein_cc | chr17 | 48211104 | 48227991 | - | 4290 | 4272.162 | 0        | -0.48245 | 0.137056 | -3.52007 | 0.000654 | 0.004993 | 1 |
| ENSG0000 response | Inflamed | RP11-672A | lincRNA    | chr11 | 76365213 | 76367756 | - | 651  | 19.83294 | 0.042959 | -0.61704 | 0.175299 | -3.51991 | 0.000654 | 0.004994 | 1 |
| ENSG0000 response | Inflamed | CD81      | protein_cc | chr11 | 2397407  | 2418649  | + | 7394 | 11928.36 | 0        | -0.41116 | 0.116817 | -3.51974 | 0.000654 | 0.004994 | 1 |
| ENSG0000 response | Inflamed | AHCYL2    | protein_cc | chr7  | 1.29E+08 | 1.29E+08 | + | 6899 | 11921.99 | 0        | 0.728965 | 0.207107 | 3.519742 | 0.000654 | 0.004994 | 1 |
| ENSG0000 response | Inflamed | OR51E1    | protein_cc | chr11 | 4664650  | 4676718  | + | 3614 | 55.79475 | 0.004773 | -0.70932 | 0.201544 | -3.51943 | 0.000655 | 0.004998 | 1 |
| ENSG0000 response | Inflamed | TICAM2    | protein_cc | chr5  | 1.15E+08 | 1.15E+08 | - | 4205 | 14.52983 | 0.040573 | -0.59852 | 0.170074 | -3.51918 | 0.000656 | 0.005001 | 1 |
| ENSG0000 response | Inflamed | RP4-669H  | antisense  | chr20 | 52014199 | 52029448 | - | 3280 | 4.236277 | 0.377088 | 0.583433 | 0.165805 | 3.518798 | 0.000657 | 0.005006 | 1 |
| ENSG0000 response | Inflamed | RP13-20L1 | antisense  | chr17 | 80412149 | 80416397 | - | 456  | 23.01671 | 0.004773 | -0.3439  | 0.09775  | -3.51818 | 0.000658 | 0.005015 | 1 |
| ENSG0000 response | Inflamed | TLR6      | protein_cc | chr4  | 38825336 | 38858438 | - | 6035 | 244.7637 | 0.002387 | -0.81968 | 0.232998 | -3.51799 | 0.000658 | 0.005016 | 1 |
| ENSG0000 response | Inflamed | CNNM1     | protein_cc | chr10 | 1.01E+08 | 1.01E+08 | + | 6413 | 71.97852 | 0.00716  | -0.57389 | 0.163139 | -3.51782 | 0.000659 | 0.005018 | 1 |
| ENSG0000 response | Inflamed | MPC2      | protein_cc | chr1  | 1.68E+08 | 1.68E+08 | - | 2552 | 2377.282 | 0        | 0.366457 | 0.10418  | 3.517545 | 0.000659 | 0.005021 | 1 |
| ENSG0000 response | Inflamed | GALNT8    | protein_cc | chr12 | 4829507  | 4960277  | + | 3231 | 580.1146 | 0.002387 | 1.023344 | 0.290938 | 3.517392 | 0.00066  | 0.005021 | 1 |
| ENSG0000 response | Inflamed | PTGDR     | protein_cc | chr14 | 52734431 | 52743442 | + | 3033 | 367.7757 | 0        | 0.722086 | 0.205292 | 3.517361 | 0.00066  | 0.005021 | 1 |
| ENSG0000 response | Inflamed | ZNF774    | protein_cc | chr15 | 90895477 | 90909324 | + | 5457 | 271.5513 | 0        | 0.63553  | 0.180696 | 3.517123 | 0.00066  | 0.005024 | 1 |
| ENSG0000 response | Inflamed | MANF      | protein_cc | chr3  | 51422478 | 51426828 | + | 2111 | 2922.42  | 0        | -0.40137 | 0.114123 | -3.51702 | 0.00066  | 0.005024 | 1 |
| ENSG0000 response | Inflamed | FKBP1B    | protein_cc | chr2  | 24272571 | 24286551 | + | 1677 | 157.599  | 0        | 0.51448  | 0.146287 | 3.516934 | 0.000661 | 0.005024 | 1 |
| ENSG0000 response | Inflamed | GRASP     | protein_cc | chr12 | 52400724 | 52409673 | + | 2829 | 420.432  | 0        | -0.61938 | 0.176137 | -3.51645 | 0.000662 | 0.00503  | 1 |
| ENSG0000 response | Inflamed | EPS8L3    | protein_cc | chr1  | 1.1E+08  | 1.1E+08  | - | 3453 | 9052.248 | 0        | 0.767304 | 0.218207 | 3.516396 | 0.000662 | 0.00503  | 1 |
| ENSG0000 response | Inflamed | AC007386  | lincRNA    | chr2  | 65128974 | 65132271 | - | 2928 | 13.47494 | 0.042959 | -0.67388 | 0.191662 | -3.51596 | 0.000663 | 0.005034 | 1 |
| ENSG0000 response | Inflamed | RP11-533E | lincRNA    | chr1  | 1.8E+08  | 1.8E+08  | - | 1257 | 5.324582 | 0.097852 | -0.45129 | 0.128356 | -3.51594 | 0.000663 | 0.005034 | 1 |
| ENSG0000 response | Inflamed | RP11-420C | lincRNA    | chr6  | 2854896  | 2881641  | - | 1455 | 64.5895  | 0.002387 | -0.62642 | 0.17817  | -3.51588 | 0.000663 | 0.005034 | 1 |
| ENSG0000 response | Inflamed | RP3-407E4 | pseudoger  | chr6  | 64150671 | 64153485 | + | 968  | 3.245823 | 0.610979 | 0.653396 | 0.185846 | 3.515798 | 0.000663 | 0.005034 | 1 |
| ENSG0000 response | Inflamed | RPL29P30  | pseudoger  | chr15 | 71088936 | 71095027 | - | 946  | 4.661098 | 0.48926  | 0.698606 | 0.198713 | 3.515647 | 0.000663 | 0.005034 | 1 |
| ENSG0000 response | Inflamed | PNPLA7    | protein_cc | chr9  | 1.4E+08  | 1.4E+08  | - | 8971 | 673.8234 | 0        | 0.532244 | 0.151395 | 3.515598 | 0.000664 | 0.005034 | 1 |
| ENSG0000 response | Inflamed | RP11-359C | lincRNA    | chr20 | 22656710 | 22665982 | - | 2781 | 1.446301 | 0.670644 | -0.48765 | 0.138714 | -3.51554 | 0.000664 | 0.005034 | 1 |
| ENSG0000 response | Inflamed | RP11-150C | lincRNA    | chr8  | 37454998 | 37457376 | - | 2379 | 292.463  | 0.00716  | 0.711238 | 0.202343 | 3.515011 | 0.000665 | 0.005041 | 1 |
| ENSG0000 response | Inflamed | SMPD3     | protein_cc | chr16 | 68392231 | 68482591 | - | 7163 | 4773.337 | 0        | 0.689218 | 0.196082 | 3.514953 | 0.000665 | 0.005041 | 1 |
| ENSG0000 response | Inflamed | ZNF385C   | protein_cc | chr17 | 40177594 | 40217383 | - | 5115 | 27.1957  | 0.011933 | 0.57746  | 0.164331 | 3.514008 | 0.000667 | 0.005056 | 1 |
| ENSG0000 response | Inflamed | GP1BA     | protein_cc | chr17 | 4835592  | 4838325  | + | 2501 | 101.9093 | 0.038186 | -1.14944 | 0.327111 | -3.5139  | 0.000667 | 0.005056 | 1 |
| ENSG0000 response | Inflamed | SLC4A3    | protein_cc | chr2  | 2.2E+08  | 2.21E+08 | + | 5091 | 66.55847 | 0.00716  | -0.83524 | 0.237723 | -3.51353 | 0.000668 | 0.005061 | 1 |
| ENSG0000 response | Inflamed | ZNF33B    | processed  | chr10 | 43069633 | 43134016 | - | 2810 | 91.29356 | 0        | 0.374862 | 0.106738 | 3.511984 | 0.000672 | 0.005086 | 1 |
| ENSG0000 response | Inflamed | CLIC4     | protein_cc | chr1  | 25071848 | 25170815 | + | 4495 | 3204.368 | 0        | -0.59317 | 0.16892  | -3.51157 | 0.000673 | 0.005091 | 1 |



|                   |          |           |                  |          |          |   |       |          |          |          |          |          |          |          |   |
|-------------------|----------|-----------|------------------|----------|----------|---|-------|----------|----------|----------|----------|----------|----------|----------|---|
| ENSG0000 response | Inflamed | CXCR5     | protein_cc chr11 | 1.19E+08 | 1.19E+08 | + | 4431  | 478.8067 | 0.002387 | -1.21663 | 0.346481 | -3.51139 | 0.000673 | 0.005093 | 1 |
| ENSG0000 response | Inflamed | SLC26A8   | protein_cc chr6  | 35911291 | 35992645 | - | 6036  | 21.94511 | 0.023866 | -0.90674 | 0.258251 | -3.51108 | 0.000674 | 0.005097 | 1 |
| ENSG0000 response | Inflamed | NAMPTL    | protein_cc chr10 | 36810649 | 36813162 | - | 2514  | 54.81862 | 0.011933 | -0.86336 | 0.245907 | -3.51094 | 0.000674 | 0.005098 | 1 |
| ENSG0000 response | Inflamed | ANXA13    | protein_cc chr8  | 1.25E+08 | 1.25E+08 | - | 3806  | 542.2888 | 0.004773 | 0.902995 | 0.257201 | 3.510853 | 0.000674 | 0.005098 | 1 |
| ENSG0000 response | Inflamed | TRHDE     | protein_cc chr12 | 72481046 | 73059422 | + | 6835  | 118.0095 | 0.016706 | 0.985694 | 0.280764 | 3.510751 | 0.000674 | 0.005098 | 1 |
| ENSG0000 response | Inflamed | LY86      | protein_cc chr6  | 6588341  | 6655216  | + | 1254  | 167.1814 | 0        | -0.58542 | 0.166766 | -3.51042 | 0.000675 | 0.005101 | 1 |
| ENSG0000 response | Inflamed | MARS      | protein_cc chr12 | 57869228 | 57911352 | + | 7028  | 4072.272 | 0        | -0.33513 | 0.09547  | -3.51036 | 0.000675 | 0.005101 | 1 |
| ENSG0000 response | Inflamed | OXCT2P1   | pseudoger chr1   | 39980628 | 39982162 | + | 1535  | 14.24344 | 0.038186 | -0.51572 | 0.146915 | -3.51033 | 0.000675 | 0.005101 | 1 |
| ENSG0000 response | Inflamed | CTD-2509C | lincRNA chr14    | 65703198 | 65785508 | - | 1118  | 9.405728 | 0.138425 | -0.71769 | 0.204469 | -3.51001 | 0.000676 | 0.005105 | 1 |
| ENSG0000 response | Inflamed | CDH15     | protein_cc chr16 | 89238175 | 89261900 | + | 4628  | 9.057279 | 0.069212 | -0.56526 | 0.161059 | -3.50963 | 0.000677 | 0.00511  | 1 |
| ENSG0000 response | Inflamed | ADAMTS3   | protein_cc chr4  | 73146686 | 73434516 | - | 6585  | 44.25537 | 0.019093 | -0.81276 | 0.231587 | -3.50952 | 0.000677 | 0.00511  | 1 |
| ENSG0000 response | Inflamed | AC109642  | lincRNA chr2     | 30569525 | 30575297 | + | 2952  | 11.08592 | 0.066826 | -0.61122 | 0.174197 | -3.50875 | 0.000679 | 0.005122 | 1 |
| ENSG0000 response | Inflamed | LRMP      | protein_cc chr12 | 25173936 | 25261268 | + | 5159  | 529.8831 | 0        | -0.84654 | 0.241301 | -3.50823 | 0.00068  | 0.005129 | 1 |
| ENSG0000 response | Inflamed | GNAS      | protein_cc chr20 | 57414773 | 57486247 | + | 13320 | 27775.6  | 0        | -0.19464 | 0.055494 | -3.50734 | 0.000682 | 0.005143 | 1 |
| ENSG0000 response | Inflamed | GNG11     | protein_cc chr7  | 93551011 | 93557922 | + | 3055  | 617.4153 | 0        | -0.63199 | 0.180205 | -3.50705 | 0.000683 | 0.005147 | 1 |
| ENSG0000 response | Inflamed | ERBB2     | protein_cc chr17 | 37844167 | 37886679 | + | 10321 | 11369.23 | 0        | 0.520993 | 0.148574 | 3.506628 | 0.000684 | 0.005152 | 1 |
| ENSG0000 response | Inflamed | RP11-549E | antisense chr18  | 29265618 | 29266786 | + | 1169  | 59.95704 | 0.002387 | 0.460559 | 0.131345 | 3.506485 | 0.000684 | 0.005153 | 1 |
| ENSG0000 response | Inflamed | CMBL      | protein_cc chr5  | 10275987 | 10308138 | - | 3324  | 4405.444 | 0        | 0.648101 | 0.184843 | 3.50622  | 0.000685 | 0.005156 | 1 |
| ENSG0000 response | Inflamed | ISG20     | protein_cc chr15 | 89179384 | 89199714 | + | 7363  | 2719.723 | 0        | -0.47748 | 0.136184 | -3.50618 | 0.000685 | 0.005156 | 1 |
| ENSG0000 response | Inflamed | VDR       | protein_cc chr12 | 48235320 | 48336831 | - | 5674  | 7265.01  | 0        | 0.461316 | 0.131584 | 3.505863 | 0.000686 | 0.00516  | 1 |
| ENSG0000 response | Inflamed | RP11-669M | lincRNA chr4     | 14166079 | 14244437 | + | 649   | 1.420048 | 0.670644 | -0.48022 | 0.137005 | -3.50515 | 0.000687 | 0.00517  | 1 |
| ENSG0000 response | Inflamed | PPP1R16A  | protein_cc chr8  | 1.46E+08 | 1.46E+08 | + | 5414  | 3708.439 | 0        | 0.363842 | 0.103803 | 3.50511  | 0.000687 | 0.00517  | 1 |
| ENSG0000 response | Inflamed | SH2D6     | protein_cc chr2  | 85645844 | 85664152 | + | 3858  | 130.6062 | 0.011933 | 1.011158 | 0.288492 | 3.504984 | 0.000688 | 0.00517  | 1 |
| ENSG0000 response | Inflamed | AC006129  | lincRNA chr19    | 42041545 | 42043266 | + | 1722  | 62.86158 | 0.002387 | -0.775   | 0.221133 | -3.50465 | 0.000688 | 0.005174 | 1 |
| ENSG0000 response | Inflamed | UAP1L1    | protein_cc chr9  | 1.4E+08  | 1.4E+08  | + | 5283  | 923.5537 | 0        | -0.42199 | 0.120411 | -3.50458 | 0.000688 | 0.005174 | 1 |
| ENSG0000 response | Inflamed | DCHS1     | protein_cc chr11 | 6642556  | 6677085  | - | 10763 | 2574.167 | 0        | -0.63162 | 0.180232 | -3.50446 | 0.000689 | 0.005175 | 1 |
| ENSG0000 response | Inflamed | GIMAP5    | protein_cc chr7  | 1.5E+08  | 1.5E+08  | + | 6031  | 1266.671 | 0        | -0.49823 | 0.142174 | -3.50436 | 0.000689 | 0.005175 | 1 |
| ENSG0000 response | Inflamed | CTD-2521M | lincRNA chr19    | 17516503 | 17529713 | + | 2525  | 228.5895 | 0        | -0.4432  | 0.126497 | -3.50368 | 0.000691 | 0.005185 | 1 |
| ENSG0000 response | Inflamed | ARHGEF10  | protein_cc chr1  | 17866330 | 18024369 | + | 7847  | 4622.119 | 0        | 0.405726 | 0.115823 | 3.502979 | 0.000692 | 0.005196 | 1 |
| ENSG0000 response | Inflamed | KB-1410C5 | lincRNA chr8     | 1.02E+08 | 1.02E+08 | + | 731   | 1.085919 | 0.73031  | 0.329443 | 0.094065 | 3.502311 | 0.000694 | 0.005206 | 1 |
| ENSG0000 response | Inflamed | PHLPP1    | protein_cc chr18 | 60382672 | 60647666 | + | 9153  | 1252.492 | 0        | 0.45733  | 0.130584 | 3.502183 | 0.000694 | 0.005207 | 1 |
| ENSG0000 response | Inflamed | TNFAIP8   | protein_cc chr5  | 1.19E+08 | 1.19E+08 | + | 9591  | 859.2721 | 0        | -0.56667 | 0.161823 | -3.50181 | 0.000695 | 0.005212 | 1 |
| ENSG0000 response | Inflamed | GPR110    | protein_cc chr6  | 46965440 | 47010099 | - | 12401 | 338.3365 | 0.01432  | -1.38901 | 0.396661 | -3.50174 | 0.000695 | 0.005212 | 1 |
| ENSG0000 response | Inflamed | MXRA8     | protein_cc chr1  | 1288069  | 1297157  | - | 3371  | 2146.406 | 0        | -0.66898 | 0.191051 | -3.50159 | 0.000695 | 0.005213 | 1 |
| ENSG0000 response | Inflamed | SNORA67   | processed_chr17  | 7476144  | 7485342  | + | 4554  | 676.3914 | 0        | -0.24108 | 0.068859 | -3.50102 | 0.000697 | 0.005221 | 1 |
| ENSG0000 response | Inflamed | SLC6A12   | protein_cc chr12 | 299243   | 323736   | - | 5683  | 123.6158 | 0.00716  | 0.64497  | 0.184239 | 3.500721 | 0.000697 | 0.005225 | 1 |
| ENSG0000 response | Inflamed | TNN       | protein_cc chr1  | 1.75E+08 | 1.75E+08 | + | 5008  | 26.3747  | 0.026253 | -0.74479 | 0.212773 | -3.50039 | 0.000698 | 0.005228 | 1 |
| ENSG0000 response | Inflamed | EIF3LP2   | pseudoger chr10  | 43062125 | 43062931 | + | 807   | 3.252983 | 0.326969 | 0.443763 | 0.126775 | 3.500388 | 0.000698 | 0.005228 | 1 |
| ENSG0000 response | Inflamed | SV2A      | protein_cc chr1  | 1.5E+08  | 1.5E+08  | - | 4824  | 239.2243 | 0.002387 | -0.62931 | 0.17981  | -3.49988 | 0.000699 | 0.005235 | 1 |
| ENSG0000 response | Inflamed | RAB11FIP1 | protein_cc chr8  | 37716136 | 37756985 | - | 9602  | 10277.99 | 0        | 0.476083 | 0.13605  | 3.499318 | 0.000701 | 0.005243 | 1 |

|                   |          |           |                  |          |          |   |       |          |          |          |          |          |          |          |   |
|-------------------|----------|-----------|------------------|----------|----------|---|-------|----------|----------|----------|----------|----------|----------|----------|---|
| ENSG0000 response | Inflamed | USP2      | protein_cc chr11 | 1.19E+08 | 1.19E+08 | - | 4538  | 1089.535 | 0        | 0.895256 | 0.255863 | 3.498967 | 0.000701 | 0.005248 | 1 |
| ENSG0000 response | Inflamed | CYB5R1    | protein_cc chr1  | 2.03E+08 | 2.03E+08 | - | 4504  | 1018.561 | 0        | -0.26286 | 0.075136 | -3.49848 | 0.000703 | 0.005255 | 1 |
| ENSG0000 response | Inflamed | CYP21A2   | protein_cc chr6  | 32006042 | 32009447 | + | 2909  | 11.39618 | 0.126492 | -0.724   | 0.206984 | -3.49783 | 0.000704 | 0.005264 | 1 |
| ENSG0000 response | Inflamed | AC108004  | miRNA chr17      | 4961     | 5048     | - | 88    | 0.937947 | 0.78043  | -0.39806 | 0.113806 | -3.49773 | 0.000704 | 0.005264 | 1 |
| ENSG0000 response | Inflamed | CLMN      | protein_cc chr14 | 95648277 | 95786243 | - | 15701 | 5691.217 | 0        | 0.591867 | 0.169216 | 3.497697 | 0.000704 | 0.005264 | 1 |
| ENSG0000 response | Inflamed | P2RX4     | protein_cc chr12 | 1.22E+08 | 1.22E+08 | + | 8159  | 2637.043 | 0        | 0.33118  | 0.094712 | 3.496716 | 0.000707 | 0.00528  | 1 |
| ENSG0000 response | Inflamed | CLIP4     | protein_cc chr2  | 29320571 | 29412509 | + | 7775  | 266.0024 | 0.002387 | -0.69049 | 0.197488 | -3.49634 | 0.000708 | 0.005285 | 1 |
| ENSG0000 response | Inflamed | RHOQP1    | pseudoger chr14  | 50066712 | 50067290 | + | 579   | 31.52983 | 0.009547 | 0.470732 | 0.134651 | 3.495952 | 0.000709 | 0.005291 | 1 |
| ENSG0000 response | Inflamed | IL12RB2   | protein_cc chr1  | 67773047 | 67862583 | + | 4233  | 70.55131 | 0.011933 | -0.68581 | 0.196179 | -3.49586 | 0.000709 | 0.005291 | 1 |
| ENSG0000 response | Inflamed | CNPPD1    | protein_cc chr2  | 2.2E+08  | 2.2E+08  | - | 2760  | 4871.174 | 0        | 0.291676 | 0.08344  | 3.495656 | 0.000709 | 0.005293 | 1 |
| ENSG0000 response | Inflamed | RP11-265F | lincRNA chrX     | 39164210 | 39186616 | - | 1773  | 6.48926  | 0.360382 | -0.69476 | 0.198781 | -3.4951  | 0.000711 | 0.005301 | 1 |
| ENSG0000 response | Inflamed | TNFSF13B  | protein_cc chr13 | 1.09E+08 | 1.09E+08 | + | 3059  | 306.4344 | 0        | -0.73126 | 0.209248 | -3.49468 | 0.000712 | 0.005307 | 1 |
| ENSG0000 response | Inflamed | POU2F3    | protein_cc chr11 | 1.2E+08  | 1.2E+08  | + | 6645  | 98.00239 | 0.009547 | 0.826026 | 0.236389 | 3.494345 | 0.000712 | 0.00531  | 1 |
| ENSG0000 response | Inflamed | RP11-415C | lincRNA chr4     | 27219101 | 27283847 | + | 2802  | 1.145585 | 0.75895  | 0.32144  | 0.091989 | 3.494328 | 0.000712 | 0.00531  | 1 |
| ENSG0000 response | Inflamed | SLC44A4   | protein_cc chr6  | 31830969 | 31846823 | - | 3369  | 26353.78 | 0        | 0.71281  | 0.204    | 3.494169 | 0.000713 | 0.005312 | 1 |
| ENSG0000 response | Inflamed | HCG22     | lincRNA chr6     | 31021227 | 31027667 | + | 2183  | 1.591885 | 0.725537 | -0.45834 | 0.131182 | -3.4939  | 0.000713 | 0.005315 | 1 |
| ENSG0000 response | Inflamed | SLC39A13  | protein_cc chr11 | 47428683 | 47438047 | + | 4579  | 1590.06  | 0        | -0.39466 | 0.112982 | -3.49312 | 0.000715 | 0.005327 | 1 |
| ENSG0000 response | Inflamed | KANK3     | protein_cc chr19 | 8387468  | 8408146  | - | 3214  | 316.3031 | 0        | -0.63438 | 0.181639 | -3.49251 | 0.000717 | 0.005336 | 1 |
| ENSG0000 response | Inflamed | PTPRD     | protein_cc chr9  | 8314246  | 10612723 | - | 11081 | 1114.835 | 0        | 0.765151 | 0.219116 | 3.491986 | 0.000718 | 0.005344 | 1 |
| ENSG0000 response | Inflamed | TRAF4     | protein_cc chr17 | 27071002 | 27077974 | + | 4594  | 2934.305 | 0        | 0.261159 | 0.074796 | 3.491623 | 0.000719 | 0.005349 | 1 |
| ENSG0000 response | Inflamed | KAL1      | protein_cc chrX  | 8496915  | 8700227  | - | 7131  | 77.62053 | 0.009547 | -0.73382 | 0.2102   | -3.49105 | 0.00072  | 0.005358 | 1 |
| ENSG0000 response | Inflamed | HEPHL1    | protein_cc chr11 | 93754527 | 93846917 | + | 5345  | 12.4463  | 0.522673 | -1.08699 | 0.311386 | -3.49081 | 0.000721 | 0.005361 | 1 |
| ENSG0000 response | Inflamed | RP11-119I | lincRNA chr11    | 67653948 | 67673821 | + | 3962  | 36.84964 | 0.009547 | 0.746128 | 0.213765 | 3.490409 | 0.000722 | 0.005366 | 1 |
| ENSG0000 response | Inflamed | GPA33     | protein_cc chr1  | 1.67E+08 | 1.67E+08 | - | 3003  | 29157.94 | 0        | 0.91075  | 0.260945 | 3.490198 | 0.000722 | 0.005369 | 1 |
| ENSG0000 response | Inflamed | RP11-345M | lincRNA chr16    | 79750622 | 79804460 | - | 1725  | 6.608592 | 0.171838 | 0.51147  | 0.146583 | 3.489294 | 0.000724 | 0.005383 | 1 |
| ENSG0000 response | Inflamed | STX2      | protein_cc chr12 | 1.31E+08 | 1.31E+08 | - | 3723  | 434.6683 | 0        | -0.66821 | 0.191527 | -3.48886 | 0.000725 | 0.005389 | 1 |
| ENSG0000 response | Inflamed | AC074363  | lincRNA chr2     | 1.68E+08 | 1.68E+08 | + | 462   | 9.823389 | 0.150358 | 0.686548 | 0.196788 | 3.488772 | 0.000726 | 0.005389 | 1 |
| ENSG0000 response | Inflamed | TRIM8     | protein_cc chr10 | 1.04E+08 | 1.04E+08 | + | 2916  | 4075.604 | 0        | -0.37353 | 0.107068 | -3.48873 | 0.000726 | 0.005389 | 1 |
| ENSG0000 response | Inflamed | TNFRSF11  | protein_cc chr18 | 59992520 | 60058516 | + | 8984  | 3536.169 | 0        | 0.619133 | 0.177501 | 3.488054 | 0.000727 | 0.005399 | 1 |
| ENSG0000 response | Inflamed | RP11-163M | lincRNA chr8     | 61297147 | 61429354 | - | 4428  | 16.65394 | 0.031026 | 0.698119 | 0.200157 | 3.487856 | 0.000728 | 0.005401 | 1 |
| ENSG0000 response | Inflamed | RP11-47I2 | protein_cc chr14 | 62037258 | 62125414 | + | 2653  | 15.25537 | 0.031026 | -0.75294 | 0.215878 | -3.48779 | 0.000728 | 0.005401 | 1 |
| ENSG0000 response | Inflamed | A1BG      | protein_cc chr19 | 58856544 | 58864865 | - | 4006  | 8.577566 | 0.073986 | -0.55819 | 0.160051 | -3.4876  | 0.000729 | 0.005403 | 1 |
| ENSG0000 response | Inflamed | ATP5H     | protein_cc chr17 | 73034958 | 73043080 | - | 3231  | 3343.532 | 0        | 0.366889 | 0.105201 | 3.487496 | 0.000729 | 0.005403 | 1 |
| ENSG0000 response | Inflamed | POLR2H    | protein_cc chr3  | 1.84E+08 | 1.84E+08 | + | 3146  | 1840.747 | 0        | 0.283967 | 0.081453 | 3.486263 | 0.000732 | 0.005424 | 1 |
| ENSG0000 response | Inflamed | MT-TA     | Mt_tRNA chrM     | 5587     | 5655     | - | 69    | 6.608592 | 0.126492 | 0.505423 | 0.144982 | 3.486112 | 0.000732 | 0.005425 | 1 |
| ENSG0000 response | Inflamed | AC006126  | lincRNA chr19    | 45741890 | 45748628 | - | 460   | 68.11695 | 0.026253 | -0.77825 | 0.223269 | -3.48569 | 0.000733 | 0.005431 | 1 |
| ENSG0000 response | Inflamed | SDHA      | protein_cc chr5  | 218356   | 256815   | + | 8383  | 10006.33 | 0        | 0.329625 | 0.094575 | 3.485336 | 0.000734 | 0.005436 | 1 |
| ENSG0000 response | Inflamed | UCK2      | protein_cc chr1  | 1.66E+08 | 1.66E+08 | + | 6756  | 2077.363 | 0        | 0.283162 | 0.081247 | 3.4852   | 0.000734 | 0.005437 | 1 |
| ENSG0000 response | Inflamed | GRHL2     | protein_cc chr8  | 1.03E+08 | 1.03E+08 | + | 6060  | 1355.026 | 0.004773 | 0.837922 | 0.24048  | 3.48437  | 0.000736 | 0.005451 | 1 |
| ENSG0000 response | Inflamed | LPAR5     | protein_cc chr12 | 6728001  | 6745613  | - | 3258  | 1411.823 | 0        | 0.408253 | 0.117173 | 3.484179 | 0.000737 | 0.005452 | 1 |

|                   |          |           |               |       |          |          |   |       |          |          |          |          |          |          |          |   |
|-------------------|----------|-----------|---------------|-------|----------|----------|---|-------|----------|----------|----------|----------|----------|----------|----------|---|
| ENSG0000 response | Inflamed | U3        | lincRNA       | chr18 | 24267585 | 24283602 | - | 2598  | 12.73508 | 0.150358 | 0.757801 | 0.217549 | 3.483367 | 0.000739 | 0.005466 | 1 |
| ENSG0000 response | Inflamed | GIMAP6    | protein_cc    | chr7  | 1.5E+08  | 1.5E+08  | - | 3440  | 1309.986 | 0        | -0.50783 | 0.145814 | -3.48274 | 0.00074  | 0.005475 | 1 |
| ENSG0000 response | Inflamed | CTA-250D  | lincRNA       | chr22 | 42318027 | 42319104 | - | 1078  | 182.568  | 0.002387 | -0.98024 | 0.281472 | -3.48256 | 0.000741 | 0.005477 | 1 |
| ENSG0000 response | Inflamed | STAT4     | protein_cc    | chr2  | 1.92E+08 | 1.92E+08 | - | 4250  | 202.1814 | 0        | -0.70441 | 0.202301 | -3.48197 | 0.000742 | 0.005487 | 1 |
| ENSG0000 response | Inflamed | LAD1      | protein_cc    | chr1  | 2.01E+08 | 2.01E+08 | - | 3237  | 9840.57  | 0        | 0.461479 | 0.132564 | 3.481169 | 0.000744 | 0.0055   | 1 |
| ENSG0000 response | Inflamed | ZNF395    | protein_cc    | chr8  | 28203102 | 28260218 | - | 5819  | 1892.22  | 0        | 0.341232 | 0.098073 | 3.479379 | 0.000749 | 0.00553  | 1 |
| ENSG0000 response | Inflamed | RP11-347C | sense_intr    | chr8  | 95962265 | 95963624 | + | 709   | 17.49881 | 0.033413 | -0.73789 | 0.212077 | -3.47934 | 0.000749 | 0.00553  | 1 |
| ENSG0000 response | Inflamed | HRSP12    | protein_cc    | chr8  | 99114572 | 99129469 | - | 1567  | 326.9928 | 0        | 0.405376 | 0.116532 | 3.478662 | 0.000751 | 0.005541 | 1 |
| ENSG0000 response | Inflamed | MIR4477B  | miRNA         | chr9  | 68415308 | 68415388 | + | 81    | 5.188544 | 0.22673  | -0.57874 | 0.166391 | -3.47819 | 0.000752 | 0.005548 | 1 |
| ENSG0000 response | Inflamed | C9orf66   | protein_cc    | chr9  | 213108   | 215893   | - | 2786  | 14.75656 | 0.02148  | -0.48046 | 0.138153 | -3.47774 | 0.000753 | 0.005555 | 1 |
| ENSG0000 response | Inflamed | SERPINB2  | protein_cc    | chr18 | 61538926 | 61571124 | + | 2748  | 16.358   | 0.429594 | -1.32409 | 0.381099 | -3.47439 | 0.000761 | 0.005615 | 1 |
| ENSG0000 response | Inflamed | IRAK3     | protein_cc    | chr12 | 66582659 | 66648402 | + | 10004 | 949.8902 | 0        | -0.80492 | 0.231679 | -3.47428 | 0.000762 | 0.005616 | 1 |
| ENSG0000 response | Inflamed | BCAS1     | protein_cc    | chr20 | 52553316 | 52687304 | - | 9024  | 6182.148 | 0        | 0.854377 | 0.24606  | 3.472228 | 0.000767 | 0.005653 | 1 |
| ENSG0000 response | Inflamed | ZDHHC18   | protein_cc    | chr1  | 27153201 | 27184093 | + | 5436  | 2778.893 | 0        | -0.39931 | 0.11503  | -3.47135 | 0.000769 | 0.005667 | 1 |
| ENSG0000 response | Inflamed | SEMA3B    | processed_chr | 3     | 50304990 | 50314977 | + | 5767  | 3257.847 | 0        | 0.510896 | 0.147184 | 3.471149 | 0.000769 | 0.00567  | 1 |
| ENSG0000 response | Inflamed | LMO4      | protein_cc    | chr1  | 87794151 | 87814606 | + | 5833  | 1948.279 | 0        | -0.33778 | 0.097326 | -3.47064 | 0.000771 | 0.005678 | 1 |
| ENSG0000 response | Inflamed | COX5B     | protein_cc    | chr2  | 98262503 | 98264846 | + | 1441  | 4919.234 | 0        | 0.431216 | 0.124263 | 3.470199 | 0.000772 | 0.005684 | 1 |
| ENSG0000 response | Inflamed | XKR8      | protein_cc    | chr1  | 28285973 | 28294607 | + | 2743  | 632.79   | 0        | -0.28213 | 0.081308 | -3.4699  | 0.000773 | 0.005688 | 1 |
| ENSG0000 response | Inflamed | RP11-284M | lincRNA       | chr1  | 1.11E+08 | 1.11E+08 | - | 3481  | 301.0549 | 0.002387 | -1.00858 | 0.290682 | -3.46971 | 0.000773 | 0.005689 | 1 |
| ENSG0000 response | Inflamed | P2RY1     | protein_cc    | chr3  | 1.53E+08 | 1.53E+08 | + | 3106  | 390.6086 | 0.002387 | 0.906542 | 0.261274 | 3.469701 | 0.000773 | 0.005689 | 1 |
| ENSG0000 response | Inflamed | ADIPOR2   | protein_cc    | chr12 | 1797740  | 1897844  | + | 5878  | 4946.988 | 0        | 0.375507 | 0.108245 | 3.469032 | 0.000775 | 0.0057   | 1 |
| ENSG0000 response | Inflamed | FZD10-AS1 | processed_chr | 12    | 1.31E+08 | 1.31E+08 | - | 5464  | 132.2267 | 0        | -0.61341 | 0.176831 | -3.46893 | 0.000775 | 0.0057   | 1 |
| ENSG0000 response | Inflamed | COLGALT1  | protein_cc    | chr19 | 17666403 | 17693971 | + | 4900  | 5115.785 | 0        | -0.30124 | 0.086841 | -3.46886 | 0.000775 | 0.0057   | 1 |
| ENSG0000 response | Inflamed | SAMHD1    | protein_cc    | chr20 | 35518632 | 35580246 | - | 5214  | 4151.695 | 0        | -0.54074 | 0.155898 | -3.46858 | 0.000776 | 0.005704 | 1 |
| ENSG0000 response | Inflamed | EVC2      | protein_cc    | chr4  | 5544499  | 5711275  | - | 5509  | 122.0525 | 0.002387 | -0.58242 | 0.167929 | -3.46823 | 0.000777 | 0.005709 | 1 |
| ENSG0000 response | Inflamed | MISP      | protein_cc    | chr19 | 751126   | 764319   | + | 2872  | 25611.41 | 0        | 0.752521 | 0.216986 | 3.468059 | 0.000777 | 0.00571  | 1 |
| ENSG0000 response | Inflamed | RTBDN     | protein_cc    | chr19 | 12936292 | 12946242 | - | 2675  | 5.97136  | 0.178998 | 0.581105 | 0.167631 | 3.466572 | 0.000781 | 0.005737 | 1 |
| ENSG0000 response | Inflamed | FAM19A5   | protein_cc    | chr22 | 48885272 | 49246724 | + | 3173  | 83.83532 | 0.004773 | -0.66815 | 0.192757 | -3.46627 | 0.000782 | 0.005741 | 1 |
| ENSG0000 response | Inflamed | BTN1A1    | protein_cc    | chr6  | 26501449 | 26510650 | + | 2895  | 14.48687 | 0.083532 | -0.79382 | 0.22902  | -3.46615 | 0.000782 | 0.005742 | 1 |
| ENSG0000 response | Inflamed | NXPH4     | protein_cc    | chr12 | 57610578 | 57620232 | + | 2150  | 11.2673  | 0.066826 | -0.67127 | 0.193688 | -3.46574 | 0.000783 | 0.005748 | 1 |
| ENSG0000 response | Inflamed | BTBD11    | protein_cc    | chr12 | 1.08E+08 | 1.08E+08 | + | 7924  | 110.0167 | 0.011933 | -0.69199 | 0.19967  | -3.46565 | 0.000784 | 0.005748 | 1 |
| ENSG0000 response | Inflamed | ABCA12    | protein_cc    | chr2  | 2.16E+08 | 2.16E+08 | - | 9416  | 352.5656 | 0.164678 | -1.6183  | 0.466962 | -3.46559 | 0.000784 | 0.005748 | 1 |
| ENSG0000 response | Inflamed | RP11-547I | antisense     | chr1  | 1944652  | 1946969  | - | 1954  | 2.24821  | 0.49642  | -0.47157 | 0.136085 | -3.46529 | 0.000785 | 0.005752 | 1 |
| ENSG0000 response | Inflamed | IL18BP    | protein_cc    | chr11 | 71709587 | 71716761 | + | 4323  | 1142.332 | 0        | -0.35632 | 0.102837 | -3.4649  | 0.000786 | 0.005758 | 1 |
| ENSG0000 response | Inflamed | RP11-757C | antisense     | chr11 | 68708971 | 68710320 | - | 569   | 1.529833 | 0.692124 | -0.50051 | 0.144464 | -3.46458 | 0.000786 | 0.005762 | 1 |
| ENSG0000 response | Inflamed | RP11-644F | protein_cc    | chr12 | 56109820 | 56118487 | + | 3510  | 210.5632 | 0        | 0.59833  | 0.172714 | 3.464292 | 0.000787 | 0.005766 | 1 |
| ENSG0000 response | Inflamed | ST6GAL2   | protein_cc    | chr2  | 1.07E+08 | 1.08E+08 | - | 7708  | 82.48687 | 0.064439 | 1.389037 | 0.400989 | 3.464028 | 0.000788 | 0.005769 | 1 |
| ENSG0000 response | Inflamed | SMIM19    | protein_cc    | chr8  | 42396298 | 42409603 | + | 3323  | 613.6778 | 0        | 0.299852 | 0.086563 | 3.463981 | 0.000788 | 0.005769 | 1 |
| ENSG0000 response | Inflamed | MIR196A1  | miRNA         | chr17 | 46709852 | 46709921 | - | 70    | 33.28878 | 0.057279 | 0.791136 | 0.22841  | 3.463661 | 0.000789 | 0.005773 | 1 |
| ENSG0000 response | Inflamed | UGT1A7    | protein_cc    | chr2  | 2.35E+08 | 2.35E+08 | + | 4167  | 5.799523 | 0.324582 | 0.61934  | 0.178854 | 3.462828 | 0.000791 | 0.005788 | 1 |

|                   |          |           |                  |          |            |       |          |          |          |          |          |          |          |   |
|-------------------|----------|-----------|------------------|----------|------------|-------|----------|----------|----------|----------|----------|----------|----------|---|
| ENSG0000 response | Inflamed | ABTB1     | protein_cc chr3  | 1.27E+08 | 1.27E+08 + | 6154  | 1571.014 | 0        | -0.44504 | 0.128524 | -3.46274 | 0.000791 | 0.005788 | 1 |
| ENSG0000 response | Inflamed | PIK3CG    | protein_cc chr7  | 1.07E+08 | 1.07E+08 + | 5930  | 557.2578 | 0        | -0.74649 | 0.21559  | -3.46252 | 0.000792 | 0.00579  | 1 |
| ENSG0000 response | Inflamed | C21orf33  | protein_cc chr21 | 45553487 | 45565605 + | 3108  | 2987.403 | 0        | 0.225641 | 0.065172 | 3.462234 | 0.000793 | 0.005794 | 1 |
| ENSG0000 response | Inflamed | GBA3      | polymorpt chr4   | 22694537 | 22821198 + | 2932  | 303.1289 | 0.00716  | 1.214139 | 0.35084  | 3.460661 | 0.000797 | 0.005822 | 1 |
| ENSG0000 response | Inflamed | TMEM63C   | protein_cc chr14 | 77582911 | 77725838 + | 6363  | 386.6134 | 0.004773 | 0.891447 | 0.257597 | 3.460633 | 0.000797 | 0.005822 | 1 |
| ENSG0000 response | Inflamed | OR4C6     | protein_cc chr11 | 55432614 | 55433671 + | 1058  | 2.038186 | 0.606205 | -0.58453 | 0.168936 | -3.46005 | 0.000798 | 0.005831 | 1 |
| ENSG0000 response | Inflamed | IDO1      | protein_cc chr8  | 39759794 | 39785963 + | 3261  | 1476.635 | 0        | -1.40047 | 0.404767 | -3.45994 | 0.000799 | 0.005832 | 1 |
| ENSG0000 response | Inflamed | MIR142    | antisense chr17  | 56408245 | 56409869 - | 1625  | 464.5489 | 0        | -0.77766 | 0.224843 | -3.45868 | 0.000802 | 0.005855 | 1 |
| ENSG0000 response | Inflamed | RP4-798A1 | pseudoger chr1   | 1.71E+08 | 1.71E+08 + | 232   | 6.732697 | 0.202864 | 0.589282 | 0.170394 | 3.458359 | 0.000803 | 0.005858 | 1 |
| ENSG0000 response | Inflamed | STAR      | protein_cc chr8  | 38001167 | 38008783 - | 3767  | 8.210024 | 0.27685  | -0.78568 | 0.227189 | -3.45827 | 0.000803 | 0.005858 | 1 |
| ENSG0000 response | Inflamed | RTN4RL2   | protein_cc chr11 | 57228022 | 57245007 + | 2387  | 39.36754 | 0.009547 | -0.57296 | 0.16568  | -3.45825 | 0.000803 | 0.005858 | 1 |
| ENSG0000 response | Inflamed | LCMT1     | protein_cc chr16 | 25123050 | 25189552 + | 2606  | 1120.351 | 0        | 0.244771 | 0.070781 | 3.458129 | 0.000803 | 0.005859 | 1 |
| ENSG0000 response | Inflamed | CSF1R     | protein_cc chr5  | 1.49E+08 | 1.49E+08 - | 5151  | 5543.723 | 0        | -0.47151 | 0.136371 | -3.45753 | 0.000805 | 0.005868 | 1 |
| ENSG0000 response | Inflamed | SLC1A7    | protein_cc chr1  | 53552855 | 53608289 - | 4237  | 78.70883 | 0.047733 | 1.071005 | 0.309765 | 3.457475 | 0.000805 | 0.005868 | 1 |
| ENSG0000 response | Inflamed | DKK3      | protein_cc chr11 | 11984653 | 12031316 - | 5059  | 2608.752 | 0        | -0.63027 | 0.182296 | -3.45739 | 0.000805 | 0.005868 | 1 |
| ENSG0000 response | Inflamed | CD70      | protein_cc chr19 | 6583194  | 6604114 -  | 1532  | 51.59666 | 0.026253 | -0.96976 | 0.280502 | -3.45722 | 0.000806 | 0.00587  | 1 |
| ENSG0000 response | Inflamed | BHLHE40   | protein_cc chr3  | 5020801  | 5027008 +  | 3837  | 5131.451 | 0        | -0.44841 | 0.129716 | -3.45687 | 0.000807 | 0.005875 | 1 |
| ENSG0000 response | Inflamed | MXI1      | protein_cc chr10 | 1.12E+08 | 1.12E+08 + | 4607  | 2496.305 | 0        | 0.631553 | 0.182717 | 3.456456 | 0.000808 | 0.005881 | 1 |
| ENSG0000 response | Inflamed | RP11-276t | antisense chr1   | 16481706 | 16483824 + | 904   | 52.90215 | 0.004773 | 0.565749 | 0.163681 | 3.456418 | 0.000808 | 0.005881 | 1 |
| ENSG0000 response | Inflamed | AGAP2-AS  | protein_cc chr12 | 58120054 | 58122139 + | 1500  | 225.1862 | 0        | -0.42626 | 0.123332 | -3.45623 | 0.000808 | 0.005883 | 1 |
| ENSG0000 response | Inflamed | TOB1      | protein_cc chr17 | 48939584 | 48945339 - | 2521  | 2746.671 | 0        | 0.408811 | 0.118292 | 3.455949 | 0.000809 | 0.005886 | 1 |
| ENSG0000 response | Inflamed | RHOBTB2   | protein_cc chr8  | 22844930 | 22877712 + | 6580  | 962.7375 | 0        | -0.47595 | 0.137764 | -3.45478 | 0.000812 | 0.005908 | 1 |
| ENSG0000 response | Inflamed | LEF1-AS1  | processed_chr4   | 1.09E+08 | 1.09E+08 + | 4799  | 9.637232 | 0.059666 | -0.47908 | 0.13869  | -3.4543  | 0.000814 | 0.005915 | 1 |
| ENSG0000 response | Inflamed | RP3-512B1 | antisense chr6   | 7540684  | 7541571 -  | 888   | 26.42005 | 0        | 0.45141  | 0.130695 | 3.453924 | 0.000815 | 0.005921 | 1 |
| ENSG0000 response | Inflamed | GATA3     | protein_cc chr10 | 8095567  | 8117161 +  | 3253  | 126.389  | 0.004773 | -0.53522 | 0.154978 | -3.4535  | 0.000816 | 0.005928 | 1 |
| ENSG0000 response | Inflamed | PHLDA1    | protein_cc chr12 | 76419227 | 76427712 - | 8069  | 2641.68  | 0        | -0.79049 | 0.228967 | -3.45242 | 0.000819 | 0.005947 | 1 |
| ENSG0000 response | Inflamed | FCGR1C    | pseudoger chr1   | 1.49E+08 | 1.49E+08 + | 2167  | 13.77566 | 0.140811 | -0.85001 | 0.246236 | -3.452   | 0.00082  | 0.005954 | 1 |
| ENSG0000 response | Inflamed | POPDC2    | protein_cc chr3  | 1.19E+08 | 1.19E+08 - | 2445  | 68.47017 | 0        | -0.41935 | 0.121495 | -3.45161 | 0.000821 | 0.00596  | 1 |
| ENSG0000 response | Inflamed | RP11-359E | lincRNA chr11    | 19732480 | 19734165 - | 1686  | 4.856802 | 0.281623 | -0.65335 | 0.189343 | -3.4506  | 0.000824 | 0.005978 | 1 |
| ENSG0000 response | Inflamed | MGAM      | protein_cc chr7  | 1.42E+08 | 1.42E+08 + | 10767 | 642.1169 | 0.002387 | -1.27003 | 0.368079 | -3.45042 | 0.000824 | 0.005979 | 1 |
| ENSG0000 response | Inflamed | LPL       | protein_cc chr8  | 19759228 | 19824769 + | 4382  | 214.8019 | 0.00716  | -0.79362 | 0.230009 | -3.45037 | 0.000824 | 0.005979 | 1 |
| ENSG0000 response | Inflamed | AP000569  | lincRNA chr21    | 35339403 | 35340874 - | 591   | 2.159905 | 0.536993 | -0.44205 | 0.128128 | -3.45008 | 0.000825 | 0.005984 | 1 |
| ENSG0000 response | Inflamed | MAPKAPK1  | protein_cc chr12 | 1.12E+08 | 1.12E+08 + | 5576  | 1320.215 | 0        | 0.303841 | 0.088073 | 3.44989  | 0.000826 | 0.005986 | 1 |
| ENSG0000 response | Inflamed | WNT11     | protein_cc chr11 | 75897369 | 75921780 - | 2401  | 70.54893 | 0.002387 | 0.826179 | 0.239507 | 3.449501 | 0.000827 | 0.005991 | 1 |
| ENSG0000 response | Inflamed | IGKV2-26  | IG_V_pseu chr2   | 89495584 | 89496317 - | 343   | 31.88305 | 0.047733 | -0.88773 | 0.257354 | -3.44945 | 0.000827 | 0.005991 | 1 |
| ENSG0000 response | Inflamed | SULF1     | protein_cc chr8  | 70378859 | 70573150 + | 9404  | 1649.8   | 0        | -0.72971 | 0.211578 | -3.44889 | 0.000828 | 0.006001 | 1 |
| ENSG0000 response | Inflamed | PIP5KL1   | protein_cc chr9  | 1.31E+08 | 1.31E+08 - | 3341  | 20.29356 | 0.009547 | -0.47725 | 0.138389 | -3.44861 | 0.000829 | 0.006004 | 1 |
| ENSG0000 response | Inflamed | INHBE     | protein_cc chr12 | 57846106 | 57853063 + | 3015  | 4.968974 | 0.315036 | -0.71899 | 0.20849  | -3.44854 | 0.000829 | 0.006004 | 1 |
| ENSG0000 response | Inflamed | GCM1      | protein_cc chr6  | 52991762 | 53013627 - | 2765  | 2.455847 | 0.544153 | -0.52528 | 0.152348 | -3.44792 | 0.000831 | 0.006013 | 1 |
| ENSG0000 response | Inflamed | GJD3      | protein_cc chr17 | 38517235 | 38520067 - | 1044  | 71.4463  | 0.00716  | -0.66926 | 0.194108 | -3.44789 | 0.000831 | 0.006013 | 1 |

|                   |          |           |                  |          |          |   |       |          |          |          |          |          |          |          |   |
|-------------------|----------|-----------|------------------|----------|----------|---|-------|----------|----------|----------|----------|----------|----------|----------|---|
| ENSG0000 response | Inflamed | ASB13     | protein_cc chr10 | 5680830  | 5708558  | - | 3003  | 1431.06  | 0        | 0.380752 | 0.110432 | 3.44783  | 0.000831 | 0.006013 | 1 |
| ENSG0000 response | Inflamed | LPCAT4    | protein_cc chr15 | 34651106 | 34659479 | - | 3781  | 5116.227 | 0        | 0.313245 | 0.090869 | 3.4472   | 0.000833 | 0.006024 | 1 |
| ENSG0000 response | Inflamed | ADAMTS7   | protein_cc chr15 | 79051545 | 79103773 | - | 7730  | 647.8091 | 0        | -0.63371 | 0.183855 | -3.4468  | 0.000834 | 0.00603  | 1 |
| ENSG0000 response | Inflamed | ADAMTS9   | protein_cc chr3  | 64501333 | 64673676 | - | 10693 | 1088.647 | 0        | -0.75234 | 0.218308 | -3.44623 | 0.000836 | 0.00604  | 1 |
| ENSG0000 response | Inflamed | FAM225B   | lincRNA chr9     | 1.16E+08 | 1.16E+08 | - | 7407  | 17.09308 | 0.026253 | -0.60333 | 0.175077 | -3.44606 | 0.000836 | 0.006042 | 1 |
| ENSG0000 response | Inflamed | CTD-2545I | lincRNA chr19    | 50990067 | 50990895 | - | 626   | 7.434368 | 0.181384 | -0.72251 | 0.209711 | -3.44527 | 0.000838 | 0.006056 | 1 |
| ENSG0000 response | Inflamed | NMB       | protein_cc chr15 | 85198360 | 85201794 | - | 1022  | 88.13604 | 0        | -0.48831 | 0.141753 | -3.44482 | 0.00084  | 0.006063 | 1 |
| ENSG0000 response | Inflamed | RP11-588k | sense_ove chr4   | 1.57E+08 | 1.57E+08 | + | 2615  | 149.6587 | 0.009547 | -0.98551 | 0.28619  | -3.44355 | 0.000843 | 0.006087 | 1 |
| ENSG0000 response | Inflamed | AC005355  | lincRNA chr5     | 1.34E+08 | 1.34E+08 | + | 1107  | 200.5967 | 0.004773 | 0.639862 | 0.18585  | 3.442895 | 0.000845 | 0.006099 | 1 |
| ENSG0000 response | Inflamed | LNx1      | protein_cc chr4  | 54325468 | 54567572 | - | 5725  | 482.5131 | 0        | 0.587776 | 0.170728 | 3.44277  | 0.000845 | 0.006099 | 1 |
| ENSG0000 response | Inflamed | ZSWIM5    | protein_cc chr1  | 45482071 | 45771881 | - | 6046  | 778.2601 | 0        | 0.597188 | 0.173464 | 3.442713 | 0.000845 | 0.006099 | 1 |
| ENSG0000 response | Inflamed | PTPN3     | protein_cc chr9  | 1.12E+08 | 1.12E+08 | - | 10071 | 2146.093 | 0        | 0.568125 | 0.165046 | 3.442213 | 0.000847 | 0.006107 | 1 |
| ENSG0000 response | Inflamed | RP13-870I | lincRNA chr11    | 1049880  | 1055284  | + | 629   | 37.91885 | 0.009547 | 0.623634 | 0.181196 | 3.441773 | 0.000848 | 0.006114 | 1 |
| ENSG0000 response | Inflamed | IGHD      | IG_C_gene chr14  | 1.06E+08 | 1.06E+08 | - | 1678  | 660.8711 | 0.00716  | -1.39828 | 0.406293 | -3.44156 | 0.000849 | 0.006117 | 1 |
| ENSG0000 response | Inflamed | MGAT5B    | protein_cc chr17 | 74864538 | 74946475 | + | 6386  | 32.90215 | 0.026253 | -0.82714 | 0.24035  | -3.4414  | 0.000849 | 0.006118 | 1 |
| ENSG0000 response | Inflamed | FLT3      | protein_cc chr13 | 28577411 | 28674729 | - | 4168  | 63.21241 | 0.009547 | -0.69706 | 0.202554 | -3.44134 | 0.000849 | 0.006118 | 1 |
| ENSG0000 response | Inflamed | AP001471  | antisense chr21  | 47513178 | 47517444 | - | 672   | 3.825776 | 0.291169 | -0.5625  | 0.163462 | -3.44115 | 0.00085  | 0.00612  | 1 |
| ENSG0000 response | Inflamed | RP11-12A2 | pseudoger chr6   | 1.4E+08  | 1.4E+08  | + | 1473  | 2.794749 | 0.553699 | -0.58991 | 0.171466 | -3.44038 | 0.000852 | 0.006134 | 1 |
| ENSG0000 response | Inflamed | RRAS2     | protein_cc chr11 | 14299472 | 14386052 | - | 3467  | 689.8138 | 0        | 0.335029 | 0.097383 | 3.440329 | 0.000852 | 0.006134 | 1 |
| ENSG0000 response | Inflamed | KCNK1     | protein_cc chr1  | 2.34E+08 | 2.34E+08 | + | 3542  | 1338.086 | 0        | 0.542631 | 0.157733 | 3.440188 | 0.000852 | 0.006135 | 1 |
| ENSG0000 response | Inflamed | MTMR8     | protein_cc chrX  | 63444187 | 63615333 | - | 3813  | 63.94749 | 0.004773 | 0.557637 | 0.162104 | 3.439986 | 0.000853 | 0.006137 | 1 |
| ENSG0000 response | Inflamed | AC017074  | lincRNA chr2     | 1.14E+08 | 1.14E+08 | - | 561   | 53.1074  | 0.00716  | 0.441622 | 0.128399 | 3.439438 | 0.000855 | 0.006147 | 1 |
| ENSG0000 response | Inflamed | LGALS3    | protein_cc chr14 | 55590828 | 55612126 | + | 2392  | 42441.57 | 0        | 0.473876 | 0.137786 | 3.439213 | 0.000855 | 0.006149 | 1 |
| ENSG0000 response | Inflamed | MMRN2     | protein_cc chr10 | 88695297 | 88729238 | - | 5334  | 1468.589 | 0        | -0.71786 | 0.208747 | -3.43892 | 0.000856 | 0.006153 | 1 |
| ENSG0000 response | Inflamed | SLC25A3   | protein_cc chr12 | 98987369 | 98995946 | + | 4685  | 16162.68 | 0        | 0.238107 | 0.069239 | 3.438893 | 0.000856 | 0.006153 | 1 |
| ENSG0000 response | Inflamed | SHANK3    | protein_cc chr22 | 51112843 | 51171726 | + | 7515  | 1414.718 | 0        | -0.74838 | 0.217641 | -3.43859 | 0.000857 | 0.006157 | 1 |
| ENSG0000 response | Inflamed | RP11-120k | sense_intr chr13 | 1.14E+08 | 1.14E+08 | + | 649   | 3.572792 | 0.334129 | 0.508772 | 0.147993 | 3.437804 | 0.000859 | 0.006171 | 1 |
| ENSG0000 response | Inflamed | CTD-2319I | processed_chr17  | 58160927 | 58169246 | - | 1099  | 52.40095 | 0.002387 | -0.74217 | 0.215927 | -3.43711 | 0.000861 | 0.006184 | 1 |
| ENSG0000 response | Inflamed | MAP3K7Cl  | protein_cc chr21 | 30449792 | 30548210 | + | 4497  | 96.00716 | 0.002387 | -0.5592  | 0.162697 | -3.43704 | 0.000861 | 0.006184 | 1 |
| ENSG0000 response | Inflamed | CHST4     | protein_cc chr16 | 71559136 | 71572649 | + | 2669  | 23.27446 | 0.365155 | -1.21327 | 0.35304  | -3.43663 | 0.000862 | 0.00619  | 1 |
| ENSG0000 response | Inflamed | RP11-297I | lincRNA chr16    | 67464570 | 67465367 | - | 475   | 2.362768 | 0.47494  | 0.442362 | 0.128754 | 3.435704 | 0.000865 | 0.006207 | 1 |
| ENSG0000 response | Inflamed | NDUFS4    | protein_cc chr5  | 52856463 | 52979168 | + | 1174  | 861.8234 | 0        | 0.373397 | 0.108691 | 3.435389 | 0.000866 | 0.006212 | 1 |
| ENSG0000 response | Inflamed | MT-TW     | Mt_tRNA chrM     | 5512     | 5579     | + | 68    | 19.23628 | 0.422434 | 0.690925 | 0.201157 | 3.434747 | 0.000868 | 0.006224 | 1 |
| ENSG0000 response | Inflamed | MRPL48    | protein_cc chr11 | 73498361 | 73576178 | + | 4386  | 553.0644 | 0        | 0.303555 | 0.088382 | 3.434597 | 0.000868 | 0.006225 | 1 |
| ENSG0000 response | Inflamed | C9orf50   | protein_cc chr9  | 1.32E+08 | 1.32E+08 | - | 1620  | 2.427208 | 0.398568 | -0.45702 | 0.133076 | -3.43426 | 0.000869 | 0.00623  | 1 |
| ENSG0000 response | Inflamed | RUFY4     | protein_cc chr2  | 2.19E+08 | 2.19E+08 | + | 4357  | 51.49881 | 0.01432  | -0.82054 | 0.238946 | -3.434   | 0.00087  | 0.006234 | 1 |
| ENSG0000 response | Inflamed | RP11-561C | antisense chr9   | 70843567 | 70844228 | + | 340   | 1        | 0.747017 | -0.34714 | 0.101103 | -3.43353 | 0.000871 | 0.006242 | 1 |
| ENSG0000 response | Inflamed | FAM160A2  | protein_cc chr11 | 6232565  | 6255941  | - | 4736  | 5210.124 | 0        | 0.426168 | 0.124126 | 3.43335  | 0.000872 | 0.006244 | 1 |
| ENSG0000 response | Inflamed | TRNAU1Af  | protein_cc chr1  | 28879597 | 28905051 | + | 4305  | 426.3031 | 0        | -0.22018 | 0.064133 | -3.43323 | 0.000872 | 0.006245 | 1 |
| ENSG0000 response | Inflamed | UQCRH     | protein_cc chr1  | 46769303 | 46782448 | + | 1408  | 3396.229 | 0        | 0.376319 | 0.109643 | 3.432235 | 0.000875 | 0.006263 | 1 |

|                   |          |           |                  |          |          |   |      |          |          |          |          |          |          |          |   |
|-------------------|----------|-----------|------------------|----------|----------|---|------|----------|----------|----------|----------|----------|----------|----------|---|
| ENSG0000 response | Inflamed | AIM2      | protein_cc chr1  | 1.59E+08 | 1.59E+08 | - | 2009 | 143.7542 | 0        | -0.82613 | 0.240743 | -3.43156 | 0.000877 | 0.006275 | 1 |
| ENSG0000 response | Inflamed | STXBP5-AS | antisense chr6   | 1.47E+08 | 1.48E+08 | - | 6011 | 104.9141 | 0        | 0.708076 | 0.206369 | 3.431112 | 0.000878 | 0.006283 | 1 |
| ENSG0000 response | Inflamed | FGF1      | protein_cc chr5  | 1.42E+08 | 1.42E+08 | - | 5051 | 25.06205 | 0.02148  | -0.73935 | 0.215574 | -3.42969 | 0.000882 | 0.006311 | 1 |
| ENSG0000 response | Inflamed | PRR15L    | protein_cc chr17 | 46029333 | 46035244 | - | 1519 | 6705.998 | 0        | 0.764434 | 0.222902 | 3.429466 | 0.000883 | 0.006314 | 1 |
| ENSG0000 response | Inflamed | MAP4K2    | protein_cc chr11 | 64556290 | 64570713 | - | 3745 | 671.852  | 0        | -0.35791 | 0.104381 | -3.42889 | 0.000885 | 0.006324 | 1 |
| ENSG0000 response | Inflamed | NDUFA10   | protein_cc chr2  | 2.41E+08 | 2.41E+08 | - | 9516 | 3617.881 | 0        | 0.303815 | 0.088627 | 3.427998 | 0.000887 | 0.006341 | 1 |
| ENSG0000 response | Inflamed | HTR3E     | protein_cc chr3  | 1.84E+08 | 1.84E+08 | + | 2523 | 37.87589 | 0.114558 | 0.981197 | 0.286255 | 3.427699 | 0.000888 | 0.006345 | 1 |
| ENSG0000 response | Inflamed | HCN3      | protein_cc chr1  | 1.55E+08 | 1.55E+08 | + | 4121 | 418.8401 | 0        | 0.539941 | 0.157544 | 3.427248 | 0.00089  | 0.006353 | 1 |
| ENSG0000 response | Inflamed | LGALS9    | protein_cc chr17 | 25956824 | 25976586 | + | 5714 | 8478.255 | 0        | 0.278015 | 0.081121 | 3.427149 | 0.00089  | 0.006353 | 1 |
| ENSG0000 response | Inflamed | SCARF1    | protein_cc chr17 | 1537152  | 1549041  | - | 4957 | 924.1241 | 0        | -0.60455 | 0.176409 | -3.42699 | 0.00089  | 0.006355 | 1 |
| ENSG0000 response | Inflamed | C15orf39  | protein_cc chr15 | 75487984 | 75504510 | + | 5812 | 3330.702 | 0        | -0.39896 | 0.116433 | -3.42654 | 0.000892 | 0.006363 | 1 |
| ENSG0000 response | Inflamed | PRKCH     | protein_cc chr14 | 61654277 | 62017694 | + | 8809 | 840.1981 | 0        | -0.5161  | 0.150623 | -3.42644 | 0.000892 | 0.006363 | 1 |
| ENSG0000 response | Inflamed | CTB-133G  | protein_cc chr19 | 7413848  | 7448271  | + | 1558 | 62.70406 | 0.038186 | -0.92664 | 0.270465 | -3.42611 | 0.000893 | 0.006368 | 1 |
| ENSG0000 response | Inflamed | EBP       | protein_cc chrX  | 48379546 | 48387104 | + | 2409 | 1581.253 | 0        | 0.34634  | 0.101104 | 3.425585 | 0.000894 | 0.006378 | 1 |
| ENSG0000 response | Inflamed | ALDH18A1  | protein_cc chr10 | 97365696 | 97416463 | - | 3756 | 6424.585 | 0        | 0.410554 | 0.119874 | 3.424887 | 0.000896 | 0.00639  | 1 |
| ENSG0000 response | Inflamed | PABPC5    | protein_cc chrX  | 90689594 | 90693583 | + | 3450 | 17.73508 | 0.02864  | -0.55557 | 0.162221 | -3.42478 | 0.000897 | 0.006391 | 1 |
| ENSG0000 response | Inflamed | RP1-224A  | lincRNA chr1     | 22350487 | 22351461 | - | 615  | 1.74463  | 0.534606 | -0.38405 | 0.11215  | -3.42447 | 0.000898 | 0.006396 | 1 |
| ENSG0000 response | Inflamed | SOX11     | protein_cc chr2  | 5832799  | 5841516  | + | 8718 | 5.451074 | 0.634845 | -0.95756 | 0.279676 | -3.42382 | 0.0009   | 0.006408 | 1 |
| ENSG0000 response | Inflamed | LINC0039C | lincRNA chr13    | 44680514 | 44711372 | - | 340  | 2.610979 | 0.441527 | 0.485127 | 0.141713 | 3.423298 | 0.000901 | 0.006417 | 1 |
| ENSG0000 response | Inflamed | FAM201A   | antisense chr9   | 38620471 | 38624987 | + | 3847 | 91.12411 | 0.004773 | 0.667107 | 0.194883 | 3.423111 | 0.000902 | 0.006419 | 1 |
| ENSG0000 response | Inflamed | TFCP2L1   | protein_cc chr2  | 1.22E+08 | 1.22E+08 | - | 9372 | 7500.418 | 0        | 0.817922 | 0.238979 | 3.42257  | 0.000903 | 0.006429 | 1 |
| ENSG0000 response | Inflamed | FAM53C    | protein_cc chr5  | 1.38E+08 | 1.38E+08 | + | 7049 | 2045.42  | 0        | -0.33567 | 0.09809  | -3.42211 | 0.000905 | 0.006437 | 1 |
| ENSG0000 response | Inflamed | ANKDD1A   | protein_cc chr15 | 65204101 | 65251042 | + | 5018 | 143.6062 | 0.002387 | -0.69284 | 0.202464 | -3.42202 | 0.000905 | 0.006437 | 1 |
| ENSG0000 response | Inflamed | RIN3      | protein_cc chr14 | 92980118 | 93155339 | + | 8683 | 1807.692 | 0        | -0.35884 | 0.104867 | -3.42184 | 0.000905 | 0.006439 | 1 |
| ENSG0000 response | Inflamed | CCBE1     | protein_cc chr18 | 57098172 | 57364612 | - | 6577 | 95.87589 | 0.026253 | -1.12886 | 0.329986 | -3.42094 | 0.000908 | 0.006456 | 1 |
| ENSG0000 response | Inflamed | AC013474  | pseudoger chr2   | 1.27E+08 | 1.27E+08 | + | 799  | 2.71599  | 0.422434 | -0.51223 | 0.149744 | -3.42071 | 0.000909 | 0.006459 | 1 |
| ENSG0000 response | Inflamed | SEC13     | protein_cc chr3  | 10334815 | 10362862 | - | 5446 | 4716.893 | 0        | -0.19725 | 0.057666 | -3.42051 | 0.000909 | 0.006462 | 1 |
| ENSG0000 response | Inflamed | RP11-396C | lincRNA chr11    | 15723509 | 15780444 | - | 993  | 83.0716  | 0.097852 | 1.171802 | 0.342595 | 3.420368 | 0.00091  | 0.006463 | 1 |
| ENSG0000 response | Inflamed | COL6A6    | protein_cc chr3  | 1.3E+08  | 1.3E+08  | + | 9733 | 19.13604 | 0.396181 | -1.23272 | 0.360479 | -3.41967 | 0.000912 | 0.006476 | 1 |
| ENSG0000 response | Inflamed | CTD-2207C | protein_cc chr19 | 7445850  | 7535131  | + | 3342 | 2.147971 | 0.587112 | -0.47495 | 0.138922 | -3.41881 | 0.000915 | 0.006492 | 1 |
| ENSG0000 response | Inflamed | HSPA13    | protein_cc chr21 | 15743436 | 15755805 | - | 4194 | 739.7303 | 0.002387 | -0.62301 | 0.182232 | -3.41876 | 0.000915 | 0.006492 | 1 |
| ENSG0000 response | Inflamed | CD28      | protein_cc chr2  | 2.05E+08 | 2.05E+08 | + | 4885 | 262.3126 | 0.002387 | -0.78504 | 0.229673 | -3.41806 | 0.000917 | 0.006505 | 1 |
| ENSG0000 response | Inflamed | GSR       | protein_cc chr8  | 30535583 | 30585443 | - | 3232 | 4680.563 | 0        | 0.30954  | 0.090598 | 3.416638 | 0.000921 | 0.006534 | 1 |
| ENSG0000 response | Inflamed | ACOT13    | protein_cc chr6  | 24667263 | 24705293 | + | 4394 | 859.2864 | 0        | 0.418059 | 0.122373 | 3.416275 | 0.000922 | 0.00654  | 1 |
| ENSG0000 response | Inflamed | CLMP      | protein_cc chr11 | 1.23E+08 | 1.23E+08 | - | 2635 | 586.5274 | 0        | -0.74111 | 0.216987 | -3.41547 | 0.000925 | 0.006556 | 1 |
| ENSG0000 response | Inflamed | FAM212B   | protein_cc chr1  | 1.12E+08 | 1.12E+08 | - | 9199 | 461.2768 | 0        | -0.48693 | 0.142577 | -3.41524 | 0.000925 | 0.006559 | 1 |
| ENSG0000 response | Inflamed | CALML4    | protein_cc chr15 | 68483043 | 68498417 | - | 5007 | 1961.683 | 0        | 0.444044 | 0.130023 | 3.415119 | 0.000926 | 0.00656  | 1 |
| ENSG0000 response | Inflamed | 7SK       | lincRNA chr16    | 81993524 | 81996298 | + | 2775 | 149.7518 | 0        | -0.76864 | 0.225091 | -3.41481 | 0.000927 | 0.006563 | 1 |
| ENSG0000 response | Inflamed | GPR160    | protein_cc chr3  | 1.7E+08  | 1.7E+08  | + | 4458 | 1514.215 | 0        | 0.488008 | 0.142909 | 3.41481  | 0.000927 | 0.006563 | 1 |
| ENSG0000 response | Inflamed | AGMAT     | protein_cc chr1  | 15898848 | 15911605 | - | 2500 | 923.6181 | 0        | 0.434618 | 0.12729  | 3.41438  | 0.000928 | 0.00657  | 1 |

|                   |          |           |                  |          |          |   |       |          |          |          |          |          |          |          |   |
|-------------------|----------|-----------|------------------|----------|----------|---|-------|----------|----------|----------|----------|----------|----------|----------|---|
| ENSG0000 response | Inflamed | OCLN      | protein_cc chr5  | 68788119 | 68853931 | + | 6761  | 884.7876 | 0        | 0.792267 | 0.232072 | 3.41389  | 0.000929 | 0.006579 | 1 |
| ENSG0000 response | Inflamed | TACR1     | protein_cc chr2  | 75273590 | 75426826 | - | 5308  | 55.60621 | 0.045346 | -0.91556 | 0.268321 | -3.4122  | 0.000935 | 0.006614 | 1 |
| ENSG0000 response | Inflamed | C21orf67  | protein_cc chr21 | 46352729 | 46359828 | - | 2656  | 39.64916 | 0        | -0.34726 | 0.101794 | -3.41139 | 0.000937 | 0.006629 | 1 |
| ENSG0000 response | Inflamed | PDK1      | protein_cc chr2  | 1.73E+08 | 1.73E+08 | + | 15115 | 1633.575 | 0        | -0.73115 | 0.214329 | -3.41133 | 0.000937 | 0.006629 | 1 |
| ENSG0000 response | Inflamed | ERVV-1    | protein_cc chr19 | 53517174 | 53519375 | + | 2202  | 2.563246 | 0.71599  | -0.47573 | 0.139463 | -3.41112 | 0.000938 | 0.006632 | 1 |
| ENSG0000 response | Inflamed | FAM195B   | protein_cc chr17 | 79780287 | 79791178 | - | 3676  | 350.1504 | 0        | -0.42763 | 0.125391 | -3.41039 | 0.00094  | 0.006646 | 1 |
| ENSG0000 response | Inflamed | C3orf52   | protein_cc chr3  | 1.12E+08 | 1.12E+08 | + | 6021  | 757.9356 | 0        | 0.616191 | 0.180688 | 3.410256 | 0.000941 | 0.006647 | 1 |
| ENSG0000 response | Inflamed | PDHA1     | protein_cc chrX  | 19362011 | 19379823 | + | 4493  | 3532.363 | 0        | 0.340763 | 0.099928 | 3.41007  | 0.000941 | 0.006649 | 1 |
| ENSG0000 response | Inflamed | TCEA2     | protein_cc chr20 | 62681189 | 62703700 | + | 4802  | 300.4606 | 0        | -0.50137 | 0.147035 | -3.40989 | 0.000942 | 0.006652 | 1 |
| ENSG0000 response | Inflamed | PM20D1    | protein_cc chr1  | 2.06E+08 | 2.06E+08 | - | 2614  | 18.1599  | 0.150358 | -0.62637 | 0.183724 | -3.40932 | 0.000943 | 0.006661 | 1 |
| ENSG0000 response | Inflamed | RP11-22C1 | pseudoger chr8   | 95700456 | 95700838 | + | 383   | 1.190931 | 0.699284 | 0.347046 | 0.101796 | 3.409236 | 0.000944 | 0.006661 | 1 |
| ENSG0000 response | Inflamed | SERPINA1  | protein_cc chr14 | 94749650 | 94759608 | - | 2614  | 5.443914 | 0.257757 | 0.584113 | 0.171337 | 3.409153 | 0.000944 | 0.006661 | 1 |
| ENSG0000 response | Inflamed | MT1X      | protein_cc chr16 | 56716336 | 56718108 | + | 1773  | 563.4368 | 0        | 0.629716 | 0.184714 | 3.409139 | 0.000944 | 0.006661 | 1 |
| ENSG0000 response | Inflamed | TRPS1     | protein_cc chr8  | 1.16E+08 | 1.17E+08 | - | 11072 | 261.6802 | 0        | -0.74471 | 0.218472 | -3.40873 | 0.000945 | 0.006668 | 1 |
| ENSG0000 response | Inflamed | TMEM44    | protein_cc chr3  | 1.94E+08 | 1.94E+08 | - | 4561  | 1178.42  | 0        | 0.378348 | 0.111102 | 3.40793  | 0.000948 | 0.006684 | 1 |
| ENSG0000 response | Inflamed | B4GALT3   | protein_cc chr1  | 1.61E+08 | 1.61E+08 | - | 3419  | 2035.883 | 0        | -0.227   | 0.066619 | -3.40747 | 0.000949 | 0.00669  | 1 |
| ENSG0000 response | Inflamed | ZNF826P   | pseudoger chr19  | 20451078 | 20607775 | - | 6926  | 10.04057 | 0.054893 | -0.4889  | 0.14348  | -3.40747 | 0.000949 | 0.00669  | 1 |
| ENSG0000 response | Inflamed | RP5-977B1 | antisense chr20  | 35136563 | 35201794 | - | 1979  | 6.424821 | 0.174224 | -0.55404 | 0.162631 | -3.40669 | 0.000952 | 0.006705 | 1 |
| ENSG0000 response | Inflamed | S100A14   | protein_cc chr1  | 1.54E+08 | 1.54E+08 | - | 1277  | 7948.511 | 0        | 0.768906 | 0.225741 | 3.406145 | 0.000953 | 0.006716 | 1 |
| ENSG0000 response | Inflamed | PPIP5K1   | protein_cc chr15 | 43825660 | 43882430 | - | 8054  | 1083.162 | 0        | 0.473399 | 0.138999 | 3.405782 | 0.000954 | 0.006722 | 1 |
| ENSG0000 response | Inflamed | BACE1     | protein_cc chr11 | 1.17E+08 | 1.17E+08 | - | 6711  | 1445.303 | 0        | -0.35926 | 0.105502 | -3.40528 | 0.000956 | 0.006731 | 1 |
| ENSG0000 response | Inflamed | C2CD4A    | protein_cc chr15 | 62359176 | 62363116 | + | 3445  | 350.7518 | 0.004773 | -0.96432 | 0.283219 | -3.40484 | 0.000957 | 0.006738 | 1 |
| ENSG0000 response | Inflamed | RNF144B   | protein_cc chr6  | 18368779 | 18469105 | + | 5446  | 372.1432 | 0        | -0.71726 | 0.21066  | -3.40482 | 0.000957 | 0.006738 | 1 |
| ENSG0000 response | Inflamed | FBXO39    | protein_cc chr17 | 6679542  | 6700420  | + | 2918  | 4.818616 | 0.264916 | -0.62542 | 0.183701 | -3.40455 | 0.000958 | 0.006742 | 1 |
| ENSG0000 response | Inflamed | RP11-565M | lincRNA chr1     | 2.09E+08 | 2.09E+08 | - | 279   | 0.961814 | 0.756563 | -0.40492 | 0.118941 | -3.40441 | 0.000959 | 0.006743 | 1 |
| ENSG0000 response | Inflamed | CRYM      | protein_cc chr16 | 21250195 | 21314404 | - | 3782  | 249.821  | 0.00716  | 0.80943  | 0.237835 | 3.403322 | 0.000962 | 0.006765 | 1 |
| ENSG0000 response | Inflamed | RDH13     | protein_cc chr19 | 55550476 | 55582659 | - | 8575  | 1381.103 | 0        | 0.458441 | 0.134729 | 3.402684 | 0.000964 | 0.006778 | 1 |
| ENSG0000 response | Inflamed | RP11-44N  | lincRNA chr14    | 1.06E+08 | 1.06E+08 | + | 1177  | 57.68974 | 0        | 0.490188 | 0.144064 | 3.402581 | 0.000965 | 0.006778 | 1 |
| ENSG0000 response | Inflamed | MPV17L    | protein_cc chr16 | 15489611 | 15507125 | + | 6009  | 287.5251 | 0        | 0.618641 | 0.181831 | 3.402282 | 0.000965 | 0.006783 | 1 |
| ENSG0000 response | Inflamed | PRSS57    | protein_cc chr19 | 685521   | 695460   | - | 1077  | 1.069212 | 0.74463  | -0.42264 | 0.124241 | -3.40176 | 0.000967 | 0.006793 | 1 |
| ENSG0000 response | Inflamed | LINC00665 | lincRNA chr19    | 36803969 | 36822620 | - | 7201  | 146.9236 | 0        | -0.41239 | 0.121232 | -3.40168 | 0.000967 | 0.006793 | 1 |
| ENSG0000 response | Inflamed | TTYH2     | protein_cc chr17 | 72209653 | 72258155 | + | 5371  | 511.9761 | 0        | -0.44947 | 0.132136 | -3.40155 | 0.000968 | 0.006794 | 1 |
| ENSG0000 response | Inflamed | DSTNP2    | pseudoger chr12  | 6993846  | 6994950  | + | 1105  | 114.1766 | 0        | -0.2628  | 0.077274 | -3.40096 | 0.00097  | 0.006805 | 1 |
| ENSG0000 response | Inflamed | THR-B-AS1 | processed_chr3   | 24535578 | 24541833 | + | 3191  | 3.300716 | 0.379475 | 0.465388 | 0.136851 | 3.400683 | 0.000971 | 0.006809 | 1 |
| ENSG0000 response | Inflamed | AC005523  | lincRNA chr19    | 4785132  | 4791219  | - | 418   | 0.873508 | 0.785203 | -0.31773 | 0.093457 | -3.39974 | 0.000974 | 0.006829 | 1 |
| ENSG0000 response | Inflamed | OAZ1      | protein_cc chr19 | 2269485  | 2273487  | + | 3457  | 15996.95 | 0        | -0.2416  | 0.07108  | -3.39898 | 0.000976 | 0.006844 | 1 |
| ENSG0000 response | Inflamed | LINC00482 | lincRNA chr17    | 79277571 | 79283048 | - | 2197  | 167.6134 | 0        | 0.605327 | 0.178095 | 3.398903 | 0.000976 | 0.006844 | 1 |
| ENSG0000 response | Inflamed | IGKV2D-24 | IG_V_gene chr2   | 90043607 | 90044439 | + | 390   | 158.9117 | 0.004773 | -0.92691 | 0.27273  | -3.39864 | 0.000977 | 0.006848 | 1 |
| ENSG0000 response | Inflamed | IZUMO1    | protein_cc chr19 | 49244109 | 49250166 | - | 3415  | 3.830549 | 0.362768 | -0.58058 | 0.170839 | -3.39841 | 0.000978 | 0.006851 | 1 |
| ENSG0000 response | Inflamed | GDF5      | protein_cc chr20 | 34021145 | 34042568 | - | 2646  | 1.947494 | 0.630072 | -0.55736 | 0.16403  | -3.39795 | 0.000979 | 0.00686  | 1 |

|                   |          |            |                  |          |          |   |       |          |          |          |          |          |          |          |   |
|-------------------|----------|------------|------------------|----------|----------|---|-------|----------|----------|----------|----------|----------|----------|----------|---|
| ENSG0000 response | Inflamed | MARVELD    | protein_cc chr5  | 68710939 | 68740157 | + | 4898  | 1449.692 | 0        | 0.65295  | 0.192233 | 3.396659 | 0.000983 | 0.006887 | 1 |
| ENSG0000 response | Inflamed | RP11-1771  | processed_chr8   | 23193684 | 23223638 | + | 4798  | 9.887828 | 0.088305 | -0.60402 | 0.177836 | -3.39649 | 0.000984 | 0.006889 | 1 |
| ENSG0000 response | Inflamed | HILPDA     | protein_cc chr7  | 1.28E+08 | 1.28E+08 | + | 2070  | 224.6516 | 0        | -0.37716 | 0.111056 | -3.39616 | 0.000985 | 0.006894 | 1 |
| ENSG0000 response | Inflamed | SLC29A2    | protein_cc chr11 | 66129992 | 66139685 | - | 2720  | 850.7518 | 0        | 0.529309 | 0.155872 | 3.395795 | 0.000986 | 0.006901 | 1 |
| ENSG0000 response | Inflamed | HIST1H3J   | protein_cc chr6  | 27858093 | 27860884 | - | 842   | 1.365155 | 0.639618 | 0.325789 | 0.095947 | 3.395518 | 0.000987 | 0.006905 | 1 |
| ENSG0000 response | Inflamed | AC132872   | pseudoger chr17  | 80206943 | 80209703 | + | 2759  | 7.422434 | 0.171838 | -0.65702 | 0.193522 | -3.39506 | 0.000989 | 0.006914 | 1 |
| ENSG0000 response | Inflamed | RNASE1     | protein_cc chr14 | 21269387 | 21271437 | - | 1506  | 4643.274 | 0        | 0.456848 | 0.134578 | 3.394674 | 0.00099  | 0.006921 | 1 |
| ENSG0000 response | Inflamed | LRR55      | protein_cc chr11 | 56949221 | 56959191 | + | 5410  | 44.57518 | 0.038186 | -0.9557  | 0.281606 | -3.39374 | 0.000993 | 0.00694  | 1 |
| ENSG0000 response | Inflamed | ACD        | protein_cc chr16 | 67691415 | 67694713 | - | 3218  | 534.1766 | 0        | -0.28446 | 0.083826 | -3.3934  | 0.000994 | 0.006946 | 1 |
| ENSG0000 response | Inflamed | REPS2      | protein_cc chrX  | 16964814 | 17171395 | + | 11361 | 833.9976 | 0        | 0.407284 | 0.120026 | 3.393288 | 0.000994 | 0.006946 | 1 |
| ENSG0000 response | Inflamed | RP11-4651  | antisense chr1   | 2.02E+08 | 2.02E+08 | - | 1061  | 235.8067 | 0        | 0.601641 | 0.177326 | 3.392863 | 0.000996 | 0.006954 | 1 |
| ENSG0000 response | Inflamed | CD1D       | protein_cc chr1  | 1.58E+08 | 1.58E+08 | + | 2253  | 402.0501 | 0        | -0.43589 | 0.128484 | -3.39257 | 0.000997 | 0.006959 | 1 |
| ENSG0000 response | Inflamed | LYZ        | protein_cc chr12 | 69742121 | 69748014 | + | 1764  | 17476.03 | 0        | -0.54724 | 0.161332 | -3.39197 | 0.000999 | 0.006971 | 1 |
| ENSG0000 response | Inflamed | FAM126A    | protein_cc chr7  | 22980878 | 23053749 | - | 6913  | 351.6516 | 0        | -0.78668 | 0.231991 | -3.39098 | 0.001002 | 0.006992 | 1 |
| ENSG0000 response | Inflamed | FBXL13     | protein_cc chr7  | 1.02E+08 | 1.03E+08 | - | 4319  | 10.22434 | 0.047733 | -0.56706 | 0.167245 | -3.39059 | 0.001003 | 0.006998 | 1 |
| ENSG0000 response | Inflamed | GDPD4      | protein_cc chr11 | 76927603 | 77012732 | - | 3188  | 1.245823 | 0.701671 | 0.351045 | 0.103536 | 3.390555 | 0.001003 | 0.006998 | 1 |
| ENSG0000 response | Inflamed | RP11-620J  | lincRNA chr12    | 58325311 | 58329958 | - | 1312  | 36.60621 | 0        | -0.4257  | 0.125647 | -3.38807 | 0.001011 | 0.007053 | 1 |
| ENSG0000 response | Inflamed | RRP36      | protein_cc chr6  | 42989383 | 43001894 | + | 2212  | 984.0549 | 0        | -0.19079 | 0.056352 | -3.38567 | 0.001019 | 0.007106 | 1 |
| ENSG0000 response | Inflamed | CAV1       | protein_cc chr7  | 1.16E+08 | 1.16E+08 | + | 4077  | 1899.95  | 0        | -0.70424 | 0.208064 | -3.38471 | 0.001022 | 0.007127 | 1 |
| ENSG0000 response | Inflamed | CTD-2619J  | antisense chr19  | 58873951 | 58877958 | + | 790   | 8.909308 | 0.097852 | 0.525786 | 0.155351 | 3.384497 | 0.001023 | 0.00713  | 1 |
| ENSG0000 response | Inflamed | FN3K       | protein_cc chr17 | 80693451 | 80709073 | + | 3872  | 930.432  | 0        | 0.521367 | 0.154049 | 3.384412 | 0.001023 | 0.00713  | 1 |
| ENSG0000 response | Inflamed | TMEM220    | protein_cc chr17 | 10602332 | 10633633 | - | 3508  | 429.2673 | 0        | 0.541455 | 0.160029 | 3.383486 | 0.001027 | 0.007149 | 1 |
| ENSG0000 response | Inflamed | CTD-2336C  | antisense chr8   | 1710156  | 1712668  | - | 1322  | 142.5274 | 0        | -0.33755 | 0.099769 | -3.3833  | 0.001027 | 0.007152 | 1 |
| ENSG0000 response | Inflamed | FAM159A    | protein_cc chr1  | 53099016 | 53135355 | + | 2508  | 56.60143 | 0        | -0.74426 | 0.219995 | -3.38307 | 0.001028 | 0.007155 | 1 |
| ENSG0000 response | Inflamed | LGR6       | protein_cc chr1  | 2.02E+08 | 2.02E+08 | + | 4583  | 280.9212 | 0.004773 | 0.825386 | 0.243984 | 3.382948 | 0.001028 | 0.007156 | 1 |
| ENSG0000 response | Inflamed | UBE2S      | protein_cc chr19 | 55912652 | 55919145 | - | 1249  | 914.1838 | 0        | -0.36343 | 0.107454 | -3.38221 | 0.001031 | 0.007172 | 1 |
| ENSG0000 response | Inflamed | hsa-mir-67 | pseudoger chr1   | 566454   | 567996   | + | 1543  | 65555.85 | 0        | 0.501359 | 0.148246 | 3.381926 | 0.001032 | 0.007176 | 1 |
| ENSG0000 response | Inflamed | IL17RA     | protein_cc chr22 | 17565844 | 17596583 | + | 9035  | 2994.162 | 0        | -0.41814 | 0.123649 | -3.38169 | 0.001033 | 0.007179 | 1 |
| ENSG0000 response | Inflamed | RP11-7401  | pseudoger chr7   | 6940055  | 6940254  | - | 200   | 12.52506 | 0.439141 | 1.14651  | 0.339038 | 3.381651 | 0.001033 | 0.007179 | 1 |
| ENSG0000 response | Inflamed | FAM73B     | protein_cc chr9  | 1.32E+08 | 1.32E+08 | + | 6302  | 2511.745 | 0        | 0.351354 | 0.103914 | 3.3812   | 0.001034 | 0.007188 | 1 |
| ENSG0000 response | Inflamed | NEIL2      | protein_cc chr8  | 11627148 | 11644855 | + | 3367  | 393.0501 | 0        | -0.3216  | 0.095119 | -3.38105 | 0.001035 | 0.007189 | 1 |
| ENSG0000 response | Inflamed | RP11-4491  | lincRNA chr18    | 22208146 | 22242162 | + | 2471  | 38.179   | 0.00716  | 0.645561 | 0.190958 | 3.38064  | 0.001036 | 0.007197 | 1 |
| ENSG0000 response | Inflamed | CLEC12A    | protein_cc chr12 | 10103915 | 10148293 | + | 3250  | 80.14797 | 0        | -0.79752 | 0.235941 | -3.38014 | 0.001038 | 0.007205 | 1 |
| ENSG0000 response | Inflamed | AL122127   | miRNA chr14      | 1.06E+08 | 1.06E+08 | - | 78    | 43.54177 | 0.052506 | -1.00254 | 0.296597 | -3.38012 | 0.001038 | 0.007205 | 1 |
| ENSG0000 response | Inflamed | DLX5       | protein_cc chr7  | 96649704 | 96654409 | - | 1895  | 3.439141 | 0.362768 | -0.59897 | 0.17721  | -3.38002 | 0.001038 | 0.007206 | 1 |
| ENSG0000 response | Inflamed | EIF4EBP3   | protein_cc chr5  | 1.4E+08  | 1.4E+08  | + | 691   | 77.2673  | 0        | 0.416387 | 0.123195 | 3.3799   | 0.001039 | 0.007206 | 1 |
| ENSG0000 response | Inflamed | RP11-4321  | lincRNA chr16    | 71760878 | 71761895 | + | 1018  | 0.97852  | 0.768496 | 0.295036 | 0.087294 | 3.379792 | 0.001039 | 0.007206 | 1 |
| ENSG0000 response | Inflamed | ZC3HC1     | protein_cc chr7  | 1.3E+08  | 1.3E+08  | - | 3011  | 370.0644 | 0        | -0.24582 | 0.072732 | -3.37978 | 0.001039 | 0.007206 | 1 |
| ENSG0000 response | Inflamed | CTD-22671  | protein_cc chr17 | 38516907 | 38520945 | + | 2094  | 347.6587 | 0        | 0.332749 | 0.098467 | 3.379285 | 0.001041 | 0.007216 | 1 |
| ENSG0000 response | Inflamed | CRYBB2     | protein_cc chr22 | 25615489 | 25627836 | + | 886   | 9.708831 | 0.119332 | 0.651009 | 0.192696 | 3.378419 | 0.001044 | 0.007233 | 1 |



|                   |          |           |                  |          |          |   |       |          |          |          |          |          |          |          |   |
|-------------------|----------|-----------|------------------|----------|----------|---|-------|----------|----------|----------|----------|----------|----------|----------|---|
| ENSG0000 response | Inflamed | IRF7      | protein_cc chr11 | 612553   | 615999   | - | 2628  | 1850.167 | 0        | -0.41181 | 0.121897 | -3.37837 | 0.001044 | 0.007233 | 1 |
| ENSG0000 response | Inflamed | AL592494. | lincRNA chr1     | 1.21E+08 | 1.21E+08 | + | 3662  | 7.305489 | 0.124105 | -0.59474 | 0.176055 | -3.37813 | 0.001045 | 0.007237 | 1 |
| ENSG0000 response | Inflamed | GNB4      | protein_cc chr3  | 1.79E+08 | 1.79E+08 | - | 3922  | 348.7088 | 0.002387 | -0.68748 | 0.20352  | -3.37795 | 0.001045 | 0.007239 | 1 |
| ENSG0000 response | Inflamed | AC005307  | lincRNA chr19    | 28926295 | 29218684 | - | 3999  | 5.622912 | 0.229117 | 0.498808 | 0.147697 | 3.377233 | 0.001048 | 0.007254 | 1 |
| ENSG0000 response | Inflamed | RETSAT    | protein_cc chr2  | 85569211 | 85581743 | - | 4264  | 9232.317 | 0        | 0.515227 | 0.152576 | 3.376846 | 0.001049 | 0.007262 | 1 |
| ENSG0000 response | Inflamed | MINOS1    | protein_cc chr1  | 19923477 | 19956314 | + | 5220  | 788.315  | 0        | 0.27069  | 0.080172 | 3.376381 | 0.001051 | 0.007271 | 1 |
| ENSG0000 response | Inflamed | TSTD1     | protein_cc chr1  | 1.61E+08 | 1.61E+08 | - | 1210  | 958.1504 | 0        | 0.410804 | 0.12168  | 3.376113 | 0.001052 | 0.007275 | 1 |
| ENSG0000 response | Inflamed | LETM2     | protein_cc chr8  | 38243725 | 38267045 | + | 6114  | 44.48926 | 0.004773 | -0.57929 | 0.171616 | -3.37552 | 0.001054 | 0.007287 | 1 |
| ENSG0000 response | Inflamed | RP11-269C | lincRNA chr17    | 61507829 | 61509572 | - | 552   | 5.145585 | 0.152745 | 0.513508 | 0.152134 | 3.375363 | 0.001054 | 0.007289 | 1 |
| ENSG0000 response | Inflamed | SMIM22    | protein_cc chr16 | 4838398  | 4846492  | + | 1762  | 2119.212 | 0.004773 | 0.739162 | 0.219003 | 3.375119 | 0.001055 | 0.007293 | 1 |
| ENSG0000 response | Inflamed | RP11-262F | lincRNA chr9     | 66457285 | 66469310 | + | 3038  | 57.35084 | 0.026253 | -0.88736 | 0.262939 | -3.37479 | 0.001056 | 0.007299 | 1 |
| ENSG0000 response | Inflamed | GPX1      | protein_cc chr3  | 49394609 | 49396033 | - | 1425  | 4064.988 | 0        | -0.41613 | 0.123321 | -3.37438 | 0.001058 | 0.007307 | 1 |
| ENSG0000 response | Inflamed | WDR91     | protein_cc chr7  | 1.35E+08 | 1.35E+08 | - | 6063  | 617.2649 | 0        | -0.39517 | 0.117138 | -3.37351 | 0.00106  | 0.007325 | 1 |
| ENSG0000 response | Inflamed | RP11-328H | antisense chr6   | 41462591 | 41516359 | - | 934   | 15.14797 | 0.038186 | 0.602072 | 0.178488 | 3.373178 | 0.001062 | 0.007331 | 1 |
| ENSG0000 response | Inflamed | THSD1     | protein_cc chr13 | 52951305 | 52980629 | - | 3345  | 138.8735 | 0        | -0.58188 | 0.17251  | -3.37305 | 0.001062 | 0.007333 | 1 |
| ENSG0000 response | Inflamed | ESR1      | protein_cc chr6  | 1.52E+08 | 1.52E+08 | + | 13629 | 82.14081 | 0.01432  | -0.84295 | 0.249927 | -3.37278 | 0.001063 | 0.007337 | 1 |
| ENSG0000 response | Inflamed | GRID1     | protein_cc chr10 | 87359312 | 88126250 | - | 6033  | 163.043  | 0.004773 | -0.69263 | 0.205421 | -3.37176 | 0.001067 | 0.00736  | 1 |
| ENSG0000 response | Inflamed | TMEM109   | protein_cc chr11 | 60681346 | 60690915 | + | 2421  | 2764.563 | 0        | -0.36995 | 0.109732 | -3.37141 | 0.001068 | 0.007366 | 1 |
| ENSG0000 response | Inflamed | FER1L6    | protein_cc chr8  | 1.25E+08 | 1.25E+08 | + | 6058  | 1429.351 | 0.00716  | 1.060839 | 0.314676 | 3.37121  | 0.001068 | 0.007369 | 1 |
| ENSG0000 response | Inflamed | CTB-114C7 | lincRNA chr5     | 1.7E+08  | 1.7E+08  | + | 985   | 2.937947 | 0.369928 | -0.45879 | 0.1361   | -3.37099 | 0.001069 | 0.007372 | 1 |
| ENSG0000 response | Inflamed | AL592284. | protein_cc chr1  | 1.44E+08 | 1.45E+08 | + | 1073  | 13.89737 | 0.026253 | -0.4627  | 0.137272 | -3.37067 | 0.00107  | 0.007378 | 1 |
| ENSG0000 response | Inflamed | COL1A1    | protein_cc chr17 | 48260650 | 48278993 | - | 9819  | 47200.82 | 0        | -0.94163 | 0.27937  | -3.37056 | 0.001071 | 0.007379 | 1 |
| ENSG0000 response | Inflamed | ACKR4     | protein_cc chr3  | 1.32E+08 | 1.32E+08 | + | 2273  | 88.51074 | 0.009547 | -0.92676 | 0.27497  | -3.37039 | 0.001071 | 0.00738  | 1 |
| ENSG0000 response | Inflamed | TSPYL5    | protein_cc chr8  | 98285717 | 98290176 | - | 4460  | 308.9093 | 0        | -0.60443 | 0.179338 | -3.37035 | 0.001071 | 0.00738  | 1 |
| ENSG0000 response | Inflamed | AC010982  | lincRNA chr2     | 1.15E+08 | 1.15E+08 | + | 844   | 2.214797 | 0.470167 | -0.47456 | 0.140816 | -3.37005 | 0.001073 | 0.007385 | 1 |
| ENSG0000 response | Inflamed | DMTN      | protein_cc chr8  | 21906506 | 21940038 | + | 4511  | 1684.582 | 0        | 0.377129 | 0.111908 | 3.36998  | 0.001073 | 0.007385 | 1 |
| ENSG0000 response | Inflamed | RMDN2     | protein_cc chr2  | 38150330 | 38294285 | + | 5999  | 248.5036 | 0        | 0.591699 | 0.175588 | 3.369825 | 0.001073 | 0.007387 | 1 |
| ENSG0000 response | Inflamed | HOXD1     | protein_cc chr2  | 1.77E+08 | 1.77E+08 | + | 2028  | 230.5131 | 0        | 0.521603 | 0.154811 | 3.369288 | 0.001075 | 0.007398 | 1 |
| ENSG0000 response | Inflamed | IGHV3OR1  | IG_V_gene chr16  | 32077386 | 32077679 | + | 294   | 6.121718 | 0.403341 | -0.76181 | 0.226157 | -3.36852 | 0.001078 | 0.007414 | 1 |
| ENSG0000 response | Inflamed | UPB1      | protein_cc chr22 | 24863206 | 24924358 | + | 7059  | 13.2673  | 0.057279 | -0.58397 | 0.173384 | -3.36809 | 0.001079 | 0.007423 | 1 |
| ENSG0000 response | Inflamed | RPS6KA1   | protein_cc chr1  | 26856252 | 26901521 | + | 5884  | 8739.327 | 0        | 0.266598 | 0.079198 | 3.366204 | 0.001086 | 0.007465 | 1 |
| ENSG0000 response | Inflamed | NRN1      | protein_cc chr6  | 5998232  | 6007200  | - | 1762  | 151.2172 | 0.002387 | -0.61674 | 0.18322  | -3.36612 | 0.001086 | 0.007465 | 1 |
| ENSG0000 response | Inflamed | FABP5     | protein_cc chr8  | 82192598 | 82197012 | + | 2077  | 1842.482 | 0        | 0.474782 | 0.141049 | 3.366076 | 0.001086 | 0.007465 | 1 |
| ENSG0000 response | Inflamed | AP000695  | protein_cc chr21 | 37858165 | 37860058 | + | 1894  | 2.634845 | 0.52506  | -0.59432 | 0.176585 | -3.36562 | 0.001088 | 0.007475 | 1 |
| ENSG0000 response | Inflamed | ANXA2R    | protein_cc chr5  | 43039335 | 43043272 | - | 2234  | 83.33652 | 0        | -0.49252 | 0.146344 | -3.3655  | 0.001088 | 0.007476 | 1 |
| ENSG0000 response | Inflamed | SCNN1A    | protein_cc chr12 | 6456009  | 6486896  | - | 5876  | 14332.77 | 0        | 0.782462 | 0.23251  | 3.365276 | 0.001089 | 0.007479 | 1 |
| ENSG0000 response | Inflamed | RP11-243F | lincRNA chr16    | 9449445  | 9501950  | + | 5298  | 12.84726 | 0.171838 | 0.813432 | 0.241752 | 3.364743 | 0.001091 | 0.007488 | 1 |
| ENSG0000 response | Inflamed | CBX8      | protein_cc chr17 | 77765931 | 77775482 | - | 4164  | 276.1098 | 0        | -0.30248 | 0.089897 | -3.3647  | 0.001091 | 0.007488 | 1 |
| ENSG0000 response | Inflamed | RP11-375C | lincRNA chr9     | 82120719 | 82147257 | - | 2245  | 1.849642 | 0.572792 | -0.49657 | 0.147583 | -3.36468 | 0.001091 | 0.007488 | 1 |
| ENSG0000 response | Inflamed | ERGIC1    | protein_cc chr5  | 1.72E+08 | 1.72E+08 | + | 14139 | 13711.26 | 0        | 0.230875 | 0.068628 | 3.364136 | 0.001093 | 0.007499 | 1 |

|                   |          |           |                  |          |          |   |       |          |          |          |          |          |          |          |   |
|-------------------|----------|-----------|------------------|----------|----------|---|-------|----------|----------|----------|----------|----------|----------|----------|---|
| ENSG0000 response | Inflamed | KLF3      | protein_cc chr4  | 38665817 | 38702663 | + | 6297  | 5527.158 | 0        | 0.507281 | 0.150796 | 3.364017 | 0.001094 | 0.0075   | 1 |
| ENSG0000 response | Inflamed | RASGRF1   | protein_cc chr15 | 79252289 | 79383115 | - | 8683  | 65.44391 | 0.004773 | -0.57015 | 0.169507 | -3.36361 | 0.001095 | 0.007508 | 1 |
| ENSG0000 response | Inflamed | GRIK1     | protein_cc chr21 | 30909254 | 31312351 | - | 4248  | 2.348449 | 0.479714 | -0.46533 | 0.138365 | -3.36304 | 0.001097 | 0.007518 | 1 |
| ENSG0000 response | Inflamed | RBMS1     | protein_cc chr2  | 1.61E+08 | 1.61E+08 | - | 11750 | 983.957  | 0        | -0.70066 | 0.208343 | -3.36302 | 0.001097 | 0.007518 | 1 |
| ENSG0000 response | Inflamed | IGLV4-60  | IG_V_gene chr22  | 22516592 | 22517074 | + | 362   | 1038.854 | 0.009547 | -1.21577 | 0.361696 | -3.3613  | 0.001103 | 0.007559 | 1 |
| ENSG0000 response | Inflamed | RRM2P3    | pseudoger chrX   | 44168560 | 44169722 | - | 1163  | 2.914081 | 0.319809 | -0.4416  | 0.131385 | -3.36108 | 0.001104 | 0.007559 | 1 |
| ENSG0000 response | Inflamed | USP11     | protein_cc chrX  | 47092089 | 47107727 | + | 5269  | 1902.931 | 0        | -0.4144  | 0.123295 | -3.36108 | 0.001104 | 0.007559 | 1 |
| ENSG0000 response | Inflamed | FLOT2     | protein_cc chr17 | 27206353 | 27224697 | - | 3336  | 5158.399 | 0        | -0.31858 | 0.094786 | -3.36102 | 0.001104 | 0.007559 | 1 |
| ENSG0000 response | Inflamed | AC078942  | antisense chr7   | 1.58E+08 | 1.58E+08 | + | 589   | 1.649165 | 0.670644 | -0.45223 | 0.134603 | -3.35973 | 0.001109 | 0.007589 | 1 |
| ENSG0000 response | Inflamed | NXPE2     | protein_cc chr11 | 1.15E+08 | 1.15E+08 | + | 3126  | 275.778  | 0.004773 | 1.020029 | 0.303654 | 3.359177 | 0.001111 | 0.007601 | 1 |
| ENSG0000 response | Inflamed | RP11-22P6 | antisense chr16  | 28890278 | 28891241 | - | 583   | 13.39857 | 0.00716  | -0.47821 | 0.142368 | -3.35898 | 0.001112 | 0.007602 | 1 |
| ENSG0000 response | Inflamed | MLKL      | protein_cc chr16 | 74705753 | 74734858 | - | 5692  | 1538.064 | 0        | -0.50905 | 0.151551 | -3.35895 | 0.001112 | 0.007602 | 1 |
| ENSG0000 response | Inflamed | SRCRB4D   | protein_cc chr7  | 76018651 | 76039012 | - | 2819  | 16.179   | 0.002387 | -0.36501 | 0.108694 | -3.35817 | 0.001115 | 0.00762  | 1 |
| ENSG0000 response | Inflamed | LBH       | protein_cc chr2  | 30454397 | 30546596 | + | 4535  | 923.0931 | 0        | -0.5968  | 0.177728 | -3.35795 | 0.001115 | 0.00762  | 1 |
| ENSG0000 response | Inflamed | RP11-91J1 | lincRNA chr8     | 424455   | 427966   | + | 3512  | 184.0621 | 0.004773 | 0.668533 | 0.19909  | 3.357948 | 0.001116 | 0.00762  | 1 |
| ENSG0000 response | Inflamed | GNMT      | protein_cc chr6  | 42928496 | 42931618 | + | 1072  | 10.95465 | 0.047733 | -0.53658 | 0.159796 | -3.3579  | 0.001116 | 0.00762  | 1 |
| ENSG0000 response | Inflamed | SCNM1     | protein_cc chr1  | 1.51E+08 | 1.51E+08 | + | 3265  | 689.0334 | 0        | -0.20385 | 0.060722 | -3.35703 | 0.001119 | 0.00764  | 1 |
| ENSG0000 response | Inflamed | TMCC3     | protein_cc chr12 | 94960900 | 95044338 | - | 6515  | 2564.26  | 0        | 0.616949 | 0.183785 | 3.356909 | 0.001119 | 0.007641 | 1 |
| ENSG0000 response | Inflamed | NDN       | protein_cc chr15 | 23930565 | 23932450 | - | 1886  | 674.7279 | 0        | -0.58839 | 0.175282 | -3.35683 | 0.00112  | 0.007641 | 1 |
| ENSG0000 response | Inflamed | CST6      | protein_cc chr11 | 65779312 | 65780976 | + | 759   | 4.28401  | 0.357995 | -0.71409 | 0.212743 | -3.3566  | 0.00112  | 0.007645 | 1 |
| ENSG0000 response | Inflamed | CLDN19    | protein_cc chr1  | 43198764 | 43205925 | - | 3602  | 2.775656 | 0.460621 | 0.530009 | 0.15792  | 3.356194 | 0.001122 | 0.007653 | 1 |
| ENSG0000 response | Inflamed | KCTD11    | protein_cc chr17 | 7255208  | 7258258  | + | 3051  | 1050.597 | 0        | -0.34736 | 0.103505 | -3.35595 | 0.001123 | 0.007656 | 1 |
| ENSG0000 response | Inflamed | MPP1      | protein_cc chrX  | 1.54E+08 | 1.54E+08 | - | 5396  | 1094.859 | 0        | -0.34221 | 0.101971 | -3.3559  | 0.001123 | 0.007656 | 1 |
| ENSG0000 response | Inflamed | MXD3      | protein_cc chr5  | 1.77E+08 | 1.77E+08 | - | 5154  | 423.5394 | 0        | -0.40064 | 0.1194   | -3.35541 | 0.001125 | 0.007666 | 1 |
| ENSG0000 response | Inflamed | TMEM82    | protein_cc chr1  | 16068917 | 16074477 | + | 1520  | 441.7947 | 0.00716  | 0.890711 | 0.265511 | 3.354703 | 0.001127 | 0.007681 | 1 |
| ENSG0000 response | Inflamed | C2orf50   | protein_cc chr2  | 11273179 | 11286916 | + | 2938  | 4.861575 | 0.150358 | -0.47924 | 0.142858 | -3.35466 | 0.001127 | 0.007681 | 1 |
| ENSG0000 response | Inflamed | CHPF2     | protein_cc chr7  | 1.51E+08 | 1.51E+08 | + | 4200  | 4124.702 | 0        | -0.36173 | 0.107848 | -3.35411 | 0.001129 | 0.007693 | 1 |
| ENSG0000 response | Inflamed | ZMYND15   | protein_cc chr17 | 4643319  | 4649411  | + | 3291  | 198.9356 | 0        | -0.42847 | 0.127759 | -3.3537  | 0.001131 | 0.007699 | 1 |
| ENSG0000 response | Inflamed | TRAV3     | TR_V_gene chr14  | 22191960 | 22192568 | + | 519   | 18.22434 | 0.040573 | -0.62933 | 0.187653 | -3.35369 | 0.001131 | 0.007699 | 1 |
| ENSG0000 response | Inflamed | DOCK11    | protein_cc chrX  | 1.18E+08 | 1.18E+08 | + | 6664  | 444.9212 | 0        | -0.67544 | 0.201406 | -3.35362 | 0.001131 | 0.007699 | 1 |
| ENSG0000 response | Inflamed | TPRG1     | protein_cc chr3  | 1.89E+08 | 1.89E+08 | + | 9535  | 38.79475 | 0.002387 | -0.68204 | 0.203425 | -3.3528  | 0.001134 | 0.007717 | 1 |
| ENSG0000 response | Inflamed | AC016773  | pseudoger chr4   | 1741078  | 1743830  | + | 2751  | 146.5609 | 0        | -0.4314  | 0.128709 | -3.35173 | 0.001138 | 0.007742 | 1 |
| ENSG0000 response | Inflamed | LRRN1     | protein_cc chr3  | 3841121  | 3889387  | + | 4264  | 58.31265 | 0.023866 | -0.83109 | 0.247965 | -3.35163 | 0.001139 | 0.007743 | 1 |
| ENSG0000 response | Inflamed | RP11-493L | lincRNA chr12    | 47747537 | 47763718 | + | 540   | 3.326969 | 0.477327 | -0.60091 | 0.179297 | -3.35147 | 0.001139 | 0.007745 | 1 |
| ENSG0000 response | Inflamed | PGRMC1    | protein_cc chrX  | 1.18E+08 | 1.18E+08 | + | 1911  | 2882.933 | 0        | 0.317064 | 0.094612 | 3.351215 | 0.00114  | 0.007747 | 1 |
| ENSG0000 response | Inflamed | C15orf38  | protein_cc chr15 | 90443159 | 90456188 | - | 3673  | 1339.384 | 0        | 0.337308 | 0.100653 | 3.351205 | 0.00114  | 0.007747 | 1 |
| ENSG0000 response | Inflamed | DBNL      | protein_cc chr7  | 44084239 | 44109055 | + | 12587 | 5963.828 | 0        | -0.20076 | 0.059908 | -3.35103 | 0.001141 | 0.00775  | 1 |
| ENSG0000 response | Inflamed | SLC16A3   | protein_cc chr17 | 80186273 | 80219005 | + | 8995  | 7155.663 | 0        | -0.43487 | 0.129775 | -3.35093 | 0.001141 | 0.00775  | 1 |
| ENSG0000 response | Inflamed | RP11-547L | antisense chr14  | 53620072 | 53624246 | + | 1076  | 1.107399 | 0.713604 | -0.36531 | 0.109028 | -3.35057 | 0.001143 | 0.007757 | 1 |
| ENSG0000 response | Inflamed | ARHGEF16  | protein_cc chr1  | 3370990  | 3397677  | + | 5563  | 3899.146 | 0        | 0.58296  | 0.174027 | 3.349832 | 0.001145 | 0.007774 | 1 |

|                   |          |           |                  |          |          |   |       |          |          |          |          |          |          |          |   |
|-------------------|----------|-----------|------------------|----------|----------|---|-------|----------|----------|----------|----------|----------|----------|----------|---|
| ENSG0000 response | Inflamed | KIAA0040  | protein_cc chr1  | 1.75E+08 | 1.75E+08 | - | 4779  | 2103.057 | 0        | -0.47366 | 0.141401 | -3.34973 | 0.001146 | 0.007774 | 1 |
| ENSG0000 response | Inflamed | RP4-647C1 | antisense chr14  | 73710726 | 73712687 | - | 1683  | 28.06205 | 0.004773 | -0.54004 | 0.161227 | -3.34956 | 0.001146 | 0.007777 | 1 |
| ENSG0000 response | Inflamed | IGHV1-8   | IG_V_gene chr14  | 1.07E+08 | 1.07E+08 | - | 413   | 2662.893 | 0.031026 | -1.26367 | 0.377304 | -3.3492  | 0.001148 | 0.007784 | 1 |
| ENSG0000 response | Inflamed | SRP68     | protein_cc chr17 | 74035184 | 74068734 | - | 7313  | 2740.57  | 0        | -0.25873 | 0.077264 | -3.34864 | 0.00115  | 0.007796 | 1 |
| ENSG0000 response | Inflamed | ACSL5     | protein_cc chr10 | 1.14E+08 | 1.14E+08 | + | 4318  | 11101.43 | 0        | 0.488394 | 0.145866 | 3.348228 | 0.001151 | 0.007803 | 1 |
| ENSG0000 response | Inflamed | ARHGAP5   | antisense chr14  | 32544625 | 32545999 | - | 1375  | 78.61098 | 0        | 0.299412 | 0.089424 | 3.348214 | 0.001151 | 0.007803 | 1 |
| ENSG0000 response | Inflamed | MAP4K4    | protein_cc chr2  | 1.02E+08 | 1.03E+08 | + | 11918 | 2751.525 | 0        | -0.58488 | 0.174823 | -3.34555 | 0.001161 | 0.007868 | 1 |
| ENSG0000 response | Inflamed | RPS2P32   | pseudoger chr7   | 23530092 | 23530983 | + | 892   | 11.19809 | 0.023866 | -0.58913 | 0.176098 | -3.34545 | 0.001162 | 0.007869 | 1 |
| ENSG0000 response | Inflamed | SLC6A13   | protein_cc chr12 | 329789   | 372039   | - | 4241  | 5.651551 | 0.252983 | -0.65821 | 0.196763 | -3.3452  | 0.001163 | 0.007872 | 1 |
| ENSG0000 response | Inflamed | ANKS4B    | protein_cc chr16 | 21244986 | 21263750 | + | 2936  | 1878.327 | 0.002387 | 0.787666 | 0.235463 | 3.345182 | 0.001163 | 0.007872 | 1 |
| ENSG0000 response | Inflamed | TPGS2     | protein_cc chr18 | 34359987 | 34409158 | - | 8082  | 1441.174 | 0        | -0.22588 | 0.067528 | -3.34506 | 0.001163 | 0.007873 | 1 |
| ENSG0000 response | Inflamed | RP11-297L | lincRNA chr16    | 52641261 | 52647820 | + | 1137  | 17.60859 | 0.0358   | 0.629386 | 0.188161 | 3.344931 | 0.001164 | 0.007874 | 1 |
| ENSG0000 response | Inflamed | INSM1     | protein_cc chr20 | 20348765 | 20351590 | + | 2826  | 147.4893 | 0.004773 | 0.762459 | 0.227982 | 3.344386 | 0.001166 | 0.007886 | 1 |
| ENSG0000 response | Inflamed | TMEM236   | protein_cc chr10 | 17794251 | 17842867 | + | 5464  | 162.2959 | 0.059666 | 1.085342 | 0.324583 | 3.343807 | 0.001168 | 0.007899 | 1 |
| ENSG0000 response | Inflamed | ATP13A5   | protein_cc chr3  | 1.93E+08 | 1.93E+08 | - | 6228  | 0.959427 | 0.768496 | 0.334206 | 0.099961 | 3.343368 | 0.001169 | 0.007906 | 1 |
| ENSG0000 response | Inflamed | AKAP7     | protein_cc chr6  | 1.31E+08 | 1.32E+08 | + | 4394  | 375.6516 | 0        | 0.58796  | 0.175866 | 3.343218 | 0.00117  | 0.007906 | 1 |
| ENSG0000 response | Inflamed | MRPL15    | protein_cc chr8  | 55047770 | 55060461 | + | 1191  | 982.6134 | 0        | 0.319012 | 0.095422 | 3.34316  | 0.00117  | 0.007906 | 1 |
| ENSG0000 response | Inflamed | GBP2      | protein_cc chr1  | 89571815 | 89616139 | - | 6276  | 3376.389 | 0        | -0.50174 | 0.150082 | -3.34311 | 0.00117  | 0.007906 | 1 |
| ENSG0000 response | Inflamed | ZNF474    | protein_cc chr5  | 1.21E+08 | 1.22E+08 | + | 2364  | 3.365155 | 0.336516 | -0.52574 | 0.157265 | -3.34301 | 0.001171 | 0.007906 | 1 |
| ENSG0000 response | Inflamed | MEST      | protein_cc chr7  | 1.3E+08  | 1.3E+08  | + | 4624  | 883.3461 | 0        | 0.450093 | 0.13464  | 3.342934 | 0.001171 | 0.007906 | 1 |
| ENSG0000 response | Inflamed | RP11-64P1 | antisense chr9   | 1.25E+08 | 1.25E+08 | + | 636   | 3.353222 | 0.508353 | -0.62756 | 0.187726 | -3.34293 | 0.001171 | 0.007906 | 1 |
| ENSG0000 response | Inflamed | IGKV1D-13 | IG_V_gene chr2   | 90192768 | 90193424 | + | 531   | 1949.895 | 0.004773 | -1.23517 | 0.36949  | -3.3429  | 0.001171 | 0.007906 | 1 |
| ENSG0000 response | Inflamed | FUT6      | protein_cc chr19 | 5830621  | 5839742  | - | 4349  | 2339.759 | 0        | 0.659167 | 0.1972   | 3.342624 | 0.001172 | 0.00791  | 1 |
| ENSG0000 response | Inflamed | PHB       | protein_cc chr17 | 47481414 | 47492246 | - | 3814  | 4599.143 | 0        | 0.325719 | 0.097458 | 3.342135 | 0.001174 | 0.007921 | 1 |
| ENSG0000 response | Inflamed | CCDC71    | protein_cc chr3  | 49199968 | 49203754 | - | 1781  | 641.1695 | 0        | -0.18825 | 0.056335 | -3.34156 | 0.001176 | 0.007934 | 1 |
| ENSG0000 response | Inflamed | C11orf70  | protein_cc chr11 | 1.02E+08 | 1.02E+08 | + | 2647  | 9.245823 | 0.071599 | -0.59121 | 0.176933 | -3.34141 | 0.001177 | 0.007935 | 1 |
| ENSG0000 response | Inflamed | RP11-465E | lincRNA chr1     | 1072397  | 1079436  | + | 1620  | 41.49642 | 0.045346 | 0.760503 | 0.227637 | 3.340856 | 0.001179 | 0.007948 | 1 |
| ENSG0000 response | Inflamed | PINLYP    | protein_cc chr19 | 44080952 | 44088116 | + | 3570  | 40.99523 | 0        | -0.51396 | 0.153849 | -3.34067 | 0.00118  | 0.00795  | 1 |
| ENSG0000 response | Inflamed | PACIN2    | protein_cc chr22 | 43231418 | 43411151 | - | 4545  | 6499.387 | 0        | 0.329458 | 0.098634 | 3.340219 | 0.001181 | 0.00796  | 1 |
| ENSG0000 response | Inflamed | C10orf99  | protein_cc chr10 | 85933494 | 85945050 | + | 888   | 6712.348 | 0.002387 | 1.390108 | 0.416206 | 3.339953 | 0.001182 | 0.007964 | 1 |
| ENSG0000 response | Inflamed | DNER      | protein_cc chr2  | 2.3E+08  | 2.31E+08 | - | 3935  | 24.6611  | 0.059666 | -0.80413 | 0.240764 | -3.33992 | 0.001183 | 0.007964 | 1 |
| ENSG0000 response | Inflamed | RP11-8H2  | pseudoger chr18  | 43608272 | 43609795 | + | 1524  | 1.042959 | 0.754177 | -0.39962 | 0.119668 | -3.33939 | 0.001185 | 0.007975 | 1 |
| ENSG0000 response | Inflamed | HOXA2     | protein_cc chr7  | 27139721 | 27142430 | - | 2066  | 84.87112 | 0.004773 | 0.616832 | 0.184771 | 3.338364 | 0.001189 | 0.007999 | 1 |
| ENSG0000 response | Inflamed | KLF5      | protein_cc chr13 | 73629114 | 73651676 | + | 3889  | 11616.94 | 0        | 0.657405 | 0.19693  | 3.338264 | 0.001189 | 0.007999 | 1 |
| ENSG0000 response | Inflamed | SLC16A2   | protein_cc chrX  | 73641085 | 73753752 | + | 4372  | 547.3079 | 0        | -0.56322 | 0.16872  | -3.33822 | 0.001189 | 0.007999 | 1 |
| ENSG0000 response | Inflamed | TMEM30B   | protein_cc chr14 | 61744088 | 61748558 | - | 4471  | 4003.227 | 0        | 0.641639 | 0.192237 | 3.337754 | 0.001191 | 0.008008 | 1 |
| ENSG0000 response | Inflamed | AC004017  | protein_cc chr19 | 58203868 | 58204128 | - | 261   | 3.591885 | 0.338902 | -0.52002 | 0.1558   | -3.33771 | 0.001191 | 0.008008 | 1 |
| ENSG0000 response | Inflamed | DNASE2B   | protein_cc chr1  | 84864215 | 84880701 | + | 1476  | 9.720764 | 0.088305 | 0.606285 | 0.181654 | 3.337587 | 0.001192 | 0.00801  | 1 |
| ENSG0000 response | Inflamed | CTD-2020t | antisense chr17  | 43268298 | 43299589 | - | 3719  | 319.5752 | 0.004773 | -0.85347 | 0.255752 | -3.33709 | 0.001193 | 0.00802  | 1 |
| ENSG0000 response | Inflamed | IZUMO4    | protein_cc chr19 | 2096380  | 2099592  | + | 2818  | 82.44153 | 0        | -0.4635  | 0.138908 | -3.33671 | 0.001195 | 0.008028 | 1 |

|                   |          |           |                  |          |          |   |       |          |          |          |          |          |          |          |   |
|-------------------|----------|-----------|------------------|----------|----------|---|-------|----------|----------|----------|----------|----------|----------|----------|---|
| ENSG0000 response | Inflamed | ABCC1     | protein_cc chr16 | 16043434 | 16236931 | + | 7575  | 3431.601 | 0        | -0.43232 | 0.129579 | -3.33636 | 0.001196 | 0.008035 | 1 |
| ENSG0000 response | Inflamed | CKMT1A    | protein_cc chr15 | 43985084 | 43991420 | + | 3088  | 1195.625 | 0.004773 | 0.726161 | 0.217693 | 3.335704 | 0.001199 | 0.00805  | 1 |
| ENSG0000 response | Inflamed | RASL12    | protein_cc chr15 | 65345679 | 65369028 | - | 2798  | 598.0955 | 0        | -0.52196 | 0.156491 | -3.3354  | 0.0012   | 0.008054 | 1 |
| ENSG0000 response | Inflamed | MT-TN     | Mt_tRNA chrM     | 5657     | 5729     | - | 73    | 2.48926  | 0.431981 | 0.415482 | 0.12457  | 3.335327 | 0.0012   | 0.008054 | 1 |
| ENSG0000 response | Inflamed | FABP1     | protein_cc chr2  | 88422510 | 88427635 | - | 2461  | 45613.02 | 0        | 1.108076 | 0.332225 | 3.335322 | 0.0012   | 0.008054 | 1 |
| ENSG0000 response | Inflamed | RP1-3100  | antisense chr20  | 30615556 | 30619378 | - | 2013  | 1.599045 | 0.684964 | -0.54831 | 0.164415 | -3.33494 | 0.001202 | 0.008062 | 1 |
| ENSG0000 response | Inflamed | PLA2G12B  | protein_cc chr10 | 74694928 | 74714536 | - | 1128  | 63.79714 | 0.105012 | 1.200389 | 0.359982 | 3.334577 | 0.001203 | 0.008069 | 1 |
| ENSG0000 response | Inflamed | RP11-1091 | antisense chr15  | 45333914 | 45350905 | - | 542   | 0.742243 | 0.797136 | -0.37446 | 0.1123   | -3.33444 | 0.001204 | 0.008071 | 1 |
| ENSG0000 response | Inflamed | SLC1A2    | protein_cc chr11 | 35272753 | 35441610 | - | 12331 | 30.26492 | 0.088305 | -1.02068 | 0.30614  | -3.33401 | 0.001205 | 0.008079 | 1 |
| ENSG0000 response | Inflamed | ASAP3     | protein_cc chr1  | 23755056 | 23811061 | - | 4988  | 1716.317 | 0        | 0.366433 | 0.109909 | 3.333961 | 0.001206 | 0.008079 | 1 |
| ENSG0000 response | Inflamed | CCDC109B  | protein_cc chr4  | 1.1E+08  | 1.11E+08 | + | 3558  | 421.2339 | 0        | -0.45918 | 0.137741 | -3.33364 | 0.001207 | 0.008085 | 1 |
| ENSG0000 response | Inflamed | CST3      | protein_cc chr20 | 23608534 | 23619110 | - | 2504  | 20206.08 | 0        | 0.315815 | 0.09474  | 3.333505 | 0.001207 | 0.008087 | 1 |
| ENSG0000 response | Inflamed | PDZK1     | protein_cc chr1  | 1.46E+08 | 1.46E+08 | + | 2347  | 63.65394 | 0.045346 | 1.183067 | 0.354953 | 3.333028 | 0.001209 | 0.008097 | 1 |
| ENSG0000 response | Inflamed | RAP1GAP2  | protein_cc chr17 | 2680350  | 2941033  | + | 7350  | 2821.783 | 0        | 0.439672 | 0.131918 | 3.332914 | 0.00121  | 0.008097 | 1 |
| ENSG0000 response | Inflamed | RASSF8    | protein_cc chr12 | 26111962 | 26232825 | + | 7615  | 206.6325 | 0.01432  | -0.90216 | 0.270685 | -3.33288 | 0.00121  | 0.008097 | 1 |
| ENSG0000 response | Inflamed | CLIP3     | protein_cc chr19 | 36505562 | 36524245 | - | 3772  | 764.9427 | 0        | -0.60805 | 0.182449 | -3.33272 | 0.00121  | 0.008099 | 1 |
| ENSG0000 response | Inflamed | WDR83     | protein_cc chr19 | 12777614 | 12786646 | + | 2360  | 209.5107 | 0        | -0.22189 | 0.066589 | -3.33229 | 0.001212 | 0.008108 | 1 |
| ENSG0000 response | Inflamed | CASZ1     | protein_cc chr1  | 10696661 | 10856707 | - | 11336 | 2834.048 | 0        | 0.514034 | 0.154358 | 3.330141 | 0.001221 | 0.008163 | 1 |
| ENSG0000 response | Inflamed | TRBV20-1  | TR_V_gene chr7   | 1.42E+08 | 1.42E+08 | + | 413   | 57.4463  | 0.004773 | -0.71878 | 0.215872 | -3.32967 | 0.001222 | 0.008173 | 1 |
| ENSG0000 response | Inflamed | CCDC28B   | protein_cc chr1  | 32665987 | 32670988 | + | 2818  | 99.98329 | 0        | -0.46932 | 0.140961 | -3.32945 | 0.001223 | 0.008177 | 1 |
| ENSG0000 response | Inflamed | TPM2      | protein_cc chr9  | 35681989 | 35691017 | - | 4047  | 3020.663 | 0        | -0.62804 | 0.188641 | -3.32931 | 0.001224 | 0.008178 | 1 |
| ENSG0000 response | Inflamed | SIX1      | protein_cc chr14 | 61110133 | 61124977 | - | 5430  | 12.37947 | 0.202864 | -0.82864 | 0.248903 | -3.32918 | 0.001224 | 0.00818  | 1 |
| ENSG0000 response | Inflamed | TCIRG1    | protein_cc chr11 | 67806483 | 67818362 | + | 4384  | 7170.379 | 0        | -0.3719  | 0.111172 | -3.32887 | 0.001226 | 0.008186 | 1 |
| ENSG0000 response | Inflamed | ARHGAP35  | protein_cc chr8  | 1.46E+08 | 1.46E+08 | - | 5012  | 573.0931 | 0        | 0.433012 | 0.130088 | 3.328607 | 0.001227 | 0.008191 | 1 |
| ENSG0000 response | Inflamed | NUDT17    | protein_cc chr1  | 1.46E+08 | 1.46E+08 | - | 1657  | 59.42482 | 0        | -0.37441 | 0.112492 | -3.32831 | 0.001228 | 0.008196 | 1 |
| ENSG0000 response | Inflamed | C17orf51  | protein_cc chr17 | 21428051 | 21477722 | - | 8760  | 274.5274 | 0.002387 | -0.49454 | 0.148594 | -3.32816 | 0.001228 | 0.008197 | 1 |
| ENSG0000 response | Inflamed | HDGFRP3   | protein_cc chr15 | 83784320 | 83876770 | - | 3112  | 298.1718 | 0        | -0.62814 | 0.188738 | -3.32812 | 0.001228 | 0.008197 | 1 |
| ENSG0000 response | Inflamed | C10orf95  | protein_cc chr10 | 1.04E+08 | 1.04E+08 | - | 1469  | 51.7494  | 0.002387 | 0.487556 | 0.146526 | 3.327445 | 0.001231 | 0.008211 | 1 |
| ENSG0000 response | Inflamed | RTKN      | protein_cc chr2  | 74652963 | 74669549 | - | 5005  | 1403.053 | 0        | 0.343815 | 0.103328 | 3.327428 | 0.001231 | 0.008211 | 1 |
| ENSG0000 response | Inflamed | RP11-43N1 | lincRNA chr12    | 68102827 | 68123255 | - | 3135  | 14.52267 | 0.286396 | 0.992901 | 0.298449 | 3.326866 | 0.001233 | 0.008224 | 1 |
| ENSG0000 response | Inflamed | RP11-148k | antisense chr7   | 1.51E+08 | 1.51E+08 | - | 1230  | 13.83532 | 0.045346 | 0.551505 | 0.165797 | 3.326383 | 0.001235 | 0.008234 | 1 |
| ENSG0000 response | Inflamed | GGN       | protein_cc chr19 | 38874905 | 38878722 | - | 2447  | 20.86635 | 0.033413 | -0.69679 | 0.209477 | -3.32634 | 0.001236 | 0.008234 | 1 |
| ENSG0000 response | Inflamed | TSHZ3     | protein_cc chr19 | 31765851 | 31840453 | - | 5817  | 466.2792 | 0        | -0.5898  | 0.17732  | -3.3262  | 0.001236 | 0.008236 | 1 |
| ENSG0000 response | Inflamed | NDST2     | protein_cc chr10 | 75561669 | 75571589 | - | 4685  | 114.2506 | 0        | -0.33154 | 0.099689 | -3.32575 | 0.001238 | 0.008245 | 1 |
| ENSG0000 response | Inflamed | KCND3     | protein_cc chr1  | 1.12E+08 | 1.13E+08 | - | 7863  | 929.599  | 0        | -0.86713 | 0.260852 | -3.32424 | 0.001244 | 0.008284 | 1 |
| ENSG0000 response | Inflamed | PAPSS1    | protein_cc chr4  | 1.09E+08 | 1.09E+08 | - | 3478  | 1272.895 | 0        | -0.40036 | 0.12044  | -3.32414 | 0.001244 | 0.008284 | 1 |
| ENSG0000 response | Inflamed | D86994.2  | miRNA chr22      | 23006898 | 23006993 | + | 96    | 947.6921 | 0.073986 | -1.01827 | 0.30643  | -3.32301 | 0.001249 | 0.008312 | 1 |
| ENSG0000 response | Inflamed | IGHV3-65  | IG_V_pseud chr14 | 1.07E+08 | 1.07E+08 | - | 341   | 2.873508 | 0.613365 | -0.66751 | 0.200883 | -3.32288 | 0.001249 | 0.008314 | 1 |
| ENSG0000 response | Inflamed | RP11-4651 | antisense chr1   | 2.02E+08 | 2.02E+08 | - | 657   | 53.77804 | 0.00716  | 0.614745 | 0.185034 | 3.322338 | 0.001252 | 0.008326 | 1 |
| ENSG0000 response | Inflamed | DLK2      | protein_cc chr6  | 43418090 | 43424370 | - | 2236  | 12.78759 | 0.081146 | -0.62357 | 0.187703 | -3.32211 | 0.001253 | 0.00833  | 1 |

|                   |          |            |                  |          |          |   |       |          |          |          |          |          |          |          |   |
|-------------------|----------|------------|------------------|----------|----------|---|-------|----------|----------|----------|----------|----------|----------|----------|---|
| ENSG0000 response | Inflamed | PHC2       | protein_cc chr1  | 33789224 | 33896653 | - | 5410  | 4721.115 | 0        | -0.35625 | 0.107293 | -3.32036 | 0.00126  | 0.008375 | 1 |
| ENSG0000 response | Inflamed | CHIT1      | protein_cc chr1  | 2.03E+08 | 2.03E+08 | - | 7730  | 85.63484 | 0.01432  | -0.90519 | 0.272631 | -3.32019 | 0.00126  | 0.008377 | 1 |
| ENSG0000 response | Inflamed | IGLV1-36   | IG_V_gene chr22  | 22786296 | 22786802 | + | 392   | 822.7589 | 0.002387 | -1.25066 | 0.376689 | -3.32014 | 0.00126  | 0.008377 | 1 |
| ENSG0000 response | Inflamed | SNORA47    | snoRNA chr5      | 76376259 | 76376396 | - | 138   | 1.250597 | 0.668258 | 0.374044 | 0.112686 | 3.319346 | 0.001264 | 0.008396 | 1 |
| ENSG0000 response | Inflamed | EMID1      | protein_cc chr22 | 29601840 | 29655586 | + | 4899  | 1132.637 | 0        | -0.45459 | 0.136972 | -3.31889 | 0.001266 | 0.008406 | 1 |
| ENSG0000 response | Inflamed | RP4-550H1  | lincRNA chr20    | 34660363 | 34673182 | + | 682   | 1.527446 | 0.584726 | 0.363825 | 0.109625 | 3.318804 | 0.001266 | 0.008406 | 1 |
| ENSG0000 response | Inflamed | PARM1      | protein_cc chr4  | 75858305 | 75975325 | + | 5034  | 18062.02 | 0        | 0.543125 | 0.163661 | 3.318603 | 0.001267 | 0.00841  | 1 |
| ENSG0000 response | Inflamed | GAPT       | protein_cc chr5  | 57787262 | 57792917 | + | 3273  | 139.3962 | 0        | -0.72503 | 0.218488 | -3.31839 | 0.001268 | 0.008413 | 1 |
| ENSG0000 response | Inflamed | ORAI3      | protein_cc chr16 | 30960387 | 30967782 | + | 2643  | 388.4988 | 0        | -0.29315 | 0.088352 | -3.31801 | 0.001269 | 0.008422 | 1 |
| ENSG0000 response | Inflamed | STYK1      | protein_cc chr12 | 10771538 | 10826917 | - | 3424  | 698.9332 | 0        | 0.690741 | 0.208204 | 3.317614 | 0.001271 | 0.00843  | 1 |
| ENSG0000 response | Inflamed | CEP112     | protein_cc chr17 | 63631656 | 64188202 | - | 7849  | 71.49642 | 0        | -0.60026 | 0.180943 | -3.31738 | 0.001272 | 0.008435 | 1 |
| ENSG0000 response | Inflamed | CTD-2377I  | lincRNA chr17    | 46782360 | 46784708 | + | 1974  | 925.6468 | 0.002387 | 0.822089 | 0.247903 | 3.316168 | 0.001277 | 0.008464 | 1 |
| ENSG0000 response | Inflamed | C12orf45   | protein_cc chr12 | 1.05E+08 | 1.05E+08 | + | 1424  | 233.8401 | 0        | -0.3029  | 0.091342 | -3.31613 | 0.001277 | 0.008464 | 1 |
| ENSG0000 response | Inflamed | RP11-98G1  | lincRNA chr1     | 1.56E+08 | 1.56E+08 | - | 990   | 1.878282 | 0.551313 | 0.379768 | 0.114556 | 3.315116 | 0.001281 | 0.00849  | 1 |
| ENSG0000 response | Inflamed | YIF1B      | protein_cc chr19 | 38795753 | 38807913 | - | 3184  | 1170.442 | 0        | -0.3112  | 0.093879 | -3.31492 | 0.001282 | 0.008493 | 1 |
| ENSG0000 response | Inflamed | RP11-145M  | lincRNA chr1     | 59522315 | 59553867 | + | 623   | 2.057279 | 0.53222  | -0.46661 | 0.140804 | -3.31388 | 0.001286 | 0.008519 | 1 |
| ENSG0000 response | Inflamed | STON1-GT   | protein_cc chr2  | 48757064 | 49003654 | + | 4294  | 1.159905 | 0.74463  | -0.44018 | 0.132846 | -3.31347 | 0.001288 | 0.008528 | 1 |
| ENSG0000 response | Inflamed | SEMA6B     | protein_cc chr19 | 4542600  | 4559820  | - | 4423  | 1269.081 | 0        | -0.60437 | 0.182407 | -3.31329 | 0.001289 | 0.008531 | 1 |
| ENSG0000 response | Inflamed | CHKB-AS1   | antisense chr22  | 51021455 | 51022306 | + | 578   | 16.21718 | 0.004773 | -0.40311 | 0.121672 | -3.31308 | 0.001289 | 0.008535 | 1 |
| ENSG0000 response | Inflamed | VGLL3      | protein_cc chr3  | 86987119 | 87040269 | - | 11574 | 129.3055 | 0.01432  | -0.91411 | 0.275976 | -3.3123  | 0.001293 | 0.008554 | 1 |
| ENSG0000 response | Inflamed | SNED1      | protein_cc chr2  | 2.42E+08 | 2.42E+08 | + | 13592 | 1636.48  | 0        | -0.65228 | 0.196957 | -3.31179 | 0.001295 | 0.008566 | 1 |
| ENSG0000 response | Inflamed | TMEM59     | protein_cc chr1  | 54497347 | 54519177 | - | 4156  | 9095.427 | 0        | 0.2945   | 0.088939 | 3.311246 | 0.001297 | 0.008579 | 1 |
| ENSG0000 response | Inflamed | SPOCD1     | protein_cc chr1  | 32256023 | 32281652 | - | 7085  | 125.7375 | 0.004773 | -0.68948 | 0.208231 | -3.31113 | 0.001298 | 0.00858  | 1 |
| ENSG0000 response | Inflamed | RP1-273G1  | pseudoger chr8   | 33827079 | 33827397 | - | 319   | 8.854415 | 0.042959 | 0.46025  | 0.139015 | 3.310788 | 0.001299 | 0.008587 | 1 |
| ENSG0000 response | Inflamed | CC2D1A     | protein_cc chr19 | 14017014 | 14041692 | + | 5039  | 4299.406 | 0        | 0.373855 | 0.112929 | 3.310539 | 0.0013   | 0.008592 | 1 |
| ENSG0000 response | Inflamed | RPL36AP4   | pseudoger chr15  | 90231168 | 90231474 | - | 307   | 10.66826 | 0.145585 | 0.712391 | 0.215204 | 3.310308 | 0.001301 | 0.008596 | 1 |
| ENSG0000 response | Inflamed | GPR182     | protein_cc chr12 | 57388230 | 57390468 | + | 1694  | 4.24105  | 0.381862 | -0.62575 | 0.189037 | -3.3102  | 0.001301 | 0.008597 | 1 |
| ENSG0000 response | Inflamed | RP11-723C1 | lincRNA chr3     | 1.29E+08 | 1.29E+08 | - | 811   | 12.01432 | 0.059666 | -0.56949 | 0.172046 | -3.31012 | 0.001302 | 0.008597 | 1 |
| ENSG0000 response | Inflamed | RBPMS-AS   | antisense chr8   | 30239635 | 30242917 | - | 1171  | 16.65632 | 0.0358   | -0.54725 | 0.165335 | -3.30997 | 0.001302 | 0.008598 | 1 |
| ENSG0000 response | Inflamed | KCNT1      | protein_cc chr9  | 1.39E+08 | 1.39E+08 | + | 9275  | 6.040573 | 0.236277 | -0.62005 | 0.187332 | -3.30991 | 0.001303 | 0.008598 | 1 |
| ENSG0000 response | Inflamed | ZDHHC23    | protein_cc chr3  | 1.14E+08 | 1.14E+08 | + | 7138  | 1170.47  | 0        | 0.680166 | 0.2055   | 3.309807 | 0.001303 | 0.008599 | 1 |
| ENSG0000 response | Inflamed | RN7SL5411  | misc_RNA chr5    | 1.34E+08 | 1.34E+08 | + | 285   | 8.52506  | 0.186158 | 0.604654 | 0.182701 | 3.309524 | 0.001304 | 0.008605 | 1 |
| ENSG0000 response | Inflamed | PLBD2      | protein_cc chr12 | 1.14E+08 | 1.14E+08 | + | 3033  | 1733.272 | 0        | -0.39102 | 0.118168 | -3.30904 | 0.001306 | 0.008616 | 1 |
| ENSG0000 response | Inflamed | RIMS4      | protein_cc chr20 | 43380449 | 43438979 | - | 5206  | 47.26014 | 0.140811 | 1.019341 | 0.308165 | 3.307779 | 0.001312 | 0.008649 | 1 |
| ENSG0000 response | Inflamed | IFI16      | protein_cc chr1  | 1.59E+08 | 1.59E+08 | + | 5294  | 1798.134 | 0        | -0.64011 | 0.193542 | -3.30733 | 0.001313 | 0.008659 | 1 |
| ENSG0000 response | Inflamed | TRBV6-6    | TR_V_gene chr7   | 1.42E+08 | 1.42E+08 | - | 388   | 13.05489 | 0.076372 | -0.6204  | 0.187594 | -3.30714 | 0.001314 | 0.008662 | 1 |
| ENSG0000 response | Inflamed | ST3GAL6-1  | antisense chr3   | 98433174 | 98451495 | - | 843   | 4.245823 | 0.21957  | -0.52812 | 0.159713 | -3.30669 | 0.001316 | 0.008671 | 1 |
| ENSG0000 response | Inflamed | CHPT1      | protein_cc chr12 | 1.02E+08 | 1.02E+08 | + | 6004  | 2110.487 | 0        | 0.347677 | 0.105145 | 3.306647 | 0.001316 | 0.008671 | 1 |
| ENSG0000 response | Inflamed | PTPRS      | protein_cc chr19 | 5158506  | 5340814  | - | 9460  | 1237.36  | 0        | -0.60896 | 0.184207 | -3.30586 | 0.00132  | 0.008691 | 1 |
| ENSG0000 response | Inflamed | PLA2G12A   | protein_cc chr4  | 1.11E+08 | 1.11E+08 | - | 5228  | 869.2196 | 0        | 0.363031 | 0.109825 | 3.305541 | 0.001321 | 0.008698 | 1 |

|                   |          |           |                  |          |          |   |       |          |          |          |          |          |          |          |   |
|-------------------|----------|-----------|------------------|----------|----------|---|-------|----------|----------|----------|----------|----------|----------|----------|---|
| ENSG0000 response | Inflamed | ATF4      | protein_cc chr22 | 39915700 | 39918691 | + | 2515  | 10135.8  | 0        | -0.26462 | 0.080057 | -3.30542 | 0.001322 | 0.008699 | 1 |
| ENSG0000 response | Inflamed | RP4-575N1 | antisense chr1   | 1.02E+08 | 1.02E+08 | - | 403   | 4.131265 | 0.295943 | -0.59463 | 0.179926 | -3.30487 | 0.001324 | 0.008712 | 1 |
| ENSG0000 response | Inflamed | IGHV3-72  | IG_V_gene chr14  | 1.07E+08 | 1.07E+08 | - | 437   | 3844.148 | 0        | -1.06303 | 0.321688 | -3.30452 | 0.001325 | 0.00872  | 1 |
| ENSG0000 response | Inflamed | DNAH6     | protein_cc chr2  | 84743579 | 85046713 | + | 13514 | 24.80907 | 0.02148  | 0.631906 | 0.191228 | 3.304457 | 0.001326 | 0.00872  | 1 |
| ENSG0000 response | Inflamed | KBTBD11   | protein_cc chr8  | 1922044  | 1955102  | + | 6710  | 2381.976 | 0        | 0.544054 | 0.164649 | 3.304327 | 0.001326 | 0.00872  | 1 |
| ENSG0000 response | Inflamed | FAM149A   | protein_cc chr4  | 1.87E+08 | 1.87E+08 | + | 5218  | 336.6229 | 0        | 0.369306 | 0.111767 | 3.304238 | 0.001327 | 0.00872  | 1 |
| ENSG0000 response | Inflamed | CACNA1D   | protein_cc chr3  | 53528683 | 53847760 | + | 11218 | 398.7064 | 0        | 0.683792 | 0.206945 | 3.304219 | 0.001327 | 0.00872  | 1 |
| ENSG0000 response | Inflamed | SLC4A10   | protein_cc chr2  | 1.62E+08 | 1.63E+08 | + | 7550  | 65.29117 | 0.026253 | 0.71799  | 0.217324 | 3.303786 | 0.001329 | 0.008729 | 1 |
| ENSG0000 response | Inflamed | CA12      | protein_cc chr15 | 63613577 | 63674360 | - | 7313  | 16402.57 | 0        | 0.638278 | 0.1932   | 3.303727 | 0.001329 | 0.008729 | 1 |
| ENSG0000 response | Inflamed | CNFN      | protein_cc chr19 | 42891171 | 42894439 | - | 603   | 52.69451 | 0        | 0.638944 | 0.193412 | 3.303543 | 0.00133  | 0.008732 | 1 |
| ENSG0000 response | Inflamed | DQX1      | protein_cc chr2  | 74745258 | 74753463 | - | 2940  | 1031.747 | 0        | 0.619977 | 0.187744 | 3.302243 | 0.001335 | 0.008766 | 1 |
| ENSG0000 response | Inflamed | CNTNAP3   | protein_cc chr9  | 39072764 | 39288312 | - | 9525  | 38.38186 | 0.026253 | -0.70754 | 0.214324 | -3.30126 | 0.001339 | 0.008792 | 1 |
| ENSG0000 response | Inflamed | THSD7A    | protein_cc chr7  | 11409984 | 11871824 | - | 10923 | 96.23628 | 0.023866 | -0.80021 | 0.242419 | -3.30093 | 0.001341 | 0.008799 | 1 |
| ENSG0000 response | Inflamed | PDE4A     | protein_cc chr19 | 10527449 | 10580305 | + | 6644  | 1319.033 | 0        | -0.40875 | 0.123833 | -3.30083 | 0.001341 | 0.008799 | 1 |
| ENSG0000 response | Inflamed | ACY1      | protein_cc chr3  | 52009066 | 52023213 | + | 3768  | 338.7947 | 0        | 0.364446 | 0.110433 | 3.300144 | 0.001344 | 0.008815 | 1 |
| ENSG0000 response | Inflamed | LMTK3     | protein_cc chr19 | 48988528 | 49016446 | - | 5163  | 118.2029 | 0        | -0.56891 | 0.172391 | -3.30011 | 0.001344 | 0.008815 | 1 |
| ENSG0000 response | Inflamed | SLC6A17   | protein_cc chr1  | 1.11E+08 | 1.11E+08 | + | 6644  | 7.217184 | 0.178998 | -0.68602 | 0.207889 | -3.29993 | 0.001345 | 0.008818 | 1 |
| ENSG0000 response | Inflamed | NAALADL1  | protein_cc chr11 | 64812290 | 64826021 | - | 4044  | 820      | 0        | 0.837988 | 0.25396  | 3.299681 | 0.001346 | 0.008821 | 1 |
| ENSG0000 response | Inflamed | WDR65     | protein_cc chr1  | 43637820 | 43720029 | + | 5665  | 5.379475 | 0.157518 | -0.46112 | 0.139746 | -3.29968 | 0.001346 | 0.008821 | 1 |
| ENSG0000 response | Inflamed | ACVR1     | protein_cc chr2  | 1.59E+08 | 1.59E+08 | - | 3988  | 1030.31  | 0        | -0.40572 | 0.122966 | -3.29941 | 0.001347 | 0.008827 | 1 |
| ENSG0000 response | Inflamed | TTLL6     | protein_cc chr17 | 46839597 | 46894576 | - | 5097  | 417.8496 | 0.00716  | 0.871288 | 0.264121 | 3.298816 | 0.00135  | 0.008841 | 1 |
| ENSG0000 response | Inflamed | FABP2     | protein_cc chr4  | 1.2E+08  | 1.2E+08  | - | 2478  | 1523.2   | 0.004773 | 1.008635 | 0.305794 | 3.298411 | 0.001352 | 0.008846 | 1 |
| ENSG0000 response | Inflamed | CD34      | protein_cc chr1  | 2.08E+08 | 2.08E+08 | - | 3949  | 1662.73  | 0        | -0.65107 | 0.197393 | -3.29835 | 0.001352 | 0.008846 | 1 |
| ENSG0000 response | Inflamed | ACAA1     | protein_cc chr3  | 38144620 | 38178733 | - | 7106  | 3972.422 | 0        | 0.246713 | 0.074799 | 3.29834  | 0.001352 | 0.008846 | 1 |
| ENSG0000 response | Inflamed | SLC7A10   | protein_cc chr19 | 33699570 | 33716756 | - | 3111  | 9.613365 | 0.169451 | -0.68229 | 0.206858 | -3.29834 | 0.001352 | 0.008846 | 1 |
| ENSG0000 response | Inflamed | FAM83E    | protein_cc chr19 | 49104067 | 49118111 | - | 2529  | 5558.8   | 0        | 0.767339 | 0.232671 | 3.297962 | 0.001354 | 0.008854 | 1 |
| ENSG0000 response | Inflamed | AC130710  | lincRNA chr2     | 16190549 | 16225923 | + | 1330  | 0.868735 | 0.787589 | 0.324055 | 0.098276 | 3.29741  | 0.001356 | 0.008868 | 1 |
| ENSG0000 response | Inflamed | SERPINA4  | protein_cc chr14 | 95027428 | 95036250 | + | 2338  | 1.930788 | 0.692124 | -0.59218 | 0.179597 | -3.29724 | 0.001357 | 0.008868 | 1 |
| ENSG0000 response | Inflamed | COL9A3    | protein_cc chr20 | 61447596 | 61472511 | + | 4831  | 183.7064 | 0        | -0.48925 | 0.148381 | -3.29723 | 0.001357 | 0.008868 | 1 |
| ENSG0000 response | Inflamed | MAP3K8    | protein_cc chr10 | 30722866 | 30750762 | + | 3601  | 612.2864 | 0        | -0.59982 | 0.181951 | -3.2966  | 0.00136  | 0.008884 | 1 |
| ENSG0000 response | Inflamed | TPTE2P5   | pseudoger chr13  | 41396432 | 41495890 | - | 1343  | 14.78282 | 0.054893 | 0.645727 | 0.195893 | 3.296322 | 0.001361 | 0.00889  | 1 |
| ENSG0000 response | Inflamed | RMND5A    | protein_cc chr2  | 86947296 | 87005164 | + | 6804  | 2806.48  | 0        | 0.544304 | 0.16513  | 3.296225 | 0.001361 | 0.00889  | 1 |
| ENSG0000 response | Inflamed | ARAP1     | protein_cc chr11 | 72396114 | 72504644 | - | 9047  | 6138.516 | 0        | -0.35995 | 0.109208 | -3.29599 | 0.001362 | 0.008895 | 1 |
| ENSG0000 response | Inflamed | CASD1     | protein_cc chr7  | 94138531 | 94186331 | + | 5271  | 1079.745 | 0.002387 | 0.605566 | 0.18378  | 3.295064 | 0.001366 | 0.008919 | 1 |
| ENSG0000 response | Inflamed | KIAA1456  | protein_cc chr8  | 12803151 | 12889012 | + | 14668 | 258.2554 | 0        | 0.730544 | 0.221747 | 3.294499 | 0.001369 | 0.008933 | 1 |
| ENSG0000 response | Inflamed | RP11-8611 | lincRNA chr3     | 1.08E+08 | 1.08E+08 | + | 2592  | 44.31981 | 0.062053 | -1.0083  | 0.306083 | -3.29421 | 0.00137  | 0.008939 | 1 |
| ENSG0000 response | Inflamed | ABCC3     | protein_cc chr17 | 48712138 | 48769613 | + | 9614  | 13404.61 | 0        | 0.472422 | 0.143413 | 3.294125 | 0.00137  | 0.008939 | 1 |
| ENSG0000 response | Inflamed | THSD4     | protein_cc chr15 | 71389291 | 72075722 | + | 15803 | 1702.659 | 0        | 0.623241 | 0.189208 | 3.293942 | 0.001371 | 0.008942 | 1 |
| ENSG0000 response | Inflamed | PPA2      | protein_cc chr4  | 1.06E+08 | 1.06E+08 | - | 4654  | 1358.551 | 0        | 0.327976 | 0.099584 | 3.293481 | 0.001373 | 0.008953 | 1 |
| ENSG0000 response | Inflamed | EPN1      | protein_cc chr19 | 56186592 | 56221224 | + | 3849  | 10945.77 | 0        | 0.291131 | 0.08841  | 3.29296  | 0.001375 | 0.008966 | 1 |

|                   |          |           |                  |          |          |   |       |          |          |          |          |          |          |          |   |
|-------------------|----------|-----------|------------------|----------|----------|---|-------|----------|----------|----------|----------|----------|----------|----------|---|
| ENSG0000 response | Inflamed | AICDA     | protein_cc chr12 | 8754762  | 8765467  | - | 3115  | 23       | 0.310263 | -1.1193  | 0.33995  | -3.29254 | 0.001377 | 0.008976 | 1 |
| ENSG0000 response | Inflamed | RP11-986E | protein_cc chr14 | 95058395 | 95090983 | + | 3067  | 4.085919 | 0.408115 | -0.61669 | 0.187316 | -3.29226 | 0.001379 | 0.008982 | 1 |
| ENSG0000 response | Inflamed | RP11-300J | lincRNA chr14    | 88490894 | 88563276 | + | 2120  | 3.620525 | 0.377088 | -0.51837 | 0.157478 | -3.29168 | 0.001381 | 0.008996 | 1 |
| ENSG0000 response | Inflamed | ASPHD1    | protein_cc chr16 | 29911696 | 29931185 | + | 2312  | 108.2196 | 0        | -0.57404 | 0.174399 | -3.29153 | 0.001382 | 0.008998 | 1 |
| ENSG0000 response | Inflamed | AC017048  | lincRNA chr2     | 1.77E+08 | 1.78E+08 | - | 1783  | 71.34845 | 0        | -0.54389 | 0.165254 | -3.29123 | 0.001383 | 0.009002 | 1 |
| ENSG0000 response | Inflamed | SH3RF2    | protein_cc chr5  | 1.45E+08 | 1.45E+08 | + | 7232  | 2918.363 | 0        | 0.702041 | 0.213315 | 3.291101 | 0.001384 | 0.009002 | 1 |
| ENSG0000 response | Inflamed | DNAJB5    | protein_cc chr9  | 34989638 | 34998897 | + | 5891  | 314.4582 | 0.002387 | -0.59452 | 0.180646 | -3.29108 | 0.001384 | 0.009002 | 1 |
| ENSG0000 response | Inflamed | B3GALT1   | protein_cc chr2  | 1.69E+08 | 1.69E+08 | + | 5353  | 359.3294 | 0.009547 | 1.201963 | 0.365223 | 3.291033 | 0.001384 | 0.009002 | 1 |
| ENSG0000 response | Inflamed | RP11-15H2 | processed_chr19  | 23442708 | 23457053 | - | 5091  | 142.5728 | 0        | 0.496162 | 0.150762 | 3.291019 | 0.001384 | 0.009002 | 1 |
| ENSG0000 response | Inflamed | IGHV3-35  | IG_V_gene chr14  | 1.07E+08 | 1.07E+08 | - | 366   | 4.894988 | 0.389021 | -0.57744 | 0.17547  | -3.29085 | 0.001385 | 0.009005 | 1 |
| ENSG0000 response | Inflamed | PRSS3     | protein_cc chr9  | 33750515 | 33799230 | + | 1614  | 3332.234 | 0        | 0.724305 | 0.220108 | 3.290677 | 0.001386 | 0.009007 | 1 |
| ENSG0000 response | Inflamed | TUBB4B    | protein_cc chr9  | 1.4E+08  | 1.4E+08  | + | 2111  | 17426.14 | 0        | 0.294187 | 0.089411 | 3.290281 | 0.001387 | 0.009017 | 1 |
| ENSG0000 response | Inflamed | IGDCC4    | protein_cc chr15 | 65673802 | 65715410 | - | 7764  | 829.7279 | 0.002387 | -0.7662  | 0.232299 | -3.28853 | 0.001395 | 0.009065 | 1 |
| ENSG0000 response | Inflamed | IGHV3OR1  | IG_V_pseu chr16  | 32926395 | 32926857 | + | 360   | 1.26969  | 0.677804 | -0.42991 | 0.130741 | -3.28823 | 0.001396 | 0.009071 | 1 |
| ENSG0000 response | Inflamed | LINC00862 | lincRNA chr1     | 2E+08    | 2E+08    | - | 1757  | 2.863962 | 0.403341 | -0.51893 | 0.157822 | -3.28809 | 0.001397 | 0.009073 | 1 |
| ENSG0000 response | Inflamed | RP11-424I | lincRNA chr15    | 1.02E+08 | 1.02E+08 | + | 762   | 2.536993 | 0.51074  | -0.55039 | 0.167401 | -3.28786 | 0.001398 | 0.009078 | 1 |
| ENSG0000 response | Inflamed | ANO10     | protein_cc chr3  | 43396351 | 43733086 | - | 5287  | 2104     | 0        | 0.312435 | 0.095031 | 3.287723 | 0.001399 | 0.009079 | 1 |
| ENSG0000 response | Inflamed | RSPO4     | protein_cc chr20 | 939095   | 982907   | - | 2710  | 7.861575 | 0.300716 | -0.80919 | 0.246145 | -3.28745 | 0.0014   | 0.009085 | 1 |
| ENSG0000 response | Inflamed | LCN2      | protein_cc chr9  | 1.31E+08 | 1.31E+08 | + | 2057  | 31698.69 | 0        | -1.17409 | 0.35716  | -3.28731 | 0.001401 | 0.009087 | 1 |
| ENSG0000 response | Inflamed | AMZ2      | protein_cc chr17 | 66243715 | 66253297 | + | 4206  | 934.2267 | 0        | -0.27234 | 0.082848 | -3.28717 | 0.001401 | 0.009089 | 1 |
| ENSG0000 response | Inflamed | TIGIT     | protein_cc chr3  | 1.14E+08 | 1.14E+08 | + | 6091  | 286.3126 | 0        | -0.69045 | 0.210059 | -3.28693 | 0.001402 | 0.009093 | 1 |
| ENSG0000 response | Inflamed | ETNK2     | protein_cc chr1  | 2.04E+08 | 2.04E+08 | - | 4648  | 81.63962 | 0        | -0.57593 | 0.175242 | -3.28651 | 0.001404 | 0.009104 | 1 |
| ENSG0000 response | Inflamed | AC012146  | processed_chr17  | 5014763  | 5017674  | + | 856   | 41.2506  | 0        | -0.49336 | 0.150164 | -3.28544 | 0.001409 | 0.009132 | 1 |
| ENSG0000 response | Inflamed | PISD      | protein_cc chr22 | 32014477 | 32058418 | - | 5002  | 1421.475 | 0        | -0.26577 | 0.080903 | -3.28508 | 0.001411 | 0.009141 | 1 |
| ENSG0000 response | Inflamed | ASPG      | protein_cc chr14 | 1.05E+08 | 1.05E+08 | + | 3305  | 240.0621 | 0.002387 | 0.876869 | 0.266943 | 3.28485  | 0.001412 | 0.009144 | 1 |
| ENSG0000 response | Inflamed | AC004538  | processed_chr7   | 11221359 | 11559802 | + | 4621  | 7.088305 | 0.121718 | -0.5825  | 0.177334 | -3.28479 | 0.001412 | 0.009144 | 1 |
| ENSG0000 response | Inflamed | TOX3      | protein_cc chr16 | 52471917 | 52581714 | - | 5031  | 1196.484 | 0        | 0.651349 | 0.198298 | 3.284693 | 0.001412 | 0.009144 | 1 |
| ENSG0000 response | Inflamed | FBXO17    | protein_cc chr19 | 39432044 | 39466550 | - | 4957  | 140.7542 | 0        | -0.50591 | 0.154022 | -3.28465 | 0.001412 | 0.009144 | 1 |
| ENSG0000 response | Inflamed | NEO1      | protein_cc chr15 | 73344051 | 73597547 | + | 8117  | 9096.487 | 0        | 0.537158 | 0.163553 | 3.284311 | 0.001414 | 0.009152 | 1 |
| ENSG0000 response | Inflamed | PAX5      | protein_cc chr9  | 36833272 | 37034103 | - | 9254  | 831.8902 | 0        | -1.2601  | 0.383685 | -3.28422 | 0.001414 | 0.009152 | 1 |
| ENSG0000 response | Inflamed | ATP11A    | protein_cc chr13 | 1.13E+08 | 1.14E+08 | + | 12172 | 1893.11  | 0.002387 | -0.53842 | 0.164018 | -3.28266 | 0.001422 | 0.009195 | 1 |
| ENSG0000 response | Inflamed | OR7E14P   | pseudoger chr11  | 17035545 | 17074583 | + | 1382  | 349.0883 | 0        | 0.540946 | 0.164792 | 3.282599 | 0.001422 | 0.009195 | 1 |
| ENSG0000 response | Inflamed | MDH2      | protein_cc chr7  | 75677369 | 75696826 | + | 3641  | 9108.926 | 0        | 0.243668 | 0.074248 | 3.281811 | 0.001425 | 0.009216 | 1 |
| ENSG0000 response | Inflamed | ARHGAP36  | protein_cc chrX  | 1.3E+08  | 1.3E+08  | + | 3173  | 3.658711 | 0.498807 | 0.521499 | 0.158926 | 3.281405 | 0.001427 | 0.009226 | 1 |
| ENSG0000 response | Inflamed | RP11-511E | antisense chr12  | 93397191 | 93609455 | - | 1914  | 3.615752 | 0.310263 | 0.45058  | 0.137316 | 3.281328 | 0.001428 | 0.009226 | 1 |
| ENSG0000 response | Inflamed | RAB24     | protein_cc chr5  | 1.77E+08 | 1.77E+08 | - | 2065  | 539.5442 | 0        | -0.39426 | 0.120163 | -3.28109 | 0.001429 | 0.009231 | 1 |
| ENSG0000 response | Inflamed | CPA3      | protein_cc chr3  | 1.49E+08 | 1.49E+08 | + | 1848  | 1337.613 | 0        | -0.70861 | 0.216007 | -3.28049 | 0.001431 | 0.009246 | 1 |
| ENSG0000 response | Inflamed | RP11-467L | pseudoger chr12  | 31907651 | 31908055 | + | 405   | 11.34606 | 0.062053 | -0.59664 | 0.181897 | -3.28012 | 0.001433 | 0.009254 | 1 |
| ENSG0000 response | Inflamed | TTYH3     | protein_cc chr7  | 2671585  | 2704436  | + | 6129  | 8049.776 | 0        | -0.46513 | 0.141805 | -3.28007 | 0.001433 | 0.009254 | 1 |
| ENSG0000 response | Inflamed | TUBG2     | protein_cc chr17 | 40811323 | 40819024 | + | 2772  | 342.9618 | 0        | -0.44022 | 0.13425  | -3.27908 | 0.001438 | 0.009281 | 1 |

|                   |          |                     |       |          |          |   |      |          |          |          |          |          |          |          |   |
|-------------------|----------|---------------------|-------|----------|----------|---|------|----------|----------|----------|----------|----------|----------|----------|---|
| ENSG0000 response | Inflamed | RP11-204L antisense | chr2  | 1.22E+08 | 1.22E+08 | + | 682  | 6.763723 | 0.138425 | -0.52225 | 0.159273 | -3.27898 | 0.001438 | 0.009282 | 1 |
| ENSG0000 response | Inflamed | AC093627 lincRNA    | chr7  | 149597   | 155465   | + | 5149 | 60.5537  | 0        | -0.40961 | 0.124951 | -3.27814 | 0.001442 | 0.009302 | 1 |
| ENSG0000 response | Inflamed | ARF3 protein_cc     | chr12 | 49329506 | 49351334 | - | 5002 | 12605.73 | 0        | 0.324319 | 0.098935 | 3.278104 | 0.001442 | 0.009302 | 1 |
| ENSG0000 response | Inflamed | H1FX-AS1 antisense  | chr3  | 1.29E+08 | 1.29E+08 | + | 3420 | 106.8329 | 0        | -0.47351 | 0.144449 | -3.27807 | 0.001443 | 0.009302 | 1 |
| ENSG0000 response | Inflamed | RP11-326C lincRNA   | chr11 | 333192   | 333688   | + | 497  | 6.369928 | 0.386635 | -0.77335 | 0.235933 | -3.27786 | 0.001443 | 0.009304 | 1 |
| ENSG0000 response | Inflamed | FABP5P7 pseudoger   | chr11 | 59548786 | 59549195 | - | 410  | 11.13842 | 0.023866 | 0.487208 | 0.148637 | 3.277834 | 0.001444 | 0.009304 | 1 |
| ENSG0000 response | Inflamed | PLVAP protein_cc    | chr19 | 17462257 | 17488159 | - | 2305 | 8679.902 | 0        | -0.616   | 0.187958 | -3.27735 | 0.001446 | 0.009316 | 1 |
| ENSG0000 response | Inflamed | SNX10 protein_cc    | chr7  | 26331541 | 26413949 | + | 3421 | 297.9141 | 0        | -0.74308 | 0.226767 | -3.27683 | 0.001448 | 0.00933  | 1 |
| ENSG0000 response | Inflamed | B3GALT2 protein_cc  | chr1  | 1.93E+08 | 1.93E+08 | - | 3274 | 41.04773 | 0.002387 | 0.655359 | 0.200032 | 3.276278 | 0.001451 | 0.009344 | 1 |
| ENSG0000 response | Inflamed | SPG21 protein_cc    | chr15 | 65255362 | 65282648 | - | 3984 | 2180.816 | 0        | -0.19862 | 0.060635 | -3.27564 | 0.001454 | 0.00936  | 1 |
| ENSG0000 response | Inflamed | CTA-150C lincRNA    | chr22 | 39317232 | 39320713 | + | 678  | 3.145585 | 0.556086 | 0.471629 | 0.143994 | 3.275343 | 0.001455 | 0.009367 | 1 |
| ENSG0000 response | Inflamed | FBXL2 protein_cc    | chr3  | 33318517 | 33445154 | + | 7664 | 34.77566 | 0.016706 | -0.67439 | 0.205935 | -3.27478 | 0.001458 | 0.009382 | 1 |
| ENSG0000 response | Inflamed | RP11-312C antisense | chr1  | 2.06E+08 | 2.06E+08 | - | 895  | 13.45585 | 0.038186 | -0.53182 | 0.162466 | -3.27343 | 0.001464 | 0.00942  | 1 |
| ENSG0000 response | Inflamed | FAM19A3 protein_cc  | chr1  | 1.13E+08 | 1.13E+08 | + | 1282 | 1.059666 | 0.742243 | -0.33093 | 0.101101 | -3.2733  | 0.001465 | 0.00942  | 1 |
| ENSG0000 response | Inflamed | U47924.27 lincRNA   | chr12 | 7072409  | 7073610  | + | 350  | 95.7852  | 0.009547 | 0.627502 | 0.191704 | 3.27328  | 0.001465 | 0.00942  | 1 |
| ENSG0000 response | Inflamed | RP11-6N1 antisense  | chr17 | 46024168 | 46025641 | - | 527  | 30.99523 | 0.031026 | 0.7884   | 0.240892 | 3.272836 | 0.001467 | 0.00943  | 1 |
| ENSG0000 response | Inflamed | TMEM56 protein_cc   | chr1  | 95582894 | 95663163 | + | 7402 | 818.1575 | 0        | 0.825324 | 0.252177 | 3.272797 | 0.001467 | 0.00943  | 1 |
| ENSG0000 response | Inflamed | RP11-773 pseudoger  | chr18 | 12912843 | 12913905 | + | 1063 | 3.431981 | 0.329356 | -0.49281 | 0.150588 | -3.27257 | 0.001468 | 0.009434 | 1 |
| ENSG0000 response | Inflamed | KCNA5 protein_cc    | chr12 | 5153085  | 5155949  | + | 2865 | 25.44869 | 0.033413 | -0.80371 | 0.245623 | -3.27215 | 0.00147  | 0.009443 | 1 |
| ENSG0000 response | Inflamed | NOS2P3 pseudoger    | chr17 | 20339650 | 20350557 | + | 3638 | 1.933174 | 0.536993 | 0.469355 | 0.143441 | 3.272106 | 0.00147  | 0.009443 | 1 |
| ENSG0000 response | Inflamed | SDC4 protein_cc     | chr20 | 43953928 | 43977064 | - | 2613 | 5352.477 | 0        | 0.337949 | 0.103302 | 3.271451 | 0.001473 | 0.009461 | 1 |
| ENSG0000 response | Inflamed | ABCC6P1 pseudoger   | chr16 | 18582484 | 18609650 | + | 3431 | 168.9761 | 0.002387 | 0.772967 | 0.236325 | 3.270785 | 0.001476 | 0.009479 | 1 |
| ENSG0000 response | Inflamed | MT-TD Mt_tRNA       | chrM  | 7518     | 7585     | + | 68   | 159.2053 | 0.038186 | 0.805032 | 0.246159 | 3.270375 | 0.001478 | 0.009489 | 1 |
| ENSG0000 response | Inflamed | XK protein_cc       | chrX  | 37545012 | 37591383 | + | 5206 | 1135.031 | 0        | 0.696525 | 0.212989 | 3.270236 | 0.001479 | 0.009491 | 1 |
| ENSG0000 response | Inflamed | SUSD5 protein_cc    | chr3  | 33191537 | 33260707 | - | 5005 | 12.06444 | 0.157518 | -0.83207 | 0.254496 | -3.2695  | 0.001482 | 0.009511 | 1 |
| ENSG0000 response | Inflamed | PRR13 protein_cc    | chr12 | 53835389 | 53840429 | + | 2897 | 6691.017 | 0        | 0.276069 | 0.084442 | 3.269315 | 0.001483 | 0.009514 | 1 |
| ENSG0000 response | Inflamed | QPRT protein_cc     | chr16 | 29674600 | 29710020 | + | 3680 | 1407.78  | 0        | 0.411105 | 0.125784 | 3.268337 | 0.001488 | 0.009541 | 1 |
| ENSG0000 response | Inflamed | MSX2 protein_cc     | chr5  | 1.74E+08 | 1.74E+08 | + | 2270 | 89.27446 | 0        | -0.70353 | 0.215263 | -3.26823 | 0.001488 | 0.009541 | 1 |
| ENSG0000 response | Inflamed | TIGD3 protein_cc    | chr11 | 65122238 | 65125084 | + | 2012 | 21.43437 | 0.011933 | -0.4652  | 0.142344 | -3.26818 | 0.001489 | 0.009541 | 1 |
| ENSG0000 response | Inflamed | RP11-103J lincRNA   | chr20 | 10981952 | 10982411 | + | 460  | 2.319809 | 0.560859 | 0.437697 | 0.133964 | 3.267269 | 0.001493 | 0.009567 | 1 |
| ENSG0000 response | Inflamed | SIAE protein_cc     | chr11 | 1.25E+08 | 1.25E+08 | - | 7911 | 6185.706 | 0        | 0.473162 | 0.14486  | 3.266338 | 0.001497 | 0.009593 | 1 |
| ENSG0000 response | Inflamed | RPIA protein_cc     | chr2  | 88991162 | 89050452 | + | 1848 | 832.4391 | 0        | 0.278141 | 0.085163 | 3.265981 | 0.001499 | 0.009601 | 1 |
| ENSG0000 response | Inflamed | TBPL2 protein_cc    | chr14 | 55880259 | 55923444 | - | 2407 | 1.863962 | 0.646778 | 0.424322 | 0.129926 | 3.265883 | 0.0015   | 0.009601 | 1 |
| ENSG0000 response | Inflamed | DAZL protein_cc     | chr3  | 16628299 | 16711813 | - | 3631 | 10.0358  | 0.393795 | -0.94229 | 0.288529 | -3.26584 | 0.0015   | 0.009601 | 1 |
| ENSG0000 response | Inflamed | RHBDL2 protein_cc   | chr1  | 39351479 | 39407471 | - | 2914 | 752.3484 | 0        | 0.546683 | 0.167445 | 3.264844 | 0.001505 | 0.009629 | 1 |
| ENSG0000 response | Inflamed | RGMB protein_cc     | chr5  | 98104354 | 98134347 | + | 6671 | 2478.702 | 0        | 0.618405 | 0.189429 | 3.264568 | 0.001506 | 0.009635 | 1 |
| ENSG0000 response | Inflamed | HCST protein_cc     | chr19 | 36393382 | 36395279 | + | 613  | 363.1766 | 0        | -0.50305 | 0.154097 | -3.26448 | 0.001506 | 0.009636 | 1 |
| ENSG0000 response | Inflamed | NHSL2 protein_cc    | chrX  | 71130938 | 71363424 | + | 5001 | 126.4558 | 0.016706 | -0.74468 | 0.228125 | -3.26436 | 0.001507 | 0.009637 | 1 |
| ENSG0000 response | Inflamed | NRGN protein_cc     | chr11 | 1.25E+08 | 1.25E+08 | + | 1309 | 162.7733 | 0        | -0.4727  | 0.144814 | -3.2642  | 0.001508 | 0.009638 | 1 |
| ENSG0000 response | Inflamed | IGHV4OR1 IG_V_gene  | chr15 | 22472918 | 22473353 | - | 353  | 1465.874 | 0.004773 | -1.15173 | 0.352839 | -3.26418 | 0.001508 | 0.009638 | 1 |



|                   |          |                         |       |          |          |   |       |          |          |          |          |          |          |          |   |
|-------------------|----------|-------------------------|-------|----------|----------|---|-------|----------|----------|----------|----------|----------|----------|----------|---|
| ENSG0000 response | Inflamed | AC011747 antisense      | chr2  | 8806766  | 8821993  | - | 2060  | 64.78043 | 0.004773 | 0.749071 | 0.22949  | 3.264062 | 0.001508 | 0.009639 | 1 |
| ENSG0000 response | Inflamed | AC069277 lincRNA        | chr3  | 6532166  | 6777816  | + | 3023  | 9.718377 | 0.159905 | 0.73842  | 0.226233 | 3.263984 | 0.001509 | 0.009639 | 1 |
| ENSG0000 response | Inflamed | CD200 protein_cc        | chr3  | 1.12E+08 | 1.12E+08 | + | 2991  | 329.8401 | 0        | -0.50102 | 0.153506 | -3.26386 | 0.001509 | 0.009641 | 1 |
| ENSG0000 response | Inflamed | FTL protein_cc          | chr19 | 49468558 | 49470135 | + | 878   | 70707.24 | 0        | -0.44175 | 0.135369 | -3.26332 | 0.001512 | 0.009655 | 1 |
| ENSG0000 response | Inflamed | DYRK2 protein_cc        | chr12 | 68042118 | 68059186 | + | 9494  | 3665.859 | 0        | 0.574709 | 0.176148 | 3.262649 | 0.001515 | 0.009673 | 1 |
| ENSG0000 response | Inflamed | TRABD2B protein_cc      | chr1  | 48226200 | 48462567 | - | 7034  | 193.821  | 0.002387 | -0.64766 | 0.19852  | -3.26247 | 0.001516 | 0.009676 | 1 |
| ENSG0000 response | Inflamed | IGF2 protein_cc         | chr11 | 2150342  | 2170833  | - | 6979  | 572.8568 | 0        | -0.7568  | 0.232041 | -3.26149 | 0.001521 | 0.009704 | 1 |
| ENSG0000 response | Inflamed | COL6A4P2 pseudoger      | chr3  | 1.3E+08  | 1.3E+08  | + | 3814  | 19.03341 | 0.100239 | -0.87647 | 0.268762 | -3.26114 | 0.001522 | 0.009713 | 1 |
| ENSG0000 response | Inflamed | GJA1 protein_cc         | chr6  | 1.22E+08 | 1.22E+08 | + | 3037  | 1675.501 | 0        | -0.7624  | 0.2338   | -3.26091 | 0.001524 | 0.009717 | 1 |
| ENSG0000 response | Inflamed | RP11-343 antisense      | chr1  | 2.07E+08 | 2.07E+08 | - | 358   | 0.828162 | 0.794749 | -0.28584 | 0.087669 | -3.2604  | 0.001526 | 0.009731 | 1 |
| ENSG0000 response | Inflamed | MMRN1 protein_cc        | chr4  | 90800683 | 90875780 | + | 5510  | 329.4463 | 0.002387 | -1.04022 | 0.319162 | -3.25923 | 0.001532 | 0.009765 | 1 |
| ENSG0000 response | Inflamed | AC083884 processed_chr7 |       | 74103273 | 74143339 | - | 2851  | 3.109785 | 0.694511 | -0.67132 | 0.205998 | -3.25888 | 0.001533 | 0.009771 | 1 |
| ENSG0000 response | Inflamed | RP11-123J pseudoger     | chr4  | 77807182 | 77807523 | - | 342   | 3.71599  | 0.372315 | 0.485149 | 0.14887  | 3.258873 | 0.001533 | 0.009771 | 1 |
| ENSG0000 response | Inflamed | TMEM53 protein_cc       | chr1  | 45100910 | 45140227 | - | 3635  | 786.6468 | 0        | 0.357223 | 0.10962  | 3.258744 | 0.001534 | 0.009773 | 1 |
| ENSG0000 response | Inflamed | RP11-286E antisense     | chr4  | 1.09E+08 | 1.09E+08 | - | 3099  | 5.949881 | 0.205251 | 0.491775 | 0.150915 | 3.258626 | 0.001535 | 0.009774 | 1 |
| ENSG0000 response | Inflamed | IGHVII-60- IG_V_pseu    | chr14 | 1.07E+08 | 1.07E+08 | - | 256   | 1.558473 | 0.618138 | -0.42927 | 0.131749 | -3.25821 | 0.001537 | 0.009784 | 1 |
| ENSG0000 response | Inflamed | ESR2 protein_cc         | chr14 | 64550950 | 64804830 | - | 9337  | 108.926  | 0.004773 | -0.62382 | 0.191471 | -3.25805 | 0.001537 | 0.009787 | 1 |
| ENSG0000 response | Inflamed | NTN4 protein_cc         | chr12 | 96051583 | 96184930 | - | 4166  | 713.8401 | 0        | 0.496894 | 0.152521 | 3.257877 | 0.001538 | 0.00979  | 1 |
| ENSG0000 response | Inflamed | SLC34A1 protein_cc      | chr5  | 1.77E+08 | 1.77E+08 | + | 4529  | 2.622912 | 0.439141 | -0.51206 | 0.157182 | -3.25774 | 0.001539 | 0.009792 | 1 |
| ENSG0000 response | Inflamed | FAM115C protein_cc      | chr7  | 1.43E+08 | 1.43E+08 | + | 6466  | 194.9332 | 0.002387 | -0.48424 | 0.148656 | -3.25745 | 0.00154  | 0.009799 | 1 |
| ENSG0000 response | Inflamed | HNRNPA1f pseudoger      | chr3  | 39376470 | 39377430 | + | 961   | 16.9642  | 0.150358 | -0.76631 | 0.235265 | -3.25722 | 0.001542 | 0.009804 | 1 |
| ENSG0000 response | Inflamed | ADARB1 protein_cc       | chr21 | 46493768 | 46646478 | + | 10015 | 913.7446 | 0        | -0.51727 | 0.158813 | -3.25713 | 0.001542 | 0.009804 | 1 |
| ENSG0000 response | Inflamed | FFAR4 protein_cc        | chr10 | 95326422 | 95364237 | + | 4060  | 2266.387 | 0        | 0.868509 | 0.266718 | 3.256287 | 0.001546 | 0.009827 | 1 |
| ENSG0000 response | Inflamed | TUBAL3 protein_cc       | chr10 | 5435061  | 5446793  | - | 1798  | 641.8854 | 0.004773 | 0.947387 | 0.29095  | 3.256182 | 0.001547 | 0.009827 | 1 |
| ENSG0000 response | Inflamed | CD22 protein_cc         | chr19 | 35810164 | 35838258 | + | 5839  | 1455.737 | 0        | -1.03394 | 0.317534 | -3.25615 | 0.001547 | 0.009827 | 1 |
| ENSG0000 response | Inflamed | RBBP8NL protein_cc      | chr20 | 60985293 | 61002589 | - | 2793  | 246.6014 | 0.009547 | 0.798042 | 0.24511  | 3.25586  | 0.001548 | 0.009834 | 1 |
| ENSG0000 response | Inflamed | RP11-148C antisense     | chr8  | 11413760 | 11415531 | - | 544   | 2.073986 | 0.670644 | -0.47106 | 0.144699 | -3.25547 | 0.00155  | 0.009844 | 1 |
| ENSG0000 response | Inflamed | MEF2C-AS antisense      | chr5  | 88179145 | 88762215 | + | 5807  | 15.13842 | 0.02148  | -0.51852 | 0.159322 | -3.25457 | 0.001555 | 0.009866 | 1 |
| ENSG0000 response | Inflamed | SKIDA1 protein_cc       | chr10 | 21802407 | 21814611 | - | 6622  | 13.49642 | 0.033413 | -0.60281 | 0.18522  | -3.25455 | 0.001555 | 0.009866 | 1 |
| ENSG0000 response | Inflamed | KCNE4 protein_cc        | chr2  | 2.24E+08 | 2.24E+08 | + | 4124  | 142.0024 | 0.002387 | -0.57555 | 0.17685  | -3.25447 | 0.001555 | 0.009866 | 1 |
| ENSG0000 response | Inflamed | MIR3125 miRNA           | chr2  | 12877493 | 12877570 | + | 78    | 1.045346 | 0.735084 | -0.40648 | 0.124898 | -3.25445 | 0.001555 | 0.009866 | 1 |
| ENSG0000 response | Inflamed | FCGRT protein_cc        | chr19 | 50010073 | 50029590 | + | 4173  | 10647.51 | 0        | 0.348524 | 0.107099 | 3.254221 | 0.001556 | 0.009871 | 1 |
| ENSG0000 response | Inflamed | CITF22-92 lincRNA       | chr22 | 46409486 | 46411378 | + | 1207  | 47.40095 | 0        | 0.31302  | 0.096193 | 3.254077 | 0.001557 | 0.009873 | 1 |
| ENSG0000 response | Inflamed | RP11-22L1 lincRNA       | chr1  | 3223200  | 3226660  | - | 3461  | 30       | 0.026253 | 0.641894 | 0.197272 | 3.253844 | 0.001558 | 0.009878 | 1 |
| ENSG0000 response | Inflamed | FBXO25 protein_cc       | chr8  | 356428   | 421225   | + | 4004  | 662.642  | 0        | 0.320801 | 0.098601 | 3.25351  | 0.00156  | 0.009886 | 1 |
| ENSG0000 response | Inflamed | RP4-555D lincRNA        | chr3  | 44039573 | 44040641 | - | 1069  | 0.98568  | 0.763723 | -0.39382 | 0.121051 | -3.25332 | 0.001561 | 0.009889 | 1 |
| ENSG0000 response | Inflamed | RP11-84C1 antisense     | chr14 | 21463996 | 21467322 | - | 1398  | 12.20048 | 0.360382 | 0.682702 | 0.209851 | 3.253278 | 0.001561 | 0.009889 | 1 |
| ENSG0000 response | Inflamed | AC098614 pseudoger      | chr3  | 27674467 | 27675211 | + | 745   | 38.10979 | 0.002387 | -0.38201 | 0.117427 | -3.25317 | 0.001562 | 0.00989  | 1 |
| ENSG0000 response | Inflamed | GNAL protein_cc         | chr18 | 11688955 | 11885684 | + | 8445  | 277.5012 | 0        | -0.55581 | 0.170862 | -3.25298 | 0.001562 | 0.009893 | 1 |
| ENSG0000 response | Inflamed | TDRD5 protein_cc        | chr1  | 1.8E+08  | 1.8E+08  | + | 4032  | 41.13365 | 0.040573 | 0.809271 | 0.248838 | 3.2522   | 0.001566 | 0.009916 | 1 |

|                   |          |           |                  |          |          |   |       |          |          |          |          |          |          |          |   |
|-------------------|----------|-----------|------------------|----------|----------|---|-------|----------|----------|----------|----------|----------|----------|----------|---|
| ENSG0000 response | Inflamed | TMEM91    | protein_cc chr19 | 41856816 | 41889988 | + | 2796  | 116.0477 | 0        | -0.3902  | 0.119987 | -3.25203 | 0.001567 | 0.009918 | 1 |
| ENSG0000 response | Inflamed | RP11-134L | antisense chr7   | 1.35E+08 | 1.35E+08 | + | 1145  | 132.0024 | 0        | -0.49354 | 0.151766 | -3.25196 | 0.001568 | 0.009918 | 1 |
| ENSG0000 response | Inflamed | TMEM107   | protein_cc chr17 | 8076555  | 8079717  | - | 3163  | 226.2148 | 0        | -0.27048 | 0.083184 | -3.25163 | 0.001569 | 0.009926 | 1 |
| ENSG0000 response | Inflamed | RNF113A   | protein_cc chrX  | 1.19E+08 | 1.19E+08 | - | 1295  | 417.8711 | 0        | -0.23702 | 0.072894 | -3.25157 | 0.00157  | 0.009926 | 1 |
| ENSG0000 response | Inflamed | NMNAT3    | protein_cc chr3  | 1.39E+08 | 1.39E+08 | - | 3451  | 138.5227 | 0        | 0.443586 | 0.136433 | 3.251314 | 0.001571 | 0.009932 | 1 |
| ENSG0000 response | Inflamed | VKORC1    | protein_cc chr16 | 31102163 | 31107301 | - | 2191  | 328.3031 | 0        | -0.36103 | 0.111059 | -3.25077 | 0.001573 | 0.009946 | 1 |
| ENSG0000 response | Inflamed | LINC00483 | processed_chr17  | 48838390 | 48844918 | - | 3663  | 838.0764 | 0.00716  | 0.932209 | 0.286804 | 3.250335 | 0.001576 | 0.009958 | 1 |
| ENSG0000 response | Inflamed | RALGPS1   | protein_cc chr9  | 1.3E+08  | 1.3E+08  | + | 10507 | 1377.26  | 0        | 0.471581 | 0.145107 | 3.249892 | 0.001578 | 0.009969 | 1 |
| ENSG0000 response | Inflamed | SPPL2B    | processed_chr19  | 2328614  | 2355099  | + | 7096  | 4274.936 | 0        | 0.369181 | 0.1136   | 3.249841 | 0.001578 | 0.009969 | 1 |
| ENSG0000 response | Inflamed | PARS2     | protein_cc chr1  | 55222571 | 55230187 | - | 2347  | 338.9356 | 0        | 0.254701 | 0.078379 | 3.249581 | 0.001579 | 0.009974 | 1 |
| ENSG0000 response | Inflamed | USH1C     | protein_cc chr11 | 17515442 | 17565963 | - | 4187  | 5292.396 | 0        | 0.713752 | 0.219669 | 3.249223 | 0.001581 | 0.009983 | 1 |
| ENSG0000 response | Inflamed | HCFC1-AS1 | antisense chrX   | 1.53E+08 | 1.53E+08 | + | 350   | 1.405728 | 0.663484 | -0.43875 | 0.135069 | -3.24831 | 0.001586 | 0.01001  | 1 |
| ENSG0000 response | Inflamed | COL2A1    | protein_cc chr12 | 48366748 | 48398269 | - | 6596  | 50.25537 | 0.038186 | 1.00859  | 0.31055  | 3.247748 | 0.001589 | 0.010025 | 1 |
| ENSG0000 response | Inflamed | RP11-34P1 | lincRNA chr1     | 89295    | 133566   | - | 3569  | 3.651551 | 0.415274 | -0.59384 | 0.18285  | -3.24767 | 0.001589 | 0.010025 | 1 |
| ENSG0000 response | Inflamed | PDIA4     | protein_cc chr7  | 1.49E+08 | 1.49E+08 | - | 3277  | 15493.18 | 0        | -0.32303 | 0.09947  | -3.24754 | 0.00159  | 0.010027 | 1 |
| ENSG0000 response | Inflamed | TRBV6-8   | TR_V_gene chr7   | 1.42E+08 | 1.42E+08 | - | 341   | 2.374702 | 0.505967 | -0.45742 | 0.140857 | -3.24742 | 0.00159  | 0.010028 | 1 |
| ENSG0000 response | Inflamed | DIO2      | protein_cc chr14 | 80663873 | 80854100 | - | 7500  | 273.506  | 0.002387 | -1.12385 | 0.346128 | -3.24692 | 0.001593 | 0.010042 | 1 |
| ENSG0000 response | Inflamed | C11orf96  | protein_cc chr11 | 43946892 | 43965888 | + | 2373  | 1433.484 | 0        | -0.75328 | 0.232017 | -3.24667 | 0.001594 | 0.010048 | 1 |
| ENSG0000 response | Inflamed | MMP15     | protein_cc chr16 | 58059470 | 58080805 | + | 4419  | 9503.897 | 0        | 0.4859   | 0.149673 | 3.246413 | 0.001595 | 0.010053 | 1 |
| ENSG0000 response | Inflamed | RP11-434L | antisense chr3   | 1.29E+08 | 1.29E+08 | + | 565   | 12.1432  | 0.02864  | -0.45629 | 0.140592 | -3.24548 | 0.0016   | 0.010081 | 1 |
| ENSG0000 response | Inflamed | RNF157    | protein_cc chr17 | 74138534 | 74236454 | - | 7802  | 1220.036 | 0        | 0.506601 | 0.156103 | 3.245292 | 0.001601 | 0.010084 | 1 |
| ENSG0000 response | Inflamed | RP11-74E2 | pseudoger chr17  | 2627714  | 2652714  | - | 792   | 1.410501 | 0.668258 | 0.337412 | 0.103975 | 3.245122 | 0.001602 | 0.010087 | 1 |
| ENSG0000 response | Inflamed | PIM1      | protein_cc chr6  | 37137979 | 37143202 | + | 2977  | 2560.971 | 0        | -0.40078 | 0.123513 | -3.24482 | 0.001603 | 0.010095 | 1 |
| ENSG0000 response | Inflamed | SDC2      | protein_cc chr8  | 97505579 | 97624000 | + | 4528  | 1075.368 | 0        | -0.50456 | 0.155513 | -3.24447 | 0.001605 | 0.010103 | 1 |
| ENSG0000 response | Inflamed | GS1-44D2  | (pseudoger chr8  | 70041833 | 70042580 | + | 748   | 12.53222 | 0.040573 | -0.45668 | 0.14079  | -3.24368 | 0.001609 | 0.010126 | 1 |
| ENSG0000 response | Inflamed | RP11-576L | lincRNA chr1     | 2.05E+08 | 2.05E+08 | + | 2885  | 1.183771 | 0.711217 | -0.36576 | 0.112764 | -3.24361 | 0.00161  | 0.010126 | 1 |
| ENSG0000 response | Inflamed | FAM47DP   | pseudoger chrX   | 37400330 | 37404515 | - | 3290  | 1.551313 | 0.684964 | 0.335774 | 0.103527 | 3.243339 | 0.001611 | 0.01013  | 1 |
| ENSG0000 response | Inflamed | PRKD2     | protein_cc chr19 | 47177532 | 47220384 | - | 5446  | 3518.635 | 0        | -0.28538 | 0.087993 | -3.24327 | 0.001611 | 0.01013  | 1 |
| ENSG0000 response | Inflamed | IGHM      | IG_C_gene chr14  | 1.06E+08 | 1.06E+08 | - | 1461  | 103637.3 | 0        | -0.92958 | 0.286618 | -3.24326 | 0.001611 | 0.01013  | 1 |
| ENSG0000 response | Inflamed | RCS1      | protein_cc chr1  | 1.68E+08 | 1.68E+08 | + | 5718  | 1476.387 | 0        | -0.48762 | 0.150355 | -3.24312 | 0.001612 | 0.010132 | 1 |
| ENSG0000 response | Inflamed | FLT1      | protein_cc chr13 | 28874489 | 29069265 | - | 8072  | 880.0358 | 0        | -0.6501  | 0.200472 | -3.24286 | 0.001613 | 0.010138 | 1 |
| ENSG0000 response | Inflamed | KDR       | protein_cc chr4  | 55944644 | 55991756 | - | 6259  | 1277.241 | 0        | -0.76389 | 0.235603 | -3.24225 | 0.001617 | 0.010155 | 1 |
| ENSG0000 response | Inflamed | LMOD3     | protein_cc chr3  | 69156023 | 69172183 | - | 4276  | 3.434368 | 0.408115 | -0.4933  | 0.15215  | -3.24219 | 0.001617 | 0.010155 | 1 |
| ENSG0000 response | Inflamed | TSC22D3   | protein_cc chrX  | 1.07E+08 | 1.07E+08 | - | 4766  | 2179.177 | 0        | -0.63046 | 0.194474 | -3.24187 | 0.001619 | 0.010163 | 1 |
| ENSG0000 response | Inflamed | NCR1      | protein_cc chr19 | 55417508 | 55427508 | + | 1893  | 13.78282 | 0.045346 | -0.5228  | 0.161279 | -3.24157 | 0.00162  | 0.01017  | 1 |
| ENSG0000 response | Inflamed | DMRT2     | protein_cc chr9  | 1050354  | 1057552  | + | 2925  | 96.79475 | 0.02864  | 0.970508 | 0.299423 | 3.241261 | 0.001622 | 0.010175 | 1 |
| ENSG0000 response | Inflamed | RP11-1007 | lincRNA chr15    | 72700119 | 72767509 | - | 2713  | 54.05728 | 0.004773 | 0.299753 | 0.092481 | 3.241255 | 0.001622 | 0.010175 | 1 |
| ENSG0000 response | Inflamed | CCDC85B   | protein_cc chr11 | 65657875 | 65659105 | + | 1231  | 642.821  | 0        | -0.45386 | 0.140043 | -3.24084 | 0.001624 | 0.010186 | 1 |
| ENSG0000 response | Inflamed | PLCL1     | protein_cc chr2  | 1.99E+08 | 1.99E+08 | + | 7925  | 92.6611  | 0.00716  | -0.57364 | 0.177019 | -3.24058 | 0.001625 | 0.010192 | 1 |
| ENSG0000 response | Inflamed | ITGA7     | protein_cc chr12 | 56078352 | 56109827 | - | 6377  | 683.3031 | 0        | -0.65895 | 0.203348 | -3.24052 | 0.001625 | 0.010192 | 1 |

|                   |          |           |                  |          |          |   |      |          |          |          |          |          |          |          |   |
|-------------------|----------|-----------|------------------|----------|----------|---|------|----------|----------|----------|----------|----------|----------|----------|---|
| ENSG0000 response | Inflamed | AVPI1     | protein_cc chr10 | 99437181 | 99447080 | - | 1457 | 899.8162 | 0        | 0.373786 | 0.115351 | 3.240413 | 0.001626 | 0.010193 | 1 |
| ENSG0000 response | Inflamed | VANGL2    | protein_cc chr1  | 1.6E+08  | 1.6E+08  | + | 5340 | 763.4081 | 0.002387 | 0.661972 | 0.2043   | 3.240197 | 0.001627 | 0.010197 | 1 |
| ENSG0000 response | Inflamed | KHDC1     | protein_cc chr6  | 73951037 | 74020088 | - | 3319 | 34.6969  | 0.002387 | -0.40941 | 0.126355 | -3.24012 | 0.001628 | 0.010197 | 1 |
| ENSG0000 response | Inflamed | MAMDC2-   | antisense chr9   | 72700732 | 72790804 | - | 7244 | 12.03103 | 0.071599 | 0.615749 | 0.190052 | 3.239893 | 0.001629 | 0.010202 | 1 |
| ENSG0000 response | Inflamed | SH2D3A    | protein_cc chr19 | 6752171  | 6767599  | - | 5716 | 1579.1   | 0        | 0.368325 | 0.113692 | 3.239681 | 0.00163  | 0.010207 | 1 |
| ENSG0000 response | Inflamed | GSG2      | protein_cc chr17 | 3627211  | 3630067  | + | 2857 | 144.7494 | 0.00716  | -0.53802 | 0.16608  | -3.23955 | 0.00163  | 0.010208 | 1 |
| ENSG0000 response | Inflamed | RDX       | protein_cc chr11 | 1.1E+08  | 1.1E+08  | - | 6588 | 620.0024 | 0        | -0.6935  | 0.214189 | -3.23778 | 0.00164  | 0.010263 | 1 |
| ENSG0000 response | Inflamed | IGLV10-54 | IG_V_gene chr22  | 22569184 | 22569660 | + | 365  | 2372.797 | 0.00716  | -1.02703 | 0.317286 | -3.23692 | 0.001644 | 0.010287 | 1 |
| ENSG0000 response | Inflamed | RP13-152C | antisense chr20  | 62688156 | 62688437 | + | 188  | 3.305489 | 0.329356 | -0.51225 | 0.158253 | -3.23691 | 0.001644 | 0.010287 | 1 |
| ENSG0000 response | Inflamed | RP4-673M  | antisense chr7   | 44924552 | 44925992 | + | 1441 | 16.08592 | 0.009547 | -0.36459 | 0.112648 | -3.23651 | 0.001646 | 0.010297 | 1 |
| ENSG0000 response | Inflamed | CDHR5     | protein_cc chr11 | 616565   | 626078   | - | 3873 | 19070.65 | 0        | 0.85892  | 0.265471 | 3.235455 | 0.001652 | 0.010329 | 1 |
| ENSG0000 response | Inflamed | ATP9A     | protein_cc chr20 | 50213053 | 50385173 | - | 8317 | 5574.496 | 0        | 0.51802  | 0.160135 | 3.234901 | 0.001655 | 0.010341 | 1 |
| ENSG0000 response | Inflamed | AC000078  | pseudoger chr22  | 19874812 | 19875493 | + | 682  | 1.174224 | 0.727924 | -0.36481 | 0.112774 | -3.23487 | 0.001655 | 0.010341 | 1 |
| ENSG0000 response | Inflamed | SIRT5     | protein_cc chr6  | 13574816 | 13614790 | + | 5368 | 582.6468 | 0        | 0.322305 | 0.099635 | 3.234873 | 0.001655 | 0.010341 | 1 |
| ENSG0000 response | Inflamed | MARVELD3  | protein_cc chr16 | 71660064 | 71676017 | + | 6446 | 2650.506 | 0        | 0.739175 | 0.228602 | 3.233466 | 0.001662 | 0.010385 | 1 |
| ENSG0000 response | Inflamed | APOH      | protein_cc chr17 | 64208151 | 64252643 | - | 1332 | 3.856802 | 0.451074 | 0.57195  | 0.17689  | 3.233372 | 0.001663 | 0.010385 | 1 |
| ENSG0000 response | Inflamed | COQ3      | protein_cc chr6  | 99817276 | 99842080 | - | 1458 | 191.8043 | 0        | 0.407304 | 0.125977 | 3.233163 | 0.001664 | 0.01039  | 1 |
| ENSG0000 response | Inflamed | AK8       | protein_cc chr9  | 1.36E+08 | 1.36E+08 | - | 2731 | 19.12411 | 0.00716  | -0.52605 | 0.162717 | -3.2329  | 0.001665 | 0.010396 | 1 |
| ENSG0000 response | Inflamed | CCR10     | protein_cc chr17 | 40830907 | 40835935 | - | 2619 | 151.8258 | 0        | -0.68749 | 0.212703 | -3.23217 | 0.001669 | 0.010417 | 1 |
| ENSG0000 response | Inflamed | MME       | protein_cc chr3  | 1.55E+08 | 1.55E+08 | + | 9566 | 520.5274 | 0.002387 | -1.03735 | 0.321043 | -3.2312  | 0.001674 | 0.010447 | 1 |
| ENSG0000 response | Inflamed | CEACAM15  | protein_cc chr19 | 45165545 | 45187631 | + | 5202 | 281.3055 | 0.004773 | 0.645632 | 0.199837 | 3.230795 | 0.001676 | 0.010458 | 1 |
| ENSG0000 response | Inflamed | DCLK3     | protein_cc chr3  | 36753913 | 36781352 | - | 5406 | 35.60621 | 0.02864  | -0.64731 | 0.200367 | -3.23061 | 0.001677 | 0.010461 | 1 |
| ENSG0000 response | Inflamed | RAI14     | protein_cc chr5  | 34656342 | 34832732 | + | 7702 | 1007.647 | 0        | -0.64761 | 0.200473 | -3.23043 | 0.001678 | 0.010465 | 1 |
| ENSG0000 response | Inflamed | HYKK      | protein_cc chr15 | 78799906 | 78829714 | + | 2732 | 75.3747  | 0        | 0.324505 | 0.100464 | 3.230059 | 0.00168  | 0.010474 | 1 |
| ENSG0000 response | Inflamed | SLC45A2   | protein_cc chr5  | 33944721 | 33984835 | - | 3269 | 12.43437 | 0.329356 | 0.783439 | 0.242551 | 3.229998 | 0.00168  | 0.010474 | 1 |
| ENSG0000 response | Inflamed | RP11-475C | lincRNA chr1     | 84041459 | 84326706 | - | 5425 | 3.252983 | 0.295943 | 0.42292  | 0.130967 | 3.229223 | 0.001685 | 0.010497 | 1 |
| ENSG0000 response | Inflamed | TRGC1     | TR_C_gene chr7   | 38297480 | 38305279 | - | 2730 | 50.76372 | 0.004773 | -0.60996 | 0.188914 | -3.2288  | 0.001687 | 0.010509 | 1 |
| ENSG0000 response | Inflamed | PDXP      | protein_cc chr22 | 38054734 | 38062941 | + | 2203 | 101.6683 | 0        | 0.428716 | 0.132798 | 3.228322 | 0.001689 | 0.010522 | 1 |
| ENSG0000 response | Inflamed | CTD-2357  | lincRNA chr17    | 76613471 | 76628139 | - | 1271 | 4.620525 | 0.291169 | -0.51321 | 0.159001 | -3.22773 | 0.001693 | 0.01054  | 1 |
| ENSG0000 response | Inflamed | TM4SF18   | protein_cc chr3  | 1.49E+08 | 1.49E+08 | - | 4482 | 149.8902 | 0.002387 | -0.62679 | 0.194198 | -3.22758 | 0.001693 | 0.010542 | 1 |
| ENSG0000 response | Inflamed | NETO2     | protein_cc chr16 | 47111614 | 47177908 | - | 7481 | 554.926  | 0        | -0.5966  | 0.184848 | -3.22749 | 0.001694 | 0.010542 | 1 |
| ENSG0000 response | Inflamed | JUN       | protein_cc chr1  | 59246465 | 59249785 | - | 3321 | 5560.384 | 0        | 0.463931 | 0.143752 | 3.227295 | 0.001695 | 0.010546 | 1 |
| ENSG0000 response | Inflamed | MEP1A     | protein_cc chr6  | 46761127 | 46807515 | + | 2892 | 6999.162 | 0        | 1.000414 | 0.309995 | 3.227194 | 0.001695 | 0.010547 | 1 |
| ENSG0000 response | Inflamed | CELF3     | protein_cc chr1  | 1.52E+08 | 1.52E+08 | - | 4439 | 58.50119 | 0.033413 | 0.835931 | 0.25905  | 3.226908 | 0.001697 | 0.010554 | 1 |
| ENSG0000 response | Inflamed | B9D1      | protein_cc chr17 | 19240867 | 19281495 | - | 3522 | 216.6563 | 0        | -0.41448 | 0.128459 | -3.22656 | 0.001699 | 0.010563 | 1 |
| ENSG0000 response | Inflamed | MTMR14    | protein_cc chr3  | 9691117  | 9744077  | + | 6019 | 1921.73  | 0        | -0.1339  | 0.041503 | -3.22621 | 0.001701 | 0.010573 | 1 |
| ENSG0000 response | Inflamed | SNX7      | protein_cc chr1  | 99127236 | 99226056 | + | 2088 | 960.58   | 0        | 0.329773 | 0.10225  | 3.225158 | 0.001706 | 0.010605 | 1 |
| ENSG0000 response | Inflamed | SLC35D1   | protein_cc chr1  | 67465015 | 67519782 | - | 7154 | 4387.673 | 0        | 0.617482 | 0.191464 | 3.225065 | 0.001707 | 0.010606 | 1 |
| ENSG0000 response | Inflamed | HLA-DMB   | protein_cc chr6  | 32902406 | 32908847 | - | 4655 | 2439.411 | 0        | -0.43969 | 0.13634  | -3.22494 | 0.001708 | 0.010608 | 1 |
| ENSG0000 response | Inflamed | IL36RN    | protein_cc chr2  | 1.14E+08 | 1.14E+08 | + | 3299 | 5.300716 | 0.577566 | -0.82149 | 0.25475  | -3.22468 | 0.001709 | 0.010614 | 1 |

|                   |          |           |                  |          |          |   |       |          |          |          |          |          |          |          |   |
|-------------------|----------|-----------|------------------|----------|----------|---|-------|----------|----------|----------|----------|----------|----------|----------|---|
| ENSG0000 response | Inflamed | TSPAN33   | protein_cc chr7  | 1.29E+08 | 1.29E+08 | + | 2496  | 893.1551 | 0        | -0.34842 | 0.108064 | -3.22419 | 0.001712 | 0.010628 | 1 |
| ENSG0000 response | Inflamed | CTC-303L1 | pseudoger chr5   | 93928473 | 93930496 | + | 2024  | 1.455847 | 0.670644 | 0.428966 | 0.133053 | 3.22403  | 0.001712 | 0.010631 | 1 |
| ENSG0000 response | Inflamed | STARD3    | protein_cc chr17 | 37793318 | 37819737 | + | 5160  | 1821.012 | 0        | -0.20934 | 0.064941 | -3.22358 | 0.001715 | 0.010643 | 1 |
| ENSG0000 response | Inflamed | TBXA2R    | protein_cc chr19 | 3594504  | 3606838  | - | 2793  | 112.7279 | 0.00716  | -0.6817  | 0.211492 | -3.22329 | 0.001716 | 0.01065  | 1 |
| ENSG0000 response | Inflamed | UGT2B15   | protein_cc chr4  | 69512348 | 69536346 | - | 2077  | 922.7518 | 0.02148  | 1.160524 | 0.3601   | 3.222781 | 0.001719 | 0.010665 | 1 |
| ENSG0000 response | Inflamed | RP11-543I | lincRNA chr1     | 48154135 | 48169055 | + | 815   | 2.062053 | 0.568019 | 0.51346  | 0.159342 | 3.222385 | 0.001721 | 0.010675 | 1 |
| ENSG0000 response | Inflamed | LINC00085 | processed_chr19  | 52196593 | 52215640 | + | 3648  | 56.49881 | 0        | -0.55408 | 0.171951 | -3.22233 | 0.001722 | 0.010675 | 1 |
| ENSG0000 response | Inflamed | C8orf31   | protein_cc chr8  | 1.44E+08 | 1.44E+08 | + | 2929  | 23.56086 | 0.01432  | -0.58617 | 0.181929 | -3.22199 | 0.001724 | 0.010684 | 1 |
| ENSG0000 response | Inflamed | ATP6V1E2  | protein_cc chr2  | 46717889 | 46769696 | - | 5283  | 104.568  | 0        | -0.32111 | 0.099681 | -3.22136 | 0.001727 | 0.010703 | 1 |
| ENSG0000 response | Inflamed | AP000438  | antisense chr11  | 62677018 | 62685833 | + | 749   | 3.398568 | 0.312649 | 0.463932 | 0.144023 | 3.22123  | 0.001728 | 0.010705 | 1 |
| ENSG0000 response | Inflamed | EMCN      | protein_cc chr4  | 1.01E+08 | 1.02E+08 | - | 5243  | 183.4511 | 0        | -0.60744 | 0.188662 | -3.21974 | 0.001736 | 0.010752 | 1 |
| ENSG0000 response | Inflamed | BTNL8     | protein_cc chr5  | 1.8E+08  | 1.8E+08  | + | 3924  | 1857.098 | 0        | 0.749476 | 0.232851 | 3.218691 | 0.001742 | 0.010786 | 1 |
| ENSG0000 response | Inflamed | KRT72     | protein_cc chr12 | 52979373 | 52995322 | - | 2154  | 8.694511 | 0.315036 | -0.6867  | 0.213355 | -3.21858 | 0.001742 | 0.010787 | 1 |
| ENSG0000 response | Inflamed | SMIM6     | protein_cc chr17 | 73642323 | 73644057 | + | 1086  | 208.7208 | 0.004773 | 0.683669 | 0.212457 | 3.217915 | 0.001746 | 0.010807 | 1 |
| ENSG0000 response | Inflamed | KBTD11-1  | lincRNA chr8     | 1919563  | 1924644  | + | 815   | 46.86874 | 0.011933 | 0.613669 | 0.190736 | 3.217381 | 0.001749 | 0.010823 | 1 |
| ENSG0000 response | Inflamed | AC006538  | sense_intr chr19 | 2727741  | 2729325  | - | 1585  | 10.25537 | 0.038186 | -0.45518 | 0.141501 | -3.2168  | 0.001752 | 0.010838 | 1 |
| ENSG0000 response | Inflamed | KCNV1     | protein_cc chr8  | 1.11E+08 | 1.11E+08 | - | 6979  | 58.43675 | 0.116945 | 0.963137 | 0.299409 | 3.216799 | 0.001752 | 0.010838 | 1 |
| ENSG0000 response | Inflamed | OBP2A     | protein_cc chr9  | 1.38E+08 | 1.38E+08 | + | 1018  | 3.47494  | 0.687351 | -0.58905 | 0.18314  | -3.21638 | 0.001754 | 0.010849 | 1 |
| ENSG0000 response | Inflamed | HADH      | protein_cc chr4  | 1.09E+08 | 1.09E+08 | + | 3084  | 3681.974 | 0        | 0.410657 | 0.127686 | 3.216139 | 0.001756 | 0.010855 | 1 |
| ENSG0000 response | Inflamed | CLIC2     | protein_cc chrX  | 1.55E+08 | 1.55E+08 | - | 2840  | 351.8401 | 0        | -0.51172 | 0.159116 | -3.21604 | 0.001756 | 0.010856 | 1 |
| ENSG0000 response | Inflamed | CCDC24    | protein_cc chr1  | 44457031 | 44462200 | + | 3554  | 427.8377 | 0        | 0.324675 | 0.10096  | 3.215888 | 0.001757 | 0.010858 | 1 |
| ENSG0000 response | Inflamed | RASSF4    | protein_cc chr10 | 45454855 | 45491339 | + | 9481  | 2002.878 | 0        | -0.37414 | 0.116348 | -3.21572 | 0.001758 | 0.010862 | 1 |
| ENSG0000 response | Inflamed | FAM86C2F  | pseudoger chr11  | 67559119 | 67572807 | - | 3402  | 130.9857 | 0        | 0.31456  | 0.097847 | 3.214821 | 0.001763 | 0.01089  | 1 |
| ENSG0000 response | Inflamed | SERPINA7  | protein_cc chrX  | 1.05E+08 | 1.05E+08 | - | 1980  | 1.038186 | 0.794749 | 0.29515  | 0.091823 | 3.214345 | 0.001766 | 0.010903 | 1 |
| ENSG0000 response | Inflamed | CEP170B   | protein_cc chr14 | 1.05E+08 | 1.05E+08 | + | 7199  | 10010.15 | 0        | 0.473422 | 0.147286 | 3.214297 | 0.001766 | 0.010903 | 1 |
| ENSG0000 response | Inflamed | AC126365  | pseudoger chr17  | 20619794 | 20640440 | + | 1500  | 1.945107 | 0.572792 | -0.48069 | 0.149555 | -3.21411 | 0.001767 | 0.010907 | 1 |
| ENSG0000 response | Inflamed | DIAPH2-AS | antisense chrX   | 96686285 | 96897588 | - | 2309  | 2.429594 | 0.5179   | -0.52248 | 0.162565 | -3.21396 | 0.001768 | 0.010908 | 1 |
| ENSG0000 response | Inflamed | STEAP1    | protein_cc chr7  | 89783689 | 89794143 | + | 1625  | 501.1742 | 0        | -0.48833 | 0.151943 | -3.21393 | 0.001768 | 0.010908 | 1 |
| ENSG0000 response | Inflamed | RP11-451M | protein_cc chr10 | 1.12E+08 | 1.12E+08 | - | 1663  | 15.21718 | 0.019093 | 0.541295 | 0.168434 | 3.213701 | 0.001769 | 0.010913 | 1 |
| ENSG0000 response | Inflamed | PRPF31    | protein_cc chr19 | 54618837 | 54635140 | + | 2616  | 1598.033 | 0        | -0.20743 | 0.064556 | -3.21315 | 0.001772 | 0.010929 | 1 |
| ENSG0000 response | Inflamed | RP11-416C | lincRNA chr3     | 1.82E+08 | 1.82E+08 | + | 12085 | 1.613365 | 0.682578 | -0.50616 | 0.157534 | -3.213   | 0.001773 | 0.010929 | 1 |
| ENSG0000 response | Inflamed | GPR55     | protein_cc chr2  | 2.32E+08 | 2.32E+08 | - | 4130  | 194.2959 | 0.002387 | -0.56729 | 0.176561 | -3.213   | 0.001773 | 0.010929 | 1 |
| ENSG0000 response | Inflamed | TPM1      | protein_cc chr15 | 63334831 | 63364114 | + | 8468  | 9524.317 | 0        | 0.318212 | 0.099059 | 3.21236  | 0.001777 | 0.010949 | 1 |
| ENSG0000 response | Inflamed | FOXD4L1   | protein_cc chr2  | 1.14E+08 | 1.14E+08 | + | 2068  | 4.725537 | 0.27685  | -0.51346 | 0.159866 | -3.21182 | 0.00178  | 0.010965 | 1 |
| ENSG0000 response | Inflamed | CREM      | protein_cc chr10 | 35415719 | 35501886 | + | 5695  | 376.0979 | 0        | -0.38376 | 0.119501 | -3.21131 | 0.001783 | 0.010977 | 1 |
| ENSG0000 response | Inflamed | SAMD11    | protein_cc chr1  | 860260   | 879955   | + | 3205  | 499.1146 | 0        | -0.46571 | 0.145023 | -3.21131 | 0.001783 | 0.010977 | 1 |
| ENSG0000 response | Inflamed | FAM71E1   | protein_cc chr19 | 50970042 | 50980010 | - | 1566  | 47.27446 | 0        | 0.352469 | 0.109761 | 3.211239 | 0.001783 | 0.010977 | 1 |
| ENSG0000 response | Inflamed | TLL1      | protein_cc chr4  | 1.67E+08 | 1.67E+08 | + | 7522  | 72.87112 | 0.02148  | -0.71344 | 0.222178 | -3.21112 | 0.001784 | 0.010979 | 1 |
| ENSG0000 response | Inflamed | SLC17A4   | protein_cc chr6  | 25754927 | 25781419 | + | 4633  | 1489.36  | 0.00716  | 1.201654 | 0.374259 | 3.210754 | 0.001786 | 0.010989 | 1 |
| ENSG0000 response | Inflamed | UNC5A     | protein_cc chr5  | 1.76E+08 | 1.76E+08 | + | 4357  | 14.66826 | 0.121718 | -0.85141 | 0.265195 | -3.2105  | 0.001787 | 0.010993 | 1 |

|                   |          |           |                  |          |          |   |       |          |          |          |          |          |          |          |   |
|-------------------|----------|-----------|------------------|----------|----------|---|-------|----------|----------|----------|----------|----------|----------|----------|---|
| ENSG0000 response | Inflamed | RNF149    | protein_cc chr2  | 1.02E+08 | 1.02E+08 | - | 4836  | 2637.313 | 0        | -0.43241 | 0.134686 | -3.2105  | 0.001787 | 0.010993 | 1 |
| ENSG0000 response | Inflamed | FBXO27    | protein_cc chr19 | 39481354 | 39523425 | - | 2833  | 40.36754 | 0.00716  | -0.46142 | 0.143733 | -3.21027 | 0.001788 | 0.010998 | 1 |
| ENSG0000 response | Inflamed | TPSAB1    | protein_cc chr16 | 1290697  | 1292555  | + | 1512  | 3118.747 | 0        | -0.60217 | 0.187597 | -3.20992 | 0.00179  | 0.011008 | 1 |
| ENSG0000 response | Inflamed | GAMT      | protein_cc chr19 | 1397091  | 1401569  | - | 1739  | 122.4797 | 0        | -0.56969 | 0.177486 | -3.20977 | 0.001791 | 0.011008 | 1 |
| ENSG0000 response | Inflamed | PLK3      | protein_cc chr1  | 45265897 | 45271662 | + | 3479  | 633.6253 | 0        | -0.47503 | 0.147997 | -3.20971 | 0.001792 | 0.011008 | 1 |
| ENSG0000 response | Inflamed | MIR429    | miRNA chr1       | 1104385  | 1104467  | + | 83    | 49.8401  | 0.026253 | 0.711916 | 0.221802 | 3.209692 | 0.001792 | 0.011008 | 1 |
| ENSG0000 response | Inflamed | RP11-18H7 | lincRNA chr4     | 1.53E+08 | 1.53E+08 | - | 787   | 1.756563 | 0.572792 | -0.42434 | 0.132235 | -3.20895 | 0.001796 | 0.011031 | 1 |
| ENSG0000 response | Inflamed | RP11-428C | lincRNA chr12    | 32030013 | 32040137 | - | 852   | 10.08592 | 0.26969  | -0.76675 | 0.238963 | -3.20866 | 0.001797 | 0.011038 | 1 |
| ENSG0000 response | Inflamed | RP3-510D  | lincRNA chr1     | 9242263  | 9252148  | + | 985   | 13.65632 | 0.038186 | -0.49431 | 0.15406  | -3.20856 | 0.001798 | 0.011039 | 1 |
| ENSG0000 response | Inflamed | TSC22D1   | protein_cc chr13 | 45007655 | 45151283 | - | 7159  | 9495.809 | 0        | 0.362488 | 0.112996 | 3.207965 | 0.001801 | 0.011057 | 1 |
| ENSG0000 response | Inflamed | LIN37     | protein_cc chr19 | 36239262 | 36245420 | + | 2820  | 209.9499 | 0        | -0.19596 | 0.061093 | -3.20756 | 0.001804 | 0.011069 | 1 |
| ENSG0000 response | Inflamed | DNAJA4    | protein_cc chr15 | 78556428 | 78574538 | + | 6591  | 2328.413 | 0        | 0.387005 | 0.120678 | 3.206933 | 0.001807 | 0.011088 | 1 |
| ENSG0000 response | Inflamed | LEPREL2   | polymorph chr12  | 6937572  | 6949018  | + | 4606  | 636.1885 | 0        | -0.51209 | 0.159702 | -3.20654 | 0.00181  | 0.011099 | 1 |
| ENSG0000 response | Inflamed | BFSP1     | protein_cc chr20 | 17474550 | 17549865 | - | 3361  | 28.84248 | 0.002387 | -0.42704 | 0.133188 | -3.20633 | 0.001811 | 0.011104 | 1 |
| ENSG0000 response | Inflamed | RP11-187C | lincRNA chr14    | 76961706 | 77193055 | - | 632   | 3.190931 | 0.369928 | -0.45794 | 0.142854 | -3.20567 | 0.001814 | 0.011123 | 1 |
| ENSG0000 response | Inflamed | NUDT10    | protein_cc chrX  | 51075083 | 51080377 | + | 2054  | 16.71599 | 0.026253 | -0.57149 | 0.178276 | -3.20562 | 0.001815 | 0.011123 | 1 |
| ENSG0000 response | Inflamed | CHGA      | protein_cc chr14 | 93389425 | 93401638 | + | 3102  | 11464.99 | 0        | 1.23016  | 0.383758 | 3.20556  | 0.001815 | 0.011123 | 1 |
| ENSG0000 response | Inflamed | CTD-2377C | (antisense) chr5 | 74161718 | 74163679 | + | 1962  | 3.331742 | 0.291169 | 0.453823 | 0.141596 | 3.205062 | 0.001818 | 0.011138 | 1 |
| ENSG0000 response | Inflamed | C14orf93  | protein_cc chr14 | 23456110 | 23479375 | - | 3250  | 394.957  | 0        | 0.210408 | 0.065653 | 3.204858 | 0.001819 | 0.011143 | 1 |
| ENSG0000 response | Inflamed | SOBP      | protein_cc chr6  | 1.08E+08 | 1.08E+08 | + | 5774  | 210.8496 | 0.002387 | -0.55093 | 0.171932 | -3.20437 | 0.001822 | 0.011157 | 1 |
| ENSG0000 response | Inflamed | DDAH2     | protein_cc chr6  | 31694815 | 31698394 | - | 2538  | 2143.811 | 0        | 0.281476 | 0.087853 | 3.203957 | 0.001824 | 0.011167 | 1 |
| ENSG0000 response | Inflamed | RP11-122A | protein_cc chr8  | 91970865 | 91997485 | - | 894   | 27.60859 | 0.004773 | -0.48404 | 0.151078 | -3.20394 | 0.001824 | 0.011167 | 1 |
| ENSG0000 response | Inflamed | KCNA2     | protein_cc chr1  | 1.11E+08 | 1.11E+08 | - | 4013  | 67.358   | 0.02148  | -0.77922 | 0.243218 | -3.2038  | 0.001825 | 0.011169 | 1 |
| ENSG0000 response | Inflamed | RRM2      | protein_cc chr2  | 10262455 | 10271545 | + | 4954  | 2046.955 | 0        | -0.45515 | 0.142123 | -3.2025  | 0.001833 | 0.011212 | 1 |
| ENSG0000 response | Inflamed | U47924.25 | antisense chr12  | 7074112  | 7074545  | + | 434   | 4.699284 | 0.212411 | 0.455582 | 0.142271 | 3.20221  | 0.001834 | 0.01122  | 1 |
| ENSG0000 response | Inflamed | CARD6     | protein_cc chr5  | 40841286 | 40860275 | + | 4397  | 428.4988 | 0        | -0.59205 | 0.184893 | -3.20214 | 0.001835 | 0.01122  | 1 |
| ENSG0000 response | Inflamed | NTRK3     | protein_cc chr15 | 88418230 | 88799999 | - | 9078  | 64.02864 | 0.02148  | 1.006725 | 0.314419 | 3.201858 | 0.001836 | 0.011227 | 1 |
| ENSG0000 response | Inflamed | MIF       | protein_cc chr22 | 24236191 | 24237414 | + | 1109  | 2893.979 | 0        | -0.38828 | 0.121271 | -3.20179 | 0.001837 | 0.011227 | 1 |
| ENSG0000 response | Inflamed | ANKRD44   | protein_cc chr2  | 1.98E+08 | 1.98E+08 | - | 9228  | 352.821  | 0.002387 | -0.68307 | 0.213355 | -3.20156 | 0.001838 | 0.011232 | 1 |
| ENSG0000 response | Inflamed | PEX26     | protein_cc chr22 | 18560689 | 18613905 | + | 20042 | 7426.169 | 0        | 0.42495  | 0.132771 | 3.200628 | 0.001843 | 0.011263 | 1 |
| ENSG0000 response | Inflamed | NAP1L1    | protein_cc chr12 | 76438670 | 76478813 | - | 9052  | 4185.203 | 0        | -0.42895 | 0.134039 | -3.20014 | 0.001846 | 0.011276 | 1 |
| ENSG0000 response | Inflamed | EXTL3     | protein_cc chr8  | 28457986 | 28613116 | + | 13220 | 2091.907 | 0        | -0.34132 | 0.10666  | -3.20005 | 0.001847 | 0.011276 | 1 |
| ENSG0000 response | Inflamed | CTD-2540L | lincRNA chr14    | 71075515 | 71108015 | - | 2941  | 3.24105  | 0.484487 | -0.56317 | 0.175991 | -3.20002 | 0.001847 | 0.011276 | 1 |
| ENSG0000 response | Inflamed | LOR       | protein_cc chr1  | 1.53E+08 | 1.53E+08 | + | 1230  | 1.670644 | 0.646778 | -0.43039 | 0.134513 | -3.1996  | 0.001849 | 0.011289 | 1 |
| ENSG0000 response | Inflamed | CXCR4     | protein_cc chr2  | 1.37E+08 | 1.37E+08 | - | 2224  | 1297.604 | 0        | -0.66457 | 0.207739 | -3.19909 | 0.001852 | 0.011304 | 1 |
| ENSG0000 response | Inflamed | RP11-610F | lincRNA chr4     | 1.52E+08 | 1.52E+08 | - | 358   | 13.20286 | 0.083532 | 0.60072  | 0.187808 | 3.198582 | 0.001855 | 0.01132  | 1 |
| ENSG0000 response | Inflamed | EMILIN1   | protein_cc chr2  | 27301435 | 27309271 | + | 3953  | 7749.062 | 0        | -0.54721 | 0.171083 | -3.19849 | 0.001856 | 0.01132  | 1 |
| ENSG0000 response | Inflamed | RER1      | protein_cc chr1  | 2323267  | 2336883  | + | 5638  | 6658.883 | 0        | 0.130586 | 0.04083  | 3.198323 | 0.001857 | 0.011324 | 1 |
| ENSG0000 response | Inflamed | ABCB6     | protein_cc chr2  | 2.2E+08  | 2.2E+08  | - | 5205  | 178.7685 | 0        | -0.31906 | 0.099767 | -3.19803 | 0.001859 | 0.011331 | 1 |
| ENSG0000 response | Inflamed | RP11-10N  | lincRNA chr1     | 24526730 | 24538183 | + | 1849  | 10.3031  | 0.181384 | 0.750053 | 0.234546 | 3.197894 | 0.001859 | 0.011334 | 1 |

|                   |          |           |                  |          |          |   |      |          |          |          |          |          |          |          |   |
|-------------------|----------|-----------|------------------|----------|----------|---|------|----------|----------|----------|----------|----------|----------|----------|---|
| ENSG0000 response | Inflamed | TDP2      | protein_cc chr6  | 24650205 | 24667261 | - | 3082 | 4682.282 | 0        | 0.55626  | 0.173987 | 3.19713  | 0.001864 | 0.011358 | 1 |
| ENSG0000 response | Inflamed | NR112     | protein_cc chr3  | 1.19E+08 | 1.2E+08  | + | 5381 | 1904.076 | 0.002387 | 0.835736 | 0.261466 | 3.196349 | 0.001868 | 0.011383 | 1 |
| ENSG0000 response | Inflamed | MIOX      | protein_cc chr22 | 50925213 | 50929077 | + | 1796 | 5.892601 | 0.221957 | -0.5688  | 0.178032 | -3.19494 | 0.001877 | 0.011431 | 1 |
| ENSG0000 response | Inflamed | AL122127. | miRNA chr14      | 1.06E+08 | 1.06E+08 | - | 60   | 10.20048 | 0.193317 | -0.76434 | 0.239309 | -3.19394 | 0.001883 | 0.011465 | 1 |
| ENSG0000 response | Inflamed | APOL3     | protein_cc chr22 | 36536372 | 36562225 | - | 5990 | 1488.265 | 0        | -0.51957 | 0.162687 | -3.19365 | 0.001884 | 0.011472 | 1 |
| ENSG0000 response | Inflamed | BDNF      | protein_cc chr11 | 27676440 | 27743605 | - | 7740 | 35.54654 | 0.033413 | -0.79509 | 0.24902  | -3.19288 | 0.001889 | 0.011497 | 1 |
| ENSG0000 response | Inflamed | MYO3B     | protein_cc chr2  | 1.71E+08 | 1.72E+08 | + | 8236 | 19.01671 | 0.066826 | -0.65862 | 0.206282 | -3.1928  | 0.001889 | 0.011497 | 1 |
| ENSG0000 response | Inflamed | CTD-2353F | antisense chr5   | 36666316 | 36725297 | - | 1159 | 11.15513 | 0.081146 | -0.52136 | 0.163297 | -3.1927  | 0.00189  | 0.011498 | 1 |
| ENSG0000 response | Inflamed | TNFAIP1   | protein_cc chr17 | 26662628 | 26674035 | + | 3889 | 2595.57  | 0        | -0.26248 | 0.08224  | -3.19163 | 0.001896 | 0.011534 | 1 |
| ENSG0000 response | Inflamed | AXIN2     | protein_cc chr17 | 63524681 | 63557765 | - | 5196 | 1191.542 | 0        | 0.581106 | 0.182079 | 3.191501 | 0.001897 | 0.011536 | 1 |
| ENSG0000 response | Inflamed | FAM127A   | protein_cc chrX  | 1.34E+08 | 1.34E+08 | + | 1244 | 1886.098 | 0        | -0.29689 | 0.09303  | -3.19134 | 0.001898 | 0.01154  | 1 |
| ENSG0000 response | Inflamed | RP11-390F | lincRNA chr9     | 6645956  | 6670635  | + | 526  | 3.157518 | 0.346062 | -0.48291 | 0.15136  | -3.19047 | 0.001903 | 0.011568 | 1 |
| ENSG0000 response | Inflamed | LINC00925 | lincRNA chr15    | 89904810 | 89939471 | + | 5018 | 31.04773 | 0.01432  | -0.62716 | 0.196612 | -3.18984 | 0.001907 | 0.011589 | 1 |
| ENSG0000 response | Inflamed | KRT12     | protein_cc chr17 | 39017555 | 39023462 | - | 1867 | 68.76372 | 0.02148  | 0.90026  | 0.282239 | 3.189702 | 0.001908 | 0.011591 | 1 |
| ENSG0000 response | Inflamed | GIMAP8    | protein_cc chr7  | 1.5E+08  | 1.5E+08  | + | 4184 | 1036.446 | 0        | -0.54176 | 0.169865 | -3.18936 | 0.00191  | 0.011601 | 1 |
| ENSG0000 response | Inflamed | ZACN      | protein_cc chr17 | 74068042 | 74079747 | + | 4307 | 8.420048 | 0.112172 | -0.58448 | 0.183283 | -3.18894 | 0.001912 | 0.011613 | 1 |
| ENSG0000 response | Inflamed | UQCR10    | protein_cc chr22 | 30163358 | 30166402 | + | 975  | 2980.21  | 0        | 0.401682 | 0.125969 | 3.188725 | 0.001914 | 0.011618 | 1 |
| ENSG0000 response | Inflamed | ADAT3     | protein_cc chr19 | 1905377  | 1913444  | + | 2235 | 370.8663 | 0        | 0.306598 | 0.096164 | 3.18829  | 0.001916 | 0.011632 | 1 |
| ENSG0000 response | Inflamed | LDB2      | protein_cc chr4  | 16503164 | 16900432 | - | 5586 | 468.6325 | 0        | -0.54436 | 0.170742 | -3.18821 | 0.001917 | 0.011632 | 1 |
| ENSG0000 response | Inflamed | TMEM141   | protein_cc chr9  | 1.4E+08  | 1.4E+08  | + | 1443 | 2272.165 | 0        | 0.449936 | 0.141143 | 3.187805 | 0.001919 | 0.011644 | 1 |
| ENSG0000 response | Inflamed | MOB3B     | protein_cc chr9  | 27325207 | 27529779 | - | 7087 | 2426.031 | 0        | 0.449695 | 0.141123 | 3.186543 | 0.001927 | 0.011687 | 1 |
| ENSG0000 response | Inflamed | WWC2-AS   | lincRNA chr4     | 1.84E+08 | 1.84E+08 | - | 2183 | 8.441527 | 0.045346 | -0.45856 | 0.143931 | -3.186   | 0.00193  | 0.011705 | 1 |
| ENSG0000 response | Inflamed | KLHL34    | protein_cc chrX  | 21673609 | 21676448 | - | 2840 | 43.91885 | 0.038186 | 0.650852 | 0.204294 | 3.185866 | 0.001931 | 0.011705 | 1 |
| ENSG0000 response | Inflamed | ADCK5     | protein_cc chr8  | 1.46E+08 | 1.46E+08 | + | 2742 | 691.8473 | 0        | 0.273172 | 0.085746 | 3.185819 | 0.001931 | 0.011705 | 1 |
| ENSG0000 response | Inflamed | PTPRM     | protein_cc chr18 | 7566780  | 8406859  | + | 9906 | 1424.678 | 0        | -0.57078 | 0.179166 | -3.18578 | 0.001931 | 0.011705 | 1 |
| ENSG0000 response | Inflamed | RP11-407E | processed_chr3   | 1.94E+08 | 1.94E+08 | - | 7156 | 6.293556 | 0.090692 | 0.433381 | 0.136055 | 3.185334 | 0.001934 | 0.011718 | 1 |
| ENSG0000 response | Inflamed | MATN2     | protein_cc chr8  | 98881068 | 99048944 | + | 6938 | 3194.919 | 0        | 0.538833 | 0.169177 | 3.185033 | 0.001936 | 0.011726 | 1 |
| ENSG0000 response | Inflamed | CHMP4B    | protein_cc chr20 | 32399110 | 32442172 | + | 1646 | 7393.131 | 0        | 0.18946  | 0.059498 | 3.184298 | 0.00194  | 0.011751 | 1 |
| ENSG0000 response | Inflamed | NUDT16    | protein_cc chr3  | 1.31E+08 | 1.31E+08 | + | 7038 | 2994.01  | 0        | 0.282423 | 0.0887   | 3.184015 | 0.001942 | 0.011754 | 1 |
| ENSG0000 response | Inflamed | GSTM4     | protein_cc chr1  | 1.1E+08  | 1.1E+08  | + | 5370 | 1621.012 | 0        | 0.309596 | 0.097235 | 3.183998 | 0.001942 | 0.011754 | 1 |
| ENSG0000 response | Inflamed | O2-Mar    | protein_cc chr19 | 8478154  | 8503901  | + | 2216 | 1134.484 | 0        | -0.24509 | 0.076974 | -3.18399 | 0.001942 | 0.011754 | 1 |
| ENSG0000 response | Inflamed | TTC6      | protein_cc chr14 | 38065052 | 38510647 | + | 8418 | 26.46778 | 0.040573 | 0.647512 | 0.203422 | 3.183099 | 0.001948 | 0.011784 | 1 |
| ENSG0000 response | Inflamed | RP11-326C | lincRNA chr11    | 325703   | 326294   | - | 592  | 2.615752 | 0.505967 | -0.52712 | 0.165622 | -3.18265 | 0.00195  | 0.011798 | 1 |
| ENSG0000 response | Inflamed | RP11-573C | lincRNA chr3     | 1.87E+08 | 1.87E+08 | - | 1832 | 2.119332 | 0.508353 | -0.38504 | 0.120987 | -3.1825  | 0.001951 | 0.011801 | 1 |
| ENSG0000 response | Inflamed | MIR3185   | miRNA chr17      | 46801770 | 46801837 | - | 68   | 3.167064 | 0.575179 | 0.676294 | 0.212521 | 3.182247 | 0.001953 | 0.011807 | 1 |
| ENSG0000 response | Inflamed | TK2       | protein_cc chr16 | 66541906 | 66586447 | - | 7169 | 1033.243 | 0        | -0.25529 | 0.080229 | -3.18206 | 0.001954 | 0.011812 | 1 |
| ENSG0000 response | Inflamed | SUMF1     | protein_cc chr3  | 3742498  | 4508965  | - | 6952 | 1352.093 | 0        | 0.251783 | 0.079159 | 3.180731 | 0.001962 | 0.011858 | 1 |
| ENSG0000 response | Inflamed | RP11-255F | pseudoger chr19  | 23945746 | 24016116 | + | 2122 | 58.31742 | 0.02148  | 0.82271  | 0.258679 | 3.180422 | 0.001964 | 0.011867 | 1 |
| ENSG0000 response | Inflamed | RP11-655C | lincRNA chr11    | 58265361 | 58273231 | - | 1002 | 3.513126 | 0.360382 | -0.56842 | 0.178769 | -3.17962 | 0.001969 | 0.011894 | 1 |
| ENSG0000 response | Inflamed | ACP2      | protein_cc chr11 | 47260853 | 47270457 | - | 3484 | 2668.389 | 0        | -0.18518 | 0.058241 | -3.17951 | 0.00197  | 0.011895 | 1 |

|                   |          |           |                  |          |          |   |       |          |          |          |          |          |          |          |   |
|-------------------|----------|-----------|------------------|----------|----------|---|-------|----------|----------|----------|----------|----------|----------|----------|---|
| ENSG0000 response | Inflamed | AMPD3     | protein_cc chr11 | 10329860 | 10529126 | + | 6793  | 1145.169 | 0        | -0.39478 | 0.124172 | -3.17926 | 0.001971 | 0.011902 | 1 |
| ENSG0000 response | Inflamed | VIPR2     | protein_cc chr7  | 1.59E+08 | 1.59E+08 | - | 5222  | 140.3675 | 0.004773 | -0.82418 | 0.259433 | -3.17684 | 0.001986 | 0.011989 | 1 |
| ENSG0000 response | Inflamed | GRIK2     | protein_cc chr6  | 1.02E+08 | 1.03E+08 | + | 7492  | 16.2148  | 0.062053 | 0.647252 | 0.203823 | 3.175554 | 0.001994 | 0.012035 | 1 |
| ENSG0000 response | Inflamed | DAXX      | protein_cc chr6  | 33286335 | 33297046 | - | 3662  | 2551.902 | 0        | -0.18162 | 0.057202 | -3.17504 | 0.001997 | 0.012052 | 1 |
| ENSG0000 response | Inflamed | COL6A5    | protein_cc chr3  | 1.3E+08  | 1.3E+08  | + | 9591  | 100.8115 | 0.031026 | -0.97684 | 0.307673 | -3.17492 | 0.001998 | 0.012053 | 1 |
| ENSG0000 response | Inflamed | LANCL3    | protein_cc chrX  | 37430822 | 37543716 | + | 10298 | 137.3556 | 0        | 0.714967 | 0.225224 | 3.174468 | 0.002001 | 0.012068 | 1 |
| ENSG0000 response | Inflamed | RP11-442M | lincRNA chr1     | 28969740 | 28975093 | + | 978   | 5.589499 | 0.071599 | -0.41073 | 0.129401 | -3.17409 | 0.002003 | 0.012079 | 1 |
| ENSG0000 response | Inflamed | ARHGEF6   | protein_cc chrX  | 1.36E+08 | 1.36E+08 | - | 6564  | 1065.353 | 0        | -0.65113 | 0.205157 | -3.17381 | 0.002005 | 0.012087 | 1 |
| ENSG0000 response | Inflamed | ATP5G1    | protein_cc chr17 | 46970127 | 46973233 | + | 2615  | 2940.511 | 0        | 0.362714 | 0.114302 | 3.173303 | 0.002008 | 0.012103 | 1 |
| ENSG0000 response | Inflamed | AGAP1-IT1 | sense_intr chr2  | 2.36E+08 | 2.36E+08 | + | 664   | 20.14081 | 0.00716  | 0.497177 | 0.156689 | 3.173009 | 0.00201  | 0.012112 | 1 |
| ENSG0000 response | Inflamed | RP1-125I3 | antisense chr1   | 26186104 | 26189911 | + | 849   | 3.591885 | 0.236277 | -0.41107 | 0.129569 | -3.17262 | 0.002012 | 0.012124 | 1 |
| ENSG0000 response | Inflamed | DSG1      | protein_cc chr18 | 28898052 | 28936992 | + | 5252  | 1.081146 | 0.725537 | 0.3539   | 0.111567 | 3.172096 | 0.002016 | 0.012141 | 1 |
| ENSG0000 response | Inflamed | TRBC2     | TR_C_gene chr7   | 1.42E+08 | 1.43E+08 | + | 758   | 2177.375 | 0        | -0.55115 | 0.173762 | -3.17187 | 0.002017 | 0.012146 | 1 |
| ENSG0000 response | Inflamed | PDGFRL    | protein_cc chr8  | 17433942 | 17501580 | + | 2409  | 43.59189 | 0.004773 | -0.46372 | 0.146205 | -3.17169 | 0.002018 | 0.01215  | 1 |
| ENSG0000 response | Inflamed | SLC44A1   | protein_cc chr9  | 1.08E+08 | 1.08E+08 | + | 12613 | 7510.53  | 0        | 0.468001 | 0.147587 | 3.171014 | 0.002023 | 0.012172 | 1 |
| ENSG0000 response | Inflamed | PLEKHM2   | protein_cc chr1  | 16010827 | 16061264 | + | 4122  | 3787.234 | 0        | -0.29699 | 0.093657 | -3.17098 | 0.002023 | 0.012172 | 1 |
| ENSG0000 response | Inflamed | GPR75-AS1 | protein_cc chr2  | 53759810 | 54087170 | - | 6505  | 28.15036 | 0        | -0.41999 | 0.132484 | -3.17012 | 0.002028 | 0.012202 | 1 |
| ENSG0000 response | Inflamed | BPGM      | protein_cc chr7  | 1.34E+08 | 1.34E+08 | + | 2539  | 320.2697 | 0        | -0.39877 | 0.125804 | -3.16975 | 0.002031 | 0.012211 | 1 |
| ENSG0000 response | Inflamed | IGHV2OR1  | IG_V_gene chr16  | 32859034 | 32859477 | + | 358   | 1.303103 | 0.727924 | -0.43746 | 0.138013 | -3.16972 | 0.002031 | 0.012211 | 1 |
| ENSG0000 response | Inflamed | GSN-AS1   | antisense chr9   | 1.24E+08 | 1.24E+08 | - | 4763  | 2.961814 | 0.470167 | 0.530035 | 0.167222 | 3.169653 | 0.002031 | 0.012211 | 1 |
| ENSG0000 response | Inflamed | AC008074  | antisense chr2   | 64622354 | 64680932 | - | 723   | 6.047733 | 0.102625 | 0.472268 | 0.149005 | 3.169484 | 0.002032 | 0.012215 | 1 |
| ENSG0000 response | Inflamed | SYTL4     | protein_cc chrX  | 99929488 | 99987110 | - | 7518  | 891.0764 | 0        | 0.590902 | 0.186441 | 3.169374 | 0.002033 | 0.012216 | 1 |
| ENSG0000 response | Inflamed | MTCH2     | protein_cc chr11 | 47638867 | 47664175 | - | 2897  | 2820.482 | 0        | 0.272445 | 0.085967 | 3.169188 | 0.002034 | 0.01222  | 1 |
| ENSG0000 response | Inflamed | AMER3     | protein_cc chr2  | 1.32E+08 | 1.32E+08 | + | 6543  | 20.05251 | 0.076372 | 0.793882 | 0.250533 | 3.168771 | 0.002037 | 0.012228 | 1 |
| ENSG0000 response | Inflamed | RP11-8L8  | lincRNA chr14    | 1.02E+08 | 1.02E+08 | + | 943   | 4.529833 | 0.195704 | -0.47668 | 0.150435 | -3.16869 | 0.002037 | 0.012228 | 1 |
| ENSG0000 response | Inflamed | SARDH     | protein_cc chr9  | 1.37E+08 | 1.37E+08 | - | 5391  | 124.1814 | 0        | -0.52554 | 0.165854 | -3.16867 | 0.002037 | 0.012228 | 1 |
| ENSG0000 response | Inflamed | C3orf83   | protein_cc chr3  | 12556433 | 12602558 | - | 1829  | 89.59666 | 0.009547 | 0.554593 | 0.175025 | 3.168657 | 0.002037 | 0.012228 | 1 |
| ENSG0000 response | Inflamed | SNAPC1    | protein_cc chr14 | 62229075 | 62263146 | + | 2656  | 89.00716 | 0        | -0.55238 | 0.174327 | -3.16863 | 0.002038 | 0.012228 | 1 |
| ENSG0000 response | Inflamed | GPT       | protein_cc chr8  | 1.46E+08 | 1.46E+08 | + | 2756  | 3676.279 | 0        | 0.724443 | 0.228635 | 3.168561 | 0.002038 | 0.012228 | 1 |
| ENSG0000 response | Inflamed | SIAH2-AS1 | antisense chr3   | 1.5E+08  | 1.5E+08  | + | 441   | 2.410501 | 0.408115 | 0.36482  | 0.115151 | 3.168195 | 0.00204  | 0.012239 | 1 |
| ENSG0000 response | Inflamed | RP11-345M | lincRNA chr16    | 79710005 | 79841819 | + | 2409  | 5.353222 | 0.307876 | -0.59791 | 0.188742 | -3.16789 | 0.002042 | 0.012247 | 1 |
| ENSG0000 response | Inflamed | RP1-249H  | lincRNA chr6     | 1.14E+08 | 1.14E+08 | - | 2755  | 88.66587 | 0.009547 | 0.859094 | 0.271193 | 3.167836 | 0.002043 | 0.012247 | 1 |
| ENSG0000 response | Inflamed | VWA5B2    | protein_cc chr3  | 1.84E+08 | 1.84E+08 | + | 5730  | 98.50119 | 0.004773 | 0.758067 | 0.239328 | 3.167484 | 0.002045 | 0.012258 | 1 |
| ENSG0000 response | Inflamed | RPL13P5   | pseudogen chr12  | 6982553  | 6993905  | + | 1783  | 61.6253  | 0.00716  | -0.31872 | 0.10065  | -3.16662 | 0.00205  | 0.012288 | 1 |
| ENSG0000 response | Inflamed | RP11-38P2 | lincRNA chr3     | 1.53E+08 | 1.53E+08 | + | 2050  | 202.9427 | 0.004773 | 0.878269 | 0.277383 | 3.166264 | 0.002053 | 0.012299 | 1 |
| ENSG0000 response | Inflamed | MANEA     | protein_cc chr6  | 96025419 | 96057333 | + | 5187  | 400.2243 | 0        | -0.61995 | 0.195819 | -3.16595 | 0.002055 | 0.012308 | 1 |
| ENSG0000 response | Inflamed | CTC-497E2 | lincRNA chr11    | 13022637 | 13030706 | - | 670   | 1.630072 | 0.622912 | 0.44497  | 0.140571 | 3.165459 | 0.002058 | 0.012324 | 1 |
| ENSG0000 response | Inflamed | RP11-104J | antisense chr17  | 34328458 | 34338658 | + | 1920  | 7.961814 | 0.181384 | 0.604513 | 0.190992 | 3.165125 | 0.00206  | 0.012334 | 1 |
| ENSG0000 response | Inflamed | POLR3H    | protein_cc chr22 | 41921808 | 41940610 | - | 6577  | 1130.926 | 0        | -0.28877 | 0.091239 | -3.16502 | 0.002061 | 0.012335 | 1 |
| ENSG0000 response | Inflamed | RP11-3K1f | sense_intr chr3  | 1.69E+08 | 1.69E+08 | - | 513   | 0.842482 | 0.799523 | 0.307369 | 0.097125 | 3.164677 | 0.002063 | 0.012342 | 1 |

|                   |          |           |                  |          |          |   |      |          |          |          |          |          |          |          |   |
|-------------------|----------|-----------|------------------|----------|----------|---|------|----------|----------|----------|----------|----------|----------|----------|---|
| ENSG0000 response | Inflamed | ADAM23    | protein_cc chr2  | 2.07E+08 | 2.07E+08 | + | 6418 | 150.4654 | 0.00716  | -0.58363 | 0.184421 | -3.16465 | 0.002063 | 0.012342 | 1 |
| ENSG0000 response | Inflamed | ACVR1B    | protein_cc chr12 | 52345451 | 52390862 | + | 5690 | 4136.57  | 0        | 0.482412 | 0.152439 | 3.164616 | 0.002063 | 0.012342 | 1 |
| ENSG0000 response | Inflamed | RP11-686I | lincRNA chr17    | 33730856 | 33731392 | - | 537  | 14.26969 | 0.026253 | -0.51352 | 0.162288 | -3.16426 | 0.002066 | 0.012353 | 1 |
| ENSG0000 response | Inflamed | IGF2-AS   | antisense chr11  | 2161731  | 2169894  | + | 2867 | 2        | 0.601432 | -0.50872 | 0.160783 | -3.16401 | 0.002067 | 0.01236  | 1 |
| ENSG0000 response | Inflamed | SYTL1     | protein_cc chr1  | 27668513 | 27680421 | + | 5575 | 1727.086 | 0        | -0.44924 | 0.141992 | -3.16382 | 0.002068 | 0.012365 | 1 |
| ENSG0000 response | Inflamed | HNF1A     | protein_cc chr12 | 1.21E+08 | 1.21E+08 | + | 5028 | 993.7494 | 0.004773 | 0.674595 | 0.213241 | 3.163529 | 0.00207  | 0.012372 | 1 |
| ENSG0000 response | Inflamed | PKN3      | protein_cc chr9  | 1.31E+08 | 1.31E+08 | + | 3375 | 454.7518 | 0        | -0.4073  | 0.128751 | -3.16347 | 0.002071 | 0.012372 | 1 |
| ENSG0000 response | Inflamed | C15orf27  | protein_cc chr15 | 76352178 | 76521462 | + | 5265 | 28.59189 | 0.01432  | -0.64673 | 0.204443 | -3.16336 | 0.002071 | 0.012374 | 1 |
| ENSG0000 response | Inflamed | EC1       | protein_cc chr16 | 2289396  | 2302301  | - | 3234 | 1626.243 | 0        | 0.264853 | 0.083733 | 3.163057 | 0.002073 | 0.012382 | 1 |
| ENSG0000 response | Inflamed | GH1       | protein_cc chr17 | 61994560 | 61996179 | - | 1177 | 2.97136  | 0.355609 | -0.46465 | 0.146902 | -3.163   | 0.002074 | 0.012382 | 1 |
| ENSG0000 response | Inflamed | ANO9      | protein_cc chr11 | 417933   | 442011   | - | 6207 | 3961.702 | 0        | 0.49279  | 0.155809 | 3.162783 | 0.002075 | 0.012388 | 1 |
| ENSG0000 response | Inflamed | CLDN5     | protein_cc chr22 | 19510547 | 19515068 | - | 3429 | 729.9379 | 0        | -0.60933 | 0.19267  | -3.16254 | 0.002077 | 0.012394 | 1 |
| ENSG0000 response | Inflamed | AC093391  | antisense chr2   | 1.37E+08 | 1.37E+08 | + | 5503 | 29.76611 | 0        | -0.43707 | 0.13824  | -3.16167 | 0.002082 | 0.012425 | 1 |
| ENSG0000 response | Inflamed | CFL2      | protein_cc chr14 | 35179593 | 35184029 | - | 3561 | 417.9356 | 0        | -0.49923 | 0.157913 | -3.16142 | 0.002084 | 0.012432 | 1 |
| ENSG0000 response | Inflamed | FGF2      | protein_cc chr4  | 1.24E+08 | 1.24E+08 | + | 6775 | 258.9976 | 0.002387 | -0.90659 | 0.286796 | -3.16111 | 0.002086 | 0.012441 | 1 |
| ENSG0000 response | Inflamed | RP11-321C | lincRNA chr15    | 63682335 | 63729347 | + | 1058 | 62.36277 | 0.052506 | 0.928024 | 0.293594 | 3.160907 | 0.002087 | 0.012446 | 1 |
| ENSG0000 response | Inflamed | SFTPB     | protein_cc chr2  | 85884437 | 85895864 | - | 4110 | 1.684964 | 0.782816 | -0.53812 | 0.170258 | -3.16062 | 0.002089 | 0.012454 | 1 |
| ENSG0000 response | Inflamed | PTK6      | protein_cc chr20 | 62159778 | 62168723 | - | 2523 | 3974.752 | 0        | 0.561519 | 0.177674 | 3.160388 | 0.002091 | 0.012461 | 1 |
| ENSG0000 response | Inflamed | CCL15     | protein_cc chr17 | 34323476 | 34329084 | - | 1567 | 238.4845 | 0.002387 | 0.597194 | 0.188969 | 3.160281 | 0.002091 | 0.012462 | 1 |
| ENSG0000 response | Inflamed | TSPAN5    | protein_cc chr4  | 99391518 | 99579780 | - | 7430 | 350.8377 | 0        | -0.47439 | 0.150115 | -3.16018 | 0.002092 | 0.012463 | 1 |
| ENSG0000 response | Inflamed | CYP2B7P1  | pseudoger chr19  | 41430124 | 41456565 | + | 4064 | 123.3914 | 0.011933 | 0.903719 | 0.285995 | 3.159909 | 0.002094 | 0.012471 | 1 |
| ENSG0000 response | Inflamed | HOXC9     | protein_cc chr12 | 54388679 | 54397121 | + | 1679 | 5.914081 | 0.374702 | -0.60622 | 0.191867 | -3.15956 | 0.002096 | 0.012481 | 1 |
| ENSG0000 response | Inflamed | RPS6KA6   | protein_cc chrX  | 83318984 | 83442933 | - | 2890 | 110.0286 | 0.011933 | 0.83607  | 0.264653 | 3.159121 | 0.002099 | 0.012496 | 1 |
| ENSG0000 response | Inflamed | RP11-342I | antisense chr10  | 33500205 | 33502732 | + | 781  | 2.315036 | 0.484487 | -0.46095 | 0.146011 | -3.15692 | 0.002113 | 0.012579 | 1 |
| ENSG0000 response | Inflamed | NDUFB9    | protein_cc chr8  | 1.26E+08 | 1.26E+08 | + | 2629 | 2843.749 | 0        | 0.368614 | 0.116809 | 3.155692 | 0.002121 | 0.012624 | 1 |
| ENSG0000 response | Inflamed | KIAA1683  | protein_cc chr19 | 18367908 | 18385319 | - | 9153 | 357.4773 | 0        | 0.629014 | 0.199362 | 3.155135 | 0.002125 | 0.012643 | 1 |
| ENSG0000 response | Inflamed | ARHGEF9   | protein_cc chrX  | 62854847 | 63005426 | - | 6673 | 1037.296 | 0        | 0.414592 | 0.13141  | 3.154949 | 0.002126 | 0.012648 | 1 |
| ENSG0000 response | Inflamed | GABRD     | protein_cc chr1  | 1950780  | 1962192  | + | 1913 | 20.31742 | 0.019093 | -0.50231 | 0.159235 | -3.15449 | 0.002129 | 0.012662 | 1 |
| ENSG0000 response | Inflamed | CA11      | protein_cc chr19 | 49141199 | 49149569 | - | 2075 | 156.1265 | 0        | -0.43249 | 0.137106 | -3.15445 | 0.00213  | 0.012662 | 1 |
| ENSG0000 response | Inflamed | RP11-480I | lincRNA chr1     | 1.6E+08  | 1.6E+08  | + | 1266 | 605.3723 | 0.004773 | 0.801676 | 0.254149 | 3.154353 | 0.00213  | 0.012662 | 1 |
| ENSG0000 response | Inflamed | AC019171  | protein_cc chr2  | 39186764 | 39187483 | - | 720  | 4.663484 | 0.186158 | -0.43508 | 0.137943 | -3.15406 | 0.002132 | 0.012671 | 1 |
| ENSG0000 response | Inflamed | NAT6      | protein_cc chr3  | 50333833 | 50336852 | - | 2188 | 219.9905 | 0        | -0.28505 | 0.090379 | -3.154   | 0.002133 | 0.012671 | 1 |
| ENSG0000 response | Inflamed | TCP10L2   | protein_cc chr6  | 1.68E+08 | 1.68E+08 | + | 4332 | 2.718377 | 0.455847 | 0.497045 | 0.157605 | 3.153738 | 0.002134 | 0.012678 | 1 |
| ENSG0000 response | Inflamed | TMEM86A   | protein_cc chr11 | 18714669 | 18726332 | + | 4243 | 347.7566 | 0        | -0.35925 | 0.113918 | -3.15362 | 0.002135 | 0.01268  | 1 |
| ENSG0000 response | Inflamed | LPIN3     | protein_cc chr20 | 39969560 | 39989222 | + | 4565 | 2221.599 | 0        | 0.508963 | 0.16142  | 3.153031 | 0.002139 | 0.0127   | 1 |
| ENSG0000 response | Inflamed | RP11-496I | lincRNA chr4     | 24661479 | 24673191 | + | 2195 | 10.51313 | 0.157518 | 0.739852 | 0.234666 | 3.152793 | 0.002141 | 0.012705 | 1 |
| ENSG0000 response | Inflamed | EFHD1     | protein_cc chr2  | 2.33E+08 | 2.34E+08 | + | 3052 | 110.9523 | 0.002387 | -0.59031 | 0.187238 | -3.1527  | 0.002141 | 0.012705 | 1 |
| ENSG0000 response | Inflamed | RP1-80N2  | lincRNA chr6     | 6680542  | 6683866  | - | 3325 | 59.87351 | 0.026253 | 0.791545 | 0.25107  | 3.15269  | 0.002141 | 0.012705 | 1 |
| ENSG0000 response | Inflamed | DENND6B   | protein_cc chr22 | 50747459 | 50765489 | - | 5935 | 477.4535 | 0        | -0.29025 | 0.092073 | -3.15238 | 0.002143 | 0.012714 | 1 |
| ENSG0000 response | Inflamed | ACSM3     | protein_cc chr16 | 20621565 | 20808903 | + | 5095 | 610.1599 | 0        | 0.672091 | 0.213245 | 3.15174  | 0.002148 | 0.012737 | 1 |



|                   |          |           |                  |          |            |       |          |          |          |          |          |          |          |   |
|-------------------|----------|-----------|------------------|----------|------------|-------|----------|----------|----------|----------|----------|----------|----------|---|
| ENSG0000 response | Inflamed | GPR37L1   | protein_cc chr1  | 2.02E+08 | 2.02E+08 + | 6588  | 225.8974 | 0.004773 | 0.841451 | 0.267039 | 3.151038 | 0.002152 | 0.012762 | 1 |
| ENSG0000 response | Inflamed | CLDN2     | protein_cc chrX  | 1.06E+08 | 1.06E+08 + | 3410  | 1141.337 | 0.00716  | -1.14541 | 0.363511 | -3.15096 | 0.002153 | 0.012762 | 1 |
| ENSG0000 response | Inflamed | CTD-2201c | antisense chr5   | 1.13E+08 | 1.13E+08 + | 4194  | 2.443914 | 0.420048 | -0.45895 | 0.145676 | -3.15047 | 0.002156 | 0.012779 | 1 |
| ENSG0000 response | Inflamed | AP000476  | lincRNA chr21    | 25801054 | 25920256 + | 4970  | 3.188544 | 0.410501 | -0.54729 | 0.17373  | -3.15025 | 0.002158 | 0.012783 | 1 |
| ENSG0000 response | Inflamed | ENHO      | protein_cc chr9  | 34521038 | 34523039 - | 1082  | 170.926  | 0.002387 | 0.879566 | 0.279208 | 3.150215 | 0.002158 | 0.012783 | 1 |
| ENSG0000 response | Inflamed | LHFPL4    | protein_cc chr3  | 9543481  | 9595486 -  | 1893  | 6.362768 | 0.338902 | 0.734951 | 0.233307 | 3.150151 | 0.002158 | 0.012783 | 1 |
| ENSG0000 response | Inflamed | PEAR1     | protein_cc chr1  | 1.57E+08 | 1.57E+08 + | 5530  | 558.926  | 0        | -0.48194 | 0.152996 | -3.15003 | 0.002159 | 0.012785 | 1 |
| ENSG0000 response | Inflamed | CPXM2     | protein_cc chr10 | 1.25E+08 | 1.26E+08 - | 4689  | 452.6539 | 0.00716  | -0.70349 | 0.223335 | -3.14992 | 0.00216  | 0.012786 | 1 |
| ENSG0000 response | Inflamed | RP11-473M | lincRNA chr16    | 3126912  | 3137101 -  | 1326  | 75.58234 | 0.002387 | -0.61618 | 0.195643 | -3.14951 | 0.002163 | 0.012797 | 1 |
| ENSG0000 response | Inflamed | GLIS1     | protein_cc chr1  | 53971910 | 54199877 - | 2812  | 70.06683 | 0.023866 | -0.71822 | 0.228042 | -3.1495  | 0.002163 | 0.012797 | 1 |
| ENSG0000 response | Inflamed | LRP5      | protein_cc chr11 | 68080077 | 68216743 + | 6164  | 6448.494 | 0        | 0.442088 | 0.140407 | 3.148611 | 0.002169 | 0.012828 | 1 |
| ENSG0000 response | Inflamed | CCT8P1    | pseudoger chr1   | 1.47E+08 | 1.47E+08 - | 1657  | 63.72315 | 0.009547 | 0.664879 | 0.211168 | 3.148581 | 0.002169 | 0.012828 | 1 |
| ENSG0000 response | Inflamed | ATP5C1    | protein_cc chr10 | 7830092  | 7849778 +  | 2347  | 4242.093 | 0        | 0.343395 | 0.109076 | 3.148207 | 0.002171 | 0.01284  | 1 |
| ENSG0000 response | Inflamed | IDH3B     | protein_cc chr20 | 2639041  | 2644865 -  | 2299  | 2193.15  | 0        | 0.2094   | 0.066519 | 3.147975 | 0.002173 | 0.012846 | 1 |
| ENSG0000 response | Inflamed | KLHDC9    | protein_cc chr1  | 1.61E+08 | 1.61E+08 + | 1720  | 114.4726 | 0        | 0.390323 | 0.124008 | 3.147559 | 0.002176 | 0.012858 | 1 |
| ENSG0000 response | Inflamed | RP11-101E | lincRNA chr17    | 49512788 | 49523163 + | 3115  | 1.928401 | 0.570406 | -0.47662 | 0.151427 | -3.14753 | 0.002176 | 0.012858 | 1 |
| ENSG0000 response | Inflamed | GLIS2     | protein_cc chr16 | 4364762  | 4389598 +  | 4469  | 585.7494 | 0        | -0.61006 | 0.193833 | -3.14733 | 0.002177 | 0.012863 | 1 |
| ENSG0000 response | Inflamed | CTC-340I2 | antisense chr5   | 1.56E+08 | 1.56E+08 - | 460   | 1.124105 | 0.75179  | -0.42696 | 0.135667 | -3.14716 | 0.002178 | 0.012867 | 1 |
| ENSG0000 response | Inflamed | CPT2      | protein_cc chr1  | 53662101 | 53679869 + | 3401  | 2631.277 | 0        | 0.401168 | 0.127472 | 3.147106 | 0.002179 | 0.012867 | 1 |
| ENSG0000 response | Inflamed | SH2D1A    | protein_cc chrX  | 1.23E+08 | 1.24E+08 + | 2450  | 111.611  | 0        | -0.69059 | 0.219459 | -3.14677 | 0.002181 | 0.012877 | 1 |
| ENSG0000 response | Inflamed | RP11-96K1 | antisense chr1   | 1.11E+08 | 1.11E+08 + | 2359  | 2.286396 | 0.536993 | -0.48173 | 0.153104 | -3.14643 | 0.002183 | 0.012888 | 1 |
| ENSG0000 response | Inflamed | CTA-384D  | antisense chr22  | 50984844 | 50986081 + | 157   | 1.892601 | 0.606205 | -0.51008 | 0.16212  | -3.14635 | 0.002184 | 0.012888 | 1 |
| ENSG0000 response | Inflamed | PTP4A1    | protein_cc chr6  | 64231666 | 64293492 + | 5796  | 9322.926 | 0        | 0.516283 | 0.164098 | 3.146179 | 0.002185 | 0.012892 | 1 |
| ENSG0000 response | Inflamed | TRIM61    | protein_cc chr4  | 1.66E+08 | 1.66E+08 - | 1582  | 5.75895  | 0.128878 | -0.4821  | 0.153238 | -3.14611 | 0.002186 | 0.012892 | 1 |
| ENSG0000 response | Inflamed | TMEM190   | protein_cc chr19 | 55888204 | 55889612 + | 593   | 3.53222  | 0.460621 | -0.54286 | 0.172561 | -3.14592 | 0.002187 | 0.012897 | 1 |
| ENSG0000 response | Inflamed | FAM83G    | protein_cc chr17 | 18872102 | 18908117 - | 7883  | 3151.107 | 0        | 0.38049  | 0.12097  | 3.14533  | 0.002191 | 0.012917 | 1 |
| ENSG0000 response | Inflamed | LPHN2     | protein_cc chr1  | 81771845 | 82458120 + | 7754  | 1232.683 | 0        | -0.79585 | 0.253048 | -3.14504 | 0.002193 | 0.012926 | 1 |
| ENSG0000 response | Inflamed | AAMDC     | protein_cc chr11 | 77532155 | 77629478 + | 1943  | 226.4726 | 0        | 0.271354 | 0.086292 | 3.144613 | 0.002196 | 0.01294  | 1 |
| ENSG0000 response | Inflamed | LSAMP     | protein_cc chr3  | 1.16E+08 | 1.18E+08 - | 10367 | 414.5131 | 0.002387 | -0.77507 | 0.246506 | -3.14424 | 0.002198 | 0.012948 | 1 |
| ENSG0000 response | Inflamed | C15orf48  | protein_cc chr15 | 45722727 | 45740959 + | 1405  | 8931.826 | 0        | 0.492465 | 0.156625 | 3.144229 | 0.002198 | 0.012948 | 1 |
| ENSG0000 response | Inflamed | PLCB1     | protein_cc chr20 | 8112824  | 8949003 +  | 10942 | 168.9666 | 0.002387 | -0.5937  | 0.188822 | -3.14421 | 0.002199 | 0.012948 | 1 |
| ENSG0000 response | Inflamed | CCDC36    | protein_cc chr3  | 49235861 | 49295537 + | 4356  | 16.49165 | 0.050119 | -0.60335 | 0.191929 | -3.14363 | 0.002202 | 0.012965 | 1 |
| ENSG0000 response | Inflamed | PBX2      | protein_cc chr6  | 32152512 | 32157963 - | 4350  | 2946.609 | 0        | -0.33852 | 0.107686 | -3.14359 | 0.002203 | 0.012965 | 1 |
| ENSG0000 response | Inflamed | HNF4G     | protein_cc chr8  | 76320149 | 76479078 + | 4806  | 1458.998 | 0.002387 | 0.850239 | 0.270476 | 3.14349  | 0.002203 | 0.012965 | 1 |
| ENSG0000 response | Inflamed | O2-Mar    | protein_cc chr1  | 2.21E+08 | 2.21E+08 + | 2590  | 611.031  | 0        | 0.313815 | 0.09983  | 3.143486 | 0.002203 | 0.012965 | 1 |
| ENSG0000 response | Inflamed | THAP11    | protein_cc chr16 | 67876213 | 67878097 + | 1885  | 1063.582 | 0        | -0.18361 | 0.058412 | -3.14341 | 0.002204 | 0.012966 | 1 |
| ENSG0000 response | Inflamed | PROB1     | protein_cc chr5  | 1.39E+08 | 1.39E+08 - | 3251  | 86.71599 | 0.01432  | -0.62147 | 0.19774  | -3.14284 | 0.002208 | 0.012984 | 1 |
| ENSG0000 response | Inflamed | CNTNAP4   | protein_cc chr16 | 76311176 | 76593135 + | 5367  | 2.231504 | 0.692124 | -0.64562 | 0.205429 | -3.1428  | 0.002208 | 0.012984 | 1 |
| ENSG0000 response | Inflamed | SCRN1     | protein_cc chr7  | 29959719 | 30029905 - | 6046  | 1300.864 | 0        | -0.5215  | 0.166045 | -3.14069 | 0.002223 | 0.013067 | 1 |
| ENSG0000 response | Inflamed | RP11-428k | antisense chr1   | 1.79E+08 | 1.79E+08 - | 1980  | 30.62053 | 0.011933 | -0.54245 | 0.172738 | -3.14031 | 0.002225 | 0.013079 | 1 |

|                   |          |           |                  |          |          |   |       |          |          |          |          |          |          |          |   |
|-------------------|----------|-----------|------------------|----------|----------|---|-------|----------|----------|----------|----------|----------|----------|----------|---|
| ENSG0000 response | Inflamed | ESRP1     | protein_cc chr8  | 95653302 | 95719694 | + | 4875  | 5488.451 | 0        | 0.736966 | 0.234696 | 3.140085 | 0.002227 | 0.013085 | 1 |
| ENSG0000 response | Inflamed | RP11-380F | antisense chr4   | 23562546 | 23770275 | + | 703   | 9.334129 | 0.362768 | 0.80079  | 0.255038 | 3.139879 | 0.002228 | 0.01309  | 1 |
| ENSG0000 response | Inflamed | SPRR1B    | protein_cc chr1  | 1.53E+08 | 1.53E+08 | + | 620   | 61.05967 | 0.52506  | -1.54235 | 0.491227 | -3.1398  | 0.002229 | 0.01309  | 1 |
| ENSG0000 response | Inflamed | CTD-2132I | sense_intr chr17 | 40192731 | 40195135 | - | 761   | 23.76611 | 0.038186 | 0.626223 | 0.19945  | 3.139753 | 0.002229 | 0.01309  | 1 |
| ENSG0000 response | Inflamed | CCDC85C   | protein_cc chr14 | 99977603 | 1E+08    | - | 6363  | 4048.807 | 0        | 0.35987  | 0.114624 | 3.139563 | 0.00223  | 0.013095 | 1 |
| ENSG0000 response | Inflamed | CD3E      | protein_cc chr11 | 1.18E+08 | 1.18E+08 | + | 2844  | 1354.508 | 0        | -0.49748 | 0.158464 | -3.13941 | 0.002231 | 0.013098 | 1 |
| ENSG0000 response | Inflamed | SPIB      | protein_cc chr19 | 50922195 | 50934570 | + | 4281  | 1536.511 | 0        | 0.769941 | 0.245272 | 3.139135 | 0.002233 | 0.013106 | 1 |
| ENSG0000 response | Inflamed | WWTR1-A   | antisense chr3   | 1.49E+08 | 1.49E+08 | + | 2603  | 3.792363 | 0.267303 | -0.46475 | 0.148062 | -3.13885 | 0.002235 | 0.013115 | 1 |
| ENSG0000 response | Inflamed | CREB3L1   | protein_cc chr11 | 46299212 | 46342972 | + | 4038  | 7974.728 | 0        | 0.43028  | 0.137092 | 3.138615 | 0.002237 | 0.013121 | 1 |
| ENSG0000 response | Inflamed | SLC5A8    | protein_cc chr12 | 1.02E+08 | 1.02E+08 | - | 4178  | 25.45107 | 0.143198 | 0.966869 | 0.308063 | 3.138547 | 0.002237 | 0.013121 | 1 |
| ENSG0000 response | Inflamed | MUC16     | protein_cc chr19 | 8959520  | 9092018  | - | 43830 | 47.15513 | 0.169451 | -1.05425 | 0.335951 | -3.13811 | 0.00224  | 0.013136 | 1 |
| ENSG0000 response | Inflamed | SLC26A3   | protein_cc chr7  | 1.07E+08 | 1.07E+08 | - | 3382  | 43314.43 | 0        | 1.476464 | 0.470584 | 3.137518 | 0.002245 | 0.013157 | 1 |
| ENSG0000 response | Inflamed | RP11-757F | antisense chr3   | 1.12E+08 | 1.12E+08 | + | 1937  | 106.1122 | 0.016706 | 0.969873 | 0.309152 | 3.137198 | 0.002247 | 0.013168 | 1 |
| ENSG0000 response | Inflamed | PIP4K2C   | protein_cc chr12 | 57984957 | 57997198 | + | 3296  | 3074.621 | 0        | 0.296386 | 0.094479 | 3.137047 | 0.002248 | 0.01317  | 1 |
| ENSG0000 response | Inflamed | AL163953. | lincRNA chr14    | 54066550 | 54080744 | - | 726   | 4.310263 | 0.367542 | 0.606596 | 0.193368 | 3.136997 | 0.002248 | 0.01317  | 1 |
| ENSG0000 response | Inflamed | SPRED2    | protein_cc chr2  | 65537985 | 65659771 | - | 5154  | 2548.415 | 0        | 0.446341 | 0.142294 | 3.13676  | 0.00225  | 0.013177 | 1 |
| ENSG0000 response | Inflamed | RP5-1061I | lincRNA chr1     | 2.29E+08 | 2.29E+08 | - | 1155  | 14.47494 | 0.042959 | 0.512006 | 0.163268 | 3.135981 | 0.002255 | 0.013206 | 1 |
| ENSG0000 response | Inflamed | KLHL29    | protein_cc chr2  | 23608088 | 23931481 | + | 11071 | 542.6802 | 0        | -0.5926  | 0.188975 | -3.13585 | 0.002256 | 0.013207 | 1 |
| ENSG0000 response | Inflamed | KIF17     | protein_cc chr1  | 20990507 | 21044510 | - | 4470  | 45.54654 | 0        | -0.47358 | 0.151025 | -3.1358  | 0.002257 | 0.013207 | 1 |
| ENSG0000 response | Inflamed | HLA-DRB5  | protein_cc chr6  | 32485120 | 32498064 | - | 1260  | 3516.229 | 0.002387 | -0.5517  | 0.17596  | -3.1354  | 0.002259 | 0.01322  | 1 |
| ENSG0000 response | Inflamed | LRPAP1    | protein_cc chr4  | 3508103  | 3534286  | - | 8724  | 4517.425 | 0        | -0.19749 | 0.062991 | -3.13515 | 0.002261 | 0.013228 | 1 |
| ENSG0000 response | Inflamed | GABARAPL  | protein_cc chr12 | 10365057 | 10375727 | + | 4084  | 1263.718 | 0        | -0.2863  | 0.091332 | -3.13477 | 0.002264 | 0.01324  | 1 |
| ENSG0000 response | Inflamed | USHBP1    | protein_cc chr19 | 17359985 | 17393595 | - | 5175  | 115.6683 | 0.00716  | -0.55588 | 0.177341 | -3.13451 | 0.002266 | 0.013248 | 1 |
| ENSG0000 response | Inflamed | RP11-394I | lincRNA chr2     | 1.75E+08 | 1.75E+08 | + | 1884  | 3.706444 | 0.267303 | -0.50204 | 0.160194 | -3.13392 | 0.00227  | 0.013267 | 1 |
| ENSG0000 response | Inflamed | ST3GAL5   | protein_cc chr2  | 86066267 | 86116137 | - | 5701  | 456.253  | 0        | -0.571   | 0.182201 | -3.1339  | 0.00227  | 0.013267 | 1 |
| ENSG0000 response | Inflamed | RP11-801F | antisense chr2   | 2.09E+08 | 2.09E+08 | - | 564   | 64.93079 | 0.009547 | 0.762258 | 0.243263 | 3.133474 | 0.002273 | 0.013281 | 1 |
| ENSG0000 response | Inflamed | SLC22A16  | protein_cc chr6  | 1.11E+08 | 1.11E+08 | - | 3791  | 2.190931 | 0.587112 | -0.45682 | 0.145791 | -3.13342 | 0.002273 | 0.013281 | 1 |
| ENSG0000 response | Inflamed | PPM1L     | protein_cc chr3  | 1.6E+08  | 1.61E+08 | + | 12447 | 567.8401 | 0        | 0.49398  | 0.157664 | 3.133118 | 0.002275 | 0.013291 | 1 |
| ENSG0000 response | Inflamed | SAP30     | protein_cc chr4  | 1.74E+08 | 1.74E+08 | + | 1320  | 224.3675 | 0        | -0.29687 | 0.094757 | -3.13295 | 0.002277 | 0.013295 | 1 |
| ENSG0000 response | Inflamed | KCNC3     | protein_cc chr19 | 50815194 | 50836772 | - | 6277  | 158.7804 | 0.01432  | -0.62597 | 0.199823 | -3.13262 | 0.002279 | 0.013305 | 1 |
| ENSG0000 response | Inflamed | DOLK      | protein_cc chr9  | 1.32E+08 | 1.32E+08 | - | 2090  | 606.1814 | 0        | -0.22491 | 0.0718   | -3.13239 | 0.002281 | 0.013312 | 1 |
| ENSG0000 response | Inflamed | FRMD4A    | protein_cc chr10 | 13685706 | 14504141 | - | 12499 | 915.5847 | 0        | -0.43266 | 0.138137 | -3.13212 | 0.002282 | 0.01332  | 1 |
| ENSG0000 response | Inflamed | SEPP1     | protein_cc chr5  | 42799982 | 42887494 | - | 5688  | 21321.06 | 0        | 0.567119 | 0.181088 | 3.131737 | 0.002285 | 0.013326 | 1 |
| ENSG0000 response | Inflamed | TMEM52    | protein_cc chr1  | 1849029  | 1850712  | - | 1594  | 96.09308 | 0        | 0.438422 | 0.139994 | 3.131726 | 0.002285 | 0.013326 | 1 |
| ENSG0000 response | Inflamed | RP11-677I | antisense chr11  | 1.25E+08 | 1.25E+08 | - | 445   | 4.816229 | 0.205251 | 0.513482 | 0.163962 | 3.131705 | 0.002285 | 0.013326 | 1 |
| ENSG0000 response | Inflamed | KIAA1211  | protein_cc chr4  | 57036361 | 57194791 | + | 5939  | 1914.99  | 0        | 0.557486 | 0.178015 | 3.131684 | 0.002286 | 0.013326 | 1 |
| ENSG0000 response | Inflamed | ADCYAP1   | protein_cc chr18 | 904944   | 912173   | + | 3805  | 126.8735 | 0.042959 | -0.8556  | 0.273235 | -3.13138 | 0.002288 | 0.013336 | 1 |
| ENSG0000 response | Inflamed | UGP2      | protein_cc chr2  | 64068074 | 64118696 | + | 6477  | 6403.095 | 0        | 0.522706 | 0.166938 | 3.131141 | 0.002289 | 0.013343 | 1 |
| ENSG0000 response | Inflamed | PTCRA     | protein_cc chr6  | 42883727 | 42893573 | + | 1123  | 9.346062 | 0.047733 | -0.56787 | 0.181373 | -3.13093 | 0.002291 | 0.013345 | 1 |
| ENSG0000 response | Inflamed | MST1P2    | pseudoger chr1   | 16972069 | 16976914 | + | 2686  | 153.401  | 0.00716  | 0.829996 | 0.265096 | 3.13093  | 0.002291 | 0.013345 | 1 |

|                   |          |           |            |       |          |          |   |       |          |          |          |          |          |          |          |   |
|-------------------|----------|-----------|------------|-------|----------|----------|---|-------|----------|----------|----------|----------|----------|----------|----------|---|
| ENSG0000 response | Inflamed | NCBP2-AS1 | lincRNA    | chr3  | 1.97E+08 | 1.97E+08 | + | 918   | 520.2864 | 0        | 0.245194 | 0.078323 | 3.130529 | 0.002294 | 0.013359 | 1 |
| ENSG0000 response | Inflamed | RP11-510M | sense_intr | chr1  | 2.02E+08 | 2.02E+08 | + | 987   | 56.3222  | 0.02864  | 0.744575 | 0.237855 | 3.130378 | 0.002295 | 0.013362 | 1 |
| ENSG0000 response | Inflamed | DCN       | protein_cc | chr12 | 91539025 | 91576900 | - | 8083  | 7662.248 | 0        | -0.75707 | 0.24185  | -3.13032 | 0.002295 | 0.013362 | 1 |
| ENSG0000 response | Inflamed | CAMK1D    | protein_cc | chr10 | 12391481 | 12877545 | + | 8746  | 2599.831 | 0        | 0.44834  | 0.143237 | 3.130061 | 0.002297 | 0.013369 | 1 |
| ENSG0000 response | Inflamed | ADAMTS1   | protein_cc | chr19 | 8645126  | 8675620  | - | 5739  | 514.9785 | 0        | -0.67406 | 0.215355 | -3.13    | 0.002297 | 0.013369 | 1 |
| ENSG0000 response | Inflamed | SLC10A1   | protein_cc | chr14 | 70242134 | 70264006 | - | 2049  | 2.863962 | 0.486874 | 0.389584 | 0.124475 | 3.129832 | 0.002299 | 0.013373 | 1 |
| ENSG0000 response | Inflamed | CXCL2     | protein_cc | chr4  | 74962752 | 74965010 | - | 1500  | 829.9189 | 0.002387 | -1.0038  | 0.320752 | -3.12951 | 0.002301 | 0.013383 | 1 |
| ENSG0000 response | Inflamed | BMP8A     | protein_cc | chr1  | 39957318 | 39991607 | + | 1692  | 75.3389  | 0.00716  | -0.5092  | 0.162727 | -3.12917 | 0.002303 | 0.013394 | 1 |
| ENSG0000 response | Inflamed | SOX5      | protein_cc | chr12 | 23682440 | 24103966 | - | 8879  | 73.12172 | 0.011933 | -0.65099 | 0.208057 | -3.12889 | 0.002305 | 0.013403 | 1 |
| ENSG0000 response | Inflamed | PRSS16    | protein_cc | chr6  | 27215480 | 27224403 | + | 5290  | 872.1504 | 0        | 0.389618 | 0.124531 | 3.128688 | 0.002307 | 0.013409 | 1 |
| ENSG0000 response | Inflamed | PEBP1P2   | pseudoger  | chr2  | 85568404 | 85568961 | - | 558   | 4.973747 | 0.174224 | 0.388904 | 0.124307 | 3.128573 | 0.002308 | 0.01341  | 1 |
| ENSG0000 response | Inflamed | PPP4R4    | protein_cc | chr14 | 94612465 | 94746072 | + | 4974  | 8.357995 | 0.288783 | -0.74188 | 0.23714  | -3.12844 | 0.002309 | 0.013413 | 1 |
| ENSG0000 response | Inflamed | RP5-903G2 | lincRNA    | chr11 | 67702034 | 67707245 | - | 455   | 9.739857 | 0.052506 | 0.573242 | 0.183253 | 3.12815  | 0.002311 | 0.013422 | 1 |
| ENSG0000 response | Inflamed | PGLYRP4   | protein_cc | chr1  | 1.53E+08 | 1.53E+08 | - | 2272  | 8.789976 | 0.341289 | -0.76357 | 0.244108 | -3.12799 | 0.002312 | 0.013425 | 1 |
| ENSG0000 response | Inflamed | MTRNR2L1  | protein_cc | chr11 | 10529434 | 10530723 | - | 1290  | 323.3699 | 0        | 0.631649 | 0.20198  | 3.127291 | 0.002317 | 0.013452 | 1 |
| ENSG0000 response | Inflamed | RP11-310E | antisense  | chr10 | 96988000 | 96990901 | - | 663   | 1.205251 | 0.658711 | 0.342286 | 0.109457 | 3.12713  | 0.002318 | 0.013455 | 1 |
| ENSG0000 response | Inflamed | RP11-216E | antisense  | chr9  | 1.31E+08 | 1.31E+08 | - | 1242  | 11.63962 | 0.011933 | -0.35555 | 0.113718 | -3.12661 | 0.002322 | 0.013473 | 1 |
| ENSG0000 response | Inflamed | ABCA7     | protein_cc | chr19 | 1040102  | 1065571  | + | 8365  | 1866.019 | 0        | -0.44749 | 0.143124 | -3.12657 | 0.002322 | 0.013473 | 1 |
| ENSG0000 response | Inflamed | CCL19     | protein_cc | chr9  | 34689564 | 34691274 | - | 777   | 1284.773 | 0.002387 | -1.41088 | 0.451328 | -3.12607 | 0.002326 | 0.013491 | 1 |
| ENSG0000 response | Inflamed | TJP3      | protein_cc | chr19 | 3708107  | 3750811  | + | 4259  | 8760.375 | 0        | 0.689    | 0.220409 | 3.125999 | 0.002326 | 0.013491 | 1 |
| ENSG0000 response | Inflamed | PGAP2     | protein_cc | chr11 | 3818954  | 3847601  | + | 3781  | 814.315  | 0        | 0.204653 | 0.065481 | 3.12539  | 0.00233  | 0.013513 | 1 |
| ENSG0000 response | Inflamed | C2orf72   | protein_cc | chr2  | 2.32E+08 | 2.32E+08 | + | 3851  | 2670.654 | 0        | 0.687018 | 0.219854 | 3.124883 | 0.002334 | 0.013531 | 1 |
| ENSG0000 response | Inflamed | RP1-93H11 | lincRNA    | chr6  | 1.17E+08 | 1.17E+08 | + | 701   | 7.417661 | 0.116945 | -0.5152  | 0.164879 | -3.12469 | 0.002336 | 0.013537 | 1 |
| ENSG0000 response | Inflamed | SRGAP2B   | pseudoger  | chr1  | 1.44E+08 | 1.44E+08 | + | 1427  | 97.46778 | 0.016706 | -0.52213 | 0.167122 | -3.12424 | 0.002339 | 0.013552 | 1 |
| ENSG0000 response | Inflamed | EAPP      | protein_cc | chr14 | 34985135 | 35008916 | - | 2022  | 1189.048 | 0        | 0.275533 | 0.088208 | 3.123668 | 0.002343 | 0.013573 | 1 |
| ENSG0000 response | Inflamed | CD6       | protein_cc | chr11 | 60739115 | 60787849 | + | 5995  | 1086.957 | 0        | -0.545   | 0.174492 | -3.12333 | 0.002345 | 0.013584 | 1 |
| ENSG0000 response | Inflamed | IGKV1D-12 | IG_V_gene  | chr2  | 90198535 | 90199190 | + | 532   | 1896.802 | 0.002387 | -1.12866 | 0.361432 | -3.12273 | 0.00235  | 0.013606 | 1 |
| ENSG0000 response | Inflamed | CHID1     | protein_cc | chr11 | 867357   | 915058   | - | 6265  | 1799.453 | 0        | -0.22767 | 0.072913 | -3.12248 | 0.002352 | 0.013614 | 1 |
| ENSG0000 response | Inflamed | KLHL32    | protein_cc | chr6  | 97372605 | 97588630 | + | 3777  | 40.72792 | 0.016706 | 0.684863 | 0.219339 | 3.1224   | 0.002352 | 0.013614 | 1 |
| ENSG0000 response | Inflamed | FGF5      | protein_cc | chr4  | 81187753 | 81257834 | + | 5998  | 3.210024 | 0.644391 | -0.75125 | 0.240616 | -3.12221 | 0.002354 | 0.013618 | 1 |
| ENSG0000 response | Inflamed | FRAS1     | protein_cc | chr4  | 78978724 | 79465423 | + | 18960 | 304.148  | 0.01432  | 1.050878 | 0.336586 | 3.122168 | 0.002354 | 0.013618 | 1 |
| ENSG0000 response | Inflamed | SNX22     | protein_cc | chr15 | 64443914 | 64449680 | + | 5767  | 164.8186 | 0.002387 | -0.85744 | 0.274663 | -3.12179 | 0.002357 | 0.013631 | 1 |
| ENSG0000 response | Inflamed | DHX32     | protein_cc | chr10 | 1.28E+08 | 1.28E+08 | - | 3948  | 1668.062 | 0        | 0.446947 | 0.143177 | 3.121644 | 0.002358 | 0.013634 | 1 |
| ENSG0000 response | Inflamed | POLR2D    | protein_cc | chr2  | 1.29E+08 | 1.29E+08 | - | 2511  | 717.58   | 0        | -0.27205 | 0.087171 | -3.12091 | 0.002363 | 0.013662 | 1 |
| ENSG0000 response | Inflamed | RP11-242C | sense_intr | chrX  | 30716324 | 30740049 | + | 562   | 16.67303 | 0.107399 | -0.8127  | 0.260423 | -3.1207  | 0.002364 | 0.013668 | 1 |
| ENSG0000 response | Inflamed | RP11-192F | antisense  | chr17 | 26934981 | 26936748 | + | 1083  | 2.880668 | 0.405728 | -0.46829 | 0.15009  | -3.12009 | 0.002369 | 0.01369  | 1 |
| ENSG0000 response | Inflamed | SOWAHB    | protein_cc | chr4  | 77816082 | 77819002 | - | 2921  | 980.0907 | 0.002387 | 0.661899 | 0.212144 | 3.120045 | 0.002369 | 0.01369  | 1 |
| ENSG0000 response | Inflamed | GCGR      | protein_cc | chr17 | 79762008 | 79771889 | + | 3241  | 11.27446 | 0.155131 | -0.67909 | 0.21766  | -3.11996 | 0.00237  | 0.01369  | 1 |
| ENSG0000 response | Inflamed | FGD5P1    | pseudoger  | chr3  | 13974553 | 13978977 | + | 3872  | 3.599045 | 0.305489 | -0.45905 | 0.147157 | -3.11946 | 0.002374 | 0.013709 | 1 |
| ENSG0000 response | Inflamed | C2CD4C    | protein_cc | chr19 | 405438   | 409139   | - | 3098  | 41.73508 | 0.016706 | -0.58613 | 0.187921 | -3.11902 | 0.002377 | 0.013724 | 1 |

|                   |          |           |                  |          |          |   |       |          |          |          |          |          |          |          |   |
|-------------------|----------|-----------|------------------|----------|----------|---|-------|----------|----------|----------|----------|----------|----------|----------|---|
| ENSG0000 response | Inflamed | RIPK4     | protein_cc chr21 | 43159529 | 43187266 | - | 4267  | 833.2411 | 0        | 0.547175 | 0.175448 | 3.11873  | 0.002379 | 0.013733 | 1 |
| ENSG0000 response | Inflamed | QKI       | protein_cc chr6  | 1.64E+08 | 1.64E+08 | + | 17368 | 1653.747 | 0        | -0.6172  | 0.197936 | -3.11815 | 0.002383 | 0.013753 | 1 |
| ENSG0000 response | Inflamed | SCARF2    | protein_cc chr22 | 20778874 | 20792146 | - | 3602  | 396.6897 | 0        | -0.56211 | 0.180273 | -3.11811 | 0.002383 | 0.013753 | 1 |
| ENSG0000 response | Inflamed | RP11-737C | antisense chr18  | 2920964  | 2921683  | + | 720   | 7.052506 | 0.131265 | -0.52889 | 0.169633 | -3.11786 | 0.002385 | 0.013761 | 1 |
| ENSG0000 response | Inflamed | TRAPPC2P  | protein_cc chr19 | 57874879 | 57876721 | + | 1843  | 65.15274 | 0        | -0.37021 | 0.118742 | -3.11779 | 0.002386 | 0.013761 | 1 |
| ENSG0000 response | Inflamed | TRAM2     | protein_cc chr6  | 52362200 | 52441713 | - | 6908  | 6144.842 | 0        | -0.39173 | 0.125651 | -3.11761 | 0.002387 | 0.013766 | 1 |
| ENSG0000 response | Inflamed | RP11-145M | lincRNA chr3     | 1.79E+08 | 1.79E+08 | - | 2089  | 277.8878 | 0        | -0.63887 | 0.204946 | -3.11728 | 0.00239  | 0.013777 | 1 |
| ENSG0000 response | Inflamed | LUM       | protein_cc chr12 | 91496406 | 91505608 | - | 3008  | 8378.463 | 0        | -0.72297 | 0.231938 | -3.11708 | 0.002391 | 0.013782 | 1 |
| ENSG0000 response | Inflamed | CARNS1    | protein_cc chr11 | 67182439 | 67193078 | + | 5670  | 74.26969 | 0        | -0.50565 | 0.162246 | -3.11653 | 0.002395 | 0.013802 | 1 |
| ENSG0000 response | Inflamed | TCF15     | protein_cc chr20 | 584441   | 591042   | - | 1555  | 7.553699 | 0.102625 | -0.57691 | 0.18512  | -3.11642 | 0.002396 | 0.013802 | 1 |
| ENSG0000 response | Inflamed | FAM150B   | protein_cc chr2  | 279558   | 288851   | - | 2191  | 154.4797 | 0        | 0.538816 | 0.172896 | 3.116412 | 0.002396 | 0.013802 | 1 |
| ENSG0000 response | Inflamed | WSCD2     | protein_cc chr12 | 1.09E+08 | 1.09E+08 | + | 6557  | 18.41766 | 0.0358   | -0.53348 | 0.171218 | -3.11582 | 0.0024   | 0.013824 | 1 |
| ENSG0000 response | Inflamed | LINC00238 | processed_chr14  | 66953072 | 66965271 | + | 1417  | 7.739857 | 0.260143 | 0.614642 | 0.19727  | 3.115744 | 0.002401 | 0.013824 | 1 |
| ENSG0000 response | Inflamed | EGOT      | lincRNA chr3     | 4790876  | 4793274  | - | 1464  | 2.381862 | 0.541766 | -0.51315 | 0.164718 | -3.11531 | 0.002404 | 0.013837 | 1 |
| ENSG0000 response | Inflamed | ADCK2     | protein_cc chr7  | 1.4E+08  | 1.4E+08  | + | 2913  | 1347.542 | 0        | 0.269399 | 0.086476 | 3.115291 | 0.002404 | 0.013837 | 1 |
| ENSG0000 response | Inflamed | XXbac-B47 | antisense chr22  | 18559293 | 18561650 | - | 2235  | 201.4511 | 0        | 0.6196   | 0.198894 | 3.115227 | 0.002405 | 0.013837 | 1 |
| ENSG0000 response | Inflamed | AC108004  | antisense chr17  | 254326   | 263814   | - | 1223  | 4.887828 | 0.329356 | -0.66304 | 0.212874 | -3.11473 | 0.002408 | 0.013855 | 1 |
| ENSG0000 response | Inflamed | BCAS4     | protein_cc chr20 | 49411431 | 49493714 | + | 2084  | 101.5322 | 0        | -0.65499 | 0.210302 | -3.11454 | 0.00241  | 0.01386  | 1 |
| ENSG0000 response | Inflamed | RP11-147L | antisense chr17  | 66242770 | 66244079 | - | 1310  | 2.441527 | 0.429594 | -0.39729 | 0.127586 | -3.11387 | 0.002415 | 0.013886 | 1 |
| ENSG0000 response | Inflamed | PROM1     | protein_cc chr4  | 15964699 | 16086001 | - | 7465  | 2961.778 | 0        | 0.732575 | 0.235295 | 3.113435 | 0.002418 | 0.013899 | 1 |
| ENSG0000 response | Inflamed | AGAP1     | protein_cc chr2  | 2.36E+08 | 2.37E+08 | + | 13896 | 3369.623 | 0        | 0.413384 | 0.132774 | 3.113433 | 0.002418 | 0.013899 | 1 |
| ENSG0000 response | Inflamed | C6        | protein_cc chr5  | 41142336 | 41261540 | - | 4739  | 11.81384 | 0.162291 | 0.659247 | 0.211754 | 3.113275 | 0.002419 | 0.013902 | 1 |
| ENSG0000 response | Inflamed | MS4A3     | protein_cc chr11 | 59824060 | 59838601 | + | 2095  | 3.639618 | 0.410501 | -0.48992 | 0.157391 | -3.11277 | 0.002423 | 0.013921 | 1 |
| ENSG0000 response | Inflamed | CD3D      | protein_cc chr11 | 1.18E+08 | 1.18E+08 | - | 929   | 374.4081 | 0        | -0.54738 | 0.175871 | -3.11242 | 0.002426 | 0.013933 | 1 |
| ENSG0000 response | Inflamed | COQ10A    | protein_cc chr12 | 56660642 | 56664750 | + | 3243  | 258.6396 | 0        | -0.33912 | 0.108966 | -3.11221 | 0.002427 | 0.013939 | 1 |
| ENSG0000 response | Inflamed | ELOVL4    | protein_cc chr6  | 80624529 | 80657297 | - | 3042  | 31.91647 | 0.01432  | -0.55472 | 0.17827  | -3.11167 | 0.002431 | 0.013959 | 1 |
| ENSG0000 response | Inflamed | AC064875  | processed_chr2   | 13106910 | 13147138 | - | 2846  | 1.859189 | 0.534606 | -0.39274 | 0.126257 | -3.11062 | 0.002439 | 0.014001 | 1 |
| ENSG0000 response | Inflamed | PF4V1     | protein_cc chr4  | 74718906 | 74719872 | + | 522   | 13.55609 | 0.252983 | -0.83135 | 0.267276 | -3.11045 | 0.00244  | 0.014005 | 1 |
| ENSG0000 response | Inflamed | RP11-409k | pseudoger chr9   | 1.33E+08 | 1.33E+08 | - | 341   | 1.844869 | 0.49642  | -0.33845 | 0.108831 | -3.10991 | 0.002445 | 0.014023 | 1 |
| ENSG0000 response | Inflamed | HLA-DRA   | protein_cc chr6  | 32407619 | 32412823 | + | 1280  | 23569.27 | 0        | -0.48671 | 0.156503 | -3.1099  | 0.002445 | 0.014023 | 1 |
| ENSG0000 response | Inflamed | WWC2      | protein_cc chr4  | 1.84E+08 | 1.84E+08 | + | 9966  | 310.0143 | 0.004773 | -0.61268 | 0.19708  | -3.10878 | 0.002453 | 0.014069 | 1 |
| ENSG0000 response | Inflamed | LRRC38    | protein_cc chr1  | 13801445 | 13840543 | - | 2209  | 1.119332 | 0.756563 | -0.40444 | 0.13013  | -3.10793 | 0.002459 | 0.0141   | 1 |
| ENSG0000 response | Inflamed | HOOK2     | protein_cc chr19 | 12873817 | 12983554 | - | 5950  | 2355.437 | 0        | 0.367743 | 0.118324 | 3.10792  | 0.00246  | 0.0141   | 1 |
| ENSG0000 response | Inflamed | IGLV5-37  | IG_V_gene chr22  | 22781876 | 22782371 | + | 374   | 313.9833 | 0.059666 | -1.21757 | 0.391816 | -3.10751 | 0.002463 | 0.014114 | 1 |
| ENSG0000 response | Inflamed | LRRC29    | protein_cc chr16 | 67241042 | 67260951 | - | 2807  | 60.34129 | 0        | -0.35482 | 0.114186 | -3.10743 | 0.002463 | 0.014114 | 1 |
| ENSG0000 response | Inflamed | RP4-773A1 | antisense chr1   | 1.12E+08 | 1.12E+08 | + | 2131  | 8.357995 | 0.062053 | -0.54399 | 0.175064 | -3.10739 | 0.002464 | 0.014114 | 1 |
| ENSG0000 response | Inflamed | JAG2      | protein_cc chr14 | 1.06E+08 | 1.06E+08 | - | 6397  | 630.5012 | 0        | -0.57419 | 0.184799 | -3.1071  | 0.002466 | 0.014123 | 1 |
| ENSG0000 response | Inflamed | ROR2      | protein_cc chr9  | 94325373 | 94712444 | - | 5818  | 557.1742 | 0        | -0.47139 | 0.151725 | -3.10686 | 0.002468 | 0.01413  | 1 |
| ENSG0000 response | Inflamed | GPR124    | protein_cc chr8  | 37641709 | 37702414 | + | 7061  | 3262.11  | 0        | -0.6906  | 0.222296 | -3.10665 | 0.002469 | 0.014136 | 1 |
| ENSG0000 response | Inflamed | ISG15     | protein_cc chr1  | 948803   | 949920   | + | 711   | 970.6301 | 0        | -0.52651 | 0.169506 | -3.10613 | 0.002473 | 0.014156 | 1 |

|                   |          |           |                  |          |          |   |       |          |          |          |          |          |          |          |   |
|-------------------|----------|-----------|------------------|----------|----------|---|-------|----------|----------|----------|----------|----------|----------|----------|---|
| ENSG0000 response | Inflamed | ANK3      | protein_cc chr10 | 61786056 | 62493248 | - | 24624 | 1177.726 | 0        | 0.696332 | 0.224192 | 3.105962 | 0.002474 | 0.014159 | 1 |
| ENSG0000 response | Inflamed | C3orf18   | protein_cc chr3  | 50595462 | 50608458 | - | 3242  | 186.253  | 0        | -0.39744 | 0.127962 | -3.10592 | 0.002475 | 0.014159 | 1 |
| ENSG0000 response | Inflamed | RNVU1-14  | snRNA chr1       | 1.48E+08 | 1.48E+08 | + | 164   | 1.761337 | 0.563246 | -0.3868  | 0.124547 | -3.10566 | 0.002477 | 0.014167 | 1 |
| ENSG0000 response | Inflamed | YBX3      | protein_cc chr12 | 10851683 | 10875911 | - | 8615  | 4829.919 | 0        | -0.24488 | 0.078859 | -3.10525 | 0.00248  | 0.014182 | 1 |
| ENSG0000 response | Inflamed | RGS4      | protein_cc chr1  | 1.63E+08 | 1.63E+08 | + | 4836  | 76.06921 | 0.019093 | -0.90762 | 0.292294 | -3.10516 | 0.00248  | 0.014183 | 1 |
| ENSG0000 response | Inflamed | SRRM3     | protein_cc chr7  | 75831216 | 75916605 | + | 6878  | 126.8019 | 0        | -0.46328 | 0.149211 | -3.10488 | 0.002483 | 0.014192 | 1 |
| ENSG0000 response | Inflamed | PHLDB2    | protein_cc chr3  | 1.11E+08 | 1.12E+08 | + | 12109 | 447.4726 | 0.002387 | -0.60711 | 0.195547 | -3.10468 | 0.002484 | 0.014198 | 1 |
| ENSG0000 response | Inflamed | GAPDHP14  | pseudoger chr21  | 30594642 | 30595578 | + | 937   | 3.615752 | 0.410501 | -0.52984 | 0.170665 | -3.10455 | 0.002485 | 0.0142   | 1 |
| ENSG0000 response | Inflamed | USB1      | protein_cc chr16 | 58033450 | 58055522 | + | 7298  | 2823.955 | 0        | -0.20765 | 0.066886 | -3.1045  | 0.002486 | 0.0142   | 1 |
| ENSG0000 response | Inflamed | GRIN3B    | protein_cc chr19 | 1000418  | 1009731  | + | 3281  | 4.465394 | 0.267303 | -0.52831 | 0.170187 | -3.1043  | 0.002487 | 0.014205 | 1 |
| ENSG0000 response | Inflamed | CCDC167   | protein_cc chr6  | 37450696 | 37467698 | - | 619   | 296.3389 | 0        | -0.43821 | 0.141176 | -3.104   | 0.002489 | 0.014215 | 1 |
| ENSG0000 response | Inflamed | LIPH      | protein_cc chr3  | 1.85E+08 | 1.85E+08 | - | 4122  | 4190.971 | 0        | 0.739615 | 0.23833  | 3.10332  | 0.002495 | 0.014242 | 1 |
| ENSG0000 response | Inflamed | C15orf26  | protein_cc chr15 | 81299374 | 81441516 | + | 1979  | 5.460621 | 0.24821  | -0.54732 | 0.176405 | -3.10265 | 0.0025   | 0.014268 | 1 |
| ENSG0000 response | Inflamed | MAP7D3    | protein_cc chrX  | 1.35E+08 | 1.35E+08 | - | 7065  | 175.2673 | 0        | -0.52626 | 0.169621 | -3.10255 | 0.002501 | 0.014269 | 1 |
| ENSG0000 response | Inflamed | ADAMTS14  | protein_cc chr10 | 72432559 | 72522197 | + | 5269  | 875.7255 | 0        | -0.51458 | 0.165966 | -3.1005  | 0.002516 | 0.014356 | 1 |
| ENSG0000 response | Inflamed | PIFO      | protein_cc chr1  | 1.12E+08 | 1.12E+08 | + | 4261  | 13.38902 | 0.040573 | -0.62292 | 0.200926 | -3.10024 | 0.002518 | 0.014365 | 1 |
| ENSG0000 response | Inflamed | FAM50A    | protein_cc chrX  | 1.54E+08 | 1.54E+08 | + | 2567  | 1663.391 | 0        | -0.16855 | 0.054376 | -3.09972 | 0.002522 | 0.014385 | 1 |
| ENSG0000 response | Inflamed | FXD2      | protein_cc chr11 | 1.18E+08 | 1.18E+08 | - | 5595  | 16.37232 | 0.009547 | -0.47569 | 0.153478 | -3.0994  | 0.002525 | 0.014396 | 1 |
| ENSG0000 response | Inflamed | SLFN5     | protein_cc chr17 | 33570055 | 33600674 | + | 10709 | 1257.589 | 0        | -0.72202 | 0.23296  | -3.09932 | 0.002525 | 0.014396 | 1 |
| ENSG0000 response | Inflamed | RP11-273E | antisense chr12  | 7281675  | 7283794  | - | 1179  | 5.410501 | 0.21957  | -0.54348 | 0.175363 | -3.09915 | 0.002527 | 0.0144   | 1 |
| ENSG0000 response | Inflamed | B3GALT6   | protein_cc chr1  | 1167629  | 1170421  | + | 2793  | 722.685  | 0        | -0.27137 | 0.08757  | -3.09894 | 0.002528 | 0.014405 | 1 |
| ENSG0000 response | Inflamed | RP11-379k | antisense chr3   | 1.7E+08  | 1.7E+08  | + | 1781  | 36.18138 | 0.004773 | 0.620085 | 0.200098 | 3.098906 | 0.002529 | 0.014405 | 1 |
| ENSG0000 response | Inflamed | CHAT      | protein_cc chr10 | 50817141 | 50901925 | + | 3100  | 20.44153 | 0.214797 | 0.774822 | 0.25011  | 3.09793  | 0.002536 | 0.014445 | 1 |
| ENSG0000 response | Inflamed | PTK7      | protein_cc chr6  | 43044006 | 43129457 | + | 9024  | 2335.623 | 0        | -0.56983 | 0.183949 | -3.09775 | 0.002538 | 0.01445  | 1 |
| ENSG0000 response | Inflamed | RP11-469l | antisense chr12  | 50345295 | 50356707 | - | 1574  | 3.353222 | 0.644391 | -0.6981  | 0.225393 | -3.09724 | 0.002542 | 0.014469 | 1 |
| ENSG0000 response | Inflamed | VPS51     | protein_cc chr11 | 64856796 | 64879332 | + | 4878  | 6538.914 | 0        | 0.252788 | 0.081642 | 3.096295 | 0.002549 | 0.014508 | 1 |
| ENSG0000 response | Inflamed | CCDC88B   | protein_cc chr11 | 64107695 | 64125006 | + | 8331  | 3875.611 | 0        | -0.48995 | 0.15825  | -3.09604 | 0.002551 | 0.014517 | 1 |
| ENSG0000 response | Inflamed | AGPAT2    | protein_cc chr9  | 1.4E+08  | 1.4E+08  | - | 1798  | 7915.365 | 0        | 0.418516 | 0.135204 | 3.095443 | 0.002556 | 0.01454  | 1 |
| ENSG0000 response | Inflamed | NR4A3     | protein_cc chr9  | 1.03E+08 | 1.03E+08 | + | 6314  | 301.5823 | 0.011933 | -1.10996 | 0.35865  | -3.09482 | 0.002561 | 0.014565 | 1 |
| ENSG0000 response | Inflamed | RP11-685l | protein_cc chr2  | 90537839 | 90538397 | - | 384   | 1.806683 | 0.699284 | -0.54465 | 0.175999 | -3.09462 | 0.002562 | 0.01457  | 1 |
| ENSG0000 response | Inflamed | MT-ND5    | protein_cc chrM  | 12337    | 14148    | + | 1812  | 559923.9 | 0        | 0.358238 | 0.115775 | 3.094255 | 0.002565 | 0.014582 | 1 |
| ENSG0000 response | Inflamed | TMEM254   | protein_cc chr10 | 81838402 | 81852313 | + | 2996  | 1028.912 | 0        | 0.347449 | 0.11229  | 3.094223 | 0.002565 | 0.014582 | 1 |
| ENSG0000 response | Inflamed | CTD-2020l | antisense chr17  | 43322553 | 43326203 | - | 1073  | 26.79475 | 0        | 0.390303 | 0.126144 | 3.094119 | 0.002566 | 0.014584 | 1 |
| ENSG0000 response | Inflamed | GUCY2C    | protein_cc chr12 | 14765576 | 14849519 | - | 4167  | 2425.296 | 0        | 0.798143 | 0.257995 | 3.093639 | 0.00257  | 0.014602 | 1 |
| ENSG0000 response | Inflamed | ROM1      | protein_cc chr11 | 62379194 | 62382592 | + | 2495  | 80.55847 | 0        | -0.2699  | 0.087249 | -3.09348 | 0.002571 | 0.014606 | 1 |
| ENSG0000 response | Inflamed | C10orf71  | protein_cc chr10 | 50507187 | 50535537 | + | 5467  | 4.329356 | 0.431981 | -0.68709 | 0.222157 | -3.09284 | 0.002576 | 0.014629 | 1 |
| ENSG0000 response | Inflamed | HOXA6     | protein_cc chr7  | 27185015 | 27190222 | - | 1285  | 230.8687 | 0.016706 | 0.714384 | 0.230981 | 3.092822 | 0.002576 | 0.014629 | 1 |
| ENSG0000 response | Inflamed | SGK223    | protein_cc chr8  | 8175258  | 8244008  | - | 4892  | 1724.205 | 0        | 0.513988 | 0.166206 | 3.092472 | 0.002579 | 0.01464  | 1 |
| ENSG0000 response | Inflamed | CBLN3     | protein_cc chr14 | 24895738 | 24900160 | - | 2562  | 208.9499 | 0        | -0.53959 | 0.174488 | -3.09244 | 0.002579 | 0.01464  | 1 |
| ENSG0000 response | Inflamed | RNF208    | protein_cc chr9  | 1.4E+08  | 1.4E+08  | - | 1142  | 135.0692 | 0        | 0.347169 | 0.112283 | 3.091921 | 0.002584 | 0.01466  | 1 |

|                   |          |           |            |       |          |          |   |       |          |          |          |          |          |          |          |   |
|-------------------|----------|-----------|------------|-------|----------|----------|---|-------|----------|----------|----------|----------|----------|----------|----------|---|
| ENSG0000 response | Inflamed | IGHV4-28  | IG_V_gene  | chr14 | 1.07E+08 | 1.07E+08 | - | 423   | 155.4463 | 0.01432  | -0.95438 | 0.30871  | -3.09152 | 0.002587 | 0.014675 | 1 |
| ENSG0000 response | Inflamed | CNGA1     | protein_cc | chr4  | 47937994 | 48018689 | - | 3581  | 82.36754 | 0.011933 | 0.735781 | 0.238017 | 3.091299 | 0.002588 | 0.014682 | 1 |
| ENSG0000 response | Inflamed | MT-TI     | Mt_tRNA    | chrM  | 4263     | 4331     | + | 69    | 132.1504 | 0.004773 | 0.631025 | 0.204197 | 3.090274 | 0.002597 | 0.014725 | 1 |
| ENSG0000 response | Inflamed | DPYD      | protein_cc | chr1  | 97543299 | 98386605 | - | 6556  | 648.0621 | 0        | -0.54463 | 0.176247 | -3.09012 | 0.002598 | 0.014728 | 1 |
| ENSG0000 response | Inflamed | AGR2      | protein_cc | chr7  | 16831435 | 16873057 | - | 2845  | 35855.39 | 0        | 0.735173 | 0.237941 | 3.089731 | 0.002601 | 0.014743 | 1 |
| ENSG0000 response | Inflamed | TMTC1     | protein_cc | chr12 | 29653773 | 29937692 | - | 14636 | 627.6205 | 0        | -0.72527 | 0.234747 | -3.08957 | 0.002602 | 0.014747 | 1 |
| ENSG0000 response | Inflamed | RASD2     | protein_cc | chr22 | 35936915 | 35950048 | + | 3412  | 1118.21  | 0        | 0.462939 | 0.149842 | 3.089509 | 0.002603 | 0.014747 | 1 |
| ENSG0000 response | Inflamed | RP11-529J | pseudoger  | chr15 | 23675986 | 23680359 | + | 736   | 2.362768 | 0.446301 | -0.43491 | 0.140812 | -3.08857 | 0.00261  | 0.014782 | 1 |
| ENSG0000 response | Inflamed | CTNS      | protein_cc | chr17 | 3539762  | 3564836  | + | 3398  | 788.0692 | 0        | -0.21285 | 0.068915 | -3.08851 | 0.002611 | 0.014782 | 1 |
| ENSG0000 response | Inflamed | C9orf3    | protein_cc | chr9  | 97488983 | 97849441 | + | 11443 | 1097.63  | 0        | -0.25819 | 0.083597 | -3.08851 | 0.002611 | 0.014782 | 1 |
| ENSG0000 response | Inflamed | RP11-88H  | lincRNA    | chr1  | 1.13E+08 | 1.13E+08 | + | 3590  | 40.01671 | 0.02148  | -0.85391 | 0.276565 | -3.08754 | 0.002618 | 0.014823 | 1 |
| ENSG0000 response | Inflamed | OCRL      | protein_cc | chrX  | 1.29E+08 | 1.29E+08 | + | 5779  | 2025.434 | 0        | 0.382983 | 0.124051 | 3.087317 | 0.00262  | 0.01483  | 1 |
| ENSG0000 response | Inflamed | HOXA-AS4  | antisense  | chr7  | 27208238 | 27211534 | + | 1654  | 161.3198 | 0        | 0.321258 | 0.104071 | 3.086919 | 0.002623 | 0.014845 | 1 |
| ENSG0000 response | Inflamed | ANKRD18L  | pseudoger  | chr3  | 1.98E+08 | 1.98E+08 | - | 3449  | 1.260143 | 0.694511 | -0.36782 | 0.119156 | -3.08686 | 0.002624 | 0.014845 | 1 |
| ENSG0000 response | Inflamed | PODN      | protein_cc | chr1  | 53527854 | 53551174 | + | 4770  | 699.179  | 0        | -0.62819 | 0.203554 | -3.08613 | 0.00263  | 0.014874 | 1 |
| ENSG0000 response | Inflamed | RP11-353M | lincRNA    | chr17 | 77797251 | 77801503 | + | 1788  | 3.042959 | 0.408115 | 0.402028 | 0.130271 | 3.086078 | 0.00263  | 0.014874 | 1 |
| ENSG0000 response | Inflamed | TRAF3IP3  | protein_cc | chr1  | 2.1E+08  | 2.1E+08  | + | 7753  | 803.6897 | 0        | -0.63059 | 0.204346 | -3.0859  | 0.002632 | 0.014879 | 1 |
| ENSG0000 response | Inflamed | KNDC1     | protein_cc | chr10 | 1.35E+08 | 1.35E+08 | + | 7991  | 25.60621 | 0.033413 | -0.60164 | 0.194979 | -3.08569 | 0.002633 | 0.014885 | 1 |
| ENSG0000 response | Inflamed | RP11-665C | pseudoger  | chr14 | 55707340 | 55707798 | - | 459   | 0.849642 | 0.787589 | 0.293926 | 0.095258 | 3.085595 | 0.002634 | 0.014886 | 1 |
| ENSG0000 response | Inflamed | GJA9      | protein_cc | chr1  | 39330175 | 39347289 | - | 3250  | 1.653938 | 0.582339 | 0.422796 | 0.137027 | 3.085502 | 0.002635 | 0.014887 | 1 |
| ENSG0000 response | Inflamed | TRAPPC6A  | protein_cc | chr19 | 45666186 | 45681495 | - | 933   | 431.5776 | 0        | 0.345451 | 0.111969 | 3.085247 | 0.002637 | 0.014896 | 1 |
| ENSG0000 response | Inflamed | CDS1      | protein_cc | chr4  | 85504132 | 85572491 | + | 4461  | 1747.351 | 0        | 0.650267 | 0.2108   | 3.084758 | 0.002641 | 0.014913 | 1 |
| ENSG0000 response | Inflamed | DISP2     | protein_cc | chr15 | 40650436 | 40663257 | + | 5171  | 827.5561 | 0        | 0.6215   | 0.201477 | 3.084724 | 0.002641 | 0.014913 | 1 |
| ENSG0000 response | Inflamed | AC005220  | antisense  | chr20 | 52556699 | 52559047 | + | 884   | 1.902148 | 0.563246 | -0.41472 | 0.134447 | -3.08465 | 0.002642 | 0.014913 | 1 |
| ENSG0000 response | Inflamed | GUCD1     | protein_cc | chr22 | 24936406 | 24951903 | - | 4514  | 7168.158 | 0        | 0.242348 | 0.078567 | 3.084581 | 0.002642 | 0.014913 | 1 |
| ENSG0000 response | Inflamed | TMEM88    | protein_cc | chr17 | 7758383  | 7759417  | + | 875   | 95.45346 | 0        | -0.36448 | 0.118188 | -3.08391 | 0.002648 | 0.014938 | 1 |
| ENSG0000 response | Inflamed | TRO       | protein_cc | chrX  | 54946895 | 54957864 | + | 6716  | 230.4057 | 0        | -0.53669 | 0.17403  | -3.08389 | 0.002648 | 0.014938 | 1 |
| ENSG0000 response | Inflamed | OSR1      | protein_cc | chr2  | 19551246 | 19558414 | - | 5313  | 91.33174 | 0.00716  | 0.894934 | 0.29022  | 3.083636 | 0.00265  | 0.014947 | 1 |
| ENSG0000 response | Inflamed | RP11-115k | antisense  | chr17 | 36105206 | 36108563 | + | 660   | 22.98329 | 0.078759 | 0.801102 | 0.259798 | 3.083559 | 0.002651 | 0.014947 | 1 |
| ENSG0000 response | Inflamed | DLGAP1-A  | antisense  | chr18 | 3593730  | 3598350  | + | 2105  | 201.6539 | 0        | -0.35886 | 0.116384 | -3.08343 | 0.002652 | 0.01495  | 1 |
| ENSG0000 response | Inflamed | SNX30     | protein_cc | chr9  | 1.16E+08 | 1.16E+08 | + | 11578 | 2144.167 | 0        | 0.570841 | 0.185146 | 3.083188 | 0.002654 | 0.014958 | 1 |
| ENSG0000 response | Inflamed | TVP23A    | protein_cc | chr16 | 10854776 | 10912651 | - | 5281  | 45.86396 | 0.009547 | -0.5921  | 0.192053 | -3.08302 | 0.002655 | 0.014962 | 1 |
| ENSG0000 response | Inflamed | PEX11G    | protein_cc | chr19 | 7541761  | 7562335  | - | 1466  | 156.1146 | 0        | 0.319343 | 0.103588 | 3.082812 | 0.002657 | 0.014969 | 1 |
| ENSG0000 response | Inflamed | CTC-301O  | lincRNA    | chr19 | 49834874 | 49843865 | - | 830   | 21.95227 | 0.038186 | -0.5417  | 0.175729 | -3.0826  | 0.002658 | 0.014975 | 1 |
| ENSG0000 response | Inflamed | RFX5      | protein_cc | chr1  | 1.51E+08 | 1.51E+08 | - | 4586  | 1980.043 | 0        | -0.36333 | 0.117869 | -3.0825  | 0.002659 | 0.014976 | 1 |
| ENSG0000 response | Inflamed | BICD2     | protein_cc | chr9  | 95473645 | 95527094 | - | 6427  | 1429.916 | 0        | -0.42479 | 0.137817 | -3.08227 | 0.002661 | 0.014982 | 1 |
| ENSG0000 response | Inflamed | SIDT2     | protein_cc | chr11 | 1.17E+08 | 1.17E+08 | + | 9061  | 3715.702 | 0        | 0.271374 | 0.088044 | 3.082244 | 0.002661 | 0.014982 | 1 |
| ENSG0000 response | Inflamed | AL136376  | protein_cc | chr1  | 1.17E+08 | 1.17E+08 | - | 342   | 11.10024 | 0.062053 | 0.534737 | 0.17358  | 3.08063  | 0.002674 | 0.015053 | 1 |
| ENSG0000 response | Inflamed | AP1M2     | protein_cc | chr19 | 10683347 | 10697991 | - | 2214  | 3945.671 | 0        | 0.60081  | 0.195051 | 3.08027  | 0.002677 | 0.015066 | 1 |
| ENSG0000 response | Inflamed | WDR78     | protein_cc | chr1  | 67278568 | 67390570 | - | 6700  | 183.7828 | 0        | 0.681382 | 0.221218 | 3.080137 | 0.002679 | 0.015069 | 1 |

|                   |          |           |                  |          |          |   |       |          |          |          |          |          |          |          |   |
|-------------------|----------|-----------|------------------|----------|----------|---|-------|----------|----------|----------|----------|----------|----------|----------|---|
| ENSG0000 response | Inflamed | RP11-567A | processed_chr18  | 77336460 | 77349010 | + | 6158  | 11.62291 | 0.097852 | -0.64612 | 0.209774 | -3.08008 | 0.002679 | 0.015069 | 1 |
| ENSG0000 response | Inflamed | SUSD4     | protein_cc chr1  | 2.23E+08 | 2.24E+08 | - | 4865  | 28.32936 | 0.00716  | -0.67509 | 0.219212 | -3.07963 | 0.002683 | 0.015086 | 1 |
| ENSG0000 response | Inflamed | SDHB      | protein_cc chr1  | 17345217 | 17380665 | - | 2462  | 2622.716 | 0        | 0.283935 | 0.092205 | 3.079388 | 0.002685 | 0.015094 | 1 |
| ENSG0000 response | Inflamed | OXTR      | protein_cc chr3  | 8792094  | 8811314  | - | 4514  | 16.17422 | 0.066826 | -0.58795 | 0.190957 | -3.07895 | 0.002688 | 0.015111 | 1 |
| ENSG0000 response | Inflamed | SMIM10    | protein_cc chrX  | 1.34E+08 | 1.34E+08 | + | 1534  | 64.69212 | 0.002387 | -0.48333 | 0.157007 | -3.07839 | 0.002693 | 0.015134 | 1 |
| ENSG0000 response | Inflamed | RHOG      | protein_cc chr11 | 3848208  | 3862213  | - | 1782  | 3598.527 | 0        | -0.27396 | 0.089005 | -3.07808 | 0.002695 | 0.015144 | 1 |
| ENSG0000 response | Inflamed | IGHV1-3   | IG_V_gene chr14  | 1.06E+08 | 1.06E+08 | - | 393   | 1978.205 | 0        | -1.10285 | 0.358299 | -3.07803 | 0.002696 | 0.015144 | 1 |
| ENSG0000 response | Inflamed | COX4I1    | protein_cc chr16 | 85832239 | 85840650 | + | 4792  | 9424.37  | 0        | 0.299675 | 0.097366 | 3.077815 | 0.002698 | 0.015151 | 1 |
| ENSG0000 response | Inflamed | MGAT3     | protein_cc chr22 | 39853349 | 39888199 | + | 5457  | 1357.587 | 0        | -0.43127 | 0.140143 | -3.0774  | 0.002701 | 0.015167 | 1 |
| ENSG0000 response | Inflamed | AC147651  | lincRNA chr7     | 560028   | 564869   | + | 3506  | 38.46539 | 0.002387 | 0.579835 | 0.188422 | 3.077322 | 0.002702 | 0.015167 | 1 |
| ENSG0000 response | Inflamed | SLC25A1   | protein_cc chr22 | 19163095 | 19166343 | - | 2089  | 4477.021 | 0        | 0.300777 | 0.097754 | 3.076885 | 0.002705 | 0.015184 | 1 |
| ENSG0000 response | Inflamed | WARS      | protein_cc chr14 | 1.01E+08 | 1.01E+08 | - | 6358  | 13094.11 | 0        | -0.56179 | 0.182619 | -3.07629 | 0.00271  | 0.015208 | 1 |
| ENSG0000 response | Inflamed | GLDN      | protein_cc chr15 | 51633826 | 51700210 | + | 7144  | 270.1193 | 0.00716  | 1.083227 | 0.352201 | 3.075589 | 0.002716 | 0.015238 | 1 |
| ENSG0000 response | Inflamed | VNN1      | protein_cc chr6  | 1.33E+08 | 1.33E+08 | - | 3106  | 994.7494 | 0        | -1.14079 | 0.370947 | -3.07533 | 0.002718 | 0.015246 | 1 |
| ENSG0000 response | Inflamed | ZC3H10    | protein_cc chr12 | 56511943 | 56516278 | + | 3444  | 274.5274 | 0        | -0.24475 | 0.079608 | -3.07451 | 0.002725 | 0.015282 | 1 |
| ENSG0000 response | Inflamed | PYGB      | protein_cc chr20 | 25228705 | 25278650 | + | 4474  | 21330.4  | 0        | 0.411058 | 0.133729 | 3.073819 | 0.002731 | 0.015311 | 1 |
| ENSG0000 response | Inflamed | ABCC6     | protein_cc chr16 | 16242785 | 16317379 | - | 7559  | 627.2625 | 0        | 0.597936 | 0.194544 | 3.073525 | 0.002733 | 0.015321 | 1 |
| ENSG0000 response | Inflamed | CBFA2T2   | protein_cc chr20 | 32077881 | 32237842 | + | 9457  | 2558.444 | 0        | 0.387704 | 0.12615  | 3.073349 | 0.002735 | 0.015326 | 1 |
| ENSG0000 response | Inflamed | KPNA2     | protein_cc chr17 | 66031635 | 66042958 | + | 3140  | 2209.711 | 0        | -0.37471 | 0.121931 | -3.07313 | 0.002736 | 0.015333 | 1 |
| ENSG0000 response | Inflamed | C6orf1    | protein_cc chr6  | 34214157 | 34217247 | - | 2229  | 300.7041 | 0        | -0.34813 | 0.113337 | -3.07167 | 0.002749 | 0.015398 | 1 |
| ENSG0000 response | Inflamed | FAM177B   | protein_cc chr1  | 2.23E+08 | 2.23E+08 | + | 2601  | 252.4057 | 0        | 0.640511 | 0.208555 | 3.071184 | 0.002753 | 0.015418 | 1 |
| ENSG0000 response | Inflamed | CYP4F25P  | pseudoger chr9   | 69477881 | 69478916 | + | 520   | 2.322196 | 0.546539 | 0.418609 | 0.136314 | 3.070918 | 0.002755 | 0.015426 | 1 |
| ENSG0000 response | Inflamed | UGT2B29P  | pseudoger chr4   | 69375159 | 69383365 | - | 973   | 2.627685 | 0.548926 | 0.434472 | 0.141481 | 3.070879 | 0.002755 | 0.015426 | 1 |
| ENSG0000 response | Inflamed | NRM       | protein_cc chr6  | 30655824 | 30659197 | - | 2018  | 483.9547 | 0        | -0.33998 | 0.110719 | -3.07066 | 0.002757 | 0.015433 | 1 |
| ENSG0000 response | Inflamed | OR1J2     | protein_cc chr9  | 1.25E+08 | 1.25E+08 | + | 942   | 0.988067 | 0.799523 | -0.37313 | 0.12152  | -3.07052 | 0.002758 | 0.015436 | 1 |
| ENSG0000 response | Inflamed | RP11-449I | lincRNA chr18    | 22305745 | 22509040 | + | 908   | 3.398568 | 0.386635 | 0.482586 | 0.157182 | 3.070247 | 0.002761 | 0.015446 | 1 |
| ENSG0000 response | Inflamed | C4orf26   | protein_cc chr4  | 76481258 | 76491095 | + | 2054  | 4.26969  | 0.279236 | -0.56668 | 0.184579 | -3.07012 | 0.002762 | 0.015448 | 1 |
| ENSG0000 response | Inflamed | TMEM140   | protein_cc chr7  | 1.35E+08 | 1.35E+08 | + | 2313  | 973.6778 | 0        | -0.36982 | 0.120468 | -3.06984 | 0.002764 | 0.015458 | 1 |
| ENSG0000 response | Inflamed | GRIN2A    | protein_cc chr16 | 9852376  | 10276611 | - | 10632 | 25.55847 | 0.066826 | 0.735353 | 0.239556 | 3.069648 | 0.002766 | 0.015464 | 1 |
| ENSG0000 response | Inflamed | PNMA6C    | protein_cc chrX  | 1.52E+08 | 1.52E+08 | + | 2253  | 2.682578 | 0.400955 | -0.48228 | 0.157133 | -3.06927 | 0.002769 | 0.015479 | 1 |
| ENSG0000 response | Inflamed | PLEKHH1   | protein_cc chr14 | 68000018 | 68056329 | + | 10817 | 3367.938 | 0        | 0.735184 | 0.23956  | 3.068888 | 0.002772 | 0.015493 | 1 |
| ENSG0000 response | Inflamed | C2CD2     | protein_cc chr21 | 43305221 | 43373999 | - | 8602  | 1258.193 | 0        | -0.4762  | 0.155243 | -3.06742 | 0.002785 | 0.015556 | 1 |
| ENSG0000 response | Inflamed | RP11-524I | antisense chr6   | 54704916 | 54705653 | - | 586   | 11.46062 | 0.095465 | 0.524182 | 0.170913 | 3.066954 | 0.002789 | 0.015579 | 1 |
| ENSG0000 response | Inflamed | NADSYN1   | protein_cc chr11 | 71164155 | 71235153 | + | 14970 | 5329.783 | 0        | 0.239477 | 0.078133 | 3.065006 | 0.002805 | 0.015668 | 1 |
| ENSG0000 response | Inflamed | DAB1      | protein_cc chr1  | 57460451 | 59012406 | - | 7846  | 53.3031  | 0.0358   | -0.88297 | 0.288092 | -3.06489 | 0.002806 | 0.015567 | 1 |
| ENSG0000 response | Inflamed | MOV10L1   | protein_cc chr22 | 50528308 | 50600119 | + | 6872  | 29.83532 | 0.088305 | -0.87581 | 0.285765 | -3.06481 | 0.002807 | 0.015671 | 1 |
| ENSG0000 response | Inflamed | JAKMIP2   | protein_cc chr5  | 1.47E+08 | 1.47E+08 | - | 6214  | 28.7852  | 0.023866 | -0.57004 | 0.186024 | -3.06432 | 0.002811 | 0.015685 | 1 |
| ENSG0000 response | Inflamed | AC013460  | processed_chr2   | 7561392  | 7590385  | + | 3239  | 3.770883 | 0.341289 | -0.45398 | 0.14815  | -3.06431 | 0.002811 | 0.015685 | 1 |
| ENSG0000 response | Inflamed | BARX2     | protein_cc chr11 | 1.29E+08 | 1.29E+08 | + | 4411  | 779.5274 | 0.002387 | 0.629729 | 0.205507 | 3.064272 | 0.002812 | 0.015685 | 1 |
| ENSG0000 response | Inflamed | FGFR1     | protein_cc chr8  | 38268656 | 38326352 | - | 12698 | 2406.446 | 0        | -0.6095  | 0.198909 | -3.06423 | 0.002812 | 0.015685 | 1 |

|                   |          |           |                  |          |          |   |       |          |          |          |          |          |          |          |   |
|-------------------|----------|-----------|------------------|----------|----------|---|-------|----------|----------|----------|----------|----------|----------|----------|---|
| ENSG0000 response | Inflamed | RERG      | protein_cc chr12 | 15260717 | 15501609 | - | 4157  | 111.6993 | 0.002387 | -0.68907 | 0.224923 | -3.06358 | 0.002817 | 0.015713 | 1 |
| ENSG0000 response | Inflamed | SCTR      | protein_cc chr2  | 1.2E+08  | 1.2E+08  | - | 2900  | 3.389021 | 0.441527 | 0.552757 | 0.180438 | 3.063423 | 0.002819 | 0.015716 | 1 |
| ENSG0000 response | Inflamed | RP11-362F | lincRNA chr4     | 1.42E+08 | 1.42E+08 | - | 3750  | 5.01432  | 0.405728 | -0.58754 | 0.191796 | -3.06336 | 0.002819 | 0.015716 | 1 |
| ENSG0000 response | Inflamed | CISD3     | protein_cc chr17 | 36886488 | 36891297 | + | 2663  | 2087.795 | 0        | 0.347093 | 0.113307 | 3.063301 | 0.00282  | 0.015716 | 1 |
| ENSG0000 response | Inflamed | PYGL      | protein_cc chr14 | 51324609 | 51411454 | - | 4798  | 1458.365 | 0        | -0.41229 | 0.134614 | -3.06274 | 0.002825 | 0.015737 | 1 |
| ENSG0000 response | Inflamed | RP11-598F | antisense chr12  | 215690   | 221016   | - | 586   | 2.190931 | 0.544153 | -0.4362  | 0.142423 | -3.06273 | 0.002825 | 0.015737 | 1 |
| ENSG0000 response | Inflamed | RP11-344E | lincRNA chr9     | 1.32E+08 | 1.32E+08 | + | 583   | 21.49165 | 0.01432  | -0.46394 | 0.151483 | -3.06263 | 0.002826 | 0.015738 | 1 |
| ENSG0000 response | Inflamed | CLEC11A   | protein_cc chr19 | 51226586 | 51228974 | + | 1468  | 529.8091 | 0        | -0.50177 | 0.163848 | -3.0624  | 0.002828 | 0.015746 | 1 |
| ENSG0000 response | Inflamed | FDXACB1   | protein_cc chr11 | 1.12E+08 | 1.12E+08 | - | 3551  | 66.28401 | 0        | -0.33699 | 0.110067 | -3.06164 | 0.002834 | 0.015779 | 1 |
| ENSG0000 response | Inflamed | SEPHS1P1  | pseudoger chr7   | 64312775 | 64313732 | - | 958   | 1.004773 | 0.739857 | -0.29901 | 0.097671 | -3.06138 | 0.002836 | 0.015788 | 1 |
| ENSG0000 response | Inflamed | RP5-1031C | lincRNA chr10    | 7487520  | 7513904  | - | 557   | 3.868735 | 0.331742 | -0.57511 | 0.187867 | -3.06129 | 0.002837 | 0.01579  | 1 |
| ENSG0000 response | Inflamed | SLC22A17  | protein_cc chr14 | 23815515 | 23822121 | - | 4278  | 540.5967 | 0        | -0.51333 | 0.167702 | -3.06095 | 0.00284  | 0.015803 | 1 |
| ENSG0000 response | Inflamed | CDH3      | protein_cc chr16 | 68670092 | 68756519 | + | 5009  | 1551.47  | 0.004773 | -1.14777 | 0.374989 | -3.06079 | 0.002841 | 0.015807 | 1 |
| ENSG0000 response | Inflamed | BTLA      | protein_cc chr3  | 1.12E+08 | 1.12E+08 | - | 3697  | 75.98329 | 0.002387 | -0.65537 | 0.214138 | -3.0605  | 0.002844 | 0.015817 | 1 |
| ENSG0000 response | Inflamed | CLCF1     | protein_cc chr11 | 67131639 | 67141648 | - | 1986  | 301.3461 | 0        | -0.55255 | 0.180611 | -3.05937 | 0.002854 | 0.015869 | 1 |
| ENSG0000 response | Inflamed | RP11-345F | antisense chr1   | 1549138  | 1551175  | - | 2038  | 229.7709 | 0        | 0.276274 | 0.090313 | 3.059086 | 0.002856 | 0.015879 | 1 |
| ENSG0000 response | Inflamed | MADCAM1   | protein_cc chr19 | 489176   | 505347   | + | 2441  | 733.2697 | 0        | -0.89942 | 0.294027 | -3.05895 | 0.002857 | 0.015882 | 1 |
| ENSG0000 response | Inflamed | RP11-1191 | antisense chr4   | 654998   | 655734   | - | 737   | 12.63007 | 0.064439 | -0.54657 | 0.178681 | -3.05888 | 0.002858 | 0.015882 | 1 |
| ENSG0000 response | Inflamed | ADAMTSL2  | protein_cc chr1  | 1.51E+08 | 1.51E+08 | + | 6393  | 741.6611 | 0        | -0.62164 | 0.203237 | -3.05867 | 0.00286  | 0.015883 | 1 |
| ENSG0000 response | Inflamed | PALD1     | protein_cc chr10 | 72238577 | 72328205 | + | 4555  | 534.0239 | 0.004773 | -0.49881 | 0.163308 | -3.05866 | 0.00286  | 0.015883 | 1 |
| ENSG0000 response | Inflamed | ERMN      | protein_cc chr2  | 1.58E+08 | 1.58E+08 | - | 4395  | 52.48926 | 0.031026 | -0.88974 | 0.290893 | -3.05865 | 0.00286  | 0.015883 | 1 |
| ENSG0000 response | Inflamed | NTN1      | protein_cc chr17 | 8924859  | 9147317  | + | 6431  | 1096.033 | 0.002387 | -0.86441 | 0.28263  | -3.05846 | 0.002862 | 0.015889 | 1 |
| ENSG0000 response | Inflamed | ABCG4     | protein_cc chr11 | 1.19E+08 | 1.19E+08 | + | 6268  | 17.40334 | 0.033413 | -0.54313 | 0.1776   | -3.05817 | 0.002864 | 0.0159   | 1 |
| ENSG0000 response | Inflamed | ERN2      | protein_cc chr16 | 23701647 | 23724821 | - | 4998  | 6081.905 | 0        | 0.680822 | 0.222629 | 3.0581   | 0.002865 | 0.0159   | 1 |
| ENSG0000 response | Inflamed | FLNA      | protein_cc chrX  | 1.54E+08 | 1.54E+08 | - | 10585 | 30348.32 | 0        | -0.64786 | 0.211858 | -3.05799 | 0.002866 | 0.015902 | 1 |
| ENSG0000 response | Inflamed | HUG1      | protein_cc chr10 | 1.03E+08 | 1.03E+08 | + | 1089  | 2.770883 | 0.486874 | 0.485318 | 0.158715 | 3.057788 | 0.002868 | 0.015908 | 1 |
| ENSG0000 response | Inflamed | TMC8      | protein_cc chr17 | 76126851 | 76139049 | + | 5459  | 1834.683 | 0        | -0.53793 | 0.175927 | -3.05766 | 0.002869 | 0.015911 | 1 |
| ENSG0000 response | Inflamed | RAB3IL1   | protein_cc chr11 | 61664773 | 61687741 | - | 3006  | 465.2816 | 0        | -0.48941 | 0.160067 | -3.05755 | 0.00287  | 0.015912 | 1 |
| ENSG0000 response | Inflamed | ASGR1     | protein_cc chr17 | 7076750  | 7082883  | - | 3748  | 31.24344 | 0.002387 | -0.44262 | 0.144764 | -3.05751 | 0.00287  | 0.015912 | 1 |
| ENSG0000 response | Inflamed | FGFR4     | protein_cc chr5  | 1.77E+08 | 1.77E+08 | + | 4829  | 2333.959 | 0        | 0.413326 | 0.135209 | 3.056946 | 0.002875 | 0.015935 | 1 |
| ENSG0000 response | Inflamed | POLRMTP1  | pseudoger chr17  | 60214333 | 60218000 | - | 3668  | 100.5943 | 0.002387 | 0.551633 | 0.180455 | 3.0569   | 0.002875 | 0.015935 | 1 |
| ENSG0000 response | Inflamed | OR7E91P   | pseudoger chr2   | 71256158 | 71257023 | + | 866   | 3.627685 | 0.513126 | 0.415086 | 0.135824 | 3.056055 | 0.002883 | 0.015972 | 1 |
| ENSG0000 response | Inflamed | VWA5B1    | protein_cc chr1  | 20617412 | 20681387 | + | 6377  | 12.77804 | 0.212411 | 0.657467 | 0.215181 | 3.055421 | 0.002888 | 0.016    | 1 |
| ENSG0000 response | Inflamed | CCDC80    | protein_cc chr3  | 1.12E+08 | 1.12E+08 | - | 5305  | 1488.926 | 0        | -0.8158  | 0.267018 | -3.05523 | 0.00289  | 0.016006 | 1 |
| ENSG0000 response | Inflamed | SMPDL3A   | protein_cc chr6  | 1.23E+08 | 1.23E+08 | + | 2228  | 2417.757 | 0        | 0.52204  | 0.170896 | 3.054715 | 0.002895 | 0.016027 | 1 |
| ENSG0000 response | Inflamed | CEBPA-AS1 | antisense chr19  | 33793763 | 33795960 | + | 2198  | 54.52745 | 0.002387 | 0.482623 | 0.157996 | 3.054664 | 0.002895 | 0.016027 | 1 |
| ENSG0000 response | Inflamed | DRC1      | protein_cc chr2  | 26624784 | 26679579 | + | 3048  | 1.708831 | 0.630072 | -0.39697 | 0.129965 | -3.05447 | 0.002897 | 0.016033 | 1 |
| ENSG0000 response | Inflamed | ARPC1A    | protein_cc chr7  | 98923521 | 98985787 | + | 2557  | 4597.647 | 0        | 0.232511 | 0.076124 | 3.054393 | 0.002897 | 0.016033 | 1 |
| ENSG0000 response | Inflamed | AC093484  | processed_chr17  | 16330788 | 16332033 | + | 477   | 2.976134 | 0.365155 | -0.47152 | 0.154383 | -3.05425 | 0.002899 | 0.016037 | 1 |
| ENSG0000 response | Inflamed | RP11-401C | antisense chr17  | 10223709 | 10244775 | + | 641   | 0.804296 | 0.794749 | -0.34553 | 0.113136 | -3.05415 | 0.0029   | 0.016038 | 1 |



|                   |          |           |                  |          |          |   |      |          |          |          |          |          |          |          |   |
|-------------------|----------|-----------|------------------|----------|----------|---|------|----------|----------|----------|----------|----------|----------|----------|---|
| ENSG0000 response | Inflamed | CXCL16    | protein_cc chr17 | 4636821  | 4643217  | - | 2794 | 3906.697 | 0        | -0.34842 | 0.114088 | -3.05398 | 0.002901 | 0.016043 | 1 |
| ENSG0000 response | Inflamed | STON1     | protein_cc chr2  | 48756522 | 48826025 | + | 8082 | 186.5442 | 0.002387 | -0.58295 | 0.19092  | -3.0534  | 0.002906 | 0.016068 | 1 |
| ENSG0000 response | Inflamed | KLHL22    | protein_cc chr22 | 20783528 | 20850170 | - | 5112 | 673.3986 | 0        | -0.26804 | 0.087793 | -3.05314 | 0.002908 | 0.016077 | 1 |
| ENSG0000 response | Inflamed | SYT13     | protein_cc chr11 | 45261852 | 45307870 | - | 5424 | 2066.952 | 0        | 0.600659 | 0.196754 | 3.052837 | 0.002911 | 0.016089 | 1 |
| ENSG0000 response | Inflamed | RP11-2271 | lincRNA chr15    | 48938148 | 48944213 | + | 1943 | 2.486874 | 0.429594 | -0.45796 | 0.150016 | -3.05274 | 0.002912 | 0.01609  | 1 |
| ENSG0000 response | Inflamed | GSC       | protein_cc chr14 | 95234553 | 95236562 | - | 1259 | 5.51074  | 0.341289 | -0.60998 | 0.199818 | -3.05268 | 0.002913 | 0.01609  | 1 |
| ENSG0000 response | Inflamed | DLEU1     | protein_cc chr13 | 50656307 | 51297372 | + | 9926 | 137.0286 | 0        | 0.346648 | 0.113584 | 3.051904 | 0.002919 | 0.016124 | 1 |
| ENSG0000 response | Inflamed | RAMP1     | protein_cc chr2  | 2.39E+08 | 2.39E+08 | + | 1234 | 192.2005 | 0        | -0.74601 | 0.244453 | -3.05176 | 0.002921 | 0.016128 | 1 |
| ENSG0000 response | Inflamed | RP11-4660 | lincRNA chr11    | 63534816 | 63536113 | - | 369  | 5.257757 | 0.176611 | -0.48251 | 0.158122 | -3.05153 | 0.002923 | 0.016133 | 1 |
| ENSG0000 response | Inflamed | POLN      | protein_cc chr4  | 2073645  | 2243848  | - | 7721 | 37.3389  | 0.016706 | -0.58935 | 0.193134 | -3.05152 | 0.002923 | 0.016133 | 1 |
| ENSG0000 response | Inflamed | H19       | processed_chr11  | 2016406  | 2022700  | - | 2812 | 672.0859 | 0.004773 | -1.08328 | 0.355015 | -3.05135 | 0.002924 | 0.016138 | 1 |
| ENSG0000 response | Inflamed | CTD-2024  | lincRNA chr5     | 34651562 | 34651993 | - | 432  | 1.431981 | 0.663484 | -0.43302 | 0.14192  | -3.05112 | 0.002926 | 0.016146 | 1 |
| ENSG0000 response | Inflamed | AC002055  | pseudoger chr22  | 51195376 | 51239737 | + | 4250 | 133.4153 | 0        | -0.29201 | 0.095716 | -3.05073 | 0.00293  | 0.016162 | 1 |
| ENSG0000 response | Inflamed | HIST1H3H  | protein_cc chr6  | 27777842 | 27778314 | + | 473  | 38.63007 | 0.004773 | 0.480105 | 0.157381 | 3.050597 | 0.002931 | 0.016165 | 1 |
| ENSG0000 response | Inflamed | ZNF366    | protein_cc chr5  | 71738479 | 71803554 | - | 3975 | 197.8759 | 0.009547 | -0.63225 | 0.207294 | -3.05004 | 0.002936 | 0.016189 | 1 |
| ENSG0000 response | Inflamed | RP11-2041 | lincRNA chr9     | 41961615 | 42019580 | - | 1890 | 9.045346 | 0.114558 | 0.504978 | 0.165573 | 3.049883 | 0.002937 | 0.016193 | 1 |
| ENSG0000 response | Inflamed | EFCAB5    | protein_cc chr17 | 28256218 | 28435470 | + | 6928 | 21.24344 | 0.01432  | 0.5366   | 0.175981 | 3.049195 | 0.002944 | 0.016224 | 1 |
| ENSG0000 response | Inflamed | RP4-740C  | processed_chr1   | 2281853  | 2284259  | - | 2407 | 90.20048 | 0.002387 | 0.46695  | 0.153161 | 3.048759 | 0.002947 | 0.016242 | 1 |
| ENSG0000 response | Inflamed | PIP5K1B   | protein_cc chr9  | 71320575 | 71624092 | + | 4673 | 2190.625 | 0        | 0.53457  | 0.175354 | 3.048526 | 0.00295  | 0.01625  | 1 |
| ENSG0000 response | Inflamed | ECHS1     | protein_cc chr10 | 1.35E+08 | 1.35E+08 | - | 1617 | 6080.167 | 0        | 0.279324 | 0.091634 | 3.04824  | 0.002952 | 0.016258 | 1 |
| ENSG0000 response | Inflamed | RP3-462E2 | lincRNA chr12    | 1.12E+08 | 1.12E+08 | + | 571  | 29.61337 | 0.033413 | 0.697814 | 0.228925 | 3.048218 | 0.002952 | 0.016258 | 1 |
| ENSG0000 response | Inflamed | TKT       | protein_cc chr3  | 53258723 | 53290068 | - | 9507 | 9892.785 | 0        | -0.22603 | 0.074157 | -3.04807 | 0.002954 | 0.01626  | 1 |
| ENSG0000 response | Inflamed | RP11-815J | pseudoger chr18  | 12067172 | 12068416 | - | 1148 | 2.205251 | 0.415274 | -0.34733 | 0.113952 | -3.04805 | 0.002954 | 0.01626  | 1 |
| ENSG0000 response | Inflamed | SNAP25    | protein_cc chr20 | 10199478 | 10288066 | + | 3357 | 38.1432  | 0.011933 | -0.64462 | 0.211493 | -3.04796 | 0.002955 | 0.016261 | 1 |
| ENSG0000 response | Inflamed | KRT8P30   | pseudoger chr2   | 2.2E+08  | 2.2E+08  | - | 650  | 0.789976 | 0.789976 | 0.236287 | 0.077537 | 3.047402 | 0.00296  | 0.016285 | 1 |
| ENSG0000 response | Inflamed | MT1H      | protein_cc chr16 | 56703726 | 56705041 | + | 723  | 317.8496 | 0        | 0.925956 | 0.303916 | 3.04675  | 0.002966 | 0.016314 | 1 |
| ENSG0000 response | Inflamed | TRIM3     | protein_cc chr11 | 6469843  | 6495689  | - | 6710 | 1498.723 | 0        | 0.367071 | 0.120524 | 3.045621 | 0.002976 | 0.016366 | 1 |
| ENSG0000 response | Inflamed | HPDL      | protein_cc chr1  | 45792545 | 45794347 | + | 1803 | 261.2601 | 0        | 0.513767 | 0.168705 | 3.045365 | 0.002978 | 0.016376 | 1 |
| ENSG0000 response | Inflamed | EIF4EBP2  | protein_cc chr10 | 72164135 | 72188374 | + | 7257 | 10725.23 | 0        | 0.327499 | 0.107564 | 3.044695 | 0.002984 | 0.016406 | 1 |
| ENSG0000 response | Inflamed | RP11-368J | pseudoger chr16  | 22557019 | 22588186 | + | 2661 | 6.582339 | 0.085919 | -0.46681 | 0.153337 | -3.04433 | 0.002987 | 0.01642  | 1 |
| ENSG0000 response | Inflamed | HIST1H2B  | protein_cc chr6  | 26251879 | 26252303 | + | 425  | 37.38425 | 0        | 0.453332 | 0.148928 | 3.043975 | 0.002991 | 0.016435 | 1 |
| ENSG0000 response | Inflamed | CHRNA6    | protein_cc chr8  | 42607763 | 42651535 | - | 2596 | 5.520286 | 0.346062 | -0.60862 | 0.2      | -3.04308 | 0.002999 | 0.016476 | 1 |
| ENSG0000 response | Inflamed | CDR2L     | protein_cc chr17 | 72983727 | 73001895 | + | 3536 | 639.2005 | 0        | -0.56297 | 0.185025 | -3.0427  | 0.003002 | 0.016492 | 1 |
| ENSG0000 response | Inflamed | TEX19     | protein_cc chr17 | 80317123 | 80321652 | + | 1936 | 1.396181 | 0.651551 | -0.39897 | 0.131129 | -3.04261 | 0.003003 | 0.016493 | 1 |
| ENSG0000 response | Inflamed | RASGRP1   | protein_cc chr15 | 38780304 | 38857776 | - | 6090 | 315.9451 | 0.002387 | -0.69357 | 0.227962 | -3.04249 | 0.003004 | 0.016495 | 1 |
| ENSG0000 response | Inflamed | COA3      | protein_cc chr17 | 40947165 | 40950722 | - | 1922 | 1671.179 | 0        | 0.303931 | 0.09992  | 3.041748 | 0.003011 | 0.016529 | 1 |
| ENSG0000 response | Inflamed | SDCBP2    | protein_cc chr20 | 1290619  | 1309883  | - | 2044 | 7207.637 | 0        | 0.559855 | 0.184065 | 3.041616 | 0.003012 | 0.016531 | 1 |
| ENSG0000 response | Inflamed | RP1-134E1 | sense_intr chr6  | 1.07E+08 | 1.07E+08 | + | 454  | 3.73747  | 0.374702 | -0.49279 | 0.162018 | -3.04156 | 0.003013 | 0.016531 | 1 |
| ENSG0000 response | Inflamed | BLK       | protein_cc chr8  | 11351510 | 11422113 | + | 4803 | 403.2458 | 0.002387 | -0.91105 | 0.299543 | -3.04145 | 0.003014 | 0.016533 | 1 |
| ENSG0000 response | Inflamed | RP11-284  | antisense chr12  | 20514666 | 20523196 | - | 525  | 3.381862 | 0.322196 | 0.404055 | 0.132864 | 3.041106 | 0.003017 | 0.016547 | 1 |

|                   |          |           |                  |          |          |   |       |          |          |          |          |          |          |          |   |
|-------------------|----------|-----------|------------------|----------|----------|---|-------|----------|----------|----------|----------|----------|----------|----------|---|
| ENSG0000 response | Inflamed | SIRT2     | protein_cc chr19 | 39369197 | 39390502 | - | 6204  | 2065.757 | 0        | -0.17137 | 0.056357 | -3.04088 | 0.003019 | 0.016555 | 1 |
| ENSG0000 response | Inflamed | ECHDC2    | protein_cc chr1  | 53361656 | 53392884 | - | 11498 | 2735.37  | 0        | 0.46084  | 0.151554 | 3.040766 | 0.00302  | 0.016558 | 1 |
| ENSG0000 response | Inflamed | STAT5B    | protein_cc chr17 | 40351186 | 40428725 | - | 6447  | 3587.181 | 0        | -0.3373  | 0.110956 | -3.03995 | 0.003027 | 0.016595 | 1 |
| ENSG0000 response | Inflamed | SLC12A5   | protein_cc chr20 | 44650356 | 44688784 | + | 7520  | 25.78043 | 0        | -0.46465 | 0.152968 | -3.03758 | 0.003049 | 0.016711 | 1 |
| ENSG0000 response | Inflamed | CTD-2517I | antisense chr8   | 1.46E+08 | 1.46E+08 | + | 338   | 32.14558 | 0.016706 | 0.430411 | 0.141721 | 3.037033 | 0.003054 | 0.016736 | 1 |
| ENSG0000 response | Inflamed | PHF21B    | protein_cc chr22 | 45277042 | 45405880 | - | 5753  | 5.009547 | 0.26253  | -0.55626 | 0.183175 | -3.03674 | 0.003057 | 0.016747 | 1 |
| ENSG0000 response | Inflamed | RP11-355I | sense_ove chr14  | 62577593 | 62579268 | + | 1676  | 1.112172 | 0.727924 | -0.36609 | 0.120558 | -3.03663 | 0.003058 | 0.016747 | 1 |
| ENSG0000 response | Inflamed | ADM       | protein_cc chr11 | 10326227 | 10328944 | + | 2718  | 2536.186 | 0        | -0.56522 | 0.186137 | -3.0366  | 0.003058 | 0.016747 | 1 |
| ENSG0000 response | Inflamed | SCN1B     | protein_cc chr19 | 35521588 | 35531352 | + | 4625  | 221.1074 | 0        | -0.53117 | 0.174926 | -3.03652 | 0.003059 | 0.016747 | 1 |
| ENSG0000 response | Inflamed | PHF21A    | protein_cc chr11 | 45950871 | 46142985 | - | 11449 | 1441.186 | 0        | -0.40079 | 0.131996 | -3.03635 | 0.003061 | 0.016753 | 1 |
| ENSG0000 response | Inflamed | RP11-247L | lincRNA chr14    | 50863731 | 50865063 | + | 501   | 4.183771 | 0.22673  | 0.422348 | 0.139114 | 3.035983 | 0.003064 | 0.016768 | 1 |
| ENSG0000 response | Inflamed | NRIP2     | protein_cc chr12 | 2934514  | 2944710  | - | 2803  | 151.8616 | 0.004773 | -0.63463 | 0.209043 | -3.03587 | 0.003065 | 0.01677  | 1 |
| ENSG0000 response | Inflamed | AC002511  | lincRNA chr19    | 35923859 | 35925544 | - | 1000  | 62.52267 | 0.009547 | 0.631852 | 0.208156 | 3.035474 | 0.003069 | 0.016787 | 1 |
| ENSG0000 response | Inflamed | SLC25A38  | protein_cc chr3  | 39424839 | 39438842 | + | 2151  | 1532.148 | 0        | 0.210361 | 0.069304 | 3.035343 | 0.00307  | 0.01679  | 1 |
| ENSG0000 response | Inflamed | C8orf48   | protein_cc chr8  | 13424352 | 13425796 | + | 1445  | 8.322196 | 0.064439 | -0.48596 | 0.16011  | -3.03515 | 0.003072 | 0.016796 | 1 |
| ENSG0000 response | Inflamed | SLC26A6   | protein_cc chr3  | 48663156 | 48672926 | - | 6373  | 3176.695 | 0        | 0.350683 | 0.115581 | 3.034088 | 0.003082 | 0.016847 | 1 |
| ENSG0000 response | Inflamed | AC104655  | lincRNA chr2     | 1.06E+08 | 1.06E+08 | + | 1009  | 2.770883 | 0.400955 | 0.429349 | 0.141541 | 3.033388 | 0.003088 | 0.016879 | 1 |
| ENSG0000 response | Inflamed | APPL2     | protein_cc chr12 | 1.06E+08 | 1.06E+08 | - | 5124  | 3958.251 | 0        | 0.501455 | 0.165339 | 3.032882 | 0.003093 | 0.016901 | 1 |
| ENSG0000 response | Inflamed | ANTXR1    | protein_cc chr2  | 69240310 | 69476459 | + | 8185  | 3473.363 | 0        | -0.56387 | 0.185955 | -3.03229 | 0.003099 | 0.016928 | 1 |
| ENSG0000 response | Inflamed | DHRS4L2   | protein_cc chr14 | 24439148 | 24475617 | + | 2902  | 648.4773 | 0        | 0.227512 | 0.07504  | 3.031861 | 0.003103 | 0.016941 | 1 |
| ENSG0000 response | Inflamed | IQCG      | protein_cc chr3  | 1.98E+08 | 1.98E+08 | - | 7474  | 187.7088 | 0        | -0.4188  | 0.138132 | -3.03185 | 0.003103 | 0.016941 | 1 |
| ENSG0000 response | Inflamed | LINC00365 | lincRNA chr13    | 30677315 | 30683012 | - | 2998  | 12.30788 | 0.090692 | 0.634246 | 0.209196 | 3.031835 | 0.003103 | 0.016941 | 1 |
| ENSG0000 response | Inflamed | GPRC5B    | protein_cc chr16 | 19868616 | 19897489 | - | 6064  | 785.6587 | 0        | -0.55458 | 0.182924 | -3.03174 | 0.003104 | 0.016943 | 1 |
| ENSG0000 response | Inflamed | ADCY3     | protein_cc chr2  | 25042038 | 25142708 | - | 6058  | 2077.153 | 0        | -0.38315 | 0.126445 | -3.03017 | 0.003118 | 0.01702  | 1 |
| ENSG0000 response | Inflamed | PPFIBP2   | protein_cc chr11 | 7534529  | 7678358  | + | 9617  | 1794.48  | 0        | 0.334608 | 0.110441 | 3.029759 | 0.003122 | 0.017037 | 1 |
| ENSG0000 response | Inflamed | SLC23A1   | protein_cc chr5  | 1.39E+08 | 1.39E+08 | - | 3203  | 220.5776 | 0        | 0.65969  | 0.21778  | 3.029161 | 0.003128 | 0.017062 | 1 |
| ENSG0000 response | Inflamed | CTD-2278I | sense_intr chr19 | 17407005 | 17407504 | - | 500   | 6.515513 | 0.143198 | -0.44211 | 0.145951 | -3.02913 | 0.003128 | 0.017062 | 1 |
| ENSG0000 response | Inflamed | SPCS2     | protein_cc chr11 | 74660292 | 74690076 | + | 2979  | 2037.351 | 0        | -0.31175 | 0.10292  | -3.02904 | 0.003129 | 0.017062 | 1 |
| ENSG0000 response | Inflamed | NID1      | protein_cc chr1  | 2.36E+08 | 2.36E+08 | - | 5864  | 6265.389 | 0        | -0.61915 | 0.204407 | -3.029   | 0.00313  | 0.017062 | 1 |
| ENSG0000 response | Inflamed | COX7B     | protein_cc chrX  | 77154935 | 77162870 | + | 3024  | 2913.995 | 0        | 0.379871 | 0.125418 | 3.028844 | 0.003131 | 0.017067 | 1 |
| ENSG0000 response | Inflamed | LMAN2     | protein_cc chr5  | 1.77E+08 | 1.77E+08 | - | 2357  | 6333.258 | 0        | -0.16966 | 0.056022 | -3.02842 | 0.003135 | 0.017085 | 1 |
| ENSG0000 response | Inflamed | CKLF      | protein_cc chr16 | 66586466 | 66600154 | + | 1161  | 275.2196 | 0        | -0.38018 | 0.125555 | -3.02801 | 0.003139 | 0.017103 | 1 |
| ENSG0000 response | Inflamed | CRYBB1    | protein_cc chr22 | 26995242 | 27014052 | - | 1102  | 13.45107 | 0.016706 | -0.49702 | 0.164172 | -3.0274  | 0.003145 | 0.017131 | 1 |
| ENSG0000 response | Inflamed | CCDC33    | protein_cc chr15 | 74509613 | 74628813 | + | 5275  | 2.193317 | 0.470167 | 0.365972 | 0.120912 | 3.026758 | 0.003151 | 0.017161 | 1 |
| ENSG0000 response | Inflamed | AC096677  | protein_cc chr1  | 2.02E+08 | 2.02E+08 | + | 726   | 19.02864 | 0.050119 | -0.55563 | 0.183585 | -3.02655 | 0.003153 | 0.017168 | 1 |
| ENSG0000 response | Inflamed | SCN11A    | protein_cc chr3  | 38887260 | 38992052 | - | 7705  | 15.93795 | 0.066826 | -0.67923 | 0.224433 | -3.02642 | 0.003154 | 0.017171 | 1 |
| ENSG0000 response | Inflamed | FAM3A     | protein_cc chrX  | 1.54E+08 | 1.54E+08 | - | 6240  | 2142.458 | 0        | 0.205911 | 0.068052 | 3.025799 | 0.00316  | 0.017198 | 1 |
| ENSG0000 response | Inflamed | SNX18     | protein_cc chr5  | 53813589 | 53842415 | + | 6652  | 875.8735 | 0        | -0.45595 | 0.150691 | -3.02577 | 0.00316  | 0.017198 | 1 |
| ENSG0000 response | Inflamed | CRAT      | protein_cc chr9  | 1.32E+08 | 1.32E+08 | - | 3803  | 3977.907 | 0        | 0.333879 | 0.110352 | 3.025592 | 0.003162 | 0.017203 | 1 |
| ENSG0000 response | Inflamed | CYP2W1    | protein_cc chr7  | 1022835  | 1029276  | + | 2773  | 84.33652 | 0.026253 | 1.113243 | 0.367995 | 3.025161 | 0.003166 | 0.017222 | 1 |

|                   |          |           |                  |          |          |   |       |          |          |          |          |          |          |          |   |
|-------------------|----------|-----------|------------------|----------|----------|---|-------|----------|----------|----------|----------|----------|----------|----------|---|
| ENSG0000 response | Inflamed | TRPC6     | protein_cc chr11 | 1.01E+08 | 1.02E+08 | - | 5537  | 130.7184 | 0.002387 | -0.7039  | 0.23272  | -3.02468 | 0.003171 | 0.017244 | 1 |
| ENSG0000 response | Inflamed | MYO5B     | protein_cc chr18 | 47349183 | 47721463 | - | 10490 | 7266.301 | 0        | 0.547794 | 0.181159 | 3.023825 | 0.003179 | 0.017285 | 1 |
| ENSG0000 response | Inflamed | GHITM     | protein_cc chr10 | 85899196 | 85913001 | + | 2128  | 7557.444 | 0        | 0.296579 | 0.098095 | 3.023382 | 0.003183 | 0.017304 | 1 |
| ENSG0000 response | Inflamed | RASEF     | protein_cc chr9  | 85594500 | 85678092 | - | 6649  | 1798.592 | 0        | 0.789003 | 0.261027 | 3.022687 | 0.00319  | 0.017337 | 1 |
| ENSG0000 response | Inflamed | TBKBP1    | protein_cc chr17 | 45771447 | 45789416 | + | 4280  | 406.611  | 0        | -0.51005 | 0.168749 | -3.02252 | 0.003191 | 0.017342 | 1 |
| ENSG0000 response | Inflamed | C17orf99  | protein_cc chr17 | 76142434 | 76162258 | + | 2763  | 7.198091 | 0.176611 | -0.56564 | 0.187146 | -3.02244 | 0.003192 | 0.017343 | 1 |
| ENSG0000 response | Inflamed | LNX2      | protein_cc chr13 | 28120050 | 28194541 | - | 4625  | 1128.444 | 0        | 0.495827 | 0.16407  | 3.022042 | 0.003196 | 0.01736  | 1 |
| ENSG0000 response | Inflamed | RP11-432I | antisense chr16  | 71657611 | 71660719 | - | 465   | 9.522673 | 0.100239 | 0.509174 | 0.168493 | 3.021925 | 0.003197 | 0.017363 | 1 |
| ENSG0000 response | Inflamed | HRCT1     | protein_cc chr9  | 35906189 | 35907138 | + | 950   | 598.8807 | 0        | 0.731474 | 0.242082 | 3.0216   | 0.0032   | 0.017376 | 1 |
| ENSG0000 response | Inflamed | TBX15     | protein_cc chr1  | 1.19E+08 | 1.2E+08  | - | 3806  | 16.06683 | 0.157518 | -0.82522 | 0.273117 | -3.0215  | 0.003201 | 0.017378 | 1 |
| ENSG0000 response | Inflamed | RP11-404F | antisense chr1   | 1.61E+08 | 1.61E+08 | + | 1933  | 12.56563 | 0.100239 | -0.68822 | 0.22778  | -3.02141 | 0.003202 | 0.017379 | 1 |
| ENSG0000 response | Inflamed | BSG       | protein_cc chr19 | 571297   | 583493   | + | 3770  | 35587.35 | 0        | 0.286991 | 0.094999 | 3.020997 | 0.003206 | 0.017397 | 1 |
| ENSG0000 response | Inflamed | C19orf66  | protein_cc chr19 | 10196798 | 10203928 | + | 4341  | 1549.747 | 0        | -0.27866 | 0.092242 | -3.02094 | 0.003207 | 0.017397 | 1 |
| ENSG0000 response | Inflamed | CD248     | protein_cc chr11 | 66081958 | 66084515 | - | 2558  | 1297.298 | 0        | -0.7804  | 0.258341 | -3.0208  | 0.003208 | 0.0174   | 1 |
| ENSG0000 response | Inflamed | RP11-203J | processed_chr9   | 1.31E+08 | 1.31E+08 | - | 1160  | 107.1814 | 0.01432  | 0.877767 | 0.290593 | 3.020608 | 0.00321  | 0.017407 | 1 |
| ENSG0000 response | Inflamed | MIR378I   | miRNA chr22      | 42319226 | 42319301 | - | 76    | 20.28878 | 0.136038 | -0.77968 | 0.258126 | -3.02054 | 0.003211 | 0.017407 | 1 |
| ENSG0000 response | Inflamed | TRIM50    | protein_cc chr7  | 72726535 | 72742085 | - | 2490  | 10.15036 | 0.078759 | 0.584529 | 0.193529 | 3.020377 | 0.003212 | 0.017411 | 1 |
| ENSG0000 response | Inflamed | RP11-588I | antisense chr12  | 70861860 | 70932859 | + | 2407  | 18.01193 | 0.047733 | -0.65414 | 0.216578 | -3.02032 | 0.003213 | 0.017411 | 1 |
| ENSG0000 response | Inflamed | GNB1L     | protein_cc chr22 | 19770747 | 19842462 | - | 6988  | 151.3174 | 0        | -0.30863 | 0.10219  | -3.02019 | 0.003214 | 0.017413 | 1 |
| ENSG0000 response | Inflamed | RP11-731F | lincRNA chr14    | 1.06E+08 | 1.06E+08 | - | 1003  | 5.942721 | 0.303103 | -0.66161 | 0.219064 | -3.02016 | 0.003214 | 0.017413 | 1 |
| ENSG0000 response | Inflamed | HEYL      | protein_cc chr1  | 40089825 | 40105617 | - | 3750  | 345.9928 | 0.002387 | -0.63792 | 0.211268 | -3.01947 | 0.003221 | 0.017445 | 1 |
| ENSG0000 response | Inflamed | SDF2L1    | protein_cc chr22 | 21996550 | 21998587 | + | 1099  | 1467.002 | 0        | -0.39852 | 0.132033 | -3.01834 | 0.003232 | 0.017501 | 1 |
| ENSG0000 response | Inflamed | CX3CR1    | protein_cc chr3  | 39304985 | 39323226 | - | 3655  | 110.6897 | 0.004773 | -0.65835 | 0.218186 | -3.01737 | 0.003241 | 0.017549 | 1 |
| ENSG0000 response | Inflamed | RPSAP9    | pseudoger chr9   | 79013615 | 79014502 | + | 888   | 41.62053 | 0        | 0.343922 | 0.114009 | 3.016631 | 0.003249 | 0.017584 | 1 |
| ENSG0000 response | Inflamed | TRPC7-AS1 | antisense chr5   | 1.36E+08 | 1.36E+08 | + | 460   | 38.10024 | 0.019093 | 0.630948 | 0.209171 | 3.016424 | 0.003251 | 0.017592 | 1 |
| ENSG0000 response | Inflamed | SEC14L2   | protein_cc chr22 | 30792846 | 30821305 | + | 5984  | 215.2411 | 0        | -0.59216 | 0.196321 | -3.01629 | 0.003252 | 0.017595 | 1 |
| ENSG0000 response | Inflamed | EN2       | protein_cc chr7  | 1.55E+08 | 1.55E+08 | + | 3395  | 1.625298 | 0.622912 | -0.45584 | 0.151145 | -3.0159  | 0.003256 | 0.017612 | 1 |
| ENSG0000 response | Inflamed | RP11-428J | lincRNA chr6     | 5030206  | 5043683  | + | 1489  | 34.50119 | 0.002387 | -0.30628 | 0.101563 | -3.01568 | 0.003258 | 0.017621 | 1 |
| ENSG0000 response | Inflamed | CD3G      | protein_cc chr11 | 1.18E+08 | 1.18E+08 | + | 3836  | 239.0525 | 0.002387 | -0.51516 | 0.170835 | -3.01552 | 0.00326  | 0.017622 | 1 |
| ENSG0000 response | Inflamed | CTD-2611C | sense_intr chr19 | 56220529 | 56220899 | + | 371   | 5.374702 | 0.288783 | 0.539042 | 0.178756 | 3.015515 | 0.00326  | 0.017622 | 1 |
| ENSG0000 response | Inflamed | PCDH19    | protein_cc chrX  | 99546642 | 99665271 | - | 9756  | 277.6897 | 0.002387 | 0.793141 | 0.263054 | 3.015132 | 0.003263 | 0.017639 | 1 |
| ENSG0000 response | Inflamed | PIAS3     | protein_cc chr1  | 1.46E+08 | 1.46E+08 | + | 4805  | 1193.344 | 0        | -0.28701 | 0.095192 | -3.01505 | 0.003264 | 0.01764  | 1 |
| ENSG0000 response | Inflamed | RP11-434I | pseudoger chr17  | 20458284 | 20462723 | - | 739   | 1.064439 | 0.74463  | 0.296722 | 0.098416 | 3.01497  | 0.003265 | 0.01764  | 1 |
| ENSG0000 response | Inflamed | VWA3B     | protein_cc chr2  | 98703579 | 98929762 | + | 8307  | 65.66587 | 0.002387 | 0.434925 | 0.144286 | 3.014325 | 0.003271 | 0.017671 | 1 |
| ENSG0000 response | Inflamed | PHF1      | protein_cc chr6  | 33378176 | 33384230 | + | 3596  | 1883.363 | 0        | -0.29764 | 0.098756 | -3.01388 | 0.003276 | 0.01769  | 1 |
| ENSG0000 response | Inflamed | RP11-748I | pseudoger chr11  | 1.01E+08 | 1.01E+08 | + | 2371  | 1.584726 | 0.603819 | -0.39635 | 0.131509 | -3.01383 | 0.003276 | 0.01769  | 1 |
| ENSG0000 response | Inflamed | HSD17B2   | protein_cc chr16 | 82068609 | 82132139 | + | 2688  | 2667.847 | 0        | 0.66114  | 0.219406 | 3.013323 | 0.003281 | 0.017713 | 1 |
| ENSG0000 response | Inflamed | SOX7      | protein_cc chr8  | 10581278 | 10697357 | - | 3701  | 129.253  | 0.01432  | -0.65828 | 0.218465 | -3.01321 | 0.003282 | 0.017716 | 1 |
| ENSG0000 response | Inflamed | FMO4      | protein_cc chr1  | 1.71E+08 | 1.71E+08 | + | 2517  | 199.7041 | 0        | 0.561468 | 0.186349 | 3.012996 | 0.003284 | 0.017723 | 1 |
| ENSG0000 response | Inflamed | KLHL14    | protein_cc chr18 | 30252634 | 30353025 | - | 4992  | 35.9284  | 0.042959 | -0.82007 | 0.272228 | -3.01243 | 0.00329  | 0.01775  | 1 |

|                   |          |           |                  |          |          |   |       |          |          |          |          |          |          |          |   |
|-------------------|----------|-----------|------------------|----------|----------|---|-------|----------|----------|----------|----------|----------|----------|----------|---|
| ENSG0000 response | Inflamed | PKP2      | protein_cc chr12 | 32943679 | 33049774 | - | 6069  | 7225.189 | 0        | 0.714639 | 0.23724  | 3.012308 | 0.003291 | 0.017753 | 1 |
| ENSG0000 response | Inflamed | HIST1H2AI | protein_cc chr6  | 27860477 | 27860963 | - | 487   | 4.355609 | 0.150358 | 0.374985 | 0.12449  | 3.012168 | 0.003293 | 0.017757 | 1 |
| ENSG0000 response | Inflamed | CTD-2589t | pseudoger chr5   | 767512   | 769046   | - | 225   | 2.694511 | 0.51074  | 0.459602 | 0.15261  | 3.011612 | 0.003298 | 0.017776 | 1 |
| ENSG0000 response | Inflamed | AC004771  | pseudoger chr17  | 4890302  | 4890972  | + | 669   | 3.343675 | 0.355609 | 0.430215 | 0.142853 | 3.011589 | 0.003298 | 0.017776 | 1 |
| ENSG0000 response | Inflamed | TNK1      | protein_cc chr17 | 7283853  | 7293093  | + | 3860  | 1313.993 | 0        | 0.290969 | 0.096617 | 3.011558 | 0.003299 | 0.017776 | 1 |
| ENSG0000 response | Inflamed | ZNF295-AS | lincRNA chr21    | 43429303 | 43445060 | + | 3320  | 3.78043  | 0.486874 | -0.59548 | 0.197734 | -3.01153 | 0.003299 | 0.017776 | 1 |
| ENSG0000 response | Inflamed | ARPC5L    | protein_cc chr9  | 1.28E+08 | 1.28E+08 | + | 3601  | 1714.48  | 0        | -0.21219 | 0.070463 | -3.01138 | 0.0033   | 0.017781 | 1 |
| ENSG0000 response | Inflamed | C19orf26  | protein_cc chr19 | 1228286  | 1238026  | - | 4543  | 38.70406 | 0.01432  | -0.70519 | 0.234189 | -3.01122 | 0.003302 | 0.017786 | 1 |
| ENSG0000 response | Inflamed | MIR29B1   | lincRNA chr7     | 1.31E+08 | 1.31E+08 | - | 6692  | 91.76134 | 0.004773 | -0.72874 | 0.242052 | -3.01069 | 0.003307 | 0.017811 | 1 |
| ENSG0000 response | Inflamed | PXK       | protein_cc chr3  | 58318607 | 58411748 | + | 5249  | 756.6921 | 0        | -0.40018 | 0.132931 | -3.01045 | 0.00331  | 0.017819 | 1 |
| ENSG0000 response | Inflamed | CYP2A7    | protein_cc chr19 | 41381344 | 41388657 | - | 2583  | 1.806683 | 0.680191 | 0.421879 | 0.140141 | 3.010396 | 0.00331  | 0.017819 | 1 |
| ENSG0000 response | Inflamed | LPA       | protein_cc chr6  | 1.61E+08 | 1.61E+08 | - | 6490  | 2.72315  | 0.551313 | 0.4176   | 0.138731 | 3.010132 | 0.003313 | 0.017827 | 1 |
| ENSG0000 response | Inflamed | SLC23A2   | protein_cc chr20 | 4833002  | 4990939  | - | 7523  | 1968.041 | 0        | -0.42478 | 0.141119 | -3.01011 | 0.003313 | 0.017827 | 1 |
| ENSG0000 response | Inflamed | RP11-148C | antisense chr8   | 11410733 | 11411716 | - | 435   | 2.26253  | 0.651551 | -0.4606  | 0.153066 | -3.00916 | 0.003323 | 0.017875 | 1 |
| ENSG0000 response | Inflamed | ARSI      | protein_cc chr5  | 1.5E+08  | 1.5E+08  | - | 3269  | 175.1766 | 0.002387 | -0.67868 | 0.225553 | -3.00897 | 0.003325 | 0.017881 | 1 |
| ENSG0000 response | Inflamed | RP11-693J | lincRNA chr12    | 92860227 | 92885867 | + | 10626 | 25.59666 | 0.071599 | -0.78964 | 0.262467 | -3.00855 | 0.003329 | 0.0179   | 1 |
| ENSG0000 response | Inflamed | TSPAN3    | protein_cc chr15 | 77336359 | 77376326 | - | 5893  | 16189.42 | 0        | 0.382051 | 0.12701  | 3.008047 | 0.003334 | 0.017921 | 1 |
| ENSG0000 response | Inflamed | KIAA1462  | protein_cc chr10 | 30301729 | 30404423 | - | 9515  | 726.4558 | 0.00716  | -0.71961 | 0.239229 | -3.00803 | 0.003334 | 0.017921 | 1 |
| ENSG0000 response | Inflamed | TLR10     | protein_cc chr4  | 38773860 | 38784611 | - | 4217  | 188.4702 | 0.002387 | -0.98712 | 0.328221 | -3.00748 | 0.00334  | 0.017946 | 1 |
| ENSG0000 response | Inflamed | OVCH1-AS  | protein_cc chr12 | 29542227 | 29640421 | + | 1841  | 5.107399 | 0.360382 | -0.56199 | 0.186865 | -3.00743 | 0.00334  | 0.017946 | 1 |
| ENSG0000 response | Inflamed | MAGI1-IT1 | sense_intr chr3  | 65858490 | 65940233 | - | 2567  | 7.680191 | 0.143198 | 0.574293 | 0.190964 | 3.007328 | 0.003341 | 0.017948 | 1 |
| ENSG0000 response | Inflamed | NPM1P39   | pseudoger chr1   | 27533421 | 27534287 | + | 867   | 2.778043 | 0.324582 | 0.373145 | 0.124081 | 3.007255 | 0.003342 | 0.017948 | 1 |
| ENSG0000 response | Inflamed | KCNC1     | protein_cc chr11 | 17756359 | 17804602 | + | 9842  | 13.84487 | 0.083532 | 0.686319 | 0.228228 | 3.007168 | 0.003343 | 0.017949 | 1 |
| ENSG0000 response | Inflamed | TMOD1     | protein_cc chr9  | 1E+08    | 1E+08    | + | 3708  | 192.1909 | 0.004773 | -0.65007 | 0.216201 | -3.0068  | 0.003346 | 0.017965 | 1 |
| ENSG0000 response | Inflamed | BRPF3     | protein_cc chr6  | 36164521 | 36200567 | + | 6618  | 4837.955 | 0        | 0.336606 | 0.111969 | 3.006244 | 0.003352 | 0.017992 | 1 |
| ENSG0000 response | Inflamed | C6orf223  | protein_cc chr6  | 43968317 | 43973695 | + | 3917  | 399.2267 | 0        | -0.77725 | 0.258689 | -3.00457 | 0.003369 | 0.018079 | 1 |
| ENSG0000 response | Inflamed | CCNF      | protein_cc chr16 | 2479395  | 2508855  | + | 6309  | 775.2434 | 0        | -0.38216 | 0.127209 | -3.00417 | 0.003373 | 0.018097 | 1 |
| ENSG0000 response | Inflamed | CLDN16    | protein_cc chr3  | 1.9E+08  | 1.9E+08  | + | 3583  | 4.646778 | 0.389021 | -0.66653 | 0.221903 | -3.00369 | 0.003378 | 0.018119 | 1 |
| ENSG0000 response | Inflamed | CA14      | protein_cc chr1  | 1.5E+08  | 1.5E+08  | + | 3838  | 9.610979 | 0.105012 | 0.511317 | 0.170271 | 3.002952 | 0.003385 | 0.018154 | 1 |
| ENSG0000 response | Inflamed | RP3-322G  | antisense chr20  | 23337231 | 23338753 | - | 841   | 9.701671 | 0.016706 | -0.39598 | 0.131867 | -3.00291 | 0.003386 | 0.018154 | 1 |
| ENSG0000 response | Inflamed | DUSP21    | protein_cc chrX  | 44703249 | 44704130 | + | 882   | 2.238663 | 0.732697 | 0.28388  | 0.094554 | 3.002299 | 0.003392 | 0.018184 | 1 |
| ENSG0000 response | Inflamed | HAAO      | protein_cc chr2  | 42994229 | 43019733 | - | 2726  | 637.6396 | 0        | 0.48243  | 0.160706 | 3.001933 | 0.003396 | 0.018201 | 1 |
| ENSG0000 response | Inflamed | CTB-171A  | antisense chr19  | 45135500 | 45222031 | - | 1418  | 68.62768 | 0        | 0.461964 | 0.153897 | 3.001769 | 0.003397 | 0.018206 | 1 |
| ENSG0000 response | Inflamed | APBA3     | protein_cc chr19 | 3750817  | 3761697  | - | 5556  | 884.0716 | 0        | -0.25736 | 0.085746 | -3.00141 | 0.003401 | 0.018222 | 1 |
| ENSG0000 response | Inflamed | C1QB      | protein_cc chr1  | 22979255 | 22988031 | + | 1601  | 8024.821 | 0        | -0.43497 | 0.144929 | -3.00128 | 0.003402 | 0.018225 | 1 |
| ENSG0000 response | Inflamed | TRPC3     | protein_cc chr4  | 1.23E+08 | 1.23E+08 | - | 4358  | 14.59905 | 0.057279 | -0.56697 | 0.188945 | -3.00069 | 0.003408 | 0.018254 | 1 |
| ENSG0000 response | Inflamed | DNMBP     | protein_cc chr10 | 1.02E+08 | 1.02E+08 | - | 8634  | 3311.007 | 0        | 0.453804 | 0.151247 | 3.000411 | 0.003411 | 0.018265 | 1 |
| ENSG0000 response | Inflamed | SLC22A18  | protein_cc chr11 | 2920951  | 2946476  | + | 5316  | 4212.869 | 0        | 0.401604 | 0.133857 | 3.000242 | 0.003413 | 0.018271 | 1 |
| ENSG0000 response | Inflamed | RP11-117I | lincRNA chr1     | 53832340 | 53833917 | - | 850   | 6.422434 | 0.305489 | -0.61809 | 0.206043 | -2.99981 | 0.003417 | 0.018291 | 1 |
| ENSG0000 response | Inflamed | AP352     | protein_cc chr15 | 90373831 | 90437574 | - | 8146  | 1638.22  | 0        | 0.30327  | 0.101101 | 2.999683 | 0.003419 | 0.018294 | 1 |

|                   |          |           |                  |          |          |   |      |          |          |          |          |          |          |          |   |
|-------------------|----------|-----------|------------------|----------|----------|---|------|----------|----------|----------|----------|----------|----------|----------|---|
| ENSG0000 response | Inflamed | SND1      | protein_cc chr7  | 1.27E+08 | 1.28E+08 | + | 6500 | 9752.138 | 0        | -0.22624 | 0.075423 | -2.99959 | 0.00342  | 0.018296 | 1 |
| ENSG0000 response | Inflamed | EFNA2     | protein_cc chr19 | 1286153  | 1301430  | + | 2143 | 2412.045 | 0        | 0.657431 | 0.219184 | 2.999452 | 0.003421 | 0.018299 | 1 |
| ENSG0000 response | Inflamed | RP11-202A | lincRNA chr3     | 1.34E+08 | 1.34E+08 | - | 640  | 8.646778 | 0.112172 | 0.526472 | 0.17553  | 2.999332 | 0.003422 | 0.018302 | 1 |
| ENSG0000 response | Inflamed | MRPS36    | protein_cc chr5  | 68513587 | 68525956 | + | 1530 | 854.5656 | 0        | 0.367358 | 0.122483 | 2.999268 | 0.003423 | 0.018302 | 1 |
| ENSG0000 response | Inflamed | RNF185    | protein_cc chr22 | 31556168 | 31603005 | + | 3447 | 2261.432 | 0        | 0.212523 | 0.070861 | 2.999129 | 0.003424 | 0.018306 | 1 |
| ENSG0000 response | Inflamed | COL26A1   | polymorph chr7   | 1.01E+08 | 1.01E+08 | + | 3155 | 6.785203 | 0.181384 | -0.61026 | 0.203509 | -2.9987  | 0.003429 | 0.018326 | 1 |
| ENSG0000 response | Inflamed | RP11-386I | pseudoger chr1   | 78509067 | 78509832 | - | 766  | 11.02625 | 0.069212 | 0.479284 | 0.159854 | 2.99826  | 0.003433 | 0.018346 | 1 |
| ENSG0000 response | Inflamed | RP11-76E1 | lincRNA chr15    | 94406338 | 94421585 | + | 1572 | 8.083532 | 0.169451 | -0.56483 | 0.188397 | -2.99808 | 0.003435 | 0.018353 | 1 |
| ENSG0000 response | Inflamed | LINC00842 | lincRNA chr10    | 47011753 | 47174018 | - | 4893 | 19.80668 | 0.026253 | 0.592642 | 0.197716 | 2.997436 | 0.003442 | 0.018384 | 1 |
| ENSG0000 response | Inflamed | ZIK1      | protein_cc chr19 | 58089824 | 58105145 | + | 5257 | 88.40334 | 0.009547 | -0.47736 | 0.15926  | -2.99733 | 0.003443 | 0.018387 | 1 |
| ENSG0000 response | Inflamed | NUP188    | protein_cc chr9  | 1.32E+08 | 1.32E+08 | + | 8041 | 2680.742 | 0        | -0.31134 | 0.103874 | -2.99725 | 0.003444 | 0.018387 | 1 |
| ENSG0000 response | Inflamed | NQO2      | protein_cc chr6  | 2988221  | 3019996  | + | 2451 | 487.8544 | 0        | -0.35599 | 0.118778 | -2.99709 | 0.003446 | 0.018393 | 1 |
| ENSG0000 response | Inflamed | CXXC11    | protein_cc chr2  | 2.43E+08 | 2.43E+08 | + | 2606 | 11.4821  | 0.224344 | -0.69847 | 0.23307  | -2.99684 | 0.003448 | 0.018402 | 1 |
| ENSG0000 response | Inflamed | RP11-245C | lincRNA chr2     | 11018395 | 11025244 | + | 461  | 1.928401 | 0.608592 | 0.380798 | 0.127092 | 2.996224 | 0.003454 | 0.018433 | 1 |
| ENSG0000 response | Inflamed | CNR2      | protein_cc chr1  | 24197016 | 24285549 | - | 5468 | 138.8138 | 0.002387 | -0.853   | 0.284697 | -2.99615 | 0.003455 | 0.018433 | 1 |
| ENSG0000 response | Inflamed | CXCL9     | protein_cc chr4  | 76922428 | 76928641 | - | 2740 | 1442.196 | 0        | -1.05763 | 0.353059 | -2.99563 | 0.003461 | 0.018458 | 1 |
| ENSG0000 response | Inflamed | RP11-34P1 | processed_chr1   | 141474   | 173862   | - | 6195 | 49.04057 | 0.047733 | -0.73216 | 0.24445  | -2.99514 | 0.003466 | 0.018481 | 1 |
| ENSG0000 response | Inflamed | CTD-3065J | antisense chr8   | 1.45E+08 | 1.45E+08 | + | 1818 | 13.03341 | 0.042959 | -0.54115 | 0.180752 | -2.99391 | 0.003479 | 0.018546 | 1 |
| ENSG0000 response | Inflamed | XRCC6BP1  | protein_cc chr12 | 58335324 | 58351052 | + | 1373 | 244.6659 | 0        | 0.410314 | 0.137059 | 2.993708 | 0.003481 | 0.018554 | 1 |
| ENSG0000 response | Inflamed | ARNTL2    | protein_cc chr12 | 27485787 | 27576241 | + | 5002 | 572.4057 | 0        | -0.69068 | 0.230757 | -2.99309 | 0.003487 | 0.018585 | 1 |
| ENSG0000 response | Inflamed | MAMLD1    | protein_cc chrX  | 1.5E+08  | 1.5E+08  | + | 5958 | 178.3938 | 0.002387 | -0.51497 | 0.172057 | -2.99302 | 0.003488 | 0.018585 | 1 |
| ENSG0000 response | Inflamed | RAB8B     | protein_cc chr15 | 63481668 | 63559981 | + | 5200 | 681.7757 | 0        | -0.56565 | 0.188997 | -2.99293 | 0.003489 | 0.018586 | 1 |
| ENSG0000 response | Inflamed | ANKRD2    | protein_cc chr10 | 99332198 | 99343641 | + | 1509 | 1.980907 | 0.563246 | -0.43059 | 0.143874 | -2.99285 | 0.00349  | 0.018587 | 1 |
| ENSG0000 response | Inflamed | CTD-2530I | sense_intr chr11 | 75486949 | 75487974 | + | 842  | 1.083532 | 0.792363 | -0.43955 | 0.146875 | -2.99268 | 0.003491 | 0.018592 | 1 |
| ENSG0000 response | Inflamed | PPP1R17   | protein_cc chr7  | 31726329 | 31748069 | + | 2384 | 1.286396 | 0.789976 | -0.49377 | 0.164998 | -2.99256 | 0.003493 | 0.018593 | 1 |
| ENSG0000 response | Inflamed | IKBK      | protein_cc chrX  | 1.54E+08 | 1.54E+08 | + | 7462 | 283.4988 | 0        | -0.29798 | 0.099574 | -2.99253 | 0.003493 | 0.018593 | 1 |
| ENSG0000 response | Inflamed | HDAC1P1   | pseudoger chr10  | 95897505 | 95899257 | + | 1445 | 2.832936 | 0.424821 | 0.431975 | 0.144385 | 2.991839 | 0.0035   | 0.018628 | 1 |
| ENSG0000 response | Inflamed | UGDH      | protein_cc chr4  | 39500375 | 39529931 | - | 4045 | 3861.878 | 0        | 0.489604 | 0.163663 | 2.991538 | 0.003503 | 0.018641 | 1 |
| ENSG0000 response | Inflamed | SLC39A6   | protein_cc chr18 | 33688495 | 33709348 | - | 3682 | 814.3556 | 0        | -0.50007 | 0.167171 | -2.99135 | 0.003505 | 0.018647 | 1 |
| ENSG0000 response | Inflamed | RP4-756G  | antisense chr22  | 41605126 | 41613631 | - | 2500 | 17.44153 | 0.02864  | -0.47852 | 0.159989 | -2.99094 | 0.00351  | 0.018667 | 1 |
| ENSG0000 response | Inflamed | RSBN1L-A5 | lincRNA chr7     | 77286977 | 77325582 | - | 3100 | 237.1384 | 0        | 0.354694 | 0.118594 | 2.990815 | 0.003511 | 0.01867  | 1 |
| ENSG0000 response | Inflamed | FCHSD2    | protein_cc chr11 | 72547790 | 72853306 | - | 5188 | 1472.618 | 0        | -0.41684 | 0.139379 | -2.9907  | 0.003512 | 0.018673 | 1 |
| ENSG0000 response | Inflamed | PLGRKT    | protein_cc chr9  | 5357973  | 5437878  | - | 1493 | 843.9618 | 0        | 0.327423 | 0.109544 | 2.988963 | 0.003531 | 0.018766 | 1 |
| ENSG0000 response | Inflamed | RARB      | protein_cc chr3  | 25215823 | 25639423 | + | 3697 | 66.78043 | 0.009547 | -0.63    | 0.210782 | -2.98887 | 0.003532 | 0.018768 | 1 |
| ENSG0000 response | Inflamed | TNFRSF11I | protein_cc chr8  | 1.2E+08  | 1.2E+08  | - | 2827 | 528.9547 | 0        | -0.91185 | 0.30517  | -2.98802 | 0.003541 | 0.018812 | 1 |
| ENSG0000 response | Inflamed | DGKD      | protein_cc chr2  | 2.34E+08 | 2.34E+08 | + | 9441 | 4097.604 | 0        | 0.406601 | 0.136091 | 2.987708 | 0.003544 | 0.018826 | 1 |
| ENSG0000 response | Inflamed | PJA1      | protein_cc chrX  | 68380694 | 68385636 | - | 3117 | 505.9881 | 0        | -0.36239 | 0.121298 | -2.98763 | 0.003545 | 0.018826 | 1 |
| ENSG0000 response | Inflamed | RP1-167G  | lincRNA chr5     | 16373470 | 16440190 | - | 2120 | 1.124105 | 0.74463  | 0.352041 | 0.117846 | 2.987304 | 0.003548 | 0.018841 | 1 |
| ENSG0000 response | Inflamed | NPY4R     | protein_cc chr10 | 47083534 | 47088320 | + | 1956 | 425.8449 | 0.011933 | 0.98932  | 0.331193 | 2.987137 | 0.00355  | 0.018843 | 1 |
| ENSG0000 response | Inflamed | IGHJ2P    | IG_J_pseu chr14  | 1.06E+08 | 1.06E+08 | - | 60   | 8.384248 | 0.202864 | -0.68009 | 0.227672 | -2.98713 | 0.00355  | 0.018843 | 1 |

|                   |          |           |                  |          |          |   |       |          |          |          |          |          |          |          |   |
|-------------------|----------|-----------|------------------|----------|----------|---|-------|----------|----------|----------|----------|----------|----------|----------|---|
| ENSG0000 response | Inflamed | PNPLA4    | protein_cc chrX  | 7866288  | 7895780  | - | 3441  | 416.6611 | 0        | 0.274755 | 0.091986 | 2.986913 | 0.003552 | 0.018852 | 1 |
| ENSG0000 response | Inflamed | SQRDL     | protein_cc chr15 | 45923346 | 45983492 | + | 3088  | 4174.112 | 0        | 0.311145 | 0.104172 | 2.986843 | 0.003553 | 0.018852 | 1 |
| ENSG0000 response | Inflamed | FAM115D   | pseudoger chr7   | 1.43E+08 | 1.44E+08 | + | 2884  | 5.162291 | 0.24105  | -0.4329  | 0.144949 | -2.98658 | 0.003556 | 0.018863 | 1 |
| ENSG0000 response | Inflamed | KB-1448A5 | lincRNA chr8     | 97384093 | 97399666 | - | 1046  | 1.310263 | 0.689737 | 0.381693 | 0.127808 | 2.986453 | 0.003557 | 0.018866 | 1 |
| ENSG0000 response | Inflamed | IGSF3     | protein_cc chr1  | 1.17E+08 | 1.17E+08 | - | 7388  | 2266.685 | 0        | 0.541384 | 0.181319 | 2.985817 | 0.003564 | 0.018898 | 1 |
| ENSG0000 response | Inflamed | RASSF7    | protein_cc chr11 | 560404   | 564021   | + | 2492  | 3018.158 | 0        | 0.397729 | 0.13324  | 2.985052 | 0.003572 | 0.018938 | 1 |
| ENSG0000 response | Inflamed | KLKB1     | protein_cc chr4  | 1.87E+08 | 1.87E+08 | + | 2953  | 45.6253  | 0.02864  | 0.737651 | 0.24718  | 2.984264 | 0.003581 | 0.018977 | 1 |
| ENSG0000 response | Inflamed | AC006946  | lincRNA chr22    | 17561591 | 17562346 | + | 756   | 3.126492 | 0.369928 | -0.4637  | 0.155382 | -2.98423 | 0.003581 | 0.018977 | 1 |
| ENSG0000 response | Inflamed | RELB      | protein_cc chr19 | 45504688 | 45541452 | + | 3031  | 1684.542 | 0        | -0.34781 | 0.116563 | -2.98384 | 0.003585 | 0.018994 | 1 |
| ENSG0000 response | Inflamed | EML3      | protein_cc chr11 | 62369690 | 62380237 | - | 5490  | 2303.938 | 0        | -0.31046 | 0.104049 | -2.98378 | 0.003586 | 0.018994 | 1 |
| ENSG0000 response | Inflamed | ESRRB     | protein_cc chr14 | 76776957 | 76968178 | + | 4084  | 3.575179 | 0.319809 | -0.41594 | 0.139403 | -2.98373 | 0.003586 | 0.018994 | 1 |
| ENSG0000 response | Inflamed | CCR5      | protein_cc chr3  | 46411633 | 46417697 | + | 3883  | 479.3652 | 0        | -0.55734 | 0.186801 | -2.98358 | 0.003588 | 0.018999 | 1 |
| ENSG0000 response | Inflamed | ITIH3     | protein_cc chr3  | 52828784 | 52843025 | + | 5921  | 15.33413 | 0.088305 | -0.74022 | 0.248113 | -2.98339 | 0.00359  | 0.019005 | 1 |
| ENSG0000 response | Inflamed | FAM27A    | protein_cc chr9  | 45727107 | 45728274 | + | 616   | 17.40334 | 0.002387 | -0.39797 | 0.133398 | -2.98333 | 0.003591 | 0.019005 | 1 |
| ENSG0000 response | Inflamed | CTA-221G5 | lincRNA chr22    | 25608709 | 25609652 | + | 482   | 4.916468 | 0.264916 | 0.520725 | 0.174566 | 2.98296  | 0.003595 | 0.019022 | 1 |
| ENSG0000 response | Inflamed | CA5B      | protein_cc chrX  | 15706953 | 15805747 | + | 7735  | 193.8496 | 0        | -0.40645 | 0.136267 | -2.98277 | 0.003597 | 0.019029 | 1 |
| ENSG0000 response | Inflamed | MIR4645   | miRNA chr6       | 2854265  | 2854341  | - | 77    | 1.143198 | 0.682578 | -0.3558  | 0.119317 | -2.98201 | 0.003605 | 0.019069 | 1 |
| ENSG0000 response | Inflamed | COCH      | protein_cc chr14 | 31343720 | 31364271 | + | 3623  | 76.55131 | 0.009547 | -0.55471 | 0.186034 | -2.98176 | 0.003608 | 0.019079 | 1 |
| ENSG0000 response | Inflamed | FAM179A   | protein_cc chr2  | 29179477 | 29284239 | + | 19816 | 58.74702 | 0.004773 | -0.52384 | 0.17569  | -2.9816  | 0.003609 | 0.019085 | 1 |
| ENSG0000 response | Inflamed | GMIP      | protein_cc chr19 | 19740285 | 19754476 | - | 3740  | 2714.475 | 0        | -0.30436 | 0.102108 | -2.98081 | 0.003618 | 0.019126 | 1 |
| ENSG0000 response | Inflamed | SSBP3     | protein_cc chr1  | 54691105 | 54879152 | - | 5227  | 3341.365 | 0        | 0.279415 | 0.093761 | 2.98009  | 0.003626 | 0.019163 | 1 |
| ENSG0000 response | Inflamed | CCDC168   | protein_cc chr13 | 1.03E+08 | 1.03E+08 | - | 7359  | 0.918854 | 0.782816 | -0.35826 | 0.120225 | -2.9799  | 0.003628 | 0.019171 | 1 |
| ENSG0000 response | Inflamed | DHRS4     | protein_cc chr14 | 24422795 | 24438488 | + | 2305  | 688.5943 | 0        | 0.209168 | 0.070214 | 2.979023 | 0.003637 | 0.019213 | 1 |
| ENSG0000 response | Inflamed | RP11-296A | lincRNA chr1     | 51660767 | 51700768 | - | 2366  | 3.205251 | 0.322196 | -0.37298 | 0.125204 | -2.97902 | 0.003637 | 0.019213 | 1 |
| ENSG0000 response | Inflamed | MIER2     | protein_cc chr19 | 305575   | 344798   | - | 3738  | 838.5537 | 0        | -0.31424 | 0.105496 | -2.97868 | 0.003641 | 0.019229 | 1 |
| ENSG0000 response | Inflamed | TNS4      | protein_cc chr17 | 38632080 | 38657849 | - | 4847  | 1798.506 | 0        | -0.78192 | 0.262519 | -2.97854 | 0.003643 | 0.019231 | 1 |
| ENSG0000 response | Inflamed | CTD-2319I | lincRNA chr17    | 58156670 | 58166056 | + | 699   | 4.97852  | 0.205251 | -0.46723 | 0.156867 | -2.9785  | 0.003643 | 0.019231 | 1 |
| ENSG0000 response | Inflamed | DECR1     | protein_cc chr8  | 91013633 | 91064320 | + | 3507  | 2218.976 | 0        | 0.308643 | 0.103637 | 2.978122 | 0.003647 | 0.019249 | 1 |
| ENSG0000 response | Inflamed | BAIAP3    | protein_cc chr16 | 1383602  | 1399439  | + | 6143  | 314.6158 | 0        | 0.525617 | 0.176497 | 2.978052 | 0.003648 | 0.01925  | 1 |
| ENSG0000 response | Inflamed | SLC12A8   | protein_cc chr3  | 1.25E+08 | 1.25E+08 | - | 5728  | 710.3461 | 0        | 0.358728 | 0.120461 | 2.977972 | 0.003649 | 0.01925  | 1 |
| ENSG0000 response | Inflamed | SNORA14   | snoRNA chr10     | 6059017  | 6059157  | - | 141   | 1.193317 | 0.704057 | -0.4033  | 0.135455 | -2.9774  | 0.003655 | 0.019279 | 1 |
| ENSG0000 response | Inflamed | RP11-148C | antisense chr8   | 11415975 | 11417529 | - | 594   | 1.610979 | 0.73031  | -0.39701 | 0.133348 | -2.97729 | 0.003656 | 0.019282 | 1 |
| ENSG0000 response | Inflamed | FAM50B    | protein_cc chr6  | 3849620  | 3851551  | + | 1932  | 202.0048 | 0        | -0.30785 | 0.103402 | -2.97716 | 0.003658 | 0.019285 | 1 |
| ENSG0000 response | Inflamed | PKMP1     | pseudoger chr1   | 1.15E+08 | 1.15E+08 | + | 1523  | 4.367542 | 0.200477 | -0.43956 | 0.147653 | -2.977   | 0.003659 | 0.019291 | 1 |
| ENSG0000 response | Inflamed | EPCAM     | protein_cc chr2  | 47572297 | 47614740 | + | 2519  | 41508.31 | 0        | 0.706617 | 0.237366 | 2.976909 | 0.00366  | 0.019292 | 1 |
| ENSG0000 response | Inflamed | TMEM173   | protein_cc chr5  | 1.39E+08 | 1.39E+08 | - | 3850  | 3499.179 | 0        | -0.33762 | 0.113437 | -2.97632 | 0.003667 | 0.01932  | 1 |
| ENSG0000 response | Inflamed | FAM157A   | lincRNA chr3     | 1.98E+08 | 1.98E+08 | + | 2586  | 68.04773 | 0.033413 | -0.86084 | 0.289233 | -2.9763  | 0.003667 | 0.01932  | 1 |
| ENSG0000 response | Inflamed | RP11-420k | pseudoger chr19  | 21820776 | 21839102 | + | 1367  | 2.324582 | 0.639618 | 0.357056 | 0.119972 | 2.976164 | 0.003668 | 0.019324 | 1 |
| ENSG0000 response | Inflamed | RP11-125C | lincRNA chr4     | 1.28E+08 | 1.28E+08 | - | 1077  | 1.797136 | 0.799523 | -0.58798 | 0.197574 | -2.976   | 0.00367  | 0.019329 | 1 |
| ENSG0000 response | Inflamed | KIAA1161  | protein_cc chr9  | 34366668 | 34376851 | - | 6398  | 6686.465 | 0        | 0.529669 | 0.177996 | 2.975737 | 0.003673 | 0.019337 | 1 |

|                   |          |           |                  |          |          |   |       |          |          |          |          |          |          |          |   |
|-------------------|----------|-----------|------------------|----------|----------|---|-------|----------|----------|----------|----------|----------|----------|----------|---|
| ENSG0000 response | Inflamed | CAV2      | protein_cc chr7  | 1.16E+08 | 1.16E+08 | + | 6640  | 447.7637 | 0        | -0.47725 | 0.160383 | -2.97567 | 0.003674 | 0.019337 | 1 |
| ENSG0000 response | Inflamed | PTPLA     | protein_cc chr10 | 17631958 | 17659376 | - | 2175  | 35.67303 | 0.004773 | -0.46409 | 0.155962 | -2.97567 | 0.003674 | 0.019337 | 1 |
| ENSG0000 response | Inflamed | TMEM27    | protein_cc chrX  | 15645441 | 15683154 | - | 1578  | 8.847255 | 0.076372 | 0.432742 | 0.145466 | 2.974855 | 0.003683 | 0.01938  | 1 |
| ENSG0000 response | Inflamed | PSTPIP2   | protein_cc chr18 | 43563502 | 43652238 | - | 4120  | 378.6444 | 0        | -0.57442 | 0.193106 | -2.97461 | 0.003686 | 0.01939  | 1 |
| ENSG0000 response | Inflamed | TSPAN18   | protein_cc chr11 | 44748015 | 44953972 | + | 5871  | 824.1432 | 0        | -0.58685 | 0.197296 | -2.97447 | 0.003687 | 0.019394 | 1 |
| ENSG0000 response | Inflamed | CTNND1    | protein_cc chr11 | 57520715 | 57587018 | + | 8833  | 25133.65 | 0        | 0.437367 | 0.147056 | 2.974149 | 0.003691 | 0.019407 | 1 |
| ENSG0000 response | Inflamed | XKR5      | processed_chr8   | 6666038  | 6693166  | - | 5032  | 3.875895 | 0.360382 | -0.51201 | 0.172154 | -2.97411 | 0.003691 | 0.019407 | 1 |
| ENSG0000 response | Inflamed | STAU2-AS1 | lincRNA chr8     | 74332239 | 74353761 | + | 2279  | 2.73031  | 0.443914 | 0.436638 | 0.146816 | 2.974056 | 0.003692 | 0.019407 | 1 |
| ENSG0000 response | Inflamed | KCNJ6     | protein_cc chr21 | 38979678 | 39288749 | - | 19671 | 8.458234 | 0.138425 | 0.666084 | 0.223996 | 2.973639 | 0.003696 | 0.019427 | 1 |
| ENSG0000 response | Inflamed | RP5-968J1 | lincRNA chr20    | 1784662  | 1798252  | - | 346   | 1.782816 | 0.572792 | -0.37314 | 0.125506 | -2.97307 | 0.003703 | 0.019456 | 1 |
| ENSG0000 response | Inflamed | RP11-82L1 | lincRNA chr9     | 91624949 | 91625393 | - | 445   | 9.522673 | 0.260143 | -0.85176 | 0.286544 | -2.97253 | 0.003709 | 0.019484 | 1 |
| ENSG0000 response | Inflamed | RAET1E    | protein_cc chr6  | 1.5E+08  | 1.5E+08  | - | 3004  | 16.91169 | 0.045346 | -0.5384  | 0.181159 | -2.97199 | 0.003715 | 0.019512 | 1 |
| ENSG0000 response | Inflamed | RP11-24M  | processed_chr15  | 76030161 | 76055662 | + | 1085  | 0.942721 | 0.754177 | -0.30698 | 0.103308 | -2.97156 | 0.003719 | 0.019532 | 1 |
| ENSG0000 response | Inflamed | MPG       | protein_cc chr16 | 127006   | 135852   | + | 1661  | 1241.093 | 0        | -0.34282 | 0.115371 | -2.9715  | 0.00372  | 0.019532 | 1 |
| ENSG0000 response | Inflamed | C17orf72  | protein_cc chr17 | 62075711 | 62081664 | + | 4142  | 15.74702 | 0.052506 | -0.46866 | 0.15773  | -2.97125 | 0.003723 | 0.019542 | 1 |
| ENSG0000 response | Inflamed | CLECL1    | protein_cc chr12 | 9868456  | 9885895  | - | 1721  | 36.65155 | 0.004773 | -0.56693 | 0.190809 | -2.97121 | 0.003723 | 0.019542 | 1 |
| ENSG0000 response | Inflamed | HERC5     | protein_cc chr4  | 89378268 | 89427314 | + | 4766  | 184.6325 | 0        | -0.58783 | 0.197848 | -2.9711  | 0.003724 | 0.019544 | 1 |
| ENSG0000 response | Inflamed | RP11-320M | pseudoger chr14  | 32953304 | 32954006 | - | 703   | 5.472554 | 0.439141 | 0.513673 | 0.172923 | 2.970534 | 0.003731 | 0.019573 | 1 |
| ENSG0000 response | Inflamed | DNAJB1    | protein_cc chr19 | 14625582 | 14640582 | - | 3672  | 5596.573 | 0        | 0.212006 | 0.071386 | 2.969874 | 0.003738 | 0.019608 | 1 |
| ENSG0000 response | Inflamed | TRGV8     | TR_V_gene chr7   | 38369944 | 38370536 | - | 468   | 6.949881 | 0.119332 | -0.45404 | 0.152886 | -2.96977 | 0.003739 | 0.01961  | 1 |
| ENSG0000 response | Inflamed | HAVCR1    | protein_cc chr5  | 1.56E+08 | 1.56E+08 | - | 2151  | 78.06444 | 0.045346 | 0.859096 | 0.289292 | 2.969648 | 0.003741 | 0.019613 | 1 |
| ENSG0000 response | Inflamed | RP11-809C | lincRNA chr10    | 714400   | 715521   | + | 1122  | 12.35084 | 0.109785 | 0.562108 | 0.189297 | 2.96946  | 0.003743 | 0.01962  | 1 |
| ENSG0000 response | Inflamed | MIR146A   | lincRNA chr5     | 1.6E+08  | 1.6E+08  | + | 2301  | 200.6683 | 0.004773 | -0.91139 | 0.306936 | -2.96931 | 0.003744 | 0.019625 | 1 |
| ENSG0000 response | Inflamed | LINC01088 | antisense chr4   | 79892902 | 80229952 | + | 3995  | 8.100239 | 0.073986 | 0.510165 | 0.171842 | 2.968805 | 0.00375  | 0.019651 | 1 |
| ENSG0000 response | Inflamed | ERLEC1    | protein_cc chr2  | 54014181 | 54045956 | + | 2592  | 2852.461 | 0        | -0.42634 | 0.143618 | -2.96855 | 0.003753 | 0.019662 | 1 |
| ENSG0000 response | Inflamed | SSSCA1    | protein_cc chr11 | 65337901 | 65341413 | + | 2008  | 440.2267 | 0        | -0.29366 | 0.098927 | -2.96845 | 0.003754 | 0.019662 | 1 |
| ENSG0000 response | Inflamed | SHANK2    | protein_cc chr11 | 70313961 | 70963623 | - | 16428 | 522.5274 | 0        | 0.517336 | 0.174281 | 2.968406 | 0.003754 | 0.019662 | 1 |
| ENSG0000 response | Inflamed | PKIG      | protein_cc chr20 | 43160426 | 43252888 | + | 2496  | 1723.998 | 0        | -0.27945 | 0.094144 | -2.9683  | 0.003756 | 0.019664 | 1 |
| ENSG0000 response | Inflamed | CCNI2     | protein_cc chr5  | 1.32E+08 | 1.32E+08 | + | 2923  | 474.2196 | 0        | 0.455791 | 0.15356  | 2.968168 | 0.003757 | 0.019669 | 1 |
| ENSG0000 response | Inflamed | HLA-B     | protein_cc chr6  | 31321649 | 31324965 | - | 3012  | 102666.4 | 0        | -0.22422 | 0.075548 | -2.9679  | 0.00376  | 0.01968  | 1 |
| ENSG0000 response | Inflamed | TREM2     | protein_cc chr6  | 41126244 | 41130924 | - | 1095  | 78.63723 | 0.002387 | -0.6004  | 0.202314 | -2.96764 | 0.003763 | 0.019692 | 1 |
| ENSG0000 response | Inflamed | HSD17B14  | protein_cc chr19 | 49316274 | 49339935 | - | 1281  | 106.7924 | 0        | -0.4157  | 0.140086 | -2.96743 | 0.003765 | 0.0197   | 1 |
| ENSG0000 response | Inflamed | HIBCH     | protein_cc chr2  | 1.91E+08 | 1.91E+08 | - | 7438  | 923.2554 | 0        | 0.410322 | 0.138283 | 2.967262 | 0.003767 | 0.019706 | 1 |
| ENSG0000 response | Inflamed | RP11-73M  | lincRNA chr14    | 1.04E+08 | 1.04E+08 | + | 683   | 47.33413 | 0.002387 | 0.370742 | 0.124996 | 2.966027 | 0.003781 | 0.019775 | 1 |
| ENSG0000 response | Inflamed | CD1C      | protein_cc chr1  | 1.58E+08 | 1.58E+08 | + | 1435  | 148.2387 | 0        | -0.71399 | 0.240733 | -2.9659  | 0.003783 | 0.019777 | 1 |
| ENSG0000 response | Inflamed | FSIP1     | protein_cc chr15 | 39892232 | 40075031 | - | 2951  | 28.15752 | 0.019093 | 0.636916 | 0.214749 | 2.965858 | 0.003783 | 0.019777 | 1 |
| ENSG0000 response | Inflamed | FAM102A   | protein_cc chr9  | 1.31E+08 | 1.31E+08 | - | 6100  | 6807.721 | 0        | 0.368644 | 0.124321 | 2.965263 | 0.00379  | 0.019808 | 1 |
| ENSG0000 response | Inflamed | CABLES1   | protein_cc chr18 | 20714528 | 20840431 | + | 6654  | 775.7136 | 0        | 0.323743 | 0.109183 | 2.965151 | 0.003791 | 0.019811 | 1 |
| ENSG0000 response | Inflamed | DNAJC22   | protein_cc chr12 | 49740700 | 49751309 | + | 3477  | 893.6229 | 0        | 0.4874   | 0.164392 | 2.964865 | 0.003794 | 0.019823 | 1 |
| ENSG0000 response | Inflamed | C20orf112 | protein_cc chr20 | 31030862 | 31172876 | - | 9448  | 4288.737 | 0        | 0.387138 | 0.130579 | 2.964771 | 0.003795 | 0.019823 | 1 |

|                   |          |           |                    |          |          |   |       |          |          |          |          |          |          |          |   |
|-------------------|----------|-----------|--------------------|----------|----------|---|-------|----------|----------|----------|----------|----------|----------|----------|---|
| ENSG0000 response | Inflamed | TSPAN13   | protein_cc chr7    | 16793160 | 16824161 | + | 2224  | 3745.532 | 0        | 0.343762 | 0.11595  | 2.964748 | 0.003796 | 0.019823 | 1 |
| ENSG0000 response | Inflamed | RP11-2E11 | antisense chr7     | 1.3E+08  | 1.3E+08  | + | 623   | 3.221957 | 0.322196 | 0.445312 | 0.15021  | 2.964605 | 0.003797 | 0.019827 | 1 |
| ENSG0000 response | Inflamed | ARHGEF17  | protein_cc chr11   | 73019334 | 73080136 | + | 9539  | 1752.947 | 0        | -0.56294 | 0.189894 | -2.96447 | 0.003799 | 0.019831 | 1 |
| ENSG0000 response | Inflamed | RP11-557F | lincRNA chr6       | 1.35E+08 | 1.35E+08 | - | 1731  | 1.747017 | 0.570406 | -0.36157 | 0.121979 | -2.9642  | 0.003802 | 0.019843 | 1 |
| ENSG0000 response | Inflamed | RP1-29C1  | ε sense_intr chr22 | 50006305 | 50009364 | - | 2975  | 10.67064 | 0.085919 | -0.59909 | 0.202121 | -2.964   | 0.003804 | 0.019851 | 1 |
| ENSG0000 response | Inflamed | RP11-353M | lincRNA chr17      | 77893156 | 77899261 | + | 1877  | 25.36754 | 0.050119 | 0.664595 | 0.224296 | 2.963029 | 0.003815 | 0.019899 | 1 |
| ENSG0000 response | Inflamed | PTX3      | protein_cc chr3    | 1.57E+08 | 1.57E+08 | + | 1940  | 74.63723 | 0.004773 | -0.64391 | 0.217315 | -2.96302 | 0.003815 | 0.019899 | 1 |
| ENSG0000 response | Inflamed | TMEM104   | protein_cc chr17   | 72772622 | 72835918 | + | 4983  | 1427.37  | 0        | -0.26738 | 0.090238 | -2.96299 | 0.003816 | 0.019899 | 1 |
| ENSG0000 response | Inflamed | KCNQ3     | protein_cc chr8    | 1.33E+08 | 1.33E+08 | - | 12453 | 33.7494  | 0.045346 | -0.74773 | 0.252368 | -2.96284 | 0.003817 | 0.019905 | 1 |
| ENSG0000 response | Inflamed | AC092653  | pseudoger chr2     | 73927754 | 73928432 | - | 679   | 30.77566 | 0.054893 | 0.674104 | 0.227526 | 2.96275  | 0.003818 | 0.019906 | 1 |
| ENSG0000 response | Inflamed | SERPINE2  | protein_cc chr2    | 2.25E+08 | 2.25E+08 | - | 8891  | 1392.303 | 0        | -0.61147 | 0.206411 | -2.96237 | 0.003823 | 0.019924 | 1 |
| ENSG0000 response | Inflamed | GALR2     | protein_cc chr17   | 74070875 | 74073622 | + | 1364  | 5.556086 | 0.143198 | -0.45353 | 0.153136 | -2.96164 | 0.003831 | 0.019964 | 1 |
| ENSG0000 response | Inflamed | CTA-398F1 | lincRNA chr8       | 8314419  | 8318847  | - | 510   | 3.033413 | 0.386635 | 0.468328 | 0.158141 | 2.961455 | 0.003833 | 0.019971 | 1 |
| ENSG0000 response | Inflamed | AKNA      | protein_cc chr9    | 1.17E+08 | 1.17E+08 | - | 10601 | 5337.329 | 0        | -0.38877 | 0.131295 | -2.96103 | 0.003838 | 0.019991 | 1 |
| ENSG0000 response | Inflamed | SMARCD3   | protein_cc chr7    | 1.51E+08 | 1.51E+08 | - | 5198  | 413.7232 | 0        | -0.44114 | 0.148983 | -2.96098 | 0.003839 | 0.019991 | 1 |
| ENSG0000 response | Inflamed | PPARGC1B  | protein_cc chr5    | 1.49E+08 | 1.49E+08 | + | 12889 | 1901.635 | 0        | 0.573064 | 0.193559 | 2.960673 | 0.003842 | 0.020005 | 1 |
| ENSG0000 response | Inflamed | RP11-104E | antisense chr14    | 25064929 | 25126980 | + | 947   | 2.897375 | 0.713604 | -0.57058 | 0.192726 | -2.96056 | 0.003843 | 0.020008 | 1 |
| ENSG0000 response | Inflamed | COG1      | protein_cc chr17   | 71189129 | 71204646 | + | 5061  | 2020.234 | 0        | 0.246211 | 0.08317  | 2.96034  | 0.003846 | 0.020017 | 1 |
| ENSG0000 response | Inflamed | PEX7      | protein_cc chr6    | 1.37E+08 | 1.37E+08 | + | 1832  | 236.3866 | 0        | 0.276886 | 0.093541 | 2.960046 | 0.003849 | 0.020031 | 1 |
| ENSG0000 response | Inflamed | ACOX1     | protein_cc chr17   | 73937588 | 73975515 | - | 8543  | 5789.78  | 0        | 0.453114 | 0.153111 | 2.959379 | 0.003857 | 0.020067 | 1 |
| ENSG0000 response | Inflamed | CTD-2260  | antisense chr5     | 96140056 | 96141808 | + | 569   | 1.687351 | 0.620525 | 0.321262 | 0.108563 | 2.95922  | 0.003859 | 0.020072 | 1 |
| ENSG0000 response | Inflamed | RP11-671J | antisense chr14    | 35025980 | 35030504 | + | 1137  | 1.224344 | 0.711217 | 0.261589 | 0.088406 | 2.958963 | 0.003862 | 0.020084 | 1 |
| ENSG0000 response | Inflamed | COL10A1   | protein_cc chr6    | 1.16E+08 | 1.16E+08 | - | 3816  | 48.41527 | 0.367542 | -1.32725 | 0.448582 | -2.95877 | 0.003864 | 0.020091 | 1 |
| ENSG0000 response | Inflamed | TRDV2     | TR_V_gene chr14    | 22891362 | 22892033 | + | 520   | 1.823389 | 0.627685 | -0.29322 | 0.099123 | -2.95817 | 0.003871 | 0.020123 | 1 |
| ENSG0000 response | Inflamed | IGHV3-64  | IG_V_gene chr14    | 1.07E+08 | 1.07E+08 | - | 431   | 882.9284 | 0.002387 | -1.03336 | 0.349355 | -2.95791 | 0.003874 | 0.020134 | 1 |
| ENSG0000 response | Inflamed | SESN2     | protein_cc chr1    | 28586038 | 28609002 | + | 3453  | 2144.952 | 0        | 0.286727 | 0.096938 | 2.95785  | 0.003874 | 0.020134 | 1 |
| ENSG0000 response | Inflamed | PAQR8     | protein_cc chr6    | 52226219 | 52272575 | + | 5057  | 5828.477 | 0        | 0.53733  | 0.181689 | 2.957413 | 0.00388  | 0.020157 | 1 |
| ENSG0000 response | Inflamed | SMG9      | protein_cc chr19   | 44235301 | 44259142 | - | 4770  | 1472.1   | 0        | -0.22804 | 0.077111 | -2.95731 | 0.003881 | 0.020159 | 1 |
| ENSG0000 response | Inflamed | FNIP2     | protein_cc chr4    | 1.6E+08  | 1.6E+08  | + | 10868 | 2382.554 | 0        | 0.557671 | 0.188598 | 2.956925 | 0.003885 | 0.020178 | 1 |
| ENSG0000 response | Inflamed | RP11-526  | lincRNA chr4       | 1.5E+08  | 1.51E+08 | - | 2537  | 9.257757 | 0.243437 | 0.65849  | 0.222727 | 2.956493 | 0.00389  | 0.0202   | 1 |
| ENSG0000 response | Inflamed | AMDHD1    | protein_cc chr12   | 96337071 | 96362370 | + | 2562  | 8.093079 | 0.114558 | -0.51794 | 0.175215 | -2.95605 | 0.003895 | 0.020223 | 1 |
| ENSG0000 response | Inflamed | SSR3      | protein_cc chr3    | 1.56E+08 | 1.56E+08 | - | 4627  | 5107.945 | 0        | -0.34357 | 0.116258 | -2.9552  | 0.003905 | 0.020267 | 1 |
| ENSG0000 response | Inflamed | CFLAR-AS1 | antisense chr2     | 2.02E+08 | 2.02E+08 | - | 3166  | 5.704057 | 0.348449 | 0.6243   | 0.211256 | 2.955182 | 0.003905 | 0.020267 | 1 |
| ENSG0000 response | Inflamed | ZFY-AS1   | antisense chrY     | 2834885  | 2870667  | - | 796   | 1.823389 | 0.630072 | 0.306698 | 0.103788 | 2.955053 | 0.003907 | 0.020271 | 1 |
| ENSG0000 response | Inflamed | IFI27L2   | protein_cc chr14   | 94594116 | 94596590 | - | 1662  | 500.1575 | 0        | -0.42683 | 0.144469 | -2.95444 | 0.003914 | 0.0203   | 1 |
| ENSG0000 response | Inflamed | DYX1C1    | protein_cc chr15   | 55702723 | 55800432 | - | 2917  | 4.601432 | 0.217184 | -0.47176 | 0.159679 | -2.95443 | 0.003914 | 0.0203   | 1 |
| ENSG0000 response | Inflamed | TGFBR3L   | protein_cc chr19   | 7981030  | 7983982  | + | 1516  | 8.546539 | 0.040573 | -0.44017 | 0.149018 | -2.95378 | 0.003922 | 0.020335 | 1 |
| ENSG0000 response | Inflamed | GPBP1L1   | protein_cc chr1    | 46092976 | 46153785 | - | 7433  | 5520.988 | 0        | 0.366687 | 0.124161 | 2.953311 | 0.003927 | 0.02036  | 1 |
| ENSG0000 response | Inflamed | PBLD      | protein_cc chr10   | 70042417 | 70092806 | - | 5172  | 1321.263 | 0        | 0.743644 | 0.251816 | 2.953127 | 0.003929 | 0.020367 | 1 |
| ENSG0000 response | Inflamed | AC005831  | pseudoger chr12    | 3797876  | 3799650  | - | 1774  | 1.059666 | 0.78043  | 0.447832 | 0.151669 | 2.952682 | 0.003935 | 0.02039  | 1 |



|                   |          |           |                  |          |          |   |       |          |          |          |          |          |          |          |   |
|-------------------|----------|-----------|------------------|----------|----------|---|-------|----------|----------|----------|----------|----------|----------|----------|---|
| ENSG0000 response | Inflamed | CDYL2     | protein_cc chr16 | 80631803 | 80838226 | - | 8557  | 523.3317 | 0        | -0.57883 | 0.196046 | -2.9525  | 0.003937 | 0.020397 | 1 |
| ENSG0000 response | Inflamed | DDR2      | protein_cc chr1  | 1.63E+08 | 1.63E+08 | + | 10730 | 1501.692 | 0        | -0.6937  | 0.235003 | -2.95186 | 0.003944 | 0.020432 | 1 |
| ENSG0000 response | Inflamed | PTN       | protein_cc chr7  | 1.37E+08 | 1.37E+08 | - | 1713  | 152.3198 | 0        | 0.63747  | 0.21597  | 2.951655 | 0.003947 | 0.02044  | 1 |
| ENSG0000 response | Inflamed | UBTF6     | pseudoger chr2   | 98253060 | 98254266 | - | 1207  | 3.372315 | 0.398568 | -0.48459 | 0.164182 | -2.95152 | 0.003948 | 0.020445 | 1 |
| ENSG0000 response | Inflamed | RP1-240K6 | processed_chr14  | 73929129 | 73943880 | + | 680   | 11.76611 | 0.066826 | 0.493318 | 0.16716  | 2.951168 | 0.003952 | 0.020454 | 1 |
| ENSG0000 response | Inflamed | RP11-91J1 | antisense chr8   | 400714   | 401343   | - | 630   | 7.317422 | 0.136038 | -0.49864 | 0.168963 | -2.95116 | 0.003952 | 0.020454 | 1 |
| ENSG0000 response | Inflamed | RP11-484L | antisense chr11  | 43350298 | 43380846 | - | 787   | 2.73031  | 0.424821 | 0.395341 | 0.133961 | 2.951158 | 0.003952 | 0.020454 | 1 |
| ENSG0000 response | Inflamed | CD84      | protein_cc chr1  | 1.61E+08 | 1.61E+08 | - | 9255  | 790.8115 | 0        | -0.63563 | 0.215404 | -2.95087 | 0.003956 | 0.020468 | 1 |
| ENSG0000 response | Inflamed | MRPS25    | protein_cc chr3  | 15083967 | 15106842 | - | 5383  | 2032.582 | 0        | 0.27827  | 0.094328 | 2.950014 | 0.003966 | 0.020516 | 1 |
| ENSG0000 response | Inflamed | RP11-73M  | antisense chr1   | 32037186 | 32041174 | - | 591   | 94.15274 | 0.004773 | 0.650983 | 0.220712 | 2.949473 | 0.003972 | 0.020545 | 1 |
| ENSG0000 response | Inflamed | NHLRC4    | protein_cc chr16 | 616996   | 619495   | + | 2105  | 50.55609 | 0.004773 | -0.44202 | 0.149868 | -2.9494  | 0.003973 | 0.020545 | 1 |
| ENSG0000 response | Inflamed | RP11-797A | lincRNA chr15    | 77334178 | 77335533 | - | 1356  | 40.75418 | 0.004773 | 0.502952 | 0.170562 | 2.948786 | 0.00398  | 0.020575 | 1 |
| ENSG0000 response | Inflamed | ICA1      | protein_cc chr7  | 8152814  | 8302317  | - | 4891  | 1154.675 | 0        | 0.366908 | 0.124427 | 2.948781 | 0.00398  | 0.020575 | 1 |
| ENSG0000 response | Inflamed | PKD1P5    | pseudoger chr16  | 18458147 | 18495797 | - | 10670 | 175.6086 | 0.02148  | 0.691815 | 0.234663 | 2.948119 | 0.003988 | 0.020611 | 1 |
| ENSG0000 response | Inflamed | MAGI1     | protein_cc chr3  | 65339200 | 66024509 | - | 11647 | 1226.033 | 0        | 0.496613 | 0.168471 | 2.947776 | 0.003992 | 0.020625 | 1 |
| ENSG0000 response | Inflamed | CTA-217C2 | lincRNA chr22    | 45528901 | 45559662 | - | 2263  | 223.2601 | 0        | -0.27184 | 0.09222  | -2.94772 | 0.003993 | 0.020625 | 1 |
| ENSG0000 response | Inflamed | RAPGEF4   | protein_cc chr2  | 1.74E+08 | 1.74E+08 | + | 7161  | 120.9356 | 0.004773 | -0.63921 | 0.216851 | -2.94769 | 0.003993 | 0.020625 | 1 |
| ENSG0000 response | Inflamed | SSR4P1    | pseudoger chr21  | 46491648 | 46494080 | - | 967   | 15.87112 | 0.00716  | -0.39028 | 0.132409 | -2.94757 | 0.003995 | 0.020629 | 1 |
| ENSG0000 response | Inflamed | SNX32     | protein_cc chr11 | 65601112 | 65624367 | + | 3966  | 36.38186 | 0.01432  | 0.610194 | 0.207028 | 2.947399 | 0.003997 | 0.020635 | 1 |
| ENSG0000 response | Inflamed | RP11-304L | sense_ove chr16  | 2141437  | 2145426  | + | 683   | 232.8711 | 0        | 0.496463 | 0.168447 | 2.947293 | 0.003998 | 0.020638 | 1 |
| ENSG0000 response | Inflamed | RPS4XP8   | pseudoger chr6   | 1.55E+08 | 1.55E+08 | + | 771   | 1.362768 | 0.680191 | 0.345926 | 0.117405 | 2.946433 | 0.004008 | 0.020686 | 1 |
| ENSG0000 response | Inflamed | PIIB      | protein_cc chr15 | 64448011 | 64455404 | - | 1911  | 10864.84 | 0        | -0.32311 | 0.109667 | -2.94629 | 0.00401  | 0.020691 | 1 |
| ENSG0000 response | Inflamed | ZNF428    | protein_cc chr19 | 44111371 | 44124026 | - | 1803  | 556.5585 | 0        | -0.23843 | 0.080932 | -2.94599 | 0.004014 | 0.020706 | 1 |
| ENSG0000 response | Inflamed | C17orf103 | protein_cc chr17 | 21142183 | 21156722 | - | 4930  | 880.9189 | 0        | -0.41512 | 0.140918 | -2.94585 | 0.004015 | 0.02071  | 1 |
| ENSG0000 response | Inflamed | NICN1     | protein_cc chr3  | 49460379 | 49466759 | - | 2929  | 593.3246 | 0        | -0.25994 | 0.088244 | -2.94572 | 0.004017 | 0.020714 | 1 |
| ENSG0000 response | Inflamed | GOLGA7B   | protein_cc chr10 | 99609996 | 99631337 | + | 3409  | 153.9189 | 0        | 0.502441 | 0.17057  | 2.945656 | 0.004017 | 0.020714 | 1 |
| ENSG0000 response | Inflamed | CRISPLD2  | protein_cc chr16 | 84853590 | 84954374 | + | 7963  | 3171.647 | 0        | -0.56257 | 0.191025 | -2.94501 | 0.004025 | 0.020749 | 1 |
| ENSG0000 response | Inflamed | RNA5SP75  | rRNA chr1        | 2.05E+08 | 2.05E+08 | - | 111   | 1.558473 | 0.632458 | -0.42942 | 0.14582  | -2.94485 | 0.004027 | 0.020756 | 1 |
| ENSG0000 response | Inflamed | CCR12P    | pseudoger chr13  | 1E+08    | 1E+08    | - | 998   | 3.541766 | 0.553699 | -0.52541 | 0.178425 | -2.9447  | 0.004029 | 0.02076  | 1 |
| ENSG0000 response | Inflamed | AD000671  | protein_cc chr19 | 36230153 | 36236333 | - | 1925  | 3.522673 | 0.279236 | -0.41404 | 0.140644 | -2.94392 | 0.004038 | 0.020803 | 1 |
| ENSG0000 response | Inflamed | SDIM1     | protein_cc chr6  | 1.66E+08 | 1.66E+08 | - | 2396  | 1.501193 | 0.694511 | -0.44062 | 0.149672 | -2.94388 | 0.004039 | 0.020803 | 1 |
| ENSG0000 response | Inflamed | THNSL2    | protein_cc chr2  | 88469835 | 88486146 | + | 6401  | 662.4368 | 0        | 0.380403 | 0.129221 | 2.943809 | 0.00404  | 0.020803 | 1 |
| ENSG0000 response | Inflamed | GPX8      | protein_cc chr5  | 54455946 | 54462899 | + | 3868  | 374.8544 | 0        | -0.5255  | 0.178523 | -2.94362 | 0.004042 | 0.020808 | 1 |
| ENSG0000 response | Inflamed | IGLV2-18  | IG_V_gene chr22  | 23077095 | 23077584 | + | 374   | 1372.508 | 0        | -0.90358 | 0.306964 | -2.9436  | 0.004042 | 0.020808 | 1 |
| ENSG0000 response | Inflamed | LATS2     | protein_cc chr13 | 21547171 | 21635686 | - | 5739  | 940.2816 | 0        | -0.53123 | 0.180482 | -2.94338 | 0.004045 | 0.020818 | 1 |
| ENSG0000 response | Inflamed | FNDC9     | protein_cc chr5  | 1.57E+08 | 1.57E+08 | - | 2285  | 2.322196 | 0.529833 | -0.46142 | 0.156786 | -2.94299 | 0.004049 | 0.020837 | 1 |
| ENSG0000 response | Inflamed | STRIP2    | protein_cc chr7  | 1.29E+08 | 1.29E+08 | + | 5876  | 388.9857 | 0.002387 | -0.83861 | 0.284959 | -2.94293 | 0.00405  | 0.020837 | 1 |
| ENSG0000 response | Inflamed | TRPV1     | protein_cc chr17 | 3468738  | 3500392  | - | 4995  | 18.09308 | 0.054893 | 0.543402 | 0.18467  | 2.942555 | 0.004055 | 0.020856 | 1 |
| ENSG0000 response | Inflamed | RP4-668J2 | antisense chr6   | 1384025  | 1385301  | - | 1277  | 13.78759 | 0.026253 | -0.55982 | 0.190262 | -2.94235 | 0.004057 | 0.020862 | 1 |
| ENSG0000 response | Inflamed | RP3-337H2 | antisense chr6   | 43529609 | 43530156 | + | 548   | 1.77327  | 0.529833 | 0.346088 | 0.117624 | 2.942323 | 0.004057 | 0.020862 | 1 |

|                   |          |           |                  |          |          |   |       |          |          |          |          |          |          |          |   |
|-------------------|----------|-----------|------------------|----------|----------|---|-------|----------|----------|----------|----------|----------|----------|----------|---|
| ENSG0000 response | Inflamed | ANXA10    | protein_cc chr4  | 1.69E+08 | 1.69E+08 | + | 1812  | 114.7494 | 0.367542 | -1.51274 | 0.514214 | -2.94184 | 0.004063 | 0.020888 | 1 |
| ENSG0000 response | Inflamed | STX19     | protein_cc chr3  | 93733213 | 93747454 | - | 1158  | 283.3484 | 0.004773 | 0.740945 | 0.251896 | 2.941473 | 0.004068 | 0.020907 | 1 |
| ENSG0000 response | Inflamed | MT-ND6    | protein_cc chrM  | 14149    | 14673    | - | 525   | 5315.652 | 0        | 0.512441 | 0.17422  | 2.941348 | 0.004069 | 0.020907 | 1 |
| ENSG0000 response | Inflamed | CEP170    | protein_cc chr1  | 2.43E+08 | 2.43E+08 | - | 10939 | 360.2745 | 0        | -0.66748 | 0.226931 | -2.94134 | 0.004069 | 0.020907 | 1 |
| ENSG0000 response | Inflamed | KLHL21    | protein_cc chr1  | 6650784  | 6674667  | - | 6670  | 1870.699 | 0        | -0.36465 | 0.123978 | -2.94121 | 0.004071 | 0.020908 | 1 |
| ENSG0000 response | Inflamed | RP11-44N  | sense_intr chr8  | 1.24E+08 | 1.24E+08 | + | 1018  | 2.183771 | 0.49642  | -0.40279 | 0.136949 | -2.94117 | 0.004071 | 0.020908 | 1 |
| ENSG0000 response | Inflamed | KCNG3     | protein_cc chr2  | 42669157 | 42721237 | - | 3824  | 28.18377 | 0.040573 | 0.612026 | 0.208093 | 2.941119 | 0.004072 | 0.020908 | 1 |
| ENSG0000 response | Inflamed | CTD-2008F | lincRNA chr17    | 26559616 | 26562307 | - | 2692  | 12.32936 | 0.174224 | 0.613027 | 0.208439 | 2.941035 | 0.004073 | 0.02091  | 1 |
| ENSG0000 response | Inflamed | NCDN      | protein_cc chr1  | 36023074 | 36032875 | + | 4917  | 1087.31  | 0        | -0.34282 | 0.116568 | -2.94097 | 0.004074 | 0.02091  | 1 |
| ENSG0000 response | Inflamed | RP5-1074L | antisense chr1   | 1.11E+08 | 1.11E+08 | - | 2611  | 12.60143 | 0.011933 | -0.29061 | 0.09882  | -2.94079 | 0.004076 | 0.020914 | 1 |
| ENSG0000 response | Inflamed | LCNL1     | protein_cc chr9  | 1.4E+08  | 1.4E+08  | + | 4052  | 57.88067 | 0.109785 | -1.09373 | 0.37192  | -2.94077 | 0.004076 | 0.020914 | 1 |
| ENSG0000 response | Inflamed | TSHZ2     | protein_cc chr20 | 51588946 | 52111869 | + | 12582 | 227.9236 | 0.004773 | -0.6405  | 0.217842 | -2.94023 | 0.004083 | 0.020943 | 1 |
| ENSG0000 response | Inflamed | MLXIPL    | protein_cc chr7  | 73007524 | 73038873 | - | 4815  | 344.7351 | 0.002387 | 0.793998 | 0.270074 | 2.939926 | 0.004086 | 0.020955 | 1 |
| ENSG0000 response | Inflamed | ZCCHC12   | protein_cc chrX  | 1.18E+08 | 1.18E+08 | + | 2231  | 6.288783 | 0.224344 | -0.64811 | 0.220453 | -2.93991 | 0.004087 | 0.020955 | 1 |
| ENSG0000 response | Inflamed | RP11-474E | antisense chr12  | 1.06E+08 | 1.06E+08 | - | 549   | 1.272076 | 0.73031  | 0.399538 | 0.135945 | 2.938974 | 0.004098 | 0.021009 | 1 |
| ENSG0000 response | Inflamed | ELMO2     | protein_cc chr20 | 44994688 | 45061704 | - | 6714  | 1502.647 | 0        | -0.29952 | 0.101932 | -2.93843 | 0.004105 | 0.021039 | 1 |
| ENSG0000 response | Inflamed | CTD-3162I | pseudoger chr19  | 36912438 | 36913436 | + | 999   | 1.257757 | 0.720764 | -0.31538 | 0.107338 | -2.9382  | 0.004107 | 0.021049 | 1 |
| ENSG0000 response | Inflamed | HNMT      | protein_cc chr2  | 1.39E+08 | 1.39E+08 | + | 4752  | 977.3532 | 0        | 0.348829 | 0.118735 | 2.937889 | 0.004111 | 0.021064 | 1 |
| ENSG0000 response | Inflamed | RP11-398k | antisense chr6   | 73972938 | 74011124 | + | 6660  | 50.72315 | 0.009547 | -0.5442  | 0.185281 | -2.93714 | 0.00412  | 0.021103 | 1 |
| ENSG0000 response | Inflamed | RP11-400M | lincRNA chr1     | 2.22E+08 | 2.22E+08 | - | 562   | 1.443914 | 0.794749 | -0.54523 | 0.185633 | -2.93713 | 0.00412  | 0.021103 | 1 |
| ENSG0000 response | Inflamed | KCNJ10    | protein_cc chr1  | 1.6E+08  | 1.6E+08  | - | 5293  | 116.1981 | 0.016706 | -0.8424  | 0.286819 | -2.93705 | 0.004121 | 0.021104 | 1 |
| ENSG0000 response | Inflamed | CTSG      | protein_cc chr14 | 25042728 | 25045466 | - | 1374  | 337.9761 | 0.002387 | -0.82215 | 0.279941 | -2.93688 | 0.004123 | 0.021111 | 1 |
| ENSG0000 response | Inflamed | HES6      | protein_cc chr2  | 2.39E+08 | 2.39E+08 | - | 2037  | 877.9284 | 0        | 0.432765 | 0.147359 | 2.936798 | 0.004124 | 0.021112 | 1 |
| ENSG0000 response | Inflamed | PRSS33    | protein_cc chr16 | 2833954  | 2837949  | - | 2112  | 52.52506 | 0.019093 | -0.76343 | 0.259993 | -2.93636 | 0.00413  | 0.02113  | 1 |
| ENSG0000 response | Inflamed | DGAT2     | protein_cc chr11 | 75470557 | 75512579 | + | 7904  | 420.8926 | 0        | -0.54638 | 0.186073 | -2.93634 | 0.00413  | 0.02113  | 1 |
| ENSG0000 response | Inflamed | DDX10P1   | pseudoger chr10  | 31207941 | 31210164 | - | 1933  | 1.350835 | 0.673031 | -0.35605 | 0.121257 | -2.93631 | 0.00413  | 0.02113  | 1 |
| ENSG0000 response | Inflamed | CTA-246H  | pseudoger chr22  | 25745510 | 25746289 | - | 780   | 26.39379 | 0.040573 | 0.567967 | 0.193452 | 2.935963 | 0.004135 | 0.021147 | 1 |
| ENSG0000 response | Inflamed | PAPPA     | protein_cc chr9  | 1.19E+08 | 1.19E+08 | + | 11573 | 523.8616 | 0.002387 | -0.73818 | 0.251433 | -2.9359  | 0.004135 | 0.021147 | 1 |
| ENSG0000 response | Inflamed | GLI3      | protein_cc chr7  | 42000548 | 42277469 | - | 9239  | 463.4916 | 0        | -0.74142 | 0.252581 | -2.93539 | 0.004142 | 0.02117  | 1 |
| ENSG0000 response | Inflamed | CTD-2377I | lincRNA chr17    | 46760729 | 46781844 | + | 618   | 274.0072 | 0.016706 | 0.723726 | 0.246554 | 2.93536  | 0.004142 | 0.02117  | 1 |
| ENSG0000 response | Inflamed | TRBV3-1   | TR_V_gene chr7   | 1.42E+08 | 1.42E+08 | + | 391   | 20.11933 | 0.019093 | -0.5515  | 0.187882 | -2.93535 | 0.004142 | 0.02117  | 1 |
| ENSG0000 response | Inflamed | RP11-168A | pseudoger chr5   | 79315432 | 79315743 | + | 312   | 1.749403 | 0.572792 | -0.33318 | 0.113511 | -2.93524 | 0.004143 | 0.021173 | 1 |
| ENSG0000 response | Inflamed | RP11-513M | antisense chr9   | 19375449 | 19375994 | + | 546   | 21.08115 | 0.019093 | 0.476993 | 0.162525 | 2.934883 | 0.004148 | 0.021191 | 1 |
| ENSG0000 response | Inflamed | RP11-325F | lincRNA chr7     | 1.05E+08 | 1.05E+08 | - | 640   | 136.6372 | 0.004773 | 0.739055 | 0.251872 | 2.93425  | 0.004156 | 0.021226 | 1 |
| ENSG0000 response | Inflamed | PPP1R36   | protein_cc chr14 | 65016620 | 65056098 | + | 3093  | 117.1432 | 0        | 0.44566  | 0.151947 | 2.932985 | 0.004171 | 0.021298 | 1 |
| ENSG0000 response | Inflamed | CBR3      | protein_cc chr21 | 37507210 | 37518864 | + | 1169  | 142.821  | 0        | -0.45468 | 0.155026 | -2.93293 | 0.004172 | 0.021298 | 1 |
| ENSG0000 response | Inflamed | RP11-207C | antisense chr9   | 5719021  | 5720244  | - | 543   | 1.252983 | 0.677804 | 0.288382 | 0.098326 | 2.932913 | 0.004172 | 0.021298 | 1 |
| ENSG0000 response | Inflamed | GULOP     | pseudoger chr8   | 27417791 | 27446590 | + | 748   | 3.119332 | 0.494033 | 0.404233 | 0.137849 | 2.932426 | 0.004178 | 0.021321 | 1 |
| ENSG0000 response | Inflamed | RP11-673E | pseudoger chr4   | 1.45E+08 | 1.45E+08 | - | 540   | 9.505967 | 0.062053 | -0.47515 | 0.162035 | -2.93242 | 0.004178 | 0.021321 | 1 |
| ENSG0000 response | Inflamed | AP000640  | antisense chr11  | 59436785 | 59443514 | + | 914   | 1.178998 | 0.720764 | -0.31113 | 0.106109 | -2.93215 | 0.004182 | 0.021333 | 1 |

|                   |          |           |                  |          |          |   |       |          |          |          |          |          |          |          |   |
|-------------------|----------|-----------|------------------|----------|----------|---|-------|----------|----------|----------|----------|----------|----------|----------|---|
| ENSG0000 response | Inflamed | ADAM1A    | pseudoger chr12  | 1.12E+08 | 1.12E+08 | + | 2976  | 267.3604 | 0        | 0.719374 | 0.245345 | 2.932093 | 0.004182 | 0.021333 | 1 |
| ENSG0000 response | Inflamed | BST1      | protein_cc chr4  | 15704573 | 15739936 | + | 2980  | 220.685  | 0        | -0.46157 | 0.157454 | -2.93146 | 0.00419  | 0.021369 | 1 |
| ENSG0000 response | Inflamed | IL1R1     | protein_cc chr2  | 1.03E+08 | 1.03E+08 | + | 7083  | 3582.11  | 0        | -0.59363 | 0.20253  | -2.93108 | 0.004195 | 0.021389 | 1 |
| ENSG0000 response | Inflamed | PROM2     | protein_cc chr2  | 95940201 | 95957056 | + | 6063  | 2546.945 | 0        | 0.586688 | 0.200297 | 2.929082 | 0.00422  | 0.021505 | 1 |
| ENSG0000 response | Inflamed | RP11-792L | lincRNA chr4     | 79567057 | 79603853 | + | 2951  | 26.78759 | 0.00716  | -0.50746 | 0.17325  | -2.92904 | 0.00422  | 0.021505 | 1 |
| ENSG0000 response | Inflamed | ZNF275    | protein_cc chrX  | 1.53E+08 | 1.53E+08 | + | 8148  | 1484.933 | 0        | -0.40728 | 0.139052 | -2.92902 | 0.00422  | 0.021505 | 1 |
| ENSG0000 response | Inflamed | CCDC58    | protein_cc chr3  | 1.22E+08 | 1.22E+08 | - | 1746  | 266.4057 | 0        | 0.353289 | 0.120618 | 2.928998 | 0.004221 | 0.021505 | 1 |
| ENSG0000 response | Inflamed | FARP2     | protein_cc chr2  | 2.42E+08 | 2.42E+08 | + | 14413 | 3968.358 | 0        | 0.380106 | 0.129788 | 2.928654 | 0.004225 | 0.021522 | 1 |
| ENSG0000 response | Inflamed | SAT1      | protein_cc chrX  | 23801290 | 23804343 | + | 2498  | 12978.57 | 0        | -0.41776 | 0.142662 | -2.92833 | 0.004229 | 0.021539 | 1 |
| ENSG0000 response | Inflamed | THRB-IT1  | sense_intr chr3  | 24496627 | 24500925 | - | 1754  | 1.155131 | 0.742243 | 0.312942 | 0.106871 | 2.928216 | 0.004231 | 0.021542 | 1 |
| ENSG0000 response | Inflamed | SNTG2     | protein_cc chr2  | 946554   | 1371385  | + | 4469  | 12.51313 | 0.050119 | -0.49401 | 0.168717 | -2.92804 | 0.004233 | 0.021549 | 1 |
| ENSG0000 response | Inflamed | HPD       | protein_cc chr12 | 1.22E+08 | 1.22E+08 | - | 2232  | 11.40573 | 0.081146 | -0.61713 | 0.210798 | -2.9276  | 0.004238 | 0.021573 | 1 |
| ENSG0000 response | Inflamed | PSMB9     | protein_cc chr6  | 32811913 | 32827362 | + | 3072  | 2134.874 | 0        | -0.40333 | 0.137795 | -2.92703 | 0.004245 | 0.021605 | 1 |
| ENSG0000 response | Inflamed | CALD1     | protein_cc chr7  | 1.34E+08 | 1.35E+08 | + | 9930  | 3874.926 | 0        | -0.60762 | 0.2076   | -2.9269  | 0.004247 | 0.021609 | 1 |
| ENSG0000 response | Inflamed | RP11-466A | sense_intr chr17 | 30856026 | 30857067 | - | 475   | 0.947494 | 0.754177 | 0.314993 | 0.107625 | 2.926765 | 0.004249 | 0.021611 | 1 |
| ENSG0000 response | Inflamed | LPCAT3    | protein_cc chr12 | 7085348  | 7125814  | - | 4724  | 3547.103 | 0        | 0.298794 | 0.102091 | 2.926745 | 0.004249 | 0.021611 | 1 |
| ENSG0000 response | Inflamed | PLCXD3    | protein_cc chr5  | 41307056 | 41510730 | - | 7731  | 9.832936 | 0.152745 | 0.733091 | 0.250492 | 2.926608 | 0.004251 | 0.021615 | 1 |
| ENSG0000 response | Inflamed | IKZF3     | protein_cc chr17 | 37921198 | 38020441 | - | 2778  | 422.0811 | 0.011933 | -0.73124 | 0.249882 | -2.92636 | 0.004254 | 0.021627 | 1 |
| ENSG0000 response | Inflamed | ZDHHC11E  | protein_cc chr5  | 710475   | 767067   | - | 3789  | 150.8544 | 0.016706 | 0.863014 | 0.29492  | 2.926265 | 0.004255 | 0.021629 | 1 |
| ENSG0000 response | Inflamed | RP11-166G | sense_ove chr11  | 1.22E+08 | 1.22E+08 | - | 7117  | 209.1504 | 0.002387 | -0.74218 | 0.25365  | -2.92601 | 0.004258 | 0.021639 | 1 |
| ENSG0000 response | Inflamed | FCER2     | protein_cc chr19 | 7753644  | 7767032  | - | 2367  | 279.21   | 0        | -0.81615 | 0.278933 | -2.92598 | 0.004259 | 0.021639 | 1 |
| ENSG0000 response | Inflamed | IL37      | protein_cc chr2  | 1.14E+08 | 1.14E+08 | + | 839   | 7.071599 | 0.221957 | 0.594511 | 0.203191 | 2.925879 | 0.00426  | 0.021641 | 1 |
| ENSG0000 response | Inflamed | SAMD15    | protein_cc chr14 | 77843032 | 77857840 | + | 2616  | 15.8043  | 0.026253 | -0.47448 | 0.162199 | -2.92533 | 0.004267 | 0.021672 | 1 |
| ENSG0000 response | Inflamed | WI2-2373I | lincRNA chr7     | 331310   | 334388   | + | 530   | 1.042959 | 0.763723 | 0.274265 | 0.093772 | 2.924806 | 0.004273 | 0.021701 | 1 |
| ENSG0000 response | Inflamed | PALM2-AK  | protein_cc chr9  | 1.13E+08 | 1.13E+08 | + | 8203  | 5.945107 | 0.295943 | -0.65385 | 0.223592 | -2.92428 | 0.00428  | 0.021731 | 1 |
| ENSG0000 response | Inflamed | EHD1      | protein_cc chr11 | 64619114 | 64655768 | - | 7088  | 6488.365 | 0        | -0.3684  | 0.125989 | -2.92405 | 0.004283 | 0.021741 | 1 |
| ENSG0000 response | Inflamed | STK32B    | protein_cc chr4  | 5053169  | 5502725  | + | 5324  | 84.88783 | 0.002387 | -0.50403 | 0.172393 | -2.92375 | 0.004287 | 0.021756 | 1 |
| ENSG0000 response | Inflamed | RP11-368L | lincRNA chr16    | 63348168 | 63651950 | - | 813   | 2.811456 | 0.451074 | -0.41685 | 0.142611 | -2.92298 | 0.004296 | 0.021801 | 1 |
| ENSG0000 response | Inflamed | PAFAH2    | protein_cc chr1  | 26286258 | 26324648 | - | 3835  | 2027.525 | 0        | 0.343569 | 0.117557 | 2.922565 | 0.004302 | 0.021821 | 1 |
| ENSG0000 response | Inflamed | HMOX1     | protein_cc chr22 | 35776354 | 35790207 | + | 2405  | 3157.811 | 0        | -0.43459 | 0.148702 | -2.92255 | 0.004302 | 0.021821 | 1 |
| ENSG0000 response | Inflamed | AOAH-IT1  | sense_intr chr7  | 36637440 | 36639726 | - | 573   | 0.854415 | 0.799523 | -0.35369 | 0.121052 | -2.92181 | 0.004311 | 0.021861 | 1 |
| ENSG0000 response | Inflamed | KRT8      | protein_cc chr12 | 53290977 | 53343738 | - | 5005  | 186435   | 0        | 0.571728 | 0.195677 | 2.921797 | 0.004312 | 0.021861 | 1 |
| ENSG0000 response | Inflamed | MIER3     | protein_cc chr5  | 56215429 | 56267502 | - | 5763  | 2505.458 | 0        | 0.772986 | 0.264575 | 2.921616 | 0.004314 | 0.021866 | 1 |
| ENSG0000 response | Inflamed | TMEM164   | protein_cc chrX  | 1.09E+08 | 1.09E+08 | + | 6583  | 6632.444 | 0        | 0.365302 | 0.125035 | 2.92159  | 0.004314 | 0.021866 | 1 |
| ENSG0000 response | Inflamed | IL17RB    | protein_cc chr3  | 53880607 | 53899827 | + | 3038  | 483.494  | 0        | 0.568154 | 0.194497 | 2.921144 | 0.00432  | 0.021891 | 1 |
| ENSG0000 response | Inflamed | BNIP3L    | protein_cc chr8  | 26240414 | 26363152 | + | 4307  | 1554.098 | 0        | -0.40064 | 0.13716  | -2.92099 | 0.004322 | 0.021896 | 1 |
| ENSG0000 response | Inflamed | SLC45A3   | protein_cc chr1  | 2.06E+08 | 2.06E+08 | - | 3702  | 1700.766 | 0        | 0.368011 | 0.126001 | 2.920688 | 0.004326 | 0.021909 | 1 |
| ENSG0000 response | Inflamed | RP11-476G | lincRNA chr12    | 40534728 | 40536678 | - | 1951  | 2.073986 | 0.656325 | -0.54761 | 0.187496 | -2.92066 | 0.004326 | 0.021909 | 1 |
| ENSG0000 response | Inflamed | CASP6     | protein_cc chr4  | 1.11E+08 | 1.11E+08 | - | 1936  | 999.642  | 0        | 0.407233 | 0.139437 | 2.920559 | 0.004327 | 0.021911 | 1 |
| ENSG0000 response | Inflamed | GFI1B     | protein_cc chr9  | 1.36E+08 | 1.36E+08 | + | 2467  | 67.91647 | 0.002387 | 0.440908 | 0.150974 | 2.920417 | 0.004329 | 0.021914 | 1 |

|                   |          |                      |                  |          |          |   |       |          |          |          |          |          |          |          |   |
|-------------------|----------|----------------------|------------------|----------|----------|---|-------|----------|----------|----------|----------|----------|----------|----------|---|
| ENSG0000 response | Inflamed | RP11-433J lincRNA    | chr14            | 97059070 | 97062099 | + | 3030  | 4.212411 | 0.424821 | -0.56969 | 0.195073 | -2.92038 | 0.00433  | 0.021914 | 1 |
| ENSG0000 response | Inflamed | LTB4R                | protein_cc chr14 | 24780656 | 24787242 | + | 4465  | 359.8473 | 0        | -0.42281 | 0.144785 | -2.92026 | 0.004331 | 0.021918 | 1 |
| ENSG0000 response | Inflamed | FADS6                | protein_cc chr17 | 72873428 | 72889708 | - | 2636  | 69.03341 | 0.178998 | 1.198926 | 0.410567 | 2.920172 | 0.004332 | 0.02192  | 1 |
| ENSG0000 response | Inflamed | NEXN                 | protein_cc chr1  | 78354198 | 78409580 | + | 4624  | 181.8043 | 0        | -0.59628 | 0.204222 | -2.91974 | 0.004338 | 0.021943 | 1 |
| ENSG0000 response | Inflamed | THOC5                | protein_cc chr22 | 29901868 | 29951205 | - | 7878  | 806.4916 | 0        | -0.22995 | 0.078764 | -2.91953 | 0.00434  | 0.021953 | 1 |
| ENSG0000 response | Inflamed | TMEM38A              | protein_cc chr19 | 16771938 | 16800840 | + | 3005  | 205.7971 | 0        | 0.355017 | 0.121618 | 2.919126 | 0.004346 | 0.021975 | 1 |
| ENSG0000 response | Inflamed | RAB30                | protein_cc chr11 | 82684175 | 82782965 | - | 11701 | 717.3007 | 0        | -0.53009 | 0.1816   | -2.91897 | 0.004348 | 0.021981 | 1 |
| ENSG0000 response | Inflamed | ZBTB47               | protein_cc chr3  | 42695176 | 42709072 | + | 5507  | 818.7542 | 0        | -0.46857 | 0.16059  | -2.91779 | 0.004363 | 0.022053 | 1 |
| ENSG0000 response | Inflamed | RNF5                 | protein_cc chr6  | 32146131 | 32151930 | + | 2043  | 1492.2   | 0        | 0.236583 | 0.081093 | 2.917438 | 0.004367 | 0.022072 | 1 |
| ENSG0000 response | Inflamed | CHP1                 | protein_cc chr15 | 41523037 | 41574043 | + | 3905  | 11625.8  | 0        | 0.365947 | 0.125438 | 2.917354 | 0.004368 | 0.022073 | 1 |
| ENSG0000 response | Inflamed | AKAP5                | protein_cc chr14 | 64932217 | 64941221 | + | 7512  | 404.5179 | 0        | 0.65239  | 0.223639 | 2.917165 | 0.004371 | 0.022081 | 1 |
| ENSG0000 response | Inflamed | JUP                  | protein_cc chr17 | 39775692 | 39943183 | - | 5963  | 21563.08 | 0        | 0.412674 | 0.141481 | 2.916813 | 0.004375 | 0.022098 | 1 |
| ENSG0000 response | Inflamed | RP11-466A antisense  | chr17            | 30822554 | 30826351 | + | 2480  | 4.26969  | 0.513126 | -0.55016 | 0.18862  | -2.91677 | 0.004376 | 0.022098 | 1 |
| ENSG0000 response | Inflamed | KCNQ5                | protein_cc chr6  | 73331520 | 73908574 | + | 7600  | 21.87589 | 0.047733 | -0.6913  | 0.237033 | -2.91647 | 0.00438  | 0.022113 | 1 |
| ENSG0000 response | Inflamed | NXT1                 | protein_cc chr20 | 23331373 | 23335414 | + | 1123  | 340.5251 | 0        | -0.26809 | 0.091927 | -2.91637 | 0.004381 | 0.022113 | 1 |
| ENSG0000 response | Inflamed | FOSL1                | protein_cc chr11 | 65659520 | 65668044 | - | 1887  | 335.6181 | 0.011933 | -1.06299 | 0.364495 | -2.91635 | 0.004381 | 0.022113 | 1 |
| ENSG0000 response | Inflamed | RP11-771F pseudoger  | chr8             | 1.05E+08 | 1.05E+08 | + | 749   | 0.880668 | 0.787589 | 0.279528 | 0.095868 | 2.915756 | 0.004389 | 0.022147 | 1 |
| ENSG0000 response | Inflamed | MNX1-AS2 antisense   | chr7             | 1.57E+08 | 1.57E+08 | + | 374   | 2.665871 | 0.470167 | 0.36016  | 0.123547 | 2.91516  | 0.004397 | 0.022182 | 1 |
| ENSG0000 response | Inflamed | FERMT2               | protein_cc chr14 | 53323986 | 53419153 | - | 8510  | 758.6993 | 0        | -0.57774 | 0.19819  | -2.91508 | 0.004398 | 0.022183 | 1 |
| ENSG0000 response | Inflamed | PRR19                | protein_cc chr19 | 42806250 | 42814973 | + | 2575  | 26.19093 | 0.002387 | -0.32973 | 0.113137 | -2.91445 | 0.004406 | 0.02222  | 1 |
| ENSG0000 response | Inflamed | RGL2                 | protein_cc chr6  | 33259431 | 33267101 | - | 4636  | 1825.578 | 0        | -0.29857 | 0.102448 | -2.91438 | 0.004407 | 0.02222  | 1 |
| ENSG0000 response | Inflamed | NFKBIZ               | protein_cc chr3  | 1.02E+08 | 1.02E+08 | + | 5902  | 4512.265 | 0        | -0.58091 | 0.199366 | -2.91377 | 0.004415 | 0.022256 | 1 |
| ENSG0000 response | Inflamed | CPQ                  | protein_cc chr8  | 97657455 | 98161882 | + | 3457  | 846.1575 | 0        | -0.3293  | 0.113018 | -2.9137  | 0.004416 | 0.022257 | 1 |
| ENSG0000 response | Inflamed | RASSF9               | protein_cc chr12 | 86198331 | 86230348 | - | 1826  | 17.09308 | 0.059666 | -0.64499 | 0.221381 | -2.91347 | 0.004419 | 0.022267 | 1 |
| ENSG0000 response | Inflamed | AC007966 antisense   | chr2             | 1.87E+08 | 1.87E+08 | - | 1472  | 2.451074 | 0.52506  | 0.477336 | 0.163854 | 2.913177 | 0.004422 | 0.022282 | 1 |
| ENSG0000 response | Inflamed | C20orf202 protein_cc | chr20            | 1184098  | 1188918  | + | 1604  | 14.7327  | 0.026253 | -0.47732 | 0.163877 | -2.91264 | 0.004429 | 0.022313 | 1 |
| ENSG0000 response | Inflamed | RP11-452I pseudoger  | chr14            | 52753515 | 52755986 | + | 1949  | 17.47494 | 0.138425 | 0.750801 | 0.257796 | 2.912386 | 0.004433 | 0.022325 | 1 |
| ENSG0000 response | Inflamed | RP11-395L pseudoger  | chr2             | 1.14E+08 | 1.14E+08 | - | 698   | 21.41766 | 0.045346 | 0.544211 | 0.186866 | 2.912311 | 0.004434 | 0.022326 | 1 |
| ENSG0000 response | Inflamed | PODXL2               | protein_cc chr3  | 1.27E+08 | 1.27E+08 | + | 2186  | 914.1647 | 0        | 0.310572 | 0.106651 | 2.912044 | 0.004437 | 0.022339 | 1 |
| ENSG0000 response | Inflamed | RP11-277E antisense  | chr1             | 1.67E+08 | 1.67E+08 | - | 682   | 11.15274 | 0.0358   | 0.453495 | 0.155734 | 2.911991 | 0.004438 | 0.022339 | 1 |
| ENSG0000 response | Inflamed | RP11-10J2 lincRNA    | chr8             | 1.42E+08 | 1.42E+08 | + | 294   | 3.809069 | 0.357995 | 0.415954 | 0.142858 | 2.911656 | 0.004442 | 0.02235  | 1 |
| ENSG0000 response | Inflamed | TTC25                | processed_chr17  | 40086888 | 40117648 | + | 2282  | 8.424821 | 0.057279 | -0.4388  | 0.150704 | -2.91164 | 0.004443 | 0.02235  | 1 |
| ENSG0000 response | Inflamed | SMPD2                | protein_cc chr6  | 1.1E+08  | 1.1E+08  | + | 2014  | 813.8711 | 0        | 0.237653 | 0.081622 | 2.911623 | 0.004443 | 0.02235  | 1 |
| ENSG0000 response | Inflamed | MED9                 | protein_cc chr17 | 17380300 | 17396540 | + | 2940  | 671.4057 | 0        | 0.182644 | 0.062748 | 2.910761 | 0.004454 | 0.022394 | 1 |
| ENSG0000 response | Inflamed | LINC00539 lincRNA    | chr13            | 21877654 | 21922860 | - | 1859  | 12.46301 | 0.019093 | -0.5061  | 0.173873 | -2.91076 | 0.004454 | 0.022394 | 1 |
| ENSG0000 response | Inflamed | METTL1               | protein_cc chr12 | 58162254 | 58166576 | - | 2621  | 415.5203 | 0        | -0.26908 | 0.092443 | -2.91075 | 0.004454 | 0.022394 | 1 |
| ENSG0000 response | Inflamed | SPCS2P4              | pseudoger chr1   | 28421582 | 28422933 | - | 1352  | 77.03341 | 0        | -0.31426 | 0.10798  | -2.91035 | 0.004459 | 0.022417 | 1 |
| ENSG0000 response | Inflamed | OBSL1                | protein_cc chr2  | 2.2E+08  | 2.2E+08  | - | 9731  | 672.2172 | 0        | -0.50659 | 0.174071 | -2.91023 | 0.004461 | 0.02242  | 1 |
| ENSG0000 response | Inflamed | RP11-61J1 lincRNA    | chr1             | 2.13E+08 | 2.13E+08 | + | 1899  | 9.980907 | 0.100239 | 0.482774 | 0.165908 | 2.909897 | 0.004465 | 0.022438 | 1 |
| ENSG0000 response | Inflamed | RIPK3                | protein_cc chr14 | 24805227 | 24809251 | - | 3256  | 1702.866 | 0        | 0.293023 | 0.10071  | 2.909571 | 0.00447  | 0.022455 | 1 |

|                   |          |           |            |       |          |          |   |       |          |          |          |          |          |          |          |   |
|-------------------|----------|-----------|------------|-------|----------|----------|---|-------|----------|----------|----------|----------|----------|----------|----------|---|
| ENSG0000 response | Inflamed | RP11-446E | lincRNA    | chr8  | 56926046 | 56926727 | + | 682   | 9.281623 | 0.059666 | -0.42863 | 0.147353 | -2.9089  | 0.004479 | 0.022496 | 1 |
| ENSG0000 response | Inflamed | RNASEK-C: | protein_cc | chr17 | 6915954  | 6920839  | + | 1947  | 39.93556 | 0        | -0.32338 | 0.111174 | -2.90874 | 0.004481 | 0.022502 | 1 |
| ENSG0000 response | Inflamed | RASL11B   | protein_cc | chr4  | 53728457 | 53733000 | + | 2470  | 25.16706 | 0.019093 | -0.55    | 0.189106 | -2.90842 | 0.004485 | 0.022519 | 1 |
| ENSG0000 response | Inflamed | AKR7A3    | protein_cc | chr1  | 19609052 | 19615744 | - | 1710  | 1949.415 | 0        | 0.566812 | 0.194891 | 2.908356 | 0.004486 | 0.022519 | 1 |
| ENSG0000 response | Inflamed | PITX2     | protein_cc | chr4  | 1.12E+08 | 1.12E+08 | - | 5629  | 410.5418 | 0.155131 | 1.262475 | 0.434139 | 2.907995 | 0.00449  | 0.022535 | 1 |
| ENSG0000 response | Inflamed | RP11-884k | antisense  | chr3  | 53831791 | 53832046 | - | 256   | 1.720764 | 0.661098 | 0.328556 | 0.112985 | 2.90796  | 0.004491 | 0.022535 | 1 |
| ENSG0000 response | Inflamed | RP11-156E | protein_cc | chr1  | 2.45E+08 | 2.45E+08 | - | 1739  | 27.84248 | 0.011933 | 0.537269 | 0.184761 | 2.907906 | 0.004492 | 0.022535 | 1 |
| ENSG0000 response | Inflamed | RAB42     | protein_cc | chr1  | 28918712 | 28921955 | + | 2180  | 191.6993 | 0        | -0.31401 | 0.107993 | -2.90767 | 0.004495 | 0.022547 | 1 |
| ENSG0000 response | Inflamed | SIX5      | protein_cc | chr19 | 46268043 | 46272484 | - | 3556  | 790.2649 | 0        | -0.33614 | 0.115615 | -2.90742 | 0.004498 | 0.022559 | 1 |
| ENSG0000 response | Inflamed | TRIM54    | protein_cc | chr2  | 27505260 | 27530307 | + | 2764  | 8.548926 | 0.128878 | 0.508624 | 0.174948 | 2.907284 | 0.0045   | 0.022564 | 1 |
| ENSG0000 response | Inflamed | KB-1980E  | protein_cc | chr8  | 1.04E+08 | 1.04E+08 | + | 1231  | 5.76611  | 0.217184 | -0.57153 | 0.196607 | -2.90698 | 0.004504 | 0.02258  | 1 |
| ENSG0000 response | Inflamed | ASTN1     | protein_cc | chr1  | 1.77E+08 | 1.77E+08 | - | 9225  | 25.19332 | 0.081146 | -0.84127 | 0.289417 | -2.90679 | 0.004506 | 0.022588 | 1 |
| ENSG0000 response | Inflamed | NCAM2     | protein_cc | chr21 | 22370633 | 22915650 | + | 8732  | 28.03819 | 0.031026 | -0.67426 | 0.232026 | -2.90595 | 0.004518 | 0.02264  | 1 |
| ENSG0000 response | Inflamed | RP11-27N  | lincRNA    | chr8  | 80680377 | 80715077 | + | 789   | 1.875895 | 0.575179 | 0.359229 | 0.123623 | 2.905844 | 0.004519 | 0.022642 | 1 |
| ENSG0000 response | Inflamed | IGHEP1    | IG_C_pseu  | chr14 | 1.06E+08 | 1.06E+08 | - | 745   | 1.892601 | 0.630072 | -0.42242 | 0.145384 | -2.90554 | 0.004523 | 0.022659 | 1 |
| ENSG0000 response | Inflamed | RP11-514F | sense_intr | chr11 | 36408071 | 36409800 | + | 151   | 3.28401  | 0.396181 | 0.452469 | 0.155738 | 2.905311 | 0.004526 | 0.022669 | 1 |
| ENSG0000 response | Inflamed | CACNA2D1  | protein_cc | chr7  | 81575760 | 82073114 | - | 9010  | 161.494  | 0.002387 | -0.61005 | 0.210053 | -2.90425 | 0.00454  | 0.022736 | 1 |
| ENSG0000 response | Inflamed | LINGO3    | protein_cc | chr19 | 2289774  | 2308156  | - | 2332  | 4.107399 | 0.27685  | -0.46953 | 0.161691 | -2.90387 | 0.004545 | 0.022756 | 1 |
| ENSG0000 response | Inflamed | GINS4     | protein_cc | chr8  | 41386725 | 41402565 | + | 5475  | 328.1766 | 0.002387 | -0.39925 | 0.137509 | -2.90347 | 0.004551 | 0.022779 | 1 |
| ENSG0000 response | Inflamed | LRCH2     | protein_cc | chrX  | 1.14E+08 | 1.14E+08 | - | 4923  | 52.41289 | 0.011933 | -0.6201  | 0.213607 | -2.90299 | 0.004557 | 0.022807 | 1 |
| ENSG0000 response | Inflamed | DOCK4     | protein_cc | chr7  | 1.11E+08 | 1.12E+08 | - | 11351 | 673.9021 | 0        | -0.54812 | 0.188826 | -2.90276 | 0.00456  | 0.022818 | 1 |
| ENSG0000 response | Inflamed | TCN2      | protein_cc | chr22 | 31002825 | 31023265 | + | 3122  | 1909.952 | 0        | -0.295   | 0.101633 | -2.90262 | 0.004562 | 0.022823 | 1 |
| ENSG0000 response | Inflamed | RP1-117B1 | antisense  | chr17 | 48473799 | 48475249 | + | 715   | 23.72554 | 0.009547 | 0.506771 | 0.174608 | 2.902337 | 0.004566 | 0.022838 | 1 |
| ENSG0000 response | Inflamed | ADGB      | protein_cc | chr6  | 1.47E+08 | 1.47E+08 | + | 7773  | 7.463007 | 0.205251 | 0.521512 | 0.179709 | 2.901985 | 0.004571 | 0.022857 | 1 |
| ENSG0000 response | Inflamed | SPHK2     | protein_cc | chr19 | 49122548 | 49133974 | + | 6008  | 1569.181 | 0        | 0.290942 | 0.100288 | 2.901075 | 0.004583 | 0.022914 | 1 |
| ENSG0000 response | Inflamed | WIPF2     | protein_cc | chr17 | 38375556 | 38440388 | + | 8123  | 4771.368 | 0        | 0.29631  | 0.102152 | 2.900695 | 0.004588 | 0.022935 | 1 |
| ENSG0000 response | Inflamed | CMKLR1    | protein_cc | chr12 | 1.09E+08 | 1.09E+08 | - | 5690  | 1664.907 | 0        | -0.3914  | 0.134958 | -2.90014 | 0.004595 | 0.022968 | 1 |
| ENSG0000 response | Inflamed | B4GALNT1  | protein_cc | chr12 | 58017193 | 58027138 | - | 8003  | 125.8138 | 0.004773 | -0.64996 | 0.224126 | -2.9     | 0.004597 | 0.022973 | 1 |
| ENSG0000 response | Inflamed | MALL      | protein_cc | chr2  | 1.11E+08 | 1.11E+08 | - | 3167  | 2365.384 | 0        | 0.460379 | 0.15876  | 2.899851 | 0.004599 | 0.022979 | 1 |
| ENSG0000 response | Inflamed | REG1B     | protein_cc | chr2  | 79312156 | 79315145 | - | 2384  | 3166.057 | 0.107399 | -2.19619 | 0.757375 | -2.89974 | 0.004601 | 0.022982 | 1 |
| ENSG0000 response | Inflamed | TOX       | protein_cc | chr8  | 59717977 | 60031767 | - | 4131  | 669.9642 | 0        | 0.403146 | 0.139069 | 2.898892 | 0.004612 | 0.023035 | 1 |
| ENSG0000 response | Inflamed | RP11-465L | antisense  | chr20 | 44642141 | 44650712 | - | 2242  | 2.441527 | 0.498807 | -0.44208 | 0.152516 | -2.89856 | 0.004617 | 0.023053 | 1 |
| ENSG0000 response | Inflamed | TUBBP5    | pseudoger  | chr9  | 1.41E+08 | 1.41E+08 | + | 2712  | 75.39857 | 0.050119 | 0.529809 | 0.182878 | 2.89707  | 0.004637 | 0.02315  | 1 |
| ENSG0000 response | Inflamed | GAL3ST1   | protein_cc | chr22 | 30950622 | 30970574 | - | 3019  | 231.8663 | 0        | 0.616785 | 0.212914 | 2.896865 | 0.00464  | 0.023159 | 1 |
| ENSG0000 response | Inflamed | PI3       | protein_cc | chr20 | 43803517 | 43805185 | + | 577   | 16065.03 | 0        | -1.03377 | 0.356924 | -2.89633 | 0.004647 | 0.023191 | 1 |
| ENSG0000 response | Inflamed | PVALB     | protein_cc | chr22 | 37196728 | 37215523 | - | 1050  | 5.789976 | 0.217184 | -0.53108 | 0.183385 | -2.89598 | 0.004652 | 0.023211 | 1 |
| ENSG0000 response | Inflamed | FBXL16    | protein_cc | chr16 | 742500   | 755829   | - | 3987  | 153.6754 | 0.004773 | -0.45743 | 0.157964 | -2.89579 | 0.004654 | 0.023219 | 1 |
| ENSG0000 response | Inflamed | MMP24-A:  | antisense  | chr20 | 33804265 | 33865934 | - | 3983  | 2965.461 | 0        | 0.251987 | 0.087038 | 2.89515  | 0.004663 | 0.023258 | 1 |
| ENSG0000 response | Inflamed | MDH1      | protein_cc | chr2  | 63815743 | 63834331 | + | 4993  | 2872.826 | 0        | 0.256819 | 0.08871  | 2.895048 | 0.004665 | 0.023261 | 1 |
| ENSG0000 response | Inflamed | MIR3936   | miRNA      | chr5  | 1.32E+08 | 1.32E+08 | - | 110   | 8.980907 | 0.145585 | 0.530743 | 0.183344 | 2.894792 | 0.004668 | 0.023274 | 1 |

|                   |          |           |                  |          |          |   |       |          |          |          |          |          |          |          |   |
|-------------------|----------|-----------|------------------|----------|----------|---|-------|----------|----------|----------|----------|----------|----------|----------|---|
| ENSG0000 response | Inflamed | CIITA     | protein_cc chr16 | 10971055 | 11026079 | + | 12036 | 3802.305 | 0        | -0.57771 | 0.199588 | -2.8945  | 0.004672 | 0.02329  | 1 |
| ENSG0000 response | Inflamed | CCIN      | protein_cc chr9  | 36169389 | 36171329 | + | 1941  | 3.245823 | 0.443914 | -0.52934 | 0.182884 | -2.89438 | 0.004674 | 0.023293 | 1 |
| ENSG0000 response | Inflamed | KRT20     | protein_cc chr17 | 39032193 | 39041479 | - | 1846  | 35583    | 0        | 0.9875   | 0.341197 | 2.894221 | 0.004676 | 0.0233   | 1 |
| ENSG0000 response | Inflamed | MSL3      | protein_cc chrX  | 11776278 | 11793870 | + | 6494  | 1039.131 | 0        | -0.42969 | 0.148476 | -2.89402 | 0.004679 | 0.023309 | 1 |
| ENSG0000 response | Inflamed | DZIP1     | protein_cc chr13 | 96230457 | 96296957 | - | 8469  | 309.5322 | 0.002387 | -0.54812 | 0.189425 | -2.89362 | 0.004684 | 0.023332 | 1 |
| ENSG0000 response | Inflamed | CTD-2196f | antisense chr16  | 23698370 | 23699665 | - | 473   | 30.36516 | 0.02148  | 0.578984 | 0.200096 | 2.893527 | 0.004685 | 0.023334 | 1 |
| ENSG0000 response | Inflamed | ADAMTS1   | protein_cc chr15 | 1.01E+08 | 1.01E+08 | - | 7800  | 157.6778 | 0.002387 | 0.39465  | 0.136407 | 2.893178 | 0.00469  | 0.023353 | 1 |
| ENSG0000 response | Inflamed | IGHV3-38  | IG_V_gene chr14  | 1.07E+08 | 1.07E+08 | - | 426   | 1.601432 | 0.72315  | -0.42981 | 0.148563 | -2.89309 | 0.004691 | 0.023355 | 1 |
| ENSG0000 response | Inflamed | RPN2      | protein_cc chr20 | 35806813 | 35870022 | + | 2815  | 11918.03 | 0        | -0.32463 | 0.112235 | -2.89241 | 0.004701 | 0.023397 | 1 |
| ENSG0000 response | Inflamed | TRBV19    | TR_V_gene chr7   | 1.42E+08 | 1.42E+08 | + | 552   | 38.06205 | 0.00716  | -0.5594  | 0.193418 | -2.89218 | 0.004704 | 0.023409 | 1 |
| ENSG0000 response | Inflamed | BLCAP     | protein_cc chr20 | 36120874 | 36156333 | - | 3927  | 2834.516 | 0        | 0.257162 | 0.08892  | 2.892064 | 0.004706 | 0.023412 | 1 |
| ENSG0000 response | Inflamed | R3HDM4    | protein_cc chr19 | 896503   | 913240   | - | 2961  | 3778.84  | 0        | -0.26934 | 0.093136 | -2.89191 | 0.004708 | 0.023416 | 1 |
| ENSG0000 response | Inflamed | RP1-244F2 | antisense chr6   | 45388816 | 45389742 | - | 927   | 27.52745 | 0.026253 | -0.588   | 0.203327 | -2.89188 | 0.004708 | 0.023416 | 1 |
| ENSG0000 response | Inflamed | C15orf54  | protein_cc chr15 | 39542885 | 39547046 | + | 3078  | 1.599045 | 0.708831 | -0.50297 | 0.173948 | -2.89148 | 0.004714 | 0.023439 | 1 |
| ENSG0000 response | Inflamed | KLF7-IT1  | sense_intr chr2  | 2.08E+08 | 2.08E+08 | - | 655   | 2.840095 | 0.381862 | -0.43212 | 0.149454 | -2.8913  | 0.004716 | 0.023447 | 1 |
| ENSG0000 response | Inflamed | ITPR1     | protein_cc chr3  | 4535032  | 4889524  | + | 12902 | 1010.924 | 0        | -0.55807 | 0.193047 | -2.89083 | 0.004723 | 0.023475 | 1 |
| ENSG0000 response | Inflamed | SLCO5A1   | protein_cc chr8  | 70579282 | 70747299 | - | 9992  | 104.3628 | 0.004773 | -0.52883 | 0.182939 | -2.89077 | 0.004723 | 0.023475 | 1 |
| ENSG0000 response | Inflamed | CCDC13    | protein_cc chr3  | 42734155 | 42814745 | - | 4966  | 51.73031 | 0.004773 | 0.496498 | 0.171775 | 2.890399 | 0.004729 | 0.023494 | 1 |
| ENSG0000 response | Inflamed | RP11-739f | antisense chr1   | 2.04E+08 | 2.04E+08 | + | 486   | 2.472554 | 0.420048 | 0.371645 | 0.128581 | 2.89035  | 0.004729 | 0.023494 | 1 |
| ENSG0000 response | Inflamed | RP11-483E | lincRNA chr3     | 1.5E+08  | 1.5E+08  | - | 335   | 0.866348 | 0.785203 | 0.232107 | 0.080311 | 2.890108 | 0.004733 | 0.023507 | 1 |
| ENSG0000 response | Inflamed | CTB-176F2 | antisense chr19  | 23506770 | 23511903 | + | 5134  | 1.548926 | 0.625298 | 0.348133 | 0.120463 | 2.889958 | 0.004735 | 0.023512 | 1 |
| ENSG0000 response | Inflamed | STXBP6    | protein_cc chr14 | 25278862 | 25519503 | - | 8067  | 606.0597 | 0        | 0.437323 | 0.151328 | 2.889903 | 0.004735 | 0.023512 | 1 |
| ENSG0000 response | Inflamed | MAGI3     | protein_cc chr1  | 1.14E+08 | 1.14E+08 | + | 8180  | 1450.095 | 0        | 0.539726 | 0.186804 | 2.88927  | 0.004744 | 0.023551 | 1 |
| ENSG0000 response | Inflamed | GDE1      | protein_cc chr16 | 19513015 | 19533467 | - | 4412  | 3942.981 | 0        | 0.268088 | 0.092802 | 2.888818 | 0.004751 | 0.023578 | 1 |
| ENSG0000 response | Inflamed | AC010525  | lincRNA chr19    | 56207251 | 56209196 | + | 537   | 33.59666 | 0.038186 | 0.592581 | 0.205153 | 2.888491 | 0.004755 | 0.023595 | 1 |
| ENSG0000 response | Inflamed | ADH6      | protein_cc chr4  | 1E+08    | 1E+08    | - | 4401  | 474.0095 | 0.009547 | 0.739221 | 0.255924 | 2.888436 | 0.004756 | 0.023595 | 1 |
| ENSG0000 response | Inflamed | TRPM2     | protein_cc chr21 | 45770046 | 45862964 | + | 6705  | 743.1957 | 0        | -0.3418  | 0.118337 | -2.88834 | 0.004757 | 0.023597 | 1 |
| ENSG0000 response | Inflamed | CHMP4C    | protein_cc chr8  | 82644669 | 82671750 | + | 1866  | 646.136  | 0        | 0.527811 | 0.182764 | 2.887938 | 0.004763 | 0.023621 | 1 |
| ENSG0000 response | Inflamed | FGD1      | protein_cc chrX  | 54471887 | 54522599 | - | 4275  | 336.4893 | 0        | -0.43994 | 0.152351 | -2.88771 | 0.004766 | 0.023632 | 1 |
| ENSG0000 response | Inflamed | CD69      | protein_cc chr12 | 9905082  | 9913497  | - | 2832  | 211.7995 | 0        | -0.62535 | 0.216624 | -2.8868  | 0.004779 | 0.023691 | 1 |
| ENSG0000 response | Inflamed | PLA2G5    | protein_cc chr1  | 20354672 | 20417683 | + | 2607  | 22.50835 | 0.02148  | -0.63882 | 0.221347 | -2.88608 | 0.004789 | 0.023736 | 1 |
| ENSG0000 response | Inflamed | GRB2      | protein_cc chr17 | 73314157 | 73401790 | - | 4716  | 4592.427 | 0        | -0.24037 | 0.083293 | -2.8858  | 0.004793 | 0.023751 | 1 |
| ENSG0000 response | Inflamed | CYP3A4    | protein_cc chr7  | 99354604 | 99381888 | - | 3120  | 286.0382 | 0.090692 | 1.474807 | 0.511071 | 2.885717 | 0.004794 | 0.023752 | 1 |
| ENSG0000 response | Inflamed | GSN       | protein_cc chr9  | 1.24E+08 | 1.24E+08 | + | 11097 | 32104.5  | 0        | 0.360321 | 0.124879 | 2.88536  | 0.004799 | 0.023773 | 1 |
| ENSG0000 response | Inflamed | INCA1     | protein_cc chr17 | 4891425  | 4900905  | - | 1553  | 54.75179 | 0        | 0.330048 | 0.114413 | 2.884706 | 0.004808 | 0.023814 | 1 |
| ENSG0000 response | Inflamed | Y_RNA     | misc_RNA chr16   | 15009314 | 15009413 | - | 100   | 42.68019 | 0.059666 | 0.510976 | 0.17714  | 2.884588 | 0.00481  | 0.023818 | 1 |
| ENSG0000 response | Inflamed | OR1J4     | protein_cc chr9  | 1.25E+08 | 1.25E+08 | + | 942   | 2.298329 | 0.639618 | -0.57672 | 0.199942 | -2.88445 | 0.004812 | 0.023822 | 1 |
| ENSG0000 response | Inflamed | ATP1A4    | protein_cc chr1  | 1.6E+08  | 1.6E+08  | + | 6284  | 7.541766 | 0.198091 | -0.5174  | 0.179379 | -2.88439 | 0.004812 | 0.023822 | 1 |
| ENSG0000 response | Inflamed | YPEL5     | protein_cc chr2  | 30369807 | 30383399 | + | 3421  | 1816.983 | 0        | -0.30426 | 0.105498 | -2.88403 | 0.004818 | 0.023839 | 1 |
| ENSG0000 response | Inflamed | AC138517  | protein_cc chr5  | 1.39E+08 | 1.39E+08 | + | 399   | 90.1957  | 0.009547 | 0.595138 | 0.206357 | 2.884023 | 0.004818 | 0.023839 | 1 |

|                   |          |           |            |       |          |          |   |       |          |          |          |          |          |          |          |   |
|-------------------|----------|-----------|------------|-------|----------|----------|---|-------|----------|----------|----------|----------|----------|----------|----------|---|
| ENSG0000 response | Inflamed | AP001044  | lincRNA    | chr21 | 40285093 | 40287072 | - | 407   | 5.190931 | 0.143198 | 0.42731  | 0.148173 | 2.883859 | 0.00482  | 0.023846 | 1 |
| ENSG0000 response | Inflamed | AC006026  | antisense  | chr7  | 23719814 | 23720405 | - | 143   | 8.935561 | 0.121718 | 0.472283 | 0.163791 | 2.883454 | 0.004826 | 0.02387  | 1 |
| ENSG0000 response | Inflamed | SDSL      | protein_cc | chr12 | 1.14E+08 | 1.14E+08 | + | 2216  | 509.148  | 0        | 0.259877 | 0.090143 | 2.882946 | 0.004833 | 0.023901 | 1 |
| ENSG0000 response | Inflamed | PDE4C     | protein_cc | chr19 | 18318771 | 18366229 | - | 8532  | 632.2625 | 0        | 0.542429 | 0.188177 | 2.88255  | 0.004838 | 0.023923 | 1 |
| ENSG0000 response | Inflamed | STAC3     | protein_cc | chr12 | 57637236 | 57644976 | - | 2096  | 110.9952 | 0        | -0.26119 | 0.090613 | -2.8825  | 0.004839 | 0.023923 | 1 |
| ENSG0000 response | Inflamed | RP11-384C | lincRNA    | chr2  | 2.23E+08 | 2.23E+08 | - | 1412  | 8.195704 | 0.171838 | -0.64455 | 0.223671 | -2.88169 | 0.004851 | 0.023975 | 1 |
| ENSG0000 response | Inflamed | AC009133  | antisense  | chr16 | 29829301 | 29832573 | - | 1125  | 330.7542 | 0        | 0.557835 | 0.193616 | 2.881146 | 0.004858 | 0.024002 | 1 |
| ENSG0000 response | Inflamed | FAM216A   | protein_cc | chr12 | 1.11E+08 | 1.11E+08 | + | 2753  | 62.43198 | 0.002387 | -0.47576 | 0.165131 | -2.88113 | 0.004859 | 0.024002 | 1 |
| ENSG0000 response | Inflamed | SLC23A3   | protein_cc | chr2  | 2.2E+08  | 2.2E+08  | - | 6531  | 461.0382 | 0.002387 | 0.693464 | 0.240693 | 2.88111  | 0.004859 | 0.024002 | 1 |
| ENSG0000 response | Inflamed | ZP3       | protein_cc | chr7  | 76026835 | 76071388 | + | 2716  | 115.4248 | 0        | 0.392214 | 0.136144 | 2.88088  | 0.004862 | 0.024014 | 1 |
| ENSG0000 response | Inflamed | CCDC162P  | pseudoger  | chr6  | 1.1E+08  | 1.1E+08  | + | 3773  | 206.8759 | 0        | 0.824821 | 0.286315 | 2.880812 | 0.004863 | 0.024014 | 1 |
| ENSG0000 response | Inflamed | CTC-471F3 | lincRNA    | chr19 | 40526292 | 40526948 | + | 657   | 3.183771 | 0.341289 | -0.42759 | 0.148442 | -2.8805  | 0.004868 | 0.024031 | 1 |
| ENSG0000 response | Inflamed | LRRC1     | protein_cc | chr6  | 53659295 | 53788919 | + | 4897  | 2175.89  | 0        | 0.576074 | 0.199995 | 2.880446 | 0.004868 | 0.024031 | 1 |
| ENSG0000 response | Inflamed | RP11-263k | lincRNA    | chr12 | 82906456 | 82909596 | + | 3141  | 0.906921 | 0.787589 | 0.29573  | 0.102675 | 2.880258 | 0.004871 | 0.02404  | 1 |
| ENSG0000 response | Inflamed | AP001610  | lincRNA    | chr21 | 42931052 | 42934885 | - | 422   | 21.51074 | 0.0358   | 0.68479  | 0.237766 | 2.880098 | 0.004873 | 0.024046 | 1 |
| ENSG0000 response | Inflamed | NIPSNAP3  | protein_cc | chr9  | 1.08E+08 | 1.08E+08 | + | 2585  | 734.5776 | 0        | 0.320103 | 0.111147 | 2.880009 | 0.004875 | 0.024048 | 1 |
| ENSG0000 response | Inflamed | MRRF      | protein_cc | chr9  | 1.25E+08 | 1.25E+08 | + | 3162  | 959.9952 | 0        | 0.303106 | 0.105249 | 2.87989  | 0.004876 | 0.024052 | 1 |
| ENSG0000 response | Inflamed | HSD17B1P  | pseudoger  | chr17 | 40698782 | 40700724 | + | 955   | 3.167064 | 0.329356 | 0.376207 | 0.130636 | 2.879821 | 0.004877 | 0.024052 | 1 |
| ENSG0000 response | Inflamed | C11orf80  | protein_cc | chr11 | 66511922 | 66610987 | + | 3953  | 736.3771 | 0        | -0.25953 | 0.090132 | -2.87943 | 0.004883 | 0.024076 | 1 |
| ENSG0000 response | Inflamed | RP11-386M | lincRNA    | chr15 | 93138790 | 93139692 | - | 374   | 5.651551 | 0.303103 | 0.57288  | 0.198962 | 2.879339 | 0.004884 | 0.024077 | 1 |
| ENSG0000 response | Inflamed | PTCHD3    | protein_cc | chr10 | 27687116 | 27703297 | - | 2529  | 1.455847 | 0.775656 | -0.41678 | 0.144756 | -2.87921 | 0.004886 | 0.02408  | 1 |
| ENSG0000 response | Inflamed | AC110771  | protein_cc | chr4  | 1.87E+08 | 1.87E+08 | - | 714   | 4.01432  | 0.202864 | 0.370837 | 0.1288   | 2.879171 | 0.004887 | 0.02408  | 1 |
| ENSG0000 response | Inflamed | WASL      | protein_cc | chr7  | 1.23E+08 | 1.23E+08 | - | 4435  | 3789.232 | 0        | 0.472545 | 0.164132 | 2.879051 | 0.004888 | 0.024084 | 1 |
| ENSG0000 response | Inflamed | RP4-536B2 | lincRNA    | chr16 | 87807094 | 87812980 | - | 802   | 1.417661 | 0.644391 | -0.35479 | 0.12324  | -2.87881 | 0.004892 | 0.024096 | 1 |
| ENSG0000 response | Inflamed | ATG13     | protein_cc | chr11 | 46638826 | 46696368 | + | 7315  | 4245.456 | 0        | -0.15436 | 0.053625 | -2.87845 | 0.004897 | 0.024114 | 1 |
| ENSG0000 response | Inflamed | PDE6G     | protein_cc | chr17 | 79617489 | 79630142 | - | 1583  | 60.18138 | 0        | -0.46822 | 0.162666 | -2.87843 | 0.004897 | 0.024114 | 1 |
| ENSG0000 response | Inflamed | ITGA1     | protein_cc | chr5  | 52083730 | 52255040 | + | 18566 | 1712.74  | 0        | -0.47634 | 0.165493 | -2.87834 | 0.004898 | 0.024114 | 1 |
| ENSG0000 response | Inflamed | BSPRY     | protein_cc | chr9  | 1.16E+08 | 1.16E+08 | + | 2339  | 1428.11  | 0        | 0.436772 | 0.151746 | 2.878301 | 0.004899 | 0.024114 | 1 |
| ENSG0000 response | Inflamed | TUSC3     | protein_cc | chr8  | 15274724 | 15624158 | + | 5190  | 340.568  | 0        | -0.49184 | 0.170935 | -2.87739 | 0.004912 | 0.024174 | 1 |
| ENSG0000 response | Inflamed | TFR2      | protein_cc | chr7  | 1E+08    | 1E+08    | - | 5065  | 46.90215 | 0        | -0.366   | 0.127206 | -2.87721 | 0.004915 | 0.024182 | 1 |
| ENSG0000 response | Inflamed | RP11-213f | lincRNA    | chr5  | 90575914 | 90576959 | - | 1046  | 1.026253 | 0.785203 | -0.36319 | 0.126235 | -2.87708 | 0.004916 | 0.024187 | 1 |
| ENSG0000 response | Inflamed | BYSL      | protein_cc | chr6  | 41888926 | 41900784 | + | 2248  | 463.9165 | 0        | -0.25836 | 0.089803 | -2.87693 | 0.004919 | 0.024193 | 1 |
| ENSG0000 response | Inflamed | TIMP2     | protein_cc | chr17 | 76849059 | 76921469 | - | 5633  | 12777.42 | 0        | -0.45423 | 0.157894 | -2.87683 | 0.00492  | 0.024195 | 1 |
| ENSG0000 response | Inflamed | PLTP      | protein_cc | chr20 | 44527399 | 44540794 | - | 2402  | 2864.146 | 0        | -0.46452 | 0.161479 | -2.87667 | 0.004922 | 0.024202 | 1 |
| ENSG0000 response | Inflamed | SWAP70    | protein_cc | chr11 | 9685624  | 9774538  | + | 7190  | 1531.957 | 0        | -0.50862 | 0.176825 | -2.8764  | 0.004926 | 0.024217 | 1 |
| ENSG0000 response | Inflamed | CTNNA3    | protein_cc | chr10 | 67672276 | 69455927 | - | 11133 | 8.441527 | 0.136038 | -0.50612 | 0.175969 | -2.87619 | 0.004929 | 0.024227 | 1 |
| ENSG0000 response | Inflamed | UQCRC2    | protein_cc | chr16 | 21963981 | 21994981 | + | 4992  | 6792.983 | 0        | 0.363625 | 0.126468 | 2.875229 | 0.004943 | 0.024291 | 1 |
| ENSG0000 response | Inflamed | B3GALT5   | protein_cc | chr21 | 40928369 | 41045064 | + | 14191 | 10385.09 | 0        | 0.939736 | 0.326889 | 2.874787 | 0.004949 | 0.024317 | 1 |
| ENSG0000 response | Inflamed | POM121L5  | pseudoger  | chr22 | 24647796 | 24661493 | + | 5137  | 71.59189 | 0.023866 | -0.78774 | 0.274031 | -2.87462 | 0.004952 | 0.024325 | 1 |
| ENSG0000 response | Inflamed | RNU6-353  | snRNA      | chr15 | 43994561 | 43994668 | + | 108   | 1.923628 | 0.565632 | 0.352828 | 0.122743 | 2.87453  | 0.004953 | 0.024326 | 1 |

|                   |          |           |                  |          |          |   |       |          |          |          |          |          |          |          |   |
|-------------------|----------|-----------|------------------|----------|----------|---|-------|----------|----------|----------|----------|----------|----------|----------|---|
| ENSG0000 response | Inflamed | PIP4K2A   | protein_cc chr10 | 22823778 | 23003484 | - | 5088  | 1494.613 | 0        | -0.422   | 0.146851 | -2.87365 | 0.004966 | 0.024384 | 1 |
| ENSG0000 response | Inflamed | TRAV36DV  | TR_V_gene chr14  | 22694641 | 22695149 | + | 356   | 4.133652 | 0.281623 | -0.47821 | 0.166424 | -2.87344 | 0.004969 | 0.024393 | 1 |
| ENSG0000 response | Inflamed | FBXO31    | protein_cc chr16 | 87360593 | 87425748 | - | 6810  | 2351.888 | 0        | 0.287578 | 0.100083 | 2.873401 | 0.00497  | 0.024393 | 1 |
| ENSG0000 response | Inflamed | PDE10A    | protein_cc chr6  | 1.66E+08 | 1.66E+08 | - | 10384 | 121.0119 | 0.019093 | -0.7847  | 0.273106 | -2.87325 | 0.004972 | 0.0244   | 1 |
| ENSG0000 response | Inflamed | PHLPP2    | protein_cc chr16 | 71671738 | 71758604 | - | 12493 | 3004.675 | 0        | 0.700497 | 0.243813 | 2.873094 | 0.004974 | 0.024406 | 1 |
| ENSG0000 response | Inflamed | AC079630  | antisense chr12  | 40579811 | 40617605 | - | 585   | 2.606205 | 0.472554 | -0.4395  | 0.15302  | -2.87215 | 0.004988 | 0.024469 | 1 |
| ENSG0000 response | Inflamed | CPNE9     | protein_cc chr3  | 9745491  | 9771592  | + | 2332  | 4.078759 | 0.171838 | -0.40328 | 0.140444 | -2.87148 | 0.004997 | 0.024512 | 1 |
| ENSG0000 response | Inflamed | IGHV3-71  | IG_V_pseu chr14  | 1.07E+08 | 1.07E+08 | - | 359   | 5.260143 | 0.267303 | -0.51445 | 0.179196 | -2.87086 | 0.005007 | 0.024549 | 1 |
| ENSG0000 response | Inflamed | PKDREJ    | protein_cc chr22 | 46651560 | 46659219 | - | 7660  | 41.40334 | 0.019093 | 0.708147 | 0.246669 | 2.870838 | 0.005007 | 0.024549 | 1 |
| ENSG0000 response | Inflamed | SLC27A4   | protein_cc chr9  | 1.31E+08 | 1.31E+08 | + | 3110  | 3516.014 | 0        | 0.313894 | 0.109354 | 2.870444 | 0.005013 | 0.024572 | 1 |
| ENSG0000 response | Inflamed | DNAJC19P  | pseudoger chr19  | 42144937 | 42145267 | - | 331   | 1.171838 | 0.770883 | 0.285282 | 0.099392 | 2.870262 | 0.005015 | 0.024581 | 1 |
| ENSG0000 response | Inflamed | CDH8      | protein_cc chr16 | 61681146 | 62070939 | - | 13529 | 2.057279 | 0.596659 | -0.47646 | 0.166008 | -2.87012 | 0.005017 | 0.024587 | 1 |
| ENSG0000 response | Inflamed | ERMP1     | protein_cc chr9  | 5765076  | 5833117  | - | 6528  | 2502.167 | 0        | 0.455663 | 0.158765 | 2.870038 | 0.005019 | 0.024588 | 1 |
| ENSG0000 response | Inflamed | AC110769  | lincRNA chr2     | 1.15E+08 | 1.15E+08 | + | 815   | 1.016706 | 0.725537 | -0.30574 | 0.106533 | -2.8699  | 0.005021 | 0.024593 | 1 |
| ENSG0000 response | Inflamed | RP11-356C | lincRNA chr14    | 38025363 | 38036300 | - | 532   | 40.26014 | 0.052506 | 0.680725 | 0.237217 | 2.869629 | 0.005025 | 0.024605 | 1 |
| ENSG0000 response | Inflamed | FAM26E    | protein_cc chr6  | 1.17E+08 | 1.17E+08 | + | 9784  | 132.1695 | 0        | -0.6119  | 0.213236 | -2.8696  | 0.005025 | 0.024605 | 1 |
| ENSG0000 response | Inflamed | PC        | protein_cc chr11 | 66615704 | 66725847 | - | 5927  | 1753.451 | 0        | 0.403307 | 0.140557 | 2.869345 | 0.005029 | 0.024619 | 1 |
| ENSG0000 response | Inflamed | TUBB4A    | protein_cc chr19 | 6494330  | 6502859  | - | 3466  | 31.56563 | 0.02148  | -0.62821 | 0.218979 | -2.86881 | 0.005037 | 0.024653 | 1 |
| ENSG0000 response | Inflamed | NDUFA5    | protein_cc chr7  | 1.23E+08 | 1.23E+08 | - | 9851  | 1240.439 | 0        | 0.341161 | 0.118927 | 2.868652 | 0.005039 | 0.02466  | 1 |
| ENSG0000 response | Inflamed | MYOZ1     | protein_cc chr10 | 75391412 | 75401515 | - | 1541  | 3.553699 | 0.26969  | -0.38819 | 0.135334 | -2.86843 | 0.005042 | 0.024671 | 1 |
| ENSG0000 response | Inflamed | RP11-262I | pseudoger chr9   | 66493572 | 66494196 | - | 625   | 3.546539 | 0.377088 | -0.47377 | 0.165174 | -2.86833 | 0.005044 | 0.024674 | 1 |
| ENSG0000 response | Inflamed | RIC8A     | protein_cc chr11 | 207511   | 215113   | + | 6685  | 3857.363 | 0        | -0.15788 | 0.055052 | -2.86782 | 0.005051 | 0.024702 | 1 |
| ENSG0000 response | Inflamed | RP11-404F | antisense chr14  | 96725748 | 96734961 | - | 738   | 1.427208 | 0.696897 | 0.296409 | 0.103358 | 2.867775 | 0.005052 | 0.024702 | 1 |
| ENSG0000 response | Inflamed | CNTN3     | protein_cc chr3  | 74311719 | 74570291 | - | 5109  | 110.599  | 0.088305 | 1.026821 | 0.358059 | 2.867742 | 0.005052 | 0.024702 | 1 |
| ENSG0000 response | Inflamed | GATA2     | protein_cc chr3  | 1.28E+08 | 1.28E+08 | - | 4459  | 564.9499 | 0.002387 | -0.5228  | 0.182318 | -2.86751 | 0.005056 | 0.024715 | 1 |
| ENSG0000 response | Inflamed | PGS1      | protein_cc chr17 | 76374721 | 76421195 | + | 4965  | 1679.167 | 0        | -0.33472 | 0.116737 | -2.8673  | 0.005059 | 0.024725 | 1 |
| ENSG0000 response | Inflamed | KLF7      | protein_cc chr2  | 2.08E+08 | 2.08E+08 | - | 9262  | 753.5442 | 0        | -0.5308  | 0.185147 | -2.86694 | 0.005064 | 0.024746 | 1 |
| ENSG0000 response | Inflamed | MMP16     | protein_cc chr8  | 89044237 | 89340254 | - | 12115 | 19.74224 | 0.071599 | -0.64514 | 0.225035 | -2.86682 | 0.005066 | 0.02475  | 1 |
| ENSG0000 response | Inflamed | MLXIP     | protein_cc chr12 | 1.23E+08 | 1.23E+08 | + | 13905 | 19604.41 | 0        | 0.381902 | 0.133227 | 2.866556 | 0.00507  | 0.024765 | 1 |
| ENSG0000 response | Inflamed | RP11-468E | pseudoger chr14  | 24505662 | 24520580 | + | 1717  | 12.36754 | 0.059666 | 0.461277 | 0.160926 | 2.866395 | 0.005072 | 0.024772 | 1 |
| ENSG0000 response | Inflamed | RP11-363E | sense_ove chr9   | 19453207 | 19455171 | + | 1965  | 208.4033 | 0.002387 | 0.645772 | 0.225307 | 2.866185 | 0.005075 | 0.024782 | 1 |
| ENSG0000 response | Inflamed | FAM47E    | protein_cc chr4  | 77135193 | 77204933 | + | 9508  | 51.40811 | 0.002387 | 0.633385 | 0.221004 | 2.865949 | 0.005079 | 0.024795 | 1 |
| ENSG0000 response | Inflamed | NUDT16L1  | protein_cc chr16 | 4743695  | 4745860  | + | 2068  | 1169.609 | 0        | 0.204772 | 0.071456 | 2.865696 | 0.005082 | 0.024808 | 1 |
| ENSG0000 response | Inflamed | PROCR     | protein_cc chr20 | 33759876 | 33765165 | + | 1348  | 732.5943 | 0        | -0.42643 | 0.148812 | -2.86557 | 0.005084 | 0.024813 | 1 |
| ENSG0000 response | Inflamed | GPR39     | protein_cc chr2  | 1.33E+08 | 1.33E+08 | + | 3343  | 674.9308 | 0        | 0.479652 | 0.167412 | 2.865099 | 0.005091 | 0.024836 | 1 |
| ENSG0000 response | Inflamed | EML1      | protein_cc chr14 | 1E+08    | 1E+08    | + | 8899  | 661.9499 | 0        | -0.61169 | 0.213496 | -2.86509 | 0.005091 | 0.024836 | 1 |
| ENSG0000 response | Inflamed | ANKRD6    | protein_cc chr6  | 90142889 | 90343553 | + | 8329  | 136.9021 | 0.002387 | -0.50927 | 0.177751 | -2.86506 | 0.005092 | 0.024836 | 1 |
| ENSG0000 response | Inflamed | TMEM169   | protein_cc chr2  | 2.17E+08 | 2.17E+08 | + | 3628  | 23.87589 | 0.019093 | -0.43394 | 0.1515   | -2.86429 | 0.005103 | 0.024887 | 1 |
| ENSG0000 response | Inflamed | AC004066  | antisense chr4   | 1.06E+08 | 1.06E+08 | - | 572   | 3.747017 | 0.279236 | 0.476829 | 0.166481 | 2.86417  | 0.005105 | 0.024887 | 1 |
| ENSG0000 response | Inflamed | LPPR1     | protein_cc chr9  | 1.04E+08 | 1.04E+08 | + | 3669  | 4.379475 | 0.300716 | 0.432129 | 0.150875 | 2.864159 | 0.005105 | 0.024887 | 1 |



|                   |          |           |                  |          |          |   |       |          |          |          |          |          |          |          |   |
|-------------------|----------|-----------|------------------|----------|----------|---|-------|----------|----------|----------|----------|----------|----------|----------|---|
| ENSG0000 response | Inflamed | ZNF521    | protein_cc chr18 | 22641890 | 22932154 | - | 6223  | 258.2673 | 0.002387 | -0.55802 | 0.194912 | -2.86295 | 0.005123 | 0.02497  | 1 |
| ENSG0000 response | Inflamed | GABRR2    | protein_cc chr6  | 89966927 | 90025018 | - | 2230  | 51.76611 | 0.040573 | -0.7633  | 0.266639 | -2.86268 | 0.005127 | 0.024985 | 1 |
| ENSG0000 response | Inflamed | SMARCA1   | protein_cc chrX  | 1.29E+08 | 1.29E+08 | - | 4101  | 318.1862 | 0        | -0.60909 | 0.212812 | -2.86209 | 0.005136 | 0.025024 | 1 |
| ENSG0000 response | Inflamed | HNRNPAB   | protein_cc chr5  | 1.78E+08 | 1.78E+08 | + | 2144  | 8560.506 | 0        | 0.219718 | 0.076784 | 2.861519 | 0.005145 | 0.025061 | 1 |
| ENSG0000 response | Inflamed | FAM25A    | protein_cc chr10 | 88780063 | 88784487 | + | 345   | 2.386635 | 0.708831 | -0.63669 | 0.222551 | -2.86086 | 0.005155 | 0.025104 | 1 |
| ENSG0000 response | Inflamed | CDH22     | protein_cc chr20 | 44802372 | 44937137 | - | 4929  | 14.4463  | 0.102625 | 0.722058 | 0.252428 | 2.860452 | 0.005161 | 0.025129 | 1 |
| ENSG0000 response | Inflamed | MFSD6L    | protein_cc chr17 | 8700436  | 8702667  | - | 2232  | 258.9403 | 0        | 0.524375 | 0.183322 | 2.860399 | 0.005161 | 0.025129 | 1 |
| ENSG0000 response | Inflamed | EBF2      | protein_cc chr8  | 25699246 | 25902913 | - | 7077  | 11.03819 | 0.338902 | -0.86605 | 0.302843 | -2.85973 | 0.005171 | 0.025173 | 1 |
| ENSG0000 response | Inflamed | TMEM194   | protein_cc chr2  | 1.91E+08 | 1.91E+08 | - | 6521  | 177.6683 | 0        | -0.39038 | 0.136513 | -2.85962 | 0.005173 | 0.025176 | 1 |
| ENSG0000 response | Inflamed | SDR42E2   | protein_cc chr16 | 22177618 | 22203075 | + | 2528  | 1.871122 | 0.548926 | -0.33558 | 0.117367 | -2.85924 | 0.005179 | 0.025198 | 1 |
| ENSG0000 response | Inflamed | GLT8D2    | protein_cc chr12 | 1.04E+08 | 1.04E+08 | - | 3271  | 352.1838 | 0        | -0.5492  | 0.19208  | -2.8592  | 0.005179 | 0.025198 | 1 |
| ENSG0000 response | Inflamed | NUDT6     | protein_cc chr4  | 1.24E+08 | 1.24E+08 | - | 6591  | 146.9427 | 0        | 0.323664 | 0.113206 | 2.859058 | 0.005182 | 0.025202 | 1 |
| ENSG0000 response | Inflamed | INHBA-AS1 | antisense chr7   | 41733514 | 41818986 | + | 5417  | 0.906921 | 0.782816 | -0.33681 | 0.117805 | -2.85902 | 0.005182 | 0.025202 | 1 |
| ENSG0000 response | Inflamed | HDC       | protein_cc chr15 | 50534144 | 50558223 | - | 3956  | 386.8663 | 0        | -0.7002  | 0.244916 | -2.85894 | 0.005183 | 0.025203 | 1 |
| ENSG0000 response | Inflamed | NPAS1     | protein_cc chr19 | 47523077 | 47549033 | + | 2582  | 34.69928 | 0        | -0.31825 | 0.111346 | -2.85817 | 0.005195 | 0.025255 | 1 |
| ENSG0000 response | Inflamed | RAI2      | protein_cc chrX  | 17818169 | 17879457 | - | 2622  | 500.7327 | 0.002387 | -0.41974 | 0.146891 | -2.85751 | 0.005205 | 0.025298 | 1 |
| ENSG0000 response | Inflamed | NECAB3    | protein_cc chr20 | 32244893 | 32262269 | - | 4342  | 865.284  | 0        | 0.2454   | 0.085887 | 2.857239 | 0.005209 | 0.025314 | 1 |
| ENSG0000 response | Inflamed | SYT12     | protein_cc chr11 | 66774249 | 66818334 | + | 10830 | 134.222  | 0.019093 | -0.97813 | 0.342364 | -2.85698 | 0.005213 | 0.025328 | 1 |
| ENSG0000 response | Inflamed | RP11-68I3 | sense_intr chr17 | 27971814 | 27972865 | - | 1052  | 6.945107 | 0.193317 | -0.60286 | 0.211027 | -2.8568  | 0.005216 | 0.025336 | 1 |
| ENSG0000 response | Inflamed | RP11-367C | lincRNA chr6     | 25015180 | 25042398 | - | 1030  | 9.620525 | 0.090692 | -0.51626 | 0.180736 | -2.85643 | 0.005221 | 0.025359 | 1 |
| ENSG0000 response | Inflamed | ASIC2     | protein_cc chr17 | 31340105 | 32501983 | - | 5597  | 21.7685  | 0.054893 | 0.633198 | 0.221717 | 2.855886 | 0.00523  | 0.025395 | 1 |
| ENSG0000 response | Inflamed | SLC5A7    | protein_cc chr2  | 1.09E+08 | 1.09E+08 | + | 5168  | 6.200477 | 0.305489 | 0.622469 | 0.217991 | 2.855484 | 0.005236 | 0.025416 | 1 |
| ENSG0000 response | Inflamed | TRAJ12    | TR_J_gene chr14  | 23000889 | 23000948 | + | 60    | 1.77327  | 0.615752 | -0.37691 | 0.131996 | -2.85546 | 0.005236 | 0.025416 | 1 |
| ENSG0000 response | Inflamed | CTB-58E17 | lincRNA chr17    | 36858705 | 36861000 | + | 2296  | 84.13365 | 0        | -0.25763 | 0.090231 | -2.85525 | 0.005239 | 0.025427 | 1 |
| ENSG0000 response | Inflamed | CNTD1     | protein_cc chr17 | 40950810 | 40963605 | + | 3378  | 10.93556 | 0.083532 | 0.56547  | 0.198059 | 2.855062 | 0.005242 | 0.025437 | 1 |
| ENSG0000 response | Inflamed | TMSB15A   | protein_cc chrX  | 1.02E+08 | 1.02E+08 | - | 685   | 8.918854 | 0.093079 | -0.54826 | 0.192038 | -2.85494 | 0.005244 | 0.025439 | 1 |
| ENSG0000 response | Inflamed | RPL7AP8   | pseudoger chr10  | 88390582 | 88391385 | - | 804   | 1.25537  | 0.670644 | -0.31437 | 0.110119 | -2.85485 | 0.005245 | 0.025439 | 1 |
| ENSG0000 response | Inflamed | PRKD1     | protein_cc chr14 | 30045687 | 30661104 | - | 5177  | 136.5847 | 0.00716  | -0.46809 | 0.163964 | -2.85484 | 0.005246 | 0.025439 | 1 |
| ENSG0000 response | Inflamed | C1orf198  | protein_cc chr1  | 2.31E+08 | 2.31E+08 | - | 5161  | 1644.592 | 0        | -0.33698 | 0.11805  | -2.85457 | 0.00525  | 0.025452 | 1 |
| ENSG0000 response | Inflamed | VAV3      | protein_cc chr1  | 1.08E+08 | 1.09E+08 | - | 7271  | 1775.506 | 0        | 0.574893 | 0.201397 | 2.854532 | 0.00525  | 0.025452 | 1 |
| ENSG0000 response | Inflamed | PCDH6     | protein_cc chr5  | 1.41E+08 | 1.41E+08 | + | 3186  | 12.18854 | 0.059666 | -0.50507 | 0.176942 | -2.85443 | 0.005252 | 0.025455 | 1 |
| ENSG0000 response | Inflamed | ANKRD63   | protein_cc chr15 | 40573645 | 40574787 | - | 1143  | 1.279236 | 0.680191 | 0.314533 | 0.110197 | 2.854273 | 0.005254 | 0.025462 | 1 |
| ENSG0000 response | Inflamed | GRB10     | protein_cc chr7  | 50657760 | 50861159 | - | 9944  | 1171.63  | 0        | -0.37974 | 0.133052 | -2.85406 | 0.005257 | 0.025473 | 1 |
| ENSG0000 response | Inflamed | RP11-467L | pseudoger chr12  | 31901034 | 31901174 | - | 141   | 7.809069 | 0.322196 | 0.606311 | 0.212447 | 2.85394  | 0.005259 | 0.025477 | 1 |
| ENSG0000 response | Inflamed | LINC00567 | lincRNA chr13    | 1.11E+08 | 1.11E+08 | - | 3409  | 0.966587 | 0.782816 | -0.37446 | 0.131218 | -2.85373 | 0.005262 | 0.025487 | 1 |
| ENSG0000 response | Inflamed | AC009948  | antisense chr2   | 1.79E+08 | 1.79E+08 | + | 4001  | 123.7112 | 0        | -0.56833 | 0.199166 | -2.85355 | 0.005265 | 0.025487 | 1 |
| ENSG0000 response | Inflamed | PARD6A    | protein_cc chr16 | 67694849 | 67696681 | + | 1488  | 126.3389 | 0        | -0.32897 | 0.115285 | -2.85354 | 0.005265 | 0.025487 | 1 |
| ENSG0000 response | Inflamed | TNFSF15   | protein_cc chr9  | 1.18E+08 | 1.18E+08 | - | 7889  | 445.716  | 0.002387 | -0.64481 | 0.225971 | -2.85351 | 0.005266 | 0.025487 | 1 |
| ENSG0000 response | Inflamed | MUC20     | protein_cc chr3  | 1.95E+08 | 1.95E+08 | + | 8086  | 3172.301 | 0        | 0.589794 | 0.206692 | 2.853496 | 0.005266 | 0.025487 | 1 |
| ENSG0000 response | Inflamed | AC007381  | lincRNA chr2     | 60577730 | 60580151 | - | 2005  | 2.424821 | 0.589499 | -0.42286 | 0.148203 | -2.85322 | 0.00527  | 0.025503 | 1 |

|                   |          |           |                  |          |          |   |       |          |          |          |          |          |          |          |   |
|-------------------|----------|-----------|------------------|----------|----------|---|-------|----------|----------|----------|----------|----------|----------|----------|---|
| ENSG0000 response | Inflamed | C1QA      | protein_cc chr1  | 22962999 | 22966101 | + | 1272  | 6434.263 | 0        | -0.40664 | 0.14253  | -2.853   | 0.005274 | 0.025514 | 1 |
| ENSG0000 response | Inflamed | EPHB6     | protein_cc chr7  | 1.43E+08 | 1.43E+08 | + | 5355  | 288.8616 | 0        | -0.61317 | 0.214936 | -2.85278 | 0.005277 | 0.025526 | 1 |
| ENSG0000 response | Inflamed | FAM134B   | protein_cc chr5  | 16473147 | 16617167 | - | 4568  | 1022.263 | 0        | 0.597423 | 0.209432 | 2.852584 | 0.00528  | 0.025536 | 1 |
| ENSG0000 response | Inflamed | RCE1      | protein_cc chr11 | 66610306 | 66614017 | + | 2995  | 830.7494 | 0        | 0.171801 | 0.060244 | 2.85174  | 0.005293 | 0.025594 | 1 |
| ENSG0000 response | Inflamed | SLC44A5   | protein_cc chr1  | 75667816 | 76076801 | - | 6314  | 62.95943 | 0.212411 | 0.931326 | 0.326602 | 2.85156  | 0.005296 | 0.025602 | 1 |
| ENSG0000 response | Inflamed | PDE3A     | protein_cc chr12 | 20522179 | 20837315 | + | 8398  | 1268.31  | 0        | 0.606205 | 0.212601 | 2.851376 | 0.005299 | 0.025611 | 1 |
| ENSG0000 response | Inflamed | ST3GAL4   | protein_cc chr11 | 1.26E+08 | 1.26E+08 | + | 4462  | 4438.905 | 0        | 0.433629 | 0.152084 | 2.851241 | 0.005301 | 0.025614 | 1 |
| ENSG0000 response | Inflamed | RP11-401C | antisense chr17  | 10195137 | 10221243 | + | 523   | 0.883055 | 0.77327  | -0.3217  | 0.112829 | -2.85122 | 0.005301 | 0.025614 | 1 |
| ENSG0000 response | Inflamed | LINC00654 | lincRNA chr20    | 5476713  | 5485259  | - | 6294  | 379.3914 | 0        | 0.496278 | 0.174084 | 2.850797 | 0.005307 | 0.02564  | 1 |
| ENSG0000 response | Inflamed | LGR5      | protein_cc chr12 | 71833550 | 71980090 | + | 5251  | 346.6277 | 0.009547 | 0.987268 | 0.346365 | 2.85037  | 0.005314 | 0.025667 | 1 |
| ENSG0000 response | Inflamed | UNC13B    | protein_cc chr9  | 35161999 | 35405335 | + | 6592  | 4936.277 | 0        | 0.409972 | 0.143835 | 2.850293 | 0.005315 | 0.025668 | 1 |
| ENSG0000 response | Inflamed | SYN1      | protein_cc chrX  | 47431303 | 47479252 | - | 3203  | 61.04296 | 0        | -0.46259 | 0.162344 | -2.84947 | 0.005328 | 0.025725 | 1 |
| ENSG0000 response | Inflamed | ALDH6A1   | protein_cc chr14 | 74523553 | 74551196 | - | 6680  | 1296.22  | 0        | 0.395658 | 0.138857 | 2.849396 | 0.005329 | 0.025726 | 1 |
| ENSG0000 response | Inflamed | SEL1L3    | protein_cc chr4  | 25749055 | 25865382 | - | 7483  | 10927.8  | 0        | -0.3028  | 0.106277 | -2.84914 | 0.005333 | 0.02574  | 1 |
| ENSG0000 response | Inflamed | SPTB      | protein_cc chr14 | 65213002 | 65346601 | - | 14771 | 46.25776 | 0.02148  | -0.63298 | 0.222204 | -2.84866 | 0.00534  | 0.025771 | 1 |
| ENSG0000 response | Inflamed | DLG3      | protein_cc chrX  | 69664711 | 69725337 | + | 7841  | 3265.27  | 0        | 0.40624  | 0.142622 | 2.848374 | 0.005345 | 0.025788 | 1 |
| ENSG0000 response | Inflamed | RP11-757F | pseudoger chr3   | 1.12E+08 | 1.12E+08 | - | 519   | 17.42005 | 0.045346 | 0.533885 | 0.187467 | 2.847888 | 0.005352 | 0.02582  | 1 |
| ENSG0000 response | Inflamed | ITPK1     | protein_cc chr14 | 93403259 | 93582665 | - | 6783  | 6890.685 | 0        | 0.229733 | 0.08069  | 2.847126 | 0.005364 | 0.025872 | 1 |
| ENSG0000 response | Inflamed | RNA5SP38  | rRNA chr14       | 24627812 | 24627931 | + | 120   | 7.584726 | 0.121718 | -0.47713 | 0.167617 | -2.84654 | 0.005373 | 0.025911 | 1 |
| ENSG0000 response | Inflamed | PPAPDC1B  | protein_cc chr8  | 38120648 | 38126761 | - | 4414  | 2091.864 | 0        | -0.31906 | 0.112106 | -2.84603 | 0.005381 | 0.025941 | 1 |
| ENSG0000 response | Inflamed | FOLR1     | protein_cc chr11 | 71900602 | 71907345 | + | 1577  | 16.6778  | 0.131265 | 0.769378 | 0.270341 | 2.845956 | 0.005383 | 0.025941 | 1 |
| ENSG0000 response | Inflamed | RP11-112L | lincRNA chr20    | 48789087 | 48793096 | + | 782   | 3.897375 | 0.26253  | -0.3757  | 0.132011 | -2.84595 | 0.005383 | 0.025941 | 1 |
| ENSG0000 response | Inflamed | TCF4      | protein_cc chr18 | 52889562 | 53332018 | - | 22377 | 1756.847 | 0        | -0.5958  | 0.209378 | -2.84557 | 0.005388 | 0.025965 | 1 |
| ENSG0000 response | Inflamed | RP11-120M | processed_chr17  | 66409764 | 66521090 | + | 1863  | 11.91885 | 0.057279 | -0.48284 | 0.16973  | -2.84474 | 0.005401 | 0.026023 | 1 |
| ENSG0000 response | Inflamed | CHIA      | protein_cc chr1  | 1.12E+08 | 1.12E+08 | + | 4632  | 1.324582 | 0.756563 | -0.37024 | 0.130166 | -2.84436 | 0.005408 | 0.026046 | 1 |
| ENSG0000 response | Inflamed | AC004540  | lincRNA chr7     | 26438213 | 26538594 | + | 4151  | 29.43437 | 0.002387 | -0.41044 | 0.144302 | -2.84431 | 0.005408 | 0.026046 | 1 |
| ENSG0000 response | Inflamed | RNASE6    | protein_cc chr14 | 21249210 | 21250626 | + | 1061  | 605.1647 | 0        | -0.42274 | 0.148659 | -2.84369 | 0.005418 | 0.026085 | 1 |
| ENSG0000 response | Inflamed | LINC00866 | lincRNA chr10    | 99588235 | 99609555 | - | 418   | 4.186158 | 0.436754 | 0.518633 | 0.182382 | 2.843663 | 0.005418 | 0.026085 | 1 |
| ENSG0000 response | Inflamed | CYP4F22   | protein_cc chr19 | 15619304 | 15663128 | + | 2644  | 13.46062 | 0.031026 | -0.41708 | 0.146678 | -2.8435  | 0.005421 | 0.026088 | 1 |
| ENSG0000 response | Inflamed | TPPP      | protein_cc chr5  | 660883   | 693510   | - | 5116  | 506.5251 | 0.002387 | 0.653087 | 0.229678 | 2.843495 | 0.005421 | 0.026088 | 1 |
| ENSG0000 response | Inflamed | CLEC12B   | protein_cc chr12 | 10163226 | 10171218 | + | 3667  | 6.057279 | 0.26969  | -0.57928 | 0.203729 | -2.8434  | 0.005423 | 0.02609  | 1 |
| ENSG0000 response | Inflamed | MMP17     | protein_cc chr12 | 1.32E+08 | 1.32E+08 | + | 4003  | 128.8616 | 0.002387 | -0.50549 | 0.177813 | -2.84279 | 0.005432 | 0.026132 | 1 |
| ENSG0000 response | Inflamed | GPR98     | protein_cc chr5  | 89825161 | 90460038 | + | 23499 | 36.08592 | 0.023866 | 0.604393 | 0.21261  | 2.842731 | 0.005433 | 0.026132 | 1 |
| ENSG0000 response | Inflamed | RP11-582J | antisense chr8   | 22398358 | 22402918 | - | 4076  | 8.198091 | 0.176611 | 0.597481 | 0.2102   | 2.842438 | 0.005438 | 0.026149 | 1 |
| ENSG0000 response | Inflamed | HDAC11    | protein_cc chr3  | 13521224 | 13547916 | + | 5273  | 1058.086 | 0        | 0.276989 | 0.097458 | 2.842135 | 0.005442 | 0.026167 | 1 |
| ENSG0000 response | Inflamed | AC005077  | pseudoger chr7   | 75719749 | 75738097 | - | 2576  | 48.50119 | 0.040573 | 0.569539 | 0.200489 | 2.840753 | 0.005464 | 0.026267 | 1 |
| ENSG0000 response | Inflamed | HOXB4     | protein_cc chr17 | 46652875 | 46657473 | - | 3757  | 300.2983 | 0        | -0.32956 | 0.116026 | -2.84041 | 0.00547  | 0.026288 | 1 |
| ENSG0000 response | Inflamed | AC092299  | pseudoger chr19  | 197075   | 199431   | - | 2070  | 16.41289 | 0.069212 | -0.63433 | 0.223334 | -2.8403  | 0.005471 | 0.026291 | 1 |
| ENSG0000 response | Inflamed | RP11-542M | lincRNA chr16    | 86015356 | 86018329 | + | 474   | 9.121718 | 0.286396 | 0.597269 | 0.210288 | 2.840244 | 0.005472 | 0.026291 | 1 |
| ENSG0000 response | Inflamed | GRM7      | protein_cc chr3  | 6811688  | 7783215  | + | 8209  | 4.529833 | 0.221957 | 0.422215 | 0.148657 | 2.840184 | 0.005473 | 0.026291 | 1 |

|                   |          |           |                  |          |          |   |       |          |          |          |          |          |          |          |   |
|-------------------|----------|-----------|------------------|----------|----------|---|-------|----------|----------|----------|----------|----------|----------|----------|---|
| ENSG0000 response | Inflamed | DCUN1D5   | protein_cc chr11 | 1.03E+08 | 1.03E+08 | - | 1700  | 380.7757 | 0        | -0.31424 | 0.11065  | -2.83997 | 0.005477 | 0.026303 | 1 |
| ENSG0000 response | Inflamed | DOPEY2    | protein_cc chr21 | 37529080 | 37666572 | + | 9030  | 3773.802 | 0        | 0.461408 | 0.162502 | 2.839394 | 0.005486 | 0.026342 | 1 |
| ENSG0000 response | Inflamed | MICAL3    | protein_cc chr22 | 18270415 | 18507325 | - | 22361 | 2615.687 | 0        | 0.466416 | 0.164297 | 2.838854 | 0.005494 | 0.026378 | 1 |
| ENSG0000 response | Inflamed | MLX       | protein_cc chr17 | 40719086 | 40725257 | + | 4259  | 3866.193 | 0        | 0.195887 | 0.069016 | 2.838261 | 0.005504 | 0.026419 | 1 |
| ENSG0000 response | Inflamed | LINC01022 | antisense chr7   | 1.58E+08 | 1.58E+08 | + | 394   | 0.949881 | 0.732697 | 0.289204 | 0.101944 | 2.836896 | 0.005526 | 0.026513 | 1 |
| ENSG0000 response | Inflamed | AC012314  | antisense chr19  | 54622891 | 54628722 | - | 4158  | 56.12649 | 0.02148  | -0.68721 | 0.242244 | -2.83687 | 0.005526 | 0.026513 | 1 |
| ENSG0000 response | Inflamed | MRPL2     | protein_cc chr6  | 43021767 | 43027544 | - | 2539  | 935.4439 | 0        | 0.184688 | 0.065104 | 2.836842 | 0.005526 | 0.026513 | 1 |
| ENSG0000 response | Inflamed | SPON1     | processed_chr11  | 13983914 | 14289646 | + | 5639  | 4792.737 | 0        | 0.532026 | 0.187556 | 2.836618 | 0.00553  | 0.026525 | 1 |
| ENSG0000 response | Inflamed | CTB-11I22 | antisense chr5   | 1.59E+08 | 1.59E+08 | + | 638   | 1.26253  | 0.692124 | -0.33933 | 0.119631 | -2.83649 | 0.005532 | 0.02653  | 1 |
| ENSG0000 response | Inflamed | IDH3A     | protein_cc chr15 | 78423840 | 78464291 | + | 6832  | 2589.124 | 0        | 0.379359 | 0.13375  | 2.836334 | 0.005535 | 0.026537 | 1 |
| ENSG0000 response | Inflamed | SH3D19    | protein_cc chr4  | 1.52E+08 | 1.52E+08 | - | 7789  | 4999.038 | 0        | 0.423766 | 0.149411 | 2.83625  | 0.005536 | 0.026539 | 1 |
| ENSG0000 response | Inflamed | SLCO4A1   | protein_cc chr20 | 61273797 | 61317137 | + | 4051  | 1070.208 | 0        | -0.45881 | 0.161809 | -2.83553 | 0.005547 | 0.026589 | 1 |
| ENSG0000 response | Inflamed | PDIA6     | protein_cc chr2  | 10923517 | 10978103 | - | 4101  | 10690.01 | 0        | -0.28343 | 0.09996  | -2.83543 | 0.005549 | 0.026592 | 1 |
| ENSG0000 response | Inflamed | C10orf55  | protein_cc chr10 | 75669727 | 75682535 | - | 2514  | 13.19809 | 0.031026 | -0.51589 | 0.182022 | -2.83421 | 0.005569 | 0.026681 | 1 |
| ENSG0000 response | Inflamed | CTB-36O1. | pseudoger chr5   | 1.34E+08 | 1.34E+08 | - | 747   | 258.3294 | 0        | 0.428692 | 0.151312 | 2.83316  | 0.005586 | 0.026758 | 1 |
| ENSG0000 response | Inflamed | ID2       | protein_cc chr2  | 8818975  | 8824583  | + | 2205  | 2400.406 | 0        | 0.320879 | 0.113263 | 2.833048 | 0.005587 | 0.026761 | 1 |
| ENSG0000 response | Inflamed | C8orf82   | protein_cc chr8  | 1.46E+08 | 1.46E+08 | - | 3001  | 1481.714 | 0        | 0.259529 | 0.09162  | 2.832671 | 0.005594 | 0.026786 | 1 |
| ENSG0000 response | Inflamed | CS        | protein_cc chr12 | 56665483 | 56694176 | - | 6402  | 9961.675 | 0        | 0.262513 | 0.092678 | 2.832515 | 0.005596 | 0.026793 | 1 |
| ENSG0000 response | Inflamed | CAMK2G    | protein_cc chr10 | 75572259 | 75634343 | - | 6770  | 2100.377 | 0        | 0.294929 | 0.104127 | 2.832407 | 0.005598 | 0.026793 | 1 |
| ENSG0000 response | Inflamed | MIAT      | lincRNA chr22    | 27042392 | 27072438 | + | 11590 | 1993.89  | 0        | -0.96406 | 0.34037  | -2.83239 | 0.005598 | 0.026793 | 1 |
| ENSG0000 response | Inflamed | RNFT2     | protein_cc chr12 | 1.17E+08 | 1.17E+08 | + | 6152  | 47.88305 | 0        | -0.32768 | 0.115702 | -2.83209 | 0.005603 | 0.026812 | 1 |
| ENSG0000 response | Inflamed | TRGV5P    | TR_V_psei chr7   | 38384631 | 38385100 | - | 354   | 10.29117 | 0.212411 | -0.5644  | 0.199331 | -2.83149 | 0.005613 | 0.026853 | 1 |
| ENSG0000 response | Inflamed | IGHV3-16  | IG_V_gene chr14  | 1.07E+08 | 1.07E+08 | - | 425   | 2.46778  | 0.48926  | -0.4207  | 0.14859  | -2.83127 | 0.005616 | 0.026865 | 1 |
| ENSG0000 response | Inflamed | HRASLS5   | protein_cc chr11 | 63228876 | 63258666 | - | 3268  | 20.72792 | 0.031026 | -0.50576 | 0.178645 | -2.83109 | 0.005619 | 0.026873 | 1 |
| ENSG0000 response | Inflamed | CYP4X1    | protein_cc chr1  | 47427036 | 47516423 | + | 2941  | 82.95704 | 0.004773 | -0.60299 | 0.212991 | -2.83104 | 0.00562  | 0.026873 | 1 |
| ENSG0000 response | Inflamed | NR5A2     | protein_cc chr1  | 2E+08    | 2E+08    | + | 7795  | 967.3317 | 0        | 0.475647 | 0.168028 | 2.830752 | 0.005625 | 0.026891 | 1 |
| ENSG0000 response | Inflamed | RP11-867C | antisense chr11  | 65134909 | 65142770 | + | 564   | 6.047733 | 0.353222 | 0.550444 | 0.194476 | 2.8304   | 0.00563  | 0.026913 | 1 |
| ENSG0000 response | Inflamed | FRMD6-AS  | lincRNA chr14    | 51921230 | 52066670 | - | 917   | 1.448687 | 0.673031 | 0.457676 | 0.161737 | 2.829747 | 0.005641 | 0.026959 | 1 |
| ENSG0000 response | Inflamed | LINC01058 | lincRNA chr13    | 30993656 | 30996374 | - | 448   | 2.193317 | 0.513126 | -0.37328 | 0.131924 | -2.8295  | 0.005645 | 0.026973 | 1 |
| ENSG0000 response | Inflamed | ARL4C     | protein_cc chr2  | 2.35E+08 | 2.35E+08 | - | 4013  | 1244.458 | 0        | -0.43431 | 0.153499 | -2.82939 | 0.005647 | 0.026977 | 1 |
| ENSG0000 response | Inflamed | NDUFAF4   | protein_cc chr6  | 97337189 | 97345757 | - | 2540  | 433.3628 | 0        | 0.305587 | 0.108011 | 2.829225 | 0.005649 | 0.026985 | 1 |
| ENSG0000 response | Inflamed | C1orf168  | protein_cc chr1  | 57184477 | 57285369 | - | 4633  | 9.078759 | 0.200477 | 0.577865 | 0.204361 | 2.827668 | 0.005675 | 0.027102 | 1 |
| ENSG0000 response | Inflamed | RP6-201G  | lincRNA chrX     | 67233312 | 67234743 | - | 1432  | 4.894988 | 0.243437 | 0.519138 | 0.183602 | 2.827512 | 0.005677 | 0.027105 | 1 |
| ENSG0000 response | Inflamed | RUNDC3B   | protein_cc chr7  | 87256864 | 87461611 | + | 4710  | 84.8568  | 0.019093 | 0.601025 | 0.212565 | 2.827495 | 0.005678 | 0.027105 | 1 |
| ENSG0000 response | Inflamed | U52111.12 | pseudoger chrX   | 1.53E+08 | 1.53E+08 | + | 315   | 3.458234 | 0.326969 | 0.346044 | 0.122391 | 2.827355 | 0.00568  | 0.027109 | 1 |
| ENSG0000 response | Inflamed | RHBDD1    | protein_cc chr2  | 2.28E+08 | 2.28E+08 | + | 6926  | 1166.01  | 0        | -0.33108 | 0.1171   | -2.8273  | 0.005681 | 0.027109 | 1 |
| ENSG0000 response | Inflamed | KB-1440D  | sense_intr chr22 | 22016223 | 22016652 | + | 430   | 2.935561 | 0.377088 | -0.41227 | 0.14582  | -2.82725 | 0.005682 | 0.027109 | 1 |
| ENSG0000 response | Inflamed | KIF20A    | protein_cc chr5  | 1.38E+08 | 1.38E+08 | + | 3958  | 401.9189 | 0        | -0.47607 | 0.168417 | -2.82676 | 0.00569  | 0.027143 | 1 |
| ENSG0000 response | Inflamed | UBXN10    | protein_cc chr1  | 20512578 | 20522541 | + | 5571  | 460.2172 | 0        | 0.481966 | 0.17051  | 2.826618 | 0.005692 | 0.027149 | 1 |
| ENSG0000 response | Inflamed | LGALS2    | protein_cc chr22 | 37966255 | 37978623 | - | 826   | 506.5632 | 0        | 0.587908 | 0.208008 | 2.826379 | 0.005696 | 0.027163 | 1 |

|                   |          |            |                  |          |            |       |          |          |          |          |          |          |          |   |
|-------------------|----------|------------|------------------|----------|------------|-------|----------|----------|----------|----------|----------|----------|----------|---|
| ENSG0000 response | Inflamed | EVL        | protein_cc chr14 | 1E+08    | 1.01E+08 + | 10585 | 3041.041 | 0        | -0.43174 | 0.152768 | -2.82613 | 0.0057   | 0.027178 | 1 |
| ENSG0000 response | Inflamed | MAD1L1     | protein_cc chr7  | 1855429  | 2272878 -  | 6955  | 826.673  | 0        | -0.20995 | 0.074306 | -2.82548 | 0.005711 | 0.027223 | 1 |
| ENSG0000 response | Inflamed | LA16c-349  | antisense chr16  | 705034   | 706194 -   | 994   | 17.89737 | 0.050119 | -0.5525  | 0.195556 | -2.8253  | 0.005714 | 0.027233 | 1 |
| ENSG0000 response | Inflamed | LHX2       | protein_cc chr9  | 1.27E+08 | 1.27E+08 + | 2655  | 11.54654 | 0.062053 | -0.48439 | 0.171468 | -2.82498 | 0.005719 | 0.027253 | 1 |
| ENSG0000 response | Inflamed | AC074389   | lincRNA chr7     | 1778266  | 1781927 -  | 989   | 23.8043  | 0.002387 | -0.48773 | 0.172652 | -2.82492 | 0.00572  | 0.027253 | 1 |
| ENSG0000 response | Inflamed | DCDC2B     | protein_cc chr1  | 32674695 | 32681797 + | 1869  | 0.906921 | 0.78043  | 0.324691 | 0.114946 | 2.824737 | 0.005723 | 0.027262 | 1 |
| ENSG0000 response | Inflamed | SEC61A1    | protein_cc chr3  | 1.28E+08 | 1.28E+08 + | 4697  | 17706.64 | 0        | -0.24274 | 0.085964 | -2.82374 | 0.00574  | 0.027335 | 1 |
| ENSG0000 response | Inflamed | SPTA1      | protein_cc chr1  | 1.59E+08 | 1.59E+08 - | 10025 | 2.436754 | 0.491647 | -0.4124  | 0.146051 | -2.82368 | 0.005741 | 0.027335 | 1 |
| ENSG0000 response | Inflamed | RP11-8761  | antisense chr16  | 11034576 | 11036878 + | 2147  | 42.55609 | 0.009547 | -0.5222  | 0.184939 | -2.8236  | 0.005742 | 0.027337 | 1 |
| ENSG0000 response | Inflamed | USP54      | protein_cc chr10 | 75257296 | 75385711 - | 9850  | 2835.01  | 0        | 0.477322 | 0.169054 | 2.823486 | 0.005744 | 0.027341 | 1 |
| ENSG0000 response | Inflamed | TRAV38-2   | TR_V_gene chr14  | 22748988 | 22749631 + | 395   | 11.13365 | 0.064439 | -0.52095 | 0.184517 | -2.82331 | 0.005747 | 0.02735  | 1 |
| ENSG0000 response | Inflamed | RP3-462E2  | lincRNA chr12    | 1.12E+08 | 1.12E+08 + | 569   | 56.79236 | 0.026253 | 0.463118 | 0.164055 | 2.82294  | 0.005753 | 0.027374 | 1 |
| ENSG0000 response | Inflamed | GAB1       | protein_cc chr4  | 1.44E+08 | 1.44E+08 + | 10119 | 1225.943 | 0        | 0.4534   | 0.16062  | 2.822816 | 0.005755 | 0.027379 | 1 |
| ENSG0000 response | Inflamed | AC012123   | protein_cc chr18 | 30349758 | 30354376 + | 1661  | 1.238663 | 0.74463  | -0.32585 | 0.115444 | -2.82255 | 0.005759 | 0.027395 | 1 |
| ENSG0000 response | Inflamed | TRAV26-1   | TR_V_gene chr14  | 22591276 | 22592243 + | 537   | 15.5895  | 0.054893 | -0.58042 | 0.205647 | -2.8224  | 0.005762 | 0.027398 | 1 |
| ENSG0000 response | Inflamed | PRDM15     | protein_cc chr21 | 43218385 | 43299591 - | 13004 | 814.6038 | 0        | -0.38939 | 0.137964 | -2.82238 | 0.005762 | 0.027398 | 1 |
| ENSG0000 response | Inflamed | TM6SF2     | protein_cc chr19 | 19375173 | 19384200 - | 2188  | 250.5465 | 0.002387 | 0.883012 | 0.312868 | 2.822313 | 0.005763 | 0.027398 | 1 |
| ENSG0000 response | Inflamed | CARD8      | protein_cc chr19 | 48684027 | 48759203 - | 12894 | 1564.007 | 0        | -0.53953 | 0.191171 | -2.82226 | 0.005764 | 0.027398 | 1 |
| ENSG0000 response | Inflamed | RBM24      | protein_cc chr6  | 17281577 | 17294106 + | 3444  | 55.05251 | 0.026253 | 0.870208 | 0.308412 | 2.821577 | 0.005776 | 0.027447 | 1 |
| ENSG0000 response | Inflamed | RP11-44M   | pseudoger chr7   | 1E+08    | 1E+08 +    | 1006  | 2.448687 | 0.463007 | 0.351899 | 0.124744 | 2.820972 | 0.005786 | 0.02749  | 1 |
| ENSG0000 response | Inflamed | LURAP1     | protein_cc chr1  | 46669006 | 46686933 + | 1854  | 41.56325 | 0        | -0.36017 | 0.127685 | -2.82077 | 0.005789 | 0.027501 | 1 |
| ENSG0000 response | Inflamed | AC010149   | antisense chr2   | 2.31E+08 | 2.31E+08 - | 692   | 5.897375 | 0.238663 | -0.53079 | 0.188218 | -2.82011 | 0.0058   | 0.027549 | 1 |
| ENSG0000 response | Inflamed | CAPG       | protein_cc chr2  | 85621871 | 85645555 - | 2607  | 3490.659 | 0        | -0.26114 | 0.092606 | -2.81994 | 0.005803 | 0.027557 | 1 |
| ENSG0000 response | Inflamed | PLIN1      | protein_cc chr15 | 90207596 | 90222658 - | 3797  | 60.27208 | 0.02148  | 0.587798 | 0.208464 | 2.819655 | 0.005808 | 0.027575 | 1 |
| ENSG0000 response | Inflamed | ABCC13     | pseudoger chr21  | 15608527 | 15735075 + | 10722 | 212.568  | 0.00716  | 0.739919 | 0.262457 | 2.8192   | 0.005815 | 0.027606 | 1 |
| ENSG0000 response | Inflamed | GNE        | protein_cc chr9  | 36214438 | 36277053 - | 5477  | 4901.272 | 0        | 0.532029 | 0.188747 | 2.818742 | 0.005823 | 0.027637 | 1 |
| ENSG0000 response | Inflamed | ITGA4      | protein_cc chr2  | 1.82E+08 | 1.82E+08 + | 7901  | 988.3914 | 0        | -0.56136 | 0.199174 | -2.81844 | 0.005828 | 0.027656 | 1 |
| ENSG0000 response | Inflamed | hsa-mir-45 | miRNA chr14      | 1.06E+08 | 1.06E+08 - | 60    | 32.05012 | 0.054893 | -0.78615 | 0.278935 | -2.81838 | 0.005829 | 0.027656 | 1 |
| ENSG0000 response | Inflamed | RP11-3761  | sense_intr chr17 | 41127706 | 41129292 - | 1587  | 2.420048 | 0.434368 | 0.370976 | 0.13165  | 2.817903 | 0.005837 | 0.027689 | 1 |
| ENSG0000 response | Inflamed | MAGED1     | protein_cc chrX  | 51546103 | 51645453 + | 6016  | 6151.752 | 0        | -0.27629 | 0.098064 | -2.8175  | 0.005844 | 0.027717 | 1 |
| ENSG0000 response | Inflamed | PPP1R14C   | protein_cc chr6  | 1.5E+08  | 1.51E+08 + | 2152  | 689.0191 | 0        | 0.486977 | 0.17286  | 2.817169 | 0.005849 | 0.027738 | 1 |
| ENSG0000 response | Inflamed | ADAD2      | protein_cc chr16 | 84224744 | 84230774 + | 4111  | 6.887828 | 0.174224 | -0.50294 | 0.178547 | -2.81685 | 0.005855 | 0.027758 | 1 |
| ENSG0000 response | Inflamed | OGFR       | protein_cc chr20 | 61436187 | 61445352 + | 4702  | 3188.752 | 0        | -0.26561 | 0.09431  | -2.81637 | 0.005863 | 0.027791 | 1 |
| ENSG0000 response | Inflamed | PPP1R14D   | protein_cc chr15 | 41107650 | 41120907 - | 866   | 2135.68  | 0        | 0.65035  | 0.230964 | 2.815805 | 0.005872 | 0.027832 | 1 |
| ENSG0000 response | Inflamed | LRFN2      | protein_cc chr6  | 40359325 | 40555204 - | 3270  | 4.811456 | 0.343675 | 0.509703 | 0.181022 | 2.815691 | 0.005874 | 0.027836 | 1 |
| ENSG0000 response | Inflamed | RNF223     | protein_cc chr1  | 1006346  | 1009687 -  | 1902  | 103.9212 | 0.011933 | 0.47935  | 0.170272 | 2.815196 | 0.005883 | 0.027868 | 1 |
| ENSG0000 response | Inflamed | CDC20P1    | pseudoger chr9   | 89626567 | 89628066 + | 1500  | 25.40095 | 0.071599 | -0.52501 | 0.186497 | -2.81514 | 0.005884 | 0.027868 | 1 |
| ENSG0000 response | Inflamed | MYB        | protein_cc chr6  | 1.36E+08 | 1.36E+08 + | 5486  | 1666.671 | 0        | 0.590656 | 0.209819 | 2.815075 | 0.005885 | 0.027868 | 1 |
| ENSG0000 response | Inflamed | UQCRFS1P   | pseudoger chr22  | 40271293 | 40272119 + | 827   | 50.18854 | 0        | 0.312729 | 0.111092 | 2.815038 | 0.005885 | 0.027868 | 1 |
| ENSG0000 response | Inflamed | AEN        | protein_cc chr15 | 89164527 | 89175513 + | 6018  | 1315.267 | 0        | -0.3031  | 0.107677 | -2.81491 | 0.005888 | 0.027874 | 1 |

|                   |          |           |                  |          |          |   |       |          |          |          |          |          |          |          |   |
|-------------------|----------|-----------|------------------|----------|----------|---|-------|----------|----------|----------|----------|----------|----------|----------|---|
| ENSG0000 response | Inflamed | ZNF823    | protein_cc chr19 | 11832080 | 11849824 | - | 2459  | 269.1098 | 0        | 0.493902 | 0.175473 | 2.814684 | 0.005891 | 0.027887 | 1 |
| ENSG0000 response | Inflamed | TNFSF11   | protein_cc chr13 | 43136872 | 43182149 | + | 2733  | 125.1146 | 0.011933 | -0.86254 | 0.306457 | -2.81457 | 0.005893 | 0.027891 | 1 |
| ENSG0000 response | Inflamed | RP11-4071 | protein_cc chr14 | 39703106 | 39820397 | + | 5392  | 0.799523 | 0.782816 | -0.28725 | 0.102099 | -2.81346 | 0.005912 | 0.027975 | 1 |
| ENSG0000 response | Inflamed | GAREM     | protein_cc chr18 | 29704840 | 30050447 | - | 7568  | 1167.604 | 0        | 0.41388  | 0.147137 | 2.812891 | 0.005922 | 0.028016 | 1 |
| ENSG0000 response | Inflamed | RNA5SP28  | rRNA chr9        | 66458144 | 66458262 | - | 119   | 7.420048 | 0.085919 | -0.45626 | 0.162221 | -2.81256 | 0.005927 | 0.028032 | 1 |
| ENSG0000 response | Inflamed | DPEP3     | protein_cc chr16 | 68009566 | 68014732 | - | 2018  | 21.59666 | 0.011933 | -0.51814 | 0.184225 | -2.81254 | 0.005928 | 0.028032 | 1 |
| ENSG0000 response | Inflamed | SLC36A1   | protein_cc chr5  | 1.51E+08 | 1.51E+08 | + | 6980  | 3069.685 | 0        | 0.435485 | 0.154839 | 2.812494 | 0.005929 | 0.028032 | 1 |
| ENSG0000 response | Inflamed | CCNE1     | protein_cc chr19 | 30302805 | 30315215 | + | 2568  | 241.2411 | 0        | -0.28263 | 0.100496 | -2.81239 | 0.00593  | 0.028036 | 1 |
| ENSG0000 response | Inflamed | AP003068  | pseudoger chr11  | 64941588 | 64943941 | - | 2354  | 46.2506  | 0.009547 | 0.478848 | 0.170279 | 2.812143 | 0.005934 | 0.028051 | 1 |
| ENSG0000 response | Inflamed | TCF3      | protein_cc chr19 | 1609291  | 1652604  | - | 6061  | 4101.621 | 0        | -0.26758 | 0.095155 | -2.81208 | 0.005936 | 0.028051 | 1 |
| ENSG0000 response | Inflamed | IFNG-AS1  | antisense chr12  | 68383225 | 68628466 | + | 2125  | 31.08592 | 0.045346 | -0.75149 | 0.267254 | -2.81188 | 0.005939 | 0.028059 | 1 |
| ENSG0000 response | Inflamed | RP1-35C21 | lincRNA chr1     | 1.77E+08 | 1.77E+08 | + | 491   | 11.47255 | 0.295943 | 0.464642 | 0.165245 | 2.811847 | 0.00594  | 0.028059 | 1 |
| ENSG0000 response | Inflamed | ADAMTS1   | protein_cc chr5  | 1.29E+08 | 1.29E+08 | + | 5408  | 10.31265 | 0.155131 | 0.612104 | 0.21772  | 2.811432 | 0.005947 | 0.028088 | 1 |
| ENSG0000 response | Inflamed | INADL     | protein_cc chr1  | 62208149 | 62629592 | + | 11456 | 1918.893 | 0        | 0.536185 | 0.190735 | 2.811155 | 0.005951 | 0.028105 | 1 |
| ENSG0000 response | Inflamed | PDK4      | protein_cc chr7  | 95212811 | 95225803 | - | 4519  | 1737.038 | 0        | 0.623922 | 0.221973 | 2.810803 | 0.005957 | 0.028127 | 1 |
| ENSG0000 response | Inflamed | AC078899  | pseudoger chr19  | 20368529 | 20370227 | + | 1185  | 8.355609 | 0.085919 | -0.43653 | 0.155309 | -2.8107  | 0.005959 | 0.028127 | 1 |
| ENSG0000 response | Inflamed | RP11-561C | pseudoger chr15  | 85747141 | 85778026 | - | 3193  | 67.86874 | 0.004773 | 0.43516  | 0.154823 | 2.8107   | 0.005959 | 0.028127 | 1 |
| ENSG0000 response | Inflamed | KRT10     | protein_cc chr17 | 38974369 | 38978847 | - | 2124  | 601.389  | 0        | -0.21892 | 0.077892 | -2.81056 | 0.005962 | 0.028133 | 1 |
| ENSG0000 response | Inflamed | SLC6A14   | protein_cc chrX  | 1.16E+08 | 1.16E+08 | + | 4521  | 2098.069 | 0.002387 | -1.22906 | 0.437418 | -2.80981 | 0.005974 | 0.028189 | 1 |
| ENSG0000 response | Inflamed | RP6-91H8  | lincRNA chr14    | 71607842 | 71609970 | - | 2129  | 1.303103 | 0.76611  | -0.37086 | 0.131999 | -2.80953 | 0.005979 | 0.028206 | 1 |
| ENSG0000 response | Inflamed | AHNAK2    | protein_cc chr14 | 1.05E+08 | 1.05E+08 | - | 18771 | 1022.475 | 0        | -0.76411 | 0.272055 | -2.80865 | 0.005994 | 0.028272 | 1 |
| ENSG0000 response | Inflamed | SDR42E1   | protein_cc chr16 | 82031221 | 82045093 | - | 3150  | 271.5561 | 0        | 0.416344 | 0.14824  | 2.808578 | 0.005996 | 0.028273 | 1 |
| ENSG0000 response | Inflamed | DTX3      | protein_cc chr12 | 57998405 | 58003587 | + | 4087  | 688.6993 | 0        | -0.44189 | 0.157341 | -2.80851 | 0.005997 | 0.028274 | 1 |
| ENSG0000 response | Inflamed | SPOCK1    | protein_cc chr5  | 1.36E+08 | 1.37E+08 | - | 6174  | 262.4248 | 0.004773 | -0.71476 | 0.25451  | -2.80839 | 0.005999 | 0.028278 | 1 |
| ENSG0000 response | Inflamed | C2orf61   | protein_cc chr2  | 47272677 | 47382517 | - | 3273  | 17.44869 | 0.181384 | 0.711475 | 0.253375 | 2.807993 | 0.006006 | 0.028304 | 1 |
| ENSG0000 response | Inflamed | ZNF154    | protein_cc chr19 | 58208735 | 58220579 | - | 5822  | 211.3103 | 0.011933 | -0.69105 | 0.246105 | -2.80795 | 0.006006 | 0.028304 | 1 |
| ENSG0000 response | Inflamed | NFATC4    | protein_cc chr14 | 24834879 | 24848810 | + | 8437  | 1112.47  | 0        | -0.47057 | 0.167594 | -2.80783 | 0.006009 | 0.028309 | 1 |
| ENSG0000 response | Inflamed | ALPK3     | protein_cc chr15 | 85359911 | 85416713 | + | 10940 | 448.3628 | 0.002387 | -0.7063  | 0.251572 | -2.80756 | 0.006013 | 0.028326 | 1 |
| ENSG0000 response | Inflamed | CGN       | protein_cc chr1  | 1.51E+08 | 1.52E+08 | + | 6616  | 10766.84 | 0        | 0.685469 | 0.244164 | 2.807413 | 0.006016 | 0.028333 | 1 |
| ENSG0000 response | Inflamed | RP11-6351 | antisense chr18  | 61034561 | 61048862 | + | 785   | 19.31504 | 0.002387 | -0.33057 | 0.117769 | -2.80696 | 0.006023 | 0.028364 | 1 |
| ENSG0000 response | Inflamed | TRBV28    | TR_V_gene chr7   | 1.42E+08 | 1.42E+08 | + | 364   | 32.6611  | 0.038186 | -0.59445 | 0.211831 | -2.80623 | 0.006036 | 0.028418 | 1 |
| ENSG0000 response | Inflamed | SCAMP3    | protein_cc chr1  | 1.55E+08 | 1.55E+08 | - | 2442  | 2112.224 | 0        | -0.16711 | 0.059551 | -2.80612 | 0.006038 | 0.028418 | 1 |
| ENSG0000 response | Inflamed | RP11-4931 | pseudoger chr12  | 47735397 | 47735872 | - | 476   | 0.983294 | 0.763723 | -0.32801 | 0.116893 | -2.80606 | 0.006039 | 0.028418 | 1 |
| ENSG0000 response | Inflamed | USH1G     | protein_cc chr17 | 72912176 | 72919351 | - | 3561  | 5.124105 | 0.405728 | 0.605412 | 0.215752 | 2.806054 | 0.006039 | 0.028418 | 1 |
| ENSG0000 response | Inflamed | SCARA3    | protein_cc chr8  | 27491385 | 27534293 | + | 4031  | 1261.348 | 0        | -0.54751 | 0.195122 | -2.80599 | 0.00604  | 0.028418 | 1 |
| ENSG0000 response | Inflamed | ZAP70     | protein_cc chr2  | 98330023 | 98356325 | + | 5111  | 830.6706 | 0        | -0.54401 | 0.193886 | -2.80583 | 0.006043 | 0.028418 | 1 |
| ENSG0000 response | Inflamed | CTD-3187  | pseudoger chr19  | 51641227 | 51641891 | + | 421   | 1.763723 | 0.637232 | -0.39829 | 0.141952 | -2.80581 | 0.006044 | 0.028418 | 1 |
| ENSG0000 response | Inflamed | RP1-2801  | antisense chr1   | 2.1E+08  | 2.1E+08  | - | 477   | 4.210024 | 0.243437 | -0.43929 | 0.156566 | -2.8058  | 0.006044 | 0.028418 | 1 |
| ENSG0000 response | Inflamed | SPRYD7    | protein_cc chr13 | 50486842 | 50510626 | - | 3340  | 458.4224 | 0        | 0.275972 | 0.098373 | 2.805362 | 0.006051 | 0.028449 | 1 |
| ENSG0000 response | Inflamed | AKT3      | protein_cc chr1  | 2.44E+08 | 2.44E+08 | - | 7499  | 552.6253 | 0        | -0.57159 | 0.203762 | -2.80518 | 0.006054 | 0.028459 | 1 |

|                   |          |           |                  |          |          |   |       |          |          |          |          |          |          |          |   |
|-------------------|----------|-----------|------------------|----------|----------|---|-------|----------|----------|----------|----------|----------|----------|----------|---|
| ENSG0000 response | Inflamed | COX7C     | protein_cc chr5  | 85913721 | 85916779 | + | 1993  | 5311.126 | 0        | 0.351049 | 0.125164 | 2.804717 | 0.006062 | 0.028492 | 1 |
| ENSG0000 response | Inflamed | MT-TQ     | Mt_tRNA chrM     | 4329     | 4400     | - | 72    | 54.83771 | 0.009547 | 0.445871 | 0.158989 | 2.804423 | 0.006068 | 0.028508 | 1 |
| ENSG0000 response | Inflamed | CYGB      | protein_cc chr17 | 74523438 | 74547257 | - | 2949  | 2611.375 | 0        | -0.39527 | 0.140946 | -2.80439 | 0.006068 | 0.028508 | 1 |
| ENSG0000 response | Inflamed | CTD-2587  | lincRNA chr19    | 55728028 | 55732984 | + | 1577  | 4.954654 | 0.24105  | 0.457047 | 0.162992 | 2.804113 | 0.006073 | 0.028524 | 1 |
| ENSG0000 response | Inflamed | RP11-480  | lincRNA chr1     | 2.03E+08 | 2.03E+08 | + | 2321  | 8.22673  | 0.155131 | 0.46006  | 0.164068 | 2.804074 | 0.006074 | 0.028524 | 1 |
| ENSG0000 response | Inflamed | SLC9A7    | protein_cc chrX  | 46464753 | 46618490 | - | 3838  | 132.7613 | 0.004773 | -0.4822  | 0.17199  | -2.80367 | 0.006081 | 0.028551 | 1 |
| ENSG0000 response | Inflamed | GEMIN8P4  | pseudoger chr1   | 90459152 | 90459880 | - | 729   | 24.97852 | 0.002387 | 0.38958  | 0.138956 | 2.803616 | 0.006082 | 0.028551 | 1 |
| ENSG0000 response | Inflamed | RP6-159A1 | pseudoger chrX   | 65176131 | 65177038 | - | 908   | 3.109785 | 0.25537  | -0.33963 | 0.121143 | -2.80351 | 0.006083 | 0.028555 | 1 |
| ENSG0000 response | Inflamed | SPATC1L   | protein_cc chr21 | 47581062 | 47604390 | - | 2333  | 228.2792 | 0        | -0.35434 | 0.12643  | -2.80263 | 0.006099 | 0.028621 | 1 |
| ENSG0000 response | Inflamed | HLA-DPB1  | protein_cc chr6  | 33043703 | 33054978 | + | 2862  | 7398.523 | 0        | -0.40194 | 0.143463 | -2.80168 | 0.006115 | 0.028695 | 1 |
| ENSG0000 response | Inflamed | TBC1D22B  | protein_cc chr6  | 37225548 | 37300746 | + | 3462  | 926.5298 | 0        | 0.217272 | 0.077553 | 2.801609 | 0.006117 | 0.028695 | 1 |
| ENSG0000 response | Inflamed | RP11-616  | antisense chr16  | 1256560  | 1257124  | - | 338   | 14.7852  | 0.136038 | 0.637342 | 0.227503 | 2.801468 | 0.006119 | 0.0287   | 1 |
| ENSG0000 response | Inflamed | DUSP5     | protein_cc chr10 | 1.12E+08 | 1.12E+08 | + | 2615  | 1963.702 | 0        | -0.47452 | 0.169385 | -2.80143 | 0.00612  | 0.0287   | 1 |
| ENSG0000 response | Inflamed | SRPK3     | protein_cc chrX  | 1.53E+08 | 1.53E+08 | + | 4744  | 52.98568 | 0        | 0.466196 | 0.166418 | 2.801345 | 0.006121 | 0.0287   | 1 |
| ENSG0000 response | Inflamed | GLYATL3   | protein_cc chr6  | 49467671 | 49494760 | + | 1124  | 1.880668 | 0.649165 | 0.393221 | 0.140371 | 2.801302 | 0.006122 | 0.0287   | 1 |
| ENSG0000 response | Inflamed | ABHD14A   | protein_cc chr3  | 52005442 | 52015212 | + | 2309  | 228.5442 | 0        | -0.3024  | 0.10796  | -2.80105 | 0.006126 | 0.028715 | 1 |
| ENSG0000 response | Inflamed | AC040977  | protein_cc chr17 | 6915928  | 6917755  | - | 522   | 5.630072 | 0.131265 | -0.44927 | 0.160418 | -2.80065 | 0.006134 | 0.028744 | 1 |
| ENSG0000 response | Inflamed | ADRBK2    | protein_cc chr22 | 25960816 | 26125261 | + | 9153  | 655.358  | 0        | -0.5297  | 0.189138 | -2.80059 | 0.006135 | 0.028744 | 1 |
| ENSG0000 response | Inflamed | CTD-2184  | antisense chr15  | 52348872 | 52392720 | - | 635   | 0.899761 | 0.792363 | -0.34029 | 0.121529 | -2.80005 | 0.006144 | 0.028783 | 1 |
| ENSG0000 response | Inflamed | CTD-2385  | antisense chr16  | 23723311 | 23724114 | + | 534   | 4.670644 | 0.183771 | 0.4026   | 0.143807 | 2.799581 | 0.006152 | 0.028816 | 1 |
| ENSG0000 response | Inflamed | LRWD1     | protein_cc chr7  | 1.02E+08 | 1.02E+08 | + | 5926  | 948.2458 | 0        | -0.2302  | 0.082229 | -2.79952 | 0.006153 | 0.028816 | 1 |
| ENSG0000 response | Inflamed | SAMD12    | protein_cc chr8  | 1.19E+08 | 1.2E+08  | - | 10756 | 611.821  | 0        | 0.553385 | 0.197686 | 2.799318 | 0.006157 | 0.028828 | 1 |
| ENSG0000 response | Inflamed | TSHZ1     | protein_cc chr18 | 72922710 | 73001905 | + | 8281  | 1362.632 | 0        | 0.392735 | 0.140341 | 2.798429 | 0.006173 | 0.028896 | 1 |
| ENSG0000 response | Inflamed | HSCB      | protein_cc chr22 | 29138019 | 29153503 | + | 1462  | 204.4057 | 0        | -0.25473 | 0.091044 | -2.79793 | 0.006182 | 0.028932 | 1 |
| ENSG0000 response | Inflamed | LRR4B     | protein_cc chr19 | 51020149 | 51071302 | - | 3121  | 138.2458 | 0.004773 | -0.55899 | 0.199808 | -2.79766 | 0.006186 | 0.028947 | 1 |
| ENSG0000 response | Inflamed | KRT6C     | protein_cc chr12 | 52862300 | 52867569 | - | 2896  | 4.307876 | 0.637232 | -0.71121 | 0.254219 | -2.79763 | 0.006187 | 0.028947 | 1 |
| ENSG0000 response | Inflamed | ZBTB42    | protein_cc chr14 | 1.05E+08 | 1.05E+08 | + | 3905  | 706.7041 | 0        | 0.23107  | 0.082617 | 2.79689  | 0.0062   | 0.029003 | 1 |
| ENSG0000 response | Inflamed | ACTN3     | polymorpt chr11  | 66313866 | 66330800 | + | 3517  | 6.121718 | 0.25537  | -0.54736 | 0.195739 | -2.79636 | 0.006209 | 0.029042 | 1 |
| ENSG0000 response | Inflamed | GCSAM     | protein_cc chr3  | 1.12E+08 | 1.12E+08 | - | 3783  | 102.2243 | 0.00716  | -0.64044 | 0.229042 | -2.79618 | 0.006213 | 0.029052 | 1 |
| ENSG0000 response | Inflamed | CAMK1     | protein_cc chr3  | 9799026  | 9811676  | - | 2720  | 511.4439 | 0        | -0.28284 | 0.101156 | -2.79602 | 0.006215 | 0.02906  | 1 |
| ENSG0000 response | Inflamed | TRAK1     | protein_cc chr3  | 42055294 | 42267381 | + | 10992 | 5640.623 | 0        | 0.324615 | 0.116111 | 2.795732 | 0.006221 | 0.029079 | 1 |
| ENSG0000 response | Inflamed | AL122127  | miRNA chr14      | 1.06E+08 | 1.06E+08 | - | 70    | 30.69451 | 0.083532 | -0.7886  | 0.282081 | -2.79566 | 0.006222 | 0.02908  | 1 |
| ENSG0000 response | Inflamed | DCTD      | protein_cc chr4  | 1.84E+08 | 1.84E+08 | - | 3466  | 1971.033 | 0        | -0.184   | 0.065821 | -2.7955  | 0.006225 | 0.029087 | 1 |
| ENSG0000 response | Inflamed | IBA57     | protein_cc chr1  | 2.28E+08 | 2.28E+08 | + | 10219 | 853.6134 | 0        | 0.203559 | 0.072818 | 2.795456 | 0.006226 | 0.029087 | 1 |
| ENSG0000 response | Inflamed | HOX3      | protein_cc chr7  | 27145803 | 27192200 | - | 4306  | 551.6945 | 0        | 0.528935 | 0.189238 | 2.795083 | 0.006232 | 0.029112 | 1 |
| ENSG0000 response | Inflamed | RP11-888  | lincRNA chr18    | 9315192  | 9334439  | - | 466   | 6.310263 | 0.138425 | -0.41903 | 0.149937 | -2.7947  | 0.006239 | 0.029134 | 1 |
| ENSG0000 response | Inflamed | GPX1P1    | pseudoger chrX   | 13396854 | 13397459 | - | 606   | 146.6802 | 0.042959 | -0.44377 | 0.15879  | -2.79466 | 0.00624  | 0.029134 | 1 |
| ENSG0000 response | Inflamed | MTRNR2L5  | protein_cc chr6  | 62284008 | 62284534 | + | 527   | 4.396181 | 0.293556 | 0.416955 | 0.149199 | 2.794634 | 0.00624  | 0.029134 | 1 |
| ENSG0000 response | Inflamed | TULP3     | protein_cc chr12 | 2986389  | 3050306  | + | 3181  | 702.1313 | 0        | -0.29777 | 0.106556 | -2.79449 | 0.006243 | 0.029141 | 1 |
| ENSG0000 response | Inflamed | COX6B2    | protein_cc chr19 | 55860674 | 55866182 | - | 3815  | 245.9857 | 0.002387 | 0.559927 | 0.200393 | 2.794144 | 0.006249 | 0.029165 | 1 |

|                   |          |           |                  |          |          |   |      |          |          |          |          |          |          |          |   |
|-------------------|----------|-----------|------------------|----------|----------|---|------|----------|----------|----------|----------|----------|----------|----------|---|
| ENSG0000 response | Inflamed | RP4-583P1 | antisense chr20  | 62376042 | 62377311 | + | 471  | 3.064439 | 0.398568 | -0.39573 | 0.14164  | -2.79389 | 0.006253 | 0.029181 | 1 |
| ENSG0000 response | Inflamed | SYT15     | protein_cc chr10 | 46955444 | 46971400 | - | 7158 | 144.0549 | 0.00716  | -0.60442 | 0.21636  | -2.79359 | 0.006259 | 0.0292   | 1 |
| ENSG0000 response | Inflamed | CLDN1     | protein_cc chr3  | 1.9E+08  | 1.9E+08  | - | 3663 | 406.5871 | 0.004773 | -0.81827 | 0.292931 | -2.79337 | 0.006263 | 0.029208 | 1 |
| ENSG0000 response | Inflamed | SLC3A1    | protein_cc chr2  | 44502599 | 44548633 | + | 6532 | 815.5871 | 0.004773 | 1.079977 | 0.386626 | 2.793342 | 0.006263 | 0.029208 | 1 |
| ENSG0000 response | Inflamed | C16orf95  | protein_cc chr16 | 87117168 | 87351022 | - | 3069 | 16.96181 | 0.004773 | -0.27827 | 0.099622 | -2.79329 | 0.006264 | 0.029208 | 1 |
| ENSG0000 response | Inflamed | HSD3B1    | protein_cc chr1  | 1.2E+08  | 1.2E+08  | + | 2447 | 14.34606 | 0.355609 | 0.741772 | 0.265558 | 2.793262 | 0.006265 | 0.029208 | 1 |
| ENSG0000 response | Inflamed | NXPE1     | protein_cc chr11 | 1.14E+08 | 1.14E+08 | - | 4317 | 2923.804 | 0.004773 | 1.160159 | 0.41545  | 2.792536 | 0.006278 | 0.029263 | 1 |
| ENSG0000 response | Inflamed | FCRL2     | protein_cc chr1  | 1.58E+08 | 1.58E+08 | - | 5058 | 416.4081 | 0        | -0.83823 | 0.300282 | -2.79147 | 0.006297 | 0.029347 | 1 |
| ENSG0000 response | Inflamed | MS4A1     | protein_cc chr11 | 60223225 | 60238233 | + | 4872 | 1141.709 | 0.00716  | -1.16875 | 0.418705 | -2.79134 | 0.006299 | 0.029353 | 1 |
| ENSG0000 response | Inflamed | RN7SL842l | misc_RNA chr19   | 14699169 | 14699465 | + | 297  | 1.181384 | 0.768496 | -0.31388 | 0.112452 | -2.79121 | 0.006302 | 0.029359 | 1 |
| ENSG0000 response | Inflamed | RP11-356l | antisense chr6   | 1.38E+08 | 1.38E+08 | - | 4088 | 65.21718 | 0.00716  | -0.49252 | 0.176503 | -2.79044 | 0.006316 | 0.029418 | 1 |
| ENSG0000 response | Inflamed | RP11-355F | antisense chr2   | 75381492 | 75417075 | + | 3438 | 8.806683 | 0.145585 | -0.56997 | 0.204279 | -2.79018 | 0.00632  | 0.029435 | 1 |
| ENSG0000 response | Inflamed | POU3F1    | protein_cc chr1  | 38509523 | 38512450 | - | 2928 | 10.28878 | 0.200477 | -0.63639 | 0.228106 | -2.78989 | 0.006326 | 0.029454 | 1 |
| ENSG0000 response | Inflamed | CSNK1E    | protein_cc chr22 | 38686697 | 38794527 | - | 6699 | 4358.005 | 0        | -0.25712 | 0.092164 | -2.78977 | 0.006328 | 0.029455 | 1 |
| ENSG0000 response | Inflamed | ZEB1      | protein_cc chr10 | 31607424 | 31818742 | + | 8561 | 504.0215 | 0.002387 | -0.59561 | 0.213499 | -2.78975 | 0.006328 | 0.029455 | 1 |
| ENSG0000 response | Inflamed | KCNS1     | protein_cc chr20 | 43720951 | 43729753 | - | 4538 | 15.09785 | 0.119332 | -0.71211 | 0.25528  | -2.78953 | 0.006332 | 0.029469 | 1 |
| ENSG0000 response | Inflamed | SEMA3E    | protein_cc chr7  | 82993222 | 83278326 | - | 6748 | 19.59189 | 0.095465 | 0.703311 | 0.252196 | 2.788748 | 0.006346 | 0.029529 | 1 |
| ENSG0000 response | Inflamed | AP000487  | antisense chr11  | 70218352 | 70244594 | - | 3078 | 8.522673 | 0.033413 | 0.348218 | 0.124871 | 2.788633 | 0.006348 | 0.029534 | 1 |
| ENSG0000 response | Inflamed | RP1-212Gf | antisense chrX   | 47518232 | 47519776 | + | 1545 | 11.86874 | 0.042959 | 0.333485 | 0.119613 | 2.788024 | 0.006359 | 0.02958  | 1 |
| ENSG0000 response | Inflamed | RP11-376f | pseudoger chr1   | 84810361 | 84815622 | + | 905  | 1.945107 | 0.546539 | 0.37052  | 0.132903 | 2.787905 | 0.006362 | 0.029581 | 1 |
| ENSG0000 response | Inflamed | LAMB2     | protein_cc chr3  | 49158547 | 49170551 | - | 6865 | 5251.592 | 0        | -0.52645 | 0.188833 | -2.78789 | 0.006362 | 0.029581 | 1 |
| ENSG0000 response | Inflamed | CPT1A     | protein_cc chr11 | 68522088 | 68611878 | - | 6565 | 11477.06 | 0        | 0.383827 | 0.137704 | 2.787324 | 0.006372 | 0.029624 | 1 |
| ENSG0000 response | Inflamed | CYTL1     | protein_cc chr4  | 5016313  | 5021199  | - | 1003 | 49.96181 | 0        | -0.52913 | 0.189852 | -2.78707 | 0.006377 | 0.02964  | 1 |
| ENSG0000 response | Inflamed | RP11-566k | processed_chr16  | 89972565 | 89984641 | + | 559  | 3.842482 | 0.293556 | -0.44661 | 0.160273 | -2.78655 | 0.006386 | 0.029679 | 1 |
| ENSG0000 response | Inflamed | RP11-731l | lincRNA chr4     | 1.52E+08 | 1.52E+08 | - | 540  | 10.88067 | 0.124105 | 0.509485 | 0.182845 | 2.786428 | 0.006388 | 0.029684 | 1 |
| ENSG0000 response | Inflamed | C16orf71  | protein_cc chr16 | 4784273  | 4799397  | + | 3977 | 16.4105  | 0.00716  | -0.29276 | 0.105069 | -2.78634 | 0.00639  | 0.029684 | 1 |
| ENSG0000 response | Inflamed | TSPAN7    | protein_cc chrX  | 38420623 | 38548169 | + | 3105 | 1792.566 | 0        | 0.425534 | 0.152724 | 2.786299 | 0.006391 | 0.029684 | 1 |
| ENSG0000 response | Inflamed | CTC-459l6 | antisense chr5   | 80243516 | 80256726 | - | 1166 | 2.756563 | 0.420048 | -0.39427 | 0.141531 | -2.78572 | 0.006401 | 0.029722 | 1 |
| ENSG0000 response | Inflamed | CTD-2134f | lincRNA chr14    | 1.04E+08 | 1.04E+08 | - | 582  | 6.587112 | 0.140811 | 0.436611 | 0.156734 | 2.785689 | 0.006402 | 0.029722 | 1 |
| ENSG0000 response | Inflamed | ACTBP1    | pseudoger chrX   | 46147451 | 46148563 | - | 1113 | 1.916468 | 0.644391 | -0.48342 | 0.173538 | -2.78566 | 0.006402 | 0.029722 | 1 |
| ENSG0000 response | Inflamed | AC011298  | lincRNA chr2     | 2.42E+08 | 2.42E+08 | + | 3398 | 48.56563 | 0.042959 | 0.853706 | 0.306486 | 2.785462 | 0.006406 | 0.029732 | 1 |
| ENSG0000 response | Inflamed | DAB2IP    | protein_cc chr9  | 1.24E+08 | 1.25E+08 | + | 8408 | 8616.451 | 0        | 0.359895 | 0.129206 | 2.785434 | 0.006407 | 0.029732 | 1 |
| ENSG0000 response | Inflamed | TMEM229   | protein_cc chr14 | 67913801 | 68000456 | - | 6377 | 1109.291 | 0        | 0.316936 | 0.113804 | 2.784939 | 0.006416 | 0.029768 | 1 |
| ENSG0000 response | Inflamed | GGT7      | protein_cc chr20 | 33432523 | 33460663 | - | 2966 | 1024.647 | 0        | 0.349724 | 0.125589 | 2.784673 | 0.006421 | 0.029786 | 1 |
| ENSG0000 response | Inflamed | TMEM200   | protein_cc chr1  | 29445940 | 29450447 | - | 2639 | 279.2148 | 0        | -0.5256  | 0.188758 | -2.78454 | 0.006423 | 0.029792 | 1 |
| ENSG0000 response | Inflamed | IGHV1OR1  | IG_V_pseu chr15  | 22466058 | 22466493 | - | 351  | 151.9737 | 0.064439 | -0.9632  | 0.346137 | -2.78273 | 0.006456 | 0.029941 | 1 |
| ENSG0000 response | Inflamed | LRRC19    | protein_cc chr9  | 26993134 | 27005691 | - | 3609 | 1371.594 | 0.004773 | 0.897062 | 0.322412 | 2.782351 | 0.006463 | 0.029963 | 1 |
| ENSG0000 response | Inflamed | CTD-2026c | pseudoger chr2   | 57982563 | 57993187 | + | 1701 | 23.43437 | 0.064439 | -0.74367 | 0.267281 | -2.78235 | 0.006463 | 0.029963 | 1 |
| ENSG0000 response | Inflamed | KRT17P1   | pseudoger chr17  | 16744057 | 16749197 | - | 2431 | 1.183771 | 0.770883 | -0.3571  | 0.128375 | -2.78167 | 0.006476 | 0.030016 | 1 |
| ENSG0000 response | Inflamed | HS3ST5    | protein_cc chr6  | 1.14E+08 | 1.15E+08 | - | 4104 | 1.53222  | 0.661098 | 0.400177 | 0.14387  | 2.781517 | 0.006479 | 0.030023 | 1 |

|                   |          |           |                  |          |          |   |       |          |          |          |          |          |          |          |   |
|-------------------|----------|-----------|------------------|----------|----------|---|-------|----------|----------|----------|----------|----------|----------|----------|---|
| ENSG0000 response | Inflamed | ACY3      | protein_cc chr11 | 67410026 | 67418130 | - | 1300  | 513.4558 | 0        | 0.494941 | 0.17795  | 2.781342 | 0.006482 | 0.030033 | 1 |
| ENSG0000 response | Inflamed | PDXDC1    | protein_cc chr16 | 15068448 | 15233196 | + | 8908  | 10527.02 | 0        | 0.334043 | 0.120105 | 2.78127  | 0.006483 | 0.030034 | 1 |
| ENSG0000 response | Inflamed | DHFRP1    | pseudoger chr18  | 23749724 | 23751313 | - | 1590  | 3.171838 | 0.27685  | 0.342412 | 0.123117 | 2.781202 | 0.006484 | 0.030035 | 1 |
| ENSG0000 response | Inflamed | HHIP      | protein_cc chr4  | 1.46E+08 | 1.46E+08 | + | 12074 | 459.043  | 0.004773 | 0.832004 | 0.299165 | 2.781087 | 0.006487 | 0.030039 | 1 |
| ENSG0000 response | Inflamed | CD164     | protein_cc chr6  | 1.1E+08  | 1.1E+08  | - | 6944  | 14310.18 | 0        | 0.418985 | 0.150664 | 2.780928 | 0.00649  | 0.030047 | 1 |
| ENSG0000 response | Inflamed | CMAS      | protein_cc chr12 | 22199108 | 22218608 | + | 2018  | 2442.074 | 0        | 0.414561 | 0.149087 | 2.78067  | 0.006494 | 0.030063 | 1 |
| ENSG0000 response | Inflamed | AC002398  | lincRNA chr19    | 36279778 | 36288787 | - | 2488  | 3.136038 | 0.396181 | -0.45568 | 0.16388  | -2.7806  | 0.006496 | 0.030063 | 1 |
| ENSG0000 response | Inflamed | RP11-7601 | lincRNA chr8     | 1.21E+08 | 1.21E+08 | + | 752   | 27.79475 | 0.0358   | 0.531816 | 0.191262 | 2.780562 | 0.006496 | 0.030063 | 1 |
| ENSG0000 response | Inflamed | TSPAN1    | protein_cc chr1  | 46640745 | 46651630 | + | 2366  | 36408.76 | 0        | 0.663672 | 0.238693 | 2.780448 | 0.006498 | 0.030067 | 1 |
| ENSG0000 response | Inflamed | PROCA1    | protein_cc chr17 | 27030215 | 27038872 | - | 4829  | 94.06921 | 0        | -0.46227 | 0.166265 | -2.78031 | 0.006501 | 0.03007  | 1 |
| ENSG0000 response | Inflamed | CDH1      | protein_cc chr16 | 68771128 | 68869451 | + | 6154  | 27549.09 | 0        | 0.57127  | 0.205471 | 2.780296 | 0.006501 | 0.03007  | 1 |
| ENSG0000 response | Inflamed | SH3GLB2   | protein_cc chr9  | 1.32E+08 | 1.32E+08 | - | 6814  | 4765.236 | 0        | 0.222367 | 0.080004 | 2.779432 | 0.006517 | 0.030139 | 1 |
| ENSG0000 response | Inflamed | LINC00942 | lincRNA chr12    | 1609691  | 1616484  | - | 2417  | 2.145585 | 0.553699 | 0.426035 | 0.153302 | 2.779056 | 0.006524 | 0.030166 | 1 |
| ENSG0000 response | Inflamed | RP11-170L | pseudoger chr16  | 31973384 | 31985682 | + | 513   | 3.918854 | 0.420048 | -0.46796 | 0.168399 | -2.77889 | 0.006527 | 0.030174 | 1 |
| ENSG0000 response | Inflamed | TMEM54    | protein_cc chr1  | 33360195 | 33367039 | - | 1417  | 13585.88 | 0        | 0.49009  | 0.176366 | 2.778834 | 0.006528 | 0.030174 | 1 |
| ENSG0000 response | Inflamed | RP11-1025 | lincRNA chr14    | 1.02E+08 | 1.02E+08 | - | 454   | 9.050119 | 0.155131 | -0.48494 | 0.174522 | -2.77869 | 0.006531 | 0.030182 | 1 |
| ENSG0000 response | Inflamed | CST2      | protein_cc chr20 | 23804406 | 23807368 | - | 748   | 2.069212 | 0.615752 | -0.47446 | 0.170758 | -2.77858 | 0.006533 | 0.030185 | 1 |
| ENSG0000 response | Inflamed | RUNX1     | protein_cc chr21 | 36160098 | 37376965 | - | 15574 | 2543.671 | 0        | -0.40527 | 0.145879 | -2.7781  | 0.006542 | 0.030221 | 1 |
| ENSG0000 response | Inflamed | HS3ST6    | protein_cc chr16 | 1961464  | 1968441  | - | 1273  | 12.05012 | 0.544153 | 0.684296 | 0.246343 | 2.777822 | 0.006547 | 0.03024  | 1 |
| ENSG0000 response | Inflamed | RP11-863F | lincRNA chr16    | 88210904 | 88219696 | - | 1526  | 24.13365 | 0.026253 | -0.71963 | 0.259067 | -2.77777 | 0.006548 | 0.03024  | 1 |
| ENSG0000 response | Inflamed | RP11-219E | lincRNA chr14    | 21366144 | 21404414 | - | 351   | 3.718377 | 0.587112 | 0.400512 | 0.144239 | 2.77673  | 0.006568 | 0.030324 | 1 |
| ENSG0000 response | Inflamed | TMEM80    | protein_cc chr11 | 695428   | 705028   | + | 4071  | 859.9594 | 0        | 0.249231 | 0.089766 | 2.776445 | 0.006573 | 0.030343 | 1 |
| ENSG0000 response | Inflamed | NSUN7     | protein_cc chr4  | 40751914 | 40812002 | + | 4728  | 251.358  | 0        | 0.398947 | 0.143748 | 2.775327 | 0.006594 | 0.030435 | 1 |
| ENSG0000 response | Inflamed | RP11-2501 | pseudoger chr9   | 69475237 | 69475614 | + | 378   | 5.704057 | 0.422434 | 0.519043 | 0.187042 | 2.775015 | 0.0066   | 0.030456 | 1 |
| ENSG0000 response | Inflamed | MYO15B    | protein_cc chr17 | 73584139 | 73622929 | + | 12862 | 15764.55 | 0        | 0.497952 | 0.179462 | 2.774699 | 0.006606 | 0.030479 | 1 |
| ENSG0000 response | Inflamed | EFNB1     | protein_cc chrX  | 68048840 | 68061990 | + | 3314  | 5231.258 | 0        | 0.294665 | 0.106202 | 2.774563 | 0.006608 | 0.030479 | 1 |
| ENSG0000 response | Inflamed | CTD-30641 | antisense chr8   | 1.42E+08 | 1.42E+08 | + | 2961  | 12.05489 | 0.178998 | -0.67844 | 0.24452  | -2.77456 | 0.006608 | 0.030479 | 1 |
| ENSG0000 response | Inflamed | BEND7     | protein_cc chr10 | 13480484 | 13570974 | - | 9815  | 719.2291 | 0        | 0.432383 | 0.155842 | 2.774504 | 0.006609 | 0.030479 | 1 |
| ENSG0000 response | Inflamed | C12orf77  | protein_cc chr12 | 25146358 | 25150453 | - | 2474  | 1.75179  | 0.656325 | -0.40814 | 0.147121 | -2.77416 | 0.006616 | 0.030502 | 1 |
| ENSG0000 response | Inflamed | LRIG3     | protein_cc chr12 | 59265931 | 59314303 | - | 5893  | 1338.444 | 0        | 0.478987 | 0.172663 | 2.77412  | 0.006617 | 0.030502 | 1 |
| ENSG0000 response | Inflamed | SLC6A16   | protein_cc chr19 | 49792895 | 49828482 | - | 3599  | 50.25298 | 0.009547 | -0.55344 | 0.19951  | -2.77398 | 0.006619 | 0.030509 | 1 |
| ENSG0000 response | Inflamed | TAGLN2    | protein_cc chr1  | 1.6E+08  | 1.6E+08  | - | 2487  | 16930.16 | 0        | -0.20881 | 0.075287 | -2.77357 | 0.006627 | 0.030539 | 1 |
| ENSG0000 response | Inflamed | DHCR24    | protein_cc chr1  | 55315306 | 55352891 | - | 4441  | 13627.86 | 0        | 0.420856 | 0.151759 | 2.773176 | 0.006635 | 0.030568 | 1 |
| ENSG0000 response | Inflamed | NRBP1     | protein_cc chr2  | 27650657 | 27665126 | + | 5329  | 3964.487 | 0        | -0.15558 | 0.056106 | -2.77304 | 0.006637 | 0.030573 | 1 |
| ENSG0000 response | Inflamed | LGALS9B   | protein_cc chr17 | 20352708 | 20370852 | - | 2670  | 499.9475 | 0        | 0.699277 | 0.252174 | 2.772997 | 0.006638 | 0.030573 | 1 |
| ENSG0000 response | Inflamed | LYPD5     | protein_cc chr19 | 44300081 | 44331358 | - | 5091  | 314.5298 | 0        | -0.62985 | 0.227144 | -2.77291 | 0.00664  | 0.030575 | 1 |
| ENSG0000 response | Inflamed | RNF213    | protein_cc chr17 | 78234665 | 78372586 | + | 28570 | 18573.21 | 0        | -0.4436  | 0.159999 | -2.77253 | 0.006647 | 0.030603 | 1 |
| ENSG0000 response | Inflamed | TFEC      | protein_cc chr7  | 1.16E+08 | 1.16E+08 | - | 8644  | 184.7613 | 0        | -0.64058 | 0.231073 | -2.77219 | 0.006653 | 0.030627 | 1 |
| ENSG0000 response | Inflamed | CEBPG     | protein_cc chr19 | 33864236 | 33873592 | + | 4411  | 2857.308 | 0        | 0.390999 | 0.141049 | 2.77208  | 0.006655 | 0.030627 | 1 |
| ENSG0000 response | Inflamed | C12orf79  | protein_cc chr12 | 92378756 | 92536690 | - | 3638  | 18.54177 | 0.026253 | -0.47411 | 0.171033 | -2.77207 | 0.006655 | 0.030627 | 1 |



|                   |          |            |            |       |          |          |   |       |          |          |          |          |          |          |          |   |
|-------------------|----------|------------|------------|-------|----------|----------|---|-------|----------|----------|----------|----------|----------|----------|----------|---|
| ENSG0000 response | Inflamed | SNHG9      | lincRNA    | chr16 | 2014960  | 2015510  | + | 551   | 115.4988 | 0        | -0.33396 | 0.120477 | -2.77195 | 0.006658 | 0.030632 | 1 |
| ENSG0000 response | Inflamed | C4BPB      | protein_cc | chr1  | 2.07E+08 | 2.07E+08 | + | 3219  | 772.3317 | 0.002387 | -0.99092 | 0.357502 | -2.7718  | 0.006661 | 0.030636 | 1 |
| ENSG0000 response | Inflamed | CILP2      | protein_cc | chr19 | 19649057 | 19657468 | + | 4360  | 22.08592 | 0.047733 | -0.69022 | 0.249017 | -2.77179 | 0.006661 | 0.030636 | 1 |
| ENSG0000 response | Inflamed | RIMBP2     | protein_cc | chr12 | 1.31E+08 | 1.31E+08 | - | 8738  | 129.0263 | 0.019093 | 0.641171 | 0.231339 | 2.771561 | 0.006665 | 0.03065  | 1 |
| ENSG0000 response | Inflamed | SGSM3      | protein_cc | chr22 | 40766595 | 40806293 | + | 4770  | 5680.146 | 0        | 0.216659 | 0.078175 | 2.771467 | 0.006667 | 0.030651 | 1 |
| ENSG0000 response | Inflamed | ALDH5A1    | protein_cc | chr6  | 24495080 | 24537435 | + | 5525  | 944.6897 | 0        | 0.411145 | 0.148351 | 2.771426 | 0.006668 | 0.030651 | 1 |
| ENSG0000 response | Inflamed | MAGED4     | protein_cc | chrX  | 51927919 | 51935364 | + | 4809  | 1.725537 | 0.563246 | -0.35562 | 0.128337 | -2.77095 | 0.006677 | 0.030687 | 1 |
| ENSG0000 response | Inflamed | OSBPL8     | protein_cc | chr12 | 76745577 | 76953589 | - | 9198  | 959.0668 | 0        | -0.5503  | 0.198621 | -2.77061 | 0.006683 | 0.030711 | 1 |
| ENSG0000 response | Inflamed | SCO1       | protein_cc | chr17 | 10583654 | 10601692 | - | 2367  | 1081.487 | 0        | 0.265453 | 0.095826 | 2.770161 | 0.006692 | 0.030739 | 1 |
| ENSG0000 response | Inflamed | ABCD2      | protein_cc | chr12 | 39943835 | 40013553 | - | 6238  | 42.31742 | 0.019093 | -0.6418  | 0.231687 | -2.77012 | 0.006693 | 0.030739 | 1 |
| ENSG0000 response | Inflamed | AC115522   | lincRNA    | chr19 | 44298461 | 44299810 | - | 556   | 11.72554 | 0.090692 | -0.48221 | 0.174077 | -2.77011 | 0.006693 | 0.030739 | 1 |
| ENSG0000 response | Inflamed | KL         | protein_cc | chr13 | 33590207 | 33640282 | + | 5301  | 95.93079 | 0.01432  | -0.47713 | 0.172256 | -2.76991 | 0.006696 | 0.030751 | 1 |
| ENSG0000 response | Inflamed | UGT1A4     | protein_cc | chr2  | 2.35E+08 | 2.35E+08 | + | 2522  | 2.400955 | 0.682578 | 0.421925 | 0.152328 | 2.769854 | 0.006698 | 0.030751 | 1 |
| ENSG0000 response | Inflamed | PSMB2      | protein_cc | chr1  | 36067185 | 36107445 | - | 2701  | 3778.933 | 0        | -0.18972 | 0.068503 | -2.76949 | 0.006704 | 0.030777 | 1 |
| ENSG0000 response | Inflamed | GLYCTK     | protein_cc | chr3  | 52321105 | 52329272 | + | 4793  | 1366.547 | 0        | 0.330939 | 0.119497 | 2.769427 | 0.006706 | 0.030777 | 1 |
| ENSG0000 response | Inflamed | RP11-134F  | lincRNA    | chr1  | 2.03E+08 | 2.03E+08 | - | 2725  | 6.632458 | 0.231504 | -0.5235  | 0.189038 | -2.7693  | 0.006708 | 0.030783 | 1 |
| ENSG0000 response | Inflamed | GPR17      | protein_cc | chr2  | 1.28E+08 | 1.28E+08 | + | 2671  | 35.43198 | 0.026253 | 0.616637 | 0.222749 | 2.768303 | 0.006727 | 0.030865 | 1 |
| ENSG0000 response | Inflamed | TBC1D25    | protein_cc | chrX  | 48397845 | 48420997 | + | 4223  | 783.0024 | 0        | -0.19896 | 0.071872 | -2.76825 | 0.006728 | 0.030865 | 1 |
| ENSG0000 response | Inflamed | IRF1       | protein_cc | chr5  | 1.32E+08 | 1.32E+08 | - | 7799  | 8984.632 | 0        | -0.40352 | 0.145829 | -2.76707 | 0.006751 | 0.030963 | 1 |
| ENSG0000 response | Inflamed | AL121985   | pseudoger  | chr1  | 1.61E+08 | 1.61E+08 | + | 237   | 2.875895 | 0.463007 | -0.49133 | 0.177573 | -2.76691 | 0.006754 | 0.030971 | 1 |
| ENSG0000 response | Inflamed | 01-Mar     | protein_cc | chr4  | 1.64E+08 | 1.65E+08 | - | 10421 | 229.6229 | 0        | -0.58931 | 0.213024 | -2.76642 | 0.006763 | 0.031009 | 1 |
| ENSG0000 response | Inflamed | TRIM31-A'  | antisense  | chr6  | 30073017 | 30082501 | + | 549   | 16.46539 | 0.01432  | 0.437167 | 0.158031 | 2.76634  | 0.006765 | 0.031011 | 1 |
| ENSG0000 response | Inflamed | AC004160   | antisense  | chr7  | 11446582 | 11453705 | + | 563   | 1.260143 | 0.684964 | -0.30528 | 0.110359 | -2.76622 | 0.006767 | 0.031016 | 1 |
| ENSG0000 response | Inflamed | RP11-430k  | pseudoger  | chr9  | 1.15E+08 | 1.15E+08 | + | 413   | 3.599045 | 0.310263 | -0.40545 | 0.146575 | -2.76613 | 0.006769 | 0.031018 | 1 |
| ENSG0000 response | Inflamed | GATA1      | protein_cc | chrX  | 48644962 | 48652716 | + | 1498  | 28.6969  | 0.009547 | -0.51658 | 0.186781 | -2.76568 | 0.006777 | 0.031053 | 1 |
| ENSG0000 response | Inflamed | TBX1       | protein_cc | chr22 | 19744226 | 19771116 | + | 3494  | 42.91885 | 0.016706 | -0.68159 | 0.246466 | -2.76545 | 0.006782 | 0.031065 | 1 |
| ENSG0000 response | Inflamed | RP4-659I1' | pseudoger  | chr1  | 2.33E+08 | 2.33E+08 | + | 784   | 6.307876 | 0.415274 | 0.502583 | 0.181739 | 2.76542  | 0.006783 | 0.031065 | 1 |
| ENSG0000 response | Inflamed | ABHD14A-   | protein_cc | chr3  | 52009066 | 52023199 | + | 2164  | 193.4773 | 0        | 0.346918 | 0.125491 | 2.764489 | 0.006801 | 0.031142 | 1 |
| ENSG0000 response | Inflamed | AC011747   | lincRNA    | chr2  | 8683722  | 8715631  | - | 1036  | 12.31981 | 0.064439 | 0.535634 | 0.1938   | 2.763845 | 0.006813 | 0.031192 | 1 |
| ENSG0000 response | Inflamed | PCTP       | protein_cc | chr17 | 53828340 | 53920191 | + | 5880  | 965.7947 | 0        | 0.23474  | 0.084934 | 2.763795 | 0.006814 | 0.031192 | 1 |
| ENSG0000 response | Inflamed | PCDH15     | protein_cc | chr10 | 55562531 | 57387702 | - | 14967 | 6.713604 | 0.420048 | -0.72088 | 0.260845 | -2.76364 | 0.006817 | 0.031201 | 1 |
| ENSG0000 response | Inflamed | ADCY7      | protein_cc | chr16 | 50280048 | 50352046 | + | 8630  | 2362.236 | 0        | -0.40515 | 0.146627 | -2.76313 | 0.006827 | 0.031241 | 1 |
| ENSG0000 response | Inflamed | PTP4A2P2   | pseudoger  | chr11 | 1.34E+08 | 1.34E+08 | - | 502   | 1.422434 | 0.651551 | -0.33078 | 0.119722 | -2.76293 | 0.006831 | 0.03125  | 1 |
| ENSG0000 response | Inflamed | ST6GAL1    | protein_cc | chr3  | 1.87E+08 | 1.87E+08 | + | 9151  | 7101.589 | 0        | -0.45479 | 0.164607 | -2.76288 | 0.006832 | 0.03125  | 1 |
| ENSG0000 response | Inflamed | FAM177A1   | protein_cc | chr14 | 35514113 | 35582336 | + | 8383  | 1688.554 | 0        | 0.273073 | 0.098838 | 2.762835 | 0.006833 | 0.03125  | 1 |
| ENSG0000 response | Inflamed | ST3GAL6    | protein_cc | chr3  | 98451080 | 98540045 | + | 6288  | 101.2792 | 0        | -0.43273 | 0.156668 | -2.7621  | 0.006847 | 0.03131  | 1 |
| ENSG0000 response | Inflamed | TUBG1      | protein_cc | chr17 | 40761694 | 40767252 | + | 2411  | 1242.974 | 0        | -0.19152 | 0.069343 | -2.76191 | 0.00685  | 0.031322 | 1 |
| ENSG0000 response | Inflamed | STX1B      | protein_cc | chr16 | 31000577 | 31021949 | - | 5408  | 63.46778 | 0.026253 | -0.63129 | 0.228585 | -2.76175 | 0.006854 | 0.031331 | 1 |
| ENSG0000 response | Inflamed | KIAA1244   | protein_cc | chr6  | 1.38E+08 | 1.39E+08 | + | 14877 | 1780.227 | 0        | 0.589001 | 0.213279 | 2.761639 | 0.006856 | 0.031335 | 1 |
| ENSG0000 response | Inflamed | ZNF542     | pseudoger  | chr19 | 56879468 | 56891197 | + | 4690  | 179.5704 | 0        | -0.36905 | 0.133643 | -2.76147 | 0.006859 | 0.031344 | 1 |

|                   |          |                     |                  |          |          |   |       |          |          |          |          |          |          |          |   |
|-------------------|----------|---------------------|------------------|----------|----------|---|-------|----------|----------|----------|----------|----------|----------|----------|---|
| ENSG0000 response | Inflamed | RP5-884G6 antisense | chr1             | 1E+08    | 1E+08    | - | 655   | 17.3389  | 0.002387 | 0.315358 | 0.114207 | 2.76129  | 0.006863 | 0.031354 | 1 |
| ENSG0000 response | Inflamed | NAPRT1              | protein_cc chr8  | 1.45E+08 | 1.45E+08 | - | 3079  | 5110.616 | 0        | 0.283681 | 0.102738 | 2.761213 | 0.006864 | 0.031354 | 1 |
| ENSG0000 response | Inflamed | WDR86               | protein_cc chr7  | 1.51E+08 | 1.51E+08 | - | 4026  | 70.22912 | 0.00716  | -0.58046 | 0.210221 | -2.76118 | 0.006865 | 0.031354 | 1 |
| ENSG0000 response | Inflamed | GRAMD1B             | protein_cc chr11 | 1.23E+08 | 1.23E+08 | + | 9770  | 407.0811 | 0        | -0.50767 | 0.183881 | -2.76089 | 0.00687  | 0.031374 | 1 |
| ENSG0000 response | Inflamed | STPG1               | protein_cc chr1  | 24683489 | 24743424 | - | 8514  | 612.4749 | 0        | 0.316494 | 0.11464  | 2.760753 | 0.006873 | 0.031376 | 1 |
| ENSG0000 response | Inflamed | ACOT9               | protein_cc chrX  | 23720370 | 23784592 | - | 5046  | 1050.728 | 0        | -0.3037  | 0.110008 | -2.76075 | 0.006873 | 0.031376 | 1 |
| ENSG0000 response | Inflamed | TMEM251             | protein_cc chr14 | 93651296 | 93653434 | + | 1365  | 354.0692 | 0        | 0.279494 | 0.101252 | 2.760385 | 0.00688  | 0.031403 | 1 |
| ENSG0000 response | Inflamed | RP11-1079 lincRNA   | chr17            | 47438527 | 47447360 | + | 881   | 5.069212 | 0.174224 | -0.40015 | 0.144964 | -2.76032 | 0.006881 | 0.031403 | 1 |
| ENSG0000 response | Inflamed | FETUB               | protein_cc chr3  | 1.86E+08 | 1.86E+08 | + | 2024  | 3.336516 | 0.665871 | 0.629052 | 0.22793  | 2.759853 | 0.006891 | 0.03144  | 1 |
| ENSG0000 response | Inflamed | TCP10               | protein_cc chr6  | 1.68E+08 | 1.68E+08 | - | 7695  | 1.890215 | 0.613365 | 0.35292  | 0.127883 | 2.759703 | 0.006894 | 0.031448 | 1 |
| ENSG0000 response | Inflamed | FGF4                | protein_cc chr11 | 69587797 | 69590171 | - | 1220  | 1.799523 | 0.644391 | -0.36938 | 0.133868 | -2.75929 | 0.006902 | 0.031477 | 1 |
| ENSG0000 response | Inflamed | OAS2                | protein_cc chr12 | 1.13E+08 | 1.13E+08 | + | 6264  | 2000.36  | 0        | -0.47229 | 0.171168 | -2.75924 | 0.006903 | 0.031477 | 1 |
| ENSG0000 response | Inflamed | TCTN1               | protein_cc chr12 | 1.11E+08 | 1.11E+08 | + | 9605  | 482.0549 | 0        | -0.29476 | 0.10683  | -2.75919 | 0.006904 | 0.031477 | 1 |
| ENSG0000 response | Inflamed | GVQW1               | protein_cc chr9  | 32566787 | 32568619 | + | 1833  | 19.89737 | 0.01432  | -0.25323 | 0.09178  | -2.7591  | 0.006905 | 0.031479 | 1 |
| ENSG0000 response | Inflamed | ART4                | protein_cc chr12 | 14978503 | 14996429 | - | 5214  | 5.754177 | 0.274463 | -0.52827 | 0.191487 | -2.75876 | 0.006912 | 0.031502 | 1 |
| ENSG0000 response | Inflamed | RP11-4181 lincRNA   | chr16            | 9560512  | 9611421  | + | 796   | 1.047733 | 0.75895  | 0.252565 | 0.091551 | 2.758728 | 0.006913 | 0.031502 | 1 |
| ENSG0000 response | Inflamed | ST18                | protein_cc chr8  | 53023399 | 53373519 | - | 14396 | 22.9284  | 0.02148  | 0.532444 | 0.19301  | 2.758631 | 0.006915 | 0.031505 | 1 |
| ENSG0000 response | Inflamed | TCF7L2              | protein_cc chr10 | 1.15E+08 | 1.15E+08 | + | 5049  | 3524.284 | 0        | 0.463815 | 0.168139 | 2.758518 | 0.006917 | 0.03151  | 1 |
| ENSG0000 response | Inflamed | CEACAM3             | protein_cc chr19 | 42300369 | 42315591 | + | 3080  | 165.2888 | 0        | -0.63992 | 0.231991 | -2.75839 | 0.006919 | 0.031516 | 1 |
| ENSG0000 response | Inflamed | MYO7B               | protein_cc chr2  | 1.28E+08 | 1.28E+08 | + | 8806  | 12642.05 | 0        | 0.535155 | 0.194016 | 2.758303 | 0.006921 | 0.031518 | 1 |
| ENSG0000 response | Inflamed | SCN5A               | protein_cc chr3  | 38589548 | 38691164 | - | 10017 | 41.87589 | 0.00716  | -0.47809 | 0.173366 | -2.75766 | 0.006934 | 0.03157  | 1 |
| ENSG0000 response | Inflamed | RAB3IP              | protein_cc chr12 | 70132461 | 70216984 | + | 12612 | 634.7017 | 0        | 0.415933 | 0.150834 | 2.757563 | 0.006936 | 0.031573 | 1 |
| ENSG0000 response | Inflamed | TP53INP2            | protein_cc chr20 | 33292094 | 33301243 | + | 4228  | 8214.155 | 0        | 0.397666 | 0.144231 | 2.757157 | 0.006944 | 0.031599 | 1 |
| ENSG0000 response | Inflamed | CRYGN               | protein_cc chr7  | 1.51E+08 | 1.51E+08 | - | 2716  | 1.818616 | 0.553699 | -0.32732 | 0.118717 | -2.75715 | 0.006944 | 0.031599 | 1 |
| ENSG0000 response | Inflamed | C3orf20             | protein_cc chr3  | 14716606 | 14814541 | + | 3492  | 6.940334 | 0.157518 | -0.45804 | 0.166203 | -2.75592 | 0.006968 | 0.031704 | 1 |
| ENSG0000 response | Inflamed | DNAH17              | protein_cc chr17 | 76419778 | 76573476 | - | 16142 | 14.8926  | 0.095465 | -0.63155 | 0.229203 | -2.75541 | 0.006978 | 0.031745 | 1 |
| ENSG0000 response | Inflamed | TEX11               | protein_cc chrX  | 69748790 | 70128581 | - | 3371  | 63.31981 | 0        | 0.483978 | 0.175655 | 2.755278 | 0.006981 | 0.031751 | 1 |
| ENSG0000 response | Inflamed | KIAA1737            | protein_cc chr14 | 77564440 | 77583630 | + | 5300  | 1206.358 | 0        | 0.498276 | 0.180854 | 2.755136 | 0.006983 | 0.031758 | 1 |
| ENSG0000 response | Inflamed | TAP1                | protein_cc chr6  | 32812986 | 32821755 | - | 4742  | 11757.22 | 0        | -0.31921 | 0.115874 | -2.75483 | 0.00699  | 0.031781 | 1 |
| ENSG0000 response | Inflamed | HTR7P1              | pseudoger chr12  | 13152812 | 13155768 | + | 2299  | 27.72554 | 0.02864  | -0.42181 | 0.15315  | -2.75421 | 0.007002 | 0.031829 | 1 |
| ENSG0000 response | Inflamed | RAB4A               | protein_cc chr1  | 2.29E+08 | 2.29E+08 | + | 3297  | 1191.124 | 0        | 0.21691  | 0.078757 | 2.754173 | 0.007003 | 0.031829 | 1 |
| ENSG0000 response | Inflamed | PARD3               | protein_cc chr10 | 34398488 | 35104253 | - | 6513  | 1665.401 | 0        | 0.332325 | 0.120672 | 2.753962 | 0.007007 | 0.031842 | 1 |
| ENSG0000 response | Inflamed | CCR6                | protein_cc chr6  | 1.68E+08 | 1.68E+08 | + | 4226  | 16.39141 | 0.059666 | -0.53578 | 0.194573 | -2.75365 | 0.007013 | 0.031865 | 1 |
| ENSG0000 response | Inflamed | ADCK1               | protein_cc chr14 | 78266426 | 78401355 | + | 5317  | 469.8067 | 0        | 0.190326 | 0.06912  | 2.753565 | 0.007015 | 0.031867 | 1 |
| ENSG0000 response | Inflamed | HSPB7               | protein_cc chr1  | 16340523 | 16346089 | - | 3910  | 172.9212 | 0.002387 | -0.82437 | 0.299411 | -2.7533  | 0.00702  | 0.031883 | 1 |
| ENSG0000 response | Inflamed | RP11-254F antisense | chr2             | 10194548 | 10194993 | - | 446   | 1.295943 | 0.644391 | 0.317438 | 0.115295 | 2.753269 | 0.007021 | 0.031883 | 1 |
| ENSG0000 response | Inflamed | STON2               | protein_cc chr14 | 81727000 | 81902809 | - | 6675  | 206.1551 | 0        | 0.454311 | 0.165025 | 2.752975 | 0.007026 | 0.031904 | 1 |
| ENSG0000 response | Inflamed | AC097639 pseudoger  | chr3             | 32232239 | 32233119 | + | 881   | 8.782816 | 0.150358 | 0.515782 | 0.187365 | 2.752827 | 0.007029 | 0.031912 | 1 |
| ENSG0000 response | Inflamed | RP11-4211 lincRNA   | chr16            | 48657347 | 48778553 | + | 1642  | 6.830549 | 0.066826 | 0.387555 | 0.140788 | 2.752766 | 0.007031 | 0.031912 | 1 |
| ENSG0000 response | Inflamed | FEN1                | protein_cc chr11 | 61560109 | 61564716 | + | 2478  | 918.0143 | 0        | -0.29504 | 0.107205 | -2.75209 | 0.007044 | 0.031967 | 1 |

|                   |          |           |                  |          |          |   |       |          |          |          |          |          |          |          |   |
|-------------------|----------|-----------|------------------|----------|----------|---|-------|----------|----------|----------|----------|----------|----------|----------|---|
| ENSG0000 response | Inflamed | SYNE1     | protein_cc chr6  | 1.52E+08 | 1.53E+08 | - | 45649 | 1698.89  | 0        | -0.50811 | 0.18464  | -2.7519  | 0.007048 | 0.031979 | 1 |
| ENSG0000 response | Inflamed | S100B     | protein_cc chr21 | 48018875 | 48025121 | - | 1448  | 212.6659 | 0        | -0.51371 | 0.186678 | -2.75183 | 0.007049 | 0.03198  | 1 |
| ENSG0000 response | Inflamed | TCEAL3    | protein_cc chrX  | 1.03E+08 | 1.03E+08 | + | 2305  | 313.8974 | 0        | -0.30779 | 0.111853 | -2.75172 | 0.007051 | 0.03198  | 1 |
| ENSG0000 response | Inflamed | CTSV      | protein_cc chr9  | 99794940 | 99801925 | - | 1721  | 112.4368 | 0.004773 | 0.750636 | 0.272789 | 2.751711 | 0.007052 | 0.03198  | 1 |
| ENSG0000 response | Inflamed | DPYS      | protein_cc chr8  | 1.05E+08 | 1.05E+08 | - | 3818  | 2.286396 | 0.48926  | -0.41681 | 0.151481 | -2.75155 | 0.007055 | 0.03198  | 1 |
| ENSG0000 response | Inflamed | SLC16A4   | protein_cc chr1  | 1.11E+08 | 1.11E+08 | - | 3167  | 152.9045 | 0.002387 | -0.66115 | 0.240284 | -2.75152 | 0.007055 | 0.03198  | 1 |
| ENSG0000 response | Inflamed | FAR2      | protein_cc chr12 | 29302036 | 29493913 | + | 5411  | 1459.234 | 0        | 0.428802 | 0.155842 | 2.751521 | 0.007055 | 0.03198  | 1 |
| ENSG0000 response | Inflamed | AC003102  | antisense chr17  | 42376942 | 42392683 | - | 5403  | 7.634845 | 0.121718 | -0.53082 | 0.192934 | -2.75128 | 0.00706  | 0.031996 | 1 |
| ENSG0000 response | Inflamed | RP11-1275 | lincRNA chr7     | 5468362  | 5469303  | + | 942   | 19.35561 | 0        | 0.322994 | 0.117404 | 2.751131 | 0.007063 | 0.032005 | 1 |
| ENSG0000 response | Inflamed | HEY1      | protein_cc chr8  | 80676245 | 80680098 | - | 3232  | 203.6253 | 0        | -0.31673 | 0.115143 | -2.75072 | 0.007071 | 0.032034 | 1 |
| ENSG0000 response | Inflamed | TRAC      | TR_C_gene chr14  | 23016447 | 23021097 | + | 974   | 1212.284 | 0        | -0.46013 | 0.167282 | -2.75062 | 0.007073 | 0.032034 | 1 |
| ENSG0000 response | Inflamed | CCDC151   | protein_cc chr19 | 11531272 | 11546603 | - | 2681  | 10.77327 | 0.002387 | -0.33927 | 0.123344 | -2.75057 | 0.007074 | 0.032034 | 1 |
| ENSG0000 response | Inflamed | MTATP6P1  | pseudoger chr1   | 569076   | 569756   | + | 681   | 1792.938 | 0        | 0.400234 | 0.145511 | 2.750535 | 0.007075 | 0.032034 | 1 |
| ENSG0000 response | Inflamed | DNAJC11   | protein_cc chr1  | 6694228  | 6761984  | - | 5147  | 3726.465 | 0        | 0.239113 | 0.086934 | 2.750505 | 0.007076 | 0.032034 | 1 |
| ENSG0000 response | Inflamed | SLC9A1    | protein_cc chr1  | 27425306 | 27493472 | - | 5974  | 7353.974 | 0        | 0.345593 | 0.12567  | 2.750009 | 0.007086 | 0.032064 | 1 |
| ENSG0000 response | Inflamed | ADM2      | protein_cc chr22 | 50919985 | 50924869 | + | 4276  | 620.8401 | 0        | -0.34267 | 0.124606 | -2.75001 | 0.007086 | 0.032064 | 1 |
| ENSG0000 response | Inflamed | HSPA7     | pseudoger chr1   | 1.62E+08 | 1.62E+08 | + | 1927  | 192.4081 | 0.004773 | -0.67437 | 0.245228 | -2.74999 | 0.007086 | 0.032064 | 1 |
| ENSG0000 response | Inflamed | CITED4    | protein_cc chr1  | 41326729 | 41328018 | - | 1290  | 151.6492 | 0        | -0.53149 | 0.193285 | -2.74975 | 0.007091 | 0.03208  | 1 |
| ENSG0000 response | Inflamed | CHST1     | protein_cc chr11 | 45670427 | 45687172 | - | 3478  | 182.4582 | 0        | -0.44375 | 0.161409 | -2.74923 | 0.007101 | 0.032119 | 1 |
| ENSG0000 response | Inflamed | ADPGK     | protein_cc chr15 | 73043710 | 73078187 | - | 5931  | 2503.026 | 0        | -0.27185 | 0.098883 | -2.7492  | 0.007102 | 0.032119 | 1 |
| ENSG0000 response | Inflamed | SLC35A3   | protein_cc chr1  | 1E+08    | 1E+08    | + | 6241  | 3257.64  | 0        | 0.581232 | 0.21143  | 2.749055 | 0.007105 | 0.032127 | 1 |
| ENSG0000 response | Inflamed | RP11-5281 | antisense chr4   | 56413279 | 56414056 | + | 778   | 2.064439 | 0.477327 | -0.38637 | 0.140557 | -2.74885 | 0.007109 | 0.03214  | 1 |
| ENSG0000 response | Inflamed | RP11-380L | antisense chr12  | 1.24E+08 | 1.24E+08 | - | 623   | 4.689737 | 0.155131 | -0.38748 | 0.140972 | -2.74866 | 0.007113 | 0.032152 | 1 |
| ENSG0000 response | Inflamed | CTA-384D  | lincRNA chr22    | 51035581 | 51036028 | + | 448   | 1.315036 | 0.622912 | -0.27829 | 0.101273 | -2.74787 | 0.007129 | 0.032213 | 1 |
| ENSG0000 response | Inflamed | ITGA8     | protein_cc chr10 | 15555948 | 15762124 | - | 7528  | 905.864  | 0        | -0.51969 | 0.18913  | -2.74779 | 0.00713  | 0.032213 | 1 |
| ENSG0000 response | Inflamed | DIRC1     | protein_cc chr2  | 1.9E+08  | 1.9E+08  | - | 1037  | 1.551313 | 0.778043 | -0.52138 | 0.189745 | -2.74777 | 0.007131 | 0.032213 | 1 |
| ENSG0000 response | Inflamed | NIPAL2    | protein_cc chr8  | 99202061 | 99306621 | - | 5599  | 1763.859 | 0        | 0.509849 | 0.185552 | 2.747745 | 0.007131 | 0.032213 | 1 |
| ENSG0000 response | Inflamed | HLA-DQB1  | protein_cc chr6  | 32627244 | 32636160 | - | 4904  | 3107.112 | 0        | -0.45752 | 0.166515 | -2.74763 | 0.007134 | 0.032218 | 1 |
| ENSG0000 response | Inflamed | IGHV5-78  | IG_V_pseu chr14  | 1.07E+08 | 1.07E+08 | - | 295   | 13.96181 | 0.143198 | -0.65522 | 0.238512 | -2.74712 | 0.007144 | 0.032259 | 1 |
| ENSG0000 response | Inflamed | AC010980  | pseudoger chr2   | 2.23E+08 | 2.23E+08 | + | 2567  | 3.663484 | 0.317422 | -0.44122 | 0.160622 | -2.74695 | 0.007147 | 0.032269 | 1 |
| ENSG0000 response | Inflamed | UGT8      | protein_cc chr4  | 1.16E+08 | 1.16E+08 | + | 4699  | 1541.422 | 0        | 0.567297 | 0.206614 | 2.74568  | 0.007173 | 0.032379 | 1 |
| ENSG0000 response | Inflamed | PTPN21    | protein_cc chr14 | 88932122 | 89021077 | - | 7396  | 1421.931 | 0        | 0.428358 | 0.156046 | 2.745081 | 0.007185 | 0.032429 | 1 |
| ENSG0000 response | Inflamed | SLC25A5P  | pseudoger chr2   | 34064849 | 34065745 | - | 897   | 2.295943 | 0.460621 | 0.337752 | 0.12308  | 2.744158 | 0.007204 | 0.032508 | 1 |
| ENSG0000 response | Inflamed | RP11-574k | protein_cc chr10 | 75556272 | 75571409 | - | 5818  | 46.07399 | 0.011933 | -0.30692 | 0.111869 | -2.74358 | 0.007216 | 0.032556 | 1 |
| ENSG0000 response | Inflamed | CFH       | protein_cc chr1  | 1.97E+08 | 1.97E+08 | + | 8144  | 1782.647 | 0        | -0.58327 | 0.212626 | -2.74316 | 0.007224 | 0.032588 | 1 |
| ENSG0000 response | Inflamed | TRBV30    | TR_V_gene chr7   | 1.43E+08 | 1.43E+08 | - | 447   | 14.08831 | 0.112172 | -0.54352 | 0.198149 | -2.74298 | 0.007228 | 0.0326   | 1 |
| ENSG0000 response | Inflamed | WNT7B     | protein_cc chr22 | 46316242 | 46373009 | - | 5051  | 21.1957  | 0.410501 | -1.05554 | 0.384856 | -2.7427  | 0.007234 | 0.03262  | 1 |
| ENSG0000 response | Inflamed | CTD-2334  | lincRNA chr5     | 1.2E+08  | 1.2E+08  | + | 1114  | 21.13604 | 0.023866 | -0.52652 | 0.191994 | -2.74239 | 0.00724  | 0.032643 | 1 |
| ENSG0000 response | Inflamed | CTD-2005  | pseudoger chr4   | 69650336 | 69653192 | + | 714   | 3.947494 | 0.400955 | 0.424847 | 0.154928 | 2.742228 | 0.007243 | 0.032652 | 1 |
| ENSG0000 response | Inflamed | CTGLF11P  | pseudoger chr10  | 47708307 | 47730235 | + | 2439  | 7.195704 | 0.372315 | 0.496501 | 0.181077 | 2.741931 | 0.007249 | 0.032674 | 1 |

|                   |          |            |                  |          |          |   |       |          |          |          |          |          |          |          |   |
|-------------------|----------|------------|------------------|----------|----------|---|-------|----------|----------|----------|----------|----------|----------|----------|---|
| ENSG0000 response | Inflamed | FBXO34     | protein_cc chr14 | 55738021 | 55828636 | + | 4133  | 1971.002 | 0        | 0.409928 | 0.149543 | 2.741199 | 0.007264 | 0.032736 | 1 |
| ENSG0000 response | Inflamed | CTD-2655t  | antisense chr11  | 67889520 | 67897985 | + | 776   | 1.057279 | 0.713604 | 0.243682 | 0.088901 | 2.741036 | 0.007268 | 0.032744 | 1 |
| ENSG0000 response | Inflamed | TYW1B      | polymorph chr7   | 72023729 | 72298777 | - | 3406  | 119.2291 | 0.00716  | 0.405936 | 0.148098 | 2.740989 | 0.007269 | 0.032744 | 1 |
| ENSG0000 response | Inflamed | CTD-2256f  | antisense chr5   | 10264709 | 10267258 | - | 2550  | 7.415274 | 0.21957  | 0.527341 | 0.192398 | 2.740891 | 0.007271 | 0.032748 | 1 |
| ENSG0000 response | Inflamed | RHPN1-AS   | antisense chr8   | 1.44E+08 | 1.44E+08 | - | 1918  | 14.04773 | 0.023866 | -0.36809 | 0.134306 | -2.74069 | 0.007275 | 0.032759 | 1 |
| ENSG0000 response | Inflamed | ZDHHC13    | protein_cc chr11 | 19138646 | 19197969 | + | 7763  | 855.031  | 0        | 0.386536 | 0.141039 | 2.740642 | 0.007276 | 0.032759 | 1 |
| ENSG0000 response | Inflamed | DPF2       | protein_cc chr11 | 65101225 | 65120720 | + | 7715  | 1764.928 | 0        | -0.20927 | 0.076367 | -2.74035 | 0.007282 | 0.032781 | 1 |
| ENSG0000 response | Inflamed | hsa-mir-45 | miRNA chr14      | 1.06E+08 | 1.06E+08 | - | 70    | 59.73508 | 0.040573 | -0.8344  | 0.304503 | -2.74019 | 0.007285 | 0.03279  | 1 |
| ENSG0000 response | Inflamed | TNK2       | protein_cc chr3  | 1.96E+08 | 1.96E+08 | - | 11297 | 2521.377 | 0        | -0.33719 | 0.123059 | -2.74004 | 0.007288 | 0.032798 | 1 |
| ENSG0000 response | Inflamed | IL19       | protein_cc chr1  | 2.07E+08 | 2.07E+08 | + | 2579  | 8.415274 | 0.400955 | -0.72029 | 0.262901 | -2.73979 | 0.007293 | 0.032816 | 1 |
| ENSG0000 response | Inflamed | PTPRU      | protein_cc chr1  | 29563028 | 29653325 | + | 6700  | 378.0477 | 0.002387 | -0.67016 | 0.244635 | -2.73942 | 0.007301 | 0.032844 | 1 |
| ENSG0000 response | Inflamed | PLXNB1     | protein_cc chr3  | 48445261 | 48471594 | - | 9796  | 4862.315 | 0        | 0.367104 | 0.134018 | 2.739221 | 0.007305 | 0.032857 | 1 |
| ENSG0000 response | Inflamed | SLC35A2    | protein_cc chrX  | 48760459 | 48769235 | - | 3183  | 2310.523 | 0        | 0.205562 | 0.07505  | 2.738992 | 0.00731  | 0.032873 | 1 |
| ENSG0000 response | Inflamed | KIF21B     | protein_cc chr1  | 2.01E+08 | 2.01E+08 | - | 12148 | 1767.327 | 0        | -0.40073 | 0.146345 | -2.73829 | 0.007324 | 0.032932 | 1 |
| ENSG0000 response | Inflamed | RP11-286t  | sense_ove chr7   | 1.29E+08 | 1.29E+08 | + | 472   | 5.661098 | 0.107399 | -0.39072 | 0.142689 | -2.73824 | 0.007325 | 0.032932 | 1 |
| ENSG0000 response | Inflamed | IGHA1      | IG_C_gene chr14  | 1.06E+08 | 1.06E+08 | - | 1110  | 767809.4 | 0        | -0.70883 | 0.258892 | -2.73792 | 0.007332 | 0.032956 | 1 |
| ENSG0000 response | Inflamed | NDFIP2     | protein_cc chr13 | 80055287 | 80130210 | + | 4806  | 2104.141 | 0        | 0.413447 | 0.151019 | 2.737705 | 0.007336 | 0.03297  | 1 |
| ENSG0000 response | Inflamed | RP11-490c  | antisense chr16  | 11835766 | 11838362 | + | 2597  | 7.804296 | 0.042959 | -0.3366  | 0.122954 | -2.73761 | 0.007339 | 0.032974 | 1 |
| ENSG0000 response | Inflamed | RP11-248J  | protein_cc chr10 | 97709725 | 97744785 | + | 2990  | 2.069212 | 0.51074  | -0.39448 | 0.144126 | -2.73706 | 0.00735  | 0.033019 | 1 |
| ENSG0000 response | Inflamed | COMTD1     | protein_cc chr10 | 76993727 | 76995788 | - | 1580  | 1101.379 | 0        | 0.301979 | 0.110342 | 2.736749 | 0.007356 | 0.033039 | 1 |
| ENSG0000 response | Inflamed | PFKFB2     | protein_cc chr1  | 2.07E+08 | 2.07E+08 | + | 9815  | 3403.217 | 0        | 0.543367 | 0.198546 | 2.736728 | 0.007357 | 0.033039 | 1 |
| ENSG0000 response | Inflamed | CREB3L3    | protein_cc chr19 | 4153598  | 4173051  | + | 2678  | 538.2554 | 0.02148  | 1.27906  | 0.467402 | 2.736528 | 0.007361 | 0.033047 | 1 |
| ENSG0000 response | Inflamed | ATPAF1     | protein_cc chr1  | 47098409 | 47139539 | - | 5654  | 1323.2   | 0        | 0.215418 | 0.07872  | 2.736516 | 0.007361 | 0.033047 | 1 |
| ENSG0000 response | Inflamed | FAM129C    | protein_cc chr19 | 17634110 | 17664648 | + | 6628  | 301.4344 | 0.02148  | -1.04652 | 0.382443 | -2.7364  | 0.007364 | 0.033052 | 1 |
| ENSG0000 response | Inflamed | MRPL35     | protein_cc chr2  | 86426478 | 86440917 | + | 3829  | 1334.301 | 0        | 0.369435 | 0.135027 | 2.736008 | 0.007372 | 0.033083 | 1 |
| ENSG0000 response | Inflamed | SHISA2     | protein_cc chr13 | 26618735 | 26625169 | - | 2860  | 33.86874 | 0.016706 | -0.52286 | 0.191167 | -2.73511 | 0.00739  | 0.033161 | 1 |
| ENSG0000 response | Inflamed | LINC00488  | lincRNA chr3     | 1.09E+08 | 1.09E+08 | + | 2520  | 3.050119 | 0.565632 | 0.401077 | 0.14665  | 2.734924 | 0.007394 | 0.033173 | 1 |
| ENSG0000 response | Inflamed | WIPI2      | protein_cc chr7  | 5229819  | 5273457  | + | 8977  | 2378.134 | 0        | -0.13995 | 0.05118  | -2.73451 | 0.007403 | 0.033206 | 1 |
| ENSG0000 response | Inflamed | RP11-599J  | pseudoger chr12  | 9550951  | 9567447  | - | 400   | 20.46301 | 0.033413 | -0.47371 | 0.173242 | -2.7344  | 0.007405 | 0.033211 | 1 |
| ENSG0000 response | Inflamed | PAOX       | protein_cc chr10 | 1.35E+08 | 1.35E+08 | + | 2320  | 351.0286 | 0        | -0.22499 | 0.082286 | -2.73431 | 0.007407 | 0.033214 | 1 |
| ENSG0000 response | Inflamed | AL450992   | antisense chr1   | 1.52E+08 | 1.52E+08 | + | 506   | 42.07876 | 0.02148  | -0.48187 | 0.176241 | -2.73414 | 0.007411 | 0.033224 | 1 |
| ENSG0000 response | Inflamed | AIMP2      | protein_cc chr7  | 6048876  | 6063465  | + | 1838  | 976.8138 | 0        | 0.213953 | 0.07827  | 2.733507 | 0.007424 | 0.033278 | 1 |
| ENSG0000 response | Inflamed | FRY        | protein_cc chr13 | 32605437 | 32870794 | + | 16059 | 548.1527 | 0        | -0.43303 | 0.158447 | -2.73295 | 0.007435 | 0.033324 | 1 |
| ENSG0000 response | Inflamed | KCNH4      | protein_cc chr17 | 40308909 | 40333296 | - | 3924  | 16.88305 | 0.047733 | -0.55944 | 0.204714 | -2.7328  | 0.007439 | 0.033332 | 1 |
| ENSG0000 response | Inflamed | RP11-963t  | lincRNA chr17    | 10752858 | 10784212 | + | 774   | 9.892601 | 0.102625 | 0.500698 | 0.183254 | 2.732257 | 0.00745  | 0.033376 | 1 |
| ENSG0000 response | Inflamed | RNU6-574   | snRNA chr12      | 52381441 | 52381547 | + | 107   | 1.47494  | 0.603819 | 0.306508 | 0.112183 | 2.73222  | 0.007451 | 0.033376 | 1 |
| ENSG0000 response | Inflamed | CTD-2566j  | antisense chr14  | 68591721 | 68596913 | - | 537   | 134.4272 | 0.02864  | 0.860141 | 0.31487  | 2.731735 | 0.007461 | 0.033416 | 1 |
| ENSG0000 response | Inflamed | LRRC70     | protein_cc chr5  | 61874562 | 61877275 | + | 2249  | 8.107399 | 0.128878 | -0.52726 | 0.193022 | -2.73163 | 0.007463 | 0.03342  | 1 |
| ENSG0000 response | Inflamed | RP11-399t  | lincRNA chr9     | 1.38E+08 | 1.38E+08 | - | 886   | 2.455847 | 0.491647 | -0.43671 | 0.159891 | -2.73128 | 0.007471 | 0.033447 | 1 |
| ENSG0000 response | Inflamed | TRBV9      | TR_V_gene chr7   | 1.42E+08 | 1.42E+08 | - | 390   | 21.09308 | 0.019093 | -0.50019 | 0.183142 | -2.73116 | 0.007473 | 0.033452 | 1 |

|                   |          |            |                      |          |          |   |      |          |          |          |          |          |          |          |   |
|-------------------|----------|------------|----------------------|----------|----------|---|------|----------|----------|----------|----------|----------|----------|----------|---|
| ENSG0000 response | Inflamed | D2HGDH     | protein_cc chr2      | 2.43E+08 | 2.43E+08 | + | 5279 | 1762.778 | 0        | 0.411834 | 0.150851 | 2.73007  | 0.007496 | 0.03355  | 1 |
| ENSG0000 response | Inflamed | RP11-57H1  | protein_cc chr1      | 95583479 | 95712781 | + | 1961 | 2.164678 | 0.50358  | 0.312312 | 0.114427 | 2.72935  | 0.007511 | 0.033612 | 1 |
| ENSG0000 response | Inflamed | PCBD1      | protein_cc chr10     | 72642037 | 72648541 | - | 1614 | 1893.926 | 0        | 0.273626 | 0.100258 | 2.729236 | 0.007514 | 0.033617 | 1 |
| ENSG0000 response | Inflamed | CTD-2192J  | protein_cc chr19     | 12754645 | 12759211 | - | 838  | 3.97136  | 0.205251 | -0.33825 | 0.123978 | -2.72829 | 0.007534 | 0.033701 | 1 |
| ENSG0000 response | Inflamed | MXRA7      | protein_cc chr17     | 74668633 | 74707098 | - | 9257 | 1550.776 | 0        | -0.43359 | 0.15895  | -2.72784 | 0.007543 | 0.033739 | 1 |
| ENSG0000 response | Inflamed | CCL21      | protein_cc chr9      | 34709002 | 34710121 | - | 924  | 2589.551 | 0.004773 | -1.22529 | 0.449243 | -2.72746 | 0.007551 | 0.033763 | 1 |
| ENSG0000 response | Inflamed | LAMTOR3    | protein_cc chr4      | 1.01E+08 | 1.01E+08 | - | 4226 | 1017.053 | 0        | 0.310812 | 0.113957 | 2.727447 | 0.007552 | 0.033763 | 1 |
| ENSG0000 response | Inflamed | COX6A1     | protein_cc chr12     | 1.21E+08 | 1.21E+08 | + | 1344 | 4010.284 | 0        | 0.350689 | 0.128581 | 2.727384 | 0.007553 | 0.033763 | 1 |
| ENSG0000 response | Inflamed | CPA4       | protein_cc chr7      | 1.3E+08  | 1.3E+08  | + | 3958 | 2.374702 | 0.541766 | -0.47088 | 0.172652 | -2.72734 | 0.007554 | 0.033763 | 1 |
| ENSG0000 response | Inflamed | RP11-498E  | lincRNA chr9         | 1.25E+08 | 1.25E+08 | + | 477  | 15.35561 | 0.02148  | 0.398601 | 0.146176 | 2.72686  | 0.007564 | 0.033803 | 1 |
| ENSG0000 response | Inflamed | RP11-164F  | antisense chr4       | 1.53E+08 | 1.53E+08 | + | 2565 | 11.26969 | 0.167064 | 0.643492 | 0.235999 | 2.72667  | 0.007568 | 0.033815 | 1 |
| ENSG0000 response | Inflamed | SHE        | protein_cc chr1      | 1.54E+08 | 1.54E+08 | - | 8441 | 472.9523 | 0        | -0.42993 | 0.157687 | -2.72648 | 0.007572 | 0.033827 | 1 |
| ENSG0000 response | Inflamed | PACRG      | protein_cc chr6      | 1.63E+08 | 1.64E+08 | + | 2573 | 7.754177 | 0.083532 | 0.46069  | 0.168973 | 2.726405 | 0.007574 | 0.033829 | 1 |
| ENSG0000 response | Inflamed | HS3ST3B1   | protein_cc chr17     | 14204400 | 14252721 | + | 5367 | 408.716  | 0        | -0.50799 | 0.186326 | -2.72633 | 0.007575 | 0.03383  | 1 |
| ENSG0000 response | Inflamed | CDC14A     | protein_cc chr1      | 1.01E+08 | 1.01E+08 | + | 5729 | 413.389  | 0.002387 | 0.576333 | 0.211403 | 2.726229 | 0.007578 | 0.033834 | 1 |
| ENSG0000 response | Inflamed | TRBV5-4    | TR_V_gene chr7       | 1.42E+08 | 1.42E+08 | - | 544  | 13.48687 | 0.066826 | -0.48507 | 0.177933 | -2.72612 | 0.00758  | 0.033839 | 1 |
| ENSG0000 response | Inflamed | CT62       | protein_cc chr15     | 71402583 | 71407833 | - | 2849 | 0.918854 | 0.761337 | 0.282075 | 0.103487 | 2.725709 | 0.007589 | 0.033872 | 1 |
| ENSG0000 response | Inflamed | RP11-336A  | lincRNA chr10        | 5650438  | 5652756  | - | 613  | 13.09547 | 0.052506 | 0.499708 | 0.183345 | 2.725508 | 0.007593 | 0.033886 | 1 |
| ENSG0000 response | Inflamed | NKPD1      | protein_cc chr19     | 45653008 | 45663408 | - | 4764 | 7.210024 | 0.085919 | -0.46022 | 0.168863 | -2.72541 | 0.007595 | 0.033889 | 1 |
| ENSG0000 response | Inflamed | TRERF1     | protein_cc chr6      | 42192669 | 42419789 | - | 7732 | 1009.878 | 0        | -0.44071 | 0.161718 | -2.72518 | 0.0076   | 0.033905 | 1 |
| ENSG0000 response | Inflamed | MIIP       | protein_cc chr1      | 12079523 | 12092102 | + | 2821 | 846.8282 | 0        | -0.22609 | 0.082985 | -2.72447 | 0.007615 | 0.033967 | 1 |
| ENSG0000 response | Inflamed | ALG2       | protein_cc chr9      | 1.02E+08 | 1.02E+08 | - | 2980 | 1603.823 | 0        | -0.22364 | 0.082092 | -2.72424 | 0.00762  | 0.033984 | 1 |
| ENSG0000 response | Inflamed | QRFPR      | protein_cc chr4      | 1.22E+08 | 1.22E+08 | - | 2160 | 2.181384 | 0.75895  | -0.51659 | 0.189646 | -2.72395 | 0.007626 | 0.034006 | 1 |
| ENSG0000 response | Inflamed | SPAG16     | protein_cc chr2      | 2.14E+08 | 2.15E+08 | + | 8335 | 281.0191 | 0        | 0.342363 | 0.125715 | 2.72333  | 0.00764  | 0.034059 | 1 |
| ENSG0000 response | Inflamed | RP11-439L  | lincRNA chr6         | 1.43E+08 | 1.43E+08 | + | 554  | 2.412888 | 0.494033 | -0.37511 | 0.137772 | -2.72267 | 0.007654 | 0.034117 | 1 |
| ENSG0000 response | Inflamed | ESPNP      | pseudogene chr1      | 17013834 | 17046652 | - | 3178 | 9.00716  | 0.272076 | 0.520394 | 0.191148 | 2.722472 | 0.007658 | 0.03413  | 1 |
| ENSG0000 response | Inflamed | ELL3       | protein_cc chr15     | 44064798 | 44069741 | - | 2880 | 59.11695 | 0.009547 | 0.553888 | 0.203524 | 2.721484 | 0.007679 | 0.034219 | 1 |
| ENSG0000 response | Inflamed | EPAS1      | protein_cc chr2      | 46520806 | 46613836 | + | 7296 | 16410.36 | 0        | -0.34666 | 0.127408 | -2.72083 | 0.007693 | 0.034276 | 1 |
| ENSG0000 response | Inflamed | VDAC2      | protein_cc chr10     | 76969912 | 76991206 | + | 2827 | 4903.647 | 0        | 0.242829 | 0.08926  | 2.720468 | 0.007701 | 0.034305 | 1 |
| ENSG0000 response | Inflamed | CTD-2034I  | lincRNA chr15        | 81846344 | 81989121 | + | 1087 | 1.785203 | 0.596659 | -0.36773 | 0.135194 | -2.72003 | 0.007711 | 0.034342 | 1 |
| ENSG0000 response | Inflamed | SLC9A3R1   | protein_cc chr17     | 72744791 | 72765492 | + | 2315 | 8302.327 | 0        | 0.363325 | 0.133608 | 2.719344 | 0.007726 | 0.034402 | 1 |
| ENSG0000 response | Inflamed | ARL3       | protein_cc chr10     | 1.04E+08 | 1.04E+08 | - | 3844 | 396.2458 | 0        | -0.24127 | 0.088728 | -2.71924 | 0.007728 | 0.034406 | 1 |
| ENSG0000 response | Inflamed | RAB44      | protein_cc chr6      | 36683256 | 36699870 | + | 2747 | 79.7327  | 0.009547 | -0.54859 | 0.201785 | -2.71867 | 0.00774  | 0.034456 | 1 |
| ENSG0000 response | Inflamed | SCNN1G     | protein_cc chr16     | 23194036 | 23228204 | + | 3507 | 358.3198 | 0.019093 | 1.170532 | 0.4306   | 2.718376 | 0.007747 | 0.034475 | 1 |
| ENSG0000 response | Inflamed | DRAP1      | protein_cc chr11     | 65686728 | 65689032 | + | 1737 | 1518.384 | 0        | -0.22685 | 0.083453 | -2.71835 | 0.007747 | 0.034475 | 1 |
| ENSG0000 response | Inflamed | IQCJ-SCHIF | protein_cc chr3      | 1.59E+08 | 1.6E+08  | + | 4409 | 26.01432 | 0.019093 | -0.52755 | 0.194098 | -2.71798 | 0.007755 | 0.034505 | 1 |
| ENSG0000 response | Inflamed | KCNIP4     | protein_cc chr4      | 20730239 | 21950422 | - | 4112 | 16.5537  | 0.112172 | 0.737733 | 0.271433 | 2.717918 | 0.007757 | 0.034505 | 1 |
| ENSG0000 response | Inflamed | XRCC1      | protein_cc chr19     | 44047192 | 44084625 | - | 3459 | 962.9332 | 0        | -0.19876 | 0.073131 | -2.71783 | 0.007759 | 0.034508 | 1 |
| ENSG0000 response | Inflamed | ETFDH      | protein_cc chr4      | 1.6E+08  | 1.6E+08  | + | 4493 | 1232.37  | 0        | 0.399404 | 0.146971 | 2.71758  | 0.007764 | 0.034522 | 1 |
| ENSG0000 response | Inflamed | TRBV29OR   | IG_V_pseudogene chr9 | 33786526 | 33786826 | + | 301  | 5.22673  | 0.260143 | 0.516835 | 0.190183 | 2.717568 | 0.007764 | 0.034522 | 1 |

|                   |          |           |            |       |          |          |   |      |          |          |          |          |          |          |          |   |
|-------------------|----------|-----------|------------|-------|----------|----------|---|------|----------|----------|----------|----------|----------|----------|----------|---|
| ENSG0000 response | Inflamed | RP11-111M | lincRNA    | chr11 | 76152382 | 76155700 | - | 754  | 93.18616 | 0        | 0.292581 | 0.107695 | 2.716766 | 0.007782 | 0.034593 | 1 |
| ENSG0000 response | Inflamed | FST       | protein_cc | chr5  | 52776239 | 52782964 | + | 2969 | 158.2554 | 0.004773 | -0.81878 | 0.301393 | -2.71667 | 0.007784 | 0.034597 | 1 |
| ENSG0000 response | Inflamed | AARS      | protein_cc | chr16 | 70286198 | 70323446 | - | 4498 | 4630.764 | 0        | -0.2885  | 0.10621  | -2.71631 | 0.007792 | 0.034626 | 1 |
| ENSG0000 response | Inflamed | RP11-466F | sense_intr | chr17 | 30839887 | 30846368 | - | 420  | 3.093079 | 0.293556 | 0.380619 | 0.140147 | 2.71585  | 0.007802 | 0.034663 | 1 |
| ENSG0000 response | Inflamed | DMBX1     | protein_cc | chr1  | 46972668 | 46979898 | + | 2896 | 1.539379 | 0.675418 | -0.43776 | 0.16119  | -2.71581 | 0.007803 | 0.034663 | 1 |
| ENSG0000 response | Inflamed | CAMK2D    | protein_cc | chr4  | 1.14E+08 | 1.15E+08 | - | 7363 | 2121.699 | 0        | 0.467979 | 0.172328 | 2.715635 | 0.007807 | 0.034674 | 1 |
| ENSG0000 response | Inflamed | RP11-305F | lincRNA    | chr20 | 61640735 | 61716423 | + | 3936 | 1.100239 | 0.739857 | -0.3422  | 0.12602  | -2.71544 | 0.007811 | 0.034687 | 1 |
| ENSG0000 response | Inflamed | VPS37B    | protein_cc | chr12 | 1.23E+08 | 1.23E+08 | - | 5946 | 5678.177 | 0        | 0.222784 | 0.082059 | 2.714909 | 0.007823 | 0.034733 | 1 |
| ENSG0000 response | Inflamed | RP11-385F | lincRNA    | chr6  | 47444979 | 47445308 | - | 330  | 19.00716 | 0.009547 | 0.390274 | 0.143765 | 2.714668 | 0.007828 | 0.034746 | 1 |
| ENSG0000 response | Inflamed | AC002511  | lincRNA    | chr19 | 35914964 | 35915554 | - | 450  | 41.28878 | 0.009547 | 0.611428 | 0.225232 | 2.714658 | 0.007828 | 0.034746 | 1 |
| ENSG0000 response | Inflamed | RP1-228H  | sense_ove  | chr1  | 40929991 | 40932436 | + | 2446 | 63.37947 | 0.01432  | -0.54236 | 0.199802 | -2.71449 | 0.007832 | 0.034756 | 1 |
| ENSG0000 response | Inflamed | ADAMDEC   | protein_cc | chr8  | 24241798 | 24263526 | + | 2438 | 10093.51 | 0        | 0.67348  | 0.248304 | 2.712319 | 0.00788  | 0.034963 | 1 |
| ENSG0000 response | Inflamed | PRR22     | protein_cc | chr19 | 5782971  | 5784776  | - | 1806 | 87.51551 | 0        | 0.337053 | 0.124284 | 2.711944 | 0.007888 | 0.034994 | 1 |
| ENSG0000 response | Inflamed | RN7SKP11  | misc_RNA   | chr6  | 47683019 | 47683337 | + | 319  | 1.813842 | 0.579952 | 0.378785 | 0.139677 | 2.711854 | 0.00789  | 0.034997 | 1 |
| ENSG0000 response | Inflamed | RP5-965F6 | lincRNA    | chr1  | 1.13E+08 | 1.13E+08 | - | 547  | 3.324582 | 0.312649 | 0.41786  | 0.154114 | 2.711368 | 0.007901 | 0.035039 | 1 |
| ENSG0000 response | Inflamed | RP1-159A1 | antisense  | chr1  | 27852316 | 27857072 | + | 283  | 4.937947 | 0.157518 | 0.396905 | 0.14639  | 2.711277 | 0.007903 | 0.035042 | 1 |
| ENSG0000 response | Inflamed | BVES      | protein_cc | chr6  | 1.06E+08 | 1.06E+08 | - | 5808 | 118.9499 | 0.011933 | -0.58714 | 0.216564 | -2.71117 | 0.007905 | 0.035046 | 1 |
| ENSG0000 response | Inflamed | GNG10     | protein_cc | chr9  | 1.14E+08 | 1.14E+08 | + | 1491 | 95.36754 | 0        | -0.36285 | 0.133851 | -2.71086 | 0.007912 | 0.035069 | 1 |
| ENSG0000 response | Inflamed | HS3ST1    | protein_cc | chr4  | 11394774 | 11431389 | - | 8166 | 534.1313 | 0        | -0.32666 | 0.120503 | -2.71082 | 0.007913 | 0.035069 | 1 |
| ENSG0000 response | Inflamed | RP11-443C | lincRNA    | chr5  | 1.79E+08 | 1.79E+08 | - | 624  | 2.763723 | 0.441527 | -0.4007  | 0.147821 | -2.71072 | 0.007915 | 0.035073 | 1 |
| ENSG0000 response | Inflamed | CR2       | protein_cc | chr1  | 2.08E+08 | 2.08E+08 | + | 4885 | 1274.301 | 0.002387 | -1.22702 | 0.452676 | -2.71058 | 0.007918 | 0.03508  | 1 |
| ENSG0000 response | Inflamed | IGFBPL1   | protein_cc | chr9  | 38408991 | 38424444 | - | 1093 | 11.7852  | 0.042959 | -0.4319  | 0.159366 | -2.71011 | 0.007929 | 0.035121 | 1 |
| ENSG0000 response | Inflamed | SERPIND1  | protein_cc | chr22 | 21128167 | 21142008 | + | 2553 | 6.272076 | 0.374702 | -0.67406 | 0.248742 | -2.70987 | 0.007934 | 0.035138 | 1 |
| ENSG0000 response | Inflamed | DEFB4B    | protein_cc | chr8  | 7272382  | 7274385  | - | 332  | 5.224344 | 0.742243 | -0.57747 | 0.213132 | -2.70944 | 0.007944 | 0.035173 | 1 |
| ENSG0000 response | Inflamed | NDE1      | protein_cc | chr16 | 15737124 | 15820210 | + | 8035 | 1280.229 | 0        | -0.27788 | 0.10256  | -2.7094  | 0.007944 | 0.035173 | 1 |
| ENSG0000 response | Inflamed | C1orf101  | protein_cc | chr1  | 2.45E+08 | 2.45E+08 | + | 4328 | 11.55131 | 0.078759 | -0.515   | 0.190088 | -2.7093  | 0.007947 | 0.035177 | 1 |
| ENSG0000 response | Inflamed | FAM124B   | protein_cc | chr2  | 2.25E+08 | 2.25E+08 | - | 3541 | 38.74463 | 0.016706 | -0.53185 | 0.196342 | -2.70877 | 0.007958 | 0.035223 | 1 |
| ENSG0000 response | Inflamed | DHX58     | protein_cc | chr17 | 40253422 | 40264751 | - | 3843 | 613.1026 | 0        | -0.2956  | 0.109142 | -2.70837 | 0.007967 | 0.035256 | 1 |
| ENSG0000 response | Inflamed | AP000350  | lincRNA    | chr22 | 24243619 | 24249255 | - | 5637 | 141.1026 | 0.24821  | 0.738465 | 0.272682 | 2.708152 | 0.007972 | 0.035268 | 1 |
| ENSG0000 response | Inflamed | TERF2IP   | protein_cc | chr16 | 75681684 | 75795770 | + | 3379 | 1741.255 | 0        | -0.25185 | 0.092999 | -2.70809 | 0.007974 | 0.035268 | 1 |
| ENSG0000 response | Inflamed | KANK4     | protein_cc | chr1  | 62702651 | 62785085 | - | 5980 | 70.80191 | 0.0358   | 0.847718 | 0.313033 | 2.70808  | 0.007974 | 0.035268 | 1 |
| ENSG0000 response | Inflamed | KATNAL1   | protein_cc | chr13 | 30776767 | 30881621 | - | 8105 | 167.253  | 0        | -0.51518 | 0.190268 | -2.70767 | 0.007983 | 0.035302 | 1 |
| ENSG0000 response | Inflamed | TRAV6     | TR_V_gene  | chr14 | 22236729 | 22237320 | + | 404  | 5.885442 | 0.202864 | -0.49211 | 0.181753 | -2.70757 | 0.007985 | 0.035304 | 1 |
| ENSG0000 response | Inflamed | PCDHAC2   | protein_cc | chr5  | 1.4E+08  | 1.4E+08  | + | 5970 | 20.56563 | 0.088305 | -0.69708 | 0.257458 | -2.70754 | 0.007986 | 0.035304 | 1 |
| ENSG0000 response | Inflamed | EID2B     | protein_cc | chr19 | 40021630 | 40023494 | - | 1865 | 35.27446 | 0.00716  | -0.40541 | 0.149754 | -2.7072  | 0.007993 | 0.035331 | 1 |
| ENSG0000 response | Inflamed | NCR3LG1   | protein_cc | chr11 | 17373273 | 17398888 | + | 6438 | 720.0597 | 0.011933 | 0.636225 | 0.235029 | 2.707    | 0.007998 | 0.035345 | 1 |
| ENSG0000 response | Inflamed | ADM5      | protein_cc | chr19 | 50191921 | 50193832 | + | 1718 | 45.44391 | 0        | -0.36843 | 0.13612  | -2.70669 | 0.008005 | 0.03537  | 1 |
| ENSG0000 response | Inflamed | ART1      | protein_cc | chr11 | 3666358  | 3685646  | + | 1467 | 2.002387 | 0.75895  | 0.311914 | 0.115254 | 2.70633  | 0.008013 | 0.035399 | 1 |
| ENSG0000 response | Inflamed | SPRR2A    | protein_cc | chr1  | 1.53E+08 | 1.53E+08 | - | 709  | 15.94033 | 0.642005 | -0.96983 | 0.358372 | -2.70621 | 0.008016 | 0.035406 | 1 |
| ENSG0000 response | Inflamed | RP11-276F | antisense  | chr1  | 16485761 | 16488378 | + | 544  | 30.49403 | 0.02864  | 0.436251 | 0.161218 | 2.705961 | 0.008021 | 0.035424 | 1 |

|                   |          |           |            |       |          |          |   |       |          |          |          |          |          |          |          |   |
|-------------------|----------|-----------|------------|-------|----------|----------|---|-------|----------|----------|----------|----------|----------|----------|----------|---|
| ENSG0000 response | Inflamed | RP11-180M | lincRNA    | chr3  | 21453714 | 21455436 | - | 1723  | 6.883055 | 0.243437 | -0.59041 | 0.218219 | -2.70558 | 0.00803  | 0.035454 | 1 |
| ENSG0000 response | Inflamed | CHMP1A    | protein_cc | chr16 | 89710839 | 89724253 | - | 3208  | 5899.389 | 0        | 0.188787 | 0.069778 | 2.705542 | 0.008031 | 0.035454 | 1 |
| ENSG0000 response | Inflamed | THNSL1    | protein_cc | chr10 | 25305587 | 25315593 | + | 3788  | 148.5298 | 0        | 0.403464 | 0.149144 | 2.705207 | 0.008038 | 0.035481 | 1 |
| ENSG0000 response | Inflamed | RP11-484L | antisense  | chr18 | 46352422 | 46361141 | - | 877   | 1.295943 | 0.663484 | -0.29673 | 0.109738 | -2.70395 | 0.008067 | 0.0356   | 1 |
| ENSG0000 response | Inflamed | COPZ2     | protein_cc | chr17 | 46103533 | 46115392 | - | 1847  | 148.2172 | 0        | -0.37362 | 0.138195 | -2.70354 | 0.008076 | 0.035635 | 1 |
| ENSG0000 response | Inflamed | SNORA53   | snoRNA     | chr12 | 98993413 | 98993661 | + | 249   | 4.298329 | 0.212411 | 0.381413 | 0.14109  | 2.703328 | 0.008081 | 0.03565  | 1 |
| ENSG0000 response | Inflamed | EFEMP1    | protein_cc | chr2  | 56093102 | 56151274 | - | 4244  | 1154.346 | 0        | -0.58304 | 0.215685 | -2.70319 | 0.008084 | 0.035652 | 1 |
| ENSG0000 response | Inflamed | CTD-3088C | protein_cc | chr16 | 11453702 | 11617444 | - | 12004 | 177.0525 | 0.004773 | -0.70997 | 0.262646 | -2.70316 | 0.008084 | 0.035652 | 1 |
| ENSG0000 response | Inflamed | TMED9     | protein_cc | chr5  | 1.77E+08 | 1.77E+08 | + | 2440  | 5756.668 | 0        | -0.18969 | 0.070175 | -2.70313 | 0.008085 | 0.035652 | 1 |
| ENSG0000 response | Inflamed | FBLIM1    | protein_cc | chr1  | 16083102 | 16113089 | + | 4716  | 8975.709 | 0        | 0.280434 | 0.103748 | 2.703028 | 0.008087 | 0.035656 | 1 |
| ENSG0000 response | Inflamed | NSMF      | protein_cc | chr9  | 1.4E+08  | 1.4E+08  | - | 4974  | 2980.091 | 0        | 0.279759 | 0.103508 | 2.70277  | 0.008093 | 0.035676 | 1 |
| ENSG0000 response | Inflamed | NRG1      | protein_cc | chr8  | 31496902 | 32622548 | + | 7657  | 794.2673 | 0        | -0.60615 | 0.224296 | -2.70243 | 0.008101 | 0.035701 | 1 |
| ENSG0000 response | Inflamed | RP4-794H  | lincRNA    | chr1  | 59348540 | 59362375 | - | 1249  | 36.77088 | 0        | 0.311388 | 0.115227 | 2.702379 | 0.008102 | 0.035701 | 1 |
| ENSG0000 response | Inflamed | RP11-57A1 | lincRNA    | chr16 | 28296206 | 28303385 | - | 2481  | 5.365155 | 0.200477 | 0.44611  | 0.165083 | 2.702337 | 0.008103 | 0.035701 | 1 |
| ENSG0000 response | Inflamed | LMF2      | protein_cc | chr22 | 50941376 | 50946135 | - | 3071  | 4134.024 | 0        | -0.23497 | 0.086972 | -2.70165 | 0.008119 | 0.035764 | 1 |
| ENSG0000 response | Inflamed | RP11-30P6 | lincRNA    | chr6  | 86096937 | 86099904 | - | 2513  | 194.3126 | 0.00716  | 0.742518 | 0.274889 | 2.701156 | 0.00813  | 0.035794 | 1 |
| ENSG0000 response | Inflamed | SLMO2     | protein_cc | chr20 | 57608200 | 57617964 | - | 2977  | 2417.072 | 0        | 0.395109 | 0.146274 | 2.701149 | 0.00813  | 0.035794 | 1 |
| ENSG0000 response | Inflamed | TNFSF18   | protein_cc | chr1  | 1.73E+08 | 1.73E+08 | - | 2008  | 8.782816 | 0.145585 | 0.586507 | 0.217133 | 2.701137 | 0.00813  | 0.035794 | 1 |
| ENSG0000 response | Inflamed | TYK2      | protein_cc | chr19 | 10461209 | 10491352 | - | 6687  | 4822.138 | 0        | -0.25139 | 0.093069 | -2.70111 | 0.008131 | 0.035794 | 1 |
| ENSG0000 response | Inflamed | INGX      | pseudoger  | chrX  | 70711529 | 70712778 | - | 1250  | 1.630072 | 0.572792 | -0.34338 | 0.127132 | -2.70094 | 0.008135 | 0.035804 | 1 |
| ENSG0000 response | Inflamed | RP11-164H | antisense  | chr14 | 96178084 | 96223993 | + | 3017  | 12.2864  | 0.470167 | -0.75137 | 0.278219 | -2.70065 | 0.008141 | 0.035827 | 1 |
| ENSG0000 response | Inflamed | RP11-388C | sense_intr | chr17 | 80702944 | 80703585 | + | 642   | 19.07876 | 0.078759 | 0.557721 | 0.206534 | 2.700382 | 0.008147 | 0.035849 | 1 |
| ENSG0000 response | Inflamed | AL627309  | protein_cc | chr1  | 134901   | 139379   | - | 2661  | 396.5418 | 0.00716  | -0.73243 | 0.271277 | -2.69994 | 0.008158 | 0.035887 | 1 |
| ENSG0000 response | Inflamed | CCNG1     | protein_cc | chr5  | 1.63E+08 | 1.63E+08 | + | 3096  | 2103.988 | 0        | 0.328572 | 0.121705 | 2.699744 | 0.008162 | 0.035901 | 1 |
| ENSG0000 response | Inflamed | SNORA40   | lincRNA    | chr12 | 1.09E+08 | 1.09E+08 | - | 2275  | 30.02625 | 0.009547 | -0.32203 | 0.119295 | -2.69946 | 0.008168 | 0.035923 | 1 |
| ENSG0000 response | Inflamed | GLB1L3    | protein_cc | chr11 | 1.34E+08 | 1.34E+08 | + | 8945  | 3.470167 | 0.458234 | -0.44615 | 0.165288 | -2.69923 | 0.008174 | 0.035941 | 1 |
| ENSG0000 response | Inflamed | RP11-466F | lincRNA    | chr5  | 75627662 | 75629781 | + | 2120  | 5.27685  | 0.27685  | 0.477755 | 0.177033 | 2.698678 | 0.008186 | 0.03599  | 1 |
| ENSG0000 response | Inflamed | CISH      | protein_cc | chr3  | 50643921 | 50649262 | - | 5112  | 1096.513 | 0        | -0.25119 | 0.093096 | -2.69822 | 0.008197 | 0.03603  | 1 |
| ENSG0000 response | Inflamed | LINC0093C | lincRNA    | chr15 | 93111048 | 93115272 | - | 1657  | 19.32458 | 0.097852 | 0.678638 | 0.251583 | 2.69747  | 0.008214 | 0.0361   | 1 |
| ENSG0000 response | Inflamed | GIPC3     | protein_cc | chr19 | 3585551  | 3593539  | + | 4335  | 270.6181 | 0        | -0.55377 | 0.205338 | -2.69686 | 0.008228 | 0.036155 | 1 |
| ENSG0000 response | Inflamed | CTB-60B18 | lincRNA    | chr19 | 49521504 | 49522741 | - | 493   | 2.446301 | 0.477327 | -0.40182 | 0.149033 | -2.69617 | 0.008244 | 0.036219 | 1 |
| ENSG0000 response | Inflamed | RP11-1246 | lincRNA    | chr7  | 1504133  | 1507158  | - | 3026  | 132.1193 | 0.009547 | 0.422047 | 0.156544 | 2.696026 | 0.008247 | 0.036227 | 1 |
| ENSG0000 response | Inflamed | DRD4      | protein_cc | chr11 | 637293   | 640706   | + | 1477  | 18.31742 | 0.00716  | 0.356352 | 0.132196 | 2.695632 | 0.008256 | 0.036255 | 1 |
| ENSG0000 response | Inflamed | OR8R1P    | pseudoger  | chr11 | 72959824 | 72960912 | + | 764   | 1.821002 | 0.551313 | -0.34222 | 0.126954 | -2.69563 | 0.008256 | 0.036255 | 1 |
| ENSG0000 response | Inflamed | MAMDC2    | protein_cc | chr9  | 72658497 | 72841886 | + | 3854  | 289.8878 | 0.009547 | 0.841583 | 0.312221 | 2.695469 | 0.00826  | 0.036265 | 1 |
| ENSG0000 response | Inflamed | GPR173    | protein_cc | chrX  | 53078273 | 53109797 | + | 4608  | 126.5943 | 0.002387 | -0.51833 | 0.192322 | -2.6951  | 0.008269 | 0.036296 | 1 |
| ENSG0000 response | Inflamed | RP11-575H | lincRNA    | chr9  | 27829274 | 27844479 | + | 2084  | 1.854415 | 0.620525 | 0.289377 | 0.107383 | 2.694818 | 0.008275 | 0.036319 | 1 |
| ENSG0000 response | Inflamed | GPR52     | protein_cc | chr1  | 1.74E+08 | 1.74E+08 | + | 1472  | 0.933174 | 0.747017 | -0.28854 | 0.107077 | -2.69469 | 0.008278 | 0.036326 | 1 |
| ENSG0000 response | Inflamed | GLOD4     | protein_cc | chr17 | 660337   | 685581   | - | 4951  | 1727.019 | 0        | 0.268309 | 0.099583 | 2.694334 | 0.008286 | 0.036356 | 1 |
| ENSG0000 response | Inflamed | DNMT1     | protein_cc | chr19 | 10244021 | 10341962 | - | 9805  | 3504.704 | 0        | -0.32292 | 0.119886 | -2.69358 | 0.008304 | 0.036427 | 1 |

|                   |          |           |                  |          |          |   |       |          |          |          |          |          |          |          |   |
|-------------------|----------|-----------|------------------|----------|----------|---|-------|----------|----------|----------|----------|----------|----------|----------|---|
| ENSG0000 response | Inflamed | ARHGAP31  | protein_cc chr3  | 1.19E+08 | 1.19E+08 | + | 9384  | 2291.857 | 0        | -0.37632 | 0.139717 | -2.69343 | 0.008307 | 0.036436 | 1 |
| ENSG0000 response | Inflamed | FRMD3     | protein_cc chr9  | 85857905 | 86153461 | - | 6361  | 701.3294 | 0        | 0.561401 | 0.208465 | 2.69303  | 0.008317 | 0.036471 | 1 |
| ENSG0000 response | Inflamed | SLC6A4    | protein_cc chr17 | 28521337 | 28563020 | - | 6983  | 99.31026 | 0.279236 | 0.816904 | 0.30345  | 2.692057 | 0.008339 | 0.036558 | 1 |
| ENSG0000 response | Inflamed | RP5-1172f | lincRNA chr22    | 27617310 | 27620688 | - | 975   | 2.727924 | 0.429594 | -0.4216  | 0.15661  | -2.69205 | 0.008339 | 0.036558 | 1 |
| ENSG0000 response | Inflamed | TMEM200   | protein_cc chr6  | 1.31E+08 | 1.31E+08 | + | 6131  | 921.2792 | 0        | 0.57937  | 0.215292 | 2.691097 | 0.008361 | 0.036649 | 1 |
| ENSG0000 response | Inflamed | ZC2HC1C   | protein_cc chr14 | 75530873 | 75545126 | + | 3248  | 91.04535 | 0        | 0.338391 | 0.125773 | 2.690479 | 0.008376 | 0.036707 | 1 |
| ENSG0000 response | Inflamed | TRBV7-6   | TR_V_gene chr7   | 1.42E+08 | 1.42E+08 | - | 392   | 7.403341 | 0.169451 | -0.45116 | 0.1677   | -2.6903  | 0.00838  | 0.036719 | 1 |
| ENSG0000 response | Inflamed | RP11-734k | lincRNA chr2     | 9246722  | 9249994  | + | 3273  | 9.470167 | 0.236277 | 0.67167  | 0.249678 | 2.690144 | 0.008384 | 0.036729 | 1 |
| ENSG0000 response | Inflamed | EIF4A1P7  | pseudoger chr13  | 29172970 | 29174189 | + | 1220  | 2.381862 | 0.384248 | -0.29906 | 0.11118  | -2.68987 | 0.00839  | 0.036751 | 1 |
| ENSG0000 response | Inflamed | NEK3      | protein_cc chr13 | 52706775 | 52733996 | - | 4272  | 731.6874 | 0        | 0.461091 | 0.171434 | 2.689613 | 0.008396 | 0.036771 | 1 |
| ENSG0000 response | Inflamed | MIR559    | miRNA chr2       | 47604814 | 47604909 | + | 96    | 13.86396 | 0.136038 | 0.607224 | 0.225779 | 2.689462 | 0.0084   | 0.036776 | 1 |
| ENSG0000 response | Inflamed | SERPINA3  | protein_cc chr14 | 95078714 | 95090392 | + | 4504  | 19.2315  | 0.315036 | -0.93807 | 0.348797 | -2.68944 | 0.0084   | 0.036776 | 1 |
| ENSG0000 response | Inflamed | FPR3      | protein_cc chr19 | 52298416 | 52329442 | + | 2772  | 1111.809 | 0        | -0.4293  | 0.159635 | -2.68926 | 0.008404 | 0.036786 | 1 |
| ENSG0000 response | Inflamed | RP11-351f | lincRNA chr10    | 43632272 | 43633782 | - | 1511  | 13.08831 | 0.0358   | -0.46891 | 0.174367 | -2.68923 | 0.008405 | 0.036786 | 1 |
| ENSG0000 response | Inflamed | RP11-134f | lincRNA chr12    | 14369524 | 14374231 | + | 640   | 2.651551 | 0.443914 | -0.4337  | 0.161284 | -2.68905 | 0.008409 | 0.036798 | 1 |
| ENSG0000 response | Inflamed | IL5       | protein_cc chr5  | 1.32E+08 | 1.32E+08 | - | 1587  | 2.453461 | 0.651551 | -0.51543 | 0.191694 | -2.68881 | 0.008415 | 0.036816 | 1 |
| ENSG0000 response | Inflamed | MRPS35    | protein_cc chr12 | 27863706 | 27909228 | + | 1979  | 1868.253 | 0        | 0.297251 | 0.110553 | 2.688757 | 0.008416 | 0.036816 | 1 |
| ENSG0000 response | Inflamed | DISC1     | protein_cc chr1  | 2.32E+08 | 2.32E+08 | + | 12137 | 217.3317 | 0.004773 | -0.45891 | 0.170681 | -2.68869 | 0.008418 | 0.036817 | 1 |
| ENSG0000 response | Inflamed | LCAT      | protein_cc chr16 | 67973653 | 67978034 | - | 2625  | 211.4057 | 0        | -0.44993 | 0.167353 | -2.68852 | 0.008422 | 0.036828 | 1 |
| ENSG0000 response | Inflamed | TMPRSS13  | protein_cc chr11 | 1.18E+08 | 1.18E+08 | - | 5367  | 76.59189 | 0        | -0.37433 | 0.139272 | -2.68775 | 0.00844  | 0.036901 | 1 |
| ENSG0000 response | Inflamed | OR5G5P    | pseudoger chr11  | 56569332 | 56587184 | - | 1081  | 3.147971 | 0.534606 | 0.425269 | 0.158234 | 2.687602 | 0.008443 | 0.03691  | 1 |
| ENSG0000 response | Inflamed | HSPA1B    | protein_cc chr6  | 31795512 | 31798031 | + | 2520  | 2743.89  | 0        | 0.338332 | 0.125912 | 2.687057 | 0.008456 | 0.036957 | 1 |
| ENSG0000 response | Inflamed | SEPHS2    | protein_cc chr16 | 30454952 | 30457502 | - | 2551  | 4207.959 | 0        | 0.28106  | 0.104599 | 2.687022 | 0.008457 | 0.036957 | 1 |
| ENSG0000 response | Inflamed | GAB3      | protein_cc chrX  | 1.54E+08 | 1.54E+08 | - | 5269  | 365.5871 | 0        | -0.47306 | 0.176069 | -2.68678 | 0.008463 | 0.036973 | 1 |
| ENSG0000 response | Inflamed | CYP1B1    | protein_cc chr2  | 38294116 | 38337044 | - | 6011  | 108.6253 | 0.016706 | -0.65919 | 0.245349 | -2.68675 | 0.008463 | 0.036973 | 1 |
| ENSG0000 response | Inflamed | RILP      | protein_cc chr17 | 1549444  | 1553371  | - | 2098  | 1139.146 | 0        | 0.250111 | 0.093096 | 2.686606 | 0.008467 | 0.036982 | 1 |
| ENSG0000 response | Inflamed | CHMP3     | protein_cc chr2  | 86730554 | 86948245 | - | 7393  | 2758.845 | 0        | 0.34841  | 0.129693 | 2.686418 | 0.008471 | 0.036988 | 1 |
| ENSG0000 response | Inflamed | C9orf169  | protein_cc chr9  | 1.4E+08  | 1.4E+08  | + | 1297  | 10.49403 | 0.019093 | -0.41719 | 0.155299 | -2.68639 | 0.008472 | 0.036988 | 1 |
| ENSG0000 response | Inflamed | ITGB7     | protein_cc chr12 | 53585102 | 53601091 | - | 4481  | 1965.119 | 0        | -0.36911 | 0.137402 | -2.68637 | 0.008472 | 0.036988 | 1 |
| ENSG0000 response | Inflamed | LINC00507 | lincRNA chr12    | 1.28E+08 | 1.28E+08 | + | 2167  | 4.840095 | 0.52506  | 0.471577 | 0.175555 | 2.686203 | 0.008476 | 0.036999 | 1 |
| ENSG0000 response | Inflamed | CD226     | protein_cc chr18 | 67498394 | 67629039 | - | 3957  | 67.04057 | 0.01432  | -0.65187 | 0.242696 | -2.68594 | 0.008483 | 0.03702  | 1 |
| ENSG0000 response | Inflamed | CTSF      | protein_cc chr11 | 66330934 | 66336312 | - | 2896  | 747.7327 | 0        | -0.41628 | 0.155019 | -2.68536 | 0.008496 | 0.037073 | 1 |
| ENSG0000 response | Inflamed | OSBPL3    | protein_cc chr7  | 24836158 | 25021253 | - | 8100  | 1246.477 | 0        | -0.49783 | 0.185406 | -2.6851  | 0.008502 | 0.037094 | 1 |
| ENSG0000 response | Inflamed | GRAPL     | protein_cc chr17 | 19030782 | 19062489 | + | 2028  | 2.052506 | 0.553699 | -0.37199 | 0.13855  | -2.68487 | 0.008508 | 0.037104 | 1 |
| ENSG0000 response | Inflamed | OSBPL7    | protein_cc chr17 | 45884738 | 45899200 | - | 6572  | 2364.587 | 0        | 0.372268 | 0.138654 | 2.68486  | 0.008508 | 0.037104 | 1 |
| ENSG0000 response | Inflamed | KCNN1     | protein_cc chr19 | 18062102 | 18110889 | + | 3972  | 12.74463 | 0.045346 | -0.42351 | 0.157743 | -2.68482 | 0.008509 | 0.037104 | 1 |
| ENSG0000 response | Inflamed | BX255923  | lincRNA chr9     | 69174213 | 69179458 | - | 2874  | 4.937947 | 0.479714 | -0.57934 | 0.215799 | -2.68465 | 0.008513 | 0.037111 | 1 |
| ENSG0000 response | Inflamed | CACNA1F   | protein_cc chrX  | 49061523 | 49089833 | - | 6928  | 42.36516 | 0.002387 | 0.518985 | 0.193316 | 2.684643 | 0.008513 | 0.037111 | 1 |
| ENSG0000 response | Inflamed | MYO7A     | protein_cc chr11 | 76839310 | 76926284 | + | 10136 | 480.8329 | 0        | -0.32571 | 0.12133  | -2.68448 | 0.008517 | 0.037121 | 1 |
| ENSG0000 response | Inflamed | MS4A10    | protein_cc chr11 | 60552821 | 60568778 | + | 2296  | 102.9403 | 0.389021 | 0.873669 | 0.325534 | 2.683805 | 0.008533 | 0.037185 | 1 |



|                   |          |           |                  |          |          |   |       |          |          |          |          |          |          |          |   |
|-------------------|----------|-----------|------------------|----------|----------|---|-------|----------|----------|----------|----------|----------|----------|----------|---|
| ENSG0000 response | Inflamed | SLC26A11  | protein_cc chr17 | 78193498 | 78227299 | + | 4903  | 531.7709 | 0        | -0.33168 | 0.123592 | -2.68363 | 0.008537 | 0.037192 | 1 |
| ENSG0000 response | Inflamed | AMOTL1    | protein_cc chr11 | 94439597 | 94609918 | + | 10035 | 1333.208 | 0        | -0.5435  | 0.202526 | -2.68362 | 0.008538 | 0.037192 | 1 |
| ENSG0000 response | Inflamed | C2orf81   | protein_cc chr2  | 74641304 | 74648718 | - | 2994  | 119.2267 | 0        | -0.26471 | 0.09866  | -2.68307 | 0.008551 | 0.037243 | 1 |
| ENSG0000 response | Inflamed | ABCA13    | protein_cc chr7  | 48211055 | 48687092 | + | 18580 | 79.58711 | 0.016706 | -0.72886 | 0.271667 | -2.68291 | 0.008554 | 0.037253 | 1 |
| ENSG0000 response | Inflamed | RBMS1P1   | pseudoger chr12  | 66627859 | 66629014 | - | 1156  | 2.27685  | 0.455847 | -0.35862 | 0.133683 | -2.6826  | 0.008562 | 0.037279 | 1 |
| ENSG0000 response | Inflamed | CXCR6     | protein_cc chr3  | 45982425 | 45989845 | + | 3769  | 257.6396 | 0        | -0.44875 | 0.167297 | -2.68238 | 0.008567 | 0.037295 | 1 |
| ENSG0000 response | Inflamed | DIMT1     | protein_cc chr5  | 61683081 | 61699766 | - | 3736  | 385.0764 | 0        | -0.28709 | 0.107038 | -2.68216 | 0.008572 | 0.037312 | 1 |
| ENSG0000 response | Inflamed | ZFP36L2   | protein_cc chr2  | 43449541 | 43453748 | - | 3696  | 14018.37 | 0        | 0.352098 | 0.131281 | 2.682008 | 0.008576 | 0.037322 | 1 |
| ENSG0000 response | Inflamed | ABO       | processed_chr9   | 1.36E+08 | 1.36E+08 | - | 6341  | 1057.303 | 0.002387 | 0.737451 | 0.274982 | 2.681817 | 0.00858  | 0.037332 | 1 |
| ENSG0000 response | Inflamed | HCN4      | protein_cc chr15 | 73612200 | 73661605 | - | 7228  | 10.05251 | 0.109785 | 0.62122  | 0.231643 | 2.681796 | 0.008581 | 0.037332 | 1 |
| ENSG0000 response | Inflamed | RP11-316M | lincRNA chr17    | 75718954 | 75724641 | - | 2281  | 0.825776 | 0.797136 | -0.26346 | 0.098252 | -2.68147 | 0.008589 | 0.037359 | 1 |
| ENSG0000 response | Inflamed | TTC22     | protein_cc chr1  | 55245385 | 55266940 | - | 6055  | 4109.263 | 0        | 0.516438 | 0.192601 | 2.681393 | 0.008591 | 0.037361 | 1 |
| ENSG0000 response | Inflamed | VCAM1     | protein_cc chr1  | 1.01E+08 | 1.01E+08 | + | 6049  | 1401.26  | 0        | -0.73371 | 0.273674 | -2.68095 | 0.008601 | 0.037401 | 1 |
| ENSG0000 response | Inflamed | FBLN5     | protein_cc chr14 | 92335756 | 92414331 | - | 4973  | 1233.675 | 0        | -0.53141 | 0.198263 | -2.68034 | 0.008616 | 0.037458 | 1 |
| ENSG0000 response | Inflamed | VWCE      | protein_cc chr11 | 61025762 | 61062896 | - | 4869  | 21.24582 | 0.033413 | -0.52652 | 0.196465 | -2.67994 | 0.008625 | 0.037493 | 1 |
| ENSG0000 response | Inflamed | AL020996  | protein_cc chr1  | 26145212 | 26147288 | - | 2077  | 22.30788 | 0.016706 | 0.341684 | 0.127506 | 2.679749 | 0.00863  | 0.037507 | 1 |
| ENSG0000 response | Inflamed | LFNG      | protein_cc chr7  | 2552163  | 2568811  | + | 3372  | 2519.126 | 0        | 0.285663 | 0.106612 | 2.679459 | 0.008637 | 0.037532 | 1 |
| ENSG0000 response | Inflamed | ZBTB17    | protein_cc chr1  | 16268364 | 16302627 | - | 4240  | 1057.337 | 0        | -0.21918 | 0.081801 | -2.67939 | 0.008639 | 0.037533 | 1 |
| ENSG0000 response | Inflamed | SLC35F6   | protein_cc chr2  | 26987152 | 27004099 | + | 3902  | 2279.37  | 0        | -0.21534 | 0.080375 | -2.67916 | 0.008644 | 0.037551 | 1 |
| ENSG0000 response | Inflamed | SNCB      | protein_cc chr5  | 1.76E+08 | 1.76E+08 | - | 1979  | 1.522673 | 0.634845 | -0.37456 | 0.139826 | -2.67874 | 0.008654 | 0.037588 | 1 |
| ENSG0000 response | Inflamed | DDX39A    | protein_cc chr19 | 14519631 | 14530192 | - | 3837  | 2061.847 | 0        | -0.18463 | 0.068926 | -2.67865 | 0.008656 | 0.037591 | 1 |
| ENSG0000 response | Inflamed | PPM1K     | protein_cc chr4  | 89178772 | 89205921 | - | 11371 | 681.1122 | 0        | -0.55899 | 0.208708 | -2.67832 | 0.008664 | 0.03762  | 1 |
| ENSG0000 response | Inflamed | RP3-325F2 | antisense chr6   | 1.37E+08 | 1.37E+08 | + | 505   | 1.054893 | 0.756563 | -0.35074 | 0.130972 | -2.67797 | 0.008673 | 0.037649 | 1 |
| ENSG0000 response | Inflamed | FAM171A2  | protein_cc chr17 | 42430583 | 42441243 | - | 3592  | 40.37709 | 0.011933 | -0.55385 | 0.206822 | -2.67792 | 0.008674 | 0.037649 | 1 |
| ENSG0000 response | Inflamed | FUT3      | protein_cc chr19 | 5842899  | 5851485  | - | 3109  | 8751.045 | 0        | 0.555658 | 0.207515 | 2.677673 | 0.00868  | 0.037669 | 1 |
| ENSG0000 response | Inflamed | RP4-758J2 | lincRNA chr1     | 54492356 | 54494172 | - | 1817  | 107.6754 | 0        | 0.473566 | 0.176869 | 2.677486 | 0.008684 | 0.037682 | 1 |
| ENSG0000 response | Inflamed | TNFSF12   | protein_cc chr17 | 7452208  | 7464925  | + | 3149  | 607.9332 | 0        | -0.34237 | 0.127882 | -2.67725 | 0.00869  | 0.037701 | 1 |
| ENSG0000 response | Inflamed | RP11-764k | lincRNA chr9     | 68397878 | 68409893 | - | 2878  | 2.305489 | 0.494033 | -0.40122 | 0.149867 | -2.67717 | 0.008692 | 0.037702 | 1 |
| ENSG0000 response | Inflamed | NXPE2P1   | pseudoger chr11  | 1.14E+08 | 1.14E+08 | - | 726   | 1.00716  | 0.78043  | 0.314399 | 0.117443 | 2.677034 | 0.008695 | 0.037711 | 1 |
| ENSG0000 response | Inflamed | PLD6      | protein_cc chr17 | 17104309 | 17109629 | - | 2560  | 93.68019 | 0.002387 | -0.29679 | 0.110877 | -2.67675 | 0.008702 | 0.037734 | 1 |
| ENSG0000 response | Inflamed | CALR      | protein_cc chr19 | 13049392 | 13055303 | + | 2714  | 35812.37 | 0        | -0.22445 | 0.083863 | -2.67638 | 0.008711 | 0.037767 | 1 |
| ENSG0000 response | Inflamed | RP13-46H2 | antisense chr11  | 528907   | 529659   | + | 547   | 3.849642 | 0.236277 | -0.35019 | 0.130848 | -2.67628 | 0.008714 | 0.037771 | 1 |
| ENSG0000 response | Inflamed | LGALS9C   | protein_cc chr17 | 18380051 | 18398259 | + | 4754  | 858.7422 | 0        | 0.71503  | 0.267234 | 2.675673 | 0.008728 | 0.037829 | 1 |
| ENSG0000 response | Inflamed | CTD-2171f | lincRNA chr18    | 52773135 | 52791537 | - | 3170  | 2.171838 | 0.579952 | -0.45565 | 0.170299 | -2.67561 | 0.00873  | 0.037829 | 1 |
| ENSG0000 response | Inflamed | KALRN     | protein_cc chr3  | 1.24E+08 | 1.24E+08 | + | 24490 | 2077.864 | 0        | 0.359765 | 0.134476 | 2.6753   | 0.008737 | 0.037855 | 1 |
| ENSG0000 response | Inflamed | NFIL3     | protein_cc chr9  | 94171327 | 94186144 | - | 2085  | 866.5847 | 0        | -0.39002 | 0.145791 | -2.67518 | 0.00874  | 0.037862 | 1 |
| ENSG0000 response | Inflamed | GGCX      | protein_cc chr2  | 85771846 | 85788670 | - | 9098  | 1670.959 | 0        | -0.18237 | 0.068177 | -2.67493 | 0.008746 | 0.037878 | 1 |
| ENSG0000 response | Inflamed | LITAF     | protein_cc chr16 | 11641853 | 11730237 | - | 4784  | 13958.77 | 0        | -0.28752 | 0.107486 | -2.6749  | 0.008747 | 0.037878 | 1 |
| ENSG0000 response | Inflamed | PSMA8     | protein_cc chr18 | 23713816 | 23773319 | + | 1894  | 4.078759 | 0.372315 | -0.49156 | 0.183816 | -2.67421 | 0.008764 | 0.03794  | 1 |
| ENSG0000 response | Inflamed | ADAMTS6   | protein_cc chr5  | 64444563 | 64777747 | - | 8567  | 64.40811 | 0.031026 | -0.73871 | 0.276235 | -2.6742  | 0.008764 | 0.03794  | 1 |

|                   |          |           |                  |          |          |   |       |          |          |          |          |          |          |          |   |
|-------------------|----------|-----------|------------------|----------|----------|---|-------|----------|----------|----------|----------|----------|----------|----------|---|
| ENSG0000 response | Inflamed | GMNN      | protein_cc chr6  | 24775159 | 24786327 | + | 2476  | 612.3484 | 0        | 0.350143 | 0.130997 | 2.672919 | 0.008795 | 0.038069 | 1 |
| ENSG0000 response | Inflamed | TMEM45B   | protein_cc chr11 | 1.3E+08  | 1.3E+08  | + | 3027  | 7638.931 | 0        | 0.539784 | 0.201971 | 2.672584 | 0.008804 | 0.038098 | 1 |
| ENSG0000 response | Inflamed | GPR162    | protein_cc chr12 | 6930711  | 6939136  | + | 3295  | 195.8592 | 0        | -0.36234 | 0.135584 | -2.67245 | 0.008807 | 0.038103 | 1 |
| ENSG0000 response | Inflamed | KIAA1671  | protein_cc chr22 | 25348697 | 25593415 | + | 15818 | 7406.427 | 0        | 0.471177 | 0.176311 | 2.672421 | 0.008808 | 0.038103 | 1 |
| ENSG0000 response | Inflamed | HPCAL1    | protein_cc chr2  | 10443015 | 10567743 | + | 5675  | 3319.831 | 0        | 0.214561 | 0.080294 | 2.672179 | 0.008813 | 0.038122 | 1 |
| ENSG0000 response | Inflamed | RPL5P9    | pseudoger chr2   | 1.12E+08 | 1.12E+08 | + | 886   | 0.887828 | 0.792363 | 0.253789 | 0.094977 | 2.672093 | 0.008816 | 0.038125 | 1 |
| ENSG0000 response | Inflamed | TMEM185   | protein_cc chr2  | 1.21E+08 | 1.21E+08 | - | 2131  | 744.42   | 0        | -0.24012 | 0.089868 | -2.67195 | 0.008819 | 0.038134 | 1 |
| ENSG0000 response | Inflamed | KIF16B    | protein_cc chr20 | 16252749 | 16554078 | - | 6278  | 1781.702 | 0        | 0.489521 | 0.183224 | 2.67171  | 0.008825 | 0.038153 | 1 |
| ENSG0000 response | Inflamed | HHLA2     | protein_cc chr3  | 1.08E+08 | 1.08E+08 | + | 3588  | 4388.332 | 0        | 0.78913  | 0.295459 | 2.670857 | 0.008846 | 0.038237 | 1 |
| ENSG0000 response | Inflamed | FANK1     | protein_cc chr10 | 1.28E+08 | 1.28E+08 | + | 4178  | 101.4749 | 0        | 0.404621 | 0.151502 | 2.670725 | 0.008849 | 0.038245 | 1 |
| ENSG0000 response | Inflamed | RP11-222k | lincRNA chr3     | 27754401 | 27755496 | + | 1096  | 9.47494  | 0.090692 | -0.49133 | 0.183996 | -2.67035 | 0.008858 | 0.038278 | 1 |
| ENSG0000 response | Inflamed | LOH12CR1  | protein_cc chr12 | 12510013 | 12619840 | + | 2192  | 242.599  | 0        | -0.12837 | 0.048075 | -2.67024 | 0.008861 | 0.038284 | 1 |
| ENSG0000 response | Inflamed | SH3GL2    | protein_cc chr9  | 17579080 | 17797127 | + | 2869  | 10.29833 | 0.178998 | 0.498941 | 0.186875 | 2.669925 | 0.008869 | 0.038311 | 1 |
| ENSG0000 response | Inflamed | CTBP2     | protein_cc chr10 | 1.27E+08 | 1.27E+08 | - | 7411  | 3834.589 | 0        | 0.258782 | 0.096927 | 2.669855 | 0.00887  | 0.038312 | 1 |
| ENSG0000 response | Inflamed | KIAA2013  | protein_cc chr1  | 11979648 | 11986485 | - | 3281  | 5258.489 | 0        | 0.194058 | 0.072703 | 2.669195 | 0.008887 | 0.038375 | 1 |
| ENSG0000 response | Inflamed | RPL5P4    | pseudoger chr1   | 35816323 | 35817208 | + | 886   | 6.138425 | 0.088305 | 0.401856 | 0.150556 | 2.669146 | 0.008888 | 0.038375 | 1 |
| ENSG0000 response | Inflamed | INA       | protein_cc chr10 | 1.05E+08 | 1.05E+08 | + | 3231  | 16.68735 | 0.059666 | -0.62876 | 0.235588 | -2.66891 | 0.008894 | 0.038394 | 1 |
| ENSG0000 response | Inflamed | TCEAL7    | protein_cc chrX  | 1.03E+08 | 1.03E+08 | + | 1177  | 47.07876 | 0        | -0.46398 | 0.173856 | -2.66878 | 0.008897 | 0.038401 | 1 |
| ENSG0000 response | Inflamed | RBP7      | protein_cc chr1  | 10057264 | 10076078 | + | 861   | 50.90692 | 0        | -0.38749 | 0.145209 | -2.6685  | 0.008904 | 0.038425 | 1 |
| ENSG0000 response | Inflamed | NUAK2     | protein_cc chr1  | 2.05E+08 | 2.05E+08 | - | 3405  | 1849.155 | 0        | 0.349554 | 0.130996 | 2.668438 | 0.008905 | 0.038425 | 1 |
| ENSG0000 response | Inflamed | RP11-160C | lincRNA chr17    | 63096930 | 63107176 | + | 664   | 83.58234 | 0        | 0.395763 | 0.148329 | 2.668141 | 0.008913 | 0.03845  | 1 |
| ENSG0000 response | Inflamed | SLC26A4-A | antisense chr7   | 1.07E+08 | 1.07E+08 | - | 4638  | 12.23628 | 0.324582 | -0.75164 | 0.281716 | -2.66808 | 0.008914 | 0.038451 | 1 |
| ENSG0000 response | Inflamed | RP11-244F | antisense chr15  | 63338233 | 63341586 | - | 3354  | 318.5251 | 0.004773 | 0.685601 | 0.256973 | 2.667991 | 0.008916 | 0.038454 | 1 |
| ENSG0000 response | Inflamed | HMGA2     | protein_cc chr12 | 66217911 | 66360075 | + | 14808 | 169.9642 | 0.002387 | 0.539986 | 0.202466 | 2.667043 | 0.00894  | 0.038548 | 1 |
| ENSG0000 response | Inflamed | FBXW7     | protein_cc chr4  | 1.53E+08 | 1.53E+08 | - | 10288 | 1071.659 | 0        | -0.46387 | 0.173931 | -2.66696 | 0.008942 | 0.038551 | 1 |
| ENSG0000 response | Inflamed | MAG       | protein_cc chr19 | 35783028 | 35804707 | + | 2957  | 6.121718 | 0.491647 | -0.44251 | 0.165957 | -2.66641 | 0.008956 | 0.038603 | 1 |
| ENSG0000 response | Inflamed | LINC00243 | processed_chr6   | 30766431 | 30798436 | - | 2171  | 8.959427 | 0.150358 | -0.51596 | 0.193553 | -2.66572 | 0.008973 | 0.038671 | 1 |
| ENSG0000 response | Inflamed | HNRNPA1f  | pseudoger chr9   | 91025444 | 91026378 | - | 935   | 1.448687 | 0.606205 | -0.27711 | 0.103957 | -2.66564 | 0.008975 | 0.038673 | 1 |
| ENSG0000 response | Inflamed | INF2      | protein_cc chr14 | 1.05E+08 | 1.05E+08 | + | 6497  | 11598.51 | 0        | 0.29537  | 0.110815 | 2.665419 | 0.00898  | 0.038691 | 1 |
| ENSG0000 response | Inflamed | MIR3145   | miRNA chr6       | 1.39E+08 | 1.39E+08 | - | 82    | 1.391408 | 0.649165 | 0.29348  | 0.110172 | 2.663841 | 0.00902  | 0.038854 | 1 |
| ENSG0000 response | Inflamed | C11orf49  | protein_cc chr11 | 46958240 | 47185936 | + | 5671  | 993.3126 | 0        | 0.205956 | 0.07732  | 2.663676 | 0.009024 | 0.038863 | 1 |
| ENSG0000 response | Inflamed | RP11-498F | lincRNA chr9     | 99962757 | 1E+08    | - | 806   | 3.477327 | 0.334129 | -0.38883 | 0.145975 | -2.66364 | 0.009025 | 0.038863 | 1 |
| ENSG0000 response | Inflamed | IGLV8-61  | IG_V_gene chr22  | 22453110 | 22453622 | + | 414   | 2969.332 | 0        | -0.87059 | 0.326856 | -2.66353 | 0.009027 | 0.038868 | 1 |
| ENSG0000 response | Inflamed | CTB-118Nf | lincRNA chr5     | 1.16E+08 | 1.16E+08 | + | 482   | 5.663484 | 0.152745 | 0.394916 | 0.148281 | 2.663291 | 0.009033 | 0.038888 | 1 |
| ENSG0000 response | Inflamed | NR1H3     | protein_cc chr11 | 47269851 | 47290396 | + | 4346  | 1380.709 | 0        | -0.2414  | 0.090642 | -2.66319 | 0.009036 | 0.038892 | 1 |
| ENSG0000 response | Inflamed | MFSD9     | protein_cc chr2  | 1.03E+08 | 1.03E+08 | - | 4367  | 1212.535 | 0        | 0.29409  | 0.110434 | 2.66304  | 0.00904  | 0.038902 | 1 |
| ENSG0000 response | Inflamed | DNAJC18   | protein_cc chr5  | 1.39E+08 | 1.39E+08 | - | 6497  | 198.5967 | 0        | -0.4014  | 0.150749 | -2.66273 | 0.009047 | 0.038925 | 1 |
| ENSG0000 response | Inflamed | C1QTNF1-1 | protein_cc chr17 | 77015291 | 77023737 | - | 966   | 7.563246 | 0.307876 | 0.557023 | 0.209195 | 2.662703 | 0.009048 | 0.038925 | 1 |
| ENSG0000 response | Inflamed | CCDC74A   | protein_cc chr2  | 1.32E+08 | 1.32E+08 | + | 4261  | 110.358  | 0        | -0.35826 | 0.13457  | -2.66227 | 0.009059 | 0.038966 | 1 |
| ENSG0000 response | Inflamed | C20orf144 | protein_cc chr20 | 32250090 | 32253425 | + | 2442  | 3.976134 | 0.205251 | -0.36382 | 0.136663 | -2.6622  | 0.009061 | 0.038967 | 1 |

|                   |          |           |                    |          |          |   |       |          |          |          |          |          |          |          |   |
|-------------------|----------|-----------|--------------------|----------|----------|---|-------|----------|----------|----------|----------|----------|----------|----------|---|
| ENSG0000 response | Inflamed | MYRIP     | protein_cc chr3    | 39850405 | 40301812 | + | 5872  | 362.9403 | 0        | 0.434766 | 0.163416 | 2.660485 | 0.009104 | 0.039146 | 1 |
| ENSG0000 response | Inflamed | BRCA2     | protein_cc chr13   | 32889611 | 32973805 | + | 11269 | 124.9642 | 0.00716  | -0.58288 | 0.219137 | -2.65989 | 0.009119 | 0.039204 | 1 |
| ENSG0000 response | Inflamed | FAIM2     | protein_cc chr12   | 50260679 | 50298000 | - | 6057  | 305.8807 | 0.004773 | -0.60843 | 0.228748 | -2.65982 | 0.009121 | 0.039205 | 1 |
| ENSG0000 response | Inflamed | RP3-469D1 | pseudoger chr1     | 25725203 | 25725771 | + | 569   | 7.281623 | 0.069212 | 0.329695 | 0.123974 | 2.65939  | 0.009131 | 0.039239 | 1 |
| ENSG0000 response | Inflamed | KLHL30    | protein_cc chr2    | 2.39E+08 | 2.39E+08 | + | 3726  | 26.44153 | 0.016706 | -0.50194 | 0.188742 | -2.65939 | 0.009131 | 0.039239 | 1 |
| ENSG0000 response | Inflamed | GBP1      | protein_cc chr1    | 89518002 | 89531043 | - | 4992  | 2298.22  | 0        | -0.65042 | 0.244633 | -2.65874 | 0.009148 | 0.0393   | 1 |
| ENSG0000 response | Inflamed | TRBV4-1   | TR_V_gene chr7     | 1.42E+08 | 1.42E+08 | + | 373   | 14.34845 | 0.105012 | -0.53198 | 0.200095 | -2.65866 | 0.00915  | 0.0393   | 1 |
| ENSG0000 response | Inflamed | SPCS3     | protein_cc chr4    | 1.77E+08 | 1.77E+08 | + | 6831  | 3680.32  | 0        | -0.42249 | 0.15891  | -2.65865 | 0.00915  | 0.0393   | 1 |
| ENSG0000 response | Inflamed | IGLV3-6   | IG_V_pseud chr22   | 23192550 | 23192799 | + | 250   | 6.042959 | 0.274463 | -0.60406 | 0.22722  | -2.6585  | 0.009154 | 0.03931  | 1 |
| ENSG0000 response | Inflamed | NFS1      | protein_cc chr20   | 34255977 | 34287281 | - | 6024  | 705.1384 | 0        | 0.178434 | 0.067132 | 2.657941 | 0.009168 | 0.039361 | 1 |
| ENSG0000 response | Inflamed | Z95704.5  | pseudoger chr4     | 123966   | 125423   | - | 1452  | 3.494033 | 0.298329 | 0.371665 | 0.139835 | 2.657884 | 0.00917  | 0.039361 | 1 |
| ENSG0000 response | Inflamed | RP11-1166 | pseudoger chr16    | 31987124 | 32015049 | + | 2227  | 8.472554 | 0.133652 | -0.49679 | 0.186914 | -2.65786 | 0.00917  | 0.039361 | 1 |
| ENSG0000 response | Inflamed | SERPINC1  | protein_cc chr1    | 1.74E+08 | 1.74E+08 | - | 1763  | 3.634845 | 0.264916 | -0.34452 | 0.12963  | -2.65769 | 0.009174 | 0.039373 | 1 |
| ENSG0000 response | Inflamed | ALDH3B2   | protein_cc chr11   | 67429633 | 67448671 | - | 3235  | 28.04296 | 0.033413 | -0.69026 | 0.259777 | -2.65712 | 0.009189 | 0.039428 | 1 |
| ENSG0000 response | Inflamed | KB-1836B5 | sense_ov chr8      | 37920399 | 37921309 | + | 911   | 5.840095 | 0.126492 | 0.375591 | 0.141359 | 2.656998 | 0.009192 | 0.039435 | 1 |
| ENSG0000 response | Inflamed | FMN1      | protein_cc chr15   | 33057747 | 33486897 | - | 20046 | 1263.453 | 0        | 0.468483 | 0.176339 | 2.656715 | 0.009199 | 0.03946  | 1 |
| ENSG0000 response | Inflamed | TM9SF1    | protein_cc chr14   | 24658349 | 24682679 | - | 4180  | 319.8902 | 0        | -0.20001 | 0.075288 | -2.65664 | 0.009201 | 0.039462 | 1 |
| ENSG0000 response | Inflamed | FAM157C   | processed_ch chr16 | 90168679 | 90244752 | + | 4524  | 104.4558 | 0.054893 | -0.82107 | 0.309101 | -2.65631 | 0.00921  | 0.039491 | 1 |
| ENSG0000 response | Inflamed | MEP1B     | protein_cc chr18   | 29765032 | 29800367 | + | 2583  | 346.1814 | 0.026253 | 1.107715 | 0.417029 | 2.656206 | 0.009212 | 0.039496 | 1 |
| ENSG0000 response | Inflamed | AHR       | protein_cc chr7    | 17338246 | 17385776 | + | 6661  | 3072.091 | 0        | -0.46244 | 0.174118 | -2.65591 | 0.00922  | 0.039522 | 1 |
| ENSG0000 response | Inflamed | EPHA4     | protein_cc chr2    | 2.22E+08 | 2.22E+08 | - | 7554  | 451.9523 | 0.002387 | 0.4958   | 0.186684 | 2.655825 | 0.009222 | 0.039524 | 1 |
| ENSG0000 response | Inflamed | CLDN10    | protein_cc chr13   | 96085858 | 96232013 | + | 3380  | 3.174224 | 0.563246 | -0.547   | 0.205972 | -2.65571 | 0.009225 | 0.039531 | 1 |
| ENSG0000 response | Inflamed | ESD       | protein_cc chr13   | 47345391 | 47371367 | - | 3401  | 1794.444 | 0        | 0.259319 | 0.097656 | 2.655427 | 0.009232 | 0.039555 | 1 |
| ENSG0000 response | Inflamed | MAD2L1B1  | protein_cc chr6    | 43597277 | 43608689 | + | 1880  | 894.5919 | 0        | 0.197743 | 0.074469 | 2.655357 | 0.009234 | 0.039556 | 1 |
| ENSG0000 response | Inflamed | TNFRSF121 | protein_cc chr16   | 3068446  | 3072384  | + | 1848  | 781.0406 | 0        | -0.59722 | 0.224922 | -2.65522 | 0.009237 | 0.039564 | 1 |
| ENSG0000 response | Inflamed | CCL14     | protein_cc chr17   | 34310327 | 34329100 | - | 4226  | 169.9021 | 0        | 0.350492 | 0.132012 | 2.654995 | 0.009243 | 0.039583 | 1 |
| ENSG0000 response | Inflamed | SPARCL1   | protein_cc chr4    | 88394487 | 88452213 | - | 3477  | 3073.322 | 0        | -0.656   | 0.247123 | -2.65455 | 0.009254 | 0.039625 | 1 |
| ENSG0000 response | Inflamed | LINC00968 | lincRNA chr8       | 57408805 | 57472382 | - | 2840  | 2.692124 | 0.522673 | -0.4987  | 0.187881 | -2.65434 | 0.00926  | 0.039641 | 1 |
| ENSG0000 response | Inflamed | RD3       | protein_cc chr1    | 2.12E+08 | 2.12E+08 | - | 4266  | 6.494033 | 0.188544 | -0.47989 | 0.180833 | -2.65375 | 0.009275 | 0.0397   | 1 |
| ENSG0000 response | Inflamed | TMEM74    | protein_cc chr8    | 1.1E+08  | 1.1E+08  | - | 2877  | 5.229117 | 0.183771 | -0.48466 | 0.182644 | -2.65357 | 0.00928  | 0.039713 | 1 |
| ENSG0000 response | Inflamed | FUK       | protein_cc chr16   | 70488324 | 70514177 | + | 7405  | 1834.473 | 0        | 0.26014  | 0.098039 | 2.653429 | 0.009283 | 0.039722 | 1 |
| ENSG0000 response | Inflamed | WWTR1     | protein_cc chr3    | 1.49E+08 | 1.49E+08 | - | 8413  | 1065.516 | 0        | -0.4546  | 0.171378 | -2.65264 | 0.009303 | 0.039802 | 1 |
| ENSG0000 response | Inflamed | RP4-657E1 | pseudoger chr1     | 19623574 | 19624397 | + | 525   | 10.50119 | 0.162291 | 0.53326  | 0.201039 | 2.652516 | 0.009307 | 0.03981  | 1 |
| ENSG0000 response | Inflamed | RP11-336A | lincRNA chr10      | 5658825  | 5660124  | - | 657   | 0.97136  | 0.782816 | 0.280614 | 0.105803 | 2.652242 | 0.009314 | 0.039829 | 1 |
| ENSG0000 response | Inflamed | EOGT      | protein_cc chr3    | 69024365 | 69063112 | - | 5647  | 494.21   | 0        | -0.46028 | 0.173543 | -2.65222 | 0.009314 | 0.039829 | 1 |
| ENSG0000 response | Inflamed | RP11-61L2 | pseudoger chr7     | 1.43E+08 | 1.44E+08 | - | 5892  | 29.12172 | 0.009547 | -0.36486 | 0.137573 | -2.65215 | 0.009316 | 0.039831 | 1 |
| ENSG0000 response | Inflamed | SPDYA     | protein_cc chr2    | 29005383 | 29073477 | + | 3483  | 10.61337 | 0.100239 | 0.530163 | 0.199926 | 2.651802 | 0.009325 | 0.039862 | 1 |
| ENSG0000 response | Inflamed | RP11-64C1 | pseudoger chr18    | 12201981 | 12223538 | + | 2209  | 3.159905 | 0.443914 | 0.37533  | 0.141561 | 2.651377 | 0.009336 | 0.039902 | 1 |
| ENSG0000 response | Inflamed | PCDH1     | protein_cc chr5    | 1.41E+08 | 1.41E+08 | - | 5641  | 8592.284 | 0        | 0.36751  | 0.138643 | 2.650759 | 0.009352 | 0.039964 | 1 |
| ENSG0000 response | Inflamed | RAB11FIP4 | protein_cc chr17   | 29718642 | 29865236 | + | 15384 | 3499.936 | 0        | 0.266718 | 0.100627 | 2.650562 | 0.009357 | 0.039979 | 1 |

|                   |          |           |                  |          |          |   |       |          |          |          |          |          |          |          |   |
|-------------------|----------|-----------|------------------|----------|----------|---|-------|----------|----------|----------|----------|----------|----------|----------|---|
| ENSG0000 response | Inflamed | GATSL3    | protein_cc chr22 | 30681106 | 30685616 | - | 2746  | 41.71838 | 0        | -0.30629 | 0.115568 | -2.65031 | 0.009363 | 0.040001 | 1 |
| ENSG0000 response | Inflamed | GYPE      | protein_cc chr4  | 1.45E+08 | 1.45E+08 | - | 2004  | 14.93556 | 0.040573 | -0.46123 | 0.174046 | -2.65006 | 0.00937  | 0.040022 | 1 |
| ENSG0000 response | Inflamed | ACOT7     | protein_cc chr1  | 6324329  | 6454451  | - | 4892  | 2227.251 | 0        | 0.194025 | 0.073222 | 2.64981  | 0.009376 | 0.040043 | 1 |
| ENSG0000 response | Inflamed | RP11-176M | lincRNA chr18    | 75133575 | 75272719 | + | 562   | 1.128878 | 0.720764 | 0.308951 | 0.116613 | 2.649383 | 0.009387 | 0.040083 | 1 |
| ENSG0000 response | Inflamed | HSPG2     | protein_cc chr1  | 22148738 | 22263790 | - | 17694 | 16031.08 | 0        | -0.48565 | 0.183312 | -2.64933 | 0.009389 | 0.040083 | 1 |
| ENSG0000 response | Inflamed | DUSP26    | protein_cc chr8  | 33448856 | 33457624 | - | 2046  | 35.01671 | 0.004773 | -0.4455  | 0.168171 | -2.64906 | 0.009396 | 0.040106 | 1 |
| ENSG0000 response | Inflamed | RP3-412A5 | antisense chr22  | 31478142 | 31479551 | - | 1410  | 14.88067 | 0.019093 | -0.32063 | 0.121048 | -2.6488  | 0.009403 | 0.040129 | 1 |
| ENSG0000 response | Inflamed | SNX12     | protein_cc chrX  | 70279094 | 70288273 | - | 2378  | 2111.647 | 0        | 0.188134 | 0.071029 | 2.648689 | 0.009405 | 0.040131 | 1 |
| ENSG0000 response | Inflamed | SLC27A2   | protein_cc chr15 | 50474393 | 50528592 | + | 2802  | 1388.85  | 0        | 0.436956 | 0.164972 | 2.648663 | 0.009406 | 0.040131 | 1 |
| ENSG0000 response | Inflamed | KCNMA1    | protein_cc chr10 | 78629359 | 79398353 | - | 18808 | 1517.184 | 0        | 0.399669 | 0.150913 | 2.648345 | 0.009414 | 0.040159 | 1 |
| ENSG0000 response | Inflamed | TRIM71    | protein_cc chr3  | 32859510 | 32939318 | + | 8685  | 1.625298 | 0.603819 | -0.36567 | 0.13808  | -2.64825 | 0.009417 | 0.040164 | 1 |
| ENSG0000 response | Inflamed | TMPRSS2   | protein_cc chr21 | 42836478 | 42903043 | - | 6117  | 21679.53 | 0        | 0.620565 | 0.234388 | 2.647595 | 0.009434 | 0.040225 | 1 |
| ENSG0000 response | Inflamed | CNTLN     | protein_cc chr9  | 17134980 | 17503921 | + | 11167 | 107.9928 | 0        | -0.43951 | 0.166005 | -2.64758 | 0.009434 | 0.040225 | 1 |
| ENSG0000 response | Inflamed | TRIM36    | protein_cc chr5  | 1.14E+08 | 1.15E+08 | - | 6113  | 642.2936 | 0        | 0.624271 | 0.235801 | 2.647454 | 0.009437 | 0.040227 | 1 |
| ENSG0000 response | Inflamed | RP11-11N5 | lincRNA chr8     | 32853696 | 32902373 | + | 765   | 10.08592 | 0.031026 | -0.42631 | 0.161026 | -2.64744 | 0.009438 | 0.040227 | 1 |
| ENSG0000 response | Inflamed | ADAMTSL2  | protein_cc chr9  | 1.36E+08 | 1.36E+08 | + | 4677  | 170.3842 | 0        | -0.55753 | 0.210608 | -2.64726 | 0.009443 | 0.040241 | 1 |
| ENSG0000 response | Inflamed | PLIN5     | protein_cc chr19 | 4522543  | 4535236  | - | 4815  | 60.39379 | 0        | -0.55196 | 0.208534 | -2.64684 | 0.009454 | 0.040281 | 1 |
| ENSG0000 response | Inflamed | HLA-C     | protein_cc chr6  | 31236526 | 31239907 | - | 2507  | 62651.59 | 0        | -0.23928 | 0.090424 | -2.64617 | 0.009471 | 0.040349 | 1 |
| ENSG0000 response | Inflamed | FAM84A    | protein_cc chr2  | 14772810 | 14790933 | + | 8379  | 7512.394 | 0        | 0.482896 | 0.182494 | 2.646092 | 0.009473 | 0.040351 | 1 |
| ENSG0000 response | Inflamed | MC4R      | protein_cc chr18 | 58038564 | 58040001 | - | 1438  | 5.124105 | 0.412888 | -0.61623 | 0.232887 | -2.64603 | 0.009475 | 0.040351 | 1 |
| ENSG0000 response | Inflamed | PLEKHA7   | protein_cc chr11 | 16799842 | 17035990 | - | 9575  | 3392.055 | 0        | 0.462771 | 0.174923 | 2.645576 | 0.009487 | 0.040395 | 1 |
| ENSG0000 response | Inflamed | TMEM132   | protein_cc chr12 | 1.3E+08  | 1.3E+08  | - | 7075  | 13.3222  | 0.095465 | 0.565546 | 0.213791 | 2.645324 | 0.009493 | 0.040415 | 1 |
| ENSG0000 response | Inflamed | AC093585  | antisense chr2   | 2.42E+08 | 2.42E+08 | - | 428   | 0.952267 | 0.768496 | 0.242193 | 0.091556 | 2.645281 | 0.009494 | 0.040415 | 1 |
| ENSG0000 response | Inflamed | RP11-347E | lincRNA chr11    | 1.1E+08  | 1.1E+08  | + | 781   | 1.140811 | 0.768496 | -0.26771 | 0.10122  | -2.64487 | 0.009505 | 0.040455 | 1 |
| ENSG0000 response | Inflamed | OGFRL1    | protein_cc chr6  | 71998506 | 72018653 | + | 9051  | 540.2363 | 0        | -0.4691  | 0.177377 | -2.64463 | 0.009511 | 0.040474 | 1 |
| ENSG0000 response | Inflamed | MLYCD     | protein_cc chr16 | 83932731 | 83949787 | + | 5317  | 716.5943 | 0        | 0.182745 | 0.069104 | 2.644505 | 0.009515 | 0.040482 | 1 |
| ENSG0000 response | Inflamed | RFTN2     | protein_cc chr2  | 1.98E+08 | 1.99E+08 | - | 6007  | 74.90453 | 0.004773 | -0.56829 | 0.214929 | -2.64407 | 0.009526 | 0.040523 | 1 |
| ENSG0000 response | Inflamed | 05-Sep    | protein_cc chr22 | 19701987 | 19712295 | + | 5914  | 247.9475 | 0        | -0.43169 | 0.163272 | -2.644   | 0.009528 | 0.040525 | 1 |
| ENSG0000 response | Inflamed | LMTK2     | protein_cc chr7  | 97736197 | 97838945 | + | 9139  | 4203.153 | 0        | 0.396933 | 0.150131 | 2.643917 | 0.00953  | 0.040528 | 1 |
| ENSG0000 response | Inflamed | ENTHD1    | protein_cc chr22 | 40139049 | 40289868 | - | 3068  | 3.49642  | 0.417661 | -0.40581 | 0.153495 | -2.64381 | 0.009533 | 0.040532 | 1 |
| ENSG0000 response | Inflamed | TMEM238   | protein_cc chr19 | 55890613 | 55895966 | - | 1000  | 516.432  | 0        | 0.394345 | 0.14916  | 2.643763 | 0.009534 | 0.040532 | 1 |
| ENSG0000 response | Inflamed | MVB12B    | protein_cc chr9  | 1.29E+08 | 1.29E+08 | + | 8070  | 1187.482 | 0        | 0.324722 | 0.122831 | 2.643648 | 0.009537 | 0.040538 | 1 |
| ENSG0000 response | Inflamed | RP11-17M  | sense_intr chr17 | 32258151 | 32263225 | - | 535   | 3.551313 | 0.357995 | 0.364377 | 0.137836 | 2.643556 | 0.009539 | 0.040542 | 1 |
| ENSG0000 response | Inflamed | TMEM37    | protein_cc chr2  | 1.2E+08  | 1.2E+08  | + | 2292  | 2158.888 | 0        | 0.570107 | 0.21574  | 2.642561 | 0.009566 | 0.040647 | 1 |
| ENSG0000 response | Inflamed | RP11-10L7 | lincRNA chr4     | 89206094 | 89252573 | + | 1654  | 1.472554 | 0.630072 | -0.33084 | 0.1252   | -2.64246 | 0.009568 | 0.040651 | 1 |
| ENSG0000 response | Inflamed | RP11-712E | pseudoger chr11  | 94876801 | 94878289 | + | 1489  | 1.706444 | 0.599045 | 0.367699 | 0.139171 | 2.642057 | 0.009579 | 0.040684 | 1 |
| ENSG0000 response | Inflamed | CYFIP2    | protein_cc chr5  | 1.57E+08 | 1.57E+08 | + | 10509 | 2052.644 | 0        | -0.35559 | 0.134588 | -2.64205 | 0.009579 | 0.040684 | 1 |
| ENSG0000 response | Inflamed | THRA      | protein_cc chr17 | 38214543 | 38250120 | + | 6959  | 3114.076 | 0        | 0.284471 | 0.107685 | 2.641685 | 0.009589 | 0.040718 | 1 |
| ENSG0000 response | Inflamed | RP3-391O  | pseudoger chr6   | 34544035 | 34544433 | - | 399   | 1.128878 | 0.699284 | -0.2624  | 0.099343 | -2.64134 | 0.009598 | 0.040751 | 1 |
| ENSG0000 response | Inflamed | PTPN14    | protein_cc chr1  | 2.15E+08 | 2.15E+08 | - | 18756 | 578.9284 | 0        | -0.49505 | 0.187451 | -2.64095 | 0.009608 | 0.040787 | 1 |

|                   |          |           |                  |          |            |       |          |          |          |          |          |          |          |   |
|-------------------|----------|-----------|------------------|----------|------------|-------|----------|----------|----------|----------|----------|----------|----------|---|
| ENSG0000 response | Inflamed | C3orf55   | protein_cc chr3  | 1.57E+08 | 1.57E+08 + | 3180  | 16.84964 | 0.057279 | -0.68744 | 0.260307 | -2.6409  | 0.00961  | 0.040787 | 1 |
| ENSG0000 response | Inflamed | MTND1P2:  | pseudoger chr1   | 564442   | 564813 +   | 372   | 1429.979 | 0        | 0.40585  | 0.153754 | 2.639611 | 0.009644 | 0.040925 | 1 |
| ENSG0000 response | Inflamed | KLHL17    | protein_cc chr1  | 895967   | 901095 +   | 3395  | 394.5251 | 0        | -0.35509 | 0.134539 | -2.63934 | 0.009651 | 0.040949 | 1 |
| ENSG0000 response | Inflamed | TSPAN12   | protein_cc chr7  | 1.2E+08  | 1.2E+08 -  | 3366  | 708.7279 | 0        | 0.368256 | 0.139559 | 2.638717 | 0.009667 | 0.041013 | 1 |
| ENSG0000 response | Inflamed | OR1Q1     | protein_cc chr9  | 1.25E+08 | 1.25E+08 + | 1079  | 2.816229 | 0.556086 | -0.45779 | 0.173512 | -2.63837 | 0.009677 | 0.041046 | 1 |
| ENSG0000 response | Inflamed | RP11-700F | lincRNA chr17    | 49012350 | 49022074 - | 2054  | 12.62291 | 0.062053 | 0.449506 | 0.170381 | 2.638242 | 0.00968  | 0.041053 | 1 |
| ENSG0000 response | Inflamed | MPDZ      | protein_cc chr9  | 13105703 | 13279589 - | 11273 | 335.7804 | 0.002387 | -0.54159 | 0.205306 | -2.63798 | 0.009687 | 0.041076 | 1 |
| ENSG0000 response | Inflamed | SOWAHC    | protein_cc chr2  | 1.1E+08  | 1.1E+08 +  | 4653  | 1599.53  | 0        | 0.475355 | 0.180216 | 2.637696 | 0.009695 | 0.041096 | 1 |
| ENSG0000 response | Inflamed | RP11-848F | pseudoger chr17  | 29335515 | 29420145 + | 2147  | 69.26014 | 0        | 0.322889 | 0.122414 | 2.637687 | 0.009695 | 0.041096 | 1 |
| ENSG0000 response | Inflamed | GYS2      | protein_cc chr12 | 21689123 | 21757781 - | 3132  | 1.608592 | 0.603819 | -0.34312 | 0.130093 | -2.63751 | 0.0097   | 0.041109 | 1 |
| ENSG0000 response | Inflamed | AP000230  | lincRNA chr21    | 27543189 | 27589700 + | 2044  | 4.167064 | 0.343675 | 0.353279 | 0.13396  | 2.637203 | 0.009708 | 0.041138 | 1 |
| ENSG0000 response | Inflamed | RHBDL1    | protein_cc chr16 | 725666   | 728268 +   | 1884  | 55.62053 | 0        | 0.346176 | 0.13128  | 2.63694  | 0.009715 | 0.041161 | 1 |
| ENSG0000 response | Inflamed | PARD6B    | protein_cc chr20 | 49348081 | 49373332 + | 4726  | 326.8449 | 0.002387 | 0.559853 | 0.212338 | 2.636616 | 0.009723 | 0.041191 | 1 |
| ENSG0000 response | Inflamed | GPR88     | protein_cc chr1  | 1.01E+08 | 1.01E+08 + | 3491  | 11.67303 | 0.069212 | -0.56644 | 0.214842 | -2.63654 | 0.009725 | 0.041192 | 1 |
| ENSG0000 response | Inflamed | SLC2A9    | protein_cc chr4  | 9772777  | 10056560 - | 6614  | 180.4726 | 0        | -0.21806 | 0.082711 | -2.63645 | 0.009728 | 0.041197 | 1 |
| ENSG0000 response | Inflamed | TACO1     | protein_cc chr17 | 61678231 | 61685725 + | 2315  | 837.8759 | 0        | 0.151955 | 0.057642 | 2.636181 | 0.009735 | 0.04122  | 1 |
| ENSG0000 response | Inflamed | RP11-575C | pseudoger chr12  | 1.01E+08 | 1.01E+08 + | 1454  | 1.735084 | 0.544153 | 0.315757 | 0.119783 | 2.636074 | 0.009738 | 0.041222 | 1 |
| ENSG0000 response | Inflamed | TPTEP1    | lincRNA chr22    | 17082777 | 17179632 + | 12081 | 105.0024 | 0.004773 | -0.41333 | 0.156799 | -2.63605 | 0.009739 | 0.041222 | 1 |
| ENSG0000 response | Inflamed | NCMAP     | protein_cc chr1  | 24882602 | 24935819 + | 4122  | 118.8783 | 0        | -0.45028 | 0.170829 | -2.63585 | 0.009744 | 0.041238 | 1 |
| ENSG0000 response | Inflamed | MAPKAPK:  | protein_cc chr3  | 50648951 | 50686720 + | 3913  | 2077.227 | 0        | -0.17883 | 0.067866 | -2.63507 | 0.009765 | 0.041319 | 1 |
| ENSG0000 response | Inflamed | ARID5B    | protein_cc chr10 | 63661059 | 63856703 + | 8164  | 1715.597 | 0        | -0.50796 | 0.192807 | -2.63454 | 0.009779 | 0.041373 | 1 |
| ENSG0000 response | Inflamed | HADHA     | protein_cc chr2  | 26413504 | 26467594 - | 3971  | 9983.947 | 0        | 0.329072 | 0.12491  | 2.634473 | 0.009781 | 0.041374 | 1 |
| ENSG0000 response | Inflamed | PLD4      | protein_cc chr14 | 1.05E+08 | 1.05E+08 + | 2321  | 204.8783 | 0        | -0.50369 | 0.19125  | -2.63368 | 0.009802 | 0.041454 | 1 |
| ENSG0000 response | Inflamed | SH2B3     | protein_cc chr12 | 1.12E+08 | 1.12E+08 + | 5682  | 3225.683 | 0        | -0.35231 | 0.133772 | -2.63366 | 0.009803 | 0.041454 | 1 |
| ENSG0000 response | Inflamed | THEM6     | protein_cc chr8  | 1.44E+08 | 1.44E+08 + | 3055  | 1425.277 | 0        | 0.294328 | 0.111765 | 2.633449 | 0.009808 | 0.041471 | 1 |
| ENSG0000 response | Inflamed | BCAR3     | protein_cc chr1  | 94027347 | 94312706 - | 5072  | 1238.885 | 0        | 0.223182 | 0.084755 | 2.633241 | 0.009814 | 0.041488 | 1 |
| ENSG0000 response | Inflamed | SORT1     | protein_cc chr1  | 1.1E+08  | 1.1E+08 -  | 8760  | 6436.804 | 0        | 0.375228 | 0.142527 | 2.632687 | 0.009829 | 0.04154  | 1 |
| ENSG0000 response | Inflamed | CTD-2376I | lincRNA chr5     | 72251033 | 72251526 - | 494   | 9.656325 | 0.033413 | -0.33877 | 0.128681 | -2.63262 | 0.009831 | 0.04154  | 1 |
| ENSG0000 response | Inflamed | JAM2      | protein_cc chr21 | 27011584 | 27089874 + | 5937  | 676.7709 | 0        | -0.44292 | 0.168245 | -2.6326  | 0.009831 | 0.04154  | 1 |
| ENSG0000 response | Inflamed | ZNRF3     | protein_cc chr22 | 29279580 | 29453475 + | 6968  | 568.9737 | 0        | 0.408628 | 0.155236 | 2.632301 | 0.009839 | 0.041568 | 1 |
| ENSG0000 response | Inflamed | RP11-175F | pseudoger chr12  | 1.01E+08 | 1.01E+08 - | 1405  | 53.01193 | 0.02864  | 0.57152  | 0.217252 | 2.630683 | 0.009883 | 0.041741 | 1 |
| ENSG0000 response | Inflamed | PVRL1     | protein_cc chr11 | 1.19E+08 | 1.2E+08 -  | 7701  | 3648.093 | 0        | 0.398092 | 0.151335 | 2.630534 | 0.009887 | 0.041741 | 1 |
| ENSG0000 response | Inflamed | RNF125    | protein_cc chr18 | 29598335 | 29653176 + | 6508  | 660.4821 | 0        | 0.459309 | 0.174607 | 2.630533 | 0.009887 | 0.041741 | 1 |
| ENSG0000 response | Inflamed | DKK2      | protein_cc chr4  | 1.08E+08 | 1.08E+08 - | 4319  | 5.026253 | 0.451074 | -0.58505 | 0.222414 | -2.63048 | 0.009889 | 0.041741 | 1 |
| ENSG0000 response | Inflamed | RASGEF1A  | protein_cc chr10 | 43689983 | 43762367 - | 6073  | 94.40095 | 0        | -0.53893 | 0.204885 | -2.63043 | 0.00989  | 0.041741 | 1 |
| ENSG0000 response | Inflamed | TENM3     | protein_cc chr4  | 1.83E+08 | 1.84E+08 + | 11983 | 178.4248 | 0.02148  | -0.83065 | 0.315787 | -2.63041 | 0.009891 | 0.041741 | 1 |
| ENSG0000 response | Inflamed | PRPS1     | protein_cc chrX  | 1.07E+08 | 1.07E+08 + | 2197  | 559.0788 | 0        | -0.36243 | 0.137785 | -2.63038 | 0.009891 | 0.041741 | 1 |
| ENSG0000 response | Inflamed | LRFN4     | protein_cc chr11 | 66624118 | 66627946 + | 2828  | 1552.857 | 0        | 0.267262 | 0.101615 | 2.630135 | 0.009898 | 0.041763 | 1 |
| ENSG0000 response | Inflamed | TMPPE     | protein_cc chr3  | 33131913 | 33138293 - | 3966  | 166.3103 | 0.00716  | 0.282158 | 0.107285 | 2.629987 | 0.009902 | 0.041773 | 1 |
| ENSG0000 response | Inflamed | ABTB2     | protein_cc chr11 | 34172535 | 34379555 - | 4973  | 1082.42  | 0        | 0.403039 | 0.153273 | 2.629555 | 0.009914 | 0.041816 | 1 |

|                   |          |           |                  |          |          |   |      |          |          |          |          |          |          |          |   |
|-------------------|----------|-----------|------------------|----------|----------|---|------|----------|----------|----------|----------|----------|----------|----------|---|
| ENSG0000 response | Inflamed | FAM90A1   | protein_cc chr12 | 8373856  | 8380214  | - | 2538 | 30.82816 | 0.00716  | -0.43953 | 0.167156 | -2.62942 | 0.009917 | 0.041824 | 1 |
| ENSG0000 response | Inflamed | RP11-216M | pseudoger chr1   | 1.54E+08 | 1.54E+08 | - | 1309 | 4.317422 | 0.145585 | -0.35653 | 0.135665 | -2.62801 | 0.009956 | 0.04198  | 1 |
| ENSG0000 response | Inflamed | CTD-2003C | lincRNA chr11    | 10906432 | 10920869 | - | 947  | 2.49642  | 0.451074 | -0.35092 | 0.13354  | -2.62783 | 0.009961 | 0.041991 | 1 |
| ENSG0000 response | Inflamed | TDRD9     | protein_cc chr14 | 1.04E+08 | 1.05E+08 | + | 5480 | 32.74224 | 0.038186 | -0.63365 | 0.241133 | -2.6278  | 0.009962 | 0.041991 | 1 |
| ENSG0000 response | Inflamed | HRASLS    | protein_cc chr3  | 1.93E+08 | 1.93E+08 | + | 1169 | 1.558473 | 0.668258 | -0.38713 | 0.14736  | -2.6271  | 0.009981 | 0.042064 | 1 |
| ENSG0000 response | Inflamed | RPL39P40  | pseudoger chr21  | 18872997 | 18873142 | - | 146  | 2.76611  | 0.439141 | 0.327922 | 0.124832 | 2.626903 | 0.009986 | 0.042081 | 1 |
| ENSG0000 response | Inflamed | MAL2      | protein_cc chr8  | 1.2E+08  | 1.2E+08  | + | 3431 | 6319.411 | 0        | 0.651549 | 0.248063 | 2.626543 | 0.009996 | 0.042106 | 1 |
| ENSG0000 response | Inflamed | CTD-2547L | lincRNA chr14    | 91724643 | 91725347 | + | 705  | 4.508353 | 0.22673  | -0.42975 | 0.163619 | -2.62654 | 0.009996 | 0.042106 | 1 |
| ENSG0000 response | Inflamed | RUSC2     | protein_cc chr9  | 35490124 | 35561895 | + | 5682 | 746.0549 | 0        | -0.47797 | 0.181979 | -2.62651 | 0.009997 | 0.042106 | 1 |
| ENSG0000 response | Inflamed | OTX1      | protein_cc chr2  | 63277192 | 63284971 | + | 4833 | 8.914081 | 0.386635 | -0.68412 | 0.260509 | -2.62609 | 0.010009 | 0.042147 | 1 |
| ENSG0000 response | Inflamed | TLL2      | protein_cc chr10 | 98124363 | 98273675 | - | 8151 | 63.38186 | 0.002387 | -0.34094 | 0.129837 | -2.62589 | 0.010014 | 0.042163 | 1 |
| ENSG0000 response | Inflamed | HIST1H1C  | protein_cc chr6  | 26055968 | 26056699 | - | 732  | 1408.141 | 0        | -0.37548 | 0.143004 | -2.62564 | 0.010021 | 0.042186 | 1 |
| ENSG0000 response | Inflamed | ITGB3     | protein_cc chr17 | 45331212 | 45421658 | + | 4913 | 228.2482 | 0.01432  | -0.54569 | 0.207844 | -2.62547 | 0.010026 | 0.042199 | 1 |
| ENSG0000 response | Inflamed | CSDC2     | protein_cc chr22 | 41956767 | 41973745 | + | 3250 | 79.56563 | 0.01432  | -0.64866 | 0.247086 | -2.62525 | 0.010032 | 0.042218 | 1 |
| ENSG0000 response | Inflamed | RP11-343M | lincRNA chr1     | 1.21E+08 | 1.21E+08 | + | 1326 | 80.02387 | 0.009547 | -0.50625 | 0.192851 | -2.62508 | 0.010037 | 0.042231 | 1 |
| ENSG0000 response | Inflamed | HTR4-IT1  | sense_intr chr5  | 1.48E+08 | 1.48E+08 | - | 1704 | 1.947494 | 0.587112 | 0.384046 | 0.146303 | 2.625007 | 0.010038 | 0.042232 | 1 |
| ENSG0000 response | Inflamed | FGF10     | protein_cc chr5  | 44303646 | 44389808 | - | 3011 | 50.35561 | 0.011933 | -0.64018 | 0.243915 | -2.62463 | 0.010049 | 0.042268 | 1 |
| ENSG0000 response | Inflamed | CHRNA5    | protein_cc chr15 | 78857862 | 78887611 | + | 3623 | 116.9666 | 0        | 0.375686 | 0.143141 | 2.624579 | 0.01005  | 0.042268 | 1 |
| ENSG0000 response | Inflamed | RP4-613B2 | antisense chr3   | 42643455 | 42695880 | - | 785  | 4.875895 | 0.128878 | -0.3385  | 0.128983 | -2.62436 | 0.010056 | 0.042281 | 1 |
| ENSG0000 response | Inflamed | RP11-71G  | lincRNA chr1     | 1.57E+08 | 1.57E+08 | + | 471  | 2.966587 | 0.424821 | -0.42669 | 0.162587 | -2.62436 | 0.010056 | 0.042281 | 1 |
| ENSG0000 response | Inflamed | MUTYH     | protein_cc chr1  | 45794835 | 45806142 | - | 3909 | 678.568  | 0        | 0.179039 | 0.068231 | 2.624024 | 0.010066 | 0.042313 | 1 |
| ENSG0000 response | Inflamed | G6PC      | protein_cc chr17 | 41052814 | 41065386 | + | 3296 | 39.03819 | 0.644391 | 0.634886 | 0.241969 | 2.623833 | 0.010071 | 0.042324 | 1 |
| ENSG0000 response | Inflamed | CELA3A    | protein_cc chr1  | 22328149 | 22339032 | + | 1224 | 7.653938 | 0.463007 | 0.470313 | 0.179251 | 2.623771 | 0.010072 | 0.042324 | 1 |
| ENSG0000 response | Inflamed | TNMD      | protein_cc chrX  | 99839799 | 99854882 | + | 1610 | 10.51313 | 0.145585 | 0.51865  | 0.197675 | 2.62375  | 0.010073 | 0.042324 | 1 |
| ENSG0000 response | Inflamed | CDC42BPC  | protein_cc chr11 | 64590859 | 64612041 | - | 6112 | 2775.928 | 0        | 0.504739 | 0.19238  | 2.623661 | 0.010076 | 0.042328 | 1 |
| ENSG0000 response | Inflamed | AC069213  | pseudoger chr3   | 1.95E+08 | 1.95E+08 | + | 1680 | 331.8401 | 0.004773 | 0.632888 | 0.241261 | 2.623248 | 0.010087 | 0.042369 | 1 |
| ENSG0000 response | Inflamed | MS4A15    | protein_cc chr11 | 60524426 | 60544205 | + | 2195 | 5.412888 | 0.195704 | 0.375312 | 0.143078 | 2.623123 | 0.01009  | 0.042376 | 1 |
| ENSG0000 response | Inflamed | PQLC1     | protein_cc chr18 | 77662420 | 77711664 | - | 5225 | 2521.914 | 0        | 0.222823 | 0.08495  | 2.623001 | 0.010094 | 0.042384 | 1 |
| ENSG0000 response | Inflamed | TACSTD2   | protein_cc chr1  | 59041099 | 59043166 | - | 2068 | 365.4057 | 0.002387 | -0.71454 | 0.272455 | -2.62262 | 0.010104 | 0.04242  | 1 |
| ENSG0000 response | Inflamed | ATP6V1F   | protein_cc chr7  | 1.29E+08 | 1.29E+08 | + | 789  | 1409.461 | 0        | -0.33092 | 0.126181 | -2.62258 | 0.010106 | 0.04242  | 1 |
| ENSG0000 response | Inflamed | CDH26     | protein_cc chr20 | 58533471 | 58609066 | + | 5759 | 20.12411 | 0.042959 | -0.53796 | 0.205136 | -2.62245 | 0.010109 | 0.042428 | 1 |
| ENSG0000 response | Inflamed | PCAT7     | antisense chr9   | 97317351 | 97330409 | + | 1164 | 32.90692 | 0.02864  | 0.502844 | 0.19177  | 2.622124 | 0.010118 | 0.042459 | 1 |
| ENSG0000 response | Inflamed | NUDT7     | protein_cc chr16 | 77756411 | 77776157 | + | 1502 | 163.9236 | 0        | 0.334888 | 0.127752 | 2.621389 | 0.010138 | 0.042531 | 1 |
| ENSG0000 response | Inflamed | ZFPM2     | protein_cc chr8  | 1.06E+08 | 1.07E+08 | + | 6708 | 93.53222 | 0.01432  | -0.60891 | 0.232286 | -2.62139 | 0.010139 | 0.042531 | 1 |
| ENSG0000 response | Inflamed | GAS6-AS2  | lincRNA chr13    | 1.15E+08 | 1.15E+08 | + | 1952 | 20.09308 | 0.011933 | -0.39767 | 0.151711 | -2.62121 | 0.010143 | 0.042544 | 1 |
| ENSG0000 response | Inflamed | CDPF1     | protein_cc chr22 | 46639908 | 46646576 | - | 2005 | 187.9594 | 0        | -0.19098 | 0.072868 | -2.62084 | 0.010154 | 0.042581 | 1 |
| ENSG0000 response | Inflamed | MCM5      | protein_cc chr22 | 35796056 | 35821423 | + | 7338 | 2423.093 | 0        | -0.27944 | 0.106652 | -2.62007 | 0.010175 | 0.042664 | 1 |
| ENSG0000 response | Inflamed | RP11-249L | pseudoger chr6   | 1.09E+08 | 1.09E+08 | - | 259  | 1.582339 | 0.594272 | -0.28051 | 0.107067 | -2.61992 | 0.010179 | 0.042675 | 1 |
| ENSG0000 response | Inflamed | BPHL      | protein_cc chr6  | 3118608  | 3153812  | + | 5780 | 482.7422 | 0        | 0.243574 | 0.092978 | 2.619711 | 0.010185 | 0.042693 | 1 |
| ENSG0000 response | Inflamed | NEU4      | protein_cc chr2  | 2.43E+08 | 2.43E+08 | + | 4818 | 1395.644 | 0        | 0.63343  | 0.2418   | 2.619646 | 0.010187 | 0.042693 | 1 |

|                   |          |           |                  |          |          |   |       |          |          |          |          |          |          |          |   |
|-------------------|----------|-----------|------------------|----------|----------|---|-------|----------|----------|----------|----------|----------|----------|----------|---|
| ENSG0000 response | Inflamed | CTB-50L17 | protein_cc chr19 | 4528439  | 4540079  | - | 1803  | 9.398568 | 0.133652 | -0.52304 | 0.199723 | -2.61882 | 0.01021  | 0.042783 | 1 |
| ENSG0000 response | Inflamed | CLU10S    | protein_cc chr12 | 92813870 | 92821924 | - | 686   | 2.610979 | 0.52506  | -0.43718 | 0.166942 | -2.61874 | 0.010212 | 0.042786 | 1 |
| ENSG0000 response | Inflamed | ERO1L     | protein_cc chr14 | 53106634 | 53162618 | - | 7548  | 4191.692 | 0        | -0.54593 | 0.208512 | -2.61821 | 0.010227 | 0.042841 | 1 |
| ENSG0000 response | Inflamed | NTNG1     | protein_cc chr1  | 1.08E+08 | 1.08E+08 | + | 9165  | 9.556086 | 0.105012 | -0.56235 | 0.214805 | -2.61793 | 0.010235 | 0.042854 | 1 |
| ENSG0000 response | Inflamed | GAS7      | protein_cc chr17 | 9813926  | 10101868 | - | 10100 | 2614.554 | 0        | -0.4227  | 0.161464 | -2.6179  | 0.010236 | 0.042854 | 1 |
| ENSG0000 response | Inflamed | CCDC106   | protein_cc chr19 | 56152428 | 56164527 | + | 2709  | 319.1862 | 0        | -0.30002 | 0.114606 | -2.61787 | 0.010237 | 0.042854 | 1 |
| ENSG0000 response | Inflamed | ADAM32    | protein_cc chr8  | 38964509 | 39142430 | + | 10044 | 30.91647 | 0.009547 | 0.508094 | 0.194087 | 2.617865 | 0.010237 | 0.042854 | 1 |
| ENSG0000 response | Inflamed | CORO1B    | protein_cc chr11 | 67205519 | 67211292 | - | 2958  | 7701.031 | 0        | 0.204478 | 0.078116 | 2.617633 | 0.010243 | 0.042875 | 1 |
| ENSG0000 response | Inflamed | C11orf35  | protein_cc chr11 | 554855   | 560779   | - | 2934  | 244.8807 | 0        | 0.272868 | 0.104249 | 2.617467 | 0.010248 | 0.042883 | 1 |
| ENSG0000 response | Inflamed | AKAP2     | protein_cc chr9  | 1.13E+08 | 1.13E+08 | + | 8444  | 39.16706 | 0.033413 | -0.55714 | 0.212857 | -2.61745 | 0.010249 | 0.042883 | 1 |
| ENSG0000 response | Inflamed | DRG2      | protein_cc chr17 | 17991200 | 18011285 | + | 7411  | 1163.967 | 0        | -0.13283 | 0.050755 | -2.61707 | 0.010259 | 0.04292  | 1 |
| ENSG0000 response | Inflamed | SLC2A7    | protein_cc chr1  | 9063359  | 9086404  | - | 1539  | 1.336516 | 0.72315  | -0.31324 | 0.119695 | -2.617   | 0.010261 | 0.042921 | 1 |
| ENSG0000 response | Inflamed | PCSK7     | protein_cc chr11 | 1.17E+08 | 1.17E+08 | - | 22303 | 8425.84  | 0        | 0.217655 | 0.083175 | 2.616812 | 0.010266 | 0.042937 | 1 |
| ENSG0000 response | Inflamed | AC132872  | protein_cc chr17 | 80214131 | 80216080 | + | 1950  | 4.916468 | 0.281623 | -0.42758 | 0.163418 | -2.61651 | 0.010275 | 0.042966 | 1 |
| ENSG0000 response | Inflamed | RP5-1132t | pseudoger chr7   | 65490113 | 65496531 | - | 306   | 2.443914 | 0.46778  | 0.303992 | 0.116191 | 2.616319 | 0.01028  | 0.042981 | 1 |
| ENSG0000 response | Inflamed | BTC       | protein_cc chr4  | 75669969 | 75719896 | - | 2816  | 194.2005 | 0        | 0.486829 | 0.186079 | 2.616244 | 0.010282 | 0.042983 | 1 |
| ENSG0000 response | Inflamed | EDN1      | protein_cc chr6  | 12290596 | 12297427 | + | 2033  | 484.8735 | 0        | 0.354325 | 0.135437 | 2.616156 | 0.010285 | 0.042987 | 1 |
| ENSG0000 response | Inflamed | CYB5A     | protein_cc chr18 | 71920530 | 71959251 | - | 6865  | 1480.291 | 0        | 0.263835 | 0.100868 | 2.615661 | 0.010299 | 0.043037 | 1 |
| ENSG0000 response | Inflamed | COPS8     | protein_cc chr2  | 2.38E+08 | 2.38E+08 | + | 4743  | 672.8091 | 0        | -0.26861 | 0.102696 | -2.61561 | 0.0103   | 0.043037 | 1 |
| ENSG0000 response | Inflamed | DCLRE1CP  | pseudoger chr10  | 15057071 | 15130775 | - | 997   | 3.661098 | 0.288783 | -0.442   | 0.168988 | -2.61555 | 0.010302 | 0.043037 | 1 |
| ENSG0000 response | Inflamed | CPB1      | protein_cc chr3  | 1.49E+08 | 1.49E+08 | + | 5703  | 48.49403 | 0.205251 | 1.167996 | 0.446585 | 2.615391 | 0.010306 | 0.043049 | 1 |
| ENSG0000 response | Inflamed | PRKAG2    | protein_cc chr7  | 1.51E+08 | 1.52E+08 | - | 6740  | 1016.895 | 0        | 0.225719 | 0.086309 | 2.615248 | 0.01031  | 0.043059 | 1 |
| ENSG0000 response | Inflamed | CTD-2611c | sense_intr chr19 | 56220176 | 56220486 | + | 311   | 8.863962 | 0.121718 | 0.495597 | 0.189558 | 2.614492 | 0.010332 | 0.043142 | 1 |
| ENSG0000 response | Inflamed | MCMD2     | protein_cc chr8  | 67782984 | 67834283 | + | 6354  | 19.50597 | 0.038186 | 0.505324 | 0.193292 | 2.6143   | 0.010337 | 0.043157 | 1 |
| ENSG0000 response | Inflamed | RP5-1159c | lincRNA chr7     | 7589735  | 7592071  | - | 1655  | 18.6969  | 0.038186 | 0.539776 | 0.206487 | 2.614089 | 0.010343 | 0.043175 | 1 |
| ENSG0000 response | Inflamed | GJA3      | protein_cc chr13 | 20712394 | 20735188 | - | 5211  | 4.677804 | 0.310263 | -0.43822 | 0.167647 | -2.61393 | 0.010348 | 0.043187 | 1 |
| ENSG0000 response | Inflamed | ENKD1     | protein_cc chr16 | 67696848 | 67701168 | - | 2679  | 409.3174 | 0        | -0.21205 | 0.081126 | -2.61382 | 0.010351 | 0.043192 | 1 |
| ENSG0000 response | Inflamed | IGHV1-45  | IG_V_gene chr14  | 1.07E+08 | 1.07E+08 | - | 409   | 148.0811 | 0.105012 | -1.19056 | 0.455495 | -2.61377 | 0.010352 | 0.043192 | 1 |
| ENSG0000 response | Inflamed | XXbac-B47 | sense_intr chr22 | 18487036 | 18490074 | - | 2493  | 1.494033 | 0.620525 | 0.323131 | 0.123641 | 2.613459 | 0.010361 | 0.043222 | 1 |
| ENSG0000 response | Inflamed | GFER      | protein_cc chr16 | 2034208  | 2037750  | + | 2687  | 1461.854 | 0        | 0.234088 | 0.089577 | 2.613245 | 0.010367 | 0.043241 | 1 |
| ENSG0000 response | Inflamed | HIST1H2AI | protein_cc chr6  | 27775899 | 27776429 | + | 531   | 16.06683 | 0.026253 | 0.458739 | 0.175554 | 2.613085 | 0.010371 | 0.043253 | 1 |
| ENSG0000 response | Inflamed | SFRP4     | protein_cc chr7  | 37945543 | 38065297 | - | 3597  | 25.62053 | 0.073986 | -0.82057 | 0.314138 | -2.61214 | 0.010398 | 0.04335  | 1 |
| ENSG0000 response | Inflamed | POU6F1    | protein_cc chr12 | 51580719 | 51611477 | - | 6021  | 397.5704 | 0        | -0.377   | 0.144325 | -2.61213 | 0.010399 | 0.04335  | 1 |
| ENSG0000 response | Inflamed | RP11-113k | pseudoger chr11  | 82822102 | 82822484 | - | 383   | 2.470167 | 0.410501 | -0.35374 | 0.135423 | -2.61209 | 0.0104   | 0.04335  | 1 |
| ENSG0000 response | Inflamed | INPP4A    | protein_cc chr2  | 99061317 | 99210853 | + | 13202 | 1712.37  | 0        | -0.35829 | 0.137175 | -2.61192 | 0.010404 | 0.043363 | 1 |
| ENSG0000 response | Inflamed | RP11-773t | pseudoger chr18  | 12911185 | 12912022 | + | 838   | 1.577566 | 0.599045 | -0.30237 | 0.115793 | -2.61127 | 0.010423 | 0.043433 | 1 |
| ENSG0000 response | Inflamed | Y_RNA     | antisense chr8   | 81396796 | 81397854 | - | 1059  | 41.90931 | 0.009547 | 0.435485 | 0.166809 | 2.610681 | 0.01044  | 0.043496 | 1 |
| ENSG0000 response | Inflamed | GAL3ST2   | protein_cc chr2  | 2.43E+08 | 2.43E+08 | + | 1370  | 905.389  | 0.01432  | 0.8328   | 0.319009 | 2.610585 | 0.010443 | 0.043501 | 1 |
| ENSG0000 response | Inflamed | RP11-314f | antisense chr17  | 4607525  | 4608824  | + | 472   | 3.326969 | 0.250597 | -0.33736 | 0.129249 | -2.61015 | 0.010455 | 0.043545 | 1 |
| ENSG0000 response | Inflamed | RP3-377H  | sense_intr chr12 | 4948121  | 4951841  | + | 560   | 1.167064 | 0.689737 | 0.308403 | 0.118168 | 2.609867 | 0.010463 | 0.043573 | 1 |

|                   |          |            |                  |          |          |   |       |          |          |          |          |          |          |          |   |
|-------------------|----------|------------|------------------|----------|----------|---|-------|----------|----------|----------|----------|----------|----------|----------|---|
| ENSG0000 response | Inflamed | TPM4       | protein_cc chr19 | 16177831 | 16213813 | + | 7412  | 20339.63 | 0        | -0.30118 | 0.115404 | -2.60975 | 0.010466 | 0.043573 | 1 |
| ENSG0000 response | Inflamed | LINC00525  | antisense chr7   | 47801074 | 47806370 | + | 1212  | 18.92363 | 0.140811 | -0.74587 | 0.285806 | -2.60972 | 0.010467 | 0.043573 | 1 |
| ENSG0000 response | Inflamed | RP1L1      | protein_cc chr8  | 10463859 | 10569697 | - | 8881  | 7.042959 | 0.143198 | -0.4404  | 0.168759 | -2.60964 | 0.01047  | 0.043573 | 1 |
| ENSG0000 response | Inflamed | TLN1       | protein_cc chr9  | 35696945 | 35732392 | - | 10076 | 18199.57 | 0        | -0.38612 | 0.147961 | -2.60963 | 0.01047  | 0.043573 | 1 |
| ENSG0000 response | Inflamed | TCF7       | protein_cc chr5  | 1.33E+08 | 1.33E+08 | + | 10063 | 1145.735 | 0        | -0.47251 | 0.181079 | -2.60939 | 0.010477 | 0.043595 | 1 |
| ENSG0000 response | Inflamed | PCDHB10    | protein_cc chr5  | 1.41E+08 | 1.41E+08 | + | 3274  | 45.16229 | 0.023866 | -0.38897 | 0.149073 | -2.60926 | 0.01048  | 0.043603 | 1 |
| ENSG0000 response | Inflamed | RP11-143k  | processed_chr17  | 71161116 | 71192732 | + | 588   | 1.114558 | 0.732697 | 0.258032 | 0.098898 | 2.609082 | 0.010486 | 0.043618 | 1 |
| ENSG0000 response | Inflamed | SLC52A3    | protein_cc chr20 | 740724   | 749131   | - | 3445  | 1470.43  | 0        | 0.451878 | 0.1732   | 2.608998 | 0.010488 | 0.043621 | 1 |
| ENSG0000 response | Inflamed | LOXHD1     | protein_cc chr18 | 44056935 | 44236996 | - | 9020  | 10.56563 | 0.116945 | -0.49159 | 0.18843  | -2.60889 | 0.010491 | 0.043627 | 1 |
| ENSG0000 response | Inflamed | TMCO1      | protein_cc chr1  | 1.66E+08 | 1.66E+08 | - | 3082  | 2334.036 | 0        | 0.274807 | 0.10534  | 2.608752 | 0.010495 | 0.043635 | 1 |
| ENSG0000 response | Inflamed | RP1-120G2  | antisense chr1   | 6264900  | 6265840  | - | 378   | 13.44391 | 0.004773 | 0.335038 | 0.128431 | 2.608707 | 0.010496 | 0.043635 | 1 |
| ENSG0000 response | Inflamed | ARHGEF1    | protein_cc chr19 | 42387228 | 42434302 | + | 8630  | 5318.783 | 0        | -0.34136 | 0.130901 | -2.6078  | 0.010522 | 0.043736 | 1 |
| ENSG0000 response | Inflamed | PAXIP1-AS  | lincRNA chr7     | 1.55E+08 | 1.55E+08 | + | 2256  | 246.2172 | 0        | 0.297721 | 0.114174 | 2.607608 | 0.010528 | 0.043752 | 1 |
| ENSG0000 response | Inflamed | SYK        | protein_cc chr9  | 93564069 | 93660831 | + | 5210  | 4281.983 | 0        | -0.22643 | 0.086842 | -2.60738 | 0.010534 | 0.043773 | 1 |
| ENSG0000 response | Inflamed | KCNMB1     | protein_cc chr5  | 1.7E+08  | 1.7E+08  | - | 6079  | 261.9093 | 0        | -0.55578 | 0.213183 | -2.60707 | 0.010543 | 0.043803 | 1 |
| ENSG0000 response | Inflamed | FOXA1      | protein_cc chr14 | 38059189 | 38069245 | - | 4111  | 1880.01  | 0        | 0.503504 | 0.193143 | 2.606895 | 0.010548 | 0.043816 | 1 |
| ENSG0000 response | Inflamed | ARFIP2     | protein_cc chr11 | 6496910  | 6502666  | - | 4225  | 2428.628 | 0        | 0.159092 | 0.061035 | 2.606586 | 0.010557 | 0.043844 | 1 |
| ENSG0000 response | Inflamed | CA9        | protein_cc chr9  | 35673853 | 35681156 | + | 1670  | 84.93795 | 0.009547 | -0.83632 | 0.320855 | -2.60655 | 0.010558 | 0.043844 | 1 |
| ENSG0000 response | Inflamed | SLC25A30   | lincRNA chr13    | 45992297 | 45994506 | + | 701   | 5.202864 | 0.186158 | 0.349294 | 0.134031 | 2.606077 | 0.010572 | 0.043894 | 1 |
| ENSG0000 response | Inflamed | RP11-113f  | pseudoger chr12  | 53547056 | 53548268 | + | 1213  | 10.6253  | 0.02148  | -0.34858 | 0.133787 | -2.60547 | 0.010589 | 0.043959 | 1 |
| ENSG0000 response | Inflamed | EGFR       | protein_cc chr7  | 55086714 | 55324313 | + | 12961 | 3924.375 | 0        | 0.367563 | 0.141079 | 2.605362 | 0.010593 | 0.043963 | 1 |
| ENSG0000 response | Inflamed | KIF13B     | protein_cc chr8  | 28924796 | 29120641 | - | 11112 | 7841.523 | 0        | 0.348668 | 0.133829 | 2.605325 | 0.010594 | 0.043963 | 1 |
| ENSG0000 response | Inflamed | SGCE       | protein_cc chr7  | 94214542 | 94285521 | - | 2547  | 335.7136 | 0        | -0.40474 | 0.155357 | -2.60524 | 0.010596 | 0.043967 | 1 |
| ENSG0000 response | Inflamed | RANGRF     | protein_cc chr17 | 8191815  | 8193410  | + | 1577  | 490.2005 | 0        | -0.24147 | 0.092696 | -2.60497 | 0.010604 | 0.043992 | 1 |
| ENSG0000 response | Inflamed | EIF4A1P2   | pseudoger chrY   | 5205786  | 5207005  | - | 1220  | 15.45107 | 0.00716  | -0.361   | 0.138617 | -2.6043  | 0.010623 | 0.044065 | 1 |
| ENSG0000 response | Inflamed | hsa-mir-45 | miRNA chr14      | 1.06E+08 | 1.06E+08 | - | 78    | 33.10263 | 0.076372 | -0.75116 | 0.288457 | -2.60404 | 0.010631 | 0.044087 | 1 |
| ENSG0000 response | Inflamed | UBE2J1     | protein_cc chr6  | 90036344 | 90062567 | - | 4290  | 5689.551 | 0        | -0.33797 | 0.129788 | -2.604   | 0.010632 | 0.044087 | 1 |
| ENSG0000 response | Inflamed | SURF4      | protein_cc chr9  | 1.36E+08 | 1.36E+08 | - | 3229  | 14527.57 | 0        | -0.17616 | 0.06765  | -2.60394 | 0.010634 | 0.044087 | 1 |
| ENSG0000 response | Inflamed | FAM83A     | protein_cc chr8  | 1.24E+08 | 1.24E+08 | + | 6312  | 278.8091 | 0.016706 | -0.9018  | 0.346334 | -2.60385 | 0.010636 | 0.044091 | 1 |
| ENSG0000 response | Inflamed | C19orf53   | protein_cc chr19 | 13884982 | 13889276 | + | 1174  | 1439.143 | 0        | -0.27831 | 0.106904 | -2.60334 | 0.010651 | 0.044146 | 1 |
| ENSG0000 response | Inflamed | ELOVL7     | protein_cc chr5  | 60047618 | 60140216 | - | 4586  | 639.1862 | 0        | 0.44847  | 0.1723   | 2.602849 | 0.010665 | 0.044198 | 1 |
| ENSG0000 response | Inflamed | SHANK1     | protein_cc chr19 | 51165084 | 51222707 | - | 7567  | 30.51074 | 0.031026 | -0.5108  | 0.196262 | -2.60263 | 0.010672 | 0.044217 | 1 |
| ENSG0000 response | Inflamed | DEFA5      | protein_cc chr8  | 6912831  | 6914256  | - | 444   | 7066.63  | 0.023866 | 1.532044 | 0.588673 | 2.602539 | 0.010674 | 0.044221 | 1 |
| ENSG0000 response | Inflamed | LRP6       | protein_cc chr12 | 12268959 | 12419946 | - | 10337 | 1082.556 | 0        | 0.482629 | 0.185451 | 2.602463 | 0.010677 | 0.044222 | 1 |
| ENSG0000 response | Inflamed | ACVR1C     | protein_cc chr2  | 1.58E+08 | 1.58E+08 | - | 9195  | 201.1527 | 0.00716  | 0.67662  | 0.259997 | 2.602418 | 0.010678 | 0.044222 | 1 |
| ENSG0000 response | Inflamed | MN1        | protein_cc chr22 | 28144265 | 28197486 | - | 7693  | 183.9379 | 0.00716  | -0.65901 | 0.253271 | -2.60202 | 0.01069  | 0.044264 | 1 |
| ENSG0000 response | Inflamed | STRCP1     | pseudoger chr15  | 43991686 | 44010382 | - | 5328  | 2.713604 | 0.431981 | 0.363312 | 0.139642 | 2.601736 | 0.010698 | 0.04429  | 1 |
| ENSG0000 response | Inflamed | RABEPK     | protein_cc chr9  | 1.28E+08 | 1.28E+08 | + | 3401  | 498.1933 | 0        | -0.16339 | 0.06281  | -2.60126 | 0.010711 | 0.04434  | 1 |
| ENSG0000 response | Inflamed | IFNE       | protein_cc chr9  | 21480841 | 21482312 | - | 1472  | 3.921241 | 0.568019 | -0.57662 | 0.221688 | -2.60104 | 0.010718 | 0.044361 | 1 |
| ENSG0000 response | Inflamed | TWF2       | protein_cc chr3  | 52262626 | 52273276 | - | 1824  | 800.21   | 0        | -0.20777 | 0.079897 | -2.60048 | 0.010735 | 0.044422 | 1 |



|                   |          |            |                  |          |          |   |       |          |          |          |          |          |          |          |   |
|-------------------|----------|------------|------------------|----------|----------|---|-------|----------|----------|----------|----------|----------|----------|----------|---|
| ENSG0000 response | Inflamed | NAGLU      | protein_cc chr17 | 40688190 | 40696467 | + | 3004  | 2033.63  | 0        | -0.18118 | 0.069675 | -2.60028 | 0.01074  | 0.044438 | 1 |
| ENSG0000 response | Inflamed | FNDC3B     | protein_cc chr3  | 1.72E+08 | 1.72E+08 | + | 13299 | 3975.408 | 0        | -0.36035 | 0.138585 | -2.60017 | 0.010743 | 0.044444 | 1 |
| ENSG0000 response | Inflamed | AC008697   | lincRNA chr5     | 1.59E+08 | 1.59E+08 | + | 1990  | 1.754177 | 0.575179 | -0.32627 | 0.125492 | -2.59995 | 0.01075  | 0.044465 | 1 |
| ENSG0000 response | Inflamed | RP11-6I2.3 | lincRNA chr8     | 74964575 | 75012088 | + | 738   | 2.451074 | 0.470167 | -0.40644 | 0.156332 | -2.59985 | 0.010753 | 0.04447  | 1 |
| ENSG0000 response | Inflamed | RP1-168P1  | sense_intr chr16 | 89458783 | 89478972 | - | 420   | 1.997613 | 0.47494  | -0.30455 | 0.11715  | -2.59968 | 0.010758 | 0.044483 | 1 |
| ENSG0000 response | Inflamed | PGM1       | protein_cc chr1  | 64058947 | 64125916 | + | 4090  | 3948.356 | 0        | 0.249452 | 0.095977 | 2.599082 | 0.010775 | 0.044548 | 1 |
| ENSG0000 response | Inflamed | MUC2       | protein_cc chr11 | 1074875  | 1104419  | + | 8693  | 112688.5 | 0        | 0.63249  | 0.243356 | 2.599029 | 0.010777 | 0.044548 | 1 |
| ENSG0000 response | Inflamed | RASGRF2    | protein_cc chr5  | 80256491 | 80525975 | + | 10702 | 427.7924 | 0        | -0.49049 | 0.188732 | -2.59889 | 0.010781 | 0.044557 | 1 |
| ENSG0000 response | Inflamed | CHRM4      | protein_cc chr11 | 46406640 | 46408107 | - | 1468  | 46.4463  | 0.016706 | 0.714936 | 0.275106 | 2.59876  | 0.010785 | 0.044567 | 1 |
| ENSG0000 response | Inflamed | TP53INP1   | protein_cc chr8  | 95938200 | 95961639 | - | 5685  | 2796.623 | 0        | -0.56208 | 0.216305 | -2.59856 | 0.010791 | 0.044584 | 1 |
| ENSG0000 response | Inflamed | ZFYVE28    | protein_cc chr4  | 2271309  | 2420390  | - | 9624  | 1312.597 | 0        | 0.29348  | 0.112958 | 2.598134 | 0.010803 | 0.044629 | 1 |
| ENSG0000 response | Inflamed | IGLJ2      | IG_J_gene chr22  | 23241661 | 23241835 | + | 175   | 2.704057 | 0.465394 | -0.3872  | 0.149055 | -2.59773 | 0.010815 | 0.044667 | 1 |
| ENSG0000 response | Inflamed | WNK3       | protein_cc chrX  | 54219256 | 54385075 | - | 11443 | 15.65871 | 0.064439 | -0.5404  | 0.208029 | -2.5977  | 0.010816 | 0.044667 | 1 |
| ENSG0000 response | Inflamed | JMJD4      | protein_cc chr1  | 2.28E+08 | 2.28E+08 | - | 4315  | 658.8783 | 0        | -0.18396 | 0.070823 | -2.59749 | 0.010822 | 0.044685 | 1 |
| ENSG0000 response | Inflamed | FAM151A    | protein_cc chr1  | 55074855 | 55089229 | - | 2005  | 82.39857 | 0.069212 | 0.883373 | 0.340118 | 2.597255 | 0.010829 | 0.044707 | 1 |
| ENSG0000 response | Inflamed | RP11-100   | pseudoger chr15  | 74770411 | 74782627 | - | 3385  | 2.451074 | 0.520286 | -0.40238 | 0.154937 | -2.59707 | 0.010835 | 0.044723 | 1 |
| ENSG0000 response | Inflamed | HTR4       | protein_cc chr5  | 1.48E+08 | 1.48E+08 | - | 7087  | 167.4511 | 0.019093 | 0.844432 | 0.325216 | 2.596528 | 0.010851 | 0.044782 | 1 |
| ENSG0000 response | Inflamed | AC017048   | lincRNA chr2     | 1.78E+08 | 1.78E+08 | + | 699   | 3.303103 | 0.238663 | -0.34939 | 0.134586 | -2.59603 | 0.010865 | 0.044834 | 1 |
| ENSG0000 response | Inflamed | CTC-786C1  | protein_cc chr16 | 85204882 | 85218969 | + | 777   | 23.53938 | 0.040573 | -0.51769 | 0.199419 | -2.59598 | 0.010867 | 0.044834 | 1 |
| ENSG0000 response | Inflamed | RP13-890   | antisense chr17  | 43246172 | 43248951 | - | 2376  | 13.67064 | 0.026253 | -0.39696 | 0.152941 | -2.59554 | 0.01088  | 0.044881 | 1 |
| ENSG0000 response | Inflamed | CAPN15     | protein_cc chr16 | 577717   | 604636   | + | 7720  | 6592.554 | 0        | 0.275659 | 0.106229 | 2.594942 | 0.010897 | 0.044947 | 1 |
| ENSG0000 response | Inflamed | IGHV3-9    | IG_V_gene chr14  | 1.07E+08 | 1.07E+08 | - | 434   | 9471.599 | 0.045346 | -0.94306 | 0.363519 | -2.59425 | 0.010918 | 0.045024 | 1 |
| ENSG0000 response | Inflamed | RP11-335   | antisense chr12  | 68052771 | 68064699 | - | 777   | 1.136038 | 0.732697 | 0.303411 | 0.116963 | 2.594079 | 0.010923 | 0.045039 | 1 |
| ENSG0000 response | Inflamed | FER1L5     | pseudoger chr2   | 97308474 | 97370624 | + | 10466 | 4.727924 | 0.312649 | -0.48178 | 0.185731 | -2.59394 | 0.010927 | 0.045049 | 1 |
| ENSG0000 response | Inflamed | FAM161B    | protein_cc chr14 | 74398204 | 74417117 | - | 5056  | 218.8926 | 0        | 0.368279 | 0.142002 | 2.593476 | 0.010941 | 0.045099 | 1 |
| ENSG0000 response | Inflamed | C2CD4D     | protein_cc chr1  | 1.52E+08 | 1.52E+08 | - | 1757  | 33.98091 | 0.00716  | 0.391959 | 0.151163 | 2.592953 | 0.010957 | 0.045156 | 1 |
| ENSG0000 response | Inflamed | RP11-28H   | lincRNA chr15    | 80985557 | 80986048 | - | 492   | 6.078759 | 0.143198 | 0.396833 | 0.153061 | 2.59264  | 0.010966 | 0.045187 | 1 |
| ENSG0000 response | Inflamed | IGKV7-3    | IG_V_pseu chr2   | 89214597 | 89214894 | - | 298   | 13.14081 | 0.200477 | -0.6764  | 0.26091  | -2.59245 | 0.010972 | 0.045203 | 1 |
| ENSG0000 response | Inflamed | MIR126     | miRNA chr9       | 1.4E+08  | 1.4E+08  | + | 85    | 5.190931 | 0.243437 | -0.4797  | 0.185057 | -2.59216 | 0.01098  | 0.045232 | 1 |
| ENSG0000 response | Inflamed | LINC00501  | lincRNA chr3     | 1.77E+08 | 1.77E+08 | + | 2046  | 26.98329 | 0.026253 | 0.56225  | 0.216928 | 2.591874 | 0.010989 | 0.04526  | 1 |
| ENSG0000 response | Inflamed | AC139100   | antisense chr18  | 77941563 | 77960875 | + | 2035  | 1.362768 | 0.642005 | 0.305876 | 0.118016 | 2.591812 | 0.010991 | 0.04526  | 1 |
| ENSG0000 response | Inflamed | MGST1      | protein_cc chr12 | 16500076 | 16762193 | + | 6213  | 4138.043 | 0        | 0.359819 | 0.138837 | 2.591665 | 0.010995 | 0.045271 | 1 |
| ENSG0000 response | Inflamed | SLC38A7    | protein_cc chr16 | 58699013 | 58719008 | - | 6991  | 1102.348 | 0        | -0.24324 | 0.093885 | -2.59083 | 0.01102  | 0.045367 | 1 |
| ENSG0000 response | Inflamed | GSTZ1      | protein_cc chr14 | 77787227 | 77797940 | + | 8477  | 678.136  | 0        | 0.248781 | 0.096035 | 2.590529 | 0.011029 | 0.045397 | 1 |
| ENSG0000 response | Inflamed | PER2       | protein_cc chr2  | 2.39E+08 | 2.39E+08 | - | 6877  | 1780.253 | 0        | 0.387267 | 0.149505 | 2.590325 | 0.011035 | 0.045415 | 1 |
| ENSG0000 response | Inflamed | CYP1B1-A   | antisense chr2   | 38302791 | 38408997 | + | 4138  | 18.33652 | 0.040573 | 0.474487 | 0.183188 | 2.590163 | 0.01104  | 0.045428 | 1 |
| ENSG0000 response | Inflamed | MSRB3      | protein_cc chr12 | 65672423 | 65882024 | + | 5791  | 711.8425 | 0        | -0.57527 | 0.222101 | -2.5901  | 0.011042 | 0.045428 | 1 |
| ENSG0000 response | Inflamed | REEP6      | protein_cc chr19 | 1491165  | 1497926  | + | 2030  | 425.7709 | 0        | 0.458613 | 0.177082 | 2.589831 | 0.01105  | 0.045455 | 1 |
| ENSG0000 response | Inflamed | LINC00623  | lincRNA chr1     | 1.44E+08 | 1.44E+08 | - | 5632  | 1.109785 | 0.713604 | -0.23593 | 0.09111  | -2.58953 | 0.011059 | 0.045485 | 1 |
| ENSG0000 response | Inflamed | STX3       | protein_cc chr11 | 59480929 | 59573354 | + | 7624  | 3808.618 | 0        | 0.378158 | 0.146058 | 2.589091 | 0.011072 | 0.045527 | 1 |

|                   |          |           |                  |          |          |   |       |          |          |          |          |          |          |          |   |
|-------------------|----------|-----------|------------------|----------|----------|---|-------|----------|----------|----------|----------|----------|----------|----------|---|
| ENSG0000 response | Inflamed | SRD5A3    | protein_cc chr4  | 56212276 | 56239263 | + | 4420  | 1092.329 | 0        | -0.41361 | 0.159752 | -2.58908 | 0.011073 | 0.045527 | 1 |
| ENSG0000 response | Inflamed | KCTD21    | protein_cc chr11 | 77882295 | 77899868 | - | 4164  | 739.0024 | 0        | -0.16891 | 0.065244 | -2.58891 | 0.011078 | 0.04554  | 1 |
| ENSG0000 response | Inflamed | ZNF554    | protein_cc chr19 | 2819872  | 2835771  | + | 4685  | 219.4702 | 0        | 0.293614 | 0.113417 | 2.588791 | 0.011081 | 0.045548 | 1 |
| ENSG0000 response | Inflamed | SPATA31C  | pseudoger chr9   | 90744220 | 90753361 | - | 3950  | 1.22673  | 0.701671 | -0.30971 | 0.119657 | -2.58835 | 0.011095 | 0.045596 | 1 |
| ENSG0000 response | Inflamed | RP11-397F | lincRNA chr18    | 53443958 | 53448952 | - | 4134  | 6.818616 | 0.128878 | -0.40815 | 0.157697 | -2.5882  | 0.011099 | 0.045604 | 1 |
| ENSG0000 response | Inflamed | TREH      | protein_cc chr11 | 1.19E+08 | 1.19E+08 | - | 3181  | 165.1766 | 0.004773 | 0.619306 | 0.239284 | 2.588165 | 0.0111   | 0.045604 | 1 |
| ENSG0000 response | Inflamed | C6orf123  | protein_cc chr6  | 1.68E+08 | 1.68E+08 | - | 2146  | 45.95943 | 0.01432  | 0.527283 | 0.203746 | 2.587944 | 0.011107 | 0.045624 | 1 |
| ENSG0000 response | Inflamed | RP11-157F | antisense chr20  | 60880488 | 60881381 | - | 681   | 22.78043 | 0.009547 | -0.39619 | 0.153116 | -2.58751 | 0.01112  | 0.04567  | 1 |
| ENSG0000 response | Inflamed | EEF1DP1   | pseudoger chr19  | 14181154 | 14182052 | + | 899   | 13.83294 | 0.011933 | -0.3619  | 0.139905 | -2.58676 | 0.011142 | 0.045756 | 1 |
| ENSG0000 response | Inflamed | STXBP5L   | protein_cc chr3  | 1.21E+08 | 1.21E+08 | + | 11085 | 4.422434 | 0.298329 | 0.498885 | 0.19287  | 2.586645 | 0.011146 | 0.045764 | 1 |
| ENSG0000 response | Inflamed | RP5-1136C | antisense chr7   | 1.48E+08 | 1.48E+08 | - | 2198  | 76.99045 | 0        | -0.21547 | 0.083304 | -2.58653 | 0.011149 | 0.045764 | 1 |
| ENSG0000 response | Inflamed | COG2      | protein_cc chr1  | 2.31E+08 | 2.31E+08 | + | 11086 | 1370.494 | 0        | 0.313154 | 0.121071 | 2.58653  | 0.011149 | 0.045764 | 1 |
| ENSG0000 response | Inflamed | EIF6      | protein_cc chr20 | 33866714 | 33872788 | - | 1631  | 2804.852 | 0        | 0.222639 | 0.086083 | 2.586335 | 0.011155 | 0.045781 | 1 |
| ENSG0000 response | Inflamed | RP11-783k | antisense chr11  | 64013436 | 64015689 | + | 597   | 36.7327  | 0        | -0.48734 | 0.188442 | -2.58614 | 0.011161 | 0.045798 | 1 |
| ENSG0000 response | Inflamed | KRT18     | protein_cc chr12 | 53342655 | 53346685 | + | 3218  | 35578.74 | 0        | 0.415427 | 0.160645 | 2.585991 | 0.011166 | 0.045809 | 1 |
| ENSG0000 response | Inflamed | LINC0046C | lincRNA chr13    | 1.07E+08 | 1.07E+08 | + | 1152  | 3.28401  | 0.477327 | -0.4915  | 0.190069 | -2.58591 | 0.011168 | 0.045813 | 1 |
| ENSG0000 response | Inflamed | TBCEL     | protein_cc chr11 | 1.21E+08 | 1.21E+08 | + | 7020  | 499.8616 | 0        | -0.49595 | 0.191822 | -2.58549 | 0.011181 | 0.045853 | 1 |
| ENSG0000 response | Inflamed | ARRDC1    | protein_cc chr9  | 1.41E+08 | 1.41E+08 | + | 3821  | 3023.389 | 0        | 0.198526 | 0.076786 | 2.585443 | 0.011182 | 0.045853 | 1 |
| ENSG0000 response | Inflamed | IL20RA    | protein_cc chr6  | 1.37E+08 | 1.37E+08 | - | 4673  | 509.1981 | 0.002387 | 0.504451 | 0.195115 | 2.58541  | 0.011183 | 0.045853 | 1 |
| ENSG0000 response | Inflamed | IL12A-AS1 | antisense chr3   | 1.6E+08  | 1.6E+08  | - | 3689  | 1.97136  | 0.527446 | -0.3398  | 0.131435 | -2.58529 | 0.011187 | 0.045861 | 1 |
| ENSG0000 response | Inflamed | LRRC63    | protein_cc chr13 | 46786083 | 46851501 | + | 2868  | 1.644391 | 0.560859 | -0.28989 | 0.112151 | -2.58478 | 0.011202 | 0.045917 | 1 |
| ENSG0000 response | Inflamed | PPP2R1A   | protein_cc chr19 | 52693292 | 52730687 | + | 5338  | 10264.69 | 0        | 0.177829 | 0.068807 | 2.584447 | 0.011213 | 0.045952 | 1 |
| ENSG0000 response | Inflamed | FAM19A1   | protein_cc chr3  | 68053359 | 68594776 | + | 2915  | 14.04057 | 0.131265 | -0.58748 | 0.22732  | -2.58438 | 0.011215 | 0.045953 | 1 |
| ENSG0000 response | Inflamed | HTRA2     | protein_cc chr2  | 74756504 | 74760472 | + | 2998  | 787.0621 | 0        | -0.15956 | 0.061743 | -2.5843  | 0.011217 | 0.045953 | 1 |
| ENSG0000 response | Inflamed | BCAN      | protein_cc chr1  | 1.57E+08 | 1.57E+08 | + | 4931  | 4.412888 | 0.183771 | 0.407925 | 0.15785  | 2.584265 | 0.011218 | 0.045953 | 1 |
| ENSG0000 response | Inflamed | VEGFB     | protein_cc chr11 | 64002010 | 64006259 | + | 1539  | 1433.84  | 0        | -0.26867 | 0.103969 | -2.58416 | 0.011221 | 0.045959 | 1 |
| ENSG0000 response | Inflamed | RP11-31F1 | antisense chr1   | 1.13E+08 | 1.14E+08 | + | 3028  | 31.91408 | 0.00716  | -0.45046 | 0.174326 | -2.58402 | 0.011226 | 0.045969 | 1 |
| ENSG0000 response | Inflamed | HBCBP     | protein_cc chr12 | 57390745 | 57391335 | + | 591   | 1.324582 | 0.680191 | -0.30093 | 0.116468 | -2.58379 | 0.011233 | 0.045991 | 1 |
| ENSG0000 response | Inflamed | CTD-3093I | lincRNA chr19    | 54697731 | 54698394 | + | 664   | 14.13365 | 0.019093 | -0.33546 | 0.129836 | -2.58369 | 0.011236 | 0.045995 | 1 |
| ENSG0000 response | Inflamed | NPW       | protein_cc chr16 | 2059927  | 2070756  | + | 1193  | 20.87351 | 0.004773 | 0.412997 | 0.159857 | 2.583538 | 0.01124  | 0.046008 | 1 |
| ENSG0000 response | Inflamed | BNC2      | protein_cc chr9  | 16409501 | 16870841 | - | 14812 | 355.6516 | 0        | -0.61414 | 0.237724 | -2.58341 | 0.011244 | 0.046016 | 1 |
| ENSG0000 response | Inflamed | R3HCC1    | protein_cc chr8  | 23127633 | 23153792 | + | 2630  | 923.3055 | 0        | -0.1886  | 0.073013 | -2.58308 | 0.011254 | 0.04605  | 1 |
| ENSG0000 response | Inflamed | SLC35E3   | protein_cc chr12 | 69139886 | 69187508 | + | 5612  | 332.7613 | 0        | -0.23284 | 0.090158 | -2.58263 | 0.011268 | 0.0461   | 1 |
| ENSG0000 response | Inflamed | TRIM27    | protein_cc chr6  | 28870779 | 28891766 | - | 7986  | 2924.26  | 0        | -0.17876 | 0.069226 | -2.58225 | 0.01128  | 0.04614  | 1 |
| ENSG0000 response | Inflamed | MDGA1     | protein_cc chr6  | 37600284 | 37667082 | - | 12385 | 423.9451 | 0.002387 | -0.55887 | 0.216442 | -2.58206 | 0.011285 | 0.046151 | 1 |
| ENSG0000 response | Inflamed | CUEDC2    | protein_cc chr10 | 1.04E+08 | 1.04E+08 | - | 1412  | 900.9785 | 0        | -0.22533 | 0.08727  | -2.58202 | 0.011287 | 0.046151 | 1 |
| ENSG0000 response | Inflamed | RP11-745C | antisense chr12  | 66524531 | 66528229 | + | 623   | 12.47733 | 0.195704 | 0.398061 | 0.154169 | 2.581987 | 0.011288 | 0.046151 | 1 |
| ENSG0000 response | Inflamed | EIF4A1P10 | pseudoger chrX   | 91368245 | 91369460 | - | 1216  | 39.24582 | 0        | -0.3263  | 0.126408 | -2.58129 | 0.011309 | 0.046232 | 1 |
| ENSG0000 response | Inflamed | GPR161    | protein_cc chr1  | 1.68E+08 | 1.68E+08 | - | 5902  | 180.1122 | 0        | -0.51653 | 0.200109 | -2.58123 | 0.011311 | 0.046232 | 1 |
| ENSG0000 response | Inflamed | snoU13    | snoRNA chr3      | 32214148 | 32214252 | + | 105   | 1.601432 | 0.591885 | 0.293898 | 0.113866 | 2.581089 | 0.011315 | 0.046242 | 1 |

|                   |          |           |                  |          |          |   |       |          |          |          |          |          |          |          |   |
|-------------------|----------|-----------|------------------|----------|----------|---|-------|----------|----------|----------|----------|----------|----------|----------|---|
| ENSG0000 response | Inflamed | PCDHB4    | protein_cc chr5  | 1.41E+08 | 1.41E+08 | + | 3621  | 66.89499 | 0.019093 | -0.45546 | 0.176488 | -2.58068 | 0.011328 | 0.046286 | 1 |
| ENSG0000 response | Inflamed | RECQL     | protein_cc chr12 | 21621845 | 21654603 | - | 3778  | 621.0859 | 0        | -0.46465 | 0.180083 | -2.58018 | 0.011343 | 0.046342 | 1 |
| ENSG0000 response | Inflamed | ADIRF     | protein_cc chr10 | 88727949 | 88743691 | + | 998   | 1124.589 | 0        | 0.42804  | 0.165932 | 2.579602 | 0.011361 | 0.046407 | 1 |
| ENSG0000 response | Inflamed | EBF3      | protein_cc chr10 | 1.32E+08 | 1.32E+08 | - | 4623  | 64.13604 | 0.059666 | -0.83684 | 0.324426 | -2.57944 | 0.011366 | 0.04642  | 1 |
| ENSG0000 response | Inflamed | RP11-334E | antisense chr11  | 1.19E+08 | 1.19E+08 | + | 894   | 5.415274 | 0.252983 | 0.439098 | 0.170272 | 2.578804 | 0.011385 | 0.046493 | 1 |
| ENSG0000 response | Inflamed | AVPR1B    | protein_cc chr1  | 2.06E+08 | 2.06E+08 | + | 2237  | 12.95704 | 0.136038 | 0.605446 | 0.234852 | 2.577989 | 0.011411 | 0.046589 | 1 |
| ENSG0000 response | Inflamed | NABP1     | protein_cc chr2  | 1.93E+08 | 1.93E+08 | + | 13806 | 1649.439 | 0        | -0.61648 | 0.239143 | -2.57786 | 0.011415 | 0.046598 | 1 |
| ENSG0000 response | Inflamed | RSPH4A    | protein_cc chr6  | 1.17E+08 | 1.17E+08 | + | 2840  | 9.272076 | 0.083532 | -0.46741 | 0.181331 | -2.57768 | 0.01142  | 0.046613 | 1 |
| ENSG0000 response | Inflamed | TTC24     | protein_cc chr1  | 1.57E+08 | 1.57E+08 | + | 2829  | 34.68258 | 0.085919 | -0.68159 | 0.264424 | -2.57763 | 0.011422 | 0.046613 | 1 |
| ENSG0000 response | Inflamed | MIR4728   | miRNA chr17      | 37882748 | 37882814 | + | 67    | 2.174224 | 0.508353 | 0.313142 | 0.121492 | 2.577479 | 0.011426 | 0.046624 | 1 |
| ENSG0000 response | Inflamed | C7orf43   | protein_cc chr7  | 99752043 | 99756338 | - | 3255  | 1771.229 | 0        | 0.225598 | 0.087531 | 2.577341 | 0.011431 | 0.046634 | 1 |
| ENSG0000 response | Inflamed | RP11-87G2 | processed_chr17  | 74946399 | 74965238 | - | 969   | 3.484487 | 0.498807 | -0.47305 | 0.183576 | -2.57688 | 0.011445 | 0.046686 | 1 |
| ENSG0000 response | Inflamed | FAM72D    | protein_cc chr1  | 1.44E+08 | 1.44E+08 | - | 2393  | 25.90692 | 0.01432  | -0.42776 | 0.166012 | -2.57669 | 0.011451 | 0.046702 | 1 |
| ENSG0000 response | Inflamed | CCDC114   | protein_cc chr19 | 48799714 | 48825151 | - | 4299  | 11.29356 | 0.054893 | -0.43043 | 0.167069 | -2.57635 | 0.011461 | 0.046738 | 1 |
| ENSG0000 response | Inflamed | MPC1      | protein_cc chr6  | 1.67E+08 | 1.67E+08 | - | 1525  | 1515.988 | 0        | 0.307377 | 0.119348 | 2.575482 | 0.011488 | 0.04684  | 1 |
| ENSG0000 response | Inflamed | ARR3      | protein_cc chrX  | 69488155 | 69501690 | + | 1719  | 3.591885 | 0.505967 | 0.442756 | 0.171926 | 2.575277 | 0.011495 | 0.046859 | 1 |
| ENSG0000 response | Inflamed | DERA      | protein_cc chr12 | 16064106 | 16190220 | + | 2848  | 1098.217 | 0        | 0.271354 | 0.105374 | 2.575145 | 0.011499 | 0.046869 | 1 |
| ENSG0000 response | Inflamed | ZNF69     | protein_cc chr19 | 11998599 | 12025144 | + | 2931  | 210.2745 | 0        | 0.420267 | 0.163212 | 2.57497  | 0.011504 | 0.046884 | 1 |
| ENSG0000 response | Inflamed | RP11-59E1 | lincRNA chr3     | 1.09E+08 | 1.09E+08 | + | 1958  | 139.8711 | 0.01432  | 0.706819 | 0.274522 | 2.574724 | 0.011512 | 0.046904 | 1 |
| ENSG0000 response | Inflamed | RN7SL728l | misc_RNA chr4    | 1.03E+08 | 1.03E+08 | - | 298   | 1.119332 | 0.713604 | 0.248933 | 0.096684 | 2.574693 | 0.011513 | 0.046904 | 1 |
| ENSG0000 response | Inflamed | PRRG3     | protein_cc chrX  | 1.51E+08 | 1.51E+08 | + | 6364  | 36.179   | 0.031026 | -0.54442 | 0.21147  | -2.57444 | 0.011521 | 0.046929 | 1 |
| ENSG0000 response | Inflamed | MR1       | protein_cc chr1  | 1.81E+08 | 1.81E+08 | + | 9264  | 801.1527 | 0        | -0.35355 | 0.137377 | -2.57359 | 0.011547 | 0.047029 | 1 |
| ENSG0000 response | Inflamed | MRC1L1    | protein_cc chr10 | 17851362 | 17953178 | + | 5261  | 140.3341 | 0.009547 | -0.48616 | 0.188942 | -2.57306 | 0.011564 | 0.04709  | 1 |
| ENSG0000 response | Inflamed | CABP7     | protein_cc chr22 | 30116073 | 30127828 | + | 3259  | 14.7685  | 0.152745 | 0.702523 | 0.273051 | 2.572861 | 0.01157  | 0.047108 | 1 |
| ENSG0000 response | Inflamed | MAP2K2    | protein_cc chr19 | 4090319  | 4124126  | - | 5236  | 7875.298 | 0        | 0.184036 | 0.071536 | 2.572644 | 0.011577 | 0.047128 | 1 |
| ENSG0000 response | Inflamed | PRR11     | protein_cc chr17 | 57232860 | 57282066 | + | 4080  | 369.8305 | 0        | -0.39122 | 0.152078 | -2.57252 | 0.011581 | 0.047135 | 1 |
| ENSG0000 response | Inflamed | CCDC115   | protein_cc chr2  | 1.31E+08 | 1.31E+08 | - | 3782  | 1120.193 | 0        | 0.186707 | 0.072579 | 2.572476 | 0.011582 | 0.047135 | 1 |
| ENSG0000 response | Inflamed | ERGIC2    | protein_cc chr12 | 29490285 | 29534122 | - | 5826  | 687.1862 | 0        | -0.32224 | 0.125268 | -2.57241 | 0.011584 | 0.047136 | 1 |
| ENSG0000 response | Inflamed | RP1-130H2 | protein_cc chr22 | 30681227 | 30695471 | - | 2057  | 1.214797 | 0.677804 | -0.27868 | 0.108342 | -2.57228 | 0.011588 | 0.047145 | 1 |
| ENSG0000 response | Inflamed | ECM2      | protein_cc chr9  | 95256365 | 95298937 | - | 4350  | 105.1885 | 0.00716  | -0.54905 | 0.213456 | -2.5722  | 0.011591 | 0.047148 | 1 |
| ENSG0000 response | Inflamed | RP11-496l | sense_intr chr1  | 2.26E+08 | 2.26E+08 | - | 992   | 1.026253 | 0.72315  | -0.2641  | 0.102695 | -2.57173 | 0.011606 | 0.047202 | 1 |
| ENSG0000 response | Inflamed | SALL4     | protein_cc chr20 | 50400581 | 50419059 | - | 4061  | 27.79714 | 0.059666 | -0.61358 | 0.238621 | -2.57134 | 0.011618 | 0.047237 | 1 |
| ENSG0000 response | Inflamed | SCN8A     | protein_cc chr12 | 51984050 | 52206648 | + | 12457 | 171.8807 | 0.00716  | 0.547111 | 0.212773 | 2.571332 | 0.011618 | 0.047237 | 1 |
| ENSG0000 response | Inflamed | CLIC5     | protein_cc chr6  | 45868045 | 46048132 | - | 5961  | 3685.916 | 0        | 0.680042 | 0.264479 | 2.571257 | 0.01162  | 0.04724  | 1 |
| ENSG0000 response | Inflamed | ITGA10    | protein_cc chr1  | 1.46E+08 | 1.46E+08 | + | 6320  | 139.5752 | 0.004773 | -0.54845 | 0.213337 | -2.5708  | 0.011635 | 0.047282 | 1 |
| ENSG0000 response | Inflamed | COL3A1    | protein_cc chr2  | 1.9E+08  | 1.9E+08  | + | 6816  | 77694.9  | 0        | -0.56753 | 0.220764 | -2.57075 | 0.011636 | 0.047282 | 1 |
| ENSG0000 response | Inflamed | AGER      | protein_cc chr6  | 32148745 | 32152101 | - | 2077  | 238.1933 | 0        | -0.44981 | 0.174971 | -2.57075 | 0.011636 | 0.047282 | 1 |
| ENSG0000 response | Inflamed | CARD14    | protein_cc chr17 | 78143791 | 78183130 | + | 8232  | 161.5394 | 0        | -0.60539 | 0.2355   | -2.57067 | 0.011639 | 0.047286 | 1 |
| ENSG0000 response | Inflamed | ISYNA1    | protein_cc chr19 | 18545198 | 18549111 | - | 3284  | 480.4558 | 0        | -0.36818 | 0.143229 | -2.57059 | 0.011641 | 0.047288 | 1 |
| ENSG0000 response | Inflamed | ZNF91     | protein_cc chr19 | 23487793 | 23578362 | - | 10397 | 773.3747 | 0        | 0.492623 | 0.19165  | 2.570438 | 0.011646 | 0.0473   | 1 |

|                   |          |           |                  |          |          |   |       |          |          |          |          |          |          |          |   |
|-------------------|----------|-----------|------------------|----------|----------|---|-------|----------|----------|----------|----------|----------|----------|----------|---|
| ENSG0000 response | Inflamed | PSEN2     | protein_cc chr1  | 2.27E+08 | 2.27E+08 | + | 3757  | 836.9523 | 0        | -0.17403 | 0.067711 | -2.57019 | 0.011654 | 0.047323 | 1 |
| ENSG0000 response | Inflamed | TRAV1-2   | TR_V_gen chr14   | 22111109 | 22111798 | + | 402   | 11.19093 | 0.081146 | -0.40162 | 0.156264 | -2.57014 | 0.011655 | 0.047323 | 1 |
| ENSG0000 response | Inflamed | KCTD5     | protein_cc chr16 | 2732476  | 2759031  | + | 3420  | 3248.222 | 0        | 0.238967 | 0.092981 | 2.570067 | 0.011658 | 0.047324 | 1 |
| ENSG0000 response | Inflamed | CLUH      | protein_cc chr17 | 2592680  | 2615957  | - | 6900  | 7200.601 | 0        | 0.339279 | 0.132014 | 2.570026 | 0.011659 | 0.047324 | 1 |
| ENSG0000 response | Inflamed | GALK1     | protein_cc chr17 | 73747675 | 73761792 | - | 2891  | 582.253  | 0        | -0.28239 | 0.109883 | -2.56988 | 0.011664 | 0.047336 | 1 |
| ENSG0000 response | Inflamed | MLEC      | protein_cc chr12 | 1.21E+08 | 1.21E+08 | + | 6723  | 31980.8  | 0        | 0.272576 | 0.106084 | 2.569438 | 0.011678 | 0.047384 | 1 |
| ENSG0000 response | Inflamed | RP11-800A | antisense chr11  | 73018280 | 73020406 | - | 1695  | 9.904535 | 0.038186 | -0.42361 | 0.164873 | -2.56932 | 0.011681 | 0.047393 | 1 |
| ENSG0000 response | Inflamed | REN       | protein_cc chr1  | 2.04E+08 | 2.04E+08 | - | 1465  | 15.17184 | 0.174224 | 0.698647 | 0.271945 | 2.569074 | 0.011689 | 0.04741  | 1 |
| ENSG0000 response | Inflamed | AC013283  | miRNA chr12      | 98999652 | 98999738 | + | 87    | 23.51074 | 0.011933 | 0.367092 | 0.142889 | 2.569063 | 0.011689 | 0.04741  | 1 |
| ENSG0000 response | Inflamed | BMP7      | protein_cc chr20 | 55743804 | 55841685 | - | 5418  | 504.3103 | 0        | -0.53683 | 0.209016 | -2.56838 | 0.011711 | 0.04749  | 1 |
| ENSG0000 response | Inflamed | PPARA     | protein_cc chr22 | 46546424 | 46639653 | + | 12069 | 3881.427 | 0        | 0.409977 | 0.159647 | 2.568014 | 0.011723 | 0.047529 | 1 |
| ENSG0000 response | Inflamed | SCNN1D    | protein_cc chr1  | 1215816  | 1227409  | + | 4025  | 127.2387 | 0        | -0.45619 | 0.177648 | -2.56797 | 0.011724 | 0.047529 | 1 |
| ENSG0000 response | Inflamed | CTD-3138f | protein_cc chr19 | 58740831 | 58798173 | + | 1463  | 3.105012 | 0.26969  | -0.33073 | 0.128796 | -2.56789 | 0.011727 | 0.047532 | 1 |
| ENSG0000 response | Inflamed | PPP1R13B  | protein_cc chr14 | 1.04E+08 | 1.04E+08 | - | 9031  | 2541.487 | 0        | 0.31557  | 0.122911 | 2.567475 | 0.01174  | 0.047571 | 1 |
| ENSG0000 response | Inflamed | VILL      | protein_cc chr3  | 38029550 | 38048679 | + | 6476  | 7671.189 | 0        | 0.372628 | 0.145137 | 2.567418 | 0.011741 | 0.047571 | 1 |
| ENSG0000 response | Inflamed | FBLN7     | protein_cc chr2  | 1.13E+08 | 1.13E+08 | + | 6576  | 117.0835 | 0.002387 | -0.44365 | 0.172801 | -2.56741 | 0.011742 | 0.047571 | 1 |
| ENSG0000 response | Inflamed | SREBF2    | protein_cc chr22 | 42229109 | 42303312 | + | 7531  | 14531.6  | 0        | 0.288776 | 0.11249  | 2.567123 | 0.011751 | 0.047599 | 1 |
| ENSG0000 response | Inflamed | CRYBB3    | protein_cc chr22 | 25595817 | 25603330 | + | 867   | 28.53222 | 0.023866 | 0.500281 | 0.194883 | 2.56708  | 0.011752 | 0.047599 | 1 |
| ENSG0000 response | Inflamed | MCUR1     | protein_cc chr6  | 13786789 | 13814800 | - | 6057  | 1474.881 | 0        | 0.218901 | 0.085276 | 2.566978 | 0.011755 | 0.047605 | 1 |
| ENSG0000 response | Inflamed | ARSA      | protein_cc chr22 | 51061182 | 51066607 | - | 2938  | 4064.064 | 0        | -0.25521 | 0.099426 | -2.56683 | 0.01176  | 0.04761  | 1 |
| ENSG0000 response | Inflamed | RP11-148C | pseudoger chr3   | 1.08E+08 | 1.08E+08 | - | 97    | 0.911695 | 0.794749 | 0.25489  | 0.099302 | 2.566825 | 0.01176  | 0.04761  | 1 |
| ENSG0000 response | Inflamed | MLLT4-AS  | processed_chr6   | 1.68E+08 | 1.68E+08 | - | 2362  | 35.71838 | 0.023866 | 0.597361 | 0.232748 | 2.566553 | 0.011769 | 0.047637 | 1 |
| ENSG0000 response | Inflamed | CPA2      | protein_cc chr7  | 1.3E+08  | 1.3E+08  | + | 1829  | 8.78043  | 0.26969  | 0.488015 | 0.190155 | 2.566407 | 0.011774 | 0.047646 | 1 |
| ENSG0000 response | Inflamed | TRAV17    | TR_V_gen chr14   | 22465778 | 22466407 | + | 484   | 17.28878 | 0.045346 | -0.48114 | 0.187479 | -2.56637 | 0.011775 | 0.047646 | 1 |
| ENSG0000 response | Inflamed | AC016700  | processed_chr2   | 70321026 | 70330352 | - | 958   | 3.391408 | 0.343675 | -0.41964 | 0.16353  | -2.56617 | 0.011781 | 0.047665 | 1 |
| ENSG0000 response | Inflamed | CDKN2A    | protein_cc chr9  | 21967751 | 21995300 | - | 4400  | 95.06444 | 0        | -0.4729  | 0.184356 | -2.56517 | 0.011813 | 0.047786 | 1 |
| ENSG0000 response | Inflamed | LINC00884 | antisense chr3   | 1.94E+08 | 1.94E+08 | + | 2922  | 28.7685  | 0        | -0.32045 | 0.124934 | -2.56498 | 0.011819 | 0.047801 | 1 |
| ENSG0000 response | Inflamed | RP4-673D  | pseudoger chr20  | 1645929  | 1688846  | - | 1216  | 3.083532 | 0.424821 | -0.38125 | 0.148641 | -2.56494 | 0.01182  | 0.047801 | 1 |
| ENSG0000 response | Inflamed | CWF19L1   | protein_cc chr10 | 1.02E+08 | 1.02E+08 | - | 3985  | 676.7136 | 0        | -0.25968 | 0.101245 | -2.56483 | 0.011824 | 0.047808 | 1 |
| ENSG0000 response | Inflamed | IL17RC    | protein_cc chr3  | 9958758  | 9975314  | + | 4540  | 1248.57  | 0        | 0.201187 | 0.078443 | 2.56475  | 0.011826 | 0.04781  | 1 |
| ENSG0000 response | Inflamed | RP11-18H  | lincRNA chr4     | 1.53E+08 | 1.53E+08 | + | 2011  | 14.03103 | 0.088305 | -0.54556 | 0.21272  | -2.5647  | 0.011828 | 0.04781  | 1 |
| ENSG0000 response | Inflamed | HEPH      | protein_cc chrX  | 65382391 | 65488709 | + | 7113  | 13004.37 | 0        | 0.419549 | 0.16359  | 2.564642 | 0.01183  | 0.04781  | 1 |
| ENSG0000 response | Inflamed | RABL5     | protein_cc chr7  | 1.01E+08 | 1.01E+08 | - | 3736  | 238.2434 | 0        | -0.2731  | 0.10649  | -2.56453 | 0.011833 | 0.047817 | 1 |
| ENSG0000 response | Inflamed | TMEM191   | lincRNA chr22    | 21820712 | 21825558 | + | 4299  | 17.29117 | 0.002387 | 0.317534 | 0.12383  | 2.564271 | 0.011842 | 0.047843 | 1 |
| ENSG0000 response | Inflamed | S100A7    | protein_cc chr1  | 1.53E+08 | 1.53E+08 | - | 536   | 52.6611  | 0.551313 | -1.23135 | 0.480251 | -2.56397 | 0.011851 | 0.047874 | 1 |
| ENSG0000 response | Inflamed | WDR24     | protein_cc chr16 | 734622   | 740444   | - | 3570  | 601.1671 | 0        | -0.21441 | 0.083634 | -2.56363 | 0.011862 | 0.047911 | 1 |
| ENSG0000 response | Inflamed | HSF5      | protein_cc chr17 | 56497528 | 56565745 | - | 4094  | 6.639618 | 0.26969  | -0.49548 | 0.193286 | -2.56344 | 0.011868 | 0.047928 | 1 |
| ENSG0000 response | Inflamed | PLEKHA2   | protein_cc chr8  | 38758753 | 38831428 | + | 6326  | 2122.759 | 0        | -0.3422  | 0.133498 | -2.56331 | 0.011872 | 0.047938 | 1 |
| ENSG0000 response | Inflamed | RP11-341C | antisense chr12  | 1.04E+08 | 1.04E+08 | - | 1063  | 20.06921 | 0.047733 | 0.542308 | 0.211639 | 2.562417 | 0.011901 | 0.048046 | 1 |
| ENSG0000 response | Inflamed | UGT2B17   | protein_cc chr4  | 69402902 | 69434245 | - | 2077  | 11188.26 | 0.033413 | 1.059271 | 0.413404 | 2.562313 | 0.011904 | 0.048052 | 1 |

|                   |          |                     |       |          |          |   |       |          |          |          |          |          |          |          |   |
|-------------------|----------|---------------------|-------|----------|----------|---|-------|----------|----------|----------|----------|----------|----------|----------|---|
| ENSG0000 response | Inflamed | RP11-190C pseudoger | chr3  | 1.19E+08 | 1.19E+08 | - | 625   | 1.066826 | 0.718377 | -0.26847 | 0.104787 | -2.56205 | 0.011913 | 0.04808  | 1 |
| ENSG0000 response | Inflamed | RP11-122C pseudoger | chr1  | 97144430 | 97145176 | - | 747   | 95.90931 | 0        | 0.2978   | 0.116245 | 2.561825 | 0.01192  | 0.048101 | 1 |
| ENSG0000 response | Inflamed | RP11-305L lincRNA   | chr9  | 93968457 | 93972581 | - | 4125  | 8.828162 | 0.133652 | 0.461704 | 0.180243 | 2.561568 | 0.011928 | 0.048127 | 1 |
| ENSG0000 response | Inflamed | FAM13A protein_cc   | chr4  | 89647106 | 90032549 | - | 13215 | 1533.408 | 0        | 0.447809 | 0.174849 | 2.561123 | 0.011943 | 0.04817  | 1 |
| ENSG0000 response | Inflamed | KIAA0195 protein_cc | chr17 | 73437240 | 73496171 | + | 8854  | 4384.501 | 0        | 0.272479 | 0.106391 | 2.561118 | 0.011943 | 0.04817  | 1 |
| ENSG0000 response | Inflamed | RP11-506I pseudoger | chr5  | 54652136 | 54653351 | - | 1216  | 1.286396 | 0.692124 | 0.30273  | 0.118212 | 2.5609   | 0.01195  | 0.048191 | 1 |
| ENSG0000 response | Inflamed | PGAM1P7 pseudoger   | chrX  | 46506029 | 46506765 | - | 737   | 1.400955 | 0.653938 | -0.29368 | 0.114696 | -2.56049 | 0.011963 | 0.048237 | 1 |
| ENSG0000 response | Inflamed | PCDHGA4 protein_cc  | chr5  | 1.41E+08 | 1.41E+08 | + | 4602  | 18.05489 | 0.045346 | -0.48226 | 0.188376 | -2.56009 | 0.011976 | 0.048282 | 1 |
| ENSG0000 response | Inflamed | METTL21B protein_cc | chr12 | 58165275 | 58176324 | + | 3172  | 278.9093 | 0        | -0.27617 | 0.107878 | -2.55997 | 0.01198  | 0.04829  | 1 |
| ENSG0000 response | Inflamed | RP11-254F lincRNA   | chr2  | 10179219 | 10180790 | - | 1572  | 63.8568  | 0.002387 | -0.36363 | 0.142056 | -2.55977 | 0.011986 | 0.048308 | 1 |
| ENSG0000 response | Inflamed | GALNT3 protein_cc   | chr2  | 1.67E+08 | 1.67E+08 | - | 4686  | 2782.78  | 0        | 0.461038 | 0.180129 | 2.559489 | 0.011995 | 0.048338 | 1 |
| ENSG0000 response | Inflamed | ATHL1 protein_cc    | chr11 | 289135   | 296107   | + | 5260  | 2316.833 | 0        | -0.48246 | 0.188504 | -2.55941 | 0.011998 | 0.048341 | 1 |
| ENSG0000 response | Inflamed | DIRC3 protein_cc    | chr2  | 2.18E+08 | 2.19E+08 | - | 4665  | 14.86396 | 0.047733 | -0.52825 | 0.206403 | -2.55933 | 0.012    | 0.048343 | 1 |
| ENSG0000 response | Inflamed | RWDD2A protein_cc   | chr6  | 83903098 | 83908651 | + | 4686  | 292.1169 | 0        | -0.43455 | 0.169809 | -2.55903 | 0.01201  | 0.048375 | 1 |
| ENSG0000 response | Inflamed | ETV7 protein_cc     | chr6  | 36322419 | 36356164 | - | 2369  | 439.21   | 0        | -0.42324 | 0.165413 | -2.55866 | 0.012022 | 0.048416 | 1 |
| ENSG0000 response | Inflamed | AC006129 lincRNA    | chr19 | 42051554 | 42061832 | + | 1440  | 76.89976 | 0        | -0.6211  | 0.242767 | -2.55844 | 0.012029 | 0.048433 | 1 |
| ENSG0000 response | Inflamed | ETFA protein_cc     | chr15 | 76507696 | 76603813 | - | 5031  | 3498.628 | 0        | 0.305504 | 0.119411 | 2.558421 | 0.01203  | 0.048433 | 1 |
| ENSG0000 response | Inflamed | KEL protein_cc      | chr7  | 1.43E+08 | 1.43E+08 | - | 3923  | 31.49642 | 0.059666 | -0.73452 | 0.287115 | -2.55829 | 0.012034 | 0.048442 | 1 |
| ENSG0000 response | Inflamed | UTF1 protein_cc     | chr10 | 1.35E+08 | 1.35E+08 | + | 1157  | 1.081146 | 0.754177 | -0.30254 | 0.118269 | -2.55812 | 0.01204  | 0.048458 | 1 |
| ENSG0000 response | Inflamed | AC079767 lincRNA    | chr2  | 2.09E+08 | 2.09E+08 | + | 492   | 26.48687 | 0.095465 | -0.71188 | 0.278333 | -2.55767 | 0.012054 | 0.048508 | 1 |
| ENSG0000 response | Inflamed | ACMSD protein_cc    | chr2  | 1.36E+08 | 1.36E+08 | + | 2785  | 6.315036 | 0.725537 | -0.7671  | 0.299936 | -2.55754 | 0.012058 | 0.048518 | 1 |
| ENSG0000 response | Inflamed | PLK1 protein_cc     | chr16 | 23688977 | 23701688 | + | 4760  | 1145.115 | 0        | -0.3206  | 0.125359 | -2.55746 | 0.012061 | 0.048522 | 1 |
| ENSG0000 response | Inflamed | EHHADH protein_cc   | chr3  | 1.85E+08 | 1.85E+08 | - | 4700  | 812.673  | 0        | 0.446905 | 0.174758 | 2.557274 | 0.012067 | 0.048538 | 1 |
| ENSG0000 response | Inflamed | MRPL13 protein_cc   | chr8  | 1.21E+08 | 1.21E+08 | - | 4210  | 761.7184 | 0        | 0.266905 | 0.104382 | 2.557005 | 0.012076 | 0.048566 | 1 |
| ENSG0000 response | Inflamed | TREML1 protein_cc   | chr6  | 41117080 | 41122075 | - | 1483  | 16.42721 | 0.085919 | -0.55866 | 0.218514 | -2.55665 | 0.012087 | 0.048604 | 1 |
| ENSG0000 response | Inflamed | RADIL protein_cc    | chr7  | 4836686  | 4923350  | - | 6745  | 44.95465 | 0.023866 | -0.45747 | 0.178939 | -2.55658 | 0.01209  | 0.048606 | 1 |
| ENSG0000 response | Inflamed | RP11-64K1 sense_ove | chr15 | 40666599 | 40668192 | + | 1594  | 34.84487 | 0.073986 | 0.671184 | 0.262628 | 2.55644  | 0.01212  | 0.048722 | 1 |
| ENSG0000 response | Inflamed | APLF protein_cc     | chr2  | 68694693 | 68858004 | + | 5371  | 41.0358  | 0.002387 | -0.3975  | 0.155555 | -2.55537 | 0.012129 | 0.048747 | 1 |
| ENSG0000 response | Inflamed | TLCD2 protein_cc    | chr17 | 1611064  | 1613732  | - | 991   | 383.8854 | 0        | 0.381042 | 0.149116 | 2.555339 | 0.01213  | 0.048747 | 1 |
| ENSG0000 response | Inflamed | TRMT2A protein_cc   | chr22 | 20099389 | 20104915 | - | 3963  | 1345.601 | 0        | -0.21114 | 0.08263  | -2.55521 | 0.012134 | 0.048753 | 1 |
| ENSG0000 response | Inflamed | DEDD protein_cc     | chr1  | 1.61E+08 | 1.61E+08 | - | 2821  | 1445.406 | 0        | -0.10665 | 0.041738 | -2.55518 | 0.012135 | 0.048753 | 1 |
| ENSG0000 response | Inflamed | P2RY14 protein_cc   | chr3  | 1.51E+08 | 1.51E+08 | - | 2815  | 236.6611 | 0        | -0.50552 | 0.197878 | -2.55469 | 0.012151 | 0.04881  | 1 |
| ENSG0000 response | Inflamed | IGLV7-35 IG_V_pseu  | chr22 | 22804540 | 22804990 | + | 340   | 3.949881 | 0.539379 | -0.52965 | 0.207366 | -2.55415 | 0.012169 | 0.048861 | 1 |
| ENSG0000 response | Inflamed | CTD-2184C antisense | chr14 | 60706839 | 60715483 | - | 3154  | 10.76134 | 0.078759 | 0.425219 | 0.166483 | 2.554121 | 0.01217  | 0.048861 | 1 |
| ENSG0000 response | Inflamed | AC011747 lincRNA    | chr2  | 8699963  | 8723922  | - | 8956  | 115.3986 | 0        | 0.534287 | 0.209188 | 2.554099 | 0.012171 | 0.048861 | 1 |
| ENSG0000 response | Inflamed | PPP1R9A protein_cc  | chr7  | 94536514 | 94925727 | + | 11151 | 376.8258 | 0        | 0.558909 | 0.218835 | 2.55402  | 0.012173 | 0.048861 | 1 |
| ENSG0000 response | Inflamed | SUCNR1 protein_cc   | chr3  | 1.52E+08 | 1.52E+08 | + | 4179  | 62.08592 | 0.004773 | -0.59937 | 0.234677 | -2.55401 | 0.012174 | 0.048861 | 1 |
| ENSG0000 response | Inflamed | TERC lincRNA        | chr3  | 1.69E+08 | 1.69E+08 | - | 541   | 1        | 0.739857 | 0.277929 | 0.108823 | 2.553955 | 0.012175 | 0.048861 | 1 |
| ENSG0000 response | Inflamed | HOXAS protein_cc    | chr7  | 27180671 | 27183287 | - | 1707  | 479.0883 | 0        | 0.482311 | 0.188856 | 2.553861 | 0.012178 | 0.048862 | 1 |
| ENSG0000 response | Inflamed | NPIPA2 protein_cc   | chr16 | 14841923 | 14859270 | + | 1428  | 4.50358  | 0.238663 | 0.372206 | 0.145744 | 2.553835 | 0.012179 | 0.048862 | 1 |

|                   |          |                     |                  |          |          |   |       |          |          |          |          |          |          |          |   |
|-------------------|----------|---------------------|------------------|----------|----------|---|-------|----------|----------|----------|----------|----------|----------|----------|---|
| ENSG0000 response | Inflamed | RP11-327L antisense | chr9             | 35930009 | 35937148 | + | 357   | 1.565632 | 0.603819 | 0.248785 | 0.09744  | 2.553215 | 0.0122   | 0.048936 | 1 |
| ENSG0000 response | Inflamed | GK                  | protein_cc chrX  | 30671476 | 30748725 | + | 4511  | 1198.974 | 0        | -0.57629 | 0.225725 | -2.55307 | 0.012204 | 0.048947 | 1 |
| ENSG0000 response | Inflamed | OXNAD1              | protein_cc chr3  | 16306706 | 16391806 | + | 6056  | 546.8282 | 0        | 0.288693 | 0.113081 | 2.552974 | 0.012208 | 0.048947 | 1 |
| ENSG0000 response | Inflamed | BLOC1S3             | protein_cc chr19 | 45682003 | 45685059 | + | 2666  | 686.0573 | 0        | -0.18871 | 0.073916 | -2.55296 | 0.012208 | 0.048947 | 1 |
| ENSG0000 response | Inflamed | PLCB4               | protein_cc chr20 | 9049410  | 9461889  | + | 6900  | 909.0835 | 0        | 0.565186 | 0.221391 | 2.552886 | 0.01221  | 0.04895  | 1 |
| ENSG0000 response | Inflamed | SP100               | protein_cc chr2  | 2.31E+08 | 2.31E+08 | + | 12691 | 1491.246 | 0        | -0.35973 | 0.14092  | -2.55273 | 0.012216 | 0.048963 | 1 |
| ENSG0000 response | Inflamed | LINC00173           | processed_chr12  | 1.17E+08 | 1.17E+08 | + | 2065  | 33.10979 | 0.047733 | -0.63986 | 0.250696 | -2.55234 | 0.012228 | 0.049005 | 1 |
| ENSG0000 response | Inflamed | DAPP1               | protein_cc chr4  | 1.01E+08 | 1.01E+08 | + | 4548  | 565.6706 | 0        | -0.55475 | 0.217352 | -2.55229 | 0.01223  | 0.049005 | 1 |
| ENSG0000 response | Inflamed | LNx1-AS2            | sense_intr chr4  | 54459123 | 54470214 | + | 887   | 3.386635 | 0.293556 | 0.352503 | 0.13812  | 2.552142 | 0.012235 | 0.049018 | 1 |
| ENSG0000 response | Inflamed | RP11-297L           | processed_chr16  | 67515217 | 67521153 | + | 1640  | 30.4463  | 0        | -0.29323 | 0.1149   | -2.55203 | 0.012238 | 0.049021 | 1 |
| ENSG0000 response | Inflamed | WSB2                | protein_cc chr12 | 1.18E+08 | 1.19E+08 | - | 3537  | 4312.998 | 0        | 0.21311  | 0.083507 | 2.552001 | 0.01224  | 0.049021 | 1 |
| ENSG0000 response | Inflamed | SMO                 | protein_cc chr7  | 1.29E+08 | 1.29E+08 | + | 4311  | 622.6014 | 0        | -0.38532 | 0.150993 | -2.55192 | 0.012242 | 0.049025 | 1 |
| ENSG0000 response | Inflamed | PCSK5               | protein_cc chr9  | 78505560 | 78977255 | + | 12705 | 2087.747 | 0        | 0.542599 | 0.212632 | 2.551823 | 0.012245 | 0.04903  | 1 |
| ENSG0000 response | Inflamed | PVRL3               | protein_cc chr3  | 1.11E+08 | 1.11E+08 | + | 6184  | 899.6587 | 0        | 0.409263 | 0.160424 | 2.551139 | 0.012268 | 0.049112 | 1 |
| ENSG0000 response | Inflamed | FTLP12              | pseudoger chr17  | 16294748 | 16295196 | + | 449   | 1.190931 | 0.708831 | 0.236217 | 0.092595 | 2.551085 | 0.01227  | 0.049112 | 1 |
| ENSG0000 response | Inflamed | AC010525            | lincRNA chr19    | 56207681 | 56208795 | + | 1115  | 31.58711 | 0.042959 | 0.530092 | 0.207803 | 2.550941 | 0.012274 | 0.049119 | 1 |
| ENSG0000 response | Inflamed | ZNF618              | protein_cc chr9  | 1.17E+08 | 1.17E+08 | + | 10384 | 707.6826 | 0        | -0.45638 | 0.178907 | -2.55092 | 0.012275 | 0.049119 | 1 |
| ENSG0000 response | Inflamed | EIF3EP1             | pseudoger chr6   | 74001685 | 74003000 | + | 1316  | 21.46778 | 0.023866 | -0.48677 | 0.190835 | -2.55076 | 0.012281 | 0.049126 | 1 |
| ENSG0000 response | Inflamed | MROH8               | protein_cc chr20 | 35729629 | 35807991 | - | 3880  | 54.2148  | 0        | -0.25746 | 0.100937 | -2.55075 | 0.012281 | 0.049126 | 1 |
| ENSG0000 response | Inflamed | TRAV38-1            | TR_V_gen chr14   | 22739851 | 22740446 | + | 353   | 4.942721 | 0.260143 | -0.44626 | 0.175006 | -2.54996 | 0.012307 | 0.049224 | 1 |
| ENSG0000 response | Inflamed | SYNGR4              | protein_cc chr19 | 48867652 | 48879633 | + | 1240  | 5.711217 | 0.107399 | 0.426424 | 0.167262 | 2.549438 | 0.012324 | 0.049285 | 1 |
| ENSG0000 response | Inflamed | KCNQ1               | protein_cc chr11 | 2465914  | 2870339  | + | 3971  | 3624.523 | 0        | 0.338107 | 0.132663 | 2.548616 | 0.012351 | 0.049387 | 1 |
| ENSG0000 response | Inflamed | FAM69A              | protein_cc chr1  | 93307724 | 93427057 | - | 2574  | 502.179  | 0        | -0.3671  | 0.144049 | -2.54842 | 0.012358 | 0.049405 | 1 |
| ENSG0000 response | Inflamed | SSTR5               | protein_cc chr16 | 1122756  | 1131454  | + | 2718  | 15.11456 | 0.050119 | 0.611408 | 0.23996  | 2.547957 | 0.012373 | 0.049459 | 1 |
| ENSG0000 response | Inflamed | HOXA10              | protein_cc chr7  | 27210210 | 27219880 | - | 3707  | 840.7995 | 0        | 0.244458 | 0.095947 | 2.54784  | 0.012377 | 0.049467 | 1 |
| ENSG0000 response | Inflamed | TMEM39B             | protein_cc chr1  | 32537632 | 32568467 | + | 3464  | 566.2601 | 0        | -0.18062 | 0.070893 | -2.54778 | 0.012379 | 0.049468 | 1 |
| ENSG0000 response | Inflamed | NDUFA6-A            | processed_chr22  | 42486935 | 42535286 | + | 6653  | 176.685  | 0        | 0.258085 | 0.1013   | 2.547715 | 0.012381 | 0.049469 | 1 |
| ENSG0000 response | Inflamed | GPR1                | protein_cc chr2  | 2.07E+08 | 2.07E+08 | - | 2834  | 5.494033 | 0.193317 | -0.46012 | 0.180619 | -2.54745 | 0.01239  | 0.049496 | 1 |
| ENSG0000 response | Inflamed | XXyac-YRlv          | pseudoger chr9   | 14511    | 29739    | - | 2216  | 322.7112 | 0        | 0.266548 | 0.104652 | 2.547002 | 0.012405 | 0.049549 | 1 |
| ENSG0000 response | Inflamed | SIAH3               | protein_cc chr13 | 46354405 | 46425871 | - | 4030  | 4.293556 | 0.353222 | 0.530256 | 0.208216 | 2.546666 | 0.012416 | 0.049586 | 1 |
| ENSG0000 response | Inflamed | HLA-U               | pseudoger chr6   | 29901878 | 29902063 | + | 186   | 11.05251 | 0.25537  | 0.483431 | 0.189836 | 2.546576 | 0.012419 | 0.04959  | 1 |
| ENSG0000 response | Inflamed | RP3-405J1           | pseudoger chr12  | 50611445 | 50612126 | - | 354   | 2.155131 | 0.486874 | 0.327736 | 0.1287   | 2.54651  | 0.012421 | 0.049591 | 1 |
| ENSG0000 response | Inflamed | CTD-2005f           | lincRNA chr11    | 86438397 | 86476307 | + | 503   | 1.174224 | 0.701671 | 0.254964 | 0.100126 | 2.546433 | 0.012424 | 0.049594 | 1 |
| ENSG0000 response | Inflamed | PLEKHA4             | protein_cc chr19 | 49340354 | 49371889 | - | 3851  | 898.2411 | 0        | -0.37091 | 0.145677 | -2.54614 | 0.012434 | 0.049625 | 1 |
| ENSG0000 response | Inflamed | CATSPERG            | protein_cc chr19 | 38826415 | 38861589 | + | 9283  | 93.86396 | 0.002387 | 0.30552  | 0.120001 | 2.545986 | 0.012439 | 0.049639 | 1 |
| ENSG0000 response | Inflamed | CSMD1               | protein_cc chr8  | 2792875  | 4852494  | - | 18700 | 10.81623 | 0.205251 | -0.58795 | 0.230947 | -2.54585 | 0.012444 | 0.04965  | 1 |
| ENSG0000 response | Inflamed | RNASEK              | protein_cc chr17 | 6915736  | 6917851  | + | 1789  | 631.179  | 0        | -0.16526 | 0.064925 | -2.54543 | 0.012457 | 0.049697 | 1 |
| ENSG0000 response | Inflamed | ARHGAP1C            | protein_cc chr4  | 1.49E+08 | 1.49E+08 | + | 10759 | 270.4177 | 0        | -0.36269 | 0.142514 | -2.54496 | 0.012473 | 0.049752 | 1 |
| ENSG0000 response | Inflamed | RP11-563J           | lincRNA chr10    | 6319650  | 6377944  | + | 3086  | 19.50358 | 0.031026 | -0.53732 | 0.211137 | -2.54486 | 0.012476 | 0.049758 | 1 |
| ENSG0000 response | Inflamed | CCL3L1              | protein_cc chr17 | 34623842 | 34625731 | - | 1469  | 25.21002 | 0.229117 | -0.85851 | 0.33737  | -2.54471 | 0.012481 | 0.049771 | 1 |

|                   |          |           |                  |          |          |   |       |          |          |          |          |          |          |          |   |
|-------------------|----------|-----------|------------------|----------|----------|---|-------|----------|----------|----------|----------|----------|----------|----------|---|
| ENSG0000 response | Inflamed | PTPRO     | protein_cc chr12 | 15475331 | 15750333 | + | 7519  | 381.9427 | 0        | 0.638022 | 0.250765 | 2.544308 | 0.012495 | 0.049817 | 1 |
| ENSG0000 response | Inflamed | SSH3      | protein_cc chr11 | 67070919 | 67080078 | + | 3641  | 2398.446 | 0        | 0.262827 | 0.103321 | 2.543784 | 0.012513 | 0.04988  | 1 |
| ENSG0000 response | Inflamed | RP11-893F | antisense chr17  | 48358938 | 48365216 | - | 750   | 7.183771 | 0.243437 | -0.56603 | 0.222535 | -2.54356 | 0.01252  | 0.049894 | 1 |
| ENSG0000 response | Inflamed | ENDOV     | protein_cc chr17 | 78388965 | 78411886 | + | 7253  | 437.8401 | 0        | 0.213367 | 0.083885 | 2.543565 | 0.01252  | 0.049894 | 1 |
| ENSG0000 response | Inflamed | RP4-714D5 | sense_ove chr1   | 1E+08    | 1.01E+08 | + | 5067  | 309.3675 | 0.004773 | 0.838416 | 0.329656 | 2.543305 | 0.012529 | 0.049921 | 1 |
| ENSG0000 response | Inflamed | DUSP10    | protein_cc chr1  | 2.22E+08 | 2.22E+08 | - | 3474  | 251.4535 | 0        | -0.33319 | 0.131014 | -2.54318 | 0.012533 | 0.049931 | 1 |
| ENSG0000 response | Inflamed | PRR7      | protein_cc chr5  | 1.77E+08 | 1.77E+08 | + | 1768  | 99.03341 | 0        | -0.37997 | 0.149417 | -2.54305 | 0.012537 | 0.04994  | 1 |
| ENSG0000 response | Inflamed | PDE6D     | protein_cc chr2  | 2.33E+08 | 2.33E+08 | - | 2850  | 407.4821 | 0        | -0.17816 | 0.070065 | -2.54282 | 0.012545 | 0.049964 | 1 |
| ENSG0000 response | Inflamed | TSNARE1   | protein_cc chr8  | 1.43E+08 | 1.43E+08 | - | 4060  | 454.5036 | 0        | 0.302216 | 0.118855 | 2.542727 | 0.012548 | 0.049969 | 1 |
| ENSG0000 response | Inflamed | AC007182  | antisense chr14  | 76041231 | 76045931 | - | 2159  | 202.9212 | 0.016706 | 0.879589 | 0.345934 | 2.54265  | 0.012551 | 0.049971 | 1 |
| ENSG0000 response | Inflamed | CTD-2021I | protein_cc chr12 | 71441182 | 71512027 | - | 565   | 15.76134 | 0.078759 | 0.596051 | 0.234438 | 2.542465 | 0.012557 | 0.049989 | 1 |
| ENSG0000 response | Inflamed | CTD-2184I | lincRNA chr15    | 52408771 | 52414328 | + | 874   | 1.885442 | 0.572792 | 0.297788 | 0.117175 | 2.541392 | 0.012593 | 0.050121 | 1 |
| ENSG0000 response | Inflamed | WFDC3     | protein_cc chr20 | 44376583 | 44420571 | - | 2405  | 30.52029 | 0.01432  | 0.478392 | 0.188242 | 2.541364 | 0.012594 | 0.050121 | 1 |
| ENSG0000 response | Inflamed | RP1-283K1 | antisense chr6   | 1.34E+08 | 1.34E+08 | - | 631   | 1.22673  | 0.725537 | 0.275373 | 0.108374 | 2.540944 | 0.012608 | 0.05017  | 1 |
| ENSG0000 response | Inflamed | WRAP53    | protein_cc chr17 | 7589389  | 7606820  | + | 5087  | 435.5131 | 0        | -0.15629 | 0.06151  | -2.54085 | 0.012611 | 0.050173 | 1 |
| ENSG0000 response | Inflamed | CREB3L2   | protein_cc chr7  | 1.38E+08 | 1.38E+08 | - | 8788  | 6271.921 | 0        | -0.31563 | 0.124227 | -2.54076 | 0.012615 | 0.050173 | 1 |
| ENSG0000 response | Inflamed | TRIP13    | protein_cc chr5  | 892758   | 919472   | + | 3560  | 266.0406 | 0        | -0.31193 | 0.12277  | -2.54076 | 0.012615 | 0.050173 | 1 |
| ENSG0000 response | Inflamed | SP7       | protein_cc chr12 | 53720362 | 53739099 | - | 3411  | 0.887828 | 0.785203 | -0.248   | 0.097613 | -2.54064 | 0.012619 | 0.05018  | 1 |
| ENSG0000 response | Inflamed | MYO5C     | protein_cc chr15 | 52484519 | 52587995 | - | 10045 | 2581.737 | 0        | 0.535417 | 0.21078  | 2.540169 | 0.012635 | 0.050236 | 1 |
| ENSG0000 response | Inflamed | PAWR      | protein_cc chr12 | 79968759 | 80084877 | - | 11668 | 1788.47  | 0        | 0.45846  | 0.180493 | 2.540052 | 0.012639 | 0.050239 | 1 |
| ENSG0000 response | Inflamed | DPYSL2    | protein_cc chr8  | 26371791 | 26515694 | + | 7052  | 2892.986 | 0        | -0.34008 | 0.133886 | -2.54004 | 0.012639 | 0.050239 | 1 |
| ENSG0000 response | Inflamed | C22orf43  | protein_cc chr22 | 23950639 | 23974508 | - | 1300  | 15.01671 | 0.085919 | 0.480504 | 0.189182 | 2.539905 | 0.012643 | 0.050246 | 1 |
| ENSG0000 response | Inflamed | Z95704.4  | pseudoger chr4   | 48991    | 50018    | - | 1028  | 2.727924 | 0.601432 | -0.51244 | 0.201759 | -2.53987 | 0.012645 | 0.050246 | 1 |
| ENSG0000 response | Inflamed | NDST4     | protein_cc chr4  | 1.16E+08 | 1.16E+08 | - | 3719  | 1.797136 | 0.646778 | 0.412313 | 0.162357 | 2.539554 | 0.012655 | 0.050281 | 1 |
| ENSG0000 response | Inflamed | FLNB      | protein_cc chr3  | 57994127 | 58157982 | + | 13956 | 39791.82 | 0        | 0.365217 | 0.14383  | 2.539231 | 0.012666 | 0.050315 | 1 |
| ENSG0000 response | Inflamed | ZNF503    | protein_cc chr10 | 77157588 | 77161664 | - | 3347  | 548.5036 | 0        | -0.46063 | 0.181408 | -2.53919 | 0.012668 | 0.050315 | 1 |
| ENSG0000 response | Inflamed | LINC00614 | lincRNA chr10    | 27232252 | 27233347 | - | 645   | 0.792363 | 0.792363 | -0.22837 | 0.089942 | -2.53906 | 0.012672 | 0.050319 | 1 |
| ENSG0000 response | Inflamed | ARF6      | protein_cc chr14 | 50359810 | 50361490 | + | 1583  | 4173.203 | 0        | 0.184904 | 0.072824 | 2.539051 | 0.012672 | 0.050319 | 1 |
| ENSG0000 response | Inflamed | C9orf47   | protein_cc chr9  | 91605778 | 91611055 | + | 5050  | 14.98807 | 0.105012 | -0.59881 | 0.235856 | -2.53888 | 0.012678 | 0.050334 | 1 |
| ENSG0000 response | Inflamed | ZNF532    | protein_cc chr18 | 56529832 | 56653712 | + | 11951 | 1319.103 | 0        | -0.48998 | 0.193018 | -2.53853 | 0.01269  | 0.050373 | 1 |
| ENSG0000 response | Inflamed | MYL9      | protein_cc chr20 | 35169887 | 35178228 | + | 1199  | 6021.692 | 0        | -0.57354 | 0.225952 | -2.53832 | 0.012697 | 0.050388 | 1 |
| ENSG0000 response | Inflamed | CCDC135   | protein_cc chr16 | 57728705 | 57765717 | + | 5151  | 3.126492 | 0.408115 | -0.42098 | 0.165849 | -2.53831 | 0.012698 | 0.050388 | 1 |
| ENSG0000 response | Inflamed | NROB1     | protein_cc chrX  | 30322323 | 30327715 | - | 2203  | 1.136038 | 0.739857 | -0.32917 | 0.129694 | -2.53807 | 0.012706 | 0.050398 | 1 |
| ENSG0000 response | Inflamed | TNIP1     | protein_cc chr5  | 1.5E+08  | 1.5E+08  | - | 6145  | 11660.5  | 0        | -0.21061 | 0.08298  | -2.53807 | 0.012706 | 0.050398 | 1 |
| ENSG0000 response | Inflamed | F2RL2     | protein_cc chr5  | 75911307 | 75919259 | - | 3429  | 349.2053 | 0.00716  | -0.66162 | 0.260681 | -2.53804 | 0.012707 | 0.050398 | 1 |
| ENSG0000 response | Inflamed | COMT      | protein_cc chr22 | 19929130 | 19957498 | + | 5195  | 1902.943 | 0        | -0.20231 | 0.079712 | -2.53801 | 0.012708 | 0.050398 | 1 |
| ENSG0000 response | Inflamed | CPN2      | protein_cc chr3  | 1.94E+08 | 1.94E+08 | - | 3028  | 2.093079 | 0.634845 | -0.38437 | 0.15145  | -2.53792 | 0.012711 | 0.050402 | 1 |
| ENSG0000 response | Inflamed | C19orf57  | protein_cc chr19 | 13993161 | 14017265 | - | 3840  | 226.6826 | 0        | 0.362479 | 0.142839 | 2.537674 | 0.012719 | 0.050423 | 1 |
| ENSG0000 response | Inflamed | TENC1     | protein_cc chr12 | 53440753 | 53458156 | + | 8093  | 2900.527 | 0        | -0.40212 | 0.158463 | -2.53765 | 0.01272  | 0.050423 | 1 |
| ENSG0000 response | Inflamed | B3GAT3    | protein_cc chr11 | 62382768 | 62389647 | - | 2428  | 1131.411 | 0        | -0.18551 | 0.073118 | -2.53717 | 0.012736 | 0.050475 | 1 |

|                   |          |           |                  |          |          |   |       |          |          |          |          |          |          |          |   |
|-------------------|----------|-----------|------------------|----------|----------|---|-------|----------|----------|----------|----------|----------|----------|----------|---|
| ENSG0000 response | Inflamed | ELMSAN1   | protein_cc chr14 | 74181825 | 74256988 | - | 13484 | 4091.897 | 0        | 0.399463 | 0.157446 | 2.537136 | 0.012738 | 0.050475 | 1 |
| ENSG0000 response | Inflamed | LINC00883 | lincRNA chr3     | 1.07E+08 | 1.07E+08 | + | 4206  | 40.58473 | 0.009547 | -0.51935 | 0.204702 | -2.5371  | 0.012739 | 0.050475 | 1 |
| ENSG0000 response | Inflamed | ARHGEF35  | protein_cc chr7  | 1.44E+08 | 1.44E+08 | - | 2451  | 314.6301 | 0.004773 | 0.510442 | 0.201211 | 2.536851 | 0.012747 | 0.050502 | 1 |
| ENSG0000 response | Inflamed | MID2      | protein_cc chrX  | 1.07E+08 | 1.07E+08 | + | 3097  | 119.7399 | 0.00716  | -0.41201 | 0.162416 | -2.53675 | 0.012751 | 0.050506 | 1 |
| ENSG0000 response | Inflamed | C14orf142 | protein_cc chr14 | 93669239 | 93673439 | - | 1154  | 323.0811 | 0        | 0.291845 | 0.115049 | 2.536709 | 0.012752 | 0.050506 | 1 |
| ENSG0000 response | Inflamed | RP4-555D1 | lincRNA chr3     | 44158791 | 44163857 | + | 5067  | 79.98568 | 0.057279 | -0.90424 | 0.356478 | -2.5366  | 0.012756 | 0.050508 | 1 |
| ENSG0000 response | Inflamed | SEC14L5   | protein_cc chr16 | 5008318  | 5069159  | + | 6477  | 74.39857 | 0.01432  | 0.742398 | 0.292677 | 2.53658  | 0.012757 | 0.050508 | 1 |
| ENSG0000 response | Inflamed | MPI       | protein_cc chr15 | 75182346 | 75191798 | + | 6328  | 1914.036 | 0        | 0.187531 | 0.073946 | 2.536052 | 0.012775 | 0.050566 | 1 |
| ENSG0000 response | Inflamed | ITIH6     | protein_cc chrX  | 54775332 | 54824673 | - | 5497  | 2.384248 | 0.527446 | 0.446817 | 0.176187 | 2.536034 | 0.012775 | 0.050566 | 1 |
| ENSG0000 response | Inflamed | LRFN5     | protein_cc chr14 | 42076773 | 42373752 | + | 6140  | 50.24344 | 0.050119 | -0.57885 | 0.228262 | -2.53591 | 0.012779 | 0.050575 | 1 |
| ENSG0000 response | Inflamed | DZIP1L    | protein_cc chr3  | 1.38E+08 | 1.38E+08 | - | 5045  | 120.031  | 0.002387 | -0.49701 | 0.196018 | -2.53554 | 0.012792 | 0.050619 | 1 |
| ENSG0000 response | Inflamed | RP11-82L1 | sense_intr chr9  | 91703519 | 91724849 | - | 1038  | 13.40334 | 0.100239 | -0.62801 | 0.247695 | -2.53541 | 0.012797 | 0.050622 | 1 |
| ENSG0000 response | Inflamed | HIF1A-AS1 | lincRNA chr14    | 62147759 | 62162541 | - | 652   | 3.193317 | 0.446301 | -0.43913 | 0.1732   | -2.5354  | 0.012797 | 0.050622 | 1 |
| ENSG0000 response | Inflamed | TCF19     | protein_cc chr6  | 31126319 | 31134936 | + | 3538  | 1050.351 | 0        | -0.23609 | 0.093124 | -2.53519 | 0.012804 | 0.050642 | 1 |
| ENSG0000 response | Inflamed | SEMA5A    | protein_cc chr5  | 9035138  | 9546187  | - | 12097 | 2079.568 | 0        | 0.449396 | 0.177267 | 2.535132 | 0.012806 | 0.050643 | 1 |
| ENSG0000 response | Inflamed | CHST7     | protein_cc chrX  | 46433219 | 46457843 | + | 2289  | 177.6993 | 0        | -0.30505 | 0.120337 | -2.53499 | 0.012811 | 0.050652 | 1 |
| ENSG0000 response | Inflamed | B3GNTL1   | protein_cc chr17 | 80900031 | 81009686 | - | 6891  | 210.8353 | 0        | -0.28004 | 0.110469 | -2.53496 | 0.012812 | 0.050652 | 1 |
| ENSG0000 response | Inflamed | CAMTA1    | protein_cc chr1  | 6845384  | 7829766  | + | 10033 | 786.2482 | 0        | 0.158865 | 0.062674 | 2.534767 | 0.012819 | 0.05067  | 1 |
| ENSG0000 response | Inflamed | CARD10    | protein_cc chr22 | 37886400 | 37915549 | - | 5652  | 3842.68  | 0        | 0.339868 | 0.134095 | 2.534544 | 0.012826 | 0.050692 | 1 |
| ENSG0000 response | Inflamed | BTBD19    | protein_cc chr1  | 45274154 | 45281257 | + | 3520  | 285.1193 | 0.002387 | -0.54139 | 0.213622 | -2.53431 | 0.012834 | 0.050716 | 1 |
| ENSG0000 response | Inflamed | CASR      | protein_cc chr3  | 1.22E+08 | 1.22E+08 | + | 5390  | 26.54893 | 0.02864  | 0.530176 | 0.209222 | 2.534038 | 0.012844 | 0.050746 | 1 |
| ENSG0000 response | Inflamed | SLC25A4   | protein_cc chr4  | 1.86E+08 | 1.86E+08 | + | 4844  | 840.3604 | 0        | 0.210299 | 0.082995 | 2.533882 | 0.012849 | 0.050756 | 1 |
| ENSG0000 response | Inflamed | HCCS      | protein_cc chrX  | 11129421 | 11141198 | + | 2335  | 869.9594 | 0        | 0.198148 | 0.078202 | 2.533808 | 0.012852 | 0.050756 | 1 |
| ENSG0000 response | Inflamed | FOXE3     | protein_cc chr1  | 47881744 | 47883723 | + | 1980  | 9.300716 | 0.124105 | 0.420563 | 0.165982 | 2.533792 | 0.012852 | 0.050756 | 1 |
| ENSG0000 response | Inflamed | RP11-359E | antisense chr10  | 88509511 | 88516055 | - | 6545  | 88.53461 | 0.00716  | 0.386952 | 0.152727 | 2.533615 | 0.012858 | 0.050773 | 1 |
| ENSG0000 response | Inflamed | LINGO2    | protein_cc chr9  | 27948076 | 28670283 | - | 3590  | 1.73747  | 0.634845 | -0.37342 | 0.147388 | -2.53355 | 0.01286  | 0.050774 | 1 |
| ENSG0000 response | Inflamed | UNC5B-AS  | antisense chr10  | 72976981 | 72977985 | - | 707   | 6.334129 | 0.157518 | 0.498173 | 0.196642 | 2.533403 | 0.012866 | 0.050786 | 1 |
| ENSG0000 response | Inflamed | ASAP2     | protein_cc chr2  | 9346894  | 9545812  | + | 7248  | 2953.921 | 0        | 0.428519 | 0.169165 | 2.533142 | 0.012875 | 0.050812 | 1 |
| ENSG0000 response | Inflamed | TFEB      | protein_cc chr6  | 41651716 | 41703997 | - | 5648  | 1184.549 | 0        | -0.22571 | 0.089104 | -2.5331  | 0.012876 | 0.050812 | 1 |
| ENSG0000 response | Inflamed | LINC00322 | lincRNA chr21    | 44742297 | 44751919 | - | 699   | 0.849642 | 0.782816 | -0.30695 | 0.121202 | -2.53254 | 0.012895 | 0.050871 | 1 |
| ENSG0000 response | Inflamed | CALHM3    | protein_cc chr10 | 1.05E+08 | 1.05E+08 | - | 1652  | 3.713604 | 0.498807 | -0.47289 | 0.186729 | -2.53252 | 0.012896 | 0.050871 | 1 |
| ENSG0000 response | Inflamed | FKBP2     | protein_cc chr11 | 64008475 | 64011604 | + | 1608  | 2135.511 | 0        | -0.24648 | 0.097326 | -2.5325  | 0.012897 | 0.050871 | 1 |
| ENSG0000 response | Inflamed | KRT8P8    | pseudoger chrX   | 1.52E+08 | 1.52E+08 | + | 1448  | 4.637232 | 0.229117 | 0.35138  | 0.138759 | 2.532302 | 0.012904 | 0.05089  | 1 |
| ENSG0000 response | Inflamed | NUDT12    | protein_cc chr5  | 1.03E+08 | 1.03E+08 | - | 4304  | 432.8425 | 0        | 0.484516 | 0.191342 | 2.532198 | 0.012907 | 0.050897 | 1 |
| ENSG0000 response | Inflamed | CCDC39    | protein_cc chr3  | 1.8E+08  | 1.81E+08 | - | 7695  | 7.334129 | 0.260143 | -0.53706 | 0.212118 | -2.5319  | 0.012917 | 0.050929 | 1 |
| ENSG0000 response | Inflamed | POMGNT1   | protein_cc chr1  | 46654354 | 46685977 | - | 6366  | 1599.847 | 0        | -0.21    | 0.082947 | -2.53178 | 0.012922 | 0.050939 | 1 |
| ENSG0000 response | Inflamed | LRR1      | protein_cc chr14 | 50065415 | 50081390 | + | 2359  | 442.7279 | 0        | 0.259928 | 0.102676 | 2.531529 | 0.01293  | 0.050965 | 1 |
| ENSG0000 response | Inflamed | TTC16     | protein_cc chr9  | 1.3E+08  | 1.3E+08  | + | 6370  | 18.66587 | 0.062053 | -0.57226 | 0.226072 | -2.5313  | 0.012938 | 0.050988 | 1 |
| ENSG0000 response | Inflamed | SLC25A15  | pseudoger chr13  | 25517713 | 25518636 | + | 290   | 2.097852 | 0.696897 | 0.279217 | 0.110321 | 2.530961 | 0.01295  | 0.051027 | 1 |
| ENSG0000 response | Inflamed | POU5F1    | protein_cc chr6  | 31132119 | 31148508 | - | 2876  | 180.0549 | 0        | 0.625325 | 0.247098 | 2.530673 | 0.01296  | 0.051059 | 1 |



|                   |          |           |                  |          |          |   |       |          |          |          |          |          |          |          |   |
|-------------------|----------|-----------|------------------|----------|----------|---|-------|----------|----------|----------|----------|----------|----------|----------|---|
| ENSG0000 response | Inflamed | LYPLA2    | protein_cc chr1  | 24117460 | 24122029 | + | 2196  | 3313.499 | 0        | 0.175294 | 0.069271 | 2.530559 | 0.012964 | 0.051067 | 1 |
| ENSG0000 response | Inflamed | TAS2R38   | protein_cc chr7  | 1.42E+08 | 1.42E+08 | - | 1143  | 3.011933 | 0.529833 | 0.424178 | 0.167635 | 2.530365 | 0.012971 | 0.051079 | 1 |
| ENSG0000 response | Inflamed | FAM13C    | protein_cc chr10 | 61005890 | 61122939 | - | 6750  | 162.4797 | 0.00716  | -0.64685 | 0.255636 | -2.53036 | 0.012971 | 0.051079 | 1 |
| ENSG0000 response | Inflamed | KCNMB3    | protein_cc chr3  | 1.79E+08 | 1.79E+08 | - | 3234  | 40.47017 | 0.00716  | -0.48025 | 0.189909 | -2.52887 | 0.013022 | 0.051275 | 1 |
| ENSG0000 response | Inflamed | HOOK1     | protein_cc chr1  | 60280458 | 60342050 | + | 6845  | 1103.988 | 0        | 0.602539 | 0.238323 | 2.528252 | 0.013044 | 0.051352 | 1 |
| ENSG0000 response | Inflamed | PTPRH     | protein_cc chr19 | 55692616 | 55720874 | - | 4344  | 7425.9   | 0        | 0.548514 | 0.21697  | 2.528061 | 0.013051 | 0.05137  | 1 |
| ENSG0000 response | Inflamed | LINC00543 | lincRNA chr13    | 28527663 | 28529507 | + | 1845  | 183.7947 | 0.00716  | 0.41902  | 0.165774 | 2.527652 | 0.013065 | 0.051412 | 1 |
| ENSG0000 response | Inflamed | RP11-466C | pseudoger chr11  | 63602139 | 63602415 | - | 277   | 2.653938 | 0.420048 | -0.30988 | 0.122597 | -2.52765 | 0.013065 | 0.051412 | 1 |
| ENSG0000 response | Inflamed | RP5-1157H | antisense chr3   | 52273274 | 52275113 | + | 1101  | 8.093079 | 0.090692 | -0.43374 | 0.171607 | -2.52752 | 0.013069 | 0.051421 | 1 |
| ENSG0000 response | Inflamed | CHCHD3    | protein_cc chr7  | 1.32E+08 | 1.33E+08 | - | 3718  | 1544.305 | 0        | 0.197404 | 0.078105 | 2.527414 | 0.013073 | 0.051422 | 1 |
| ENSG0000 response | Inflamed | FOXP1-IT1 | sense_intr chr3  | 71619406 | 71623608 | - | 3539  | 3.040573 | 0.386635 | 0.385541 | 0.152544 | 2.527401 | 0.013074 | 0.051422 | 1 |
| ENSG0000 response | Inflamed | TUBB8     | protein_cc chr10 | 92828    | 120103   | - | 2856  | 1.916468 | 0.692124 | 0.304772 | 0.120592 | 2.5273   | 0.013077 | 0.051429 | 1 |
| ENSG0000 response | Inflamed | TRAV22    | TR_V_gen chr14   | 22538820 | 22539471 | + | 464   | 6.033413 | 0.167064 | -0.39446 | 0.156085 | -2.52724 | 0.013079 | 0.051429 | 1 |
| ENSG0000 response | Inflamed | GPR12     | protein_cc chr13 | 27329341 | 27334922 | - | 5294  | 2.658711 | 0.556086 | 0.472954 | 0.187149 | 2.527148 | 0.013082 | 0.051434 | 1 |
| ENSG0000 response | Inflamed | ZNF831    | protein_cc chr20 | 57766075 | 57834168 | + | 9404  | 225.7947 | 0.009547 | -0.57797 | 0.228725 | -2.52692 | 0.01309  | 0.051456 | 1 |
| ENSG0000 response | Inflamed | GDPD2     | protein_cc chrX  | 69642881 | 69653240 | + | 2638  | 515.4439 | 0.011933 | 0.808771 | 0.320068 | 2.526876 | 0.013092 | 0.051456 | 1 |
| ENSG0000 response | Inflamed | F2RL3     | protein_cc chr19 | 16999671 | 17003417 | + | 3473  | 366.148  | 0        | -0.48709 | 0.192773 | -2.52677 | 0.013096 | 0.051461 | 1 |
| ENSG0000 response | Inflamed | IGSF8     | protein_cc chr1  | 1.6E+08  | 1.6E+08  | - | 2562  | 2611.909 | 0        | 0.256025 | 0.101328 | 2.526696 | 0.013098 | 0.051461 | 1 |
| ENSG0000 response | Inflamed | PTPRE     | protein_cc chr10 | 1.3E+08  | 1.3E+08  | + | 11299 | 2140.912 | 0        | -0.35428 | 0.140218 | -2.52663 | 0.0131   | 0.051461 | 1 |
| ENSG0000 response | Inflamed | LYPLA2P1  | pseudoger chr6   | 33333325 | 33334020 | - | 696   | 3.389021 | 0.243437 | 0.283522 | 0.112214 | 2.526615 | 0.013101 | 0.051461 | 1 |
| ENSG0000 response | Inflamed | RP11-676J | antisense chr17  | 692984   | 693765   | - | 486   | 2.23389  | 0.551313 | -0.41053 | 0.162503 | -2.52631 | 0.013112 | 0.051495 | 1 |
| ENSG0000 response | Inflamed | RP11-86H  | lincRNA chr1     | 95086707 | 95089740 | - | 2272  | 61.39857 | 0.004773 | 0.329871 | 0.130581 | 2.526184 | 0.013116 | 0.051505 | 1 |
| ENSG0000 response | Inflamed | LINC00264 | lincRNA chr10    | 26878794 | 26883253 | + | 1085  | 4.119332 | 0.312649 | -0.41998 | 0.166255 | -2.52612 | 0.013119 | 0.051507 | 1 |
| ENSG0000 response | Inflamed | ASCL2     | protein_cc chr11 | 2289725  | 2292182  | - | 1852  | 431.253  | 0        | 0.483638 | 0.191499 | 2.525542 | 0.013139 | 0.051571 | 1 |
| ENSG0000 response | Inflamed | ENDOG     | protein_cc chr9  | 1.32E+08 | 1.32E+08 | + | 1172  | 618.2339 | 0        | 0.249713 | 0.098875 | 2.525538 | 0.013139 | 0.051571 | 1 |
| ENSG0000 response | Inflamed | PGPEP1    | protein_cc chr19 | 18451397 | 18480760 | + | 7520  | 3649.499 | 0        | 0.223341 | 0.088435 | 2.525484 | 0.013141 | 0.051571 | 1 |
| ENSG0000 response | Inflamed | TMEM17    | protein_cc chr2  | 62727356 | 62739029 | - | 2982  | 26.14558 | 0.011933 | -0.36882 | 0.146048 | -2.5253  | 0.013147 | 0.051588 | 1 |
| ENSG0000 response | Inflamed | SYNE4     | protein_cc chr19 | 36494209 | 36499695 | - | 2528  | 153.9332 | 0        | 0.476108 | 0.188541 | 2.525222 | 0.01315  | 0.051591 | 1 |
| ENSG0000 response | Inflamed | NIN       | protein_cc chr14 | 51186481 | 51297839 | - | 13683 | 1135.442 | 0        | -0.48062 | 0.19036  | -2.52478 | 0.013165 | 0.05162  | 1 |
| ENSG0000 response | Inflamed | AC007285  | antisense chr7   | 30028216 | 30065276 | + | 953   | 2.107399 | 0.486874 | -0.33219 | 0.131571 | -2.52478 | 0.013166 | 0.05162  | 1 |
| ENSG0000 response | Inflamed | SRL       | protein_cc chr16 | 4239375  | 4292081  | - | 5702  | 53.67303 | 0.019093 | -0.54374 | 0.215363 | -2.52475 | 0.013167 | 0.05162  | 1 |
| ENSG0000 response | Inflamed | RP11-285E | lincRNA chr17    | 75260262 | 75260858 | - | 597   | 3.252983 | 0.362768 | 0.395132 | 0.156504 | 2.524741 | 0.013167 | 0.05162  | 1 |
| ENSG0000 response | Inflamed | MID1IP1-A | antisense chrX   | 38660821 | 38663136 | - | 376   | 1.914081 | 0.484487 | 0.285745 | 0.113178 | 2.524731 | 0.013167 | 0.05162  | 1 |
| ENSG0000 response | Inflamed | RP11-119E | antisense chr20  | 3868886  | 3869515  | - | 441   | 12.59666 | 0.011933 | -0.314   | 0.124383 | -2.52445 | 0.013177 | 0.051652 | 1 |
| ENSG0000 response | Inflamed | EPHB2     | protein_cc chr1  | 23037332 | 23241818 | + | 6341  | 5920.563 | 0        | 0.361556 | 0.143248 | 2.523975 | 0.013194 | 0.051709 | 1 |
| ENSG0000 response | Inflamed | RP11-589H | sense_intr chr8  | 11703663 | 11703900 | - | 238   | 28.31981 | 0.01432  | -0.37994 | 0.150545 | -2.52379 | 0.0132   | 0.051727 | 1 |
| ENSG0000 response | Inflamed | TRAV35    | TR_V_gen chr14   | 22689792 | 22690371 | + | 330   | 4.341289 | 0.274463 | -0.3909  | 0.154892 | -2.52369 | 0.013204 | 0.051731 | 1 |
| ENSG0000 response | Inflamed | GPNMB     | protein_cc chr7  | 23275586 | 23314727 | + | 5956  | 3743.723 | 0        | -0.39759 | 0.157546 | -2.52365 | 0.013205 | 0.051731 | 1 |
| ENSG0000 response | Inflamed | MIR503HC  | lincRNA chrX     | 1.34E+08 | 1.34E+08 | - | 1757  | 60.21957 | 0.004773 | -0.56744 | 0.224872 | -2.52337 | 0.013215 | 0.051762 | 1 |
| ENSG0000 response | Inflamed | RP11-848C | pseudoger chr5   | 68902926 | 68919876 | + | 1073  | 2.556086 | 0.403341 | -0.35059 | 0.138954 | -2.52303 | 0.013227 | 0.051802 | 1 |

|                   |          |           |            |       |          |          |   |       |          |          |          |          |          |          |          |   |
|-------------------|----------|-----------|------------|-------|----------|----------|---|-------|----------|----------|----------|----------|----------|----------|----------|---|
| ENSG0000 response | Inflamed | TRAV2     | TR_V_gene  | chr14 | 22180544 | 22181066 | + | 348   | 9.28401  | 0.126492 | -0.45    | 0.178381 | -2.5227  | 0.013239 | 0.051839 | 1 |
| ENSG0000 response | Inflamed | CLCN7     | protein_cc | chr16 | 1494935  | 1525581  | - | 8119  | 3539.026 | 0        | -0.27221 | 0.107915 | -2.52243 | 0.013248 | 0.051869 | 1 |
| ENSG0000 response | Inflamed | RP11-64D1 | pseudoger  | chr3  | 1.51E+08 | 1.52E+08 | + | 2012  | 33.99523 | 0.01432  | 0.529729 | 0.210022 | 2.522259 | 0.013254 | 0.051885 | 1 |
| ENSG0000 response | Inflamed | ADAMTS1   | protein_cc | chr16 | 77281710 | 77469011 | - | 6678  | 18.77088 | 0.090692 | -0.71292 | 0.282732 | -2.52155 | 0.013279 | 0.051975 | 1 |
| ENSG0000 response | Inflamed | FAM228A   | protein_cc | chr2  | 24397938 | 24423718 | + | 2265  | 4.420048 | 0.295943 | -0.38701 | 0.153483 | -2.52149 | 0.013282 | 0.051976 | 1 |
| ENSG0000 response | Inflamed | RP11-58B1 | lincRNA    | chr3  | 9540045  | 9541253  | - | 1209  | 6.128878 | 0.341289 | 0.579081 | 0.229683 | 2.521221 | 0.013291 | 0.052005 | 1 |
| ENSG0000 response | Inflamed | SLC45A1   | protein_cc | chr1  | 8377886  | 8404227  | + | 2888  | 55.30072 | 0        | -0.42811 | 0.169813 | -2.52104 | 0.013297 | 0.052022 | 1 |
| ENSG0000 response | Inflamed | C22orf15  | protein_cc | chr22 | 24105208 | 24108048 | + | 2086  | 5.677804 | 0.21957  | -0.49393 | 0.195957 | -2.52062 | 0.013312 | 0.052073 | 1 |
| ENSG0000 response | Inflamed | RP1-86D1  | sense_intr | chr6  | 1.29E+08 | 1.29E+08 | - | 1828  | 0.761337 | 0.799523 | 0.271419 | 0.107691 | 2.520349 | 0.013322 | 0.052103 | 1 |
| ENSG0000 response | Inflamed | TAF6      | protein_cc | chr7  | 99704693 | 99717464 | - | 4086  | 1879.334 | 0        | -0.21617 | 0.085784 | -2.5199  | 0.013338 | 0.052157 | 1 |
| ENSG0000 response | Inflamed | HTATIP2   | protein_cc | chr11 | 20385231 | 20405329 | + | 2797  | 2534.749 | 0        | 0.267349 | 0.106102 | 2.519744 | 0.013344 | 0.052172 | 1 |
| ENSG0000 response | Inflamed | C2ORF15   | protein_cc | chr2  | 99757948 | 99767950 | + | 2098  | 37.69928 | 0.002387 | 0.362406 | 0.143842 | 2.519478 | 0.013353 | 0.052201 | 1 |
| ENSG0000 response | Inflamed | RP4-625H1 | lincRNA    | chr6  | 19802395 | 19804983 | - | 2301  | 10.91169 | 0.121718 | -0.47504 | 0.188626 | -2.51842 | 0.013391 | 0.052341 | 1 |
| ENSG0000 response | Inflamed | CALM2     | protein_cc | chr2  | 47387221 | 47403740 | - | 6466  | 11290.17 | 0        | 0.256726 | 0.101954 | 2.518056 | 0.013404 | 0.052383 | 1 |
| ENSG0000 response | Inflamed | AC004840  | lincRNA    | chr7  | 2477398  | 2487485  | + | 2067  | 122.2697 | 0.009547 | -0.35918 | 0.142652 | -2.51784 | 0.013412 | 0.052398 | 1 |
| ENSG0000 response | Inflamed | WNT5B     | protein_cc | chr12 | 1639057  | 1756409  | + | 4305  | 597.2053 | 0        | -0.39052 | 0.15511  | -2.5177  | 0.013416 | 0.052398 | 1 |
| ENSG0000 response | Inflamed | WASF1     | protein_cc | chr6  | 1.1E+08  | 1.11E+08 | - | 3260  | 137.9976 | 0.011933 | -0.43997 | 0.17475  | -2.5177  | 0.013416 | 0.052398 | 1 |
| ENSG0000 response | Inflamed | LRRC20    | protein_cc | chr10 | 72058729 | 72142382 | - | 3547  | 379.8759 | 0        | -0.27984 | 0.111149 | -2.5177  | 0.013416 | 0.052398 | 1 |
| ENSG0000 response | Inflamed | C7orf10   | protein_cc | chr7  | 40174575 | 40900362 | + | 3590  | 141.8998 | 0        | 0.390699 | 0.155183 | 2.517671 | 0.013417 | 0.052398 | 1 |
| ENSG0000 response | Inflamed | MPZL2     | protein_cc | chr11 | 1.18E+08 | 1.18E+08 | - | 4753  | 1516.184 | 0        | 0.370837 | 0.147307 | 2.51744  | 0.013426 | 0.052412 | 1 |
| ENSG0000 response | Inflamed | AC006129  | lincRNA    | chr19 | 42037566 | 42038534 | + | 969   | 6.625298 | 0.205251 | -0.47109 | 0.187132 | -2.51744 | 0.013426 | 0.052412 | 1 |
| ENSG0000 response | Inflamed | YAP1P1    | pseudoger  | chr6  | 1.48E+08 | 1.48E+08 | + | 1393  | 5.026253 | 0.25537  | 0.462578 | 0.183752 | 2.517407 | 0.013427 | 0.052412 | 1 |
| ENSG0000 response | Inflamed | TCTA      | protein_cc | chr3  | 49449639 | 49453908 | + | 2747  | 1610.317 | 0        | 0.154259 | 0.061282 | 2.517195 | 0.013434 | 0.052433 | 1 |
| ENSG0000 response | Inflamed | SIPA1L3   | protein_cc | chr19 | 38397868 | 38699012 | + | 10335 | 6235.675 | 0        | 0.363442 | 0.144392 | 2.517058 | 0.013439 | 0.052445 | 1 |
| ENSG0000 response | Inflamed | BTNL3     | protein_cc | chr5  | 1.8E+08  | 1.8E+08  | + | 2440  | 2489.465 | 0.004773 | 0.76024  | 0.302043 | 2.516991 | 0.013442 | 0.052446 | 1 |
| ENSG0000 response | Inflamed | RP11-707F | antisense  | chr15 | 51749483 | 51752779 | + | 1263  | 1.926014 | 0.720764 | 0.439691 | 0.174698 | 2.516864 | 0.013446 | 0.052456 | 1 |
| ENSG0000 response | Inflamed | AC027612  | pseudoger  | chr2  | 91924752 | 91955465 | + | 2395  | 11.0358  | 0.102625 | 0.561329 | 0.223037 | 2.516755 | 0.01345  | 0.052464 | 1 |
| ENSG0000 response | Inflamed | CLEC4F    | protein_cc | chr2  | 71035775 | 71047732 | - | 2475  | 29.57279 | 0.042959 | 0.638609 | 0.253761 | 2.516578 | 0.013457 | 0.052481 | 1 |
| ENSG0000 response | Inflamed | LMAN1     | protein_cc | chr18 | 56995055 | 57027194 | - | 6767  | 3266.845 | 0        | -0.43551 | 0.173061 | -2.51651 | 0.013459 | 0.052482 | 1 |
| ENSG0000 response | Inflamed | AC016735  | lincRNA    | chr2  | 43228495 | 43233200 | - | 237   | 11.65155 | 0.02148  | 0.421489 | 0.167521 | 2.516043 | 0.013476 | 0.05254  | 1 |
| ENSG0000 response | Inflamed | MYL12B    | protein_cc | chr18 | 3261907  | 3278282  | + | 1761  | 12712.39 | 0        | 0.270433 | 0.107497 | 2.515728 | 0.013487 | 0.052576 | 1 |
| ENSG0000 response | Inflamed | AP000525  | processed  | chr22 | 16147979 | 16193004 | - | 5545  | 11.06921 | 0.164678 | -0.54652 | 0.217281 | -2.51526 | 0.013504 | 0.052634 | 1 |
| ENSG0000 response | Inflamed | PMP2      | protein_cc | chr8  | 82352561 | 82359758 | - | 3608  | 17.43198 | 0.093079 | 0.668292 | 0.265734 | 2.514894 | 0.013517 | 0.052678 | 1 |
| ENSG0000 response | Inflamed | SYNDIG1   | protein_cc | chr20 | 24449835 | 24647252 | + | 2847  | 106.8998 | 0        | -0.4124  | 0.163989 | -2.51482 | 0.01352  | 0.052681 | 1 |
| ENSG0000 response | Inflamed | LAMC1     | protein_cc | chr1  | 1.83E+08 | 1.83E+08 | + | 8406  | 7800.95  | 0        | -0.46661 | 0.185551 | -2.51474 | 0.013523 | 0.052684 | 1 |
| ENSG0000 response | Inflamed | MLPH      | protein_cc | chr2  | 2.38E+08 | 2.38E+08 | + | 7514  | 4384.217 | 0        | 0.363545 | 0.144571 | 2.514649 | 0.013526 | 0.052689 | 1 |
| ENSG0000 response | Inflamed | HSP90B1   | protein_cc | chr12 | 1.04E+08 | 1.04E+08 | + | 4688  | 23889.15 | 0        | -0.39473 | 0.15699  | -2.51439 | 0.013535 | 0.052713 | 1 |
| ENSG0000 response | Inflamed | CFTR      | protein_cc | chr7  | 1.17E+08 | 1.17E+08 | + | 8099  | 3393.057 | 0.004773 | 0.76952  | 0.30605  | 2.514361 | 0.013536 | 0.052713 | 1 |
| ENSG0000 response | Inflamed | RNF216    | protein_cc | chr7  | 5659678  | 5821370  | - | 7619  | 1663.038 | 0        | -0.24957 | 0.09926  | -2.51425 | 0.01354  | 0.052717 | 1 |
| ENSG0000 response | Inflamed | RP11-497E | lincRNA    | chr14 | 85991477 | 85996332 | - | 1747  | 3.198091 | 0.393795 | -0.45875 | 0.182464 | -2.51417 | 0.013543 | 0.052717 | 1 |

|                   |          |           |                  |          |          |   |       |          |          |          |          |          |          |          |   |
|-------------------|----------|-----------|------------------|----------|----------|---|-------|----------|----------|----------|----------|----------|----------|----------|---|
| ENSG0000 response | Inflamed | LCN15     | protein_cc chr9  | 1.4E+08  | 1.4E+08  | - | 2887  | 28.99523 | 0.126492 | 0.698017 | 0.277637 | 2.514133 | 0.013544 | 0.052717 | 1 |
| ENSG0000 response | Inflamed | CTD-2012  | antisense chr16  | 67572460 | 67574009 | - | 530   | 1.923628 | 0.568019 | -0.35338 | 0.140559 | -2.51411 | 0.013545 | 0.052717 | 1 |
| ENSG0000 response | Inflamed | RAB3B     | protein_cc chr1  | 52373628 | 52456436 | - | 12844 | 487.7876 | 0        | 0.5282   | 0.210122 | 2.513778 | 0.013557 | 0.052756 | 1 |
| ENSG0000 response | Inflamed | CTD-3247  | sense_ove chr8   | 22536526 | 22541522 | - | 4997  | 7.990453 | 0.398568 | -0.66547 | 0.264744 | -2.51362 | 0.013563 | 0.05277  | 1 |
| ENSG0000 response | Inflamed | SCN9A     | protein_cc chr2  | 1.67E+08 | 1.67E+08 | - | 10368 | 188.4272 | 0        | 0.614645 | 0.244601 | 2.512846 | 0.013591 | 0.052872 | 1 |
| ENSG0000 response | Inflamed | NCKIPSD   | protein_cc chr3  | 48701364 | 48723797 | - | 3635  | 1304.399 | 0        | 0.211021 | 0.083987 | 2.512535 | 0.013602 | 0.052907 | 1 |
| ENSG0000 response | Inflamed | DYNC2H1   | protein_cc chr11 | 1.03E+08 | 1.03E+08 | + | 14284 | 112.506  | 0.004773 | -0.52222 | 0.207871 | -2.51224 | 0.013613 | 0.052942 | 1 |
| ENSG0000 response | Inflamed | TBCB      | protein_cc chr19 | 36605191 | 36616849 | + | 3326  | 1273.549 | 0        | -0.17121 | 0.068159 | -2.51194 | 0.013624 | 0.052972 | 1 |
| ENSG0000 response | Inflamed | TLR4      | protein_cc chr9  | 1.2E+08  | 1.2E+08  | + | 5256  | 961.969  | 0        | -0.55493 | 0.220919 | -2.51191 | 0.013625 | 0.052972 | 1 |
| ENSG0000 response | Inflamed | CTB-13H5  | pseudoger chr5   | 1.49E+08 | 1.49E+08 | + | 760   | 34.86158 | 0        | 0.310094 | 0.123463 | 2.511644 | 0.013634 | 0.053002 | 1 |
| ENSG0000 response | Inflamed | USP43     | protein_cc chr17 | 9548015  | 9633008  | + | 5068  | 753.6492 | 0        | 0.339247 | 0.135097 | 2.511144 | 0.013653 | 0.053064 | 1 |
| ENSG0000 response | Inflamed | VLDLR     | protein_cc chr9  | 2621834  | 2660053  | + | 9339  | 252.7685 | 0        | 0.506541 | 0.201739 | 2.510875 | 0.013662 | 0.053091 | 1 |
| ENSG0000 response | Inflamed | B4GALNT3  | protein_cc chr12 | 569530   | 672675   | + | 6357  | 8078.938 | 0        | 0.563631 | 0.224479 | 2.510844 | 0.013663 | 0.053091 | 1 |
| ENSG0000 response | Inflamed | RP11-74C1 | pseudoger chr1   | 1.52E+08 | 1.52E+08 | + | 495   | 10.83294 | 0.026253 | 0.35724  | 0.142284 | 2.510757 | 0.013667 | 0.053095 | 1 |
| ENSG0000 response | Inflamed | AC005954  | sense_intr chr19 | 3754618  | 3756657  | - | 337   | 5.577566 | 0.159905 | -0.38395 | 0.152954 | -2.51025 | 0.013685 | 0.053157 | 1 |
| ENSG0000 response | Inflamed | SLC35A4   | protein_cc chr5  | 1.4E+08  | 1.4E+08  | + | 4023  | 5692.041 | 0        | 0.135238 | 0.053875 | 2.510208 | 0.013687 | 0.053157 | 1 |
| ENSG0000 response | Inflamed | RP11-239  | antisense chr6   | 20212318 | 20317970 | + | 380   | 0.973747 | 0.74463  | 0.228996 | 0.091233 | 2.51     | 0.013694 | 0.053179 | 1 |
| ENSG0000 response | Inflamed | CD207     | protein_cc chr2  | 71057347 | 71062952 | - | 1867  | 41.24344 | 0.02148  | 0.596833 | 0.237846 | 2.509325 | 0.013719 | 0.053266 | 1 |
| ENSG0000 response | Inflamed | SPAG5-AS  | processed_chr17  | 26925808 | 26944393 | + | 3833  | 31.96659 | 0.00716  | -0.44652 | 0.177955 | -2.50916 | 0.013725 | 0.053282 | 1 |
| ENSG0000 response | Inflamed | TFPI2     | protein_cc chr7  | 93514709 | 93520303 | - | 2663  | 559.2768 | 0.009547 | -0.99689 | 0.397315 | -2.50907 | 0.013728 | 0.053283 | 1 |
| ENSG0000 response | Inflamed | TNFAIP3   | protein_cc chr6  | 1.38E+08 | 1.38E+08 | + | 5023  | 3569.606 | 0        | -0.45946 | 0.18312  | -2.50904 | 0.013729 | 0.053283 | 1 |
| ENSG0000 response | Inflamed | KDM5D     | protein_cc chrY  | 21865751 | 21906825 | - | 9463  | 1747.635 | 0.300716 | -0.32402 | 0.129154 | -2.50876 | 0.013739 | 0.053314 | 1 |
| ENSG0000 response | Inflamed | CHMP2A    | protein_cc chr19 | 59062933 | 59066491 | - | 2129  | 3657.606 | 0        | 0.198546 | 0.079148 | 2.50854  | 0.013747 | 0.053338 | 1 |
| ENSG0000 response | Inflamed | MVP       | protein_cc chr16 | 29831715 | 29859355 | + | 6136  | 28619.84 | 0        | 0.245155 | 0.097745 | 2.508119 | 0.013763 | 0.053339 | 1 |
| ENSG0000 response | Inflamed | GRHL1     | protein_cc chr2  | 10085341 | 10142411 | + | 8008  | 128.9833 | 0.00716  | -0.58863 | 0.234705 | -2.50796 | 0.013769 | 0.053405 | 1 |
| ENSG0000 response | Inflamed | C11orf95  | lincRNA chr11    | 63527364 | 63536113 | - | 5745  | 770.5418 | 0        | -0.36641 | 0.146106 | -2.50782 | 0.013774 | 0.053417 | 1 |
| ENSG0000 response | Inflamed | RP11-299  | lincRNA chr2     | 1.02E+08 | 1.02E+08 | + | 2476  | 23.36516 | 0.019093 | 0.370528 | 0.147772 | 2.507436 | 0.013788 | 0.053463 | 1 |
| ENSG0000 response | Inflamed | PI16      | protein_cc chr6  | 36922209 | 36932613 | + | 2190  | 44.35322 | 0.038186 | -0.71193 | 0.283938 | -2.50735 | 0.013791 | 0.053468 | 1 |
| ENSG0000 response | Inflamed | SEMA6D    | protein_cc chr15 | 47476298 | 48066420 | + | 8560  | 1519.795 | 0        | 0.537765 | 0.214522 | 2.506804 | 0.013811 | 0.053537 | 1 |
| ENSG0000 response | Inflamed | AC104809  | protein_cc chr2  | 2.42E+08 | 2.42E+08 | + | 5288  | 14.83294 | 0.081146 | -0.54347 | 0.21681  | -2.50669 | 0.013815 | 0.053546 | 1 |
| ENSG0000 response | Inflamed | TTC28     | protein_cc chr22 | 28374004 | 29075853 | - | 12641 | 1093.981 | 0        | -0.3777  | 0.150682 | -2.50658 | 0.013819 | 0.053553 | 1 |
| ENSG0000 response | Inflamed | UBD       | protein_cc chr6  | 29523292 | 29527702 | - | 1087  | 64.54893 | 0.090692 | -0.80732 | 0.322123 | -2.50626 | 0.013831 | 0.053591 | 1 |
| ENSG0000 response | Inflamed | C19orf40  | protein_cc chr19 | 33463115 | 33469128 | + | 2370  | 56.34606 | 0        | -0.26844 | 0.107125 | -2.50589 | 0.013844 | 0.053632 | 1 |
| ENSG0000 response | Inflamed | KDELCP1   | pseudoger chr5   | 1.27E+08 | 1.27E+08 | + | 1509  | 1.801909 | 0.546539 | 0.371882 | 0.148405 | 2.50586  | 0.013846 | 0.053632 | 1 |
| ENSG0000 response | Inflamed | TMEM102   | protein_cc chr17 | 7338762  | 7340998  | + | 2129  | 775.0191 | 0        | 0.190021 | 0.075843 | 2.505461 | 0.01386  | 0.053681 | 1 |
| ENSG0000 response | Inflamed | RP5-1024  | antisense chr1   | 53704282 | 53708455 | + | 1181  | 12.9284  | 0.00716  | -0.28606 | 0.114182 | -2.50529 | 0.013867 | 0.053698 | 1 |
| ENSG0000 response | Inflamed | KLHDC8A   | protein_cc chr1  | 2.05E+08 | 2.05E+08 | - | 3624  | 24.30549 | 0.01432  | -0.47196 | 0.188395 | -2.50517 | 0.013871 | 0.053706 | 1 |
| ENSG0000 response | Inflamed | MGAT4A    | protein_cc chr2  | 99235569 | 99347589 | - | 9630  | 3094.074 | 0        | 0.465786 | 0.185971 | 2.504612 | 0.013892 | 0.053779 | 1 |
| ENSG0000 response | Inflamed | NAPEPLD   | protein_cc chr7  | 1.03E+08 | 1.03E+08 | - | 7561  | 1040.384 | 0        | 0.5196   | 0.207491 | 2.504202 | 0.013907 | 0.053828 | 1 |
| ENSG0000 response | Inflamed | ATP10A    | protein_cc chr15 | 25922420 | 26110317 | - | 8406  | 275.5656 | 0        | -0.36863 | 0.147207 | -2.50415 | 0.013909 | 0.053828 | 1 |

|                   |          |           |            |       |          |          |   |      |          |          |          |          |          |          |          |   |
|-------------------|----------|-----------|------------|-------|----------|----------|---|------|----------|----------|----------|----------|----------|----------|----------|---|
| ENSG0000 response | Inflamed | LINC00311 | lincRNA    | chr16 | 85316564 | 85319569 | + | 1566 | 1.50358  | 0.613365 | -0.32184 | 0.128531 | -2.50396 | 0.013916 | 0.053849 | 1 |
| ENSG0000 response | Inflamed | TLR12P    | pseudoger  | chr1  | 33931850 | 33934555 | + | 2706 | 2.210024 | 0.51074  | 0.341193 | 0.136274 | 2.503731 | 0.013924 | 0.053873 | 1 |
| ENSG0000 response | Inflamed | RP11-378J | antisense  | chr1  | 2.23E+08 | 2.23E+08 | - | 2646 | 11.26253 | 0.085919 | -0.47548 | 0.189925 | -2.50351 | 0.013932 | 0.053896 | 1 |
| ENSG0000 response | Inflamed | BACH2     | protein_cc | chr6  | 90636248 | 91006627 | - | 9786 | 215.7494 | 0.01432  | -0.75849 | 0.302979 | -2.50345 | 0.013934 | 0.053897 | 1 |
| ENSG0000 response | Inflamed | VPS18     | protein_cc | chr15 | 41186628 | 41196173 | + | 4049 | 1642.093 | 0        | -0.2405  | 0.096097 | -2.50273 | 0.013961 | 0.053993 | 1 |
| ENSG0000 response | Inflamed | ENPP7     | protein_cc | chr17 | 77704681 | 77716021 | + | 3549 | 25.67303 | 0.217184 | -0.51038 | 0.204002 | -2.50185 | 0.013994 | 0.054111 | 1 |
| ENSG0000 response | Inflamed | C15orf57  | protein_cc | chr15 | 40820882 | 40857256 | - | 8648 | 726.8401 | 0        | -0.20907 | 0.08358  | -2.50145 | 0.014009 | 0.05416  | 1 |
| ENSG0000 response | Inflamed | RP11-375I | antisense  | chr1  | 1.66E+08 | 1.66E+08 | + | 594  | 4.768496 | 0.24821  | 0.434192 | 0.173581 | 2.501384 | 0.014011 | 0.054161 | 1 |
| ENSG0000 response | Inflamed | MAVS      | protein_cc | chr20 | 3827487  | 3849280  | + | 4240 | 5028.788 | 0        | 0.2766   | 0.110583 | 2.501283 | 0.014015 | 0.054168 | 1 |
| ENSG0000 response | Inflamed | SLFN12    | protein_cc | chr17 | 33738079 | 33760302 | - | 3560 | 127.8831 | 0.004773 | -0.55284 | 0.221051 | -2.50097 | 0.014026 | 0.0542   | 1 |
| ENSG0000 response | Inflamed | GZMK      | protein_cc | chr5  | 54320081 | 54330398 | + | 1570 | 154.8019 | 0        | -0.5107  | 0.204203 | -2.50095 | 0.014027 | 0.0542   | 1 |
| ENSG0000 response | Inflamed | C17orf97  | protein_cc | chr17 | 260118   | 273510   | + | 2505 | 256.0883 | 0        | 0.291717 | 0.116649 | 2.500817 | 0.014032 | 0.054211 | 1 |
| ENSG0000 response | Inflamed | HIP1R     | protein_cc | chr12 | 1.23E+08 | 1.23E+08 | + | 7102 | 3579.212 | 0        | 0.279265 | 0.111676 | 2.500678 | 0.014037 | 0.054223 | 1 |
| ENSG0000 response | Inflamed | SCARNA18  | snoRNA     | chr18 | 47340731 | 47340813 | + | 83   | 1.980907 | 0.47494  | 0.266386 | 0.106528 | 2.500615 | 0.01404  | 0.054224 | 1 |
| ENSG0000 response | Inflamed | AOAH      | protein_cc | chr7  | 36552456 | 36764154 | - | 3609 | 924.3747 | 0        | -0.25459 | 0.101841 | -2.49991 | 0.014066 | 0.054318 | 1 |
| ENSG0000 response | Inflamed | TFPT      | protein_cc | chr19 | 54610320 | 54619055 | - | 1240 | 400.5728 | 0        | -0.16398 | 0.065597 | -2.49977 | 0.014071 | 0.05433  | 1 |
| ENSG0000 response | Inflamed | HPX       | protein_cc | chr11 | 6452279  | 6463847  | - | 3631 | 58.3031  | 0.00716  | 0.508448 | 0.203403 | 2.499707 | 0.014074 | 0.054331 | 1 |
| ENSG0000 response | Inflamed | ADAMTS1   | antisense  | chr5  | 1.29E+08 | 1.29E+08 | - | 786  | 1.377088 | 0.656325 | 0.263683 | 0.105491 | 2.499585 | 0.014078 | 0.05434  | 1 |
| ENSG0000 response | Inflamed | FAM32A    | protein_cc | chr19 | 16296191 | 16302857 | + | 1921 | 2593.516 | 0        | 0.163658 | 0.065476 | 2.499511 | 0.014081 | 0.054343 | 1 |
| ENSG0000 response | Inflamed | RP11-550A | antisense  | chr8  | 1.26E+08 | 1.26E+08 | - | 722  | 2.601432 | 0.494033 | 0.430941 | 0.172442 | 2.499044 | 0.014098 | 0.054402 | 1 |
| ENSG0000 response | Inflamed | WDYHV1    | protein_cc | chr8  | 1.24E+08 | 1.24E+08 | + | 2132 | 186.7804 | 0        | -0.18823 | 0.075325 | -2.49895 | 0.014102 | 0.054408 | 1 |
| ENSG0000 response | Inflamed | RP5-821D  | antisense  | chr22 | 42227219 | 42230669 | - | 2989 | 5.494033 | 0.119332 | 0.31067  | 0.124365 | 2.498056 | 0.014135 | 0.054529 | 1 |
| ENSG0000 response | Inflamed | BIRC3     | protein_cc | chr11 | 1.02E+08 | 1.02E+08 | + | 7484 | 2899.189 | 0        | -0.66226 | 0.265181 | -2.49739 | 0.01416  | 0.054617 | 1 |
| ENSG0000 response | Inflamed | ARV1      | protein_cc | chr1  | 2.31E+08 | 2.31E+08 | + | 1987 | 563.3842 | 0        | 0.271297 | 0.108639 | 2.497232 | 0.014166 | 0.054632 | 1 |
| ENSG0000 response | Inflamed | LEFTY1    | protein_cc | chr1  | 2.26E+08 | 2.26E+08 | - | 1891 | 2390.809 | 0.002387 | 0.878841 | 0.351946 | 2.497091 | 0.014171 | 0.054645 | 1 |
| ENSG0000 response | Inflamed | NDUFA6    | protein_cc | chr22 | 42481529 | 42486959 | - | 1416 | 1734.924 | 0        | 0.262429 | 0.105117 | 2.496531 | 0.014192 | 0.054718 | 1 |
| ENSG0000 response | Inflamed | SULT1B1   | protein_cc | chr4  | 70586880 | 70653679 | - | 7356 | 6653.981 | 0        | 0.555662 | 0.222609 | 2.496132 | 0.014207 | 0.054768 | 1 |
| ENSG0000 response | Inflamed | ARHGEF38  | sense_intr | chr4  | 1.06E+08 | 1.06E+08 | + | 456  | 1.610979 | 0.603819 | 0.339487 | 0.136056 | 2.495205 | 0.014242 | 0.054894 | 1 |
| ENSG0000 response | Inflamed | MRAP2     | protein_cc | chr6  | 84743475 | 84800600 | + | 2153 | 475.9952 | 0        | 0.507725 | 0.203496 | 2.495008 | 0.01425  | 0.054915 | 1 |
| ENSG0000 response | Inflamed | ZNF20     | protein_cc | chr19 | 12203658 | 12251222 | - | 4148 | 16.1599  | 0.00716  | 0.290604 | 0.116482 | 2.494841 | 0.014256 | 0.054931 | 1 |
| ENSG0000 response | Inflamed | PSMD9     | protein_cc | chr12 | 1.22E+08 | 1.22E+08 | + | 8778 | 416.4821 | 0        | -0.11297 | 0.045292 | -2.49418 | 0.014281 | 0.055018 | 1 |
| ENSG0000 response | Inflamed | RNF39     | protein_cc | chr6  | 30038043 | 30043664 | - | 2206 | 94.31504 | 0.004773 | 0.60654  | 0.243288 | 2.493096 | 0.014322 | 0.055165 | 1 |
| ENSG0000 response | Inflamed | CTD-2083f | sense_ove  | chr5  | 195893   | 196456   | + | 564  | 2.859189 | 0.369928 | -0.40457 | 0.16228  | -2.49307 | 0.014323 | 0.055165 | 1 |
| ENSG0000 response | Inflamed | SBDS      | protein_cc | chr7  | 66452664 | 66460588 | - | 1732 | 3000.136 | 0        | 0.268614 | 0.107756 | 2.492789 | 0.014334 | 0.055198 | 1 |
| ENSG0000 response | Inflamed | STEAP2    | protein_cc | chr7  | 89796904 | 89867451 | + | 8715 | 821.6659 | 0        | -0.49591 | 0.198947 | -2.4927  | 0.014337 | 0.055202 | 1 |
| ENSG0000 response | Inflamed | COLEC10   | protein_cc | chr8  | 1.2E+08  | 1.2E+08  | + | 1670 | 13.48687 | 0.140811 | -0.64012 | 0.256813 | -2.49254 | 0.014343 | 0.055218 | 1 |
| ENSG0000 response | Inflamed | RRP1      | protein_cc | chr21 | 45209394 | 45225174 | + | 4251 | 841.1718 | 0        | -0.20654 | 0.082879 | -2.492   | 0.014364 | 0.055289 | 1 |
| ENSG0000 response | Inflamed | RP11-15B1 | antisense  | chr4  | 1.01E+08 | 1.01E+08 | + | 1714 | 1.367542 | 0.682578 | -0.30974 | 0.1243   | -2.49191 | 0.014367 | 0.055293 | 1 |
| ENSG0000 response | Inflamed | BNIP3P1   | pseudoger  | chr14 | 28733596 | 28735180 | + | 1585 | 0.952267 | 0.787589 | -0.25355 | 0.101754 | -2.49178 | 0.014372 | 0.055305 | 1 |
| ENSG0000 response | Inflamed | AK2       | protein_cc | chr1  | 33473585 | 33546597 | - | 5683 | 4018.243 | 0        | 0.206934 | 0.08305  | 2.491681 | 0.014376 | 0.055311 | 1 |

|                   |          |           |                  |          |            |       |          |          |          |          |          |          |          |   |
|-------------------|----------|-----------|------------------|----------|------------|-------|----------|----------|----------|----------|----------|----------|----------|---|
| ENSG0000 response | Inflamed | RP11-756F | pseudoger chr4   | 1.9E+08  | 1.9E+08 +  | 1143  | 10.5537  | 0.057279 | 0.374778 | 0.150439 | 2.491232 | 0.014393 | 0.055369 | 1 |
| ENSG0000 response | Inflamed | DSC2      | protein_cc chr18 | 28645940 | 28682378 - | 5237  | 7929.177 | 0        | 0.507473 | 0.203712 | 2.491127 | 0.014397 | 0.055376 | 1 |
| ENSG0000 response | Inflamed | CC2D2B    | protein_cc chr10 | 97733786 | 97792441 + | 3534  | 2.042959 | 0.520286 | -0.35189 | 0.141263 | -2.49103 | 0.0144   | 0.055381 | 1 |
| ENSG0000 response | Inflamed | RP11-226L | pseudoger chr1   | 1.6E+08  | 1.6E+08 +  | 428   | 1.190931 | 0.775656 | 0.249123 | 0.100031 | 2.490447 | 0.014423 | 0.055459 | 1 |
| ENSG0000 response | Inflamed | RP3-476K8 | pseudoger chr1   | 26781144 | 26781678 - | 535   | 1.852029 | 0.501193 | 0.305739 | 0.122792 | 2.489905 | 0.014444 | 0.055531 | 1 |
| ENSG0000 response | Inflamed | TGFB11    | protein_cc chr16 | 31482906 | 31489281 + | 5403  | 1360.317 | 0        | -0.40223 | 0.16155  | -2.48979 | 0.014448 | 0.055539 | 1 |
| ENSG0000 response | Inflamed | MS4A12    | protein_cc chr11 | 60260251 | 60274903 + | 1839  | 4291.945 | 0.004773 | 1.14267  | 0.458959 | 2.489701 | 0.014451 | 0.055544 | 1 |
| ENSG0000 response | Inflamed | RP11-316M | antisense chr10  | 1.02E+08 | 1.02E+08 + | 846   | 0.763723 | 0.789976 | 0.210663 | 0.084646 | 2.488766 | 0.014487 | 0.055674 | 1 |
| ENSG0000 response | Inflamed | MIR608    | miRNA chr10      | 1.03E+08 | 1.03E+08 + | 100   | 1.307876 | 0.656325 | 0.273322 | 0.109825 | 2.488711 | 0.014489 | 0.055674 | 1 |
| ENSG0000 response | Inflamed | RP11-797A | sense_intr chr15 | 77359996 | 77360667 - | 672   | 20.96659 | 0.033413 | 0.587015 | 0.235957 | 2.487799 | 0.014524 | 0.0558   | 1 |
| ENSG0000 response | Inflamed | AC005077  | pseudoger chr7   | 75700787 | 75704281 - | 3495  | 237.8425 | 0.009547 | 0.513752 | 0.206524 | 2.487609 | 0.014531 | 0.05582  | 1 |
| ENSG0000 response | Inflamed | RP11-433C | pseudoger chr4   | 1.82E+08 | 1.82E+08 + | 342   | 44.90692 | 0.01432  | 0.503257 | 0.202321 | 2.487417 | 0.014539 | 0.05584  | 1 |
| ENSG0000 response | Inflamed | RP11-303C | pseudoger chr8   | 12437796 | 12438572 + | 186   | 9.589499 | 0.107399 | 0.479791 | 0.192912 | 2.487098 | 0.014551 | 0.055879 | 1 |
| ENSG0000 response | Inflamed | MRPL12    | protein_cc chr17 | 79670387 | 79674556 + | 1028  | 716.2196 | 0        | 0.244296 | 0.098232 | 2.486941 | 0.014557 | 0.055894 | 1 |
| ENSG0000 response | Inflamed | CNKS3R3   | protein_cc chr6  | 1.55E+08 | 1.55E+08 - | 21564 | 912.8568 | 0        | 0.396181 | 0.159342 | 2.486351 | 0.01458  | 0.055973 | 1 |
| ENSG0000 response | Inflamed | BAALC     | protein_cc chr8  | 1.04E+08 | 1.04E+08 + | 3997  | 55.89976 | 0        | -0.39931 | 0.160606 | -2.48628 | 0.014582 | 0.055975 | 1 |
| ENSG0000 response | Inflamed | NAP1L6    | protein_cc chrX  | 72345876 | 72347919 - | 2044  | 1.921241 | 0.682578 | 0.351146 | 0.141247 | 2.486041 | 0.014592 | 0.055995 | 1 |
| ENSG0000 response | Inflamed | IQSEC3    | protein_cc chr12 | 175931   | 287626 +   | 7686  | 91.10024 | 0.016706 | -0.51248 | 0.206145 | -2.48604 | 0.014592 | 0.055995 | 1 |
| ENSG0000 response | Inflamed | RP11-797B | antisense chr7   | 64348905 | 64350478 - | 1062  | 7.980907 | 0.171838 | 0.433342 | 0.174345 | 2.485547 | 0.014611 | 0.056059 | 1 |
| ENSG0000 response | Inflamed | ECSIT     | protein_cc chr19 | 11616731 | 11639989 - | 2370  | 1485.778 | 0        | 0.221824 | 0.089252 | 2.485379 | 0.014617 | 0.056076 | 1 |
| ENSG0000 response | Inflamed | LRR37A1   | pseudoger chr17  | 37183530 | 37209458 + | 5646  | 5.622912 | 0.143198 | -0.35575 | 0.143143 | -2.4853  | 0.01462  | 0.05608  | 1 |
| ENSG0000 response | Inflamed | THAP7     | protein_cc chr22 | 21353393 | 21356485 - | 2879  | 710.5728 | 0        | -0.20529 | 0.082605 | -2.48515 | 0.014626 | 0.056086 | 1 |
| ENSG0000 response | Inflamed | PSD2      | protein_cc chr5  | 1.39E+08 | 1.39E+08 + | 4513  | 8.553699 | 0.119332 | -0.44218 | 0.177929 | -2.48514 | 0.014626 | 0.056086 | 1 |
| ENSG0000 response | Inflamed | TMC2      | protein_cc chr20 | 2517253  | 2622430 +  | 4826  | 4.190931 | 0.267303 | 0.39804  | 0.16022  | 2.484327 | 0.014658 | 0.056199 | 1 |
| ENSG0000 response | Inflamed | THAP4     | protein_cc chr2  | 2.43E+08 | 2.43E+08 - | 3147  | 2223.232 | 0        | 0.152441 | 0.061371 | 2.483911 | 0.014674 | 0.056253 | 1 |
| ENSG0000 response | Inflamed | UBAC2     | protein_cc chr13 | 99853028 | 1E+08 +    | 4519  | 2418.136 | 0        | 0.13809  | 0.055602 | 2.483522 | 0.014689 | 0.056302 | 1 |
| ENSG0000 response | Inflamed | TBRG4     | protein_cc chr7  | 45139699 | 45151646 - | 5803  | 2933.759 | 0        | 0.154329 | 0.062147 | 2.483295 | 0.014698 | 0.056328 | 1 |
| ENSG0000 response | Inflamed | RP11-297M | lincRNA chr16    | 9847272  | 9851895 -  | 4624  | 12.01909 | 0.157518 | 0.564313 | 0.227278 | 2.482916 | 0.014713 | 0.056376 | 1 |
| ENSG0000 response | Inflamed | AL122127  | miRNA chr14      | 1.06E+08 | 1.06E+08 - | 60    | 19.98807 | 0.085919 | -0.66139 | 0.266405 | -2.48267 | 0.014722 | 0.056397 | 1 |
| ENSG0000 response | Inflamed | GBP6      | protein_cc chr1  | 89829617 | 89852020 + | 2987  | 4.591885 | 0.491647 | -0.57979 | 0.233537 | -2.48266 | 0.014722 | 0.056397 | 1 |
| ENSG0000 response | Inflamed | PARP2     | protein_cc chr14 | 20811741 | 20826064 + | 4096  | 518.4558 | 0        | -0.31472 | 0.126777 | -2.48246 | 0.01473  | 0.056412 | 1 |
| ENSG0000 response | Inflamed | MPL       | protein_cc chr1  | 43803478 | 43818443 + | 2128  | 5.243437 | 0.136038 | 0.345231 | 0.139071 | 2.482415 | 0.014732 | 0.056412 | 1 |
| ENSG0000 response | Inflamed | PAR6G     | protein_cc chr18 | 77915115 | 78005429 - | 4224  | 142.6062 | 0        | -0.37929 | 0.152793 | -2.4824  | 0.014733 | 0.056412 | 1 |
| ENSG0000 response | Inflamed | SEMA4C    | protein_cc chr2  | 97525453 | 97536494 - | 6157  | 1514.592 | 0        | -0.41397 | 0.166766 | -2.48233 | 0.014735 | 0.056414 | 1 |
| ENSG0000 response | Inflamed | C12orf61  | protein_cc chr12 | 62995531 | 62997214 - | 1684  | 24.07876 | 0.002387 | -0.37662 | 0.151729 | -2.48219 | 0.014741 | 0.056426 | 1 |
| ENSG0000 response | Inflamed | PLS3      | protein_cc chrX  | 1.15E+08 | 1.15E+08 + | 4138  | 1167.169 | 0        | -0.43665 | 0.175924 | -2.48206 | 0.014746 | 0.056438 | 1 |
| ENSG0000 response | Inflamed | CCNI      | protein_cc chr4  | 77968311 | 77997158 - | 3741  | 9771.36  | 0        | -0.18688 | 0.075304 | -2.48163 | 0.014762 | 0.056493 | 1 |
| ENSG0000 response | Inflamed | CTD-3224I | lincRNA chr5     | 1.39E+08 | 1.39E+08 - | 543   | 2.217184 | 0.541766 | -0.33166 | 0.133666 | -2.48126 | 0.014777 | 0.05654  | 1 |
| ENSG0000 response | Inflamed | LIPC      | protein_cc chr15 | 58702768 | 58861151 + | 4293  | 50.89737 | 0.002387 | 0.514986 | 0.207556 | 2.481196 | 0.01478  | 0.056542 | 1 |
| ENSG0000 response | Inflamed | RP11-104J | lincRNA chr17    | 34339544 | 34339931 + | 388   | 1.367542 | 0.642005 | 0.277036 | 0.111664 | 2.480985 | 0.014788 | 0.056558 | 1 |

|                   |          |           |                  |          |          |   |      |          |          |          |          |          |          |          |   |
|-------------------|----------|-----------|------------------|----------|----------|---|------|----------|----------|----------|----------|----------|----------|----------|---|
| ENSG0000 response | Inflamed | PROC      | protein_cc chr2  | 1.28E+08 | 1.28E+08 | + | 2495 | 32.54415 | 0.011933 | 0.454483 | 0.183187 | 2.480975 | 0.014788 | 0.056558 | 1 |
| ENSG0000 response | Inflamed | NT5C1A    | protein_cc chr1  | 40124793 | 40137710 | - | 1107 | 1.069212 | 0.73747  | -0.28977 | 0.116804 | -2.48084 | 0.014794 | 0.05657  | 1 |
| ENSG0000 response | Inflamed | USF2      | protein_cc chr19 | 35759881 | 35770724 | + | 4952 | 3934.58  | 0        | -0.18105 | 0.072984 | -2.48073 | 0.014798 | 0.056576 | 1 |
| ENSG0000 response | Inflamed | CTXN1     | protein_cc chr19 | 7989372  | 7991051  | - | 1272 | 41.04773 | 0.011933 | -0.43242 | 0.174312 | -2.48069 | 0.014799 | 0.056576 | 1 |
| ENSG0000 response | Inflamed | DTNBP1    | protein_cc chr6  | 15523032 | 15663289 | - | 3078 | 532.1933 | 0        | -0.13373 | 0.053912 | -2.48045 | 0.014809 | 0.056604 | 1 |
| ENSG0000 response | Inflamed | INSL5     | protein_cc chr1  | 67263424 | 67266939 | - | 715  | 441.7613 | 0.076372 | 1.422966 | 0.573799 | 2.479902 | 0.01483  | 0.056677 | 1 |
| ENSG0000 response | Inflamed | RP11-505E | antisense chr15  | 1.02E+08 | 1.02E+08 | - | 491  | 1.081146 | 0.708831 | -0.28052 | 0.113129 | -2.47963 | 0.014841 | 0.056707 | 1 |
| ENSG0000 response | Inflamed | BSCL2     | protein_cc chr11 | 62457747 | 62477317 | - | 4004 | 297.9761 | 0        | -0.18014 | 0.072652 | -2.47954 | 0.014844 | 0.056707 | 1 |
| ENSG0000 response | Inflamed | GNPTG     | protein_cc chr16 | 1401924  | 1413352  | + | 3672 | 1948.745 | 0        | -0.1562  | 0.062997 | -2.47953 | 0.014844 | 0.056707 | 1 |
| ENSG0000 response | Inflamed | ASPHD2    | protein_cc chr22 | 26825239 | 26840981 | + | 3357 | 627.463  | 0        | -0.28568 | 0.115218 | -2.47943 | 0.014849 | 0.056715 | 1 |
| ENSG0000 response | Inflamed | HOXD8     | protein_cc chr2  | 1.77E+08 | 1.77E+08 | + | 2629 | 191.5967 | 0        | -0.33539 | 0.135307 | -2.47871 | 0.014877 | 0.056814 | 1 |
| ENSG0000 response | Inflamed | PTPRVP    | pseudoger chr1   | 2.02E+08 | 2.02E+08 | + | 6596 | 34.27446 | 0.050119 | -0.64298 | 0.259426 | -2.47848 | 0.014886 | 0.05684  | 1 |
| ENSG0000 response | Inflamed | FLRT2     | protein_cc chr14 | 85996488 | 86095034 | + | 9163 | 403.7255 | 0.00716  | -0.69617 | 0.280893 | -2.47843 | 0.014888 | 0.05684  | 1 |
| ENSG0000 response | Inflamed | RIMBP3C   | protein_cc chr22 | 21899646 | 21905750 | - | 6105 | 2.326969 | 0.439141 | -0.3084  | 0.124448 | -2.47814 | 0.014899 | 0.056875 | 1 |
| ENSG0000 response | Inflamed | C1DP1     | pseudoger chr10  | 32800264 | 32800665 | - | 402  | 4.954654 | 0.386635 | 0.406184 | 0.163911 | 2.478071 | 0.014902 | 0.056877 | 1 |
| ENSG0000 response | Inflamed | PTGR2     | protein_cc chr14 | 74318547 | 74353530 | + | 8072 | 212.6492 | 0        | 0.418401 | 0.168855 | 2.477879 | 0.014909 | 0.056897 | 1 |
| ENSG0000 response | Inflamed | RP11-750E | pseudoger chr17  | 51183095 | 51183719 | + | 625  | 521.2005 | 0        | 0.37233  | 0.150308 | 2.477124 | 0.014939 | 0.057002 | 1 |
| ENSG0000 response | Inflamed | ARHGAP24  | protein_cc chr4  | 86396267 | 86923823 | + | 7908 | 244.3079 | 0.002387 | -0.42631 | 0.172104 | -2.47705 | 0.014942 | 0.057006 | 1 |
| ENSG0000 response | Inflamed | COMMD5    | protein_cc chr8  | 1.46E+08 | 1.46E+08 | - | 2909 | 559.4821 | 0        | -0.16371 | 0.066104 | -2.47656 | 0.014961 | 0.057071 | 1 |
| ENSG0000 response | Inflamed | ZBTB7A    | protein_cc chr19 | 4044362  | 4066943  | - | 5725 | 6053.045 | 0        | 0.276788 | 0.111767 | 2.476482 | 0.014964 | 0.057074 | 1 |
| ENSG0000 response | Inflamed | LINC00955 | protein_cc chr4  | 3578596  | 3592438  | + | 2087 | 29.01193 | 0.453461 | 0.814049 | 0.328736 | 2.476302 | 0.014971 | 0.057093 | 1 |
| ENSG0000 response | Inflamed | RP11-75L1 | lincRNA chr12    | 9856673  | 9861946  | + | 560  | 1.417661 | 0.687351 | -0.32772 | 0.132362 | -2.47591 | 0.014987 | 0.057143 | 1 |
| ENSG0000 response | Inflamed | DEPDC7    | protein_cc chr11 | 33037410 | 33055128 | + | 3326 | 159.8735 | 0        | 0.468752 | 0.189331 | 2.475829 | 0.01499  | 0.057147 | 1 |
| ENSG0000 response | Inflamed | RP11-175F | antisense chr12  | 1.01E+08 | 1.01E+08 | + | 418  | 4.673031 | 0.193317 | 0.379649 | 0.153358 | 2.475575 | 0.015    | 0.057177 | 1 |
| ENSG0000 response | Inflamed | FAM72C    | protein_cc chr1  | 1.49E+08 | 1.49E+08 | - | 1512 | 5.307876 | 0.183771 | -0.39229 | 0.158476 | -2.47537 | 0.015008 | 0.057199 | 1 |
| ENSG0000 response | Inflamed | WNT6      | protein_cc chr2  | 2.2E+08  | 2.2E+08  | + | 1703 | 23.59666 | 0.009547 | -0.4819  | 0.194731 | -2.47467 | 0.015036 | 0.057289 | 1 |
| ENSG0000 response | Inflamed | EDEM1     | protein_cc chr3  | 5229331  | 5261642  | + | 6758 | 5317.931 | 0        | -0.39135 | 0.158144 | -2.47467 | 0.015036 | 0.057289 | 1 |
| ENSG0000 response | Inflamed | NDUFA12   | protein_cc chr12 | 95290831 | 95397546 | - | 1815 | 1289.687 | 0        | 0.264514 | 0.106895 | 2.474509 | 0.015042 | 0.057305 | 1 |
| ENSG0000 response | Inflamed | RPS24     | protein_cc chr10 | 79793518 | 79816570 | + | 4880 | 16439.04 | 0        | 0.305346 | 0.12341  | 2.474246 | 0.015053 | 0.057336 | 1 |
| ENSG0000 response | Inflamed | CA4       | protein_cc chr17 | 58227297 | 58248260 | + | 2424 | 10571.17 | 0        | 0.851209 | 0.34405  | 2.474085 | 0.015059 | 0.057352 | 1 |
| ENSG0000 response | Inflamed | RP11-789C | lincRNA chr4     | 1.71E+08 | 1.71E+08 | + | 469  | 17.23628 | 0.105012 | 0.5526   | 0.223365 | 2.473979 | 0.015063 | 0.05736  | 1 |
| ENSG0000 response | Inflamed | GORASP1   | protein_cc chr3  | 39138150 | 39149854 | - | 6256 | 3686.644 | 0        | 0.199248 | 0.08054  | 2.473908 | 0.015066 | 0.057362 | 1 |
| ENSG0000 response | Inflamed | UGT1A10   | protein_cc chr2  | 2.35E+08 | 2.35E+08 | + | 3157 | 868.2053 | 0.009547 | 0.856007 | 0.346027 | 2.473813 | 0.01507  | 0.057368 | 1 |
| ENSG0000 response | Inflamed | DPEP1     | protein_cc chr16 | 89679716 | 89704839 | + | 2712 | 717.9499 | 0        | -0.69494 | 0.280937 | -2.47367 | 0.015076 | 0.057382 | 1 |
| ENSG0000 response | Inflamed | RP11-229F | processed_chr9   | 1.4E+08  | 1.4E+08  | + | 686  | 3.095465 | 0.470167 | -0.43437 | 0.175639 | -2.47307 | 0.015099 | 0.057465 | 1 |
| ENSG0000 response | Inflamed | FOXO4     | protein_cc chrX  | 70316047 | 70323385 | + | 3447 | 1602.907 | 0        | 0.266808 | 0.10789  | 2.472958 | 0.015104 | 0.057472 | 1 |
| ENSG0000 response | Inflamed | GABRQ     | protein_cc chrX  | 1.52E+08 | 1.52E+08 | + | 6174 | 4.422434 | 0.286396 | -0.42455 | 0.171689 | -2.4728  | 0.01511  | 0.057488 | 1 |
| ENSG0000 response | Inflamed | PIGU      | protein_cc chr20 | 33148346 | 33264910 | - | 2755 | 795.5012 | 0        | 0.19256  | 0.077904 | 2.47175  | 0.015152 | 0.057639 | 1 |
| ENSG0000 response | Inflamed | ACBD6     | protein_cc chr1  | 1.8E+08  | 1.8E+08  | - | 2356 | 517.6659 | 0        | -0.16344 | 0.066129 | -2.47147 | 0.015163 | 0.057668 | 1 |
| ENSG0000 response | Inflamed | NDUFAF4F  | pseudoger chr3   | 37831412 | 37831936 | - | 525  | 5.298329 | 0.245823 | 0.401401 | 0.162415 | 2.471449 | 0.015164 | 0.057668 | 1 |

|                   |          |           |                  |          |            |       |          |          |          |          |          |          |          |   |
|-------------------|----------|-----------|------------------|----------|------------|-------|----------|----------|----------|----------|----------|----------|----------|---|
| ENSG0000 response | Inflamed | MGST3     | protein_cc chr1  | 1.66E+08 | 1.66E+08 + | 7888  | 3467.916 | 0        | 0.281057 | 0.113738 | 2.47108  | 0.015179 | 0.057715 | 1 |
| ENSG0000 response | Inflamed | RP11-1275 | lincRNA chr7     | 5465908  | 5468558 -  | 2651  | 16.12411 | 0.01432  | 0.378297 | 0.153103 | 2.47087  | 0.015187 | 0.057739 | 1 |
| ENSG0000 response | Inflamed | LOXL3     | protein_cc chr2  | 74759541 | 74782817 - | 4363  | 384.0907 | 0        | -0.39562 | 0.160142 | -2.47043 | 0.015205 | 0.057798 | 1 |
| ENSG0000 response | Inflamed | DLX4      | protein_cc chr17 | 48046334 | 48052321 + | 3211  | 7.572792 | 0.105012 | -0.39973 | 0.161818 | -2.47027 | 0.015211 | 0.057813 | 1 |
| ENSG0000 response | Inflamed | AC007405  | lincRNA chr2     | 1.72E+08 | 1.72E+08 - | 2026  | 2.183771 | 0.49642  | 0.310374 | 0.125663 | 2.469887 | 0.015226 | 0.057863 | 1 |
| ENSG0000 response | Inflamed | ASS1P1    | pseudoger chr6   | 25023475 | 25024711 - | 1237  | 4.50358  | 0.231504 | -0.38202 | 0.1547   | -2.46946 | 0.015243 | 0.05792  | 1 |
| ENSG0000 response | Inflamed | GSE1      | protein_cc chr16 | 85645015 | 85709810 + | 10173 | 4540.8   | 0        | 0.312838 | 0.126692 | 2.469277 | 0.015251 | 0.057938 | 1 |
| ENSG0000 response | Inflamed | PDIA5     | protein_cc chr3  | 1.23E+08 | 1.23E+08 + | 4030  | 1562.704 | 0        | -0.18375 | 0.074417 | -2.46923 | 0.015253 | 0.057938 | 1 |
| ENSG0000 response | Inflamed | RP11-4461 | lincRNA chr12    | 46931285 | 47046333 + | 448   | 11.58234 | 0.00716  | -0.3327  | 0.134745 | -2.46909 | 0.015258 | 0.057942 | 1 |
| ENSG0000 response | Inflamed | PSME2P2   | pseudoger chr13  | 49345264 | 49345965 + | 702   | 88.68258 | 0        | -0.2696  | 0.109191 | -2.46905 | 0.01526  | 0.057942 | 1 |
| ENSG0000 response | Inflamed | NIPSNAP1  | protein_cc chr22 | 29950797 | 29977326 - | 3067  | 1835.308 | 0        | 0.213349 | 0.086411 | 2.468992 | 0.015262 | 0.057942 | 1 |
| ENSG0000 response | Inflamed | RP11-9821 | lincRNA chr14    | 1.05E+08 | 1.05E+08 - | 3816  | 10.46778 | 0.145585 | 0.529324 | 0.214389 | 2.468984 | 0.015262 | 0.057942 | 1 |
| ENSG0000 response | Inflamed | BCL2L12   | protein_cc chr19 | 50168823 | 50177173 + | 1743  | 494.8496 | 0        | -0.23071 | 0.09345  | -2.46875 | 0.015272 | 0.05797  | 1 |
| ENSG0000 response | Inflamed | DGCR2     | protein_cc chr22 | 19023795 | 19109967 - | 5596  | 7256.582 | 0        | 0.273279 | 0.110702 | 2.468604 | 0.015278 | 0.057983 | 1 |
| ENSG0000 response | Inflamed | GATS      | pseudoger chr7   | 99798276 | 99869837 - | 4824  | 148.8162 | 0.002387 | -0.29409 | 0.119138 | -2.46852 | 0.015281 | 0.057988 | 1 |
| ENSG0000 response | Inflamed | TCERG1L   | protein_cc chr10 | 1.33E+08 | 1.33E+08 - | 5258  | 3.214797 | 0.470167 | -0.48761 | 0.197555 | -2.46822 | 0.015293 | 0.058025 | 1 |
| ENSG0000 response | Inflamed | RABAC1    | protein_cc chr19 | 42460833 | 42463542 - | 1999  | 2467.036 | 0        | -0.2697  | 0.109277 | -2.46808 | 0.015299 | 0.058037 | 1 |
| ENSG0000 response | Inflamed | KCNJ3     | protein_cc chr2  | 1.56E+08 | 1.56E+08 + | 5066  | 60.63962 | 0.02864  | 0.789361 | 0.319861 | 2.467822 | 0.015309 | 0.058069 | 1 |
| ENSG0000 response | Inflamed | HOXB-AS4  | antisense chr17  | 46706037 | 46712294 + | 669   | 5.164678 | 0.190931 | 0.353579 | 0.143297 | 2.467458 | 0.015324 | 0.058116 | 1 |
| ENSG0000 response | Inflamed | AMIGO2    | protein_cc chr12 | 47469490 | 47473734 - | 3956  | 220.9284 | 0        | -0.39918 | 0.161786 | -2.4673  | 0.01533  | 0.058132 | 1 |
| ENSG0000 response | Inflamed | TRAV9-2   | TR_V_gen chr14   | 22409313 | 22409848 + | 394   | 16.80907 | 0.045346 | -0.46269 | 0.187554 | -2.46696 | 0.015344 | 0.058176 | 1 |
| ENSG0000 response | Inflamed | MRRFP1    | pseudoger chrX   | 1.22E+08 | 1.22E+08 - | 1675  | 1.095465 | 0.706444 | 0.253537 | 0.102782 | 2.466743 | 0.015353 | 0.0582   | 1 |
| ENSG0000 response | Inflamed | RP11-428J | lincRNA chr6     | 5031990  | 5054657 -  | 3273  | 6.73747  | 0.128878 | -0.43105 | 0.174748 | -2.46668 | 0.015355 | 0.058202 | 1 |
| ENSG0000 response | Inflamed | SMIM2-AS  | antisense chr13  | 44716682 | 44813010 + | 546   | 79.93556 | 0.009547 | 0.568088 | 0.230321 | 2.466502 | 0.015362 | 0.05822  | 1 |
| ENSG0000 response | Inflamed | HIST1H2B1 | protein_cc chr6  | 27106073 | 27114619 - | 820   | 1348.897 | 0        | -0.24712 | 0.100202 | -2.46621 | 0.015374 | 0.058244 | 1 |
| ENSG0000 response | Inflamed | ARL10     | protein_cc chr5  | 1.76E+08 | 1.76E+08 + | 11459 | 322.8019 | 0.002387 | -0.56705 | 0.229928 | -2.4662  | 0.015374 | 0.058244 | 1 |
| ENSG0000 response | Inflamed | LINC00426 | lincRNA chr13    | 30914407 | 30951282 - | 3972  | 109.5274 | 0.002387 | -0.48794 | 0.197853 | -2.46616 | 0.015376 | 0.058244 | 1 |
| ENSG0000 response | Inflamed | NIT1      | protein_cc chr1  | 1.61E+08 | 1.61E+08 + | 3793  | 1658.341 | 0        | 0.129705 | 0.052595 | 2.46613  | 0.015377 | 0.058244 | 1 |
| ENSG0000 response | Inflamed | CTC-338M  | antisense chr5   | 1.81E+08 | 1.81E+08 + | 486   | 16.45585 | 0.00716  | 0.350735 | 0.142242 | 2.465755 | 0.015392 | 0.058293 | 1 |
| ENSG0000 response | Inflamed | PRKRIP1   | protein_cc chr7  | 1.02E+08 | 1.02E+08 + | 3696  | 751.3484 | 0        | -0.19715 | 0.07996  | -2.46565 | 0.015397 | 0.058301 | 1 |
| ENSG0000 response | Inflamed | ALOX12P2  | pseudoger chr17  | 6757180  | 6857426 +  | 5655  | 14.01909 | 0.140811 | -0.62832 | 0.254834 | -2.46559 | 0.015399 | 0.058301 | 1 |
| ENSG0000 response | Inflamed | RP1-276N1 | lincRNA chr6     | 1.61E+08 | 1.61E+08 + | 467   | 3.520286 | 0.558473 | -0.59461 | 0.241204 | -2.46519 | 0.015415 | 0.058354 | 1 |
| ENSG0000 response | Inflamed | AC021188  | antisense chr2   | 96973001 | 96987469 - | 740   | 10.35084 | 0.0358   | -0.36469 | 0.147951 | -2.46494 | 0.015426 | 0.058384 | 1 |
| ENSG0000 response | Inflamed | PCDHGA11  | protein_cc chr5  | 1.41E+08 | 1.41E+08 + | 4747  | 68.73508 | 0.033413 | -0.58347 | 0.236717 | -2.46486 | 0.015429 | 0.058388 | 1 |
| ENSG0000 response | Inflamed | AC114730  | antisense chr2   | 2.43E+08 | 2.43E+08 - | 2250  | 10.09547 | 0.164678 | 0.460381 | 0.186805 | 2.464503 | 0.015443 | 0.05843  | 1 |
| ENSG0000 response | Inflamed | AC009299  | pseudoger chr2   | 1.62E+08 | 1.62E+08 - | 513   | 3.945107 | 0.25537  | -0.38313 | 0.155463 | -2.46447 | 0.015444 | 0.05843  | 1 |
| ENSG0000 response | Inflamed | SCG3      | protein_cc chr15 | 51973550 | 52013223 + | 3310  | 31.24105 | 0.016706 | 0.470327 | 0.190847 | 2.46442  | 0.015446 | 0.05843  | 1 |
| ENSG0000 response | Inflamed | SLC26A1   | protein_cc chr4  | 972861   | 987228 -   | 4293  | 49.53699 | 0.004773 | 0.411575 | 0.167015 | 2.464294 | 0.015452 | 0.058441 | 1 |
| ENSG0000 response | Inflamed | KRCC1     | protein_cc chr2  | 88326724 | 88355248 - | 1753  | 1297.074 | 0        | 0.338398 | 0.137325 | 2.464213 | 0.015455 | 0.058445 | 1 |
| ENSG0000 response | Inflamed | LYNX1     | protein_cc chr8  | 1.44E+08 | 1.44E+08 - | 6037  | 340.1432 | 0        | -0.55928 | 0.226971 | -2.46409 | 0.01546  | 0.058455 | 1 |

|                   |          |           |                  |          |          |   |      |          |          |          |          |          |          |          |   |
|-------------------|----------|-----------|------------------|----------|----------|---|------|----------|----------|----------|----------|----------|----------|----------|---|
| ENSG0000 response | Inflamed | LYPD3     | protein_cc chr19 | 43964939 | 43969812 | - | 2519 | 70.96659 | 0        | -0.55284 | 0.224367 | -2.464   | 0.015464 | 0.058461 | 1 |
| ENSG0000 response | Inflamed | SMKR1     | protein_cc chr7  | 1.29E+08 | 1.29E+08 | + | 1035 | 9.076372 | 0.116945 | -0.48006 | 0.194837 | -2.4639  | 0.015467 | 0.058467 | 1 |
| ENSG0000 response | Inflamed | NKAPL     | protein_cc chr6  | 28227098 | 28228736 | + | 1639 | 6.178998 | 0.107399 | -0.39934 | 0.162086 | -2.46378 | 0.015472 | 0.058477 | 1 |
| ENSG0000 response | Inflamed | LINC00341 | lincRNA chr14    | 95873606 | 95876427 | - | 2822 | 460.4726 | 0        | -0.3593  | 0.145847 | -2.46357 | 0.015481 | 0.058493 | 1 |
| ENSG0000 response | Inflamed | RP11-789C | lincRNA chr4     | 1.71E+08 | 1.71E+08 | + | 429  | 4.563246 | 0.501193 | 0.434346 | 0.176308 | 2.46357  | 0.015481 | 0.058493 | 1 |
| ENSG0000 response | Inflamed | P4HB      | protein_cc chr17 | 79801035 | 79818570 | - | 5303 | 50454    | 0        | -0.1902  | 0.077207 | -2.46351 | 0.015483 | 0.058493 | 1 |
| ENSG0000 response | Inflamed | CYR61     | protein_cc chr1  | 86046444 | 86049645 | + | 2455 | 1752.153 | 0        | -0.8478  | 0.344252 | -2.46272 | 0.015515 | 0.058606 | 1 |
| ENSG0000 response | Inflamed | RP11-253E | processed_chr12  | 3150603  | 3154116  | + | 3514 | 203.5203 | 0.019093 | -0.50824 | 0.206391 | -2.46249 | 0.015525 | 0.058631 | 1 |
| ENSG0000 response | Inflamed | RP11-92G  | lincRNA chr1     | 2.01E+08 | 2.01E+08 | + | 736  | 1.26253  | 0.682578 | -0.27649 | 0.112283 | -2.46245 | 0.015526 | 0.058631 | 1 |
| ENSG0000 response | Inflamed | LAMP2     | protein_cc chrX  | 1.2E+08  | 1.2E+08  | - | 5617 | 2725.888 | 0        | -0.25227 | 0.102449 | -2.46238 | 0.01553  | 0.058635 | 1 |
| ENSG0000 response | Inflamed | RP11-551L | pseudoger chr12  | 31264586 | 31359088 | - | 8118 | 99.95465 | 0.004773 | -0.61914 | 0.251449 | -2.4623  | 0.015533 | 0.058639 | 1 |
| ENSG0000 response | Inflamed | DACT2     | protein_cc chr6  | 1.69E+08 | 1.69E+08 | - | 4223 | 93.19809 | 0.026253 | 0.757851 | 0.30779  | 2.462236 | 0.015535 | 0.058639 | 1 |
| ENSG0000 response | Inflamed | C11orf82  | protein_cc chr11 | 82611017 | 82669319 | + | 5339 | 99.08115 | 0.002387 | -0.50579 | 0.205425 | -2.46218 | 0.015537 | 0.058639 | 1 |
| ENSG0000 response | Inflamed | SLC22A10  | protein_cc chr11 | 62905339 | 63137190 | + | 3207 | 2.410501 | 0.675418 | -0.43896 | 0.17829  | -2.46208 | 0.015542 | 0.058646 | 1 |
| ENSG0000 response | Inflamed | NCAPH     | protein_cc chr2  | 97001525 | 97039583 | + | 3278 | 468.5609 | 0        | -0.33684 | 0.136821 | -2.46192 | 0.015548 | 0.058663 | 1 |
| ENSG0000 response | Inflamed | MYLIP     | protein_cc chr6  | 16129356 | 16148479 | + | 3033 | 1211.89  | 0        | 0.302811 | 0.123022 | 2.461441 | 0.015568 | 0.058724 | 1 |
| ENSG0000 response | Inflamed | RP11-361L | processed_chr16  | 66976615 | 66997159 | + | 317  | 0.990453 | 0.76611  | 0.183174 | 0.074418 | 2.461414 | 0.015569 | 0.058724 | 1 |
| ENSG0000 response | Inflamed | AF064858  | lincRNA chr21    | 40400461 | 40401053 | - | 292  | 8.360382 | 0.159905 | -0.5524  | 0.224492 | -2.46066 | 0.0156   | 0.058831 | 1 |
| ENSG0000 response | Inflamed | CLDN18    | protein_cc chr3  | 1.38E+08 | 1.38E+08 | + | 3877 | 208.8162 | 0.136038 | -1.18153 | 0.480178 | -2.4606  | 0.015602 | 0.058832 | 1 |
| ENSG0000 response | Inflamed | TCFL5     | protein_cc chr20 | 61472467 | 61493115 | - | 3436 | 272.4893 | 0        | -0.22091 | 0.089784 | -2.46048 | 0.015607 | 0.058843 | 1 |
| ENSG0000 response | Inflamed | LINC00087 | lincRNA chrX     | 1.34E+08 | 1.34E+08 | - | 2696 | 40.65394 | 0.004773 | -0.39762 | 0.161622 | -2.46018 | 0.015619 | 0.058881 | 1 |
| ENSG0000 response | Inflamed | MRPS22    | protein_cc chr3  | 1.39E+08 | 1.39E+08 | + | 5382 | 769.4296 | 0        | 0.262314 | 0.106635 | 2.459933 | 0.015629 | 0.058907 | 1 |
| ENSG0000 response | Inflamed | TRIL      | processed_chr7   | 28992974 | 28997934 | - | 4961 | 6.842482 | 0.147971 | 0.438972 | 0.178454 | 2.459861 | 0.015632 | 0.058907 | 1 |
| ENSG0000 response | Inflamed | RP11-298C | lincRNA chr3     | 1.68E+08 | 1.68E+08 | + | 661  | 1.159905 | 0.735084 | -0.28595 | 0.116249 | -2.45983 | 0.015634 | 0.058907 | 1 |
| ENSG0000 response | Inflamed | RAB5CP2   | pseudoger chr5   | 90772199 | 90772835 | + | 637  | 0.868735 | 0.770883 | 0.24672  | 0.100301 | 2.45979  | 0.015635 | 0.058907 | 1 |
| ENSG0000 response | Inflamed | AF064860  | sense_ove chr21  | 41002198 | 41098012 | + | 544  | 2.673031 | 0.522673 | 0.475426 | 0.193328 | 2.459163 | 0.015661 | 0.058995 | 1 |
| ENSG0000 response | Inflamed | TSPAN2    | protein_cc chr1  | 1.16E+08 | 1.16E+08 | - | 3410 | 231.7351 | 0        | -0.44077 | 0.179271 | -2.45868 | 0.015681 | 0.059062 | 1 |
| ENSG0000 response | Inflamed | AF186192  | pseudoger chr8   | 1.46E+08 | 1.46E+08 | + | 1932 | 10.41527 | 0.081146 | 0.46088  | 0.187459 | 2.458565 | 0.015686 | 0.059066 | 1 |
| ENSG0000 response | Inflamed | C8orf58   | protein_cc chr8  | 22457114 | 22461663 | + | 3317 | 216.5203 | 0        | -0.20854 | 0.084824 | -2.45854 | 0.015686 | 0.059066 | 1 |
| ENSG0000 response | Inflamed | SLITRK6   | protein_cc chr13 | 86366925 | 86373623 | - | 4318 | 329.5012 | 0        | 0.684385 | 0.278402 | 2.458259 | 0.015698 | 0.059094 | 1 |
| ENSG0000 response | Inflamed | RNASEH2C  | protein_cc chr11 | 65482367 | 65488418 | - | 3697 | 758.9093 | 0        | -0.2398  | 0.097549 | -2.45825 | 0.015699 | 0.059094 | 1 |
| ENSG0000 response | Inflamed | LUZP2     | protein_cc chr11 | 24518516 | 25104150 | + | 8795 | 25.06921 | 0.109785 | 0.662758 | 0.269654 | 2.457811 | 0.015717 | 0.059145 | 1 |
| ENSG0000 response | Inflamed | NPDC1     | protein_cc chr9  | 1.4E+08  | 1.4E+08  | - | 2737 | 5270.809 | 0        | 0.286304 | 0.116488 | 2.457806 | 0.015717 | 0.059145 | 1 |
| ENSG0000 response | Inflamed | MITF      | protein_cc chr3  | 69788586 | 70017488 | + | 7222 | 232.4964 | 0        | -0.43168 | 0.17564  | -2.45776 | 0.015719 | 0.059145 | 1 |
| ENSG0000 response | Inflamed | MTM1      | protein_cc chrX  | 1.5E+08  | 1.5E+08  | + | 4048 | 902.1169 | 0        | 0.499096 | 0.203082 | 2.457608 | 0.015725 | 0.05916  | 1 |
| ENSG0000 response | Inflamed | IGLV3-22  | IG_V_gene chr22  | 23046750 | 23047307 | + | 409  | 14.08592 | 0.424821 | -0.73316 | 0.298368 | -2.45723 | 0.01574  | 0.059209 | 1 |
| ENSG0000 response | Inflamed | ZMAT5     | protein_cc chr22 | 30126945 | 30163000 | - | 3315 | 328.9475 | 0        | -0.22369 | 0.091046 | -2.45694 | 0.015752 | 0.059246 | 1 |
| ENSG0000 response | Inflamed | GTF2H4    | protein_cc chr6  | 30875961 | 30881883 | + | 2353 | 72.53461 | 0        | -0.20015 | 0.081463 | -2.45689 | 0.015755 | 0.059246 | 1 |
| ENSG0000 response | Inflamed | AC084809  | antisense chr17  | 31203777 | 31205655 | + | 591  | 14.36277 | 0.00716  | 0.256298 | 0.104328 | 2.45667  | 0.015764 | 0.05927  | 1 |
| ENSG0000 response | Inflamed | SLN       | protein_cc chr11 | 1.08E+08 | 1.08E+08 | - | 906  | 2.24105  | 0.756563 | -0.45847 | 0.186624 | -2.45662 | 0.015766 | 0.05927  | 1 |



|                   |          |           |                  |          |          |   |      |          |          |          |          |          |          |          |   |
|-------------------|----------|-----------|------------------|----------|----------|---|------|----------|----------|----------|----------|----------|----------|----------|---|
| ENSG0000 response | Inflamed | TMEM26    | protein_cc chr10 | 63166401 | 63213208 | - | 6907 | 118.3723 | 0.002387 | -0.46683 | 0.190032 | -2.45657 | 0.015768 | 0.05927  | 1 |
| ENSG0000 response | Inflamed | ZNF888    | lincRNA chr19    | 53418449 | 53426723 | - | 551  | 33.72792 | 0.02864  | 0.526728 | 0.214444 | 2.456253 | 0.015781 | 0.059311 | 1 |
| ENSG0000 response | Inflamed | TSEN54    | protein_cc chr17 | 73512141 | 73520820 | + | 3440 | 1006.224 | 0        | 0.179882 | 0.073244 | 2.455912 | 0.015795 | 0.059355 | 1 |
| ENSG0000 response | Inflamed | HPS1      | protein_cc chr10 | 1E+08    | 1E+08    | - | 5277 | 4439.072 | 0        | 0.167877 | 0.068359 | 2.455805 | 0.015799 | 0.059363 | 1 |
| ENSG0000 response | Inflamed | C11orf1   | protein_cc chr11 | 1.12E+08 | 1.12E+08 | + | 3831 | 289.4105 | 0        | 0.318986 | 0.129896 | 2.455692 | 0.015804 | 0.059372 | 1 |
| ENSG0000 response | Inflamed | TRBV21-1  | TR_V_pset chr7   | 1.42E+08 | 1.42E+08 | + | 348  | 3.004773 | 0.429594 | -0.34892 | 0.142112 | -2.45523 | 0.015823 | 0.059435 | 1 |
| ENSG0000 response | Inflamed | EIF4A1    | protein_cc chr17 | 7476024  | 7482323  | + | 5316 | 2430.47  | 0        | -0.21633 | 0.088119 | -2.45503 | 0.015832 | 0.059459 | 1 |
| ENSG0000 response | Inflamed | RP11-431k | lincRNA chr1     | 8086798  | 8182762  | + | 2044 | 4.429594 | 0.217184 | -0.39827 | 0.162233 | -2.4549  | 0.015837 | 0.05947  | 1 |
| ENSG0000 response | Inflamed | SAV1      | protein_cc chr14 | 51098776 | 51135049 | - | 5630 | 668.7351 | 0        | -0.35508 | 0.144644 | -2.45483 | 0.01584  | 0.059473 | 1 |
| ENSG0000 response | Inflamed | PDGFA     | protein_cc chr7  | 536895   | 559933   | - | 4151 | 1452.513 | 0        | 0.307151 | 0.125135 | 2.454564 | 0.015851 | 0.059506 | 1 |
| ENSG0000 response | Inflamed | SPDYC     | protein_cc chr11 | 64937625 | 64940715 | + | 991  | 1.625298 | 0.599045 | 0.316246 | 0.128893 | 2.45355  | 0.015893 | 0.059655 | 1 |
| ENSG0000 response | Inflamed | WDR81     | protein_cc chr17 | 1619817  | 1641893  | + | 7913 | 2610.649 | 0        | -0.28788 | 0.117362 | -2.45297 | 0.015917 | 0.059737 | 1 |
| ENSG0000 response | Inflamed | RNF112    | protein_cc chr17 | 19314438 | 19320589 | + | 3652 | 133.7088 | 0.004773 | 0.472662 | 0.192717 | 2.452617 | 0.015932 | 0.059774 | 1 |
| ENSG0000 response | Inflamed | P4HA1     | protein_cc chr10 | 74766975 | 74856732 | - | 3186 | 997.3294 | 0        | -0.40642 | 0.165712 | -2.45259 | 0.015933 | 0.059774 | 1 |
| ENSG0000 response | Inflamed | RP11-640l | antisense chr1   | 1.44E+08 | 1.45E+08 | - | 6056 | 37.11456 | 0.002387 | -0.26811 | 0.109319 | -2.45257 | 0.015934 | 0.059774 | 1 |
| ENSG0000 response | Inflamed | TMEM132   | protein_cc chr17 | 32907768 | 32966337 | + | 4583 | 14.77804 | 0.045346 | -0.44971 | 0.183393 | -2.45218 | 0.01595  | 0.059827 | 1 |
| ENSG0000 response | Inflamed | RP11-89K1 | protein_cc chr15 | 1.02E+08 | 1.02E+08 | - | 711  | 11.71838 | 0.042959 | -0.43176 | 0.17608  | -2.45208 | 0.015954 | 0.059834 | 1 |
| ENSG0000 response | Inflamed | FBXL7     | protein_cc chr5  | 15500305 | 15939900 | + | 4849 | 431.4893 | 0        | -0.45078 | 0.183846 | -2.45194 | 0.01596  | 0.059847 | 1 |
| ENSG0000 response | Inflamed | PDZK1IP1  | protein_cc chr1  | 47649265 | 47656716 | - | 1438 | 5309.575 | 0        | -0.71393 | 0.291219 | -2.45152 | 0.015978 | 0.059905 | 1 |
| ENSG0000 response | Inflamed | RP11-334L | pseudoger chr1   | 39174603 | 39176562 | + | 1960 | 9.873508 | 0.047733 | -0.37107 | 0.151369 | -2.45146 | 0.01598  | 0.059906 | 1 |
| ENSG0000 response | Inflamed | RP11-281F | lincRNA chr4     | 11627338 | 11815582 | + | 2006 | 9.252983 | 0.157518 | 0.56959  | 0.232363 | 2.451297 | 0.015987 | 0.059922 | 1 |
| ENSG0000 response | Inflamed | RP5-887A1 | lincRNA chr1     | 81001440 | 81112473 | + | 709  | 21.14797 | 0.066826 | -0.54568 | 0.222632 | -2.45103 | 0.015998 | 0.059956 | 1 |
| ENSG0000 response | Inflamed | MYO9B     | protein_cc chr19 | 17186591 | 17325346 | + | 9948 | 7743.322 | 0        | -0.27371 | 0.111679 | -2.45087 | 0.016005 | 0.059973 | 1 |
| ENSG0000 response | Inflamed | SIGLEC17P | pseudoger chr19  | 51670585 | 51676780 | + | 2279 | 90.12411 | 0        | -0.42937 | 0.175202 | -2.45073 | 0.016011 | 0.059985 | 1 |
| ENSG0000 response | Inflamed | C4orf3    | protein_cc chr4  | 1.2E+08  | 1.2E+08  | - | 2515 | 2365.971 | 0        | -0.25174 | 0.10275  | -2.45001 | 0.016041 | 0.060084 | 1 |
| ENSG0000 response | Inflamed | FBLN2     | protein_cc chr3  | 13573824 | 13679922 | + | 4996 | 1858.501 | 0        | -0.67063 | 0.273725 | -2.44999 | 0.016041 | 0.060084 | 1 |
| ENSG0000 response | Inflamed | NFATC2    | protein_cc chr20 | 50003494 | 50179370 | - | 8286 | 1229.298 | 0        | -0.43286 | 0.176716 | -2.44944 | 0.016065 | 0.060162 | 1 |
| ENSG0000 response | Inflamed | CHAF1B    | protein_cc chr21 | 37757676 | 37791313 | + | 5118 | 291.9714 | 0        | -0.29125 | 0.118914 | -2.44925 | 0.016073 | 0.060184 | 1 |
| ENSG0000 response | Inflamed | TRIM17    | protein_cc chr1  | 2.29E+08 | 2.29E+08 | - | 3548 | 15.09547 | 0.054893 | -0.46966 | 0.191766 | -2.44912 | 0.016078 | 0.060195 | 1 |
| ENSG0000 response | Inflamed | CTSA      | protein_cc chr20 | 44518783 | 44527459 | + | 5856 | 15698.76 | 0        | 0.257613 | 0.10519  | 2.449022 | 0.016082 | 0.060203 | 1 |
| ENSG0000 response | Inflamed | CCRN4L    | protein_cc chr4  | 1.4E+08  | 1.4E+08  | + | 1769 | 257.0931 | 0.002387 | -0.39078 | 0.159569 | -2.44895 | 0.016085 | 0.060205 | 1 |
| ENSG0000 response | Inflamed | GNL1      | protein_cc chr6  | 30509154 | 30524951 | - | 8646 | 2162.878 | 0        | -0.16671 | 0.068076 | -2.44886 | 0.016089 | 0.060211 | 1 |
| ENSG0000 response | Inflamed | RAPGEF1   | protein_cc chr9  | 1.34E+08 | 1.35E+08 | - | 7123 | 7290.652 | 0        | -0.27178 | 0.110985 | -2.44879 | 0.016092 | 0.060213 | 1 |
| ENSG0000 response | Inflamed | ABCA3     | protein_cc chr16 | 2325882  | 2390747  | - | 7804 | 409.6301 | 0        | -0.42325 | 0.17285  | -2.44864 | 0.016098 | 0.060228 | 1 |
| ENSG0000 response | Inflamed | MIR4722   | miRNA chr16      | 88782686 | 88782745 | - | 60   | 1.319809 | 0.651551 | -0.27836 | 0.113694 | -2.44827 | 0.016114 | 0.060277 | 1 |
| ENSG0000 response | Inflamed | AC010086  | pseudoger chrY   | 23473154 | 23480781 | + | 1052 | 1.513126 | 0.725537 | -0.32932 | 0.134513 | -2.44822 | 0.016116 | 0.060278 | 1 |
| ENSG0000 response | Inflamed | REEP4     | protein_cc chr8  | 21995533 | 21999464 | - | 2266 | 1578.78  | 0        | 0.226066 | 0.092346 | 2.448044 | 0.016123 | 0.060296 | 1 |
| ENSG0000 response | Inflamed | SMC5-AS1  | antisense chr9   | 72808913 | 72873782 | - | 1818 | 15.07876 | 0.016706 | 0.372393 | 0.152164 | 2.447318 | 0.016154 | 0.060402 | 1 |
| ENSG0000 response | Inflamed | GP9       | protein_cc chr3  | 1.29E+08 | 1.29E+08 | + | 889  | 9.057279 | 0.100239 | 0.445649 | 0.182156 | 2.446522 | 0.016188 | 0.060519 | 1 |
| ENSG0000 response | Inflamed | VAX2      | protein_cc chr2  | 71127720 | 71160576 | + | 1147 | 7.25537  | 0.085919 | -0.4021  | 0.164392 | -2.44597 | 0.016211 | 0.060584 | 1 |

|                   |          |           |                  |          |            |       |          |          |          |          |          |          |          |   |
|-------------------|----------|-----------|------------------|----------|------------|-------|----------|----------|----------|----------|----------|----------|----------|---|
| ENSG0000 response | Inflamed | DBI       | protein_cc chr2  | 1.2E+08  | 1.2E+08 +  | 2499  | 3598.632 | 0        | 0.286414 | 0.117098 | 2.445945 | 0.016212 | 0.060584 | 1 |
| ENSG0000 response | Inflamed | ARTN      | protein_cc chr1  | 44398992 | 44402913 + | 2658  | 104.2768 | 0        | 0.520316 | 0.212727 | 2.445936 | 0.016212 | 0.060584 | 1 |
| ENSG0000 response | Inflamed | PPAPDC2   | protein_cc chr9  | 4662298  | 4665256 +  | 2959  | 750.4988 | 0        | 0.303172 | 0.123951 | 2.445895 | 0.016214 | 0.060584 | 1 |
| ENSG0000 response | Inflamed | ARRDC4    | protein_cc chr15 | 98462784 | 98517068 + | 4118  | 2055.325 | 0        | 0.438641 | 0.179345 | 2.445797 | 0.016218 | 0.060591 | 1 |
| ENSG0000 response | Inflamed | JAM3      | protein_cc chr11 | 1.34E+08 | 1.34E+08 + | 5451  | 812.7064 | 0        | -0.45395 | 0.185624 | -2.44555 | 0.016229 | 0.060614 | 1 |
| ENSG0000 response | Inflamed | RP13-516M | antisense chr17  | 80172103 | 80175228 + | 2368  | 9.205251 | 0.119332 | -0.45353 | 0.185453 | -2.44555 | 0.016229 | 0.060614 | 1 |
| ENSG0000 response | Inflamed | RPL7      | protein_cc chr8  | 74202506 | 74208024 - | 2903  | 16993.06 | 0        | 0.266127 | 0.108834 | 2.445254 | 0.016241 | 0.060651 | 1 |
| ENSG0000 response | Inflamed | ANKRD27   | protein_cc chr19 | 33087913 | 33167503 - | 7855  | 1465.955 | 0        | 0.282172 | 0.1154   | 2.445175 | 0.016245 | 0.060655 | 1 |
| ENSG0000 response | Inflamed | RNF217    | protein_cc chr6  | 1.25E+08 | 1.25E+08 + | 12779 | 216.6826 | 0        | -0.44276 | 0.18112  | -2.44458 | 0.01627  | 0.060741 | 1 |
| ENSG0000 response | Inflamed | KCNA6     | protein_cc chr12 | 4918342  | 4960277 +  | 5977  | 45.91408 | 0.023866 | 0.494822 | 0.20242  | 2.444527 | 0.016272 | 0.060741 | 1 |
| ENSG0000 response | Inflamed | SPINK2    | protein_cc chr4  | 57676026 | 57687908 - | 766   | 18.89976 | 0.045346 | 0.442129 | 0.180955 | 2.443312 | 0.016324 | 0.060917 | 1 |
| ENSG0000 response | Inflamed | RNU6-925  | snRNA chr8       | 90912949 | 90913052 - | 104   | 0.756563 | 0.799523 | -0.21567 | 0.088272 | -2.44329 | 0.016325 | 0.060917 | 1 |
| ENSG0000 response | Inflamed | AC140481  | pseudoger chr2   | 1.31E+08 | 1.31E+08 + | 1722  | 2.460621 | 0.486874 | 0.394284 | 0.161377 | 2.443254 | 0.016326 | 0.060917 | 1 |
| ENSG0000 response | Inflamed | PELI3     | protein_cc chr11 | 66234216 | 66244808 + | 3807  | 243.9475 | 0        | -0.29166 | 0.119421 | -2.44233 | 0.016366 | 0.061056 | 1 |
| ENSG0000 response | Inflamed | CTC-350I8 | lincRNA chr5     | 1.32E+08 | 1.32E+08 + | 395   | 0.818616 | 0.785203 | 0.239792 | 0.098193 | 2.442061 | 0.016377 | 0.061089 | 1 |
| ENSG0000 response | Inflamed | SHPK      | protein_cc chr17 | 3468738  | 3539543 -  | 7400  | 5.00716  | 0.217184 | 0.375916 | 0.153944 | 2.441896 | 0.016384 | 0.061107 | 1 |
| ENSG0000 response | Inflamed | AC125232  | pseudoger chr2   | 87257800 | 87303536 - | 2277  | 107.1742 | 0        | 0.24235  | 0.099251 | 2.441799 | 0.016388 | 0.061114 | 1 |
| ENSG0000 response | Inflamed | HCG4B     | pseudoger chr6   | 29893760 | 29894750 - | 991   | 6.157518 | 0.159905 | 0.403589 | 0.1653   | 2.441552 | 0.016399 | 0.061144 | 1 |
| ENSG0000 response | Inflamed | PHF17     | protein_cc chr4  | 1.3E+08  | 1.3E+08 +  | 9110  | 565.5585 | 0        | -0.33616 | 0.13769  | -2.4414  | 0.016405 | 0.061152 | 1 |
| ENSG0000 response | Inflamed | RP3-437C1 | pseudoger chr6   | 51274879 | 51275335 - | 457   | 3.522673 | 0.252983 | -0.31064 | 0.127237 | -2.4414  | 0.016406 | 0.061152 | 1 |
| ENSG0000 response | Inflamed | CTD-3128C | antisense chr19  | 6748304  | 6751478 -  | 686   | 35.43675 | 0.01432  | 0.492455 | 0.201782 | 2.440529 | 0.016443 | 0.061282 | 1 |
| ENSG0000 response | Inflamed | KREMEN2   | protein_cc chr16 | 3013945  | 3018384 +  | 2614  | 32.82578 | 0        | 0.402672 | 0.165004 | 2.440377 | 0.016449 | 0.06129  | 1 |
| ENSG0000 response | Inflamed | CTF1      | protein_cc chr16 | 30907928 | 30914881 + | 1664  | 56.65394 | 0        | -0.40903 | 0.167608 | -2.44037 | 0.01645  | 0.06129  | 1 |
| ENSG0000 response | Inflamed | CTD-2031F | antisense chr5   | 55290995 | 55299477 + | 2289  | 9.725537 | 0.054893 | 0.399475 | 0.163713 | 2.440103 | 0.016461 | 0.061322 | 1 |
| ENSG0000 response | Inflamed | H1FX      | protein_cc chr3  | 1.29E+08 | 1.29E+08 - | 1506  | 3432.162 | 0        | -0.30041 | 0.123119 | -2.44002 | 0.016465 | 0.061322 | 1 |
| ENSG0000 response | Inflamed | CELA1     | protein_cc chr12 | 51722227 | 51740463 - | 952   | 2.486874 | 0.448687 | -0.32121 | 0.131643 | -2.44001 | 0.016465 | 0.061322 | 1 |
| ENSG0000 response | Inflamed | RND1      | protein_cc chr12 | 49250928 | 49259681 - | 3099  | 411.1241 | 0.002387 | -0.55504 | 0.227508 | -2.43964 | 0.016481 | 0.061372 | 1 |
| ENSG0000 response | Inflamed | IZUMO2    | protein_cc chr19 | 50655805 | 50666452 - | 1511  | 1.725537 | 0.696897 | 0.444462 | 0.182189 | 2.439571 | 0.016484 | 0.061374 | 1 |
| ENSG0000 response | Inflamed | BCL2L13   | protein_cc chr22 | 18111621 | 18213388 + | 7527  | 2150.42  | 0        | 0.181189 | 0.074275 | 2.439448 | 0.016489 | 0.061385 | 1 |
| ENSG0000 response | Inflamed | CYP2AB1P  | pseudoger chr3   | 1.84E+08 | 1.84E+08 - | 1831  | 7.73031  | 0.486874 | -0.68722 | 0.281735 | -2.43926 | 0.016497 | 0.061407 | 1 |
| ENSG0000 response | Inflamed | GPR31     | protein_cc chr6  | 1.68E+08 | 1.68E+08 - | 2059  | 6.353222 | 0.217184 | -0.46053 | 0.188817 | -2.43905 | 0.016506 | 0.061431 | 1 |
| ENSG0000 response | Inflamed | RP11-415F | antisense chr3   | 16380815 | 16381378 + | 564   | 15.51313 | 0.078759 | 0.512289 | 0.210079 | 2.438551 | 0.016528 | 0.061503 | 1 |
| ENSG0000 response | Inflamed | LRRTM2    | protein_cc chr5  | 1.38E+08 | 1.38E+08 - | 6095  | 23.66348 | 0.033413 | -0.51191 | 0.209975 | -2.43796 | 0.016553 | 0.06158  | 1 |
| ENSG0000 response | Inflamed | BMP8B     | protein_cc chr1  | 40222854 | 40254533 - | 5143  | 735.1408 | 0        | 0.322142 | 0.132137 | 2.437934 | 0.016554 | 0.06158  | 1 |
| ENSG0000 response | Inflamed | ATP5SL    | protein_cc chr19 | 41937223 | 41946622 - | 4381  | 1384.246 | 0        | 0.136794 | 0.056111 | 2.437904 | 0.016556 | 0.06158  | 1 |
| ENSG0000 response | Inflamed | RP11-513I | lincRNA chr6     | 34247456 | 34254545 + | 7090  | 17.94749 | 0.052506 | -0.50757 | 0.208269 | -2.43709 | 0.016591 | 0.061693 | 1 |
| ENSG0000 response | Inflamed | ARHGAP25  | protein_cc chr1  | 94614544 | 94740624 - | 15524 | 355.6635 | 0.002387 | -0.67891 | 0.278575 | -2.43709 | 0.016591 | 0.061693 | 1 |
| ENSG0000 response | Inflamed | RP11-137F | antisense chr10  | 82289353 | 82295698 - | 598   | 7.46778  | 0.138425 | -0.36109 | 0.148168 | -2.43704 | 0.016593 | 0.061693 | 1 |
| ENSG0000 response | Inflamed | MFSD6     | protein_cc chr2  | 1.91E+08 | 1.91E+08 + | 6031  | 2977.167 | 0        | 0.357437 | 0.146718 | 2.436214 | 0.016629 | 0.061817 | 1 |
| ENSG0000 response | Inflamed | EFNB2     | protein_cc chr13 | 1.07E+08 | 1.07E+08 - | 4461  | 6142.422 | 0        | 0.450983 | 0.185143 | 2.435863 | 0.016644 | 0.061865 | 1 |

|                   |          |            |                  |          |          |   |       |          |          |          |          |          |          |          |   |
|-------------------|----------|------------|------------------|----------|----------|---|-------|----------|----------|----------|----------|----------|----------|----------|---|
| ENSG0000 response | Inflamed | FAM109A    | protein_cc chr12 | 1.12E+08 | 1.12E+08 | - | 3361  | 1848.048 | 0        | 0.272591 | 0.111923 | 2.435522 | 0.016659 | 0.061911 | 1 |
| ENSG0000 response | Inflamed | AC007292   | antisense chr19  | 4363786  | 4364637  | + | 746   | 35.2315  | 0.00716  | 0.331365 | 0.136062 | 2.435395 | 0.016664 | 0.061923 | 1 |
| ENSG0000 response | Inflamed | MED27      | protein_cc chr9  | 1.35E+08 | 1.35E+08 | - | 1823  | 345.2625 | 0        | -0.18842 | 0.077371 | -2.43525 | 0.016671 | 0.061938 | 1 |
| ENSG0000 response | Inflamed | CLEC4G     | protein_cc chr19 | 7793843  | 7798792  | - | 1754  | 32.40334 | 0.004773 | -0.49552 | 0.203501 | -2.43497 | 0.016683 | 0.061974 | 1 |
| ENSG0000 response | Inflamed | RIMS3      | protein_cc chr1  | 41086351 | 41131329 | - | 7235  | 2217.138 | 0        | 0.391505 | 0.160801 | 2.434724 | 0.016693 | 0.062005 | 1 |
| ENSG0000 response | Inflamed | ARHGAP22   | protein_cc chr10 | 49654077 | 49864310 | - | 6783  | 162.9833 | 0        | -0.34812 | 0.143    | -2.43443 | 0.016706 | 0.062044 | 1 |
| ENSG0000 response | Inflamed | IGFALS     | protein_cc chr16 | 1840414  | 1844972  | - | 2363  | 170.8783 | 0.004773 | 0.76002  | 0.312233 | 2.434141 | 0.016719 | 0.062081 | 1 |
| ENSG0000 response | Inflamed | NAIP       | protein_cc chr5  | 70264310 | 70320941 | - | 9513  | 110.7303 | 0.009547 | -0.55456 | 0.227845 | -2.43395 | 0.016727 | 0.062096 | 1 |
| ENSG0000 response | Inflamed | NDUFB2-A   | antisense chr7   | 1.4E+08  | 1.4E+08  | - | 1648  | 24.81623 | 0.009547 | -0.26824 | 0.110208 | -2.43394 | 0.016727 | 0.062096 | 1 |
| ENSG0000 response | Inflamed | CITF22-49I | lincRNA chr22    | 47741319 | 47769291 | + | 4364  | 0.902148 | 0.787589 | -0.25832 | 0.106149 | -2.4336  | 0.016742 | 0.062142 | 1 |
| ENSG0000 response | Inflamed | SRSF8      | pseudoger chr11  | 94800056 | 94804388 | + | 4331  | 583.3437 | 0        | 0.31361  | 0.128884 | 2.433278 | 0.016756 | 0.062186 | 1 |
| ENSG0000 response | Inflamed | SLC2A8     | protein_cc chr9  | 1.3E+08  | 1.3E+08  | + | 3924  | 876.1241 | 0        | 0.183722 | 0.075512 | 2.433013 | 0.016768 | 0.06222  | 1 |
| ENSG0000 response | Inflamed | BACE2      | protein_cc chr21 | 42539728 | 42654445 | + | 9619  | 7111.062 | 0        | -0.30422 | 0.125055 | -2.43268 | 0.016782 | 0.062265 | 1 |
| ENSG0000 response | Inflamed | UGT1A13F   | pseudoger chr2   | 2.35E+08 | 2.35E+08 | + | 762   | 1.732697 | 0.642005 | 0.321875 | 0.132319 | 2.432564 | 0.016788 | 0.062275 | 1 |
| ENSG0000 response | Inflamed | AP1AR      | protein_cc chr4  | 1.13E+08 | 1.13E+08 | + | 3444  | 718.8162 | 0.002387 | 0.414836 | 0.170546 | 2.432391 | 0.016795 | 0.062294 | 1 |
| ENSG0000 response | Inflamed | VARS       | protein_cc chr6  | 31745295 | 31763730 | - | 6081  | 3880.635 | 0        | -0.25811 | 0.106119 | -2.43229 | 0.016799 | 0.062302 | 1 |
| ENSG0000 response | Inflamed | RP11-387A  | antisense chr2   | 1.77E+08 | 1.77E+08 | - | 1553  | 8.042959 | 0.136038 | 0.433852 | 0.178397 | 2.431953 | 0.016814 | 0.062348 | 1 |
| ENSG0000 response | Inflamed | IL1R2      | protein_cc chr2  | 1.03E+08 | 1.03E+08 | + | 3073  | 1308.783 | 0        | 0.472956 | 0.194493 | 2.431735 | 0.016824 | 0.062374 | 1 |
| ENSG0000 response | Inflamed | LY6G6C     | protein_cc chr6  | 31686425 | 31689622 | - | 1103  | 8.670644 | 0.124105 | 0.500773 | 0.205943 | 2.431608 | 0.016829 | 0.062386 | 1 |
| ENSG0000 response | Inflamed | RP11-723C  | antisense chr3   | 1.29E+08 | 1.29E+08 | - | 1456  | 15.36516 | 0.057279 | -0.46557 | 0.191515 | -2.43099 | 0.016856 | 0.062477 | 1 |
| ENSG0000 response | Inflamed | AC006953   | miRNA chr19      | 44167328 | 44167426 | - | 99    | 6.236277 | 0.257757 | -0.45163 | 0.185795 | -2.43079 | 0.016865 | 0.062501 | 1 |
| ENSG0000 response | Inflamed | LHFPL1     | protein_cc chrX  | 1.12E+08 | 1.12E+08 | - | 1843  | 1.778043 | 0.563246 | -0.37262 | 0.1533   | -2.4307  | 0.016869 | 0.062508 | 1 |
| ENSG0000 response | Inflamed | RPL11      | protein_cc chr1  | 24018269 | 24022915 | + | 1987  | 18456.96 | 0        | 0.32245  | 0.132678 | 2.430325 | 0.016886 | 0.062559 | 1 |
| ENSG0000 response | Inflamed | UBL3       | protein_cc chr13 | 30338508 | 30424821 | - | 4384  | 1747.737 | 0        | 0.351587 | 0.144671 | 2.430253 | 0.016889 | 0.062562 | 1 |
| ENSG0000 response | Inflamed | SYBU       | protein_cc chr8  | 1.11E+08 | 1.11E+08 | - | 7024  | 590.7518 | 0        | 0.356147 | 0.146552 | 2.430184 | 0.016892 | 0.062565 | 1 |
| ENSG0000 response | Inflamed | AF011889   | lincRNA chrX     | 1.49E+08 | 1.49E+08 | - | 655   | 18.00239 | 0.095465 | 0.56432  | 0.232225 | 2.430054 | 0.016897 | 0.062577 | 1 |
| ENSG0000 response | Inflamed | TRAV20     | TR_V_gen chr14   | 22508840 | 22509399 | + | 406   | 7.00716  | 0.159905 | -0.4116  | 0.169389 | -2.4299  | 0.016904 | 0.062594 | 1 |
| ENSG0000 response | Inflamed | TALDO1     | protein_cc chr11 | 747329   | 765024   | + | 3005  | 4768.74  | 0        | -0.18353 | 0.075547 | -2.42936 | 0.016928 | 0.062664 | 1 |
| ENSG0000 response | Inflamed | SRPRB      | protein_cc chr3  | 1.34E+08 | 1.34E+08 | + | 4180  | 1779.78  | 0        | -0.26515 | 0.109145 | -2.42936 | 0.016928 | 0.062664 | 1 |
| ENSG0000 response | Inflamed | DNM2       | protein_cc chr19 | 10828755 | 10944164 | + | 13443 | 23201.78 | 0        | 0.245716 | 0.101151 | 2.429199 | 0.016935 | 0.062681 | 1 |
| ENSG0000 response | Inflamed | CTD-2383I  | antisense chr11  | 1.01E+08 | 1.01E+08 | - | 1865  | 3.379475 | 0.300716 | 0.355075 | 0.146201 | 2.428682 | 0.016958 | 0.062752 | 1 |
| ENSG0000 response | Inflamed | BTBD3      | protein_cc chr20 | 11871371 | 11907257 | + | 6228  | 1605.332 | 0        | 0.385568 | 0.158758 | 2.428654 | 0.016959 | 0.062752 | 1 |
| ENSG0000 response | Inflamed | CASK       | protein_cc chrX  | 41374187 | 41782716 | - | 10547 | 2396.267 | 0        | 0.365108 | 0.150346 | 2.428446 | 0.016968 | 0.062777 | 1 |
| ENSG0000 response | Inflamed | CTC-246B1  | sense_ove chr19  | 39805291 | 39811498 | - | 877   | 2.949881 | 0.338902 | -0.35443 | 0.145986 | -2.42781 | 0.016996 | 0.062872 | 1 |
| ENSG0000 response | Inflamed | CTD-2165I  | pseudoger chr5   | 14620129 | 14621422 | + | 1294  | 7.367542 | 0.205251 | 0.483073 | 0.198992 | 2.427607 | 0.017005 | 0.062896 | 1 |
| ENSG0000 response | Inflamed | RP11-169K  | pseudoger chr1   | 16133679 | 16134194 | - | 516   | 173.9761 | 0        | 0.297362 | 0.122504 | 2.427369 | 0.017016 | 0.062926 | 1 |
| ENSG0000 response | Inflamed | PPEF1      | protein_cc chrX  | 18694029 | 18846039 | + | 3515  | 1.854415 | 0.565632 | -0.32088 | 0.132204 | -2.42718 | 0.017024 | 0.062949 | 1 |
| ENSG0000 response | Inflamed | KCP        | processed_chr7   | 1.29E+08 | 1.29E+08 | - | 8326  | 124.9356 | 0        | -0.51036 | 0.21033  | -2.4265  | 0.017054 | 0.063047 | 1 |
| ENSG0000 response | Inflamed | PRSS36     | protein_cc chr16 | 31150246 | 31161415 | - | 3685  | 167.9093 | 0        | 0.323508 | 0.133325 | 2.426467 | 0.017056 | 0.063047 | 1 |
| ENSG0000 response | Inflamed | MIR4454    | antisense chr5   | 1.7E+08  | 1.7E+08  | - | 1191  | 2.656325 | 0.501193 | -0.39867 | 0.164315 | -2.42628 | 0.017064 | 0.063069 | 1 |

|                   |          |            |            |       |          |          |   |       |          |          |          |          |          |          |          |   |
|-------------------|----------|------------|------------|-------|----------|----------|---|-------|----------|----------|----------|----------|----------|----------|----------|---|
| ENSG0000 response | Inflamed | RP5-902P8  | lincRNA    | chr1  | 1210603  | 1215800  | + | 513   | 10.55131 | 0.083532 | -0.41634 | 0.171616 | -2.42603 | 0.017075 | 0.063102 | 1 |
| ENSG0000 response | Inflamed | USP30-AS1  | antisense  | chr12 | 1.09E+08 | 1.09E+08 | - | 656   | 108.3222 | 0        | -0.34511 | 0.142269 | -2.42573 | 0.017088 | 0.063139 | 1 |
| ENSG0000 response | Inflamed | LNP1       | protein_cc | chr3  | 1E+08    | 1E+08    | + | 2249  | 51.11456 | 0.00716  | -0.37011 | 0.152581 | -2.42569 | 0.01709  | 0.063139 | 1 |
| ENSG0000 response | Inflamed | RP11-360F  | lincRNA    | chr4  | 39135533 | 39137228 | + | 455   | 8.470167 | 0.176611 | -0.49222 | 0.202927 | -2.42558 | 0.017095 | 0.063149 | 1 |
| ENSG0000 response | Inflamed | AC090587   | antisense  | chr11 | 3875548  | 3876739  | - | 494   | 7.642005 | 0.02148  | -0.27652 | 0.114013 | -2.42537 | 0.017105 | 0.063174 | 1 |
| ENSG0000 response | Inflamed | CTD-2620I  | lincRNA    | chr19 | 53510765 | 53516433 | + | 4060  | 0.904535 | 0.789976 | -0.26771 | 0.110382 | -2.42531 | 0.017107 | 0.063174 | 1 |
| ENSG0000 response | Inflamed | AC009133   | antisense  | chr16 | 29819966 | 29823306 | - | 2725  | 925.6062 | 0        | 0.518959 | 0.213982 | 2.425248 | 0.01711  | 0.063176 | 1 |
| ENSG0000 response | Inflamed | TPD52      | protein_cc | chr8  | 80870571 | 81143467 | - | 8341  | 7407.253 | 0        | 0.367596 | 0.151582 | 2.425067 | 0.017118 | 0.063197 | 1 |
| ENSG0000 response | Inflamed | CBLN4      | protein_cc | chr20 | 54572496 | 54580528 | - | 3024  | 4.732697 | 0.362768 | 0.481511 | 0.198571 | 2.424879 | 0.017126 | 0.063219 | 1 |
| ENSG0000 response | Inflamed | SLC35B4    | protein_cc | chr7  | 1.34E+08 | 1.34E+08 | - | 7109  | 543.2124 | 0        | -0.34489 | 0.142252 | -2.42453 | 0.017142 | 0.063266 | 1 |
| ENSG0000 response | Inflamed | LINC0101C  | lincRNA    | chr6  | 1.35E+08 | 1.35E+08 | + | 2583  | 2.319809 | 0.527446 | -0.37795 | 0.15589  | -2.42448 | 0.017144 | 0.063266 | 1 |
| ENSG0000 response | Inflamed | COPE       | protein_cc | chr19 | 19010323 | 19030206 | - | 2885  | 4515.654 | 0        | -0.17345 | 0.071557 | -2.42396 | 0.017167 | 0.063343 | 1 |
| ENSG0000 response | Inflamed | HSD17B3    | protein_cc | chr9  | 98997588 | 99064434 | - | 2056  | 26.26253 | 0.045346 | 0.516462 | 0.213076 | 2.423834 | 0.017173 | 0.063355 | 1 |
| ENSG0000 response | Inflamed | TMEM215    | protein_cc | chr9  | 32783497 | 32787397 | + | 3581  | 4.818616 | 0.384248 | -0.49956 | 0.206166 | -2.4231  | 0.017205 | 0.063459 | 1 |
| ENSG0000 response | Inflamed | MPPED2     | protein_cc | chr11 | 30406040 | 30608419 | - | 8198  | 12.54654 | 0.059666 | -0.47998 | 0.198084 | -2.42309 | 0.017206 | 0.063459 | 1 |
| ENSG0000 response | Inflamed | PPP1R11    | protein_cc | chr6  | 30034486 | 30038110 | + | 2538  | 5304.241 | 0        | 0.154571 | 0.063808 | 2.42242  | 0.017236 | 0.063561 | 1 |
| ENSG0000 response | Inflamed | CD300LD    | protein_cc | chr17 | 72575504 | 72588422 | - | 1303  | 1.933174 | 0.763723 | -0.43633 | 0.180181 | -2.4216  | 0.017273 | 0.063682 | 1 |
| ENSG0000 response | Inflamed | FOXP1      | protein_cc | chr3  | 71003844 | 71633140 | - | 13359 | 2118.979 | 0        | 0.287191 | 0.118597 | 2.421583 | 0.017273 | 0.063682 | 1 |
| ENSG0000 response | Inflamed | CTB-83J4.1 | lincRNA    | chr19 | 54728395 | 54728753 | + | 359   | 0.909308 | 0.775656 | -0.24312 | 0.100404 | -2.42141 | 0.017281 | 0.063702 | 1 |
| ENSG0000 response | Inflamed | MOXD1      | protein_cc | chr6  | 1.33E+08 | 1.33E+08 | - | 5293  | 334.0955 | 0        | -0.54244 | 0.224174 | -2.41971 | 0.017357 | 0.063974 | 1 |
| ENSG0000 response | Inflamed | ERO1LB     | protein_cc | chr1  | 2.36E+08 | 2.36E+08 | - | 5688  | 286.1623 | 0        | -0.4371  | 0.180655 | -2.41952 | 0.017366 | 0.063997 | 1 |
| ENSG0000 response | Inflamed | TRIM69     | protein_cc | chr15 | 45021186 | 45060027 | + | 9237  | 1773.785 | 0        | -0.30323 | 0.125347 | -2.41912 | 0.017384 | 0.064046 | 1 |
| ENSG0000 response | Inflamed | SLC10A5    | protein_cc | chr8  | 82605842 | 82608409 | - | 2568  | 54.09069 | 0.009547 | 0.609047 | 0.251764 | 2.419115 | 0.017384 | 0.064046 | 1 |
| ENSG0000 response | Inflamed | UBE2I      | protein_cc | chr16 | 1355548  | 1377019  | + | 12368 | 3538.573 | 0        | -0.1164  | 0.04812  | -2.4189  | 0.017394 | 0.064072 | 1 |
| ENSG0000 response | Inflamed | PAPSS2     | protein_cc | chr10 | 89419370 | 89507462 | + | 4116  | 9500.895 | 0        | 0.336309 | 0.139047 | 2.418673 | 0.017404 | 0.064101 | 1 |
| ENSG0000 response | Inflamed | HOXB-AS1   | antisense  | chr17 | 46620913 | 46628610 | + | 1557  | 35.3389  | 0.004773 | -0.43048 | 0.177988 | -2.41858 | 0.017408 | 0.064107 | 1 |
| ENSG0000 response | Inflamed | CEBPD      | protein_cc | chr8  | 48649471 | 48651648 | - | 2178  | 2404.036 | 0        | -0.36308 | 0.15016  | -2.41792 | 0.017438 | 0.064205 | 1 |
| ENSG0000 response | Inflamed | RP11-153I  | pseudoger  | chr4  | 1.55E+08 | 1.55E+08 | + | 1082  | 0.933174 | 0.778043 | -0.23814 | 0.098491 | -2.41787 | 0.01744  | 0.064205 | 1 |
| ENSG0000 response | Inflamed | TMEM218    | protein_cc | chr11 | 1.25E+08 | 1.25E+08 | - | 5467  | 465.5632 | 0        | -0.20101 | 0.083136 | -2.41783 | 0.017442 | 0.064205 | 1 |
| ENSG0000 response | Inflamed | RP11-927F  | pseudoger  | chr17 | 62774960 | 62775055 | - | 96    | 27.93795 | 0.019093 | 0.378069 | 0.156384 | 2.417569 | 0.017454 | 0.06424  | 1 |
| ENSG0000 response | Inflamed | HOXD9      | protein_cc | chr2  | 1.77E+08 | 1.77E+08 | + | 2418  | 156.2172 | 0        | -0.49206 | 0.203563 | -2.41726 | 0.017468 | 0.064282 | 1 |
| ENSG0000 response | Inflamed | CA8        | protein_cc | chr8  | 61099906 | 61193971 | - | 5783  | 225.9451 | 0        | 0.399276 | 0.165181 | 2.4172   | 0.017471 | 0.064283 | 1 |
| ENSG0000 response | Inflamed | NOXO1      | protein_cc | chr16 | 2028918  | 2034193  | - | 2159  | 676.9093 | 0        | 0.450889 | 0.186547 | 2.417025 | 0.017479 | 0.064303 | 1 |
| ENSG0000 response | Inflamed | PKP3       | protein_cc | chr11 | 392614   | 404908   | + | 3787  | 8272.353 | 0        | 0.478295 | 0.197896 | 2.416904 | 0.017484 | 0.064314 | 1 |
| ENSG0000 response | Inflamed | RP11-421I  | pseudoger  | chr18 | 65945039 | 65945480 | - | 442   | 13.03103 | 0.02148  | 0.354149 | 0.146541 | 2.416721 | 0.017492 | 0.064326 | 1 |
| ENSG0000 response | Inflamed | ATP1A3     | protein_cc | chr19 | 42470734 | 42501649 | - | 5069  | 62.15752 | 0.01432  | -0.48113 | 0.199084 | -2.4167  | 0.017493 | 0.064326 | 1 |
| ENSG0000 response | Inflamed | SUCLG2P2   | pseudoger  | chr12 | 94942017 | 94943312 | + | 1296  | 11.65632 | 0.050119 | 0.375243 | 0.155278 | 2.416587 | 0.017498 | 0.064326 | 1 |
| ENSG0000 response | Inflamed | RPS29P12   | pseudoger  | chr5  | 1.8E+08  | 1.8E+08  | + | 152   | 2.649165 | 0.508353 | 0.402367 | 0.166502 | 2.416586 | 0.017498 | 0.064326 | 1 |
| ENSG0000 response | Inflamed | SUV39H1    | protein_cc | chrX  | 48553945 | 48567403 | + | 3368  | 424.7232 | 0        | -0.22146 | 0.091642 | -2.41656 | 0.017499 | 0.064326 | 1 |
| ENSG0000 response | Inflamed | AUTS2      | protein_cc | chr7  | 69063905 | 70258054 | + | 10418 | 1669.936 | 0        | 0.42638  | 0.176458 | 2.416326 | 0.01751  | 0.064357 | 1 |

|                   |          |            |                  |          |          |   |       |          |          |          |          |          |          |          |   |
|-------------------|----------|------------|------------------|----------|----------|---|-------|----------|----------|----------|----------|----------|----------|----------|---|
| ENSG0000 response | Inflamed | LINC00908  | protein_cc chr18 | 74240612 | 74322925 | + | 3036  | 8.665871 | 0.045346 | -0.40445 | 0.167413 | -2.41585 | 0.017532 | 0.064426 | 1 |
| ENSG0000 response | Inflamed | RP11-366A  | pseudoger chr4   | 1.66E+08 | 1.66E+08 | - | 1416  | 8.090692 | 0.097852 | -0.43002 | 0.178017 | -2.41562 | 0.017542 | 0.064456 | 1 |
| ENSG0000 response | Inflamed | PHOSPHO1   | protein_cc chr2  | 1.71E+08 | 1.71E+08 | + | 1477  | 69.90215 | 0        | 0.353195 | 0.146225 | 2.415418 | 0.017551 | 0.064481 | 1 |
| ENSG0000 response | Inflamed | AC003104   | sense_intr chr17 | 40422535 | 40424701 | - | 1496  | 2.923628 | 0.384248 | -0.38392 | 0.158954 | -2.41532 | 0.017556 | 0.064487 | 1 |
| ENSG0000 response | Inflamed | PLA2G3     | protein_cc chr22 | 31530795 | 31536593 | - | 2697  | 75.44153 | 0.126492 | -0.84522 | 0.349948 | -2.41528 | 0.017558 | 0.064487 | 1 |
| ENSG0000 response | Inflamed | TLR5       | protein_cc chr1  | 2.23E+08 | 2.23E+08 | - | 4651  | 148.6205 | 0        | -0.43851 | 0.181567 | -2.41515 | 0.017564 | 0.064498 | 1 |
| ENSG0000 response | Inflamed | GJC3       | protein_cc chr7  | 99520892 | 99527243 | - | 1116  | 2.286396 | 0.446301 | -0.34004 | 0.140804 | -2.41497 | 0.017572 | 0.06452  | 1 |
| ENSG0000 response | Inflamed | CACNA1A    | protein_cc chr19 | 13317256 | 13734804 | - | 10904 | 152.0621 | 0        | 0.514575 | 0.213088 | 2.41485  | 0.017577 | 0.064531 | 1 |
| ENSG0000 response | Inflamed | JUND       | protein_cc chr19 | 18390563 | 18392432 | - | 1870  | 6651.37  | 0        | 0.255655 | 0.10589  | 2.414348 | 0.0176   | 0.064606 | 1 |
| ENSG0000 response | Inflamed | ZNF667-AS1 | lincRNA chr19    | 56988619 | 57012035 | + | 3623  | 83.18138 | 0        | -0.3903  | 0.161663 | -2.41427 | 0.017604 | 0.064607 | 1 |
| ENSG0000 response | Inflamed | TMEM170    | protein_cc chr6  | 11537938 | 11583757 | + | 8426  | 112.1432 | 0.004773 | -0.45064 | 0.186665 | -2.41418 | 0.017608 | 0.064607 | 1 |
| ENSG0000 response | Inflamed | RP5-884M   | lincRNA chr7     | 1.06E+08 | 1.06E+08 | + | 3542  | 77.30072 | 0.155131 | -0.86092 | 0.356611 | -2.41417 | 0.017608 | 0.064607 | 1 |
| ENSG0000 response | Inflamed | SULF2      | protein_cc chr20 | 46285092 | 46415360 | - | 6657  | 7129.613 | 0        | -0.25479 | 0.105541 | -2.41413 | 0.01761  | 0.064607 | 1 |
| ENSG0000 response | Inflamed | HIST1H2A1  | protein_cc chr6  | 26217165 | 26217711 | + | 547   | 30.23389 | 0.002387 | 0.387505 | 0.160526 | 2.413975 | 0.017617 | 0.064623 | 1 |
| ENSG0000 response | Inflamed | LIMS1      | protein_cc chr2  | 1.09E+08 | 1.09E+08 | + | 7626  | 1244.933 | 0        | -0.40406 | 0.167401 | -2.41371 | 0.017629 | 0.064659 | 1 |
| ENSG0000 response | Inflamed | COX7A1     | protein_cc chr19 | 36641824 | 36643771 | - | 1006  | 107.2124 | 0.002387 | -0.49127 | 0.203547 | -2.41353 | 0.017637 | 0.06468  | 1 |
| ENSG0000 response | Inflamed | RP11-456C  | lincRNA chr18    | 53750587 | 53804767 | - | 3458  | 1.97136  | 0.634845 | -0.37718 | 0.156302 | -2.41313 | 0.017656 | 0.064737 | 1 |
| ENSG0000 response | Inflamed | COX19      | protein_cc chr7  | 938415   | 1015235  | - | 5542  | 688.9952 | 0        | 0.193549 | 0.080214 | 2.412897 | 0.017666 | 0.064767 | 1 |
| ENSG0000 response | Inflamed | RP11-395E  | antisense chr7   | 1.01E+08 | 1.01E+08 | - | 407   | 14.9642  | 0.004773 | -0.3999  | 0.165744 | -2.41278 | 0.017672 | 0.064773 | 1 |
| ENSG0000 response | Inflamed | RP11-1191  | antisense chr4   | 646639   | 649434   | - | 1785  | 1.615752 | 0.653938 | -0.31322 | 0.129818 | -2.41276 | 0.017673 | 0.064773 | 1 |
| ENSG0000 response | Inflamed | GHR        | protein_cc chr5  | 42423879 | 42721979 | + | 5871  | 112.0167 | 0.009547 | 0.486768 | 0.201762 | 2.412586 | 0.01768  | 0.064792 | 1 |
| ENSG0000 response | Inflamed | RP11-725F  | lincRNA chr2     | 1.33E+08 | 1.33E+08 | - | 1682  | 14.70644 | 0.081146 | 0.500724 | 0.207554 | 2.412503 | 0.017684 | 0.064797 | 1 |
| ENSG0000 response | Inflamed | ACVRL1     | protein_cc chr12 | 52300692 | 52317145 | + | 5040  | 8823.988 | 0        | 0.247831 | 0.102731 | 2.412427 | 0.017688 | 0.064801 | 1 |
| ENSG0000 response | Inflamed | SCD5       | protein_cc chr4  | 83550692 | 83720010 | - | 4551  | 245.5418 | 0        | -0.37461 | 0.155287 | -2.41237 | 0.01769  | 0.064802 | 1 |
| ENSG0000 response | Inflamed | RP1-283K1  | antisense chr6   | 1.34E+08 | 1.34E+08 | - | 317   | 1.157518 | 0.720764 | 0.263076 | 0.10906  | 2.412219 | 0.017697 | 0.064814 | 1 |
| ENSG0000 response | Inflamed | ERN1       | protein_cc chr17 | 62116502 | 62208179 | - | 10864 | 2035.205 | 0        | -0.31144 | 0.129109 | -2.41219 | 0.017699 | 0.064814 | 1 |
| ENSG0000 response | Inflamed | JAGN1      | protein_cc chr3  | 9932238  | 9936033  | + | 1799  | 1368.026 | 0        | 0.171729 | 0.071199 | 2.411942 | 0.01771  | 0.064846 | 1 |
| ENSG0000 response | Inflamed | RP1        | protein_cc chr8  | 55528627 | 55543394 | + | 7100  | 1.357995 | 0.76611  | -0.34803 | 0.144304 | -2.41175 | 0.017719 | 0.064864 | 1 |
| ENSG0000 response | Inflamed | GTSE1      | protein_cc chr22 | 46692638 | 46726707 | + | 4242  | 543.4439 | 0        | -0.33086 | 0.13719  | -2.41172 | 0.01772  | 0.064864 | 1 |
| ENSG0000 response | Inflamed | LEMD1      | protein_cc chr1  | 2.05E+08 | 2.05E+08 | - | 1063  | 2.147971 | 0.610979 | -0.41993 | 0.174167 | -2.41105 | 0.017751 | 0.064968 | 1 |
| ENSG0000 response | Inflamed | RP11-129J  | lincRNA chr10    | 1.01E+08 | 1.01E+08 | + | 392   | 3.76611  | 0.291169 | -0.34493 | 0.143083 | -2.41071 | 0.017767 | 0.065018 | 1 |
| ENSG0000 response | Inflamed | MACROD2    | protein_cc chr20 | 13976015 | 16033842 | + | 11342 | 50.6253  | 0.019093 | 0.52157  | 0.216361 | 2.41065  | 0.017769 | 0.065018 | 1 |
| ENSG0000 response | Inflamed | COQ7       | protein_cc chr16 | 19078921 | 19091417 | + | 4120  | 697.2363 | 0        | 0.22851  | 0.0948   | 2.410438 | 0.017779 | 0.065045 | 1 |
| ENSG0000 response | Inflamed | LINC0087C  | lincRNA chr3     | 72200408 | 72223483 | + | 2933  | 13.32458 | 0.090692 | 0.501393 | 0.208034 | 2.410148 | 0.017792 | 0.065084 | 1 |
| ENSG0000 response | Inflamed | BTBD9      | protein_cc chr6  | 38136227 | 38607924 | - | 9451  | 1551.337 | 0        | 0.268087 | 0.111237 | 2.410067 | 0.017796 | 0.065089 | 1 |
| ENSG0000 response | Inflamed | RPL22      | protein_cc chr1  | 6241329  | 6269449  | - | 4900  | 5882.728 | 0        | 0.262957 | 0.109119 | 2.409813 | 0.017808 | 0.065123 | 1 |
| ENSG0000 response | Inflamed | AC103563   | antisense chr2   | 95690938 | 95692454 | - | 478   | 1.210024 | 0.727924 | -0.30045 | 0.124684 | -2.40967 | 0.017814 | 0.065137 | 1 |
| ENSG0000 response | Inflamed | AL161668   | lincRNA chr14    | 21492331 | 21497430 | + | 593   | 3.873508 | 0.338902 | 0.300181 | 0.124598 | 2.409195 | 0.017836 | 0.065204 | 1 |
| ENSG0000 response | Inflamed | RP11-552I  | sense_ove chr1   | 1.12E+08 | 1.12E+08 | - | 861   | 7.546539 | 0.088305 | 0.4007   | 0.166323 | 2.409169 | 0.017837 | 0.065204 | 1 |
| ENSG0000 response | Inflamed | MT-TE      | Mt_trRNA chrM    | 14674    | 14742    | - | 69    | 116.4606 | 0        | 0.439417 | 0.1824   | 2.40908  | 0.017842 | 0.06521  | 1 |

|                   |          |           |                  |          |          |   |       |          |          |          |          |          |          |          |   |
|-------------------|----------|-----------|------------------|----------|----------|---|-------|----------|----------|----------|----------|----------|----------|----------|---|
| ENSG0000 response | Inflamed | FGF17     | protein_cc chr8  | 21899909 | 21906320 | + | 3287  | 6.01432  | 0.178998 | 0.41305  | 0.171463 | 2.408979 | 0.017846 | 0.065218 | 1 |
| ENSG0000 response | Inflamed | MROH3P    | pseudoger chr1   | 2.01E+08 | 2.01E+08 | + | 2625  | 167.0859 | 0.01432  | 0.707567 | 0.293817 | 2.408193 | 0.017882 | 0.065341 | 1 |
| ENSG0000 response | Inflamed | CXCL10    | protein_cc chr4  | 76942273 | 76944650 | - | 1173  | 535.4678 | 0        | -0.86554 | 0.359473 | -2.40779 | 0.017901 | 0.0654   | 1 |
| ENSG0000 response | Inflamed | OR7E38P   | pseudoger chr7   | 97595402 | 97596386 | - | 985   | 128.3819 | 0        | -0.23317 | 0.096844 | -2.40772 | 0.017904 | 0.065402 | 1 |
| ENSG0000 response | Inflamed | RP11-244C | sense_ove chr9   | 1.25E+08 | 1.25E+08 | - | 3779  | 130.8974 | 0.002387 | 0.30848  | 0.128166 | 2.406876 | 0.017943 | 0.065536 | 1 |
| ENSG0000 response | Inflamed | FA2H      | protein_cc chr16 | 74746853 | 74808729 | - | 3010  | 2954.835 | 0        | 0.366344 | 0.152214 | 2.406761 | 0.017949 | 0.065547 | 1 |
| ENSG0000 response | Inflamed | AL133493. | lincRNA chr21    | 47013568 | 47017005 | + | 845   | 2.520286 | 0.424821 | -0.30723 | 0.1277   | -2.40589 | 0.017989 | 0.065686 | 1 |
| ENSG0000 response | Inflamed | MIR4461   | pseudoger chr5   | 1.34E+08 | 1.34E+08 | - | 297   | 6.193317 | 0.381862 | 0.371583 | 0.154454 | 2.40578  | 0.017994 | 0.065695 | 1 |
| ENSG0000 response | Inflamed | METTL6    | protein_cc chr3  | 15422782 | 15482073 | - | 5712  | 223.926  | 0        | -0.25207 | 0.104785 | -2.40562 | 0.018002 | 0.065709 | 1 |
| ENSG0000 response | Inflamed | TMEM63B   | protein_cc chr6  | 44094651 | 44123256 | + | 4425  | 3591.589 | 0        | 0.241855 | 0.100539 | 2.405578 | 0.018004 | 0.065709 | 1 |
| ENSG0000 response | Inflamed | ABCA8     | protein_cc chr17 | 66863433 | 66951533 | - | 11288 | 614.3747 | 0.004773 | 0.719488 | 0.299097 | 2.405536 | 0.018006 | 0.065709 | 1 |
| ENSG0000 response | Inflamed | GRAP2     | protein_cc chr22 | 40297086 | 40369725 | + | 6190  | 357.8878 | 0        | -0.36712 | 0.152639 | -2.40512 | 0.018025 | 0.065771 | 1 |
| ENSG0000 response | Inflamed | SLC35D3   | protein_cc chr6  | 1.37E+08 | 1.37E+08 | + | 2359  | 11.57518 | 0.124105 | 0.473069 | 0.196708 | 2.40493  | 0.018034 | 0.065791 | 1 |
| ENSG0000 response | Inflamed | GIMAP2    | protein_cc chr7  | 1.5E+08  | 1.5E+08  | + | 2097  | 353.0764 | 0        | -0.33637 | 0.139867 | -2.40489 | 0.018036 | 0.065791 | 1 |
| ENSG0000 response | Inflamed | ATRIP     | protein_cc chr3  | 48488114 | 48507115 | + | 3417  | 276.9236 | 0        | -0.19441 | 0.080842 | -2.40482 | 0.018039 | 0.065794 | 1 |
| ENSG0000 response | Inflamed | AVPR2     | protein_cc chrX  | 1.53E+08 | 1.53E+08 | + | 2231  | 42.2673  | 0.009547 | -0.48757 | 0.202801 | -2.40418 | 0.018069 | 0.065893 | 1 |
| ENSG0000 response | Inflamed | MFN2      | protein_cc chr1  | 12040238 | 12073571 | + | 4973  | 5991.94  | 0        | 0.216158 | 0.089932 | 2.403574 | 0.018097 | 0.065988 | 1 |
| ENSG0000 response | Inflamed | ZDHHC7    | protein_cc chr16 | 85007787 | 85045141 | - | 3947  | 3599.253 | 0        | 0.201841 | 0.083991 | 2.403134 | 0.018118 | 0.066053 | 1 |
| ENSG0000 response | Inflamed | CTD-2555A | lincRNA chr16    | 89112580 | 89119373 | - | 2154  | 5.190931 | 0.178998 | 0.385222 | 0.160326 | 2.402752 | 0.018135 | 0.066109 | 1 |
| ENSG0000 response | Inflamed | RP11-809C | sense_ove chr10  | 709498   | 712562   | + | 550   | 2.627685 | 0.448687 | 0.320832 | 0.133543 | 2.402457 | 0.018149 | 0.06615  | 1 |
| ENSG0000 response | Inflamed | DDB2      | protein_cc chr11 | 47236493 | 47260767 | + | 1846  | 676.2458 | 0        | -0.21503 | 0.089515 | -2.40221 | 0.018161 | 0.066184 | 1 |
| ENSG0000 response | Inflamed | GS1-204I1 | lincRNA chr1     | 1.86E+08 | 1.86E+08 | + | 901   | 6.334129 | 0.243437 | 0.525626 | 0.218815 | 2.402143 | 0.018164 | 0.066186 | 1 |
| ENSG0000 response | Inflamed | IL31RA    | protein_cc chr5  | 55147207 | 55218678 | + | 4400  | 23.69451 | 0.088305 | -0.64679 | 0.269306 | -2.40169 | 0.018185 | 0.066253 | 1 |
| ENSG0000 response | Inflamed | CTC-228N  | lincRNA chr5     | 1.27E+08 | 1.27E+08 | - | 388   | 1.0358   | 0.754177 | 0.259161 | 0.107914 | 2.401547 | 0.018192 | 0.066269 | 1 |
| ENSG0000 response | Inflamed | OTOF      | protein_cc chr2  | 26680071 | 26781566 | - | 7885  | 17.62768 | 0.0358   | -0.47125 | 0.196234 | -2.4015  | 0.018194 | 0.066269 | 1 |
| ENSG0000 response | Inflamed | ITLN1     | protein_cc chr1  | 1.61E+08 | 1.61E+08 | - | 1483  | 27697.56 | 0        | 0.924603 | 0.385061 | 2.401184 | 0.018209 | 0.066313 | 1 |
| ENSG0000 response | Inflamed | AKIRIN2   | protein_cc chr6  | 88384790 | 88411927 | - | 1999  | 1734.864 | 0        | -0.22308 | 0.092914 | -2.40097 | 0.018219 | 0.066335 | 1 |
| ENSG0000 response | Inflamed | IFI6      | protein_cc chr1  | 27992572 | 27998729 | - | 865   | 1111.764 | 0        | -0.42329 | 0.176303 | -2.40095 | 0.01822  | 0.066335 | 1 |
| ENSG0000 response | Inflamed | TSC22D4   | protein_cc chr7  | 1E+08    | 1E+08    | - | 3715  | 3161.785 | 0        | -0.19239 | 0.080132 | -2.40086 | 0.018224 | 0.066341 | 1 |
| ENSG0000 response | Inflamed | HMGB3P2   | pseudoger chr5   | 1.79E+08 | 1.79E+08 | + | 838   | 5.5179   | 0.105012 | -0.30504 | 0.127059 | -2.40077 | 0.018228 | 0.066347 | 1 |
| ENSG0000 response | Inflamed | APLP2     | protein_cc chr11 | 1.3E+08  | 1.3E+08  | + | 7444  | 20839.55 | 0        | 0.301184 | 0.125458 | 2.40068  | 0.018233 | 0.066353 | 1 |
| ENSG0000 response | Inflamed | CTD-2256F | lincRNA chr5     | 10269601 | 10270030 | - | 430   | 3.591885 | 0.355609 | 0.332864 | 0.138673 | 2.400355 | 0.018248 | 0.066392 | 1 |
| ENSG0000 response | Inflamed | RP11-13P5 | antisense chr6   | 1.6E+08  | 1.6E+08  | - | 812   | 3.677804 | 0.403341 | -0.45735 | 0.190536 | -2.40034 | 0.018249 | 0.066392 | 1 |
| ENSG0000 response | Inflamed | MTX1      | protein_cc chr1  | 1.55E+08 | 1.55E+08 | + | 3278  | 524.5227 | 0        | -0.15894 | 0.066218 | -2.40029 | 0.018251 | 0.066392 | 1 |
| ENSG0000 response | Inflamed | YARS      | protein_cc chr1  | 33240840 | 33283754 | - | 8210  | 2936.227 | 0        | -0.20263 | 0.084425 | -2.40008 | 0.018261 | 0.066418 | 1 |
| ENSG0000 response | Inflamed | CTC-428G  | antisense chr5   | 1.15E+08 | 1.15E+08 | + | 944   | 21.40334 | 0        | 0.260158 | 0.108405 | 2.399878 | 0.01827  | 0.06644  | 1 |
| ENSG0000 response | Inflamed | SUCLA2    | protein_cc chr13 | 48510622 | 48612125 | - | 3786  | 952.8496 | 0        | 0.291154 | 0.121322 | 2.399852 | 0.018272 | 0.06644  | 1 |
| ENSG0000 response | Inflamed | FBXL12    | protein_cc chr19 | 9920943  | 9938492  | - | 2913  | 895.7041 | 0        | 0.173587 | 0.072336 | 2.399721 | 0.018278 | 0.066453 | 1 |
| ENSG0000 response | Inflamed | CTB-113P1 | antisense chr5   | 1.51E+08 | 1.51E+08 | + | 1567  | 0.897375 | 0.770883 | -0.24197 | 0.100856 | -2.39922 | 0.018301 | 0.06653  | 1 |
| ENSG0000 response | Inflamed | RNF180    | protein_cc chr5  | 63461671 | 63668696 | + | 5434  | 33.77566 | 0.026253 | -0.46425 | 0.193546 | -2.39864 | 0.018329 | 0.066621 | 1 |

|                   |          |           |                  |          |          |   |       |          |          |          |          |          |          |          |   |
|-------------------|----------|-----------|------------------|----------|----------|---|-------|----------|----------|----------|----------|----------|----------|----------|---|
| ENSG0000 response | Inflamed | C1orf115  | protein_cc chr1  | 2.21E+08 | 2.21E+08 | + | 3413  | 3249.484 | 0        | 0.332001 | 0.138427 | 2.398374 | 0.018341 | 0.066656 | 1 |
| ENSG0000 response | Inflamed | RP3-439F8 | antisense chr22  | 46937392 | 46944093 | + | 2949  | 4.842482 | 0.288783 | -0.42872 | 0.178766 | -2.39823 | 0.018348 | 0.066671 | 1 |
| ENSG0000 response | Inflamed | AC023590  | protein_cc chr8  | 1.19E+08 | 1.19E+08 | + | 1617  | 8.193317 | 0.293556 | -0.58997 | 0.246006 | -2.39818 | 0.01835  | 0.066671 | 1 |
| ENSG0000 response | Inflamed | RP11-597L | pseudoger chr4   | 1.59E+08 | 1.59E+08 | + | 3616  | 26.97852 | 0.064439 | 0.616407 | 0.257046 | 2.398043 | 0.018357 | 0.066685 | 1 |
| ENSG0000 response | Inflamed | C19orf73  | protein_cc chr19 | 49621655 | 49622397 | - | 743   | 32.73508 | 0.002387 | 0.305504 | 0.127405 | 2.397898 | 0.018364 | 0.066701 | 1 |
| ENSG0000 response | Inflamed | CTD-2162L | protein_cc chr19 | 37264055 | 37267980 | + | 2050  | 3.952267 | 0.25537  | -0.3831  | 0.159772 | -2.39778 | 0.018369 | 0.066707 | 1 |
| ENSG0000 response | Inflamed | SPATA20   | protein_cc chr17 | 48620419 | 48633213 | + | 5237  | 3318.542 | 0        | 0.180533 | 0.075292 | 2.39776  | 0.01837  | 0.066707 | 1 |
| ENSG0000 response | Inflamed | RP11-666L | lincRNA chr1     | 1.49E+08 | 1.49E+08 | + | 365   | 0.856802 | 0.78043  | -0.23467 | 0.097876 | -2.39765 | 0.018375 | 0.066715 | 1 |
| ENSG0000 response | Inflamed | CCDC157   | protein_cc chr22 | 30752624 | 30774647 | + | 6586  | 113.0979 | 0        | -0.19432 | 0.08105  | -2.39756 | 0.01838  | 0.066715 | 1 |
| ENSG0000 response | Inflamed | MAGEE1    | protein_cc chrX  | 75648046 | 75651744 | + | 3699  | 65.56563 | 0.01432  | -0.42377 | 0.17675  | -2.39755 | 0.01838  | 0.066715 | 1 |
| ENSG0000 response | Inflamed | MYH7B     | protein_cc chr20 | 33563206 | 33590240 | + | 7929  | 46.62291 | 0.023866 | 0.393539 | 0.164146 | 2.397496 | 0.018383 | 0.066715 | 1 |
| ENSG0000 response | Inflamed | AC006946  | lincRNA chr22    | 17548711 | 17551565 | + | 2855  | 16.04296 | 0.081146 | -0.53393 | 0.222724 | -2.39726 | 0.018394 | 0.066746 | 1 |
| ENSG0000 response | Inflamed | MLLT4     | protein_cc chr6  | 1.68E+08 | 1.68E+08 | + | 13424 | 6402.897 | 0        | 0.385192 | 0.160689 | 2.397121 | 0.018401 | 0.066761 | 1 |
| ENSG0000 response | Inflamed | TM7SF2    | protein_cc chr11 | 64879317 | 64883856 | + | 3408  | 514.0621 | 0        | 0.262519 | 0.109528 | 2.396828 | 0.018414 | 0.066802 | 1 |
| ENSG0000 response | Inflamed | FPGS      | protein_cc chr9  | 1.31E+08 | 1.31E+08 | + | 4040  | 1848.718 | 0        | -0.21563 | 0.089969 | -2.39666 | 0.018422 | 0.066822 | 1 |
| ENSG0000 response | Inflamed | RP11-57H  | sense_intr chr1  | 95585703 | 95604110 | + | 420   | 4.002387 | 0.372315 | 0.345762 | 0.144274 | 2.396565 | 0.018427 | 0.066828 | 1 |
| ENSG0000 response | Inflamed | TSSC2     | pseudoger chr11  | 3402191  | 3430208  | + | 3666  | 50.98091 | 0.004773 | -0.46241 | 0.192953 | -2.39652 | 0.018429 | 0.066828 | 1 |
| ENSG0000 response | Inflamed | MROH1     | protein_cc chr8  | 1.45E+08 | 1.45E+08 | + | 10903 | 914.4439 | 0        | 0.198377 | 0.082793 | 2.396058 | 0.018451 | 0.066898 | 1 |
| ENSG0000 response | Inflamed | C12orf42  | protein_cc chr12 | 1.04E+08 | 1.04E+08 | - | 4863  | 7.429594 | 0.193317 | -0.39815 | 0.166179 | -2.39591 | 0.018458 | 0.066913 | 1 |
| ENSG0000 response | Inflamed | GOLGA5P1  | pseudoger chr5   | 39169312 | 39170437 | - | 980   | 1.346062 | 0.689737 | -0.30604 | 0.127739 | -2.39584 | 0.018461 | 0.066916 | 1 |
| ENSG0000 response | Inflamed | C12orf49  | protein_cc chr12 | 1.17E+08 | 1.17E+08 | - | 3061  | 2170.024 | 0        | 0.162301 | 0.067778 | 2.394611 | 0.01852  | 0.06712  | 1 |
| ENSG0000 response | Inflamed | RP11-25K1 | antisense chr8   | 60031599 | 60033905 | + | 1743  | 107.6587 | 0        | 0.231421 | 0.096646 | 2.394528 | 0.018524 | 0.067125 | 1 |
| ENSG0000 response | Inflamed | GK3P      | pseudoger chr4   | 1.66E+08 | 1.66E+08 | - | 2232  | 1.747017 | 0.596659 | -0.35184 | 0.146953 | -2.39426 | 0.018537 | 0.067157 | 1 |
| ENSG0000 response | Inflamed | AC007318  | pseudoger chr2   | 65432137 | 65433396 | + | 1260  | 27.35084 | 0        | 0.255004 | 0.106511 | 2.394146 | 0.018542 | 0.067157 | 1 |
| ENSG0000 response | Inflamed | DDOST     | protein_cc chr1  | 20978270 | 20988000 | - | 2674  | 9907.728 | 0        | -0.15644 | 0.065341 | -2.39412 | 0.018543 | 0.067157 | 1 |
| ENSG0000 response | Inflamed | AC115618  | protein_cc chrX  | 48431482 | 48433275 | - | 1794  | 4.980907 | 0.066826 | -0.25014 | 0.104483 | -2.39408 | 0.018545 | 0.067157 | 1 |
| ENSG0000 response | Inflamed | RRAS      | protein_cc chr19 | 50138549 | 50143458 | - | 1160  | 1790.699 | 0        | -0.21546 | 0.089995 | -2.39407 | 0.018546 | 0.067157 | 1 |
| ENSG0000 response | Inflamed | CDK9      | protein_cc chr9  | 1.31E+08 | 1.31E+08 | + | 3000  | 2225.382 | 0        | -0.16947 | 0.070794 | -2.39382 | 0.018558 | 0.067192 | 1 |
| ENSG0000 response | Inflamed | RP11-809L | pseudoger chr11  | 73221703 | 73221865 | + | 163   | 103.148  | 0.019093 | 0.470213 | 0.196445 | 2.393617 | 0.018567 | 0.067218 | 1 |
| ENSG0000 response | Inflamed | NMT1      | protein_cc chr17 | 43128978 | 43186384 | + | 6669  | 3749.721 | 0        | -0.18722 | 0.07823  | -2.39325 | 0.018585 | 0.067272 | 1 |
| ENSG0000 response | Inflamed | FAM43B    | protein_cc chr1  | 20878932 | 20881512 | + | 2581  | 9.031026 | 0.140811 | -0.5519  | 0.230633 | -2.39299 | 0.018597 | 0.067308 | 1 |
| ENSG0000 response | Inflamed | SLC6A18   | protein_cc chr5  | 1225470  | 1246304  | + | 2125  | 3.288783 | 0.536993 | 0.354668 | 0.148228 | 2.392728 | 0.01861  | 0.067344 | 1 |
| ENSG0000 response | Inflamed | TEF       | protein_cc chr22 | 41763337 | 41795330 | + | 4715  | 2173.337 | 0        | 0.353533 | 0.147758 | 2.392653 | 0.018613 | 0.067347 | 1 |
| ENSG0000 response | Inflamed | OTUD5     | protein_cc chrX  | 48779305 | 48815648 | - | 3329  | 3011.687 | 0        | -0.15026 | 0.062807 | -2.39235 | 0.018628 | 0.067391 | 1 |
| ENSG0000 response | Inflamed | CYP4F8    | processed_chr19  | 15726029 | 15741448 | + | 7047  | 2.205251 | 0.637232 | 0.33278  | 0.139106 | 2.392281 | 0.018631 | 0.067392 | 1 |
| ENSG0000 response | Inflamed | ZNF267    | protein_cc chr16 | 31885079 | 31928668 | + | 6323  | 346.9045 | 0        | -0.41889 | 0.175105 | -2.39224 | 0.018633 | 0.067392 | 1 |
| ENSG0000 response | Inflamed | MRPL27    | protein_cc chr17 | 48445218 | 48450575 | - | 3027  | 940.432  | 0        | 0.208232 | 0.087051 | 2.39208  | 0.018641 | 0.06741  | 1 |
| ENSG0000 response | Inflamed | SIAH2     | protein_cc chr3  | 1.5E+08  | 1.5E+08  | - | 2617  | 1566.019 | 0        | -0.14215 | 0.05943  | -2.39184 | 0.018652 | 0.067442 | 1 |
| ENSG0000 response | Inflamed | JMJD6     | protein_cc chr17 | 74708919 | 74722866 | - | 5949  | 1020.668 | 0        | -0.16249 | 0.067959 | -2.39094 | 0.018696 | 0.067589 | 1 |
| ENSG0000 response | Inflamed | DYNLL2    | protein_cc chr17 | 56160776 | 56172897 | + | 6805  | 5741.415 | 0        | 0.220255 | 0.092147 | 2.390256 | 0.018728 | 0.067699 | 1 |

|                   |          |           |                  |          |          |   |       |          |          |          |          |          |          |          |   |
|-------------------|----------|-----------|------------------|----------|----------|---|-------|----------|----------|----------|----------|----------|----------|----------|---|
| ENSG0000 response | Inflamed | FAM221A   | protein_cc chr7  | 23719749 | 23742868 | + | 7458  | 288.4177 | 0        | 0.466071 | 0.194998 | 2.39013  | 0.018735 | 0.067711 | 1 |
| ENSG0000 response | Inflamed | CRYM-AS1  | lincRNA chr16    | 21312170 | 21329912 | + | 2515  | 13.36754 | 0.062053 | 0.436549 | 0.182651 | 2.390069 | 0.018737 | 0.067712 | 1 |
| ENSG0000 response | Inflamed | CTD-2127f | lincRNA chr5     | 38736157 | 38845931 | - | 1319  | 3.026253 | 0.350835 | -0.3559  | 0.148914 | -2.39    | 0.018741 | 0.067715 | 1 |
| ENSG0000 response | Inflamed | SORBS3    | protein_cc chr8  | 22402499 | 22433301 | + | 6110  | 3242.993 | 0        | 0.300412 | 0.125698 | 2.389948 | 0.018743 | 0.067715 | 1 |
| ENSG0000 response | Inflamed | RP11-73K9 | lincRNA chr4     | 1.13E+08 | 1.13E+08 | - | 349   | 2.899761 | 0.353222 | -0.34153 | 0.142909 | -2.38984 | 0.018749 | 0.067725 | 1 |
| ENSG0000 response | Inflamed | DYNC1I1   | protein_cc chr7  | 95401866 | 95739634 | + | 4520  | 15.02625 | 0.023866 | -0.42891 | 0.179482 | -2.38971 | 0.018755 | 0.067738 | 1 |
| ENSG0000 response | Inflamed | RP11-112f | antisense chr17  | 56597198 | 56634338 | + | 1575  | 28.00955 | 0.00716  | -0.38744 | 0.162146 | -2.38945 | 0.018767 | 0.067773 | 1 |
| ENSG0000 response | Inflamed | GDF7      | protein_cc chr2  | 20866424 | 20873418 | + | 4162  | 38.95465 | 0.023866 | -0.56247 | 0.235407 | -2.38936 | 0.018772 | 0.067778 | 1 |
| ENSG0000 response | Inflamed | AC007879  | lincRNA chr2     | 2.08E+08 | 2.08E+08 | - | 1095  | 5        | 0.183771 | -0.38311 | 0.16035  | -2.38921 | 0.018779 | 0.067797 | 1 |
| ENSG0000 response | Inflamed | TCF25     | protein_cc chr16 | 89940000 | 89977792 | + | 5995  | 5074.153 | 0        | -0.1204  | 0.050397 | -2.38906 | 0.018786 | 0.067807 | 1 |
| ENSG0000 response | Inflamed | DCBLD1    | protein_cc chr6  | 1.18E+08 | 1.18E+08 | + | 6819  | 1065.656 | 0        | -0.3782  | 0.158305 | -2.38905 | 0.018787 | 0.067807 | 1 |
| ENSG0000 response | Inflamed | UNKL      | protein_cc chr16 | 1413206  | 1464752  | - | 8504  | 859.4248 | 0        | -0.32695 | 0.136876 | -2.38867 | 0.018805 | 0.067862 | 1 |
| ENSG0000 response | Inflamed | NUP62     | protein_cc chr19 | 50410082 | 50433020 | - | 6020  | 2863.196 | 0        | -0.21214 | 0.088817 | -2.38849 | 0.018814 | 0.067878 | 1 |
| ENSG0000 response | Inflamed | FAM220A   | protein_cc chr7  | 6369040  | 6388612  | - | 2395  | 355.7566 | 0        | -0.19129 | 0.080089 | -2.38847 | 0.018814 | 0.067878 | 1 |
| ENSG0000 response | Inflamed | RAC1      | protein_cc chr7  | 6414154  | 6443608  | + | 3114  | 14665.37 | 0        | 0.173    | 0.072452 | 2.38778  | 0.018848 | 0.06799  | 1 |
| ENSG0000 response | Inflamed | ZNF691    | protein_cc chr1  | 43312280 | 43318148 | + | 2141  | 256.3126 | 0        | -0.18986 | 0.079514 | -2.38772 | 0.018851 | 0.067991 | 1 |
| ENSG0000 response | Inflamed | OVCH1     | protein_cc chr12 | 29565407 | 29650619 | - | 3958  | 2.147971 | 0.513126 | -0.30558 | 0.127982 | -2.38767 | 0.018853 | 0.067991 | 1 |
| ENSG0000 response | Inflamed | DENND5B   | protein_cc chr12 | 31535157 | 31744031 | - | 11310 | 821.3437 | 0        | -0.44895 | 0.188034 | -2.38761 | 0.018856 | 0.067992 | 1 |
| ENSG0000 response | Inflamed | AF121897  | pseudoger chr21  | 40897510 | 40901782 | + | 3980  | 1.658711 | 0.577566 | 0.31288  | 0.13105  | 2.387477 | 0.018863 | 0.068006 | 1 |
| ENSG0000 response | Inflamed | TXN2      | protein_cc chr22 | 36863083 | 36878077 | - | 2050  | 2906.449 | 0        | 0.182486 | 0.076441 | 2.387286 | 0.018872 | 0.06803  | 1 |
| ENSG0000 response | Inflamed | TWF1P1    | pseudoger chr17  | 27530441 | 27531492 | - | 1052  | 7.155131 | 0.076372 | 0.368446 | 0.154346 | 2.387138 | 0.018879 | 0.068047 | 1 |
| ENSG0000 response | Inflamed | TMEM119   | protein_cc chr12 | 1.09E+08 | 1.09E+08 | - | 3189  | 2386.308 | 0        | -0.4328  | 0.18132  | -2.38691 | 0.01889  | 0.068077 | 1 |
| ENSG0000 response | Inflamed | TMEM208   | protein_cc chr16 | 67261006 | 67263181 | + | 1787  | 915.9021 | 0        | -0.24017 | 0.100625 | -2.38683 | 0.018894 | 0.068078 | 1 |
| ENSG0000 response | Inflamed | C1orf54   | protein_cc chr1  | 1.5E+08  | 1.5E+08  | + | 1351  | 193.7852 | 0        | -0.29309 | 0.122795 | -2.3868  | 0.018896 | 0.068078 | 1 |
| ENSG0000 response | Inflamed | GPR155    | protein_cc chr2  | 1.75E+08 | 1.75E+08 | - | 7102  | 388.5656 | 0        | -0.45921 | 0.192409 | -2.38662 | 0.018904 | 0.068099 | 1 |
| ENSG0000 response | Inflamed | NTMT1     | protein_cc chr9  | 1.32E+08 | 1.32E+08 | + | 2674  | 678.2458 | 0        | -0.17156 | 0.071893 | -2.3863  | 0.01892  | 0.068147 | 1 |
| ENSG0000 response | Inflamed | NPHS1     | protein_cc chr19 | 36316866 | 36360189 | - | 5459  | 43.66348 | 0.124105 | -0.97258 | 0.407622 | -2.386   | 0.018935 | 0.06819  | 1 |
| ENSG0000 response | Inflamed | ACOX2     | protein_cc chr3  | 58490863 | 58523046 | - | 3859  | 430.7637 | 0        | 0.375887 | 0.157546 | 2.385883 | 0.01894  | 0.068193 | 1 |
| ENSG0000 response | Inflamed | MCC       | protein_cc chr5  | 1.12E+08 | 1.13E+08 | - | 31750 | 780.494  | 0        | -0.48494 | 0.203255 | -2.38587 | 0.018941 | 0.068193 | 1 |
| ENSG0000 response | Inflamed | RP11-61A1 | lincRNA chr16    | 66785655 | 66788643 | + | 2894  | 9.031026 | 0.069212 | 0.369551 | 0.154919 | 2.385445 | 0.018961 | 0.068259 | 1 |
| ENSG0000 response | Inflamed | CCND2     | protein_cc chr12 | 4382938  | 4414516  | + | 7157  | 5239.492 | 0        | -0.32054 | 0.134384 | -2.38527 | 0.01897  | 0.06828  | 1 |
| ENSG0000 response | Inflamed | SAA4      | protein_cc chr11 | 18252896 | 18258440 | - | 727   | 8.847255 | 0.463007 | -0.70134 | 0.294055 | -2.38507 | 0.01898  | 0.068307 | 1 |
| ENSG0000 response | Inflamed | ZNF675    | protein_cc chr19 | 23708433 | 23870022 | - | 6785  | 237.6086 | 0        | 0.418545 | 0.175513 | 2.384695 | 0.018998 | 0.068362 | 1 |
| ENSG0000 response | Inflamed | C17orf76  | processed_chr17  | 16342136 | 16381992 | + | 3759  | 6501.828 | 0        | 0.246345 | 0.103307 | 2.38459  | 0.019003 | 0.068371 | 1 |
| ENSG0000 response | Inflamed | SLC6A20   | protein_cc chr3  | 45796942 | 45838027 | - | 6651  | 962.716  | 0        | -0.84908 | 0.356106 | -2.38435 | 0.019015 | 0.068389 | 1 |
| ENSG0000 response | Inflamed | SLC13A3   | protein_cc chr20 | 45186463 | 45304714 | - | 5982  | 21.86158 | 0.019093 | -0.39951 | 0.167555 | -2.38434 | 0.019015 | 0.068389 | 1 |
| ENSG0000 response | Inflamed | NET1      | protein_cc chr10 | 5454514  | 5500426  | + | 4194  | 4350.234 | 0        | 0.424834 | 0.178178 | 2.384328 | 0.019016 | 0.068389 | 1 |
| ENSG0000 response | Inflamed | ASPN      | protein_cc chr9  | 95218487 | 95244788 | - | 2487  | 193.222  | 0        | -0.6306  | 0.264487 | -2.38423 | 0.019021 | 0.068397 | 1 |
| ENSG0000 response | Inflamed | NOD1      | protein_cc chr7  | 30464143 | 30518400 | - | 6820  | 764.7995 | 0        | -0.24118 | 0.101167 | -2.38397 | 0.019033 | 0.068433 | 1 |
| ENSG0000 response | Inflamed | AC005550  | antisense chr7   | 15707572 | 15721605 | + | 3743  | 56.93556 | 0.016706 | 0.637877 | 0.267601 | 2.38369  | 0.019047 | 0.068473 | 1 |



|                   |          |           |            |       |          |          |   |       |          |          |          |          |          |          |          |   |
|-------------------|----------|-----------|------------|-------|----------|----------|---|-------|----------|----------|----------|----------|----------|----------|----------|---|
| ENSG0000 response | Inflamed | AC009299  | lincRNA    | chr2  | 1.62E+08 | 1.62E+08 | + | 2377  | 49.18854 | 0        | 0.296158 | 0.124261 | 2.383364 | 0.019063 | 0.068513 | 1 |
| ENSG0000 response | Inflamed | NNT       | protein_cc | chr5  | 43602794 | 43707507 | + | 8245  | 2477.217 | 0        | 0.330967 | 0.138866 | 2.383356 | 0.019063 | 0.068513 | 1 |
| ENSG0000 response | Inflamed | GNG7      | protein_cc | chr19 | 2511217  | 2702707  | - | 4561  | 767.7303 | 0        | -0.44139 | 0.185216 | -2.38309 | 0.019076 | 0.068551 | 1 |
| ENSG0000 response | Inflamed | RORA      | protein_cc | chr15 | 60780483 | 61521518 | - | 17033 | 341.5418 | 0        | -0.52523 | 0.220431 | -2.38275 | 0.019093 | 0.0686   | 1 |
| ENSG0000 response | Inflamed | AC104653  | lincRNA    | chr2  | 1.15E+08 | 1.15E+08 | - | 671   | 4.121718 | 0.26253  | -0.39417 | 0.165429 | -2.3827  | 0.019095 | 0.0686   | 1 |
| ENSG0000 response | Inflamed | BUB1      | protein_cc | chr2  | 1.11E+08 | 1.11E+08 | - | 6032  | 430.5632 | 0        | -0.43003 | 0.180515 | -2.38223 | 0.019118 | 0.068673 | 1 |
| ENSG0000 response | Inflamed | PI4KAP1   | pseudoger  | chr22 | 20383524 | 20427835 | - | 4808  | 431.8067 | 0        | 0.481356 | 0.202069 | 2.382132 | 0.019123 | 0.068681 | 1 |
| ENSG0000 response | Inflamed | AL132709  | lincRNA    | chr14 | 1.01E+08 | 1.01E+08 | + | 2986  | 3.243437 | 0.384248 | -0.39958 | 0.167759 | -2.38188 | 0.019135 | 0.068715 | 1 |
| ENSG0000 response | Inflamed | RP11-133C | antisense  | chr9  | 33785948 | 33818793 | - | 647   | 0.809069 | 0.778043 | -0.23078 | 0.096894 | -2.38184 | 0.019138 | 0.068715 | 1 |
| ENSG0000 response | Inflamed | SHROOM4   | protein_cc | chrX  | 50334647 | 50557302 | - | 10333 | 642.7542 | 0        | -0.39559 | 0.166114 | -2.38146 | 0.019156 | 0.068772 | 1 |
| ENSG0000 response | Inflamed | NPB       | protein_cc | chr17 | 79858621 | 79860781 | + | 2161  | 13.99284 | 0.019093 | -0.41066 | 0.172454 | -2.38127 | 0.019165 | 0.068795 | 1 |
| ENSG0000 response | Inflamed | ZDHHC19   | protein_cc | chr3  | 1.96E+08 | 1.96E+08 | - | 2432  | 20.1074  | 0.011933 | -0.46627 | 0.195841 | -2.38086 | 0.019186 | 0.068859 | 1 |
| ENSG0000 response | Inflamed | AC098820  | antisense  | chr2  | 2.17E+08 | 2.17E+08 | - | 976   | 1.933174 | 0.501193 | -0.28139 | 0.118193 | -2.38076 | 0.01919  | 0.068866 | 1 |
| ENSG0000 response | Inflamed | SERINC4   | protein_cc | chr15 | 44086360 | 44092419 | - | 2977  | 13.27446 | 0.02864  | 0.339123 | 0.142456 | 2.38055  | 0.019201 | 0.068895 | 1 |
| ENSG0000 response | Inflamed | CCDC26    | lincRNA    | chr8  | 1.3E+08  | 1.31E+08 | - | 2035  | 1        | 0.749403 | -0.23243 | 0.097679 | -2.37953 | 0.019251 | 0.069066 | 1 |
| ENSG0000 response | Inflamed | HAO2      | protein_cc | chr1  | 1.2E+08  | 1.2E+08  | + | 1877  | 1.916468 | 0.589499 | -0.36121 | 0.151825 | -2.37914 | 0.019271 | 0.069126 | 1 |
| ENSG0000 response | Inflamed | AC004009  | lincRNA    | chr7  | 27401462 | 27449557 | + | 567   | 2.131265 | 0.551313 | -0.37932 | 0.159445 | -2.37899 | 0.019278 | 0.069142 | 1 |
| ENSG0000 response | Inflamed | TEX2      | protein_cc | chr17 | 62224587 | 62340661 | - | 9094  | 1866.888 | 0        | 0.29827  | 0.125385 | 2.378841 | 0.019285 | 0.069159 | 1 |
| ENSG0000 response | Inflamed | ABR       | protein_cc | chr17 | 906758   | 1132315  | - | 11709 | 12144.74 | 0        | 0.243813 | 0.1025   | 2.378665 | 0.019294 | 0.069181 | 1 |
| ENSG0000 response | Inflamed | LINC00664 | lincRNA    | chr19 | 21666176 | 21686040 | + | 5889  | 9.539379 | 0.181384 | -0.544   | 0.228728 | -2.37836 | 0.019309 | 0.069217 | 1 |
| ENSG0000 response | Inflamed | RP11-643C | pseudoger  | chr14 | 68081646 | 68083343 | + | 1698  | 0.99284  | 0.74463  | -0.23347 | 0.098166 | -2.37835 | 0.019309 | 0.069217 | 1 |
| ENSG0000 response | Inflamed | PTPRK     | protein_cc | chr6  | 1.28E+08 | 1.29E+08 | - | 9066  | 3828.862 | 0        | 0.31821  | 0.133801 | 2.378231 | 0.019315 | 0.06923  | 1 |
| ENSG0000 response | Inflamed | AL122127  | miRNA      | chr14 | 1.06E+08 | 1.06E+08 | - | 67    | 75.40573 | 0.042959 | -0.69194 | 0.290958 | -2.37816 | 0.019319 | 0.069234 | 1 |
| ENSG0000 response | Inflamed | RP11-982M | antisense  | chr14 | 1.05E+08 | 1.05E+08 | - | 716   | 0.983294 | 0.749403 | 0.184818 | 0.077726 | 2.377814 | 0.019336 | 0.069285 | 1 |
| ENSG0000 response | Inflamed | RP11-569A | antisense  | chr1  | 2.03E+08 | 2.03E+08 | + | 314   | 8.217184 | 0.133652 | 0.439155 | 0.184698 | 2.37769  | 0.019342 | 0.069297 | 1 |
| ENSG0000 response | Inflamed | RP11-834C | lincRNA    | chr12 | 54519882 | 54526627 | + | 1369  | 83.69451 | 0.002387 | -0.36662 | 0.154196 | -2.37762 | 0.019346 | 0.0693   | 1 |
| ENSG0000 response | Inflamed | AC093620  | antisense  | chr7  | 5459458  | 5460398  | + | 583   | 6.362768 | 0.100239 | 0.351736 | 0.147945 | 2.377478 | 0.019353 | 0.069316 | 1 |
| ENSG0000 response | Inflamed | CCDC60    | protein_cc | chr12 | 1.2E+08  | 1.2E+08  | + | 3440  | 58.22434 | 0.026253 | 0.570229 | 0.239858 | 2.377364 | 0.019358 | 0.069327 | 1 |
| ENSG0000 response | Inflamed | PIGS      | protein_cc | chr17 | 26880401 | 26898890 | - | 5990  | 3445.773 | 0        | 0.187822 | 0.079011 | 2.377162 | 0.019368 | 0.069353 | 1 |
| ENSG0000 response | Inflamed | OLIG2     | protein_cc | chr21 | 34398153 | 34401504 | + | 3352  | 25.35561 | 0.064439 | -0.59589 | 0.250699 | -2.37691 | 0.019381 | 0.06938  | 1 |
| ENSG0000 response | Inflamed | PARP1     | protein_cc | chr1  | 2.27E+08 | 2.27E+08 | - | 7169  | 5057.317 | 0        | -0.31703 | 0.13338  | -2.3769  | 0.019381 | 0.06938  | 1 |
| ENSG0000 response | Inflamed | GBAS      | protein_cc | chr7  | 56019486 | 56067874 | + | 5651  | 1190.757 | 0        | 0.308667 | 0.129864 | 2.376852 | 0.019384 | 0.06938  | 1 |
| ENSG0000 response | Inflamed | NPFFR1    | protein_cc | chr10 | 72007085 | 72043432 | - | 8921  | 53.57995 | 0.040573 | -0.55245 | 0.23245  | -2.37664 | 0.019394 | 0.069408 | 1 |
| ENSG0000 response | Inflamed | ZDHHC11   | protein_cc | chr5  | 710471   | 851101   | - | 7267  | 74.59189 | 0.02148  | 0.594506 | 0.250171 | 2.376396 | 0.019406 | 0.069434 | 1 |
| ENSG0000 response | Inflamed | CDC42EP4  | protein_cc | chr17 | 71279763 | 71308314 | - | 5007  | 4067.726 | 0        | 0.227966 | 0.09593  | 2.376388 | 0.019407 | 0.069434 | 1 |
| ENSG0000 response | Inflamed | GOLGA2B   | pseudoger  | chr12 | 1.01E+08 | 1.01E+08 | - | 10957 | 938.642  | 0        | 0.62567  | 0.263293 | 2.376327 | 0.01941  | 0.069436 | 1 |
| ENSG0000 response | Inflamed | XPNPEP1   | protein_cc | chr10 | 1.12E+08 | 1.12E+08 | - | 6691  | 3072.945 | 0        | 0.256651 | 0.108006 | 2.376258 | 0.019413 | 0.069438 | 1 |
| ENSG0000 response | Inflamed | TYRO3     | protein_cc | chr15 | 41849873 | 41871536 | + | 6697  | 285.8258 | 0        | -0.33289 | 0.140105 | -2.376   | 0.019426 | 0.06947  | 1 |
| ENSG0000 response | Inflamed | AC009133  | antisense  | chr16 | 29820250 | 29831687 | - | 589   | 47.78998 | 0.002387 | 0.398055 | 0.167533 | 2.375977 | 0.019427 | 0.06947  | 1 |
| ENSG0000 response | Inflamed | CHMP7     | protein_cc | chr8  | 23101150 | 23119512 | + | 4532  | 2112.967 | 0        | -0.15469 | 0.065109 | -2.37592 | 0.01943  | 0.069471 | 1 |

|                   |          |           |                  |          |          |   |       |          |          |          |          |          |          |          |   |
|-------------------|----------|-----------|------------------|----------|----------|---|-------|----------|----------|----------|----------|----------|----------|----------|---|
| ENSG0000 response | Inflamed | PZP       | protein_cc chr12 | 9301436  | 9360966  | - | 6227  | 4.618138 | 0.236277 | -0.44645 | 0.187934 | -2.37556 | 0.019448 | 0.069525 | 1 |
| ENSG0000 response | Inflamed | TRAM1     | protein_cc chr8  | 71485677 | 71520622 | - | 3878  | 4262.52  | 0        | -0.35094 | 0.147736 | -2.37544 | 0.019454 | 0.069536 | 1 |
| ENSG0000 response | Inflamed | AC074212  | antisense chr19  | 46268043 | 46273064 | + | 2600  | 151.9165 | 0        | -0.42056 | 0.177058 | -2.37527 | 0.019462 | 0.069558 | 1 |
| ENSG0000 response | Inflamed | TRAV13-1  | TR_V_gene chr14  | 22337020 | 22337546 | + | 360   | 21.25537 | 0.0358   | -0.43221 | 0.181982 | -2.37503 | 0.019474 | 0.06959  | 1 |
| ENSG0000 response | Inflamed | C1orf74   | protein_cc chr1  | 2.1E+08  | 2.1E+08  | - | 1576  | 117.7542 | 0        | 0.234391 | 0.098692 | 2.374971 | 0.019477 | 0.069592 | 1 |
| ENSG0000 response | Inflamed | FAM170B   | protein_cc chr10 | 50339199 | 50342053 | - | 1401  | 0.937947 | 0.763723 | -0.25156 | 0.105927 | -2.37484 | 0.019484 | 0.069607 | 1 |
| ENSG0000 response | Inflamed | RP11-89H1 | antisense chr12  | 48276432 | 48295308 | + | 1287  | 2.591885 | 0.374702 | -0.32383 | 0.136367 | -2.37466 | 0.019493 | 0.069628 | 1 |
| ENSG0000 response | Inflamed | PRNP      | protein_cc chr20 | 4666882  | 4682236  | + | 2851  | 2134.076 | 0        | -0.38188 | 0.160845 | -2.37424 | 0.019514 | 0.069695 | 1 |
| ENSG0000 response | Inflamed | LGALS17A  | pseudogene chr19 | 40170014 | 40177013 | + | 2773  | 6.823389 | 0.346062 | -0.54115 | 0.227962 | -2.37387 | 0.019532 | 0.069751 | 1 |
| ENSG0000 response | Inflamed | GIMAP7    | protein_cc chr7  | 1.5E+08  | 1.5E+08  | + | 1256  | 431.0119 | 0        | -0.44138 | 0.185964 | -2.37349 | 0.019551 | 0.069809 | 1 |
| ENSG0000 response | Inflamed | TRIM2     | protein_cc chr4  | 1.54E+08 | 1.54E+08 | + | 9333  | 2835.131 | 0        | 0.472177 | 0.19897  | 2.373102 | 0.019571 | 0.069866 | 1 |
| ENSG0000 response | Inflamed | ATP2B4    | protein_cc chr1  | 2.04E+08 | 2.04E+08 | + | 9721  | 3961.057 | 0        | -0.39903 | 0.168148 | -2.37306 | 0.019573 | 0.069866 | 1 |
| ENSG0000 response | Inflamed | EIF3LP3   | pseudogene chr10 | 38368984 | 38369805 | - | 822   | 2.911695 | 0.355609 | 0.278685 | 0.11744  | 2.372996 | 0.019576 | 0.069868 | 1 |
| ENSG0000 response | Inflamed | C17orf53  | protein_cc chr17 | 42219274 | 42239844 | + | 3005  | 124.6516 | 0        | -0.2978  | 0.125499 | -2.37294 | 0.019579 | 0.069868 | 1 |
| ENSG0000 response | Inflamed | RP11-727F | antisense chr11  | 62599706 | 62601515 | + | 765   | 11.90931 | 0.019093 | -0.30389 | 0.128071 | -2.37281 | 0.019585 | 0.069883 | 1 |
| ENSG0000 response | Inflamed | PRB3      | protein_cc chr12 | 11418857 | 11422739 | - | 1387  | 1.109785 | 0.718377 | 0.246545 | 0.103914 | 2.372589 | 0.019596 | 0.069913 | 1 |
| ENSG0000 response | Inflamed | RP11-572C | lincRNA chr3     | 1.12E+08 | 1.12E+08 | - | 5109  | 296.0883 | 0        | -0.66296 | 0.279463 | -2.37227 | 0.019612 | 0.069955 | 1 |
| ENSG0000 response | Inflamed | ARFGAP3   | protein_cc chr22 | 43192508 | 43254112 | - | 3381  | 2192.253 | 0        | -0.38676 | 0.163038 | -2.37221 | 0.019615 | 0.069955 | 1 |
| ENSG0000 response | Inflamed | GGH       | protein_cc chr8  | 63927638 | 63951730 | - | 3130  | 920.9618 | 0        | 0.321242 | 0.135421 | 2.372166 | 0.019618 | 0.069955 | 1 |
| ENSG0000 response | Inflamed | CXADR     | protein_cc chr21 | 18884700 | 18965897 | + | 6682  | 1366.074 | 0.002387 | 0.610377 | 0.25731  | 2.372142 | 0.019619 | 0.069955 | 1 |
| ENSG0000 response | Inflamed | MB21D2    | protein_cc chr3  | 1.93E+08 | 1.93E+08 | - | 3368  | 261.8592 | 0        | -0.29175 | 0.123025 | -2.3715  | 0.019651 | 0.070056 | 1 |
| ENSG0000 response | Inflamed | ACOT4     | protein_cc chr14 | 74058410 | 74063200 | + | 2362  | 144.3604 | 0        | 0.326415 | 0.137642 | 2.371469 | 0.019652 | 0.070056 | 1 |
| ENSG0000 response | Inflamed | SLC2A5    | protein_cc chr1  | 9095166  | 9148537  | - | 6854  | 459.4368 | 0        | -0.40289 | 0.169927 | -2.37094 | 0.019679 | 0.070141 | 1 |
| ENSG0000 response | Inflamed | NAT1      | protein_cc chr8  | 18027986 | 18081198 | + | 3173  | 569.7566 | 0        | 0.421192 | 0.177683 | 2.370467 | 0.019703 | 0.070217 | 1 |
| ENSG0000 response | Inflamed | PLLP      | protein_cc chr16 | 57290004 | 57318599 | - | 1620  | 578.3174 | 0        | 0.548697 | 0.231518 | 2.369998 | 0.019727 | 0.070291 | 1 |
| ENSG0000 response | Inflamed | BPNT1     | protein_cc chr1  | 2.2E+08  | 2.2E+08  | - | 3115  | 1526.05  | 0        | 0.286094 | 0.120764 | 2.369024 | 0.019776 | 0.070457 | 1 |
| ENSG0000 response | Inflamed | KIAA0226  | protein_cc chr3  | 1.97E+08 | 1.97E+08 | - | 8613  | 1933.94  | 0        | -0.2443  | 0.103125 | -2.36892 | 0.019781 | 0.070466 | 1 |
| ENSG0000 response | Inflamed | AC012065  | lincRNA chr2     | 20877569 | 20879005 | + | 1437  | 29.20286 | 0.040573 | -0.51633 | 0.217991 | -2.36859 | 0.019798 | 0.070516 | 1 |
| ENSG0000 response | Inflamed | FKBP14    | protein_cc chr7  | 30050203 | 30066300 | - | 5326  | 384.0143 | 0        | -0.49346 | 0.208351 | -2.36843 | 0.019806 | 0.070536 | 1 |
| ENSG0000 response | Inflamed | BCL2L15   | protein_cc chr1  | 1.14E+08 | 1.14E+08 | - | 4251  | 2417.747 | 0        | 0.521159 | 0.220055 | 2.368311 | 0.019812 | 0.070547 | 1 |
| ENSG0000 response | Inflamed | RP11-70P1 | lincRNA chr1     | 25907969 | 25916847 | + | 483   | 6.042959 | 0.066826 | -0.30039 | 0.126876 | -2.36763 | 0.019846 | 0.070654 | 1 |
| ENSG0000 response | Inflamed | DSP       | protein_cc chr6  | 7541808  | 7586950  | + | 10093 | 13356.16 | 0        | 0.529218 | 0.223524 | 2.367613 | 0.019847 | 0.070654 | 1 |
| ENSG0000 response | Inflamed | NAT8      | protein_cc chr2  | 73867959 | 73869520 | - | 947   | 7.494033 | 0.615752 | 0.395846 | 0.167242 | 2.366904 | 0.019883 | 0.070772 | 1 |
| ENSG0000 response | Inflamed | USMG5     | protein_cc chr10 | 1.05E+08 | 1.05E+08 | - | 898   | 1780.346 | 0        | 0.316788 | 0.133919 | 2.365508 | 0.019954 | 0.071015 | 1 |
| ENSG0000 response | Inflamed | KB-1125A3 | antisense chr22  | 24198614 | 24199226 | - | 613   | 2.933174 | 0.348449 | -0.32848 | 0.138898 | -2.36488 | 0.019986 | 0.071112 | 1 |
| ENSG0000 response | Inflamed | PCDHB12   | protein_cc chr5  | 1.41E+08 | 1.41E+08 | + | 3428  | 30.92363 | 0.026253 | -0.37305 | 0.157755 | -2.36472 | 0.019994 | 0.071139 | 1 |
| ENSG0000 response | Inflamed | RP11-798k | lincRNA chr15    | 67278699 | 67351591 | - | 1015  | 6.427208 | 0.570406 | 0.434625 | 0.183816 | 2.364465 | 0.020007 | 0.071161 | 1 |
| ENSG0000 response | Inflamed | TPSB2     | polymorph chr16  | 1277272  | 1280214  | - | 1558  | 1684.513 | 0        | -0.48668 | 0.205838 | -2.3644  | 0.02001  | 0.071161 | 1 |
| ENSG0000 response | Inflamed | SOX12     | protein_cc chr20 | 306207   | 310865   | + | 4659  | 522.0883 | 0        | -0.35907 | 0.151865 | -2.3644  | 0.020011 | 0.071161 | 1 |
| ENSG0000 response | Inflamed | ABCD3     | protein_cc chr1  | 94883933 | 94984222 | + | 7669  | 2242.644 | 0        | 0.425823 | 0.180099 | 2.364387 | 0.020011 | 0.071161 | 1 |

|                   |          |           |                  |          |          |   |       |          |          |          |          |          |          |          |   |
|-------------------|----------|-----------|------------------|----------|----------|---|-------|----------|----------|----------|----------|----------|----------|----------|---|
| ENSG0000 response | Inflamed | SLC25A19  | protein_cc chr17 | 73269073 | 73285591 | - | 3305  | 450.5251 | 0        | -0.1874  | 0.079269 | -2.36416 | 0.020023 | 0.071192 | 1 |
| ENSG0000 response | Inflamed | RABL6     | protein_cc chr9  | 1.4E+08  | 1.4E+08  | + | 10924 | 5705.554 | 0        | 0.185686 | 0.078547 | 2.364006 | 0.020031 | 0.071211 | 1 |
| ENSG0000 response | Inflamed | RP11-523C | lincRNA chr3     | 1.76E+08 | 1.76E+08 | + | 789   | 7.429594 | 0.186158 | 0.436597 | 0.184697 | 2.363852 | 0.020039 | 0.071229 | 1 |
| ENSG0000 response | Inflamed | VASH2     | protein_cc chr1  | 2.13E+08 | 2.13E+08 | + | 6950  | 57.25298 | 0.023866 | -0.61951 | 0.262095 | -2.36368 | 0.020047 | 0.071251 | 1 |
| ENSG0000 response | Inflamed | RP11-392E | pseudoger chr9   | 38543101 | 38543443 | - | 343   | 14.70644 | 0.102625 | 0.518981 | 0.21958  | 2.363521 | 0.020055 | 0.07127  | 1 |
| ENSG0000 response | Inflamed | RP11-282k | sense_intr chr12 | 19300008 | 19307593 | + | 5391  | 6.183771 | 0.124105 | 0.380296 | 0.160919 | 2.363272 | 0.020068 | 0.071306 | 1 |
| ENSG0000 response | Inflamed | DHDH      | protein_cc chr19 | 49436939 | 49448226 | + | 1081  | 26.04535 | 0.064439 | 0.491643 | 0.20809  | 2.362642 | 0.0201   | 0.071411 | 1 |
| ENSG0000 response | Inflamed | NDUFS2    | protein_cc chr1  | 1.61E+08 | 1.61E+08 | + | 3997  | 4278.692 | 0        | 0.192047 | 0.081288 | 2.362557 | 0.020105 | 0.071417 | 1 |
| ENSG0000 response | Inflamed | TPRKBP2   | pseudoger chr16  | 28122494 | 28122968 | - | 475   | 0.885442 | 0.77327  | -0.23732 | 0.100476 | -2.36195 | 0.020136 | 0.071518 | 1 |
| ENSG0000 response | Inflamed | GLIS3     | protein_cc chr9  | 3824127  | 4348392  | - | 11558 | 558.6348 | 0.002387 | -0.58055 | 0.245809 | -2.3618  | 0.020144 | 0.071536 | 1 |
| ENSG0000 response | Inflamed | KCNJ16    | protein_cc chr17 | 68049570 | 68131749 | + | 6319  | 7.680191 | 0.24821  | 0.530938 | 0.224866 | 2.361125 | 0.020178 | 0.071649 | 1 |
| ENSG0000 response | Inflamed | AP1S2     | protein_cc chrX  | 15843929 | 15873054 | - | 5362  | 455.8377 | 0        | -0.39054 | 0.165419 | -2.36093 | 0.020188 | 0.071675 | 1 |
| ENSG0000 response | Inflamed | ATM       | protein_cc chr11 | 1.08E+08 | 1.08E+08 | + | 22317 | 1452.076 | 0        | -0.50612 | 0.214391 | -2.36071 | 0.0202   | 0.071706 | 1 |
| ENSG0000 response | Inflamed | MYH14     | protein_cc chr19 | 50691443 | 50813802 | + | 9933  | 29911.52 | 0        | 0.518594 | 0.219764 | 2.359779 | 0.020248 | 0.071866 | 1 |
| ENSG0000 response | Inflamed | FGF14-AS2 | lincRNA chr13    | 1.03E+08 | 1.03E+08 | + | 1074  | 14.6778  | 0.004773 | -0.36146 | 0.153189 | -2.35955 | 0.02026  | 0.071898 | 1 |
| ENSG0000 response | Inflamed | AZGP1     | protein_cc chr7  | 99564343 | 99573780 | - | 2699  | 600.2124 | 0.004773 | -0.6842  | 0.290004 | -2.35928 | 0.020273 | 0.071937 | 1 |
| ENSG0000 response | Inflamed | AOC2      | protein_cc chr17 | 40996617 | 41002724 | + | 2657  | 25.30788 | 0.023866 | -0.39967 | 0.169426 | -2.35897 | 0.020289 | 0.071984 | 1 |
| ENSG0000 response | Inflamed | C6orf132  | protein_cc chr6  | 42068856 | 42110357 | - | 6852  | 2700.668 | 0        | 0.258148 | 0.109435 | 2.358908 | 0.020293 | 0.071987 | 1 |
| ENSG0000 response | Inflamed | MPV17L2   | protein_cc chr19 | 18303992 | 18307758 | + | 2135  | 455.9666 | 0        | -0.19421 | 0.08234  | -2.35865 | 0.020306 | 0.072025 | 1 |
| ENSG0000 response | Inflamed | NT5C3B    | protein_cc chr17 | 39981335 | 39992523 | - | 2836  | 561.8186 | 0        | -0.22861 | 0.096951 | -2.35804 | 0.020337 | 0.072126 | 1 |
| ENSG0000 response | Inflamed | AF064858  | lincRNA chr21    | 40249215 | 40328392 | - | 4043  | 6.250597 | 0.167064 | 0.420007 | 0.178137 | 2.357773 | 0.020351 | 0.072166 | 1 |
| ENSG0000 response | Inflamed | FAM84B    | protein_cc chr8  | 1.28E+08 | 1.28E+08 | - | 5404  | 1758.621 | 0        | 0.399513 | 0.169506 | 2.356931 | 0.020395 | 0.072311 | 1 |
| ENSG0000 response | Inflamed | HOXB7     | protein_cc chr17 | 46684594 | 46710934 | - | 1520  | 727.747  | 0        | 0.226762 | 0.096215 | 2.356825 | 0.020401 | 0.072313 | 1 |
| ENSG0000 response | Inflamed | RP4-529N  | lincRNA chr6     | 4610890  | 4611538  | + | 484   | 0.97136  | 0.75179  | -0.27686 | 0.117474 | -2.35681 | 0.020401 | 0.072313 | 1 |
| ENSG0000 response | Inflamed | TOM1L2    | protein_cc chr17 | 17746828 | 17875736 | - | 7860  | 4537.174 | 0        | 0.266931 | 0.113273 | 2.356528 | 0.020416 | 0.072353 | 1 |
| ENSG0000 response | Inflamed | FASTKD1   | protein_cc chr2  | 1.7E+08  | 1.7E+08  | - | 4451  | 869.6587 | 0        | 0.41165  | 0.174694 | 2.356406 | 0.020422 | 0.072353 | 1 |
| ENSG0000 response | Inflamed | CYP3A5    | protein_cc chr7  | 99245817 | 99277621 | - | 6731  | 2574.842 | 0        | 0.649538 | 0.275651 | 2.356374 | 0.020424 | 0.072353 | 1 |
| ENSG0000 response | Inflamed | PPOX      | protein_cc chr1  | 1.61E+08 | 1.61E+08 | + | 4607  | 420.1814 | 0        | -0.24671 | 0.104699 | -2.35633 | 0.020426 | 0.072353 | 1 |
| ENSG0000 response | Inflamed | CTD-3224  | lincRNA chr5     | 1.39E+08 | 1.39E+08 | - | 577   | 0.875895 | 0.797136 | -0.23576 | 0.100056 | -2.35632 | 0.020427 | 0.072353 | 1 |
| ENSG0000 response | Inflamed | AGAP11    | processed_chr10  | 88752163 | 88769960 | + | 4560  | 5.360382 | 0.257757 | 0.39308  | 0.166823 | 2.356277 | 0.020429 | 0.072353 | 1 |
| ENSG0000 response | Inflamed | PGK1      | protein_cc chrX  | 77320685 | 77384793 | + | 5725  | 10482.18 | 0        | -0.24139 | 0.102448 | -2.35623 | 0.020432 | 0.072353 | 1 |
| ENSG0000 response | Inflamed | SEPN1     | protein_cc chr1  | 26126667 | 26144713 | + | 4421  | 5079.859 | 0        | -0.28797 | 0.122231 | -2.35598 | 0.020444 | 0.072388 | 1 |
| ENSG0000 response | Inflamed | RP11-559  | antisense chr17  | 76480964 | 76495428 | + | 1585  | 0.933174 | 0.782816 | -0.30559 | 0.129717 | -2.3558  | 0.020454 | 0.07241  | 1 |
| ENSG0000 response | Inflamed | RP11-548  | lincRNA chr2     | 86131402 | 86131850 | + | 449   | 1.725537 | 0.536993 | -0.26946 | 0.114385 | -2.35576 | 0.020456 | 0.07241  | 1 |
| ENSG0000 response | Inflamed | C14orf64  | protein_cc chr14 | 98391947 | 98444461 | - | 5850  | 55.6611  | 0        | 0.369192 | 0.156725 | 2.355677 | 0.02046  | 0.072415 | 1 |
| ENSG0000 response | Inflamed | ARHGEF38  | protein_cc chr4  | 1.06E+08 | 1.07E+08 | + | 7579  | 276.5465 | 0.004773 | 0.594128 | 0.252237 | 2.355439 | 0.020473 | 0.072449 | 1 |
| ENSG0000 response | Inflamed | MEG9      | lincRNA chr14    | 1.02E+08 | 1.02E+08 | + | 2641  | 35.96897 | 0.02864  | -0.62128 | 0.263831 | -2.35485 | 0.020503 | 0.072547 | 1 |
| ENSG0000 response | Inflamed | TSPO2     | protein_cc chr6  | 41010293 | 41012076 | + | 988   | 7.718377 | 0.322196 | -0.53768 | 0.228355 | -2.35456 | 0.020519 | 0.072587 | 1 |
| ENSG0000 response | Inflamed | RN7SKP29  | misc_RNA chr3    | 1.9E+08  | 1.9E+08  | + | 341   | 1.300716 | 0.706444 | -0.29675 | 0.126034 | -2.35453 | 0.02052  | 0.072587 | 1 |
| ENSG0000 response | Inflamed | EVA1C     | protein_cc chr21 | 33784314 | 33887707 | + | 4353  | 295.8783 | 0        | -0.21937 | 0.09318  | -2.35421 | 0.020537 | 0.072638 | 1 |

|                   |          |           |                  |          |          |   |       |          |          |          |          |          |          |          |   |
|-------------------|----------|-----------|------------------|----------|----------|---|-------|----------|----------|----------|----------|----------|----------|----------|---|
| ENSG0000 response | Inflamed | SRSF12    | protein_cc chr6  | 89805678 | 89827800 | - | 4548  | 5.906921 | 0.167064 | -0.43567 | 0.185069 | -2.35411 | 0.020542 | 0.072645 | 1 |
| ENSG0000 response | Inflamed | ZNF580    | protein_cc chr19 | 56146382 | 56154835 | + | 2403  | 919.0501 | 0        | -0.21607 | 0.091784 | -2.35406 | 0.020545 | 0.072645 | 1 |
| ENSG0000 response | Inflamed | MRPL55    | protein_cc chr1  | 2.28E+08 | 2.28E+08 | - | 1886  | 625.7924 | 0        | -0.18511 | 0.078645 | -2.35378 | 0.020559 | 0.072686 | 1 |
| ENSG0000 response | Inflamed | ARMC12    | protein_cc chr6  | 35704809 | 35716856 | + | 1418  | 11.07399 | 0.071599 | -0.38173 | 0.162194 | -2.3535  | 0.020574 | 0.072728 | 1 |
| ENSG0000 response | Inflamed | FTLP14    | pseudoger chr16  | 68856490 | 68856973 | + | 484   | 79.79475 | 0        | 0.382159 | 0.1624   | 2.353192 | 0.02059  | 0.072776 | 1 |
| ENSG0000 response | Inflamed | TRIM15    | protein_cc chr6  | 30130993 | 30140473 | + | 2498  | 2265.866 | 0        | 0.518204 | 0.220238 | 2.352928 | 0.020604 | 0.072815 | 1 |
| ENSG0000 response | Inflamed | FAM222A   | protein_cc chr12 | 1.1E+08  | 1.1E+08  | + | 3722  | 318.5251 | 0        | 0.345843 | 0.147003 | 2.352629 | 0.02062  | 0.072861 | 1 |
| ENSG0000 response | Inflamed | RP1-43E13 | antisense chr1   | 19536995 | 19567198 | + | 507   | 16.99761 | 0.002387 | -0.27854 | 0.118409 | -2.35235 | 0.020634 | 0.072903 | 1 |
| ENSG0000 response | Inflamed | RP13-131k | lincRNA chr3     | 49022918 | 49023396 | - | 479   | 13.16229 | 0.00716  | 0.291656 | 0.123996 | 2.352143 | 0.020645 | 0.072932 | 1 |
| ENSG0000 response | Inflamed | CDH17     | protein_cc chr8  | 95139399 | 95229531 | - | 3901  | 19891.44 | 0        | 0.654281 | 0.278178 | 2.352026 | 0.020651 | 0.072944 | 1 |
| ENSG0000 response | Inflamed | RP11-400k | pseudoger chr8   | 54445468 | 54446264 | + | 478   | 1.152745 | 0.718377 | 0.239965 | 0.102034 | 2.351829 | 0.020661 | 0.07297  | 1 |
| ENSG0000 response | Inflamed | RP11-958k | pseudoger chr16  | 16450081 | 16471364 | + | 9932  | 96.43914 | 0.040573 | 0.491087 | 0.208834 | 2.351566 | 0.020675 | 0.073009 | 1 |
| ENSG0000 response | Inflamed | C19orf47  | protein_cc chr19 | 40825443 | 40854434 | - | 4875  | 543.1671 | 0        | -0.16481 | 0.0701   | -2.35105 | 0.020702 | 0.073079 | 1 |
| ENSG0000 response | Inflamed | ADH1A     | protein_cc chr4  | 1E+08    | 1E+08    | - | 2258  | 2.863962 | 0.494033 | 0.448593 | 0.190806 | 2.351042 | 0.020703 | 0.073079 | 1 |
| ENSG0000 response | Inflamed | RP13-36G  | pseudoger chrX   | 73285918 | 73286427 | + | 510   | 1.47494  | 0.601432 | -0.28102 | 0.119532 | -2.35103 | 0.020704 | 0.073079 | 1 |
| ENSG0000 response | Inflamed | GEMIN7    | protein_cc chr19 | 45582453 | 45594782 | + | 1915  | 514.401  | 0        | -0.15422 | 0.065603 | -2.3508  | 0.020716 | 0.073113 | 1 |
| ENSG0000 response | Inflamed | LGALS3BP  | protein_cc chr17 | 76967320 | 76976191 | - | 3584  | 35523.02 | 0        | 0.262709 | 0.111756 | 2.35073  | 0.020719 | 0.073115 | 1 |
| ENSG0000 response | Inflamed | RP11-93B1 | protein_cc chr20 | 61272071 | 61274656 | - | 1933  | 23.92124 | 0.016706 | 0.371227 | 0.157945 | 2.350363 | 0.020739 | 0.073174 | 1 |
| ENSG0000 response | Inflamed | REM2      | protein_cc chr14 | 23352374 | 23356895 | + | 2305  | 32.48449 | 0.002387 | -0.38587 | 0.16418  | -2.35031 | 0.020742 | 0.073174 | 1 |
| ENSG0000 response | Inflamed | AC005262  | antisense chr19  | 3118663  | 3119302  | - | 452   | 8.343675 | 0.245823 | -0.55156 | 0.234761 | -2.34947 | 0.020786 | 0.073315 | 1 |
| ENSG0000 response | Inflamed | SPG20     | protein_cc chr13 | 36875775 | 36944317 | - | 6387  | 426.105  | 0        | -0.45844 | 0.195129 | -2.34944 | 0.020787 | 0.073315 | 1 |
| ENSG0000 response | Inflamed | RP11-15N  | sense_ove chr3   | 99898411 | 99900574 | + | 2164  | 4.50358  | 0.217184 | 0.3928   | 0.167201 | 2.349267 | 0.020796 | 0.073335 | 1 |
| ENSG0000 response | Inflamed | SFN       | protein_cc chr1  | 27189633 | 27190947 | + | 1315  | 7466.076 | 0        | 0.453694 | 0.193124 | 2.349231 | 0.020798 | 0.073335 | 1 |
| ENSG0000 response | Inflamed | ACKR3     | protein_cc chr2  | 2.37E+08 | 2.37E+08 | + | 2258  | 682.1718 | 0        | -0.44175 | 0.188084 | -2.34867 | 0.020828 | 0.073429 | 1 |
| ENSG0000 response | Inflamed | CCDC178   | protein_cc chr18 | 30517366 | 31021065 | - | 4475  | 8.293556 | 0.167064 | -0.45297 | 0.192892 | -2.34831 | 0.020847 | 0.073487 | 1 |
| ENSG0000 response | Inflamed | SMTNL2    | protein_cc chr17 | 4487294  | 4511614  | + | 2470  | 34.45107 | 0.00716  | -0.49769 | 0.211944 | -2.34823 | 0.020852 | 0.073487 | 1 |
| ENSG0000 response | Inflamed | IRF2      | protein_cc chr4  | 1.85E+08 | 1.85E+08 | - | 3116  | 1802.828 | 0        | -0.20775 | 0.08847  | -2.34821 | 0.020853 | 0.073487 | 1 |
| ENSG0000 response | Inflamed | ZBTB20    | protein_cc chr3  | 1.14E+08 | 1.15E+08 | - | 8279  | 22.1074  | 0.01432  | -0.35132 | 0.14962  | -2.34812 | 0.020857 | 0.073493 | 1 |
| ENSG0000 response | Inflamed | PRC1-AS1  | antisense chr15  | 91509575 | 91531854 | + | 1799  | 13.88305 | 0.078759 | 0.442267 | 0.188363 | 2.347952 | 0.020866 | 0.07351  | 1 |
| ENSG0000 response | Inflamed | LEPR      | protein_cc chr1  | 65886248 | 66107242 | + | 11457 | 179.8353 | 0.00716  | -0.49845 | 0.212293 | -2.34793 | 0.020867 | 0.07351  | 1 |
| ENSG0000 response | Inflamed | GAL3ST4   | protein_cc chr7  | 99756867 | 99766373 | - | 3397  | 431.6539 | 0        | 0.382643 | 0.162977 | 2.347838 | 0.020872 | 0.07351  | 1 |
| ENSG0000 response | Inflamed | GBP1P1    | pseudoger chr1   | 89873238 | 89891802 | + | 2352  | 55.28878 | 0.01432  | -0.60266 | 0.256688 | -2.34782 | 0.020873 | 0.07351  | 1 |
| ENSG0000 response | Inflamed | RP11-79H  | lincRNA chr8     | 79749764 | 79752757 | + | 2994  | 39.59666 | 0.031026 | -0.63976 | 0.272509 | -2.34766 | 0.020882 | 0.073528 | 1 |
| ENSG0000 response | Inflamed | MEX3B     | protein_cc chr15 | 82334119 | 82338482 | - | 4364  | 119.7637 | 0.011933 | -0.44536 | 0.18971  | -2.3476  | 0.020885 | 0.073528 | 1 |
| ENSG0000 response | Inflamed | FURIN     | protein_cc chr15 | 91411822 | 91426688 | + | 4661  | 10816.26 | 0        | -0.26335 | 0.112178 | -2.34757 | 0.020886 | 0.073528 | 1 |
| ENSG0000 response | Inflamed | AKAP12    | protein_cc chr6  | 1.52E+08 | 1.52E+08 | + | 8741  | 861.1504 | 0        | -0.513   | 0.218536 | -2.34746 | 0.020892 | 0.073537 | 1 |
| ENSG0000 response | Inflamed | ARHGAP27  | protein_cc chr17 | 43471275 | 43511787 | - | 10419 | 7436.604 | 0        | 0.22735  | 0.096873 | 2.346894 | 0.020922 | 0.073633 | 1 |
| ENSG0000 response | Inflamed | LINC01079 | lincRNA chr13    | 27947485 | 27948503 | + | 580   | 2.100239 | 0.501193 | 0.313894 | 0.133751 | 2.346845 | 0.020925 | 0.073633 | 1 |
| ENSG0000 response | Inflamed | U3        | snoRNA chr17     | 42102389 | 42102591 | - | 203   | 2.868735 | 0.336516 | 0.340796 | 0.145263 | 2.346067 | 0.020966 | 0.073768 | 1 |
| ENSG0000 response | Inflamed | HUNK      | protein_cc chr21 | 33245628 | 33416946 | + | 8294  | 562.5394 | 0        | 0.411831 | 0.175549 | 2.345956 | 0.020972 | 0.073779 | 1 |

|                   |          |           |                  |          |          |   |       |          |          |          |          |          |          |          |   |
|-------------------|----------|-----------|------------------|----------|----------|---|-------|----------|----------|----------|----------|----------|----------|----------|---|
| ENSG0000 response | Inflamed | CD300LG   | protein_cc chr17 | 41924516 | 41940997 | + | 4745  | 15.51551 | 0.064439 | -0.49001 | 0.208879 | -2.34589 | 0.020975 | 0.073782 | 1 |
| ENSG0000 response | Inflamed | CTB-113I2 | lincRNA chr5     | 1.33E+08 | 1.33E+08 | + | 416   | 19.06921 | 0.004773 | 0.296211 | 0.126283 | 2.345609 | 0.02099  | 0.073825 | 1 |
| ENSG0000 response | Inflamed | RP11-691I | protein_cc chr11 | 57509635 | 57560715 | + | 580   | 22.58473 | 0.102625 | 0.621272 | 0.264877 | 2.345513 | 0.020996 | 0.073833 | 1 |
| ENSG0000 response | Inflamed | CDC42SE1  | protein_cc chr1  | 1.51E+08 | 1.51E+08 | - | 4184  | 5246.36  | 0        | -0.23145 | 0.098684 | -2.34532 | 0.021006 | 0.073859 | 1 |
| ENSG0000 response | Inflamed | SLC25A13  | protein_cc chr7  | 95749532 | 95951459 | - | 3710  | 1289.356 | 0        | 0.281918 | 0.120221 | 2.344993 | 0.021023 | 0.07391  | 1 |
| ENSG0000 response | Inflamed | CFLAR     | protein_cc chr2  | 2.02E+08 | 2.02E+08 | + | 22528 | 7251.797 | 0        | -0.31623 | 0.134862 | -2.34488 | 0.02103  | 0.073923 | 1 |
| ENSG0000 response | Inflamed | ACER2     | protein_cc chr9  | 19408925 | 19452018 | + | 2437  | 224.8759 | 0.01432  | 0.597851 | 0.254968 | 2.344808 | 0.021033 | 0.073925 | 1 |
| ENSG0000 response | Inflamed | ALOX15    | protein_cc chr17 | 4534197  | 4545589  | - | 3404  | 226.1337 | 0.004773 | -0.645   | 0.275102 | -2.34458 | 0.021046 | 0.073959 | 1 |
| ENSG0000 response | Inflamed | RP5-836N  | lincRNA chr1     | 1.12E+08 | 1.12E+08 | - | 1377  | 15.8401  | 0.064439 | -0.50906 | 0.217162 | -2.34415 | 0.021068 | 0.074029 | 1 |
| ENSG0000 response | Inflamed | TUBBP1    | pseudoger chr8   | 30209389 | 30211034 | + | 1646  | 29.53461 | 0.002387 | -0.29419 | 0.125523 | -2.3437  | 0.021092 | 0.074098 | 1 |
| ENSG0000 response | Inflamed | GRK4      | protein_cc chr4  | 2965335  | 3042474  | + | 4686  | 96.41289 | 0        | -0.2671  | 0.113965 | -2.34368 | 0.021094 | 0.074098 | 1 |
| ENSG0000 response | Inflamed | USP3-AS1  | antisense chr15  | 63836446 | 63893788 | - | 3581  | 27.24105 | 0        | 0.3517   | 0.150088 | 2.34329  | 0.021114 | 0.074161 | 1 |
| ENSG0000 response | Inflamed | KIAA1211L | protein_cc chr2  | 99410309 | 99552722 | - | 4705  | 622.1002 | 0        | 0.271328 | 0.115796 | 2.343162 | 0.021121 | 0.074175 | 1 |
| ENSG0000 response | Inflamed | DKFZP434I | protein_cc chr9  | 98534605 | 98537013 | + | 2409  | 10.97613 | 0.095465 | 0.497435 | 0.21238  | 2.342194 | 0.021173 | 0.074347 | 1 |
| ENSG0000 response | Inflamed | CAPNS2    | protein_cc chr16 | 55600584 | 55601599 | + | 1016  | 1.116945 | 0.732697 | -0.27401 | 0.117003 | -2.34193 | 0.021187 | 0.074388 | 1 |
| ENSG0000 response | Inflamed | ELOVL6    | protein_cc chr4  | 1.11E+08 | 1.11E+08 | - | 7297  | 1792.776 | 0        | 0.542777 | 0.231858 | 2.340987 | 0.021238 | 0.074555 | 1 |
| ENSG0000 response | Inflamed | FAM120C   | protein_cc chrX  | 54094757 | 54209714 | - | 8799  | 186.1456 | 0        | -0.35586 | 0.152024 | -2.3408  | 0.021248 | 0.074581 | 1 |
| ENSG0000 response | Inflamed | C11orf53  | protein_cc chr11 | 1.11E+08 | 1.11E+08 | + | 1205  | 77.15274 | 0.004773 | 0.430034 | 0.183746 | 2.340372 | 0.021271 | 0.074652 | 1 |
| ENSG0000 response | Inflamed | AC006483  | pseudoger chr7   | 5600374  | 5600686  | + | 313   | 3.868735 | 0.343675 | -0.37015 | 0.158165 | -2.34029 | 0.021276 | 0.074657 | 1 |
| ENSG0000 response | Inflamed | ARHGEF25  | protein_cc chr12 | 58003963 | 58013162 | + | 3362  | 447.8663 | 0        | -0.43389 | 0.185425 | -2.33998 | 0.021292 | 0.074705 | 1 |
| ENSG0000 response | Inflamed | LINC00398 | lincRNA chr13    | 31377343 | 31384782 | + | 906   | 1.53222  | 0.594272 | -0.28954 | 0.12374  | -2.33987 | 0.021298 | 0.074717 | 1 |
| ENSG0000 response | Inflamed | RP11-382I | antisense chr15  | 83782369 | 83783318 | - | 396   | 4.112172 | 0.210024 | -0.36272 | 0.155023 | -2.33975 | 0.021305 | 0.074721 | 1 |
| ENSG0000 response | Inflamed | PECR      | protein_cc chr2  | 2.17E+08 | 2.17E+08 | - | 3182  | 331.0453 | 0        | 0.276776 | 0.118293 | 2.339741 | 0.021305 | 0.074721 | 1 |
| ENSG0000 response | Inflamed | SH2D5     | protein_cc chr1  | 21046225 | 21059330 | - | 4423  | 2.202864 | 0.551313 | -0.38455 | 0.164375 | -2.33945 | 0.021321 | 0.074767 | 1 |
| ENSG0000 response | Inflamed | RP11-517F | lincRNA chr10    | 43916186 | 43917548 | + | 760   | 43.29356 | 0.016706 | -0.2819  | 0.120514 | -2.33917 | 0.021336 | 0.074809 | 1 |
| ENSG0000 response | Inflamed | EHBP1L1   | protein_cc chr11 | 65343509 | 65360121 | + | 6705  | 7675.506 | 0        | -0.26185 | 0.111949 | -2.339   | 0.021345 | 0.074832 | 1 |
| ENSG0000 response | Inflamed | RP11-466I | pseudoger chr11  | 16996240 | 16996560 | - | 321   | 102.3437 | 0        | 0.381373 | 0.163103 | 2.338241 | 0.021386 | 0.074965 | 1 |
| ENSG0000 response | Inflamed | SEMA5B    | protein_cc chr3  | 1.23E+08 | 1.23E+08 | - | 6223  | 133.8043 | 0.009547 | -0.46568 | 0.199206 | -2.33768 | 0.021416 | 0.075062 | 1 |
| ENSG0000 response | Inflamed | TRAV27    | TR_V_gene chr14  | 22615949 | 22616587 | + | 425   | 6.260143 | 0.171838 | -0.40233 | 0.17211  | -2.33762 | 0.02142  | 0.075063 | 1 |
| ENSG0000 response | Inflamed | LINC00667 | lincRNA chr18    | 5232875  | 5246507  | + | 6979  | 1203.196 | 0        | 0.234546 | 0.10034  | 2.337509 | 0.021426 | 0.075074 | 1 |
| ENSG0000 response | Inflamed | MAML3     | protein_cc chr4  | 1.41E+08 | 1.41E+08 | - | 7030  | 924.7566 | 0        | 0.338703 | 0.144907 | 2.337375 | 0.021433 | 0.07509  | 1 |
| ENSG0000 response | Inflamed | BZW2      | protein_cc chr7  | 16685756 | 16746148 | + | 3662  | 1517.983 | 0        | 0.246347 | 0.105398 | 2.337302 | 0.021437 | 0.075094 | 1 |
| ENSG0000 response | Inflamed | RP5-1051J | pseudoger chr7   | 1.5E+08  | 1.5E+08  | + | 610   | 1.183771 | 0.689737 | -0.25914 | 0.110873 | -2.33724 | 0.02144  | 0.075095 | 1 |
| ENSG0000 response | Inflamed | PANK3     | protein_cc chr5  | 1.68E+08 | 1.68E+08 | - | 10580 | 3034.609 | 0        | 0.457045 | 0.195559 | 2.337113 | 0.021447 | 0.07511  | 1 |
| ENSG0000 response | Inflamed | NDUFAF5   | protein_cc chr20 | 13765596 | 13799067 | + | 4056  | 233.4845 | 0        | 0.215783 | 0.092339 | 2.336848 | 0.021462 | 0.07515  | 1 |
| ENSG0000 response | Inflamed | DGKG      | protein_cc chr3  | 1.86E+08 | 1.86E+08 | - | 10978 | 44.53938 | 0.011933 | -0.39932 | 0.170918 | -2.33631 | 0.021491 | 0.075243 | 1 |
| ENSG0000 response | Inflamed | MKL1      | protein_cc chr22 | 40806285 | 41032706 | - | 5538  | 2221.014 | 0        | -0.23571 | 0.100901 | -2.33606 | 0.021505 | 0.075281 | 1 |
| ENSG0000 response | Inflamed | RNF128    | protein_cc chrX  | 1.06E+08 | 1.06E+08 | + | 3432  | 1089.561 | 0.004773 | 0.571978 | 0.244854 | 2.335998 | 0.021508 | 0.075282 | 1 |
| ENSG0000 response | Inflamed | U62631.5  | sense_intr chr19 | 35821746 | 35822823 | + | 435   | 26.49165 | 0.159905 | -0.71177 | 0.304713 | -2.33587 | 0.021515 | 0.075296 | 1 |
| ENSG0000 response | Inflamed | CTA-373H  | lincRNA chr22    | 27063656 | 27068617 | - | 2613  | 3.050119 | 0.420048 | -0.35271 | 0.151015 | -2.33561 | 0.021529 | 0.075336 | 1 |

|                   |          |           |                  |          |          |   |       |          |          |          |          |          |          |          |   |
|-------------------|----------|-----------|------------------|----------|----------|---|-------|----------|----------|----------|----------|----------|----------|----------|---|
| ENSG0000 response | Inflamed | ADAP2     | protein_cc chr17 | 29233362 | 29286340 | + | 3750  | 609.8162 | 0        | -0.2185  | 0.09359  | -2.33466 | 0.021581 | 0.075493 | 1 |
| ENSG0000 response | Inflamed | PPCS      | protein_cc chr1  | 42921788 | 42939056 | + | 2628  | 1607.439 | 0        | 0.211756 | 0.090701 | 2.33465  | 0.021581 | 0.075493 | 1 |
| ENSG0000 response | Inflamed | MS4A2     | protein_cc chr11 | 59855734 | 59863444 | + | 1958  | 93.38663 | 0.011933 | -0.60261 | 0.258117 | -2.33463 | 0.021583 | 0.075493 | 1 |
| ENSG0000 response | Inflamed | CASC15    | lincRNA chr6     | 21665003 | 22214734 | + | 11161 | 63.31981 | 0.00716  | -0.48235 | 0.206614 | -2.33453 | 0.021588 | 0.075501 | 1 |
| ENSG0000 response | Inflamed | TIMP3     | protein_cc chr22 | 33197687 | 33259030 | + | 4603  | 7099.282 | 0        | -0.48598 | 0.208184 | -2.33437 | 0.021597 | 0.075523 | 1 |
| ENSG0000 response | Inflamed | SYT9      | protein_cc chr11 | 7260009  | 7490273  | + | 4727  | 2.479714 | 0.494033 | -0.3661  | 0.156835 | -2.33429 | 0.021601 | 0.075527 | 1 |
| ENSG0000 response | Inflamed | STK39     | protein_cc chr2  | 1.69E+08 | 1.69E+08 | - | 4247  | 2110.833 | 0        | 0.317392 | 0.135994 | 2.333865 | 0.021624 | 0.075599 | 1 |
| ENSG0000 response | Inflamed | AC083900  | sense_intr chr2  | 2.09E+08 | 2.09E+08 | - | 469   | 7.961814 | 0.109785 | 0.404988 | 0.173537 | 2.333727 | 0.021632 | 0.075615 | 1 |
| ENSG0000 response | Inflamed | CTSZ      | protein_cc chr20 | 57570240 | 57582302 | - | 2038  | 14024.62 | 0        | -0.15807 | 0.067754 | -2.33305 | 0.021669 | 0.075734 | 1 |
| ENSG0000 response | Inflamed | RAB19     | protein_cc chr7  | 1.4E+08  | 1.4E+08  | + | 1138  | 121.1742 | 0.016706 | 0.427858 | 0.183398 | 2.332952 | 0.021674 | 0.075743 | 1 |
| ENSG0000 response | Inflamed | ST6GALNA  | protein_cc chr9  | 1.31E+08 | 1.31E+08 | - | 2630  | 1968.535 | 0        | -0.26698 | 0.11445  | -2.33269 | 0.021689 | 0.075784 | 1 |
| ENSG0000 response | Inflamed | GPSM1     | protein_cc chr9  | 1.39E+08 | 1.39E+08 | + | 4945  | 469.4415 | 0        | -0.40158 | 0.172225 | -2.33174 | 0.021741 | 0.075955 | 1 |
| ENSG0000 response | Inflamed | CTBS      | protein_cc chr1  | 85015289 | 85040163 | - | 6939  | 726.4558 | 0        | -0.25179 | 0.107999 | -2.3314  | 0.02176  | 0.076011 | 1 |
| ENSG0000 response | Inflamed | SLC26A4   | protein_cc chr7  | 1.07E+08 | 1.07E+08 | + | 5800  | 37.57279 | 0.069212 | -0.77618 | 0.332943 | -2.33127 | 0.021766 | 0.076025 | 1 |
| ENSG0000 response | Inflamed | MYBPC1    | protein_cc chr12 | 1.02E+08 | 1.02E+08 | + | 7385  | 31.71599 | 0.059666 | 0.795306 | 0.341163 | 2.331159 | 0.021773 | 0.076036 | 1 |
| ENSG0000 response | Inflamed | GAS2L2    | protein_cc chr17 | 34071530 | 34079897 | - | 3014  | 4.116945 | 0.28401  | 0.403526 | 0.173105 | 2.331107 | 0.021776 | 0.076036 | 1 |
| ENSG0000 response | Inflamed | CD109     | protein_cc chr6  | 74405508 | 74538040 | + | 9563  | 373.957  | 0        | -0.55281 | 0.237272 | -2.32986 | 0.021844 | 0.076265 | 1 |
| ENSG0000 response | Inflamed | ACTN4     | protein_cc chr19 | 39138289 | 39222223 | + | 6103  | 45551.8  | 0        | 0.260155 | 0.111683 | 2.329402 | 0.02187  | 0.076344 | 1 |
| ENSG0000 response | Inflamed | AP003733  | protein_cc chr11 | 61735453 | 61736755 | + | 1303  | 8.023866 | 0.057279 | -0.36705 | 0.157605 | -2.3289  | 0.021897 | 0.076423 | 1 |
| ENSG0000 response | Inflamed | SRD5A3-A' | processed_chr4   | 56230138 | 56262014 | - | 4592  | 7.410501 | 0.102625 | -0.38985 | 0.167399 | -2.32889 | 0.021898 | 0.076423 | 1 |
| ENSG0000 response | Inflamed | EIF3FP1   | pseudoger chr21  | 11180920 | 11181815 | - | 896   | 1.451074 | 0.599045 | -0.25999 | 0.111645 | -2.32871 | 0.021908 | 0.076447 | 1 |
| ENSG0000 response | Inflamed | SPIC      | protein_cc chr12 | 1.02E+08 | 1.02E+08 | + | 1132  | 3.47494  | 0.436754 | -0.39616 | 0.170143 | -2.32839 | 0.021925 | 0.076499 | 1 |
| ENSG0000 response | Inflamed | PCNX      | protein_cc chr14 | 71374122 | 71582099 | + | 16715 | 2130.532 | 0        | -0.40601 | 0.174384 | -2.32826 | 0.021933 | 0.076514 | 1 |
| ENSG0000 response | Inflamed | AMN1      | protein_cc chr12 | 31824071 | 31882108 | - | 3195  | 105.4749 | 0        | -0.26132 | 0.112247 | -2.32808 | 0.021943 | 0.076535 | 1 |
| ENSG0000 response | Inflamed | RP11-127E | lincRNA chr4     | 83266029 | 83266693 | - | 665   | 5.849642 | 0.212411 | 0.422513 | 0.181488 | 2.328047 | 0.021944 | 0.076535 | 1 |
| ENSG0000 response | Inflamed | CCDC102B  | protein_cc chr18 | 66382446 | 66722426 | + | 5844  | 71.14558 | 0        | -0.42677 | 0.183332 | -2.32785 | 0.021955 | 0.076563 | 1 |
| ENSG0000 response | Inflamed | NBEAP1    | pseudoger chr15  | 20862967 | 20893737 | - | 3689  | 2.171838 | 0.472554 | -0.3279  | 0.14087  | -2.32768 | 0.021965 | 0.076586 | 1 |
| ENSG0000 response | Inflamed | AC096559  | lincRNA chr2     | 11988748 | 12718474 | + | 3876  | 2.794749 | 0.48926  | -0.34187 | 0.146879 | -2.32757 | 0.021971 | 0.076597 | 1 |
| ENSG0000 response | Inflamed | RP11-77H  | lincRNA chr16    | 9056563  | 9060847  | + | 427   | 3.694511 | 0.286396 | -0.36404 | 0.156406 | -2.32751 | 0.021974 | 0.076597 | 1 |
| ENSG0000 response | Inflamed | ROPN1     | protein_cc chr3  | 1.24E+08 | 1.24E+08 | - | 4395  | 4.167064 | 0.494033 | 0.386502 | 0.166066 | 2.327398 | 0.02198  | 0.076605 | 1 |
| ENSG0000 response | Inflamed | PIEZO1    | protein_cc chr16 | 88781751 | 88851619 | - | 10855 | 7467.582 | 0        | -0.28661 | 0.123148 | -2.32737 | 0.021982 | 0.076605 | 1 |
| ENSG0000 response | Inflamed | PCDHB5    | protein_cc chr5  | 1.41E+08 | 1.41E+08 | + | 2904  | 29.55609 | 0.023866 | -0.42683 | 0.183411 | -2.32717 | 0.021993 | 0.076633 | 1 |
| ENSG0000 response | Inflamed | PRKD3     | protein_cc chr2  | 37477645 | 37551951 | - | 10244 | 962.7041 | 0        | -0.42898 | 0.18436  | -2.32685 | 0.022011 | 0.076685 | 1 |
| ENSG0000 response | Inflamed | SLC25A33  | protein_cc chr1  | 9599541  | 9645237  | + | 3854  | 434.9523 | 0        | 0.18068  | 0.077685 | 2.325812 | 0.022069 | 0.076876 | 1 |
| ENSG0000 response | Inflamed | MCOLN1    | protein_cc chr19 | 7587512  | 7598895  | + | 3956  | 1047.742 | 0        | -0.18094 | 0.077806 | -2.32557 | 0.022082 | 0.076909 | 1 |
| ENSG0000 response | Inflamed | FAM114A2  | protein_cc chr5  | 1.53E+08 | 1.53E+08 | - | 6543  | 447.389  | 0        | -0.36316 | 0.156162 | -2.32553 | 0.022084 | 0.076909 | 1 |
| ENSG0000 response | Inflamed | PP13439   | protein_cc chr3  | 1.72E+08 | 1.72E+08 | - | 2906  | 18.6611  | 0.062053 | 0.527614 | 0.226898 | 2.325338 | 0.022095 | 0.076924 | 1 |
| ENSG0000 response | Inflamed | APOC3     | protein_cc chr11 | 1.17E+08 | 1.17E+08 | + | 866   | 178.1504 | 0.852029 | 0.776091 | 0.333758 | 2.325309 | 0.022097 | 0.076924 | 1 |
| ENSG0000 response | Inflamed | GLIPR2    | protein_cc chr9  | 36136732 | 36163910 | + | 3016  | 1356.026 | 0        | -0.26703 | 0.114841 | -2.32524 | 0.0221   | 0.076924 | 1 |
| ENSG0000 response | Inflamed | IGHV3-32  | IG_V_pseu chr14  | 1.07E+08 | 1.07E+08 | - | 326   | 1.162291 | 0.699284 | -0.27612 | 0.118749 | -2.32522 | 0.022101 | 0.076924 | 1 |

|          |          |          |                  |                  |          |          |   |       |          |          |          |          |          |          |          |   |
|----------|----------|----------|------------------|------------------|----------|----------|---|-------|----------|----------|----------|----------|----------|----------|----------|---|
| ENSG0000 | response | Inflamed | AF127936.lincRNA | chr21            | 16191164 | 16254296 | - | 7034  | 74.7327  | 0        | 0.361393 | 0.155425 | 2.325196 | 0.022103 | 0.076924 | 1 |
| ENSG0000 | response | Inflamed | URGCP            | protein_cc chr7  | 43915493 | 43966010 | - | 7844  | 2992.05  | 0        | 0.254675 | 0.109545 | 2.324846 | 0.022122 | 0.076974 | 1 |
| ENSG0000 | response | Inflamed | RP11-5481        | pseudoger chr4   | 1.2E+08  | 1.2E+08  | - | 3505  | 1.212411 | 0.706444 | -0.29359 | 0.126283 | -2.32484 | 0.022123 | 0.076974 | 1 |
| ENSG0000 | response | Inflamed | ZFYVE21          | protein_cc chr14 | 1.04E+08 | 1.04E+08 | + | 8390  | 1497.647 | 0        | 0.179583 | 0.077257 | 2.324509 | 0.022141 | 0.077027 | 1 |
| ENSG0000 | response | Inflamed | ZNF497           | protein_cc chr19 | 58865723 | 58874214 | - | 3897  | 52.69928 | 0.004773 | 0.303963 | 0.130791 | 2.324038 | 0.022168 | 0.077108 | 1 |
| ENSG0000 | response | Inflamed | DDA1             | protein_cc chr19 | 17420327 | 17434110 | + | 4596  | 1888.916 | 0        | 0.144195 | 0.062053 | 2.323745 | 0.022184 | 0.077155 | 1 |
| ENSG0000 | response | Inflamed | RP11-815J        | antisense chr15  | 86122277 | 86123409 | - | 953   | 6.004773 | 0.131265 | 0.378401 | 0.162846 | 2.323679 | 0.022188 | 0.077157 | 1 |
| ENSG0000 | response | Inflamed | RN7SL689I        | misc_RNA chr5    | 1.22E+08 | 1.22E+08 | - | 295   | 10.41527 | 0.052506 | 0.398475 | 0.171501 | 2.323452 | 0.0222   | 0.077192 | 1 |
| ENSG0000 | response | Inflamed | SOX6             | protein_cc chr11 | 15987995 | 16761138 | - | 19632 | 233.4678 | 0.002387 | 0.507674 | 0.218512 | 2.323327 | 0.022207 | 0.077206 | 1 |
| ENSG0000 | response | Inflamed | FAM21B           | protein_cc chr10 | 47894023 | 47949412 | + | 4382  | 244.1384 | 0.045346 | 0.42307  | 0.18211  | 2.323158 | 0.022217 | 0.077228 | 1 |
| ENSG0000 | response | Inflamed | FITM1            | protein_cc chr14 | 24600484 | 24602058 | + | 1355  | 21.04535 | 0.002387 | 0.256971 | 0.110621 | 2.322994 | 0.022226 | 0.07725  | 1 |
| ENSG0000 | response | Inflamed | MAP1B            | protein_cc chr5  | 71403061 | 71505395 | + | 12628 | 601.8807 | 0.002387 | -0.48553 | 0.20907  | -2.32231 | 0.022264 | 0.077373 | 1 |
| ENSG0000 | response | Inflamed | DRP2             | protein_cc chrX  | 1E+08    | 1.01E+08 | + | 8187  | 51.2864  | 0.02864  | 0.474098 | 0.204163 | 2.322147 | 0.022273 | 0.077386 | 1 |
| ENSG0000 | response | Inflamed | HDAC5            | protein_cc chr17 | 42154114 | 42201070 | - | 7618  | 2311.656 | 0        | -0.28674 | 0.123482 | -2.3221  | 0.022276 | 0.077386 | 1 |
| ENSG0000 | response | Inflamed | COL4A3           | protein_cc chr2  | 2.28E+08 | 2.28E+08 | + | 9124  | 155.6683 | 0.004773 | -0.56641 | 0.243925 | -2.32209 | 0.022277 | 0.077386 | 1 |
| ENSG0000 | response | Inflamed | RAG1             | protein_cc chr11 | 36532259 | 36614706 | + | 7815  | 61.53938 | 0.009547 | 0.446538 | 0.192342 | 2.32158  | 0.022305 | 0.077475 | 1 |
| ENSG0000 | response | Inflamed | FAM196A          | protein_cc chr10 | 1.29E+08 | 1.29E+08 | - | 4403  | 7.229117 | 0.157518 | 0.404131 | 0.174112 | 2.32109  | 0.022333 | 0.077554 | 1 |
| ENSG0000 | response | Inflamed | RP11-511E        | lincRNA chr12    | 93392994 | 93413596 | + | 1251  | 1.852029 | 0.622912 | -0.32828 | 0.141435 | -2.32107 | 0.022334 | 0.077554 | 1 |
| ENSG0000 | response | Inflamed | RNASEH2A         | protein_cc chr19 | 12917394 | 12924452 | + | 2039  | 429.7924 | 0        | -0.20094 | 0.086598 | -2.32042 | 0.022371 | 0.077671 | 1 |
| ENSG0000 | response | Inflamed | INPP5A           | protein_cc chr10 | 1.34E+08 | 1.35E+08 | + | 3701  | 1451.057 | 0        | 0.159664 | 0.068812 | 2.320278 | 0.022379 | 0.077688 | 1 |
| ENSG0000 | response | Inflamed | CASP7            | protein_cc chr10 | 1.15E+08 | 1.15E+08 | + | 3466  | 5047.141 | 0        | 0.35865  | 0.15461  | 2.319709 | 0.022411 | 0.077789 | 1 |
| ENSG0000 | response | Inflamed | RP11-293F        | antisense chr1   | 24367325 | 24413289 | + | 454   | 2.935561 | 0.441527 | 0.263828 | 0.113759 | 2.319196 | 0.02244  | 0.077879 | 1 |
| ENSG0000 | response | Inflamed | SNX18P3          | pseudoger chr9   | 38566257 | 38568208 | - | 1952  | 15.46301 | 0.057279 | 0.476058 | 0.205295 | 2.318891 | 0.022457 | 0.077929 | 1 |
| ENSG0000 | response | Inflamed | RP11-834C        | lincRNA chr12    | 54475902 | 54496477 | + | 528   | 0.880668 | 0.77327  | -0.24626 | 0.10621  | -2.31859 | 0.022474 | 0.077977 | 1 |
| ENSG0000 | response | Inflamed | ENOX1            | protein_cc chr13 | 43787654 | 44361044 | - | 3518  | 45.80907 | 0.016706 | -0.49796 | 0.214775 | -2.31852 | 0.022478 | 0.07798  | 1 |
| ENSG0000 | response | Inflamed | RP11-474I        | antisense chr1   | 1.62E+08 | 1.62E+08 | - | 575   | 0.852029 | 0.794749 | -0.22574 | 0.097367 | -2.3184  | 0.022484 | 0.077987 | 1 |
| ENSG0000 | response | Inflamed | ACTBP8           | pseudoger chr6   | 88985601 | 88986708 | - | 1108  | 2.577566 | 0.718377 | -0.38626 | 0.166614 | -2.31832 | 0.022489 | 0.077987 | 1 |
| ENSG0000 | response | Inflamed | TRBV2            | TR_V_gene chr7   | 1.42E+08 | 1.42E+08 | + | 421   | 22.99045 | 0.02148  | -0.46376 | 0.200041 | -2.3183  | 0.02249  | 0.077987 | 1 |
| ENSG0000 | response | Inflamed | ELK1             | protein_cc chrX  | 47494920 | 47510003 | - | 3398  | 1673.52  | 0        | -0.17852 | 0.077007 | -2.31828 | 0.022491 | 0.077987 | 1 |
| ENSG0000 | response | Inflamed | AC073869         | pseudoger chr2   | 1.32E+08 | 1.32E+08 | - | 3666  | 77.22196 | 0.01432  | 0.502966 | 0.216986 | 2.317963 | 0.022509 | 0.078025 | 1 |
| ENSG0000 | response | Inflamed | CENPP            | protein_cc chr9  | 95087766 | 95382815 | + | 9788  | 202.6587 | 0        | -0.28396 | 0.122505 | -2.31796 | 0.022509 | 0.078025 | 1 |
| ENSG0000 | response | Inflamed | RP11-646E        | lincRNA chr3     | 1.82E+08 | 1.82E+08 | + | 592   | 1.272076 | 0.687351 | 0.23696  | 0.102229 | 2.31793  | 0.022511 | 0.078025 | 1 |
| ENSG0000 | response | Inflamed | ZNF815P          | pseudoger chr7   | 5862791  | 5894066  | + | 3325  | 70.51313 | 0        | -0.23033 | 0.09937  | -2.31787 | 0.022515 | 0.078025 | 1 |
| ENSG0000 | response | Inflamed | LL22NC03-        | pseudoger chr22  | 22657589 | 22664766 | + | 1121  | 90.13365 | 0        | -0.24895 | 0.107405 | -2.31783 | 0.022517 | 0.078025 | 1 |
| ENSG0000 | response | Inflamed | CTD-2331I        | lincRNA chr19    | 53426635 | 53427328 | + | 486   | 1.918854 | 0.539379 | 0.296429 | 0.127904 | 2.317589 | 0.022531 | 0.078061 | 1 |
| ENSG0000 | response | Inflamed | CFL1             | protein_cc chr11 | 65590493 | 65629497 | - | 5863  | 49735.25 | 0        | 0.148984 | 0.064292 | 2.317297 | 0.022547 | 0.078108 | 1 |
| ENSG0000 | response | Inflamed | CALCOCO1         | protein_cc chr12 | 54104903 | 54121529 | - | 6296  | 2873.878 | 0        | -0.30037 | 0.12968  | -2.31626 | 0.022606 | 0.078303 | 1 |
| ENSG0000 | response | Inflamed | TMEM52B          | protein_cc chr12 | 10323141 | 10344400 | + | 3489  | 3.501193 | 0.27685  | -0.34108 | 0.14726  | -2.31616 | 0.022612 | 0.078312 | 1 |
| ENSG0000 | response | Inflamed | C1orf56          | protein_cc chr1  | 1.51E+08 | 1.51E+08 | + | 2331  | 116.8234 | 0        | -0.2388  | 0.103111 | -2.31595 | 0.022624 | 0.078343 | 1 |
| ENSG0000 | response | Inflamed | AC073621         | pseudoger chr17  | 17325995 | 17327018 | + | 1024  | 1.465394 | 0.732697 | -0.3591  | 0.155088 | -2.31548 | 0.02265  | 0.078425 | 1 |

|                   |          |                     |       |          |          |   |      |          |          |          |          |          |          |          |   |
|-------------------|----------|---------------------|-------|----------|----------|---|------|----------|----------|----------|----------|----------|----------|----------|---|
| ENSG0000 response | Inflamed | TRBV29-1 TR_V_gene  | chr7  | 1.42E+08 | 1.42E+08 | + | 402  | 35.77327 | 0.00716  | -0.49071 | 0.211935 | -2.31536 | 0.022657 | 0.078433 | 1 |
| ENSG0000 response | Inflamed | AC156455 processed  | chr12 | 1.23E+08 | 1.23E+08 | + | 1831 | 29.27924 | 0.002387 | 0.335356 | 0.144843 | 2.315305 | 0.02266  | 0.078433 | 1 |
| ENSG0000 response | Inflamed | AURKC protein_cc    | chr19 | 57742377 | 57746916 | + | 1741 | 32.01432 | 0        | -0.23627 | 0.10205  | -2.31528 | 0.022662 | 0.078433 | 1 |
| ENSG0000 response | Inflamed | IL23R protein_cc    | chr1  | 67632083 | 67725662 | + | 2995 | 36.15274 | 0.002387 | 0.419383 | 0.181146 | 2.315173 | 0.022668 | 0.078444 | 1 |
| ENSG0000 response | Inflamed | CTBP1-AS2 antisense | chr4  | 1243088  | 1282079  | + | 7820 | 708.5609 | 0        | -0.2198  | 0.09494  | -2.31511 | 0.022671 | 0.078445 | 1 |
| ENSG0000 response | Inflamed | RP11-218E lincRNA   | chr14 | 51422977 | 51428720 | - | 4714 | 2.687351 | 0.448687 | -0.33729 | 0.145729 | -2.3145  | 0.022706 | 0.078548 | 1 |
| ENSG0000 response | Inflamed | CARD16 protein_cc   | chr11 | 1.05E+08 | 1.05E+08 | - | 1688 | 713.8974 | 0        | -0.34765 | 0.150208 | -2.31449 | 0.022707 | 0.078548 | 1 |
| ENSG0000 response | Inflamed | RP11-106C antisense | chr15 | 63124323 | 63176233 | - | 4086 | 13.19093 | 0.088305 | 0.55661  | 0.240535 | 2.314054 | 0.022732 | 0.078624 | 1 |
| ENSG0000 response | Inflamed | SHISA8 protein_cc   | chr22 | 42307297 | 42310570 | - | 486  | 3.990453 | 0.403341 | -0.39777 | 0.17193  | -2.31358 | 0.022759 | 0.078707 | 1 |
| ENSG0000 response | Inflamed | LRRC18 protein_cc   | chr10 | 50117528 | 50143242 | - | 1784 | 15.11695 | 0.064439 | 0.512661 | 0.221606 | 2.313385 | 0.02277  | 0.07872  | 1 |
| ENSG0000 response | Inflamed | TMEM170 protein_cc  | chr16 | 75476952 | 75499395 | - | 5572 | 1567.919 | 0        | 0.383372 | 0.165721 | 2.313351 | 0.022772 | 0.07872  | 1 |
| ENSG0000 response | Inflamed | SCAP protein_cc     | chr3  | 47455203 | 47518616 | - | 6282 | 5458.253 | 0        | 0.212788 | 0.091984 | 2.31331  | 0.022774 | 0.07872  | 1 |
| ENSG0000 response | Inflamed | LMAN2L protein_cc   | chr2  | 97371666 | 97405801 | - | 2709 | 677.6563 | 0        | 0.19906  | 0.08605  | 2.313305 | 0.022775 | 0.07872  | 1 |
| ENSG0000 response | Inflamed | RP11-495F lincRNA   | chr1  | 1.48E+08 | 1.48E+08 | + | 1800 | 0.909308 | 0.77327  | 0.21904  | 0.094691 | 2.313211 | 0.02278  | 0.078728 | 1 |
| ENSG0000 response | Inflamed | HIGD1AP1 pseudoger  | chr12 | 53535837 | 53536111 | + | 275  | 5.494033 | 0.150358 | 0.364266 | 0.157508 | 2.31268  | 0.02281  | 0.078823 | 1 |
| ENSG0000 response | Inflamed | PNPLA2 protein_cc   | chr11 | 818902   | 825573   | + | 3843 | 5967.986 | 0        | 0.23392  | 0.101153 | 2.312537 | 0.022819 | 0.078841 | 1 |
| ENSG0000 response | Inflamed | RP11-883A lincRNA   | chr18 | 10594587 | 10604795 | + | 855  | 4.785203 | 0.27685  | -0.36729 | 0.158851 | -2.31217 | 0.02284  | 0.078901 | 1 |
| ENSG0000 response | Inflamed | IGHA2 IG_C_gene     | chr14 | 1.06E+08 | 1.06E+08 | - | 1071 | 355453.9 | 0        | -0.59815 | 0.258699 | -2.31213 | 0.022842 | 0.078901 | 1 |
| ENSG0000 response | Inflamed | FGF13-AS1 antisense | chrX  | 1.38E+08 | 1.38E+08 | + | 1145 | 0.976134 | 0.73031  | -0.25661 | 0.110985 | -2.31207 | 0.022845 | 0.078902 | 1 |
| ENSG0000 response | Inflamed | REG1A protein_cc    | chr2  | 79347488 | 79350545 | + | 1725 | 18254.48 | 0.00716  | -1.67723 | 0.725513 | -2.31179 | 0.022862 | 0.078939 | 1 |
| ENSG0000 response | Inflamed | EMC7 protein_cc     | chr15 | 34376218 | 34394149 | - | 1538 | 1217.668 | 0        | -0.1712  | 0.074055 | -2.31178 | 0.022862 | 0.078939 | 1 |
| ENSG0000 response | Inflamed | NPEPL1 protein_cc   | chr20 | 57264187 | 57294294 | + | 7641 | 537.3437 | 0        | -0.25284 | 0.109386 | -2.31148 | 0.022879 | 0.07898  | 1 |
| ENSG0000 response | Inflamed | AC135048 protein_cc | chr16 | 30996808 | 30997533 | - | 726  | 1.183771 | 0.71599  | -0.23962 | 0.103669 | -2.31144 | 0.022882 | 0.07898  | 1 |
| ENSG0000 response | Inflamed | TTC19 protein_cc    | chr17 | 15902694 | 15948329 | + | 5966 | 1965.31  | 0        | 0.318964 | 0.137995 | 2.311417 | 0.022883 | 0.07898  | 1 |
| ENSG0000 response | Inflamed | POLB protein_cc     | chr8  | 42195972 | 42229326 | + | 4106 | 262.2458 | 0        | -0.23189 | 0.100335 | -2.31119 | 0.022896 | 0.079014 | 1 |
| ENSG0000 response | Inflamed | RBFADN processed    | chr18 | 77806900 | 77853362 | + | 6623 | 27.64916 | 0.023866 | 0.455339 | 0.197027 | 2.311044 | 0.022904 | 0.079033 | 1 |
| ENSG0000 response | Inflamed | IFNAR1 protein_cc   | chr21 | 34696734 | 34732168 | + | 6349 | 2197.754 | 0        | -0.31107 | 0.134633 | -2.31052 | 0.022935 | 0.079127 | 1 |
| ENSG0000 response | Inflamed | RP11-348M antisense | chr10 | 1.13E+08 | 1.13E+08 | + | 1649 | 28.02387 | 0.073986 | 0.621221 | 0.26891  | 2.310145 | 0.022956 | 0.079191 | 1 |
| ENSG0000 response | Inflamed | CALM2P2 pseudoger   | chr10 | 71923441 | 71923880 | + | 440  | 3.088305 | 0.303103 | 0.301077 | 0.130334 | 2.31005  | 0.022962 | 0.0792   | 1 |
| ENSG0000 response | Inflamed | KLC2 protein_cc     | chr11 | 66024765 | 66035331 | + | 5479 | 1008.415 | 0        | -0.27796 | 0.120336 | -2.30982 | 0.022975 | 0.079235 | 1 |
| ENSG0000 response | Inflamed | ADTRP protein_cc    | chr6  | 11712287 | 11807279 | - | 4150 | 2704.589 | 0        | 0.504175 | 0.218288 | 2.309683 | 0.022983 | 0.079252 | 1 |
| ENSG0000 response | Inflamed | CDH7 protein_cc     | chr18 | 63417488 | 63548638 | + | 5593 | 2.252983 | 0.670644 | 0.447595 | 0.1938   | 2.309569 | 0.022989 | 0.079264 | 1 |
| ENSG0000 response | Inflamed | HSPB2 protein_cc    | chr11 | 1.12E+08 | 1.12E+08 | + | 1508 | 8.057279 | 0.059666 | -0.4203  | 0.181997 | -2.30937 | 0.023001 | 0.079293 | 1 |
| ENSG0000 response | Inflamed | RP11-103E lincRNA   | chr11 | 59036349 | 59051506 | - | 2805 | 17.1432  | 0.121718 | 0.637296 | 0.275984 | 2.309178 | 0.023012 | 0.079321 | 1 |
| ENSG0000 response | Inflamed | TMC7 protein_cc     | chr16 | 18995256 | 19075264 | + | 5638 | 659.8234 | 0        | 0.369321 | 0.159963 | 2.308784 | 0.023035 | 0.079389 | 1 |
| ENSG0000 response | Inflamed | RP11-545A sense     | chr1  | 1.8E+08  | 1.8E+08  | + | 934  | 1.00716  | 0.720764 | 0.24678  | 0.106893 | 2.308655 | 0.023042 | 0.079405 | 1 |
| ENSG0000 response | Inflamed | GCAT protein_cc     | chr22 | 38203912 | 38213183 | + | 2102 | 442.0239 | 0        | 0.208553 | 0.090338 | 2.30858  | 0.023046 | 0.079409 | 1 |
| ENSG0000 response | Inflamed | LILRP2 pseudoger    | chr19 | 55219700 | 55224955 | + | 2127 | 7.312649 | 0.212411 | 0.435808 | 0.188791 | 2.308409 | 0.023056 | 0.079431 | 1 |
| ENSG0000 response | Inflamed | LINC0090C lincRNA   | chr11 | 1.16E+08 | 1.16E+08 | - | 4766 | 39.4821  | 0.004773 | -0.30582 | 0.132484 | -2.30836 | 0.023059 | 0.079431 | 1 |
| ENSG0000 response | Inflamed | THAP10 protein_cc   | chr15 | 71173681 | 71185124 | - | 2399 | 80.6778  | 0.002387 | 0.272865 | 0.118247 | 2.307582 | 0.023104 | 0.079577 | 1 |



|                   |          |                    |                  |          |          |   |       |          |          |          |          |          |          |          |   |
|-------------------|----------|--------------------|------------------|----------|----------|---|-------|----------|----------|----------|----------|----------|----------|----------|---|
| ENSG0000 response | Inflamed | DENND5B- antisense | chr12            | 31742857 | 31768600 | + | 1308  | 1.589499 | 0.601432 | -0.28611 | 0.124027 | -2.30685 | 0.023147 | 0.079712 | 1 |
| ENSG0000 response | Inflamed | IQGAP2             | protein_cc chr5  | 75699074 | 76003957 | + | 7904  | 2441.351 | 0        | 0.419659 | 0.181951 | 2.306443 | 0.02317  | 0.079784 | 1 |
| ENSG0000 response | Inflamed | AC079781           | pseudoger chr7   | 97567751 | 97568106 | - | 356   | 1.298329 | 0.646778 | -0.22783 | 0.098786 | -2.3063  | 0.023179 | 0.079802 | 1 |
| ENSG0000 response | Inflamed | HOXA13             | protein_cc chr7  | 27233122 | 27239725 | - | 4664  | 1290.375 | 0.01432  | 0.542852 | 0.235386 | 2.306221 | 0.023183 | 0.079807 | 1 |
| ENSG0000 response | Inflamed | SLC25A5P:          | pseudoger chr7   | 54487137 | 54488021 | + | 885   | 0.873508 | 0.789976 | 0.173668 | 0.07532  | 2.305726 | 0.023212 | 0.079896 | 1 |
| ENSG0000 response | Inflamed | SLC34A3            | protein_cc chr9  | 1.4E+08  | 1.4E+08  | + | 2303  | 24.05489 | 0.74463  | 0.482618 | 0.209323 | 2.30561  | 0.023219 | 0.079909 | 1 |
| ENSG0000 response | Inflamed | RPS3AP6            | pseudoger chr15  | 60060543 | 60061347 | + | 805   | 56.46301 | 0        | 0.308016 | 0.133598 | 2.305533 | 0.023223 | 0.079914 | 1 |
| ENSG0000 response | Inflamed | HIST2H2A(          | protein_cc chr1  | 1.5E+08  | 1.5E+08  | + | 437   | 11.08115 | 0.026253 | -0.34744 | 0.150717 | -2.30527 | 0.023239 | 0.079956 | 1 |
| ENSG0000 response | Inflamed | RP1-228P1          | protein_cc chr12 | 48413554 | 48419165 | - | 962   | 0.854415 | 0.787589 | 0.195925 | 0.084995 | 2.305135 | 0.023247 | 0.079973 | 1 |
| ENSG0000 response | Inflamed | JAKMIP3            | protein_cc chr10 | 1.34E+08 | 1.34E+08 | + | 7608  | 19.57518 | 0.040573 | -0.44768 | 0.194264 | -2.30448 | 0.023285 | 0.080093 | 1 |
| ENSG0000 response | Inflamed | TRAV12-3           | TR_V_gen( chr14  | 22433680 | 22434290 | + | 399   | 15.89021 | 0.052506 | -0.46598 | 0.202241 | -2.30408 | 0.023308 | 0.080163 | 1 |
| ENSG0000 response | Inflamed | C2orf47            | protein_cc chr2  | 2.01E+08 | 2.01E+08 | + | 1624  | 454.7327 | 0        | 0.209813 | 0.091069 | 2.303891 | 0.023319 | 0.080191 | 1 |
| ENSG0000 response | Inflamed | AF127936.          | lincRNA chr21    | 16134031 | 16135411 | - | 695   | 19.47255 | 0.023866 | -0.47311 | 0.205368 | -2.30371 | 0.02333  | 0.080217 | 1 |
| ENSG0000 response | Inflamed | EPHA1              | protein_cc chr7  | 1.43E+08 | 1.43E+08 | - | 4733  | 886.7494 | 0        | 0.398569 | 0.173063 | 2.303028 | 0.02337  | 0.080343 | 1 |
| ENSG0000 response | Inflamed | PITPNM3            | protein_cc chr17 | 6354584  | 6459814  | - | 10609 | 2150.611 | 0        | 0.407847 | 0.177111 | 2.30278  | 0.023384 | 0.080383 | 1 |
| ENSG0000 response | Inflamed | RP13-122E          | sense_ove chr9   | 1.4E+08  | 1.4E+08  | - | 1854  | 106.4344 | 0        | 0.312301 | 0.135693 | 2.301524 | 0.023458 | 0.080626 | 1 |
| ENSG0000 response | Inflamed | C9orf172           | protein_cc chr9  | 1.4E+08  | 1.4E+08  | + | 2931  | 118.42   | 0.016706 | 0.397156 | 0.172567 | 2.301457 | 0.023462 | 0.080629 | 1 |
| ENSG0000 response | Inflamed | PBX2P1             | pseudoger chr3   | 1.43E+08 | 1.43E+08 | + | 2181  | 10.91169 | 0.0358   | -0.26048 | 0.113207 | -2.30087 | 0.023496 | 0.080737 | 1 |
| ENSG0000 response | Inflamed | MCOLN2             | protein_cc chr1  | 85391268 | 85462796 | - | 3440  | 463.2673 | 0.002387 | 0.514653 | 0.223706 | 2.30058  | 0.023513 | 0.080785 | 1 |
| ENSG0000 response | Inflamed | HHLA3              | protein_cc chr1  | 70820488 | 70851022 | + | 1222  | 169.9952 | 0        | -0.19473 | 0.084655 | -2.30031 | 0.023529 | 0.080828 | 1 |
| ENSG0000 response | Inflamed | MAMSTR             | protein_cc chr19 | 49215999 | 49222978 | - | 2265  | 35.35084 | 0.002387 | -0.3166  | 0.13764  | -2.30018 | 0.023537 | 0.08084  | 1 |
| ENSG0000 response | Inflamed | TMC6               | protein_cc chr17 | 76106539 | 76128488 | - | 8669  | 4255.186 | 0        | -0.24652 | 0.107176 | -2.30015 | 0.023539 | 0.08084  | 1 |
| ENSG0000 response | Inflamed | AC114812           | pseudoger chr2   | 2.35E+08 | 2.35E+08 | + | 757   | 1.260143 | 0.704057 | 0.259722 | 0.112923 | 2.299984 | 0.023548 | 0.080863 | 1 |
| ENSG0000 response | Inflamed | INTS4L1            | pseudoger chr7   | 64601603 | 64694600 | + | 2553  | 10.88544 | 0.186158 | 0.44068  | 0.19163  | 2.299644 | 0.023568 | 0.080915 | 1 |
| ENSG0000 response | Inflamed | COLQ               | protein_cc chr3  | 15491640 | 15563258 | - | 4353  | 99.48449 | 0.002387 | -0.36549 | 0.158934 | -2.29962 | 0.02357  | 0.080915 | 1 |
| ENSG0000 response | Inflamed | APOL4              | protein_cc chr22 | 36585172 | 36600886 | - | 4375  | 384.5585 | 0        | -0.38196 | 0.166106 | -2.29952 | 0.023576 | 0.080924 | 1 |
| ENSG0000 response | Inflamed | SIGLEC6            | protein_cc chr19 | 52022779 | 52035110 | - | 2573  | 110.0358 | 0.009547 | -0.47296 | 0.205704 | -2.29923 | 0.023593 | 0.08097  | 1 |
| ENSG0000 response | Inflamed | CTD-2523(          | antisense chr11  | 1.2E+08  | 1.2E+08  | + | 523   | 11.05251 | 0.033413 | 0.355314 | 0.154539 | 2.299194 | 0.023595 | 0.08097  | 1 |
| ENSG0000 response | Inflamed | UQCRB              | protein_cc chr8  | 97238148 | 97247862 | - | 9715  | 3616.251 | 0        | 0.25673  | 0.111673 | 2.298944 | 0.02361  | 0.08101  | 1 |
| ENSG0000 response | Inflamed | GFPT1              | protein_cc chr2  | 69546905 | 69614382 | - | 8858  | 8206.465 | 0        | 0.37651  | 0.163793 | 2.298695 | 0.023625 | 0.08105  | 1 |
| ENSG0000 response | Inflamed | FAM47E-S'          | protein_cc chr4  | 77172886 | 77232752 | + | 4003  | 132.4129 | 0.002387 | 0.411019 | 0.178828 | 2.298409 | 0.023641 | 0.081098 | 1 |
| ENSG0000 response | Inflamed | MRPL28             | protein_cc chr16 | 417384   | 420527   | - | 2404  | 1281.945 | 0        | -0.16713 | 0.07273  | -2.29792 | 0.02367  | 0.081185 | 1 |
| ENSG0000 response | Inflamed | ARHGAP32           | protein_cc chr11 | 1.29E+08 | 1.29E+08 | - | 12841 | 3938.699 | 0        | 0.426248 | 0.1855   | 2.297826 | 0.023676 | 0.081195 | 1 |
| ENSG0000 response | Inflamed | OMG                | protein_cc chr17 | 29599031 | 29624557 | - | 3837  | 6.754177 | 0.145585 | -0.42855 | 0.186522 | -2.29756 | 0.023691 | 0.081238 | 1 |
| ENSG0000 response | Inflamed | RP11-468(          | lincRNA chr8     | 16988690 | 17007298 | + | 2292  | 1.403341 | 0.639618 | -0.29966 | 0.130436 | -2.29735 | 0.023704 | 0.081271 | 1 |
| ENSG0000 response | Inflamed | C17orf50           | protein_cc chr17 | 34087916 | 34092098 | + | 1063  | 1.53222  | 0.591885 | 0.207298 | 0.090251 | 2.296899 | 0.023731 | 0.081352 | 1 |
| ENSG0000 response | Inflamed | AC005841           | protein_cc chr12 | 2958397  | 2966213  | - | 939   | 1.119332 | 0.73747  | 0.240503 | 0.104714 | 2.296755 | 0.023739 | 0.081357 | 1 |
| ENSG0000 response | Inflamed | LINC0047(          | processed_chr9   | 98521513 | 98638259 | - | 5100  | 142.0764 | 0        | 0.269468 | 0.117327 | 2.296727 | 0.023741 | 0.081357 | 1 |
| ENSG0000 response | Inflamed | DTX2P1             | pseudoger chr7   | 76607934 | 76673092 | + | 2957  | 127.494  | 0.01432  | 0.417252 | 0.181673 | 2.296716 | 0.023742 | 0.081357 | 1 |
| ENSG0000 response | Inflamed | TRAV12-2           | TR_V_gen( chr14  | 22356037 | 22356682 | + | 445   | 21.18854 | 0.038186 | -0.41657 | 0.181408 | -2.29629 | 0.023767 | 0.081432 | 1 |

|                   |          |            |                  |          |          |   |       |          |          |          |          |          |          |          |   |
|-------------------|----------|------------|------------------|----------|----------|---|-------|----------|----------|----------|----------|----------|----------|----------|---|
| ENSG0000 response | Inflamed | ZNF215     | protein_cc chr11 | 6947635  | 7005863  | + | 4025  | 205.0811 | 0        | -0.46596 | 0.202925 | -2.29624 | 0.02377  | 0.081433 | 1 |
| ENSG0000 response | Inflamed | NDUFB5     | protein_cc chr3  | 1.79E+08 | 1.79E+08 | + | 5871  | 1362.69  | 0        | 0.227745 | 0.09919  | 2.296034 | 0.023782 | 0.081447 | 1 |
| ENSG0000 response | Inflamed | F11R       | protein_cc chr1  | 1.61E+08 | 1.61E+08 | - | 5066  | 6264.952 | 0        | 0.288228 | 0.125534 | 2.296018 | 0.023783 | 0.081447 | 1 |
| ENSG0000 response | Inflamed | AC093388   | antisense chr2   | 1.91E+08 | 1.91E+08 | + | 404   | 7.804296 | 0.031026 | 0.291466 | 0.126946 | 2.295984 | 0.023785 | 0.081447 | 1 |
| ENSG0000 response | Inflamed | ATP5C1P1   | pseudoger chr14  | 54457819 | 54458713 | - | 895   | 1.813842 | 0.522673 | 0.251434 | 0.109512 | 2.295961 | 0.023787 | 0.081447 | 1 |
| ENSG0000 response | Inflamed | PAIP2      | protein_cc chr5  | 1.39E+08 | 1.39E+08 | + | 3155  | 1239.296 | 0        | -0.22101 | 0.096267 | -2.29583 | 0.023795 | 0.081464 | 1 |
| ENSG0000 response | Inflamed | ERICH2     | protein_cc chr2  | 1.72E+08 | 1.72E+08 | + | 601   | 4.570406 | 0.212411 | -0.3338  | 0.145401 | -2.29572 | 0.023801 | 0.081475 | 1 |
| ENSG0000 response | Inflamed | NPTXR      | protein_cc chr22 | 39214457 | 39239987 | - | 5784  | 152.6826 | 0.02148  | -0.61455 | 0.267744 | -2.29529 | 0.023827 | 0.081552 | 1 |
| ENSG0000 response | Inflamed | PXT1       | protein_cc chr6  | 36358328 | 36410666 | - | 2108  | 0.859189 | 0.782816 | -0.23107 | 0.100681 | -2.29504 | 0.023842 | 0.081593 | 1 |
| ENSG0000 response | Inflamed | CELP       | pseudoger chr9   | 1.36E+08 | 1.36E+08 | + | 1249  | 25.79475 | 0.319809 | 0.686873 | 0.299309 | 2.294863 | 0.023852 | 0.081618 | 1 |
| ENSG0000 response | Inflamed | HLA-DPA3   | pseudoger chr6   | 33098993 | 33111102 | - | 229   | 2.742243 | 0.541766 | -0.42308 | 0.184367 | -2.29479 | 0.023856 | 0.081622 | 1 |
| ENSG0000 response | Inflamed | PSMD4      | protein_cc chr1  | 1.51E+08 | 1.51E+08 | + | 3027  | 2666.943 | 0        | -0.13463 | 0.058671 | -2.29469 | 0.023862 | 0.081632 | 1 |
| ENSG0000 response | Inflamed | JPH1       | protein_cc chr8  | 75146935 | 75233563 | - | 4378  | 598.5012 | 0        | 0.44329  | 0.193193 | 2.294551 | 0.023871 | 0.08165  | 1 |
| ENSG0000 response | Inflamed | WWC3       | protein_cc chrX  | 9983602  | 10112518 | + | 7114  | 1781.666 | 0        | -0.29798 | 0.129881 | -2.29428 | 0.023887 | 0.08169  | 1 |
| ENSG0000 response | Inflamed | MED30      | protein_cc chr8  | 1.19E+08 | 1.19E+08 | + | 1440  | 247.1193 | 0        | 0.182745 | 0.079654 | 2.294247 | 0.023889 | 0.08169  | 1 |
| ENSG0000 response | Inflamed | RP11-731F  | lincRNA chr14    | 1.06E+08 | 1.06E+08 | - | 930   | 18.358   | 0.140811 | -0.6179  | 0.26936  | -2.29394 | 0.023907 | 0.081742 | 1 |
| ENSG0000 response | Inflamed | CNST       | protein_cc chr1  | 2.47E+08 | 2.47E+08 | + | 5922  | 1181.771 | 0        | 0.393084 | 0.171384 | 2.293584 | 0.023928 | 0.081805 | 1 |
| ENSG0000 response | Inflamed | SLC25A42   | protein_cc chr19 | 19174808 | 19223697 | + | 4519  | 665.6659 | 0        | -0.28633 | 0.124843 | -2.29352 | 0.023932 | 0.081808 | 1 |
| ENSG0000 response | Inflamed | AKR1C7P    | pseudoger chr10  | 5317136  | 5330433  | - | 895   | 1.823389 | 0.52506  | -0.28594 | 0.124689 | -2.29325 | 0.023948 | 0.081851 | 1 |
| ENSG0000 response | Inflamed | RP11-6771  | pseudoger chr11  | 14695152 | 14696101 | - | 950   | 2.183771 | 0.436754 | -0.27226 | 0.118729 | -2.29308 | 0.023958 | 0.081875 | 1 |
| ENSG0000 response | Inflamed | CCL13      | protein_cc chr17 | 32683471 | 32685629 | + | 851   | 318.21   | 0        | -0.60903 | 0.265659 | -2.29253 | 0.023992 | 0.081978 | 1 |
| ENSG0000 response | Inflamed | SDCBP2-AS1 | antisense chr20  | 1306049  | 1359378  | + | 4058  | 52.69928 | 0        | -0.32693 | 0.142621 | -2.29227 | 0.024007 | 0.08202  | 1 |
| ENSG0000 response | Inflamed | MLTK       | protein_cc chr2  | 1.74E+08 | 1.74E+08 | + | 13799 | 910.8616 | 0        | -0.44605 | 0.194657 | -2.29149 | 0.024054 | 0.08217  | 1 |
| ENSG0000 response | Inflamed | SEL1L      | protein_cc chr14 | 81937893 | 82000205 | - | 9559  | 6323.947 | 0        | -0.40056 | 0.174864 | -2.29068 | 0.024102 | 0.082325 | 1 |
| ENSG0000 response | Inflamed | TWSG1      | protein_cc chr18 | 9334765  | 9402418  | + | 4435  | 810.5418 | 0        | -0.40685 | 0.177614 | -2.29062 | 0.024106 | 0.082326 | 1 |
| ENSG0000 response | Inflamed | MT-TG      | Mt_tRNA chrM     | 9991     | 10058    | + | 68    | 9.033413 | 0.100239 | 0.429413 | 0.18749  | 2.290317 | 0.024124 | 0.082378 | 1 |
| ENSG0000 response | Inflamed | PRKAB1     | protein_cc chr12 | 1.2E+08  | 1.2E+08  | + | 6246  | 3104.621 | 0        | 0.214845 | 0.093818 | 2.290023 | 0.024142 | 0.082428 | 1 |
| ENSG0000 response | Inflamed | RP11-44N1  | lincRNA chr8     | 99955823 | 99956326 | + | 504   | 1.479714 | 0.687351 | -0.30406 | 0.132782 | -2.28993 | 0.024148 | 0.082437 | 1 |
| ENSG0000 response | Inflamed | MINK1      | protein_cc chr17 | 4736683  | 4801356  | + | 7817  | 11429.43 | 0        | 0.268499 | 0.117256 | 2.289858 | 0.024152 | 0.082441 | 1 |
| ENSG0000 response | Inflamed | DCST2      | protein_cc chr1  | 1.55E+08 | 1.55E+08 | - | 3071  | 53.87589 | 0.004773 | 0.466525 | 0.203746 | 2.28974  | 0.024159 | 0.082454 | 1 |
| ENSG0000 response | Inflamed | PDLIM1     | protein_cc chr10 | 96997329 | 97050781 | - | 2239  | 13442.46 | 0        | 0.175951 | 0.076855 | 2.289382 | 0.024181 | 0.082517 | 1 |
| ENSG0000 response | Inflamed | CTB-78O2   | pseudoger chr5   | 1.45E+08 | 1.45E+08 | - | 876   | 19.41289 | 0.128878 | 0.605193 | 0.264368 | 2.289203 | 0.024192 | 0.082543 | 1 |
| ENSG0000 response | Inflamed | UBASH3A    | protein_cc chr21 | 43824008 | 43867791 | + | 3564  | 173.401  | 0        | -0.36971 | 0.161518 | -2.28901 | 0.024203 | 0.082573 | 1 |
| ENSG0000 response | Inflamed | RP11-3091  | antisense chr17  | 72966799 | 72971823 | + | 815   | 7.329356 | 0.105012 | -0.3488  | 0.152386 | -2.28891 | 0.024209 | 0.082582 | 1 |
| ENSG0000 response | Inflamed | FCRL1      | protein_cc chr1  | 1.58E+08 | 1.58E+08 | - | 3935  | 246.895  | 0.026253 | -0.87559 | 0.382561 | -2.28877 | 0.024218 | 0.0826   | 1 |
| ENSG0000 response | Inflamed | ELOVL1     | protein_cc chr1  | 43829068 | 43833696 | - | 2458  | 4602.885 | 0        | 0.156675 | 0.068456 | 2.288697 | 0.024222 | 0.082605 | 1 |
| ENSG0000 response | Inflamed | ELANE      | protein_cc chr19 | 851014   | 856242   | + | 1023  | 22.18138 | 0.00716  | 0.356975 | 0.155983 | 2.288551 | 0.024231 | 0.082624 | 1 |
| ENSG0000 response | Inflamed | GMPPA      | protein_cc chr2  | 2.2E+08  | 2.2E+08  | + | 5331  | 2556.453 | 0        | -0.13329 | 0.058242 | -2.28848 | 0.024235 | 0.082629 | 1 |
| ENSG0000 response | Inflamed | NR2F1-AS1  | processed_chr5   | 92745065 | 92921354 | - | 7720  | 86.04296 | 0        | -0.41777 | 0.182559 | -2.28841 | 0.02424  | 0.082633 | 1 |
| ENSG0000 response | Inflamed | RP11-197F  | antisense chr9   | 77567884 | 77611209 | + | 719   | 1.281623 | 0.658711 | 0.227258 | 0.099312 | 2.288319 | 0.024245 | 0.082638 | 1 |

|                   |          |           |                  |          |          |   |       |          |          |          |          |          |          |          |   |
|-------------------|----------|-----------|------------------|----------|----------|---|-------|----------|----------|----------|----------|----------|----------|----------|---|
| ENSG0000 response | Inflamed | L3MBTL2   | protein_cc chr22 | 41601209 | 41627275 | + | 6451  | 1537.542 | 0        | -0.18368 | 0.080271 | -2.28828 | 0.024247 | 0.082638 | 1 |
| ENSG0000 response | Inflamed | MEP1AP4   | pseudoger chr9   | 44147906 | 44154014 | + | 1087  | 8.102625 | 0.281623 | 0.463044 | 0.202377 | 2.288024 | 0.024263 | 0.082679 | 1 |
| ENSG0000 response | Inflamed | KRTAP5-1C | protein_cc chr11 | 71276609 | 71279980 | + | 1130  | 1.632458 | 0.603819 | 0.240594 | 0.10516  | 2.28788  | 0.024272 | 0.082698 | 1 |
| ENSG0000 response | Inflamed | EPPK1     | protein_cc chr8  | 1.45E+08 | 1.45E+08 | - | 7997  | 2688.556 | 0        | 0.463448 | 0.202593 | 2.287583 | 0.02429  | 0.082745 | 1 |
| ENSG0000 response | Inflamed | ARRDC3    | protein_cc chr5  | 90664541 | 90679176 | - | 4934  | 1355.983 | 0        | -0.42882 | 0.187459 | -2.28755 | 0.024292 | 0.082745 | 1 |
| ENSG0000 response | Inflamed | RP11-834C | antisense chr12  | 54556923 | 54562379 | + | 403   | 0.792363 | 0.787589 | 0.208489 | 0.091148 | 2.287377 | 0.024302 | 0.08277  | 1 |
| ENSG0000 response | Inflamed | RP5-850O  | lincRNA chr1     | 50902700 | 50902978 | - | 279   | 3.77327  | 0.260143 | 0.343505 | 0.150183 | 2.287246 | 0.02431  | 0.082786 | 1 |
| ENSG0000 response | Inflamed | PDZD11    | protein_cc chrX  | 69506445 | 69510364 | - | 1393  | 749.9976 | 0        | 0.23288  | 0.101829 | 2.286969 | 0.024327 | 0.082829 | 1 |
| ENSG0000 response | Inflamed | CTD-2555C | lincRNA chr14    | 1.03E+08 | 1.03E+08 | + | 1603  | 86.30072 | 0.004773 | -0.58903 | 0.257561 | -2.28693 | 0.024329 | 0.082829 | 1 |
| ENSG0000 response | Inflamed | R3HDM1    | protein_cc chr2  | 1.36E+08 | 1.36E+08 | + | 7898  | 1080.446 | 0        | -0.28505 | 0.124658 | -2.28663 | 0.024347 | 0.082881 | 1 |
| ENSG0000 response | Inflamed | RP11-112J | lincRNA chr9     | 35772160 | 35790429 | + | 952   | 30.9642  | 0.019093 | 0.487563 | 0.213254 | 2.2863   | 0.024367 | 0.082939 | 1 |
| ENSG0000 response | Inflamed | ARMC4     | protein_cc chr10 | 28064115 | 28287977 | - | 5697  | 5.591885 | 0.272076 | -0.43646 | 0.190914 | -2.28618 | 0.024375 | 0.082953 | 1 |
| ENSG0000 response | Inflamed | NPY6R     | pseudoger chr5   | 1.37E+08 | 1.37E+08 | + | 2988  | 242.8258 | 0.002387 | 0.608887 | 0.266345 | 2.286084 | 0.024381 | 0.082962 | 1 |
| ENSG0000 response | Inflamed | RP11-944C | protein_cc chr14 | 90095265 | 90109015 | - | 1122  | 1.794749 | 0.639618 | 0.221265 | 0.096815 | 2.285443 | 0.024419 | 0.083084 | 1 |
| ENSG0000 response | Inflamed | RP11-982M | lincRNA chr14    | 1.05E+08 | 1.05E+08 | - | 723   | 2.193317 | 0.494033 | 0.282452 | 0.123594 | 2.285324 | 0.024427 | 0.083098 | 1 |
| ENSG0000 response | Inflamed | VPS4A     | protein_cc chr16 | 69345259 | 69358949 | + | 3777  | 2697.2   | 0        | 0.11129  | 0.0487   | 2.285208 | 0.024434 | 0.083111 | 1 |
| ENSG0000 response | Inflamed | RP11-195C | antisense chr1   | 1.76E+08 | 1.76E+08 | + | 579   | 4.463007 | 0.174224 | 0.300103 | 0.131341 | 2.284911 | 0.024452 | 0.083162 | 1 |
| ENSG0000 response | Inflamed | AP000350  | protein_cc chr22 | 24236613 | 24241117 | - | 1476  | 75.8401  | 0.102625 | 0.382941 | 0.167615 | 2.284643 | 0.024468 | 0.083206 | 1 |
| ENSG0000 response | Inflamed | PLA2G4F   | protein_cc chr15 | 42433332 | 42448839 | - | 4014  | 1751.031 | 0.002387 | 0.508527 | 0.222598 | 2.284508 | 0.024476 | 0.083224 | 1 |
| ENSG0000 response | Inflamed | MARK1     | protein_cc chr1  | 2.21E+08 | 2.21E+08 | + | 5371  | 123.1193 | 0.00716  | -0.41452 | 0.181459 | -2.28439 | 0.024484 | 0.083237 | 1 |
| ENSG0000 response | Inflamed | RP11-2E11 | lincRNA chr7     | 1.3E+08  | 1.3E+08  | - | 2902  | 3.494033 | 0.357995 | 0.342706 | 0.150103 | 2.28314  | 0.02456  | 0.083486 | 1 |
| ENSG0000 response | Inflamed | KRT79     | protein_cc chr12 | 53215194 | 53228079 | - | 2542  | 4.446301 | 0.494033 | -0.41507 | 0.181827 | -2.2828  | 0.024581 | 0.083546 | 1 |
| ENSG0000 response | Inflamed | DSCAM     | protein_cc chr21 | 41382926 | 42219065 | - | 8552  | 2        | 0.608592 | -0.36845 | 0.161422 | -2.28252 | 0.024598 | 0.083593 | 1 |
| ENSG0000 response | Inflamed | SLC30A3   | protein_cc chr2  | 27476552 | 27498685 | - | 5978  | 2.897375 | 0.427208 | -0.37111 | 0.162642 | -2.28178 | 0.024643 | 0.083736 | 1 |
| ENSG0000 response | Inflamed | LRP5L     | protein_cc chr22 | 25747385 | 25801344 | - | 4555  | 350.9141 | 0        | 0.371291 | 0.162739 | 2.281519 | 0.024659 | 0.08377  | 1 |
| ENSG0000 response | Inflamed | LINC00028 | lincRNA chr20    | 30073581 | 30075377 | + | 587   | 0.942721 | 0.763723 | -0.23873 | 0.104634 | -2.28152 | 0.024659 | 0.08377  | 1 |
| ENSG0000 response | Inflamed | TRAV13-2  | TR_V_gene chr14  | 22386363 | 22386931 | + | 410   | 9.279236 | 0.073986 | -0.36888 | 0.161687 | -2.28146 | 0.024663 | 0.083772 | 1 |
| ENSG0000 response | Inflamed | EOMES     | protein_cc chr3  | 27757440 | 27764206 | - | 3660  | 123.9905 | 0.011933 | -0.55095 | 0.241508 | -2.28129 | 0.024674 | 0.083797 | 1 |
| ENSG0000 response | Inflamed | TPP1      | protein_cc chr11 | 6634000  | 6640692  | - | 4895  | 10008.92 | 0        | -0.22497 | 0.098626 | -2.28106 | 0.024688 | 0.083834 | 1 |
| ENSG0000 response | Inflamed | LLGL1     | protein_cc chr17 | 18128901 | 18148189 | + | 6616  | 1197.943 | 0        | -0.28136 | 0.123353 | -2.28096 | 0.024693 | 0.083842 | 1 |
| ENSG0000 response | Inflamed | IFIT3     | protein_cc chr10 | 91087651 | 91100728 | + | 2640  | 622.8329 | 0        | -0.54628 | 0.239518 | -2.28075 | 0.024706 | 0.083876 | 1 |
| ENSG0000 response | Inflamed | SMCO2     | protein_cc chr12 | 27619743 | 27655118 | + | 1978  | 6.852029 | 0.24105  | -0.43477 | 0.190645 | -2.28054 | 0.02472  | 0.08391  | 1 |
| ENSG0000 response | Inflamed | LINC00846 | lincRNA chr21    | 33944548 | 33948191 | - | 1778  | 2.21957  | 0.46778  | -0.27943 | 0.122538 | -2.28035 | 0.024731 | 0.083939 | 1 |
| ENSG0000 response | Inflamed | ZNF676    | protein_cc chr19 | 22361893 | 22379753 | - | 2944  | 2.756563 | 0.448687 | -0.357   | 0.156575 | -2.28008 | 0.024748 | 0.083984 | 1 |
| ENSG0000 response | Inflamed | RNF130    | protein_cc chr5  | 1.79E+08 | 1.79E+08 | - | 12822 | 2257.033 | 0        | -0.15794 | 0.069273 | -2.27992 | 0.024757 | 0.084005 | 1 |
| ENSG0000 response | Inflamed | MIR7-3HG  | lincRNA chr19    | 4769117  | 4772545  | + | 1159  | 4.448687 | 0.221957 | 0.394671 | 0.173129 | 2.27963  | 0.024776 | 0.084056 | 1 |
| ENSG0000 response | Inflamed | ZFYVE27   | protein_cc chr10 | 99496878 | 99520664 | + | 4031  | 2455.294 | 0        | 0.219946 | 0.09649  | 2.279467 | 0.024786 | 0.084079 | 1 |
| ENSG0000 response | Inflamed | SNORA40   | snoRNA chr1      | 1.51E+08 | 1.51E+08 | - | 121   | 3.53222  | 0.303103 | 0.327443 | 0.143678 | 2.278998 | 0.024815 | 0.084166 | 1 |
| ENSG0000 response | Inflamed | ZNF259P1  | pseudoger chr6   | 1.09E+08 | 1.09E+08 | - | 4928  | 2.155131 | 0.505967 | 0.308202 | 0.135256 | 2.278664 | 0.024835 | 0.084226 | 1 |
| ENSG0000 response | Inflamed | RP11-525A | lincRNA chr10    | 1.12E+08 | 1.12E+08 | - | 628   | 1.479714 | 0.649165 | -0.32325 | 0.141865 | -2.27856 | 0.024841 | 0.084236 | 1 |

|                   |          |                     |            |          |          |          |      |          |          |          |          |          |          |          |          |   |
|-------------------|----------|---------------------|------------|----------|----------|----------|------|----------|----------|----------|----------|----------|----------|----------|----------|---|
| ENSG0000 response | Inflamed | RAP2C-AS1 antisense | chrX       | 1.31E+08 | 1.32E+08 | +        | 3536 | 42.00239 | 0.00716  | -0.28686 | 0.125907 | -2.27832 | 0.024857 | 0.084277 | 1        |   |
| ENSG0000 response | Inflamed | WASH7P              | pseudoger  | chr1     | 14363    | 29806    | -    | 2073     | 309.5131 | 0        | 0.18151  | 0.079671 | 2.278235 | 0.024862 | 0.084283 | 1 |
| ENSG0000 response | Inflamed | KIAA1586            | protein_cc | chr6     | 56911347 | 56920023 | +    | 3078     | 94.93795 | 0        | -0.39103 | 0.171658 | -2.27795 | 0.02488  | 0.084332 | 1 |
| ENSG0000 response | Inflamed | RP11-384F           | antisense  | chr9     | 33732973 | 33738414 | -    | 486      | 2.73031  | 0.415274 | 0.3006   | 0.132001 | 2.277256 | 0.024922 | 0.084466 | 1 |
| ENSG0000 response | Inflamed | MRGBP               | protein_cc | chr20    | 61427805 | 61431945 | +    | 1636     | 499.7232 | 0        | -0.13827 | 0.060724 | -2.27702 | 0.024937 | 0.084506 | 1 |
| ENSG0000 response | Inflamed | SLC25A20            | protein_cc | chr3     | 48894369 | 48936426 | -    | 1977     | 1303.802 | 0        | 0.223351 | 0.098093 | 2.276928 | 0.024943 | 0.084514 | 1 |
| ENSG0000 response | Inflamed | FAM163A             | protein_cc | chr1     | 1.8E+08  | 1.8E+08  | +    | 2909     | 85.53222 | 0.009547 | -0.44917 | 0.197321 | -2.27633 | 0.02498  | 0.084628 | 1 |
| ENSG0000 response | Inflamed | EME1                | protein_cc | chr17    | 48450581 | 48458844 | +    | 3294     | 77.08831 | 0.002387 | -0.37075 | 0.162912 | -2.27578 | 0.025014 | 0.084733 | 1 |
| ENSG0000 response | Inflamed | ZZEF1               | protein_cc | chr17    | 3907739  | 4046314  | -    | 15878    | 10446.92 | 0        | 0.286507 | 0.125902 | 2.275636 | 0.025023 | 0.084753 | 1 |
| ENSG0000 response | Inflamed | RP1-96H9            | pseudoger  | chr12    | 6379325  | 6379591  | -    | 267      | 0.816229 | 0.794749 | 0.175512 | 0.077137 | 2.275335 | 0.025042 | 0.084805 | 1 |
| ENSG0000 response | Inflamed | SPIRE1              | protein_cc | chr18    | 12446511 | 12658133 | -    | 6532     | 455.8067 | 0        | -0.40216 | 0.176809 | -2.27452 | 0.025092 | 0.084966 | 1 |
| ENSG0000 response | Inflamed | CTPS1               | protein_cc | chr1     | 41445007 | 41478235 | +    | 5749     | 872.1504 | 0        | -0.29543 | 0.129909 | -2.27414 | 0.025116 | 0.085035 | 1 |
| ENSG0000 response | Inflamed | BDNF-AS             | antisense  | chr11    | 27528385 | 27719721 | +    | 3726     | 39.5895  | 0.00716  | 0.362833 | 0.159572 | 2.27378  | 0.025138 | 0.085101 | 1 |
| ENSG0000 response | Inflamed | GALE                | protein_cc | chr1     | 24122089 | 24127271 | -    | 3955     | 4003.723 | 0        | 0.276388 | 0.121561 | 2.273654 | 0.025146 | 0.085113 | 1 |
| ENSG0000 response | Inflamed | TRABD               | protein_cc | chr22    | 50624344 | 50638027 | +    | 3153     | 3435.053 | 0        | -0.18991 | 0.08353  | -2.27358 | 0.025151 | 0.085113 | 1 |
| ENSG0000 response | Inflamed | KSR1                | protein_cc | chr17    | 25783670 | 25953461 | +    | 11817    | 1801.461 | 0        | -0.29455 | 0.129556 | -2.27357 | 0.025152 | 0.085113 | 1 |
| ENSG0000 response | Inflamed | RP11-4O1            | sense_ove  | chr9     | 1.15E+08 | 1.15E+08 | -    | 4836     | 188.2792 | 0        | 0.369921 | 0.16273  | 2.273223 | 0.025173 | 0.085175 | 1 |
| ENSG0000 response | Inflamed | ATG9B               | protein_cc | chr7     | 1.51E+08 | 1.51E+08 | -    | 6404     | 32.48687 | 0.016706 | -0.43288 | 0.190432 | -2.27314 | 0.025179 | 0.085182 | 1 |
| ENSG0000 response | Inflamed | RP11-521E           | antisense  | chr14    | 1.06E+08 | 1.06E+08 | -    | 2279     | 31.5537  | 0.01432  | -0.31749 | 0.139684 | -2.27294 | 0.025191 | 0.085213 | 1 |
| ENSG0000 response | Inflamed | SDC3                | protein_cc | chr1     | 31342314 | 31381608 | -    | 7067     | 4537.205 | 0        | -0.33777 | 0.148621 | -2.27271 | 0.025205 | 0.08525  | 1 |
| ENSG0000 response | Inflamed | ITLN2               | protein_cc | chr1     | 1.61E+08 | 1.61E+08 | -    | 1636     | 331.0859 | 0.078759 | 1.067514 | 0.469816 | 2.272197 | 0.025238 | 0.085348 | 1 |
| ENSG0000 response | Inflamed | SKA1                | protein_cc | chr18    | 47901365 | 47920543 | +    | 2950     | 197.7661 | 0        | -0.34772 | 0.153072 | -2.27158 | 0.025276 | 0.085467 | 1 |
| ENSG0000 response | Inflamed | SYNDIG1L            | protein_cc | chr14    | 74872596 | 74892805 | -    | 2612     | 6.28401  | 0.171838 | -0.3744  | 0.164853 | -2.27114 | 0.025304 | 0.085549 | 1 |
| ENSG0000 response | Inflamed | CTBP2P4             | pseudoger  | chr5     | 97912045 | 97912964 | +    | 920      | 3.023866 | 0.295943 | 0.299228 | 0.131765 | 2.270932 | 0.025317 | 0.085583 | 1 |
| ENSG0000 response | Inflamed | PSMC3IP             | protein_cc | chr17    | 40724333 | 40729849 | -    | 2573     | 126.4869 | 0        | -0.3018  | 0.132906 | -2.2708  | 0.025325 | 0.0856   | 1 |
| ENSG0000 response | Inflamed | POLH                | protein_cc | chr6     | 43543887 | 43586701 | +    | 3663     | 529.0597 | 0        | -0.28426 | 0.125196 | -2.2705  | 0.025344 | 0.085653 | 1 |
| ENSG0000 response | Inflamed | OSBPL1A             | protein_cc | chr18    | 21742008 | 21977844 | -    | 8022     | 835.4177 | 0        | 0.314974 | 0.138739 | 2.270261 | 0.025359 | 0.085693 | 1 |
| ENSG0000 response | Inflamed | RP3-523K2           | sense_ove  | chr6     | 54807965 | 54809897 | +    | 1933     | 268.3771 | 0.00716  | 0.531313 | 0.234148 | 2.269135 | 0.02543  | 0.085917 | 1 |
| ENSG0000 response | Inflamed | MKKN2               | protein_cc | chr19    | 2037470  | 2051243  | -    | 5275     | 11154.01 | 0        | 0.208107 | 0.091713 | 2.269104 | 0.025432 | 0.085917 | 1 |
| ENSG0000 response | Inflamed | CTC-548K1           | lincRNA    | chr19    | 14444555 | 14454725 | +    | 765      | 31.99761 | 0.009547 | 0.402485 | 0.177391 | 2.268922 | 0.025443 | 0.085945 | 1 |
| ENSG0000 response | Inflamed | AP2M1               | protein_cc | chr3     | 1.84E+08 | 1.84E+08 | +    | 4753     | 9104.317 | 0        | -0.12283 | 0.054141 | -2.26878 | 0.025452 | 0.085964 | 1 |
| ENSG0000 response | Inflamed | BCL3                | protein_cc | chr19    | 45250962 | 45263301 | +    | 3242     | 4723.692 | 0        | -0.28393 | 0.125164 | -2.26847 | 0.025472 | 0.086019 | 1 |
| ENSG0000 response | Inflamed | VPS9D1              | protein_cc | chr16    | 89773542 | 89787394 | -    | 3428     | 1068.005 | 0        | -0.26111 | 0.115119 | -2.26822 | 0.025488 | 0.086055 | 1 |
| ENSG0000 response | Inflamed | IDH1                | protein_cc | chr2     | 2.09E+08 | 2.09E+08 | -    | 4721     | 4530.905 | 0        | 0.32158  | 0.141778 | 2.268196 | 0.025489 | 0.086055 | 1 |
| ENSG0000 response | Inflamed | RP11-4161           | sense_intr | chr10    | 1.05E+08 | 1.05E+08 | +    | 524      | 1.553699 | 0.632458 | 0.313526 | 0.138232 | 2.268105 | 0.025495 | 0.086064 | 1 |
| ENSG0000 response | Inflamed | RP11-4731           | pseudoger  | chr4     | 42563474 | 42564442 | -    | 969      | 0.961814 | 0.74463  | 0.224718 | 0.099085 | 2.267939 | 0.025506 | 0.086088 | 1 |
| ENSG0000 response | Inflamed | CRTC3               | protein_cc | chr15    | 91073157 | 91188577 | +    | 10814    | 2273.931 | 0        | -0.21744 | 0.095902 | -2.26734 | 0.025543 | 0.086205 | 1 |
| ENSG0000 response | Inflamed | AC142528            | antisense  | chr2     | 3523046  | 3526968  | +    | 974      | 4.801909 | 0.147971 | -0.31731 | 0.139971 | -2.267   | 0.025565 | 0.086268 | 1 |
| ENSG0000 response | Inflamed | NDUFA1              | protein_cc | chrX     | 1.19E+08 | 1.19E+08 | +    | 766      | 2457.778 | 0        | 0.259443 | 0.114449 | 2.266891 | 0.025572 | 0.086279 | 1 |
| ENSG0000 response | Inflamed | C19orf45            | protein_cc | chr19    | 7557862  | 7573336  | +    | 2912     | 32.85442 | 0.002387 | 0.372489 | 0.164326 | 2.266774 | 0.025579 | 0.086293 | 1 |

|                   |          |           |                  |          |          |   |       |          |          |          |          |          |          |          |   |
|-------------------|----------|-----------|------------------|----------|----------|---|-------|----------|----------|----------|----------|----------|----------|----------|---|
| ENSG0000 response | Inflamed | PLIN4     | protein_cc chr19 | 4502204  | 4517716  | - | 6341  | 107.6611 | 0.01432  | -0.7103  | 0.313378 | -2.26658 | 0.025591 | 0.086322 | 1 |
| ENSG0000 response | Inflamed | CCDC127   | protein_cc chr5  | 196986   | 218330   | - | 9701  | 597.2148 | 0        | -0.14631 | 0.064567 | -2.26594 | 0.025632 | 0.086449 | 1 |
| ENSG0000 response | Inflamed | CCDC137   | protein_cc chr17 | 79633394 | 79640934 | + | 2762  | 857.8377 | 0        | -0.16855 | 0.074398 | -2.26557 | 0.025656 | 0.086505 | 1 |
| ENSG0000 response | Inflamed | NAALADL2  | protein_cc chr3  | 1.74E+08 | 1.76E+08 | + | 8680  | 153.8974 | 0        | 0.391096 | 0.172627 | 2.265557 | 0.025657 | 0.086505 | 1 |
| ENSG0000 response | Inflamed | HIC2      | protein_cc chr22 | 21771693 | 21805752 | + | 7219  | 641.3389 | 0        | 0.26838  | 0.118464 | 2.26551  | 0.02566  | 0.086505 | 1 |
| ENSG0000 response | Inflamed | ANKRD20A  | protein_cc chr9  | 43064966 | 43133544 | - | 5540  | 1.486874 | 0.651551 | 0.230612 | 0.101794 | 2.265473 | 0.025662 | 0.086505 | 1 |
| ENSG0000 response | Inflamed | GNG2      | protein_cc chr14 | 52292913 | 52446060 | + | 6374  | 892.222  | 0        | -0.33321 | 0.147092 | -2.26529 | 0.025673 | 0.086533 | 1 |
| ENSG0000 response | Inflamed | G6PC3     | protein_cc chr17 | 42148103 | 42153709 | + | 4548  | 1631.129 | 0        | -0.16094 | 0.071059 | -2.26492 | 0.025697 | 0.086602 | 1 |
| ENSG0000 response | Inflamed | ARL4A     | protein_cc chr7  | 12726481 | 12730559 | + | 3561  | 984.6444 | 0        | 0.272844 | 0.120472 | 2.264788 | 0.025705 | 0.086614 | 1 |
| ENSG0000 response | Inflamed | C20orf26  | protein_cc chr20 | 20033158 | 20341346 | + | 7319  | 3.081146 | 0.331742 | -0.37805 | 0.166928 | -2.26476 | 0.025707 | 0.086614 | 1 |
| ENSG0000 response | Inflamed | TTC39C    | protein_cc chr18 | 21572737 | 21715574 | + | 7188  | 332.8854 | 0        | -0.29287 | 0.129319 | -2.26468 | 0.025712 | 0.086619 | 1 |
| ENSG0000 response | Inflamed | OLFML3    | protein_cc chr1  | 1.15E+08 | 1.15E+08 | + | 2265  | 1031.241 | 0        | -0.38018 | 0.167893 | -2.26438 | 0.025731 | 0.086672 | 1 |
| ENSG0000 response | Inflamed | SPRR3     | protein_cc chr1  | 1.53E+08 | 1.53E+08 | + | 1441  | 24.27446 | 0.704057 | -0.85067 | 0.375698 | -2.26424 | 0.025741 | 0.086692 | 1 |
| ENSG0000 response | Inflamed | KB-1572G  | processed_chr22  | 23972805 | 23981128 | - | 1087  | 6.615752 | 0.221957 | 0.408748 | 0.180533 | 2.26412  | 0.025748 | 0.086696 | 1 |
| ENSG0000 response | Inflamed | ZNF311    | protein_cc chr6  | 28962562 | 28973093 | - | 3176  | 70.45823 | 0        | 0.40808  | 0.180238 | 2.264116 | 0.025748 | 0.086696 | 1 |
| ENSG0000 response | Inflamed | TRAV8-4   | TR_V_genchr14    | 22362613 | 22363210 | + | 469   | 15.20525 | 0.050119 | -0.44126 | 0.194917 | -2.26383 | 0.025767 | 0.086747 | 1 |
| ENSG0000 response | Inflamed | ATP8A1    | protein_cc chr4  | 42410390 | 42659122 | - | 11199 | 1750.499 | 0        | 0.511452 | 0.22596  | 2.263459 | 0.02579  | 0.086815 | 1 |
| ENSG0000 response | Inflamed | CD244     | protein_cc chr1  | 1.61E+08 | 1.61E+08 | - | 2904  | 102.6587 | 0        | -0.30008 | 0.132598 | -2.26309 | 0.025814 | 0.086879 | 1 |
| ENSG0000 response | Inflamed | PAQR7     | protein_cc chr1  | 26187701 | 26197744 | - | 3297  | 450.3532 | 0        | -0.30341 | 0.134069 | -2.26306 | 0.025816 | 0.086879 | 1 |
| ENSG0000 response | Inflamed | HECTD3    | protein_cc chr1  | 45468212 | 45477001 | - | 5077  | 6491.594 | 0        | 0.274979 | 0.121517 | 2.262892 | 0.025826 | 0.086904 | 1 |
| ENSG0000 response | Inflamed | KIAA1467  | protein_cc chr12 | 13197218 | 13295455 | + | 6807  | 112.4654 | 0.002387 | -0.30155 | 0.133268 | -2.26275 | 0.025835 | 0.086914 | 1 |
| ENSG0000 response | Inflamed | SP6       | protein_cc chr17 | 45922279 | 45933240 | - | 4070  | 554.0549 | 0        | -0.40822 | 0.180411 | -2.26274 | 0.025836 | 0.086914 | 1 |
| ENSG0000 response | Inflamed | RP11-545A | pseudoger chr1   | 1.8E+08  | 1.8E+08  | + | 2471  | 8.844869 | 0.116945 | 0.40425  | 0.178665 | 2.262613 | 0.025844 | 0.08693  | 1 |
| ENSG0000 response | Inflamed | TRBV5-6   | TR_V_genchr7     | 1.42E+08 | 1.42E+08 | - | 384   | 10.36277 | 0.105012 | -0.44584 | 0.197054 | -2.26253 | 0.02585  | 0.086938 | 1 |
| ENSG0000 response | Inflamed | RPL3P6    | pseudoger chr5   | 60686495 | 60687698 | - | 1204  | 1.968974 | 0.529833 | 0.27286  | 0.120609 | 2.262359 | 0.025861 | 0.086963 | 1 |
| ENSG0000 response | Inflamed | FAM92A1   | protein_cc chr8  | 94710789 | 94743755 | + | 7420  | 179.463  | 0        | -0.35869 | 0.158556 | -2.26223 | 0.025869 | 0.086979 | 1 |
| ENSG0000 response | Inflamed | POLR2J4   | pseudoger chr7   | 44053161 | 44058769 | - | 1424  | 184.9833 | 0        | 0.134205 | 0.059344 | 2.261479 | 0.025917 | 0.08713  | 1 |
| ENSG0000 response | Inflamed | GUK1      | protein_cc chr1  | 2.28E+08 | 2.28E+08 | + | 4725  | 4765.926 | 0        | -0.2227  | 0.098541 | -2.25999 | 0.026013 | 0.08744  | 1 |
| ENSG0000 response | Inflamed | TECRP1    | pseudoger chr4   | 87870818 | 87871276 | - | 459   | 13.4821  | 0.004773 | 0.214972 | 0.095141 | 2.259522 | 0.026043 | 0.08753  | 1 |
| ENSG0000 response | Inflamed | RP11-69G  | lincRNA chr15    | 63391069 | 63402602 | + | 658   | 1.706444 | 0.639618 | 0.23572  | 0.10433  | 2.259368 | 0.026053 | 0.087553 | 1 |
| ENSG0000 response | Inflamed | 04-Mar    | protein_cc chr2  | 2.17E+08 | 2.17E+08 | - | 4447  | 25.15274 | 0.038186 | 0.561094 | 0.248366 | 2.259144 | 0.026067 | 0.08759  | 1 |
| ENSG0000 response | Inflamed | TACR2     | protein_cc chr10 | 71163659 | 71176623 | - | 2871  | 52.27208 | 0        | 0.529699 | 0.234584 | 2.258032 | 0.026139 | 0.08782  | 1 |
| ENSG0000 response | Inflamed | FZD9      | protein_cc chr7  | 72848109 | 72850450 | + | 2342  | 32.7494  | 0.01432  | 0.506909 | 0.224544 | 2.257502 | 0.026173 | 0.087924 | 1 |
| ENSG0000 response | Inflamed | AC104024  | lincRNA chr17    | 16879313 | 16884667 | - | 2201  | 15.01909 | 0.069212 | -0.49607 | 0.219767 | -2.25723 | 0.026191 | 0.087972 | 1 |
| ENSG0000 response | Inflamed | RP3-508I1 | antisense chr22  | 39063590 | 39077825 | - | 3358  | 11.37232 | 0.02864  | -0.32631 | 0.144595 | -2.25668 | 0.026227 | 0.088081 | 1 |
| ENSG0000 response | Inflamed | FAM49B    | protein_cc chr8  | 1.31E+08 | 1.31E+08 | - | 9129  | 1593.666 | 0        | -0.30537 | 0.135326 | -2.25651 | 0.026237 | 0.088105 | 1 |
| ENSG0000 response | Inflamed | RP4-584D1 | antisense chr7   | 1.5E+08  | 1.5E+08  | - | 577   | 13.50119 | 0.062053 | 0.386477 | 0.171321 | 2.255864 | 0.026279 | 0.088235 | 1 |
| ENSG0000 response | Inflamed | VPS16     | protein_cc chr20 | 2821349  | 2847378  | + | 3364  | 1248.504 | 0        | -0.14917 | 0.066138 | -2.25544 | 0.026307 | 0.088317 | 1 |
| ENSG0000 response | Inflamed | FRYL      | protein_cc chr4  | 48499378 | 48782339 | - | 18170 | 3944.134 | 0        | 0.435395 | 0.193047 | 2.255384 | 0.02631  | 0.088317 | 1 |
| ENSG0000 response | Inflamed | RNPEP     | protein_cc chr1  | 2.02E+08 | 2.02E+08 | + | 3111  | 6845.742 | 0        | 0.204734 | 0.090781 | 2.255251 | 0.026319 | 0.088335 | 1 |

|                   |          |           |                  |          |          |   |       |          |          |          |          |          |          |          |   |
|-------------------|----------|-----------|------------------|----------|----------|---|-------|----------|----------|----------|----------|----------|----------|----------|---|
| ENSG0000 response | Inflamed | RP1-102E2 | pseudoger chr12  | 6586880  | 6589373  | + | 2494  | 6.813842 | 0.100239 | 0.337116 | 0.149523 | 2.254604 | 0.026361 | 0.088465 | 1 |
| ENSG0000 response | Inflamed | RP1-86C11 | lincRNA chr6     | 27090436 | 27091000 | - | 565   | 12.68258 | 0.02864  | -0.29971 | 0.132936 | -2.25451 | 0.026367 | 0.088467 | 1 |
| ENSG0000 response | Inflamed | CTD-2201l | antisense chr5   | 79348197 | 79379477 | - | 3233  | 18.99045 | 0.066826 | 0.454003 | 0.201377 | 2.254492 | 0.026368 | 0.088467 | 1 |
| ENSG0000 response | Inflamed | AXL       | protein_cc chr19 | 41725108 | 41767671 | + | 5154  | 2155.876 | 0        | -0.31965 | 0.141799 | -2.25427 | 0.026383 | 0.088505 | 1 |
| ENSG0000 response | Inflamed | MAP3K10   | protein_cc chr19 | 40697651 | 40721482 | + | 4566  | 667.3222 | 0        | -0.23852 | 0.105814 | -2.25411 | 0.026393 | 0.088528 | 1 |
| ENSG0000 response | Inflamed | PAQR4     | protein_cc chr16 | 3019246  | 3023490  | + | 2972  | 1163.893 | 0        | -0.1988  | 0.088197 | -2.25401 | 0.0264   | 0.088531 | 1 |
| ENSG0000 response | Inflamed | RP11-356l | pseudoger chr15  | 59693420 | 59694203 | - | 784   | 0.897375 | 0.782816 | -0.23624 | 0.104809 | -2.25399 | 0.026401 | 0.088531 | 1 |
| ENSG0000 response | Inflamed | HAS2      | protein_cc chr8  | 1.23E+08 | 1.23E+08 | - | 4190  | 196.4726 | 0        | -0.48157 | 0.213732 | -2.25314 | 0.026457 | 0.088706 | 1 |
| ENSG0000 response | Inflamed | ZFYVE9    | protein_cc chr1  | 52608046 | 52812358 | + | 5529  | 684.8019 | 0        | 0.395473 | 0.175594 | 2.252204 | 0.026518 | 0.0889   | 1 |
| ENSG0000 response | Inflamed | CDK5R1    | protein_cc chr17 | 30813637 | 30818274 | + | 4325  | 216.568  | 0.011933 | -0.47179 | 0.209507 | -2.25189 | 0.026538 | 0.088958 | 1 |
| ENSG0000 response | Inflamed | ADRM1     | protein_cc chr20 | 60877149 | 60883918 | + | 2142  | 3305.9   | 0        | -0.1601  | 0.071097 | -2.25184 | 0.026542 | 0.088958 | 1 |
| ENSG0000 response | Inflamed | PDK3      | protein_cc chrX  | 24483338 | 24557954 | + | 2695  | 261.494  | 0        | -0.18912 | 0.083999 | -2.2515  | 0.026564 | 0.08901  | 1 |
| ENSG0000 response | Inflamed | CTC-479C5 | protein_cc chr16 | 67963517 | 67969920 | - | 5685  | 333.8091 | 0        | -0.22505 | 0.099958 | -2.25148 | 0.026565 | 0.08901  | 1 |
| ENSG0000 response | Inflamed | PDLIM3    | protein_cc chr4  | 1.86E+08 | 1.86E+08 | - | 8080  | 747.568  | 0        | -0.44379 | 0.197114 | -2.25145 | 0.026567 | 0.08901  | 1 |
| ENSG0000 response | Inflamed | APCDD1    | protein_cc chr18 | 10454625 | 10489945 | + | 5943  | 1222.284 | 0        | -0.43371 | 0.192671 | -2.25102 | 0.026595 | 0.089092 | 1 |
| ENSG0000 response | Inflamed | AC007228  | lincRNA chr19    | 57183942 | 57185269 | - | 1328  | 44.68258 | 0.011933 | 0.225258 | 0.100086 | 2.250643 | 0.02662  | 0.089163 | 1 |
| ENSG0000 response | Inflamed | AC009951  | pseudoger chr2   | 1.45E+08 | 1.45E+08 | - | 2966  | 2.0358   | 0.548926 | -0.30872 | 0.137202 | -2.25015 | 0.026653 | 0.089261 | 1 |
| ENSG0000 response | Inflamed | FUT1      | protein_cc chr19 | 49251268 | 49258647 | - | 4343  | 62.3389  | 0.01432  | -0.43929 | 0.195247 | -2.2499  | 0.026669 | 0.089303 | 1 |
| ENSG0000 response | Inflamed | SGCB      | protein_cc chr4  | 52886872 | 52904648 | - | 4541  | 1047.088 | 0        | -0.3134  | 0.139313 | -2.24963 | 0.026687 | 0.089353 | 1 |
| ENSG0000 response | Inflamed | RP1-315G  | lincRNA chrX     | 1.23E+08 | 1.23E+08 | - | 326   | 1.902148 | 0.501193 | -0.24542 | 0.109099 | -2.24948 | 0.026696 | 0.089373 | 1 |
| ENSG0000 response | Inflamed | IMPG2     | protein_cc chr3  | 1.01E+08 | 1.01E+08 | - | 8337  | 10.98807 | 0.124105 | -0.47101 | 0.209459 | -2.24871 | 0.026747 | 0.089531 | 1 |
| ENSG0000 response | Inflamed | ELMOD1    | protein_cc chr11 | 1.07E+08 | 1.08E+08 | + | 5856  | 3.844869 | 0.350835 | -0.46972 | 0.208907 | -2.24847 | 0.026763 | 0.08957  | 1 |
| ENSG0000 response | Inflamed | FUCA2     | protein_cc chr6  | 1.44E+08 | 1.44E+08 | - | 3119  | 2846.573 | 0        | -0.13503 | 0.060053 | -2.24844 | 0.026765 | 0.08957  | 1 |
| ENSG0000 response | Inflamed | RPS6      | protein_cc chr9  | 19375713 | 19380252 | - | 2714  | 31841.35 | 0        | 0.246132 | 0.109475 | 2.248288 | 0.026775 | 0.089591 | 1 |
| ENSG0000 response | Inflamed | HSPE1     | protein_cc chr2  | 1.98E+08 | 1.98E+08 | + | 1977  | 1419.246 | 0        | 0.24795  | 0.11029  | 2.24817  | 0.026783 | 0.089606 | 1 |
| ENSG0000 response | Inflamed | CASC14    | lincRNA chr6     | 22135186 | 22147422 | - | 1940  | 3.257757 | 0.329356 | -0.33586 | 0.149475 | -2.24697 | 0.026862 | 0.089861 | 1 |
| ENSG0000 response | Inflamed | PON1      | protein_cc chr7  | 94926988 | 95025673 | - | 2988  | 3.436754 | 0.441527 | 0.386069 | 0.171842 | 2.24665  | 0.026883 | 0.089919 | 1 |
| ENSG0000 response | Inflamed | NBPF4     | protein_cc chr1  | 1.09E+08 | 1.09E+08 | - | 2485  | 14.88783 | 0.050119 | 0.492699 | 0.219353 | 2.246148 | 0.026917 | 0.090019 | 1 |
| ENSG0000 response | Inflamed | SPTBN2    | protein_cc chr11 | 66452719 | 66496697 | - | 9131  | 589.7804 | 0        | -0.43123 | 0.191997 | -2.24604 | 0.026924 | 0.090031 | 1 |
| ENSG0000 response | Inflamed | MGAT5     | protein_cc chr2  | 1.35E+08 | 1.35E+08 | + | 8578  | 5494.105 | 0        | 0.300141 | 0.133658 | 2.245596 | 0.026953 | 0.090119 | 1 |
| ENSG0000 response | Inflamed | HIST1H3F  | protein_cc chr6  | 26250370 | 26250835 | - | 466   | 2.558473 | 0.443914 | 0.328944 | 0.146494 | 2.245435 | 0.026964 | 0.09014  | 1 |
| ENSG0000 response | Inflamed | METAP1D   | protein_cc chr2  | 1.73E+08 | 1.73E+08 | + | 4850  | 244.4296 | 0        | 0.301461 | 0.134257 | 2.245397 | 0.026967 | 0.09014  | 1 |
| ENSG0000 response | Inflamed | PNMA5     | protein_cc chrX  | 1.52E+08 | 1.52E+08 | - | 3439  | 82.05489 | 0.417661 | -0.36197 | 0.161227 | -2.24507 | 0.026989 | 0.090202 | 1 |
| ENSG0000 response | Inflamed | TRIM47    | protein_cc chr17 | 73870242 | 73874656 | - | 3142  | 2213.122 | 0        | -0.20309 | 0.090463 | -2.24496 | 0.026996 | 0.090215 | 1 |
| ENSG0000 response | Inflamed | PREX2     | protein_cc chr8  | 68864353 | 69149265 | + | 12058 | 177.2005 | 0.011933 | -0.49524 | 0.220615 | -2.24482 | 0.027005 | 0.090233 | 1 |
| ENSG0000 response | Inflamed | RP11-358L | lincRNA chr15    | 79705700 | 79706228 | + | 529   | 5.319809 | 0.136038 | -0.34432 | 0.153411 | -2.24443 | 0.027031 | 0.090309 | 1 |
| ENSG0000 response | Inflamed | SEMA6C    | protein_cc chr1  | 1.51E+08 | 1.51E+08 | - | 5773  | 304.5656 | 0.004773 | -0.3448  | 0.153636 | -2.24428 | 0.027041 | 0.09033  | 1 |
| ENSG0000 response | Inflamed | MAN1C1    | protein_cc chr1  | 25943959 | 26112698 | + | 9014  | 617.7255 | 0        | -0.2937  | 0.130876 | -2.24412 | 0.027051 | 0.090349 | 1 |
| ENSG0000 response | Inflamed | ARMCX6    | protein_cc chrX  | 1.01E+08 | 1.01E+08 | - | 2487  | 253.3628 | 0        | -0.21432 | 0.095506 | -2.24409 | 0.027053 | 0.090349 | 1 |
| ENSG0000 response | Inflamed | EPHB3     | protein_cc chr3  | 1.84E+08 | 1.84E+08 | + | 4532  | 2380.348 | 0        | 0.452809 | 0.201807 | 2.243774 | 0.027075 | 0.090409 | 1 |

|                   |          |           |            |       |          |          |   |       |          |          |          |          |          |          |          |   |
|-------------------|----------|-----------|------------|-------|----------|----------|---|-------|----------|----------|----------|----------|----------|----------|----------|---|
| ENSG0000 response | Inflamed | RP4-749H1 | lincRNA    | chr1  | 20687072 | 20757727 | - | 3172  | 1.031026 | 0.739857 | -0.29134 | 0.129851 | -2.24363 | 0.027084 | 0.090413 | 1 |
| ENSG0000 response | Inflamed | EVC       | protein_cc | chr4  | 5712924  | 5830772  | + | 7923  | 810.9117 | 0        | -0.46192 | 0.205882 | -2.2436  | 0.027086 | 0.090413 | 1 |
| ENSG0000 response | Inflamed | AC006159  | lincRNA    | chr7  | 1.16E+08 | 1.16E+08 | - | 941   | 1.486874 | 0.692124 | -0.3459  | 0.154172 | -2.2436  | 0.027086 | 0.090413 | 1 |
| ENSG0000 response | Inflamed | TREML4    | protein_cc | chr6  | 41196062 | 41206620 | + | 2712  | 4.245823 | 0.73031  | -0.40265 | 0.179479 | -2.24346 | 0.027095 | 0.090432 | 1 |
| ENSG0000 response | Inflamed | AC005224  | antisense  | chr17 | 14113805 | 14121239 | + | 1537  | 22.6611  | 0.016706 | 0.437323 | 0.194945 | 2.243319 | 0.027105 | 0.090453 | 1 |
| ENSG0000 response | Inflamed | MRPS33    | protein_cc | chr7  | 1.41E+08 | 1.41E+08 | - | 1818  | 710.8258 | 0        | 0.238781 | 0.106469 | 2.242726 | 0.027144 | 0.090573 | 1 |
| ENSG0000 response | Inflamed | RP11-381k | lincRNA    | chr5  | 1.37E+08 | 1.37E+08 | - | 501   | 1.48926  | 0.613365 | 0.254186 | 0.113389 | 2.241721 | 0.027212 | 0.090786 | 1 |
| ENSG0000 response | Inflamed | RP11-109l | lincRNA    | chr9  | 72287665 | 72288629 | + | 965   | 1.513126 | 0.618138 | 0.290907 | 0.12978  | 2.241534 | 0.027224 | 0.090816 | 1 |
| ENSG0000 response | Inflamed | PDZRN4    | protein_cc | chr12 | 41582250 | 41968392 | + | 4586  | 18.47971 | 0.095465 | -0.59519 | 0.265538 | -2.24147 | 0.027229 | 0.090819 | 1 |
| ENSG0000 response | Inflamed | DRD5      | protein_cc | chr4  | 9783258  | 9785632  | + | 2375  | 46.31742 | 0.362768 | -0.62057 | 0.276882 | -2.24129 | 0.027241 | 0.090849 | 1 |
| ENSG0000 response | Inflamed | RP11-212l | lincRNA    | chr16 | 55461470 | 55496209 | - | 917   | 7.484487 | 0.288783 | -0.43543 | 0.194285 | -2.2412  | 0.027246 | 0.090856 | 1 |
| ENSG0000 response | Inflamed | RP11-21L2 | antisense  | chr11 | 76493625 | 76494106 | - | 354   | 5.861575 | 0.102625 | 0.315591 | 0.140864 | 2.240388 | 0.027301 | 0.091026 | 1 |
| ENSG0000 response | Inflamed | RP11-103f | pseudoger  | chr11 | 59054812 | 59056959 | - | 2148  | 1.045346 | 0.75179  | -0.29273 | 0.130703 | -2.23966 | 0.02735  | 0.091178 | 1 |
| ENSG0000 response | Inflamed | FNBP1     | protein_cc | chr9  | 1.33E+08 | 1.33E+08 | - | 6686  | 3403.029 | 0        | -0.2994  | 0.133692 | -2.23947 | 0.027363 | 0.091208 | 1 |
| ENSG0000 response | Inflamed | ZBED6CL   | protein_cc | chr7  | 1.5E+08  | 1.5E+08  | + | 2871  | 480.5752 | 0        | -0.25739 | 0.114938 | -2.23939 | 0.027368 | 0.091215 | 1 |
| ENSG0000 response | Inflamed | DLST      | protein_cc | chr14 | 75348594 | 75370448 | + | 4550  | 4955.785 | 0        | 0.17947  | 0.080154 | 2.239051 | 0.027391 | 0.09128  | 1 |
| ENSG0000 response | Inflamed | CAPN14    | protein_cc | chr2  | 31395924 | 31456724 | - | 4021  | 19.59666 | 0.102625 | -0.54968 | 0.24553  | -2.23876 | 0.02741  | 0.091333 | 1 |
| ENSG0000 response | Inflamed | GLRX5     | protein_cc | chr14 | 95999840 | 96011061 | + | 2845  | 1426.217 | 0        | 0.159625 | 0.071304 | 2.238656 | 0.027417 | 0.091345 | 1 |
| ENSG0000 response | Inflamed | MAB21L2   | protein_cc | chr4  | 1.52E+08 | 1.52E+08 | + | 2767  | 407.0644 | 0        | -0.48847 | 0.218205 | -2.23857 | 0.027423 | 0.091353 | 1 |
| ENSG0000 response | Inflamed | HIST2H2A  | protein_cc | chr1  | 1.5E+08  | 1.5E+08  | + | 549   | 1.02864  | 0.749403 | -0.24764 | 0.110639 | -2.23827 | 0.027443 | 0.091409 | 1 |
| ENSG0000 response | Inflamed | AGBL5     | protein_cc | chr2  | 27265232 | 27293490 | + | 5283  | 793.1838 | 0        | 0.160972 | 0.071924 | 2.238088 | 0.027456 | 0.091438 | 1 |
| ENSG0000 response | Inflamed | NOS1      | protein_cc | chr12 | 1.18E+08 | 1.18E+08 | - | 13144 | 16.52267 | 0.372315 | -0.7786  | 0.347921 | -2.23785 | 0.027472 | 0.09148  | 1 |
| ENSG0000 response | Inflamed | DSG3      | protein_cc | chr18 | 29027758 | 29058665 | + | 5525  | 334.5537 | 0.064439 | -1.05046 | 0.469635 | -2.23677 | 0.027545 | 0.091712 | 1 |
| ENSG0000 response | Inflamed | LPHN1     | protein_cc | chr19 | 14260750 | 14316999 | - | 6292  | 1208.733 | 0        | 0.294471 | 0.1317   | 2.235929 | 0.027602 | 0.091889 | 1 |
| ENSG0000 response | Inflamed | HIST2H2Bf | pseudoger  | chr1  | 1.49E+08 | 1.49E+08 | - | 567   | 2.336516 | 0.4821   | -0.29005 | 0.129726 | -2.23584 | 0.027607 | 0.091897 | 1 |
| ENSG0000 response | Inflamed | PMAIP1    | protein_cc | chr18 | 57567180 | 57571538 | + | 2235  | 132.1265 | 0        | -0.43147 | 0.193011 | -2.2355  | 0.027631 | 0.091963 | 1 |
| ENSG0000 response | Inflamed | RP11-95P2 | lincRNA    | chr16 | 4295826  | 4303790  | - | 2270  | 80.83055 | 0        | -0.24129 | 0.107942 | -2.2354  | 0.027637 | 0.091973 | 1 |
| ENSG0000 response | Inflamed | TAF1B     | protein_cc | chr2  | 9983483  | 10074545 | + | 4064  | 204.5561 | 0        | -0.35426 | 0.15849  | -2.2352  | 0.027651 | 0.092007 | 1 |
| ENSG0000 response | Inflamed | IER5      | protein_cc | chr1  | 1.81E+08 | 1.81E+08 | + | 2340  | 1853.788 | 0        | -0.23646 | 0.105791 | -2.23511 | 0.027657 | 0.092015 | 1 |
| ENSG0000 response | Inflamed | RN7SL619l | misc_RNA   | chr19 | 13925880 | 13926133 | - | 254   | 3.47494  | 0.365155 | 0.298275 | 0.133458 | 2.234972 | 0.027667 | 0.092035 | 1 |
| ENSG0000 response | Inflamed | TMSB10    | protein_cc | chr2  | 85132749 | 85133795 | + | 492   | 29389.26 | 0        | -0.19814 | 0.088665 | -2.23473 | 0.027683 | 0.092078 | 1 |
| ENSG0000 response | Inflamed | NTSR1     | protein_cc | chr20 | 61340189 | 61394123 | + | 4237  | 7.193317 | 0.367542 | -0.59779 | 0.267545 | -2.23435 | 0.027709 | 0.092147 | 1 |
| ENSG0000 response | Inflamed | TATDN1    | protein_cc | chr8  | 1.26E+08 | 1.26E+08 | - | 4778  | 285.0358 | 0        | 0.233431 | 0.104475 | 2.234322 | 0.027711 | 0.092147 | 1 |
| ENSG0000 response | Inflamed | PROSC     | protein_cc | chr8  | 37620111 | 37637283 | + | 3426  | 1898.532 | 0        | 0.213581 | 0.095595 | 2.234232 | 0.027717 | 0.092156 | 1 |
| ENSG0000 response | Inflamed | KCNH1     | protein_cc | chr1  | 2.11E+08 | 2.11E+08 | - | 3208  | 18.17184 | 0.047733 | -0.40687 | 0.182145 | -2.23379 | 0.027747 | 0.092245 | 1 |
| ENSG0000 response | Inflamed | SALL2     | protein_cc | chr14 | 21989232 | 22005350 | - | 5365  | 261.5895 | 0.009547 | -0.418   | 0.187166 | -2.23332 | 0.027779 | 0.09234  | 1 |
| ENSG0000 response | Inflamed | RPL23AP7l | pseudoger  | chr19 | 59084870 | 59111168 | + | 4969  | 943.358  | 0        | -0.15214 | 0.068124 | -2.2332  | 0.027787 | 0.092355 | 1 |
| ENSG0000 response | Inflamed | TMEM144   | protein_cc | chr4  | 1.59E+08 | 1.59E+08 | + | 9243  | 583.3222 | 0        | 0.422759 | 0.189332 | 2.232895 | 0.027808 | 0.092412 | 1 |
| ENSG0000 response | Inflamed | TEK       | protein_cc | chr9  | 27109139 | 27230173 | + | 4768  | 580.6253 | 0.004773 | -0.48495 | 0.217201 | -2.2327  | 0.027821 | 0.092444 | 1 |
| ENSG0000 response | Inflamed | ANKRD33E  | protein_cc | chr5  | 10564442 | 10650308 | + | 2163  | 26.86158 | 0.040573 | -0.50069 | 0.224265 | -2.23256 | 0.027831 | 0.092464 | 1 |

|                   |          |           |                  |          |          |   |       |          |          |          |          |          |          |          |   |
|-------------------|----------|-----------|------------------|----------|----------|---|-------|----------|----------|----------|----------|----------|----------|----------|---|
| ENSG0000 response | Inflamed | MAPK9     | protein_cc chr5  | 1.8E+08  | 1.8E+08  | - | 8955  | 1575.678 | 0        | 0.251228 | 0.112539 | 2.232362 | 0.027844 | 0.09249  | 1 |
| ENSG0000 response | Inflamed | S100A2    | protein_cc chr1  | 1.54E+08 | 1.54E+08 | - | 1567  | 56.90453 | 0        | -0.57232 | 0.256374 | -2.23235 | 0.027846 | 0.09249  | 1 |
| ENSG0000 response | Inflamed | PSME1     | protein_cc chr14 | 24605367 | 24608176 | + | 1781  | 7026.921 | 0        | -0.15611 | 0.069935 | -2.23224 | 0.027853 | 0.092501 | 1 |
| ENSG0000 response | Inflamed | VTI1B     | protein_cc chr14 | 68113792 | 68141548 | - | 5789  | 2537.508 | 0        | 0.207895 | 0.093135 | 2.232196 | 0.027856 | 0.092501 | 1 |
| ENSG0000 response | Inflamed | PKD2      | protein_cc chr4  | 88928820 | 88998929 | + | 5498  | 739.2936 | 0        | -0.42261 | 0.189345 | -2.23193 | 0.027874 | 0.092539 | 1 |
| ENSG0000 response | Inflamed | AP001619  | sense_intr chr21 | 43294865 | 43297722 | - | 447   | 3.816229 | 0.295943 | -0.31159 | 0.139607 | -2.23192 | 0.027874 | 0.092539 | 1 |
| ENSG0000 response | Inflamed | DMBT1     | protein_cc chr10 | 1.24E+08 | 1.24E+08 | + | 8073  | 46831.9  | 0        | -1.03517 | 0.463857 | -2.23166 | 0.027892 | 0.092587 | 1 |
| ENSG0000 response | Inflamed | PCDHB7    | protein_cc chr5  | 1.41E+08 | 1.41E+08 | + | 3715  | 52.83771 | 0.016706 | -0.39179 | 0.175585 | -2.23135 | 0.027914 | 0.092646 | 1 |
| ENSG0000 response | Inflamed | TAF12     | protein_cc chr1  | 28915835 | 28969597 | - | 2337  | 432.3198 | 0        | -0.19907 | 0.089252 | -2.23044 | 0.027976 | 0.09284  | 1 |
| ENSG0000 response | Inflamed | AC124789  | processed_chr17  | 36606638 | 36608688 | - | 1248  | 12.51074 | 0.0358   | -0.39136 | 0.17548  | -2.23021 | 0.027991 | 0.092878 | 1 |
| ENSG0000 response | Inflamed | RP11-379E | lincRNA chr3     | 1.26E+08 | 1.26E+08 | - | 4198  | 109.2387 | 0.002387 | 0.45387  | 0.203513 | 2.230176 | 0.027994 | 0.092878 | 1 |
| ENSG0000 response | Inflamed | SUN1      | protein_cc chr7  | 855528   | 936072   | + | 11908 | 5018.215 | 0        | 0.29978  | 0.134457 | 2.229569 | 0.028036 | 0.093004 | 1 |
| ENSG0000 response | Inflamed | PPFIA2    | protein_cc chr12 | 81652045 | 82153332 | - | 8300  | 27.78282 | 0.033413 | -0.49575 | 0.222377 | -2.22931 | 0.028053 | 0.093051 | 1 |
| ENSG0000 response | Inflamed | POF1B     | protein_cc chrX  | 84532402 | 84634748 | - | 4029  | 2845.368 | 0.002387 | 0.610674 | 0.27396  | 2.229059 | 0.028071 | 0.093091 | 1 |
| ENSG0000 response | Inflamed | RP11-27M  | lincRNA chr16    | 10608699 | 10622059 | - | 502   | 2.198091 | 0.439141 | 0.295438 | 0.132541 | 2.229035 | 0.028072 | 0.093091 | 1 |
| ENSG0000 response | Inflamed | CTD-3162l | lincRNA chr19    | 36795482 | 36803570 | + | 2674  | 5.620525 | 0.26969  | -0.41615 | 0.186719 | -2.22874 | 0.028093 | 0.093147 | 1 |
| ENSG0000 response | Inflamed | GOLM1     | protein_cc chr9  | 88641061 | 88715088 | - | 4233  | 15952.73 | 0        | 0.344469 | 0.154567 | 2.22861  | 0.028102 | 0.093164 | 1 |
| ENSG0000 response | Inflamed | DTHD1     | protein_cc chr4  | 36283244 | 36347378 | + | 5618  | 32.30788 | 0.045346 | -0.59862 | 0.268661 | -2.22817 | 0.028132 | 0.093253 | 1 |
| ENSG0000 response | Inflamed | RP11-17A' | pseudoger chr8   | 57500944 | 57501346 | + | 403   | 7.897375 | 0.081146 | 0.352705 | 0.158313 | 2.227891 | 0.028151 | 0.093305 | 1 |
| ENSG0000 response | Inflamed | MXRA5P1   | pseudoger chrY   | 14077914 | 14108092 | + | 8000  | 92.08831 | 0.071599 | -0.56436 | 0.253326 | -2.22781 | 0.028157 | 0.093313 | 1 |
| ENSG0000 response | Inflamed | KRT19     | protein_cc chr17 | 39679869 | 39684560 | - | 2336  | 57362.25 | 0        | 0.429594 | 0.19287  | 2.227371 | 0.028187 | 0.093393 | 1 |
| ENSG0000 response | Inflamed | OPHN1     | protein_cc chrX  | 67262186 | 67653755 | - | 8224  | 366.5012 | 0        | 0.370699 | 0.16643  | 2.227351 | 0.028188 | 0.093393 | 1 |
| ENSG0000 response | Inflamed | TAF7L     | protein_cc chrX  | 1.01E+08 | 1.01E+08 | - | 2728  | 3.195704 | 0.336516 | -0.34074 | 0.15299  | -2.22723 | 0.028197 | 0.093401 | 1 |
| ENSG0000 response | Inflamed | DGKZP1    | pseudoger chr13  | 44542560 | 44545335 | + | 2776  | 18.70167 | 0.019093 | -0.2692  | 0.120868 | -2.22722 | 0.028198 | 0.093401 | 1 |
| ENSG0000 response | Inflamed | SLC25A37  | protein_cc chr8  | 23386318 | 23432976 | + | 8147  | 2532.492 | 0        | -0.43679 | 0.196154 | -2.22677 | 0.028229 | 0.093486 | 1 |
| ENSG0000 response | Inflamed | DEFA6     | protein_cc chr8  | 6782215  | 6783598  | - | 469   | 2654.346 | 0.040573 | 1.286201 | 0.577619 | 2.226731 | 0.028231 | 0.093486 | 1 |
| ENSG0000 response | Inflamed | TRBV6-5   | TR_V_gen chr7    | 1.42E+08 | 1.42E+08 | - | 410   | 24.63484 | 0.02864  | -0.44292 | 0.198912 | -2.22669 | 0.028234 | 0.093486 | 1 |
| ENSG0000 response | Inflamed | ARL2BP    | protein_cc chr16 | 57279010 | 57287516 | + | 2124  | 1537.234 | 0        | -0.18193 | 0.08172  | -2.22625 | 0.028265 | 0.093564 | 1 |
| ENSG0000 response | Inflamed | RP11-802C | antisense chr3   | 58413982 | 58414542 | + | 561   | 12.82578 | 0.042959 | -0.35857 | 0.161063 | -2.22625 | 0.028265 | 0.093564 | 1 |
| ENSG0000 response | Inflamed | UST       | protein_cc chr6  | 1.49E+08 | 1.49E+08 | + | 4563  | 203.8592 | 0        | -0.36633 | 0.164558 | -2.22614 | 0.028272 | 0.093577 | 1 |
| ENSG0000 response | Inflamed | PYY2      | pseudoger chr17  | 26553589 | 26555091 | + | 1076  | 7.465394 | 0.121718 | -0.35923 | 0.161403 | -2.22565 | 0.028306 | 0.09367  | 1 |
| ENSG0000 response | Inflamed | PEX19     | protein_cc chr1  | 1.6E+08  | 1.6E+08  | - | 4461  | 1551.981 | 0        | 0.190446 | 0.085571 | 2.225587 | 0.02831  | 0.09367  | 1 |
| ENSG0000 response | Inflamed | ATP10B    | protein_cc chr5  | 1.6E+08  | 1.6E+08  | - | 11310 | 12959.94 | 0        | 0.574123 | 0.257966 | 2.225578 | 0.028311 | 0.09367  | 1 |
| ENSG0000 response | Inflamed | LGR4      | protein_cc chr11 | 27387508 | 27494322 | - | 6340  | 4054.826 | 0        | 0.491759 | 0.220986 | 2.225295 | 0.028331 | 0.093723 | 1 |
| ENSG0000 response | Inflamed | FAM183B   | protein_cc chr7  | 38724946 | 38726637 | - | 1595  | 2.73747  | 0.431981 | -0.32552 | 0.14629  | -2.22514 | 0.028341 | 0.093746 | 1 |
| ENSG0000 response | Inflamed | RPL5P29   | pseudoger chr11  | 56124804 | 56125697 | + | 894   | 6.942721 | 0.095465 | 0.302509 | 0.135955 | 2.225067 | 0.028347 | 0.093752 | 1 |
| ENSG0000 response | Inflamed | RP11-326l | lincRNA chr4     | 1.85E+08 | 1.85E+08 | + | 2503  | 115.0143 | 0        | -0.22189 | 0.099723 | -2.22501 | 0.028351 | 0.093754 | 1 |
| ENSG0000 response | Inflamed | GPX4      | protein_cc chr19 | 1103936  | 1106787  | + | 2033  | 3208.549 | 0        | -0.22356 | 0.100516 | -2.22412 | 0.028412 | 0.093933 | 1 |
| ENSG0000 response | Inflamed | CCL4L2    | protein_cc chr17 | 34639793 | 34641846 | + | 2054  | 10.08831 | 0.274463 | -0.56399 | 0.253579 | -2.22412 | 0.028412 | 0.093933 | 1 |
| ENSG0000 response | Inflamed | RP11-428C | lincRNA chr11    | 19321430 | 19329905 | + | 648   | 0.988067 | 0.74463  | 0.2572   | 0.115666 | 2.223648 | 0.028445 | 0.09403  | 1 |



|                   |          |           |            |       |          |          |   |      |          |          |          |          |          |          |          |   |
|-------------------|----------|-----------|------------|-------|----------|----------|---|------|----------|----------|----------|----------|----------|----------|----------|---|
| ENSG0000 response | Inflamed | LINC00578 | lincRNA    | chr3  | 1.77E+08 | 1.77E+08 | + | 1234 | 13.19332 | 0.040573 | -0.43726 | 0.196666 | -2.22337 | 0.028464 | 0.094082 | 1 |
| ENSG0000 response | Inflamed | CPNE4     | protein_cc | chr3  | 1.31E+08 | 1.32E+08 | - | 6342 | 15.73031 | 0.252983 | -0.67023 | 0.301462 | -2.22326 | 0.028472 | 0.094097 | 1 |
| ENSG0000 response | Inflamed | WDR62     | protein_cc | chr19 | 36545783 | 36596008 | + | 9775 | 350.8138 | 0        | -0.29978 | 0.134849 | -2.22309 | 0.028484 | 0.094123 | 1 |
| ENSG0000 response | Inflamed | ZNF844    | protein_cc | chr19 | 12175514 | 12192380 | + | 6620 | 451.611  | 0        | 0.341002 | 0.153407 | 2.222855 | 0.0285   | 0.094165 | 1 |
| ENSG0000 response | Inflamed | CNTRL     | protein_cc | chr9  | 1.24E+08 | 1.24E+08 | + | 9417 | 452.4463 | 0        | -0.4682  | 0.210635 | -2.22278 | 0.028505 | 0.09417  | 1 |
| ENSG0000 response | Inflamed | DLAT      | protein_cc | chr11 | 1.12E+08 | 1.12E+08 | + | 4831 | 1824.931 | 0        | 0.265075 | 0.119261 | 2.222636 | 0.028516 | 0.094192 | 1 |
| ENSG0000 response | Inflamed | ETS1      | protein_cc | chr11 | 1.28E+08 | 1.28E+08 | - | 7153 | 4849.055 | 0        | -0.40178 | 0.180798 | -2.22228 | 0.02854  | 0.094262 | 1 |
| ENSG0000 response | Inflamed | PLEK2     | protein_cc | chr14 | 67853700 | 67878917 | - | 1603 | 1538.174 | 0        | 0.328693 | 0.14793  | 2.221944 | 0.028564 | 0.094328 | 1 |
| ENSG0000 response | Inflamed | RN7SK     | misc_RNA   | chr6  | 52860418 | 52860748 | + | 331  | 72.59189 | 0        | 0.503854 | 0.226801 | 2.22157  | 0.02859  | 0.094403 | 1 |
| ENSG0000 response | Inflamed | ACAA2     | protein_cc | chr18 | 47309869 | 47340330 | - | 3740 | 5408.499 | 0        | 0.33151  | 0.149269 | 2.220897 | 0.028637 | 0.094536 | 1 |
| ENSG0000 response | Inflamed | EMD       | protein_cc | chrX  | 1.54E+08 | 1.54E+08 | + | 2020 | 1565.554 | 0        | -0.15403 | 0.069357 | -2.22089 | 0.028638 | 0.094536 | 1 |
| ENSG0000 response | Inflamed | EGF       | protein_cc | chr4  | 1.11E+08 | 1.11E+08 | + | 6127 | 107.611  | 0.026253 | 0.691118 | 0.31125  | 2.220456 | 0.028668 | 0.094624 | 1 |
| ENSG0000 response | Inflamed | ZFP57     | protein_cc | chr6  | 29640169 | 29648887 | - | 2131 | 17.74224 | 0.568019 | -0.26927 | 0.121281 | -2.22019 | 0.028686 | 0.094673 | 1 |
| ENSG0000 response | Inflamed | RAD51D    | protein_cc | chr17 | 33426811 | 33448541 | - | 3720 | 240.2649 | 0        | -0.17073 | 0.076905 | -2.21998 | 0.028701 | 0.09471  | 1 |
| ENSG0000 response | Inflamed | TMEM136   | protein_cc | chr11 | 1.2E+08  | 1.2E+08  | + | 4468 | 87.27924 | 0        | -0.34926 | 0.157332 | -2.21991 | 0.028706 | 0.094715 | 1 |
| ENSG0000 response | Inflamed | KIAA0754  | protein_cc | chr1  | 39876151 | 39882154 | + | 6004 | 256.3055 | 0.033413 | -0.55613 | 0.250559 | -2.21957 | 0.02873  | 0.094782 | 1 |
| ENSG0000 response | Inflamed | ZSCAN31   | protein_cc | chr6  | 28292470 | 28324048 | - | 4957 | 163.2005 | 0        | 0.3548   | 0.159877 | 2.219207 | 0.028756 | 0.094854 | 1 |
| ENSG0000 response | Inflamed | FCRL3     | protein_cc | chr1  | 1.58E+08 | 1.58E+08 | - | 6538 | 441.5131 | 0.002387 | -0.73481 | 0.331155 | -2.21893 | 0.028775 | 0.094906 | 1 |
| ENSG0000 response | Inflamed | C20orf194 | protein_cc | chr20 | 3229951  | 3388272  | - | 8864 | 549.9236 | 0        | -0.3902  | 0.175893 | -2.21839 | 0.028813 | 0.09502  | 1 |
| ENSG0000 response | Inflamed | PLEKHB1   | protein_cc | chr11 | 73357223 | 73373864 | + | 4933 | 680.2816 | 0        | 0.337776 | 0.152268 | 2.218297 | 0.02882  | 0.095029 | 1 |
| ENSG0000 response | Inflamed | RP11-378J | antisense  | chr1  | 2.23E+08 | 2.23E+08 | + | 1450 | 16.20525 | 0.00716  | 0.325881 | 0.14691  | 2.218241 | 0.028824 | 0.09503  | 1 |
| ENSG0000 response | Inflamed | AC095067  | lincRNA    | chr7  | 47661537 | 47669491 | + | 2761 | 2.095465 | 0.491647 | -0.30701 | 0.138415 | -2.21804 | 0.028838 | 0.09505  | 1 |
| ENSG0000 response | Inflamed | TMEM192   | protein_cc | chr4  | 1.66E+08 | 1.66E+08 | - | 6427 | 622.2888 | 0        | 0.289755 | 0.130637 | 2.218013 | 0.02884  | 0.09505  | 1 |
| ENSG0000 response | Inflamed | EHF       | protein_cc | chr11 | 34642640 | 34682604 | + | 4386 | 5780.957 | 0        | 0.584698 | 0.263618 | 2.217978 | 0.028842 | 0.09505  | 1 |
| ENSG0000 response | Inflamed | GS1-124K5 | lincRNA    | chr7  | 65958693 | 65960461 | + | 540  | 19.00716 | 0.002387 | -0.33214 | 0.149755 | -2.21791 | 0.028847 | 0.09505  | 1 |
| ENSG0000 response | Inflamed | CTD-3138E | antisense  | chr19 | 58768639 | 58790174 | - | 2705 | 96.2864  | 0        | -0.2317  | 0.10447  | -2.2179  | 0.028848 | 0.09505  | 1 |
| ENSG0000 response | Inflamed | JAZF1-AS1 | antisense  | chr7  | 28219941 | 28283536 | + | 4092 | 2.587112 | 0.424821 | -0.29371 | 0.132435 | -2.2178  | 0.028855 | 0.095062 | 1 |
| ENSG0000 response | Inflamed | MPP7      | protein_cc | chr10 | 28339922 | 28623415 | - | 6577 | 605.5346 | 0        | 0.444924 | 0.200622 | 2.217724 | 0.02886  | 0.095067 | 1 |
| ENSG0000 response | Inflamed | AC011484  | protein_cc | chr19 | 46997765 | 46999755 | + | 1991 | 28.46301 | 0.009547 | -0.38946 | 0.175627 | -2.21757 | 0.028871 | 0.095091 | 1 |
| ENSG0000 response | Inflamed | MIRLET7I  | miRNA      | chr12 | 62997466 | 62997550 | + | 85   | 1.591885 | 0.632458 | -0.30123 | 0.135859 | -2.21724 | 0.028894 | 0.095156 | 1 |
| ENSG0000 response | Inflamed | REC8      | protein_cc | chr14 | 24641062 | 24649463 | + | 3841 | 502.3461 | 0        | -0.32446 | 0.146342 | -2.21712 | 0.028903 | 0.095171 | 1 |
| ENSG0000 response | Inflamed | CTB-191K2 | antisense  | chr19 | 50813279 | 50813796 | - | 457  | 1.75179  | 0.665871 | 0.312693 | 0.141044 | 2.216983 | 0.028912 | 0.095191 | 1 |
| ENSG0000 response | Inflamed | SYDE2     | protein_cc | chr1  | 85622556 | 85666729 | - | 6451 | 118.9427 | 0.004773 | 0.487498 | 0.219991 | 2.21599  | 0.028982 | 0.09541  | 1 |
| ENSG0000 response | Inflamed | FNDC8     | protein_cc | chr17 | 33448598 | 33457751 | + | 1388 | 0.811456 | 0.799523 | -0.24241 | 0.109402 | -2.21583 | 0.028994 | 0.095437 | 1 |
| ENSG0000 response | Inflamed | KRT18P33  | pseudoger  | chr2  | 65893829 | 65894871 | + | 1043 | 3.267303 | 0.312649 | 0.325918 | 0.147092 | 2.21575  | 0.028999 | 0.095442 | 1 |
| ENSG0000 response | Inflamed | GGA2      | protein_cc | chr16 | 23474863 | 23533316 | - | 8231 | 3596.699 | 0        | -0.259   | 0.116895 | -2.21566 | 0.029006 | 0.095452 | 1 |
| ENSG0000 response | Inflamed | CDIP1     | protein_cc | chr16 | 4560676  | 4588829  | - | 4268 | 960.0692 | 0        | -0.23003 | 0.103826 | -2.2155  | 0.029017 | 0.095476 | 1 |
| ENSG0000 response | Inflamed | GS1-279B7 | lincRNA    | chr1  | 1.85E+08 | 1.85E+08 | + | 752  | 9.198091 | 0.040573 | -0.28271 | 0.127608 | -2.21542 | 0.029023 | 0.09548  | 1 |
| ENSG0000 response | Inflamed | FAM198A   | protein_cc | chr3  | 43020759 | 43101703 | + | 4411 | 48.77566 | 0        | -0.36817 | 0.16619  | -2.21538 | 0.029025 | 0.09548  | 1 |
| ENSG0000 response | Inflamed | RP11-120C | lincRNA    | chrX  | 10865996 | 11129261 | - | 3080 | 4.689737 | 0.157518 | 0.316742 | 0.143054 | 2.21414  | 0.029113 | 0.095758 | 1 |

|                   |          |           |                  |          |          |   |       |          |          |          |          |          |          |          |   |
|-------------------|----------|-----------|------------------|----------|----------|---|-------|----------|----------|----------|----------|----------|----------|----------|---|
| ENSG0000 response | Inflamed | KDM2B     | protein_cc chr12 | 1.22E+08 | 1.22E+08 | - | 13623 | 1440.9   | 0        | -0.27566 | 0.124512 | -2.21393 | 0.029128 | 0.095795 | 1 |
| ENSG0000 response | Inflamed | CHMP1B    | protein_cc chr18 | 11851395 | 11854448 | + | 3054  | 2877.444 | 0        | 0.200689 | 0.090651 | 2.213879 | 0.029132 | 0.095795 | 1 |
| ENSG0000 response | Inflamed | RAB5B     | protein_cc chr12 | 56367697 | 56388490 | + | 4611  | 2335.857 | 0        | 0.221969 | 0.100265 | 2.213819 | 0.029136 | 0.095797 | 1 |
| ENSG0000 response | Inflamed | RNF115    | protein_cc chr1  | 1.46E+08 | 1.46E+08 | + | 9360  | 1157.067 | 0        | -0.21331 | 0.096377 | -2.21327 | 0.029175 | 0.095898 | 1 |
| ENSG0000 response | Inflamed | AC104534  | antisense chr19  | 39310806 | 39313863 | + | 566   | 24.26492 | 0.054893 | 0.605587 | 0.273618 | 2.213259 | 0.029176 | 0.095898 | 1 |
| ENSG0000 response | Inflamed | TPBG      | protein_cc chr6  | 83072923 | 83080545 | + | 6904  | 1100.048 | 0        | -0.26669 | 0.120496 | -2.21323 | 0.029178 | 0.095898 | 1 |
| ENSG0000 response | Inflamed | TMX4      | protein_cc chr20 | 7957995  | 8000476  | - | 6579  | 1198.988 | 0        | -0.30809 | 0.13923  | -2.21284 | 0.029206 | 0.095976 | 1 |
| ENSG0000 response | Inflamed | CTSW      | protein_cc chr11 | 65647280 | 65651212 | + | 1719  | 231.2578 | 0        | -0.32996 | 0.149113 | -2.2128  | 0.029209 | 0.095976 | 1 |
| ENSG0000 response | Inflamed | TMPRSS6   | protein_cc chr22 | 37461476 | 37505603 | - | 4082  | 53.00955 | 0        | 0.597872 | 0.270234 | 2.212424 | 0.029236 | 0.096042 | 1 |
| ENSG0000 response | Inflamed | TMBIM6    | protein_cc chr12 | 50101508 | 50158717 | + | 6187  | 33755.89 | 0        | 0.236801 | 0.107033 | 2.212415 | 0.029236 | 0.096042 | 1 |
| ENSG0000 response | Inflamed | SCARNA7   | snoRNA chr3      | 1.6E+08  | 1.6E+08  | - | 330   | 0.976134 | 0.768496 | 0.245287 | 0.110883 | 2.212134 | 0.029256 | 0.096095 | 1 |
| ENSG0000 response | Inflamed | AC006042  | antisense chr7   | 8153655  | 8156191  | + | 524   | 0.954654 | 0.75179  | -0.24318 | 0.109969 | -2.21133 | 0.029314 | 0.096272 | 1 |
| ENSG0000 response | Inflamed | ARMCX1    | protein_cc chrX  | 1.01E+08 | 1.01E+08 | + | 2141  | 207.7232 | 0.002387 | -0.33936 | 0.153469 | -2.21124 | 0.02932  | 0.09628  | 1 |
| ENSG0000 response | Inflamed | RP1-68D1  | sense_intr chr11 | 35234097 | 35235554 | + | 704   | 18.28162 | 0.095465 | -0.51342 | 0.232211 | -2.21102 | 0.029336 | 0.096321 | 1 |
| ENSG0000 response | Inflamed | TXK       | protein_cc chr4  | 48068410 | 48136273 | - | 3472  | 77.38425 | 0.009547 | -0.52583 | 0.237835 | -2.21092 | 0.029343 | 0.096333 | 1 |
| ENSG0000 response | Inflamed | ATP5D     | protein_cc chr19 | 1241749  | 1244824  | + | 2245  | 4732.081 | 0        | 0.215291 | 0.097382 | 2.210798 | 0.029352 | 0.096349 | 1 |
| ENSG0000 response | Inflamed | CYSLTR2   | protein_cc chr13 | 49280951 | 49283498 | + | 2548  | 61.47494 | 0.00716  | -0.50822 | 0.229902 | -2.21057 | 0.029368 | 0.096387 | 1 |
| ENSG0000 response | Inflamed | KB-208E9  | lincRNA chr22    | 23923067 | 23926046 | - | 1081  | 7.854415 | 0.202864 | 0.427675 | 0.193476 | 2.210483 | 0.029374 | 0.096387 | 1 |
| ENSG0000 response | Inflamed | SHC2      | protein_cc chr19 | 416583   | 460996   | - | 4796  | 435.5012 | 0        | -0.35107 | 0.158821 | -2.21048 | 0.029374 | 0.096387 | 1 |
| ENSG0000 response | Inflamed | TP73-AS1  | antisense chr1   | 3652548  | 3663900  | - | 6597  | 685.1002 | 0        | -0.34779 | 0.157361 | -2.21013 | 0.0294   | 0.096458 | 1 |
| ENSG0000 response | Inflamed | PSEN1     | protein_cc chr14 | 73603126 | 73690399 | + | 9947  | 4470.47  | 0        | 0.2842   | 0.128602 | 2.209921 | 0.029414 | 0.096494 | 1 |
| ENSG0000 response | Inflamed | STK10     | protein_cc chr5  | 1.71E+08 | 1.72E+08 | - | 9083  | 3193.697 | 0        | -0.26404 | 0.119487 | -2.2098  | 0.029423 | 0.096511 | 1 |
| ENSG0000 response | Inflamed | LINC00278 | lincRNA chrY     | 2870953  | 2970313  | + | 775   | 12.15752 | 0.410501 | 0.227655 | 0.103057 | 2.209021 | 0.029479 | 0.096682 | 1 |
| ENSG0000 response | Inflamed | NME4      | protein_cc chr16 | 446725   | 460367   | + | 3663  | 1193.778 | 0        | -0.23898 | 0.108192 | -2.2089  | 0.029488 | 0.096699 | 1 |
| ENSG0000 response | Inflamed | ZNF438    | protein_cc chr10 | 31109136 | 31320866 | - | 4294  | 268.0811 | 0        | -0.29473 | 0.133446 | -2.20857 | 0.029511 | 0.096763 | 1 |
| ENSG0000 response | Inflamed | RNF32     | protein_cc chr7  | 1.56E+08 | 1.56E+08 | + | 4371  | 40.65871 | 0        | 0.284663 | 0.128916 | 2.208138 | 0.029542 | 0.096854 | 1 |
| ENSG0000 response | Inflamed | TDRP      | protein_cc chr8  | 439803   | 495781   | - | 3602  | 157.5322 | 0.002387 | -0.54193 | 0.245476 | -2.20765 | 0.029577 | 0.096949 | 1 |
| ENSG0000 response | Inflamed | NT5DC3    | protein_cc chr12 | 1.04E+08 | 1.04E+08 | - | 8722  | 575.5274 | 0        | 0.396921 | 0.179795 | 2.207633 | 0.029579 | 0.096949 | 1 |
| ENSG0000 response | Inflamed | PTGES3L   | protein_cc chr17 | 41120105 | 41132545 | - | 2951  | 37.05489 | 0        | 0.224379 | 0.101647 | 2.207434 | 0.029593 | 0.096981 | 1 |
| ENSG0000 response | Inflamed | PGK1P2    | pseudoger chr19  | 12670385 | 12671919 | + | 1214  | 5.26969  | 0.112172 | 0.308293 | 0.139664 | 2.207392 | 0.029596 | 0.096981 | 1 |
| ENSG0000 response | Inflamed | HNRNPA1f  | pseudoger chr12  | 68429547 | 68430633 | + | 1087  | 8.520286 | 0.207637 | -0.51512 | 0.233368 | -2.20731 | 0.029602 | 0.096989 | 1 |
| ENSG0000 response | Inflamed | AC016700  | lincRNA chr2     | 70351168 | 70352449 | - | 662   | 8.081146 | 0.023866 | -0.26518 | 0.120182 | -2.20644 | 0.029664 | 0.097181 | 1 |
| ENSG0000 response | Inflamed | NUDT19    | protein_cc chr19 | 33182867 | 33204702 | + | 2967  | 764.6444 | 0        | 0.215758 | 0.09779  | 2.206351 | 0.029671 | 0.097191 | 1 |
| ENSG0000 response | Inflamed | RP11-158f | antisense chr15  | 86287340 | 86293512 | - | 964   | 15.07637 | 0.042959 | 0.400594 | 0.181578 | 2.206185 | 0.029683 | 0.097201 | 1 |
| ENSG0000 response | Inflamed | AC007880  | lincRNA chr2     | 65073264 | 65090760 | - | 1977  | 3.945107 | 0.427208 | -0.3744  | 0.169707 | -2.20617 | 0.029684 | 0.097201 | 1 |
| ENSG0000 response | Inflamed | ALDOB     | protein_cc chr9  | 1.04E+08 | 1.04E+08 | - | 2451  | 5763.129 | 0.004773 | -0.97244 | 0.440783 | -2.20615 | 0.029685 | 0.097201 | 1 |
| ENSG0000 response | Inflamed | CTA-134P2 | antisense chr1   | 1.59E+08 | 1.59E+08 | - | 3548  | 60.16706 | 0.031026 | -0.64353 | 0.291717 | -2.206   | 0.029696 | 0.097217 | 1 |
| ENSG0000 response | Inflamed | MAGI2-AS  | processed_chr7   | 79082198 | 79100524 | + | 9849  | 235.9976 | 0        | -0.45597 | 0.206695 | -2.20599 | 0.029698 | 0.097217 | 1 |
| ENSG0000 response | Inflamed | RP11-2E17 | lincRNA chr15    | 80487826 | 80544555 | - | 6890  | 62.84487 | 0.009547 | 0.398225 | 0.180525 | 2.205928 | 0.029702 | 0.097219 | 1 |
| ENSG0000 response | Inflamed | LPIN1     | protein_cc chr2  | 11817721 | 11967535 | + | 11846 | 2064.461 | 0        | -0.34689 | 0.157296 | -2.20531 | 0.029746 | 0.097345 | 1 |

|                   |          |           |                  |          |          |   |       |          |          |          |          |          |          |          |   |
|-------------------|----------|-----------|------------------|----------|----------|---|-------|----------|----------|----------|----------|----------|----------|----------|---|
| ENSG0000 response | Inflamed | ZC3H12B   | protein_cc chrX  | 64708615 | 64727767 | + | 7256  | 99.06921 | 0.009547 | 0.450695 | 0.20437  | 2.20529  | 0.029748 | 0.097345 | 1 |
| ENSG0000 response | Inflamed | CKLF-CMT1 | protein_cc chr16 | 66586490 | 66613038 | + | 1254  | 12.4821  | 0.071599 | -0.38532 | 0.174734 | -2.20519 | 0.029755 | 0.097358 | 1 |
| ENSG0000 response | Inflamed | AC092171  | antisense chr7   | 5459477  | 5462753  | + | 753   | 2.610979 | 0.372315 | 0.286223 | 0.12981  | 2.204942 | 0.029773 | 0.097403 | 1 |
| ENSG0000 response | Inflamed | CTD-3064  | antisense chr19  | 37988063 | 37997948 | - | 1319  | 16.13126 | 0.011933 | 0.306431 | 0.138982 | 2.204832 | 0.029781 | 0.097417 | 1 |
| ENSG0000 response | Inflamed | SNX29P2   | lincRNA chr16    | 29262829 | 29519817 | + | 9173  | 34.52506 | 0.033413 | -0.48992 | 0.2223   | -2.20388 | 0.02985  | 0.097625 | 1 |
| ENSG0000 response | Inflamed | RP11-566k | pseudoger chr15  | 23095170 | 23115256 | - | 797   | 1.553699 | 0.620525 | -0.27357 | 0.124136 | -2.20382 | 0.029854 | 0.097625 | 1 |
| ENSG0000 response | Inflamed | C1orf227  | protein_cc chr1  | 2.13E+08 | 2.13E+08 | - | 506   | 1.295943 | 0.644391 | -0.24447 | 0.110932 | -2.2038  | 0.029856 | 0.097625 | 1 |
| ENSG0000 response | Inflamed | TRAV39    | TR_V_gen chr14   | 22771939 | 22772438 | + | 331   | 3.346062 | 0.393795 | -0.35256 | 0.159997 | -2.20357 | 0.029872 | 0.097668 | 1 |
| ENSG0000 response | Inflamed | MAP3K13   | protein_cc chr3  | 1.85E+08 | 1.85E+08 | + | 12623 | 1058.191 | 0        | 0.264243 | 0.119919 | 2.203518 | 0.029876 | 0.097668 | 1 |
| ENSG0000 response | Inflamed | TRAPPC3L  | protein_cc chr6  | 1.17E+08 | 1.17E+08 | - | 2757  | 1.801909 | 0.553699 | -0.3028  | 0.13743  | -2.20334 | 0.029889 | 0.097699 | 1 |
| ENSG0000 response | Inflamed | PRR5-ARH  | protein_cc chr22 | 45098113 | 45258586 | + | 3264  | 23.51074 | 0.057279 | 0.517281 | 0.234785 | 2.203208 | 0.029899 | 0.097718 | 1 |
| ENSG0000 response | Inflamed | RP11-379E | lincRNA chr3     | 1.25E+08 | 1.26E+08 | + | 373   | 2.668258 | 0.505967 | 0.346957 | 0.157496 | 2.202953 | 0.029917 | 0.097766 | 1 |
| ENSG0000 response | Inflamed | PTGER1    | protein_cc chr19 | 14583278 | 14586174 | - | 1421  | 73.75418 | 0.002387 | -0.57798 | 0.262432 | -2.2024  | 0.029958 | 0.097887 | 1 |
| ENSG0000 response | Inflamed | RNF144A-1 | processed_chr2   | 7052408  | 7058840  | - | 4648  | 34.68496 | 0.01432  | -0.45116 | 0.204862 | -2.20224 | 0.029969 | 0.097911 | 1 |
| ENSG0000 response | Inflamed | C21orf128 | protein_cc chr21 | 43522244 | 43528644 | - | 2141  | 1.673031 | 0.596659 | -0.27637 | 0.125501 | -2.2021  | 0.02998  | 0.097933 | 1 |
| ENSG0000 response | Inflamed | RP11-420L | pseudoger chr6   | 3754333  | 3755074  | + | 436   | 0.940334 | 0.763723 | -0.22447 | 0.10196  | -2.2016  | 0.030016 | 0.09804  | 1 |
| ENSG0000 response | Inflamed | FABP5P11  | pseudoger chr22  | 17075979 | 17076375 | - | 397   | 4.670644 | 0.186158 | 0.330646 | 0.15021  | 2.201225 | 0.030043 | 0.098117 | 1 |
| ENSG0000 response | Inflamed | TRIP6     | protein_cc chr7  | 1E+08    | 1E+08    | + | 2802  | 1541.821 | 0        | -0.22333 | 0.101465 | -2.20109 | 0.030053 | 0.098136 | 1 |
| ENSG0000 response | Inflamed | MBL1P     | pseudoger chr10  | 81664654 | 81710092 | + | 2616  | 22.90215 | 0.02864  | -0.51184 | 0.232557 | -2.20093 | 0.030065 | 0.098147 | 1 |
| ENSG0000 response | Inflamed | RCN3      | protein_cc chr19 | 50030875 | 50050219 | + | 2093  | 1189.117 | 0        | -0.36384 | 0.165312 | -2.20092 | 0.030066 | 0.098147 | 1 |
| ENSG0000 response | Inflamed | DIRAS3    | protein_cc chr1  | 68511645 | 68517314 | - | 1973  | 30.3222  | 0.01432  | -0.38524 | 0.175037 | -2.20089 | 0.030067 | 0.098147 | 1 |
| ENSG0000 response | Inflamed | FIGF      | protein_cc chrX  | 15363713 | 15402498 | - | 2153  | 9.606205 | 0.088305 | -0.47354 | 0.215165 | -2.20081 | 0.030074 | 0.098154 | 1 |
| ENSG0000 response | Inflamed | GSPT2     | protein_cc chrX  | 51486481 | 51489324 | + | 2844  | 361.4415 | 0        | -0.25448 | 0.115667 | -2.20014 | 0.030123 | 0.09828  | 1 |
| ENSG0000 response | Inflamed | PTCH1     | protein_cc chr9  | 98205262 | 98279339 | - | 16591 | 2973.931 | 0        | 0.464583 | 0.211161 | 2.200131 | 0.030123 | 0.09828  | 1 |
| ENSG0000 response | Inflamed | RP1-178F1 | antisense chr17  | 18171394 | 18172142 | + | 749   | 3.484487 | 0.243437 | 0.282825 | 0.128549 | 2.20013  | 0.030123 | 0.09828  | 1 |
| ENSG0000 response | Inflamed | ALDH16A1  | protein_cc chr19 | 49956426 | 49974305 | + | 4643  | 2062.888 | 0        | -0.17625 | 0.080123 | -2.1998  | 0.030148 | 0.098347 | 1 |
| ENSG0000 response | Inflamed | ZDHC9     | protein_cc chrX  | 1.29E+08 | 1.29E+08 | - | 5243  | 2933.802 | 0        | 0.185986 | 0.084556 | 2.199554 | 0.030166 | 0.098393 | 1 |
| ENSG0000 response | Inflamed | FAM221B   | protein_cc chr9  | 35816388 | 35828744 | - | 3941  | 9.513126 | 0.143198 | 0.441574 | 0.200818 | 2.198872 | 0.030215 | 0.098544 | 1 |
| ENSG0000 response | Inflamed | TOB2      | protein_cc chr22 | 41829496 | 41843027 | - | 4565  | 4802.468 | 0        | 0.232009 | 0.105521 | 2.198693 | 0.030229 | 0.098575 | 1 |
| ENSG0000 response | Inflamed | DDX28     | protein_cc chr16 | 68055179 | 68057770 | - | 2592  | 375.9928 | 0        | -0.16716 | 0.076048 | -2.19804 | 0.030276 | 0.098708 | 1 |
| ENSG0000 response | Inflamed | PREP      | protein_cc chr6  | 1.06E+08 | 1.06E+08 | - | 3762  | 3733.685 | 0        | 0.238008 | 0.108282 | 2.198035 | 0.030277 | 0.098708 | 1 |
| ENSG0000 response | Inflamed | MTND2P2   | pseudoger chr1   | 565020   | 566063   | + | 1044  | 3678.723 | 0        | 0.35132  | 0.159842 | 2.197925 | 0.030285 | 0.098722 | 1 |
| ENSG0000 response | Inflamed | SLC4A2    | protein_cc chr7  | 1.51E+08 | 1.51E+08 | + | 7590  | 4335.215 | 0        | -0.22674 | 0.10317  | -2.1977  | 0.030302 | 0.098764 | 1 |
| ENSG0000 response | Inflamed | FLJ00418  | protein_cc chr16 | 70695570 | 70699739 | + | 4170  | 15.75179 | 0.042959 | -0.39873 | 0.181448 | -2.19751 | 0.030316 | 0.098797 | 1 |
| ENSG0000 response | Inflamed | COX7A2    | protein_cc chr6  | 75947391 | 75960039 | - | 1922  | 3200.265 | 0        | 0.285575 | 0.129985 | 2.196976 | 0.030355 | 0.098913 | 1 |
| ENSG0000 response | Inflamed | LINC00886 | lincRNA chr3     | 1.56E+08 | 1.57E+08 | - | 3822  | 52       | 0.004773 | 0.376153 | 0.171225 | 2.196833 | 0.030365 | 0.098935 | 1 |
| ENSG0000 response | Inflamed | RP11-1101 | antisense chr5   | 1.77E+08 | 1.77E+08 | + | 431   | 2.093079 | 0.5179   | 0.311508 | 0.14181  | 2.196655 | 0.030378 | 0.098965 | 1 |
| ENSG0000 response | Inflamed | CHEK1     | protein_cc chr11 | 1.25E+08 | 1.26E+08 | + | 6550  | 300.8258 | 0        | -0.31897 | 0.145238 | -2.19621 | 0.030411 | 0.09906  | 1 |
| ENSG0000 response | Inflamed | NKAIN2    | protein_cc chr6  | 1.24E+08 | 1.25E+08 | + | 4076  | 7.988067 | 0.546539 | 0.435037 | 0.198123 | 2.195792 | 0.030442 | 0.099137 | 1 |
| ENSG0000 response | Inflamed | RPL7P23p  | pseudoger chr5   | 76878198 | 76879010 | + | 813   | 19.55847 | 0.00716  | 0.338448 | 0.154138 | 2.19574  | 0.030446 | 0.099137 | 1 |

|          |           |          |           |                  |          |          |   |      |          |          |          |          |          |          |          |          |
|----------|-----------|----------|-----------|------------------|----------|----------|---|------|----------|----------|----------|----------|----------|----------|----------|----------|
| ENSG0000 | response  | Inflamed | FAM171B   | protein_cc chr2  | 1.88E+08 | 1.88E+08 | + | 5819 | 133.1718 | 0.002387 | -0.47262 | 0.215245 | -2.19573 | 0.030446 | 0.099137 | 1        |
| ENSG0000 | response  | Inflamed | INSL4     | protein_cc chr9  | 5231419  | 5235304  | + | 1952 | 3.880668 | 0.575179 | -0.51517 | 0.234642 | -2.19558 | 0.030458 | 0.099163 | 1        |
| ENSG0000 | response  | Inflamed | CACNB2    | protein_cc chr10 | 18429606 | 18830798 | + | 6537 | 256.4415 | 0.002387 | 0.508857 | 0.231795 | 2.195292 | 0.030479 | 0.099219 | 1        |
| ENSG0000 | response  | Inflamed | ARHGEF5   | protein_cc chr7  | 1.44E+08 | 1.44E+08 | + | 5818 | 1384.857 | 0        | 0.272565 | 0.124162 | 2.195244 | 0.030483 | 0.099219 | 1        |
| ENSG0000 | response  | Inflamed | RP11-253M | sense_intr chr15 | 69683531 | 69684488 | + | 694  | 3.883055 | 0.336516 | 0.334102 | 0.152223 | 2.194818 | 0.030514 | 0.099309 | 1        |
| ENSG0000 | response  | Inflamed | CDK5      | protein_cc chr7  | 1.51E+08 | 1.51E+08 | - | 2938 | 332.821  | 0        | -0.19974 | 0.091009 | -2.19473 | 0.03052  | 0.099317 | 1        |
| ENSG0000 | response  | Inflamed | MPP6      | protein_cc chr7  | 24612887 | 24733812 | + | 9369 | 88.50358 | 0.009547 | -0.48437 | 0.220768 | -2.19401 | 0.030574 | 0.099478 | 1        |
| ENSG0000 | response  | Inflamed | RP1-127C7 | lincRNA chr1     | 1.84E+08 | 1.84E+08 | - | 646  | 2.560859 | 0.393795 | -0.30882 | 0.140759 | -2.19395 | 0.030578 | 0.099481 | 1        |
| ENSG0000 | response  | Inflamed | ZNF681    | protein_cc chr19 | 23921997 | 23941693 | - | 6497 | 103.8807 | 0.002387 | 0.427684 | 0.194996 | 2.193299 | 0.030627 | 0.099626 | 1        |
| ENSG0000 | response  | Inflamed | ANO3      | protein_cc chr11 | 26210829 | 26684835 | + | 7749 | 1.558473 | 0.727924 | -0.35792 | 0.163204 | -2.19308 | 0.030643 | 0.099667 | 1        |
| ENSG0000 | response  | Inflamed | TNFSF9    | protein_cc chr19 | 6531010  | 6535931  | + | 1657 | 111.0143 | 0.004773 | -0.56279 | 0.256641 | -2.19291 | 0.030656 | 0.099696 | 1        |
| ENSG0000 | response  | Inflamed | SCARNA17  | snoRNA chr18     | 47340503 | 47340646 | + | 144  | 4.398568 | 0.138425 | 0.260466 | 0.118784 | 2.192772 | 0.030666 | 0.099716 | 1        |
| ENSG0000 | response  | Inflamed | RP11-872J | antisense chr14  | 96967147 | 96968658 | - | 1512 | 24.13604 | 0        | 0.224286 | 0.102292 | 2.192607 | 0.030678 | 0.099744 | 1        |
| ENSG0000 | response  | Inflamed | PPIAP30   | pseudoger chr10  | 15196801 | 15197319 | - | 519  | 1.336516 | 0.656325 | 0.208701 | 0.095189 | 2.192497 | 0.030686 | 0.09975  | 1        |
| ENSG0000 | response  | Inflamed | CTBP2P7   | pseudoger chr19  | 36987818 | 36989061 | - | 1244 | 0.832936 | 0.787589 | -0.21525 | 0.098176 | -2.19248 | 0.030688 | 0.09975  | 1        |
| ENSG0000 | response  | Inflamed | RP1-261D7 | antisense chr14  | 71759442 | 71788531 | - | 977  | 13.69451 | 0.02148  | 0.313377 | 0.142964 | 2.192008 | 0.030723 | 0.099851 | 1        |
| ENSG0000 | response  | Inflamed | IGHV3-66  | IG_V_gene chr14  | 1.07E+08 | 1.07E+08 | - | 427  | 844.222  | 0.01432  | -0.76895 | 0.350826 | -2.19183 | 0.030736 | 0.099881 | 1        |
| ENSG0000 | response  | Inflamed | RP11-343E | pseudoger chr3   | 1.42E+08 | 1.42E+08 | - | 576  | 5.579952 | 0.090692 | 0.278931 | 0.127266 | 2.191722 | 0.030744 | 0.099896 | 1        |
| ENSG0000 | response  | Inflamed | ZEB2-AS1  | antisense chr2   | 1.45E+08 | 1.45E+08 | + | 2697 | 12.04535 | 0.069212 | -0.40699 | 0.185708 | -2.19156 | 0.030756 | 0.099923 | 1        |
| ENSG0000 | response  | Inflamed | RGS11     | protein_cc chr16 | 318300   | 325980   | - | 4798 | 170.7542 | 0.004773 | 0.459603 | 0.209741 | 2.191294 | 0.030776 | 0.099975 | 1        |
| ENSG0000 | mucosal h | Inflamed | UCK2      | protein_cc chr1  | 1.66E+08 | 1.66E+08 | + | 6756 | 2077.363 | 0        | 0.600406 | 0.085014 | 7.062465 | 2.30E-10 | 1.71E-06 | 6.04E-06 |
| ENSG0000 | mucosal h | Inflamed | RP11-396C | lincRNA chr11    | 15723509 | 15780444 | - | 993  | 83.0716  | 0.097852 | 2.480029 | 0.354395 | 6.997921 | 3.13E-10 | 1.71E-06 | 8.22E-06 |
| ENSG0000 | mucosal h | Inflamed | AP001046  | lincRNA chr21    | 44778027 | 44782229 | - | 2798 | 88.71838 | 0.009547 | -1.8421  | 0.265755 | -6.93158 | 4.29E-10 | 1.71E-06 | 1.13E-05 |
| ENSG0000 | mucosal h | Inflamed | RN7SKP12  | misc_RNA chr16   | 29742372 | 29742725 | - | 354  | 26.67064 | 0.27685  | 2.072523 | 0.299672 | 6.915972 | 4.62E-10 | 1.71E-06 | 1.21E-05 |
| ENSG0000 | mucosal h | Inflamed | PIM2      | protein_cc chrX  | 48770459 | 48776301 | - | 2761 | 7614.1   | 0        | -1.88359 | 0.273502 | -6.88693 | 5.30E-10 | 1.71E-06 | 1.39E-05 |
| ENSG0000 | mucosal h | Inflamed | RP11-107C | protein_cc chr14 | 95982473 | 95984248 | + | 993  | 60.642   | 0.009547 | -2.03949 | 0.296545 | -6.87751 | 5.55E-10 | 1.71E-06 | 1.46E-05 |
| ENSG0000 | mucosal h | Inflamed | FKBP11    | protein_cc chr12 | 49315301 | 49320257 | - | 4957 | 3185.27  | 0        | -1.16733 | 0.169751 | -6.87672 | 5.57E-10 | 1.71E-06 | 1.46E-05 |
| ENSG0000 | mucosal h | Inflamed | FCN3      | protein_cc chr1  | 27695603 | 27701315 | - | 2167 | 72.77566 | 0.047733 | -2.39089 | 0.348068 | -6.86902 | 5.77E-10 | 1.71E-06 | 1.52E-05 |
| ENSG0000 | mucosal h | Inflamed | FPR1      | protein_cc chr19 | 52248425 | 52307363 | - | 2594 | 870.6014 | 0.004773 | -3.40474 | 0.497141 | -6.84865 | 6.36E-10 | 1.71E-06 | 1.67E-05 |
| ENSG0000 | mucosal h | Inflamed | RAB40B    | protein_cc chr17 | 80612849 | 80656604 | - | 6194 | 803.2124 | 0        | 0.816793 | 0.119338 | 6.844358 | 6.49E-10 | 1.71E-06 | 1.71E-05 |
| ENSG0000 | mucosal h | Inflamed | AC092652  | antisense chr2   | 1.44E+08 | 1.44E+08 | - | 735  | 3        | 0.53222  | 1.119151 | 0.164445 | 6.805627 | 7.80E-10 | 1.80E-06 | 2.05E-05 |
| ENSG0000 | mucosal h | Inflamed | XBP1      | protein_cc chr22 | 29190543 | 29196585 | - | 3028 | 22224.73 | 0        | -1.17675 | 0.173565 | -6.77985 | 8.81E-10 | 1.80E-06 | 2.32E-05 |
| ENSG0000 | mucosal h | Inflamed | FBXO6     | protein_cc chr1  | 11724181 | 11734411 | + | 1811 | 569.2482 | 0        | -0.86869 | 0.128163 | -6.778   | 8.88E-10 | 1.80E-06 | 2.34E-05 |
| ENSG0000 | mucosal h | Inflamed | ZBP1      | protein_cc chr20 | 56178902 | 56195632 | - | 5413 | 1313.508 | 0        | -1.64309 | 0.2437   | -6.74224 | 1.05E-09 | 1.98E-06 | 2.77E-05 |
| ENSG0000 | mucosal h | Inflamed | IGKV1-37  | IG_V_gene chr2   | 89597021 | 89597542 | - | 398  | 12.03341 | 0.131265 | -1.75041 | 0.262031 | -6.68017 | 1.41E-09 | 2.47E-06 | 3.70E-05 |
| ENSG0000 | mucosal h | Inflamed | MOBP      | protein_cc chr3  | 39508689 | 39570970 | + | 9237 | 14.57518 | 0.183771 | 1.481387 | 0.224015 | 6.612896 | 1.93E-09 | 3.04E-06 | 5.08E-05 |
| ENSG0000 | mucosal h | Inflamed | PADI2     | protein_cc chr1  | 17393256 | 17445948 | - | 6002 | 14448.26 | 0        | 2.146806 | 0.324813 | 6.609364 | 1.96E-09 | 3.04E-06 | 5.16E-05 |
| ENSG0000 | mucosal h | Inflamed | TNNC2     | protein_cc chr20 | 44451853 | 44462384 | - | 876  | 49.20286 | 0.019093 | 1.73769  | 0.267819 | 6.48831  | 3.46E-09 | 4.66E-06 | 9.09E-05 |
| ENSG0000 | mucosal h | Inflamed | MZB1      | protein_cc chr5  | 1.39E+08 | 1.39E+08 | - | 2273 | 6434.499 | 0        | -1.98246 | 0.305797 | -6.48294 | 3.54E-09 | 4.66E-06 | 9.32E-05 |
| ENSG0000 | mucosal h | Inflamed | CXCR1     | protein_cc chr2  | 2.19E+08 | 2.19E+08 | - | 2488 | 659.673  | 0.047733 | -3.78152 | 0.5834   | -6.48188 | 3.56E-09 | 4.66E-06 | 9.36E-05 |

|          |           |          |           |                  |          |          |   |      |          |          |          |          |          |          |          |          |
|----------|-----------|----------|-----------|------------------|----------|----------|---|------|----------|----------|----------|----------|----------|----------|----------|----------|
| ENSG0000 | mucosal h | Inflamed | CHI3L1    | protein_cc chr1  | 2.03E+08 | 2.03E+08 | - | 3408 | 5806.971 | 0.002387 | -3.81241 | 0.589044 | -6.4722  | 3.73E-09 | 4.66E-06 | 9.80E-05 |
| ENSG0000 | mucosal h | Inflamed | FAM92B    | protein_cc chr16 | 85131965 | 85146114 | - | 1897 | 51.49881 | 0.042959 | -2.32952 | 0.36353  | -6.40805 | 5.02E-09 | 5.73E-06 | 0.000132 |
| ENSG0000 | mucosal h | Inflamed | CDK20     | protein_cc chr9  | 90581356 | 90589668 | - | 5727 | 349.6516 | 0        | 0.958268 | 0.14974  | 6.399545 | 5.22E-09 | 5.73E-06 | 0.000137 |
| ENSG0000 | mucosal h | Inflamed | AC110619  | pseudoger chr2   | 2.41E+08 | 2.41E+08 | - | 1667 | 11.68496 | 0.212411 | 1.657276 | 0.258985 | 6.399118 | 5.23E-09 | 5.73E-06 | 0.000138 |
| ENSG0000 | mucosal h | Inflamed | SIL1      | protein_cc chr5  | 1.38E+08 | 1.39E+08 | - | 4011 | 1494.594 | 0        | -0.61701 | 0.096836 | -6.37172 | 5.94E-09 | 6.11E-06 | 0.000156 |
| ENSG0000 | mucosal h | Inflamed | HM13      | protein_cc chr20 | 30102231 | 30157370 | + | 5701 | 6862.408 | 0        | -0.60449 | 0.094929 | -6.36781 | 6.05E-09 | 6.11E-06 | 0.000159 |
| ENSG0000 | mucosal h | Inflamed | S100A8    | protein_cc chr1  | 1.53E+08 | 1.53E+08 | - | 1006 | 1747.105 | 0        | -3.78426 | 0.595955 | -6.34991 | 6.57E-09 | 6.39E-06 | 0.000173 |
| ENSG0000 | mucosal h | Inflamed | MMP7      | protein_cc chr11 | 1.02E+08 | 1.02E+08 | - | 2323 | 569.074  | 0.095465 | -3.78465 | 0.599545 | -6.31255 | 7.80E-09 | 7.33E-06 | 0.000205 |
| ENSG0000 | mucosal h | Inflamed | CDC25B    | protein_cc chr20 | 3767578  | 3786762  | + | 4149 | 3511.518 | 0        | -0.95488 | 0.151618 | -6.2979  | 8.35E-09 | 7.45E-06 | 0.000219 |
| ENSG0000 | mucosal h | Inflamed | GZMB      | protein_cc chr14 | 25100160 | 25103473 | - | 1408 | 226.1504 | 0        | -1.86761 | 0.296732 | -6.29394 | 8.50E-09 | 7.45E-06 | 0.000223 |
| ENSG0000 | mucosal h | Inflamed | CTC-5580  | antisense chr5   | 1.68E+08 | 1.68E+08 | + | 3478 | 45.07876 | 0.071599 | 2.031909 | 0.323693 | 6.277276 | 9.18E-09 | 7.78E-06 | 0.000241 |
| ENSG0000 | mucosal h | Inflamed | FCRLB     | protein_cc chr1  | 1.62E+08 | 1.62E+08 | + | 2592 | 55.11217 | 0.00716  | -1.59816 | 0.255775 | -6.24829 | 1.05E-08 | 8.19E-06 | 0.000276 |
| ENSG0000 | mucosal h | Inflamed | IGKV1-5   | IG_V_gene chr2   | 89246819 | 89247475 | - | 532  | 33498.81 | 0        | -2.13985 | 0.342496 | -6.24781 | 1.05E-08 | 8.19E-06 | 0.000276 |
| ENSG0000 | mucosal h | Inflamed | CFB       | protein_cc chr6  | 31895475 | 31919861 | + | 6622 | 1577.456 | 0        | -1.45805 | 0.23364  | -6.24058 | 1.09E-08 | 8.19E-06 | 0.000286 |
| ENSG0000 | mucosal h | Inflamed | SYT17     | protein_cc chr16 | 19179293 | 19279652 | + | 7534 | 170.8926 | 0        | 1.005076 | 0.161076 | 6.239752 | 1.09E-08 | 8.19E-06 | 0.000287 |
| ENSG0000 | mucosal h | Inflamed | MT3       | protein_cc chr16 | 56622986 | 56625000 | + | 1837 | 9.128878 | 0.281623 | 1.301468 | 0.209191 | 6.221418 | 1.19E-08 | 8.60E-06 | 0.000312 |
| ENSG0000 | mucosal h | Inflamed | AP000344  | lincRNA chr22    | 23775751 | 23777258 | + | 1083 | 28.17422 | 0.109785 | 1.659412 | 0.266919 | 6.216923 | 1.21E-08 | 8.60E-06 | 0.000318 |
| ENSG0000 | mucosal h | Inflamed | CLDN14    | protein_cc chr21 | 37832919 | 37948867 | - | 2853 | 37.84964 | 0.057279 | -1.73007 | 0.278968 | -6.2017  | 1.30E-08 | 8.79E-06 | 0.000341 |
| ENSG0000 | mucosal h | Inflamed | RP11-431J | antisense chrX   | 16171064 | 16188992 | - | 1219 | 3.212411 | 0.637232 | 1.015016 | 0.163764 | 6.198035 | 1.32E-08 | 8.79E-06 | 0.000347 |
| ENSG0000 | mucosal h | Inflamed | CPNE5     | protein_cc chr6  | 36708552 | 36807778 | - | 4067 | 1716.451 | 0        | -1.16164 | 0.187511 | -6.19505 | 1.34E-08 | 8.79E-06 | 0.000352 |
| ENSG0000 | mucosal h | Inflamed | UGT2B10   | protein_cc chr4  | 69681711 | 69696914 | + | 1931 | 4.46778  | 0.491647 | 1.080874 | 0.174884 | 6.180516 | 1.43E-08 | 8.91E-06 | 0.000376 |
| ENSG0000 | mucosal h | Inflamed | IGKV1-16  | IG_V_gene chr2   | 89399352 | 89399854 | - | 378  | 5157.01  | 0        | -2.03632 | 0.329844 | -6.17358 | 1.48E-08 | 8.91E-06 | 0.000388 |
| ENSG0000 | mucosal h | Inflamed | S100A9    | protein_cc chr1  | 1.53E+08 | 1.53E+08 | + | 577  | 4812.239 | 0        | -3.26986 | 0.52966  | -6.17352 | 1.48E-08 | 8.91E-06 | 0.000388 |
| ENSG0000 | mucosal h | Inflamed | TPST2     | protein_cc chr22 | 26921458 | 26992681 | - | 3448 | 1234.384 | 0        | -0.86241 | 0.139746 | -6.1713  | 1.49E-08 | 8.91E-06 | 0.000392 |
| ENSG0000 | mucosal h | Inflamed | CXCL1     | protein_cc chr4  | 74735110 | 74736959 | + | 1296 | 4821.072 | 0        | -2.75038 | 0.446537 | -6.15936 | 1.57E-08 | 9.20E-06 | 0.000414 |
| ENSG0000 | mucosal h | Inflamed | ME3       | protein_cc chr11 | 86152150 | 86383678 | - | 3838 | 662.2005 | 0        | 0.671775 | 0.109258 | 6.148501 | 1.65E-08 | 9.46E-06 | 0.000435 |
| ENSG0000 | mucosal h | Inflamed | MAGI1-IT1 | sense_intr chr3  | 65858490 | 65940233 | - | 2567 | 7.680191 | 0.143198 | 1.268757 | 0.206568 | 6.142088 | 1.70E-08 | 9.53E-06 | 0.000448 |
| ENSG0000 | mucosal h | Inflamed | IGHV4-34  | IG_V_gene chr14  | 1.07E+08 | 1.07E+08 | - | 400  | 10580.37 | 0        | -2.45257 | 0.400295 | -6.1269  | 1.83E-08 | 9.86E-06 | 0.00048  |
| ENSG0000 | mucosal h | Inflamed | CTB-43E15 | lincRNA chr5     | 1.73E+08 | 1.73E+08 | - | 1839 | 9.661098 | 0.329356 | -1.78611 | 0.291588 | -6.12546 | 1.84E-08 | 9.86E-06 | 0.000483 |
| ENSG0000 | mucosal h | Inflamed | RP3-407E4 | pseudoger chr6   | 64150671 | 64153485 | + | 968  | 3.245823 | 0.610979 | 1.251039 | 0.205057 | 6.100939 | 2.05E-08 | 1.06E-05 | 0.00054  |
| ENSG0000 | mucosal h | Inflamed | PNLIPRP1  | protein_cc chr10 | 1.18E+08 | 1.18E+08 | + | 4986 | 1.656325 | 0.689737 | 0.770766 | 0.126356 | 6.099968 | 2.06E-08 | 1.06E-05 | 0.000543 |
| ENSG0000 | mucosal h | Inflamed | UBE2L6    | protein_cc chr11 | 57319129 | 57335757 | - | 2197 | 2738.088 | 0        | -1.06688 | 0.17519  | -6.08985 | 2.16E-08 | 1.09E-05 | 0.000568 |
| ENSG0000 | mucosal h | Inflamed | IL15RA    | protein_cc chr10 | 5990855  | 6020150  | - | 3168 | 1020.833 | 0        | -0.78679 | 0.129503 | -6.0755  | 2.31E-08 | 1.14E-05 | 0.000606 |
| ENSG0000 | mucosal h | Inflamed | TINCR     | lincRNA chr19    | 5558178  | 5568045  | - | 3925 | 171.8067 | 0        | 1.577895 | 0.260173 | 6.064784 | 2.42E-08 | 1.15E-05 | 0.000637 |
| ENSG0000 | mucosal h | Inflamed | PNOC      | protein_cc chr8  | 28174503 | 28200872 | + | 2126 | 246.0573 | 0        | -1.79136 | 0.295373 | -6.06475 | 2.42E-08 | 1.15E-05 | 0.000637 |
| ENSG0000 | mucosal h | Inflamed | GNA15     | protein_cc chr19 | 3136191  | 3163767  | + | 2613 | 803.0692 | 0        | -1.23329 | 0.203418 | -6.06283 | 2.44E-08 | 1.15E-05 | 0.000642 |
| ENSG0000 | mucosal h | Inflamed | HLA-DRB1  | protein_cc chr6  | 32546546 | 32557625 | - | 1229 | 9992.487 | 0        | -0.93679 | 0.154831 | -6.05036 | 2.58E-08 | 1.18E-05 | 0.00068  |
| ENSG0000 | mucosal h | Inflamed | IP6K2     | protein_cc chr3  | 48725436 | 48777786 | - | 5624 | 3219.933 | 0        | 0.628396 | 0.103951 | 6.045133 | 2.65E-08 | 1.18E-05 | 0.000696 |
| ENSG0000 | mucosal h | Inflamed | IGHG4     | IG_C_gene chr14  | 1.06E+08 | 1.06E+08 | - | 1110 | 20595.28 | 0        | -2.95491 | 0.488835 | -6.04479 | 2.65E-08 | 1.18E-05 | 0.000697 |
| ENSG0000 | mucosal h | Inflamed | CTD-2589  | pseudoger chr5   | 767512   | 769046   | - | 225  | 2.694511 | 0.51074  | 0.993147 | 0.164418 | 6.040374 | 2.70E-08 | 1.18E-05 | 0.000711 |

|          |           |          |           |            |       |          |          |   |       |          |          |          |          |          |          |          |          |
|----------|-----------|----------|-----------|------------|-------|----------|----------|---|-------|----------|----------|----------|----------|----------|----------|----------|----------|
| ENSG0000 | mucosal h | Inflamed | IGKV3-11  | IG_V_gene  | chr2  | 89326668 | 89327228 | - | 392   | 33944.01 | 0        | -2.0266  | 0.335673 | -6.0374  | 2.74E-08 | 1.18E-05 | 0.000721 |
| ENSG0000 | mucosal h | Inflamed | KRT6B     | protein_cc | chr12 | 52840435 | 52845910 | - | 2282  | 280.5084 | 0.119332 | -3.21631 | 0.53626  | -5.99768 | 3.28E-08 | 1.39E-05 | 0.000862 |
| ENSG0000 | mucosal h | Inflamed | EMR3      | protein_cc | chr19 | 14729929 | 14800839 | - | 2837  | 147.7947 | 0        | -1.95854 | 0.32686  | -5.992   | 3.37E-08 | 1.39E-05 | 0.000885 |
| ENSG0000 | mucosal h | Inflamed | DERL3     | protein_cc | chr22 | 24176690 | 24181315 | - | 3796  | 5759.993 | 0        | -1.6943  | 0.28281  | -5.99094 | 3.38E-08 | 1.39E-05 | 0.000889 |
| ENSG0000 | mucosal h | Inflamed | RP11-728F | antisense  | chr11 | 1.18E+08 | 1.18E+08 | + | 1464  | 15.64678 | 0.047733 | 1.071972 | 0.179229 | 5.981009 | 3.54E-08 | 1.43E-05 | 0.00093  |
| ENSG0000 | mucosal h | Inflamed | BATF      | protein_cc | chr14 | 75988768 | 76013358 | + | 980   | 225.3341 | 0        | -1.50506 | 0.251995 | -5.97257 | 3.67E-08 | 1.46E-05 | 0.000966 |
| ENSG0000 | mucosal h | Inflamed | SLC7A5    | protein_cc | chr16 | 87863629 | 87903094 | - | 4745  | 2536.912 | 0        | -1.50396 | 0.251924 | -5.9699  | 3.72E-08 | 1.46E-05 | 0.000977 |
| ENSG0000 | mucosal h | Inflamed | DUOXA2    | protein_cc | chr15 | 45406519 | 45410619 | + | 2554  | 8410.351 | 0.002387 | -3.39333 | 0.569523 | -5.95819 | 3.92E-08 | 1.51E-05 | 0.00103  |
| ENSG0000 | mucosal h | Inflamed | ANKH      | protein_cc | chr5  | 14704910 | 14871887 | - | 10868 | 3722.637 | 0        | 0.615582 | 0.103361 | 5.955645 | 3.96E-08 | 1.51E-05 | 0.001042 |
| ENSG0000 | mucosal h | Inflamed | MIXL1     | protein_cc | chr1  | 2.26E+08 | 2.26E+08 | + | 2029  | 118.8663 | 0        | -1.74123 | 0.292522 | -5.95248 | 4.02E-08 | 1.51E-05 | 0.001057 |
| ENSG0000 | mucosal h | Inflamed | UNC13D    | protein_cc | chr17 | 73823306 | 73840798 | - | 7752  | 4544.162 | 0        | -0.9613  | 0.161595 | -5.9488  | 4.09E-08 | 1.51E-05 | 0.001075 |
| ENSG0000 | mucosal h | Inflamed | CRELD2    | protein_cc | chr22 | 50311815 | 50321188 | + | 5165  | 2782.222 | 0        | -0.69317 | 0.116612 | -5.94429 | 4.17E-08 | 1.52E-05 | 0.001097 |
| ENSG0000 | mucosal h | Inflamed | FCN1      | protein_cc | chr9  | 1.38E+08 | 1.38E+08 | - | 1286  | 480.4439 | 0.002387 | -2.32319 | 0.391015 | -5.94143 | 4.23E-08 | 1.52E-05 | 0.001111 |
| ENSG0000 | mucosal h | Inflamed | IGLV6-57  | IG_V_gene  | chr22 | 22550113 | 22550860 | + | 623   | 4690.31  | 0        | -2.24762 | 0.378902 | -5.93193 | 4.41E-08 | 1.57E-05 | 0.001159 |
| ENSG0000 | mucosal h | Inflamed | RP11-781F | antisense  | chr18 | 6954676  | 6957418  | + | 2295  | 3.656325 | 0.463007 | 1.035172 | 0.174752 | 5.923663 | 4.58E-08 | 1.60E-05 | 0.001203 |
| ENSG0000 | mucosal h | Inflamed | CHAC1     | protein_cc | chr15 | 41245160 | 41248710 | + | 2051  | 337.7088 | 0        | -1.44142 | 0.243414 | -5.9217  | 4.62E-08 | 1.60E-05 | 0.001214 |
| ENSG0000 | mucosal h | Inflamed | IGKV6-21  | IG_V_gene  | chr2  | 89459235 | 89459850 | - | 406   | 866.5823 | 0.002387 | -2.11448 | 0.357248 | -5.9188  | 4.68E-08 | 1.60E-05 | 0.00123  |
| ENSG0000 | mucosal h | Inflamed | NR6A1     | protein_cc | chr9  | 1.27E+08 | 1.28E+08 | - | 7124  | 428.1575 | 0        | 1.150109 | 0.194922 | 5.900341 | 5.08E-08 | 1.67E-05 | 0.001336 |
| ENSG0000 | mucosal h | Inflamed | BHLHA15   | protein_cc | chr7  | 97840739 | 97842291 | + | 798   | 422.6301 | 0        | -1.57202 | 0.266434 | -5.9002  | 5.09E-08 | 1.67E-05 | 0.001337 |
| ENSG0000 | mucosal h | Inflamed | RP5-894D  | lincRNA    | chr6  | 1.71E+08 | 1.71E+08 | - | 1953  | 5.312649 | 0.145585 | 0.971686 | 0.164744 | 5.898158 | 5.13E-08 | 1.67E-05 | 0.001349 |
| ENSG0000 | mucosal h | Inflamed | S100A11   | protein_cc | chr1  | 1.52E+08 | 1.52E+08 | - | 680   | 12689.97 | 0        | -0.87967 | 0.149145 | -5.89809 | 5.13E-08 | 1.67E-05 | 0.00135  |
| ENSG0000 | mucosal h | Inflamed | GLT1D1    | protein_cc | chr12 | 1.29E+08 | 1.29E+08 | + | 3474  | 117.1695 | 0.078759 | -2.57657 | 0.437427 | -5.8903  | 5.32E-08 | 1.69E-05 | 0.001398 |
| ENSG0000 | mucosal h | Inflamed | KLK4      | protein_cc | chr19 | 51409608 | 51413994 | - | 1935  | 21.04535 | 0.164678 | 1.777693 | 0.30183  | 5.889724 | 5.33E-08 | 1.69E-05 | 0.001401 |
| ENSG0000 | mucosal h | Inflamed | RP11-415C | lincRNA    | chr4  | 27219101 | 27283847 | + | 2802  | 1.145585 | 0.75895  | 0.600544 | 0.102049 | 5.884832 | 5.45E-08 | 1.70E-05 | 0.001432 |
| ENSG0000 | mucosal h | Inflamed | IGLV9-49  | IG_V_gene  | chr22 | 22697539 | 22698084 | + | 409   | 434.5394 | 0.004773 | -2.29608 | 0.390304 | -5.88279 | 5.50E-08 | 1.70E-05 | 0.001445 |
| ENSG0000 | mucosal h | Inflamed | PRKG2     | protein_cc | chr4  | 82009837 | 82136218 | - | 3751  | 94.65394 | 0.031026 | 1.730508 | 0.294675 | 5.872603 | 5.75E-08 | 1.75E-05 | 0.001513 |
| ENSG0000 | mucosal h | Inflamed | IGKV3-20  | IG_V_gene  | chr2  | 89442057 | 89442643 | - | 400   | 57836.42 | 0        | -2.05569 | 0.350127 | -5.87126 | 5.79E-08 | 1.75E-05 | 0.001522 |
| ENSG0000 | mucosal h | Inflamed | IGLC6     | IG_C_pseu  | chr22 | 23261707 | 23262023 | + | 317   | 240.6635 | 0.004773 | -1.7391  | 0.296376 | -5.86788 | 5.88E-08 | 1.75E-05 | 0.001545 |
| ENSG0000 | mucosal h | Inflamed | ARPC1B    | protein_cc | chr7  | 98971872 | 98992424 | + | 3979  | 5711.695 | 0        | -0.54068 | 0.092163 | -5.86657 | 5.91E-08 | 1.75E-05 | 0.001554 |
| ENSG0000 | mucosal h | Inflamed | JSRP1     | protein_cc | chr19 | 2252251  | 2269758  | - | 1955  | 363.5036 | 0        | -1.89886 | 0.323832 | -5.86373 | 5.99E-08 | 1.75E-05 | 0.001574 |
| ENSG0000 | mucosal h | Inflamed | ISG20     | protein_cc | chr15 | 89179384 | 89199714 | + | 7363  | 2719.723 | 0        | -0.8759  | 0.149561 | -5.85651 | 6.18E-08 | 1.79E-05 | 0.001626 |
| ENSG0000 | mucosal h | Inflamed | ADA       | protein_cc | chr20 | 43248163 | 43280874 | - | 2852  | 407.9666 | 0        | -1.13587 | 0.194131 | -5.85108 | 6.34E-08 | 1.81E-05 | 0.001666 |
| ENSG0000 | mucosal h | Inflamed | CAMK1D    | protein_cc | chr10 | 12391481 | 12877545 | + | 8746  | 2599.831 | 0        | 0.914441 | 0.156452 | 5.844874 | 6.51E-08 | 1.83E-05 | 0.001712 |
| ENSG0000 | mucosal h | Inflamed | TNFRSF8   | protein_cc | chr1  | 12123434 | 12204264 | + | 3738  | 102.315  | 0.011933 | -1.86199 | 0.318884 | -5.83908 | 6.68E-08 | 1.83E-05 | 0.001757 |
| ENSG0000 | mucosal h | Inflamed | SAA1      | protein_cc | chr11 | 18287721 | 18291524 | + | 765   | 545.8831 | 0.052506 | -3.54388 | 0.606942 | -5.83891 | 6.69E-08 | 1.83E-05 | 0.001758 |
| ENSG0000 | mucosal h | Inflamed | MDFI      | protein_cc | chr6  | 41604620 | 41621984 | + | 2523  | 357.9379 | 0.002387 | -1.62162 | 0.277803 | -5.8373  | 6.74E-08 | 1.83E-05 | 0.001771 |
| ENSG0000 | mucosal h | Inflamed | IGLV4-69  | IG_V_gene  | chr22 | 22385332 | 22385870 | + | 419   | 2909.463 | 0        | -2.08332 | 0.357085 | -5.83423 | 6.83E-08 | 1.83E-05 | 0.001796 |
| ENSG0000 | mucosal h | Inflamed | IGKV4-1   | IG_V_gene  | chr2  | 89184913 | 89185669 | + | 538   | 24495.63 | 0        | -2.0521  | 0.351753 | -5.83391 | 6.84E-08 | 1.83E-05 | 0.001798 |
| ENSG0000 | mucosal h | Inflamed | IGKV2D-28 | IG_V_gene  | chr2  | 89998789 | 89999564 | + | 402   | 450.6014 | 0.002387 | -1.87739 | 0.321874 | -5.83269 | 6.88E-08 | 1.83E-05 | 0.001808 |
| ENSG0000 | mucosal h | Inflamed | TCN1      | protein_cc | chr11 | 59620273 | 59634048 | - | 1586  | 377.2959 | 0.112172 | -3.22074 | 0.552427 | -5.83016 | 6.95E-08 | 1.83E-05 | 0.001828 |

|          |           |          |           |                  |          |          |   |       |          |          |          |          |          |          |          |          |
|----------|-----------|----------|-----------|------------------|----------|----------|---|-------|----------|----------|----------|----------|----------|----------|----------|----------|
| ENSG0000 | mucosal h | Inflamed | FCGR3B    | protein_cc chr1  | 1.62E+08 | 1.62E+08 | - | 2964  | 927.5442 | 0.026253 | -3.37951 | 0.581338 | -5.81334 | 7.50E-08 | 1.94E-05 | 0.001971 |
| ENSG0000 | mucosal h | Inflamed | GPR97     | protein_cc chr16 | 57702099 | 57723975 | + | 3593  | 656.5012 | 0        | -2.29291 | 0.394449 | -5.81294 | 7.51E-08 | 1.94E-05 | 0.001974 |
| ENSG0000 | mucosal h | Inflamed | CHST2     | protein_cc chr3  | 1.43E+08 | 1.43E+08 | + | 3526  | 1500.232 | 0        | -1.44124 | 0.248067 | -5.8099  | 7.61E-08 | 1.94E-05 | 0.002001 |
| ENSG0000 | mucosal h | Inflamed | IL2RA     | protein_cc chr10 | 6052652  | 6104288  | - | 3176  | 535.1193 | 0        | -1.52867 | 0.263245 | -5.80703 | 7.71E-08 | 1.95E-05 | 0.002027 |
| ENSG0000 | mucosal h | Inflamed | DOC2B     | protein_cc chr17 | 5810     | 31427    | - | 1480  | 228.7924 | 0.004773 | -1.69315 | 0.291947 | -5.79951 | 7.97E-08 | 2.00E-05 | 0.002096 |
| ENSG0000 | mucosal h | Inflamed | SH3GL2    | protein_cc chr9  | 17579080 | 17797127 | + | 2869  | 10.29833 | 0.178998 | 1.183907 | 0.204262 | 5.796034 | 8.10E-08 | 2.01E-05 | 0.002129 |
| ENSG0000 | mucosal h | Inflamed | SLC45A2   | protein_cc chr5  | 33944721 | 33984835 | - | 3269  | 12.43437 | 0.329356 | 1.548406 | 0.26728  | 5.793196 | 8.20E-08 | 2.01E-05 | 0.002156 |
| ENSG0000 | mucosal h | Inflamed | SAA2      | protein_cc chr11 | 18260770 | 18270190 | - | 2227  | 255.1599 | 0.100239 | -3.32841 | 0.57494  | -5.78915 | 8.35E-08 | 2.02E-05 | 0.002195 |
| ENSG0000 | mucosal h | Inflamed | CXCR2     | protein_cc chr2  | 2.19E+08 | 2.19E+08 | + | 3231  | 690.4177 | 0.00716  | -3.12138 | 0.539241 | -5.78846 | 8.37E-08 | 2.02E-05 | 0.002201 |
| ENSG0000 | mucosal h | Inflamed | IGLV1-40  | IG_V_gene chr22  | 22764098 | 22764614 | + | 407   | 19093.81 | 0        | -2.05363 | 0.355148 | -5.78246 | 8.60E-08 | 2.04E-05 | 0.002261 |
| ENSG0000 | mucosal h | Inflamed | AP000569  | lincRNA chr21    | 35339403 | 35340874 | - | 591   | 2.159905 | 0.536993 | -0.81636 | 0.141208 | -5.78121 | 8.65E-08 | 2.04E-05 | 0.002274 |
| ENSG0000 | mucosal h | Inflamed | DCC       | protein_cc chr18 | 49866542 | 51057784 | + | 8649  | 26.00239 | 0.133652 | -1.95847 | 0.33883  | -5.78009 | 8.69E-08 | 2.04E-05 | 0.002285 |
| ENSG0000 | mucosal h | Inflamed | TREM1     | protein_cc chr6  | 41235664 | 41254457 | - | 4329  | 395.6802 | 0.047733 | -3.06701 | 0.530786 | -5.77823 | 8.76E-08 | 2.04E-05 | 0.002304 |
| ENSG0000 | mucosal h | Inflamed | TOR3A     | protein_cc chr1  | 1.79E+08 | 1.79E+08 | + | 3917  | 2074.301 | 0        | -0.61818 | 0.107029 | -5.77579 | 8.86E-08 | 2.04E-05 | 0.002329 |
| ENSG0000 | mucosal h | Inflamed | AC096579  | processed_chr2   | 89109984 | 89161075 | - | 1653  | 54.45107 | 0.009547 | -1.49394 | 0.2589   | -5.77033 | 9.08E-08 | 2.06E-05 | 0.002386 |
| ENSG0000 | mucosal h | Inflamed | OAF       | protein_cc chr11 | 1.2E+08  | 1.2E+08  | + | 3176  | 4747.659 | 0        | 0.757182 | 0.131227 | 5.770007 | 9.09E-08 | 2.06E-05 | 0.002389 |
| ENSG0000 | mucosal h | Inflamed | TRPM6     | protein_cc chr9  | 77337411 | 77503010 | - | 9287  | 1812.153 | 0.002387 | 2.349565 | 0.407995 | 5.758808 | 9.55E-08 | 2.13E-05 | 0.002511 |
| ENSG0000 | mucosal h | Inflamed | IGLC3     | IG_C_gene chr22  | 23248512 | 23248973 | + | 462   | 44799.05 | 0        | -1.8834  | 0.327099 | -5.7579  | 9.59E-08 | 2.13E-05 | 0.002521 |
| ENSG0000 | mucosal h | Inflamed | POU2AF1   | protein_cc chr11 | 1.11E+08 | 1.11E+08 | - | 7416  | 4964.644 | 0        | -1.63617 | 0.284198 | -5.75714 | 9.62E-08 | 2.13E-05 | 0.00253  |
| ENSG0000 | mucosal h | Inflamed | HAPLN3    | protein_cc chr15 | 89420519 | 89438857 | - | 3524  | 905.6348 | 0        | -1.72734 | 0.300153 | -5.75488 | 9.72E-08 | 2.13E-05 | 0.002555 |
| ENSG0000 | mucosal h | Inflamed | MMP10     | protein_cc chr11 | 1.03E+08 | 1.03E+08 | - | 1758  | 597.673  | 0.009547 | -2.91232 | 0.506214 | -5.75314 | 9.80E-08 | 2.13E-05 | 0.002575 |
| ENSG0000 | mucosal h | Inflamed | IGLV1-47  | IG_V_gene chr22  | 22712087 | 22712608 | + | 407   | 7747.325 | 0        | -2.18865 | 0.380939 | -5.7454  | 1.01E-07 | 2.18E-05 | 0.002665 |
| ENSG0000 | mucosal h | Inflamed | KIAA1984  | protein_cc chr9  | 1.4E+08  | 1.4E+08  | + | 2964  | 55.90931 | 0        | 1.152928 | 0.201    | 5.735965 | 1.06E-07 | 2.26E-05 | 0.002779 |
| ENSG0000 | mucosal h | Inflamed | FPR2      | protein_cc chr19 | 52255279 | 52273779 | + | 3700  | 383.5131 | 0.0358   | -2.99362 | 0.522042 | -5.73445 | 1.06E-07 | 2.26E-05 | 0.002797 |
| ENSG0000 | mucosal h | Inflamed | IGHG2     | IG_C_gene chr14  | 1.06E+08 | 1.06E+08 | - | 1132  | 123207.2 | 0        | -2.66073 | 0.464214 | -5.73169 | 1.08E-07 | 2.26E-05 | 0.002832 |
| ENSG0000 | mucosal h | Inflamed | BFSP2     | protein_cc chr3  | 1.33E+08 | 1.33E+08 | + | 2070  | 18.94988 | 0.059666 | -1.56904 | 0.273802 | -5.73055 | 1.08E-07 | 2.26E-05 | 0.002846 |
| ENSG0000 | mucosal h | Inflamed | TIMP1     | protein_cc chrX  | 47441712 | 47446188 | + | 1790  | 9957.695 | 0        | -1.35421 | 0.23676  | -5.71975 | 1.14E-07 | 2.35E-05 | 0.002985 |
| ENSG0000 | mucosal h | Inflamed | IGKV1-33  | IG_V_gene chr2   | 89567758 | 89568263 | - | 382   | 371.1146 | 0.002387 | -2.03551 | 0.356621 | -5.70777 | 1.20E-07 | 2.46E-05 | 0.003148 |
| ENSG0000 | mucosal h | Inflamed | FCRL5     | protein_cc chr1  | 1.57E+08 | 1.58E+08 | - | 12440 | 2319.776 | 0        | -1.81969 | 0.319072 | -5.70306 | 1.22E-07 | 2.49E-05 | 0.003214 |
| ENSG0000 | mucosal h | Inflamed | AC093818  | antisense chr2   | 1.73E+08 | 1.73E+08 | - | 2447  | 130.2578 | 0        | -1.26125 | 0.221444 | -5.69557 | 1.26E-07 | 2.55E-05 | 0.003322 |
| ENSG0000 | mucosal h | Inflamed | SLC38A5   | protein_cc chrX  | 48316920 | 48328644 | - | 4016  | 1283.504 | 0        | -0.78214 | 0.137349 | -5.69452 | 1.27E-07 | 2.55E-05 | 0.003337 |
| ENSG0000 | mucosal h | Inflamed | MMP3      | protein_cc chr11 | 1.03E+08 | 1.03E+08 | - | 2048  | 6591.585 | 0        | -3.56571 | 0.62657  | -5.69084 | 1.29E-07 | 2.57E-05 | 0.003392 |
| ENSG0000 | mucosal h | Inflamed | RP11-216L | processed_chr9   | 1.4E+08  | 1.4E+08  | + | 4335  | 114.0931 | 0        | 1.340583 | 0.235885 | 5.683199 | 1.33E-07 | 2.62E-05 | 0.003508 |
| ENSG0000 | mucosal h | Inflamed | NT5DC2    | protein_cc chr3  | 52558386 | 52569070 | - | 4734  | 1943.831 | 0        | -0.87614 | 0.154177 | -5.68272 | 1.34E-07 | 2.62E-05 | 0.003515 |
| ENSG0000 | mucosal h | Inflamed | AQP9      | protein_cc chr15 | 58430368 | 58478110 | + | 3235  | 823.1742 | 0.073986 | -3.50454 | 0.617012 | -5.67985 | 1.35E-07 | 2.64E-05 | 0.00356  |
| ENSG0000 | mucosal h | Inflamed | IFITM3    | protein_cc chr11 | 319669   | 327537   | - | 1348  | 11468.4  | 0        | -1.0823  | 0.191073 | -5.66431 | 1.45E-07 | 2.79E-05 | 0.003813 |
| ENSG0000 | mucosal h | Inflamed | CHI3L2    | protein_cc chr1  | 1.12E+08 | 1.12E+08 | + | 3295  | 372.3294 | 0        | -2.42387 | 0.427984 | -5.66347 | 1.46E-07 | 2.79E-05 | 0.003827 |
| ENSG0000 | mucosal h | Inflamed | CXCL3     | protein_cc chr4  | 74902306 | 74904524 | - | 2219  | 1581.253 | 0        | -1.93189 | 0.341322 | -5.66002 | 1.48E-07 | 2.82E-05 | 0.003885 |
| ENSG0000 | mucosal h | Inflamed | CCDC175   | protein_cc chr14 | 59971257 | 60043549 | - | 3245  | 5.054893 | 0.329356 | 1.323573 | 0.234287 | 5.649379 | 1.55E-07 | 2.93E-05 | 0.004071 |
| ENSG0000 | mucosal h | Inflamed | VAMP5     | protein_cc chr2  | 85811531 | 85820535 | + | 819   | 458.8258 | 0        | -0.94879 | 0.168007 | -5.64732 | 1.56E-07 | 2.93E-05 | 0.004108 |

|          |           |          |                    |            |          |          |          |     |          |          |          |          |          |          |          |          |          |
|----------|-----------|----------|--------------------|------------|----------|----------|----------|-----|----------|----------|----------|----------|----------|----------|----------|----------|----------|
| ENSG0000 | mucosal h | Inflamed | CTC-5580:antisense | chr5       | 1.68E+08 | 1.68E+08 | +        | 810 | 6.109785 | 0.295943 | 1.117418 | 0.198051 | 5.642061 | 1.60E-07 | 2.98E-05 | 0.004204 |          |
| ENSG0000 | mucosal h | Inflamed | CD38               | protein_cc | chr4     | 15779898 | 15854853 | +   | 6855     | 1144.84  | 0        | -1.55139 | 0.275324 | -5.6348  | 1.65E-07 | 3.06E-05 | 0.004341 |
| ENSG0000 | mucosal h | Inflamed | IGHV3-11           | IG_V_gene  | chr14    | 1.07E+08 | 1.07E+08 | -   | 471      | 7462.795 | 0        | -2.08851 | 0.370985 | -5.62964 | 1.69E-07 | 3.11E-05 | 0.00444  |
| ENSG0000 | mucosal h | Inflamed | RP11-16E1          | lincRNA    | chr15    | 31514202 | 31523041 | -   | 1563     | 284.642  | 0        | -1.21419 | 0.21595  | -5.62258 | 1.74E-07 | 3.17E-05 | 0.00458  |
| ENSG0000 | mucosal h | Inflamed | TNFRSF9            | protein_cc | chr1     | 7979907  | 8000926  | -   | 2284     | 100.7804 | 0.009547 | -1.51308 | 0.269159 | -5.62152 | 1.75E-07 | 3.17E-05 | 0.004601 |
| ENSG0000 | mucosal h | Inflamed | CDKN2B-A           | antisense  | chr9     | 21994777 | 22121096 | +   | 4225     | 334.4702 | 0.002387 | 2.018289 | 0.359122 | 5.620064 | 1.76E-07 | 3.17E-05 | 0.004631 |
| ENSG0000 | mucosal h | Inflamed | TP73               | protein_cc | chr1     | 3569084  | 3652765  | +   | 6763     | 140.6921 | 0.002387 | -1.39158 | 0.248165 | -5.60747 | 1.86E-07 | 3.33E-05 | 0.004893 |
| ENSG0000 | mucosal h | Inflamed | PDPN               | protein_cc | chr1     | 13909960 | 13944452 | +   | 3707     | 1462.289 | 0        | -1.62179 | 0.289312 | -5.60568 | 1.88E-07 | 3.33E-05 | 0.004932 |
| ENSG0000 | mucosal h | Inflamed | GM2A               | protein_cc | chr5     | 1.51E+08 | 1.51E+08 | +   | 4479     | 3480.026 | 0        | -0.61689 | 0.110122 | -5.60183 | 1.91E-07 | 3.34E-05 | 0.005016 |
| ENSG0000 | mucosal h | Inflamed | AC073133           | lincRNA    | chr7     | 1.56E+08 | 1.56E+08 | -   | 2698     | 21.05967 | 0.124105 | 1.6418   | 0.293152 | 5.60051  | 1.92E-07 | 3.34E-05 | 0.005045 |
| ENSG0000 | mucosal h | Inflamed | CAPN13             | protein_cc | chr2     | 30945637 | 31043408 | -   | 5203     | 624.2768 | 0.004773 | 2.322604 | 0.414714 | 5.60049  | 1.92E-07 | 3.34E-05 | 0.005045 |
| ENSG0000 | mucosal h | Inflamed | PROK2              | protein_cc | chr3     | 71820807 | 71834357 | -   | 1612     | 324.9403 | 0.116945 | -3.47437 | 0.620623 | -5.5982  | 1.94E-07 | 3.35E-05 | 0.005096 |
| ENSG0000 | mucosal h | Inflamed | ACSF2              | protein_cc | chr17    | 48503519 | 48552206 | +   | 5797     | 1814.752 | 0        | 1.093068 | 0.195399 | 5.594019 | 1.97E-07 | 3.39E-05 | 0.00519  |
| ENSG0000 | mucosal h | Inflamed | KLK6               | protein_cc | chr19    | 51461887 | 51472929 | -   | 1976     | 292.3007 | 0.331742 | -3.76823 | 0.673974 | -5.59106 | 2.00E-07 | 3.41E-05 | 0.005258 |
| ENSG0000 | mucosal h | Inflamed | AC110619           | protein_cc | chr2     | 2.41E+08 | 2.41E+08 | -   | 2347     | 25.74702 | 0.088305 | 1.754462 | 0.313946 | 5.588423 | 2.02E-07 | 3.43E-05 | 0.005319 |
| ENSG0000 | mucosal h | Inflamed | IGKC               | IG_C_gene  | chr2     | 89156674 | 89157196 | -   | 523      | 644.8998 | 0        | -2.03024 | 0.363516 | -5.58502 | 2.05E-07 | 3.46E-05 | 0.005399 |
| ENSG0000 | mucosal h | Inflamed | C19orf59           | protein_cc | chr19    | 7741514  | 7744712  | +   | 1906     | 68.80191 | 0.221957 | -2.71694 | 0.486847 | -5.58068 | 2.09E-07 | 3.50E-05 | 0.005502 |
| ENSG0000 | mucosal h | Inflamed | WNT2               | protein_cc | chr7     | 1.17E+08 | 1.17E+08 | -   | 3005     | 114.8115 | 0.312649 | -2.96117 | 0.530823 | -5.57845 | 2.11E-07 | 3.52E-05 | 0.005556 |
| ENSG0000 | mucosal h | Inflamed | C17orf96           | protein_cc | chr17    | 36827961 | 36831187 | -   | 3227     | 189.3771 | 0.002387 | -1.32999 | 0.238544 | -5.57544 | 2.14E-07 | 3.52E-05 | 0.00563  |
| ENSG0000 | mucosal h | Inflamed | ALG1L13P           | pseudoger  | chr8     | 8093525  | 8102189  | -   | 1447     | 22.48687 | 0.054893 | -1.54706 | 0.27752  | -5.57459 | 2.15E-07 | 3.52E-05 | 0.005651 |
| ENSG0000 | mucosal h | Inflamed | IGLL5              | protein_cc | chr22    | 23229960 | 23238287 | +   | 1335     | 1057.413 | 0        | -1.65606 | 0.297143 | -5.57326 | 2.16E-07 | 3.52E-05 | 0.005684 |
| ENSG0000 | mucosal h | Inflamed | IGKV1-9            | IG_V_gene  | chr2     | 89309479 | 89310012 | -   | 409      | 10470.12 | 0        | -1.99734 | 0.358566 | -5.57035 | 2.19E-07 | 3.52E-05 | 0.005756 |
| ENSG0000 | mucosal h | Inflamed | LILRA3             | protein_cc | chr19    | 54799854 | 54809952 | -   | 1924     | 317.2888 | 0.023866 | -2.33918 | 0.419959 | -5.57002 | 2.19E-07 | 3.52E-05 | 0.005765 |
| ENSG0000 | mucosal h | Inflamed | C21orf88           | protein_cc | chr21    | 40969074 | 40984748 | -   | 2516     | 230.5346 | 0.031026 | 2.996576 | 0.538037 | 5.569458 | 2.20E-07 | 3.52E-05 | 0.005779 |
| ENSG0000 | mucosal h | Inflamed | CNNM2              | protein_cc | chr10    | 1.05E+08 | 1.05E+08 | +   | 16324    | 1473.356 | 0        | 0.848278 | 0.152359 | 5.567614 | 2.22E-07 | 3.53E-05 | 0.005826 |
| ENSG0000 | mucosal h | Inflamed | CCNJL              | protein_cc | chr5     | 1.6E+08  | 1.6E+08  | -   | 4731     | 879.5776 | 0        | 1.003406 | 0.180335 | 5.564112 | 2.25E-07 | 3.56E-05 | 0.005915 |
| ENSG0000 | mucosal h | Inflamed | HCAR3              | protein_cc | chr12    | 1.23E+08 | 1.23E+08 | -   | 2137     | 822.642  | 0.0358   | -3.3741  | 0.606735 | -5.56107 | 2.28E-07 | 3.59E-05 | 0.005994 |
| ENSG0000 | mucosal h | Inflamed | PTP4A3             | protein_cc | chr8     | 1.42E+08 | 1.42E+08 | +   | 1943     | 1338.914 | 0        | -1.78877 | 0.321993 | -5.55532 | 2.34E-07 | 3.66E-05 | 0.006147 |
| ENSG0000 | mucosal h | Inflamed | RP11-4344          | antisense  | chr2     | 1.44E+08 | 1.44E+08 | -   | 884      | 3.668258 | 0.477327 | 1.106886 | 0.199361 | 5.552176 | 2.37E-07 | 3.69E-05 | 0.006232 |
| ENSG0000 | mucosal h | Inflamed | FOXD2-AS           | antisense  | chr1     | 47897805 | 47900313 | -   | 2509     | 512.9499 | 0        | 1.055912 | 0.190274 | 5.549427 | 2.40E-07 | 3.71E-05 | 0.006307 |
| ENSG0000 | mucosal h | Inflamed | LINC00152          | lincRNA    | chr2     | 87754887 | 87906324 | +   | 3125     | 244.3461 | 0        | -1.42893 | 0.257685 | -5.54527 | 2.44E-07 | 3.76E-05 | 0.006422 |
| ENSG0000 | mucosal h | Inflamed | IGHV3-7            | IG_V_gene  | chr14    | 1.07E+08 | 1.07E+08 | -   | 430      | 18426.45 | 0        | -1.86143 | 0.335989 | -5.54015 | 2.50E-07 | 3.82E-05 | 0.006567 |
| ENSG0000 | mucosal h | Inflamed | CCR3               | protein_cc | chr3     | 46205096 | 46308197 | +   | 3647     | 82.42005 | 0.00716  | -1.77828 | 0.321118 | -5.53777 | 2.52E-07 | 3.84E-05 | 0.006635 |
| ENSG0000 | mucosal h | Inflamed | PLA1A              | protein_cc | chr3     | 1.19E+08 | 1.19E+08 | +   | 2202     | 133.3294 | 0.004773 | -1.67371 | 0.302546 | -5.53209 | 2.59E-07 | 3.91E-05 | 0.006802 |
| ENSG0000 | mucosal h | Inflamed | IL1A               | protein_cc | chr2     | 1.14E+08 | 1.14E+08 | -   | 2124     | 100.8091 | 0.085919 | -2.20673 | 0.399062 | -5.52979 | 2.61E-07 | 3.93E-05 | 0.00687  |
| ENSG0000 | mucosal h | Inflamed | NMUR2              | protein_cc | chr5     | 1.52E+08 | 1.52E+08 | -   | 2345     | 125.6993 | 0.257757 | -2.8189  | 0.510392 | -5.52302 | 2.69E-07 | 4.00E-05 | 0.007075 |
| ENSG0000 | mucosal h | Inflamed | ACP5               | protein_cc | chr19    | 11685475 | 11689823 | -   | 2814     | 3924.811 | 0        | -0.7932  | 0.143626 | -5.52268 | 2.70E-07 | 4.00E-05 | 0.007086 |
| ENSG0000 | mucosal h | Inflamed | ORAI2              | protein_cc | chr7     | 1.02E+08 | 1.02E+08 | +   | 11098    | 2315.403 | 0        | -1.09288 | 0.198027 | -5.51882 | 2.74E-07 | 4.05E-05 | 0.007206 |
| ENSG0000 | mucosal h | Inflamed | CEACAM4            | protein_cc | chr19    | 42125344 | 42133442 | -   | 1364     | 61.88067 | 0.02148  | -1.67161 | 0.30305  | -5.51596 | 2.78E-07 | 4.05E-05 | 0.007296 |
| ENSG0000 | mucosal h | Inflamed | RGCC               | protein_cc | chr13    | 42031695 | 42045018 | +   | 1032     | 507.1337 | 0        | -1.16071 | 0.210428 | -5.51595 | 2.78E-07 | 4.05E-05 | 0.007296 |



|          |           |          |           |                  |          |          |   |       |          |          |          |          |          |          |          |          |
|----------|-----------|----------|-----------|------------------|----------|----------|---|-------|----------|----------|----------|----------|----------|----------|----------|----------|
| ENSG0000 | mucosal h | Inflamed | FCGR3A    | protein_cc chr1  | 1.62E+08 | 1.62E+08 | - | 2977  | 995.9308 | 0        | -1.58515 | 0.287573 | -5.51215 | 2.82E-07 | 4.09E-05 | 0.007418 |
| ENSG0000 | mucosal h | Inflamed | SLC26A2   | protein_cc chr5  | 1.49E+08 | 1.49E+08 | + | 8606  | 17142.27 | 0        | 2.471301 | 0.448394 | 5.511451 | 2.83E-07 | 4.09E-05 | 0.00744  |
| ENSG0000 | mucosal h | Inflamed | DHRS7C    | protein_cc chr17 | 9674751  | 9694614  | - | 1006  | 14.76611 | 0.140811 | 1.739345 | 0.315685 | 5.509742 | 2.85E-07 | 4.10E-05 | 0.007496 |
| ENSG0000 | mucosal h | Inflamed | IGHV4-59  | IG_V_gene chr14  | 1.07E+08 | 1.07E+08 | - | 1432  | 15020.42 | 0        | -1.70981 | 0.310734 | -5.50247 | 2.94E-07 | 4.20E-05 | 0.007736 |
| ENSG0000 | mucosal h | Inflamed | GS1-18A1  | antisense chr7   | 54624663 | 54639419 | + | 3031  | 3.983294 | 0.455847 | 1.140082 | 0.207334 | 5.498779 | 2.99E-07 | 4.23E-05 | 0.007861 |
| ENSG0000 | mucosal h | Inflamed | RNF157    | protein_cc chr17 | 74138534 | 74236454 | - | 7802  | 1220.036 | 0        | 0.954616 | 0.173627 | 5.498076 | 3.00E-07 | 4.23E-05 | 0.007885 |
| ENSG0000 | mucosal h | Inflamed | VSIG10    | protein_cc chr12 | 1.19E+08 | 1.19E+08 | - | 7060  | 2561.585 | 0        | 1.044308 | 0.189958 | 5.497578 | 3.01E-07 | 4.23E-05 | 0.007903 |
| ENSG0000 | mucosal h | Inflamed | IMPA2     | protein_cc chr18 | 11981024 | 12030876 | + | 3819  | 2241.069 | 0        | 0.656902 | 0.119557 | 5.494461 | 3.05E-07 | 4.26E-05 | 0.00801  |
| ENSG0000 | mucosal h | Inflamed | IGHV3-21  | IG_V_gene chr14  | 1.07E+08 | 1.07E+08 | - | 430   | 16243.19 | 0        | -1.93174 | 0.351649 | -5.49337 | 3.06E-07 | 4.26E-05 | 0.008048 |
| ENSG0000 | mucosal h | Inflamed | AC073133  | lincRNA chr7     | 1.56E+08 | 1.56E+08 | - | 432   | 6.539379 | 0.317422 | 1.170793 | 0.213385 | 5.48676  | 3.15E-07 | 4.35E-05 | 0.008282 |
| ENSG0000 | mucosal h | Inflamed | IGLV2-14  | IG_V_gene chr22  | 23101189 | 23101707 | + | 402   | 37629.5  | 0        | -1.87342 | 0.341488 | -5.48605 | 3.16E-07 | 4.35E-05 | 0.008308 |
| ENSG0000 | mucosal h | Inflamed | IGKV3-15  | IG_V_gene chr2   | 89384673 | 89385283 | - | 442   | 10091.73 | 0        | -2.08771 | 0.381162 | -5.47721 | 3.28E-07 | 4.50E-05 | 0.008632 |
| ENSG0000 | mucosal h | Inflamed | RP11-2751 | lincRNA chr15    | 38964048 | 38981392 | + | 815   | 7.575179 | 0.300716 | -1.48097 | 0.270561 | -5.47368 | 3.33E-07 | 4.54E-05 | 0.008765 |
| ENSG0000 | mucosal h | Inflamed | GPR114    | protein_cc chr16 | 57576333 | 57625593 | + | 5852  | 699.3365 | 0        | -1.05272 | 0.192597 | -5.46592 | 3.45E-07 | 4.67E-05 | 0.009065 |
| ENSG0000 | mucosal h | Inflamed | APOL1     | protein_cc chr22 | 36649056 | 36663576 | + | 3519  | 7445.377 | 0        | -1.31287 | 0.240229 | -5.46508 | 3.46E-07 | 4.67E-05 | 0.009098 |
| ENSG0000 | mucosal h | Inflamed | IL8       | protein_cc chr4  | 74606223 | 74609433 | + | 2274  | 1983.704 | 0.011933 | -3.31462 | 0.606801 | -5.46245 | 3.50E-07 | 4.69E-05 | 0.009202 |
| ENSG0000 | mucosal h | Inflamed | PMM1      | protein_cc chr22 | 41972898 | 41985894 | - | 5082  | 1107.749 | 0        | 0.610193 | 0.111802 | 5.457822 | 3.57E-07 | 4.77E-05 | 0.009388 |
| ENSG0000 | mucosal h | Inflamed | AC096579  | processed_chr2   | 89130700 | 89165653 | - | 1424  | 751.389  | 0        | -1.61897 | 0.296951 | -5.45196 | 3.66E-07 | 4.86E-05 | 0.009629 |
| ENSG0000 | mucosal h | Inflamed | RP11-330  | lincRNA chr2     | 2.2E+08  | 2.2E+08  | - | 456   | 68.11217 | 0        | 1.034022 | 0.189706 | 5.450656 | 3.68E-07 | 4.87E-05 | 0.009684 |
| ENSG0000 | mucosal h | Inflamed | RP11-109C | antisense chr17  | 12663457 | 12693559 | - | 3679  | 14.82816 | 0.408115 | 1.453668 | 0.2668   | 5.44853  | 3.72E-07 | 4.88E-05 | 0.009773 |
| ENSG0000 | mucosal h | Inflamed | RP11-386C | antisense chr12  | 49392150 | 49412988 | + | 2208  | 13.01432 | 0.02864  | -1.03522 | 0.190025 | -5.44782 | 3.73E-07 | 4.88E-05 | 0.009803 |
| ENSG0000 | mucosal h | Inflamed | IGKV1-12  | IG_V_gene chr2   | 89339721 | 89340242 | - | 398   | 5915.943 | 0        | -1.96713 | 0.361338 | -5.44401 | 3.79E-07 | 4.92E-05 | 0.009966 |
| ENSG0000 | mucosal h | Inflamed | LILRB4    | protein_cc chr19 | 55155340 | 55181810 | + | 6475  | 1117.642 | 0        | -1.32969 | 0.244323 | -5.44235 | 3.82E-07 | 4.92E-05 | 0.010037 |
| ENSG0000 | mucosal h | Inflamed | ENDOV     | protein_cc chr17 | 78388965 | 78411886 | + | 7253  | 437.8401 | 0        | 0.503009 | 0.092475 | 5.439423 | 3.87E-07 | 4.92E-05 | 0.010165 |
| ENSG0000 | mucosal h | Inflamed | IL21R     | protein_cc chr16 | 27413483 | 27462115 | + | 4219  | 662.5274 | 0        | -1.53499 | 0.282229 | -5.43883 | 3.88E-07 | 4.92E-05 | 0.010191 |
| ENSG0000 | mucosal h | Inflamed | PRDX4     | protein_cc chrX  | 23682379 | 23704516 | + | 1904  | 2190.401 | 0        | -0.8628  | 0.158653 | -5.43829 | 3.89E-07 | 4.92E-05 | 0.010215 |
| ENSG0000 | mucosal h | Inflamed | TXNDC11   | protein_cc chr16 | 11772936 | 11836734 | - | 4292  | 4994.864 | 0        | -0.57641 | 0.105995 | -5.43812 | 3.89E-07 | 4.92E-05 | 0.010223 |
| ENSG0000 | mucosal h | Inflamed | ZNF385C   | protein_cc chr17 | 40177594 | 40217383 | - | 5115  | 27.1957  | 0.011933 | 1.005759 | 0.18496  | 5.437707 | 3.90E-07 | 4.92E-05 | 0.010241 |
| ENSG0000 | mucosal h | Inflamed | KLHDC7B   | protein_cc chr22 | 50986462 | 50989451 | + | 2990  | 124.8854 | 0.002387 | -1.29853 | 0.238918 | -5.43504 | 3.94E-07 | 4.96E-05 | 0.01036  |
| ENSG0000 | mucosal h | Inflamed | ARHGAP4   | protein_cc chr17 | 12692856 | 12894960 | + | 9281  | 2439.105 | 0        | 1.130173 | 0.208021 | 5.432974 | 3.98E-07 | 4.98E-05 | 0.010452 |
| ENSG0000 | mucosal h | Inflamed | UNC5D     | protein_cc chr8  | 35092975 | 35654068 | + | 10816 | 21.20048 | 0.136038 | 1.686059 | 0.310421 | 5.431523 | 4.00E-07 | 4.98E-05 | 0.010518 |
| ENSG0000 | mucosal h | Inflamed | IGLV2-11  | IG_V_gene chr22  | 23134980 | 23135496 | + | 400   | 12821.25 | 0        | -1.83514 | 0.33808  | -5.42812 | 4.06E-07 | 5.03E-05 | 0.010673 |
| ENSG0000 | mucosal h | Inflamed | HLA-DMA   | protein_cc chr6  | 32916390 | 32936871 | - | 2534  | 3383.432 | 0        | -0.89328 | 0.164721 | -5.423   | 4.15E-07 | 5.12E-05 | 0.010912 |
| ENSG0000 | mucosal h | Inflamed | RP11-376  | pseudoger chr1   | 84810361 | 84815622 | + | 905   | 1.945107 | 0.546539 | 0.796205 | 0.14685  | 5.421887 | 4.17E-07 | 5.12E-05 | 0.010964 |
| ENSG0000 | mucosal h | Inflamed | PTAFR     | protein_cc chr1  | 28473677 | 28520447 | - | 4706  | 1972.103 | 0        | -1.17707 | 0.217235 | -5.41844 | 4.23E-07 | 5.18E-05 | 0.011129 |
| ENSG0000 | mucosal h | Inflamed | IGLV1-51  | IG_V_gene chr22  | 22676828 | 22677336 | + | 400   | 11144.61 | 0        | -1.96855 | 0.363691 | -5.4127  | 4.34E-07 | 5.28E-05 | 0.011407 |
| ENSG0000 | mucosal h | Inflamed | IFI30     | protein_cc chr19 | 18283972 | 18288927 | + | 2481  | 819.1885 | 0        | -1.07487 | 0.198787 | -5.40713 | 4.44E-07 | 5.38E-05 | 0.011684 |
| ENSG0000 | mucosal h | Inflamed | WFIKKN1   | protein_cc chr16 | 679239   | 684116   | + | 4878  | 79.0358  | 0.00716  | 1.166022 | 0.215942 | 5.399695 | 4.59E-07 | 5.53E-05 | 0.012064 |
| ENSG0000 | mucosal h | Inflamed | IGHV3-23  | IG_V_gene chr14  | 1.07E+08 | 1.07E+08 | - | 430   | 35873.8  | 0        | -1.86328 | 0.34528  | -5.39643 | 4.65E-07 | 5.58E-05 | 0.012235 |
| ENSG0000 | mucosal h | Inflamed | TAP1      | protein_cc chr6  | 32812986 | 32821755 | - | 4742  | 11757.22 | 0        | -0.69133 | 0.128139 | -5.39513 | 4.68E-07 | 5.58E-05 | 0.012303 |

|          |           |          |                    |            |          |          |          |      |          |          |          |          |          |          |          |          |          |
|----------|-----------|----------|--------------------|------------|----------|----------|----------|------|----------|----------|----------|----------|----------|----------|----------|----------|----------|
| ENSG0000 | mucosal h | Inflamed | GNG12-AS antisense | chr1       | 68297986 | 68668670 | +        | 3465 | 11.41527 | 0.081146 | 1.063234 | 0.197091 | 5.39464  | 4.69E-07 | 5.58E-05 | 0.01233  |          |
| ENSG0000 | mucosal h | Inflamed | RAC2               | protein_cc | chr22    | 37621301 | 37640488 | -    | 2532     | 2379.697 | 0        | -1.07775 | 0.199866 | -5.39236 | 4.74E-07 | 5.58E-05 | 0.012451 |
| ENSG0000 | mucosal h | Inflamed | IGKV3D-2C          | IG_V_gene  | chr2     | 90077680 | 90078311 | +    | 445      | 1939.644 | 0.002387 | -1.96837 | 0.365052 | -5.39202 | 4.74E-07 | 5.58E-05 | 0.01247  |
| ENSG0000 | mucosal h | Inflamed | GLRA2              | protein_cc | chrX     | 14547420 | 14749934 | +    | 3713     | 33.30549 | 0.188544 | 2.325543 | 0.431331 | 5.391556 | 4.75E-07 | 5.58E-05 | 0.012494 |
| ENSG0000 | mucosal h | Inflamed | OSM                | protein_cc | chr22    | 30658818 | 30662829 | -    | 2114     | 887.6181 | 0.011933 | -2.89175 | 0.536538 | -5.38965 | 4.79E-07 | 5.58E-05 | 0.012597 |
| ENSG0000 | mucosal h | Inflamed | REG1A              | protein_cc | chr2     | 79347488 | 79350545 | +    | 1725     | 18254.48 | 0.00716  | -4.2521  | 0.788993 | -5.38927 | 4.80E-07 | 5.58E-05 | 0.012618 |
| ENSG0000 | mucosal h | Inflamed | IL17C              | protein_cc | chr16    | 88704999 | 88706881 | +    | 1379     | 12.46539 | 0.272076 | -1.6194  | 0.300552 | -5.38808 | 4.82E-07 | 5.59E-05 | 0.012682 |
| ENSG0000 | mucosal h | Inflamed | IGHV3-73           | IG_V_gene  | chr14    | 1.07E+08 | 1.07E+08 | -    | 437      | 2819.148 | 0.002387 | -1.90861 | 0.355031 | -5.37591 | 5.08E-07 | 5.86E-05 | 0.013363 |
| ENSG0000 | mucosal h | Inflamed | LINC0094C          | lincRNA    | chr12    | 2038368  | 2045740  | -    | 2350     | 37.62768 | 0.119332 | 1.807569 | 0.336476 | 5.372058 | 5.17E-07 | 5.93E-05 | 0.013586 |
| ENSG0000 | mucosal h | Inflamed | IGLV3-1            | IG_V_gene  | chr22    | 23222886 | 23223576 | +    | 398      | 11455.05 | 0        | -2.01446 | 0.375649 | -5.3626  | 5.38E-07 | 6.12E-05 | 0.014149 |
| ENSG0000 | mucosal h | Inflamed | IL5RA              | protein_cc | chr3     | 3111233  | 3168297  | -    | 3377     | 40.06205 | 0        | -1.45104 | 0.270611 | -5.36211 | 5.39E-07 | 6.12E-05 | 0.014179 |
| ENSG0000 | mucosal h | Inflamed | AC104699           | antisense  | chr2     | 25643986 | 25650512 | +    | 414      | 88.66348 | 0.002387 | -1.50534 | 0.280847 | -5.36001 | 5.44E-07 | 6.12E-05 | 0.014307 |
| ENSG0000 | mucosal h | Inflamed | SEC13              | protein_cc | chr3     | 10334815 | 10362862 | -    | 5446     | 4716.893 | 0        | -0.34676 | 0.064695 | -5.35989 | 5.44E-07 | 6.12E-05 | 0.014314 |
| ENSG0000 | mucosal h | Inflamed | IFITM2             | protein_cc | chr11    | 307631   | 315272   | +    | 1307     | 4973.387 | 0        | -1.38957 | 0.259256 | -5.35985 | 5.45E-07 | 6.12E-05 | 0.014317 |
| ENSG0000 | mucosal h | Inflamed | IGHV1-46           | IG_V_gene  | chr14    | 1.07E+08 | 1.07E+08 | -    | 655      | 4421.845 | 0        | -1.92429 | 0.359124 | -5.35828 | 5.48E-07 | 6.13E-05 | 0.014413 |
| ENSG0000 | mucosal h | Inflamed | FCGR1A             | protein_cc | chr1     | 1.5E+08  | 1.5E+08  | +    | 2998     | 118.0024 | 0.002387 | -1.52675 | 0.285039 | -5.35628 | 5.53E-07 | 6.14E-05 | 0.014537 |
| ENSG0000 | mucosal h | Inflamed | PLEKHN1            | protein_cc | chr1     | 901877   | 911245   | +    | 2833     | 139.3986 | 0.00716  | -1.34312 | 0.250766 | -5.35605 | 5.53E-07 | 6.14E-05 | 0.014552 |
| ENSG0000 | mucosal h | Inflamed | RP11-536C          | lincRNA    | chr9     | 13406379 | 13433052 | -    | 2576     | 43.92363 | 0.081146 | -1.65814 | 0.309834 | -5.35173 | 5.64E-07 | 6.23E-05 | 0.014824 |
| ENSG0000 | mucosal h | Inflamed | GPX7               | protein_cc | chr1     | 53068044 | 53074723 | +    | 1691     | 214.8568 | 0        | -1.09675 | 0.204992 | -5.35024 | 5.67E-07 | 6.23E-05 | 0.014919 |
| ENSG0000 | mucosal h | Inflamed | CSF3               | protein_cc | chr17    | 38171614 | 38174066 | +    | 2220     | 562.5227 | 0.124105 | -3.63068 | 0.678655 | -5.34981 | 5.69E-07 | 6.23E-05 | 0.014946 |
| ENSG0000 | mucosal h | Inflamed | IGKV2D-3C          | IG_V_gene  | chr2     | 89975669 | 89976489 | +    | 395      | 200.6587 | 0        | -1.56064 | 0.291832 | -5.34775 | 5.74E-07 | 6.26E-05 | 0.015078 |
| ENSG0000 | mucosal h | Inflamed | IGKV1-27           | IG_V_gene  | chr2     | 89512908 | 89513413 | -    | 382      | 3866.976 | 0        | -1.87611 | 0.351089 | -5.3437  | 5.84E-07 | 6.34E-05 | 0.015342 |
| ENSG0000 | mucosal h | Inflamed | PDE6A              | protein_cc | chr5     | 1.49E+08 | 1.49E+08 | -    | 7414     | 165.7232 | 0.083532 | 2.280502 | 0.42686  | 5.342503 | 5.87E-07 | 6.35E-05 | 0.015421 |
| ENSG0000 | mucosal h | Inflamed | CALN1              | protein_cc | chr7     | 71244476 | 71912136 | -    | 10029    | 4.494033 | 0.587112 | 1.552967 | 0.29079  | 5.340516 | 5.92E-07 | 6.37E-05 | 0.015553 |
| ENSG0000 | mucosal h | Inflamed | LY96               | protein_cc | chr8     | 74903587 | 74941322 | +    | 607      | 156.7828 | 0        | -1.40252 | 0.262761 | -5.33762 | 5.99E-07 | 6.43E-05 | 0.015747 |
| ENSG0000 | mucosal h | Inflamed | IGKV3-7            | IG_V_gene  | chr2     | 89277987 | 89278600 | -    | 445      | 34.50597 | 0.047733 | -1.71353 | 0.321093 | -5.33655 | 6.02E-07 | 6.43E-05 | 0.015819 |
| ENSG0000 | mucosal h | Inflamed | MEI1               | protein_cc | chr22    | 42095503 | 42195460 | +    | 5412     | 619.0644 | 0        | -1.35818 | 0.254642 | -5.33368 | 6.09E-07 | 6.48E-05 | 0.016014 |
| ENSG0000 | mucosal h | Inflamed | RNASE2             | protein_cc | chr14    | 21423611 | 21424595 | +    | 755      | 21.95704 | 0.069212 | -1.51737 | 0.284522 | -5.33303 | 6.11E-07 | 6.48E-05 | 0.016059 |
| ENSG0000 | mucosal h | Inflamed | FAM167B            | protein_cc | chr1     | 32712834 | 32714457 | +    | 936      | 193.5322 | 0        | -0.98817 | 0.185459 | -5.32824 | 6.23E-07 | 6.56E-05 | 0.016392 |
| ENSG0000 | mucosal h | Inflamed | RAMP3              | protein_cc | chr7     | 45197390 | 45225901 | +    | 1427     | 755.6158 | 0        | -1.30862 | 0.245613 | -5.32797 | 6.24E-07 | 6.56E-05 | 0.01641  |
| ENSG0000 | mucosal h | Inflamed | CPA6               | protein_cc | chr8     | 68334360 | 68658620 | -    | 2435     | 44.17422 | 0.0358   | 1.733683 | 0.325738 | 5.322327 | 6.39E-07 | 6.70E-05 | 0.016811 |
| ENSG0000 | mucosal h | Inflamed | IGLV3-21           | IG_V_gene  | chr22    | 23054174 | 23055688 | +    | 602      | 10603.73 | 0        | -2.02892 | 0.381365 | -5.32014 | 6.45E-07 | 6.71E-05 | 0.016969 |
| ENSG0000 | mucosal h | Inflamed | CD55               | protein_cc | chr1     | 2.07E+08 | 2.08E+08 | +    | 4477     | 7389.764 | 0        | -1.38099 | 0.259582 | -5.32004 | 6.46E-07 | 6.71E-05 | 0.016976 |
| ENSG0000 | mucosal h | Inflamed | SPAG4              | protein_cc | chr20    | 34203814 | 34208971 | +    | 2240     | 327.0979 | 0        | -1.41976 | 0.267056 | -5.31632 | 6.56E-07 | 6.79E-05 | 0.017248 |
| ENSG0000 | mucosal h | Inflamed | HRH2               | protein_cc | chr5     | 1.75E+08 | 1.75E+08 | +    | 4055     | 130.8998 | 0.02148  | -1.8123  | 0.341104 | -5.31303 | 6.65E-07 | 6.84E-05 | 0.017492 |
| ENSG0000 | mucosal h | Inflamed | IGLV7-43           | IG_V_gene  | chr22    | 22749356 | 22749827 | +    | 385      | 2570.928 | 0.002387 | -1.94684 | 0.36644  | -5.31285 | 6.66E-07 | 6.84E-05 | 0.017505 |
| ENSG0000 | mucosal h | Inflamed | SELE               | protein_cc | chr1     | 1.7E+08  | 1.7E+08  | -    | 4586     | 368.895  | 0.02148  | -2.84159 | 0.535463 | -5.30679 | 6.83E-07 | 6.94E-05 | 0.017965 |
| ENSG0000 | mucosal h | Inflamed | HNF1A-AS           | antisense  | chr12    | 1.21E+08 | 1.21E+08 | -    | 1430     | 226.8401 | 0.011933 | 1.399365 | 0.26375  | 5.30565  | 6.87E-07 | 6.94E-05 | 0.018052 |
| ENSG0000 | mucosal h | Inflamed | VOPP1              | protein_cc | chr7     | 55503749 | 55640681 | -    | 5361     | 3265.1   | 0        | -0.3814  | 0.071888 | -5.30538 | 6.87E-07 | 6.94E-05 | 0.018073 |
| ENSG0000 | mucosal h | Inflamed | IGHGP              | IG_C_pseu  | chr14    | 1.06E+08 | 1.06E+08 | -    | 1178     | 3141.74  | 0.002387 | -2.55447 | 0.481541 | -5.30478 | 6.89E-07 | 6.94E-05 | 0.018119 |

|          |           |          |           |            |       |          |          |   |      |          |          |          |          |          |          |          |          |
|----------|-----------|----------|-----------|------------|-------|----------|----------|---|------|----------|----------|----------|----------|----------|----------|----------|----------|
| ENSG0000 | mucosal h | Inflamed | C2        | protein_cc | chr6  | 31865562 | 31913449 | + | 5536 | 1619.229 | 0        | -0.86218 | 0.162529 | -5.30476 | 6.89E-07 | 6.94E-05 | 0.01812  |
| ENSG0000 | mucosal h | Inflamed | ICAM1     | protein_cc | chr19 | 10381511 | 10397291 | + | 3706 | 4256.539 | 0        | -1.47198 | 0.277688 | -5.30083 | 7.01E-07 | 7.03E-05 | 0.018427 |
| ENSG0000 | mucosal h | Inflamed | IGHG3     | IG_C_gene  | chr14 | 1.06E+08 | 1.06E+08 | - | 1268 | 109430.7 | 0        | -2.93173 | 0.553145 | -5.30011 | 7.03E-07 | 7.03E-05 | 0.018484 |
| ENSG0000 | mucosal h | Inflamed | SSR4      | protein_cc | chrX  | 1.53E+08 | 1.53E+08 | + | 4590 | 10562.49 | 0        | -0.98943 | 0.186857 | -5.29516 | 7.18E-07 | 7.15E-05 | 0.018878 |
| ENSG0000 | mucosal h | Inflamed | IGKV2-29  | IG_V_pseu  | chr2  | 89533655 | 89534393 | - | 372  | 560.7184 | 0.009547 | -2.0121  | 0.38013  | -5.29317 | 7.24E-07 | 7.18E-05 | 0.019038 |
| ENSG0000 | mucosal h | Inflamed | GJA5      | protein_cc | chr1  | 1.47E+08 | 1.47E+08 | - | 3256 | 258.8711 | 0.009547 | -1.57816 | 0.298262 | -5.29117 | 7.30E-07 | 7.20E-05 | 0.019201 |
| ENSG0000 | mucosal h | Inflamed | CXCL6     | protein_cc | chr4  | 74702214 | 74714781 | + | 2183 | 1010.165 | 0.004773 | -3.01314 | 0.569505 | -5.29081 | 7.31E-07 | 7.20E-05 | 0.019231 |
| ENSG0000 | mucosal h | Inflamed | PSMB9     | protein_cc | chr6  | 32811913 | 32827362 | + | 3072 | 2134.874 | 0        | -0.81062 | 0.153274 | -5.28871 | 7.38E-07 | 7.24E-05 | 0.019403 |
| ENSG0000 | mucosal h | Inflamed | IGKV2OR2  | IG_V_pseu  | chr22 | 17395125 | 17395871 | - | 367  | 21.46539 | 0.078759 | -1.59584 | 0.30208  | -5.28284 | 7.57E-07 | 7.38E-05 | 0.019895 |
| ENSG0000 | mucosal h | Inflamed | EDEM2     | protein_cc | chr20 | 33703167 | 33865928 | - | 3380 | 1535.439 | 0        | -0.38687 | 0.073243 | -5.28206 | 7.59E-07 | 7.38E-05 | 0.019961 |
| ENSG0000 | mucosal h | Inflamed | IFI35     | protein_cc | chr17 | 41158742 | 41166473 | + | 1973 | 1526.986 | 0        | -0.5421  | 0.102641 | -5.28153 | 7.61E-07 | 7.38E-05 | 0.020006 |
| ENSG0000 | mucosal h | Inflamed | IGLV5-37  | IG_V_gene  | chr22 | 22781876 | 22782371 | + | 374  | 313.9833 | 0.059666 | -2.32677 | 0.441099 | -5.27495 | 7.83E-07 | 7.56E-05 | 0.020574 |
| ENSG0000 | mucosal h | Inflamed | HERPUD1   | protein_cc | chr16 | 56965960 | 56977798 | + | 4178 | 11964.32 | 0        | -0.63227 | 0.119887 | -5.27384 | 7.86E-07 | 7.57E-05 | 0.020671 |
| ENSG0000 | mucosal h | Inflamed | AP001058  | lincRNA    | chr21 | 45626408 | 45627282 | - | 463  | 11.87112 | 0.038186 | -1.11189 | 0.211286 | -5.26248 | 8.25E-07 | 7.91E-05 | 0.021695 |
| ENSG0000 | mucosal h | Inflamed | IGKV2-28  | IG_V_gene  | chr2  | 89521179 | 89521942 | - | 390  | 844.1313 | 0.002387 | -1.88182 | 0.357631 | -5.26189 | 8.27E-07 | 7.91E-05 | 0.021749 |
| ENSG0000 | mucosal h | Inflamed | MROH7     | protein_cc | chr1  | 55107463 | 55175939 | + | 9052 | 82.13126 | 0.026253 | 1.714805 | 0.326088 | 5.258726 | 8.38E-07 | 7.99E-05 | 0.022043 |
| ENSG0000 | mucosal h | Inflamed | CD40      | protein_cc | chr20 | 44746911 | 44758502 | + | 2368 | 881.8759 | 0        | -1.01104 | 0.192392 | -5.25509 | 8.52E-07 | 8.08E-05 | 0.022386 |
| ENSG0000 | mucosal h | Inflamed | RP11-290F | lincRNA    | chr20 | 48884023 | 48896332 | + | 2451 | 238.5823 | 0        | -1.73698 | 0.331144 | -5.24541 | 8.87E-07 | 8.30E-05 | 0.023325 |
| ENSG0000 | mucosal h | Inflamed | PTGDR     | protein_cc | chr14 | 52734431 | 52743442 | + | 3033 | 367.7757 | 0        | 1.226969 | 0.233915 | 5.245374 | 8.87E-07 | 8.30E-05 | 0.023329 |
| ENSG0000 | mucosal h | Inflamed | C1orf167  | protein_cc | chr1  | 11821844 | 11849642 | + | 6505 | 25.96659 | 0.004773 | -1.18578 | 0.226081 | -5.24494 | 8.89E-07 | 8.30E-05 | 0.023372 |
| ENSG0000 | mucosal h | Inflamed | NLRP12    | protein_cc | chr19 | 54296857 | 54327648 | - | 5100 | 70.80907 | 0.02148  | -1.95598 | 0.372944 | -5.24469 | 8.90E-07 | 8.30E-05 | 0.023396 |
| ENSG0000 | mucosal h | Inflamed | NNMT      | protein_cc | chr11 | 1.14E+08 | 1.14E+08 | + | 2919 | 1120.871 | 0        | -1.58747 | 0.302683 | -5.24465 | 8.90E-07 | 8.30E-05 | 0.0234   |
| ENSG0000 | mucosal h | Inflamed | RP11-139C | pseudoger  | chr4  | 9564791  | 9565570  | + | 780  | 1.331742 | 0.677804 | 0.777621 | 0.148336 | 5.242299 | 8.99E-07 | 8.35E-05 | 0.023635 |
| ENSG0000 | mucosal h | Inflamed | HPCA      | protein_cc | chr1  | 33351595 | 33364042 | + | 1991 | 30.93317 | 0.00716  | 1.097259 | 0.209341 | 5.241492 | 9.02E-07 | 8.35E-05 | 0.023716 |
| ENSG0000 | mucosal h | Inflamed | SLC11A1   | protein_cc | chr2  | 2.19E+08 | 2.19E+08 | + | 8676 | 689.4368 | 0        | -2.46387 | 0.470396 | -5.23787 | 9.16E-07 | 8.45E-05 | 0.024083 |
| ENSG0000 | mucosal h | Inflamed | IGKV1-39  | IG_V_gene  | chr2  | 89619383 | 89619904 | - | 398  | 726.0263 | 0        | -2.0136  | 0.384762 | -5.23335 | 9.34E-07 | 8.56E-05 | 0.024549 |
| ENSG0000 | mucosal h | Inflamed | IGLV7-46  | IG_V_gene  | chr22 | 22723982 | 22724454 | + | 384  | 4029.036 | 0        | -1.9059  | 0.364202 | -5.2331  | 9.35E-07 | 8.56E-05 | 0.024575 |
| ENSG0000 | mucosal h | Inflamed | LGALS12   | protein_cc | chr11 | 63273556 | 63284246 | + | 2270 | 56.41766 | 0.033413 | -1.53465 | 0.293334 | -5.23173 | 9.40E-07 | 8.58E-05 | 0.024717 |
| ENSG0000 | mucosal h | Inflamed | BCL2L1    | protein_cc | chr20 | 30252255 | 30311792 | - | 3314 | 4955.94  | 0        | -0.49115 | 0.093939 | -5.22841 | 9.54E-07 | 8.67E-05 | 0.025068 |
| ENSG0000 | mucosal h | Inflamed | LILRA1    | protein_cc | chr19 | 55105047 | 55113555 | + | 3587 | 185.6158 | 0.002387 | -1.48607 | 0.284737 | -5.2191  | 9.92E-07 | 8.99E-05 | 0.026075 |
| ENSG0000 | mucosal h | Inflamed | LDLRAD2   | protein_cc | chr1  | 22138758 | 22151714 | + | 4490 | 102.9045 | 0.00716  | -1.28266 | 0.24593  | -5.21556 | 1.01E-06 | 9.02E-05 | 0.026469 |
| ENSG0000 | mucosal h | Inflamed | SEMA4A    | protein_cc | chr1  | 1.56E+08 | 1.56E+08 | + | 6676 | 1647.468 | 0        | -0.97001 | 0.185991 | -5.21537 | 1.01E-06 | 9.02E-05 | 0.026491 |
| ENSG0000 | mucosal h | Inflamed | RP11-166E | protein_cc | chr16 | 12021230 | 12070500 | - | 2233 | 14.24821 | 0.038186 | 0.888602 | 0.170409 | 5.21453  | 1.01E-06 | 9.02E-05 | 0.026585 |
| ENSG0000 | mucosal h | Inflamed | EMX1      | protein_cc | chr2  | 73143389 | 73162020 | + | 3721 | 12.63962 | 0.210024 | 1.319893 | 0.253155 | 5.213778 | 1.01E-06 | 9.02E-05 | 0.026669 |
| ENSG0000 | mucosal h | Inflamed | EGFL6     | protein_cc | chrX  | 13587724 | 13651694 | + | 2607 | 141.9523 | 0.047733 | -2.47723 | 0.475134 | -5.21374 | 1.01E-06 | 9.02E-05 | 0.026674 |
| ENSG0000 | mucosal h | Inflamed | ALPL      | protein_cc | chr1  | 21835858 | 21904905 | + | 3014 | 1299.1   | 0        | -1.94459 | 0.372986 | -5.21358 | 1.02E-06 | 9.02E-05 | 0.026692 |
| ENSG0000 | mucosal h | Inflamed | RP11-395C | pseudoger  | chr5  | 1.26E+08 | 1.26E+08 | - | 303  | 7.701671 | 0.23389  | 1.104027 | 0.211803 | 5.212512 | 1.02E-06 | 9.03E-05 | 0.026812 |
| ENSG0000 | mucosal h | Inflamed | DOC2A     | protein_cc | chr16 | 30016830 | 30034591 | - | 6426 | 101.0406 | 0.004773 | 1.420796 | 0.272922 | 5.205864 | 1.05E-06 | 9.25E-05 | 0.027577 |
| ENSG0000 | mucosal h | Inflamed | TYMP      | protein_cc | chr22 | 50964181 | 50968485 | - | 3320 | 5059.427 | 0        | -1.14888 | 0.220881 | -5.20136 | 1.07E-06 | 9.38E-05 | 0.028106 |
| ENSG0000 | mucosal h | Inflamed | RP11-219E | lincRNA    | chr14 | 21366144 | 21404414 | - | 351  | 3.718377 | 0.587112 | 0.828945 | 0.159381 | 5.201016 | 1.07E-06 | 9.38E-05 | 0.028147 |

|          |           |          |           |                  |          |          |   |       |          |          |          |          |          |          |          |          |
|----------|-----------|----------|-----------|------------------|----------|----------|---|-------|----------|----------|----------|----------|----------|----------|----------|----------|
| ENSG0000 | mucosal h | Inflamed | PADI4     | protein_cc chr1  | 17634690 | 17690499 | + | 2971  | 92.25537 | 0.0358   | -2.09249 | 0.402608 | -5.19733 | 1.09E-06 | 9.50E-05 | 0.028589 |
| ENSG0000 | mucosal h | Inflamed | KCNJ15    | protein_cc chr21 | 39529128 | 39679279 | + | 9685  | 223.6158 | 0.069212 | -2.652   | 0.510382 | -5.19612 | 1.09E-06 | 9.51E-05 | 0.028735 |
| ENSG0000 | mucosal h | Inflamed | HBD       | protein_cc chr11 | 5253908  | 5256600  | - | 1062  | 8.539379 | 0.221957 | -1.39178 | 0.268199 | -5.18936 | 1.12E-06 | 9.76E-05 | 0.029566 |
| ENSG0000 | mucosal h | Inflamed | SMOX      | protein_cc chr20 | 4101627  | 4168394  | + | 4943  | 857.6874 | 0        | -1.21095 | 0.233397 | -5.18835 | 1.13E-06 | 9.77E-05 | 0.029694 |
| ENSG0000 | mucosal h | Inflamed | CTSB      | protein_cc chr8  | 11700033 | 11726957 | - | 7438  | 37894.52 | 0        | -0.69884 | 0.134735 | -5.18681 | 1.14E-06 | 9.80E-05 | 0.029887 |
| ENSG0000 | mucosal h | Inflamed | SOCS3     | protein_cc chr17 | 76352864 | 76356158 | - | 2729  | 6163.48  | 0        | -1.87209 | 0.361004 | -5.18579 | 1.14E-06 | 9.81E-05 | 0.030015 |
| ENSG0000 | mucosal h | Inflamed | CLPTM1L   | protein_cc chr5  | 1317859  | 1345214  | - | 6557  | 6656.172 | 0        | -0.45098 | 0.086984 | -5.1846  | 1.15E-06 | 9.83E-05 | 0.030167 |
| ENSG0000 | mucosal h | Inflamed | XXyac-YM2 | antisense chr9   | 90471930 | 90474314 | - | 2014  | 22.36277 | 0.348449 | 1.559919 | 0.301108 | 5.180599 | 1.17E-06 | 9.96E-05 | 0.03068  |
| ENSG0000 | mucosal h | Inflamed | IGKV1-6   | IG_V_gene chr2   | 89265781 | 89266286 | - | 380   | 3773.427 | 0        | -1.82437 | 0.35249  | -5.17566 | 1.19E-06 | 0.000101 | 0.031325 |
| ENSG0000 | mucosal h | Inflamed | SH2B2     | protein_cc chr7  | 1.02E+08 | 1.02E+08 | + | 2236  | 285.8067 | 0        | -1.10393 | 0.213342 | -5.17447 | 1.20E-06 | 0.000102 | 0.031483 |
| ENSG0000 | mucosal h | Inflamed | IGKV1D-35 | IG_V_gene chr2   | 89901292 | 89901791 | + | 376   | 967.7566 | 0        | -1.85827 | 0.359207 | -5.17325 | 1.20E-06 | 0.000102 | 0.031645 |
| ENSG0000 | mucosal h | Inflamed | OTUD7A    | protein_cc chr15 | 31775329 | 32162992 | - | 6624  | 83.00955 | 0.011933 | 0.838697 | 0.162234 | 5.169661 | 1.22E-06 | 0.000103 | 0.032127 |
| ENSG0000 | mucosal h | Inflamed | LILRA5    | protein_cc chr19 | 54818353 | 54824409 | - | 1762  | 380.7303 | 0        | -1.84312 | 0.356545 | -5.16939 | 1.22E-06 | 0.000103 | 0.032163 |
| ENSG0000 | mucosal h | Inflamed | IL12RB1   | protein_cc chr19 | 18169805 | 18209754 | - | 4298  | 583.284  | 0        | -0.94954 | 0.183805 | -5.16602 | 1.24E-06 | 0.000104 | 0.032622 |
| ENSG0000 | mucosal h | Inflamed | RP11-960L | lincRNA chr16    | 81771853 | 81801311 | + | 1772  | 32.60859 | 0.023866 | -1.34013 | 0.259559 | -5.1631  | 1.26E-06 | 0.000104 | 0.033027 |
| ENSG0000 | mucosal h | Inflamed | PAQR5     | protein_cc chr15 | 69591286 | 69700119 | + | 6209  | 1667.924 | 0        | 1.138573 | 0.220535 | 5.162765 | 1.26E-06 | 0.000104 | 0.033073 |
| ENSG0000 | mucosal h | Inflamed | MT-ND1    | protein_cc chrM  | 3307     | 4262     | + | 956   | 399641.4 | 0        | 0.648173 | 0.125553 | 5.162543 | 1.26E-06 | 0.000104 | 0.033104 |
| ENSG0000 | mucosal h | Inflamed | NTPCR     | protein_cc chr1  | 2.33E+08 | 2.33E+08 | + | 15854 | 1093.649 | 0        | 0.414739 | 0.080351 | 5.16158  | 1.26E-06 | 0.000104 | 0.033238 |
| ENSG0000 | mucosal h | Inflamed | BST2      | protein_cc chr19 | 17513748 | 17516457 | - | 1119  | 1592.995 | 0        | -0.97078 | 0.188083 | -5.16141 | 1.27E-06 | 0.000104 | 0.033262 |
| ENSG0000 | mucosal h | Inflamed | C2CD4A    | protein_cc chr15 | 62359176 | 62363116 | + | 3445  | 350.7518 | 0.004773 | -1.65746 | 0.32132  | -5.15828 | 1.28E-06 | 0.000105 | 0.033703 |
| ENSG0000 | mucosal h | Inflamed | NBPF1     | protein_cc chr1  | 16888814 | 16940057 | - | 12212 | 3064.723 | 0        | 0.975708 | 0.189175 | 5.157704 | 1.29E-06 | 0.000105 | 0.033785 |
| ENSG0000 | mucosal h | Inflamed | SYT7      | protein_cc chr11 | 61282785 | 61348620 | - | 5953  | 1333.243 | 0        | 1.108335 | 0.21489  | 5.157681 | 1.29E-06 | 0.000105 | 0.033788 |
| ENSG0000 | mucosal h | Inflamed | SLAMF7    | protein_cc chr1  | 1.61E+08 | 1.61E+08 | + | 4604  | 3738.169 | 0        | -1.20429 | 0.233591 | -5.15552 | 1.30E-06 | 0.000105 | 0.034096 |
| ENSG0000 | mucosal h | Inflamed | RPL10L    | protein_cc chr14 | 47120222 | 47121028 | - | 807   | 19.14081 | 0.107399 | 1.394839 | 0.270581 | 5.154981 | 1.30E-06 | 0.000105 | 0.034174 |
| ENSG0000 | mucosal h | Inflamed | KISS1R    | protein_cc chr19 | 917287   | 921015   | + | 1680  | 9.374702 | 0.140811 | -1.25106 | 0.242796 | -5.15273 | 1.31E-06 | 0.000106 | 0.034499 |
| ENSG0000 | mucosal h | Inflamed | SOCS1     | protein_cc chr16 | 11348262 | 11350036 | - | 1225  | 621.043  | 0        | -1.32965 | 0.258232 | -5.14903 | 1.33E-06 | 0.000107 | 0.03504  |
| ENSG0000 | mucosal h | Inflamed | GJA4      | protein_cc chr1  | 35258599 | 35261348 | + | 1717  | 320.4153 | 0.002387 | -1.48179 | 0.287819 | -5.14835 | 1.34E-06 | 0.000107 | 0.035139 |
| ENSG0000 | mucosal h | Inflamed | SLC1A4    | protein_cc chr2  | 65215611 | 65250999 | + | 6939  | 2935.217 | 0        | -0.77652 | 0.150833 | -5.14817 | 1.34E-06 | 0.000107 | 0.035166 |
| ENSG0000 | mucosal h | Inflamed | IGHV3-49  | IG_V_gene chr14  | 1.07E+08 | 1.07E+08 | - | 437   | 4533.079 | 0        | -1.82571 | 0.354807 | -5.14564 | 1.35E-06 | 0.000108 | 0.035542 |
| ENSG0000 | mucosal h | Inflamed | PHOSPHO2  | protein_cc chr17 | 47300724 | 47308128 | - | 2375  | 73.46062 | 0.02864  | -2.12298 | 0.412816 | -5.14268 | 1.37E-06 | 0.000109 | 0.035987 |
| ENSG0000 | mucosal h | Inflamed | MIR4435-1 | lincRNA chr2     | 1.12E+08 | 1.12E+08 | - | 8500  | 381.7733 | 0        | -1.0517  | 0.204554 | -5.14146 | 1.38E-06 | 0.000109 | 0.036172 |
| ENSG0000 | mucosal h | Inflamed | MFSD4     | protein_cc chr1  | 2.06E+08 | 2.06E+08 | + | 5570  | 1520.668 | 0        | 1.706772 | 0.332016 | 5.140633 | 1.38E-06 | 0.000109 | 0.036297 |
| ENSG0000 | mucosal h | Inflamed | RPS3AP40  | pseudoger chr11  | 67693122 | 67693902 | - | 781   | 1.293556 | 0.692124 | 0.724934 | 0.14105  | 5.139572 | 1.39E-06 | 0.000109 | 0.036459 |
| ENSG0000 | mucosal h | Inflamed | IGHG1     | IG_C_gene chr14  | 1.06E+08 | 1.06E+08 | - | 2762  | 647100.2 | 0        | -2.58077 | 0.502282 | -5.13809 | 1.40E-06 | 0.00011  | 0.036687 |
| ENSG0000 | mucosal h | Inflamed | CTA-384D1 | lincRNA chr22    | 50981079 | 50981440 | + | 362   | 22.46778 | 0.050119 | -1.38215 | 0.269038 | -5.13737 | 1.40E-06 | 0.00011  | 0.036798 |
| ENSG0000 | mucosal h | Inflamed | CTSH      | protein_cc chr15 | 79213400 | 79241916 | - | 5892  | 3696.647 | 0        | -0.79594 | 0.154973 | -5.13594 | 1.41E-06 | 0.00011  | 0.037019 |
| ENSG0000 | mucosal h | Inflamed | C19orf38  | protein_cc chr19 | 10947251 | 10980466 | + | 1565  | 155.2983 | 0        | -1.21686 | 0.236952 | -5.13548 | 1.41E-06 | 0.00011  | 0.037091 |
| ENSG0000 | mucosal h | Inflamed | LCN15     | protein_cc chr9  | 1.4E+08  | 1.4E+08  | - | 2887  | 28.99523 | 0.126492 | 1.533608 | 0.298683 | 5.134575 | 1.42E-06 | 0.00011  | 0.037232 |
| ENSG0000 | mucosal h | Inflamed | SERPINI1  | protein_cc chr3  | 1.67E+08 | 1.68E+08 | + | 2418  | 103.3747 | 0.004773 | -1.20692 | 0.235128 | -5.13302 | 1.43E-06 | 0.00011  | 0.037476 |
| ENSG0000 | mucosal h | Inflamed | RP11-285C | lincRNA chr10    | 45432956 | 45451173 | + | 425   | 3.491647 | 0.486874 | 0.897497 | 0.174857 | 5.132734 | 1.43E-06 | 0.00011  | 0.037521 |

|          |           |          |           |            |       |          |          |   |       |          |          |          |          |          |          |          |          |
|----------|-----------|----------|-----------|------------|-------|----------|----------|---|-------|----------|----------|----------|----------|----------|----------|----------|----------|
| ENSG0000 | mucosal h | Inflamed | SELP      | protein_cc | chr1  | 1.7E+08  | 1.7E+08  | - | 3490  | 719.6229 | 0.002387 | -1.83013 | 0.356617 | -5.13193 | 1.43E-06 | 0.00011  | 0.037648 |
| ENSG0000 | mucosal h | Inflamed | ZDHHC11E  | protein_cc | chr5  | 710475   | 767067   | - | 3789  | 150.8544 | 0.016706 | 1.657048 | 0.322972 | 5.130628 | 1.44E-06 | 0.00011  | 0.037854 |
| ENSG0000 | mucosal h | Inflamed | IGKV2-24  | IG_V_gene  | chr2  | 89475812 | 89476644 | - | 390   | 3608.019 | 0.002387 | -1.86335 | 0.363208 | -5.13025 | 1.44E-06 | 0.00011  | 0.037913 |
| ENSG0000 | mucosal h | Inflamed | RGS16     | protein_cc | chr1  | 1.83E+08 | 1.83E+08 | - | 2427  | 281.432  | 0.002387 | -1.43592 | 0.279894 | -5.13021 | 1.44E-06 | 0.00011  | 0.03792  |
| ENSG0000 | mucosal h | Inflamed | CPXM1     | protein_cc | chr20 | 2774715  | 2781283  | - | 2391  | 1272.024 | 0        | -1.59832 | 0.31171  | -5.12757 | 1.46E-06 | 0.000111 | 0.038343 |
| ENSG0000 | mucosal h | Inflamed | IFITM1    | protein_cc | chr11 | 313506   | 315272   | + | 1080  | 3878.456 | 0        | -0.9526  | 0.185781 | -5.12756 | 1.46E-06 | 0.000111 | 0.038344 |
| ENSG0000 | mucosal h | Inflamed | IGKV3D-11 | IG_V_gene  | chr2  | 90211643 | 90212253 | + | 442   | 263.3604 | 0.002387 | -1.65662 | 0.323357 | -5.12317 | 1.49E-06 | 0.000113 | 0.039056 |
| ENSG0000 | mucosal h | Inflamed | RP11-296C | antisense  | chr1  | 1.73E+08 | 1.73E+08 | - | 2282  | 43.57757 | 0.004773 | 0.981302 | 0.191721 | 5.118394 | 1.52E-06 | 0.000114 | 0.039846 |
| ENSG0000 | mucosal h | Inflamed | NFE2      | protein_cc | chr12 | 54685895 | 54694905 | - | 2469  | 159.4487 | 0.011933 | -2.1629  | 0.422802 | -5.11564 | 1.53E-06 | 0.000115 | 0.040308 |
| ENSG0000 | mucosal h | Inflamed | CD180     | protein_cc | chr5  | 66478103 | 66492627 | - | 3006  | 506.611  | 0        | -1.32427 | 0.258961 | -5.1138  | 1.55E-06 | 0.000115 | 0.04062  |
| ENSG0000 | mucosal h | Inflamed | PRRX2     | protein_cc | chr9  | 1.32E+08 | 1.32E+08 | + | 1233  | 97.34845 | 0.002387 | -1.39431 | 0.27267  | -5.11356 | 1.55E-06 | 0.000115 | 0.040661 |
| ENSG0000 | mucosal h | Inflamed | RP11-351J | lincRNA    | chr6  | 1.68E+08 | 1.68E+08 | - | 4569  | 6.579952 | 0.124105 | 0.945349 | 0.18488  | 5.113321 | 1.55E-06 | 0.000115 | 0.040702 |
| ENSG0000 | mucosal h | Inflamed | IGLV3-16  | IG_V_gene  | chr22 | 23089870 | 23090398 | + | 375   | 123.5752 | 0.009547 | -1.81632 | 0.355248 | -5.11283 | 1.55E-06 | 0.000115 | 0.040785 |
| ENSG0000 | mucosal h | Inflamed | ICAM3     | protein_cc | chr19 | 10444452 | 10450499 | - | 2950  | 2064.184 | 0        | -0.98911 | 0.193477 | -5.11229 | 1.55E-06 | 0.000115 | 0.040878 |
| ENSG0000 | mucosal h | Inflamed | CCDC69    | protein_cc | chr5  | 1.51E+08 | 1.51E+08 | - | 4993  | 3479.79  | 0        | -1.031   | 0.201692 | -5.11175 | 1.56E-06 | 0.000115 | 0.040971 |
| ENSG0000 | mucosal h | Inflamed | C6        | protein_cc | chr5  | 41142336 | 41261540 | - | 4739  | 11.81384 | 0.162291 | 1.212451 | 0.237198 | 5.111561 | 1.56E-06 | 0.000115 | 0.041003 |
| ENSG0000 | mucosal h | Inflamed | MT1F      | protein_cc | chr16 | 56691606 | 56694610 | + | 1889  | 546.494  | 0        | 1.294097 | 0.253183 | 5.111319 | 1.56E-06 | 0.000115 | 0.041044 |
| ENSG0000 | mucosal h | Inflamed | HOXD-AS1  | antisense  | chr2  | 1.77E+08 | 1.77E+08 | - | 4851  | 1647.928 | 0        | 1.004058 | 0.19647  | 5.110481 | 1.57E-06 | 0.000115 | 0.041188 |
| ENSG0000 | mucosal h | Inflamed | HLA-DOB   | protein_cc | chr6  | 32780540 | 32784825 | - | 1858  | 252.2601 | 0        | -1.3463  | 0.263514 | -5.10902 | 1.58E-06 | 0.000115 | 0.04144  |
| ENSG0000 | mucosal h | Inflamed | FFAR2     | protein_cc | chr19 | 35934809 | 35942669 | + | 2149  | 712.7422 | 0        | -2.12578 | 0.416117 | -5.10863 | 1.58E-06 | 0.000115 | 0.04151  |
| ENSG0000 | mucosal h | Inflamed | CYP1B1-AS | antisense  | chr2  | 38302791 | 38408997 | + | 4138  | 18.33652 | 0.040573 | 1.048465 | 0.205301 | 5.106961 | 1.59E-06 | 0.000115 | 0.0418   |
| ENSG0000 | mucosal h | Inflamed | RP3-407E4 | pseudoger  | chr6  | 64104912 | 64107011 | - | 1548  | 1.968974 | 0.673031 | 0.9367   | 0.183431 | 5.106537 | 1.59E-06 | 0.000115 | 0.041874 |
| ENSG0000 | mucosal h | Inflamed | THR3      | protein_cc | chr3  | 24158651 | 24536773 | - | 8709  | 458.2816 | 0.002387 | 1.421116 | 0.278295 | 5.106518 | 1.59E-06 | 0.000115 | 0.041877 |
| ENSG0000 | mucosal h | Inflamed | ZBTB32    | protein_cc | chr19 | 36195429 | 36207940 | + | 2770  | 83.68974 | 0.004773 | -1.49464 | 0.293384 | -5.09447 | 1.68E-06 | 0.000121 | 0.044041 |
| ENSG0000 | mucosal h | Inflamed | LILRB2    | protein_cc | chr19 | 54777675 | 54785039 | - | 3810  | 1210.205 | 0        | -1.43236 | 0.281166 | -5.09433 | 1.68E-06 | 0.000121 | 0.044067 |
| ENSG0000 | mucosal h | Inflamed | DEFB4A    | protein_cc | chr8  | 7752151  | 7754233  | + | 380   | 94.69928 | 0.424821 | -2.93618 | 0.57696  | -5.08905 | 1.71E-06 | 0.000123 | 0.04505  |
| ENSG0000 | mucosal h | Inflamed | KYNU      | protein_cc | chr2  | 1.44E+08 | 1.44E+08 | + | 3070  | 329.8353 | 0        | -1.92806 | 0.379028 | -5.08685 | 1.73E-06 | 0.000124 | 0.045465 |
| ENSG0000 | mucosal h | Inflamed | CTA-384D  | lincRNA    | chr22 | 50980734 | 50981335 | - | 602   | 22.01671 | 0.038186 | -1.27313 | 0.250315 | -5.08611 | 1.73E-06 | 0.000124 | 0.045606 |
| ENSG0000 | mucosal h | Inflamed | PREB      | protein_cc | chr2  | 27353624 | 27357543 | - | 3221  | 3084.733 | 0        | -0.43295 | 0.085169 | -5.08343 | 1.75E-06 | 0.000125 | 0.046119 |
| ENSG0000 | mucosal h | Inflamed | TXNDC5    | protein_cc | chr6  | 7881483  | 8026646  | - | 4701  | 977.0811 | 0        | -0.98769 | 0.194313 | -5.08298 | 1.76E-06 | 0.000125 | 0.046207 |
| ENSG0000 | mucosal h | Inflamed | AMACR     | protein_cc | chr5  | 33986283 | 34008220 | - | 4845  | 264.0501 | 0        | 0.908839 | 0.178827 | 5.082228 | 1.76E-06 | 0.000125 | 0.046351 |
| ENSG0000 | mucosal h | Inflamed | MT-CO1    | protein_cc | chrM  | 5904     | 7445     | + | 1542  | 1910545  | 0        | 0.671547 | 0.132181 | 5.08051  | 1.78E-06 | 0.000125 | 0.046685 |
| ENSG0000 | mucosal h | Inflamed | C1orf21   | protein_cc | chr1  | 1.84E+08 | 1.85E+08 | + | 10971 | 2657.248 | 0        | 0.701267 | 0.138032 | 5.080461 | 1.78E-06 | 0.000125 | 0.046695 |
| ENSG0000 | mucosal h | Inflamed | PTPN7     | protein_cc | chr1  | 2.02E+08 | 2.02E+08 | - | 5906  | 1321.575 | 0        | -0.9951  | 0.195873 | -5.08035 | 1.78E-06 | 0.000125 | 0.046716 |
| ENSG0000 | mucosal h | Inflamed | THY1      | protein_cc | chr11 | 1.19E+08 | 1.19E+08 | - | 5923  | 3910.936 | 0        | -1.37095 | 0.269892 | -5.07963 | 1.78E-06 | 0.000125 | 0.046857 |
| ENSG0000 | mucosal h | Inflamed | LY6D      | protein_cc | chr8  | 1.44E+08 | 1.44E+08 | - | 1553  | 75.7852  | 0.367542 | -2.70342 | 0.53225  | -5.07924 | 1.79E-06 | 0.000125 | 0.046934 |
| ENSG0000 | mucosal h | Inflamed | AP000344  | pseudoger  | chr22 | 23788785 | 23803020 | + | 795   | 26.05489 | 0.133652 | 1.431076 | 0.281788 | 5.078551 | 1.79E-06 | 0.000125 | 0.047068 |
| ENSG0000 | mucosal h | Inflamed | CTD-2033  | antisense  | chr15 | 39885781 | 39886432 | - | 281   | 7.589499 | 0.315036 | 1.422545 | 0.280193 | 5.077013 | 1.80E-06 | 0.000125 | 0.047371 |
| ENSG0000 | mucosal h | Inflamed | IGHV1-69  | IG_V_gene  | chr14 | 1.07E+08 | 1.07E+08 | - | 412   | 11575.36 | 0        | -1.8377  | 0.36212  | -5.07484 | 1.82E-06 | 0.000126 | 0.047804 |
| ENSG0000 | mucosal h | Inflamed | IL1B      | protein_cc | chr2  | 1.14E+08 | 1.14E+08 | - | 3096  | 3775.084 | 0        | -2.28952 | 0.451288 | -5.07331 | 1.83E-06 | 0.000127 | 0.048109 |

|          |           |          |           |            |       |          |          |   |      |          |          |          |          |          |          |          |          |
|----------|-----------|----------|-----------|------------|-------|----------|----------|---|------|----------|----------|----------|----------|----------|----------|----------|----------|
| ENSG0000 | mucosal h | Inflamed | TMEM72    | protein_cc | chr10 | 45406648 | 45432450 | + | 3157 | 479.7208 | 0.02864  | 2.514135 | 0.495685 | 5.072039 | 1.84E-06 | 0.000127 | 0.048364 |
| ENSG0000 | mucosal h | Inflamed | ALOX12B   | protein_cc | chr17 | 7975954  | 7991021  | - | 2656 | 12.72792 | 0.081146 | 1.068545 | 0.210702 | 5.071364 | 1.84E-06 | 0.000127 | 0.0485   |
| ENSG0000 | mucosal h | Inflamed | TREML2    | protein_cc | chr6  | 41158015 | 41168932 | - | 3302 | 216.315  | 0.00716  | -2.00755 | 0.396409 | -5.06433 | 1.90E-06 | 0.00013  | 0.049944 |
| ENSG0000 | mucosal h | Inflamed | AC006132  | protein_cc | chr19 | 46144752 | 46146098 | + | 1235 | 47.68974 | 0.002387 | -0.99695 | 0.196951 | -5.06189 | 1.92E-06 | 0.000131 | 0.050453 |
| ENSG0000 | mucosal h | Inflamed | SEMA7A    | protein_cc | chr15 | 74701630 | 74726808 | - | 4309 | 825.821  | 0        | -1.23606 | 0.244427 | -5.05696 | 1.96E-06 | 0.000134 | 0.051501 |
| ENSG0000 | mucosal h | Inflamed | MAPKAPK   | protein_cc | chr1  | 2.07E+08 | 2.07E+08 | + | 4195 | 7827.566 | 0        | -0.64211 | 0.126985 | -5.05659 | 1.96E-06 | 0.000134 | 0.05158  |
| ENSG0000 | mucosal h | Inflamed | IGHV6-1   | IG_V_gene  | chr14 | 1.06E+08 | 1.06E+08 | - | 415  | 3655.678 | 0        | -1.95185 | 0.386034 | -5.05615 | 1.97E-06 | 0.000134 | 0.051673 |
| ENSG0000 | mucosal h | Inflamed | IGKV3D-15 | IG_V_gene  | chr2  | 90153696 | 90154258 | + | 394  | 1237.723 | 0.002387 | -1.89699 | 0.375308 | -5.05449 | 1.98E-06 | 0.000134 | 0.052032 |
| ENSG0000 | mucosal h | Inflamed | BEST2     | protein_cc | chr19 | 12862516 | 12869272 | + | 2646 | 1466.463 | 0.011933 | 2.805078 | 0.555415 | 5.050414 | 2.01E-06 | 0.000136 | 0.052922 |
| ENSG0000 | mucosal h | Inflamed | RP11-467J | antisense  | chr16 | 53069602 | 53086785 | - | 464  | 10.75418 | 0.124105 | 1.054873 | 0.208916 | 5.049255 | 2.02E-06 | 0.000136 | 0.053178 |
| ENSG0000 | mucosal h | Inflamed | CD68      | protein_cc | chr17 | 7482785  | 7485429  | + | 2187 | 264.4391 | 0        | -0.59166 | 0.11718  | -5.04914 | 2.02E-06 | 0.000136 | 0.053204 |
| ENSG0000 | mucosal h | Inflamed | CD300E    | protein_cc | chr17 | 72606026 | 72619897 | - | 3772 | 537.8711 | 0.011933 | -2.54783 | 0.504719 | -5.04802 | 2.03E-06 | 0.000136 | 0.053452 |
| ENSG0000 | mucosal h | Inflamed | FSIP1     | protein_cc | chr15 | 39892232 | 40075031 | - | 2951 | 28.15752 | 0.019093 | 1.22059  | 0.241911 | 5.045616 | 2.05E-06 | 0.000137 | 0.053989 |
| ENSG0000 | mucosal h | Inflamed | ADPRHL1   | protein_cc | chr13 | 1.14E+08 | 1.14E+08 | - | 2308 | 134.179  | 0        | 0.652458 | 0.129355 | 5.043948 | 2.07E-06 | 0.000137 | 0.054365 |
| ENSG0000 | mucosal h | Inflamed | SLC22A23  | protein_cc | chr6  | 3269196  | 3457256  | - | 8898 | 5764.945 | 0        | 0.996508 | 0.197588 | 5.04336  | 2.07E-06 | 0.000137 | 0.054498 |
| ENSG0000 | mucosal h | Inflamed | LILRA2    | protein_cc | chr19 | 55084387 | 55099027 | + | 2622 | 162.8401 | 0.004773 | -1.79392 | 0.35573  | -5.04293 | 2.08E-06 | 0.000137 | 0.054595 |
| ENSG0000 | mucosal h | Inflamed | IGKV1-17  | IG_V_gene  | chr2  | 89416833 | 89417335 | - | 378  | 8348.06  | 0        | -1.96441 | 0.389568 | -5.04255 | 2.08E-06 | 0.000137 | 0.054682 |
| ENSG0000 | mucosal h | Inflamed | FGR       | protein_cc | chr1  | 27938575 | 27961788 | - | 3474 | 1172.723 | 0        | -1.50384 | 0.298235 | -5.04246 | 2.08E-06 | 0.000137 | 0.054701 |
| ENSG0000 | mucosal h | Inflamed | ROPN1     | protein_cc | chr3  | 1.24E+08 | 1.24E+08 | - | 4395 | 4.167064 | 0.494033 | 0.925108 | 0.183543 | 5.04029  | 2.10E-06 | 0.000138 | 0.055198 |
| ENSG0000 | mucosal h | Inflamed | IGKV6D-21 | IG_V_gene  | chr2  | 90060377 | 90060995 | + | 409  | 393.3699 | 0.004773 | -1.91097 | 0.37935  | -5.0375  | 2.12E-06 | 0.000139 | 0.055842 |
| ENSG0000 | mucosal h | Inflamed | G0S2      | protein_cc | chr1  | 2.1E+08  | 2.1E+08  | + | 866  | 1130.01  | 0        | -2.20775 | 0.438303 | -5.03704 | 2.13E-06 | 0.000139 | 0.055948 |
| ENSG0000 | mucosal h | Inflamed | ACOXL     | protein_cc | chr2  | 1.11E+08 | 1.12E+08 | + | 5747 | 50.00955 | 0.004773 | -1.29641 | 0.2574   | -5.03657 | 2.13E-06 | 0.000139 | 0.056057 |
| ENSG0000 | mucosal h | Inflamed | S100A12   | protein_cc | chr1  | 1.53E+08 | 1.53E+08 | - | 516  | 126.5871 | 0.24105  | -2.7416  | 0.544397 | -5.03603 | 2.14E-06 | 0.000139 | 0.056183 |
| ENSG0000 | mucosal h | Inflamed | WISP1     | protein_cc | chr8  | 1.34E+08 | 1.34E+08 | + | 3844 | 516.3652 | 0.00716  | -1.98693 | 0.394648 | -5.03469 | 2.15E-06 | 0.00014  | 0.056497 |
| ENSG0000 | mucosal h | Inflamed | CXCL5     | protein_cc | chr4  | 74861359 | 74864496 | - | 2538 | 1725.842 | 0.081146 | -4.25502 | 0.845378 | -5.03327 | 2.16E-06 | 0.00014  | 0.056831 |
| ENSG0000 | mucosal h | Inflamed | RP11-794C | lincRNA    | chr11 | 61306988 | 61309731 | - | 1831 | 40.53938 | 0.0358   | 1.443125 | 0.286768 | 5.032372 | 2.17E-06 | 0.00014  | 0.057044 |
| ENSG0000 | mucosal h | Inflamed | IGLC7     | IG_C_gene  | chr22 | 23264766 | 23265203 | + | 438  | 3502.339 | 0        | -1.82149 | 0.361973 | -5.03212 | 2.17E-06 | 0.00014  | 0.057102 |
| ENSG0000 | mucosal h | Inflamed | C8orf47   | protein_cc | chr8  | 99076539 | 99105838 | + | 1761 | 33.6969  | 0.031026 | 1.27974  | 0.254354 | 5.031324 | 2.18E-06 | 0.00014  | 0.057292 |
| ENSG0000 | mucosal h | Inflamed | CHRD12    | protein_cc | chr11 | 74407474 | 74442430 | - | 3073 | 621.5513 | 0.011933 | -2.5243  | 0.501995 | -5.02853 | 2.20E-06 | 0.000142 | 0.05796  |
| ENSG0000 | mucosal h | Inflamed | LBP       | protein_cc | chr20 | 36974759 | 37005665 | + | 1961 | 41.28401 | 0.231504 | -2.44391 | 0.486591 | -5.02251 | 2.26E-06 | 0.000145 | 0.059426 |
| ENSG0000 | mucosal h | Inflamed | MT-CYB    | protein_cc | chrM  | 14747    | 15887    | + | 1141 | 582371.6 | 0        | 0.662227 | 0.131861 | 5.022168 | 2.26E-06 | 0.000145 | 0.059511 |
| ENSG0000 | mucosal h | Inflamed | OTOP2     | protein_cc | chr17 | 72920370 | 72930007 | + | 2778 | 1512.286 | 0.02148  | 3.018433 | 0.601069 | 5.021773 | 2.27E-06 | 0.000145 | 0.059609 |
| ENSG0000 | mucosal h | Inflamed | CTDSPL    | protein_cc | chr3  | 37903451 | 38025960 | + | 5796 | 2721.451 | 0        | 0.716778 | 0.142783 | 5.020042 | 2.28E-06 | 0.000145 | 0.060038 |
| ENSG0000 | mucosal h | Inflamed | LCN2      | protein_cc | chr9  | 1.31E+08 | 1.31E+08 | + | 2057 | 31698.69 | 0        | -2.03326 | 0.405046 | -5.01983 | 2.29E-06 | 0.000145 | 0.060091 |
| ENSG0000 | mucosal h | Inflamed | RP11-284F | lincRNA    | chr1  | 1.57E+08 | 1.57E+08 | - | 3222 | 128.9165 | 0.002387 | 0.990794 | 0.197522 | 5.01613  | 2.32E-06 | 0.000147 | 0.06102  |
| ENSG0000 | mucosal h | Inflamed | PLA2G7    | protein_cc | chr6  | 46671938 | 46703430 | - | 2965 | 707.2053 | 0        | -1.01875 | 0.203108 | -5.01581 | 2.32E-06 | 0.000147 | 0.061101 |
| ENSG0000 | mucosal h | Inflamed | KIAA1683  | protein_cc | chr19 | 18367908 | 18385319 | - | 9153 | 357.4773 | 0        | 1.106299 | 0.220627 | 5.014346 | 2.34E-06 | 0.000147 | 0.061473 |
| ENSG0000 | mucosal h | Inflamed | RP11-452I | pseudoger  | chr14 | 52753515 | 52755986 | + | 1949 | 17.47494 | 0.138425 | 1.447635 | 0.288743 | 5.01358  | 2.35E-06 | 0.000148 | 0.061668 |
| ENSG0000 | mucosal h | Inflamed | ADGB      | protein_cc | chr6  | 1.47E+08 | 1.47E+08 | + | 7773 | 7.463007 | 0.205251 | 1.005836 | 0.20066  | 5.012641 | 2.35E-06 | 0.000148 | 0.061909 |
| ENSG0000 | mucosal h | Inflamed | IGHV1-18  | IG_V_gene  | chr14 | 1.07E+08 | 1.07E+08 | - | 410  | 10762.1  | 0        | -1.78944 | 0.357188 | -5.00979 | 2.38E-06 | 0.000149 | 0.062644 |

|          |           |          |           |                  |          |          |   |       |          |          |          |          |          |          |          |          |
|----------|-----------|----------|-----------|------------------|----------|----------|---|-------|----------|----------|----------|----------|----------|----------|----------|----------|
| ENSG0000 | mucosal h | Inflamed | REG1B     | protein_cc chr2  | 79312156 | 79315145 | - | 2384  | 3166.057 | 0.107399 | -4.24208 | 0.847363 | -5.00621 | 2.42E-06 | 0.00015  | 0.06358  |
| ENSG0000 | mucosal h | Inflamed | PLCD1     | protein_cc chr3  | 38048987 | 38071253 | - | 4314  | 2238.666 | 0        | 0.905788 | 0.180944 | 5.005891 | 2.42E-06 | 0.00015  | 0.063664 |
| ENSG0000 | mucosal h | Inflamed | CDHR1     | protein_cc chr10 | 85954410 | 85979377 | + | 6189  | 3671.399 | 0        | 2.551062 | 0.509619 | 5.00582  | 2.42E-06 | 0.00015  | 0.063683 |
| ENSG0000 | mucosal h | Inflamed | DRGX      | protein_cc chr10 | 50572237 | 50603497 | - | 2776  | 23.3747  | 0.231504 | 1.979415 | 0.395437 | 5.005643 | 2.42E-06 | 0.00015  | 0.06373  |
| ENSG0000 | mucosal h | Inflamed | NEDD4L    | protein_cc chr18 | 55711599 | 56068772 | + | 15717 | 4518.776 | 0        | 1.069717 | 0.213703 | 5.005624 | 2.42E-06 | 0.00015  | 0.063735 |
| ENSG0000 | mucosal h | Inflamed | NEB       | protein_cc chr2  | 1.52E+08 | 1.53E+08 | - | 30567 | 23.30072 | 0.040573 | -1.38153 | 0.276025 | -5.00508 | 2.43E-06 | 0.00015  | 0.06388  |
| ENSG0000 | mucosal h | Inflamed | ETV7      | protein_cc chr6  | 36322419 | 36356164 | - | 2369  | 439.21   | 0        | -0.92124 | 0.184101 | -5.004   | 2.44E-06 | 0.00015  | 0.064164 |
| ENSG0000 | mucosal h | Inflamed | IGLC2     | IG_C_gene chr22  | 23243156 | 23243617 | + | 462   | 43261.93 | 0        | -1.85053 | 0.369866 | -5.00326 | 2.45E-06 | 0.00015  | 0.064361 |
| ENSG0000 | mucosal h | Inflamed | IGLV2-8   | IG_V_gene chr22  | 23165153 | 23165787 | + | 520   | 22428.69 | 0        | -1.69797 | 0.339421 | -5.00255 | 2.46E-06 | 0.00015  | 0.064551 |
| ENSG0000 | mucosal h | Inflamed | RAB33A    | protein_cc chrX  | 1.29E+08 | 1.29E+08 | + | 1258  | 31.72315 | 0        | -0.93628 | 0.187217 | -5.00104 | 2.47E-06 | 0.000151 | 0.064954 |
| ENSG0000 | mucosal h | Inflamed | PPARGC1A  | protein_cc chr4  | 23756664 | 23905712 | - | 10511 | 583.7733 | 0        | 1.459478 | 0.291886 | 5.00016  | 2.48E-06 | 0.000151 | 0.065193 |
| ENSG0000 | mucosal h | Inflamed | BCL2A1    | protein_cc chr15 | 80253231 | 80263788 | - | 1089  | 439.747  | 0.002387 | -1.89783 | 0.379653 | -4.99884 | 2.49E-06 | 0.000152 | 0.06555  |
| ENSG0000 | mucosal h | Inflamed | CKB       | protein_cc chr14 | 1.04E+08 | 1.04E+08 | - | 2669  | 26282.63 | 0        | 1.854964 | 0.371111 | 4.998404 | 2.50E-06 | 0.000152 | 0.065668 |
| ENSG0000 | mucosal h | Inflamed | RIMS4     | protein_cc chr20 | 43380449 | 43438979 | - | 5206  | 47.26014 | 0.140811 | 1.746168 | 0.349438 | 4.997079 | 2.51E-06 | 0.000152 | 0.066029 |
| ENSG0000 | mucosal h | Inflamed | ACAT1     | protein_cc chr11 | 1.08E+08 | 1.08E+08 | + | 5584  | 1571.432 | 0        | 0.745065 | 0.149125 | 4.996253 | 2.52E-06 | 0.000152 | 0.066255 |
| ENSG0000 | mucosal h | Inflamed | IGKV2D-25 | IG_V_gene chr2   | 89986322 | 89987079 | + | 390   | 1916.021 | 0        | -1.88801 | 0.377975 | -4.99506 | 2.53E-06 | 0.000153 | 0.066583 |
| ENSG0000 | mucosal h | Inflamed | PCED1B-A' | processed_chr12  | 47599681 | 47610239 | - | 3092  | 402.4391 | 0        | -1.2377  | 0.248064 | -4.98945 | 2.59E-06 | 0.000156 | 0.068145 |
| ENSG0000 | mucosal h | Inflamed | FCAR      | protein_cc chr19 | 55385704 | 55401838 | + | 2366  | 97.68735 | 0.202864 | -2.52864 | 0.506902 | -4.98843 | 2.60E-06 | 0.000156 | 0.068434 |
| ENSG0000 | mucosal h | Inflamed | IL1RN     | protein_cc chr2  | 1.14E+08 | 1.14E+08 | + | 3256  | 3354.305 | 0        | -1.741   | 0.349087 | -4.98729 | 2.62E-06 | 0.000157 | 0.068758 |
| ENSG0000 | mucosal h | Inflamed | DNAJB7    | protein_cc chr22 | 41255553 | 41258130 | - | 2578  | 3.279236 | 0.501193 | 0.848485 | 0.170206 | 4.985052 | 2.64E-06 | 0.000158 | 0.069395 |
| ENSG0000 | mucosal h | Inflamed | CD27      | protein_cc chr12 | 6554033  | 6560884  | + | 1410  | 1430.06  | 0        | -1.33377 | 0.267568 | -4.98481 | 2.64E-06 | 0.000158 | 0.069465 |
| ENSG0000 | mucosal h | Inflamed | KRT6A     | protein_cc chr12 | 52880958 | 52887041 | - | 2928  | 442.5251 | 0.322196 | -3.54105 | 0.711023 | -4.98022 | 2.69E-06 | 0.00016  | 0.070794 |
| ENSG0000 | mucosal h | Inflamed | SLC16A9   | protein_cc chr10 | 61410523 | 61495760 | - | 4425  | 992.8473 | 0        | 1.767333 | 0.354897 | 4.979844 | 2.70E-06 | 0.00016  | 0.070904 |
| ENSG0000 | mucosal h | Inflamed | LAMP5     | protein_cc chr20 | 9495005  | 9511171  | + | 2042  | 97.63962 | 0        | -1.17297 | 0.235606 | -4.97851 | 2.71E-06 | 0.000161 | 0.071295 |
| ENSG0000 | mucosal h | Inflamed | RP11-625L | antisense chr12  | 24983355 | 24989492 | + | 451   | 7.696897 | 0.362768 | -1.42827 | 0.286914 | -4.97805 | 2.72E-06 | 0.000161 | 0.071432 |
| ENSG0000 | mucosal h | Inflamed | PCK1      | protein_cc chr20 | 56136136 | 56141513 | + | 5164  | 4598.964 | 0        | 2.98135  | 0.599121 | 4.976209 | 2.74E-06 | 0.000161 | 0.071977 |
| ENSG0000 | mucosal h | Inflamed | EMR1      | protein_cc chr19 | 6887577  | 6940470  | + | 3707  | 238.568  | 0        | -1.27128 | 0.255604 | -4.97364 | 2.77E-06 | 0.000163 | 0.072744 |
| ENSG0000 | mucosal h | Inflamed | IGLJ1     | IG_J_gene chr22  | 23235872 | 23235998 | + | 127   | 6.570406 | 0.143198 | -0.90618 | 0.182213 | -4.97317 | 2.77E-06 | 0.000163 | 0.072885 |
| ENSG0000 | mucosal h | Inflamed | OLIG1     | protein_cc chr21 | 34442450 | 34444726 | + | 2277  | 35.39618 | 0.0358   | -1.54541 | 0.310878 | -4.97112 | 2.80E-06 | 0.000164 | 0.073504 |
| ENSG0000 | mucosal h | Inflamed | RP11-356C | lincRNA chr14    | 38025363 | 38036300 | - | 532   | 40.26014 | 0.052506 | 1.32122  | 0.265852 | 4.969761 | 2.81E-06 | 0.000164 | 0.073917 |
| ENSG0000 | mucosal h | Inflamed | CD74      | protein_cc chr5  | 1.5E+08  | 1.5E+08  | - | 3184  | 107875.7 | 0        | -0.7849  | 0.157977 | -4.96845 | 2.83E-06 | 0.000165 | 0.074318 |
| ENSG0000 | mucosal h | Inflamed | SRGN      | protein_cc chr10 | 70847862 | 70864567 | + | 1220  | 3288.714 | 0        | -1.29711 | 0.261367 | -4.96278 | 2.89E-06 | 0.000168 | 0.076076 |
| ENSG0000 | mucosal h | Inflamed | KLK10     | protein_cc chr19 | 51515995 | 51523431 | - | 3853  | 1661.446 | 0        | -3.15481 | 0.636268 | -4.95831 | 2.95E-06 | 0.000171 | 0.077491 |
| ENSG0000 | mucosal h | Inflamed | KCNN3     | protein_cc chr1  | 1.55E+08 | 1.55E+08 | - | 13553 | 697.2053 | 0        | -1.2157  | 0.245197 | -4.95807 | 2.95E-06 | 0.000171 | 0.077568 |
| ENSG0000 | mucosal h | Inflamed | CHPF      | protein_cc chr2  | 2.2E+08  | 2.2E+08  | - | 3354  | 4487.754 | 0        | -0.65274 | 0.131677 | -4.95717 | 2.96E-06 | 0.000171 | 0.077856 |
| ENSG0000 | mucosal h | Inflamed | IGKV2-26  | IG_V_pseu chr2   | 89495584 | 89496317 | - | 343   | 31.88305 | 0.047733 | -1.46494 | 0.295641 | -4.95514 | 2.99E-06 | 0.000172 | 0.078509 |
| ENSG0000 | mucosal h | Inflamed | IGLV3-19  | IG_V_gene chr22  | 23063108 | 23063630 | + | 377   | 8891.539 | 0        | -1.74025 | 0.351232 | -4.95471 | 2.99E-06 | 0.000172 | 0.078649 |
| ENSG0000 | mucosal h | Inflamed | COL23A1   | protein_cc chr5  | 1.78E+08 | 1.78E+08 | - | 3878  | 398.6038 | 0        | -1.09302 | 0.220699 | -4.95253 | 3.02E-06 | 0.000173 | 0.079357 |
| ENSG0000 | mucosal h | Inflamed | IGHV1-24  | IG_V_gene chr14  | 1.07E+08 | 1.07E+08 | - | 411   | 3828.16  | 0        | -2.08671 | 0.421525 | -4.95037 | 3.05E-06 | 0.000174 | 0.080066 |
| ENSG0000 | mucosal h | Inflamed | RP11-84C1 | antisense chr14  | 21463996 | 21467322 | - | 1398  | 12.20048 | 0.360382 | 1.178079 | 0.238451 | 4.94054  | 3.17E-06 | 0.000181 | 0.08337  |

|          |           |          |           |            |       |          |          |   |       |          |          |          |          |          |          |          |          |
|----------|-----------|----------|-----------|------------|-------|----------|----------|---|-------|----------|----------|----------|----------|----------|----------|----------|----------|
| ENSG0000 | mucosal h | Inflamed | CSF3R     | protein_cc | chr1  | 36931644 | 36948879 | - | 8426  | 3825.513 | 0        | -2.18439 | 0.442314 | -4.93856 | 3.20E-06 | 0.000182 | 0.084053 |
| ENSG0000 | mucosal h | Inflamed | RP11-678C | lincRNA    | chr19 | 21753624 | 21770124 | - | 1178  | 18.33174 | 0.176611 | 1.342122 | 0.27181  | 4.937717 | 3.21E-06 | 0.000183 | 0.084344 |
| ENSG0000 | mucosal h | Inflamed | SATB2     | protein_cc | chr2  | 2E+08    | 2E+08    | - | 10958 | 4407.969 | 0        | 1.386551 | 0.280857 | 4.936861 | 3.22E-06 | 0.000183 | 0.084641 |
| ENSG0000 | mucosal h | Inflamed | TNFRSF10C | protein_cc | chr8  | 22941868 | 22974950 | + | 2625  | 448.0119 | 0        | -1.90619 | 0.386355 | -4.93378 | 3.26E-06 | 0.000185 | 0.085719 |
| ENSG0000 | mucosal h | Inflamed | THNSL2    | protein_cc | chr2  | 88469835 | 88486146 | + | 6401  | 662.4368 | 0        | 0.717837 | 0.145524 | 4.932763 | 3.27E-06 | 0.000185 | 0.086078 |
| ENSG0000 | mucosal h | Inflamed | TNIP3     | protein_cc | chr4  | 1.22E+08 | 1.22E+08 | - | 3768  | 588.3986 | 0.00716  | -2.68684 | 0.544789 | -4.93189 | 3.29E-06 | 0.000185 | 0.086389 |
| ENSG0000 | mucosal h | Inflamed | ICAM4     | protein_cc | chr19 | 10397643 | 10399198 | + | 1427  | 66.53461 | 0        | -1.14827 | 0.232862 | -4.93113 | 3.30E-06 | 0.000185 | 0.086657 |
| ENSG0000 | mucosal h | Inflamed | RP11-13K1 | lincRNA    | chr17 | 75543022 | 75559325 | + | 5079  | 52.59427 | 0.0358   | 1.709862 | 0.346756 | 4.931017 | 3.30E-06 | 0.000185 | 0.086698 |
| ENSG0000 | mucosal h | Inflamed | IGKV2-18  | IG_V_pseu  | chr2  | 89428207 | 89428966 | - | 343   | 4.498807 | 0.391408 | -1.2468  | 0.252851 | -4.93096 | 3.30E-06 | 0.000185 | 0.086718 |
| ENSG0000 | mucosal h | Inflamed | PDK2      | protein_cc | chr17 | 48172101 | 48189516 | + | 5481  | 1912.814 | 0        | 0.718179 | 0.145657 | 4.930623 | 3.30E-06 | 0.000185 | 0.086839 |
| ENSG0000 | mucosal h | Inflamed | RP5-1091I | antisense  | chrX  | 70403409 | 70418025 | - | 726   | 25.12411 | 0.011933 | -0.90278 | 0.183108 | -4.93032 | 3.31E-06 | 0.000185 | 0.086945 |
| ENSG0000 | mucosal h | Inflamed | RNU6-140  | snRNA      | chr19 | 39287642 | 39287749 | - | 108   | 9.083532 | 0.190931 | 1.123515 | 0.227903 | 4.929783 | 3.31E-06 | 0.000185 | 0.087139 |
| ENSG0000 | mucosal h | Inflamed | RP11-266E | lincRNA    | chr12 | 1.06E+08 | 1.06E+08 | + | 2586  | 6.735084 | 0.403341 | 1.354518 | 0.274884 | 4.927592 | 3.34E-06 | 0.000186 | 0.087926 |
| ENSG0000 | mucosal h | Inflamed | MT1X      | protein_cc | chr16 | 56716336 | 56718108 | + | 1773  | 563.4368 | 0        | 1.035082 | 0.210309 | 4.921731 | 3.43E-06 | 0.00019  | 0.090067 |
| ENSG0000 | mucosal h | Inflamed | CWH43     | protein_cc | chr4  | 48988264 | 49064098 | + | 3138  | 625.0095 | 0.019093 | 2.348965 | 0.477268 | 4.921693 | 3.43E-06 | 0.00019  | 0.090081 |
| ENSG0000 | mucosal h | Inflamed | AC005152  | processed  | chr17 | 70033455 | 70217977 | - | 8450  | 27.60621 | 0.026253 | 1.141387 | 0.231961 | 4.920605 | 3.44E-06 | 0.00019  | 0.090484 |
| ENSG0000 | mucosal h | Inflamed | SELPLG    | protein_cc | chr12 | 1.09E+08 | 1.09E+08 | - | 2843  | 1796.453 | 0        | -1.12594 | 0.228832 | -4.92038 | 3.44E-06 | 0.00019  | 0.090568 |
| ENSG0000 | mucosal h | Inflamed | IL17A     | protein_cc | chr6  | 52051185 | 52055436 | + | 1859  | 51.1432  | 0.143198 | -1.86211 | 0.378466 | -4.92014 | 3.45E-06 | 0.00019  | 0.090657 |
| ENSG0000 | mucosal h | Inflamed | IGKV1D-33 | IG_V_gene  | chr2  | 89952792 | 89953355 | + | 440   | 326.4558 | 0        | -1.62732 | 0.330787 | -4.91954 | 3.46E-06 | 0.00019  | 0.09088  |
| ENSG0000 | mucosal h | Inflamed | SCGB2A1   | protein_cc | chr11 | 61976140 | 61981408 | + | 518   | 62.34368 | 0.023866 | 1.626497 | 0.330675 | 4.918722 | 3.47E-06 | 0.00019  | 0.091186 |
| ENSG0000 | mucosal h | Inflamed | ZC3H12A   | protein_cc | chr1  | 37940153 | 37949980 | + | 3117  | 4171.401 | 0        | -0.97248 | 0.197711 | -4.91871 | 3.47E-06 | 0.00019  | 0.091191 |
| ENSG0000 | mucosal h | Inflamed | RP5-875H  | antisense  | chr17 | 48178068 | 48179284 | - | 430   | 7.866348 | 0.334129 | 1.138402 | 0.231502 | 4.917459 | 3.49E-06 | 0.00019  | 0.09166  |
| ENSG0000 | mucosal h | Inflamed | DOK3      | protein_cc | chr5  | 1.77E+08 | 1.77E+08 | - | 4821  | 1724.079 | 0        | -1.21296 | 0.246678 | -4.9172  | 3.49E-06 | 0.00019  | 0.091758 |
| ENSG0000 | mucosal h | Inflamed | DOK2      | protein_cc | chr8  | 21766384 | 21771371 | - | 2211  | 823.8043 | 0        | -0.83408 | 0.169706 | -4.91488 | 3.52E-06 | 0.000191 | 0.092632 |
| ENSG0000 | mucosal h | Inflamed | CD79A     | protein_cc | chr19 | 42381190 | 42385439 | + | 1503  | 4882.124 | 0        | -1.56536 | 0.318594 | -4.91333 | 3.55E-06 | 0.000192 | 0.093224 |
| ENSG0000 | mucosal h | Inflamed | CR1       | protein_cc | chr1  | 2.08E+08 | 2.08E+08 | + | 12164 | 568.1265 | 0        | -1.60001 | 0.325964 | -4.90854 | 3.62E-06 | 0.000195 | 0.095072 |
| ENSG0000 | mucosal h | Inflamed | KRT80     | protein_cc | chr12 | 52562780 | 52585784 | - | 4350  | 142.3675 | 0.009547 | -1.84043 | 0.374966 | -4.90827 | 3.62E-06 | 0.000195 | 0.095179 |
| ENSG0000 | mucosal h | Inflamed | C9orf40   | protein_cc | chr9  | 77561497 | 77567802 | - | 2327  | 474.9809 | 0        | 0.562736 | 0.114674 | 4.907261 | 3.64E-06 | 0.000196 | 0.095573 |
| ENSG0000 | mucosal h | Inflamed | NCF4      | protein_cc | chr22 | 37257030 | 37274057 | + | 1759  | 1365.578 | 0        | -0.84381 | 0.172025 | -4.90514 | 3.67E-06 | 0.000196 | 0.096407 |
| ENSG0000 | mucosal h | Inflamed | MT-TF     | Mt_tRNA    | chrM  | 577      | 647      | + | 71    | 278.9666 | 0        | 1.254955 | 0.255905 | 4.903991 | 3.68E-06 | 0.000196 | 0.096862 |
| ENSG0000 | mucosal h | Inflamed | FAM163B   | protein_cc | chr9  | 1.36E+08 | 1.36E+08 | - | 811   | 14.49165 | 0.357995 | 1.742911 | 0.355439 | 4.903549 | 3.69E-06 | 0.000196 | 0.097037 |
| ENSG0000 | mucosal h | Inflamed | PROC      | protein_cc | chr2  | 1.28E+08 | 1.28E+08 | + | 2495  | 32.54415 | 0.011933 | 1.001806 | 0.204307 | 4.903429 | 3.69E-06 | 0.000196 | 0.097085 |
| ENSG0000 | mucosal h | Inflamed | PANX2     | protein_cc | chr22 | 50609160 | 50618723 | + | 3102  | 44.45585 | 0.042959 | -1.63063 | 0.332552 | -4.90338 | 3.69E-06 | 0.000196 | 0.097106 |
| ENSG0000 | mucosal h | Inflamed | RND1      | protein_cc | chr12 | 49250928 | 49259681 | - | 3099  | 411.1241 | 0.002387 | -1.24658 | 0.254239 | -4.90317 | 3.70E-06 | 0.000196 | 0.097188 |
| ENSG0000 | mucosal h | Inflamed | CA1       | protein_cc | chr8  | 86239837 | 86291243 | - | 4068  | 13359.33 | 0.004773 | 3.159717 | 0.644425 | 4.903159 | 3.70E-06 | 0.000196 | 0.097192 |
| ENSG0000 | mucosal h | Inflamed | PI3       | protein_cc | chr20 | 43803517 | 43805185 | + | 577   | 16065.03 | 0        | -1.9735  | 0.402536 | -4.90267 | 3.70E-06 | 0.000196 | 0.097387 |
| ENSG0000 | mucosal h | Inflamed | CD53      | protein_cc | chr1  | 1.11E+08 | 1.11E+08 | + | 2081  | 2379.532 | 0        | -1.04453 | 0.213062 | -4.90247 | 3.71E-06 | 0.000196 | 0.097465 |
| ENSG0000 | mucosal h | Inflamed | BASP1     | protein_cc | chr5  | 17065707 | 17276943 | + | 2133  | 1786.964 | 0        | -1.40207 | 0.286002 | -4.90232 | 3.71E-06 | 0.000196 | 0.097526 |
| ENSG0000 | mucosal h | Inflamed | C1QTNF1-1 | protein_cc | chr17 | 77015291 | 77023737 | - | 966   | 7.563246 | 0.307876 | 1.134024 | 0.231357 | 4.901618 | 3.72E-06 | 0.000196 | 0.097807 |
| ENSG0000 | mucosal h | Inflamed | CD72      | protein_cc | chr9  | 35609530 | 35646807 | - | 3374  | 322.3031 | 0        | -1.26631 | 0.258375 | -4.90104 | 3.73E-06 | 0.000196 | 0.098038 |



|          |           |          |           |            |       |          |          |   |       |          |          |          |          |          |          |          |          |
|----------|-----------|----------|-----------|------------|-------|----------|----------|---|-------|----------|----------|----------|----------|----------|----------|----------|----------|
| ENSG0000 | mucosal h | Inflamed | TMEM163   | protein_cc | chr2  | 1.35E+08 | 1.35E+08 | - | 6804  | 173.3461 | 0.011933 | -1.87529 | 0.382713 | -4.9     | 3.75E-06 | 0.000197 | 0.098459 |
| ENSG0000 | mucosal h | Inflamed | RP11-567C | lincRNA    | chr12 | 90501516 | 90506556 | + | 926   | 12.21002 | 0.174224 | 1.329019 | 0.271575 | 4.893751 | 3.84E-06 | 0.000201 | 0.101008 |
| ENSG0000 | mucosal h | Inflamed | MAD2L2    | protein_cc | chr1  | 11734537 | 11751707 | - | 3324  | 449.9475 | 0        | -0.80186 | 0.163949 | -4.89089 | 3.89E-06 | 0.000203 | 0.102196 |
| ENSG0000 | mucosal h | Inflamed | MYL5      | protein_cc | chr4  | 667369   | 675822   | + | 4305  | 362.1337 | 0        | 0.633497 | 0.129564 | 4.889451 | 3.91E-06 | 0.000204 | 0.1028   |
| ENSG0000 | mucosal h | Inflamed | SSTR3     | protein_cc | chr22 | 37600278 | 37608362 | - | 4520  | 59.72554 | 0.002387 | -1.35147 | 0.27643  | -4.88901 | 3.92E-06 | 0.000204 | 0.102986 |
| ENSG0000 | mucosal h | Inflamed | IGHV3-74  | IG_V_gene  | chr14 | 1.07E+08 | 1.07E+08 | - | 587   | 8907.32  | 0        | -1.67007 | 0.341667 | -4.88802 | 3.93E-06 | 0.000204 | 0.103404 |
| ENSG0000 | mucosal h | Inflamed | HSBP1L1   | protein_cc | chr18 | 77724561 | 77730822 | + | 2056  | 898.315  | 0        | 0.732251 | 0.149846 | 4.8867   | 3.95E-06 | 0.000205 | 0.103963 |
| ENSG0000 | mucosal h | Inflamed | RP11-855C | lincRNA    | chr11 | 61355966 | 61375022 | + | 2349  | 13.65155 | 0.169451 | 1.476939 | 0.302355 | 4.884783 | 3.99E-06 | 0.000206 | 0.10478  |
| ENSG0000 | mucosal h | Inflamed | CCDC163P  | protein_cc | chr1  | 45959538 | 45965751 | - | 2757  | 157.2315 | 0        | -0.8722  | 0.178579 | -4.88411 | 4.00E-06 | 0.000206 | 0.105071 |
| ENSG0000 | mucosal h | Inflamed | LRRN2     | protein_cc | chr1  | 2.05E+08 | 2.05E+08 | - | 5681  | 610.3294 | 0        | 1.584861 | 0.324755 | 4.880176 | 4.06E-06 | 0.000209 | 0.106771 |
| ENSG0000 | mucosal h | Inflamed | IGLVI-70  | IG_V_pseu  | chr22 | 22380474 | 22380991 | + | 390   | 215.6516 | 0.02148  | -1.77136 | 0.363623 | -4.87143 | 4.21E-06 | 0.000217 | 0.110652 |
| ENSG0000 | mucosal h | Inflamed | SDF2L1    | protein_cc | chr22 | 21996550 | 21998587 | + | 1099  | 1467.002 | 0        | -0.7317  | 0.150246 | -4.87006 | 4.23E-06 | 0.000217 | 0.111273 |
| ENSG0000 | mucosal h | Inflamed | LAG3      | protein_cc | chr12 | 6881678  | 6887621  | + | 3056  | 565.4916 | 0        | -1.08967 | 0.223788 | -4.86919 | 4.25E-06 | 0.000218 | 0.111669 |
| ENSG0000 | mucosal h | Inflamed | TRIM55    | protein_cc | chr8  | 67039131 | 67087720 | + | 3079  | 9.477327 | 0.133652 | -1.2873  | 0.264465 | -4.86757 | 4.28E-06 | 0.000219 | 0.112409 |
| ENSG0000 | mucosal h | Inflamed | ARHGDI8   | protein_cc | chr12 | 15094951 | 15114662 | - | 2102  | 4927.458 | 0        | -0.90075 | 0.185203 | -4.86356 | 4.35E-06 | 0.000222 | 0.114264 |
| ENSG0000 | mucosal h | Inflamed | CHST12    | protein_cc | chr7  | 2443223  | 2474242  | + | 2211  | 678.0048 | 0        | -0.69891 | 0.143726 | -4.86277 | 4.36E-06 | 0.000222 | 0.114631 |
| ENSG0000 | mucosal h | Inflamed | VSTM1     | protein_cc | chr19 | 54544079 | 54567207 | - | 1238  | 27.05728 | 0.052506 | -1.4511  | 0.298677 | -4.85841 | 4.44E-06 | 0.000226 | 0.116688 |
| ENSG0000 | mucosal h | Inflamed | ZDHHC8P1  | pseudoger  | chr22 | 23732793 | 23744913 | - | 3269  | 68.44391 | 0.01432  | 1.508917 | 0.310808 | 4.854821 | 4.50E-06 | 0.000229 | 0.118405 |
| ENSG0000 | mucosal h | Inflamed | IGLV2-23  | IG_V_gene  | chr22 | 23040274 | 23040892 | + | 502   | 16239.5  | 0        | -1.72507 | 0.355405 | -4.8538  | 4.52E-06 | 0.000229 | 0.118899 |
| ENSG0000 | mucosal h | Inflamed | IGKV1OR2  | IG_V_gene  | chr2  | 1.14E+08 | 1.14E+08 | + | 390   | 47.05251 | 0.038186 | -1.65441 | 0.340865 | -4.85358 | 4.53E-06 | 0.000229 | 0.119006 |
| ENSG0000 | mucosal h | Inflamed | VWA5B1    | protein_cc | chr1  | 20617412 | 20681387 | + | 6377  | 12.77804 | 0.212411 | 1.191749 | 0.245616 | 4.852079 | 4.55E-06 | 0.00023  | 0.119735 |
| ENSG0000 | mucosal h | Inflamed | NLRP7     | protein_cc | chr19 | 55434877 | 55477680 | - | 3914  | 52.89976 | 0.004773 | -1.48385 | 0.305863 | -4.85135 | 4.57E-06 | 0.00023  | 0.12009  |
| ENSG0000 | mucosal h | Inflamed | RP13-314C | antisense  | chrX  | 23791109 | 23801073 | - | 672   | 6.143198 | 0.212411 | -1.01442 | 0.209137 | -4.85053 | 4.58E-06 | 0.00023  | 0.120495 |
| ENSG0000 | mucosal h | Inflamed | ENTPD5    | protein_cc | chr14 | 74424713 | 74486102 | - | 10379 | 7916.606 | 0        | 1.329605 | 0.274157 | 4.849792 | 4.60E-06 | 0.00023  | 0.120855 |
| ENSG0000 | mucosal h | Inflamed | STOM      | protein_cc | chr9  | 1.24E+08 | 1.24E+08 | - | 3188  | 5881.737 | 0        | -0.91133 | 0.187915 | -4.84971 | 4.60E-06 | 0.00023  | 0.120893 |
| ENSG0000 | mucosal h | Inflamed | CTD-2132I | sense_intr | chr17 | 40192731 | 40195135 | - | 761   | 23.76611 | 0.038186 | 1.100838 | 0.227072 | 4.847972 | 4.63E-06 | 0.000231 | 0.121754 |
| ENSG0000 | mucosal h | Inflamed | FAM83A    | protein_cc | chr8  | 1.24E+08 | 1.24E+08 | + | 6312  | 278.8091 | 0.016706 | -1.88879 | 0.38986  | -4.84479 | 4.69E-06 | 0.000234 | 0.123339 |
| ENSG0000 | mucosal h | Inflamed | DUOX2     | protein_cc | chr15 | 45384848 | 45406542 | - | 9834  | 52840.97 | 0        | -2.31247 | 0.477617 | -4.84167 | 4.75E-06 | 0.000237 | 0.124914 |
| ENSG0000 | mucosal h | Inflamed | GPR125    | protein_cc | chr4  | 22346694 | 22517677 | - | 9241  | 1957.649 | 0        | 0.85481  | 0.176572 | 4.841148 | 4.76E-06 | 0.000237 | 0.125182 |
| ENSG0000 | mucosal h | Inflamed | NTRK2     | protein_cc | chr9  | 87283466 | 87638505 | + | 16968 | 400.6921 | 0.011933 | 2.135152 | 0.441311 | 4.838201 | 4.82E-06 | 0.000239 | 0.126691 |
| ENSG0000 | mucosal h | Inflamed | NCF1      | protein_cc | chr7  | 74188309 | 74203659 | + | 3462  | 712.105  | 0        | -1.14848 | 0.237486 | -4.83599 | 4.86E-06 | 0.00024  | 0.127835 |
| ENSG0000 | mucosal h | Inflamed | APOBEC3F  | protein_cc | chr22 | 39436609 | 39449915 | + | 3242  | 225.4033 | 0        | -0.74302 | 0.153656 | -4.83559 | 4.87E-06 | 0.00024  | 0.128044 |
| ENSG0000 | mucosal h | Inflamed | IGKV1D-1E | IG_V_gene  | chr2  | 90139078 | 90139580 | + | 378   | 825.9021 | 0.002387 | -1.79798 | 0.37184  | -4.83536 | 4.87E-06 | 0.00024  | 0.12816  |
| ENSG0000 | mucosal h | Inflamed | TSHR      | protein_cc | chr14 | 81421333 | 81612646 | + | 5519  | 40.24582 | 0.01432  | -1.27463 | 0.263612 | -4.83525 | 4.88E-06 | 0.00024  | 0.128219 |
| ENSG0000 | mucosal h | Inflamed | THEMIS2   | protein_cc | chr1  | 28199055 | 28213196 | + | 4620  | 2307.726 | 0        | -1.05895 | 0.219098 | -4.83323 | 4.92E-06 | 0.000241 | 0.129279 |
| ENSG0000 | mucosal h | Inflamed | HLA-DRA   | protein_cc | chr6  | 32407619 | 32412823 | + | 1280  | 23569.27 | 0        | -0.86123 | 0.178198 | -4.83302 | 4.92E-06 | 0.000241 | 0.129387 |
| ENSG0000 | mucosal h | Inflamed | MMP12     | processed  | chr11 | 1.03E+08 | 1.03E+08 | - | 1879  | 3511.969 | 0        | -1.64236 | 0.339888 | -4.83207 | 4.94E-06 | 0.000242 | 0.129887 |
| ENSG0000 | mucosal h | Inflamed | IGLV1-50  | IG_V_gene  | chr22 | 22681658 | 22682172 | + | 405   | 23.31026 | 0.038186 | -1.52911 | 0.316485 | -4.83156 | 4.95E-06 | 0.000242 | 0.130159 |
| ENSG0000 | mucosal h | Inflamed | RIMKLA    | protein_cc | chr1  | 42846466 | 42888249 | + | 8981  | 735.8401 | 0        | 1.337811 | 0.276904 | 4.831322 | 4.96E-06 | 0.000242 | 0.130283 |
| ENSG0000 | mucosal h | Inflamed | HEY2      | protein_cc | chr6  | 1.26E+08 | 1.26E+08 | + | 2741  | 56.81146 | 0.004773 | -0.99498 | 0.206116 | -4.82729 | 5.04E-06 | 0.000245 | 0.132432 |

|          |           |          |           |            |       |          |          |   |      |          |          |          |          |          |          |          |          |
|----------|-----------|----------|-----------|------------|-------|----------|----------|---|------|----------|----------|----------|----------|----------|----------|----------|----------|
| ENSG0000 | mucosal h | Inflamed | WARS      | protein_cc | chr14 | 1.01E+08 | 1.01E+08 | - | 6358 | 13094.11 | 0        | -0.97771 | 0.20263  | -4.82511 | 5.08E-06 | 0.000247 | 0.133611 |
| ENSG0000 | mucosal h | Inflamed | IGHV5-51  | IG_V_gene  | chr14 | 1.07E+08 | 1.07E+08 | - | 410  | 11849.12 | 0        | -1.57637 | 0.326715 | -4.82492 | 5.09E-06 | 0.000247 | 0.133713 |
| ENSG0000 | mucosal h | Inflamed | MAOA      | protein_cc | chrX  | 43515467 | 43606068 | + | 4213 | 7999.68  | 0        | 1.261676 | 0.261598 | 4.822961 | 5.13E-06 | 0.000248 | 0.134781 |
| ENSG0000 | mucosal h | Inflamed | CCM2      | protein_cc | chr7  | 45039074 | 45116068 | + | 8196 | 2144.086 | 0        | -0.39311 | 0.081515 | -4.82258 | 5.13E-06 | 0.000248 | 0.13499  |
| ENSG0000 | mucosal h | Inflamed | IGKV1D-8  | IG_V_gene  | chr2  | 90259593 | 90260248 | + | 532  | 108.8425 | 0.011933 | -1.73571 | 0.359961 | -4.82195 | 5.15E-06 | 0.000248 | 0.135336 |
| ENSG0000 | mucosal h | Inflamed | USP30     | protein_cc | chr12 | 1.09E+08 | 1.1E+08  | + | 5135 | 771.4726 | 0        | 0.635374 | 0.131813 | 4.820287 | 5.18E-06 | 0.00025  | 0.136252 |
| ENSG0000 | mucosal h | Inflamed | RP11-120k | lincRNA    | chr13 | 1.14E+08 | 1.14E+08 | - | 1297 | 32.32458 | 0.02864  | 1.159604 | 0.240593 | 4.819778 | 5.19E-06 | 0.00025  | 0.136534 |
| ENSG0000 | mucosal h | Inflamed | IGKV1D-27 | IG_V_pseu  | chr2  | 90007677 | 90008154 | + | 354  | 261.7733 | 0.002387 | -1.7033  | 0.353467 | -4.81884 | 5.21E-06 | 0.00025  | 0.137052 |
| ENSG0000 | mucosal h | Inflamed | BGN       | protein_cc | chrX  | 1.53E+08 | 1.53E+08 | + | 2453 | 4698.866 | 0        | -1.53689 | 0.319034 | -4.81732 | 5.25E-06 | 0.000251 | 0.137903 |
| ENSG0000 | mucosal h | Inflamed | NEURL     | protein_cc | chr10 | 1.05E+08 | 1.05E+08 | + | 4961 | 1625.189 | 0        | 1.29537  | 0.269023 | 4.815082 | 5.29E-06 | 0.000253 | 0.139159 |
| ENSG0000 | mucosal h | Inflamed | STRIP2    | protein_cc | chr7  | 1.29E+08 | 1.29E+08 | + | 5876 | 388.9857 | 0.002387 | -1.51241 | 0.31416  | -4.81415 | 5.31E-06 | 0.000254 | 0.139688 |
| ENSG0000 | mucosal h | Inflamed | IGHV1OR1  | IG_V_gene  | chr15 | 22448382 | 22448819 | - | 353  | 131.7255 | 0        | -1.31195 | 0.272665 | -4.81158 | 5.37E-06 | 0.000256 | 0.14115  |
| ENSG0000 | mucosal h | Inflamed | RP4-6591l | pseudoger  | chr1  | 2.33E+08 | 2.33E+08 | + | 784  | 6.307876 | 0.415274 | 0.969035 | 0.20141  | 4.811265 | 5.38E-06 | 0.000256 | 0.141329 |
| ENSG0000 | mucosal h | Inflamed | IGKV1-8   | IG_V_gene  | chr2  | 89291928 | 89292450 | - | 398  | 498.9905 | 0.002387 | -1.91659 | 0.398674 | -4.80743 | 5.46E-06 | 0.000259 | 0.143545 |
| ENSG0000 | mucosal h | Inflamed | DIO3OS    | lincRNA    | chr14 | 1.02E+08 | 1.02E+08 | - | 5603 | 412.179  | 0        | 1.155478 | 0.240526 | 4.803964 | 5.54E-06 | 0.000262 | 0.145572 |
| ENSG0000 | mucosal h | Inflamed | RP11-545f | pseudoger  | chr1  | 1.8E+08  | 1.8E+08  | + | 2471 | 8.844869 | 0.116945 | 0.955915 | 0.199234 | 4.797958 | 5.67E-06 | 0.000268 | 0.149155 |
| ENSG0000 | mucosal h | Inflamed | CTD-2306f | lincRNA    | chr5  | 66475441 | 66476415 | - | 975  | 31.23389 | 0.01432  | -1.09439 | 0.228123 | -4.79738 | 5.69E-06 | 0.000268 | 0.149504 |
| ENSG0000 | mucosal h | Inflamed | KRT7      | protein_cc | chr12 | 52626304 | 52645970 | + | 4093 | 423.9618 | 0.002387 | -2.22748 | 0.464376 | -4.79673 | 5.70E-06 | 0.000269 | 0.1499   |
| ENSG0000 | mucosal h | Inflamed | FOSL1     | protein_cc | chr11 | 65659520 | 65668044 | - | 1887 | 335.6181 | 0.011933 | -1.95897 | 0.408635 | -4.79392 | 5.77E-06 | 0.000271 | 0.15161  |
| ENSG0000 | mucosal h | Inflamed | C1R       | protein_cc | chr12 | 7187513  | 7245203  | - | 4696 | 7865.148 | 0        | -1.08894 | 0.227155 | -4.7938  | 5.77E-06 | 0.000271 | 0.151687 |
| ENSG0000 | mucosal h | Inflamed | TAS1R3    | protein_cc | chr1  | 1266694  | 1270686  | + | 3433 | 382.4224 | 0        | -1.4436  | 0.301355 | -4.79037 | 5.85E-06 | 0.000273 | 0.153806 |
| ENSG0000 | mucosal h | Inflamed | NCF2      | protein_cc | chr1  | 1.84E+08 | 1.84E+08 | - | 2928 | 1259.494 | 0        | -1.29265 | 0.269856 | -4.79014 | 5.86E-06 | 0.000273 | 0.153949 |
| ENSG0000 | mucosal h | Inflamed | IDO1      | protein_cc | chr8  | 39759794 | 39785963 | + | 3261 | 1476.635 | 0        | -2.22813 | 0.465178 | -4.78984 | 5.86E-06 | 0.000273 | 0.154136 |
| ENSG0000 | mucosal h | Inflamed | AGT       | protein_cc | chr1  | 2.31E+08 | 2.31E+08 | - | 2291 | 1061.215 | 0        | -1.40115 | 0.292536 | -4.78966 | 5.87E-06 | 0.000273 | 0.154248 |
| ENSG0000 | mucosal h | Inflamed | GPR84     | protein_cc | chr12 | 54756229 | 54758271 | - | 2043 | 132.6778 | 0.002387 | -1.8616  | 0.388832 | -4.78769 | 5.91E-06 | 0.000275 | 0.155481 |
| ENSG0000 | mucosal h | Inflamed | TRIM69    | protein_cc | chr15 | 45021186 | 45060027 | + | 9237 | 1773.785 | 0        | -0.66928 | 0.139793 | -4.78765 | 5.92E-06 | 0.000275 | 0.155506 |
| ENSG0000 | mucosal h | Inflamed | IGHA1     | IG_C_gene  | chr14 | 1.06E+08 | 1.06E+08 | - | 1110 | 767809.4 | 0        | -1.40682 | 0.294037 | -4.78449 | 5.99E-06 | 0.000277 | 0.157502 |
| ENSG0000 | mucosal h | Inflamed | TMEM63C   | protein_cc | chr14 | 77582911 | 77725838 | + | 6363 | 386.6134 | 0.004773 | 1.424266 | 0.29771  | 4.784066 | 6.00E-06 | 0.000277 | 0.157774 |
| ENSG0000 | mucosal h | Inflamed | FAM3B     | protein_cc | chr21 | 42676139 | 42729358 | + | 3599 | 409.7375 | 0.038186 | -2.24917 | 0.470157 | -4.78387 | 6.01E-06 | 0.000277 | 0.157899 |
| ENSG0000 | mucosal h | Inflamed | SLC26A6   | protein_cc | chr3  | 48663156 | 48672926 | - | 6373 | 3176.695 | 0        | 0.636862 | 0.13313  | 4.783748 | 6.01E-06 | 0.000277 | 0.157977 |
| ENSG0000 | mucosal h | Inflamed | EHD3      | protein_cc | chr2  | 31456880 | 31492313 | + | 4959 | 729.7136 | 0        | -1.05072 | 0.219762 | -4.7812  | 6.07E-06 | 0.00028  | 0.159614 |
| ENSG0000 | mucosal h | Inflamed | ENDOD1    | protein_cc | chr11 | 94822974 | 94865809 | + | 4687 | 3218.8   | 0        | 1.035343 | 0.216677 | 4.778289 | 6.14E-06 | 0.000282 | 0.161499 |
| ENSG0000 | mucosal h | Inflamed | RP3-4770c | antisense  | chr20 | 34064028 | 34078808 | - | 839  | 25.50358 | 0.002387 | -0.91965 | 0.19248  | -4.77789 | 6.15E-06 | 0.000282 | 0.161762 |
| ENSG0000 | mucosal h | Inflamed | AC073283  | lincRNA    | chr2  | 47419544 | 47572213 | - | 3552 | 60.63723 | 0.004773 | 1.034461 | 0.216519 | 4.777684 | 6.16E-06 | 0.000282 | 0.161894 |
| ENSG0000 | mucosal h | Inflamed | SASH3     | protein_cc | chrX  | 1.29E+08 | 1.29E+08 | + | 2711 | 2292.246 | 0        | -0.94617 | 0.198104 | -4.7761  | 6.20E-06 | 0.000283 | 0.16293  |
| ENSG0000 | mucosal h | Inflamed | SLC13A2   | protein_cc | chr17 | 26800311 | 26824799 | + | 3226 | 577.8687 | 0.0358   | 2.58657  | 0.541649 | 4.775366 | 6.22E-06 | 0.000284 | 0.163416 |
| ENSG0000 | mucosal h | Inflamed | VIPR1     | protein_cc | chr3  | 42530791 | 42579059 | + | 7378 | 4176.878 | 0        | 1.521193 | 0.318825 | 4.771245 | 6.32E-06 | 0.000288 | 0.166156 |
| ENSG0000 | mucosal h | Inflamed | CACNG6    | protein_cc | chr19 | 54495542 | 54515923 | + | 1853 | 7.78043  | 0.188544 | -1.12565 | 0.235988 | -4.76994 | 6.35E-06 | 0.000289 | 0.167036 |
| ENSG0000 | mucosal h | Inflamed | CTB-61M7  | lincRNA    | chr19 | 55402039 | 55402786 | + | 748  | 32.65632 | 0.312649 | -2.08815 | 0.437801 | -4.76963 | 6.36E-06 | 0.000289 | 0.167242 |
| ENSG0000 | mucosal h | Inflamed | PPIAP30   | pseudoger  | chr10 | 15196801 | 15197319 | - | 519  | 1.336516 | 0.656325 | 0.5107   | 0.107079 | 4.76938  | 6.37E-06 | 0.000289 | 0.167411 |

|          |           |          |           |            |       |          |          |   |       |          |          |          |          |          |          |          |          |
|----------|-----------|----------|-----------|------------|-------|----------|----------|---|-------|----------|----------|----------|----------|----------|----------|----------|----------|
| ENSG0000 | mucosal h | Inflamed | EXPH5     | protein_cc | chr11 | 1.08E+08 | 1.08E+08 | - | 10843 | 616.2243 | 0.002387 | 1.840133 | 0.385956 | 4.76773  | 6.41E-06 | 0.00029  | 0.168529 |
| ENSG0000 | mucosal h | Inflamed | HEPACAM   | protein_cc | chr7  | 92817899 | 92855837 | - | 2483  | 1672.499 | 0.002387 | 1.820516 | 0.382123 | 4.764214 | 6.50E-06 | 0.000294 | 0.170935 |
| ENSG0000 | mucosal h | Inflamed | DDIT4     | protein_cc | chr10 | 74033678 | 74035794 | + | 2058  | 2590.625 | 0        | -0.82816 | 0.173854 | -4.76353 | 6.52E-06 | 0.000294 | 0.171408 |
| ENSG0000 | mucosal h | Inflamed | IL23A     | protein_cc | chr12 | 56732663 | 56734193 | + | 1041  | 58.35322 | 0.019093 | -1.68098 | 0.352984 | -4.76219 | 6.56E-06 | 0.000295 | 0.172339 |
| ENSG0000 | mucosal h | Inflamed | PCED1B    | protein_cc | chr12 | 47473386 | 47630443 | + | 2616  | 428.3938 | 0        | -1.01223 | 0.212608 | -4.76101 | 6.59E-06 | 0.000296 | 0.173158 |
| ENSG0000 | mucosal h | Inflamed | CAMK2N1   | protein_cc | chr1  | 20808884 | 20812713 | - | 2615  | 5970.329 | 0        | 0.885999 | 0.18613  | 4.760108 | 6.61E-06 | 0.000297 | 0.173787 |
| ENSG0000 | mucosal h | Inflamed | RP11-689E | antisense  | chr12 | 1.09E+08 | 1.09E+08 | + | 859   | 31.35322 | 0.02864  | -1.30397 | 0.274128 | -4.75679 | 6.70E-06 | 0.0003   | 0.176124 |
| ENSG0000 | mucosal h | Inflamed | CTB-43E15 | lincRNA    | chr5  | 1.73E+08 | 1.73E+08 | - | 2815  | 41.52029 | 0.085919 | -1.77652 | 0.373493 | -4.75651 | 6.71E-06 | 0.0003   | 0.176328 |
| ENSG0000 | mucosal h | Inflamed | FOXP3     | protein_cc | chrX  | 49106897 | 49121288 | - | 2578  | 275.9093 | 0.002387 | -1.31192 | 0.275878 | -4.75542 | 6.74E-06 | 0.000301 | 0.177104 |
| ENSG0000 | mucosal h | Inflamed | CD79B     | protein_cc | chr17 | 62006100 | 62009714 | - | 2080  | 637.7757 | 0.002387 | -1.59762 | 0.336082 | -4.75367 | 6.78E-06 | 0.000302 | 0.178354 |
| ENSG0000 | mucosal h | Inflamed | SLAMF8    | protein_cc | chr1  | 1.6E+08  | 1.6E+08  | + | 2996  | 1442.093 | 0        | -0.87849 | 0.18481  | -4.75349 | 6.79E-06 | 0.000302 | 0.178481 |
| ENSG0000 | mucosal h | Inflamed | ZBED2     | protein_cc | chr3  | 1.11E+08 | 1.11E+08 | - | 2311  | 41.57757 | 0.136038 | -1.76859 | 0.372239 | -4.75123 | 6.85E-06 | 0.000304 | 0.180116 |
| ENSG0000 | mucosal h | Inflamed | FAM20A    | protein_cc | chr17 | 66531254 | 66597530 | - | 6203  | 504.2124 | 0        | -1.45498 | 0.306242 | -4.75107 | 6.86E-06 | 0.000304 | 0.18023  |
| ENSG0000 | mucosal h | Inflamed | POU2F2    | protein_cc | chr19 | 42590263 | 42700737 | - | 8899  | 1511.888 | 0        | -1.31331 | 0.276497 | -4.74979 | 6.89E-06 | 0.000305 | 0.181157 |
| ENSG0000 | mucosal h | Inflamed | CXCL2     | protein_cc | chr4  | 74962752 | 74965010 | - | 1500  | 829.9189 | 0.002387 | -1.72949 | 0.364156 | -4.74932 | 6.90E-06 | 0.000305 | 0.181504 |
| ENSG0000 | mucosal h | Inflamed | IGHV3-30  | IG_V_gene  | chr14 | 1.07E+08 | 1.07E+08 | - | 431   | 9577.516 | 0        | -1.76819 | 0.372391 | -4.7482  | 6.93E-06 | 0.000306 | 0.18232  |
| ENSG0000 | mucosal h | Inflamed | SATB2-AS1 | antisense  | chr2  | 2E+08    | 2E+08    | + | 4470  | 828.9427 | 0.004773 | 2.130254 | 0.44873  | 4.747299 | 6.96E-06 | 0.000307 | 0.182985 |
| ENSG0000 | mucosal h | Inflamed | ARHGAP3   | protein_cc | chrX  | 1.3E+08  | 1.3E+08  | + | 3173  | 3.658711 | 0.498807 | 0.8695   | 0.183219 | 4.745682 | 7.01E-06 | 0.000308 | 0.184179 |
| ENSG0000 | mucosal h | Inflamed | CDC42EP2  | protein_cc | chr11 | 65082289 | 65089900 | + | 2452  | 1030.389 | 0        | -0.80363 | 0.169364 | -4.74501 | 7.02E-06 | 0.000308 | 0.184674 |
| ENSG0000 | mucosal h | Inflamed | LMO2      | protein_cc | chr11 | 33880122 | 33913836 | - | 3109  | 576.3365 | 0        | -0.84703 | 0.178722 | -4.73938 | 7.19E-06 | 0.000315 | 0.188907 |
| ENSG0000 | mucosal h | Inflamed | RP11-77E1 | lincRNA    | chr9  | 7786105  | 7786688  | - | 584   | 3.968974 | 0.25537  | 0.77551  | 0.163642 | 4.739051 | 7.19E-06 | 0.000315 | 0.189156 |
| ENSG0000 | mucosal h | Inflamed | SPNS3     | protein_cc | chr17 | 4336983  | 4391503  | + | 2684  | 70.57518 | 0        | -0.76109 | 0.160608 | -4.73881 | 7.20E-06 | 0.000315 | 0.189337 |
| ENSG0000 | mucosal h | Inflamed | IL26      | protein_cc | chr12 | 68595131 | 68619601 | - | 1075  | 9.575179 | 0.23389  | -1.16012 | 0.244842 | -4.73823 | 7.22E-06 | 0.000315 | 0.189778 |
| ENSG0000 | mucosal h | Inflamed | MBNL1-AS  | antisense  | chr3  | 1.52E+08 | 1.52E+08 | - | 6585  | 188.9236 | 0        | 0.606174 | 0.12794  | 4.737968 | 7.23E-06 | 0.000315 | 0.189981 |
| ENSG0000 | mucosal h | Inflamed | SIGLEC10  | protein_cc | chr19 | 51913275 | 51921057 | - | 3667  | 1314.695 | 0        | -0.87872 | 0.185502 | -4.73699 | 7.25E-06 | 0.000315 | 0.190729 |
| ENSG0000 | mucosal h | Inflamed | KSR2      | protein_cc | chr12 | 1.18E+08 | 1.18E+08 | - | 18298 | 198.9117 | 0.002387 | 1.386504 | 0.292783 | 4.735602 | 7.30E-06 | 0.000316 | 0.191796 |
| ENSG0000 | mucosal h | Inflamed | LAX1      | protein_cc | chr1  | 2.04E+08 | 2.04E+08 | + | 3198  | 962.6539 | 0        | -1.53624 | 0.324422 | -4.73532 | 7.30E-06 | 0.000316 | 0.192011 |
| ENSG0000 | mucosal h | Inflamed | CCL4      | protein_cc | chr17 | 34430983 | 34433014 | + | 2032  | 449.0811 | 0        | -1.50198 | 0.317225 | -4.73474 | 7.32E-06 | 0.000317 | 0.192463 |
| ENSG0000 | mucosal h | Inflamed | IGLV1-41  | IG_V_pseu  | chr22 | 22758539 | 22759053 | + | 406   | 103.642  | 0.064439 | -1.65019 | 0.348598 | -4.73381 | 7.35E-06 | 0.000317 | 0.193181 |
| ENSG0000 | mucosal h | Inflamed | HES5      | protein_cc | chr1  | 2460184  | 2461684  | - | 1306  | 35.70644 | 0.004773 | 1.023861 | 0.216412 | 4.731069 | 7.43E-06 | 0.00032  | 0.19532  |
| ENSG0000 | mucosal h | Inflamed | TNFRSF4   | protein_cc | chr1  | 1146706  | 1149518  | - | 1721  | 339.5036 | 0        | -1.18549 | 0.250576 | -4.73105 | 7.43E-06 | 0.00032  | 0.195334 |
| ENSG0000 | mucosal h | Inflamed | RP11-496  | lincRNA    | chr4  | 24661479 | 24673191 | + | 2195  | 10.51313 | 0.157518 | 1.282361 | 0.271183 | 4.728767 | 7.50E-06 | 0.000322 | 0.197134 |
| ENSG0000 | mucosal h | Inflamed | AP001046  | lincRNA    | chr21 | 44783212 | 44786446 | + | 2816  | 1.367542 | 0.706444 | -0.78071 | 0.165102 | -4.72866 | 7.50E-06 | 0.000322 | 0.197222 |
| ENSG0000 | mucosal h | Inflamed | PHYH      | protein_cc | chr10 | 13319796 | 13344412 | - | 3381  | 1220.198 | 0        | 0.632491 | 0.133837 | 4.725831 | 7.59E-06 | 0.000325 | 0.199471 |
| ENSG0000 | mucosal h | Inflamed | SPI1      | protein_cc | chr11 | 47376411 | 47400127 | - | 2069  | 2341.384 | 0        | -1.09088 | 0.230869 | -4.72512 | 7.61E-06 | 0.000325 | 0.20004  |
| ENSG0000 | mucosal h | Inflamed | MT1M      | protein_cc | chr16 | 56666145 | 56667898 | + | 942   | 360.1814 | 0.004773 | 1.723707 | 0.364954 | 4.723087 | 7.67E-06 | 0.000327 | 0.201679 |
| ENSG0000 | mucosal h | Inflamed | C4orf50   | protein_cc | chr4  | 5958845  | 5991545  | - | 4557  | 12.61337 | 0.286396 | -1.455   | 0.308106 | -4.72242 | 7.69E-06 | 0.000327 | 0.202223 |
| ENSG0000 | mucosal h | Inflamed | IGKV2-30  | IG_V_gene  | chr2  | 89544264 | 89545079 | - | 390   | 3627.06  | 0        | -1.62238 | 0.343562 | -4.72224 | 7.70E-06 | 0.000327 | 0.202368 |
| ENSG0000 | mucosal h | Inflamed | AF064860  | lincRNA    | chr21 | 41099682 | 41102607 | + | 1786  | 9.77327  | 0.214797 | 1.487944 | 0.315345 | 4.718462 | 7.81E-06 | 0.000332 | 0.205455 |
| ENSG0000 | mucosal h | Inflamed | C4BPA     | protein_cc | chr1  | 2.07E+08 | 2.07E+08 | + | 2441  | 605.9666 | 0        | -2.31004 | 0.489608 | -4.71813 | 7.83E-06 | 0.000332 | 0.205727 |

|          |           |          |           |                  |          |          |   |       |          |          |          |          |          |          |          |          |
|----------|-----------|----------|-----------|------------------|----------|----------|---|-------|----------|----------|----------|----------|----------|----------|----------|----------|
| ENSG0000 | mucosal h | Inflamed | PLA2G16   | protein_cc chr11 | 63340667 | 63384355 | - | 3104  | 413.9117 | 0        | -0.79458 | 0.168502 | -4.71555 | 7.91E-06 | 0.000335 | 0.207871 |
| ENSG0000 | mucosal h | Inflamed | SLA       | protein_cc chr8  | 1.34E+08 | 1.34E+08 | - | 7633  | 1209.224 | 0        | -1.06036 | 0.225028 | -4.71213 | 8.02E-06 | 0.000339 | 0.210733 |
| ENSG0000 | mucosal h | Inflamed | ANO7      | protein_cc chr2  | 2.42E+08 | 2.42E+08 | + | 5695  | 1426.687 | 0        | 1.386156 | 0.294328 | 4.70957  | 8.10E-06 | 0.000342 | 0.212908 |
| ENSG0000 | mucosal h | Inflamed | CLEC4E    | protein_cc chr12 | 8685901  | 8693559  | - | 2422  | 141.1981 | 0.026253 | -1.98357 | 0.421238 | -4.70891 | 8.12E-06 | 0.000342 | 0.213474 |
| ENSG0000 | mucosal h | Inflamed | HOXA11-A  | antisense chr7   | 27224137 | 27228912 | + | 2917  | 605.1265 | 0        | 1.045831 | 0.222164 | 4.707462 | 8.17E-06 | 0.000344 | 0.214713 |
| ENSG0000 | mucosal h | Inflamed | RP5-1013f | lincRNA chr20    | 43062837 | 43063236 | + | 400   | 16.06444 | 0.047733 | 0.997391 | 0.211947 | 4.705844 | 8.22E-06 | 0.000345 | 0.216109 |
| ENSG0000 | mucosal h | Inflamed | LAPTM5    | protein_cc chr1  | 31205316 | 31230667 | - | 3274  | 9853.138 | 0        | -0.81178 | 0.172514 | -4.7056  | 8.23E-06 | 0.000345 | 0.216324 |
| ENSG0000 | mucosal h | Inflamed | AC097468  | antisense chr2   | 2.2E+08  | 2.2E+08  | + | 1992  | 11.62291 | 0.114558 | 1.186949 | 0.252247 | 4.705497 | 8.23E-06 | 0.000345 | 0.216409 |
| ENSG0000 | mucosal h | Inflamed | MST1L     | pseudoger chr1   | 17081405 | 17096732 | - | 5295  | 378.9618 | 0.009547 | 1.959831 | 0.416537 | 4.705055 | 8.25E-06 | 0.000345 | 0.216792 |
| ENSG0000 | mucosal h | Inflamed | AC021016  | processed_chr2   | 2.19E+08 | 2.19E+08 | - | 775   | 11.11217 | 0.042959 | -1.01677 | 0.216167 | -4.70363 | 8.29E-06 | 0.000346 | 0.218034 |
| ENSG0000 | mucosal h | Inflamed | CPZ       | protein_cc chr4  | 8594387  | 8621488  | + | 5562  | 32.70883 | 0.073986 | -1.30535 | 0.277565 | -4.70286 | 8.32E-06 | 0.000347 | 0.218707 |
| ENSG0000 | mucosal h | Inflamed | LPCAT1    | protein_cc chr5  | 1456595  | 1524092  | - | 6494  | 4154.68  | 0        | -0.8368  | 0.177967 | -4.70199 | 8.35E-06 | 0.000347 | 0.219466 |
| ENSG0000 | mucosal h | Inflamed | TXNDC15   | protein_cc chr5  | 1.34E+08 | 1.34E+08 | + | 5265  | 1818.881 | 0        | -0.60539 | 0.128801 | -4.70023 | 8.41E-06 | 0.000349 | 0.221024 |
| ENSG0000 | mucosal h | Inflamed | LILRB1    | protein_cc chr19 | 55085346 | 55148979 | + | 5078  | 1084.678 | 0        | -1.19366 | 0.25396  | -4.70018 | 8.41E-06 | 0.000349 | 0.22106  |
| ENSG0000 | mucosal h | Inflamed | ZNF395    | protein_cc chr8  | 28203102 | 28260218 | - | 5819  | 1892.22  | 0        | 0.525206 | 0.111776 | 4.698755 | 8.46E-06 | 0.00035  | 0.222327 |
| ENSG0000 | mucosal h | Inflamed | CTD-2619J | antisense chr19  | 58873951 | 58877958 | + | 790   | 8.909308 | 0.097852 | 0.8385   | 0.178512 | 4.697179 | 8.51E-06 | 0.000352 | 0.223734 |
| ENSG0000 | mucosal h | Inflamed | RP11-104J | antisense chr17  | 34328458 | 34338658 | + | 1920  | 7.961814 | 0.181384 | 1.035145 | 0.220395 | 4.696763 | 8.52E-06 | 0.000352 | 0.224106 |
| ENSG0000 | mucosal h | Inflamed | RPS4XP7   | pseudoger chr6   | 13521498 | 13522277 | + | 780   | 12.30549 | 0.252983 | 1.166983 | 0.248477 | 4.696546 | 8.53E-06 | 0.000352 | 0.2243   |
| ENSG0000 | mucosal h | Inflamed | HK3       | protein_cc chr5  | 1.76E+08 | 1.76E+08 | - | 3290  | 564.2458 | 0        | -1.31324 | 0.279721 | -4.69483 | 8.59E-06 | 0.000353 | 0.225843 |
| ENSG0000 | mucosal h | Inflamed | STRA6     | protein_cc chr15 | 74471807 | 74504608 | - | 7690  | 180.4368 | 0.045346 | -1.99121 | 0.424222 | -4.6938  | 8.63E-06 | 0.000354 | 0.226773 |
| ENSG0000 | mucosal h | Inflamed | RHOH      | protein_cc chr4  | 40192673 | 40248587 | + | 6594  | 488.5036 | 0        | -1.22054 | 0.260088 | -4.6928  | 8.66E-06 | 0.000355 | 0.22769  |
| ENSG0000 | mucosal h | Inflamed | CMTM7     | protein_cc chr3  | 32433163 | 32524559 | + | 3751  | 644.2673 | 0        | -0.78714 | 0.167774 | -4.69164 | 8.70E-06 | 0.000356 | 0.228744 |
| ENSG0000 | mucosal h | Inflamed | IGKV2D-4C | IG_V_gene chr2   | 89890601 | 89891307 | + | 336   | 708.8735 | 0.00716  | -2.15824 | 0.460091 | -4.69091 | 8.73E-06 | 0.000357 | 0.229411 |
| ENSG0000 | mucosal h | Inflamed | LHX4      | protein_cc chr1  | 1.8E+08  | 1.8E+08  | + | 7324  | 76.179   | 0.00716  | 1.431159 | 0.305129 | 4.690334 | 8.75E-06 | 0.000357 | 0.229941 |
| ENSG0000 | mucosal h | Inflamed | ATAD3C    | protein_cc chr1  | 1385069  | 1405538  | + | 3976  | 65.36754 | 0.002387 | -0.92556 | 0.197397 | -4.6888  | 8.80E-06 | 0.000358 | 0.231355 |
| ENSG0000 | mucosal h | Inflamed | DUSP5     | protein_cc chr10 | 1.12E+08 | 1.12E+08 | + | 2615  | 1963.702 | 0        | -0.87583 | 0.186812 | -4.68827 | 8.82E-06 | 0.000358 | 0.231843 |
| ENSG0000 | mucosal h | Inflamed | RP5-1057J | lincRNA chr1     | 23704873 | 23705522 | - | 650   | 25.24105 | 0.026253 | 1.037059 | 0.221208 | 4.688162 | 8.82E-06 | 0.000358 | 0.231945 |
| ENSG0000 | mucosal h | Inflamed | RNF152    | protein_cc chr18 | 59475296 | 59561480 | - | 9924  | 877.3819 | 0        | 1.241337 | 0.264805 | 4.687732 | 8.84E-06 | 0.000359 | 0.232344 |
| ENSG0000 | mucosal h | Inflamed | RPS15AP1  | pseudoger chr1   | 45245998 | 45246387 | - | 390   | 9.582339 | 0.214797 | 1.043199 | 0.222709 | 4.68414  | 8.97E-06 | 0.000363 | 0.235701 |
| ENSG0000 | mucosal h | Inflamed | MFNG      | protein_cc chr22 | 37865101 | 37882439 | - | 3042  | 1092.742 | 0        | -0.64737 | 0.138231 | -4.68321 | 9.00E-06 | 0.000364 | 0.236577 |
| ENSG0000 | mucosal h | Inflamed | CELF5     | protein_cc chr19 | 3224701  | 3297074  | + | 6024  | 23.24821 | 0.038186 | 1.020754 | 0.218043 | 4.68143  | 9.06E-06 | 0.000366 | 0.238265 |
| ENSG0000 | mucosal h | Inflamed | EAPP      | protein_cc chr14 | 34985135 | 35008916 | - | 2022  | 1189.048 | 0        | 0.474301 | 0.10133  | 4.680759 | 9.09E-06 | 0.000366 | 0.238904 |
| ENSG0000 | mucosal h | Inflamed | DNASE2    | protein_cc chr19 | 12986025 | 12992282 | - | 2389  | 1516.069 | 0        | -0.44491 | 0.095056 | -4.68048 | 9.10E-06 | 0.000366 | 0.239172 |
| ENSG0000 | mucosal h | Inflamed | RP11-586I | lincRNA chr4     | 6202460  | 6240044  | + | 2547  | 7.546539 | 0.236277 | -1.13768 | 0.243123 | -4.67944 | 9.14E-06 | 0.000367 | 0.240162 |
| ENSG0000 | mucosal h | Inflamed | NRROS     | protein_cc chr3  | 1.96E+08 | 1.96E+08 | + | 2910  | 453.6539 | 0        | -0.91734 | 0.196067 | -4.67869 | 9.16E-06 | 0.000367 | 0.240884 |
| ENSG0000 | mucosal h | Inflamed | RP13-497k | antisense chr4   | 23781213 | 23784183 | + | 442   | 24.53699 | 0.23389  | 1.823009 | 0.389642 | 4.678677 | 9.16E-06 | 0.000367 | 0.240898 |
| ENSG0000 | mucosal h | Inflamed | ARSD      | protein_cc chrX  | 2822011  | 2847392  | - | 7030  | 3596.747 | 0        | 0.671106 | 0.143465 | 4.677833 | 9.19E-06 | 0.000368 | 0.241711 |
| ENSG0000 | mucosal h | Inflamed | CCDC108   | protein_cc chr2  | 2.2E+08  | 2.2E+08  | - | 10519 | 18.65632 | 0.02864  | 1.141859 | 0.244124 | 4.677371 | 9.21E-06 | 0.000368 | 0.242156 |
| ENSG0000 | mucosal h | Inflamed | CTSK      | protein_cc chr1  | 1.51E+08 | 1.51E+08 | - | 1887  | 2342.391 | 0        | -1.08252 | 0.231466 | -4.67678 | 9.23E-06 | 0.000368 | 0.242728 |
| ENSG0000 | mucosal h | Inflamed | LINC00877 | lincRNA chr3     | 72084451 | 72291716 | - | 4520  | 51.50835 | 0.002387 | -1.21622 | 0.260154 | -4.67499 | 9.30E-06 | 0.00037  | 0.244468 |

|          |           |          |           |                  |          |          |   |       |          |          |          |          |          |          |          |          |
|----------|-----------|----------|-----------|------------------|----------|----------|---|-------|----------|----------|----------|----------|----------|----------|----------|----------|
| ENSG0000 | mucosal h | Inflamed | APOBEC3C  | protein_cc chr22 | 39436924 | 39483748 | + | 5496  | 619.2243 | 0        | -0.90115 | 0.192809 | -4.67381 | 9.34E-06 | 0.000372 | 0.245621 |
| ENSG0000 | mucosal h | Inflamed | MT1G      | protein_cc chr16 | 56700643 | 56701977 | - | 750   | 2189.334 | 0        | 1.575195 | 0.337056 | 4.673393 | 9.36E-06 | 0.000372 | 0.246029 |
| ENSG0000 | mucosal h | Inflamed | PRSS33    | protein_cc chr16 | 2833954  | 2837949  | - | 2112  | 52.52506 | 0.019093 | -1.39302 | 0.298104 | -4.67294 | 9.38E-06 | 0.000372 | 0.246476 |
| ENSG0000 | mucosal h | Inflamed | D86994.2  | miRNA chr22      | 23006898 | 23006993 | + | 96    | 947.6921 | 0.073986 | -1.65665 | 0.354581 | -4.67215 | 9.40E-06 | 0.000372 | 0.247254 |
| ENSG0000 | mucosal h | Inflamed | FOXQ1     | protein_cc chr6  | 1312675  | 1314992  | + | 2318  | 307.1718 | 0.002387 | -1.36943 | 0.293141 | -4.67159 | 9.43E-06 | 0.000372 | 0.247804 |
| ENSG0000 | mucosal h | Inflamed | ADPGK-AS  | antisense chr15  | 73075176 | 73090540 | + | 3138  | 9.147971 | 0.066826 | -0.8943  | 0.191437 | -4.67152 | 9.43E-06 | 0.000372 | 0.247871 |
| ENSG0000 | mucosal h | Inflamed | IGKV3OR2  | IG_V_gene chr2   | 87565634 | 87566158 | + | 350   | 71.0358  | 0.033413 | -1.78839 | 0.382858 | -4.67115 | 9.44E-06 | 0.000372 | 0.248242 |
| ENSG0000 | mucosal h | Inflamed | DBNDD2    | protein_cc chr20 | 44034697 | 44039250 | + | 2764  | 336.1575 | 0        | 0.633598 | 0.135703 | 4.668995 | 9.52E-06 | 0.000374 | 0.250382 |
| ENSG0000 | mucosal h | Inflamed | ICAM2     | protein_cc chr17 | 62079954 | 62097994 | - | 3243  | 813.8115 | 0        | -0.98299 | 0.210538 | -4.66897 | 9.52E-06 | 0.000374 | 0.250403 |
| ENSG0000 | mucosal h | Inflamed | C9orf116  | protein_cc chr9  | 1.38E+08 | 1.38E+08 | - | 1864  | 43.05012 | 0        | -0.86512 | 0.185298 | -4.66882 | 9.53E-06 | 0.000374 | 0.250552 |
| ENSG0000 | mucosal h | Inflamed | FCGR2A    | protein_cc chr1  | 1.61E+08 | 1.61E+08 | + | 5314  | 2114.695 | 0        | -1.32163 | 0.283204 | -4.66672 | 9.61E-06 | 0.000377 | 0.252659 |
| ENSG0000 | mucosal h | Inflamed | TESC      | protein_cc chr12 | 1.17E+08 | 1.18E+08 | - | 1926  | 245.432  | 0        | -1.17598 | 0.252057 | -4.66552 | 9.66E-06 | 0.000378 | 0.253872 |
| ENSG0000 | mucosal h | Inflamed | SERPINE1  | protein_cc chr7  | 1.01E+08 | 1.01E+08 | + | 3190  | 1984.537 | 0.002387 | -2.1849  | 0.468349 | -4.66512 | 9.67E-06 | 0.000378 | 0.254282 |
| ENSG0000 | mucosal h | Inflamed | ANXA13    | protein_cc chr8  | 1.25E+08 | 1.25E+08 | - | 3806  | 542.2888 | 0.004773 | 1.394666 | 0.299014 | 4.664214 | 9.71E-06 | 0.000378 | 0.255198 |
| ENSG0000 | mucosal h | Inflamed | EAF2      | protein_cc chr3  | 1.22E+08 | 1.22E+08 | + | 1770  | 253.9356 | 0        | -0.99427 | 0.213176 | -4.66406 | 9.71E-06 | 0.000378 | 0.255356 |
| ENSG0000 | mucosal h | Inflamed | TMEM45A   | protein_cc chr3  | 1E+08    | 1E+08    | + | 6005  | 270.7566 | 0        | -0.94179 | 0.201989 | -4.66256 | 9.77E-06 | 0.00038  | 0.256882 |
| ENSG0000 | mucosal h | Inflamed | GRINA     | protein_cc chr8  | 1.45E+08 | 1.45E+08 | + | 2527  | 6569.487 | 0        | -0.68399 | 0.146725 | -4.66173 | 9.80E-06 | 0.000381 | 0.25774  |
| ENSG0000 | mucosal h | Inflamed | IGKV2-40  | IG_V_gene chr2   | 89629873 | 89630186 | - | 314   | 47.07399 | 0.109785 | -1.93124 | 0.414311 | -4.66133 | 9.82E-06 | 0.000381 | 0.258146 |
| ENSG0000 | mucosal h | Inflamed | RP11-467L | pseudoger chr12  | 31907651 | 31908055 | + | 405   | 11.34606 | 0.062053 | -0.99554 | 0.213588 | -4.66103 | 9.83E-06 | 0.000381 | 0.25845  |
| ENSG0000 | mucosal h | Inflamed | TSHZ1     | protein_cc chr18 | 72922710 | 73001905 | + | 8281  | 1362.632 | 0        | 0.729209 | 0.156493 | 4.659681 | 9.88E-06 | 0.000382 | 0.259846 |
| ENSG0000 | mucosal h | Inflamed | HAVCR2    | protein_cc chr5  | 1.57E+08 | 1.57E+08 | - | 3804  | 394.3413 | 0        | -0.8182  | 0.175726 | -4.6561  | 1.00E-05 | 0.000387 | 0.263575 |
| ENSG0000 | mucosal h | Inflamed | IL27      | protein_cc chr16 | 28510683 | 28523372 | - | 1270  | 12.62291 | 0.155131 | -1.23415 | 0.265064 | -4.65603 | 1.00E-05 | 0.000387 | 0.263648 |
| ENSG0000 | mucosal h | Inflamed | C6orf223  | protein_cc chr6  | 43968317 | 43973695 | + | 3917  | 399.2267 | 0        | -1.38747 | 0.298051 | -4.65513 | 1.01E-05 | 0.000387 | 0.264591 |
| ENSG0000 | mucosal h | Inflamed | COTL1     | protein_cc chr16 | 84599200 | 84651683 | - | 6742  | 8011.95  | 0        | -0.60227 | 0.129386 | -4.65482 | 1.01E-05 | 0.000387 | 0.264927 |
| ENSG0000 | mucosal h | Inflamed | RP11-511E | antisense chr12  | 93397191 | 93609455 | - | 1914  | 3.615752 | 0.310263 | 0.73653  | 0.158256 | 4.654044 | 1.01E-05 | 0.000388 | 0.265742 |
| ENSG0000 | mucosal h | Inflamed | RP11-554I | pseudoger chr12  | 1.08E+08 | 1.08E+08 | - | 679   | 6.584726 | 0.126492 | -0.99933 | 0.214913 | -4.64993 | 1.03E-05 | 0.000394 | 0.270123 |
| ENSG0000 | mucosal h | Inflamed | AC009133  | lincRNA chr16    | 29793246 | 29794294 | + | 1049  | 1568.621 | 0.011933 | 2.587364 | 0.556524 | 4.649151 | 1.03E-05 | 0.000394 | 0.270965 |
| ENSG0000 | mucosal h | Inflamed | MYO1D     | protein_cc chr17 | 30819540 | 31204195 | - | 7731  | 25977.47 | 0        | 0.826935 | 0.177876 | 4.648936 | 1.03E-05 | 0.000394 | 0.271196 |
| ENSG0000 | mucosal h | Inflamed | IGHV3-15  | IG_V_gene chr14  | 1.07E+08 | 1.07E+08 | - | 437   | 15049.61 | 0        | -1.66743 | 0.358775 | -4.64757 | 1.04E-05 | 0.000396 | 0.272674 |
| ENSG0000 | mucosal h | Inflamed | SHANK2    | protein_cc chr11 | 70313961 | 70963623 | - | 16428 | 522.5274 | 0        | 0.913594 | 0.196623 | 4.646426 | 1.04E-05 | 0.000397 | 0.273917 |
| ENSG0000 | mucosal h | Inflamed | CEACAM1   | protein_cc chr19 | 45165545 | 45187631 | + | 5202  | 281.3055 | 0.004773 | 1.071733 | 0.230722 | 4.645129 | 1.05E-05 | 0.000398 | 0.275332 |
| ENSG0000 | mucosal h | Inflamed | KCNA3     | protein_cc chr1  | 1.11E+08 | 1.11E+08 | - | 3346  | 337.5609 | 0        | -1.3115  | 0.282503 | -4.64245 | 1.06E-05 | 0.000402 | 0.278279 |
| ENSG0000 | mucosal h | Inflamed | FAM184B   | protein_cc chr4  | 17630929 | 17783135 | - | 6622  | 20.50597 | 0.26253  | 1.240803 | 0.267484 | 4.638795 | 1.07E-05 | 0.000407 | 0.282348 |
| ENSG0000 | mucosal h | Inflamed | SLC22A5   | protein_cc chr5  | 1.32E+08 | 1.32E+08 | + | 12788 | 2252.761 | 0        | 0.9744   | 0.210062 | 4.638637 | 1.07E-05 | 0.000407 | 0.282526 |
| ENSG0000 | mucosal h | Inflamed | C6orf136  | protein_cc chr6  | 30614816 | 30620987 | + | 2118  | 1612.057 | 0        | 0.614846 | 0.132564 | 4.6381   | 1.08E-05 | 0.000407 | 0.283129 |
| ENSG0000 | mucosal h | Inflamed | IGHV3-33  | IG_V_gene chr14  | 1.07E+08 | 1.07E+08 | - | 431   | 5696.236 | 0        | -1.83166 | 0.394918 | -4.63809 | 1.08E-05 | 0.000407 | 0.283142 |
| ENSG0000 | mucosal h | Inflamed | RP11-44N  | lincRNA chr14    | 1.06E+08 | 1.06E+08 | + | 1177  | 57.68974 | 0        | 0.73868  | 0.159274 | 4.637786 | 1.08E-05 | 0.000407 | 0.283482 |
| ENSG0000 | mucosal h | Inflamed | LAT2      | protein_cc chr7  | 73613982 | 73644161 | + | 4542  | 804.0215 | 0        | -0.86934 | 0.187467 | -4.6373  | 1.08E-05 | 0.000407 | 0.284035 |
| ENSG0000 | mucosal h | Inflamed | LYPD5     | protein_cc chr19 | 44300081 | 44331358 | - | 5091  | 314.5298 | 0        | -1.19752 | 0.258314 | -4.63592 | 1.09E-05 | 0.000409 | 0.285594 |
| ENSG0000 | mucosal h | Inflamed | CTHRC1    | protein_cc chr8  | 1.04E+08 | 1.04E+08 | + | 1776  | 311.5752 | 0        | -1.69409 | 0.365536 | -4.63453 | 1.09E-05 | 0.00041  | 0.287169 |

|          |           |          |           |                  |          |          |   |      |          |          |          |          |          |          |          |          |
|----------|-----------|----------|-----------|------------------|----------|----------|---|------|----------|----------|----------|----------|----------|----------|----------|----------|
| ENSG0000 | mucosal h | Inflamed | FAM26F    | protein_cc chr6  | 1.17E+08 | 1.17E+08 | + | 1186 | 361.5036 | 0        | -1.1975  | 0.258425 | -4.63383 | 1.10E-05 | 0.000411 | 0.287968 |
| ENSG0000 | mucosal h | Inflamed | P2RY6     | protein_cc chr11 | 72975550 | 73009662 | + | 3976 | 454.9928 | 0        | -0.84205 | 0.181731 | -4.63349 | 1.10E-05 | 0.000411 | 0.288352 |
| ENSG0000 | mucosal h | Inflamed | CCDC13    | protein_cc chr3  | 42734155 | 42814745 | - | 4966 | 51.73031 | 0.004773 | 0.896003 | 0.19341  | 4.63266  | 1.10E-05 | 0.000412 | 0.289309 |
| ENSG0000 | mucosal h | Inflamed | RP11-480I | lincRNA chr1     | 2.03E+08 | 2.03E+08 | + | 2321 | 8.22673  | 0.155131 | 0.867182 | 0.187218 | 4.631929 | 1.10E-05 | 0.000412 | 0.29015  |
| ENSG0000 | mucosal h | Inflamed | CTD-2005I | pseudoger chr4   | 69650336 | 69653192 | + | 714  | 3.947494 | 0.400955 | 0.816142 | 0.176393 | 4.626825 | 1.13E-05 | 0.00042  | 0.296085 |
| ENSG0000 | mucosal h | Inflamed | NUGGC     | protein_cc chr8  | 27879481 | 27941388 | - | 3978 | 329.9117 | 0        | -1.33766 | 0.289129 | -4.62653 | 1.13E-05 | 0.00042  | 0.296426 |
| ENSG0000 | mucosal h | Inflamed | RP11-380F | antisense chr4   | 23562546 | 23770275 | + | 703  | 9.334129 | 0.362768 | 1.35877  | 0.293707 | 4.626281 | 1.13E-05 | 0.00042  | 0.296723 |
| ENSG0000 | mucosal h | Inflamed | TMED6     | protein_cc chr16 | 69377151 | 69385712 | - | 1411 | 33.24821 | 0.01432  | 0.996092 | 0.215346 | 4.625547 | 1.13E-05 | 0.00042  | 0.297588 |
| ENSG0000 | mucosal h | Inflamed | CARD14    | protein_cc chr17 | 78143791 | 78183130 | + | 8232 | 161.5394 | 0        | -1.23423 | 0.266923 | -4.62393 | 1.14E-05 | 0.000422 | 0.299499 |
| ENSG0000 | mucosal h | Inflamed | CFI       | protein_cc chr4  | 1.11E+08 | 1.11E+08 | - | 3873 | 861.7327 | 0        | -1.41791 | 0.306701 | -4.6231  | 1.14E-05 | 0.000423 | 0.300492 |
| ENSG0000 | mucosal h | Inflamed | PXMP2     | protein_cc chr12 | 1.33E+08 | 1.33E+08 | + | 2051 | 668.5513 | 0        | 0.78506  | 0.169821 | 4.622861 | 1.14E-05 | 0.000423 | 0.300774 |
| ENSG0000 | mucosal h | Inflamed | C14orf93  | protein_cc chr14 | 23456110 | 23479375 | - | 3250 | 394.957  | 0        | 0.349106 | 0.075542 | 4.621338 | 1.15E-05 | 0.000425 | 0.302595 |
| ENSG0000 | mucosal h | Inflamed | UGT2A3    | protein_cc chr4  | 69794181 | 69817509 | - | 3062 | 723.7661 | 0.054893 | 2.550116 | 0.55215  | 4.618518 | 1.16E-05 | 0.000429 | 0.305995 |
| ENSG0000 | mucosal h | Inflamed | KLK3      | protein_cc chr19 | 51358171 | 51364020 | + | 4639 | 105.1957 | 0.02864  | 1.712481 | 0.370824 | 4.618038 | 1.17E-05 | 0.000429 | 0.306578 |
| ENSG0000 | mucosal h | Inflamed | RP11-277E | antisense chr1   | 1.67E+08 | 1.67E+08 | - | 682  | 11.15274 | 0.0358   | 0.83126  | 0.180017 | 4.617684 | 1.17E-05 | 0.000429 | 0.307008 |
| ENSG0000 | mucosal h | Inflamed | TSPO2     | protein_cc chr6  | 41010293 | 41012076 | + | 988  | 7.718377 | 0.322196 | -1.18486 | 0.25662  | -4.61716 | 1.17E-05 | 0.00043  | 0.307639 |
| ENSG0000 | mucosal h | Inflamed | BEST4     | protein_cc chr1  | 45249257 | 45253377 | - | 2047 | 1951.439 | 0        | 2.325297 | 0.503819 | 4.615342 | 1.18E-05 | 0.000432 | 0.309869 |
| ENSG0000 | mucosal h | Inflamed | RP11-106C | pseudoger chr12  | 27855271 | 27855839 | + | 569  | 9.093079 | 0.190931 | 1.233112 | 0.267292 | 4.61335  | 1.19E-05 | 0.000435 | 0.312322 |
| ENSG0000 | mucosal h | Inflamed | AIFM3     | protein_cc chr22 | 21319396 | 21335649 | + | 5332 | 1813.604 | 0        | 1.389991 | 0.301372 | 4.612217 | 1.19E-05 | 0.000436 | 0.313726 |
| ENSG0000 | mucosal h | Inflamed | HLA-E     | protein_cc chr6  | 30457244 | 30461982 | + | 2975 | 42464.64 | 0        | -0.36805 | 0.079862 | -4.60856 | 1.21E-05 | 0.000442 | 0.318304 |
| ENSG0000 | mucosal h | Inflamed | XX-CR54.3 | lincRNA chr1     | 2.49E+08 | 2.49E+08 | - | 1098 | 49.8568  | 0.069212 | 1.730466 | 0.37575  | 4.605372 | 1.23E-05 | 0.000447 | 0.322339 |
| ENSG0000 | mucosal h | Inflamed | IGSF5     | protein_cc chr21 | 41117334 | 41174023 | + | 2650 | 6.011933 | 0.312649 | 1.207733 | 0.262293 | 4.604527 | 1.23E-05 | 0.000448 | 0.323418 |
| ENSG0000 | mucosal h | Inflamed | ZNF575    | protein_cc chr19 | 44029649 | 44040282 | + | 3222 | 401.0597 | 0        | 0.960897 | 0.208695 | 4.604315 | 1.23E-05 | 0.000448 | 0.323689 |
| ENSG0000 | mucosal h | Inflamed | SIAH2-AS1 | antisense chr3   | 1.5E+08  | 1.5E+08  | + | 441  | 2.410501 | 0.408115 | 0.616875 | 0.134031 | 4.602496 | 1.24E-05 | 0.00045  | 0.326026 |
| ENSG0000 | mucosal h | Inflamed | LRRC25    | protein_cc chr19 | 18501954 | 18508427 | - | 2415 | 718.7446 | 0        | -1.01653 | 0.220921 | -4.60132 | 1.25E-05 | 0.000452 | 0.327549 |
| ENSG0000 | mucosal h | Inflamed | SLC39A2   | protein_cc chr14 | 21467414 | 21470030 | + | 1575 | 38.12649 | 0.152745 | 1.576955 | 0.34282  | 4.599955 | 1.25E-05 | 0.000454 | 0.329317 |
| ENSG0000 | mucosal h | Inflamed | GUCY2D    | protein_cc chr17 | 7905912  | 7923657  | + | 4040 | 13.40334 | 0.045346 | -1.01533 | 0.220747 | -4.59951 | 1.25E-05 | 0.000454 | 0.329901 |
| ENSG0000 | mucosal h | Inflamed | LINC00582 | antisense chr1   | 2.32E+08 | 2.32E+08 | - | 597  | 24.93079 | 0.016706 | -1.17572 | 0.255676 | -4.59848 | 1.26E-05 | 0.000455 | 0.331246 |
| ENSG0000 | mucosal h | Inflamed | C15orf38  | protein_cc chr15 | 90443159 | 90456188 | - | 3673 | 1339.384 | 0        | 0.538044 | 0.117012 | 4.598185 | 1.26E-05 | 0.000455 | 0.331629 |
| ENSG0000 | mucosal h | Inflamed | CNTD1     | protein_cc chr17 | 40950810 | 40963605 | + | 3378 | 10.93556 | 0.083532 | 1.035846 | 0.225343 | 4.596759 | 1.27E-05 | 0.000457 | 0.333502 |
| ENSG0000 | mucosal h | Inflamed | VNN3      | protein_cc chr6  | 1.33E+08 | 1.33E+08 | - | 3846 | 37.42959 | 0.159905 | -1.86041 | 0.404763 | -4.59631 | 1.27E-05 | 0.000457 | 0.334099 |
| ENSG0000 | mucosal h | Inflamed | GYG2P1    | pseudoger chrY   | 14475147 | 14532255 | - | 2159 | 38.88067 | 0.412888 | 0.584888 | 0.127271 | 4.59559  | 1.27E-05 | 0.000457 | 0.335046 |
| ENSG0000 | mucosal h | Inflamed | IGHV1-3   | IG_V_gene chr14  | 1.06E+08 | 1.06E+08 | - | 393  | 1978.205 | 0        | -1.88314 | 0.409784 | -4.59544 | 1.28E-05 | 0.000457 | 0.335239 |
| ENSG0000 | mucosal h | Inflamed | ROPN1L    | protein_cc chr5  | 10441636 | 10472141 | + | 1817 | 12.76134 | 0.159905 | -1.26716 | 0.275745 | -4.5954  | 1.28E-05 | 0.000457 | 0.335292 |
| ENSG0000 | mucosal h | Inflamed | DMBT1     | protein_cc chr10 | 1.24E+08 | 1.24E+08 | + | 8073 | 46831.9  | 0        | -2.39024 | 0.52025  | -4.5944  | 1.28E-05 | 0.000458 | 0.336625 |
| ENSG0000 | mucosal h | Inflamed | SLC39A11  | protein_cc chr17 | 70642088 | 71088851 | - | 5583 | 1525.045 | 0        | 0.532809 | 0.116031 | 4.59194  | 1.29E-05 | 0.000462 | 0.339911 |
| ENSG0000 | mucosal h | Inflamed | SRM       | protein_cc chr1  | 11114641 | 11120081 | - | 1898 | 2310.391 | 0        | -0.6963  | 0.151689 | -4.59031 | 1.30E-05 | 0.000464 | 0.342103 |
| ENSG0000 | mucosal h | Inflamed | VWA1      | protein_cc chr1  | 1370241  | 1378262  | + | 5065 | 4033.9   | 0        | -0.83066 | 0.180981 | -4.58976 | 1.30E-05 | 0.000465 | 0.342847 |
| ENSG0000 | mucosal h | Inflamed | FAM162A   | protein_cc chr3  | 1.22E+08 | 1.22E+08 | + | 3793 | 2145.36  | 0        | 0.802482 | 0.174898 | 4.588289 | 1.31E-05 | 0.000467 | 0.344846 |
| ENSG0000 | mucosal h | Inflamed | TRPV4     | protein_cc chr12 | 1.1E+08  | 1.1E+08  | - | 3765 | 120.2721 | 0        | -1.06681 | 0.232573 | -4.58699 | 1.32E-05 | 0.000468 | 0.346619 |

|          |           |          |           |                  |          |          |   |       |          |          |          |          |          |          |          |          |
|----------|-----------|----------|-----------|------------------|----------|----------|---|-------|----------|----------|----------|----------|----------|----------|----------|----------|
| ENSG0000 | mucosal h | Inflamed | HLA-DRB5  | protein_cc chr6  | 32485120 | 32498064 | - | 1260  | 3516.229 | 0.002387 | -0.93684 | 0.20433  | -4.58492 | 1.33E-05 | 0.000471 | 0.349458 |
| ENSG0000 | mucosal h | Inflamed | IGHV1-58  | IG_V_gene chr14  | 1.07E+08 | 1.07E+08 | - | 412   | 636.3198 | 0.004773 | -1.9401  | 0.423148 | -4.58491 | 1.33E-05 | 0.000471 | 0.349469 |
| ENSG0000 | mucosal h | Inflamed | CHST15    | protein_cc chr10 | 1.26E+08 | 1.26E+08 | - | 5207  | 2135.704 | 0        | -1.10346 | 0.240733 | -4.58376 | 1.34E-05 | 0.000472 | 0.35106  |
| ENSG0000 | mucosal h | Inflamed | NOS2      | protein_cc chr17 | 26083792 | 26127525 | - | 4176  | 14841.25 | 0        | -2.13293 | 0.465397 | -4.58304 | 1.34E-05 | 0.000473 | 0.352056 |
| ENSG0000 | mucosal h | Inflamed | CYTH4     | protein_cc chr22 | 37678068 | 37711382 | + | 6157  | 2259.122 | 0        | -1.02661 | 0.224018 | -4.58271 | 1.34E-05 | 0.000473 | 0.352522 |
| ENSG0000 | mucosal h | Inflamed | CD300A    | protein_cc chr17 | 72462555 | 72480933 | + | 2684  | 717.0024 | 0        | -0.83173 | 0.181521 | -4.58199 | 1.34E-05 | 0.000474 | 0.353526 |
| ENSG0000 | mucosal h | Inflamed | CSF2RB    | protein_cc chr22 | 37309670 | 37336491 | + | 5061  | 4896.308 | 0        | -1.28781 | 0.281149 | -4.58053 | 1.35E-05 | 0.000476 | 0.355565 |
| ENSG0000 | mucosal h | Inflamed | REP15     | protein_cc chr12 | 27849428 | 27850566 | + | 1139  | 643.5084 | 0        | 1.332913 | 0.291022 | 4.580113 | 1.35E-05 | 0.000476 | 0.356148 |
| ENSG0000 | mucosal h | Inflamed | IGLV3-12  | IG_V_gene chr22  | 23114317 | 23115079 | + | 360   | 69.70883 | 0.045346 | -1.61676 | 0.353024 | -4.57973 | 1.36E-05 | 0.000476 | 0.356686 |
| ENSG0000 | mucosal h | Inflamed | PGAP3     | protein_cc chr17 | 37827375 | 37853050 | - | 3669  | 2334.819 | 0        | 0.681296 | 0.148822 | 4.577938 | 1.37E-05 | 0.000479 | 0.359215 |
| ENSG0000 | mucosal h | Inflamed | TNFRSF17  | protein_cc chr16 | 12058964 | 12061925 | + | 1118  | 458.7064 | 0        | -1.25193 | 0.273565 | -4.57634 | 1.37E-05 | 0.000481 | 0.361487 |
| ENSG0000 | mucosal h | Inflamed | ABI3      | protein_cc chr17 | 47287589 | 47300587 | + | 2456  | 1026.029 | 0        | -0.65821 | 0.14383  | -4.57628 | 1.38E-05 | 0.000481 | 0.361569 |
| ENSG0000 | mucosal h | Inflamed | FGFR3     | protein_cc chr4  | 1795034  | 1810599  | + | 4834  | 1824.064 | 0        | 1.059993 | 0.231813 | 4.572612 | 1.40E-05 | 0.000487 | 0.366833 |
| ENSG0000 | mucosal h | Inflamed | LINC00942 | lincRNA chr12    | 1609691  | 1616484  | - | 2417  | 2.145585 | 0.553699 | 0.803558 | 0.175746 | 4.57227  | 1.40E-05 | 0.000487 | 0.367327 |
| ENSG0000 | mucosal h | Inflamed | SPNS2     | protein_cc chr17 | 4402133  | 4442330  | + | 4111  | 3640.58  | 0        | -0.96231 | 0.21047  | -4.57222 | 1.40E-05 | 0.000487 | 0.367405 |
| ENSG0000 | mucosal h | Inflamed | OLFML2B   | protein_cc chr1  | 1.62E+08 | 1.62E+08 | - | 3415  | 833.6158 | 0        | -1.31353 | 0.287335 | -4.57142 | 1.40E-05 | 0.000488 | 0.368559 |
| ENSG0000 | mucosal h | Inflamed | IRF1      | protein_cc chr5  | 1.32E+08 | 1.32E+08 | - | 7799  | 8984.632 | 0        | -0.75417 | 0.165047 | -4.56943 | 1.41E-05 | 0.000491 | 0.371459 |
| ENSG0000 | mucosal h | Inflamed | RP11-680F | antisense chr15  | 29967194 | 29973161 | + | 2736  | 108.3699 | 0        | 1.091791 | 0.239031 | 4.567561 | 1.42E-05 | 0.000494 | 0.374201 |
| ENSG0000 | mucosal h | Inflamed | IGKV1D-17 | IG_V_gene chr2   | 90121477 | 90122133 | + | 532   | 245.8329 | 0.164678 | -1.72835 | 0.37846  | -4.56679 | 1.43E-05 | 0.000495 | 0.375343 |
| ENSG0000 | mucosal h | Inflamed | ADAMTS4   | protein_cc chr1  | 1.61E+08 | 1.61E+08 | - | 10334 | 734.3628 | 0.00716  | -1.76267 | 0.386052 | -4.56588 | 1.43E-05 | 0.000495 | 0.376685 |
| ENSG0000 | mucosal h | Inflamed | LIMK1     | protein_cc chr7  | 73497263 | 73536855 | + | 6902  | 1914.938 | 0        | -0.64662 | 0.141621 | -4.56587 | 1.43E-05 | 0.000495 | 0.376703 |
| ENSG0000 | mucosal h | Inflamed | TRPV2     | protein_cc chr17 | 16318856 | 16340317 | + | 3414  | 1010.11  | 0        | -0.80197 | 0.175651 | -4.56569 | 1.43E-05 | 0.000495 | 0.376966 |
| ENSG0000 | mucosal h | Inflamed | MT-ND4    | protein_cc chrM  | 10760    | 12137    | + | 1378  | 936839   | 0        | 0.601444 | 0.13174  | 4.565384 | 1.44E-05 | 0.000495 | 0.377422 |
| ENSG0000 | mucosal h | Inflamed | CYBA      | protein_cc chr16 | 88709691 | 88717560 | - | 3357  | 9033.723 | 0        | -0.61255 | 0.134201 | -4.56442 | 1.44E-05 | 0.000496 | 0.378852 |
| ENSG0000 | mucosal h | Inflamed | IGHV3-22  | IG_V_pseu chr14  | 1.07E+08 | 1.07E+08 | - | 359   | 8.181384 | 0.159905 | -1.11122 | 0.243504 | -4.56345 | 1.45E-05 | 0.000497 | 0.380311 |
| ENSG0000 | mucosal h | Inflamed | IRF4      | protein_cc chr6  | 391739   | 411447   | + | 5898  | 3783.876 | 0        | -1.35822 | 0.297707 | -4.56227 | 1.45E-05 | 0.000499 | 0.382079 |
| ENSG0000 | mucosal h | Inflamed | FLI1-AS1  | antisense chr11  | 1.29E+08 | 1.29E+08 | - | 1298  | 36.56563 | 0.002387 | -0.89213 | 0.195605 | -4.56087 | 1.46E-05 | 0.000501 | 0.384192 |
| ENSG0000 | mucosal h | Inflamed | RP11-175C | antisense chr9   | 1.28E+08 | 1.28E+08 | + | 617   | 2.083532 | 0.51074  | 0.568458 | 0.124646 | 4.560586 | 1.46E-05 | 0.000501 | 0.384615 |
| ENSG0000 | mucosal h | Inflamed | HAVCR1    | protein_cc chr5  | 1.56E+08 | 1.56E+08 | - | 2151  | 78.06444 | 0.045346 | 1.516627 | 0.332593 | 4.560007 | 1.47E-05 | 0.000501 | 0.385491 |
| ENSG0000 | mucosal h | Inflamed | SELENBP1  | protein_cc chr1  | 1.51E+08 | 1.51E+08 | - | 3504  | 20717.5  | 0        | 1.183878 | 0.259669 | 4.559172 | 1.47E-05 | 0.000502 | 0.386759 |
| ENSG0000 | mucosal h | Inflamed | GPR4      | protein_cc chr19 | 46093022 | 46105466 | - | 3145  | 313.0286 | 0.002387 | -1.445   | 0.317069 | -4.55736 | 1.48E-05 | 0.000505 | 0.389528 |
| ENSG0000 | mucosal h | Inflamed | VNN2      | protein_cc chr6  | 1.33E+08 | 1.33E+08 | - | 2633  | 414.8616 | 0        | -1.67461 | 0.367521 | -4.55649 | 1.49E-05 | 0.000506 | 0.390858 |
| ENSG0000 | mucosal h | Inflamed | LINC00525 | antisense chr7   | 47801074 | 47806370 | + | 1212  | 18.92363 | 0.140811 | -1.4382  | 0.315713 | -4.55541 | 1.49E-05 | 0.000508 | 0.392524 |
| ENSG0000 | mucosal h | Inflamed | S1PR4     | protein_cc chr19 | 3172344  | 3180329  | + | 1693  | 348.3938 | 0        | -1.32381 | 0.290639 | -4.55482 | 1.50E-05 | 0.000508 | 0.393434 |
| ENSG0000 | mucosal h | Inflamed | PGLYRP2   | protein_cc chr19 | 15579456 | 15609767 | - | 3188  | 8.539379 | 0.095465 | -0.9877  | 0.216884 | -4.55404 | 1.50E-05 | 0.000509 | 0.394647 |
| ENSG0000 | mucosal h | Inflamed | PDCD4     | protein_cc chr10 | 1.13E+08 | 1.13E+08 | + | 4535  | 7016.914 | 0        | 0.989222 | 0.217231 | 4.553778 | 1.50E-05 | 0.000509 | 0.395047 |
| ENSG0000 | mucosal h | Inflamed | SNX20     | protein_cc chr16 | 50700211 | 50715264 | - | 5754  | 769.7208 | 0        | -1.03175 | 0.226596 | -4.55327 | 1.51E-05 | 0.000509 | 0.395837 |
| ENSG0000 | mucosal h | Inflamed | PPIB      | protein_cc chr15 | 64448011 | 64455404 | - | 1911  | 10864.84 | 0        | -0.57491 | 0.126305 | -4.5518  | 1.51E-05 | 0.000512 | 0.398135 |
| ENSG0000 | mucosal h | Inflamed | SEC11C    | protein_cc chr18 | 56806709 | 56826068 | + | 3656  | 2138.809 | 0        | -0.72539 | 0.159388 | -4.55106 | 1.52E-05 | 0.000512 | 0.399286 |
| ENSG0000 | mucosal h | Inflamed | THSD4     | protein_cc chr15 | 71389291 | 72075722 | + | 15803 | 1702.659 | 0        | 0.991977 | 0.217966 | 4.55106  | 1.52E-05 | 0.000512 | 0.399289 |

|          |           |          |           |            |       |          |          |   |       |          |          |          |          |          |          |          |          |
|----------|-----------|----------|-----------|------------|-------|----------|----------|---|-------|----------|----------|----------|----------|----------|----------|----------|----------|
| ENSG0000 | mucosal h | Inflamed | SIGLEC7   | protein_cc | chr19 | 51645556 | 51656783 | + | 2043  | 181.0406 | 0        | -0.81036 | 0.178099 | -4.55005 | 1.52E-05 | 0.000513 | 0.400879 |
| ENSG0000 | mucosal h | Inflamed | AC079602  | protein_cc | chr12 | 1.21E+08 | 1.21E+08 | - | 2455  | 391.7327 | 0.009547 | 1.632067 | 0.358832 | 4.548275 | 1.54E-05 | 0.000516 | 0.40368  |
| ENSG0000 | mucosal h | Inflamed | ISL2      | protein_cc | chr15 | 76629065 | 76634817 | + | 2221  | 73.78043 | 0.002387 | -0.95773 | 0.210578 | -4.54813 | 1.54E-05 | 0.000516 | 0.403907 |
| ENSG0000 | mucosal h | Inflamed | GYPC      | protein_cc | chr2  | 1.27E+08 | 1.27E+08 | + | 3237  | 786.1933 | 0        | -0.97653 | 0.215035 | -4.54128 | 1.58E-05 | 0.000529 | 0.41492  |
| ENSG0000 | mucosal h | Inflamed | RP11-695J | antisense  | chr12 | 14720684 | 14772689 | + | 596   | 38.33652 | 0.01432  | 0.693905 | 0.152802 | 4.541216 | 1.58E-05 | 0.000529 | 0.415022 |
| ENSG0000 | mucosal h | Inflamed | MEOX1     | protein_cc | chr17 | 41717756 | 41739322 | - | 2707  | 455.7255 | 0        | -1.21849 | 0.268349 | -4.54069 | 1.58E-05 | 0.000529 | 0.415872 |
| ENSG0000 | mucosal h | Inflamed | IGLV5-48  | IG_V_gene  | chr22 | 22707289 | 22707781 | + | 369   | 67.36993 | 0.026253 | -1.64534 | 0.362449 | -4.53951 | 1.59E-05 | 0.000531 | 0.417803 |
| ENSG0000 | mucosal h | Inflamed | KIAA1199  | protein_cc | chr15 | 81071684 | 81244117 | + | 7621  | 4416.494 | 0.002387 | -2.2289  | 0.491153 | -4.5381  | 1.60E-05 | 0.000533 | 0.420117 |
| ENSG0000 | mucosal h | Inflamed | SLC46A2   | protein_cc | chr9  | 1.16E+08 | 1.16E+08 | - | 2502  | 9.50358  | 0.169451 | -1.06862 | 0.235528 | -4.53715 | 1.60E-05 | 0.000534 | 0.421696 |
| ENSG0000 | mucosal h | Inflamed | KLK1      | protein_cc | chr19 | 51322404 | 51327043 | - | 2378  | 2638.396 | 0        | 1.34194  | 0.296052 | 4.532782 | 1.63E-05 | 0.000543 | 0.428975 |
| ENSG0000 | mucosal h | Inflamed | HLA-B     | protein_cc | chr6  | 31321649 | 31324965 | - | 3012  | 102666.4 | 0        | -0.39226 | 0.086588 | -4.53014 | 1.65E-05 | 0.000548 | 0.433434 |
| ENSG0000 | mucosal h | Inflamed | DARC      | protein_cc | chr1  | 1.59E+08 | 1.59E+08 | + | 1954  | 942.7637 | 0        | -1.27301 | 0.281113 | -4.52846 | 1.66E-05 | 0.000551 | 0.436309 |
| ENSG0000 | mucosal h | Inflamed | RP11-120k | sense_intr | chr13 | 1.14E+08 | 1.14E+08 | + | 649   | 3.572792 | 0.334129 | 0.778855 | 0.172074 | 4.526288 | 1.67E-05 | 0.000555 | 0.440029 |
| ENSG0000 | mucosal h | Inflamed | CHKA      | protein_cc | chr11 | 67820326 | 67888911 | - | 3877  | 1539.971 | 0        | 0.688935 | 0.152266 | 4.524539 | 1.69E-05 | 0.000558 | 0.443053 |
| ENSG0000 | mucosal h | Inflamed | RP11-466A | sense_intr | chr17 | 30856026 | 30857067 | - | 475   | 0.947494 | 0.754177 | 0.548218 | 0.121198 | 4.523313 | 1.69E-05 | 0.00056  | 0.445185 |
| ENSG0000 | mucosal h | Inflamed | KLK7      | protein_cc | chr19 | 51479729 | 51487355 | - | 2443  | 218.1742 | 0.470167 | -3.30296 | 0.730917 | -4.51892 | 1.72E-05 | 0.000569 | 0.452896 |
| ENSG0000 | mucosal h | Inflamed | FTSJ1     | protein_cc | chrX  | 48334541 | 48344752 | + | 2740  | 1114.723 | 0        | -0.37309 | 0.082576 | -4.51816 | 1.73E-05 | 0.00057  | 0.454255 |
| ENSG0000 | mucosal h | Inflamed | CYP3A7    | protein_cc | chr7  | 99302660 | 99332819 | - | 3531  | 10.67542 | 0.133652 | 1.032088 | 0.228471 | 4.51737  | 1.73E-05 | 0.000571 | 0.455658 |
| ENSG0000 | mucosal h | Inflamed | HMGCS2    | protein_cc | chr1  | 1.2E+08  | 1.2E+08  | - | 2571  | 14553.19 | 0        | 2.514807 | 0.556863 | 4.516022 | 1.74E-05 | 0.000573 | 0.458067 |
| ENSG0000 | mucosal h | Inflamed | PTPN21    | protein_cc | chr14 | 88932122 | 89021077 | - | 7396  | 1421.931 | 0        | 0.793361 | 0.175722 | 4.514876 | 1.75E-05 | 0.000575 | 0.460124 |
| ENSG0000 | mucosal h | Inflamed | JAK3      | protein_cc | chr19 | 17935589 | 17958880 | - | 6813  | 2315.53  | 0        | -1.21726 | 0.269715 | -4.51315 | 1.76E-05 | 0.000578 | 0.46323  |
| ENSG0000 | mucosal h | Inflamed | AC092902  | miRNA      | chr3  | 1.26E+08 | 1.26E+08 | - | 100   | 0.921241 | 0.742243 | 0.535512 | 0.118659 | 4.513024 | 1.76E-05 | 0.000578 | 0.463467 |
| ENSG0000 | mucosal h | Inflamed | RP11-125E | antisense  | chr9  | 2422702  | 2641395  | - | 4399  | 13.04535 | 0.221957 | 1.311734 | 0.290757 | 4.511441 | 1.77E-05 | 0.000581 | 0.466344 |
| ENSG0000 | mucosal h | Inflamed | SEMA5A    | protein_cc | chr5  | 9035138  | 9546187  | - | 12097 | 2079.568 | 0        | 0.899377 | 0.199382 | 4.510824 | 1.78E-05 | 0.000581 | 0.46747  |
| ENSG0000 | mucosal h | Inflamed | IGLV1-44  | IG_V_gene  | chr22 | 22735135 | 22735715 | + | 466   | 15484.54 | 0        | -1.74735 | 0.387444 | -4.50994 | 1.78E-05 | 0.000583 | 0.469096 |
| ENSG0000 | mucosal h | Inflamed | ECSCR     | protein_cc | chr5  | 1.39E+08 | 1.39E+08 | - | 740   | 147.1814 | 0.002387 | -1.13048 | 0.250734 | -4.50868 | 1.79E-05 | 0.000584 | 0.471405 |
| ENSG0000 | mucosal h | Inflamed | CCDC3     | protein_cc | chr10 | 12938627 | 13141652 | - | 3681  | 826.0286 | 0        | -1.36086 | 0.301836 | -4.50861 | 1.79E-05 | 0.000584 | 0.471533 |
| ENSG0000 | mucosal h | Inflamed | RGS19     | protein_cc | chr20 | 62704534 | 62711323 | - | 2010  | 818.6826 | 0        | -0.93587 | 0.207611 | -4.5078  | 1.80E-05 | 0.000585 | 0.473032 |
| ENSG0000 | mucosal h | Inflamed | RP11-507k | antisense  | chr14 | 89017941 | 89018837 | + | 718   | 6.431981 | 0.109785 | 0.719582 | 0.159657 | 4.507044 | 1.80E-05 | 0.000586 | 0.474426 |
| ENSG0000 | mucosal h | Inflamed | NRARP     | protein_cc | chr9  | 1.4E+08  | 1.4E+08  | - | 2621  | 5543.547 | 0        | 0.806562 | 0.178983 | 4.506357 | 1.81E-05 | 0.000587 | 0.4757   |
| ENSG0000 | mucosal h | Inflamed | KMO       | protein_cc | chr1  | 2.42E+08 | 2.42E+08 | + | 5946  | 87.57041 | 0.004773 | -1.19539 | 0.26528  | -4.50615 | 1.81E-05 | 0.000587 | 0.476082 |
| ENSG0000 | mucosal h | Inflamed | CTB-134H  | pseudoger  | chr16 | 29065053 | 29119429 | - | 2180  | 53.09547 | 0.011933 | 1.336764 | 0.296779 | 4.504246 | 1.82E-05 | 0.000591 | 0.479638 |
| ENSG0000 | mucosal h | Inflamed | MCHR1     | protein_cc | chr22 | 41074754 | 41078818 | + | 2961  | 16.53461 | 0.088305 | -1.21089 | 0.268903 | -4.50307 | 1.83E-05 | 0.000593 | 0.481837 |
| ENSG0000 | mucosal h | Inflamed | RP11-511l | antisense  | chr1  | 47846600 | 47874149 | - | 483   | 16.01909 | 0.155131 | 1.070848 | 0.237833 | 4.502518 | 1.84E-05 | 0.000593 | 0.482885 |
| ENSG0000 | mucosal h | Inflamed | RP11-575l | lincRNA    | chr9  | 27829274 | 27844479 | + | 2084  | 1.854415 | 0.620525 | 0.56576  | 0.125672 | 4.501885 | 1.84E-05 | 0.000594 | 0.484081 |
| ENSG0000 | mucosal h | Inflamed | IGHV3-48  | IG_V_gene  | chr14 | 1.07E+08 | 1.07E+08 | - | 430   | 7492.358 | 0        | -1.67213 | 0.371511 | -4.5009  | 1.85E-05 | 0.000596 | 0.485949 |
| ENSG0000 | mucosal h | Inflamed | RP11-443E | lincRNA    | chr1  | 2.35E+08 | 2.35E+08 | - | 846   | 5.584726 | 0.212411 | -0.92935 | 0.206542 | -4.49958 | 1.86E-05 | 0.000598 | 0.488454 |
| ENSG0000 | mucosal h | Inflamed | TESK2     | protein_cc | chr1  | 45809555 | 45956872 | - | 3460  | 541.4821 | 0        | 0.445616 | 0.099044 | 4.499181 | 1.86E-05 | 0.000598 | 0.489216 |
| ENSG0000 | mucosal h | Inflamed | CASR      | protein_cc | chr3  | 1.22E+08 | 1.22E+08 | + | 5390  | 26.54893 | 0.02864  | 1.06652  | 0.237063 | 4.498889 | 1.86E-05 | 0.000598 | 0.489774 |
| ENSG0000 | mucosal h | Inflamed | MMP1      | protein_cc | chr11 | 1.03E+08 | 1.03E+08 | - | 1970  | 4548.446 | 0        | -2.307   | 0.512849 | -4.4984  | 1.87E-05 | 0.000598 | 0.490714 |



|          |           |          |           |            |       |          |          |   |       |          |          |          |          |          |          |          |          |
|----------|-----------|----------|-----------|------------|-------|----------|----------|---|-------|----------|----------|----------|----------|----------|----------|----------|----------|
| ENSG0000 | mucosal h | Inflamed | AC121251  | pseudoger  | chr3  | 23431152 | 23431400 | - | 249   | 4.73747  | 0.310263 | -0.97666 | 0.217168 | -4.49724 | 1.87E-05 | 0.0006   | 0.492935 |
| ENSG0000 | mucosal h | Inflamed | TMEM255   | protein_cc | chr13 | 1.14E+08 | 1.15E+08 | + | 2242  | 134.8711 | 0        | -0.97434 | 0.216679 | -4.4967  | 1.88E-05 | 0.000601 | 0.493968 |
| ENSG0000 | mucosal h | Inflamed | EFCAB4B   | protein_cc | chr12 | 3715799  | 3873985  | - | 12466 | 1770.432 | 0        | 0.968767 | 0.215589 | 4.493588 | 1.90E-05 | 0.000608 | 0.500006 |
| ENSG0000 | mucosal h | Inflamed | CXCR3     | protein_cc | chrX  | 70835766 | 70838367 | - | 1868  | 341.9857 | 0        | -0.68896 | 0.153412 | -4.4909  | 1.92E-05 | 0.000613 | 0.505279 |
| ENSG0000 | mucosal h | Inflamed | MEF2B     | protein_cc | chr19 | 19256377 | 19303400 | - | 2724  | 54.1074  | 0        | -0.97265 | 0.216594 | -4.49066 | 1.92E-05 | 0.000613 | 0.505749 |
| ENSG0000 | mucosal h | Inflamed | GLYATL3   | protein_cc | chr6  | 49467671 | 49494760 | + | 1124  | 1.880668 | 0.649165 | 0.724469 | 0.161391 | 4.4889   | 1.94E-05 | 0.000617 | 0.509229 |
| ENSG0000 | mucosal h | Inflamed | PLAUR     | protein_cc | chr19 | 44150247 | 44174699 | - | 4457  | 3315.957 | 0        | -1.03315 | 0.230181 | -4.48842 | 1.94E-05 | 0.000617 | 0.510178 |
| ENSG0000 | mucosal h | Inflamed | AC072052  | pseudoger  | chr7  | 6530424  | 6530729  | - | 306   | 5.947494 | 0.212411 | 0.874112 | 0.194831 | 4.486511 | 1.96E-05 | 0.000621 | 0.513991 |
| ENSG0000 | mucosal h | Inflamed | GLTP      | protein_cc | chr12 | 1.1E+08  | 1.1E+08  | - | 2696  | 2408.749 | 0        | 0.51001  | 0.113714 | 4.485027 | 1.97E-05 | 0.000624 | 0.51697  |
| ENSG0000 | mucosal h | Inflamed | LRFN2     | protein_cc | chr6  | 40359325 | 40555204 | - | 3270  | 4.811456 | 0.343675 | 0.915981 | 0.204266 | 4.484262 | 1.97E-05 | 0.000625 | 0.518512 |
| ENSG0000 | mucosal h | Inflamed | MYBL2     | protein_cc | chr20 | 42295754 | 42345136 | + | 2682  | 1627.647 | 0        | -0.67483 | 0.150502 | -4.48387 | 1.98E-05 | 0.000625 | 0.519296 |
| ENSG0000 | mucosal h | Inflamed | CLDN2     | protein_cc | chrX  | 1.06E+08 | 1.06E+08 | + | 3410  | 1141.337 | 0.00716  | -1.88018 | 0.419414 | -4.48287 | 1.98E-05 | 0.000627 | 0.521326 |
| ENSG0000 | mucosal h | Inflamed | GATA6-AS  | lincRNA    | chr18 | 19746859 | 19748929 | - | 1823  | 136.9952 | 0.004773 | 1.293211 | 0.288586 | 4.481206 | 2.00E-05 | 0.00063  | 0.524721 |
| ENSG0000 | mucosal h | Inflamed | RP11-644F | protein_cc | chr12 | 56109820 | 56118487 | + | 3510  | 210.5632 | 0        | 0.911591 | 0.203437 | 4.480955 | 2.00E-05 | 0.00063  | 0.525234 |
| ENSG0000 | mucosal h | Inflamed | UGT1A13F  | pseudoger  | chr2  | 2.35E+08 | 2.35E+08 | + | 762   | 1.732697 | 0.642005 | 0.680262 | 0.151864 | 4.479418 | 2.01E-05 | 0.000633 | 0.528385 |
| ENSG0000 | mucosal h | Inflamed | CTC-338M  | lincRNA    | chr5  | 1.81E+08 | 1.81E+08 | + | 549   | 1.558473 | 0.613365 | 0.607945 | 0.135732 | 4.479006 | 2.01E-05 | 0.000633 | 0.529232 |
| ENSG0000 | mucosal h | Inflamed | PPP1R18   | protein_cc | chr6  | 30644166 | 30655672 | - | 4599  | 3992.143 | 0        | -0.95503 | 0.213241 | -4.47866 | 2.02E-05 | 0.000633 | 0.529952 |
| ENSG0000 | mucosal h | Inflamed | RP11-491F | antisense  | chr16 | 49321341 | 49324138 | + | 654   | 7.933174 | 0.145585 | 0.881632 | 0.196875 | 4.478134 | 2.02E-05 | 0.000634 | 0.531033 |
| ENSG0000 | mucosal h | Inflamed | IGKV1-13  | IG_V_pseu  | chr2  | 89345492 | 89345963 | - | 347   | 34.05251 | 0.145585 | -1.55207 | 0.346664 | -4.47716 | 2.03E-05 | 0.000635 | 0.533059 |
| ENSG0000 | mucosal h | Inflamed | IGKV1D-13 | IG_V_gene  | chr2  | 90192768 | 90193424 | + | 531   | 1949.895 | 0.004773 | -1.91309 | 0.427505 | -4.47502 | 2.04E-05 | 0.00064  | 0.537506 |
| ENSG0000 | mucosal h | Inflamed | COX4I2    | protein_cc | chr20 | 30225691 | 30232809 | + | 693   | 51.20048 | 0.004773 | -1.06283 | 0.237648 | -4.47229 | 2.07E-05 | 0.000646 | 0.543235 |
| ENSG0000 | mucosal h | Inflamed | MGP       | protein_cc | chr12 | 15034115 | 15038860 | - | 2639  | 891.2745 | 0        | -1.34482 | 0.300711 | -4.47213 | 2.07E-05 | 0.000646 | 0.543583 |
| ENSG0000 | mucosal h | Inflamed | MAPK11    | protein_cc | chr22 | 50702142 | 50709196 | - | 3321  | 350.1002 | 0        | -1.03244 | 0.230959 | -4.47022 | 2.08E-05 | 0.00065  | 0.547635 |
| ENSG0000 | mucosal h | Inflamed | S1PR5     | protein_cc | chr19 | 10623623 | 10628607 | - | 2601  | 38.53938 | 0.019093 | -1.19388 | 0.267111 | -4.46962 | 2.09E-05 | 0.00065  | 0.548919 |
| ENSG0000 | mucosal h | Inflamed | HCK       | protein_cc | chr20 | 30639991 | 30689659 | + | 3092  | 1886.279 | 0        | -0.98451 | 0.220306 | -4.46884 | 2.09E-05 | 0.000651 | 0.550589 |
| ENSG0000 | mucosal h | Inflamed | PSMB10    | protein_cc | chr16 | 67968405 | 67970990 | - | 1853  | 1714.859 | 0        | -0.47826 | 0.107023 | -4.46874 | 2.10E-05 | 0.000651 | 0.550784 |
| ENSG0000 | mucosal h | Inflamed | GALNT12   | protein_cc | chr9  | 1.02E+08 | 1.02E+08 | + | 2824  | 3677.613 | 0        | 1.156879 | 0.258924 | 4.468024 | 2.10E-05 | 0.000652 | 0.552326 |
| ENSG0000 | mucosal h | Inflamed | EMR2      | protein_cc | chr19 | 14843205 | 14889353 | - | 8622  | 1545.389 | 0        | -1.20606 | 0.269954 | -4.46765 | 2.10E-05 | 0.000652 | 0.553128 |
| ENSG0000 | mucosal h | Inflamed | IGLV3-24  | IG_V_pseu  | chr22 | 23036924 | 23037437 | + | 197   | 7.229117 | 0.329356 | -1.18796 | 0.265925 | -4.46729 | 2.11E-05 | 0.000652 | 0.553905 |
| ENSG0000 | mucosal h | Inflamed | PRDX6     | protein_cc | chr1  | 1.73E+08 | 1.73E+08 | + | 2367  | 11467.15 | 0        | 0.726349 | 0.162644 | 4.465888 | 2.12E-05 | 0.000655 | 0.556932 |
| ENSG0000 | mucosal h | Inflamed | H19       | processed  | chr11 | 2016406  | 2022700  | - | 2812  | 672.0859 | 0.004773 | -1.80369 | 0.403968 | -4.46494 | 2.13E-05 | 0.000657 | 0.558983 |
| ENSG0000 | mucosal h | Inflamed | PTGES     | protein_cc | chr9  | 1.33E+08 | 1.33E+08 | - | 1896  | 176.2291 | 0        | -1.40571 | 0.314869 | -4.46441 | 2.13E-05 | 0.000657 | 0.560128 |
| ENSG0000 | mucosal h | Inflamed | MT-TM     | Mt_tRNA    | chrM  | 4402     | 4469     | + | 68    | 373.3413 | 0        | 0.992302 | 0.222298 | 4.463843 | 2.14E-05 | 0.000658 | 0.561373 |
| ENSG0000 | mucosal h | Inflamed | VLDLR     | protein_cc | chr9  | 2621834  | 2660053  | + | 9339  | 252.7685 | 0        | 1.021152 | 0.228791 | 4.463247 | 2.14E-05 | 0.000659 | 0.562675 |
| ENSG0000 | mucosal h | Inflamed | ZG16      | protein_cc | chr16 | 29789561 | 29793096 | + | 1934  | 30948.41 | 0        | 2.464658 | 0.55238  | 4.461885 | 2.15E-05 | 0.000662 | 0.56566  |
| ENSG0000 | mucosal h | Inflamed | ACKR4     | protein_cc | chr3  | 1.32E+08 | 1.32E+08 | + | 2273  | 88.51074 | 0.009547 | -1.38939 | 0.311438 | -4.4612  | 2.16E-05 | 0.000662 | 0.567168 |
| ENSG0000 | mucosal h | Inflamed | MS4A3     | protein_cc | chr11 | 59824060 | 59838601 | + | 2095  | 3.639618 | 0.410501 | -0.81263 | 0.182157 | -4.46112 | 2.16E-05 | 0.000662 | 0.567336 |
| ENSG0000 | mucosal h | Inflamed | F11R      | protein_cc | chr1  | 1.61E+08 | 1.61E+08 | - | 2114  | 9.071599 | 0.102625 | 0.800232 | 0.179398 | 4.460651 | 2.16E-05 | 0.000662 | 0.568376 |
| ENSG0000 | mucosal h | Inflamed | HMGA2     | protein_cc | chr12 | 66217911 | 66360075 | + | 14808 | 169.9642 | 0.002387 | 1.040917 | 0.23346  | 4.45865  | 2.18E-05 | 0.000665 | 0.572809 |
| ENSG0000 | mucosal h | Inflamed | IGHV2-70  | IG_V_gene  | chr14 | 1.07E+08 | 1.07E+08 | - | 433   | 4440.604 | 0.009547 | -1.86698 | 0.418747 | -4.45849 | 2.18E-05 | 0.000665 | 0.573158 |

|          |           |          |            |             |       |          |          |   |      |          |          |          |          |          |          |          |          |
|----------|-----------|----------|------------|-------------|-------|----------|----------|---|------|----------|----------|----------|----------|----------|----------|----------|----------|
| ENSG0000 | mucosal h | Inflamed | ENPP7P11   | pseudoger   | chr4  | 9678932  | 9679558  | + | 627  | 65.11933 | 0.02864  | 1.663489 | 0.373109 | 4.458451 | 2.18E-05 | 0.000665 | 0.57325  |
| ENSG0000 | mucosal h | Inflamed | SERPING1   | protein_cc  | chr11 | 57364860 | 57382326 | + | 3603 | 6577.623 | 0        | -1.01646 | 0.227988 | -4.45838 | 2.18E-05 | 0.000665 | 0.573402 |
| ENSG0000 | mucosal h | Inflamed | PDZK1IP1   | protein_cc  | chr1  | 47649265 | 47656716 | - | 1438 | 5309.575 | 0        | -1.4609  | 0.327704 | -4.45799 | 2.18E-05 | 0.000665 | 0.574274 |
| ENSG0000 | mucosal h | Inflamed | RNF125     | protein_cc  | chr18 | 29598335 | 29653176 | + | 6508 | 660.4821 | 0        | 0.87467  | 0.196235 | 4.457261 | 2.19E-05 | 0.000667 | 0.575905 |
| ENSG0000 | mucosal h | Inflamed | IGLV3-25   | IG_V_gene   | chr22 | 23029190 | 23029735 | + | 380  | 6859.384 | 0        | -1.81009 | 0.406149 | -4.45671 | 2.20E-05 | 0.000667 | 0.577147 |
| ENSG0000 | mucosal h | Inflamed | SLC6A14    | protein_cc  | chrX  | 1.16E+08 | 1.16E+08 | + | 4521 | 2098.069 | 0.002387 | -2.22834 | 0.5001   | -4.4558  | 2.20E-05 | 0.000669 | 0.579189 |
| ENSG0000 | mucosal h | Inflamed | RNU6-343   | snRNA       | chr12 | 56982302 | 56982405 | + | 104  | 2.047733 | 0.453461 | 0.668427 | 0.150082 | 4.45375  | 2.22E-05 | 0.000673 | 0.583803 |
| ENSG0000 | mucosal h | Inflamed | RELT       | protein_cc  | chr11 | 73087309 | 73108519 | + | 6322 | 669.7947 | 0        | -0.89563 | 0.2012   | -4.45143 | 2.24E-05 | 0.000679 | 0.589078 |
| ENSG0000 | mucosal h | Inflamed | NAAA       | protein_cc  | chr4  | 76831809 | 76862204 | - | 5154 | 2428.831 | 0        | 0.717609 | 0.161227 | 4.450925 | 2.25E-05 | 0.000679 | 0.590236 |
| ENSG0000 | mucosal h | Inflamed | FRMD1      | protein_cc  | chr6  | 1.68E+08 | 1.68E+08 | - | 5788 | 1189.621 | 0.00716  | 2.03253  | 0.456781 | 4.449685 | 2.26E-05 | 0.000682 | 0.593081 |
| ENSG0000 | mucosal h | Inflamed | BAG1       | protein_cc  | chr9  | 33247818 | 33264761 | - | 7108 | 3422.721 | 0        | 0.437425 | 0.098337 | 4.448209 | 2.27E-05 | 0.000685 | 0.596483 |
| ENSG0000 | mucosal h | Inflamed | DNAJC5B    | protein_cc  | chr8  | 66933795 | 67012751 | + | 2927 | 26.39618 | 0.011933 | -0.9464  | 0.21278  | -4.44778 | 2.27E-05 | 0.000685 | 0.597469 |
| ENSG0000 | mucosal h | Inflamed | IGHV3-13   | IG_V_gene   | chr14 | 1.07E+08 | 1.07E+08 | - | 428  | 1384.322 | 0.002387 | -1.63894 | 0.368504 | -4.44754 | 2.27E-05 | 0.000685 | 0.598027 |
| ENSG0000 | mucosal h | Inflamed | DUSP4      | protein_cc  | chr8  | 29190581 | 29208185 | - | 7257 | 816.9069 | 0        | -1.16161 | 0.261307 | -4.44537 | 2.29E-05 | 0.00069  | 0.603074 |
| ENSG0000 | mucosal h | Inflamed | RP11-8L2.1 | processed_c | chr4  | 84717589 | 85214565 | - | 3588 | 2.610979 | 0.570406 | 0.728574 | 0.163912 | 4.444901 | 2.30E-05 | 0.00069  | 0.60418  |
| ENSG0000 | mucosal h | Inflamed | TTC9       | protein_cc  | chr14 | 71108504 | 71142077 | + | 5217 | 443.1838 | 0        | -1.14065 | 0.256696 | -4.44358 | 2.31E-05 | 0.000693 | 0.607269 |
| ENSG0000 | mucosal h | Inflamed | CLEC4D     | protein_cc  | chr12 | 8662071  | 8674962  | + | 2013 | 31.95465 | 0.26253  | -1.88751 | 0.424797 | -4.44333 | 2.31E-05 | 0.000693 | 0.607859 |
| ENSG0000 | mucosal h | Inflamed | NTRK1      | protein_cc  | chr1  | 1.57E+08 | 1.57E+08 | + | 4356 | 42.69212 | 0.01432  | -0.9524  | 0.214408 | -4.44201 | 2.32E-05 | 0.000696 | 0.610986 |
| ENSG0000 | mucosal h | Inflamed | ULBP2      | protein_cc  | chr6  | 1.5E+08  | 1.5E+08  | + | 1349 | 10.57518 | 0.116945 | -1.12764 | 0.253867 | -4.44185 | 2.33E-05 | 0.000696 | 0.611375 |
| ENSG0000 | mucosal h | Inflamed | EFCAB5     | protein_cc  | chr17 | 28256218 | 28435470 | + | 6928 | 21.24344 | 0.01432  | 0.908487 | 0.204591 | 4.440493 | 2.34E-05 | 0.000698 | 0.614584 |
| ENSG0000 | mucosal h | Inflamed | IGLV3-27   | IG_V_gene   | chr22 | 23010758 | 23011276 | + | 377  | 712.1408 | 0.002387 | -1.74725 | 0.393731 | -4.43767 | 2.36E-05 | 0.000705 | 0.621346 |
| ENSG0000 | mucosal h | Inflamed | PDCD1      | protein_cc  | chr2  | 2.43E+08 | 2.43E+08 | - | 2114 | 270.136  | 0        | -1.14776 | 0.258672 | -4.4371  | 2.37E-05 | 0.000706 | 0.622709 |
| ENSG0000 | mucosal h | Inflamed | APOL2      | protein_cc  | chr22 | 36622256 | 36636000 | - | 3477 | 3123.263 | 0        | -0.83784 | 0.189015 | -4.43269 | 2.41E-05 | 0.000717 | 0.633436 |
| ENSG0000 | mucosal h | Inflamed | ZNRF3      | protein_cc  | chr22 | 29279580 | 29453475 | + | 6968 | 568.9737 | 0        | 0.773542 | 0.174571 | 4.431094 | 2.42E-05 | 0.00072  | 0.637353 |
| ENSG0000 | mucosal h | Inflamed | PRDM1      | protein_cc  | chr6  | 1.07E+08 | 1.07E+08 | + | 6369 | 2726.749 | 0        | -0.87848 | 0.198259 | -4.43098 | 2.43E-05 | 0.00072  | 0.637642 |
| ENSG0000 | mucosal h | Inflamed | ZADH2      | protein_cc  | chr18 | 72907063 | 72921303 | - | 8157 | 1859.379 | 0        | 0.59454  | 0.134193 | 4.430485 | 2.43E-05 | 0.000721 | 0.638854 |
| ENSG0000 | mucosal h | Inflamed | KIAA0125   | protein_cc  | chr14 | 1.06E+08 | 1.06E+08 | + | 3208 | 750.8568 | 0        | -1.39433 | 0.314861 | -4.42838 | 2.45E-05 | 0.000726 | 0.644064 |
| ENSG0000 | mucosal h | Inflamed | SEMA3E     | protein_cc  | chr7  | 82993222 | 83278326 | - | 6748 | 19.59189 | 0.095465 | 1.286209 | 0.290461 | 4.428157 | 2.45E-05 | 0.000726 | 0.644631 |
| ENSG0000 | mucosal h | Inflamed | RGMB       | protein_cc  | chr5  | 98104354 | 98134347 | + | 6671 | 2478.702 | 0        | 0.967217 | 0.21848  | 4.42702  | 2.46E-05 | 0.000728 | 0.647472 |
| ENSG0000 | mucosal h | Inflamed | ITPKA      | protein_cc  | chr15 | 41785591 | 41795747 | + | 2090 | 867.6062 | 0        | 0.934722 | 0.211173 | 4.426334 | 2.47E-05 | 0.000729 | 0.649189 |
| ENSG0000 | mucosal h | Inflamed | RP3-406A7  | lincRNA     | chr6  | 1.37E+08 | 1.37E+08 | - | 374  | 35.61575 | 0        | 1.036014 | 0.23406  | 4.426284 | 2.47E-05 | 0.000729 | 0.649316 |
| ENSG0000 | mucosal h | Inflamed | IGHV3-53   | IG_V_gene   | chr14 | 1.07E+08 | 1.07E+08 | - | 569  | 2820.613 | 0        | -1.65449 | 0.373814 | -4.42597 | 2.47E-05 | 0.000729 | 0.650114 |
| ENSG0000 | mucosal h | Inflamed | RP5-884M   | lincRNA     | chr7  | 1.06E+08 | 1.06E+08 | + | 3542 | 77.30072 | 0.155131 | -1.80464 | 0.407767 | -4.42565 | 2.48E-05 | 0.000729 | 0.650907 |
| ENSG0000 | mucosal h | Inflamed | RP4-614O4  | antisense   | chr20 | 33855688 | 33867846 | - | 529  | 12.97613 | 0.057279 | 0.809874 | 0.183017 | 4.425126 | 2.48E-05 | 0.00073  | 0.65223  |
| ENSG0000 | mucosal h | Inflamed | RP5-1061F  | lincRNA     | chr1  | 2.29E+08 | 2.29E+08 | - | 1155 | 14.47494 | 0.042959 | 0.828629 | 0.187277 | 4.424616 | 2.49E-05 | 0.00073  | 0.653515 |
| ENSG0000 | mucosal h | Inflamed | FAAH       | protein_cc  | chr1  | 46859937 | 46879520 | + | 2776 | 1533.542 | 0        | 0.812135 | 0.183556 | 4.424444 | 2.49E-05 | 0.00073  | 0.653949 |
| ENSG0000 | mucosal h | Inflamed | LRRC3B     | protein_cc  | chr3  | 26664297 | 26752267 | + | 3271 | 4.119332 | 0.508353 | 0.93461  | 0.211308 | 4.422978 | 2.50E-05 | 0.000733 | 0.657664 |
| ENSG0000 | mucosal h | Inflamed | TNFAIP8L2  | protein_cc  | chr1  | 1.51E+08 | 1.51E+08 | + | 1178 | 208.6778 | 0        | -0.76535 | 0.173111 | -4.42114 | 2.52E-05 | 0.000738 | 0.662362 |
| ENSG0000 | mucosal h | Inflamed | PCBP3      | protein_cc  | chr21 | 47063608 | 47362368 | + | 6796 | 223.2792 | 0        | -1.13215 | 0.256191 | -4.41915 | 2.54E-05 | 0.000742 | 0.667456 |
| ENSG0000 | mucosal h | Inflamed | RP11-156E  | protein_cc  | chr1  | 2.45E+08 | 2.45E+08 | - | 1739 | 27.84248 | 0.011933 | 0.940284 | 0.212879 | 4.416994 | 2.56E-05 | 0.000747 | 0.67304  |

|          |           |          |                               |            |       |          |          |   |       |          |          |          |          |          |          |          |          |
|----------|-----------|----------|-------------------------------|------------|-------|----------|----------|---|-------|----------|----------|----------|----------|----------|----------|----------|----------|
| ENSG0000 | mucosal h | Inflamed | ACAN                          | protein_cc | chr15 | 89346674 | 89418585 | + | 10908 | 51.64678 | 0.078759 | -1.74135 | 0.394242 | -4.41697 | 2.56E-05 | 0.000747 | 0.673104 |
| ENSG0000 | mucosal h | Inflamed | IGHV4-39                      | IG_V_gene  | chr14 | 1.07E+08 | 1.07E+08 | - | 425   | 16459.82 | 0        | -1.65106 | 0.373893 | -4.41586 | 2.57E-05 | 0.000748 | 0.675981 |
| ENSG0000 | mucosal h | Inflamed | CSF2                          | protein_cc | chr5  | 1.31E+08 | 1.31E+08 | + | 783   | 48.97136 | 0.143198 | -1.93616 | 0.438462 | -4.41581 | 2.57E-05 | 0.000748 | 0.676128 |
| ENSG0000 | mucosal h | Inflamed | PITPNC1                       | protein_cc | chr17 | 65373575 | 65693372 | + | 7642  | 1173.117 | 0        | -0.61217 | 0.138634 | -4.41573 | 2.57E-05 | 0.000748 | 0.676345 |
| ENSG0000 | mucosal h | Inflamed | SHISA5                        | protein_cc | chr3  | 48509197 | 48542259 | - | 4586  | 6936.496 | 0        | -0.42216 | 0.095651 | -4.41355 | 2.59E-05 | 0.000754 | 0.682044 |
| ENSG0000 | mucosal h | Inflamed | CCR1                          | protein_cc | chr3  | 46243200 | 46249887 | - | 2731  | 700.3747 | 0        | -1.07431 | 0.24353  | -4.4114  | 2.62E-05 | 0.000759 | 0.687724 |
| ENSG0000 | mucosal h | Inflamed | SAMD13                        | protein_cc | chr1  | 84764049 | 84855640 | + | 3589  | 173.5752 | 0.002387 | 1.062635 | 0.240894 | 4.411213 | 2.62E-05 | 0.000759 | 0.688224 |
| ENSG0000 | mucosal h | Inflamed | IL21                          | protein_cc | chr4  | 1.24E+08 | 1.24E+08 | - | 629   | 4.300716 | 0.4821   | -1.04111 | 0.236038 | -4.4108  | 2.62E-05 | 0.000759 | 0.68933  |
| ENSG0000 | mucosal h | Inflamed | BEAN1                         | protein_cc | chr16 | 66461200 | 66527432 | + | 7165  | 36.90692 | 0.105012 | -1.70447 | 0.38658  | -4.40909 | 2.64E-05 | 0.000763 | 0.693883 |
| ENSG0000 | mucosal h | Inflamed | PPP1R26- <del>antisense</del> | antisense  | chr9  | 1.38E+08 | 1.38E+08 | - | 3750  | 168.9069 | 0.00716  | 1.0206   | 0.231482 | 4.408977 | 2.64E-05 | 0.000763 | 0.694183 |
| ENSG0000 | mucosal h | Inflamed | IMPDH1                        | protein_cc | chr7  | 1.28E+08 | 1.28E+08 | - | 3662  | 2418.876 | 0        | -0.56818 | 0.128976 | -4.40531 | 2.68E-05 | 0.000771 | 0.704074 |
| ENSG0000 | mucosal h | Inflamed | SELL                          | protein_cc | chr1  | 1.7E+08  | 1.7E+08  | - | 2725  | 1306.914 | 0        | -1.82656 | 0.414633 | -4.40525 | 2.68E-05 | 0.000771 | 0.704235 |
| ENSG0000 | mucosal h | Inflamed | NDUFA4L2                      | protein_cc | chr12 | 57628686 | 57634498 | - | 2806  | 287.1527 | 0        | -1.22186 | 0.277367 | -4.40522 | 2.68E-05 | 0.000771 | 0.704311 |
| ENSG0000 | mucosal h | Inflamed | HSH2D                         | protein_cc | chr19 | 16244838 | 16269386 | + | 3399  | 2116.874 | 0        | -0.58695 | 0.133262 | -4.40452 | 2.69E-05 | 0.000773 | 0.70622  |
| ENSG0000 | mucosal h | Inflamed | STX11                         | protein_cc | chr6  | 1.44E+08 | 1.45E+08 | + | 1926  | 326.599  | 0.002387 | -1.11112 | 0.252352 | -4.40307 | 2.70E-05 | 0.000776 | 0.710174 |
| ENSG0000 | mucosal h | Inflamed | HTRA3                         | protein_cc | chr4  | 8271492  | 8308838  | + | 3321  | 1223.031 | 0        | -1.30202 | 0.295809 | -4.40157 | 2.72E-05 | 0.000779 | 0.714301 |
| ENSG0000 | mucosal h | Inflamed | AC016747                      | processed  | chr2  | 61368732 | 61372104 | - | 3104  | 69.26253 | 0.002387 | -0.94855 | 0.215506 | -4.40149 | 2.72E-05 | 0.000779 | 0.714506 |
| ENSG0000 | mucosal h | Inflamed | RP11-503C                     | sense_intr | chr6  | 1.69E+08 | 1.69E+08 | - | 2559  | 10.9642  | 0.238663 | 1.053453 | 0.239358 | 4.401161 | 2.72E-05 | 0.000779 | 0.715415 |
| ENSG0000 | mucosal h | Inflamed | ENG                           | protein_cc | chr9  | 1.31E+08 | 1.31E+08 | - | 3710  | 6547.759 | 0        | -1.01798 | 0.231339 | -4.40037 | 2.73E-05 | 0.000781 | 0.717584 |
| ENSG0000 | mucosal h | Inflamed | IGLV8-61                      | IG_V_gene  | chr22 | 22453110 | 22453622 | + | 414   | 2969.332 | 0        | -1.65831 | 0.376905 | -4.3998  | 2.74E-05 | 0.000782 | 0.719187 |
| ENSG0000 | mucosal h | Inflamed | GLP2R                         | protein_cc | chr17 | 9725523  | 9795419  | + | 6052  | 351.895  | 0        | 1.194378 | 0.271488 | 4.399384 | 2.74E-05 | 0.000782 | 0.720328 |
| ENSG0000 | mucosal h | Inflamed | B3GNT8                        | protein_cc | chr19 | 41931264 | 41934635 | - | 1874  | 1291.685 | 0        | 0.820522 | 0.186542 | 4.398581 | 2.75E-05 | 0.000784 | 0.722559 |
| ENSG0000 | mucosal h | Inflamed | PDIA4                         | protein_cc | chr7  | 1.49E+08 | 1.49E+08 | - | 3277  | 15493.18 | 0        | -0.49912 | 0.11349  | -4.39795 | 2.76E-05 | 0.000785 | 0.724325 |
| ENSG0000 | mucosal h | Inflamed | CTD-2611C                     | pseudoger  | chr19 | 56218707 | 56219330 | + | 624   | 27.48687 | 0.059666 | 1.184869 | 0.269458 | 4.397232 | 2.76E-05 | 0.000785 | 0.726323 |
| ENSG0000 | mucosal h | Inflamed | MT-ND2                        | protein_cc | chrM  | 4470     | 5511     | + | 1042  | 402854.8 | 0        | 0.606382 | 0.137902 | 4.397189 | 2.76E-05 | 0.000785 | 0.726443 |
| ENSG0000 | mucosal h | Inflamed | SIRT5                         | protein_cc | chr6  | 13574816 | 13614790 | + | 5368  | 582.6468 | 0        | 0.506828 | 0.115275 | 4.396672 | 2.77E-05 | 0.000786 | 0.727889 |
| ENSG0000 | mucosal h | Inflamed | CD300LF                       | protein_cc | chr17 | 72690452 | 72709117 | - | 2159  | 320.673  | 0        | -0.75056 | 0.170789 | -4.39464 | 2.79E-05 | 0.000791 | 0.733616 |
| ENSG0000 | mucosal h | Inflamed | ELL2                          | protein_cc | chr5  | 95220802 | 95297775 | - | 7246  | 2321.671 | 0        | -0.97891 | 0.222763 | -4.39441 | 2.79E-05 | 0.000791 | 0.734267 |
| ENSG0000 | mucosal h | Inflamed | IGKV7-3                       | IG_V_pseu  | chr2  | 89214597 | 89214894 | - | 298   | 13.14081 | 0.200477 | -1.29358 | 0.294722 | -4.38916 | 2.85E-05 | 0.000807 | 0.749246 |
| ENSG0000 | mucosal h | Inflamed | RP11-209E                     | lincRNA    | chr15 | 53408562 | 53421895 | + | 601   | 15.31981 | 0.360382 | 1.339897 | 0.305332 | 4.388332 | 2.86E-05 | 0.000808 | 0.751626 |
| ENSG0000 | mucosal h | Inflamed | RINL                          | protein_cc | chr19 | 39358470 | 39368919 | - | 4205  | 412.3365 | 0        | -0.7197  | 0.164102 | -4.3857  | 2.89E-05 | 0.000816 | 0.75927  |
| ENSG0000 | mucosal h | Inflamed | RP11-112L                     | lincRNA    | chr20 | 48780001 | 48782639 | - | 733   | 3.684964 | 0.336516 | -0.79678 | 0.181687 | -4.38543 | 2.89E-05 | 0.000816 | 0.760051 |
| ENSG0000 | mucosal h | Inflamed | SLC15A3                       | protein_cc | chr11 | 60704556 | 60720002 | - | 6118  | 1743.453 | 0        | -0.75521 | 0.172238 | -4.38472 | 2.90E-05 | 0.000817 | 0.762131 |
| ENSG0000 | mucosal h | Inflamed | LINC0023E                     | processed  | chr14 | 66953072 | 66965271 | + | 1417  | 7.739857 | 0.260143 | 0.998045 | 0.227651 | 4.384095 | 2.91E-05 | 0.000818 | 0.763971 |
| ENSG0000 | mucosal h | Inflamed | RP11-123J                     | pseudoger  | chr4  | 77807182 | 77807523 | - | 342   | 3.71599  | 0.372315 | 0.760117 | 0.173391 | 4.383826 | 2.91E-05 | 0.000818 | 0.764761 |
| ENSG0000 | mucosal h | Inflamed | FJX1                          | protein_cc | chr11 | 35639735 | 35642419 | + | 2685  | 159.9045 | 0.00716  | -1.37695 | 0.314162 | -4.38292 | 2.92E-05 | 0.00082  | 0.767432 |
| ENSG0000 | mucosal h | Inflamed | MLC1                          | protein_cc | chr22 | 50497820 | 50524331 | - | 4297  | 54.46062 | 0.023866 | -1.41978 | 0.323994 | -4.3821  | 2.93E-05 | 0.000822 | 0.769839 |
| ENSG0000 | mucosal h | Inflamed | IL4I1                         | protein_cc | chr19 | 50392911 | 50432796 | - | 2563  | 548.8473 | 0        | -1.23275 | 0.281402 | -4.38075 | 2.94E-05 | 0.000824 | 0.773849 |
| ENSG0000 | mucosal h | Inflamed | SLC9B2                        | protein_cc | chr4  | 1.04E+08 | 1.04E+08 | - | 5469  | 207.6253 | 0        | -0.99493 | 0.227117 | -4.38071 | 2.94E-05 | 0.000824 | 0.77397  |
| ENSG0000 | mucosal h | Inflamed | PIGZ                          | protein_cc | chr3  | 1.97E+08 | 1.97E+08 | - | 3211  | 2712.305 | 0        | 1.148808 | 0.262267 | 4.380303 | 2.95E-05 | 0.000825 | 0.775182 |

|          |           |          |                     |            |        |          |          |     |          |          |          |          |          |          |          |          |          |
|----------|-----------|----------|---------------------|------------|--------|----------|----------|-----|----------|----------|----------|----------|----------|----------|----------|----------|----------|
| ENSG0000 | mucosal h | Inflamed | RP11-126C antisense | chr17      | 202429 | 207372   | +        | 748 | 41.83771 | 0.016706 | 1.019939 | 0.232893 | 4.379429 | 2.96E-05 | 0.000826 | 0.77779  |          |
| ENSG0000 | mucosal h | Inflamed | IGHV2-5             | IG_V_gene  | chr14  | 1.06E+08 | 1.06E+08 | -   | 377      | 6412.215 | 0        | -1.52657 | 0.348587 | -4.37931 | 2.96E-05 | 0.000826 | 0.778145 |
| ENSG0000 | mucosal h | Inflamed | CETP                | protein_cc | chr16  | 56995762 | 57017757 | +   | 2085     | 75.50835 | 0.00716  | -1.20368 | 0.274871 | -4.37908 | 2.96E-05 | 0.000826 | 0.778844 |
| ENSG0000 | mucosal h | Inflamed | RP11-316F           | lincRNA    | chr9   | 92316566 | 92334585 | +   | 822      | 6.687351 | 0.224344 | -0.94467 | 0.215785 | -4.37782 | 2.98E-05 | 0.000829 | 0.782609 |
| ENSG0000 | mucosal h | Inflamed | APOH                | protein_cc | chr17  | 64208151 | 64252643 | -   | 1332     | 3.856802 | 0.451074 | 0.877075 | 0.200351 | 4.377684 | 2.98E-05 | 0.000829 | 0.783021 |
| ENSG0000 | mucosal h | Inflamed | RHOH                | protein_cc | chr1   | 2.29E+08 | 2.29E+08 | +   | 4372     | 1569.408 | 0        | 1.070392 | 0.24456  | 4.376813 | 2.99E-05 | 0.00083  | 0.785642 |
| ENSG0000 | mucosal h | Inflamed | ITGB2               | protein_cc | chr21  | 46305868 | 46351904 | -   | 6797     | 6183.776 | 0        | -0.95846 | 0.21902  | -4.37613 | 3.00E-05 | 0.000832 | 0.787709 |
| ENSG0000 | mucosal h | Inflamed | MYO1G               | protein_cc | chr7   | 45002261 | 45018697 | -   | 8653     | 1283.862 | 0        | -0.96683 | 0.221125 | -4.37232 | 3.04E-05 | 0.000843 | 0.799312 |
| ENSG0000 | mucosal h | Inflamed | FAP                 | protein_cc | chr2   | 1.63E+08 | 1.63E+08 | -   | 7003     | 181.5656 | 0.01432  | -1.82985 | 0.418621 | -4.37115 | 3.05E-05 | 0.000846 | 0.802917 |
| ENSG0000 | mucosal h | Inflamed | CMTM4               | protein_cc | chr16  | 66648653 | 66730610 | -   | 8117     | 8551.907 | 0        | 0.972792 | 0.222643 | 4.3693   | 3.08E-05 | 0.000851 | 0.808625 |
| ENSG0000 | mucosal h | Inflamed | WAS                 | protein_cc | chrX   | 48534985 | 48549818 | +   | 2381     | 1175.014 | 0        | -0.96469 | 0.220871 | -4.36765 | 3.10E-05 | 0.000856 | 0.813767 |
| ENSG0000 | mucosal h | Inflamed | RN7SL728l           | misc_RNA   | chr4   | 1.03E+08 | 1.03E+08 | -   | 298      | 1.119332 | 0.713604 | 0.483248 | 0.110683 | 4.366058 | 3.11E-05 | 0.00086  | 0.818741 |
| ENSG0000 | mucosal h | Inflamed | SEC14L1             | protein_cc | chr17  | 75082798 | 75213179 | +   | 10846    | 5528.599 | 0        | -0.68701 | 0.157449 | -4.36339 | 3.15E-05 | 0.000868 | 0.82717  |
| ENSG0000 | mucosal h | Inflamed | TPPA                | protein_cc | chr8   | 63961112 | 63998612 | -   | 2389     | 96.29117 | 0.02148  | 1.365825 | 0.313067 | 4.36273  | 3.15E-05 | 0.000869 | 0.829254 |
| ENSG0000 | mucosal h | Inflamed | CLDN8               | protein_cc | chr21  | 31586324 | 31588391 | -   | 2068     | 198.4177 | 0.408115 | 2.528238 | 0.57959  | 4.362112 | 3.16E-05 | 0.00087  | 0.83122  |
| ENSG0000 | mucosal h | Inflamed | ANGPT2              | protein_cc | chr8   | 6357172  | 6420930  | -   | 6784     | 134.327  | 0.00716  | -1.30941 | 0.300344 | -4.3597  | 3.19E-05 | 0.000878 | 0.838938 |
| ENSG0000 | mucosal h | Inflamed | APOE                | protein_cc | chr19  | 45409011 | 45412650 | +   | 2191     | 6253.969 | 0        | -0.81586 | 0.187178 | -4.35872 | 3.20E-05 | 0.00088  | 0.842097 |
| ENSG0000 | mucosal h | Inflamed | RP5-1071l           | antisense  | chr1   | 21619783 | 21626267 | +   | 2479     | 28.8043  | 0.016706 | -0.9984  | 0.229075 | -4.35841 | 3.21E-05 | 0.00088  | 0.843092 |
| ENSG0000 | mucosal h | Inflamed | BAIAP3              | protein_cc | chr16  | 1383602  | 1399439  | +   | 6143     | 314.6158 | 0        | 0.881209 | 0.20221  | 4.357884 | 3.21E-05 | 0.000881 | 0.844791 |
| ENSG0000 | mucosal h | Inflamed | CPNE2               | protein_cc | chr16  | 57126449 | 57181878 | +   | 7380     | 2577.453 | 0        | 0.495854 | 0.113803 | 4.357118 | 3.22E-05 | 0.000883 | 0.847274 |
| ENSG0000 | mucosal h | Inflamed | IGFBP7              | protein_cc | chr4   | 57896939 | 57976551 | -   | 1932     | 8715.718 | 0        | -0.99373 | 0.228154 | -4.35555 | 3.24E-05 | 0.000887 | 0.852391 |
| ENSG0000 | mucosal h | Inflamed | ILDRL               | protein_cc | chr3   | 1.22E+08 | 1.22E+08 | -   | 2953     | 758.9021 | 0        | 0.924406 | 0.212244 | 4.355386 | 3.24E-05 | 0.000887 | 0.85291  |
| ENSG0000 | mucosal h | Inflamed | AGAP1               | protein_cc | chr2   | 2.36E+08 | 2.37E+08 | +   | 13896    | 3369.623 | 0        | 0.666168 | 0.152993 | 4.354242 | 3.26E-05 | 0.00089  | 0.856653 |
| ENSG0000 | mucosal h | Inflamed | ZNF33B              | processed  | chr10  | 43069633 | 43134016 | -   | 2810     | 91.29356 | 0        | 0.546852 | 0.125638 | 4.352589 | 3.28E-05 | 0.000894 | 0.862091 |
| ENSG0000 | mucosal h | Inflamed | C1orf226            | protein_cc | chr1   | 1.62E+08 | 1.62E+08 | +   | 4487     | 1371.635 | 0        | 0.821121 | 0.188656 | 4.352475 | 3.28E-05 | 0.000894 | 0.862467 |
| ENSG0000 | mucosal h | Inflamed | KCNJ8               | protein_cc | chr12  | 21917889 | 21928515 | -   | 2484     | 119.2578 | 0        | -1.21118 | 0.278362 | -4.35109 | 3.30E-05 | 0.000898 | 0.867064 |
| ENSG0000 | mucosal h | Inflamed | KLLN                | protein_cc | chr10  | 89618918 | 89623194 | -   | 4277     | 67.0716  | 0.011933 | 0.795568 | 0.182872 | 4.35041  | 3.31E-05 | 0.000899 | 0.86931  |
| ENSG0000 | mucosal h | Inflamed | ZACN                | protein_cc | chr17  | 74068042 | 74079747 | +   | 4307     | 8.420048 | 0.112172 | -0.92997 | 0.213828 | -4.34918 | 3.32E-05 | 0.000902 | 0.873425 |
| ENSG0000 | mucosal h | Inflamed | TNFRSF18            | protein_cc | chr1   | 1138888  | 1142071  | -   | 1370     | 294.1313 | 0        | -0.93719 | 0.215498 | -4.34893 | 3.33E-05 | 0.000902 | 0.874259 |
| ENSG0000 | mucosal h | Inflamed | CA12                | protein_cc | chr15  | 63613577 | 63674360 | -   | 7313     | 16402.57 | 0        | 0.983931 | 0.226335 | 4.347237 | 3.35E-05 | 0.000907 | 0.879923 |
| ENSG0000 | mucosal h | Inflamed | NCF1C               | pseudoger  | chr7   | 74572445 | 74587848 | -   | 1892     | 271.4606 | 0        | -1.033   | 0.237748 | -4.34494 | 3.38E-05 | 0.000914 | 0.887694 |
| ENSG0000 | mucosal h | Inflamed | MT-ND4L             | protein_cc | chrM   | 10470    | 10766    | +   | 297      | 141014.5 | 0        | 0.562426 | 0.129495 | 4.343219 | 3.40E-05 | 0.000919 | 0.893544 |
| ENSG0000 | mucosal h | Inflamed | H1FO                | protein_cc | chr22  | 38201114 | 38203442 | +   | 2329     | 8982.845 | 0        | 0.518586 | 0.119404 | 4.343117 | 3.40E-05 | 0.000919 | 0.893895 |
| ENSG0000 | mucosal h | Inflamed | CEACAM1l            | protein_cc | chr19  | 45202421 | 45213986 | +   | 1702     | 2.97136  | 0.460621 | 0.757932 | 0.174542 | 4.342398 | 3.41E-05 | 0.00092  | 0.896353 |
| ENSG0000 | mucosal h | Inflamed | GUCA2B              | protein_cc | chr1   | 42619092 | 42621495 | +   | 597      | 1477.284 | 0.004773 | 2.278252 | 0.524674 | 4.342224 | 3.41E-05 | 0.00092  | 0.896951 |
| ENSG0000 | mucosal h | Inflamed | CTD-2132l           | sense_intr | chr17  | 40190250 | 40190752 | -   | 503      | 10.84248 | 0.064439 | 0.787803 | 0.181466 | 4.341336 | 3.42E-05 | 0.000922 | 0.9      |
| ENSG0000 | mucosal h | Inflamed | PAEP                | protein_cc | chr9   | 1.38E+08 | 1.38E+08 | +   | 1454     | 6.801909 | 0.501193 | -1.17399 | 0.270438 | -4.34108 | 3.43E-05 | 0.000922 | 0.900894 |
| ENSG0000 | mucosal h | Inflamed | ECHDC2              | protein_cc | chr1   | 53361656 | 53392884 | -   | 11498    | 2735.37  | 0        | 0.759788 | 0.17503  | 4.340897 | 3.43E-05 | 0.000922 | 0.901509 |
| ENSG0000 | mucosal h | Inflamed | CHAD                | protein_cc | chr17  | 48541857 | 48546327 | -   | 1802     | 238.6468 | 0.00716  | 1.798918 | 0.414436 | 4.340637 | 3.43E-05 | 0.000922 | 0.902405 |
| ENSG0000 | mucosal h | Inflamed | AGAP11              | processed  | chr10  | 88752163 | 88769960 | +   | 4560     | 5.360382 | 0.257757 | 0.827813 | 0.190746 | 4.339884 | 3.44E-05 | 0.000923 | 0.905007 |

|          |                     |           |                  |          |          |   |      |          |          |          |          |          |          |          |          |
|----------|---------------------|-----------|------------------|----------|----------|---|------|----------|----------|----------|----------|----------|----------|----------|----------|
| ENSG0000 | mucosal hi Inflamed | PIWIL2    | protein_cc chr8  | 22132810 | 22215076 | + | 5751 | 68.91647 | 0.002387 | 0.943307 | 0.217393 | 4.33917  | 3.45E-05 | 0.000925 | 0.907478 |
| ENSG0000 | mucosal hi Inflamed | PRF1      | protein_cc chr10 | 72357104 | 72362531 | - | 2534 | 581.3986 | 0        | -0.8821  | 0.203297 | -4.33896 | 3.45E-05 | 0.000925 | 0.908208 |
| ENSG0000 | mucosal hi Inflamed | AC129492  | protein_cc chr17 | 7982800  | 7984883  | + | 1804 | 24.34368 | 0.042959 | 1.188859 | 0.274035 | 4.338341 | 3.46E-05 | 0.000925 | 0.910355 |
| ENSG0000 | mucosal hi Inflamed | LINC0093C | lincRNA chr15    | 93111048 | 93115272 | - | 1657 | 19.32458 | 0.097852 | 1.25374  | 0.288996 | 4.338259 | 3.46E-05 | 0.000925 | 0.910639 |
| ENSG0000 | mucosal hi Inflamed | RPL29P30  | pseudoger chr15  | 71088936 | 71095027 | - | 946  | 4.661098 | 0.48926  | 1.022737 | 0.235795 | 4.337394 | 3.48E-05 | 0.000927 | 0.913654 |
| ENSG0000 | mucosal hi Inflamed | RP11-483E | lincRNA chr3     | 1.5E+08  | 1.5E+08  | - | 335  | 0.866348 | 0.785203 | 0.401553 | 0.092592 | 4.336816 | 3.48E-05 | 0.000927 | 0.915672 |
| ENSG0000 | mucosal hi Inflamed | MB        | protein_cc chr22 | 36002811 | 36033998 | - | 3020 | 257.7112 | 0.00716  | 1.519678 | 0.350418 | 4.336753 | 3.48E-05 | 0.000927 | 0.915892 |
| ENSG0000 | mucosal hi Inflamed | ELOVL3    | protein_cc chr10 | 1.04E+08 | 1.04E+08 | + | 1371 | 7.99284  | 0.138425 | -1.00394 | 0.231499 | -4.33668 | 3.48E-05 | 0.000927 | 0.916132 |
| ENSG0000 | mucosal hi Inflamed | TRPV1     | protein_cc chr17 | 3468738  | 3500392  | - | 4995 | 18.09308 | 0.054893 | 0.907662 | 0.209308 | 4.33648  | 3.49E-05 | 0.000927 | 0.916848 |
| ENSG0000 | mucosal hi Inflamed | LINC00842 | lincRNA chr10    | 47011753 | 47174018 | - | 4893 | 19.80668 | 0.026253 | 0.991621 | 0.228717 | 4.335572 | 3.50E-05 | 0.000929 | 0.920032 |
| ENSG0000 | mucosal hi Inflamed | SERHL     | processed_chr22  | 42896585 | 42908566 | + | 1742 | 5.520286 | 0.183771 | 0.81119  | 0.187112 | 4.335313 | 3.50E-05 | 0.000929 | 0.920943 |
| ENSG0000 | mucosal hi Inflamed | RDH5      | protein_cc chr12 | 56114151 | 56118489 | + | 2983 | 223.3795 | 0        | 0.774    | 0.17854  | 4.33517  | 3.50E-05 | 0.000929 | 0.921447 |
| ENSG0000 | mucosal hi Inflamed | TMEM89    | protein_cc chr3  | 48658192 | 48659288 | - | 662  | 7.28401  | 0.145585 | 0.927449 | 0.21399  | 4.334085 | 3.52E-05 | 0.000932 | 0.92527  |
| ENSG0000 | mucosal hi Inflamed | CTD-2342f | lincRNA chr8     | 1.36E+08 | 1.36E+08 | + | 1003 | 5.945107 | 0.245823 | -1.01104 | 0.233375 | -4.33226 | 3.54E-05 | 0.000937 | 0.931736 |
| ENSG0000 | mucosal hi Inflamed | IL13RA2   | protein_cc chrX  | 1.14E+08 | 1.14E+08 | - | 1626 | 164.5179 | 0.019093 | -2.09317 | 0.483164 | -4.33222 | 3.54E-05 | 0.000937 | 0.931896 |
| ENSG0000 | mucosal hi Inflamed | GMFG      | protein_cc chr19 | 39818993 | 39833012 | - | 1490 | 584.327  | 0        | -0.94789 | 0.218865 | -4.33095 | 3.56E-05 | 0.00094  | 0.936416 |
| ENSG0000 | mucosal hi Inflamed | ANGPTL4   | protein_cc chr19 | 8428173  | 8439257  | + | 2482 | 668.0549 | 0        | -1.21589 | 0.280791 | -4.33023 | 3.57E-05 | 0.000942 | 0.938986 |
| ENSG0000 | mucosal hi Inflamed | PRR26     | protein_cc chr10 | 695888   | 711109   | + | 4833 | 288.8305 | 0        | 0.873992 | 0.201874 | 4.329396 | 3.58E-05 | 0.000944 | 0.941977 |
| ENSG0000 | mucosal hi Inflamed | FAM225A   | lincRNA chr9     | 1.16E+08 | 1.16E+08 | + | 6100 | 30.56086 | 0.004773 | -0.93203 | 0.215326 | -4.32848 | 3.60E-05 | 0.000946 | 0.945256 |
| ENSG0000 | mucosal hi Inflamed | MCF2L-AS1 | antisense chr13  | 1.14E+08 | 1.14E+08 | - | 712  | 58.92363 | 0.002387 | 0.822388 | 0.190015 | 4.328008 | 3.60E-05 | 0.000947 | 0.946976 |
| ENSG0000 | mucosal hi Inflamed | RUNDC3B   | protein_cc chr7  | 87256864 | 87461611 | + | 4710 | 84.8568  | 0.019093 | 1.048736 | 0.242363 | 4.327136 | 3.61E-05 | 0.000949 | 0.950132 |
| ENSG0000 | mucosal hi Inflamed | CTD-2555c | lincRNA chr14    | 1.03E+08 | 1.03E+08 | + | 1603 | 86.30072 | 0.004773 | -1.27405 | 0.294556 | -4.32533 | 3.64E-05 | 0.000955 | 0.956691 |
| ENSG0000 | mucosal hi Inflamed | PTPRO     | protein_cc chr12 | 15475331 | 15750333 | + | 7519 | 381.9427 | 0        | 1.237761 | 0.286233 | 4.32431  | 3.65E-05 | 0.000956 | 0.960426 |
| ENSG0000 | mucosal hi Inflamed | ITPRIPL1  | protein_cc chr2  | 96991069 | 96994091 | + | 2495 | 102.3938 | 0        | -0.81384 | 0.188209 | -4.32414 | 3.66E-05 | 0.000956 | 0.961041 |
| ENSG0000 | mucosal hi Inflamed | AKAP7     | protein_cc chr6  | 1.31E+08 | 1.32E+08 | + | 4394 | 375.6516 | 0        | 0.887233 | 0.205182 | 4.324127 | 3.66E-05 | 0.000956 | 0.961093 |
| ENSG0000 | mucosal hi Inflamed | SBNO2     | protein_cc chr19 | 1107636  | 1174282  | - | 6476 | 7246.43  | 0        | -0.78542 | 0.181661 | -4.32357 | 3.66E-05 | 0.000957 | 0.963133 |
| ENSG0000 | mucosal hi Inflamed | GNGT2     | protein_cc chr17 | 47280153 | 47287936 | - | 1689 | 97.24821 | 0        | -0.61356 | 0.141937 | -4.32278 | 3.67E-05 | 0.000959 | 0.966041 |
| ENSG0000 | mucosal hi Inflamed | TRPM4     | protein_cc chr19 | 49660998 | 49715093 | + | 6604 | 8946.905 | 0        | 0.728454 | 0.16853  | 4.322392 | 3.68E-05 | 0.00096  | 0.967471 |
| ENSG0000 | mucosal hi Inflamed | IGKV2D-24 | IG_V_gene chr2   | 90043607 | 90044439 | + | 390  | 158.9117 | 0.004773 | -1.39099 | 0.321889 | -4.32135 | 3.69E-05 | 0.000963 | 0.971334 |
| ENSG0000 | mucosal hi Inflamed | RP11-44M  | pseudoger chr7   | 1E+08    | 1E+08    | + | 1006 | 2.448687 | 0.463007 | 0.628599 | 0.145493 | 4.32047  | 3.71E-05 | 0.000965 | 0.974585 |
| ENSG0000 | mucosal hi Inflamed | RP11-493L | lincRNA chr12    | 47641907 | 47651322 | + | 510  | 7.116945 | 0.162291 | -0.93865 | 0.217274 | -4.3201  | 3.71E-05 | 0.000965 | 0.975966 |
| ENSG0000 | mucosal hi Inflamed | USP30-AS1 | antisense chr12  | 1.09E+08 | 1.09E+08 | - | 656  | 108.3222 | 0        | -0.70289 | 0.162708 | -4.31996 | 3.71E-05 | 0.000965 | 0.97648  |
| ENSG0000 | mucosal hi Inflamed | P2RY4     | protein_cc chrX  | 69478016 | 69479654 | - | 1639 | 18.80668 | 0.116945 | 1.246513 | 0.288706 | 4.317592 | 3.75E-05 | 0.000972 | 0.985327 |
| ENSG0000 | mucosal hi Inflamed | HOXA6     | protein_cc chr7  | 27185015 | 27190222 | - | 1285 | 230.8687 | 0.016706 | 1.155907 | 0.267725 | 4.317511 | 3.75E-05 | 0.000972 | 0.98563  |
| ENSG0000 | mucosal hi Inflamed | PLCG2     | protein_cc chr16 | 81772702 | 81991899 | + | 9017 | 2322.298 | 0        | -0.9694  | 0.224601 | -4.31608 | 3.77E-05 | 0.000976 | 0.991009 |
| ENSG0000 | mucosal hi Inflamed | RP11-797f | lincRNA chr15    | 77334178 | 77335533 | - | 1356 | 40.75418 | 0.004773 | 0.845648 | 0.195941 | 4.315834 | 3.77E-05 | 0.000976 | 0.991947 |
| ENSG0000 | mucosal hi Inflamed | RP11-108f | lincRNA chr18    | 56481112 | 56501596 | + | 478  | 2.217184 | 0.553699 | -0.72561 | 0.168243 | -4.31286 | 3.82E-05 | 0.000985 | 1        |
| ENSG0000 | mucosal hi Inflamed | CD300C    | protein_cc chr17 | 72537247 | 72542282 | - | 1517 | 121.5776 | 0        | -0.99647 | 0.231053 | -4.31271 | 3.82E-05 | 0.000985 | 1        |
| ENSG0000 | mucosal hi Inflamed | AC112229  | lincRNA chr2     | 1.11E+08 | 1.11E+08 | - | 2774 | 121.1432 | 0.00716  | 0.826137 | 0.191561 | 4.312658 | 3.82E-05 | 0.000985 | 1        |
| ENSG0000 | mucosal hi Inflamed | RPL36AP4  | pseudoger chr15  | 90231168 | 90231474 | - | 307  | 10.66826 | 0.145585 | 1.091734 | 0.253231 | 4.311213 | 3.84E-05 | 0.00099  | 1        |

|          |           |          |           |              |       |          |          |   |       |          |          |          |          |          |          |          |   |
|----------|-----------|----------|-----------|--------------|-------|----------|----------|---|-------|----------|----------|----------|----------|----------|----------|----------|---|
| ENSG0000 | mucosal h | Inflamed | RP11-772E | pseudoger    | chr5  | 1.26E+08 | 1.26E+08 | - | 232   | 11.62768 | 0.155131 | 0.950762 | 0.220563 | 4.310608 | 3.85E-05 | 0.000991 | 1 |
| ENSG0000 | mucosal h | Inflamed | KRT16     | protein_cc   | chr17 | 39766030 | 39772151 | - | 2475  | 80.31026 | 0.365155 | -2.62193 | 0.60838  | -4.30969 | 3.86E-05 | 0.000994 | 1 |
| ENSG0000 | mucosal h | Inflamed | SP140     | protein_cc   | chr2  | 2.31E+08 | 2.31E+08 | + | 5829  | 447.0788 | 0        | -1.12037 | 0.260037 | -4.30851 | 3.88E-05 | 0.000997 | 1 |
| ENSG0000 | mucosal h | Inflamed | ANK1      | protein_cc   | chr8  | 41510739 | 41754280 | - | 10799 | 186.5561 | 0.009547 | -1.29069 | 0.299636 | -4.30755 | 3.89E-05 | 0.000999 | 1 |
| ENSG0000 | mucosal h | Inflamed | IGLV11-55 | IG_V_gene    | chr22 | 22556057 | 22556600 | + | 426   | 1.207637 | 0.718377 | -0.67094 | 0.155772 | -4.3072  | 3.90E-05 | 0.000999 | 1 |
| ENSG0000 | mucosal h | Inflamed | KCNJ10    | protein_cc   | chr1  | 1.6E+08  | 1.6E+08  | - | 5293  | 116.1981 | 0.016706 | -1.42617 | 0.331129 | -4.30699 | 3.90E-05 | 0.000999 | 1 |
| ENSG0000 | mucosal h | Inflamed | HSD11B1   | protein_cc   | chr1  | 2.1E+08  | 2.1E+08  | + | 1526  | 83.47255 | 0.011933 | -1.60404 | 0.372435 | -4.3069  | 3.90E-05 | 0.000999 | 1 |
| ENSG0000 | mucosal h | Inflamed | GPR141    | protein_cc   | chr7  | 37723399 | 37873390 | + | 2312  | 42.99523 | 0.009547 | -0.88142 | 0.204701 | -4.30587 | 3.92E-05 | 0.001002 | 1 |
| ENSG0000 | mucosal h | Inflamed | SLC4A11   | protein_cc   | chr20 | 3208063  | 3219836  | - | 4081  | 176.3604 | 0.004773 | -1.13288 | 0.263161 | -4.30488 | 3.93E-05 | 0.001005 | 1 |
| ENSG0000 | mucosal h | Inflamed | TAGAP     | protein_cc   | chr6  | 1.59E+08 | 1.59E+08 | - | 4089  | 1374.663 | 0        | -1.28311 | 0.298104 | -4.30423 | 3.94E-05 | 0.001007 | 1 |
| ENSG0000 | mucosal h | Inflamed | MAST2     | protein_cc   | chr1  | 46252659 | 46501796 | + | 7877  | 6413.153 | 0        | 0.586672 | 0.136341 | 4.302984 | 3.96E-05 | 0.00101  | 1 |
| ENSG0000 | mucosal h | Inflamed | PGF       | protein_cc   | chr14 | 75408537 | 75422487 | - | 5962  | 328.2267 | 0        | -1.15139 | 0.267741 | -4.30038 | 4.00E-05 | 0.001019 | 1 |
| ENSG0000 | mucosal h | Inflamed | ZDHHC11   | protein_cc   | chr5  | 710471   | 851101   | - | 7267  | 74.59189 | 0.02148  | 1.197079 | 0.278464 | 4.298865 | 4.02E-05 | 0.001024 | 1 |
| ENSG0000 | mucosal h | Inflamed | RP11-845C | sense_intr   | chr18 | 56038798 | 56039898 | + | 1101  | 2.816229 | 0.439141 | 0.777837 | 0.180954 | 4.298541 | 4.03E-05 | 0.001025 | 1 |
| ENSG0000 | mucosal h | Inflamed | FAM189A1  | protein_cc   | chr15 | 29412457 | 29862927 | - | 5545  | 353.1599 | 0.004773 | 1.969475 | 0.458258 | 4.297738 | 4.04E-05 | 0.001027 | 1 |
| ENSG0000 | mucosal h | Inflamed | AC034220  | processed_ch | chr5  | 1.32E+08 | 1.32E+08 | - | 2856  | 134.8282 | 0        | 1.119091 | 0.260452 | 4.29673  | 4.06E-05 | 0.001029 | 1 |
| ENSG0000 | mucosal h | Inflamed | LST1      | protein_cc   | chr6  | 31553901 | 31556686 | + | 2281  | 549.3031 | 0        | -1.0083  | 0.234674 | -4.29659 | 4.06E-05 | 0.001029 | 1 |
| ENSG0000 | mucosal h | Inflamed | HSD17B11  | protein_cc   | chr4  | 88257762 | 88312538 | - | 2435  | 3544.835 | 0        | 0.686528 | 0.159805 | 4.296041 | 4.07E-05 | 0.00103  | 1 |
| ENSG0000 | mucosal h | Inflamed | IGLV2-5   | IG_V_pseu    | chr22 | 23198937 | 23199213 | + | 277   | 66.26253 | 0.009547 | -1.38253 | 0.321911 | -4.29477 | 4.09E-05 | 0.001033 | 1 |
| ENSG0000 | mucosal h | Inflamed | IGHV4-55  | IG_V_pseu    | chr14 | 1.07E+08 | 1.07E+08 | - | 368   | 85.10263 | 0.01432  | -1.38225 | 0.321846 | -4.29476 | 4.09E-05 | 0.001033 | 1 |
| ENSG0000 | mucosal h | Inflamed | CACNA2D2  | protein_cc   | chr3  | 50400233 | 50541675 | - | 6319  | 311.1384 | 0.002387 | 1.271117 | 0.295988 | 4.294494 | 4.09E-05 | 0.001033 | 1 |
| ENSG0000 | mucosal h | Inflamed | LA16c-380 | lincRNA      | chr16 | 3056121  | 3057386  | + | 1266  | 173.2721 | 0        | 0.801736 | 0.186695 | 4.294353 | 4.09E-05 | 0.001033 | 1 |
| ENSG0000 | mucosal h | Inflamed | SHMT2     | protein_cc   | chr12 | 57623110 | 57628718 | + | 4838  | 2811.819 | 0        | -0.44552 | 0.10375  | -4.29413 | 4.10E-05 | 0.001033 | 1 |
| ENSG0000 | mucosal h | Inflamed | RP11-388M | antisense    | chr16 | 31207452 | 31208284 | + | 833   | 7.408115 | 0.093079 | 0.829825 | 0.193293 | 4.293094 | 4.11E-05 | 0.001036 | 1 |
| ENSG0000 | mucosal h | Inflamed | SLAMF1    | protein_cc   | chr1  | 1.61E+08 | 1.61E+08 | - | 4219  | 446      | 0        | -1.07065 | 0.249439 | -4.29224 | 4.13E-05 | 0.001038 | 1 |
| ENSG0000 | mucosal h | Inflamed | KCNJ6     | protein_cc   | chr21 | 38979678 | 39288749 | - | 19671 | 8.458234 | 0.138425 | 1.112257 | 0.259309 | 4.289303 | 4.17E-05 | 0.001049 | 1 |
| ENSG0000 | mucosal h | Inflamed | DPF3      | protein_cc   | chr14 | 73086004 | 73360809 | - | 6868  | 294.7279 | 0        | 0.92587  | 0.216008 | 4.286272 | 4.22E-05 | 0.00106  | 1 |
| ENSG0000 | mucosal h | Inflamed | VSIG1     | protein_cc   | chrX  | 1.07E+08 | 1.07E+08 | + | 3769  | 223.7422 | 0.045346 | -2.14081 | 0.499502 | -4.2859  | 4.23E-05 | 0.001061 | 1 |
| ENSG0000 | mucosal h | Inflamed | RP11-1151 | antisense    | chr18 | 56202647 | 56205784 | + | 2553  | 11.7852  | 0.069212 | 0.852274 | 0.198983 | 4.283143 | 4.27E-05 | 0.001071 | 1 |
| ENSG0000 | mucosal h | Inflamed | HCAR2     | protein_cc   | chr12 | 1.23E+08 | 1.23E+08 | - | 2051  | 522.4296 | 0.011933 | -2.32226 | 0.542296 | -4.28227 | 4.29E-05 | 0.001073 | 1 |
| ENSG0000 | mucosal h | Inflamed | AC093415  | processed_ch | chr3  | 37786923 | 37903271 | - | 6017  | 67.19809 | 0        | 0.701084 | 0.163747 | 4.281497 | 4.30E-05 | 0.001075 | 1 |
| ENSG0000 | mucosal h | Inflamed | RP11-806I | lincRNA      | chr17 | 76356534 | 76369992 | + | 1188  | 18       | 0.138425 | -1.44734 | 0.338142 | -4.28027 | 4.32E-05 | 0.001079 | 1 |
| ENSG0000 | mucosal h | Inflamed | FOXP1-IT1 | sense_intr   | chr3  | 71619406 | 71623608 | - | 3539  | 3.040573 | 0.386635 | 0.739806 | 0.172872 | 4.27949  | 4.33E-05 | 0.001081 | 1 |
| ENSG0000 | mucosal h | Inflamed | C6orf123  | protein_cc   | chr6  | 1.68E+08 | 1.68E+08 | - | 2146  | 45.95943 | 0.01432  | 1.003292 | 0.234466 | 4.279057 | 4.34E-05 | 0.001082 | 1 |
| ENSG0000 | mucosal h | Inflamed | ADH1C     | polymorph    | chr4  | 1E+08    | 1E+08    | - | 1860  | 4661.227 | 0.002387 | 1.951012 | 0.455972 | 4.278796 | 4.34E-05 | 0.001082 | 1 |
| ENSG0000 | mucosal h | Inflamed | RP11-159I | antisense    | chr11 | 27493276 | 27503980 | + | 1576  | 8.181384 | 0.167064 | 0.996975 | 0.233013 | 4.278625 | 4.35E-05 | 0.001082 | 1 |
| ENSG0000 | mucosal h | Inflamed | CTD-2267I | protein_cc   | chr17 | 38516907 | 38520945 | + | 2094  | 347.6587 | 0        | 0.499954 | 0.116858 | 4.278292 | 4.35E-05 | 0.001082 | 1 |
| ENSG0000 | mucosal h | Inflamed | MT-CO3    | protein_cc   | chrM  | 9207     | 9990     | + | 784   | 883817.3 | 0        | 0.717263 | 0.167656 | 4.278173 | 4.35E-05 | 0.001082 | 1 |
| ENSG0000 | mucosal h | Inflamed | LINC0088C | lincRNA      | chr3  | 1.57E+08 | 1.57E+08 | - | 2018  | 11.64439 | 0.042959 | -0.78872 | 0.184382 | -4.27764 | 4.36E-05 | 0.001083 | 1 |
| ENSG0000 | mucosal h | Inflamed | HPX       | protein_cc   | chr11 | 6452279  | 6463847  | - | 3631  | 58.3031  | 0.00716  | 1.000851 | 0.234013 | 4.276898 | 4.37E-05 | 0.001085 | 1 |

|          |           |          |           |                  |          |          |   |       |          |          |          |          |          |          |          |   |
|----------|-----------|----------|-----------|------------------|----------|----------|---|-------|----------|----------|----------|----------|----------|----------|----------|---|
| ENSG0000 | mucosal h | Inflamed | SLC5A7    | protein_cc chr2  | 1.09E+08 | 1.09E+08 | + | 5168  | 6.200477 | 0.305489 | 1.085541 | 0.253841 | 4.276463 | 4.38E-05 | 0.001086 | 1 |
| ENSG0000 | mucosal h | Inflamed | OSCAR     | protein_cc chr19 | 54597933 | 54606000 | - | 2069  | 205.2005 | 0        | -1.10813 | 0.259164 | -4.27578 | 4.39E-05 | 0.001087 | 1 |
| ENSG0000 | mucosal h | Inflamed | SCPEP1    | protein_cc chr17 | 55055466 | 55084129 | + | 3853  | 1439.403 | 0        | -0.52887 | 0.123751 | -4.27363 | 4.43E-05 | 0.001095 | 1 |
| ENSG0000 | mucosal h | Inflamed | DHRS11    | protein_cc chr17 | 34948228 | 34957235 | + | 5462  | 4695.227 | 0        | 1.107785 | 0.259255 | 4.272962 | 4.44E-05 | 0.001097 | 1 |
| ENSG0000 | mucosal h | Inflamed | AKAP1     | protein_cc chr17 | 55162453 | 55198710 | + | 5399  | 6864.687 | 0        | 0.738601 | 0.172876 | 4.272436 | 4.45E-05 | 0.001098 | 1 |
| ENSG0000 | mucosal h | Inflamed | RP11-350J | antisense chr6   | 1.5E+08  | 1.5E+08  | + | 312   | 18.30549 | 0.174224 | -1.32328 | 0.309734 | -4.2723  | 4.45E-05 | 0.001098 | 1 |
| ENSG0000 | mucosal h | Inflamed | IGHV3-20  | IG_V_gene chr14  | 1.07E+08 | 1.07E+08 | - | 413   | 998.5036 | 0.002387 | -1.86044 | 0.43553  | -4.27168 | 4.46E-05 | 0.001098 | 1 |
| ENSG0000 | mucosal h | Inflamed | TEX14     | protein_cc chr17 | 56634039 | 56769416 | - | 5325  | 12.05489 | 0.112172 | -1.07042 | 0.250588 | -4.27164 | 4.46E-05 | 0.001098 | 1 |
| ENSG0000 | mucosal h | Inflamed | CTA-150C2 | lincRNA chr22    | 39317232 | 39320713 | + | 678   | 3.145585 | 0.556086 | 0.727999 | 0.170437 | 4.271381 | 4.47E-05 | 0.001098 | 1 |
| ENSG0000 | mucosal h | Inflamed | APBA1     | protein_cc chr9  | 72042446 | 72287222 | - | 6534  | 491.3699 | 0.002387 | 0.806822 | 0.188917 | 4.27078  | 4.48E-05 | 0.0011   | 1 |
| ENSG0000 | mucosal h | Inflamed | GGT7      | protein_cc chr20 | 33432523 | 33460663 | - | 2966  | 1024.647 | 0        | 0.61213  | 0.143347 | 4.270272 | 4.49E-05 | 0.001101 | 1 |
| ENSG0000 | mucosal h | Inflamed | RP11-284E | pseudoger chrX   | 63524927 | 63526613 | - | 1436  | 6.620525 | 0.107399 | 0.778538 | 0.182375 | 4.268877 | 4.51E-05 | 0.001106 | 1 |
| ENSG0000 | mucosal h | Inflamed | NFKBIE    | protein_cc chr6  | 44225903 | 44233500 | - | 2556  | 1054.086 | 0        | -0.58341 | 0.136692 | -4.26803 | 4.52E-05 | 0.001108 | 1 |
| ENSG0000 | mucosal h | Inflamed | CXCL9     | protein_cc chr4  | 76922428 | 76928641 | - | 2740  | 1442.196 | 0        | -1.74981 | 0.410262 | -4.2651  | 4.57E-05 | 0.00112  | 1 |
| ENSG0000 | mucosal h | Inflamed | DTX4      | protein_cc chr11 | 58938903 | 58976060 | + | 6072  | 5949.203 | 0        | 0.554949 | 0.13014  | 4.264242 | 4.59E-05 | 0.001122 | 1 |
| ENSG0000 | mucosal h | Inflamed | COL18A1   | protein_cc chr21 | 46825052 | 46933634 | + | 8525  | 9513.974 | 0        | -1.11927 | 0.262496 | -4.26396 | 4.59E-05 | 0.001122 | 1 |
| ENSG0000 | mucosal h | Inflamed | VWF       | protein_cc chr12 | 6058040  | 6233936  | - | 9925  | 9569.983 | 0        | -1.32233 | 0.310165 | -4.2633  | 4.61E-05 | 0.001124 | 1 |
| ENSG0000 | mucosal h | Inflamed | NKG7      | protein_cc chr19 | 51874860 | 51875969 | - | 935   | 417.8496 | 0        | -0.84208 | 0.197561 | -4.26237 | 4.62E-05 | 0.001127 | 1 |
| ENSG0000 | mucosal h | Inflamed | SCNN1B    | protein_cc chr16 | 23289552 | 23392620 | + | 3918  | 3194.384 | 0        | 1.540918 | 0.361589 | 4.261521 | 4.64E-05 | 0.00113  | 1 |
| ENSG0000 | mucosal h | Inflamed | TBXAS1    | protein_cc chr7  | 1.39E+08 | 1.4E+08  | + | 6271  | 1252.377 | 0        | -0.65568 | 0.153895 | -4.26058 | 4.65E-05 | 0.001133 | 1 |
| ENSG0000 | mucosal h | Inflamed | NFE4      | antisense chr7   | 1.03E+08 | 1.03E+08 | + | 1072  | 7.823389 | 0.374702 | -1.30383 | 0.306043 | -4.26027 | 4.66E-05 | 0.001133 | 1 |
| ENSG0000 | mucosal h | Inflamed | FCGR1B    | protein_cc chr1  | 1.21E+08 | 1.21E+08 | - | 1392  | 32.4105  | 0.057279 | -1.40759 | 0.330425 | -4.25995 | 4.66E-05 | 0.001133 | 1 |
| ENSG0000 | mucosal h | Inflamed | DSCAML1   | protein_cc chr11 | 1.17E+08 | 1.18E+08 | - | 7035  | 78.03819 | 0.01432  | 1.217435 | 0.285803 | 4.259694 | 4.67E-05 | 0.001133 | 1 |
| ENSG0000 | mucosal h | Inflamed | CFP       | protein_cc chrX  | 47483612 | 47489704 | - | 4576  | 473.4988 | 0        | -1.1095  | 0.260489 | -4.25932 | 4.68E-05 | 0.001134 | 1 |
| ENSG0000 | mucosal h | Inflamed | UGT1A7    | protein_cc chr2  | 2.35E+08 | 2.35E+08 | + | 4167  | 5.799523 | 0.324582 | 0.896861 | 0.210586 | 4.258876 | 4.68E-05 | 0.001134 | 1 |
| ENSG0000 | mucosal h | Inflamed | ASIC2     | protein_cc chr17 | 31340105 | 32501983 | - | 5597  | 21.7685  | 0.054893 | 1.09178  | 0.256363 | 4.258735 | 4.69E-05 | 0.001134 | 1 |
| ENSG0000 | mucosal h | Inflamed | STMND1    | protein_cc chr6  | 17102489 | 17131603 | + | 2882  | 14.358   | 0.224344 | 1.156742 | 0.271718 | 4.257141 | 4.71E-05 | 0.00114  | 1 |
| ENSG0000 | mucosal h | Inflamed | PLA2G3    | protein_cc chr22 | 31530795 | 31536593 | - | 2697  | 75.44153 | 0.126492 | -1.70638 | 0.400987 | -4.25545 | 4.74E-05 | 0.001146 | 1 |
| ENSG0000 | mucosal h | Inflamed | RP13-452J | processed_chr7   | 1.52E+08 | 1.52E+08 | + | 2222  | 8.9642   | 0.224344 | -1.14369 | 0.268779 | -4.25513 | 4.75E-05 | 0.001147 | 1 |
| ENSG0000 | mucosal h | Inflamed | TIFA      | protein_cc chr4  | 1.13E+08 | 1.13E+08 | - | 4250  | 450.1456 | 0        | -0.80156 | 0.188434 | -4.2538  | 4.77E-05 | 0.001151 | 1 |
| ENSG0000 | mucosal h | Inflamed | CORO1A    | protein_cc chr16 | 30194148 | 30200397 | + | 4871  | 5579.179 | 0        | -0.91487 | 0.215173 | -4.25178 | 4.81E-05 | 0.001159 | 1 |
| ENSG0000 | mucosal h | Inflamed | PTPRCAP   | protein_cc chr11 | 67202981 | 67205538 | - | 1292  | 1574.029 | 0        | -0.91541 | 0.215318 | -4.25146 | 4.82E-05 | 0.001159 | 1 |
| ENSG0000 | mucosal h | Inflamed | ZNF704    | protein_cc chr8  | 81540686 | 81787016 | - | 15008 | 939.1862 | 0        | 1.1656   | 0.274268 | 4.249856 | 4.85E-05 | 0.001165 | 1 |
| ENSG0000 | mucosal h | Inflamed | RP11-740J | pseudoger chr7   | 6940055  | 6940254  | - | 200   | 12.52506 | 0.439141 | 1.681393 | 0.395729 | 4.248846 | 4.86E-05 | 0.001169 | 1 |
| ENSG0000 | mucosal h | Inflamed | VSTM2A    | protein_cc chr7  | 54610018 | 54638773 | + | 5967  | 212.6754 | 0.038186 | 2.139245 | 0.503514 | 4.248628 | 4.87E-05 | 0.001169 | 1 |
| ENSG0000 | mucosal h | Inflamed | MT-ATP8   | protein_cc chrM  | 8366     | 8572     | + | 207   | 114755.2 | 0        | 0.568729 | 0.133887 | 4.247836 | 4.88E-05 | 0.00117  | 1 |
| ENSG0000 | mucosal h | Inflamed | RP11-348J | antisense chr10  | 1.13E+08 | 1.13E+08 | + | 1649  | 28.02387 | 0.073986 | 1.28509  | 0.302529 | 4.24782  | 4.88E-05 | 0.00117  | 1 |
| ENSG0000 | mucosal h | Inflamed | RP11-164F | antisense chr4   | 1.53E+08 | 1.53E+08 | + | 304   | 26.52029 | 0.02864  | 0.931315 | 0.219417 | 4.244501 | 4.94E-05 | 0.001184 | 1 |
| ENSG0000 | mucosal h | Inflamed | RP11-465E | lincRNA chr1     | 1072397  | 1079436  | + | 1620  | 41.49642 | 0.045346 | 1.132465 | 0.266913 | 4.242828 | 4.98E-05 | 0.001189 | 1 |
| ENSG0000 | mucosal h | Inflamed | RARRES3   | protein_cc chr11 | 63304281 | 63313934 | + | 1299  | 2199.408 | 0        | -0.79964 | 0.188469 | -4.24279 | 4.98E-05 | 0.001189 | 1 |

|          |           |          |           |            |       |          |          |   |       |          |          |          |          |          |          |          |   |
|----------|-----------|----------|-----------|------------|-------|----------|----------|---|-------|----------|----------|----------|----------|----------|----------|----------|---|
| ENSG0000 | mucosal h | Inflamed | SNHG18    | lincRNA    | chr5  | 9546312  | 9550721  | + | 1951  | 591.3532 | 0        | 0.553335 | 0.130443 | 4.241979 | 4.99E-05 | 0.001192 | 1 |
| ENSG0000 | mucosal h | Inflamed | CRYBA4    | protein_cc | chr22 | 27017928 | 27026636 | + | 811   | 5.940334 | 0.157518 | -0.92982 | 0.219216 | -4.24158 | 5.00E-05 | 0.001193 | 1 |
| ENSG0000 | mucosal h | Inflamed | GMPPA     | protein_cc | chr2  | 2.2E+08  | 2.2E+08  | + | 5331  | 2556.453 | 0        | -0.28049 | 0.066139 | -4.24097 | 5.01E-05 | 0.001194 | 1 |
| ENSG0000 | mucosal h | Inflamed | MT1E      | protein_cc | chr16 | 56659387 | 56661024 | + | 1052  | 2008.379 | 0        | 0.928725 | 0.219067 | 4.239462 | 5.04E-05 | 0.001199 | 1 |
| ENSG0000 | mucosal h | Inflamed | ZNF774    | protein_cc | chr15 | 90895477 | 90909324 | + | 5457  | 271.5513 | 0        | 0.907483 | 0.21406  | 4.239385 | 5.04E-05 | 0.001199 | 1 |
| ENSG0000 | mucosal h | Inflamed | CECR1     | protein_cc | chr22 | 17660194 | 17702879 | - | 5136  | 6169.15  | 0        | -0.92017 | 0.217088 | -4.23869 | 5.05E-05 | 0.001201 | 1 |
| ENSG0000 | mucosal h | Inflamed | KIAA0930  | protein_cc | chr22 | 45586219 | 45636650 | - | 10019 | 3982.141 | 0        | -0.43201 | 0.101951 | -4.23745 | 5.08E-05 | 0.001205 | 1 |
| ENSG0000 | mucosal h | Inflamed | TDO2      | protein_cc | chr4  | 1.57E+08 | 1.57E+08 | + | 5264  | 256.0811 | 0.002387 | -1.55213 | 0.366299 | -4.23733 | 5.08E-05 | 0.001205 | 1 |
| ENSG0000 | mucosal h | Inflamed | AC007292  | antisense  | chr19 | 4363786  | 4364637  | + | 746   | 35.2315  | 0.00716  | 0.66909  | 0.157989 | 4.23505  | 5.12E-05 | 0.001214 | 1 |
| ENSG0000 | mucosal h | Inflamed | NXPE4     | protein_cc | chr11 | 1.14E+08 | 1.14E+08 | - | 2163  | 2900.757 | 0        | 1.830036 | 0.432139 | 4.234829 | 5.13E-05 | 0.001214 | 1 |
| ENSG0000 | mucosal h | Inflamed | FAM110D   | protein_cc | chr1  | 26485511 | 26489119 | + | 1524  | 131.2005 | 0        | -0.92021 | 0.217331 | -4.23417 | 5.14E-05 | 0.001216 | 1 |
| ENSG0000 | mucosal h | Inflamed | SPECC1L   | protein_cc | chr22 | 24666786 | 24813708 | + | 7323  | 1443.835 | 0        | 0.517132 | 0.122184 | 4.232398 | 5.17E-05 | 0.001223 | 1 |
| ENSG0000 | mucosal h | Inflamed | MT-ATP6   | protein_cc | chrM  | 8527     | 9207     | + | 681   | 553274.8 | 0        | 0.535928 | 0.126664 | 4.231095 | 5.20E-05 | 0.001228 | 1 |
| ENSG0000 | mucosal h | Inflamed | RP11-380l | antisense  | chr8  | 28107580 | 28196772 | - | 887   | 3.451074 | 0.319809 | -0.83382 | 0.197128 | -4.22983 | 5.22E-05 | 0.001233 | 1 |
| ENSG0000 | mucosal h | Inflamed | IGHV2-26  | IG_V_gene  | chr14 | 1.07E+08 | 1.07E+08 | - | 381   | 2231.663 | 0        | -1.65862 | 0.392173 | -4.2293  | 5.24E-05 | 0.001234 | 1 |
| ENSG0000 | mucosal h | Inflamed | DNAH3     | protein_cc | chr16 | 20944433 | 21170762 | - | 14960 | 101.7088 | 0.004773 | 1.05139  | 0.248602 | 4.229209 | 5.24E-05 | 0.001234 | 1 |
| ENSG0000 | mucosal h | Inflamed | SLC2A6    | protein_cc | chr9  | 1.36E+08 | 1.36E+08 | - | 3540  | 464.7566 | 0        | -1.03155 | 0.244037 | -4.22701 | 5.28E-05 | 0.001243 | 1 |
| ENSG0000 | mucosal h | Inflamed | IGHV4-31  | IG_V_gene  | chr14 | 1.07E+08 | 1.07E+08 | - | 426   | 3977.647 | 0.002387 | -1.74577 | 0.413118 | -4.22585 | 5.30E-05 | 0.001247 | 1 |
| ENSG0000 | mucosal h | Inflamed | RP11-419l | lincRNA    | chr8  | 12333971 | 12334631 | + | 661   | 1.739857 | 0.536993 | 0.572582 | 0.13551  | 4.225379 | 5.31E-05 | 0.001248 | 1 |
| ENSG0000 | mucosal h | Inflamed | SH2D2A    | protein_cc | chr1  | 1.57E+08 | 1.57E+08 | - | 2512  | 315.716  | 0        | -0.69778 | 0.165153 | -4.22502 | 5.32E-05 | 0.001249 | 1 |
| ENSG0000 | mucosal h | Inflamed | RP11-299f | lincRNA    | chr2  | 1.02E+08 | 1.02E+08 | + | 2476  | 23.36516 | 0.019093 | 0.699184 | 0.165494 | 4.224824 | 5.32E-05 | 0.001249 | 1 |
| ENSG0000 | mucosal h | Inflamed | CHPT1     | protein_cc | chr12 | 1.02E+08 | 1.02E+08 | + | 6004  | 2110.487 | 0        | 0.511806 | 0.121154 | 4.224428 | 5.33E-05 | 0.001249 | 1 |
| ENSG0000 | mucosal h | Inflamed | LYPD1     | protein_cc | chr2  | 1.33E+08 | 1.33E+08 | - | 2412  | 58.7685  | 0.016706 | -1.39826 | 0.331031 | -4.22396 | 5.34E-05 | 0.00125  | 1 |
| ENSG0000 | mucosal h | Inflamed | MT-TL1    | Mt_tRNA    | chrM  | 3230     | 3304     | + | 75    | 1825.912 | 0        | 0.802033 | 0.189898 | 4.223502 | 5.35E-05 | 0.001251 | 1 |
| ENSG0000 | mucosal h | Inflamed | ZNF571-A5 | antisense  | chr19 | 38039816 | 38078249 | + | 4560  | 17.57041 | 0.038186 | 0.826593 | 0.195817 | 4.22125  | 5.40E-05 | 0.001261 | 1 |
| ENSG0000 | mucosal h | Inflamed | HSD17B3   | protein_cc | chr9  | 98997588 | 99064434 | - | 2056  | 26.26253 | 0.045346 | 1.017266 | 0.241026 | 4.22056  | 5.41E-05 | 0.001263 | 1 |
| ENSG0000 | mucosal h | Inflamed | LL22NC03- | protein_cc | chr22 | 47857048 | 47882860 | - | 1090  | 8.315036 | 0.200477 | 1.108937 | 0.26299  | 4.216655 | 5.49E-05 | 0.001281 | 1 |
| ENSG0000 | mucosal h | Inflamed | RP11-297f | lincRNA    | chr16 | 67464570 | 67465367 | - | 475   | 2.362768 | 0.47494  | 0.640845 | 0.151999 | 4.216107 | 5.50E-05 | 0.001282 | 1 |
| ENSG0000 | mucosal h | Inflamed | CEBPE     | protein_cc | chr14 | 23586513 | 23588825 | - | 1554  | 64.50835 | 0.01432  | -1.27216 | 0.301811 | -4.21508 | 5.52E-05 | 0.001286 | 1 |
| ENSG0000 | mucosal h | Inflamed | RP11-317J | antisense  | chr8  | 86354080 | 86377144 | - | 1257  | 43.29833 | 0.00716  | 0.864358 | 0.205113 | 4.214053 | 5.54E-05 | 0.00129  | 1 |
| ENSG0000 | mucosal h | Inflamed | MICB      | protein_cc | chr6  | 31462658 | 31478901 | + | 2854  | 334.9141 | 0        | -0.69898 | 0.165882 | -4.21373 | 5.55E-05 | 0.00129  | 1 |
| ENSG0000 | mucosal h | Inflamed | WNT11     | protein_cc | chr11 | 75897369 | 75921780 | - | 2401  | 70.54893 | 0.002387 | 1.191196 | 0.282759 | 4.212767 | 5.57E-05 | 0.001294 | 1 |
| ENSG0000 | mucosal h | Inflamed | CLEC4F    | protein_cc | chr2  | 71035775 | 71047732 | - | 2475  | 29.57279 | 0.042959 | 1.221818 | 0.29009  | 4.211861 | 5.59E-05 | 0.001297 | 1 |
| ENSG0000 | mucosal h | Inflamed | SPIRE2    | protein_cc | chr16 | 89884587 | 89937727 | + | 7975  | 2301.699 | 0        | 0.848531 | 0.201551 | 4.210013 | 5.63E-05 | 0.001305 | 1 |
| ENSG0000 | mucosal h | Inflamed | CAMK1G    | protein_cc | chr1  | 2.1E+08  | 2.1E+08  | + | 2676  | 19.42243 | 0.128878 | -1.22909 | 0.291989 | -4.20937 | 5.64E-05 | 0.001307 | 1 |
| ENSG0000 | mucosal h | Inflamed | RP11-1105 | antisense  | chr12 | 94665926 | 94670971 | - | 493   | 2.002387 | 0.520286 | 0.616804 | 0.146538 | 4.209164 | 5.65E-05 | 0.001307 | 1 |
| ENSG0000 | mucosal h | Inflamed | ADRB2     | protein_cc | chr5  | 1.48E+08 | 1.48E+08 | + | 2041  | 120.1575 | 0.002387 | -0.64411 | 0.153044 | -4.20864 | 5.66E-05 | 0.001308 | 1 |
| ENSG0000 | mucosal h | Inflamed | LINC00707 | lincRNA    | chr10 | 6821560  | 6884868  | + | 3070  | 5.582339 | 0.293556 | -1.08092 | 0.256877 | -4.20794 | 5.67E-05 | 0.00131  | 1 |
| ENSG0000 | mucosal h | Inflamed | CA7       | protein_cc | chr16 | 66878282 | 66888056 | + | 1862  | 2271.05  | 0.00716  | 2.339429 | 0.556039 | 4.207309 | 5.69E-05 | 0.001312 | 1 |
| ENSG0000 | mucosal h | Inflamed | CERCAM    | protein_cc | chr9  | 1.31E+08 | 1.31E+08 | + | 6054  | 1431.647 | 0        | -0.95687 | 0.227455 | -4.20688 | 5.70E-05 | 0.001313 | 1 |



|          |           |          |           |            |       |          |          |   |       |          |          |          |          |          |          |          |   |
|----------|-----------|----------|-----------|------------|-------|----------|----------|---|-------|----------|----------|----------|----------|----------|----------|----------|---|
| ENSG0000 | mucosal h | Inflamed | FIBIN     | protein_cc | chr11 | 27015628 | 27018630 | + | 3003  | 330.2697 | 0        | -1.33494 | 0.317358 | -4.20642 | 5.70E-05 | 0.001314 | 1 |
| ENSG0000 | mucosal h | Inflamed | LINC00922 | lincRNA    | chr16 | 65318402 | 65610203 | - | 2089  | 6.75179  | 0.391408 | -1.03536 | 0.246174 | -4.20582 | 5.72E-05 | 0.001314 | 1 |
| ENSG0000 | mucosal h | Inflamed | SLC6A12   | protein_cc | chr12 | 299243   | 323736   | - | 5683  | 123.6158 | 0.00716  | 0.909261 | 0.216204 | 4.205567 | 5.72E-05 | 0.001314 | 1 |
| ENSG0000 | mucosal h | Inflamed | B4GALNT2  | protein_cc | chr17 | 47209822 | 47247351 | + | 2110  | 1450.208 | 0.01432  | 1.911045 | 0.454442 | 4.205256 | 5.73E-05 | 0.001314 | 1 |
| ENSG0000 | mucosal h | Inflamed | AC092168  | sense_intr | chr2  | 1.01E+08 | 1.01E+08 | + | 717   | 2.847255 | 0.393795 | 0.739928 | 0.175965 | 4.204963 | 5.74E-05 | 0.001314 | 1 |
| ENSG0000 | mucosal h | Inflamed | NRAP      | protein_cc | chr10 | 1.15E+08 | 1.15E+08 | - | 5721  | 56.10501 | 0.062053 | 1.602359 | 0.381085 | 4.204726 | 5.74E-05 | 0.001314 | 1 |
| ENSG0000 | mucosal h | Inflamed | CHN2      | protein_cc | chr7  | 29161890 | 29553944 | + | 10853 | 449.2888 | 0        | 0.84939  | 0.202009 | 4.204718 | 5.74E-05 | 0.001314 | 1 |
| ENSG0000 | mucosal h | Inflamed | DLG1-AS1  | antisense  | chr3  | 1.97E+08 | 1.97E+08 | + | 1694  | 7.319809 | 0.116945 | 0.796666 | 0.189473 | 4.204651 | 5.74E-05 | 0.001314 | 1 |
| ENSG0000 | mucosal h | Inflamed | BTK       | protein_cc | chrX  | 1.01E+08 | 1.01E+08 | - | 4227  | 732.1408 | 0        | -0.94395 | 0.224502 | -4.20462 | 5.74E-05 | 0.001314 | 1 |
| ENSG0000 | mucosal h | Inflamed | LY6E      | protein_cc | chr8  | 1.44E+08 | 1.44E+08 | + | 2640  | 1887.2   | 0        | -0.90074 | 0.214238 | -4.20441 | 5.75E-05 | 0.001314 | 1 |
| ENSG0000 | mucosal h | Inflamed | PSAT1     | protein_cc | chr9  | 80912059 | 80945009 | + | 2188  | 466.8067 | 0.002387 | -0.89633 | 0.213217 | -4.20381 | 5.76E-05 | 0.001316 | 1 |
| ENSG0000 | mucosal h | Inflamed | GPSM3     | protein_cc | chr6  | 32158543 | 32163300 | - | 1854  | 2022.683 | 0        | -0.84072 | 0.200044 | -4.2027  | 5.79E-05 | 0.00132  | 1 |
| ENSG0000 | mucosal h | Inflamed | NDUF4F    | pseudoger  | chr3  | 37831412 | 37831936 | - | 525   | 5.298329 | 0.245823 | 0.784942 | 0.186787 | 4.202329 | 5.79E-05 | 0.00132  | 1 |
| ENSG0000 | mucosal h | Inflamed | FGFR2     | protein_cc | chr10 | 1.23E+08 | 1.23E+08 | - | 7543  | 1615.912 | 0        | 1.19537  | 0.284464 | 4.20219  | 5.80E-05 | 0.00132  | 1 |
| ENSG0000 | mucosal h | Inflamed | PEA15     | protein_cc | chr1  | 1.6E+08  | 1.6E+08  | + | 2806  | 4515.518 | 0        | -0.62692 | 0.149198 | -4.20191 | 5.80E-05 | 0.001321 | 1 |
| ENSG0000 | mucosal h | Inflamed | LINC0057C | lincRNA    | chr2  | 11534107 | 11543203 | + | 1650  | 14.87351 | 0.062053 | 1.000373 | 0.238135 | 4.200866 | 5.82E-05 | 0.001324 | 1 |
| ENSG0000 | mucosal h | Inflamed | GJD3      | protein_cc | chr17 | 38517235 | 38520067 | - | 1044  | 71.4463  | 0.00716  | -0.92535 | 0.22028  | -4.20079 | 5.83E-05 | 0.001324 | 1 |
| ENSG0000 | mucosal h | Inflamed | NCF1B     | pseudoger  | chr7  | 72634611 | 72649979 | + | 1950  | 283.7041 | 0        | -0.94745 | 0.225571 | -4.20025 | 5.84E-05 | 0.001325 | 1 |
| ENSG0000 | mucosal h | Inflamed | RP11-295F | antisense  | chr10 | 13724521 | 13726874 | + | 1978  | 0.878282 | 0.782816 | 0.469394 | 0.111756 | 4.200154 | 5.84E-05 | 0.001325 | 1 |
| ENSG0000 | mucosal h | Inflamed | SRPR      | protein_cc | chr11 | 1.26E+08 | 1.26E+08 | - | 4167  | 8540.143 | 0        | -0.44123 | 0.105069 | -4.19942 | 5.86E-05 | 0.001327 | 1 |
| ENSG0000 | mucosal h | Inflamed | FRZB      | protein_cc | chr2  | 1.84E+08 | 1.84E+08 | - | 3162  | 929.8735 | 0        | 0.855407 | 0.203767 | 4.197958 | 5.89E-05 | 0.001333 | 1 |
| ENSG0000 | mucosal h | Inflamed | ZNF219    | protein_cc | chr14 | 21558205 | 21572881 | - | 4643  | 2537.408 | 0        | 0.527248 | 0.125657 | 4.195922 | 5.93E-05 | 0.001342 | 1 |
| ENSG0000 | mucosal h | Inflamed | IGLV4-3   | IG_V_gene  | chr22 | 23213686 | 23214214 | + | 403   | 35.84726 | 0.042959 | -1.39921 | 0.333542 | -4.195   | 5.95E-05 | 0.001346 | 1 |
| ENSG0000 | mucosal h | Inflamed | CTD-2369f | lincRNA    | chr19 | 10332111 | 10333870 | - | 1760  | 287.0621 | 0        | -0.74341 | 0.177318 | -4.19253 | 6.01E-05 | 0.001356 | 1 |
| ENSG0000 | mucosal h | Inflamed | RP11-231E | lincRNA    | chr3  | 1.12E+08 | 1.12E+08 | - | 1563  | 17.32458 | 0.069212 | 1.105909 | 0.263788 | 4.192418 | 6.01E-05 | 0.001356 | 1 |
| ENSG0000 | mucosal h | Inflamed | RP11-247L | lincRNA    | chr14 | 50793244 | 50794627 | - | 446   | 41.73747 | 0.011933 | 0.98166  | 0.234157 | 4.19231  | 6.01E-05 | 0.001356 | 1 |
| ENSG0000 | mucosal h | Inflamed | RP1-276N  | lincRNA    | chr6  | 1.61E+08 | 1.61E+08 | + | 467   | 3.520286 | 0.558473 | -1.16464 | 0.277831 | -4.19192 | 6.02E-05 | 0.001357 | 1 |
| ENSG0000 | mucosal h | Inflamed | TACSTD2   | protein_cc | chr1  | 59041099 | 59043166 | - | 2068  | 365.4057 | 0.002387 | -1.30434 | 0.311169 | -4.19173 | 6.03E-05 | 0.001357 | 1 |
| ENSG0000 | mucosal h | Inflamed | IGHV3-43  | IG_V_gene  | chr14 | 1.07E+08 | 1.07E+08 | - | 434   | 2176.747 | 0        | -1.73062 | 0.412946 | -4.19091 | 6.05E-05 | 0.00136  | 1 |
| ENSG0000 | mucosal h | Inflamed | RP11-15H  | pseudoger  | chr19 | 23437855 | 23440741 | - | 2887  | 301.1217 | 0        | 0.677476 | 0.16171  | 4.189455 | 6.08E-05 | 0.001366 | 1 |
| ENSG0000 | mucosal h | Inflamed | RP11-526f | lincRNA    | chr4  | 1.5E+08  | 1.51E+08 | - | 2537  | 9.257757 | 0.243437 | 1.073028 | 0.256241 | 4.187568 | 6.12E-05 | 0.001374 | 1 |
| ENSG0000 | mucosal h | Inflamed | EDN1      | protein_cc | chr6  | 12290596 | 12297427 | + | 2033  | 484.8735 | 0        | 0.652229 | 0.15582  | 4.18578  | 6.16E-05 | 0.001383 | 1 |
| ENSG0000 | mucosal h | Inflamed | PTGIR     | protein_cc | chr19 | 47123725 | 47128375 | - | 3546  | 231.2864 | 0        | -1.20276 | 0.28743  | -4.18453 | 6.19E-05 | 0.001388 | 1 |
| ENSG0000 | mucosal h | Inflamed | SERPINF1  | protein_cc | chr17 | 1665253  | 1680868  | + | 3069  | 2896.527 | 0        | -0.85265 | 0.203784 | -4.18409 | 6.20E-05 | 0.001389 | 1 |
| ENSG0000 | mucosal h | Inflamed | NTNG2     | protein_cc | chr9  | 1.35E+08 | 1.35E+08 | + | 5415  | 101.5036 | 0.00716  | -1.12407 | 0.268675 | -4.18375 | 6.21E-05 | 0.001389 | 1 |
| ENSG0000 | mucosal h | Inflamed | AC010525  | lincRNA    | chr19 | 56207681 | 56208795 | + | 1115  | 31.58711 | 0.042959 | 0.988317 | 0.236266 | 4.183073 | 6.23E-05 | 0.001392 | 1 |
| ENSG0000 | mucosal h | Inflamed | RP11-77K1 | pseudoger  | chr16 | 75533686 | 75550178 | - | 830   | 83.84487 | 0.02148  | 1.292443 | 0.308985 | 4.182873 | 6.23E-05 | 0.001392 | 1 |
| ENSG0000 | mucosal h | Inflamed | RORC      | protein_cc | chr1  | 1.52E+08 | 1.52E+08 | - | 6314  | 1247.835 | 0        | 0.635772 | 0.152021 | 4.18214  | 6.25E-05 | 0.001394 | 1 |
| ENSG0000 | mucosal h | Inflamed | IGLV1-36  | IG_V_gene  | chr22 | 22786296 | 22786802 | + | 392   | 822.7589 | 0.002387 | -1.85221 | 0.443048 | -4.1806  | 6.28E-05 | 0.001401 | 1 |
| ENSG0000 | mucosal h | Inflamed | RP11-126C | antisense  | chr17 | 204528   | 206673   | + | 913   | 21.53461 | 0.045346 | 1.007065 | 0.240937 | 4.17978  | 6.30E-05 | 0.001403 | 1 |

|          |           |          |                     |            |          |          |          |     |          |          |          |          |          |          |          |          |   |
|----------|-----------|----------|---------------------|------------|----------|----------|----------|-----|----------|----------|----------|----------|----------|----------|----------|----------|---|
| ENSG0000 | mucosal h | Inflamed | AL109761. antisense | chr21      | 19165805 | 19183162 | +        | 454 | 2.997613 | 0.391408 | -0.69387 | 0.16601  | -4.1797  | 6.30E-05 | 0.001403 | 1        |   |
| ENSG0000 | mucosal h | Inflamed | C16orf74            | protein_cc | chr16    | 85723690 | 85784735 | -   | 2181     | 90.44153 | 0        | -0.89982 | 0.21533  | -4.17878 | 6.33E-05 | 0.001407 | 1 |
| ENSG0000 | mucosal h | Inflamed | PNLIPRP2            | polymorpt  | chr10    | 1.18E+08 | 1.18E+08 | +   | 1672     | 104.9976 | 0.085919 | 1.811494 | 0.433528 | 4.178492 | 6.33E-05 | 0.001407 | 1 |
| ENSG0000 | mucosal h | Inflamed | RP11-747L           | lincRNA    | chr3     | 1.65E+08 | 1.65E+08 | -   | 1948     | 34.47494 | 0.095465 | 1.448498 | 0.346806 | 4.176674 | 6.38E-05 | 0.001414 | 1 |
| ENSG0000 | mucosal h | Inflamed | MT1A                | protein_cc | chr16    | 56672578 | 56673999 | +   | 396      | 29.65632 | 0.02148  | 1.088496 | 0.260618 | 4.1766   | 6.38E-05 | 0.001414 | 1 |
| ENSG0000 | mucosal h | Inflamed | PPP1R16B            | protein_cc | chr20    | 37434348 | 37551667 | +   | 6400     | 2725.857 | 0        | -0.81685 | 0.19558  | -4.17656 | 6.38E-05 | 0.001414 | 1 |
| ENSG0000 | mucosal h | Inflamed | TMEM98              | protein_cc | chr17    | 31254928 | 31272124 | +   | 5187     | 2284.695 | 0        | 0.584959 | 0.140107 | 4.175098 | 6.41E-05 | 0.001421 | 1 |
| ENSG0000 | mucosal h | Inflamed | CDH3                | protein_cc | chr16    | 68670092 | 68756519 | +   | 5009     | 1551.47  | 0.004773 | -1.78449 | 0.427515 | -4.17411 | 6.44E-05 | 0.001425 | 1 |
| ENSG0000 | mucosal h | Inflamed | IL21-AS1            | antisense  | chr4     | 1.24E+08 | 1.24E+08 | +   | 3748     | 7.816229 | 0.317422 | -1.09843 | 0.263218 | -4.17307 | 6.46E-05 | 0.001429 | 1 |
| ENSG0000 | mucosal h | Inflamed | CYP2AB1P            | pseudoger  | chr3     | 1.84E+08 | 1.84E+08 | -   | 1831     | 7.73031  | 0.486874 | -1.35354 | 0.324399 | -4.17244 | 6.48E-05 | 0.001429 | 1 |
| ENSG0000 | mucosal h | Inflamed | USP54               | protein_cc | chr10    | 75257296 | 75385711 | -   | 9850     | 2835.01  | 0        | 0.816901 | 0.19579  | 4.172329 | 6.48E-05 | 0.001429 | 1 |
| ENSG0000 | mucosal h | Inflamed | LTK                 | protein_cc | chr15    | 41795836 | 41806085 | -   | 3490     | 556.4845 | 0        | 0.62151  | 0.148961 | 4.1723   | 6.48E-05 | 0.001429 | 1 |
| ENSG0000 | mucosal h | Inflamed | FETUB               | protein_cc | chr3     | 1.86E+08 | 1.86E+08 | +   | 2024     | 3.336516 | 0.665871 | 1.083134 | 0.259642 | 4.171651 | 6.50E-05 | 0.001432 | 1 |
| ENSG0000 | mucosal h | Inflamed | IGKV5-2             | IG_V_gene  | chr2     | 89196748 | 89197300 | +   | 408      | 260.4248 | 0.004773 | -1.57963 | 0.378717 | -4.171   | 6.51E-05 | 0.001434 | 1 |
| ENSG0000 | mucosal h | Inflamed | MNX1-AS1            | antisense  | chr7     | 1.57E+08 | 1.57E+08 | +   | 1041     | 19.8043  | 0.026253 | 0.88118  | 0.211284 | 4.170589 | 6.52E-05 | 0.001434 | 1 |
| ENSG0000 | mucosal h | Inflamed | VASN                | protein_cc | chr16    | 4421849  | 4433529  | +   | 2806     | 841.0716 | 0        | -1.12538 | 0.269852 | -4.17035 | 6.53E-05 | 0.001434 | 1 |
| ENSG0000 | mucosal h | Inflamed | LINC00528           | lincRNA    | chr22    | 18260088 | 18262247 | +   | 2160     | 78.65155 | 0.00716  | -1.05523 | 0.253037 | -4.17025 | 6.53E-05 | 0.001434 | 1 |
| ENSG0000 | mucosal h | Inflamed | RP11-420M           | processed  | chr16    | 5289803  | 6826015  | +   | 2019     | 9.508353 | 0.105012 | 0.854598 | 0.204983 | 4.169115 | 6.56E-05 | 0.001439 | 1 |
| ENSG0000 | mucosal h | Inflamed | ENTPD1              | protein_cc | chr10    | 97471536 | 97637023 | +   | 14587    | 1631.439 | 0        | -0.87647 | 0.210264 | -4.16845 | 6.58E-05 | 0.001439 | 1 |
| ENSG0000 | mucosal h | Inflamed | CNN2                | protein_cc | chr19    | 1026298  | 1039068  | +   | 3928     | 6980.864 | 0        | -0.53841 | 0.129167 | -4.16835 | 6.58E-05 | 0.001439 | 1 |
| ENSG0000 | mucosal h | Inflamed | HSPA6               | protein_cc | chr1     | 1.61E+08 | 1.61E+08 | +   | 2646     | 306.5847 | 0        | -1.24141 | 0.297837 | -4.16809 | 6.58E-05 | 0.001439 | 1 |
| ENSG0000 | mucosal h | Inflamed | NOL4                | protein_cc | chr18    | 31431064 | 31804916 | -   | 5687     | 12.04057 | 0.138425 | 1.272763 | 0.305365 | 4.168009 | 6.59E-05 | 0.001439 | 1 |
| ENSG0000 | mucosal h | Inflamed | MMP9                | protein_cc | chr20    | 44637547 | 44645200 | +   | 2336     | 5161.659 | 0        | -1.55644 | 0.373425 | -4.16801 | 6.59E-05 | 0.001439 | 1 |
| ENSG0000 | mucosal h | Inflamed | TMEM44              | protein_cc | chr3     | 1.94E+08 | 1.94E+08 | -   | 4561     | 1178.42  | 0        | 0.548928 | 0.131729 | 4.167115 | 6.61E-05 | 0.001443 | 1 |
| ENSG0000 | mucosal h | Inflamed | RP5-1148A           | antisense  | chr6     | 64280910 | 64282313 | -   | 1404     | 127.3222 | 0        | 0.8059   | 0.193408 | 4.166829 | 6.61E-05 | 0.001443 | 1 |
| ENSG0000 | mucosal h | Inflamed | MUTYH               | protein_cc | chr1     | 45794835 | 45806142 | -   | 3909     | 678.568  | 0        | 0.324713 | 0.07797  | 4.164581 | 6.67E-05 | 0.001454 | 1 |
| ENSG0000 | mucosal h | Inflamed | NOX4                | protein_cc | chr11    | 89057524 | 89322779 | -   | 6327     | 18.32936 | 0.143198 | -1.273   | 0.305731 | -4.1638  | 6.69E-05 | 0.001456 | 1 |
| ENSG0000 | mucosal h | Inflamed | BLVRA               | protein_cc | chr7     | 43798279 | 43846939 | +   | 1819     | 413.5298 | 0        | -0.68817 | 0.165275 | -4.16379 | 6.69E-05 | 0.001456 | 1 |
| ENSG0000 | mucosal h | Inflamed | IL6                 | protein_cc | chr7     | 22765503 | 22771621 | +   | 2711     | 203.0024 | 0.097852 | -2.28482 | 0.548884 | -4.16266 | 6.72E-05 | 0.001461 | 1 |
| ENSG0000 | mucosal h | Inflamed | WDR78               | protein_cc | chr1     | 67278568 | 67390570 | -   | 6700     | 183.7828 | 0        | 1.074935 | 0.258321 | 4.161233 | 6.75E-05 | 0.001468 | 1 |
| ENSG0000 | mucosal h | Inflamed | MARCO               | protein_cc | chr2     | 1.2E+08  | 1.2E+08  | +   | 2079     | 45.34845 | 0.124105 | -1.83545 | 0.441149 | -4.16061 | 6.77E-05 | 0.001468 | 1 |
| ENSG0000 | mucosal h | Inflamed | OLIG2               | protein_cc | chr21    | 34398153 | 34401504 | +   | 3352     | 25.35561 | 0.064439 | -1.19495 | 0.287218 | -4.16044 | 6.77E-05 | 0.001468 | 1 |
| ENSG0000 | mucosal h | Inflamed | FSCN1               | protein_cc | chr7     | 5632439  | 5646286  | +   | 3707     | 2245.971 | 0        | -0.97269 | 0.233799 | -4.16034 | 6.78E-05 | 0.001468 | 1 |
| ENSG0000 | mucosal h | Inflamed | GPR25               | protein_cc | chr1     | 2.01E+08 | 2.01E+08 | +   | 1224     | 28.03103 | 0.02148  | -1.01014 | 0.242805 | -4.1603  | 6.78E-05 | 0.001468 | 1 |
| ENSG0000 | mucosal h | Inflamed | LAMP3               | protein_cc | chr3     | 1.83E+08 | 1.83E+08 | -   | 3816     | 756.2124 | 0        | -1.44299 | 0.346908 | -4.15958 | 6.80E-05 | 0.001471 | 1 |
| ENSG0000 | mucosal h | Inflamed | RP11-138I           | lincRNA    | chr17    | 16343793 | 16344266 | -   | 304      | 4.391408 | 0.198091 | 0.727151 | 0.174835 | 4.15906  | 6.81E-05 | 0.001472 | 1 |
| ENSG0000 | mucosal h | Inflamed | FERMT3              | protein_cc | chr11    | 63974150 | 63991354 | +   | 3062     | 2478.16  | 0        | -0.73666 | 0.17716  | -4.15816 | 6.83E-05 | 0.001473 | 1 |
| ENSG0000 | mucosal h | Inflamed | MKRN1               | protein_cc | chr7     | 1.4E+08  | 1.4E+08  | -   | 5869     | 6197.358 | 0        | 0.501857 | 0.120702 | 4.15782  | 6.84E-05 | 0.001473 | 1 |
| ENSG0000 | mucosal h | Inflamed | CBFA2T2             | protein_cc | chr20    | 32077881 | 32237842 | +   | 9457     | 2558.444 | 0        | 0.606607 | 0.145897 | 4.157776 | 6.84E-05 | 0.001473 | 1 |
| ENSG0000 | mucosal h | Inflamed | MEDAG               | protein_cc | chr13    | 31480328 | 31499709 | +   | 2374     | 188.2864 | 0.026253 | -1.78679 | 0.429748 | -4.15777 | 6.84E-05 | 0.001473 | 1 |

|          |           |          |           |              |       |          |          |   |       |          |          |          |          |          |          |          |   |
|----------|-----------|----------|-----------|--------------|-------|----------|----------|---|-------|----------|----------|----------|----------|----------|----------|----------|---|
| ENSG0000 | mucosal h | Inflamed | MYO1F     | protein_cc   | chr19 | 8585674  | 8642461  | - | 8550  | 2720.11  | 0        | -0.93834 | 0.225687 | -4.15773 | 6.84E-05 | 0.001473 | 1 |
| ENSG0000 | mucosal h | Inflamed | TAPT1-AS1 | antisense    | chr4  | 16228286 | 16321763 | + | 4192  | 143.5847 | 0        | 0.585629 | 0.140925 | 4.155622 | 6.90E-05 | 0.001484 | 1 |
| ENSG0000 | mucosal h | Inflamed | PSME2P2   | pseudoger    | chr13 | 49345264 | 49345965 | + | 702   | 88.68258 | 0        | -0.52263 | 0.125822 | -4.15376 | 6.94E-05 | 0.001492 | 1 |
| ENSG0000 | mucosal h | Inflamed | CXCL17    | protein_cc   | chr19 | 42932440 | 42947200 | - | 1189  | 26.36277 | 0.336516 | -1.85921 | 0.447645 | -4.15331 | 6.96E-05 | 0.001492 | 1 |
| ENSG0000 | mucosal h | Inflamed | IGHM      | IG_C_gene    | chr14 | 1.06E+08 | 1.06E+08 | - | 1461  | 103637.3 | 0        | -1.39805 | 0.336613 | -4.15329 | 6.96E-05 | 0.001492 | 1 |
| ENSG0000 | mucosal h | Inflamed | PTPRN2    | protein_cc   | chr7  | 1.57E+08 | 1.58E+08 | - | 5006  | 1785.747 | 0        | 0.805067 | 0.19385  | 4.15305  | 6.96E-05 | 0.001492 | 1 |
| ENSG0000 | mucosal h | Inflamed | OIT3      | protein_cc   | chr10 | 74653339 | 74692791 | + | 2365  | 30.70644 | 0.054893 | -1.19639 | 0.28808  | -4.15299 | 6.96E-05 | 0.001492 | 1 |
| ENSG0000 | mucosal h | Inflamed | HYAL2     | protein_cc   | chr3  | 50355221 | 50360337 | - | 4545  | 1611.129 | 0        | -0.63304 | 0.152452 | -4.15237 | 6.98E-05 | 0.001494 | 1 |
| ENSG0000 | mucosal h | Inflamed | RP11-269C | lincRNA      | chr17 | 61507829 | 61509572 | - | 552   | 5.145585 | 0.152745 | 0.728801 | 0.175532 | 4.151945 | 6.99E-05 | 0.001495 | 1 |
| ENSG0000 | mucosal h | Inflamed | S1PR1     | protein_cc   | chr1  | 1.02E+08 | 1.02E+08 | + | 3071  | 892.8663 | 0.002387 | -1.07484 | 0.258889 | -4.15173 | 7.00E-05 | 0.001495 | 1 |
| ENSG0000 | mucosal h | Inflamed | MAGI1     | protein_cc   | chr3  | 65339200 | 66024509 | - | 11647 | 1226.033 | 0        | 0.805968 | 0.194129 | 4.151714 | 7.00E-05 | 0.001495 | 1 |
| ENSG0000 | mucosal h | Inflamed | SNORA67   | processed_ch | chr17 | 7476144  | 7485342  | + | 4554  | 676.3914 | 0        | -0.33601 | 0.080947 | -4.15107 | 7.01E-05 | 0.001497 | 1 |
| ENSG0000 | mucosal h | Inflamed | NYAP2     | protein_cc   | chr2  | 2.26E+08 | 2.27E+08 | + | 4832  | 4.675418 | 0.379475 | -1.02772 | 0.24762  | -4.15039 | 7.03E-05 | 0.001499 | 1 |
| ENSG0000 | mucosal h | Inflamed | DNAAF1    | protein_cc   | chr16 | 84178865 | 84212373 | + | 5939  | 22.34368 | 0.198091 | -1.49322 | 0.359837 | -4.14971 | 7.05E-05 | 0.001502 | 1 |
| ENSG0000 | mucosal h | Inflamed | MATN2     | protein_cc   | chr8  | 98881068 | 99048944 | + | 6938  | 3194.919 | 0        | 0.806412 | 0.194336 | 4.149583 | 7.05E-05 | 0.001502 | 1 |
| ENSG0000 | mucosal h | Inflamed | IRG1      | protein_cc   | chr13 | 77522632 | 77532777 | + | 2177  | 59.27446 | 0.386635 | -2.09762 | 0.505594 | -4.14882 | 7.07E-05 | 0.001505 | 1 |
| ENSG0000 | mucosal h | Inflamed | KLKP1     | pseudoger    | chr19 | 51385352 | 51399654 | - | 1912  | 1.408115 | 0.75179  | 0.509707 | 0.122864 | 4.148559 | 7.08E-05 | 0.001505 | 1 |
| ENSG0000 | mucosal h | Inflamed | SPHK1     | protein_cc   | chr17 | 74372665 | 74383941 | + | 4416  | 570.2649 | 0        | -1.15484 | 0.278391 | -4.14826 | 7.09E-05 | 0.001505 | 1 |
| ENSG0000 | mucosal h | Inflamed | MNDA      | protein_cc   | chr1  | 1.59E+08 | 1.59E+08 | + | 2059  | 520.1002 | 0        | -1.51852 | 0.366147 | -4.14731 | 7.11E-05 | 0.001509 | 1 |
| ENSG0000 | mucosal h | Inflamed | COX19     | protein_cc   | chr7  | 938415   | 1015235  | - | 5542  | 688.9952 | 0        | 0.377685 | 0.091069 | 4.147219 | 7.12E-05 | 0.001509 | 1 |
| ENSG0000 | mucosal h | Inflamed | HOXB5     | protein_cc   | chr17 | 46668619 | 46671323 | - | 2041  | 964.7112 | 0        | 0.932229 | 0.224805 | 4.146836 | 7.13E-05 | 0.001509 | 1 |
| ENSG0000 | mucosal h | Inflamed | 02-Mar    | protein_cc   | chr1  | 2.21E+08 | 2.21E+08 | + | 2590  | 611.031  | 0        | 0.480884 | 0.115966 | 4.14678  | 7.13E-05 | 0.001509 | 1 |
| ENSG0000 | mucosal h | Inflamed | RAPGEFL1  | protein_cc   | chr17 | 38333263 | 38351908 | + | 5710  | 6827.659 | 0        | 0.983742 | 0.237254 | 4.146368 | 7.14E-05 | 0.00151  | 1 |
| ENSG0000 | mucosal h | Inflamed | GSTO2     | protein_cc   | chr10 | 1.06E+08 | 1.06E+08 | + | 10344 | 548.5131 | 0        | 0.697687 | 0.168304 | 4.1454   | 7.16E-05 | 0.001512 | 1 |
| ENSG0000 | mucosal h | Inflamed | HMG1P7    | pseudoger    | chr3  | 93707478 | 93707790 | - | 313   | 4.761337 | 0.238663 | 0.82559  | 0.199164 | 4.145277 | 7.17E-05 | 0.001512 | 1 |
| ENSG0000 | mucosal h | Inflamed | TUBB3     | protein_cc   | chr16 | 89987800 | 90005169 | + | 6138  | 35.39379 | 0.019093 | -1.11959 | 0.270096 | -4.14514 | 7.17E-05 | 0.001512 | 1 |
| ENSG0000 | mucosal h | Inflamed | RAMP2     | protein_cc   | chr17 | 40910465 | 40915059 | + | 1148  | 587.0024 | 0        | -0.98702 | 0.238117 | -4.14511 | 7.17E-05 | 0.001512 | 1 |
| ENSG0000 | mucosal h | Inflamed | AC004466  | protein_cc   | chr12 | 48178706 | 48179787 | + | 1082  | 27.76372 | 0.009547 | 0.657601 | 0.15867  | 4.144454 | 7.19E-05 | 0.001514 | 1 |
| ENSG0000 | mucosal h | Inflamed | WNT7A     | protein_cc   | chr3  | 13857755 | 13921618 | - | 4579  | 5.470167 | 0.501193 | -1.34309 | 0.324138 | -4.14356 | 7.21E-05 | 0.001518 | 1 |
| ENSG0000 | mucosal h | Inflamed | SMTNL2    | protein_cc   | chr17 | 4487294  | 4511614  | + | 2470  | 34.45107 | 0.00716  | -0.98414 | 0.237544 | -4.14297 | 7.23E-05 | 0.001519 | 1 |
| ENSG0000 | mucosal h | Inflamed | AC093847  | pseudoger    | chr4  | 92949929 | 92950119 | + | 189   | 13.29117 | 0.427208 | 1.24812  | 0.301265 | 4.142929 | 7.23E-05 | 0.001519 | 1 |
| ENSG0000 | mucosal h | Inflamed | WNT5A-AS  | antisense    | chr3  | 55521727 | 55522336 | + | 500   | 2.642005 | 0.479714 | -0.80288 | 0.193813 | -4.14253 | 7.24E-05 | 0.00152  | 1 |
| ENSG0000 | mucosal h | Inflamed | AMT       | protein_cc   | chr3  | 49454211 | 49460186 | - | 4561  | 778.3532 | 0        | 0.655741 | 0.158322 | 4.141819 | 7.26E-05 | 0.001523 | 1 |
| ENSG0000 | mucosal h | Inflamed | BACE2     | protein_cc   | chr21 | 42539728 | 42654445 | + | 9619  | 7111.062 | 0        | -0.59307 | 0.143198 | -4.14158 | 7.27E-05 | 0.001523 | 1 |
| ENSG0000 | mucosal h | Inflamed | INHBB     | protein_cc   | chr2  | 1.21E+08 | 1.21E+08 | + | 3204  | 133.494  | 0.016706 | -1.12321 | 0.271265 | -4.14062 | 7.29E-05 | 0.001526 | 1 |
| ENSG0000 | mucosal h | Inflamed | CDKN2B    | protein_cc   | chr9  | 22002902 | 22009362 | - | 4058  | 2655.298 | 0        | 1.205513 | 0.291144 | 4.140603 | 7.29E-05 | 0.001526 | 1 |
| ENSG0000 | mucosal h | Inflamed | LUCAT1    | lincRNA      | chr5  | 90598846 | 90610219 | - | 2904  | 88.7685  | 0.176611 | -2.04987 | 0.495103 | -4.1403  | 7.30E-05 | 0.001526 | 1 |
| ENSG0000 | mucosal h | Inflamed | DCSTAMP   | protein_cc   | chr8  | 1.05E+08 | 1.05E+08 | + | 2778  | 13.08592 | 0.224344 | -1.18922 | 0.287239 | -4.14018 | 7.30E-05 | 0.001526 | 1 |
| ENSG0000 | mucosal h | Inflamed | RP11-279F | lincRNA      | chr15 | 69755365 | 69863775 | + | 2815  | 61.31742 | 0.026253 | 1.322612 | 0.319485 | 4.139819 | 7.31E-05 | 0.001526 | 1 |
| ENSG0000 | mucosal h | Inflamed | RP11-15H  | processed_ch | chr19 | 23442708 | 23457053 | - | 5091  | 142.5728 | 0        | 0.726572 | 0.175508 | 4.139814 | 7.31E-05 | 0.001526 | 1 |

|          |           |          |           |            |       |          |          |   |      |          |          |          |          |          |          |          |   |
|----------|-----------|----------|-----------|------------|-------|----------|----------|---|------|----------|----------|----------|----------|----------|----------|----------|---|
| ENSG0000 | mucosal h | Inflamed | RP11-536C | lincRNA    | chr9  | 13446490 | 13487510 | + | 512  | 11.82578 | 0.238663 | -1.15906 | 0.28001  | -4.13937 | 7.33E-05 | 0.001527 | 1 |
| ENSG0000 | mucosal h | Inflamed | SLC47A1   | protein_cc | chr17 | 19398698 | 19482347 | + | 5719 | 141.0024 | 0        | -0.76107 | 0.183915 | -4.13818 | 7.36E-05 | 0.001532 | 1 |
| ENSG0000 | mucosal h | Inflamed | XX-C283C7 | antisense  | chr22 | 50753060 | 50754437 | + | 531  | 2.505967 | 0.47494  | -0.71591 | 0.173014 | -4.13786 | 7.37E-05 | 0.001532 | 1 |
| ENSG0000 | mucosal h | Inflamed | MAPKAPK1  | lincRNA    | chr12 | 1.12E+08 | 1.12E+08 | - | 2287 | 387.6563 | 0        | 0.515608 | 0.12461  | 4.137773 | 7.37E-05 | 0.001532 | 1 |
| ENSG0000 | mucosal h | Inflamed | ELFN1     | protein_cc | chr7  | 1727755  | 1787590  | + | 3845 | 89.04057 | 0.019093 | -1.25607 | 0.303569 | -4.13769 | 7.37E-05 | 0.001532 | 1 |
| ENSG0000 | mucosal h | Inflamed | ODF3B     | protein_cc | chr22 | 50968139 | 50971009 | - | 2301 | 721.4391 | 0        | -0.88319 | 0.213457 | -4.13758 | 7.38E-05 | 0.001532 | 1 |
| ENSG0000 | mucosal h | Inflamed | IGHV4-61  | IG_V_gene  | chr14 | 1.07E+08 | 1.07E+08 | - | 455  | 3810.208 | 0        | -1.56238 | 0.377648 | -4.13714 | 7.39E-05 | 0.001533 | 1 |
| ENSG0000 | mucosal h | Inflamed | SNAI1     | protein_cc | chr20 | 48599536 | 48605423 | + | 1686 | 195.7446 | 0.002387 | -1.2282  | 0.296909 | -4.13663 | 7.40E-05 | 0.001535 | 1 |
| ENSG0000 | mucosal h | Inflamed | HES2      | protein_cc | chr1  | 6472478  | 6484730  | - | 5407 | 1066.761 | 0        | 1.0299   | 0.249008 | 4.136017 | 7.42E-05 | 0.001537 | 1 |
| ENSG0000 | mucosal h | Inflamed | CLEC6A    | protein_cc | chr12 | 8608522  | 8630926  | + | 1682 | 9.28401  | 0.367542 | -1.29143 | 0.312254 | -4.13582 | 7.42E-05 | 0.001537 | 1 |
| ENSG0000 | mucosal h | Inflamed | TRIM3     | protein_cc | chr11 | 6469843  | 6495689  | - | 6710 | 1498.723 | 0        | 0.588189 | 0.142247 | 4.134976 | 7.45E-05 | 0.00154  | 1 |
| ENSG0000 | mucosal h | Inflamed | MTRNR2L5  | protein_cc | chr6  | 62284008 | 62284534 | + | 527  | 4.396181 | 0.293556 | 0.695774 | 0.168293 | 4.134305 | 7.47E-05 | 0.001542 | 1 |
| ENSG0000 | mucosal h | Inflamed | SIRPB1    | protein_cc | chr20 | 1544167  | 1600707  | - | 6091 | 299.5322 | 0        | -1.34492 | 0.325315 | -4.13421 | 7.47E-05 | 0.001542 | 1 |
| ENSG0000 | mucosal h | Inflamed | UTS2R     | protein_cc | chr17 | 80332153 | 80333462 | + | 1310 | 32.95704 | 0.0358   | -1.12316 | 0.271693 | -4.13391 | 7.48E-05 | 0.001542 | 1 |
| ENSG0000 | mucosal h | Inflamed | HCLS1     | protein_cc | chr3  | 1.21E+08 | 1.21E+08 | - | 5093 | 2983.026 | 0        | -0.79163 | 0.191502 | -4.13383 | 7.48E-05 | 0.001542 | 1 |
| ENSG0000 | mucosal h | Inflamed | PMFBP1    | protein_cc | chr16 | 72146056 | 72210777 | - | 5691 | 51.01193 | 0.011933 | 1.095526 | 0.265176 | 4.13131  | 7.55E-05 | 0.001555 | 1 |
| ENSG0000 | mucosal h | Inflamed | FAM212A   | protein_cc | chr3  | 49840687 | 49842463 | + | 1040 | 44.84964 | 0        | -0.87313 | 0.211417 | -4.12989 | 7.59E-05 | 0.001562 | 1 |
| ENSG0000 | mucosal h | Inflamed | RP11-81H1 | lincRNA    | chr12 | 68726668 | 68845443 | - | 2695 | 85.72554 | 0.002387 | -1.01574 | 0.245981 | -4.12934 | 7.60E-05 | 0.001564 | 1 |
| ENSG0000 | mucosal h | Inflamed | RP11-649C | antisense  | chr8  | 1.08E+08 | 1.08E+08 | - | 504  | 6.408115 | 0.202864 | 0.85723  | 0.207607 | 4.129095 | 7.61E-05 | 0.001564 | 1 |
| ENSG0000 | mucosal h | Inflamed | QPCTL     | protein_cc | chr19 | 46195741 | 46207247 | + | 2396 | 569.6802 | 0        | -0.48249 | 0.116859 | -4.12878 | 7.62E-05 | 0.001565 | 1 |
| ENSG0000 | mucosal h | Inflamed | AVEN      | protein_cc | chr15 | 34158428 | 34331377 | - | 1808 | 417.6444 | 0        | -0.34174 | 0.082786 | -4.12806 | 7.64E-05 | 0.001567 | 1 |
| ENSG0000 | mucosal h | Inflamed | CEP128    | protein_cc | chr14 | 80943330 | 81425861 | - | 9495 | 168.4821 | 0        | -1.11471 | 0.270059 | -4.12764 | 7.65E-05 | 0.001567 | 1 |
| ENSG0000 | mucosal h | Inflamed | NOS2P3    | pseudoger  | chr17 | 20339650 | 20350557 | + | 3638 | 1.933174 | 0.536993 | 0.698677 | 0.169269 | 4.1276   | 7.65E-05 | 0.001567 | 1 |
| ENSG0000 | mucosal h | Inflamed | FAM20C    | protein_cc | chr7  | 192969   | 300711   | + | 4629 | 2496.504 | 0        | -0.91482 | 0.221637 | -4.12756 | 7.65E-05 | 0.001567 | 1 |
| ENSG0000 | mucosal h | Inflamed | EIF4EBP3  | protein_cc | chr5  | 1.4E+08  | 1.4E+08  | + | 691  | 77.2673  | 0        | 0.59694  | 0.144648 | 4.126849 | 7.67E-05 | 0.00157  | 1 |
| ENSG0000 | mucosal h | Inflamed | PCSK6     | protein_cc | chr15 | 1.02E+08 | 1.02E+08 | - | 9348 | 2759.527 | 0        | 0.819707 | 0.198699 | 4.125372 | 7.72E-05 | 0.001578 | 1 |
| ENSG0000 | mucosal h | Inflamed | ZSWIM5    | protein_cc | chr1  | 45482071 | 45771881 | - | 6046 | 778.2601 | 0        | 0.842475 | 0.204276 | 4.124206 | 7.75E-05 | 0.001583 | 1 |
| ENSG0000 | mucosal h | Inflamed | FAM47E    | protein_cc | chr4  | 77135193 | 77204933 | + | 9508 | 51.40811 | 0.002387 | 1.053417 | 0.255483 | 4.123229 | 7.78E-05 | 0.001588 | 1 |
| ENSG0000 | mucosal h | Inflamed | G6PC2     | protein_cc | chr2  | 1.7E+08  | 1.7E+08  | + | 3120 | 1.77327  | 0.610979 | 0.641503 | 0.155614 | 4.122404 | 7.80E-05 | 0.001591 | 1 |
| ENSG0000 | mucosal h | Inflamed | MED9      | protein_cc | chr17 | 17380300 | 17396540 | + | 2940 | 671.4057 | 0        | 0.298449 | 0.072407 | 4.121824 | 7.82E-05 | 0.001593 | 1 |
| ENSG0000 | mucosal h | Inflamed | AF064860  | sense_ove  | chr21 | 41002198 | 41098012 | + | 544  | 2.673031 | 0.522673 | 0.919689 | 0.223226 | 4.119994 | 7.87E-05 | 0.001603 | 1 |
| ENSG0000 | mucosal h | Inflamed | CA2       | protein_cc | chr8  | 86376081 | 86393722 | + | 2123 | 25945.15 | 0        | 1.33803  | 0.324775 | 4.119874 | 7.88E-05 | 0.001603 | 1 |
| ENSG0000 | mucosal h | Inflamed | KRT17     | protein_cc | chr17 | 39775689 | 39781094 | - | 2537 | 240.7399 | 0.181384 | -2.42025 | 0.587523 | -4.11941 | 7.89E-05 | 0.001604 | 1 |
| ENSG0000 | mucosal h | Inflamed | FAM46C    | protein_cc | chr1  | 1.18E+08 | 1.18E+08 | + | 5751 | 5750.726 | 0        | -0.93947 | 0.228129 | -4.11815 | 7.93E-05 | 0.00161  | 1 |
| ENSG0000 | mucosal h | Inflamed | PCDH17    | protein_cc | chr13 | 58205944 | 58303445 | + | 8242 | 323.074  | 0.00716  | -1.19413 | 0.289978 | -4.11801 | 7.93E-05 | 0.00161  | 1 |
| ENSG0000 | mucosal h | Inflamed | NDRG2     | protein_cc | chr14 | 21484922 | 21539031 | - | 7550 | 4164.998 | 0        | 0.731114 | 0.177603 | 4.116564 | 7.97E-05 | 0.001617 | 1 |
| ENSG0000 | mucosal h | Inflamed | DGUOK-A5  | antisense  | chr2  | 74174769 | 74208568 | - | 865  | 39.84248 | 0.002387 | 0.836172 | 0.203155 | 4.115936 | 7.99E-05 | 0.00162  | 1 |
| ENSG0000 | mucosal h | Inflamed | SLC25A34  | protein_cc | chr1  | 16062900 | 16067891 | + | 3195 | 597.8926 | 0        | 1.063098 | 0.258387 | 4.114368 | 8.04E-05 | 0.001628 | 1 |
| ENSG0000 | mucosal h | Inflamed | RP11-862C | lincRNA    | chr14 | 93372042 | 93373827 | - | 1384 | 1.491647 | 0.663484 | 0.565149 | 0.13744  | 4.111969 | 8.11E-05 | 0.00164  | 1 |
| ENSG0000 | mucosal h | Inflamed | IGHV4OR1  | IG_V_gene  | chr15 | 22472918 | 22473353 | - | 353  | 1465.874 | 0.004773 | -1.69667 | 0.412629 | -4.11186 | 8.11E-05 | 0.00164  | 1 |

|          |           |          |           |            |       |          |          |   |      |          |          |          |          |          |          |          |   |
|----------|-----------|----------|-----------|------------|-------|----------|----------|---|------|----------|----------|----------|----------|----------|----------|----------|---|
| ENSG0000 | mucosal h | Inflamed | IGKV1D-43 | IG_V_gene  | chr2  | 90248739 | 90249395 | + | 532  | 18.03103 | 0.121718 | -1.26248 | 0.307038 | -4.11179 | 8.11E-05 | 0.00164  | 1 |
| ENSG0000 | mucosal h | Inflamed | SEC14L2   | protein_cc | chr22 | 30792846 | 30821305 | + | 5984 | 215.2411 | 0        | -0.88161 | 0.214431 | -4.1114  | 8.13E-05 | 0.001641 | 1 |
| ENSG0000 | mucosal h | Inflamed | CTD-2521  | lincRNA    | chr19 | 17516503 | 17529713 | + | 2525 | 228.5895 | 0        | -0.59261 | 0.144158 | -4.11083 | 8.14E-05 | 0.001643 | 1 |
| ENSG0000 | mucosal h | Inflamed | CBR3      | protein_cc | chr21 | 37507210 | 37518864 | + | 1169 | 142.821  | 0        | -0.74356 | 0.180887 | -4.11063 | 8.15E-05 | 0.001643 | 1 |
| ENSG0000 | mucosal h | Inflamed | LMCD1     | protein_cc | chr3  | 8543393  | 8609805  | + | 2578 | 513.1599 | 0        | -0.97621 | 0.237556 | -4.10937 | 8.19E-05 | 0.001649 | 1 |
| ENSG0000 | mucosal h | Inflamed | PLEKHO2   | protein_cc | chr15 | 65134088 | 65160206 | + | 3720 | 2532.547 | 0        | -0.84259 | 0.205051 | -4.10915 | 8.19E-05 | 0.00165  | 1 |
| ENSG0000 | mucosal h | Inflamed | THBS2     | protein_cc | chr6  | 1.7E+08  | 1.7E+08  | - | 6397 | 1202.045 | 0.002387 | -1.82372 | 0.443995 | -4.10753 | 8.24E-05 | 0.001657 | 1 |
| ENSG0000 | mucosal h | Inflamed | HIST1H2B  | protein_cc | chr6  | 26115101 | 26124154 | - | 834  | 82.53461 | 0        | -0.95313 | 0.23205  | -4.10745 | 8.25E-05 | 0.001657 | 1 |
| ENSG0000 | mucosal h | Inflamed | TTLL8     | protein_cc | chr22 | 50453552 | 50495364 | - | 2707 | 2.210024 | 0.615752 | -0.78867 | 0.192096 | -4.10559 | 8.30E-05 | 0.001668 | 1 |
| ENSG0000 | mucosal h | Inflamed | IGKV1D-12 | IG_V_gene  | chr2  | 90198535 | 90199190 | + | 532  | 1896.802 | 0.002387 | -1.74035 | 0.424034 | -4.10428 | 8.34E-05 | 0.001674 | 1 |
| ENSG0000 | mucosal h | Inflamed | RP11-647F | pseudoger  | chr4  | 1.22E+08 | 1.22E+08 | + | 436  | 2.109785 | 0.577566 | 0.700163 | 0.170603 | 4.10405  | 8.35E-05 | 0.001674 | 1 |
| ENSG0000 | mucosal h | Inflamed | IGSF9     | protein_cc | chr1  | 1.6E+08  | 1.6E+08  | - | 6620 | 2412.463 | 0        | 1.438309 | 0.350475 | 4.103891 | 8.35E-05 | 0.001674 | 1 |
| ENSG0000 | mucosal h | Inflamed | AQP7      | protein_cc | chr9  | 33384765 | 33402643 | - | 2091 | 200.6396 | 0.00716  | 1.547782 | 0.377205 | 4.103291 | 8.37E-05 | 0.001677 | 1 |
| ENSG0000 | mucosal h | Inflamed | EPHX4     | protein_cc | chr1  | 92495539 | 92529093 | + | 2251 | 28.05251 | 0.019093 | -1.04364 | 0.254374 | -4.10276 | 8.39E-05 | 0.001679 | 1 |
| ENSG0000 | mucosal h | Inflamed | RP11-1036 | lincRNA    | chr11 | 59036349 | 59051506 | - | 2805 | 17.1432  | 0.121718 | 1.303303 | 0.317765 | 4.101465 | 8.43E-05 | 0.001685 | 1 |
| ENSG0000 | mucosal h | Inflamed | RP11-77K1 | sense_intr | chr16 | 75492150 | 75493915 | - | 852  | 6.460621 | 0.205251 | 0.837425 | 0.204244 | 4.100119 | 8.47E-05 | 0.001692 | 1 |
| ENSG0000 | mucosal h | Inflamed | RP11-23J1 | pseudoger  | chr12 | 47529281 | 47532153 | - | 603  | 8.875895 | 0.088305 | -0.82585 | 0.201457 | -4.0994  | 8.49E-05 | 0.001696 | 1 |
| ENSG0000 | mucosal h | Inflamed | CFDP1     | protein_cc | chr16 | 75327596 | 75467383 | - | 3230 | 1057.272 | 0        | 0.479859 | 0.117063 | 4.099167 | 8.50E-05 | 0.001696 | 1 |
| ENSG0000 | mucosal h | Inflamed | PILRA     | protein_cc | chr7  | 99965153 | 99997719 | + | 2003 | 502.4702 | 0        | -0.98811 | 0.241251 | -4.09578 | 8.61E-05 | 0.001716 | 1 |
| ENSG0000 | mucosal h | Inflamed | CXCR6     | protein_cc | chr3  | 45982425 | 45989845 | + | 3769 | 257.6396 | 0        | -0.79346 | 0.193739 | -4.0955  | 8.62E-05 | 0.001716 | 1 |
| ENSG0000 | mucosal h | Inflamed | TMIGD1    | protein_cc | chr17 | 28643351 | 28661077 | - | 1228 | 954.4368 | 0.023866 | 2.430079 | 0.593432 | 4.094958 | 8.63E-05 | 0.001718 | 1 |
| ENSG0000 | mucosal h | Inflamed | ARID5A    | protein_cc | chr2  | 97202480 | 97218375 | + | 3565 | 1579.573 | 0        | -0.76251 | 0.186214 | -4.0948  | 8.64E-05 | 0.001718 | 1 |
| ENSG0000 | mucosal h | Inflamed | RP11-459C | lincRNA    | chr17 | 3880397  | 3885193  | + | 549  | 9.747017 | 0.088305 | 0.85006  | 0.207681 | 4.09311  | 8.69E-05 | 0.001728 | 1 |
| ENSG0000 | mucosal h | Inflamed | IGLV2-33  | IG_V_gene  | chr22 | 22930626 | 22931145 | + | 398  | 46.97136 | 0.031026 | -1.28477 | 0.313962 | -4.09211 | 8.73E-05 | 0.001732 | 1 |
| ENSG0000 | mucosal h | Inflamed | CYTIP     | protein_cc | chr2  | 1.58E+08 | 1.58E+08 | - | 3428 | 757.3556 | 0        | -0.97725 | 0.238821 | -4.09197 | 8.73E-05 | 0.001732 | 1 |
| ENSG0000 | mucosal h | Inflamed | TMEM192   | protein_cc | chr4  | 1.66E+08 | 1.66E+08 | - | 6427 | 622.2888 | 0        | 0.59834  | 0.146276 | 4.09048  | 8.78E-05 | 0.001741 | 1 |
| ENSG0000 | mucosal h | Inflamed | APOBEC3A  | protein_cc | chr22 | 39348746 | 39359188 | + | 2010 | 296.2936 | 0.004773 | -2.00536 | 0.490342 | -4.08972 | 8.80E-05 | 0.001744 | 1 |
| ENSG0000 | mucosal h | Inflamed | SERPINF2  | protein_cc | chr17 | 1646130  | 1658562  | + | 2348 | 170.5847 | 0        | -0.74896 | 0.183155 | -4.08921 | 8.82E-05 | 0.001746 | 1 |
| ENSG0000 | mucosal h | Inflamed | MYBPH     | protein_cc | chr1  | 2.03E+08 | 2.03E+08 | - | 1805 | 13.54893 | 0.217184 | -1.28288 | 0.31376  | -4.08873 | 8.84E-05 | 0.001747 | 1 |
| ENSG0000 | mucosal h | Inflamed | COG1      | protein_cc | chr17 | 71189129 | 71204646 | + | 5061 | 2020.234 | 0        | 0.389646 | 0.095301 | 4.088592 | 8.84E-05 | 0.001747 | 1 |
| ENSG0000 | mucosal h | Inflamed | P4HA3     | protein_cc | chr11 | 73946846 | 74022702 | - | 4009 | 82.90215 | 0.00716  | -1.64448 | 0.4023   | -4.08769 | 8.87E-05 | 0.001752 | 1 |
| ENSG0000 | mucosal h | Inflamed | SNCAIP    | protein_cc | chr5  | 1.22E+08 | 1.22E+08 | + | 7325 | 218.2291 | 0.002387 | -0.96314 | 0.235671 | -4.08678 | 8.90E-05 | 0.001755 | 1 |
| ENSG0000 | mucosal h | Inflamed | TRHDE     | protein_cc | chr12 | 72481046 | 73059422 | + | 6835 | 118.0095 | 0.016706 | 1.352269 | 0.33089  | 4.086765 | 8.90E-05 | 0.001755 | 1 |
| ENSG0000 | mucosal h | Inflamed | P4HB      | protein_cc | chr17 | 79801035 | 79818570 | - | 5303 | 50454    | 0        | -0.36034 | 0.088195 | -4.08573 | 8.93E-05 | 0.001761 | 1 |
| ENSG0000 | mucosal h | Inflamed | SERPINB9  | protein_cc | chr6  | 2887500  | 2903514  | - | 4118 | 1617.594 | 0        | -1.00596 | 0.246232 | -4.08541 | 8.94E-05 | 0.001761 | 1 |
| ENSG0000 | mucosal h | Inflamed | TNFAIP6   | protein_cc | chr2  | 1.52E+08 | 1.52E+08 | + | 1577 | 173.4845 | 0.00716  | -1.65374 | 0.404913 | -4.08418 | 8.98E-05 | 0.001768 | 1 |
| ENSG0000 | mucosal h | Inflamed | RP11-712E | pseudoger  | chr11 | 94876801 | 94878289 | + | 1489 | 1.706444 | 0.599045 | 0.651028 | 0.159482 | 4.082134 | 9.05E-05 | 0.00178  | 1 |
| ENSG0000 | mucosal h | Inflamed | EFNA1     | protein_cc | chr1  | 1.55E+08 | 1.55E+08 | + | 2539 | 2433.036 | 0        | 0.734477 | 0.179955 | 4.081454 | 9.08E-05 | 0.001783 | 1 |
| ENSG0000 | mucosal h | Inflamed | LSM10     | protein_cc | chr1  | 36856839 | 36863493 | - | 1496 | 614.4845 | 0        | -0.55281 | 0.13545  | -4.08128 | 9.08E-05 | 0.001783 | 1 |
| ENSG0000 | mucosal h | Inflamed | LIMD2     | protein_cc | chr17 | 61773262 | 61778532 | - | 4745 | 1731.406 | 0        | -0.98369 | 0.241059 | -4.08073 | 9.10E-05 | 0.001785 | 1 |

|          |           |          |           |            |       |          |          |   |       |          |          |          |          |          |          |          |   |
|----------|-----------|----------|-----------|------------|-------|----------|----------|---|-------|----------|----------|----------|----------|----------|----------|----------|---|
| ENSG0000 | mucosal h | Inflamed | CD1B      | protein_cc | chr1  | 1.58E+08 | 1.58E+08 | - | 1395  | 23.73747 | 0.124105 | -1.36391 | 0.334295 | -4.07998 | 9.12E-05 | 0.001789 | 1 |
| ENSG0000 | mucosal h | Inflamed | RP1-1700  | lincRNA    | chr7  | 27226192 | 27233067 | - | 556   | 48.48449 | 0.054893 | 0.922792 | 0.226208 | 4.079391 | 9.14E-05 | 0.001791 | 1 |
| ENSG0000 | mucosal h | Inflamed | RP4-584D  | antisense  | chr7  | 1.5E+08  | 1.5E+08  | - | 577   | 13.50119 | 0.062053 | 0.78294  | 0.19199  | 4.078014 | 9.19E-05 | 0.001799 | 1 |
| ENSG0000 | mucosal h | Inflamed | AQP8      | protein_cc | chr16 | 25227052 | 25240261 | + | 1421  | 12233.81 | 0.019093 | 3.352621 | 0.822175 | 4.077746 | 9.20E-05 | 0.0018   | 1 |
| ENSG0000 | mucosal h | Inflamed | RNU6-418  | snRNA      | chr1  | 2.06E+08 | 2.06E+08 | + | 107   | 2.763723 | 0.498807 | 0.837761 | 0.205475 | 4.077181 | 9.22E-05 | 0.001802 | 1 |
| ENSG0000 | mucosal h | Inflamed | PLIN1     | protein_cc | chr15 | 90207596 | 90222658 | - | 3797  | 60.27208 | 0.02148  | 0.991316 | 0.243145 | 4.07705  | 9.22E-05 | 0.001802 | 1 |
| ENSG0000 | mucosal h | Inflamed | TMEM132   | protein_cc | chr11 | 60691935 | 60704631 | + | 7271  | 1303.153 | 0        | -1.21509 | 0.29815  | -4.07543 | 9.28E-05 | 0.00181  | 1 |
| ENSG0000 | mucosal h | Inflamed | AFG3L2    | protein_cc | chr18 | 12328943 | 12377313 | - | 6624  | 3582.146 | 0        | 0.559762 | 0.137357 | 4.075227 | 9.29E-05 | 0.00181  | 1 |
| ENSG0000 | mucosal h | Inflamed | RP4-740C  | processed  | chr1  | 2281853  | 2284259  | - | 2407  | 90.20048 | 0.002387 | 0.735876 | 0.180575 | 4.075175 | 9.29E-05 | 0.00181  | 1 |
| ENSG0000 | mucosal h | Inflamed | KIAA1456  | protein_cc | chr8  | 12803151 | 12889012 | + | 14668 | 258.2554 | 0        | 1.068095 | 0.262144 | 4.074461 | 9.31E-05 | 0.001813 | 1 |
| ENSG0000 | mucosal h | Inflamed | SMIM14    | protein_cc | chr4  | 39547950 | 39640710 | - | 6721  | 3891.99  | 0        | 0.731688 | 0.179662 | 4.072576 | 9.38E-05 | 0.001824 | 1 |
| ENSG0000 | mucosal h | Inflamed | FCGRT     | protein_cc | chr19 | 50010073 | 50029590 | + | 4173  | 10647.51 | 0        | 0.518747 | 0.12738  | 4.072446 | 9.38E-05 | 0.001824 | 1 |
| ENSG0000 | mucosal h | Inflamed | RASSF5    | protein_cc | chr1  | 2.07E+08 | 2.07E+08 | + | 6174  | 2484.807 | 0        | -0.82101 | 0.201636 | -4.07177 | 9.40E-05 | 0.001827 | 1 |
| ENSG0000 | mucosal h | Inflamed | RILPL2    | protein_cc | chr12 | 1.24E+08 | 1.24E+08 | - | 1435  | 516.969  | 0        | -0.66108 | 0.162375 | -4.07134 | 9.42E-05 | 0.001828 | 1 |
| ENSG0000 | mucosal h | Inflamed | SLC4A9    | protein_cc | chr5  | 1.4E+08  | 1.4E+08  | + | 3635  | 10.73747 | 0.138425 | 0.918411 | 0.225581 | 4.071309 | 9.42E-05 | 0.001828 | 1 |
| ENSG0000 | mucosal h | Inflamed | CDHR3     | protein_cc | chr7  | 1.06E+08 | 1.06E+08 | + | 9794  | 132.9809 | 0        | 0.84355  | 0.207205 | 4.071095 | 9.43E-05 | 0.001828 | 1 |
| ENSG0000 | mucosal h | Inflamed | IGHV3OR1  | IG_V_gene  | chr16 | 33629681 | 33630128 | + | 353   | 23.45585 | 0.057279 | -1.14034 | 0.280188 | -4.06992 | 9.47E-05 | 0.001834 | 1 |
| ENSG0000 | mucosal h | Inflamed | SERINC5   | protein_cc | chr5  | 79407050 | 79551898 | - | 5107  | 1225.523 | 0        | 0.721336 | 0.17727  | 4.06914  | 9.50E-05 | 0.001838 | 1 |
| ENSG0000 | mucosal h | Inflamed | ZDHHC7    | protein_cc | chr16 | 85007787 | 85045141 | - | 3947  | 3599.253 | 0        | 0.38927  | 0.095667 | 4.069029 | 9.50E-05 | 0.001838 | 1 |
| ENSG0000 | mucosal h | Inflamed | ASPHD2    | protein_cc | chr22 | 26825239 | 26840981 | + | 3357  | 627.463  | 0        | -0.52578 | 0.129223 | -4.06874 | 9.51E-05 | 0.001838 | 1 |
| ENSG0000 | mucosal h | Inflamed | IGHV1-8   | IG_V_gene  | chr14 | 1.07E+08 | 1.07E+08 | - | 413   | 2662.893 | 0.031026 | -1.81971 | 0.447323 | -4.068   | 9.54E-05 | 0.001842 | 1 |
| ENSG0000 | mucosal h | Inflamed | ECEL1     | protein_cc | chr2  | 2.33E+08 | 2.33E+08 | - | 2972  | 15.15274 | 0.176611 | -1.41826 | 0.348661 | -4.06772 | 9.55E-05 | 0.001842 | 1 |
| ENSG0000 | mucosal h | Inflamed | AC017002  | lincRNA    | chr2  | 1.12E+08 | 1.12E+08 | + | 757   | 9.98568  | 0.088305 | -0.96338 | 0.236861 | -4.06729 | 9.56E-05 | 0.001844 | 1 |
| ENSG0000 | mucosal h | Inflamed | SORBS3    | protein_cc | chr8  | 22402499 | 22433301 | + | 6110  | 3242.993 | 0        | 0.595427 | 0.14641  | 4.066852 | 9.58E-05 | 0.001846 | 1 |
| ENSG0000 | mucosal h | Inflamed | PRC1-AS1  | antisense  | chr15 | 91509575 | 91531854 | + | 1799  | 13.88305 | 0.078759 | 0.876239 | 0.215477 | 4.066508 | 9.59E-05 | 0.001847 | 1 |
| ENSG0000 | mucosal h | Inflamed | AGTRAP    | protein_cc | chr1  | 11796141 | 11814859 | + | 2433  | 867.494  | 0        | -0.6102  | 0.150077 | -4.06594 | 9.61E-05 | 0.001849 | 1 |
| ENSG0000 | mucosal h | Inflamed | RP11-22C1 | antisense  | chr8  | 95649513 | 95651695 | - | 2183  | 73.17184 | 0.011933 | 0.968637 | 0.238255 | 4.065556 | 9.62E-05 | 0.00185  | 1 |
| ENSG0000 | mucosal h | Inflamed | IL10RA    | protein_cc | chr11 | 1.18E+08 | 1.18E+08 | + | 6546  | 3317.415 | 0        | -0.72771 | 0.179005 | -4.06532 | 9.63E-05 | 0.001851 | 1 |
| ENSG0000 | mucosal h | Inflamed | PLEK      | protein_cc | chr2  | 68592305 | 68624585 | + | 3314  | 3139.597 | 0        | -1.3412  | 0.330023 | -4.06397 | 9.68E-05 | 0.001859 | 1 |
| ENSG0000 | mucosal h | Inflamed | MIR31HG   | sense_ove  | chr9  | 21455641 | 21559668 | - | 745   | 7.799523 | 0.441527 | -1.27643 | 0.314104 | -4.06372 | 9.69E-05 | 0.001859 | 1 |
| ENSG0000 | mucosal h | Inflamed | LILRB3    | protein_cc | chr19 | 54720147 | 54746602 | - | 4096  | 163.0143 | 0.00716  | -1.46349 | 0.360163 | -4.0634  | 9.70E-05 | 0.00186  | 1 |
| ENSG0000 | mucosal h | Inflamed | GPR55     | protein_cc | chr2  | 2.32E+08 | 2.32E+08 | - | 4130  | 194.2959 | 0.002387 | -0.8444  | 0.207824 | -4.06303 | 9.71E-05 | 0.00186  | 1 |
| ENSG0000 | mucosal h | Inflamed | SLC4A4    | protein_cc | chr4  | 72053003 | 72437804 | + | 8361  | 4811.757 | 0        | 1.515975 | 0.373136 | 4.06279  | 9.72E-05 | 0.00186  | 1 |
| ENSG0000 | mucosal h | Inflamed | CTSC      | protein_cc | chr11 | 88026760 | 88070955 | - | 11421 | 7865.368 | 0        | -0.52094 | 0.128223 | -4.06274 | 9.72E-05 | 0.00186  | 1 |
| ENSG0000 | mucosal h | Inflamed | RP11-356J | pseudoger  | chr11 | 1.12E+08 | 1.12E+08 | + | 1166  | 1.357995 | 0.658711 | 0.542052 | 0.133445 | 4.062    | 9.75E-05 | 0.001864 | 1 |
| ENSG0000 | mucosal h | Inflamed | RP11-595E | protein_cc | chr18 | 19668021 | 19678741 | + | 453   | 6.307876 | 0.167064 | 0.816081 | 0.200933 | 4.06146  | 9.77E-05 | 0.001866 | 1 |
| ENSG0000 | mucosal h | Inflamed | CTLA4     | protein_cc | chr2  | 2.05E+08 | 2.05E+08 | + | 2120  | 179.074  | 0.00716  | -1.29727 | 0.319436 | -4.06111 | 9.78E-05 | 0.001867 | 1 |
| ENSG0000 | mucosal h | Inflamed | RMDN2     | protein_cc | chr2  | 38150330 | 38294285 | + | 5999  | 248.5036 | 0        | 0.841014 | 0.20711  | 4.060704 | 9.79E-05 | 0.001869 | 1 |
| ENSG0000 | mucosal h | Inflamed | CLEC5A    | protein_cc | chr7  | 1.42E+08 | 1.42E+08 | - | 4129  | 82.06921 | 0.045346 | -1.83672 | 0.452338 | -4.06051 | 9.80E-05 | 0.001869 | 1 |
| ENSG0000 | mucosal h | Inflamed | D87024.1  | miRNA      | chr22 | 23198720 | 23198813 | + | 94    | 33.58473 | 0.031026 | -1.17391 | 0.289148 | -4.05987 | 9.82E-05 | 0.001872 | 1 |

|          |           |          |                           |               |          |          |          |     |          |          |          |          |          |          |          |          |   |
|----------|-----------|----------|---------------------------|---------------|----------|----------|----------|-----|----------|----------|----------|----------|----------|----------|----------|----------|---|
| ENSG0000 | mucosal h | Inflamed | EIF4EBP2                  | protein_cc    | chr10    | 72164135 | 72188374 | +   | 7257     | 10725.23 | 0        | 0.506546 | 0.124827 | 4.057991 | 9.89E-05 | 0.001882 | 1 |
| ENSG0000 | mucosal h | Inflamed | RP11-708F                 | lincRNA       | chr17    | 47249257 | 47250608 | +   | 1352     | 502.0167 | 0.042959 | 1.967082 | 0.484757 | 4.057877 | 9.90E-05 | 0.001882 | 1 |
| ENSG0000 | mucosal h | Inflamed | GLDC                      | protein_cc    | chr9     | 6532464  | 6645650  | -   | 4656     | 142.7518 | 0        | -0.97072 | 0.239223 | -4.05779 | 9.90E-05 | 0.001882 | 1 |
| ENSG0000 | mucosal h | Inflamed | TMEM236                   | protein_cc    | chr10    | 18041218 | 18089855 | +   | 5465     | 261.3126 | 0.009547 | 1.586096 | 0.390925 | 4.057295 | 9.92E-05 | 0.001884 | 1 |
| ENSG0000 | mucosal h | Inflamed | IL24                      | protein_cc    | chr1     | 2.07E+08 | 2.07E+08 | +   | 1979     | 152.3484 | 0.360382 | -2.76177 | 0.680719 | -4.05714 | 9.92E-05 | 0.001884 | 1 |
| ENSG0000 | mucosal h | Inflamed | SUCLG2                    | protein_cc    | chr3     | 67410884 | 67705038 | -   | 3090     | 4987.007 | 0        | 0.700392 | 0.172684 | 4.055929 | 9.97E-05 | 0.001891 | 1 |
| ENSG0000 | mucosal h | Inflamed | RP11-386M                 | lincRNA       | chr15    | 93138790 | 93139692 | -   | 374      | 5.651551 | 0.303103 | 0.940336 | 0.231879 | 4.055289 | 9.99E-05 | 0.001894 | 1 |
| ENSG0000 | mucosal h | Inflamed | C3orf55                   | protein_cc    | chr3     | 1.57E+08 | 1.57E+08 | +   | 3180     | 16.84964 | 0.057279 | -1.22466 | 0.302113 | -4.05367 | 0.000101 | 0.001904 | 1 |
| ENSG0000 | mucosal h | Inflamed | ZBTB7C                    | protein_cc    | chr18    | 45553044 | 45937123 | -   | 7648     | 3780.327 | 0        | 0.990672 | 0.24443  | 4.052997 | 0.000101 | 0.001907 | 1 |
| ENSG0000 | mucosal h | Inflamed | FMO5                      | protein_cc    | chr1     | 1.47E+08 | 1.47E+08 | -   | 5988     | 1087.513 | 0        | 1.125986 | 0.277907 | 4.051669 | 0.000101 | 0.001913 | 1 |
| ENSG0000 | mucosal h | Inflamed | CLMN                      | protein_cc    | chr14    | 95648277 | 95786243 | -   | 15701    | 5691.217 | 0        | 0.812441 | 0.200521 | 4.051642 | 0.000101 | 0.001913 | 1 |
| ENSG0000 | mucosal h | Inflamed | KDELC1P1                  | pseudoger     | chr5     | 1.27E+08 | 1.27E+08 | +   | 1509     | 1.801909 | 0.546539 | 0.682062 | 0.168343 | 4.051612 | 0.000101 | 0.001913 | 1 |
| ENSG0000 | mucosal h | Inflamed | COL6A3                    | protein_cc    | chr2     | 2.38E+08 | 2.38E+08 | -   | 19624    | 27544.11 | 0        | -1.12082 | 0.276673 | -4.05106 | 0.000101 | 0.001915 | 1 |
| ENSG0000 | mucosal h | Inflamed | MTMR11                    | protein_cc    | chr1     | 1.5E+08  | 1.5E+08  | -   | 4591     | 5468.012 | 0        | 0.869034 | 0.214536 | 4.050764 | 0.000102 | 0.001915 | 1 |
| ENSG0000 | mucosal h | Inflamed | CLEC4A                    | protein_cc    | chr12    | 8276228  | 8291203  | +   | 1281     | 166.3365 | 0        | -0.92542 | 0.228463 | -4.05064 | 0.000102 | 0.001915 | 1 |
| ENSG0000 | mucosal h | Inflamed | CAMK2G                    | protein_cc    | chr10    | 75572259 | 75634343 | -   | 6770     | 2100.377 | 0        | 0.488113 | 0.120509 | 4.050422 | 0.000102 | 0.001915 | 1 |
| ENSG0000 | mucosal h | Inflamed | ST3GAL2                   | protein_cc    | chr16    | 70413338 | 70473140 | -   | 6287     | 1567.964 | 0        | -0.75702 | 0.186918 | -4.05003 | 0.000102 | 0.001917 | 1 |
| ENSG0000 | mucosal h | Inflamed | VAV3                      | protein_cc    | chr1     | 1.08E+08 | 1.09E+08 | -   | 7271     | 1775.506 | 0        | 0.951136 | 0.234872 | 4.049597 | 0.000102 | 0.001918 | 1 |
| ENSG0000 | mucosal h | Inflamed | ADAMTS1                   | protein_cc    | chr5     | 33523640 | 33892297 | -   | 9778     | 399.852  | 0        | -1.32671 | 0.327632 | -4.0494  | 0.000102 | 0.001918 | 1 |
| ENSG0000 | mucosal h | Inflamed | LMTK3                     | protein_cc    | chr19    | 48988528 | 49016446 | -   | 5163     | 118.2029 | 0        | -0.79869 | 0.197297 | -4.04817 | 0.000103 | 0.001926 | 1 |
| ENSG0000 | mucosal h | Inflamed | RP11-134F                 | lincRNA       | chr1     | 2.03E+08 | 2.03E+08 | +   | 837      | 7.548926 | 0.124105 | -0.86516 | 0.213768 | -4.0472  | 0.000103 | 0.001931 | 1 |
| ENSG0000 | mucosal h | Inflamed | CTD-2134                  | lincRNA       | chr14    | 1.04E+08 | 1.04E+08 | -   | 582      | 6.587112 | 0.140811 | 0.727192 | 0.1797   | 4.0467   | 0.000103 | 0.001933 | 1 |
| ENSG0000 | mucosal h | Inflamed | RP11-502I                 | lincRNA       | chr15    | 67833410 | 67834942 | -   | 1533     | 56.8401  | 0        | 0.686705 | 0.169708 | 4.046385 | 0.000103 | 0.001934 | 1 |
| ENSG0000 | mucosal h | Inflamed | FAM101A                   | protein_cc    | chr12    | 1.24E+08 | 1.25E+08 | +   | 2969     | 1472.277 | 0        | 0.942004 | 0.232822 | 4.046026 | 0.000103 | 0.001935 | 1 |
| ENSG0000 | mucosal h | Inflamed | BMP3                      | protein_cc    | chr4     | 81952119 | 81978685 | +   | 5734     | 475.0621 | 0.038186 | 2.368901 | 0.585574 | 4.045436 | 0.000104 | 0.001938 | 1 |
| ENSG0000 | mucosal h | Inflamed | PHLPP1                    | protein_cc    | chr18    | 60382672 | 60647666 | +   | 9153     | 1252.492 | 0        | 0.62228  | 0.153872 | 4.044151 | 0.000104 | 0.001946 | 1 |
| ENSG0000 | mucosal h | Inflamed | GPR132                    | protein_cc    | chr14    | 1.06E+08 | 1.06E+08 | -   | 4198     | 448.9905 | 0        | -0.95767 | 0.236842 | -4.04349 | 0.000104 | 0.001947 | 1 |
| ENSG0000 | mucosal h | Inflamed | RP11-253M                 | sense_intr    | chr15    | 69683531 | 69684488 | +   | 694      | 3.883055 | 0.336516 | 0.698154 | 0.172662 | 4.043473 | 0.000104 | 0.001947 | 1 |
| ENSG0000 | mucosal h | Inflamed | XCR1                      | protein_cc    | chr3     | 46058516 | 46069234 | -   | 5403     | 210.7375 | 0.002387 | -0.99137 | 0.245185 | -4.04336 | 0.000104 | 0.001947 | 1 |
| ENSG0000 | mucosal h | Inflamed | HOXA5                     | protein_cc    | chr7     | 27180671 | 27183287 | -   | 1707     | 479.0883 | 0        | 0.893731 | 0.221114 | 4.041949 | 0.000105 | 0.001956 | 1 |
| ENSG0000 | mucosal h | Inflamed | AP3S2                     | protein_cc    | chr15    | 90373831 | 90437574 | -   | 8146     | 1638.22  | 0        | 0.476534 | 0.117911 | 4.041476 | 0.000105 | 0.001957 | 1 |
| ENSG0000 | mucosal h | Inflamed | CBX2                      | protein_cc    | chr17    | 77751931 | 77761782 | +   | 5687     | 156.8401 | 0        | -0.91684 | 0.22686  | -4.04143 | 0.000105 | 0.001957 | 1 |
| ENSG0000 | mucosal h | Inflamed | ATXN7L1                   | protein_cc    | chr7     | 1.05E+08 | 1.06E+08 | -   | 8295     | 422.4296 | 0        | 0.48602  | 0.120273 | 4.040991 | 0.000105 | 0.001959 | 1 |
| ENSG0000 | mucosal h | Inflamed | CBR3-AS1                  | processed_chr | 21       | 37504065 | 37528615 | -   | 6438     | 182.9189 | 0        | 0.873973 | 0.216316 | 4.040266 | 0.000106 | 0.001963 | 1 |
| ENSG0000 | mucosal h | Inflamed | VAV1                      | protein_cc    | chr19    | 6772725  | 6857377  | +   | 4269     | 1151     | 0        | -0.75516 | 0.186973 | -4.03887 | 0.000106 | 0.001971 | 1 |
| ENSG0000 | mucosal h | Inflamed | POMC                      | protein_cc    | chr2     | 25383722 | 25391772 | -   | 1538     | 37.88067 | 0.00716  | -1.07132 | 0.265269 | -4.03863 | 0.000106 | 0.001972 | 1 |
| ENSG0000 | mucosal h | Inflamed | CCDC147- <i>antisense</i> | chr10         | 1.06E+08 | 1.06E+08 | -        | 795 | 7.178998 | 0.26969  | -1.08653 | 0.269109 | -4.03748 | 0.000107 | 0.001978 | 1        |   |
| ENSG0000 | mucosal h | Inflamed | SLCO4A1                   | protein_cc    | chr20    | 61273797 | 61317137 | +   | 4051     | 1070.208 | 0        | -0.75916 | 0.18811  | -4.03571 | 0.000107 | 0.00199  | 1 |
| ENSG0000 | mucosal h | Inflamed | KLHL6                     | protein_cc    | chr3     | 1.83E+08 | 1.83E+08 | -   | 10546    | 1778.94  | 0        | -1.09424 | 0.271227 | -4.03441 | 0.000108 | 0.001998 | 1 |
| ENSG0000 | mucosal h | Inflamed | RP11-61L1                 | sense_intr    | chr18    | 9506240  | 9509724  | +   | 3485     | 4.785203 | 0.274463 | 0.793233 | 0.196638 | 4.033974 | 0.000108 | 0.002    | 1 |

|          |           |          |           |                  |          |          |   |       |          |          |          |          |          |          |          |   |
|----------|-----------|----------|-----------|------------------|----------|----------|---|-------|----------|----------|----------|----------|----------|----------|----------|---|
| ENSG0000 | mucosal h | Inflamed | REG3A     | protein_cc chr2  | 79384132 | 79386879 | - | 1580  | 6082.527 | 0.016706 | -3.23363 | 0.801728 | -4.03333 | 0.000108 | 0.002003 | 1 |
| ENSG0000 | mucosal h | Inflamed | GUCA2A    | protein_cc chr1  | 42628362 | 42630389 | - | 569   | 10387.05 | 0        | 2.24625  | 0.55703  | 4.032545 | 0.000109 | 0.002007 | 1 |
| ENSG0000 | mucosal h | Inflamed | TCEA3     | protein_cc chr1  | 23707554 | 23751233 | - | 3515  | 3325.205 | 0        | 0.923626 | 0.22905  | 4.032424 | 0.000109 | 0.002007 | 1 |
| ENSG0000 | mucosal h | Inflamed | LINC00479 | lincRNA chr21    | 43131680 | 43135935 | - | 2114  | 4.050119 | 0.4821   | 0.736423 | 0.182633 | 4.03225  | 0.000109 | 0.002007 | 1 |
| ENSG0000 | mucosal h | Inflamed | RP11-321C | lincRNA chr15    | 63682335 | 63729347 | + | 1058  | 62.36277 | 0.052506 | 1.346713 | 0.334063 | 4.03131  | 0.000109 | 0.002012 | 1 |
| ENSG0000 | mucosal h | Inflamed | C19orf10  | protein_cc chr19 | 4641386  | 4670382  | - | 1678  | 3125.907 | 0        | -0.45896 | 0.113862 | -4.03081 | 0.000109 | 0.002013 | 1 |
| ENSG0000 | mucosal h | Inflamed | TEAD4     | protein_cc chr12 | 3068496  | 3149839  | + | 2272  | 426.4821 | 0        | -0.62643 | 0.155413 | -4.03077 | 0.000109 | 0.002013 | 1 |
| ENSG0000 | mucosal h | Inflamed | CASC10    | protein_cc chr10 | 21781587 | 21786191 | - | 3801  | 33.46778 | 0.01432  | -0.95273 | 0.236373 | -4.03062 | 0.000109 | 0.002013 | 1 |
| ENSG0000 | mucosal h | Inflamed | SLC25A23  | protein_cc chr19 | 6436090  | 6465214  | - | 4859  | 6772.198 | 0        | 0.731579 | 0.181521 | 4.030272 | 0.000109 | 0.002014 | 1 |
| ENSG0000 | mucosal h | Inflamed | STARD10   | protein_cc chr11 | 72465774 | 72504726 | - | 3710  | 6853.243 | 0        | 0.765077 | 0.1899   | 4.028844 | 0.00011  | 0.002022 | 1 |
| ENSG0000 | mucosal h | Inflamed | RP1-80N2  | lincRNA chr6     | 6680542  | 6683866  | - | 3325  | 59.87351 | 0.026253 | 1.186972 | 0.294619 | 4.028836 | 0.00011  | 0.002022 | 1 |
| ENSG0000 | mucosal h | Inflamed | PLEKHF1   | protein_cc chr19 | 30155963 | 30166364 | + | 2681  | 354.1551 | 0        | -0.65104 | 0.161647 | -4.02753 | 0.000111 | 0.00203  | 1 |
| ENSG0000 | mucosal h | Inflamed | CMTM2     | protein_cc chr16 | 66613351 | 66622178 | + | 1151  | 37.52745 | 0.136038 | -1.6725  | 0.415313 | -4.02708 | 0.000111 | 0.002032 | 1 |
| ENSG0000 | mucosal h | Inflamed | UCP2      | protein_cc chr11 | 73685712 | 73694352 | - | 3237  | 3640.284 | 0        | -0.70026 | 0.173894 | -4.02694 | 0.000111 | 0.002032 | 1 |
| ENSG0000 | mucosal h | Inflamed | AP001271  | sense_intr chr11 | 70323382 | 70323697 | - | 206   | 1.954654 | 0.501193 | 0.561909 | 0.139545 | 4.026717 | 0.000111 | 0.002032 | 1 |
| ENSG0000 | mucosal h | Inflamed | TGM2      | protein_cc chr20 | 36756863 | 36794980 | - | 6962  | 11936.68 | 0        | -1.06493 | 0.264533 | -4.0257  | 0.000111 | 0.002038 | 1 |
| ENSG0000 | mucosal h | Inflamed | APLN      | protein_cc chrX  | 1.29E+08 | 1.29E+08 | - | 3220  | 93.99523 | 0.011933 | -1.34465 | 0.334097 | -4.02472 | 0.000112 | 0.002044 | 1 |
| ENSG0000 | mucosal h | Inflamed | CADM1     | protein_cc chr11 | 1.15E+08 | 1.15E+08 | - | 11015 | 635.2554 | 0        | -1.06071 | 0.263602 | -4.02391 | 0.000112 | 0.002048 | 1 |
| ENSG0000 | mucosal h | Inflamed | RP11-6771 | antisense chr11  | 1.25E+08 | 1.25E+08 | + | 1538  | 49.36038 | 0        | 0.893282 | 0.222008 | 4.023637 | 0.000112 | 0.002048 | 1 |
| ENSG0000 | mucosal h | Inflamed | MSC       | protein_cc chr8  | 72753784 | 72756703 | - | 2113  | 491.969  | 0        | -1.02808 | 0.255525 | -4.02341 | 0.000112 | 0.002048 | 1 |
| ENSG0000 | mucosal h | Inflamed | USF1      | protein_cc chr1  | 1.61E+08 | 1.61E+08 | - | 2336  | 1874.317 | 0        | -0.33118 | 0.082314 | -4.02337 | 0.000112 | 0.002048 | 1 |
| ENSG0000 | mucosal h | Inflamed | RBP5      | protein_cc chr12 | 7276280  | 7281538  | - | 1369  | 318.2005 | 0        | -1.00514 | 0.249903 | -4.0221  | 0.000113 | 0.002057 | 1 |
| ENSG0000 | mucosal h | Inflamed | PORCN     | protein_cc chrX  | 48367350 | 48379202 | + | 3011  | 267.4033 | 0        | -0.44424 | 0.110471 | -4.02133 | 0.000113 | 0.002061 | 1 |
| ENSG0000 | mucosal h | Inflamed | CARD17    | protein_cc chr11 | 1.05E+08 | 1.05E+08 | - | 466   | 4.582339 | 0.319809 | -0.9076  | 0.22575  | -4.02036 | 0.000114 | 0.002066 | 1 |
| ENSG0000 | mucosal h | Inflamed | CTD-2545  | lincRNA chr19    | 50990067 | 50990895 | - | 626   | 7.434368 | 0.181384 | -0.96231 | 0.23937  | -4.02019 | 0.000114 | 0.002066 | 1 |
| ENSG0000 | mucosal h | Inflamed | ALOX5     | protein_cc chr10 | 45869661 | 45941561 | + | 3685  | 1629.709 | 0        | -0.89154 | 0.22177  | -4.02013 | 0.000114 | 0.002066 | 1 |
| ENSG0000 | mucosal h | Inflamed | C2orf54   | protein_cc chr2  | 2.42E+08 | 2.42E+08 | - | 2772  | 209.0239 | 0.009547 | 1.312193 | 0.326462 | 4.019432 | 0.000114 | 0.002069 | 1 |
| ENSG0000 | mucosal h | Inflamed | IGHV3OR1  | IG_V_pseu chr16  | 33740804 | 33741266 | - | 360   | 2.190931 | 0.622912 | -0.78891 | 0.196282 | -4.01927 | 0.000114 | 0.002069 | 1 |
| ENSG0000 | mucosal h | Inflamed | GAREML    | protein_cc chr2  | 26395960 | 26412532 | + | 5939  | 317.8115 | 0        | 0.692085 | 0.172224 | 4.018525 | 0.000114 | 0.002073 | 1 |
| ENSG0000 | mucosal h | Inflamed | TTYH3     | protein_cc chr7  | 2671585  | 2704436  | + | 6129  | 8049.776 | 0        | -0.65906 | 0.164031 | -4.01789 | 0.000115 | 0.002077 | 1 |
| ENSG0000 | mucosal h | Inflamed | RP11-103J | lincRNA chr20    | 10981952 | 10982411 | + | 460   | 2.319809 | 0.560859 | 0.636261 | 0.158405 | 4.016675 | 0.000115 | 0.002085 | 1 |
| ENSG0000 | mucosal h | Inflamed | IGF2BP2   | protein_cc chr3  | 1.85E+08 | 1.86E+08 | - | 4735  | 1750.119 | 0        | 0.634261 | 0.157931 | 4.016061 | 0.000115 | 0.002088 | 1 |
| ENSG0000 | mucosal h | Inflamed | AC092569  | pseudoger chr2   | 30969310 | 30969567 | - | 258   | 1.692124 | 0.596659 | 0.629891 | 0.156898 | 4.014645 | 0.000116 | 0.002097 | 1 |
| ENSG0000 | mucosal h | Inflamed | LRRC31    | protein_cc chr3  | 1.7E+08  | 1.7E+08  | - | 3113  | 656.4439 | 0.009547 | 1.285931 | 0.320494 | 4.012338 | 0.000117 | 0.002112 | 1 |
| ENSG0000 | mucosal h | Inflamed | PSMB2     | protein_cc chr1  | 36067185 | 36107445 | - | 2701  | 3778.933 | 0        | -0.32167 | 0.080172 | -4.01228 | 0.000117 | 0.002112 | 1 |
| ENSG0000 | mucosal h | Inflamed | CD274     | protein_cc chr9  | 5450503  | 5470566  | + | 4108  | 542.1169 | 0        | -1.27691 | 0.318288 | -4.0118  | 0.000117 | 0.002115 | 1 |
| ENSG0000 | mucosal h | Inflamed | CNKSR3    | protein_cc chr6  | 1.55E+08 | 1.55E+08 | - | 21564 | 912.8568 | 0        | 0.7253   | 0.180801 | 4.011589 | 0.000117 | 0.002115 | 1 |
| ENSG0000 | mucosal h | Inflamed | FICD      | protein_cc chr12 | 1.09E+08 | 1.09E+08 | + | 4267  | 571.0072 | 0        | -0.62572 | 0.15599  | -4.01131 | 0.000117 | 0.002116 | 1 |
| ENSG0000 | mucosal h | Inflamed | NTRK3     | protein_cc chr15 | 88418230 | 88799999 | - | 9078  | 64.02864 | 0.02148  | 1.48698  | 0.370807 | 4.010115 | 0.000118 | 0.002123 | 1 |
| ENSG0000 | mucosal h | Inflamed | MGAT1     | protein_cc chr5  | 1.8E+08  | 1.8E+08  | - | 5817  | 9325.575 | 0        | -0.39901 | 0.099544 | -4.00835 | 0.000119 | 0.002134 | 1 |



|          |           |          |           |            |       |          |          |   |       |          |          |          |          |          |          |          |   |
|----------|-----------|----------|-----------|------------|-------|----------|----------|---|-------|----------|----------|----------|----------|----------|----------|----------|---|
| ENSG0000 | mucosal h | Inflamed | RAB11FIP1 | protein_cc | chr8  | 37716136 | 37756985 | - | 9602  | 10277.99 | 0        | 0.647457 | 0.161528 | 4.008329 | 0.000119 | 0.002134 | 1 |
| ENSG0000 | mucosal h | Inflamed | PRG4      | protein_cc | chr1  | 1.86E+08 | 1.86E+08 | + | 5050  | 6.859189 | 0.348449 | -1.00535 | 0.250878 | -4.00732 | 0.000119 | 0.00214  | 1 |
| ENSG0000 | mucosal h | Inflamed | NOD2      | protein_cc | chr16 | 50727514 | 50766988 | + | 5747  | 341.4081 | 0        | -1.0054  | 0.250899 | -4.00719 | 0.000119 | 0.00214  | 1 |
| ENSG0000 | mucosal h | Inflamed | SNAI3     | protein_cc | chr16 | 88744090 | 88752901 | - | 1732  | 139.6301 | 0        | -0.73343 | 0.183115 | -4.0053  | 0.00012  | 0.002153 | 1 |
| ENSG0000 | mucosal h | Inflamed | HLA-DQB1  | protein_cc | chr6  | 32627244 | 32636160 | - | 4904  | 3107.112 | 0        | -0.78792 | 0.196739 | -4.00487 | 0.00012  | 0.002155 | 1 |
| ENSG0000 | mucosal h | Inflamed | RP11-404F | antisense  | chr14 | 96725748 | 96734961 | - | 738   | 1.427208 | 0.696897 | 0.483835 | 0.120839 | 4.003958 | 0.000121 | 0.002161 | 1 |
| ENSG0000 | mucosal h | Inflamed | RP11-395F | antisense  | chr9  | 1.31E+08 | 1.31E+08 | - | 745   | 350.1862 | 0        | 0.849195 | 0.212114 | 4.003478 | 0.000121 | 0.002163 | 1 |
| ENSG0000 | mucosal h | Inflamed | AC011526  | lincRNA    | chr19 | 41960074 | 42006559 | - | 3884  | 110.2959 | 0.002387 | -1.00528 | 0.251117 | -4.00322 | 0.000121 | 0.002164 | 1 |
| ENSG0000 | mucosal h | Inflamed | RP5-1092f | antisense  | chr1  | 3575502  | 3585336  | - | 754   | 2.047733 | 0.52506  | -0.60284 | 0.150619 | -4.00241 | 0.000121 | 0.002168 | 1 |
| ENSG0000 | mucosal h | Inflamed | RP11-575f | antisense  | chr10 | 20359734 | 20380713 | - | 499   | 4.906921 | 0.322196 | 0.848316 | 0.211955 | 4.002344 | 0.000121 | 0.002168 | 1 |
| ENSG0000 | mucosal h | Inflamed | PLXNA2    | protein_cc | chr1  | 2.08E+08 | 2.08E+08 | - | 13781 | 5104.742 | 0        | 0.748468 | 0.187031 | 4.001836 | 0.000121 | 0.00217  | 1 |
| ENSG0000 | mucosal h | Inflamed | ADAM8     | protein_cc | chr10 | 1.35E+08 | 1.35E+08 | - | 4780  | 1523.549 | 0        | -1.12864 | 0.282057 | -4.00147 | 0.000122 | 0.002171 | 1 |
| ENSG0000 | mucosal h | Inflamed | DKFZP434l | protein_cc | chr9  | 98534605 | 98537013 | + | 2409  | 10.97613 | 0.095465 | 0.986079 | 0.246432 | 4.001432 | 0.000122 | 0.002171 | 1 |
| ENSG0000 | mucosal h | Inflamed | MPND      | protein_cc | chr19 | 4343524  | 4360083  | + | 2049  | 1664.876 | 0        | 0.470399 | 0.117563 | 4.001254 | 0.000122 | 0.002171 | 1 |
| ENSG0000 | mucosal h | Inflamed | RETNLB    | protein_cc | chr3  | 1.08E+08 | 1.08E+08 | - | 1106  | 1189.601 | 0.009547 | 1.836823 | 0.4591   | 4.000922 | 0.000122 | 0.002172 | 1 |
| ENSG0000 | mucosal h | Inflamed | RP11-680f | antisense  | chr12 | 53692449 | 53694098 | - | 637   | 7.811456 | 0.150358 | -1.00215 | 0.250526 | -4.00017 | 0.000122 | 0.002176 | 1 |
| ENSG0000 | mucosal h | Inflamed | RP11-65J3 | lincRNA    | chr9  | 1.32E+08 | 1.32E+08 | + | 1594  | 52.17661 | 0        | -0.92078 | 0.230256 | -3.99895 | 0.000123 | 0.002184 | 1 |
| ENSG0000 | mucosal h | Inflamed | MACROD1   | protein_cc | chr11 | 63766030 | 63933578 | - | 2089  | 451.1169 | 0        | 0.591869 | 0.148054 | 3.997646 | 0.000123 | 0.00219  | 1 |
| ENSG0000 | mucosal h | Inflamed | SFTA2     | protein_cc | chr6  | 30899130 | 30899952 | - | 691   | 3.868735 | 0.575179 | -0.9937  | 0.248575 | -3.99759 | 0.000123 | 0.00219  | 1 |
| ENSG0000 | mucosal h | Inflamed | RP11-75C5 | lincRNA    | chr9  | 8858130  | 8862255  | + | 2494  | 40.19093 | 0.002387 | 0.828522 | 0.207257 | 3.997563 | 0.000123 | 0.00219  | 1 |
| ENSG0000 | mucosal h | Inflamed | RP11-91J1 | lincRNA    | chr8  | 424455   | 427966   | + | 3512  | 184.0621 | 0.004773 | 0.921559 | 0.230532 | 3.997528 | 0.000123 | 0.00219  | 1 |
| ENSG0000 | mucosal h | Inflamed | WNK4      | protein_cc | chr17 | 40932696 | 40948954 | + | 5089  | 2131.1   | 0        | 1.341598 | 0.335672 | 3.996751 | 0.000124 | 0.002194 | 1 |
| ENSG0000 | mucosal h | Inflamed | DYSF      | protein_cc | chr2  | 71680852 | 71913898 | + | 8386  | 1916.869 | 0        | -1.19502 | 0.299023 | -3.9964  | 0.000124 | 0.002196 | 1 |
| ENSG0000 | mucosal h | Inflamed | AC147651  | antisense  | chr7  | 642822   | 648119   | + | 731   | 42.93317 | 0.004773 | -1.02237 | 0.255845 | -3.99607 | 0.000124 | 0.002197 | 1 |
| ENSG0000 | mucosal h | Inflamed | SERPINB3  | protein_cc | chr18 | 61322431 | 61329197 | - | 1777  | 137.5728 | 0.46778  | -2.84042 | 0.710897 | -3.99554 | 0.000124 | 0.0022   | 1 |
| ENSG0000 | mucosal h | Inflamed | CTC-378H  | antisense  | chr19 | 42656721 | 42661675 | + | 1955  | 22.49403 | 0.026253 | -0.98465 | 0.246499 | -3.99453 | 0.000125 | 0.002206 | 1 |
| ENSG0000 | mucosal h | Inflamed | RP11-634E | antisense  | chr1  | 2.48E+08 | 2.48E+08 | + | 1882  | 2.529833 | 0.53222  | 0.591431 | 0.148081 | 3.993968 | 0.000125 | 0.002209 | 1 |
| ENSG0000 | mucosal h | Inflamed | TMEM156   | protein_cc | chr4  | 38968365 | 39034542 | - | 2562  | 151.0597 | 0        | -1.05103 | 0.2632   | -3.99329 | 0.000125 | 0.002213 | 1 |
| ENSG0000 | mucosal h | Inflamed | FUT7      | protein_cc | chr9  | 1.4E+08  | 1.4E+08  | - | 2584  | 85.6611  | 0.009547 | -1.34534 | 0.337022 | -3.99183 | 0.000126 | 0.002223 | 1 |
| ENSG0000 | mucosal h | Inflamed | RHOG      | protein_cc | chr11 | 3848208  | 3862213  | - | 1782  | 3598.527 | 0        | -0.42921 | 0.107545 | -3.99099 | 0.000126 | 0.002229 | 1 |
| ENSG0000 | mucosal h | Inflamed | U91328.22 | lincRNA    | chr6  | 26013469 | 26013985 | + | 517   | 3.761337 | 0.341289 | 0.711433 | 0.178272 | 3.990707 | 0.000126 | 0.002229 | 1 |
| ENSG0000 | mucosal h | Inflamed | AC009061  | pseudoger  | chr16 | 67466595 | 67468931 | + | 2334  | 1357.131 | 0.016706 | 1.807391 | 0.452906 | 3.990654 | 0.000126 | 0.002229 | 1 |
| ENSG0000 | mucosal h | Inflamed | AC002331  | lincRNA    | chr16 | 26596076 | 26606134 | - | 294   | 2.811456 | 0.5179   | -0.76371 | 0.191436 | -3.98936 | 0.000127 | 0.002238 | 1 |
| ENSG0000 | mucosal h | Inflamed | MPST      | protein_cc | chr22 | 37415676 | 37425863 | + | 6760  | 6021.069 | 0        | 0.517954 | 0.129858 | 3.988614 | 0.000127 | 0.002241 | 1 |
| ENSG0000 | mucosal h | Inflamed | ABCB1     | protein_cc | chr7  | 87133175 | 87342611 | - | 5552  | 1687.248 | 0        | 1.342324 | 0.336566 | 3.988298 | 0.000128 | 0.002241 | 1 |
| ENSG0000 | mucosal h | Inflamed | RP11-513M | antisense  | chr9  | 19375449 | 19375994 | + | 546   | 21.08115 | 0.019093 | 0.758625 | 0.190218 | 3.988182 | 0.000128 | 0.002241 | 1 |
| ENSG0000 | mucosal h | Inflamed | RP11-170L | pseudoger  | chr16 | 31973384 | 31985682 | + | 513   | 3.918854 | 0.420048 | -0.78588 | 0.197054 | -3.98815 | 0.000128 | 0.002241 | 1 |
| ENSG0000 | mucosal h | Inflamed | VWFP1     | pseudoger  | chr22 | 17170993 | 17185367 | - | 2907  | 43.98329 | 0.107399 | -1.24416 | 0.312026 | -3.98736 | 0.000128 | 0.002246 | 1 |
| ENSG0000 | mucosal h | Inflamed | SAA4      | protein_cc | chr11 | 18252896 | 18258440 | - | 727   | 8.847255 | 0.463007 | -1.35329 | 0.339406 | -3.98724 | 0.000128 | 0.002246 | 1 |
| ENSG0000 | mucosal h | Inflamed | RP4-798A1 | pseudoger  | chr1  | 1.71E+08 | 1.71E+08 | + | 232   | 6.732697 | 0.202864 | 0.805889 | 0.20214  | 3.986786 | 0.000128 | 0.002248 | 1 |

|          |           |          |           |                  |          |          |   |       |          |          |          |          |          |          |          |   |
|----------|-----------|----------|-----------|------------------|----------|----------|---|-------|----------|----------|----------|----------|----------|----------|----------|---|
| ENSG0000 | mucosal h | Inflamed | ZDHHC23   | protein_cc chr3  | 1.14E+08 | 1.14E+08 | + | 7138  | 1170.47  | 0        | 0.965024 | 0.242171 | 3.984891 | 0.000129 | 0.002262 | 1 |
| ENSG0000 | mucosal h | Inflamed | FMO3      | protein_cc chr1  | 1.71E+08 | 1.71E+08 | + | 3463  | 39.94749 | 0.026253 | -1.11763 | 0.280482 | -3.98466 | 0.000129 | 0.002262 | 1 |
| ENSG0000 | mucosal h | Inflamed | GPR137B   | protein_cc chr1  | 2.36E+08 | 2.36E+08 | + | 2279  | 833.7494 | 0        | -0.57269 | 0.14379  | -3.98281 | 0.00013  | 0.002275 | 1 |
| ENSG0000 | mucosal h | Inflamed | TM4SF5    | protein_cc chr17 | 4675179  | 4686506  | + | 930   | 289.5585 | 0.004773 | 1.150699 | 0.288921 | 3.982742 | 0.00013  | 0.002275 | 1 |
| ENSG0000 | mucosal h | Inflamed | PLEKHG3   | protein_cc chr14 | 65170820 | 65213610 | + | 8555  | 3062.153 | 0        | 0.600712 | 0.150877 | 3.981473 | 0.000131 | 0.002284 | 1 |
| ENSG0000 | mucosal h | Inflamed | CST6      | protein_cc chr11 | 65779312 | 65780976 | + | 759   | 4.28401  | 0.357995 | -1.00409 | 0.252208 | -3.98119 | 0.000131 | 0.002284 | 1 |
| ENSG0000 | mucosal h | Inflamed | TLN2      | protein_cc chr15 | 62682725 | 63136830 | + | 16202 | 3527.637 | 0        | 0.66207  | 0.166302 | 3.981125 | 0.000131 | 0.002284 | 1 |
| ENSG0000 | mucosal h | Inflamed | AC053503  | antisense chr2   | 2.2E+08  | 2.2E+08  | + | 1598  | 12.46062 | 0.069212 | 0.886535 | 0.222717 | 3.980541 | 0.000131 | 0.002287 | 1 |
| ENSG0000 | mucosal h | Inflamed | RP11-480I | pseudoger chr1   | 2.03E+08 | 2.03E+08 | - | 2958  | 81.2673  | 0.002387 | 0.821673 | 0.206451 | 3.979993 | 0.000131 | 0.00229  | 1 |
| ENSG0000 | mucosal h | Inflamed | UBTD1     | protein_cc chr10 | 99258625 | 99330966 | + | 1706  | 238.5704 | 0        | -0.84284 | 0.211877 | -3.97798 | 0.000132 | 0.002306 | 1 |
| ENSG0000 | mucosal h | Inflamed | AC002511  | lincRNA chr19    | 35923859 | 35925544 | - | 1000  | 62.52267 | 0.009547 | 0.963452 | 0.242292 | 3.976409 | 0.000133 | 0.002316 | 1 |
| ENSG0000 | mucosal h | Inflamed | PLAU      | protein_cc chr10 | 75668935 | 75677255 | + | 2950  | 4807.981 | 0        | -1.23432 | 0.310413 | -3.97639 | 0.000133 | 0.002316 | 1 |
| ENSG0000 | mucosal h | Inflamed | CTC-297N  | antisense chr17  | 10633094 | 10718481 | + | 2102  | 66.49403 | 0        | 0.673053 | 0.169289 | 3.975756 | 0.000133 | 0.002319 | 1 |
| ENSG0000 | mucosal h | Inflamed | ADM2      | protein_cc chr22 | 50919985 | 50924869 | + | 4276  | 620.8401 | 0        | -0.57888 | 0.145606 | -3.9757  | 0.000134 | 0.002319 | 1 |
| ENSG0000 | mucosal h | Inflamed | RP11-582J | antisense chr8   | 22398358 | 22402918 | - | 4076  | 8.198091 | 0.176611 | 0.973764 | 0.24499  | 3.97471  | 0.000134 | 0.002325 | 1 |
| ENSG0000 | mucosal h | Inflamed | IGHV3-64  | IG_V_gene chr14  | 1.07E+08 | 1.07E+08 | - | 431   | 882.9284 | 0.002387 | -1.62883 | 0.410026 | -3.9725  | 0.000135 | 0.002342 | 1 |
| ENSG0000 | mucosal h | Inflamed | ZNF57     | protein_cc chr19 | 2900896  | 2918474  | + | 2258  | 285.1122 | 0        | 0.760963 | 0.191565 | 3.972355 | 0.000135 | 0.002342 | 1 |
| ENSG0000 | mucosal h | Inflamed | SPAG16    | protein_cc chr2  | 2.14E+08 | 2.15E+08 | + | 8335  | 281.0191 | 0        | 0.579159 | 0.145811 | 3.97199  | 0.000135 | 0.002343 | 1 |
| ENSG0000 | mucosal h | Inflamed | SIRPB2    | protein_cc chr20 | 1451386  | 1472233  | - | 5199  | 250.2411 | 0.002387 | -0.96783 | 0.243672 | -3.97186 | 0.000135 | 0.002343 | 1 |
| ENSG0000 | mucosal h | Inflamed | CHRM1     | protein_cc chr11 | 62676151 | 62689279 | - | 3250  | 105.611  | 0.009547 | 1.225959 | 0.308692 | 3.971469 | 0.000136 | 0.002345 | 1 |
| ENSG0000 | mucosal h | Inflamed | RP4-794H  | lincRNA chr1     | 59486059 | 59510286 | + | 747   | 9.188544 | 0.038186 | -0.73876 | 0.186039 | -3.97098 | 0.000136 | 0.002348 | 1 |
| ENSG0000 | mucosal h | Inflamed | RP11-357C | processed_chrx   | 62563106 | 62780951 | - | 6379  | 911.5537 | 0        | 0.458997 | 0.115669 | 3.968188 | 0.000137 | 0.002369 | 1 |
| ENSG0000 | mucosal h | Inflamed | SIGLEC9   | protein_cc chr19 | 51628165 | 51639908 | + | 2539  | 230.0048 | 0        | -0.94614 | 0.238435 | -3.96812 | 0.000137 | 0.002369 | 1 |
| ENSG0000 | mucosal h | Inflamed | RP11-4712 | lincRNA chr14    | 62023031 | 62037371 | - | 5148  | 22.73747 | 0.112172 | -1.25421 | 0.316225 | -3.96619 | 0.000138 | 0.002384 | 1 |
| ENSG0000 | mucosal h | Inflamed | CHDH      | protein_cc chr3  | 53846362 | 53880417 | - | 7758  | 1929.957 | 0        | 0.813841 | 0.205204 | 3.966013 | 0.000138 | 0.002384 | 1 |
| ENSG0000 | mucosal h | Inflamed | SUSD3     | protein_cc chr9  | 95820989 | 95847420 | + | 1244  | 222.0072 | 0        | -0.8451  | 0.213107 | -3.96563 | 0.000138 | 0.002386 | 1 |
| ENSG0000 | mucosal h | Inflamed | RP11-500C | antisense chr10  | 1.24E+08 | 1.24E+08 | + | 951   | 14.41766 | 0.026253 | 0.718921 | 0.181318 | 3.964969 | 0.000139 | 0.00239  | 1 |
| ENSG0000 | mucosal h | Inflamed | C4BPB     | protein_cc chr1  | 2.07E+08 | 2.07E+08 | + | 3219  | 772.3317 | 0.002387 | -1.65559 | 0.417605 | -3.96449 | 0.000139 | 0.002392 | 1 |
| ENSG0000 | mucosal h | Inflamed | RP11-379E | lincRNA chr3     | 1.26E+08 | 1.26E+08 | - | 4198  | 109.2387 | 0.002387 | 0.922232 | 0.232695 | 3.963264 | 0.00014  | 0.002401 | 1 |
| ENSG0000 | mucosal h | Inflamed | TRABD2A   | protein_cc chr2  | 85048774 | 85134132 | - | 8771  | 2907.926 | 0        | 1.043756 | 0.263372 | 3.96305  | 0.00014  | 0.002402 | 1 |
| ENSG0000 | mucosal h | Inflamed | CDKL1     | protein_cc chr14 | 50796310 | 50883179 | - | 5961  | 209.1313 | 0.002387 | 0.793758 | 0.2003   | 3.962848 | 0.00014  | 0.002402 | 1 |
| ENSG0000 | mucosal h | Inflamed | CNTFR     | protein_cc chr9  | 34551430 | 34590121 | - | 2094  | 325.2816 | 0.023866 | 1.771729 | 0.447352 | 3.96048  | 0.000141 | 0.002421 | 1 |
| ENSG0000 | mucosal h | Inflamed | MYH7B     | protein_cc chr20 | 33563206 | 33590240 | + | 7929  | 46.62291 | 0.023866 | 0.739055 | 0.186653 | 3.959507 | 0.000142 | 0.002428 | 1 |
| ENSG0000 | mucosal h | Inflamed | SLC2A10   | protein_cc chr20 | 45338126 | 45364965 | + | 4822  | 1105.831 | 0        | 0.546402 | 0.13804  | 3.958279 | 0.000142 | 0.002437 | 1 |
| ENSG0000 | mucosal h | Inflamed | GRB7      | protein_cc chr17 | 37894180 | 37903544 | + | 3597  | 762.7733 | 0        | 0.809471 | 0.204636 | 3.955659 | 0.000144 | 0.002459 | 1 |
| ENSG0000 | mucosal h | Inflamed | RP5-857K2 | pseudoger chr1   | 569756   | 570302   | + | 547   | 5465.215 | 0        | 0.716116 | 0.181044 | 3.955484 | 0.000144 | 0.002459 | 1 |
| ENSG0000 | mucosal h | Inflamed | IYD       | protein_cc chr6  | 1.51E+08 | 1.51E+08 | + | 10362 | 811.1957 | 0.004773 | 1.241915 | 0.314062 | 3.954362 | 0.000144 | 0.002467 | 1 |
| ENSG0000 | mucosal h | Inflamed | FHDC1     | protein_cc chr4  | 1.54E+08 | 1.54E+08 | + | 6593  | 1347.84  | 0        | 0.718056 | 0.181605 | 3.953939 | 0.000144 | 0.002468 | 1 |
| ENSG0000 | mucosal h | Inflamed | GAL       | protein_cc chr11 | 68451247 | 68458643 | + | 1300  | 51.22673 | 0.038186 | -1.35089 | 0.341661 | -3.95387 | 0.000144 | 0.002468 | 1 |
| ENSG0000 | mucosal h | Inflamed | MNX1      | protein_cc chr7  | 1.57E+08 | 1.57E+08 | - | 4202  | 359.5585 | 0.004773 | 1.047353 | 0.264931 | 3.953306 | 0.000145 | 0.00247  | 1 |

|          |           |          |           |            |       |          |          |   |      |          |          |          |          |          |          |          |   |
|----------|-----------|----------|-----------|------------|-------|----------|----------|---|------|----------|----------|----------|----------|----------|----------|----------|---|
| ENSG0000 | mucosal h | Inflamed | Z98881.1  | pseudoger  | chr16 | 653555   | 653904   | + | 348  | 6.312649 | 0.181384 | 0.7407   | 0.187372 | 3.953103 | 0.000145 | 0.00247  | 1 |
| ENSG0000 | mucosal h | Inflamed | PRKCDBP   | protein_cc | chr11 | 6340176  | 6341877  | - | 1672 | 674.7876 | 0        | -1.02855 | 0.26019  | -3.95309 | 0.000145 | 0.00247  | 1 |
| ENSG0000 | mucosal h | Inflamed | RP11-789C | lincRNA    | chr4  | 1.71E+08 | 1.71E+08 | + | 429  | 4.563246 | 0.501193 | 0.811405 | 0.205271 | 3.952858 | 0.000145 | 0.002471 | 1 |
| ENSG0000 | mucosal h | Inflamed | GZMH      | protein_cc | chr14 | 25075686 | 25078905 | - | 951  | 64.67542 | 0.002387 | -0.86137 | 0.21796  | -3.95195 | 0.000145 | 0.002477 | 1 |
| ENSG0000 | mucosal h | Inflamed | LOXL2     | protein_cc | chr8  | 23154702 | 23282841 | - | 5707 | 3418.432 | 0        | -1.0479  | 0.265183 | -3.95162 | 0.000146 | 0.002478 | 1 |
| ENSG0000 | mucosal h | Inflamed | OR4C6     | protein_cc | chr11 | 55432614 | 55433671 | + | 1058 | 2.038186 | 0.606205 | -0.76376 | 0.193301 | -3.95114 | 0.000146 | 0.002481 | 1 |
| ENSG0000 | mucosal h | Inflamed | ARHGAP9   | protein_cc | chr12 | 57866038 | 57882597 | - | 5127 | 1455.654 | 0        | -0.84604 | 0.214157 | -3.95054 | 0.000146 | 0.002485 | 1 |
| ENSG0000 | mucosal h | Inflamed | CCL3      | protein_cc | chr17 | 34415602 | 34417515 | - | 1494 | 408.074  | 0        | -1.57083 | 0.397664 | -3.95013 | 0.000146 | 0.002487 | 1 |
| ENSG0000 | mucosal h | Inflamed | ATP13A4   | protein_cc | chr3  | 1.93E+08 | 1.93E+08 | - | 6013 | 153.5704 | 0.00716  | 1.275329 | 0.322901 | 3.949604 | 0.000147 | 0.00249  | 1 |
| ENSG0000 | mucosal h | Inflamed | TSPAN7    | protein_cc | chrX  | 38420623 | 38548169 | + | 3105 | 1792.566 | 0        | 0.700461 | 0.177367 | 3.949229 | 0.000147 | 0.002492 | 1 |
| ENSG0000 | mucosal h | Inflamed | WDR45     | protein_cc | chrX  | 48929385 | 48958108 | - | 4981 | 1198.661 | 0        | -0.3715  | 0.094076 | -3.94896 | 0.000147 | 0.002493 | 1 |
| ENSG0000 | mucosal h | Inflamed | KLK15     | protein_cc | chr19 | 51328545 | 51340469 | - | 2289 | 221.9857 | 0.011933 | 1.780791 | 0.451118 | 3.947507 | 0.000148 | 0.002504 | 1 |
| ENSG0000 | mucosal h | Inflamed | RP11-175F | antisense  | chr12 | 1.01E+08 | 1.01E+08 | + | 418  | 4.673031 | 0.193317 | 0.701435 | 0.177706 | 3.947177 | 0.000148 | 0.002505 | 1 |
| ENSG0000 | mucosal h | Inflamed | C4B       | protein_cc | chr6  | 31982539 | 32003195 | + | 7116 | 808.6158 | 0.002387 | -1.34733 | 0.34136  | -3.94694 | 0.000148 | 0.002505 | 1 |
| ENSG0000 | mucosal h | Inflamed | RP11-164F | antisense  | chr4  | 1.53E+08 | 1.53E+08 | + | 2565 | 11.26969 | 0.167064 | 1.090547 | 0.276334 | 3.946483 | 0.000148 | 0.002505 | 1 |
| ENSG0000 | mucosal h | Inflamed | GGT5      | protein_cc | chr22 | 24615622 | 24641110 | - | 2590 | 1512.523 | 0        | -0.95541 | 0.242094 | -3.94645 | 0.000148 | 0.002505 | 1 |
| ENSG0000 | mucosal h | Inflamed | IGHV1-2   | IG_V_gene  | chr14 | 1.06E+08 | 1.06E+08 | - | 415  | 10960.87 | 0        | -1.49195 | 0.378059 | -3.94635 | 0.000148 | 0.002505 | 1 |
| ENSG0000 | mucosal h | Inflamed | MAGEH1    | protein_cc | chrX  | 55478538 | 55479998 | + | 1461 | 347.2172 | 0        | -0.69353 | 0.175741 | -3.94633 | 0.000148 | 0.002505 | 1 |
| ENSG0000 | mucosal h | Inflamed | ELL3      | protein_cc | chr15 | 44064798 | 44069741 | - | 2880 | 59.11695 | 0.009547 | 0.939063 | 0.237968 | 3.946176 | 0.000149 | 0.002505 | 1 |
| ENSG0000 | mucosal h | Inflamed | MAFG-AS1  | antisense  | chr17 | 79885705 | 79888629 | + | 1895 | 58.34368 | 0.002387 | -0.62689 | 0.15889  | -3.94543 | 0.000149 | 0.00251  | 1 |
| ENSG0000 | mucosal h | Inflamed | LINC00839 | lincRNA    | chr10 | 42970991 | 42990784 | + | 2337 | 56.57995 | 0.01432  | -1.03313 | 0.261905 | -3.94469 | 0.000149 | 0.002515 | 1 |
| ENSG0000 | mucosal h | Inflamed | IGHV1-12  | IG_V_pseu  | chr14 | 1.07E+08 | 1.07E+08 | - | 205  | 28.04773 | 0.150358 | -1.15216 | 0.29222  | -3.94277 | 0.00015  | 0.002531 | 1 |
| ENSG0000 | mucosal h | Inflamed | TMEM80    | protein_cc | chr11 | 695428   | 705028   | + | 4071 | 859.9594 | 0        | 0.416817 | 0.105727 | 3.942391 | 0.000151 | 0.002533 | 1 |
| ENSG0000 | mucosal h | Inflamed | ARL9      | protein_cc | chr4  | 57371509 | 57390614 | + | 1258 | 6.522673 | 0.152745 | -0.83545 | 0.211964 | -3.94148 | 0.000151 | 0.00254  | 1 |
| ENSG0000 | mucosal h | Inflamed | NAPA-AS1  | antisense  | chr19 | 47987539 | 48004854 | + | 1894 | 105.3484 | 0        | -0.64707 | 0.164188 | -3.94103 | 0.000151 | 0.002542 | 1 |
| ENSG0000 | mucosal h | Inflamed | SEC61A1   | protein_cc | chr3  | 1.28E+08 | 1.28E+08 | + | 4697 | 17706.64 | 0        | -0.38303 | 0.097247 | -3.93876 | 0.000153 | 0.002561 | 1 |
| ENSG0000 | mucosal h | Inflamed | CT62      | protein_cc | chr15 | 71402583 | 71407833 | - | 2849 | 0.918854 | 0.761337 | 0.469412 | 0.119193 | 3.938254 | 0.000153 | 0.002563 | 1 |
| ENSG0000 | mucosal h | Inflamed | PSME2     | protein_cc | chr14 | 24612574 | 24616779 | - | 3579 | 5475.58  | 0        | -0.49383 | 0.125395 | -3.93817 | 0.000153 | 0.002563 | 1 |
| ENSG0000 | mucosal h | Inflamed | SLC2A3    | protein_cc | chr12 | 8071826  | 8088871  | - | 6159 | 1661.814 | 0        | -1.27092 | 0.322801 | -3.93716 | 0.000153 | 0.002571 | 1 |
| ENSG0000 | mucosal h | Inflamed | SERPINB7  | protein_cc | chr18 | 61420169 | 61472604 | + | 2596 | 468.926  | 0.281623 | -2.94032 | 0.7469   | -3.93669 | 0.000154 | 0.002572 | 1 |
| ENSG0000 | mucosal h | Inflamed | KCNK10    | protein_cc | chr14 | 88649113 | 88793251 | - | 5592 | 121.031  | 0.004773 | 1.095449 | 0.278268 | 3.936674 | 0.000154 | 0.002572 | 1 |
| ENSG0000 | mucosal h | Inflamed | PCOLCE    | protein_cc | chr7  | 1E+08    | 1E+08    | + | 3532 | 2850.444 | 0        | -0.97633 | 0.24809  | -3.93538 | 0.000154 | 0.002582 | 1 |
| ENSG0000 | mucosal h | Inflamed | CLEC14A   | protein_cc | chr14 | 38723308 | 38725574 | - | 2267 | 649.0573 | 0        | -0.91845 | 0.233388 | -3.93527 | 0.000154 | 0.002582 | 1 |
| ENSG0000 | mucosal h | Inflamed | B4GALT3   | protein_cc | chr1  | 1.61E+08 | 1.61E+08 | - | 3419 | 2035.883 | 0        | -0.30801 | 0.078301 | -3.93367 | 0.000155 | 0.002595 | 1 |
| ENSG0000 | mucosal h | Inflamed | NT5DC4    | protein_cc | chr2  | 1.13E+08 | 1.14E+08 | + | 4225 | 26.53938 | 0.078759 | -1.38534 | 0.352267 | -3.93263 | 0.000156 | 0.002603 | 1 |
| ENSG0000 | mucosal h | Inflamed | AL049840  | protein_cc | chr14 | 1.04E+08 | 1.04E+08 | + | 1543 | 65.50597 | 0.002387 | 0.561781 | 0.142874 | 3.931997 | 0.000156 | 0.002607 | 1 |
| ENSG0000 | mucosal h | Inflamed | ST3GAL1   | protein_cc | chr8  | 1.34E+08 | 1.35E+08 | - | 8730 | 2886.79  | 0        | -0.93342 | 0.237395 | -3.93194 | 0.000156 | 0.002607 | 1 |
| ENSG0000 | mucosal h | Inflamed | RP11-617L | antisense  | chr4  | 38614322 | 38666504 | - | 3101 | 35.06683 | 0.033413 | 1.055713 | 0.268509 | 3.931755 | 0.000156 | 0.002607 | 1 |
| ENSG0000 | mucosal h | Inflamed | ADCY6     | protein_cc | chr12 | 49159975 | 49182820 | - | 8412 | 7082.296 | 0        | 0.693207 | 0.176342 | 3.931038 | 0.000157 | 0.00261  | 1 |
| ENSG0000 | mucosal h | Inflamed | AC226118  | lincRNA    | chr7  | 419325   | 422678   | + | 2146 | 7.169451 | 0.21957  | 0.899251 | 0.228758 | 3.931018 | 0.000157 | 0.00261  | 1 |

|          |           |          |           |            |       |          |          |   |       |          |          |          |          |          |          |          |   |
|----------|-----------|----------|-----------|------------|-------|----------|----------|---|-------|----------|----------|----------|----------|----------|----------|----------|---|
| ENSG0000 | mucosal h | Inflamed | AC012507  | antisense  | chr2  | 2.32E+08 | 2.32E+08 | + | 2265  | 6.677804 | 0.181384 | 0.82996  | 0.211196 | 3.929814 | 0.000158 | 0.00262  | 1 |
| ENSG0000 | mucosal h | Inflamed | AC112721  | lincRNA    | chr2  | 2.38E+08 | 2.38E+08 | - | 541   | 4.224344 | 0.408115 | -0.90427 | 0.230118 | -3.92961 | 0.000158 | 0.00262  | 1 |
| ENSG0000 | mucosal h | Inflamed | TLR8      | protein_cc | chrX  | 12924739 | 12941288 | + | 4353  | 270.7375 | 0        | -1.07138 | 0.272672 | -3.92918 | 0.000158 | 0.002623 | 1 |
| ENSG0000 | mucosal h | Inflamed | SLC17A8   | protein_cc | chr12 | 1.01E+08 | 1.01E+08 | + | 4272  | 43.3747  | 0.126492 | 1.42192  | 0.362016 | 3.927777 | 0.000159 | 0.002634 | 1 |
| ENSG0000 | mucosal h | Inflamed | DEF8      | protein_cc | chr16 | 90014333 | 90034468 | + | 6565  | 2065.862 | 0        | -0.46044 | 0.117237 | -3.92744 | 0.000159 | 0.002634 | 1 |
| ENSG0000 | mucosal h | Inflamed | SSTR1     | protein_cc | chr14 | 38677204 | 38682272 | + | 4295  | 479.673  | 0.004773 | 1.1397   | 0.29019  | 3.927434 | 0.000159 | 0.002634 | 1 |
| ENSG0000 | mucosal h | Inflamed | CCL14     | protein_cc | chr17 | 34310327 | 34329100 | - | 4226  | 169.9021 | 0        | 0.618695 | 0.157538 | 3.927262 | 0.000159 | 0.002634 | 1 |
| ENSG0000 | mucosal h | Inflamed | RP11-3751 | antisense  | chr1  | 1.66E+08 | 1.66E+08 | + | 594   | 4.768496 | 0.24821  | 0.794131 | 0.202225 | 3.926957 | 0.000159 | 0.002635 | 1 |
| ENSG0000 | mucosal h | Inflamed | IGLV3-9   | IG_V_gene  | chr22 | 23161507 | 23162253 | + | 461   | 1270.706 | 0.002387 | -1.6359  | 0.416745 | -3.92543 | 0.00016  | 0.002648 | 1 |
| ENSG0000 | mucosal h | Inflamed | DIO3      | protein_cc | chr14 | 1.02E+08 | 1.02E+08 | + | 2102  | 66.79475 | 0.019093 | 1.354993 | 0.345325 | 3.923824 | 0.000161 | 0.002662 | 1 |
| ENSG0000 | mucosal h | Inflamed | CYP27B1   | protein_cc | chr12 | 58156117 | 58162769 | - | 3440  | 140.6611 | 0        | -0.84022 | 0.214296 | -3.92085 | 0.000163 | 0.002689 | 1 |
| ENSG0000 | mucosal h | Inflamed | RP11-1451 | antisense  | chr1  | 2.26E+08 | 2.26E+08 | + | 1530  | 2.484487 | 0.584726 | -0.83107 | 0.211985 | -3.92044 | 0.000163 | 0.002691 | 1 |
| ENSG0000 | mucosal h | Inflamed | PRR16     | protein_cc | chr5  | 1.2E+08  | 1.2E+08  | + | 2281  | 268.568  | 0        | -0.9161  | 0.2337   | -3.91999 | 0.000163 | 0.002693 | 1 |
| ENSG0000 | mucosal h | Inflamed | RP11-4981 | lincRNA    | chr9  | 1.25E+08 | 1.25E+08 | + | 708   | 31.12172 | 0.011933 | 0.748057 | 0.190835 | 3.919923 | 0.000163 | 0.002693 | 1 |
| ENSG0000 | mucosal h | Inflamed | TPPP2     | protein_cc | chr14 | 21492268 | 21504435 | + | 2475  | 4.73031  | 0.334129 | 0.637055 | 0.162537 | 3.919447 | 0.000164 | 0.002695 | 1 |
| ENSG0000 | mucosal h | Inflamed | EDNRA     | protein_cc | chr4  | 1.48E+08 | 1.48E+08 | + | 4238  | 317.7589 | 0.002387 | -1.12345 | 0.286719 | -3.91831 | 0.000164 | 0.002703 | 1 |
| ENSG0000 | mucosal h | Inflamed | S100A3    | protein_cc | chr1  | 1.54E+08 | 1.54E+08 | - | 955   | 42.53222 | 0.023866 | -1.25782 | 0.321015 | -3.91826 | 0.000164 | 0.002703 | 1 |
| ENSG0000 | mucosal h | Inflamed | AC006042  | pseudoger  | chr7  | 8019943  | 8021859  | + | 1469  | 20.98807 | 0.124105 | -1.36569 | 0.348556 | -3.91813 | 0.000164 | 0.002703 | 1 |
| ENSG0000 | mucosal h | Inflamed | MEFV      | protein_cc | chr16 | 3292028  | 3306627  | - | 4819  | 434.7088 | 0.00716  | -1.40709 | 0.359158 | -3.91773 | 0.000165 | 0.002705 | 1 |
| ENSG0000 | mucosal h | Inflamed | HAAO      | protein_cc | chr2  | 42994229 | 43019733 | - | 2726  | 637.6396 | 0        | 0.74294  | 0.189718 | 3.916017 | 0.000166 | 0.00272  | 1 |
| ENSG0000 | mucosal h | Inflamed | EPHX2     | protein_cc | chr8  | 27348296 | 27403081 | + | 4473  | 2283.286 | 0        | 0.87185  | 0.222684 | 3.915189 | 0.000166 | 0.002727 | 1 |
| ENSG0000 | mucosal h | Inflamed | ENPP2     | protein_cc | chr8  | 1.21E+08 | 1.21E+08 | - | 6729  | 1738.874 | 0        | -0.86216 | 0.220257 | -3.91431 | 0.000167 | 0.002732 | 1 |
| ENSG0000 | mucosal h | Inflamed | SLC3A2    | protein_cc | chr11 | 62623518 | 62656352 | + | 5239  | 3422.721 | 0        | -0.38202 | 0.097597 | -3.91429 | 0.000167 | 0.002732 | 1 |
| ENSG0000 | mucosal h | Inflamed | NFAM1     | protein_cc | chr22 | 42776416 | 42828401 | - | 5817  | 1393.563 | 0        | -0.96406 | 0.246315 | -3.91391 | 0.000167 | 0.002734 | 1 |
| ENSG0000 | mucosal h | Inflamed | KCNA5     | protein_cc | chr12 | 5153085  | 5155949  | + | 2865  | 25.44869 | 0.033413 | -1.093   | 0.279275 | -3.9137  | 0.000167 | 0.002734 | 1 |
| ENSG0000 | mucosal h | Inflamed | RP11-6271 | processed  | chr11 | 1.34E+08 | 1.34E+08 | + | 8255  | 495.0692 | 0.00716  | 1.492265 | 0.381509 | 3.911484 | 0.000168 | 0.002755 | 1 |
| ENSG0000 | mucosal h | Inflamed | SRPX2     | protein_cc | chrX  | 99899215 | 99926296 | + | 2368  | 310.2411 | 0        | -0.89907 | 0.229864 | -3.91129 | 0.000168 | 0.002755 | 1 |
| ENSG0000 | mucosal h | Inflamed | RP11-4161 | antisense  | chr10 | 1.05E+08 | 1.05E+08 | + | 1432  | 17.70883 | 0.050119 | 0.998814 | 0.255403 | 3.91074  | 0.000169 | 0.002758 | 1 |
| ENSG0000 | mucosal h | Inflamed | PAX6      | protein_cc | chr11 | 31806340 | 31839509 | - | 14776 | 22.70167 | 0.054893 | 1.161552 | 0.297147 | 3.90902  | 0.00017  | 0.002774 | 1 |
| ENSG0000 | mucosal h | Inflamed | WDR54     | protein_cc | chr2  | 74648805 | 74652882 | + | 2860  | 199.3556 | 0        | -0.56896 | 0.145576 | -3.90833 | 0.00017  | 0.002779 | 1 |
| ENSG0000 | mucosal h | Inflamed | RP1-29C11 | sense_intr | chr22 | 49965912 | 49969074 | - | 2379  | 15.58234 | 0.076372 | -0.86616 | 0.221668 | -3.90748 | 0.000171 | 0.002784 | 1 |
| ENSG0000 | mucosal h | Inflamed | AC093673  | antisense  | chr7  | 1.43E+08 | 1.43E+08 | - | 648   | 86.76134 | 0        | -0.63928 | 0.163605 | -3.90747 | 0.000171 | 0.002784 | 1 |
| ENSG0000 | mucosal h | Inflamed | ANXA1     | protein_cc | chr9  | 75766673 | 75785309 | + | 4561  | 2694.931 | 0        | -1.08036 | 0.276503 | -3.90721 | 0.000171 | 0.002785 | 1 |
| ENSG0000 | mucosal h | Inflamed | RP11-27N1 | lincRNA    | chr8  | 80680377 | 80715077 | + | 789   | 1.875895 | 0.575179 | 0.566334 | 0.144952 | 3.907052 | 0.000171 | 0.002785 | 1 |
| ENSG0000 | mucosal h | Inflamed | JAKMIP1   | protein_cc | chr4  | 6027926  | 6202318  | - | 3673  | 45.48449 | 0.011933 | -0.91605 | 0.234473 | -3.90684 | 0.000171 | 0.002785 | 1 |
| ENSG0000 | mucosal h | Inflamed | CSTA      | protein_cc | chr3  | 1.22E+08 | 1.22E+08 | + | 1373  | 100.8974 | 0        | -1.03794 | 0.265805 | -3.9049  | 0.000172 | 0.002803 | 1 |
| ENSG0000 | mucosal h | Inflamed | LY6G5C    | protein_cc | chr6  | 31644461 | 31651817 | - | 2621  | 80.45585 | 0        | -0.42028 | 0.10771  | -3.90194 | 0.000174 | 0.002831 | 1 |
| ENSG0000 | mucosal h | Inflamed | TLE2      | protein_cc | chr19 | 2997636  | 3047633  | - | 4038  | 1299.322 | 0        | 0.674342 | 0.172871 | 3.900831 | 0.000175 | 0.00284  | 1 |
| ENSG0000 | mucosal h | Inflamed | APOC1     | protein_cc | chr19 | 45417504 | 45422606 | + | 1231  | 515.2243 | 0        | -0.91508 | 0.234668 | -3.89944 | 0.000176 | 0.002853 | 1 |
| ENSG0000 | mucosal h | Inflamed | IGHE      | IG_C_gene  | chr14 | 1.06E+08 | 1.06E+08 | - | 1543  | 55.26969 | 0.016706 | -1.14242 | 0.29301  | -3.89892 | 0.000176 | 0.002856 | 1 |

|          |           |          |           |            |       |          |          |   |       |          |          |          |          |          |          |          |   |
|----------|-----------|----------|-----------|------------|-------|----------|----------|---|-------|----------|----------|----------|----------|----------|----------|----------|---|
| ENSG0000 | mucosal h | Inflamed | RP11-326l | sense_intr | chr4  | 1.85E+08 | 1.85E+08 | - | 686   | 40.76372 | 0.00716  | -0.79873 | 0.204892 | -3.89831 | 0.000176 | 0.002861 | 1 |
| ENSG0000 | mucosal h | Inflamed | HLA-DOA   | protein_cc | chr6  | 32971955 | 32977389 | - | 4012  | 2056.351 | 0        | -0.67672 | 0.173621 | -3.89769 | 0.000177 | 0.002865 | 1 |
| ENSG0000 | mucosal h | Inflamed | RP11-226L | pseudoger  | chr1  | 1.6E+08  | 1.6E+08  | + | 428   | 1.190931 | 0.775656 | 0.452903 | 0.116201 | 3.897594 | 0.000177 | 0.002865 | 1 |
| ENSG0000 | mucosal h | Inflamed | RP1-239B2 | antisense  | chr11 | 17402196 | 17405078 | + | 2883  | 178.864  | 0        | 0.847345 | 0.21748  | 3.8962   | 0.000178 | 0.002877 | 1 |
| ENSG0000 | mucosal h | Inflamed | TUBB6     | protein_cc | chr18 | 12307668 | 12344319 | + | 4117  | 1371.549 | 0        | -0.82134 | 0.210844 | -3.89547 | 0.000178 | 0.002883 | 1 |
| ENSG0000 | mucosal h | Inflamed | HOPX      | protein_cc | chr4  | 57514155 | 57548065 | - | 7759  | 137.494  | 0        | -0.75432 | 0.193667 | -3.89494 | 0.000179 | 0.002887 | 1 |
| ENSG0000 | mucosal h | Inflamed | MANF      | protein_cc | chr3  | 51422478 | 51426828 | + | 2111  | 2922.42  | 0        | -0.53323 | 0.136982 | -3.89271 | 0.00018  | 0.002908 | 1 |
| ENSG0000 | mucosal h | Inflamed | OR52K3P   | pseudoger  | chr11 | 4496043  | 4497123  | + | 1081  | 8.377088 | 0.322196 | -1.04409 | 0.26828  | -3.89181 | 0.000181 | 0.002915 | 1 |
| ENSG0000 | mucosal h | Inflamed | PEX11A    | protein_cc | chr15 | 90220995 | 90234014 | - | 3171  | 581.4487 | 0        | 0.749645 | 0.192626 | 3.891716 | 0.000181 | 0.002915 | 1 |
| ENSG0000 | mucosal h | Inflamed | ROBO4     | protein_cc | chr11 | 1.25E+08 | 1.25E+08 | - | 7033  | 958.6993 | 0        | -0.97085 | 0.249489 | -3.89137 | 0.000181 | 0.002916 | 1 |
| ENSG0000 | mucosal h | Inflamed | RFTN1     | protein_cc | chr3  | 16355081 | 16555533 | - | 4776  | 2173.263 | 0        | -0.8432  | 0.216714 | -3.89086 | 0.000181 | 0.00292  | 1 |
| ENSG0000 | mucosal h | Inflamed | IGLV3-6   | IG_V_pseu  | chr22 | 23192550 | 23192799 | + | 250   | 6.042959 | 0.274463 | -1.03229 | 0.265349 | -3.89032 | 0.000182 | 0.002924 | 1 |
| ENSG0000 | mucosal h | Inflamed | SAMSN1    | protein_cc | chr21 | 15857549 | 15955723 | - | 3152  | 549.5203 | 0        | -0.97462 | 0.250548 | -3.88993 | 0.000182 | 0.002926 | 1 |
| ENSG0000 | mucosal h | Inflamed | IL36RN    | protein_cc | chr2  | 1.14E+08 | 1.14E+08 | + | 3299  | 5.300716 | 0.577566 | -1.16805 | 0.300311 | -3.88946 | 0.000182 | 0.002929 | 1 |
| ENSG0000 | mucosal h | Inflamed | TMEM8B    | protein_cc | chr9  | 35814448 | 35854844 | + | 5426  | 861.3126 | 0        | 0.572638 | 0.147264 | 3.888498 | 0.000183 | 0.002938 | 1 |
| ENSG0000 | mucosal h | Inflamed | APOC2     | protein_cc | chr19 | 45449243 | 45452822 | + | 1312  | 20.6611  | 0.040573 | -0.84101 | 0.21631  | -3.88796 | 0.000183 | 0.002941 | 1 |
| ENSG0000 | mucosal h | Inflamed | NDUFA6-A  | processed  | chr22 | 42486935 | 42535286 | + | 6653  | 176.685  | 0        | 0.449956 | 0.115828 | 3.884677 | 0.000185 | 0.002974 | 1 |
| ENSG0000 | mucosal h | Inflamed | BCAT2     | protein_cc | chr19 | 49298319 | 49314286 | - | 4553  | 1359.274 | 0        | 0.475425 | 0.122396 | 3.884325 | 0.000185 | 0.002976 | 1 |
| ENSG0000 | mucosal h | Inflamed | CDH22     | protein_cc | chr20 | 44802372 | 44937137 | - | 4929  | 14.4463  | 0.102625 | 1.154711 | 0.297318 | 3.883752 | 0.000186 | 0.00298  | 1 |
| ENSG0000 | mucosal h | Inflamed | GNAI2     | protein_cc | chr3  | 50263724 | 50296787 | + | 7650  | 9413.78  | 0        | -0.63413 | 0.163305 | -3.88313 | 0.000186 | 0.002985 | 1 |
| ENSG0000 | mucosal h | Inflamed | SNN       | protein_cc | chr16 | 11762270 | 11773015 | + | 3312  | 995.8496 | 0        | -0.65863 | 0.169643 | -3.88247 | 0.000187 | 0.00299  | 1 |
| ENSG0000 | mucosal h | Inflamed | C17orf62  | protein_cc | chr17 | 80400465 | 80408705 | - | 7234  | 4668.866 | 0        | -0.49715 | 0.128067 | -3.88199 | 0.000187 | 0.002992 | 1 |
| ENSG0000 | mucosal h | Inflamed | TYROBP    | protein_cc | chr19 | 36395303 | 36399197 | - | 907   | 1692.654 | 0        | -0.82458 | 0.212414 | -3.88196 | 0.000187 | 0.002992 | 1 |
| ENSG0000 | mucosal h | Inflamed | PPM1L     | protein_cc | chr3  | 1.6E+08  | 1.61E+08 | + | 12447 | 567.8401 | 0        | 0.71889  | 0.185262 | 3.880397 | 0.000188 | 0.003004 | 1 |
| ENSG0000 | mucosal h | Inflamed | NUDT16P   | pseudoger  | chr3  | 1.31E+08 | 1.31E+08 | + | 2312  | 413.8115 | 0        | 0.558613 | 0.143958 | 3.880396 | 0.000188 | 0.003004 | 1 |
| ENSG0000 | mucosal h | Inflamed | RP11-536k | antisense  | chr10 | 5976233  | 5987863  | - | 3912  | 39.68974 | 0        | -0.8242  | 0.212406 | -3.88031 | 0.000188 | 0.003004 | 1 |
| ENSG0000 | mucosal h | Inflamed | FNDC4     | protein_cc | chr2  | 27714750 | 27718112 | - | 1982  | 160.1718 | 0.002387 | -1.09169 | 0.281374 | -3.87986 | 0.000188 | 0.003007 | 1 |
| ENSG0000 | mucosal h | Inflamed | PTGDS     | protein_cc | chr9  | 1.4E+08  | 1.4E+08  | + | 2378  | 3761.22  | 0        | -1.51907 | 0.391655 | -3.87859 | 0.000189 | 0.003019 | 1 |
| ENSG0000 | mucosal h | Inflamed | EMID1     | protein_cc | chr22 | 29601840 | 29655586 | + | 4899  | 1132.637 | 0        | -0.62984 | 0.162448 | -3.87721 | 0.00019  | 0.003032 | 1 |
| ENSG0000 | mucosal h | Inflamed | SPOCD1    | protein_cc | chr1  | 32256023 | 32281652 | - | 7085  | 125.7375 | 0.004773 | -0.93812 | 0.242063 | -3.87553 | 0.000191 | 0.003049 | 1 |
| ENSG0000 | mucosal h | Inflamed | CCR10     | protein_cc | chr17 | 40830907 | 40835935 | - | 2619  | 151.8258 | 0        | -0.98126 | 0.253207 | -3.87531 | 0.000191 | 0.003049 | 1 |
| ENSG0000 | mucosal h | Inflamed | CACNB2    | protein_cc | chr10 | 18429606 | 18830798 | + | 6537  | 256.4415 | 0.002387 | 1.003203 | 0.258905 | 3.874796 | 0.000192 | 0.003053 | 1 |
| ENSG0000 | mucosal h | Inflamed | ULK3      | protein_cc | chr15 | 75128457 | 75135687 | - | 3516  | 2562.227 | 0        | 0.375661 | 0.097001 | 3.872761 | 0.000193 | 0.003073 | 1 |
| ENSG0000 | mucosal h | Inflamed | TPRG1L    | protein_cc | chr1  | 3541566  | 3546691  | + | 2414  | 3689.589 | 0        | 0.371718 | 0.095991 | 3.872446 | 0.000193 | 0.003075 | 1 |
| ENSG0000 | mucosal h | Inflamed | RP11-168F | lincRNA    | chr1  | 3403810  | 3404191  | + | 382   | 11.12172 | 0.114558 | 0.835752 | 0.215836 | 3.87217  | 0.000194 | 0.003076 | 1 |
| ENSG0000 | mucosal h | Inflamed | HTR1B     | protein_cc | chr6  | 78171948 | 78173490 | - | 1543  | 11.53461 | 0.169451 | -0.99468 | 0.256961 | -3.87092 | 0.000195 | 0.003088 | 1 |
| ENSG0000 | mucosal h | Inflamed | LYN       | protein_cc | chr8  | 56792372 | 56923940 | + | 3398  | 3092.625 | 0        | -0.77459 | 0.200155 | -3.86994 | 0.000195 | 0.003097 | 1 |
| ENSG0000 | mucosal h | Inflamed | MB21D1    | protein_cc | chr6  | 74123238 | 74161999 | - | 4155  | 304.0692 | 0.002387 | -0.7016  | 0.181305 | -3.86975 | 0.000195 | 0.003097 | 1 |
| ENSG0000 | mucosal h | Inflamed | IGHV3-71  | IG_V_pseu  | chr14 | 1.07E+08 | 1.07E+08 | - | 359   | 5.260143 | 0.267303 | -0.81666 | 0.211063 | -3.86925 | 0.000196 | 0.003101 | 1 |
| ENSG0000 | mucosal h | Inflamed | RAB40C    | protein_cc | chr16 | 639357   | 679272   | + | 4180  | 1813.069 | 0        | 0.407205 | 0.105253 | 3.868812 | 0.000196 | 0.003104 | 1 |

|          |           |          |            |            |       |          |          |   |       |          |          |          |          |          |          |          |   |
|----------|-----------|----------|------------|------------|-------|----------|----------|---|-------|----------|----------|----------|----------|----------|----------|----------|---|
| ENSG0000 | mucosal h | Inflamed | EMP3       | protein_cc | chr19 | 48824766 | 48833810 | + | 1667  | 1196.217 | 0        | -0.91745 | 0.23719  | -3.86799 | 0.000197 | 0.003111 | 1 |
| ENSG0000 | mucosal h | Inflamed | AL122127   | lincRNA    | chr14 | 1.06E+08 | 1.06E+08 | + | 485   | 14.16706 | 0.066826 | -1.01983 | 0.263697 | -3.86742 | 0.000197 | 0.003115 | 1 |
| ENSG0000 | mucosal h | Inflamed | NCKIPSD    | protein_cc | chr3  | 48701364 | 48723797 | - | 3635  | 1304.399 | 0        | 0.379305 | 0.098086 | 3.867074 | 0.000197 | 0.003117 | 1 |
| ENSG0000 | mucosal h | Inflamed | C1orf216   | protein_cc | chr1  | 36179476 | 36185073 | - | 3629  | 411.2768 | 0.002387 | -0.64327 | 0.166354 | -3.86688 | 0.000197 | 0.003117 | 1 |
| ENSG0000 | mucosal h | Inflamed | SYT12      | protein_cc | chr11 | 66774249 | 66818334 | + | 10830 | 134.222  | 0.019093 | -1.53182 | 0.39615  | -3.86676 | 0.000197 | 0.003117 | 1 |
| ENSG0000 | mucosal h | Inflamed | CYSLTR1    | protein_cc | chrX  | 77526961 | 77583048 | - | 5431  | 152.9117 | 0        | -0.85353 | 0.220765 | -3.86622 | 0.000198 | 0.00312  | 1 |
| ENSG0000 | mucosal h | Inflamed | PKM        | protein_cc | chr15 | 72491370 | 72524164 | - | 8572  | 35795.57 | 0        | -0.44827 | 0.115947 | -3.86615 | 0.000198 | 0.00312  | 1 |
| ENSG0000 | mucosal h | Inflamed | RP11-432I  | lincRNA    | chr16 | 71760878 | 71761895 | + | 1018  | 0.97852  | 0.768496 | 0.404311 | 0.104581 | 3.866003 | 0.000198 | 0.00312  | 1 |
| ENSG0000 | mucosal h | Inflamed | ACOX1      | protein_cc | chr17 | 73937588 | 73975515 | - | 8543  | 5789.78  | 0        | 0.695196 | 0.179865 | 3.865098 | 0.000199 | 0.003128 | 1 |
| ENSG0000 | mucosal h | Inflamed | DAO        | protein_cc | chr12 | 1.09E+08 | 1.09E+08 | + | 3883  | 48.63484 | 0.088305 | 1.31922  | 0.341404 | 3.864098 | 0.000199 | 0.003137 | 1 |
| ENSG0000 | mucosal h | Inflamed | TGFBI      | protein_cc | chr5  | 1.35E+08 | 1.35E+08 | + | 7835  | 12381.6  | 0        | -0.74384 | 0.1926   | -3.86209 | 0.000201 | 0.003158 | 1 |
| ENSG0000 | mucosal h | Inflamed | RP6-201G   | lincRNA    | chrX  | 67233312 | 67234743 | - | 1432  | 4.894988 | 0.243437 | 0.823547 | 0.213258 | 3.861751 | 0.000201 | 0.00316  | 1 |
| ENSG0000 | mucosal h | Inflamed | CTD-2196f  | antisense  | chr16 | 23698370 | 23699665 | - | 473   | 30.36516 | 0.02148  | 0.913562 | 0.23661  | 3.861043 | 0.000201 | 0.003162 | 1 |
| ENSG0000 | mucosal h | Inflamed | CSAG1      | protein_cc | chrX  | 1.52E+08 | 1.52E+08 | + | 1092  | 2.140811 | 0.601432 | -0.74307 | 0.192456 | -3.86097 | 0.000202 | 0.003162 | 1 |
| ENSG0000 | mucosal h | Inflamed | HSD3B7     | protein_cc | chr16 | 30996519 | 31000473 | + | 2504  | 1398.403 | 0        | -0.52657 | 0.136386 | -3.86092 | 0.000202 | 0.003162 | 1 |
| ENSG0000 | mucosal h | Inflamed | IGHV4-4    | IG_V_gene  | chr14 | 1.06E+08 | 1.06E+08 | - | 412   | 2983.057 | 0        | -1.31293 | 0.340058 | -3.86091 | 0.000202 | 0.003162 | 1 |
| ENSG0000 | mucosal h | Inflamed | RP11-124f  | lincRNA    | chr7  | 1504133  | 1507158  | - | 3026  | 132.1193 | 0.009547 | 0.694903 | 0.179994 | 3.860708 | 0.000202 | 0.003162 | 1 |
| ENSG0000 | mucosal h | Inflamed | LINC0087C  | lincRNA    | chr3  | 72200408 | 72223483 | + | 2933  | 13.32458 | 0.090692 | 0.928629 | 0.240581 | 3.859945 | 0.000202 | 0.003169 | 1 |
| ENSG0000 | mucosal h | Inflamed | COL4A1     | protein_cc | chr13 | 1.11E+08 | 1.11E+08 | - | 7877  | 16555.38 | 0        | -1.11864 | 0.289826 | -3.8597  | 0.000202 | 0.003169 | 1 |
| ENSG0000 | mucosal h | Inflamed | LINC00482  | lincRNA    | chr17 | 79277571 | 79283048 | - | 2197  | 167.6134 | 0        | 0.819461 | 0.212324 | 3.859476 | 0.000203 | 0.003169 | 1 |
| ENSG0000 | mucosal h | Inflamed | BCKDK      | protein_cc | chr16 | 31117428 | 31124110 | + | 3871  | 2062.936 | 0        | -0.34257 | 0.088762 | -3.85946 | 0.000203 | 0.003169 | 1 |
| ENSG0000 | mucosal h | Inflamed | XXbac-B13  | lincRNA    | chr22 | 21311380 | 21318967 | + | 684   | 112.9642 | 0        | 0.704391 | 0.182525 | 3.859145 | 0.000203 | 0.00317  | 1 |
| ENSG0000 | mucosal h | Inflamed | SLC38A4    | protein_cc | chr12 | 47158546 | 47226191 | - | 4143  | 176.463  | 0.054893 | 1.542902 | 0.399823 | 3.858965 | 0.000203 | 0.00317  | 1 |
| ENSG0000 | mucosal h | Inflamed | AC011747   | lincRNA    | chr2  | 8699963  | 8723922  | - | 8956  | 115.3986 | 0        | 0.938248 | 0.243158 | 3.858593 | 0.000203 | 0.003171 | 1 |
| ENSG0000 | mucosal h | Inflamed | LAYN       | protein_cc | chr11 | 1.11E+08 | 1.11E+08 | + | 2938  | 153.1002 | 0        | -0.68854 | 0.178443 | -3.85857 | 0.000203 | 0.003171 | 1 |
| ENSG0000 | mucosal h | Inflamed | LCP2       | protein_cc | chr5  | 1.7E+08  | 1.7E+08  | - | 7231  | 2017.652 | 0        | -0.86792 | 0.225065 | -3.85631 | 0.000205 | 0.003195 | 1 |
| ENSG0000 | mucosal h | Inflamed | ASB13      | protein_cc | chr10 | 5680830  | 5708558  | - | 3003  | 1431.06  | 0        | 0.510222 | 0.132356 | 3.854917 | 0.000206 | 0.003209 | 1 |
| ENSG0000 | mucosal h | Inflamed | CD19       | protein_cc | chr16 | 28943260 | 28950667 | + | 2711  | 686.9379 | 0        | -1.4334  | 0.372013 | -3.8531  | 0.000207 | 0.003227 | 1 |
| ENSG0000 | mucosal h | Inflamed | ALDOB      | protein_cc | chr9  | 1.04E+08 | 1.04E+08 | - | 2451  | 5763.129 | 0.004773 | -1.96381 | 0.509958 | -3.85092 | 0.000209 | 0.003251 | 1 |
| ENSG0000 | mucosal h | Inflamed | STXBP5-AS  | antisense  | chr6  | 1.47E+08 | 1.48E+08 | - | 6011  | 104.9141 | 0        | 0.94884  | 0.246463 | 3.849837 | 0.00021  | 0.00326  | 1 |
| ENSG0000 | mucosal h | Inflamed | SCIMP      | protein_cc | chr17 | 5112256  | 5138155  | - | 4208  | 459.9427 | 0        | -0.71269 | 0.185125 | -3.8498  | 0.00021  | 0.00326  | 1 |
| ENSG0000 | mucosal h | Inflamed | IGLV3-10   | IG_V_gene  | chr22 | 23154244 | 23154782 | + | 386   | 3816.468 | 0        | -1.51415 | 0.393352 | -3.84935 | 0.00021  | 0.003263 | 1 |
| ENSG0000 | mucosal h | Inflamed | GTF2IRD2f  | protein_cc | chr7  | 74508364 | 74565623 | + | 8087  | 188.9475 | 0        | 0.568417 | 0.147727 | 3.847744 | 0.000211 | 0.00328  | 1 |
| ENSG0000 | mucosal h | Inflamed | PGRMC1     | protein_cc | chrX  | 1.18E+08 | 1.18E+08 | + | 1911  | 2882.933 | 0        | 0.432838 | 0.1125   | 3.847449 | 0.000211 | 0.003281 | 1 |
| ENSG0000 | mucosal h | Inflamed | CTB-4116.2 | lincRNA    | chr17 | 8870840  | 8880312  | + | 557   | 13.42243 | 0.031026 | -0.75159 | 0.195388 | -3.84667 | 0.000212 | 0.003288 | 1 |
| ENSG0000 | mucosal h | Inflamed | LINC0039C  | lincRNA    | chr13 | 44680514 | 44711372 | - | 340   | 2.610979 | 0.441527 | 0.652017 | 0.169538 | 3.845855 | 0.000213 | 0.003296 | 1 |
| ENSG0000 | mucosal h | Inflamed | TMEM204    | protein_cc | chr16 | 1578689  | 1605581  | + | 2047  | 522.1169 | 0        | -0.76193 | 0.198129 | -3.84563 | 0.000213 | 0.003297 | 1 |
| ENSG0000 | mucosal h | Inflamed | THRB-IT1   | sense_intr | chr3  | 24496627 | 24500925 | - | 1754  | 1.155131 | 0.742243 | 0.488043 | 0.126926 | 3.845086 | 0.000213 | 0.003298 | 1 |
| ENSG0000 | mucosal h | Inflamed | RP11-80Hf  | antisense  | chr10 | 91405039 | 91410424 | + | 605   | 1.085919 | 0.735084 | 0.448043 | 0.116525 | 3.84505  | 0.000213 | 0.003298 | 1 |
| ENSG0000 | mucosal h | Inflamed | IFNAR2     | protein_cc | chr21 | 34602206 | 34637980 | + | 4614  | 1695.186 | 0        | -0.58207 | 0.151384 | -3.845   | 0.000213 | 0.003298 | 1 |

|          |           |          |           |                  |          |          |   |       |          |          |          |          |          |          |          |   |
|----------|-----------|----------|-----------|------------------|----------|----------|---|-------|----------|----------|----------|----------|----------|----------|----------|---|
| ENSG0000 | mucosal h | Inflamed | C9orf24   | protein_cc chr9  | 34379017 | 34397830 | - | 1439  | 22.45346 | 0.011933 | 0.785066 | 0.204194 | 3.844708 | 0.000213 | 0.0033   | 1 |
| ENSG0000 | mucosal h | Inflamed | CTSL      | protein_cc chr9  | 90340434 | 90346308 | + | 2366  | 2232.069 | 0        | -0.75977 | 0.197641 | -3.84422 | 0.000214 | 0.003303 | 1 |
| ENSG0000 | mucosal h | Inflamed | GLA       | protein_cc chrX  | 1.01E+08 | 1.01E+08 | - | 2065  | 636.3675 | 0        | -0.47289 | 0.123033 | -3.84359 | 0.000214 | 0.003308 | 1 |
| ENSG0000 | mucosal h | Inflamed | IFT57     | protein_cc chr3  | 1.08E+08 | 1.08E+08 | - | 3766  | 784.9714 | 0        | 0.437064 | 0.113716 | 3.843461 | 0.000214 | 0.003308 | 1 |
| ENSG0000 | mucosal h | Inflamed | RAVER2    | protein_cc chr1  | 65210778 | 65298915 | + | 6070  | 2021.63  | 0        | 0.878158 | 0.228547 | 3.842343 | 0.000215 | 0.00332  | 1 |
| ENSG0000 | mucosal h | Inflamed | TMEM236   | protein_cc chr10 | 17794251 | 17842867 | + | 5464  | 162.2959 | 0.059666 | 1.478607 | 0.384846 | 3.842074 | 0.000215 | 0.003321 | 1 |
| ENSG0000 | mucosal h | Inflamed | LA16c-395 | antisense chr16  | 1630528  | 1660329  | + | 485   | 8.916468 | 0.190931 | 0.944562 | 0.24587  | 3.841722 | 0.000216 | 0.003323 | 1 |
| ENSG0000 | mucosal h | Inflamed | EPHB1     | protein_cc chr3  | 1.34E+08 | 1.35E+08 | + | 6956  | 70.06205 | 0.019093 | -1.16907 | 0.304499 | -3.83934 | 0.000218 | 0.003349 | 1 |
| ENSG0000 | mucosal h | Inflamed | SH2D3C    | protein_cc chr9  | 1.31E+08 | 1.31E+08 | - | 4599  | 860.6301 | 0        | -0.84979 | 0.221393 | -3.8384  | 0.000218 | 0.003358 | 1 |
| ENSG0000 | mucosal h | Inflamed | RP11-202C | pseudoger chr12  | 93517839 | 93518319 | - | 481   | 0.957041 | 0.756563 | 0.456277 | 0.118892 | 3.837746 | 0.000219 | 0.003364 | 1 |
| ENSG0000 | mucosal h | Inflamed | GBP5      | protein_cc chr1  | 89724633 | 89738544 | - | 8200  | 1300.945 | 0        | -1.34744 | 0.351187 | -3.83683 | 0.00022  | 0.003373 | 1 |
| ENSG0000 | mucosal h | Inflamed | SLC2A5    | protein_cc chr1  | 9095166  | 9148537  | - | 6854  | 459.4368 | 0        | -0.74816 | 0.195031 | -3.83614 | 0.00022  | 0.003379 | 1 |
| ENSG0000 | mucosal h | Inflamed | PAPLN     | protein_cc chr14 | 73704205 | 73741348 | + | 7699  | 2175.208 | 0        | -0.86277 | 0.224948 | -3.83541 | 0.000221 | 0.003386 | 1 |
| ENSG0000 | mucosal h | Inflamed | TLR2      | protein_cc chr4  | 1.55E+08 | 1.55E+08 | + | 4200  | 442.6611 | 0        | -1.19339 | 0.311161 | -3.83528 | 0.000221 | 0.003386 | 1 |
| ENSG0000 | mucosal h | Inflamed | LEPRE1    | protein_cc chr1  | 43212006 | 43232755 | - | 6766  | 1098.365 | 0        | -0.6264  | 0.163355 | -3.8346  | 0.000221 | 0.00339  | 1 |
| ENSG0000 | mucosal h | Inflamed | RP11-120k | sense_intr chr13 | 1.14E+08 | 1.14E+08 | + | 647   | 3.749403 | 0.336516 | 0.736273 | 0.19201  | 3.834562 | 0.000221 | 0.00339  | 1 |
| ENSG0000 | mucosal h | Inflamed | RP11-809C | lincRNA chr10    | 714400   | 715521   | + | 1122  | 12.35084 | 0.109785 | 0.852559 | 0.222399 | 3.833469 | 0.000222 | 0.003402 | 1 |
| ENSG0000 | mucosal h | Inflamed | POPDC3    | protein_cc chr6  | 1.06E+08 | 1.06E+08 | - | 1881  | 22.52029 | 0.293556 | -1.44489 | 0.377038 | -3.83221 | 0.000223 | 0.003415 | 1 |
| ENSG0000 | mucosal h | Inflamed | ENPP7P4   | pseudoger chr3   | 1.26E+08 | 1.26E+08 | + | 1086  | 7.799523 | 0.167064 | 0.973545 | 0.254128 | 3.83092  | 0.000224 | 0.003428 | 1 |
| ENSG0000 | mucosal h | Inflamed | LYL1      | protein_cc chr19 | 13209847 | 13213975 | - | 3119  | 418.2554 | 0        | -0.80079 | 0.209051 | -3.83058 | 0.000224 | 0.003431 | 1 |
| ENSG0000 | mucosal h | Inflamed | SLC43A3   | protein_cc chr11 | 57174427 | 57195053 | - | 3664  | 533.5871 | 0        | -0.68217 | 0.178098 | -3.83031 | 0.000225 | 0.003431 | 1 |
| ENSG0000 | mucosal h | Inflamed | MGAT4B    | protein_cc chr5  | 1.79E+08 | 1.79E+08 | - | 5495  | 14700.68 | 0        | 0.51943  | 0.135615 | 3.830177 | 0.000225 | 0.003431 | 1 |
| ENSG0000 | mucosal h | Inflamed | SLAMF6    | protein_cc chr1  | 1.6E+08  | 1.6E+08  | - | 2746  | 480.3461 | 0        | -0.93664 | 0.244592 | -3.82938 | 0.000225 | 0.003439 | 1 |
| ENSG0000 | mucosal h | Inflamed | FMO1      | protein_cc chr1  | 1.71E+08 | 1.71E+08 | + | 3574  | 52.63246 | 0.159905 | -1.70836 | 0.446156 | -3.82907 | 0.000226 | 0.003441 | 1 |
| ENSG0000 | mucosal h | Inflamed | PPARGC1B  | protein_cc chr5  | 1.49E+08 | 1.49E+08 | + | 12889 | 1901.635 | 0        | 0.865536 | 0.226105 | 3.828027 | 0.000226 | 0.003452 | 1 |
| ENSG0000 | mucosal h | Inflamed | FCGR2B    | protein_cc chr1  | 1.62E+08 | 1.62E+08 | + | 6996  | 491.3007 | 0        | -1.01326 | 0.264726 | -3.82759 | 0.000227 | 0.003455 | 1 |
| ENSG0000 | mucosal h | Inflamed | RP11-286E | antisense chr4   | 1.09E+08 | 1.09E+08 | - | 3099  | 5.949881 | 0.205251 | 0.684784 | 0.178933 | 3.827033 | 0.000227 | 0.003456 | 1 |
| ENSG0000 | mucosal h | Inflamed | HAS2-AS1  | antisense chr8   | 1.23E+08 | 1.23E+08 | + | 1796  | 12.46539 | 0.064439 | 0.822352 | 0.214882 | 3.826986 | 0.000227 | 0.003456 | 1 |
| ENSG0000 | mucosal h | Inflamed | FOXE3     | protein_cc chr1  | 47881744 | 47883723 | + | 1980  | 9.300716 | 0.124105 | 0.729676 | 0.190666 | 3.826985 | 0.000227 | 0.003456 | 1 |
| ENSG0000 | mucosal h | Inflamed | RP11-404E | antisense chr1   | 1.52E+08 | 1.52E+08 | - | 535   | 1.217184 | 0.701671 | 0.542949 | 0.141939 | 3.825231 | 0.000229 | 0.003476 | 1 |
| ENSG0000 | mucosal h | Inflamed | TRPC4     | protein_cc chr13 | 38210773 | 38444562 | - | 4205  | 41.79236 | 0.026253 | -0.98925 | 0.258704 | -3.82388 | 0.00023  | 0.00349  | 1 |
| ENSG0000 | mucosal h | Inflamed | PF4       | protein_cc chr4  | 74846794 | 74847841 | - | 604   | 77.52029 | 0.002387 | -1.17129 | 0.306317 | -3.82377 | 0.00023  | 0.00349  | 1 |
| ENSG0000 | mucosal h | Inflamed | LPXN      | protein_cc chr11 | 58294344 | 58345693 | - | 2467  | 909.179  | 0        | -0.57215 | 0.149683 | -3.82243 | 0.000231 | 0.003502 | 1 |
| ENSG0000 | mucosal h | Inflamed | CDC14A    | protein_cc chr1  | 1.01E+08 | 1.01E+08 | + | 5729  | 413.389  | 0.002387 | 0.935663 | 0.244791 | 3.822295 | 0.000231 | 0.003502 | 1 |
| ENSG0000 | mucosal h | Inflamed | MAST4-AS  | antisense chr5   | 66297211 | 66299781 | - | 777   | 6.128878 | 0.202864 | 0.636938 | 0.166639 | 3.822254 | 0.000231 | 0.003502 | 1 |
| ENSG0000 | mucosal h | Inflamed | AQP5      | protein_cc chr12 | 50355653 | 50359464 | + | 1885  | 90.66826 | 0.252983 | -2.07181 | 0.54241  | -3.81963 | 0.000233 | 0.003533 | 1 |
| ENSG0000 | mucosal h | Inflamed | FXYD5     | protein_cc chr19 | 35645633 | 35660786 | + | 2993  | 2040.513 | 0        | -0.75671 | 0.198123 | -3.81938 | 0.000233 | 0.003534 | 1 |
| ENSG0000 | mucosal h | Inflamed | MAML3     | protein_cc chr4  | 1.41E+08 | 1.41E+08 | - | 7030  | 924.7566 | 0        | 0.632453 | 0.165602 | 3.819123 | 0.000234 | 0.003535 | 1 |
| ENSG0000 | mucosal h | Inflamed | FAM95B1   | processed_chr9   | 42466317 | 42474239 | + | 7923  | 31.36993 | 0.040573 | 1.040419 | 0.272575 | 3.817004 | 0.000235 | 0.00356  | 1 |
| ENSG0000 | mucosal h | Inflamed | RASGRP4   | protein_cc chr19 | 38899695 | 38916945 | - | 3848  | 421.7184 | 0        | -0.97042 | 0.254263 | -3.81658 | 0.000236 | 0.003563 | 1 |

|          |           |          |           |                  |          |          |   |      |          |          |          |          |          |          |          |   |
|----------|-----------|----------|-----------|------------------|----------|----------|---|------|----------|----------|----------|----------|----------|----------|----------|---|
| ENSG0000 | mucosal h | Inflamed | PHF7      | protein_cc chr3  | 52444673 | 52457657 | + | 3367 | 260.9547 | 0        | 0.593461 | 0.155518 | 3.816028 | 0.000236 | 0.003568 | 1 |
| ENSG0000 | mucosal h | Inflamed | VKORC1    | protein_cc chr16 | 31102163 | 31107301 | - | 2191 | 328.3031 | 0        | -0.50357 | 0.132017 | -3.81442 | 0.000238 | 0.003586 | 1 |
| ENSG0000 | mucosal h | Inflamed | DEPDC7    | protein_cc chr11 | 33037410 | 33055128 | + | 3326 | 159.8735 | 0        | 0.830244 | 0.217685 | 3.813969 | 0.000238 | 0.00359  | 1 |
| ENSG0000 | mucosal h | Inflamed | ARHGAP25  | protein_cc chr2  | 68906733 | 69053965 | + | 5509 | 1038.382 | 0        | -0.80972 | 0.21234  | -3.81333 | 0.000239 | 0.003596 | 1 |
| ENSG0000 | mucosal h | Inflamed | ALDH1L2   | protein_cc chr12 | 1.05E+08 | 1.05E+08 | - | 8501 | 471.1718 | 0.004773 | -1.13549 | 0.297821 | -3.81265 | 0.000239 | 0.003601 | 1 |
| ENSG0000 | mucosal h | Inflamed | RP11-383I | lincRNA chr3     | 99521543 | 99524902 | - | 3360 | 4.706444 | 0.260143 | 0.742418 | 0.194726 | 3.81262  | 0.000239 | 0.003601 | 1 |
| ENSG0000 | mucosal h | Inflamed | PSMB8     | protein_cc chr6  | 32808494 | 32812480 | - | 2006 | 4561.017 | 0        | -0.36072 | 0.094618 | -3.81231 | 0.000239 | 0.003603 | 1 |
| ENSG0000 | mucosal h | Inflamed | SLC25A21  | protein_cc chr14 | 37641093 | 37643016 | + | 1924 | 28.06205 | 0.009547 | 0.668394 | 0.175337 | 3.81206  | 0.00024  | 0.003604 | 1 |
| ENSG0000 | mucosal h | Inflamed | LINC00476 | processed_chr9   | 98521513 | 98638259 | - | 5100 | 142.0764 | 0        | 0.521009 | 0.136688 | 3.811676 | 0.00024  | 0.003606 | 1 |
| ENSG0000 | mucosal h | Inflamed | SERPINA6  | protein_cc chr14 | 94770585 | 94789731 | - | 1852 | 65.39857 | 0.023866 | 1.213161 | 0.318403 | 3.810143 | 0.000241 | 0.003622 | 1 |
| ENSG0000 | mucosal h | Inflamed | CRISP3    | protein_cc chr6  | 49695097 | 49712150 | - | 2247 | 1.653938 | 0.785203 | -0.63096 | 0.1656   | -3.81014 | 0.000241 | 0.003622 | 1 |
| ENSG0000 | mucosal h | Inflamed | PXDC1     | protein_cc chr6  | 3722848  | 3752260  | - | 2474 | 630.6563 | 0        | -0.57577 | 0.151134 | -3.80967 | 0.000242 | 0.003626 | 1 |
| ENSG0000 | mucosal h | Inflamed | SYTL3     | protein_cc chr6  | 1.59E+08 | 1.59E+08 | + | 2790 | 306.3747 | 0        | -0.58299 | 0.153042 | -3.80935 | 0.000242 | 0.003628 | 1 |
| ENSG0000 | mucosal h | Inflamed | AC013268  | lincRNA chr2     | 1.11E+08 | 1.11E+08 | + | 3295 | 124.9499 | 0.004773 | 0.825414 | 0.216712 | 3.808809 | 0.000242 | 0.003633 | 1 |
| ENSG0000 | mucosal h | Inflamed | KLF4      | protein_cc chr9  | 1.1E+08  | 1.1E+08  | - | 3539 | 11676.52 | 0        | 0.852502 | 0.223861 | 3.808168 | 0.000243 | 0.003639 | 1 |
| ENSG0000 | mucosal h | Inflamed | MT1H      | protein_cc chr16 | 56703726 | 56705041 | + | 723  | 317.8496 | 0        | 1.338423 | 0.351518 | 3.807555 | 0.000243 | 0.003645 | 1 |
| ENSG0000 | mucosal h | Inflamed | GPR65     | protein_cc chr14 | 88471468 | 88478419 | + | 1786 | 187.3723 | 0        | -0.81841 | 0.214959 | -3.8073  | 0.000244 | 0.003646 | 1 |
| ENSG0000 | mucosal h | Inflamed | RP11-74E2 | antisense chr17  | 2615603  | 2616127  | + | 443  | 29.91885 | 0.016706 | 0.669022 | 0.175734 | 3.807006 | 0.000244 | 0.003648 | 1 |
| ENSG0000 | mucosal h | Inflamed | FZD5      | protein_cc chr2  | 2.09E+08 | 2.09E+08 | - | 6708 | 4736.234 | 0        | 0.890219 | 0.233853 | 3.806738 | 0.000244 | 0.003649 | 1 |
| ENSG0000 | mucosal h | Inflamed | RP1-240K  | processed_chr14  | 73929129 | 73943880 | + | 680  | 11.76611 | 0.066826 | 0.740286 | 0.194496 | 3.806187 | 0.000245 | 0.003654 | 1 |
| ENSG0000 | mucosal h | Inflamed | RP5-881L2 | antisense chr20  | 42976192 | 42983825 | - | 906  | 170.3938 | 0.009547 | 1.226242 | 0.322207 | 3.805757 | 0.000245 | 0.003657 | 1 |
| ENSG0000 | mucosal h | Inflamed | CCL2      | protein_cc chr17 | 32582304 | 32584222 | + | 1137 | 1229.821 | 0        | -1.08355 | 0.284769 | -3.80501 | 0.000246 | 0.003664 | 1 |
| ENSG0000 | mucosal h | Inflamed | ANGPTL2   | protein_cc chr9  | 1.3E+08  | 1.3E+08  | - | 3889 | 3314.317 | 0        | -1.09807 | 0.288594 | -3.8049  | 0.000246 | 0.003664 | 1 |
| ENSG0000 | mucosal h | Inflamed | RP11-566k | antisense chr16  | 89986235 | 89989070 | - | 985  | 2.393795 | 0.441527 | -0.65712 | 0.172719 | -3.80458 | 0.000246 | 0.003666 | 1 |
| ENSG0000 | mucosal h | Inflamed | CASS4     | protein_cc chr20 | 54987168 | 55034396 | + | 4025 | 240.5131 | 0.004773 | -0.94441 | 0.248256 | -3.80418 | 0.000246 | 0.003669 | 1 |
| ENSG0000 | mucosal h | Inflamed | RP11-798k | lincRNA chr15    | 67278699 | 67351591 | - | 1015 | 6.427208 | 0.570406 | 0.809575 | 0.212827 | 3.80392  | 0.000247 | 0.003671 | 1 |
| ENSG0000 | mucosal h | Inflamed | CXorf36   | protein_cc chrX  | 45007619 | 45060146 | - | 6720 | 653.3986 | 0        | -0.8314  | 0.218579 | -3.80364 | 0.000247 | 0.003672 | 1 |
| ENSG0000 | mucosal h | Inflamed | OSBPL1A   | protein_cc chr18 | 21742008 | 21977844 | - | 8022 | 835.4177 | 0        | 0.597653 | 0.157178 | 3.802388 | 0.000248 | 0.003686 | 1 |
| ENSG0000 | mucosal h | Inflamed | RP11-290F | lincRNA chr20    | 48909257 | 48931459 | + | 3014 | 32.46778 | 0.019093 | -0.96478 | 0.253761 | -3.80194 | 0.000248 | 0.00369  | 1 |
| ENSG0000 | mucosal h | Inflamed | CD82      | protein_cc chr11 | 44585977 | 44641913 | + | 4054 | 3403.126 | 0        | -0.69913 | 0.183894 | -3.80181 | 0.000248 | 0.00369  | 1 |
| ENSG0000 | mucosal h | Inflamed | SLC35G1   | protein_cc chr10 | 95653730 | 95715819 | + | 6829 | 498.9379 | 0        | 0.858393 | 0.225882 | 3.800177 | 0.00025  | 0.003709 | 1 |
| ENSG0000 | mucosal h | Inflamed | MRPS25    | protein_cc chr3  | 15083967 | 15106842 | - | 5383 | 2032.582 | 0        | 0.422378 | 0.111157 | 3.799835 | 0.00025  | 0.003709 | 1 |
| ENSG0000 | mucosal h | Inflamed | GMPPB     | protein_cc chr3  | 49754277 | 49761384 | - | 6742 | 534.6396 | 0        | -0.40793 | 0.107357 | -3.79981 | 0.00025  | 0.003709 | 1 |
| ENSG0000 | mucosal h | Inflamed | LHX2      | protein_cc chr9  | 1.27E+08 | 1.27E+08 | + | 2655 | 11.54654 | 0.062053 | -0.76633 | 0.201692 | -3.79952 | 0.00025  | 0.00371  | 1 |
| ENSG0000 | mucosal h | Inflamed | TFCP2L1   | protein_cc chr2  | 1.22E+08 | 1.22E+08 | - | 9372 | 7500.418 | 0        | 1.087401 | 0.286199 | 3.799452 | 0.00025  | 0.00371  | 1 |
| ENSG0000 | mucosal h | Inflamed | MMP25     | protein_cc chr16 | 3096682  | 3110727  | + | 4126 | 1374.465 | 0        | -1.09428 | 0.288065 | -3.79874 | 0.000251 | 0.003717 | 1 |
| ENSG0000 | mucosal h | Inflamed | TSEN2     | protein_cc chr3  | 12525931 | 12581122 | + | 5667 | 441.4439 | 0        | 0.693776 | 0.182657 | 3.798234 | 0.000252 | 0.003722 | 1 |
| ENSG0000 | mucosal h | Inflamed | KLB       | protein_cc chr4  | 39408473 | 39453156 | + | 6082 | 56.53222 | 0.019093 | 1.2147   | 0.319822 | 3.798044 | 0.000252 | 0.003722 | 1 |
| ENSG0000 | mucosal h | Inflamed | DACT2     | protein_cc chr6  | 1.69E+08 | 1.69E+08 | - | 4223 | 93.19809 | 0.026253 | 1.3629   | 0.358944 | 3.796968 | 0.000253 | 0.003734 | 1 |
| ENSG0000 | mucosal h | Inflamed | SAMD11    | protein_cc chr1  | 860260   | 879955   | + | 3205 | 499.1146 | 0        | -0.64487 | 0.169845 | -3.79679 | 0.000253 | 0.003734 | 1 |



|          |           |          |           |                  |          |          |   |       |          |          |          |          |          |          |          |   |
|----------|-----------|----------|-----------|------------------|----------|----------|---|-------|----------|----------|----------|----------|----------|----------|----------|---|
| ENSG0000 | mucosal h | Inflamed | FCER1G    | protein_cc chr1  | 1.61E+08 | 1.61E+08 | + | 964   | 1762.422 | 0        | -0.82283 | 0.216751 | -3.79618 | 0.000253 | 0.00374  | 1 |
| ENSG0000 | mucosal h | Inflamed | HGF       | protein_cc chr7  | 81328322 | 81399754 | - | 8897  | 435.4654 | 0.002387 | -1.25383 | 0.330314 | -3.79588 | 0.000254 | 0.003742 | 1 |
| ENSG0000 | mucosal h | Inflamed | GDPD1     | protein_cc chr17 | 57297828 | 57353328 | + | 2970  | 71.61098 | 0        | 0.623262 | 0.164207 | 3.795582 | 0.000254 | 0.003744 | 1 |
| ENSG0000 | mucosal h | Inflamed | SIRPA     | protein_cc chr20 | 1875154  | 1920543  | + | 4032  | 3339.537 | 0        | -0.77039 | 0.202976 | -3.79544 | 0.000254 | 0.003744 | 1 |
| ENSG0000 | mucosal h | Inflamed | AC011891  | lincRNA chr7     | 12693804 | 12694610 | + | 432   | 26.59666 | 0.114558 | 1.313448 | 0.346114 | 3.794844 | 0.000255 | 0.003749 | 1 |
| ENSG0000 | mucosal h | Inflamed | CD7       | protein_cc chr17 | 80272744 | 80275478 | - | 2735  | 843.6874 | 0        | -0.69365 | 0.182804 | -3.79451 | 0.000255 | 0.003752 | 1 |
| ENSG0000 | mucosal h | Inflamed | RENB      | protein_cc chrX  | 1.53E+08 | 1.53E+08 | - | 2146  | 345.1408 | 0        | -0.5458  | 0.143849 | -3.79425 | 0.000255 | 0.003753 | 1 |
| ENSG0000 | mucosal h | Inflamed | FOXS1     | protein_cc chr20 | 30432103 | 30433420 | - | 1318  | 60.91408 | 0.004773 | -1.04245 | 0.274766 | -3.79396 | 0.000255 | 0.003755 | 1 |
| ENSG0000 | mucosal h | Inflamed | RP11-4231 | antisense chr5   | 1.77E+08 | 1.77E+08 | + | 1421  | 13.95943 | 0.026253 | 0.662671 | 0.174675 | 3.793742 | 0.000256 | 0.003756 | 1 |
| ENSG0000 | mucosal h | Inflamed | IFT122    | protein_cc chr3  | 1.29E+08 | 1.29E+08 | + | 9395  | 1016.716 | 0        | 0.393091 | 0.103627 | 3.793338 | 0.000256 | 0.003757 | 1 |
| ENSG0000 | mucosal h | Inflamed | EVI2B     | protein_cc chr17 | 29630784 | 29641130 | - | 2072  | 1046.835 | 0        | -0.93881 | 0.247492 | -3.79328 | 0.000256 | 0.003757 | 1 |
| ENSG0000 | mucosal h | Inflamed | FOXO6     | protein_cc chr1  | 41827594 | 41849262 | + | 2398  | 17.5537  | 0.023866 | 0.817816 | 0.215604 | 3.793144 | 0.000256 | 0.003757 | 1 |
| ENSG0000 | mucosal h | Inflamed | PLA2G12A  | protein_cc chr4  | 1.11E+08 | 1.11E+08 | - | 5228  | 869.2196 | 0        | 0.496631 | 0.130954 | 3.792402 | 0.000257 | 0.003765 | 1 |
| ENSG0000 | mucosal h | Inflamed | RP11-322E | lincRNA chr18    | 33023833 | 33047052 | - | 916   | 5.355609 | 0.183771 | -0.70013 | 0.184623 | -3.79221 | 0.000257 | 0.003765 | 1 |
| ENSG0000 | mucosal h | Inflamed | ZNF311    | protein_cc chr6  | 28962562 | 28973093 | - | 3176  | 70.45823 | 0        | 0.785632 | 0.207197 | 3.791719 | 0.000257 | 0.00377  | 1 |
| ENSG0000 | mucosal h | Inflamed | RP5-1119A | lincRNA chr22    | 36841445 | 36850991 | - | 372   | 5.300716 | 0.164678 | 0.698557 | 0.184258 | 3.791196 | 0.000258 | 0.003774 | 1 |
| ENSG0000 | mucosal h | Inflamed | GIMAP5    | protein_cc chr7  | 1.5E+08  | 1.5E+08  | + | 6031  | 1266.671 | 0        | -0.63885 | 0.168516 | -3.79106 | 0.000258 | 0.003774 | 1 |
| ENSG0000 | mucosal h | Inflamed | VCAN      | protein_cc chr5  | 82767284 | 82878122 | + | 14831 | 2546.764 | 0        | -0.91629 | 0.24175  | -3.79021 | 0.000259 | 0.003781 | 1 |
| ENSG0000 | mucosal h | Inflamed | CATSPER1  | protein_cc chr11 | 65784223 | 65793988 | - | 2687  | 9.988067 | 0.052506 | -0.79079 | 0.208641 | -3.79019 | 0.000259 | 0.003781 | 1 |
| ENSG0000 | mucosal h | Inflamed | LAMC3     | protein_cc chr9  | 1.34E+08 | 1.34E+08 | + | 7594  | 1137.955 | 0        | -1.16002 | 0.30607  | -3.79004 | 0.000259 | 0.003781 | 1 |
| ENSG0000 | mucosal h | Inflamed | ACVR1B    | protein_cc chr12 | 52345451 | 52390862 | + | 5690  | 4136.57  | 0        | 0.689475 | 0.181934 | 3.789698 | 0.000259 | 0.003784 | 1 |
| ENSG0000 | mucosal h | Inflamed | ZNF768    | protein_cc chr16 | 30535325 | 30538142 | - | 2392  | 2460.971 | 0        | 0.438769 | 0.115786 | 3.789483 | 0.000259 | 0.003785 | 1 |
| ENSG0000 | mucosal h | Inflamed | RP4-758J2 | lincRNA chr1     | 54492356 | 54494172 | - | 1817  | 107.6754 | 0        | 0.779246 | 0.205648 | 3.78922  | 0.00026  | 0.003786 | 1 |
| ENSG0000 | mucosal h | Inflamed | PACSIN2   | protein_cc chr22 | 43231418 | 43411151 | - | 4545  | 6499.387 | 0        | 0.443058 | 0.116952 | 3.788356 | 0.00026  | 0.003796 | 1 |
| ENSG0000 | mucosal h | Inflamed | HCN4      | protein_cc chr15 | 73612200 | 73661605 | - | 7228  | 10.05251 | 0.109785 | 1.028297 | 0.271451 | 3.788152 | 0.000261 | 0.003796 | 1 |
| ENSG0000 | mucosal h | Inflamed | TMCC2     | protein_cc chr1  | 2.05E+08 | 2.05E+08 | + | 4922  | 144.3771 | 0        | -0.82744 | 0.218489 | -3.78712 | 0.000262 | 0.003808 | 1 |
| ENSG0000 | mucosal h | Inflamed | RP11-191C | antisense chr1   | 51983981 | 52027301 | + | 476   | 31.93556 | 0.002387 | 0.729021 | 0.192516 | 3.786802 | 0.000262 | 0.00381  | 1 |
| ENSG0000 | mucosal h | Inflamed | ARID3A    | protein_cc chr19 | 925781   | 975939   | + | 7504  | 1040.315 | 0        | -0.68314 | 0.180424 | -3.78631 | 0.000262 | 0.003814 | 1 |
| ENSG0000 | mucosal h | Inflamed | SNX30     | protein_cc chr9  | 1.16E+08 | 1.16E+08 | + | 11578 | 2144.167 | 0        | 0.821495 | 0.216987 | 3.78591  | 0.000263 | 0.003816 | 1 |
| ENSG0000 | mucosal h | Inflamed | PML       | protein_cc chr15 | 74287014 | 74340153 | + | 12657 | 4104.575 | 0        | -0.55777 | 0.147329 | -3.78585 | 0.000263 | 0.003816 | 1 |
| ENSG0000 | mucosal h | Inflamed | STRADB    | protein_cc chr2  | 2.02E+08 | 2.02E+08 | + | 3242  | 1220.957 | 0        | 0.611297 | 0.161478 | 3.785631 | 0.000263 | 0.003817 | 1 |
| ENSG0000 | mucosal h | Inflamed | C20orf112 | protein_cc chr20 | 31030862 | 31172876 | - | 9448  | 4288.737 | 0        | 0.58657  | 0.154981 | 3.784776 | 0.000264 | 0.003825 | 1 |
| ENSG0000 | mucosal h | Inflamed | RP11-96D1 | antisense chr16  | 68259872 | 68263048 | - | 3177  | 741.6587 | 0        | 1.041254 | 0.275119 | 3.784735 | 0.000264 | 0.003825 | 1 |
| ENSG0000 | mucosal h | Inflamed | C22orf34  | protein_cc chr22 | 49808176 | 50051190 | - | 6755  | 77.7327  | 0.002387 | -0.7583  | 0.200397 | -3.78399 | 0.000264 | 0.003831 | 1 |
| ENSG0000 | mucosal h | Inflamed | MROH7-IT1 | protein_cc chr1  | 55107459 | 55207981 | + | 7090  | 4.508353 | 0.386635 | 0.746689 | 0.197331 | 3.783948 | 0.000265 | 0.003831 | 1 |
| ENSG0000 | mucosal h | Inflamed | CXCL11    | protein_cc chr4  | 76954835 | 76962568 | - | 1908  | 273.6396 | 0.031026 | -1.78159 | 0.470886 | -3.78348 | 0.000265 | 0.003836 | 1 |
| ENSG0000 | mucosal h | Inflamed | MST1P2    | pseudoger chr1   | 16972069 | 16976914 | + | 2686  | 153.401  | 0.00716  | 1.169776 | 0.309211 | 3.783101 | 0.000265 | 0.003839 | 1 |
| ENSG0000 | mucosal h | Inflamed | HAMP      | protein_cc chr19 | 35771619 | 35776046 | + | 3010  | 9.868735 | 0.186158 | -1.06033 | 0.280296 | -3.7829  | 0.000265 | 0.003839 | 1 |
| ENSG0000 | mucosal h | Inflamed | KTN1-AS1  | antisense chr14  | 55965996 | 56046828 | - | 3595  | 46.55847 | 0        | 0.452511 | 0.119682 | 3.780934 | 0.000267 | 0.003864 | 1 |
| ENSG0000 | mucosal h | Inflamed | CREB3L4   | protein_cc chr1  | 1.54E+08 | 1.54E+08 | + | 2911  | 586.5728 | 0        | 0.526484 | 0.139261 | 3.780551 | 0.000268 | 0.003867 | 1 |

|          |           |          |           |            |       |          |          |   |       |          |          |          |          |          |          |          |   |
|----------|-----------|----------|-----------|------------|-------|----------|----------|---|-------|----------|----------|----------|----------|----------|----------|----------|---|
| ENSG0000 | mucosal h | Inflamed | IGLV5-45  | IG_V_gene  | chr22 | 22730355 | 22730874 | + | 397   | 1427.527 | 0        | -1.38617 | 0.366689 | -3.78024 | 0.000268 | 0.003869 | 1 |
| ENSG0000 | mucosal h | Inflamed | OSR1      | protein_cc | chr2  | 19551246 | 19558414 | - | 5313  | 91.33174 | 0.00716  | 1.291253 | 0.341621 | 3.779783 | 0.000268 | 0.003873 | 1 |
| ENSG0000 | mucosal h | Inflamed | ADAM19    | protein_cc | chr5  | 1.57E+08 | 1.57E+08 | - | 7710  | 3459.294 | 0        | -0.76992 | 0.203768 | -3.7784  | 0.00027  | 0.003889 | 1 |
| ENSG0000 | mucosal h | Inflamed | PLEKHO1   | protein_cc | chr1  | 1.5E+08  | 1.5E+08  | + | 6629  | 2024.031 | 0        | -0.7084  | 0.187526 | -3.77763 | 0.00027  | 0.003898 | 1 |
| ENSG0000 | mucosal h | Inflamed | Y_RNA     | antisense  | chr8  | 81396796 | 81397854 | - | 1059  | 41.90931 | 0.009547 | 0.737783 | 0.195338 | 3.77695  | 0.000271 | 0.003905 | 1 |
| ENSG0000 | mucosal h | Inflamed | RP11-290F | lincRNA    | chr4  | 1.85E+08 | 1.85E+08 | - | 2768  | 504.2434 | 0        | -1.08538 | 0.287406 | -3.77648 | 0.000272 | 0.003909 | 1 |
| ENSG0000 | mucosal h | Inflamed | RPN2      | protein_cc | chr20 | 35806813 | 35870022 | + | 2815  | 11918.03 | 0        | -0.48691 | 0.128941 | -3.77622 | 0.000272 | 0.003911 | 1 |
| ENSG0000 | mucosal h | Inflamed | ATP6V1F   | protein_cc | chr7  | 1.29E+08 | 1.29E+08 | + | 789   | 1409.461 | 0        | -0.55205 | 0.146251 | -3.77469 | 0.000273 | 0.00393  | 1 |
| ENSG0000 | mucosal h | Inflamed | FAM101B   | protein_cc | chr17 | 289769   | 295730   | - | 3621  | 1470.286 | 0        | -0.60527 | 0.160382 | -3.77394 | 0.000274 | 0.003936 | 1 |
| ENSG0000 | mucosal h | Inflamed | RP11-126k | antisense  | chr1  | 1.51E+08 | 1.51E+08 | + | 618   | 8.918854 | 0.059666 | -0.71846 | 0.190373 | -3.77394 | 0.000274 | 0.003936 | 1 |
| ENSG0000 | mucosal h | Inflamed | CHP2      | protein_cc | chr16 | 23765948 | 23770272 | + | 2382  | 5338.893 | 0.004773 | 1.67664  | 0.444289 | 3.773762 | 0.000274 | 0.003936 | 1 |
| ENSG0000 | mucosal h | Inflamed | RHEBL1    | protein_cc | chr12 | 49458468 | 49463808 | - | 1290  | 28.09547 | 0.002387 | -0.65004 | 0.172289 | -3.77296 | 0.000275 | 0.003945 | 1 |
| ENSG0000 | mucosal h | Inflamed | LINC00865 | lincRNA    | chr10 | 91589267 | 91600618 | + | 4272  | 183.3842 | 0.002387 | 0.681204 | 0.180581 | 3.772289 | 0.000276 | 0.003952 | 1 |
| ENSG0000 | mucosal h | Inflamed | AC011747  | antisense  | chr2  | 8806766  | 8821993  | - | 2060  | 64.78043 | 0.004773 | 1.035865 | 0.274691 | 3.771019 | 0.000277 | 0.003967 | 1 |
| ENSG0000 | mucosal h | Inflamed | MTL5      | protein_cc | chr11 | 68474908 | 68519032 | - | 5833  | 277.6516 | 0        | 0.542581 | 0.143897 | 3.770612 | 0.000277 | 0.003971 | 1 |
| ENSG0000 | mucosal h | Inflamed | NIPAL1    | protein_cc | chr4  | 47916159 | 48042188 | + | 5981  | 1251.017 | 0        | 1.131487 | 0.300112 | 3.770217 | 0.000278 | 0.003974 | 1 |
| ENSG0000 | mucosal h | Inflamed | NXPE3     | protein_cc | chr3  | 1.01E+08 | 1.02E+08 | + | 9474  | 807.2625 | 0        | -0.92497 | 0.245351 | -3.76998 | 0.000278 | 0.003975 | 1 |
| ENSG0000 | mucosal h | Inflamed | AC013283  | miRNA      | chr12 | 98999652 | 98999738 | + | 87    | 23.51074 | 0.011933 | 0.626908 | 0.166304 | 3.769643 | 0.000278 | 0.003978 | 1 |
| ENSG0000 | mucosal h | Inflamed | RP11-275F | antisense  | chr1  | 51795326 | 51800996 | + | 1222  | 54.94511 | 0.009547 | 0.847505 | 0.224947 | 3.767581 | 0.00028  | 0.004004 | 1 |
| ENSG0000 | mucosal h | Inflamed | CRYBB2    | protein_cc | chr22 | 25615489 | 25627836 | + | 886   | 9.708831 | 0.119332 | 0.865778 | 0.229804 | 3.76747  | 0.00028  | 0.004004 | 1 |
| ENSG0000 | mucosal h | Inflamed | RP11-875C | antisense  | chr8  | 22842109 | 22876848 | - | 2268  | 98.22196 | 0        | -0.65014 | 0.172578 | -3.76724 | 0.00028  | 0.004005 | 1 |
| ENSG0000 | mucosal h | Inflamed | RP11-22P6 | antisense  | chr16 | 28890278 | 28891241 | - | 583   | 13.39857 | 0.00716  | -0.64639 | 0.171599 | -3.76688 | 0.000281 | 0.004008 | 1 |
| ENSG0000 | mucosal h | Inflamed | MAMDC2-   | antisense  | chr9  | 72700732 | 72790804 | - | 7244  | 12.03103 | 0.071599 | 0.846349 | 0.224691 | 3.766723 | 0.000281 | 0.004008 | 1 |
| ENSG0000 | mucosal h | Inflamed | KB-1980E6 | protein_cc | chr8  | 1.04E+08 | 1.04E+08 | + | 1231  | 5.76611  | 0.217184 | -0.84426 | 0.224165 | -3.76623 | 0.000281 | 0.004013 | 1 |
| ENSG0000 | mucosal h | Inflamed | NOTCH3    | protein_cc | chr19 | 15270444 | 15311792 | - | 8799  | 3047.842 | 0        | -1.18196 | 0.313872 | -3.76572 | 0.000282 | 0.004014 | 1 |
| ENSG0000 | mucosal h | Inflamed | MIR196A1  | miRNA      | chr17 | 46709852 | 46709921 | - | 70    | 33.28878 | 0.057279 | 1.033055 | 0.274333 | 3.765691 | 0.000282 | 0.004014 | 1 |
| ENSG0000 | mucosal h | Inflamed | LAIR1     | protein_cc | chr19 | 54865362 | 54882165 | - | 5700  | 1409.15  | 0        | -0.63878 | 0.169633 | -3.76567 | 0.000282 | 0.004014 | 1 |
| ENSG0000 | mucosal h | Inflamed | FADS1     | protein_cc | chr11 | 61567099 | 61596790 | - | 10228 | 770.42   | 0        | -1.02806 | 0.273028 | -3.76541 | 0.000282 | 0.004015 | 1 |
| ENSG0000 | mucosal h | Inflamed | ISG15     | protein_cc | chr1  | 948803   | 949920   | + | 711   | 970.6301 | 0        | -0.76054 | 0.201997 | -3.7651  | 0.000283 | 0.004018 | 1 |
| ENSG0000 | mucosal h | Inflamed | OXER1     | protein_cc | chr2  | 42989642 | 42991401 | - | 1760  | 214.6062 | 0        | 0.621028 | 0.164998 | 3.763844 | 0.000284 | 0.004033 | 1 |
| ENSG0000 | mucosal h | Inflamed | OPHN1     | protein_cc | chrX  | 67262186 | 67653755 | - | 8224  | 366.5012 | 0        | 0.711042 | 0.189053 | 3.761082 | 0.000287 | 0.00407  | 1 |
| ENSG0000 | mucosal h | Inflamed | CTD-2047  | antisense  | chr17 | 78325628 | 78388968 | - | 3983  | 22.92363 | 0.02864  | 0.719454 | 0.191296 | 3.760942 | 0.000287 | 0.00407  | 1 |
| ENSG0000 | mucosal h | Inflamed | LINC01006 | processed  | chr7  | 1.56E+08 | 1.56E+08 | - | 2246  | 54.91647 | 0        | 0.80517  | 0.214105 | 3.760624 | 0.000287 | 0.004072 | 1 |
| ENSG0000 | mucosal h | Inflamed | RP11-326F | antisense  | chr9  | 33166973 | 33179981 | + | 843   | 45.66348 | 0        | 0.626403 | 0.166575 | 3.76049  | 0.000287 | 0.004072 | 1 |
| ENSG0000 | mucosal h | Inflamed | SNX32     | protein_cc | chr11 | 65601112 | 65624367 | + | 3966  | 36.38186 | 0.01432  | 0.922486 | 0.245335 | 3.760102 | 0.000288 | 0.004075 | 1 |
| ENSG0000 | mucosal h | Inflamed | NWD1      | protein_cc | chr19 | 16830787 | 16928774 | + | 8470  | 68.0358  | 0.026253 | 1.153025 | 0.306676 | 3.759754 | 0.000288 | 0.004077 | 1 |
| ENSG0000 | mucosal h | Inflamed | SYT2      | protein_cc | chr1  | 2.03E+08 | 2.03E+08 | - | 7774  | 24.9284  | 0.052506 | 1.050726 | 0.27947  | 3.759703 | 0.000288 | 0.004077 | 1 |
| ENSG0000 | mucosal h | Inflamed | OAS2      | protein_cc | chr12 | 1.13E+08 | 1.13E+08 | + | 6264  | 2000.36  | 0        | -0.72358 | 0.192498 | -3.75889 | 0.000289 | 0.004086 | 1 |
| ENSG0000 | mucosal h | Inflamed | ST6GALNA  | protein_cc | chr9  | 1.31E+08 | 1.31E+08 | - | 5309  | 9264.091 | 0        | 0.843991 | 0.224575 | 3.758165 | 0.000289 | 0.004094 | 1 |
| ENSG0000 | mucosal h | Inflamed | RGS11     | protein_cc | chr16 | 318300   | 325980   | - | 4798  | 170.7542 | 0.004773 | 0.893864 | 0.237875 | 3.757697 | 0.00029  | 0.004099 | 1 |

|          |           |          |           |            |       |          |          |   |       |          |          |          |          |          |          |          |   |
|----------|-----------|----------|-----------|------------|-------|----------|----------|---|-------|----------|----------|----------|----------|----------|----------|----------|---|
| ENSG0000 | mucosal h | Inflamed | SIGLEC12  | protein_cc | chr19 | 51994611 | 52005043 | - | 2201  | 287.0573 | 0        | -0.81564 | 0.217076 | -3.75741 | 0.00029  | 0.0041   | 1 |
| ENSG0000 | mucosal h | Inflamed | RP11-598F | antisense  | chr12 | 273830   | 275487   | - | 1101  | 17.56325 | 0.200477 | -1.22581 | 0.32637  | -3.7559  | 0.000292 | 0.004118 | 1 |
| ENSG0000 | mucosal h | Inflamed | TMEM92    | protein_cc | chr17 | 48348767 | 48358844 | + | 3099  | 592.0668 | 0        | -0.79159 | 0.210763 | -3.75586 | 0.000292 | 0.004118 | 1 |
| ENSG0000 | mucosal h | Inflamed | CTB-36O1  | pseudoger  | chr5  | 1.34E+08 | 1.34E+08 | - | 747   | 258.3294 | 0        | 0.661064 | 0.176054 | 3.7549   | 0.000293 | 0.00413  | 1 |
| ENSG0000 | mucosal h | Inflamed | SLC16A11  | protein_cc | chr17 | 6944949  | 6947242  | - | 2041  | 22.64916 | 0        | 0.687386 | 0.18307  | 3.754764 | 0.000293 | 0.00413  | 1 |
| ENSG0000 | mucosal h | Inflamed | PARVB     | protein_cc | chr22 | 44395091 | 44568829 | + | 7330  | 821.1002 | 0        | -0.70949 | 0.188999 | -3.75391 | 0.000294 | 0.00414  | 1 |
| ENSG0000 | mucosal h | Inflamed | VTCN1     | protein_cc | chr1  | 1.18E+08 | 1.18E+08 | - | 3001  | 3.546539 | 0.587112 | -1.04328 | 0.277978 | -3.75313 | 0.000295 | 0.004149 | 1 |
| ENSG0000 | mucosal h | Inflamed | AC010525  | lincRNA    | chr19 | 56207251 | 56209196 | + | 537   | 33.59666 | 0.038186 | 0.902196 | 0.240445 | 3.752191 | 0.000296 | 0.004158 | 1 |
| ENSG0000 | mucosal h | Inflamed | RP11-284F | antisense  | chr12 | 20514666 | 20523196 | - | 525   | 3.381862 | 0.322196 | 0.596502 | 0.158976 | 3.752164 | 0.000296 | 0.004158 | 1 |
| ENSG0000 | mucosal h | Inflamed | ALOX5AP   | protein_cc | chr13 | 31309645 | 31338556 | + | 1344  | 519.6754 | 0        | -0.84412 | 0.225028 | -3.75117 | 0.000297 | 0.004171 | 1 |
| ENSG0000 | mucosal h | Inflamed | C3AR1     | protein_cc | chr12 | 8210898  | 8219067  | - | 2145  | 639.8043 | 0        | -0.75059 | 0.200129 | -3.75052 | 0.000297 | 0.004178 | 1 |
| ENSG0000 | mucosal h | Inflamed | C12orf45  | protein_cc | chr12 | 1.05E+08 | 1.05E+08 | + | 1424  | 233.8401 | 0        | -0.40988 | 0.109295 | -3.75024 | 0.000298 | 0.00418  | 1 |
| ENSG0000 | mucosal h | Inflamed | OVOL3     | protein_cc | chr19 | 36602104 | 36604613 | + | 879   | 3.673031 | 0.563246 | -0.91574 | 0.244205 | -3.7499  | 0.000298 | 0.004182 | 1 |
| ENSG0000 | mucosal h | Inflamed | MMP2      | protein_cc | chr16 | 55423612 | 55540603 | + | 4933  | 20124.88 | 0        | -0.95702 | 0.255243 | -3.74944 | 0.000298 | 0.004187 | 1 |
| ENSG0000 | mucosal h | Inflamed | RP11-569A | antisense  | chr1  | 2.03E+08 | 2.03E+08 | + | 314   | 8.217184 | 0.133652 | 0.800698 | 0.213578 | 3.748975 | 0.000299 | 0.004191 | 1 |
| ENSG0000 | mucosal h | Inflamed | ATP6V1C2  | protein_cc | chr2  | 10861775 | 10925236 | + | 3324  | 52.61337 | 0.01432  | 1.116493 | 0.297868 | 3.748282 | 0.0003   | 0.004199 | 1 |
| ENSG0000 | mucosal h | Inflamed | KRT23     | protein_cc | chr17 | 39078948 | 39093886 | - | 2902  | 44.39379 | 0.023866 | -1.49792 | 0.399727 | -3.74736 | 0.000301 | 0.004208 | 1 |
| ENSG0000 | mucosal h | Inflamed | TMEM158   | protein_cc | chr3  | 45265958 | 45267770 | - | 1813  | 535.1742 | 0.002387 | -1.07218 | 0.286126 | -3.74722 | 0.000301 | 0.004208 | 1 |
| ENSG0000 | mucosal h | Inflamed | CACNA1F   | protein_cc | chrX  | 49061523 | 49089833 | - | 6928  | 42.36516 | 0.002387 | 0.849526 | 0.226711 | 3.747186 | 0.000301 | 0.004208 | 1 |
| ENSG0000 | mucosal h | Inflamed | RP11-428K | antisense  | chr1  | 1.79E+08 | 1.79E+08 | - | 1980  | 30.62053 | 0.011933 | -0.72787 | 0.194251 | -3.74708 | 0.000301 | 0.004208 | 1 |
| ENSG0000 | mucosal h | Inflamed | DPF1      | protein_cc | chr19 | 38701646 | 38720354 | - | 4800  | 4.107399 | 0.334129 | -0.79816 | 0.213063 | -3.74611 | 0.000302 | 0.00422  | 1 |
| ENSG0000 | mucosal h | Inflamed | IKBIP     | protein_cc | chr12 | 99007183 | 99038891 | - | 4163  | 376.0167 | 0        | -0.78869 | 0.210603 | -3.74493 | 0.000303 | 0.004235 | 1 |
| ENSG0000 | mucosal h | Inflamed | SLC7A7    | protein_cc | chr14 | 23242431 | 23299029 | - | 5131  | 1306.236 | 0        | -0.59014 | 0.157657 | -3.74322 | 0.000305 | 0.004258 | 1 |
| ENSG0000 | mucosal h | Inflamed | RP11-71H  | lincRNA    | chr3  | 1.24E+08 | 1.24E+08 | + | 699   | 24.6253  | 0.01432  | 0.680479 | 0.181801 | 3.742987 | 0.000305 | 0.004259 | 1 |
| ENSG0000 | mucosal h | Inflamed | GPR176    | protein_cc | chr15 | 40091233 | 40213093 | - | 5119  | 577.0119 | 0        | -1.14629 | 0.306259 | -3.74287 | 0.000305 | 0.004259 | 1 |
| ENSG0000 | mucosal h | Inflamed | SYVN1     | protein_cc | chr11 | 64889252 | 64902004 | - | 5496  | 6039.236 | 0        | -0.51006 | 0.136299 | -3.74218 | 0.000306 | 0.004265 | 1 |
| ENSG0000 | mucosal h | Inflamed | FAM65B    | protein_cc | chr6  | 24797601 | 25042238 | - | 7697  | 867.4368 | 0        | -1.334   | 0.356477 | -3.74218 | 0.000306 | 0.004265 | 1 |
| ENSG0000 | mucosal h | Inflamed | HLA-C     | protein_cc | chr6  | 31236526 | 31239907 | - | 2507  | 62651.59 | 0        | -0.39637 | 0.105942 | -3.74139 | 0.000307 | 0.004274 | 1 |
| ENSG0000 | mucosal h | Inflamed | MICALCL   | protein_cc | chr11 | 12297627 | 12380691 | + | 3448  | 334.611  | 0.009547 | 0.932185 | 0.249195 | 3.740792 | 0.000308 | 0.004276 | 1 |
| ENSG0000 | mucosal h | Inflamed | PLOD1     | protein_cc | chr1  | 11994262 | 12035595 | + | 5320  | 4224.115 | 0        | -0.49412 | 0.132094 | -3.74067 | 0.000308 | 0.004276 | 1 |
| ENSG0000 | mucosal h | Inflamed | CD70      | protein_cc | chr19 | 6583194  | 6604114  | - | 1532  | 51.59666 | 0.026253 | -1.23747 | 0.330819 | -3.74063 | 0.000308 | 0.004276 | 1 |
| ENSG0000 | mucosal h | Inflamed | BGLAP     | protein_cc | chr1  | 1.56E+08 | 1.56E+08 | + | 1190  | 26.0716  | 0.009547 | 0.624889 | 0.167059 | 3.740536 | 0.000308 | 0.004276 | 1 |
| ENSG0000 | mucosal h | Inflamed | INTS4L1   | pseudoger  | chr7  | 64601603 | 64694600 | + | 2553  | 10.88544 | 0.186158 | 0.837403 | 0.223874 | 3.740517 | 0.000308 | 0.004276 | 1 |
| ENSG0000 | mucosal h | Inflamed | C2CD4B    | protein_cc | chr15 | 62455734 | 62457482 | - | 1579  | 238.3126 | 0        | -0.94012 | 0.251385 | -3.73976 | 0.000309 | 0.004285 | 1 |
| ENSG0000 | mucosal h | Inflamed | CTD-2005F | lincRNA    | chr11 | 86438397 | 86476307 | + | 503   | 1.174224 | 0.701671 | 0.437987 | 0.117153 | 3.738598 | 0.00031  | 0.0043   | 1 |
| ENSG0000 | mucosal h | Inflamed | RP4-575N  | antisense  | chr1  | 1.02E+08 | 1.02E+08 | - | 403   | 4.131265 | 0.295943 | -0.76276 | 0.204069 | -3.73777 | 0.000311 | 0.004307 | 1 |
| ENSG0000 | mucosal h | Inflamed | RP11-43N  | lincRNA    | chr12 | 68102827 | 68123255 | - | 3135  | 14.52267 | 0.286396 | 1.334416 | 0.357014 | 3.737708 | 0.000311 | 0.004307 | 1 |
| ENSG0000 | mucosal h | Inflamed | ATP2C2    | protein_cc | chr16 | 84402133 | 84497793 | + | 6693  | 4655.943 | 0        | 0.997137 | 0.266786 | 3.737587 | 0.000311 | 0.004307 | 1 |
| ENSG0000 | mucosal h | Inflamed | WNK2      | protein_cc | chr9  | 95947198 | 96082854 | + | 13198 | 5181.809 | 0        | 1.168488 | 0.312644 | 3.737437 | 0.000311 | 0.004307 | 1 |
| ENSG0000 | mucosal h | Inflamed | FAM78A    | protein_cc | chr9  | 1.34E+08 | 1.34E+08 | - | 5499  | 1000.589 | 0        | -0.73627 | 0.197001 | -3.73738 | 0.000311 | 0.004307 | 1 |

|          |           |          |            |            |       |          |          |   |       |          |          |          |          |          |          |          |   |
|----------|-----------|----------|------------|------------|-------|----------|----------|---|-------|----------|----------|----------|----------|----------|----------|----------|---|
| ENSG0000 | mucosal h | Inflamed | ACSM3      | protein_cc | chr16 | 20621565 | 20808903 | + | 5095  | 610.1599 | 0        | 0.94481  | 0.252884 | 3.736139 | 0.000313 | 0.004323 | 1 |
| ENSG0000 | mucosal h | Inflamed | IL2RB      | protein_cc | chr22 | 37521878 | 37571094 | - | 4700  | 1723.47  | 0        | -0.75274 | 0.201483 | -3.73599 | 0.000313 | 0.004323 | 1 |
| ENSG0000 | mucosal h | Inflamed | C1S        | protein_cc | chr12 | 7096351  | 7178336  | + | 6389  | 13977.73 | 0        | -0.91103 | 0.243884 | -3.7355  | 0.000313 | 0.004328 | 1 |
| ENSG0000 | mucosal h | Inflamed | MCF2L      | protein_cc | chr13 | 1.14E+08 | 1.14E+08 | + | 23204 | 3256.573 | 0        | 0.60184  | 0.161122 | 3.735293 | 0.000314 | 0.004329 | 1 |
| ENSG0000 | mucosal h | Inflamed | FAM160A2   | protein_cc | chr11 | 6232565  | 6255941  | - | 4736  | 5210.124 | 0        | 0.554126 | 0.148444 | 3.732893 | 0.000316 | 0.004362 | 1 |
| ENSG0000 | mucosal h | Inflamed | TMEM110    | protein_cc | chr3  | 52870235 | 52931612 | - | 5730  | 96.34368 | 0        | -0.2964  | 0.079403 | -3.73281 | 0.000316 | 0.004362 | 1 |
| ENSG0000 | mucosal h | Inflamed | SNRK-AS1   | antisense  | chr3  | 43391136 | 43393454 | - | 750   | 8.093079 | 0.183771 | 0.862539 | 0.231167 | 3.731234 | 0.000318 | 0.004384 | 1 |
| ENSG0000 | mucosal h | Inflamed | SHBG       | protein_cc | chr17 | 7517382  | 7536700  | + | 1812  | 10.3389  | 0.057279 | -0.68444 | 0.183451 | -3.73092 | 0.000318 | 0.004384 | 1 |
| ENSG0000 | mucosal h | Inflamed | RP11-305L  | lincRNA    | chr9  | 93968457 | 93972581 | - | 4125  | 8.828162 | 0.133652 | 0.772911 | 0.207164 | 3.730919 | 0.000318 | 0.004384 | 1 |
| ENSG0000 | mucosal h | Inflamed | CTD-2583F  | antisense  | chr16 | 12853139 | 12855019 | + | 927   | 2.787589 | 0.463007 | -0.70174 | 0.188118 | -3.73033 | 0.000319 | 0.004391 | 1 |
| ENSG0000 | mucosal h | Inflamed | MIR223     | miRNA      | chrX  | 65238712 | 65238821 | + | 110   | 11.34368 | 0.178998 | -1.1069  | 0.296763 | -3.72989 | 0.000319 | 0.004395 | 1 |
| ENSG0000 | mucosal h | Inflamed | RP6-65G2   | lincRNA    | chr14 | 71165415 | 71178870 | + | 602   | 8.121718 | 0.310263 | -1.09379 | 0.293295 | -3.72933 | 0.00032  | 0.004401 | 1 |
| ENSG0000 | mucosal h | Inflamed | IL17REL    | protein_cc | chr22 | 50432942 | 50451088 | - | 3696  | 378.1169 | 0.016706 | -1.53005 | 0.410312 | -3.72899 | 0.00032  | 0.004404 | 1 |
| ENSG0000 | mucosal h | Inflamed | ATP1A1     | protein_cc | chr1  | 1.17E+08 | 1.17E+08 | + | 7261  | 64364.04 | 0        | 0.613597 | 0.164644 | 3.726797 | 0.000323 | 0.004436 | 1 |
| ENSG0000 | mucosal h | Inflamed | DUSP14     | protein_cc | chr17 | 35849937 | 35873603 | + | 2499  | 180.315  | 0        | -0.81504 | 0.218708 | -3.7266  | 0.000323 | 0.004436 | 1 |
| ENSG0000 | mucosal h | Inflamed | ANKRD9     | protein_cc | chr14 | 1.03E+08 | 1.03E+08 | - | 2133  | 1612.012 | 0        | 0.584724 | 0.156953 | 3.725469 | 0.000324 | 0.004451 | 1 |
| ENSG0000 | mucosal h | Inflamed | TMEM106    | protein_cc | chr17 | 41363854 | 41372061 | + | 3578  | 681.6158 | 0        | -0.51322 | 0.137777 | -3.72504 | 0.000325 | 0.004456 | 1 |
| ENSG0000 | mucosal h | Inflamed | IGHV3-66   | IG_V_gene  | chr14 | 1.07E+08 | 1.07E+08 | - | 427   | 844.222  | 0.01432  | -1.51711 | 0.407486 | -3.72311 | 0.000327 | 0.004483 | 1 |
| ENSG0000 | mucosal h | Inflamed | RP11-712E  | pseudoger  | chr11 | 94878601 | 94879168 | + | 568   | 0.916468 | 0.754177 | 0.380903 | 0.102316 | 3.722805 | 0.000327 | 0.004486 | 1 |
| ENSG0000 | mucosal h | Inflamed | DEC2       | protein_cc | chr16 | 451826   | 462487   | + | 3947  | 960.5513 | 0        | 0.481295 | 0.12929  | 3.722585 | 0.000328 | 0.004487 | 1 |
| ENSG0000 | mucosal h | Inflamed | ADAMTS2    | protein_cc | chr5  | 1.79E+08 | 1.79E+08 | - | 7687  | 1856.076 | 0        | -1.12442 | 0.302064 | -3.72245 | 0.000328 | 0.004487 | 1 |
| ENSG0000 | mucosal h | Inflamed | RP11-598F  | lincRNA    | chr12 | 276022   | 291565   | - | 1184  | 16.65871 | 0.205251 | -1.27327 | 0.342193 | -3.7209  | 0.00033  | 0.004509 | 1 |
| ENSG0000 | mucosal h | Inflamed | MYO3B      | protein_cc | chr2  | 1.71E+08 | 1.72E+08 | + | 8236  | 19.01671 | 0.066826 | -0.8787  | 0.236173 | -3.72056 | 0.00033  | 0.004512 | 1 |
| ENSG0000 | mucosal h | Inflamed | RP11-417E  | lincRNA    | chr6  | 1.7E+08  | 1.7E+08  | - | 1054  | 5.023866 | 0.4821   | -1.05614 | 0.283926 | -3.71975 | 0.000331 | 0.004522 | 1 |
| ENSG0000 | mucosal h | Inflamed | DYRK3      | protein_cc | chr1  | 2.07E+08 | 2.07E+08 | + | 4218  | 108.642  | 0.002387 | -0.79599 | 0.21402  | -3.71923 | 0.000332 | 0.004528 | 1 |
| ENSG0000 | mucosal h | Inflamed | NEU4       | protein_cc | chr2  | 2.43E+08 | 2.43E+08 | + | 4818  | 1395.644 | 0        | 1.046001 | 0.281268 | 3.718879 | 0.000332 | 0.004531 | 1 |
| ENSG0000 | mucosal h | Inflamed | PRKAG2-A   | antisense  | chr7  | 1.52E+08 | 1.52E+08 | + | 1154  | 95.57279 | 0.002387 | 0.618456 | 0.166386 | 3.717001 | 0.000334 | 0.004557 | 1 |
| ENSG0000 | mucosal h | Inflamed | RGS14      | protein_cc | chr5  | 1.77E+08 | 1.77E+08 | + | 3797  | 869.2888 | 0        | -0.55748 | 0.149983 | -3.71692 | 0.000334 | 0.004557 | 1 |
| ENSG0000 | mucosal h | Inflamed | PPM1M      | protein_cc | chr3  | 52279841 | 52284613 | + | 3539  | 795.537  | 0        | -0.60215 | 0.162017 | -3.71661 | 0.000335 | 0.00456  | 1 |
| ENSG0000 | mucosal h | Inflamed | CAPN9      | protein_cc | chr1  | 2.31E+08 | 2.31E+08 | + | 2593  | 1232.888 | 0        | 1.231414 | 0.331366 | 3.716179 | 0.000335 | 0.004564 | 1 |
| ENSG0000 | mucosal h | Inflamed | RP11-701F  | lincRNA    | chr4  | 1.86E+08 | 1.86E+08 | - | 986   | 22.83771 | 0.393795 | -1.6168  | 0.435143 | -3.71556 | 0.000336 | 0.004571 | 1 |
| ENSG0000 | mucosal h | Inflamed | ZNF554     | protein_cc | chr19 | 2819872  | 2835771  | + | 4685  | 219.4702 | 0        | 0.487206 | 0.131149 | 3.714907 | 0.000337 | 0.004579 | 1 |
| ENSG0000 | mucosal h | Inflamed | RBM24      | protein_cc | chr6  | 17281577 | 17294106 | + | 3444  | 55.05251 | 0.026253 | 1.346706 | 0.362576 | 3.71427  | 0.000337 | 0.004586 | 1 |
| ENSG0000 | mucosal h | Inflamed | CTB-4116.1 | lincRNA    | chr17 | 8869213  | 8870387  | + | 402   | 11.28878 | 0.033413 | -0.70988 | 0.191133 | -3.71405 | 0.000338 | 0.004586 | 1 |
| ENSG0000 | mucosal h | Inflamed | PIM3       | protein_cc | chr22 | 50354161 | 50357728 | + | 2461  | 4781.933 | 0        | -0.53155 | 0.14312  | -3.71404 | 0.000338 | 0.004586 | 1 |
| ENSG0000 | mucosal h | Inflamed | MAP4K1     | protein_cc | chr19 | 39078281 | 39109522 | - | 3953  | 963.0072 | 0        | -0.79537 | 0.214225 | -3.71279 | 0.000339 | 0.004604 | 1 |
| ENSG0000 | mucosal h | Inflamed | PPFIBP2    | protein_cc | chr11 | 7534529  | 7678358  | + | 9617  | 1794.48  | 0        | 0.473558 | 0.127569 | 3.712182 | 0.00034  | 0.004611 | 1 |
| ENSG0000 | mucosal h | Inflamed | HINFP      | protein_cc | chr11 | 1.19E+08 | 1.19E+08 | + | 9834  | 883.1122 | 0        | 0.323853 | 0.087249 | 3.711813 | 0.00034  | 0.004614 | 1 |
| ENSG0000 | mucosal h | Inflamed | GIPC2      | protein_cc | chr1  | 78445226 | 78604133 | + | 3973  | 875.895  | 0        | 0.852075 | 0.229588 | 3.711313 | 0.000341 | 0.00462  | 1 |
| ENSG0000 | mucosal h | Inflamed | SRD5A3     | protein_cc | chr4  | 56212276 | 56239263 | + | 4420  | 1092.329 | 0        | -0.69788 | 0.188122 | -3.7097  | 0.000343 | 0.004644 | 1 |

|          |           |          |            |            |       |          |          |   |       |          |          |          |          |          |          |          |   |
|----------|-----------|----------|------------|------------|-------|----------|----------|---|-------|----------|----------|----------|----------|----------|----------|----------|---|
| ENSG0000 | mucosal h | Inflamed | RP11-3K16  | sense_intr | chr3  | 1.69E+08 | 1.69E+08 | - | 513   | 0.842482 | 0.799523 | 0.430728 | 0.116175 | 3.707571 | 0.000345 | 0.004676 | 1 |
| ENSG0000 | mucosal h | Inflamed | TFDP2      | protein_cc | chr3  | 1.42E+08 | 1.42E+08 | - | 11895 | 1008.019 | 0        | 0.535428 | 0.144469 | 3.706165 | 0.000347 | 0.004696 | 1 |
| ENSG0000 | mucosal h | Inflamed | BDNF-AS    | antisense  | chr11 | 27528385 | 27719721 | + | 3726  | 39.5895  | 0.00716  | 0.663744 | 0.179217 | 3.703578 | 0.00035  | 0.004736 | 1 |
| ENSG0000 | mucosal h | Inflamed | TPPP       | protein_cc | chr5  | 660883   | 693510   | - | 5116  | 506.5251 | 0.002387 | 0.986502 | 0.266375 | 3.703435 | 0.00035  | 0.004736 | 1 |
| ENSG0000 | mucosal h | Inflamed | SPR        | protein_cc | chr2  | 73114489 | 73119287 | + | 1480  | 1605.418 | 0        | 0.42675  | 0.115264 | 3.702354 | 0.000351 | 0.004751 | 1 |
| ENSG0000 | mucosal h | Inflamed | RP11-280C  | antisense  | chr1  | 1.65E+08 | 1.66E+08 | - | 4036  | 0.983294 | 0.749403 | 0.354884 | 0.095864 | 3.701952 | 0.000352 | 0.004755 | 1 |
| ENSG0000 | mucosal h | Inflamed | MT-RNR1    | Mt_rRNA    | chrM  | 648      | 1601     | + | 954   | 144218.2 | 0        | 0.767383 | 0.207314 | 3.701547 | 0.000352 | 0.004758 | 1 |
| ENSG0000 | mucosal h | Inflamed | RP4-680D   | antisense  | chr1  | 15892106 | 15892451 | - | 346   | 8.486874 | 0.090692 | 0.680678 | 0.183894 | 3.701463 | 0.000353 | 0.004758 | 1 |
| ENSG0000 | mucosal h | Inflamed | CLC        | protein_cc | chr19 | 40221890 | 40228668 | - | 635   | 186.3986 | 0.002387 | -1.31385 | 0.355043 | -3.70053 | 0.000354 | 0.004771 | 1 |
| ENSG0000 | mucosal h | Inflamed | C7orf41    | protein_cc | chr7  | 30174426 | 30202378 | + | 6532  | 580.8735 | 0        | 0.612852 | 0.165661 | 3.699426 | 0.000355 | 0.004787 | 1 |
| ENSG0000 | mucosal h | Inflamed | ACOT13     | protein_cc | chr6  | 24667263 | 24705293 | + | 4394  | 859.2864 | 0        | 0.534174 | 0.144402 | 3.699215 | 0.000355 | 0.004788 | 1 |
| ENSG0000 | mucosal h | Inflamed | AUTS2      | protein_cc | chr7  | 69063905 | 70258054 | + | 10418 | 1669.936 | 0        | 0.742947 | 0.200858 | 3.698863 | 0.000356 | 0.004789 | 1 |
| ENSG0000 | mucosal h | Inflamed | RHBDF2     | protein_cc | chr17 | 74466973 | 74497872 | - | 6927  | 1843.814 | 0        | -0.70707 | 0.191161 | -3.69884 | 0.000356 | 0.004789 | 1 |
| ENSG0000 | mucosal h | Inflamed | ZYG11A     | protein_cc | chr1  | 53308183 | 53360670 | + | 4694  | 15.58234 | 0.107399 | -0.96921 | 0.262069 | -3.69829 | 0.000356 | 0.004796 | 1 |
| ENSG0000 | mucosal h | Inflamed | LYZ        | protein_cc | chr12 | 69742121 | 69748014 | + | 1764  | 17476.03 | 0        | -0.70971 | 0.191981 | -3.69677 | 0.000358 | 0.004819 | 1 |
| ENSG0000 | mucosal h | Inflamed | NUAK2      | protein_cc | chr1  | 2.05E+08 | 2.05E+08 | - | 3405  | 1849.155 | 0        | 0.563571 | 0.15247  | 3.696283 | 0.000359 | 0.004824 | 1 |
| ENSG0000 | mucosal h | Inflamed | RP1-191J1  | antisense  | chr6  | 1.08E+08 | 1.08E+08 | + | 2574  | 15.63246 | 0.02864  | -0.67251 | 0.181965 | -3.69581 | 0.00036  | 0.00483  | 1 |
| ENSG0000 | mucosal h | Inflamed | hsa-mir-67 | pseudoger  | chr1  | 566454   | 567996   | + | 1543  | 65555.85 | 0        | 0.647396 | 0.175183 | 3.695545 | 0.00036  | 0.004832 | 1 |
| ENSG0000 | mucosal h | Inflamed | U3         | lincRNA    | chr18 | 24267585 | 24283602 | - | 2598  | 12.73508 | 0.150358 | 0.925792 | 0.250557 | 3.694933 | 0.000361 | 0.004837 | 1 |
| ENSG0000 | mucosal h | Inflamed | CTB-114C7  | lincRNA    | chr5  | 1.7E+08  | 1.7E+08  | - | 2182  | 10.54177 | 0.21957  | -1.16664 | 0.315743 | -3.69492 | 0.000361 | 0.004837 | 1 |
| ENSG0000 | mucosal h | Inflamed | CTD-2126f  | antisense  | chr19 | 50546453 | 50554319 | - | 711   | 3.379475 | 0.336516 | 0.670873 | 0.181596 | 3.694324 | 0.000361 | 0.004845 | 1 |
| ENSG0000 | mucosal h | Inflamed | FMNL1      | protein_cc | chr17 | 43298811 | 43324687 | + | 7563  | 2862.728 | 0        | -0.92895 | 0.251463 | -3.69418 | 0.000362 | 0.004845 | 1 |
| ENSG0000 | mucosal h | Inflamed | LIPC       | protein_cc | chr15 | 58702768 | 58861151 | + | 4293  | 50.89737 | 0.002387 | 0.890528 | 0.241116 | 3.693356 | 0.000363 | 0.004856 | 1 |
| ENSG0000 | mucosal h | Inflamed | CES2       | protein_cc | chr16 | 66968347 | 66978999 | + | 5343  | 21055.9  | 0        | 0.848652 | 0.229806 | 3.6929   | 0.000363 | 0.004861 | 1 |
| ENSG0000 | mucosal h | Inflamed | ELTD1      | protein_cc | chr1  | 79355449 | 79472403 | - | 3527  | 392.599  | 0.002387 | -0.9663  | 0.261787 | -3.69115 | 0.000365 | 0.004888 | 1 |
| ENSG0000 | mucosal h | Inflamed | POLR2H     | protein_cc | chr3  | 1.84E+08 | 1.84E+08 | + | 3146  | 1840.747 | 0        | 0.363943 | 0.098629 | 3.690031 | 0.000367 | 0.004905 | 1 |
| ENSG0000 | mucosal h | Inflamed | RP11-300J  | lincRNA    | chr14 | 88490894 | 88563276 | + | 2120  | 3.620525 | 0.377088 | -0.6902  | 0.187052 | -3.68987 | 0.000367 | 0.004905 | 1 |
| ENSG0000 | mucosal h | Inflamed | NEO1       | protein_cc | chr15 | 73344051 | 73597547 | + | 8117  | 9096.487 | 0        | 0.720693 | 0.195364 | 3.688972 | 0.000368 | 0.004918 | 1 |
| ENSG0000 | mucosal h | Inflamed | KIFC3      | protein_cc | chr16 | 57792129 | 57896957 | - | 7552  | 987.568  | 0        | -0.83635 | 0.226728 | -3.68876 | 0.000368 | 0.004919 | 1 |
| ENSG0000 | mucosal h | Inflamed | IGHA2      | IG_C_gene  | chr14 | 1.06E+08 | 1.06E+08 | - | 1071  | 355453.9 | 0        | -1.11317 | 0.30181  | -3.68831 | 0.000369 | 0.004924 | 1 |
| ENSG0000 | mucosal h | Inflamed | RP11-61A1  | lincRNA    | chr16 | 66785655 | 66788643 | + | 2894  | 9.031026 | 0.069212 | 0.671186 | 0.181984 | 3.68815  | 0.000369 | 0.004924 | 1 |
| ENSG0000 | mucosal h | Inflamed | RP11-432J  | lincRNA    | chr10 | 1.34E+08 | 1.34E+08 | + | 297   | 1.398568 | 0.639618 | 0.460348 | 0.124848 | 3.68726  | 0.00037  | 0.004935 | 1 |
| ENSG0000 | mucosal h | Inflamed | CALR       | protein_cc | chr19 | 13049392 | 13055303 | + | 2714  | 35812.37 | 0        | -0.35706 | 0.096839 | -3.68719 | 0.00037  | 0.004935 | 1 |
| ENSG0000 | mucosal h | Inflamed | GBP1       | protein_cc | chr1  | 89518002 | 89531043 | - | 4992  | 2298.22  | 0        | -1.03239 | 0.280005 | -3.68704 | 0.000371 | 0.004936 | 1 |
| ENSG0000 | mucosal h | Inflamed | APBA2      | protein_cc | chr15 | 29129629 | 29410518 | + | 6869  | 418      | 0        | -0.82839 | 0.224824 | -3.68461 | 0.000374 | 0.004975 | 1 |
| ENSG0000 | mucosal h | Inflamed | IGHD       | IG_C_gene  | chr14 | 1.06E+08 | 1.06E+08 | - | 1678  | 660.8711 | 0.00716  | -1.77738 | 0.48243  | -3.68422 | 0.000374 | 0.004979 | 1 |
| ENSG0000 | mucosal h | Inflamed | hsa-mir-51 | miRNA      | chr14 | 1.07E+08 | 1.07E+08 | - | 115   | 4.198091 | 0.405728 | -0.80989 | 0.219847 | -3.68386 | 0.000375 | 0.004982 | 1 |
| ENSG0000 | mucosal h | Inflamed | AL122127.  | miRNA      | chr14 | 1.06E+08 | 1.06E+08 | - | 60    | 10.20048 | 0.193317 | -1.02096 | 0.277152 | -3.68376 | 0.000375 | 0.004982 | 1 |
| ENSG0000 | mucosal h | Inflamed | CHST11     | protein_cc | chr12 | 1.05E+08 | 1.05E+08 | + | 6492  | 1171.229 | 0        | -0.82764 | 0.224745 | -3.68258 | 0.000376 | 0.004999 | 1 |
| ENSG0000 | mucosal h | Inflamed | PNPLA7     | protein_cc | chr9  | 1.4E+08  | 1.4E+08  | - | 8971  | 673.8234 | 0        | 0.671446 | 0.182356 | 3.682054 | 0.000377 | 0.005006 | 1 |

|          |           |          |           |            |       |          |          |   |       |          |          |          |          |          |          |          |   |
|----------|-----------|----------|-----------|------------|-------|----------|----------|---|-------|----------|----------|----------|----------|----------|----------|----------|---|
| ENSG0000 | mucosal h | Inflamed | COL2A1    | protein_cc | chr12 | 48366748 | 48398269 | - | 6596  | 50.25537 | 0.038186 | 1.362276 | 0.37     | 3.681829 | 0.000377 | 0.005007 | 1 |
| ENSG0000 | mucosal h | Inflamed | ATPAF1    | protein_cc | chr1  | 47098409 | 47139539 | - | 5654  | 1323.2   | 0        | 0.339274 | 0.09219  | 3.680171 | 0.000379 | 0.005033 | 1 |
| ENSG0000 | mucosal h | Inflamed | LINC00526 | lincRNA    | chr18 | 5236723  | 5238597  | - | 1875  | 183.3986 | 0        | 0.554756 | 0.15078  | 3.679246 | 0.000381 | 0.005047 | 1 |
| ENSG0000 | mucosal h | Inflamed | TFAP2C    | protein_cc | chr20 | 55204358 | 55214339 | + | 3112  | 138.8807 | 0.009547 | -1.09631 | 0.298033 | -3.6785  | 0.000382 | 0.005057 | 1 |
| ENSG0000 | mucosal h | Inflamed | HRH4      | protein_cc | chr18 | 22040593 | 22059921 | + | 3668  | 23.34368 | 0.062053 | -1.10502 | 0.300478 | -3.67753 | 0.000383 | 0.005072 | 1 |
| ENSG0000 | mucosal h | Inflamed | RP11-2437 | lincRNA    | chr16 | 9449445  | 9501950  | + | 5298  | 12.84726 | 0.171838 | 1.067994 | 0.290497 | 3.676441 | 0.000384 | 0.005085 | 1 |
| ENSG0000 | mucosal h | Inflamed | SOX18     | protein_cc | chr20 | 62679076 | 62680994 | - | 1723  | 723.3771 | 0        | -1.00787 | 0.274151 | -3.67631 | 0.000385 | 0.005085 | 1 |
| ENSG0000 | mucosal h | Inflamed | UBD       | protein_cc | chr6  | 29523292 | 29527702 | - | 1087  | 64.54893 | 0.090692 | -1.33581 | 0.363369 | -3.67617 | 0.000385 | 0.005085 | 1 |
| ENSG0000 | mucosal h | Inflamed | TACC2     | protein_cc | chr10 | 1.24E+08 | 1.24E+08 | + | 18835 | 4073.998 | 0        | 0.640332 | 0.174185 | 3.676168 | 0.000385 | 0.005085 | 1 |
| ENSG0000 | mucosal h | Inflamed | LILRA6    | protein_cc | chr19 | 54720737 | 54746649 | - | 4190  | 337.8091 | 0        | -1.20966 | 0.329074 | -3.67594 | 0.000385 | 0.005087 | 1 |
| ENSG0000 | mucosal h | Inflamed | RP11-4511 | protein_cc | chr10 | 1.12E+08 | 1.12E+08 | - | 1663  | 15.21718 | 0.019093 | 0.739519 | 0.201188 | 3.675763 | 0.000385 | 0.005087 | 1 |
| ENSG0000 | mucosal h | Inflamed | RP11-363J | lincRNA    | chr14 | 69649737 | 69680809 | - | 2364  | 4.420048 | 0.193317 | 0.586564 | 0.159584 | 3.675582 | 0.000386 | 0.005088 | 1 |
| ENSG0000 | mucosal h | Inflamed | RNA5SP43  | rRNA       | chr17 | 3960050  | 3960170  | - | 121   | 2.849642 | 0.424821 | 0.641779 | 0.174617 | 3.675344 | 0.000386 | 0.00509  | 1 |
| ENSG0000 | mucosal h | Inflamed | SLC7A4    | protein_cc | chr22 | 21383007 | 21387129 | - | 2447  | 156.284  | 0        | 1.05842  | 0.288006 | 3.674993 | 0.000386 | 0.005091 | 1 |
| ENSG0000 | mucosal h | Inflamed | CTC-297N  | lincRNA    | chr17 | 10575791 | 10579323 | - | 3533  | 468.3461 | 0        | 0.648296 | 0.176416 | 3.67481  | 0.000387 | 0.005091 | 1 |
| ENSG0000 | mucosal h | Inflamed | ARHGEF9   | protein_cc | chrX  | 62854847 | 63005426 | - | 6673  | 1037.296 | 0        | 0.567899 | 0.154542 | 3.674711 | 0.000387 | 0.005091 | 1 |
| ENSG0000 | mucosal h | Inflamed | TCL1A     | protein_cc | chr14 | 96176304 | 96180533 | - | 2236  | 197.2243 | 0.140811 | -2.06602 | 0.562229 | -3.67469 | 0.000387 | 0.005091 | 1 |
| ENSG0000 | mucosal h | Inflamed | FAM155A   | protein_cc | chr13 | 1.08E+08 | 1.09E+08 | - | 3478  | 55.63484 | 0.016706 | -1.0236  | 0.278574 | -3.67444 | 0.000387 | 0.005093 | 1 |
| ENSG0000 | mucosal h | Inflamed | CEACAM2   | protein_cc | chr19 | 42055886 | 42093197 | + | 1926  | 104.4964 | 0.009547 | -0.76566 | 0.208387 | -3.67424 | 0.000387 | 0.005094 | 1 |
| ENSG0000 | mucosal h | Inflamed | SFRP2     | protein_cc | chr4  | 1.55E+08 | 1.55E+08 | - | 2032  | 408.9332 | 0.016706 | -1.96028 | 0.53364  | -3.67342 | 0.000388 | 0.005106 | 1 |
| ENSG0000 | mucosal h | Inflamed | RP11-363I | antisense  | chr2  | 97193677 | 97198043 | - | 440   | 1.360382 | 0.680191 | -0.5105  | 0.138989 | -3.67299 | 0.000389 | 0.005111 | 1 |
| ENSG0000 | mucosal h | Inflamed | ANKRD63   | protein_cc | chr15 | 40573645 | 40574787 | - | 1143  | 1.279236 | 0.680191 | 0.478015 | 0.13015  | 3.672784 | 0.000389 | 0.005112 | 1 |
| ENSG0000 | mucosal h | Inflamed | AC091132  | antisense  | chr17 | 43530210 | 43541431 | + | 769   | 19.1074  | 0.064439 | -0.98232 | 0.267492 | -3.67235 | 0.00039  | 0.005117 | 1 |
| ENSG0000 | mucosal h | Inflamed | PTN       | protein_cc | chr7  | 1.37E+08 | 1.37E+08 | - | 1713  | 152.3198 | 0        | 0.944262 | 0.257167 | 3.671782 | 0.000391 | 0.005124 | 1 |
| ENSG0000 | mucosal h | Inflamed | RRAS2     | protein_cc | chr11 | 14299472 | 14386052 | - | 3467  | 689.8138 | 0        | 0.428005 | 0.116583 | 3.671263 | 0.000391 | 0.005131 | 1 |
| ENSG0000 | mucosal h | Inflamed | GPR183    | protein_cc | chr13 | 99946784 | 99959659 | - | 1700  | 500.3126 | 0        | -0.83913 | 0.2286   | -3.67071 | 0.000392 | 0.005138 | 1 |
| ENSG0000 | mucosal h | Inflamed | F2RL2     | protein_cc | chr5  | 75911307 | 75919259 | - | 3429  | 349.2053 | 0.00716  | -1.08866 | 0.296591 | -3.67057 | 0.000392 | 0.005138 | 1 |
| ENSG0000 | mucosal h | Inflamed | RP3-388E2 | antisense  | chr6  | 1.36E+08 | 1.36E+08 | + | 577   | 2.164678 | 0.494033 | 0.508668 | 0.138586 | 3.670421 | 0.000392 | 0.005138 | 1 |
| ENSG0000 | mucosal h | Inflamed | MAP1LC3C  | protein_cc | chr1  | 2.42E+08 | 2.42E+08 | - | 1182  | 4.73031  | 0.245823 | -0.69998 | 0.190726 | -3.67007 | 0.000393 | 0.005142 | 1 |
| ENSG0000 | mucosal h | Inflamed | CH17-132f | protein_cc | chr2  | 90458201 | 90458671 | + | 347   | 4.176611 | 0.460621 | -1.09973 | 0.299709 | -3.66932 | 0.000394 | 0.005152 | 1 |
| ENSG0000 | mucosal h | Inflamed | FMN2      | protein_cc | chr1  | 2.4E+08  | 2.41E+08 | + | 9691  | 16.89737 | 0.124105 | 1.205746 | 0.328618 | 3.66914  | 0.000394 | 0.005153 | 1 |
| ENSG0000 | mucosal h | Inflamed | CTD-2547f | antisense  | chr11 | 76666461 | 76689663 | - | 568   | 45.72792 | 0.011933 | 0.932333 | 0.254158 | 3.668321 | 0.000395 | 0.005165 | 1 |
| ENSG0000 | mucosal h | Inflamed | NMNAT3    | protein_cc | chr3  | 1.39E+08 | 1.39E+08 | - | 3451  | 138.5227 | 0        | 0.60335  | 0.164498 | 3.667824 | 0.000396 | 0.005169 | 1 |
| ENSG0000 | mucosal h | Inflamed | SLC7A11   | protein_cc | chr4  | 1.39E+08 | 1.39E+08 | - | 9645  | 414.6754 | 0        | -1.16827 | 0.318519 | -3.66781 | 0.000396 | 0.005169 | 1 |
| ENSG0000 | mucosal h | Inflamed | HOXD1     | protein_cc | chr2  | 1.77E+08 | 1.77E+08 | + | 2028  | 230.5131 | 0        | 0.685918 | 0.18702  | 3.66761  | 0.000396 | 0.00517  | 1 |
| ENSG0000 | mucosal h | Inflamed | GPR110    | protein_cc | chr6  | 46965440 | 47010099 | - | 12401 | 338.3365 | 0.01432  | -1.75401 | 0.478297 | -3.66719 | 0.000397 | 0.005175 | 1 |
| ENSG0000 | mucosal h | Inflamed | SLC9A2    | protein_cc | chr2  | 1.03E+08 | 1.03E+08 | + | 5984  | 2460.513 | 0.004773 | 1.339934 | 0.365408 | 3.666955 | 0.000397 | 0.005176 | 1 |
| ENSG0000 | mucosal h | Inflamed | STARD13-7 | processed  | chr13 | 33845516 | 33855471 | + | 3436  | 3.563246 | 0.353222 | 0.710459 | 0.193765 | 3.666606 | 0.000398 | 0.00518  | 1 |
| ENSG0000 | mucosal h | Inflamed | SLC6A7    | protein_cc | chr5  | 1.5E+08  | 1.5E+08  | + | 4391  | 397.0263 | 0        | 1.052982 | 0.287235 | 3.665925 | 0.000399 | 0.005189 | 1 |
| ENSG0000 | mucosal h | Inflamed | WDFY4     | protein_cc | chr10 | 49892921 | 50191001 | + | 13692 | 1690.284 | 0        | -0.90535 | 0.246973 | -3.6658  | 0.000399 | 0.005189 | 1 |

|          |           |          |           |                  |          |          |   |       |          |          |          |          |          |          |          |   |
|----------|-----------|----------|-----------|------------------|----------|----------|---|-------|----------|----------|----------|----------|----------|----------|----------|---|
| ENSG0000 | mucosal h | Inflamed | SHROOM1   | protein_cc chr5  | 1.32E+08 | 1.32E+08 | - | 4329  | 2657.449 | 0        | 0.581791 | 0.158732 | 3.665247 | 0.000399 | 0.005197 | 1 |
| ENSG0000 | mucosal h | Inflamed | HVCN1     | protein_cc chr12 | 1.11E+08 | 1.11E+08 | - | 3595  | 473.9236 | 0        | -0.8127  | 0.221743 | -3.66504 | 0.0004   | 0.005198 | 1 |
| ENSG0000 | mucosal h | Inflamed | VNN1      | protein_cc chr6  | 1.33E+08 | 1.33E+08 | - | 3106  | 994.7494 | 0        | -1.59674 | 0.435702 | -3.66476 | 0.0004   | 0.0052   | 1 |
| ENSG0000 | mucosal h | Inflamed | LMAN2     | protein_cc chr5  | 1.77E+08 | 1.77E+08 | - | 2357  | 6333.258 | 0        | -0.24207 | 0.066058 | -3.66452 | 0.0004   | 0.005202 | 1 |
| ENSG0000 | mucosal h | Inflamed | TRIB2     | protein_cc chr2  | 12857015 | 12882860 | + | 4588  | 1697.695 | 0        | -0.9579  | 0.261448 | -3.66381 | 0.000401 | 0.005212 | 1 |
| ENSG0000 | mucosal h | Inflamed | RAB3B     | protein_cc chr1  | 52373628 | 52456436 | - | 12844 | 487.7876 | 0        | 0.886519 | 0.242019 | 3.663009 | 0.000403 | 0.005224 | 1 |
| ENSG0000 | mucosal h | Inflamed | PWWP2B    | protein_cc chr10 | 1.34E+08 | 1.34E+08 | + | 2651  | 1759.687 | 0        | 0.456826 | 0.124721 | 3.662775 | 0.000403 | 0.005225 | 1 |
| ENSG0000 | mucosal h | Inflamed | AC074363  | lincRNA chr2     | 1.68E+08 | 1.68E+08 | + | 462   | 9.823389 | 0.150358 | 0.853778 | 0.233187 | 3.66135  | 0.000405 | 0.005248 | 1 |
| ENSG0000 | mucosal h | Inflamed | CRYBB1    | protein_cc chr22 | 26995242 | 27014052 | - | 1102  | 13.45107 | 0.016706 | -0.71637 | 0.195662 | -3.66124 | 0.000405 | 0.005248 | 1 |
| ENSG0000 | mucosal h | Inflamed | MFAP2     | protein_cc chr1  | 17300997 | 17307330 | - | 2915  | 247.2029 | 0.002387 | -0.99622 | 0.272143 | -3.66066 | 0.000406 | 0.005256 | 1 |
| ENSG0000 | mucosal h | Inflamed | WSCD1     | protein_cc chr17 | 5675554  | 6027747  | + | 9082  | 1431.129 | 0        | 1.054551 | 0.288096 | 3.660411 | 0.000406 | 0.005258 | 1 |
| ENSG0000 | mucosal h | Inflamed | MAGIX     | protein_cc chrX  | 49019061 | 49024822 | + | 4948  | 242.222  | 0        | 0.698859 | 0.190933 | 3.660236 | 0.000406 | 0.005258 | 1 |
| ENSG0000 | mucosal h | Inflamed | RP11-5101 | sense_intr chr1  | 2.02E+08 | 2.02E+08 | + | 987   | 56.3222  | 0.02864  | 1.042914 | 0.284956 | 3.65991  | 0.000407 | 0.005261 | 1 |
| ENSG0000 | mucosal h | Inflamed | FAM49A    | protein_cc chr2  | 16730727 | 16847599 | - | 5448  | 581.0955 | 0        | -0.84998 | 0.232276 | -3.65934 | 0.000408 | 0.005269 | 1 |
| ENSG0000 | mucosal h | Inflamed | MBOAT1    | protein_cc chr6  | 20100935 | 20212670 | - | 3287  | 1935.103 | 0        | 0.683648 | 0.18684  | 3.658995 | 0.000408 | 0.005273 | 1 |
| ENSG0000 | mucosal h | Inflamed | ARHGEF26  | protein_cc chr3  | 1.54E+08 | 1.54E+08 | + | 5489  | 182.1718 | 0.004773 | 0.761351 | 0.208085 | 3.658849 | 0.000408 | 0.005273 | 1 |
| ENSG0000 | mucosal h | Inflamed | NHSL1     | protein_cc chr6  | 1.39E+08 | 1.39E+08 | - | 8741  | 4314.566 | 0        | 0.816916 | 0.223321 | 3.65804  | 0.000409 | 0.005285 | 1 |
| ENSG0000 | mucosal h | Inflamed | CITF22-92 | lincRNA chr22    | 46409486 | 46411378 | + | 1207  | 47.40095 | 0        | 0.426992 | 0.116738 | 3.657709 | 0.00041  | 0.005288 | 1 |
| ENSG0000 | mucosal h | Inflamed | CPT1A     | protein_cc chr11 | 68522088 | 68611878 | - | 6565  | 11477.06 | 0        | 0.594056 | 0.162433 | 3.657239 | 0.000411 | 0.005292 | 1 |
| ENSG0000 | mucosal h | Inflamed | RN7SL541  | misc_RNA chr5    | 1.34E+08 | 1.34E+08 | + | 285   | 8.52506  | 0.186158 | 0.807176 | 0.220709 | 3.657196 | 0.000411 | 0.005292 | 1 |
| ENSG0000 | mucosal h | Inflamed | AP002954  | antisense chr11  | 1.19E+08 | 1.19E+08 | + | 1388  | 26.78043 | 0.081146 | 1.023963 | 0.28021  | 3.654268 | 0.000415 | 0.005343 | 1 |
| ENSG0000 | mucosal h | Inflamed | ANXA5     | protein_cc chr4  | 1.23E+08 | 1.23E+08 | - | 3034  | 5400.561 | 0        | -0.60876 | 0.166633 | -3.65331 | 0.000416 | 0.005358 | 1 |
| ENSG0000 | mucosal h | Inflamed | MLK4      | protein_cc chr1  | 2.33E+08 | 2.34E+08 | + | 7916  | 700.6396 | 0        | 0.813828 | 0.222795 | 3.652803 | 0.000417 | 0.005365 | 1 |
| ENSG0000 | mucosal h | Inflamed | ATP9A     | protein_cc chr20 | 50213053 | 50385173 | - | 8317  | 5574.496 | 0        | 0.696444 | 0.190771 | 3.650672 | 0.00042  | 0.005402 | 1 |
| ENSG0000 | mucosal h | Inflamed | ADAM12    | protein_cc chr10 | 1.28E+08 | 1.28E+08 | - | 9860  | 461.148  | 0.00716  | -1.51069 | 0.413841 | -3.65041 | 0.00042  | 0.005404 | 1 |
| ENSG0000 | mucosal h | Inflamed | SGK2      | protein_cc chr20 | 42187608 | 42216877 | + | 3465  | 2140.788 | 0        | 1.1437   | 0.313322 | 3.650238 | 0.000421 | 0.005404 | 1 |
| ENSG0000 | mucosal h | Inflamed | SLC20A2   | protein_cc chr8  | 42273993 | 42397069 | - | 6641  | 3112.487 | 0        | 0.572646 | 0.156895 | 3.649864 | 0.000421 | 0.005409 | 1 |
| ENSG0000 | mucosal h | Inflamed | PHGDH     | protein_cc chr1  | 1.2E+08  | 1.2E+08  | + | 5622  | 488.2745 | 0        | -0.84616 | 0.231872 | -3.64924 | 0.000422 | 0.005418 | 1 |
| ENSG0000 | mucosal h | Inflamed | RP11-98G  | lincRNA chr1     | 1.56E+08 | 1.56E+08 | - | 990   | 1.878282 | 0.551313 | 0.501858 | 0.137542 | 3.648757 | 0.000423 | 0.005424 | 1 |
| ENSG0000 | mucosal h | Inflamed | AC092653  | pseudoger chr2   | 73927754 | 73928432 | - | 679   | 30.77566 | 0.054893 | 0.95624  | 0.262109 | 3.648255 | 0.000423 | 0.005431 | 1 |
| ENSG0000 | mucosal h | Inflamed | SEMG2     | protein_cc chr20 | 43849941 | 43853099 | + | 2051  | 5.98568  | 0.577566 | -1.20122 | 0.329431 | -3.64636 | 0.000426 | 0.005463 | 1 |
| ENSG0000 | mucosal h | Inflamed | KIAA1737  | protein_cc chr14 | 77564440 | 77583630 | + | 5300  | 1206.358 | 0        | 0.765    | 0.209818 | 3.646011 | 0.000427 | 0.005465 | 1 |
| ENSG0000 | mucosal h | Inflamed | RP11-395F | antisense chr9   | 1.31E+08 | 1.31E+08 | - | 3958  | 2029.757 | 0        | 0.753437 | 0.206649 | 3.645968 | 0.000427 | 0.005465 | 1 |
| ENSG0000 | mucosal h | Inflamed | MLLT3     | protein_cc chr9  | 20341663 | 20622542 | - | 8129  | 921.2936 | 0        | 0.665457 | 0.182532 | 3.645692 | 0.000427 | 0.005468 | 1 |
| ENSG0000 | mucosal h | Inflamed | RUNX3     | protein_cc chr1  | 25226002 | 25291612 | - | 4605  | 1614.346 | 0        | -0.70839 | 0.194341 | -3.64508 | 0.000428 | 0.005477 | 1 |
| ENSG0000 | mucosal h | Inflamed | CSTF3-AS1 | antisense chr11  | 33183203 | 33213144 | + | 2062  | 3.389021 | 0.295943 | -0.63191 | 0.173365 | -3.64495 | 0.000428 | 0.005477 | 1 |
| ENSG0000 | mucosal h | Inflamed | HLA-DMB   | protein_cc chr6  | 32902406 | 32908847 | - | 4655  | 2439.411 | 0        | -0.59334 | 0.162794 | -3.64475 | 0.000429 | 0.005477 | 1 |
| ENSG0000 | mucosal h | Inflamed | GRAP      | protein_cc chr17 | 18923986 | 18950950 | - | 3107  | 377.1122 | 0        | -0.84642 | 0.232263 | -3.64422 | 0.000429 | 0.005485 | 1 |
| ENSG0000 | mucosal h | Inflamed | GRK6      | protein_cc chr5  | 1.77E+08 | 1.77E+08 | + | 4355  | 2815.265 | 0        | -0.37378 | 0.102592 | -3.64336 | 0.000431 | 0.005496 | 1 |
| ENSG0000 | mucosal h | Inflamed | DDOST     | protein_cc chr1  | 20978270 | 20988000 | - | 2674  | 9907.728 | 0        | -0.27611 | 0.075786 | -3.64331 | 0.000431 | 0.005496 | 1 |

|          |           |          |           |            |       |          |          |   |       |          |          |          |          |          |          |          |   |
|----------|-----------|----------|-----------|------------|-------|----------|----------|---|-------|----------|----------|----------|----------|----------|----------|----------|---|
| ENSG0000 | mucosal h | Inflamed | VANGL2    | protein_cc | chr1  | 1.6E+08  | 1.6E+08  | + | 5340  | 763.4081 | 0.002387 | 0.87814  | 0.241036 | 3.643191 | 0.000431 | 0.005496 | 1 |
| ENSG0000 | mucosal h | Inflamed | MAP1LC3A  | protein_cc | chr20 | 33134658 | 33148149 | + | 1762  | 914.1169 | 0        | 0.362901 | 0.099616 | 3.64298  | 0.000431 | 0.005498 | 1 |
| ENSG0000 | mucosal h | Inflamed | B3GNT9    | protein_cc | chr16 | 67182008 | 67185117 | - | 2917  | 632.5442 | 0        | -0.58355 | 0.16021  | -3.64242 | 0.000432 | 0.005504 | 1 |
| ENSG0000 | mucosal h | Inflamed | RP11-175k | lincRNA    | chr5  | 1.59E+08 | 1.59E+08 | + | 3214  | 22.50358 | 0.023866 | -0.91582 | 0.251443 | -3.64226 | 0.000432 | 0.005504 | 1 |
| ENSG0000 | mucosal h | Inflamed | RP11-472E | pseudoger  | chr4  | 39481875 | 39483525 | + | 1651  | 6.513126 | 0.105012 | 0.57531  | 0.157957 | 3.6422   | 0.000432 | 0.005504 | 1 |
| ENSG0000 | mucosal h | Inflamed | SERPINH1  | protein_cc | chr11 | 75273101 | 75283828 | + | 4914  | 5761.453 | 0        | -0.62979 | 0.172928 | -3.64194 | 0.000433 | 0.005506 | 1 |
| ENSG0000 | mucosal h | Inflamed | DGKD      | protein_cc | chr2  | 2.34E+08 | 2.34E+08 | + | 9441  | 4097.604 | 0        | 0.575366 | 0.157994 | 3.641689 | 0.000433 | 0.005506 | 1 |
| ENSG0000 | mucosal h | Inflamed | IGHJ2P    | IG_J_pseu  | chr14 | 1.06E+08 | 1.06E+08 | - | 60    | 8.384248 | 0.202864 | -0.93573 | 0.25695  | -3.64167 | 0.000433 | 0.005506 | 1 |
| ENSG0000 | mucosal h | Inflamed | NQO2      | protein_cc | chr6  | 2988221  | 3019996  | + | 2451  | 487.8544 | 0        | -0.51169 | 0.140524 | -3.64131 | 0.000434 | 0.00551  | 1 |
| ENSG0000 | mucosal h | Inflamed | ADAM1A    | pseudoger  | chr12 | 1.12E+08 | 1.12E+08 | + | 2976  | 267.3604 | 0        | 1.051141 | 0.288694 | 3.641017 | 0.000434 | 0.005513 | 1 |
| ENSG0000 | mucosal h | Inflamed | B3GNT7    | protein_cc | chr2  | 2.32E+08 | 2.32E+08 | + | 3806  | 9072.542 | 0        | 1.298021 | 0.356574 | 3.640252 | 0.000435 | 0.005525 | 1 |
| ENSG0000 | mucosal h | Inflamed | IL17F     | protein_cc | chr6  | 52101479 | 52109335 | - | 1067  | 9.959427 | 0.343675 | -1.08006 | 0.296747 | -3.63968 | 0.000436 | 0.005533 | 1 |
| ENSG0000 | mucosal h | Inflamed | RP11-387A | antisense  | chr2  | 1.77E+08 | 1.77E+08 | - | 1553  | 8.042959 | 0.136038 | 0.765984 | 0.21053  | 3.638364 | 0.000438 | 0.005553 | 1 |
| ENSG0000 | mucosal h | Inflamed | TOM1L1    | protein_cc | chr17 | 52976748 | 53039310 | + | 7268  | 980.4797 | 0        | 0.66852  | 0.183742 | 3.638353 | 0.000438 | 0.005553 | 1 |
| ENSG0000 | mucosal h | Inflamed | CHST8     | protein_cc | chr19 | 34112861 | 34264414 | + | 3052  | 13.55847 | 0.095465 | -1.03451 | 0.28438  | -3.63777 | 0.000439 | 0.00556  | 1 |
| ENSG0000 | mucosal h | Inflamed | SCN8A     | protein_cc | chr12 | 51984050 | 52206648 | + | 12457 | 171.8807 | 0.00716  | 0.904011 | 0.248512 | 3.6377   | 0.000439 | 0.00556  | 1 |
| ENSG0000 | mucosal h | Inflamed | TMEM27    | protein_cc | chrX  | 15645441 | 15683154 | - | 1578  | 8.847255 | 0.076372 | 0.630649 | 0.173377 | 3.637448 | 0.000439 | 0.00556  | 1 |
| ENSG0000 | mucosal h | Inflamed | ANKFN1    | protein_cc | chr17 | 54188319 | 54589020 | + | 6923  | 9.634845 | 0.105012 | 0.872997 | 0.240003 | 3.637444 | 0.000439 | 0.00556  | 1 |
| ENSG0000 | mucosal h | Inflamed | MIR3185   | miRNA      | chr17 | 46801770 | 46801837 | - | 68    | 3.167064 | 0.575179 | 0.923267 | 0.253875 | 3.636699 | 0.000441 | 0.005571 | 1 |
| ENSG0000 | mucosal h | Inflamed | C4A       | protein_cc | chr6  | 31949801 | 31970458 | + | 7199  | 793.9403 | 0.00716  | -1.2751  | 0.350709 | -3.63578 | 0.000442 | 0.005586 | 1 |
| ENSG0000 | mucosal h | Inflamed | SLAMF9    | protein_cc | chr1  | 1.6E+08  | 1.6E+08  | - | 1156  | 5.673031 | 0.403341 | -0.9364  | 0.257571 | -3.63552 | 0.000442 | 0.005588 | 1 |
| ENSG0000 | mucosal h | Inflamed | RP11-94L1 | lincRNA    | chr17 | 37913974 | 37920089 | - | 6116  | 1544.776 | 0        | -0.91801 | 0.252593 | -3.63435 | 0.000444 | 0.005605 | 1 |
| ENSG0000 | mucosal h | Inflamed | CXCL16    | protein_cc | chr17 | 4636821  | 4643217  | - | 2794  | 3906.697 | 0        | -0.49498 | 0.136194 | -3.63434 | 0.000444 | 0.005605 | 1 |
| ENSG0000 | mucosal h | Inflamed | RP11-77K1 | protein_cc | chr16 | 75562430 | 75579326 | - | 2125  | 1.384248 | 0.653938 | 0.521182 | 0.14342  | 3.633957 | 0.000445 | 0.005606 | 1 |
| ENSG0000 | mucosal h | Inflamed | SCN2A     | protein_cc | chr2  | 1.66E+08 | 1.66E+08 | + | 12338 | 7.713604 | 0.27685  | -1.00271 | 0.275931 | -3.63394 | 0.000445 | 0.005606 | 1 |
| ENSG0000 | mucosal h | Inflamed | FAM151A   | protein_cc | chr1  | 55074855 | 55089229 | - | 2005  | 82.39857 | 0.069212 | 1.45431  | 0.400208 | 3.63389  | 0.000445 | 0.005606 | 1 |
| ENSG0000 | mucosal h | Inflamed | ADM       | protein_cc | chr11 | 10326227 | 10328944 | + | 2718  | 2536.186 | 0        | -0.80352 | 0.221178 | -3.63289 | 0.000446 | 0.005621 | 1 |
| ENSG0000 | mucosal h | Inflamed | ACOT8     | protein_cc | chr20 | 44470360 | 44486045 | - | 4213  | 962.3079 | 0        | 0.375182 | 0.103276 | 3.632806 | 0.000446 | 0.005621 | 1 |
| ENSG0000 | mucosal h | Inflamed | NUDT16    | protein_cc | chr3  | 1.31E+08 | 1.31E+08 | + | 7038  | 2994.01  | 0        | 0.38581  | 0.106224 | 3.632043 | 0.000448 | 0.005633 | 1 |
| ENSG0000 | mucosal h | Inflamed | SLC5A12   | protein_cc | chr11 | 26688566 | 26744974 | - | 7544  | 39.47971 | 0.372315 | 1.035996 | 0.285315 | 3.631065 | 0.000449 | 0.005649 | 1 |
| ENSG0000 | mucosal h | Inflamed | PARK2     | protein_cc | chr6  | 1.62E+08 | 1.63E+08 | - | 4506  | 58.59427 | 0.00716  | 0.684206 | 0.18848  | 3.63012  | 0.000451 | 0.005665 | 1 |
| ENSG0000 | mucosal h | Inflamed | PMEPA1    | protein_cc | chr20 | 56223448 | 56286592 | - | 5619  | 3656.029 | 0        | -0.52099 | 0.143541 | -3.62951 | 0.000452 | 0.005674 | 1 |
| ENSG0000 | mucosal h | Inflamed | CST7      | protein_cc | chr20 | 24929866 | 24940564 | + | 930   | 488.6277 | 0        | -0.9501  | 0.261918 | -3.62747 | 0.000455 | 0.005711 | 1 |
| ENSG0000 | mucosal h | Inflamed | ANK3      | protein_cc | chr10 | 61786056 | 62493248 | - | 24624 | 1177.726 | 0        | 0.964589 | 0.265943 | 3.627047 | 0.000455 | 0.005715 | 1 |
| ENSG0000 | mucosal h | Inflamed | ATG4D     | protein_cc | chr19 | 10654571 | 10664094 | + | 2278  | 1888.792 | 0        | 0.399849 | 0.110242 | 3.627005 | 0.000455 | 0.005715 | 1 |
| ENSG0000 | mucosal h | Inflamed | APOL3     | protein_cc | chr22 | 36536372 | 36562225 | - | 5990  | 1488.265 | 0        | -0.68066 | 0.187679 | -3.62672 | 0.000456 | 0.005717 | 1 |
| ENSG0000 | mucosal h | Inflamed | CLEC2B    | protein_cc | chr12 | 10005583 | 10022735 | - | 2638  | 292.1599 | 0        | -0.81008 | 0.223382 | -3.62644 | 0.000456 | 0.00572  | 1 |
| ENSG0000 | mucosal h | Inflamed | CRYBA2    | protein_cc | chr2  | 2.2E+08  | 2.2E+08  | - | 1454  | 40.79952 | 0.026253 | 1.230098 | 0.339246 | 3.625976 | 0.000457 | 0.005727 | 1 |
| ENSG0000 | mucosal h | Inflamed | KIF5C     | protein_cc | chr2  | 1.5E+08  | 1.5E+08  | + | 9221  | 99.23628 | 0.00716  | 0.89302  | 0.24632  | 3.625443 | 0.000458 | 0.005734 | 1 |
| ENSG0000 | mucosal h | Inflamed | LINC00589 | lincRNA    | chr8  | 29531438 | 29605625 | - | 2074  | 8.48926  | 0.105012 | 0.846708 | 0.233591 | 3.624746 | 0.000459 | 0.005743 | 1 |



|          |           |          |            |                  |          |          |   |       |          |          |          |          |          |          |          |   |
|----------|-----------|----------|------------|------------------|----------|----------|---|-------|----------|----------|----------|----------|----------|----------|----------|---|
| ENSG0000 | mucosal h | Inflamed | UBE2E2     | protein_cc chr3  | 23244511 | 23633284 | + | 3272  | 265.0477 | 0        | -0.61891 | 0.170755 | -3.62457 | 0.000459 | 0.005743 | 1 |
| ENSG0000 | mucosal h | Inflamed | C12orf68   | protein_cc chr12 | 48577366 | 48579709 | + | 2344  | 60.12649 | 0.004773 | -0.86132 | 0.23764  | -3.62446 | 0.000459 | 0.005743 | 1 |
| ENSG0000 | mucosal h | Inflamed | MAP7D2     | protein_cc chrX  | 20024831 | 20135035 | - | 4475  | 44.67542 | 0.02864  | 0.98619  | 0.272095 | 3.624431 | 0.000459 | 0.005743 | 1 |
| ENSG0000 | mucosal h | Inflamed | XXyac-YRN  | pseudoger chr9   | 14511    | 29739    | - | 2216  | 322.7112 | 0        | 0.44101  | 0.121719 | 3.623174 | 0.000461 | 0.005765 | 1 |
| ENSG0000 | mucosal h | Inflamed | SRGAP1     | protein_cc chr12 | 64238073 | 64541613 | + | 12253 | 978.0907 | 0        | 0.61598  | 0.170042 | 3.622512 | 0.000462 | 0.005768 | 1 |
| ENSG0000 | mucosal h | Inflamed | SYTL2      | protein_cc chr11 | 85405267 | 85522184 | - | 11248 | 3512.611 | 0        | 0.987813 | 0.27269  | 3.622475 | 0.000462 | 0.005768 | 1 |
| ENSG0000 | mucosal h | Inflamed | RP11-700F  | lincRNA chr17    | 49012350 | 49022074 | - | 2054  | 12.62291 | 0.062053 | 0.719537 | 0.198637 | 3.622378 | 0.000463 | 0.005768 | 1 |
| ENSG0000 | mucosal h | Inflamed | XRCC6BP1   | protein_cc chr12 | 58335324 | 58351052 | + | 1373  | 244.6659 | 0        | 0.578186 | 0.159617 | 3.622338 | 0.000463 | 0.005768 | 1 |
| ENSG0000 | mucosal h | Inflamed | GMNN       | protein_cc chr6  | 24775159 | 24786327 | + | 2476  | 612.3484 | 0        | 0.559254 | 0.154395 | 3.62222  | 0.000463 | 0.005768 | 1 |
| ENSG0000 | mucosal h | Inflamed | TMEM38B    | protein_cc chr9  | 1.08E+08 | 1.09E+08 | + | 4511  | 271.1384 | 0        | 0.488714 | 0.134921 | 3.622213 | 0.000463 | 0.005768 | 1 |
| ENSG0000 | mucosal h | Inflamed | LARP1P1    | pseudoger chr6   | 26164300 | 26164591 | + | 292   | 2.794749 | 0.391408 | 0.631433 | 0.174333 | 3.622004 | 0.000463 | 0.005769 | 1 |
| ENSG0000 | mucosal h | Inflamed | LRP8       | protein_cc chr1  | 53711217 | 53793742 | - | 7077  | 361.0835 | 0.002387 | -0.91836 | 0.253595 | -3.62137 | 0.000464 | 0.005777 | 1 |
| ENSG0000 | mucosal h | Inflamed | RP1-45C12  | antisense chr1   | 1.71E+08 | 1.71E+08 | - | 416   | 2.601432 | 0.431981 | -0.61447 | 0.16968  | -3.62132 | 0.000464 | 0.005777 | 1 |
| ENSG0000 | mucosal h | Inflamed | ILDR2      | protein_cc chr1  | 1.67E+08 | 1.67E+08 | - | 8283  | 39.88783 | 0.02864  | 0.953129 | 0.263223 | 3.620993 | 0.000465 | 0.005781 | 1 |
| ENSG0000 | mucosal h | Inflamed | AC026202   | antisense chr3   | 5198590  | 5229014  | - | 672   | 26.44153 | 0.004773 | -0.81967 | 0.226415 | -3.62023 | 0.000466 | 0.005793 | 1 |
| ENSG0000 | mucosal h | Inflamed | DDAH1      | protein_cc chr1  | 85784164 | 86043933 | - | 5982  | 3939.172 | 0        | 0.619101 | 0.171026 | 3.619932 | 0.000467 | 0.005796 | 1 |
| ENSG0000 | mucosal h | Inflamed | FOXD2      | protein_cc chr1  | 47901689 | 47906363 | + | 4675  | 859.6158 | 0        | 0.949476 | 0.262377 | 3.618744 | 0.000468 | 0.005817 | 1 |
| ENSG0000 | mucosal h | Inflamed | DDN        | protein_cc chr12 | 49388932 | 49393092 | - | 3749  | 12.15036 | 0.033413 | -0.65925 | 0.182199 | -3.61829 | 0.000469 | 0.005823 | 1 |
| ENSG0000 | mucosal h | Inflamed | ASAP3      | protein_cc chr1  | 23755056 | 23811061 | - | 4988  | 1716.317 | 0        | 0.483158 | 0.133539 | 3.618109 | 0.000469 | 0.005824 | 1 |
| ENSG0000 | mucosal h | Inflamed | HR         | protein_cc chr8  | 21971928 | 21990897 | - | 8784  | 3324.107 | 0        | 0.655619 | 0.181244 | 3.617317 | 0.000471 | 0.005835 | 1 |
| ENSG0000 | mucosal h | Inflamed | FBXO31     | protein_cc chr16 | 87360593 | 87425748 | - | 6810  | 2351.888 | 0        | 0.427447 | 0.118168 | 3.61727  | 0.000471 | 0.005835 | 1 |
| ENSG0000 | mucosal h | Inflamed | CCDC33     | protein_cc chr15 | 74509613 | 74628813 | + | 5275  | 2.193317 | 0.470167 | 0.522718 | 0.144566 | 3.615764 | 0.000473 | 0.005862 | 1 |
| ENSG0000 | mucosal h | Inflamed | ABCG5      | protein_cc chr2  | 44039611 | 44066004 | - | 3720  | 47.50119 | 0.033413 | -1.12296 | 0.310594 | -3.61552 | 0.000474 | 0.005865 | 1 |
| ENSG0000 | mucosal h | Inflamed | PDCD1LG2   | protein_cc chr9  | 5510545  | 5571282  | + | 2418  | 125.1193 | 0.002387 | -0.88199 | 0.243971 | -3.61512 | 0.000474 | 0.00587  | 1 |
| ENSG0000 | mucosal h | Inflamed | ELOVL5     | protein_cc chr6  | 53132196 | 53213947 | - | 4223  | 1310.482 | 0        | -0.7672  | 0.21225  | -3.6146  | 0.000475 | 0.005877 | 1 |
| ENSG0000 | mucosal h | Inflamed | DPP7       | protein_cc chr9  | 1.4E+08  | 1.4E+08  | - | 2820  | 3208.95  | 0        | -0.57488 | 0.159072 | -3.61397 | 0.000476 | 0.005887 | 1 |
| ENSG0000 | mucosal h | Inflamed | IFNG-AS1   | antisense chr12  | 68383225 | 68628466 | + | 2125  | 31.08592 | 0.045346 | -1.11928 | 0.309833 | -3.61251 | 0.000478 | 0.005914 | 1 |
| ENSG0000 | mucosal h | Inflamed | RP11-611C  | antisense chr12  | 69235068 | 69237017 | - | 785   | 15.92363 | 0.057279 | 0.850411 | 0.235447 | 3.611892 | 0.000479 | 0.005924 | 1 |
| ENSG0000 | mucosal h | Inflamed | SH3RF3-AS1 | lincRNA chr2     | 1.1E+08  | 1.1E+08  | - | 1604  | 18.92363 | 0.0358   | -0.87263 | 0.241635 | -3.61138 | 0.00048  | 0.00593  | 1 |
| ENSG0000 | mucosal h | Inflamed | CYP2B6     | protein_cc chr19 | 41497204 | 41524303 | + | 3589  | 677.3699 | 0.01432  | 1.483754 | 0.410867 | 3.611279 | 0.00048  | 0.00593  | 1 |
| ENSG0000 | mucosal h | Inflamed | FER1L4     | pseudoger chr20  | 34146507 | 34195484 | - | 9212  | 1416.384 | 0.002387 | -1.17473 | 0.325332 | -3.61087 | 0.000481 | 0.005935 | 1 |
| ENSG0000 | mucosal h | Inflamed | APBB1IP    | protein_cc chr10 | 26727132 | 26856732 | + | 3981  | 1006.251 | 0        | -0.84147 | 0.233045 | -3.61076 | 0.000481 | 0.005935 | 1 |
| ENSG0000 | mucosal h | Inflamed | SIRPG      | protein_cc chr20 | 1609798  | 1638425  | - | 2242  | 238.5967 | 0        | -0.74458 | 0.206238 | -3.61029 | 0.000482 | 0.005942 | 1 |
| ENSG0000 | mucosal h | Inflamed | NAP1L6     | protein_cc chrX  | 72345876 | 72347919 | - | 2044  | 1.921241 | 0.682578 | 0.599826 | 0.166151 | 3.610118 | 0.000482 | 0.005943 | 1 |
| ENSG0000 | mucosal h | Inflamed | IL33       | protein_cc chr9  | 6215805  | 6257983  | + | 3232  | 379.2768 | 0        | -0.99186 | 0.274792 | -3.6095  | 0.000483 | 0.005952 | 1 |
| ENSG0000 | mucosal h | Inflamed | WFDC2      | protein_cc chr20 | 44098346 | 44110172 | + | 1382  | 2200.683 | 0        | 1.275739 | 0.353523 | 3.608641 | 0.000485 | 0.005967 | 1 |
| ENSG0000 | mucosal h | Inflamed | GUCY1A2    | protein_cc chr11 | 1.07E+08 | 1.07E+08 | - | 16361 | 58.40811 | 0.026253 | -0.98892 | 0.274063 | -3.60838 | 0.000485 | 0.00597  | 1 |
| ENSG0000 | mucosal h | Inflamed | GPRC5C     | protein_cc chr17 | 72420990 | 72447792 | + | 8005  | 2406.27  | 0        | 0.548568 | 0.152065 | 3.607464 | 0.000487 | 0.005985 | 1 |
| ENSG0000 | mucosal h | Inflamed | RXFP4      | protein_cc chr1  | 1.56E+08 | 1.56E+08 | + | 1146  | 57.11456 | 0.016706 | 0.885607 | 0.245513 | 3.607162 | 0.000487 | 0.005989 | 1 |
| ENSG0000 | mucosal h | Inflamed | DDAH2      | protein_cc chr6  | 31694815 | 31698394 | - | 2538  | 2143.811 | 0        | 0.379451 | 0.105232 | 3.60584  | 0.000489 | 0.006013 | 1 |

|          |           |          |           |            |       |          |          |   |       |          |          |          |          |          |          |          |   |
|----------|-----------|----------|-----------|------------|-------|----------|----------|---|-------|----------|----------|----------|----------|----------|----------|----------|---|
| ENSG0000 | mucosal h | Inflamed | PHLDB1    | protein_cc | chr11 | 1.18E+08 | 1.19E+08 | + | 21988 | 4977.463 | 0        | 0.560608 | 0.155502 | 3.605159 | 0.000491 | 0.006022 | 1 |
| ENSG0000 | mucosal h | Inflamed | KIF26B    | protein_cc | chr1  | 2.45E+08 | 2.46E+08 | + | 14403 | 232.2768 | 0.02148  | -1.28014 | 0.355089 | -3.60512 | 0.000491 | 0.006022 | 1 |
| ENSG0000 | mucosal h | Inflamed | AC098823  | lincRNA    | chr2  | 2.32E+08 | 2.32E+08 | - | 2609  | 3.26253  | 0.319809 | 0.604128 | 0.167614 | 3.604277 | 0.000492 | 0.006036 | 1 |
| ENSG0000 | mucosal h | Inflamed | OVGP1     | protein_cc | chr1  | 1.12E+08 | 1.12E+08 | - | 2988  | 97.30072 | 0        | 0.528585 | 0.146675 | 3.603782 | 0.000493 | 0.006043 | 1 |
| ENSG0000 | mucosal h | Inflamed | SPRYD7    | protein_cc | chr13 | 50486842 | 50510626 | - | 3340  | 458.4224 | 0        | 0.419167 | 0.116316 | 3.603674 | 0.000493 | 0.006043 | 1 |
| ENSG0000 | mucosal h | Inflamed | HLA-DPA1  | protein_cc | chr6  | 33032346 | 33048552 | - | 5748  | 13032.76 | 0        | -0.65626 | 0.182149 | -3.60284 | 0.000494 | 0.006057 | 1 |
| ENSG0000 | mucosal h | Inflamed | KCNE1L    | protein_cc | chrX  | 1.09E+08 | 1.09E+08 | - | 1465  | 7.622912 | 0.274463 | -1.02912 | 0.285664 | -3.60256 | 0.000495 | 0.00606  | 1 |
| ENSG0000 | mucosal h | Inflamed | RP11-555k | pseudoger  | chr4  | 1.53E+08 | 1.53E+08 | - | 777   | 8.341289 | 0.116945 | -0.81463 | 0.226143 | -3.60226 | 0.000495 | 0.006064 | 1 |
| ENSG0000 | mucosal h | Inflamed | AP000695  | antisense  | chr21 | 37818029 | 37904706 | + | 1178  | 3.832936 | 0.400955 | -0.80044 | 0.222241 | -3.60169 | 0.000496 | 0.006073 | 1 |
| ENSG0000 | mucosal h | Inflamed | CACNA1A   | protein_cc | chr19 | 13317256 | 13734804 | - | 10904 | 152.0621 | 0        | 0.882805 | 0.245144 | 3.601169 | 0.000497 | 0.006081 | 1 |
| ENSG0000 | mucosal h | Inflamed | APOBEC3f  | protein_cc | chr22 | 39493229 | 39500072 | + | 1251  | 23.50119 | 0.011933 | -0.722   | 0.2005   | -3.601   | 0.000498 | 0.006081 | 1 |
| ENSG0000 | mucosal h | Inflamed | SYTL4     | protein_cc | chrX  | 99929488 | 99987110 | - | 7518  | 891.0764 | 0        | 0.79791  | 0.221617 | 3.600404 | 0.000499 | 0.006083 | 1 |
| ENSG0000 | mucosal h | Inflamed | PRSS36    | protein_cc | chr16 | 31150246 | 31161415 | - | 3685  | 167.9093 | 0        | 0.560278 | 0.155619 | 3.600326 | 0.000499 | 0.006083 | 1 |
| ENSG0000 | mucosal h | Inflamed | TDP2      | protein_cc | chr6  | 24650205 | 24667261 | - | 3082  | 4682.282 | 0        | 0.750052 | 0.20833  | 3.600315 | 0.000499 | 0.006083 | 1 |
| ENSG0000 | mucosal h | Inflamed | CLCA3P    | pseudoger  | chr1  | 87099956 | 87121059 | + | 3437  | 18.70406 | 0.136038 | -1.19039 | 0.330648 | -3.60017 | 0.000499 | 0.006083 | 1 |
| ENSG0000 | mucosal h | Inflamed | CCT8P1    | pseudoger  | chr1  | 1.47E+08 | 1.47E+08 | - | 1657  | 63.72315 | 0.009547 | 0.898462 | 0.249565 | 3.600112 | 0.000499 | 0.006083 | 1 |
| ENSG0000 | mucosal h | Inflamed | TPTE2     | protein_cc | chr13 | 19997017 | 20110903 | - | 2288  | 12.97375 | 0.131265 | -0.9941  | 0.276133 | -3.60009 | 0.000499 | 0.006083 | 1 |
| ENSG0000 | mucosal h | Inflamed | ACADS     | protein_cc | chr12 | 1.21E+08 | 1.21E+08 | + | 2648  | 5616.556 | 0        | 0.644738 | 0.179103 | 3.599817 | 0.0005   | 0.006086 | 1 |
| ENSG0000 | mucosal h | Inflamed | BHLHE40   | protein_cc | chr3  | 5020801  | 5027008  | + | 3837  | 5131.451 | 0        | -0.54632 | 0.151771 | -3.59967 | 0.0005   | 0.006086 | 1 |
| ENSG0000 | mucosal h | Inflamed | ARHGAP3f  | protein_cc | chr8  | 1.46E+08 | 1.46E+08 | - | 5012  | 573.0931 | 0        | 0.561986 | 0.156139 | 3.599265 | 0.000501 | 0.006091 | 1 |
| ENSG0000 | mucosal h | Inflamed | GNB3      | protein_cc | chr12 | 6949118  | 6956557  | + | 3437  | 108.5346 | 0        | -0.73766 | 0.204952 | -3.59919 | 0.000501 | 0.006091 | 1 |
| ENSG0000 | mucosal h | Inflamed | LDLRAD3   | protein_cc | chr11 | 35965531 | 36253686 | + | 4575  | 389.2625 | 0        | -0.87875 | 0.244183 | -3.59872 | 0.000501 | 0.006097 | 1 |
| ENSG0000 | mucosal h | Inflamed | ACTBP1    | pseudoger  | chrX  | 46147451 | 46148563 | - | 1113  | 1.916468 | 0.644391 | -0.7434  | 0.206581 | -3.59858 | 0.000502 | 0.006098 | 1 |
| ENSG0000 | mucosal h | Inflamed | RP11-884k | antisense  | chr3  | 53831791 | 53832046 | - | 256   | 1.720764 | 0.661098 | 0.482151 | 0.134002 | 3.598092 | 0.000503 | 0.006105 | 1 |
| ENSG0000 | mucosal h | Inflamed | IGHV1-45  | IG_V_gene  | chr14 | 1.07E+08 | 1.07E+08 | - | 409   | 148.0811 | 0.105012 | -1.88954 | 0.525199 | -3.59777 | 0.000503 | 0.006107 | 1 |
| ENSG0000 | mucosal h | Inflamed | DIAPH2-Af | antisense  | chrX  | 96686285 | 96897588 | - | 2309  | 2.429594 | 0.5179   | -0.68303 | 0.189852 | -3.5977  | 0.000503 | 0.006107 | 1 |
| ENSG0000 | mucosal h | Inflamed | RP11-274E | lincRNA    | chr9  | 71158457 | 71161505 | - | 526   | 6.75179  | 0.379475 | -1.08419 | 0.301376 | -3.59745 | 0.000504 | 0.00611  | 1 |
| ENSG0000 | mucosal h | Inflamed | MSX1      | protein_cc | chr4  | 4861393  | 4865663  | + | 2120  | 35.80907 | 0.01432  | -0.85478 | 0.237628 | -3.59715 | 0.000504 | 0.006113 | 1 |
| ENSG0000 | mucosal h | Inflamed | MADCAM1   | protein_cc | chr19 | 489176   | 505347   | + | 2441  | 733.2697 | 0        | -1.258   | 0.349767 | -3.5967  | 0.000505 | 0.00612  | 1 |
| ENSG0000 | mucosal h | Inflamed | TPM1      | protein_cc | chr15 | 63334831 | 63364114 | + | 8468  | 9524.317 | 0        | 0.426215 | 0.118567 | 3.594714 | 0.000508 | 0.006156 | 1 |
| ENSG0000 | mucosal h | Inflamed | RP4-647J2 | sense_ove  | chr7  | 44998598 | 45000508 | - | 1911  | 72.74224 | 0.016706 | -0.98545 | 0.27414  | -3.59471 | 0.000508 | 0.006156 | 1 |
| ENSG0000 | mucosal h | Inflamed | TNFSF8    | protein_cc | chr9  | 1.18E+08 | 1.18E+08 | - | 2348  | 124.7733 | 0.004773 | -0.99838 | 0.277752 | -3.59449 | 0.000509 | 0.006157 | 1 |
| ENSG0000 | mucosal h | Inflamed | RP11-61A1 | antisense  | chr16 | 66875336 | 66887351 | - | 434   | 11.79236 | 0.062053 | 0.7076   | 0.196873 | 3.594187 | 0.000509 | 0.00616  | 1 |
| ENSG0000 | mucosal h | Inflamed | COBL      | protein_cc | chr7  | 51083909 | 51384515 | - | 14304 | 2722.737 | 0        | 0.803562 | 0.223579 | 3.594086 | 0.000509 | 0.00616  | 1 |
| ENSG0000 | mucosal h | Inflamed | GDE1      | protein_cc | chr16 | 19513015 | 19533467 | - | 4412  | 3942.981 | 0        | 0.393152 | 0.109427 | 3.592834 | 0.000512 | 0.006183 | 1 |
| ENSG0000 | mucosal h | Inflamed | TCIRG1    | protein_cc | chr11 | 67806483 | 67818362 | + | 4384  | 7170.379 | 0        | -0.47807 | 0.133089 | -3.59212 | 0.000513 | 0.006196 | 1 |
| ENSG0000 | mucosal h | Inflamed | FHL3      | protein_cc | chr1  | 38462442 | 38471278 | - | 2004  | 509.7828 | 0        | -0.67272 | 0.187296 | -3.59177 | 0.000513 | 0.006198 | 1 |
| ENSG0000 | mucosal h | Inflamed | SOWAHA    | protein_cc | chr5  | 1.32E+08 | 1.32E+08 | + | 3456  | 1046.301 | 0        | 1.114815 | 0.310384 | 3.591725 | 0.000513 | 0.006198 | 1 |
| ENSG0000 | mucosal h | Inflamed | RP11-379k | antisense  | chr3  | 1.7E+08  | 1.7E+08  | + | 1781  | 36.18138 | 0.004773 | 0.85657  | 0.238528 | 3.591069 | 0.000515 | 0.006209 | 1 |
| ENSG0000 | mucosal h | Inflamed | SPPL2B    | processed  | chr19 | 2328614  | 2355099  | + | 7096  | 4274.936 | 0        | 0.492119 | 0.137071 | 3.590262 | 0.000516 | 0.006223 | 1 |

|          |           |          |           |                  |          |          |   |       |          |          |          |          |          |          |          |   |
|----------|-----------|----------|-----------|------------------|----------|----------|---|-------|----------|----------|----------|----------|----------|----------|----------|---|
| ENSG0000 | mucosal h | Inflamed | PHLPP2    | protein_cc chr16 | 71671738 | 71758604 | - | 12493 | 3004.675 | 0        | 1.037518 | 0.289026 | 3.589703 | 0.000517 | 0.006232 | 1 |
| ENSG0000 | mucosal h | Inflamed | ROGDI     | protein_cc chr16 | 4846969  | 4852951  | - | 3683  | 685.2959 | 0        | 0.363306 | 0.101217 | 3.589374 | 0.000518 | 0.006232 | 1 |
| ENSG0000 | mucosal h | Inflamed | CHAT      | protein_cc chr10 | 50817141 | 50901925 | + | 3100  | 20.44153 | 0.214797 | 1.067672 | 0.29746  | 3.589297 | 0.000518 | 0.006232 | 1 |
| ENSG0000 | mucosal h | Inflamed | FZD8      | protein_cc chr10 | 35927177 | 35930362 | - | 3186  | 474.0072 | 0        | 0.63394  | 0.17662  | 3.589283 | 0.000518 | 0.006232 | 1 |
| ENSG0000 | mucosal h | Inflamed | TSPAN11   | protein_cc chr12 | 31079362 | 31149534 | + | 7113  | 3399.186 | 0        | -0.81153 | 0.226129 | -3.5888  | 0.000519 | 0.00624  | 1 |
| ENSG0000 | mucosal h | Inflamed | AC125232  | pseudoger chr2   | 87257800 | 87303536 | - | 2277  | 107.1742 | 0        | 0.407005 | 0.113437 | 3.587933 | 0.00052  | 0.006255 | 1 |
| ENSG0000 | mucosal h | Inflamed | LPPR1     | protein_cc chr9  | 1.04E+08 | 1.04E+08 | + | 3669  | 4.379475 | 0.300716 | 0.638271 | 0.177943 | 3.58694  | 0.000522 | 0.006274 | 1 |
| ENSG0000 | mucosal h | Inflamed | IGKV3D-7  | IG_V_gene chr2   | 90273679 | 90274235 | + | 382   | 18.58473 | 0.069212 | -1.11373 | 0.310509 | -3.5868  | 0.000522 | 0.006274 | 1 |
| ENSG0000 | mucosal h | Inflamed | DLL3      | protein_cc chr19 | 39989535 | 39999121 | + | 2618  | 4.682578 | 0.221957 | -0.76989 | 0.214694 | -3.586   | 0.000524 | 0.006288 | 1 |
| ENSG0000 | mucosal h | Inflamed | FBXO16    | protein_cc chr8  | 28205804 | 28347835 | - | 3972  | 67.22912 | 0        | -0.66845 | 0.18643  | -3.58551 | 0.000524 | 0.006295 | 1 |
| ENSG0000 | mucosal h | Inflamed | MT-TV     | Mt_tRNA chrM     | 1602     | 1670     | + | 69    | 246      | 0.002387 | 1.186517 | 0.330945 | 3.585241 | 0.000525 | 0.006298 | 1 |
| ENSG0000 | mucosal h | Inflamed | ZFAT      | protein_cc chr8  | 1.35E+08 | 1.36E+08 | - | 8900  | 450.1885 | 0        | -0.33693 | 0.093981 | -3.58508 | 0.000525 | 0.006298 | 1 |
| ENSG0000 | mucosal h | Inflamed | NINJ1     | protein_cc chr9  | 95883771 | 95896570 | - | 2648  | 1883.208 | 0        | -0.64465 | 0.179818 | -3.58498 | 0.000525 | 0.006298 | 1 |
| ENSG0000 | mucosal h | Inflamed | PER2      | protein_cc chr2  | 2.39E+08 | 2.39E+08 | - | 6877  | 1780.253 | 0        | 0.620093 | 0.172997 | 3.584409 | 0.000526 | 0.006307 | 1 |
| ENSG0000 | mucosal h | Inflamed | POU5F1    | protein_cc chr6  | 31132119 | 31148508 | - | 2876  | 180.0549 | 0        | 1.03354  | 0.288389 | 3.583832 | 0.000527 | 0.006317 | 1 |
| ENSG0000 | mucosal h | Inflamed | PSME1     | protein_cc chr14 | 24605367 | 24608176 | + | 1781  | 7026.921 | 0        | -0.29294 | 0.081743 | -3.58365 | 0.000528 | 0.006318 | 1 |
| ENSG0000 | mucosal h | Inflamed | FOXP1     | protein_cc chr3  | 71003844 | 71633140 | - | 13359 | 2118.979 | 0        | 0.481929 | 0.134495 | 3.583249 | 0.000528 | 0.006324 | 1 |
| ENSG0000 | mucosal h | Inflamed | MBOAT2    | protein_cc chr2  | 8992820  | 9143942  | - | 8798  | 1329.554 | 0        | 0.706572 | 0.197245 | 3.582209 | 0.00053  | 0.006343 | 1 |
| ENSG0000 | mucosal h | Inflamed | MYF6      | protein_cc chr12 | 81101277 | 81103253 | + | 1465  | 1.959427 | 0.677804 | -0.79364 | 0.221582 | -3.58171 | 0.000531 | 0.006351 | 1 |
| ENSG0000 | mucosal h | Inflamed | SYTL1     | protein_cc chr1  | 27668513 | 27680421 | + | 5575  | 1727.086 | 0        | -0.59452 | 0.166011 | -3.5812  | 0.000532 | 0.006359 | 1 |
| ENSG0000 | mucosal h | Inflamed | FES       | protein_cc chr15 | 91426925 | 91439006 | + | 4241  | 918.358  | 0        | -0.6133  | 0.171265 | -3.581   | 0.000532 | 0.00636  | 1 |
| ENSG0000 | mucosal h | Inflamed | TNFAIP2   | protein_cc chr14 | 1.04E+08 | 1.04E+08 | + | 5029  | 6577.599 | 0        | -0.89233 | 0.249202 | -3.58074 | 0.000533 | 0.006363 | 1 |
| ENSG0000 | mucosal h | Inflamed | LRRC32    | protein_cc chr11 | 76368568 | 76381791 | - | 4459  | 1769.683 | 0        | -0.70319 | 0.196391 | -3.58058 | 0.000533 | 0.006364 | 1 |
| ENSG0000 | mucosal h | Inflamed | GULOP     | pseudoger chr8   | 27417791 | 27446590 | + | 748   | 3.119332 | 0.494033 | 0.586136 | 0.163717 | 3.580186 | 0.000534 | 0.006369 | 1 |
| ENSG0000 | mucosal h | Inflamed | SPIB      | protein_cc chr19 | 50922195 | 50934570 | + | 4281  | 1536.511 | 0        | 1.042136 | 0.291105 | 3.579932 | 0.000534 | 0.006372 | 1 |
| ENSG0000 | mucosal h | Inflamed | SPATA25   | protein_cc chr20 | 44515128 | 44516274 | - | 757   | 42.8401  | 0.019093 | 0.806677 | 0.225346 | 3.579735 | 0.000535 | 0.006373 | 1 |
| ENSG0000 | mucosal h | Inflamed | ARHGAP3C  | protein_cc chr1  | 1.61E+08 | 1.61E+08 | - | 5064  | 3224.618 | 0        | -0.76795 | 0.214533 | -3.57962 | 0.000535 | 0.006373 | 1 |
| ENSG0000 | mucosal h | Inflamed | DEGS1     | protein_cc chr1  | 2.24E+08 | 2.24E+08 | + | 2515  | 1337.604 | 0        | -0.45612 | 0.127428 | -3.57945 | 0.000535 | 0.006374 | 1 |
| ENSG0000 | mucosal h | Inflamed | GLIPR1    | protein_cc chr12 | 75874460 | 75897633 | + | 6273  | 707.9547 | 0        | -0.78828 | 0.220248 | -3.57905 | 0.000536 | 0.006379 | 1 |
| ENSG0000 | mucosal h | Inflamed | NPIP7     | protein_cc chr16 | 28467693 | 28481868 | - | 1406  | 7.983294 | 0.112172 | 0.693821 | 0.193878 | 3.578636 | 0.000537 | 0.006385 | 1 |
| ENSG0000 | mucosal h | Inflamed | TWIST1    | protein_cc chr7  | 19060614 | 19157295 | - | 2033  | 121.4702 | 0.00716  | -1.22254 | 0.341651 | -3.57833 | 0.000537 | 0.006387 | 1 |
| ENSG0000 | mucosal h | Inflamed | P2RX5-TA> | protein_cc chr17 | 3566357  | 3599488  | - | 5905  | 19.56802 | 0.047733 | -0.86653 | 0.242185 | -3.57798 | 0.000538 | 0.006387 | 1 |
| ENSG0000 | mucosal h | Inflamed | RP5-1132f | pseudoger chr7   | 65490113 | 65496531 | - | 306   | 2.443914 | 0.46778  | 0.489651 | 0.136852 | 3.577962 | 0.000538 | 0.006387 | 1 |
| ENSG0000 | mucosal h | Inflamed | PANK1     | protein_cc chr10 | 91342745 | 91405215 | - | 4127  | 726.0907 | 0        | 0.838246 | 0.234284 | 3.5779   | 0.000538 | 0.006387 | 1 |
| ENSG0000 | mucosal h | Inflamed | RP11-230E | antisense chr1   | 63154153 | 63176365 | + | 1228  | 14.15752 | 0.040573 | 0.739766 | 0.206761 | 3.577872 | 0.000538 | 0.006387 | 1 |
| ENSG0000 | mucosal h | Inflamed | RGSS5     | protein_cc chr1  | 1.63E+08 | 1.63E+08 | - | 6812  | 3629.2   | 0        | -1.05381 | 0.294612 | -3.57694 | 0.00054  | 0.006405 | 1 |
| ENSG0000 | mucosal h | Inflamed | LARGE     | protein_cc chr22 | 33558212 | 34318829 | - | 10687 | 1897.072 | 0        | 0.44537  | 0.124522 | 3.57663  | 0.00054  | 0.006409 | 1 |
| ENSG0000 | mucosal h | Inflamed | CAPG      | protein_cc chr2  | 85621871 | 85645555 | - | 2607  | 3490.659 | 0        | -0.38914 | 0.108811 | -3.57631 | 0.000541 | 0.006412 | 1 |
| ENSG0000 | mucosal h | Inflamed | RP11-297f | protein_cc chr8  | 11655437 | 11660077 | - | 1091  | 11.36277 | 0.031026 | 0.603125 | 0.168655 | 3.576086 | 0.000541 | 0.006412 | 1 |
| ENSG0000 | mucosal h | Inflamed | RP11-384L | sense_intr chr3  | 32278180 | 32280070 | - | 1891  | 73.43675 | 0.004773 | 0.735451 | 0.20566  | 3.576049 | 0.000541 | 0.006412 | 1 |

|          |           |          |           |            |       |          |          |   |      |          |          |          |          |          |          |          |   |
|----------|-----------|----------|-----------|------------|-------|----------|----------|---|------|----------|----------|----------|----------|----------|----------|----------|---|
| ENSG0000 | mucosal h | Inflamed | DRAM1     | protein_cc | chr12 | 1.02E+08 | 1.02E+08 | + | 4061 | 1084.709 | 0        | -0.76018 | 0.212629 | -3.57517 | 0.000543 | 0.006429 | 1 |
| ENSG0000 | mucosal h | Inflamed | PCNPP5    | pseudoger  | chr13 | 48902220 | 48902700 | - | 481  | 1.331742 | 0.642005 | 0.416715 | 0.116573 | 3.574701 | 0.000544 | 0.006436 | 1 |
| ENSG0000 | mucosal h | Inflamed | ADORA1    | protein_cc | chr1  | 2.03E+08 | 2.03E+08 | + | 4191 | 181.7279 | 0.002387 | -0.77613 | 0.217144 | -3.57425 | 0.000545 | 0.006443 | 1 |
| ENSG0000 | mucosal h | Inflamed | FAM171A1  | protein_cc | chr10 | 15253642 | 15413061 | - | 3955 | 3249.477 | 0        | 0.467371 | 0.130768 | 3.574058 | 0.000545 | 0.006444 | 1 |
| ENSG0000 | mucosal h | Inflamed | HAS1      | protein_cc | chr19 | 52216365 | 52227247 | - | 2241 | 71.40095 | 0.109785 | -1.57621 | 0.44109  | -3.57343 | 0.000546 | 0.006455 | 1 |
| ENSG0000 | mucosal h | Inflamed | P2RY1     | protein_cc | chr3  | 1.53E+08 | 1.53E+08 | + | 3106 | 390.6086 | 0.002387 | 1.128275 | 0.315792 | 3.57284  | 0.000547 | 0.006465 | 1 |
| ENSG0000 | mucosal h | Inflamed | 03-Sep    | protein_cc | chr22 | 42372276 | 42394225 | + | 5427 | 63.66587 | 0.00716  | -0.77487 | 0.216914 | -3.57226 | 0.000548 | 0.006474 | 1 |
| ENSG0000 | mucosal h | Inflamed | RP4-550H1 | lincRNA    | chr20 | 34660363 | 34673182 | + | 682  | 1.527446 | 0.584726 | 0.471116 | 0.131885 | 3.57218  | 0.000549 | 0.006474 | 1 |
| ENSG0000 | mucosal h | Inflamed | ARHGEF10  | protein_cc | chr1  | 17866330 | 18024369 | + | 7847 | 4622.119 | 0        | 0.49978  | 0.13994  | 3.571373 | 0.00055  | 0.006486 | 1 |
| ENSG0000 | mucosal h | Inflamed | RP11-245J | antisense  | chr3  | 64005184 | 64005601 | + | 418  | 3.178998 | 0.341289 | 0.614166 | 0.17197  | 3.571354 | 0.00055  | 0.006486 | 1 |
| ENSG0000 | mucosal h | Inflamed | SPON1     | processed  | chr11 | 13983914 | 14289646 | + | 5639 | 4792.737 | 0        | 0.775304 | 0.217104 | 3.571114 | 0.000551 | 0.006488 | 1 |
| ENSG0000 | mucosal h | Inflamed | CTC-429P5 | sense_intr | chr19 | 16744614 | 16746080 | - | 1467 | 232.6921 | 0        | 0.555045 | 0.155472 | 3.570053 | 0.000553 | 0.006509 | 1 |
| ENSG0000 | mucosal h | Inflamed | RP11-4667 | sense_intr | chr17 | 30839887 | 30846368 | - | 420  | 3.093079 | 0.293556 | 0.589043 | 0.165002 | 3.56992  | 0.000553 | 0.006509 | 1 |
| ENSG0000 | mucosal h | Inflamed | RP11-761E | lincRNA    | chrX  | 1.15E+08 | 1.15E+08 | - | 2079 | 5.914081 | 0.126492 | 0.58772  | 0.164671 | 3.569055 | 0.000554 | 0.006525 | 1 |
| ENSG0000 | mucosal h | Inflamed | RNF112    | protein_cc | chr17 | 19314438 | 19320589 | + | 3652 | 133.7088 | 0.004773 | 0.798774 | 0.223836 | 3.568569 | 0.000555 | 0.006532 | 1 |
| ENSG0000 | mucosal h | Inflamed | CTD-2611C | sense_intr | chr19 | 56220176 | 56220486 | + | 311  | 8.863962 | 0.121718 | 0.793424 | 0.222343 | 3.568475 | 0.000556 | 0.006532 | 1 |
| ENSG0000 | mucosal h | Inflamed | PDK4      | protein_cc | chr7  | 95212811 | 95225803 | - | 4519 | 1737.038 | 0        | 0.928573 | 0.260251 | 3.567997 | 0.000556 | 0.006539 | 1 |
| ENSG0000 | mucosal h | Inflamed | KIAA1324  | protein_cc | chr1  | 1.1E+08  | 1.1E+08  | + | 9298 | 7087.931 | 0        | 0.879883 | 0.246666 | 3.567102 | 0.000558 | 0.006556 | 1 |
| ENSG0000 | mucosal h | Inflamed | APLNR     | protein_cc | chr11 | 57001051 | 57004709 | - | 3659 | 2261.489 | 0        | -0.9154  | 0.256654 | -3.56668 | 0.000559 | 0.006563 | 1 |
| ENSG0000 | mucosal h | Inflamed | KLRG2     | protein_cc | chr7  | 1.39E+08 | 1.39E+08 | - | 2197 | 5.002387 | 0.484487 | 1.138375 | 0.319186 | 3.566497 | 0.000559 | 0.006564 | 1 |
| ENSG0000 | mucosal h | Inflamed | FAM174B   | protein_cc | chr15 | 93160673 | 93353114 | - | 4657 | 786.5561 | 0        | 0.369335 | 0.103582 | 3.565619 | 0.000561 | 0.00658  | 1 |
| ENSG0000 | mucosal h | Inflamed | RP4-813F1 | lincRNA    | chr7  | 1.41E+08 | 1.41E+08 | - | 2240 | 31.42005 | 0.019093 | 0.723917 | 0.203102 | 3.564308 | 0.000563 | 0.006606 | 1 |
| ENSG0000 | mucosal h | Inflamed | RP11-240E | pseudoger  | chr9  | 1.11E+08 | 1.11E+08 | + | 380  | 1.568019 | 0.661098 | 0.48097  | 0.134968 | 3.563572 | 0.000565 | 0.006618 | 1 |
| ENSG0000 | mucosal h | Inflamed | SLC36A1   | protein_cc | chr5  | 1.51E+08 | 1.51E+08 | + | 6980 | 3069.685 | 0        | 0.64517  | 0.181052 | 3.563444 | 0.000565 | 0.006618 | 1 |
| ENSG0000 | mucosal h | Inflamed | RP3-462E2 | lincRNA    | chr12 | 1.12E+08 | 1.12E+08 | + | 571  | 29.61337 | 0.033413 | 0.96582  | 0.271047 | 3.563287 | 0.000565 | 0.006618 | 1 |
| ENSG0000 | mucosal h | Inflamed | TMEM208   | protein_cc | chr16 | 67261006 | 67263181 | + | 1787 | 915.9021 | 0        | -0.41998 | 0.117863 | -3.56328 | 0.000565 | 0.006618 | 1 |
| ENSG0000 | mucosal h | Inflamed | ZCCHC14   | protein_cc | chr16 | 87439852 | 87525651 | - | 7390 | 2173.816 | 0        | 0.613283 | 0.17215  | 3.562488 | 0.000567 | 0.006632 | 1 |
| ENSG0000 | mucosal h | Inflamed | CACNB3    | protein_cc | chr12 | 49207577 | 49222724 | + | 7153 | 1438.85  | 0        | 0.393731 | 0.110541 | 3.561857 | 0.000568 | 0.006644 | 1 |
| ENSG0000 | mucosal h | Inflamed | YIF1B     | protein_cc | chr19 | 38795753 | 38807913 | - | 3184 | 1170.442 | 0        | -0.40446 | 0.113583 | -3.56092 | 0.00057  | 0.006662 | 1 |
| ENSG0000 | mucosal h | Inflamed | AC147651  | lincRNA    | chr7  | 560028   | 564869   | + | 3506 | 38.46539 | 0.002387 | 0.79837  | 0.224219 | 3.560662 | 0.00057  | 0.006663 | 1 |
| ENSG0000 | mucosal h | Inflamed | RP11-223I | sense_ove  | chr2  | 2.32E+08 | 2.32E+08 | + | 598  | 21.01432 | 0.033413 | 0.906546 | 0.254621 | 3.560366 | 0.000571 | 0.006663 | 1 |
| ENSG0000 | mucosal h | Inflamed | RETN      | protein_cc | chr19 | 7733930  | 7735334  | + | 514  | 5.023866 | 0.439141 | -0.99648 | 0.279898 | -3.56015 | 0.000571 | 0.006663 | 1 |
| ENSG0000 | mucosal h | Inflamed | MT-CO2    | protein_cc | chrM  | 7586     | 8269     | + | 684  | 850853.2 | 0        | 0.505816 | 0.142078 | 3.560129 | 0.000571 | 0.006663 | 1 |
| ENSG0000 | mucosal h | Inflamed | FAM124A   | protein_cc | chr13 | 51796503 | 51858377 | + | 5288 | 134.8735 | 0        | -0.82529 | 0.231817 | -3.56008 | 0.000571 | 0.006663 | 1 |
| ENSG0000 | mucosal h | Inflamed | AC016831  | lincRNA    | chr7  | 1.31E+08 | 1.31E+08 | + | 1616 | 50.53938 | 0        | 0.866812 | 0.243484 | 3.560041 | 0.000572 | 0.006663 | 1 |
| ENSG0000 | mucosal h | Inflamed | CCDC102A  | protein_cc | chr16 | 57546090 | 57570511 | - | 2582 | 262.6301 | 0        | -0.77923 | 0.218893 | -3.55987 | 0.000572 | 0.006663 | 1 |
| ENSG0000 | mucosal h | Inflamed | CTC-251D1 | antisense  | chr5  | 1.51E+08 | 1.51E+08 | + | 3317 | 34.84726 | 0.033413 | 0.921632 | 0.2589   | 3.5598   | 0.000572 | 0.006663 | 1 |
| ENSG0000 | mucosal h | Inflamed | RAB34     | protein_cc | chr17 | 27041299 | 27045447 | - | 3328 | 789.7422 | 0        | -0.6937  | 0.194897 | -3.55929 | 0.000573 | 0.006672 | 1 |
| ENSG0000 | mucosal h | Inflamed | KCNC1     | protein_cc | chr11 | 17756359 | 17804602 | + | 9842 | 13.84487 | 0.083532 | 0.967129 | 0.271731 | 3.559139 | 0.000573 | 0.006672 | 1 |
| ENSG0000 | mucosal h | Inflamed | EVI2A     | protein_cc | chr17 | 29644578 | 29648902 | - | 2071 | 216.2482 | 0        | -0.74602 | 0.209673 | -3.55801 | 0.000575 | 0.006694 | 1 |

|          |           |          |           |                  |          |          |   |       |          |          |          |          |          |          |          |   |
|----------|-----------|----------|-----------|------------------|----------|----------|---|-------|----------|----------|----------|----------|----------|----------|----------|---|
| ENSG0000 | mucosal h | Inflamed | INHBA     | protein_cc chr7  | 41724712 | 41742706 | - | 7532  | 410.969  | 0.016706 | -1.79791 | 0.505329 | -3.5579  | 0.000576 | 0.006694 | 1 |
| ENSG0000 | mucosal h | Inflamed | GAREM     | protein_cc chr18 | 29704840 | 30050447 | - | 7568  | 1167.604 | 0        | 0.614112 | 0.17262  | 3.55759  | 0.000576 | 0.006698 | 1 |
| ENSG0000 | mucosal h | Inflamed | GCKR      | protein_cc chr2  | 27719709 | 27746554 | + | 3149  | 15.31981 | 0.112172 | -0.94131 | 0.264699 | -3.55614 | 0.000579 | 0.006726 | 1 |
| ENSG0000 | mucosal h | Inflamed | GATA1     | protein_cc chrX  | 48644962 | 48652716 | + | 1498  | 28.6969  | 0.009547 | -0.78065 | 0.219524 | -3.55611 | 0.000579 | 0.006726 | 1 |
| ENSG0000 | mucosal h | Inflamed | AP000439  | lincRNA chr11    | 69291901 | 69294708 | - | 726   | 283.4893 | 0.009547 | 1.052939 | 0.296104 | 3.55598  | 0.000579 | 0.006726 | 1 |
| ENSG0000 | mucosal h | Inflamed | MT-TA     | Mt_tRNA chrM     | 5587     | 5655     | - | 69    | 6.608592 | 0.126492 | 0.629003 | 0.176918 | 3.555341 | 0.000581 | 0.006737 | 1 |
| ENSG0000 | mucosal h | Inflamed | CYP2S1    | protein_cc chr19 | 41698954 | 41713444 | + | 2874  | 3179.609 | 0        | 0.816428 | 0.229667 | 3.554826 | 0.000582 | 0.006744 | 1 |
| ENSG0000 | mucosal h | Inflamed | SERPINB4  | protein_cc chr18 | 61304493 | 61311532 | - | 2013  | 44.95465 | 0.484487 | -2.06249 | 0.580204 | -3.55477 | 0.000582 | 0.006744 | 1 |
| ENSG0000 | mucosal h | Inflamed | TPSG1     | protein_cc chr16 | 1271651  | 1275257  | - | 1255  | 967.1933 | 0        | 1.008754 | 0.283789 | 3.554597 | 0.000582 | 0.006745 | 1 |
| ENSG0000 | mucosal h | Inflamed | SGSM1     | protein_cc chr22 | 25202236 | 25323545 | + | 8507  | 176.7041 | 0.002387 | 0.791474 | 0.222678 | 3.554342 | 0.000583 | 0.006747 | 1 |
| ENSG0000 | mucosal h | Inflamed | RP11-1084 | antisense chr8   | 1.1E+08  | 1.1E+08  | - | 890   | 5.980907 | 0.295943 | -0.84279 | 0.237123 | -3.55424 | 0.000583 | 0.006747 | 1 |
| ENSG0000 | mucosal h | Inflamed | ZNF503-A5 | lincRNA chr10    | 77029577 | 77133258 | + | 3272  | 101.0621 | 0        | 0.815216 | 0.229385 | 3.553919 | 0.000583 | 0.006752 | 1 |
| ENSG0000 | mucosal h | Inflamed | ANO10     | protein_cc chr3  | 43396351 | 43733086 | - | 5287  | 2104     | 0        | 0.4036   | 0.113569 | 3.553793 | 0.000584 | 0.006752 | 1 |
| ENSG0000 | mucosal h | Inflamed | RP11-1691 | antisense chr11  | 72295616 | 72299023 | + | 664   | 10.27924 | 0.076372 | -0.72887 | 0.205152 | -3.55282 | 0.000586 | 0.006771 | 1 |
| ENSG0000 | mucosal h | Inflamed | IRF2BP2   | protein_cc chr1  | 2.35E+08 | 2.35E+08 | - | 4724  | 6213.501 | 0        | 0.398488 | 0.11219  | 3.551893 | 0.000587 | 0.006788 | 1 |
| ENSG0000 | mucosal h | Inflamed | RP11-4341 | pseudoger chr17  | 20458284 | 20462723 | - | 739   | 1.064439 | 0.74463  | 0.415222 | 0.116905 | 3.551799 | 0.000588 | 0.006788 | 1 |
| ENSG0000 | mucosal h | Inflamed | PFKFB3    | protein_cc chr10 | 6186881  | 6277495  | + | 5534  | 5324.506 | 0        | -0.99171 | 0.279243 | -3.55144 | 0.000588 | 0.006793 | 1 |
| ENSG0000 | mucosal h | Inflamed | INPP5J    | protein_cc chr22 | 31518717 | 31530682 | + | 4822  | 937.1838 | 0        | 0.935952 | 0.263581 | 3.550913 | 0.000589 | 0.006801 | 1 |
| ENSG0000 | mucosal h | Inflamed | RP11-5881 | antisense chr12  | 70861860 | 70932859 | + | 2407  | 18.01193 | 0.047733 | -0.8837  | 0.248868 | -3.55086 | 0.00059  | 0.006801 | 1 |
| ENSG0000 | mucosal h | Inflamed | AC022532  | protein_cc chr10 | 72194585 | 72196314 | + | 1730  | 8.367542 | 0.093079 | 0.645275 | 0.181741 | 3.550518 | 0.00059  | 0.006805 | 1 |
| ENSG0000 | mucosal h | Inflamed | SCP2      | protein_cc chr1  | 53392901 | 53517375 | + | 8305  | 4876.172 | 0        | 0.533513 | 0.150288 | 3.549936 | 0.000591 | 0.006816 | 1 |
| ENSG0000 | mucosal h | Inflamed | STC1      | protein_cc chr8  | 23699428 | 23712320 | - | 4149  | 723.8377 | 0.004773 | -1.73093 | 0.487673 | -3.54936 | 0.000593 | 0.006826 | 1 |
| ENSG0000 | mucosal h | Inflamed | LFNG      | protein_cc chr7  | 2552163  | 2568811  | + | 3372  | 2519.126 | 0        | 0.442768 | 0.124754 | 3.549121 | 0.000593 | 0.006829 | 1 |
| ENSG0000 | mucosal h | Inflamed | CD207     | protein_cc chr2  | 71057347 | 71062952 | - | 1867  | 41.24344 | 0.02148  | 0.994119 | 0.280155 | 3.548464 | 0.000594 | 0.006841 | 1 |
| ENSG0000 | mucosal h | Inflamed | RP11-8091 | antisense chr8   | 1.42E+08 | 1.42E+08 | - | 807   | 32.74702 | 0        | -0.60421 | 0.170285 | -3.54825 | 0.000595 | 0.006843 | 1 |
| ENSG0000 | mucosal h | Inflamed | MACROD2   | protein_cc chr20 | 13976015 | 16033842 | + | 11342 | 50.6253  | 0.019093 | 0.883723 | 0.249076 | 3.548004 | 0.000595 | 0.006845 | 1 |
| ENSG0000 | mucosal h | Inflamed | MMP28     | protein_cc chr17 | 34083268 | 34122711 | - | 3181  | 1821.632 | 0        | 0.827672 | 0.233339 | 3.547078 | 0.000597 | 0.006864 | 1 |
| ENSG0000 | mucosal h | Inflamed | SLC29A4   | protein_cc chr7  | 5314000  | 5346501  | + | 5811  | 353.8663 | 0        | 0.678219 | 0.191245 | 3.546342 | 0.000599 | 0.006878 | 1 |
| ENSG0000 | mucosal h | Inflamed | TMEM200   | protein_cc chr18 | 5882071  | 5895954  | - | 10638 | 111.1289 | 0.01432  | -0.92277 | 0.260259 | -3.5456  | 0.0006   | 0.006891 | 1 |
| ENSG0000 | mucosal h | Inflamed | HLA-DPB1  | protein_cc chr6  | 33043703 | 33054978 | + | 2862  | 7398.523 | 0        | -0.60318 | 0.170124 | -3.54552 | 0.0006   | 0.006891 | 1 |
| ENSG0000 | mucosal h | Inflamed | HYI-AS1   | antisense chr1   | 43919598 | 43922666 | + | 545   | 7.847255 | 0.050119 | 0.559177 | 0.157735 | 3.54505  | 0.000601 | 0.006898 | 1 |
| ENSG0000 | mucosal h | Inflamed | MAFA      | protein_cc chr8  | 1.45E+08 | 1.45E+08 | - | 2504  | 8.861575 | 0.152745 | 0.880709 | 0.248441 | 3.544951 | 0.000601 | 0.006898 | 1 |
| ENSG0000 | mucosal h | Inflamed | RP11-7681 | antisense chr4   | 1.54E+08 | 1.54E+08 | + | 2371  | 11.06921 | 0.114558 | -0.95356 | 0.26901  | -3.5447  | 0.000602 | 0.006898 | 1 |
| ENSG0000 | mucosal h | Inflamed | AC112721  | protein_cc chr2  | 2.38E+08 | 2.38E+08 | - | 588   | 1.856802 | 0.591885 | -0.60666 | 0.171147 | -3.54467 | 0.000602 | 0.006898 | 1 |
| ENSG0000 | mucosal h | Inflamed | TCP10     | protein_cc chr6  | 1.68E+08 | 1.68E+08 | - | 7695  | 1.890215 | 0.613365 | 0.535875 | 0.151191 | 3.544367 | 0.000603 | 0.006902 | 1 |
| ENSG0000 | mucosal h | Inflamed | RP11-3171 | lincRNA chr1     | 1.83E+08 | 1.83E+08 | + | 1376  | 4.813842 | 0.207637 | -0.7477  | 0.210999 | -3.54361 | 0.000604 | 0.006915 | 1 |
| ENSG0000 | mucosal h | Inflamed | RP11-10A1 | lincRNA chr8     | 9046521  | 9060364  | + | 875   | 8.183771 | 0.422434 | -1.15312 | 0.325412 | -3.54356 | 0.000604 | 0.006915 | 1 |
| ENSG0000 | mucosal h | Inflamed | A4GALT    | protein_cc chr22 | 43088127 | 43117304 | - | 2943  | 662.8687 | 0        | -0.84578 | 0.238737 | -3.54274 | 0.000606 | 0.006931 | 1 |
| ENSG0000 | mucosal h | Inflamed | THNSL1    | protein_cc chr10 | 25305587 | 25315593 | + | 3788  | 148.5298 | 0        | 0.609638 | 0.172156 | 3.541201 | 0.000609 | 0.006964 | 1 |
| ENSG0000 | mucosal h | Inflamed | OSMR      | protein_cc chr5  | 38845960 | 38945698 | + | 7174  | 1785.735 | 0        | -1.00178 | 0.282926 | -3.54078 | 0.00061  | 0.006968 | 1 |

|          |           |          |           |                  |          |          |   |      |          |          |          |          |          |          |          |   |
|----------|-----------|----------|-----------|------------------|----------|----------|---|------|----------|----------|----------|----------|----------|----------|----------|---|
| ENSG0000 | mucosal h | Inflamed | MSX2      | protein_cc chr5  | 1.74E+08 | 1.74E+08 | + | 2270 | 89.27446 | 0        | -0.9154  | 0.258531 | -3.54078 | 0.00061  | 0.006968 | 1 |
| ENSG0000 | mucosal h | Inflamed | SLC37A4   | protein_cc chr11 | 1.19E+08 | 1.19E+08 | - | 6186 | 1933.112 | 0        | 0.387453 | 0.109452 | 3.539952 | 0.000612 | 0.006984 | 1 |
| ENSG0000 | mucosal h | Inflamed | COQ7      | protein_cc chr16 | 19078921 | 19091417 | + | 4120 | 697.2363 | 0        | 0.389821 | 0.11013  | 3.539637 | 0.000612 | 0.006989 | 1 |
| ENSG0000 | mucosal h | Inflamed | MCMDC2    | protein_cc chr8  | 67782984 | 67834283 | + | 6354 | 19.50597 | 0.038186 | 0.79858  | 0.225631 | 3.539322 | 0.000613 | 0.006993 | 1 |
| ENSG0000 | mucosal h | Inflamed | CTD-2008F | lincRNA chr17    | 26559616 | 26562307 | - | 2692 | 12.32936 | 0.174224 | 0.874232 | 0.24712  | 3.537678 | 0.000616 | 0.007029 | 1 |
| ENSG0000 | mucosal h | Inflamed | CCDC167   | protein_cc chr6  | 37450696 | 37467698 | - | 619  | 296.3389 | 0        | -0.59268 | 0.167545 | -3.53745 | 0.000617 | 0.007029 | 1 |
| ENSG0000 | mucosal h | Inflamed | TNF       | protein_cc chr6  | 31543344 | 31546113 | + | 1676 | 253.4057 | 0        | -0.85968 | 0.243024 | -3.53741 | 0.000617 | 0.007029 | 1 |
| ENSG0000 | mucosal h | Inflamed | HHIPL2    | protein_cc chr1  | 2.23E+08 | 2.23E+08 | - | 3287 | 11.49642 | 0.071599 | 0.789543 | 0.223216 | 3.537117 | 0.000617 | 0.007033 | 1 |
| ENSG0000 | mucosal h | Inflamed | EPB41L4B  | protein_cc chr9  | 1.12E+08 | 1.12E+08 | - | 7879 | 4696.857 | 0        | 1.077711 | 0.304698 | 3.536987 | 0.000618 | 0.007033 | 1 |
| ENSG0000 | mucosal h | Inflamed | AC093642  | lincRNA chr2     | 2.43E+08 | 2.43E+08 | + | 2854 | 117.5394 | 0.004773 | 1.180332 | 0.333931 | 3.534655 | 0.000623 | 0.007085 | 1 |
| ENSG0000 | mucosal h | Inflamed | RMND5A    | protein_cc chr2  | 86947296 | 87005164 | + | 6804 | 2806.48  | 0        | 0.694806 | 0.196579 | 3.534481 | 0.000623 | 0.007086 | 1 |
| ENSG0000 | mucosal h | Inflamed | ABAT      | protein_cc chr16 | 8768422  | 8878432  | + | 9744 | 1102.709 | 0        | 0.666813 | 0.18869  | 3.533905 | 0.000624 | 0.007093 | 1 |
| ENSG0000 | mucosal h | Inflamed | FAM110C   | protein_cc chr2  | 38814    | 46870    | - | 3968 | 873.3317 | 0        | 0.86874  | 0.245831 | 3.533894 | 0.000624 | 0.007093 | 1 |
| ENSG0000 | mucosal h | Inflamed | KPTN      | protein_cc chr19 | 47978401 | 47987525 | - | 2124 | 215.8759 | 0        | -0.29245 | 0.082759 | -3.53376 | 0.000624 | 0.007093 | 1 |
| ENSG0000 | mucosal h | Inflamed | CYP4F12   | protein_cc chr19 | 15783567 | 15807984 | + | 5351 | 2043.845 | 0        | 1.017772 | 0.28802  | 3.533681 | 0.000625 | 0.007093 | 1 |
| ENSG0000 | mucosal h | Inflamed | CNTN3     | protein_cc chr3  | 74311719 | 74570291 | - | 5109 | 110.599  | 0.088305 | 1.482836 | 0.419763 | 3.53256  | 0.000627 | 0.007117 | 1 |
| ENSG0000 | mucosal h | Inflamed | XXbac-B46 | processed_chr22  | 18270418 | 18294263 | - | 4328 | 12.36277 | 0.090692 | 0.798431 | 0.226059 | 3.531955 | 0.000628 | 0.007128 | 1 |
| ENSG0000 | mucosal h | Inflamed | GRHL3     | protein_cc chr1  | 24645812 | 24690972 | + | 3940 | 87.02387 | 0.016706 | -1.22466 | 0.346823 | -3.53109 | 0.00063  | 0.007145 | 1 |
| ENSG0000 | mucosal h | Inflamed | GRIN3B    | protein_cc chr19 | 1000418  | 1009731  | + | 3281 | 4.465394 | 0.267303 | -0.71554 | 0.202669 | -3.53057 | 0.000631 | 0.007153 | 1 |
| ENSG0000 | mucosal h | Inflamed | TMEM9B    | protein_cc chr11 | 8968841  | 8986558  | - | 3064 | 2067.239 | 0        | 0.408108 | 0.115594 | 3.530532 | 0.000631 | 0.007153 | 1 |
| ENSG0000 | mucosal h | Inflamed | ATF4      | protein_cc chr22 | 39915700 | 39918691 | + | 2515 | 10135.8  | 0        | -0.33165 | 0.093951 | -3.53    | 0.000632 | 0.007162 | 1 |
| ENSG0000 | mucosal h | Inflamed | RP13-494C | lincRNA chr4     | 25866503 | 25871172 | - | 762  | 1.852029 | 0.577566 | -0.56835 | 0.161025 | -3.52959 | 0.000633 | 0.007164 | 1 |
| ENSG0000 | mucosal h | Inflamed | CCDC134   | protein_cc chr22 | 42196683 | 42222303 | + | 1270 | 231.3484 | 0        | -0.34996 | 0.099155 | -3.52942 | 0.000634 | 0.007164 | 1 |
| ENSG0000 | mucosal h | Inflamed | LGALS1    | protein_cc chr2  | 64681103 | 64688515 | + | 4003 | 1109.031 | 0        | 0.626793 | 0.177595 | 3.52933  | 0.000634 | 0.007164 | 1 |
| ENSG0000 | mucosal h | Inflamed | ATOX1     | protein_cc chr5  | 1.51E+08 | 1.51E+08 | - | 5239 | 947      | 0        | -0.40297 | 0.114183 | -3.52919 | 0.000634 | 0.007164 | 1 |
| ENSG0000 | mucosal h | Inflamed | MCOLN2    | protein_cc chr1  | 85391268 | 85462796 | - | 3440 | 463.2673 | 0.002387 | 0.920993 | 0.260965 | 3.529186 | 0.000634 | 0.007164 | 1 |
| ENSG0000 | mucosal h | Inflamed | TGFB1     | protein_cc chr19 | 41807492 | 41859816 | - | 3238 | 3113.365 | 0        | -0.73956 | 0.209562 | -3.52908 | 0.000634 | 0.007164 | 1 |
| ENSG0000 | mucosal h | Inflamed | GNG11     | protein_cc chr7  | 93551011 | 93557922 | + | 3055 | 617.4153 | 0        | -0.76305 | 0.216221 | -3.52905 | 0.000634 | 0.007164 | 1 |
| ENSG0000 | mucosal h | Inflamed | CD93      | protein_cc chr20 | 23059986 | 23066977 | - | 6708 | 4800.926 | 0        | -0.86036 | 0.243909 | -3.5274  | 0.000638 | 0.0072   | 1 |
| ENSG0000 | mucosal h | Inflamed | COQ9      | protein_cc chr16 | 57481337 | 57495187 | + | 4324 | 2032.628 | 0        | 0.366487 | 0.103911 | 3.526933 | 0.000639 | 0.007209 | 1 |
| ENSG0000 | mucosal h | Inflamed | NEK3      | protein_cc chr13 | 52706775 | 52733996 | - | 4272 | 731.6874 | 0        | 0.714489 | 0.202684 | 3.525129 | 0.000643 | 0.007249 | 1 |
| ENSG0000 | mucosal h | Inflamed | FAM89A    | protein_cc chr1  | 2.31E+08 | 2.31E+08 | - | 2394 | 120.9284 | 0        | -0.64666 | 0.183488 | -3.52427 | 0.000645 | 0.007267 | 1 |
| ENSG0000 | mucosal h | Inflamed | C16orf54  | protein_cc chr16 | 29753784 | 29757327 | - | 2585 | 606.716  | 0        | -0.70984 | 0.201434 | -3.52395 | 0.000645 | 0.00727  | 1 |
| ENSG0000 | mucosal h | Inflamed | DKK1      | protein_cc chr10 | 54074056 | 54077802 | + | 2206 | 36.27924 | 0.059666 | -1.44554 | 0.41021  | -3.5239  | 0.000645 | 0.00727  | 1 |
| ENSG0000 | mucosal h | Inflamed | PCK2      | protein_cc chr14 | 24563262 | 24579807 | + | 4189 | 4324.537 | 0        | 0.542906 | 0.154086 | 3.523394 | 0.000646 | 0.007277 | 1 |
| ENSG0000 | mucosal h | Inflamed | RP11-1101 | antisense chr5   | 1.77E+08 | 1.77E+08 | + | 431  | 2.093079 | 0.5179   | 0.585582 | 0.166203 | 3.523284 | 0.000647 | 0.007277 | 1 |
| ENSG0000 | mucosal h | Inflamed | RP11-83N  | lincRNA chr9     | 1.39E+08 | 1.39E+08 | - | 1334 | 18.99284 | 0.004773 | 0.522736 | 0.14837  | 3.523204 | 0.000647 | 0.007277 | 1 |
| ENSG0000 | mucosal h | Inflamed | AC078883  | antisense chr2   | 1.73E+08 | 1.73E+08 | - | 558  | 10.79236 | 0.042959 | 0.646483 | 0.18353  | 3.5225   | 0.000648 | 0.007291 | 1 |
| ENSG0000 | mucosal h | Inflamed | ATP8B3    | protein_cc chr19 | 1782074  | 1812275  | - | 7011 | 65.96659 | 0.004773 | -0.63709 | 0.180896 | -3.52188 | 0.00065  | 0.007303 | 1 |
| ENSG0000 | mucosal h | Inflamed | TRIM10    | protein_cc chr6  | 30119722 | 30128711 | - | 3546 | 304.9952 | 0.00716  | 0.940261 | 0.266992 | 3.521678 | 0.00065  | 0.007305 | 1 |

|          |           |          |           |            |       |          |          |   |       |          |          |          |          |          |          |          |   |
|----------|-----------|----------|-----------|------------|-------|----------|----------|---|-------|----------|----------|----------|----------|----------|----------|----------|---|
| ENSG0000 | mucosal h | Inflamed | TSC22D1   | protein_cc | chr13 | 45007655 | 45151283 | - | 7159  | 9495.809 | 0        | 0.474991 | 0.134912 | 3.52074  | 0.000652 | 0.007325 | 1 |
| ENSG0000 | mucosal h | Inflamed | KLK8      | protein_cc | chr19 | 51499263 | 51505967 | - | 1865  | 32.44391 | 0.599045 | -1.82686 | 0.518932 | -3.52041 | 0.000653 | 0.00733  | 1 |
| ENSG0000 | mucosal h | Inflamed | MPV17L2   | protein_cc | chr19 | 18303992 | 18307758 | + | 2135  | 455.9666 | 0        | -0.34034 | 0.096686 | -3.52004 | 0.000654 | 0.007336 | 1 |
| ENSG0000 | mucosal h | Inflamed | RP11-38P2 | lincRNA    | chr3  | 1.53E+08 | 1.53E+08 | + | 2050  | 202.9427 | 0.004773 | 1.170007 | 0.332448 | 3.519373 | 0.000655 | 0.007349 | 1 |
| ENSG0000 | mucosal h | Inflamed | U82695.1C | lincRNA    | chrX  | 1.53E+08 | 1.53E+08 | + | 2725  | 57.50597 | 0.009547 | -0.75371 | 0.21417  | -3.51922 | 0.000656 | 0.00735  | 1 |
| ENSG0000 | mucosal h | Inflamed | CPA4      | protein_cc | chr7  | 1.3E+08  | 1.3E+08  | + | 3958  | 2.374702 | 0.541766 | -0.71748 | 0.203909 | -3.51865 | 0.000657 | 0.007361 | 1 |
| ENSG0000 | mucosal h | Inflamed | RP11-446M | lincRNA    | chr12 | 46931285 | 47046333 | + | 448   | 11.58234 | 0.00716  | -0.55948 | 0.159016 | -3.51842 | 0.000657 | 0.007363 | 1 |
| ENSG0000 | mucosal h | Inflamed | IBA57     | protein_cc | chr1  | 2.28E+08 | 2.28E+08 | + | 10219 | 853.6134 | 0        | 0.300882 | 0.085519 | 3.518316 | 0.000658 | 0.007363 | 1 |
| ENSG0000 | mucosal h | Inflamed | 06-Sep    | protein_cc | chrX  | 1.19E+08 | 1.19E+08 | - | 6553  | 2034.036 | 0        | -0.65064 | 0.184979 | -3.51739 | 0.00066  | 0.007382 | 1 |
| ENSG0000 | mucosal h | Inflamed | PDE4B     | protein_cc | chr1  | 66258197 | 66840259 | + | 8641  | 1142.138 | 0        | -1.05409 | 0.299709 | -3.51704 | 0.00066  | 0.007388 | 1 |
| ENSG0000 | mucosal h | Inflamed | RNU4-78P  | snRNA      | chr3  | 42263332 | 42263457 | + | 126   | 3.536993 | 0.288783 | 0.605373 | 0.172163 | 3.516269 | 0.000662 | 0.007404 | 1 |
| ENSG0000 | mucosal h | Inflamed | IGHV3-65  | IG_V_pseu  | chr14 | 1.07E+08 | 1.07E+08 | - | 341   | 2.873508 | 0.613365 | -0.84967 | 0.241669 | -3.51584 | 0.000663 | 0.007407 | 1 |
| ENSG0000 | mucosal h | Inflamed | FUT8      | protein_cc | chr14 | 65877310 | 66210839 | + | 6889  | 1356.396 | 0        | -0.6341  | 0.180357 | -3.51581 | 0.000663 | 0.007407 | 1 |
| ENSG0000 | mucosal h | Inflamed | FBXO10    | protein_cc | chr9  | 37510889 | 37588871 | - | 6059  | 227.0907 | 0        | -0.5191  | 0.147654 | -3.51568 | 0.000663 | 0.007407 | 1 |
| ENSG0000 | mucosal h | Inflamed | KCNMA1    | protein_cc | chr10 | 78629359 | 79398353 | - | 18808 | 1517.184 | 0        | 0.624741 | 0.177704 | 3.515619 | 0.000664 | 0.007407 | 1 |
| ENSG0000 | mucosal h | Inflamed | ANKDD1B   | protein_cc | chr5  | 74907284 | 74967671 | + | 3287  | 115.1671 | 0.004773 | 0.932186 | 0.265269 | 3.514121 | 0.000667 | 0.007439 | 1 |
| ENSG0000 | mucosal h | Inflamed | ZNF233    | protein_cc | chr19 | 44754318 | 44779470 | + | 4233  | 28.51074 | 0.023866 | 0.751687 | 0.21391  | 3.514034 | 0.000667 | 0.007439 | 1 |
| ENSG0000 | mucosal h | Inflamed | AC069213  | pseudoger  | chr3  | 1.95E+08 | 1.95E+08 | + | 1680  | 331.8401 | 0.004773 | 1.002092 | 0.285173 | 3.513982 | 0.000667 | 0.007439 | 1 |
| ENSG0000 | mucosal h | Inflamed | ZNF888    | lincRNA    | chr19 | 53418449 | 53426723 | - | 551   | 33.72792 | 0.02864  | 0.870015 | 0.247658 | 3.512976 | 0.000669 | 0.00746  | 1 |
| ENSG0000 | mucosal h | Inflamed | RN7SL67P  | misc_RNA   | chr12 | 19456414 | 19456710 | + | 297   | 0.789976 | 0.792363 | 0.39113  | 0.111352 | 3.512559 | 0.00067  | 0.007468 | 1 |
| ENSG0000 | mucosal h | Inflamed | AAMDC     | protein_cc | chr11 | 77532155 | 77629478 | + | 1943  | 226.4726 | 0        | 0.358376 | 0.102045 | 3.511946 | 0.000672 | 0.00748  | 1 |
| ENSG0000 | mucosal h | Inflamed | RP4-728Dz | antisense  | chr1  | 36035414 | 36043330 | - | 1030  | 26.73986 | 0.011933 | -0.77397 | 0.220422 | -3.5113  | 0.000673 | 0.007493 | 1 |
| ENSG0000 | mucosal h | Inflamed | RP11-390E | antisense  | chr7  | 1.23E+08 | 1.23E+08 | + | 2099  | 237.179  | 0        | 0.605757 | 0.172569 | 3.510232 | 0.000676 | 0.007514 | 1 |
| ENSG0000 | mucosal h | Inflamed | DTX1      | protein_cc | chr12 | 1.13E+08 | 1.14E+08 | + | 4387  | 490.5704 | 0        | -0.91139 | 0.259646 | -3.51011 | 0.000676 | 0.007514 | 1 |
| ENSG0000 | mucosal h | Inflamed | HNMT      | protein_cc | chr2  | 1.39E+08 | 1.39E+08 | + | 4752  | 977.3532 | 0        | 0.49725  | 0.141668 | 3.509982 | 0.000676 | 0.007514 | 1 |
| ENSG0000 | mucosal h | Inflamed | CTD-2350C | antisense  | chr17 | 26729128 | 26731067 | + | 1940  | 35.71599 | 0.02148  | 0.706127 | 0.201184 | 3.509859 | 0.000676 | 0.007514 | 1 |
| ENSG0000 | mucosal h | Inflamed | C2orf66   | protein_cc | chr2  | 1.98E+08 | 1.98E+08 | - | 1669  | 7.073986 | 0.176611 | 0.724053 | 0.206294 | 3.509813 | 0.000677 | 0.007514 | 1 |
| ENSG0000 | mucosal h | Inflamed | RP11-100E | lincRNA    | chr15 | 38276967 | 38354541 | + | 2448  | 6.995227 | 0.412888 | -1.10743 | 0.315601 | -3.50895 | 0.000678 | 0.007527 | 1 |
| ENSG0000 | mucosal h | Inflamed | FCRLA     | protein_cc | chr1  | 1.62E+08 | 1.62E+08 | + | 3275  | 334.8831 | 0.002387 | -1.19021 | 0.339194 | -3.50893 | 0.000679 | 0.007527 | 1 |
| ENSG0000 | mucosal h | Inflamed | CTD-2540E | lincRNA    | chr19 | 33795942 | 33800293 | + | 404   | 9.699284 | 0.085919 | 0.658715 | 0.187726 | 3.50891  | 0.000679 | 0.007527 | 1 |
| ENSG0000 | mucosal h | Inflamed | CTNNAP1   | pseudoger  | chr5  | 1.15E+08 | 1.15E+08 | - | 2728  | 20.20286 | 0.040573 | 0.898606 | 0.256118 | 3.508556 | 0.000679 | 0.007532 | 1 |
| ENSG0000 | mucosal h | Inflamed | SELM      | protein_cc | chr22 | 31500758 | 31516055 | - | 3187  | 1417.453 | 0        | -0.70251 | 0.200234 | -3.50848 | 0.00068  | 0.007532 | 1 |
| ENSG0000 | mucosal h | Inflamed | ANKRD36E  | pseudoger  | chr2  | 89065324 | 89106126 | + | 8039  | 1058.599 | 0        | -1.35927 | 0.387498 | -3.50781 | 0.000681 | 0.007543 | 1 |
| ENSG0000 | mucosal h | Inflamed | snoU13    | snoRNA     | chr3  | 32214148 | 32214252 | + | 105   | 1.601432 | 0.591885 | 0.47331  | 0.134931 | 3.507792 | 0.000681 | 0.007543 | 1 |
| ENSG0000 | mucosal h | Inflamed | RP11-20G  | lincRNA    | chr15 | 99967214 | 99971233 | - | 395   | 6.186158 | 0.188544 | 0.698278 | 0.199129 | 3.506664 | 0.000684 | 0.007567 | 1 |
| ENSG0000 | mucosal h | Inflamed | TSPAN6    | protein_cc | chrX  | 99883667 | 99894988 | - | 2968  | 1550.253 | 0        | 0.641868 | 0.183046 | 3.506597 | 0.000684 | 0.007567 | 1 |
| ENSG0000 | mucosal h | Inflamed | TBX21     | protein_cc | chr17 | 45810610 | 45823485 | + | 2614  | 119.5537 | 0.009547 | -0.75299 | 0.214788 | -3.50574 | 0.000686 | 0.007585 | 1 |
| ENSG0000 | mucosal h | Inflamed | SAMD14    | protein_cc | chr17 | 48187404 | 48207246 | - | 7016  | 214.5346 | 0        | -0.72809 | 0.207716 | -3.50521 | 0.000687 | 0.007595 | 1 |
| ENSG0000 | mucosal h | Inflamed | BTG2      | protein_cc | chr1  | 2.03E+08 | 2.03E+08 | + | 2757  | 11164.23 | 0        | -0.69522 | 0.198364 | -3.50478 | 0.000688 | 0.007601 | 1 |
| ENSG0000 | mucosal h | Inflamed | SLC39A5   | protein_cc | chr12 | 56623833 | 56631630 | + | 2903  | 4023.012 | 0        | 1.156958 | 0.330113 | 3.504733 | 0.000688 | 0.007601 | 1 |

|          |           |          |            |               |       |          |          |   |       |          |          |          |          |          |          |          |   |
|----------|-----------|----------|------------|---------------|-------|----------|----------|---|-------|----------|----------|----------|----------|----------|----------|----------|---|
| ENSG0000 | mucosal h | Inflamed | CDKN2C     | protein_cc    | chr1  | 51426417 | 51440305 | + | 3318  | 458.9332 | 0        | -0.38609 | 0.110172 | -3.50445 | 0.000689 | 0.007605 | 1 |
| ENSG0000 | mucosal h | Inflamed | YJEFN3     | protein_cc    | chr19 | 19627036 | 19648390 | + | 3683  | 199.8592 | 0.004773 | 0.902041 | 0.257419 | 3.50417  | 0.000689 | 0.007609 | 1 |
| ENSG0000 | mucosal h | Inflamed | KTI12      | protein_cc    | chr1  | 52497775 | 52499488 | - | 1714  | 313.4582 | 0        | -0.24904 | 0.07108  | -3.50364 | 0.000691 | 0.007619 | 1 |
| ENSG0000 | mucosal h | Inflamed | RP11-362L  | sense_intr    | chr14 | 1.01E+08 | 1.01E+08 | + | 606   | 1.653938 | 0.553699 | 0.490566 | 0.140029 | 3.50332  | 0.000691 | 0.007624 | 1 |
| ENSG0000 | mucosal h | Inflamed | RP11-738C  | pseudoger     | chr11 | 55635045 | 55642013 | - | 1582  | 1.873508 | 0.625298 | 0.411286 | 0.117414 | 3.502861 | 0.000692 | 0.007629 | 1 |
| ENSG0000 | mucosal h | Inflamed | SGK223     | protein_cc    | chr8  | 8175258  | 8244008  | - | 4892  | 1724.205 | 0        | 0.687186 | 0.196182 | 3.502791 | 0.000693 | 0.007629 | 1 |
| ENSG0000 | mucosal h | Inflamed | LINC00974  | lincRNA       | chr17 | 39705858 | 39710747 | - | 2141  | 33.99761 | 0.045346 | 1.081823 | 0.30885  | 3.502744 | 0.000693 | 0.007629 | 1 |
| ENSG0000 | mucosal h | Inflamed | AKIP1      | protein_cc    | chr11 | 8932686  | 8941631  | + | 2300  | 370.5847 | 0        | -0.29057 | 0.082959 | -3.50257 | 0.000693 | 0.00763  | 1 |
| ENSG0000 | mucosal h | Inflamed | RPS6KA6    | protein_cc    | chrX  | 83318984 | 83442933 | - | 2890  | 110.0286 | 0.011933 | 1.111163 | 0.317264 | 3.502328 | 0.000694 | 0.007633 | 1 |
| ENSG0000 | mucosal h | Inflamed | ARR3       | protein_cc    | chrX  | 69488155 | 69501690 | + | 1719  | 3.591885 | 0.505967 | 0.717323 | 0.20483  | 3.502043 | 0.000694 | 0.007637 | 1 |
| ENSG0000 | mucosal h | Inflamed | RP11-439C  | lincRNA       | chr8  | 1922984  | 1923480  | + | 497   | 13.65394 | 0.062053 | 0.780813 | 0.222978 | 3.501751 | 0.000695 | 0.007642 | 1 |
| ENSG0000 | mucosal h | Inflamed | ERBB3      | protein_cc    | chr12 | 56473641 | 56497289 | + | 8651  | 11497.56 | 0        | 0.879392 | 0.251186 | 3.500963 | 0.000697 | 0.007659 | 1 |
| ENSG0000 | mucosal h | Inflamed | RP11-181I  | processed_chr | 10    | 1.04E+08 | 1.04E+08 | + | 5660  | 548.5442 | 0        | 0.509593 | 0.145572 | 3.500626 | 0.000698 | 0.007664 | 1 |
| ENSG0000 | mucosal h | Inflamed | GPR12      | protein_cc    | chr13 | 27329341 | 27334922 | - | 5294  | 2.658711 | 0.556086 | 0.770104 | 0.220009 | 3.500335 | 0.000698 | 0.007668 | 1 |
| ENSG0000 | mucosal h | Inflamed | TPTE2P5    | pseudoger     | chr13 | 41396432 | 41495890 | - | 1343  | 14.78282 | 0.054893 | 0.828491 | 0.236717 | 3.499924 | 0.000699 | 0.007676 | 1 |
| ENSG0000 | mucosal h | Inflamed | GBGT1      | protein_cc    | chr9  | 1.36E+08 | 1.36E+08 | - | 3708  | 292.1575 | 0        | -0.5112  | 0.146067 | -3.49972 | 0.0007   | 0.007678 | 1 |
| ENSG0000 | mucosal h | Inflamed | RP11-807I  | pseudoger     | chr11 | 71883483 | 71889086 | + | 829   | 4.205251 | 0.315036 | 0.698657 | 0.199669 | 3.499073 | 0.000701 | 0.007691 | 1 |
| ENSG0000 | mucosal h | Inflamed | AC011747   | lincRNA       | chr2  | 8683722  | 8715631  | - | 1036  | 12.31981 | 0.064439 | 0.801081 | 0.228961 | 3.498761 | 0.000702 | 0.007696 | 1 |
| ENSG0000 | mucosal h | Inflamed | FAM25A     | protein_cc    | chr10 | 88780063 | 88784487 | + | 345   | 2.386635 | 0.708831 | -0.92539 | 0.264553 | -3.49795 | 0.000704 | 0.007713 | 1 |
| ENSG0000 | mucosal h | Inflamed | EXD3       | protein_cc    | chr9  | 1.4E+08  | 1.4E+08  | - | 7626  | 898.6683 | 0        | 0.426961 | 0.122072 | 3.49762  | 0.000705 | 0.007719 | 1 |
| ENSG0000 | mucosal h | Inflamed | MAMDC2     | protein_cc    | chr9  | 72658497 | 72841886 | + | 3854  | 289.8878 | 0.009547 | 1.28798  | 0.368265 | 3.497428 | 0.000705 | 0.00772  | 1 |
| ENSG0000 | mucosal h | Inflamed | BDH1       | protein_cc    | chr3  | 1.97E+08 | 1.97E+08 | - | 9112  | 3890.358 | 0        | 0.712304 | 0.20368  | 3.497169 | 0.000706 | 0.007724 | 1 |
| ENSG0000 | mucosal h | Inflamed | RP1-278O   | lincRNA       | chr20 | 10733738 | 10734614 | + | 438   | 60.84487 | 0.011933 | 0.937798 | 0.268345 | 3.49475  | 0.000711 | 0.007783 | 1 |
| ENSG0000 | mucosal h | Inflamed | CTD-2616J  | protein_cc    | chr19 | 51891543 | 51893828 | - | 1447  | 3.868735 | 0.260143 | -0.57335 | 0.164106 | -3.49379 | 0.000714 | 0.007805 | 1 |
| ENSG0000 | mucosal h | Inflamed | HLA-DQA1   | protein_cc    | chr6  | 32595956 | 32614839 | + | 6927  | 3690.16  | 0        | -0.71912 | 0.205953 | -3.49166 | 0.000719 | 0.007857 | 1 |
| ENSG0000 | mucosal h | Inflamed | MICAL3     | protein_cc    | chr22 | 18270415 | 18507325 | - | 22361 | 2615.687 | 0        | 0.667951 | 0.191313 | 3.491401 | 0.000719 | 0.007861 | 1 |
| ENSG0000 | mucosal h | Inflamed | MYBPC1     | protein_cc    | chr12 | 1.02E+08 | 1.02E+08 | + | 7385  | 31.71599 | 0.059666 | 1.397324 | 0.400236 | 3.491247 | 0.00072  | 0.007861 | 1 |
| ENSG0000 | mucosal h | Inflamed | STEAP4     | protein_cc    | chr7  | 87905744 | 87936206 | - | 5708  | 462.6468 | 0.004773 | -1.18539 | 0.339616 | -3.49039 | 0.000722 | 0.007878 | 1 |
| ENSG0000 | mucosal h | Inflamed | HOXA3      | protein_cc    | chr7  | 27145803 | 27192200 | - | 4306  | 551.6945 | 0        | 0.788903 | 0.226024 | 3.490345 | 0.000722 | 0.007878 | 1 |
| ENSG0000 | mucosal h | Inflamed | CCDC109B   | protein_cc    | chr4  | 1.1E+08  | 1.11E+08 | + | 3558  | 421.2339 | 0        | -0.57681 | 0.165285 | -3.48977 | 0.000723 | 0.007887 | 1 |
| ENSG0000 | mucosal h | Inflamed | RP11-48B   | lincRNA       | chr8  | 81453535 | 81455339 | + | 1805  | 22.36038 | 0.038186 | 0.96725  | 0.277168 | 3.48976  | 0.000723 | 0.007887 | 1 |
| ENSG0000 | mucosal h | Inflamed | FGF17      | protein_cc    | chr8  | 21899909 | 21906320 | + | 3287  | 6.01432  | 0.178998 | 0.679675 | 0.194778 | 3.489491 | 0.000724 | 0.007891 | 1 |
| ENSG0000 | mucosal h | Inflamed | ISL1       | protein_cc    | chr5  | 50678921 | 50690564 | + | 3216  | 63.42482 | 0.00716  | 0.996394 | 0.285588 | 3.488925 | 0.000725 | 0.007903 | 1 |
| ENSG0000 | mucosal h | Inflamed | CACNA1D    | protein_cc    | chr3  | 53528683 | 53847760 | + | 11218 | 398.7064 | 0        | 0.863898 | 0.247636 | 3.488582 | 0.000726 | 0.007908 | 1 |
| ENSG0000 | mucosal h | Inflamed | LUZP2      | protein_cc    | chr11 | 24518516 | 25104150 | + | 8795  | 25.06921 | 0.109785 | 1.062663 | 0.304648 | 3.488171 | 0.000727 | 0.007916 | 1 |
| ENSG0000 | mucosal h | Inflamed | ADAMTS1    | protein_cc    | chr15 | 1.01E+08 | 1.01E+08 | - | 7800  | 157.6778 | 0.002387 | 0.562568 | 0.161287 | 3.487989 | 0.000728 | 0.007916 | 1 |
| ENSG0000 | mucosal h | Inflamed | IGHVII-60- | IG_V_pseu     | chr14 | 1.07E+08 | 1.07E+08 | - | 256   | 1.558473 | 0.618138 | -0.54164 | 0.155291 | -3.48793 | 0.000728 | 0.007916 | 1 |
| ENSG0000 | mucosal h | Inflamed | RP11-760I  | lincRNA       | chr8  | 1.21E+08 | 1.21E+08 | + | 752   | 27.79475 | 0.0358   | 0.787958 | 0.225926 | 3.487678 | 0.000728 | 0.007919 | 1 |
| ENSG0000 | mucosal h | Inflamed | AC083949   | antisense     | chr2  | 42370378 | 42397441 | - | 947   | 10.81623 | 0.076372 | -0.79162 | 0.226998 | -3.48736 | 0.000729 | 0.007924 | 1 |
| ENSG0000 | mucosal h | Inflamed | AC012146   | processed_chr | 17    | 5014763  | 5017674  | + | 856   | 41.2506  | 0        | -0.632   | 0.181244 | -3.48701 | 0.00073  | 0.00793  | 1 |



|          |           |          |           |            |       |          |          |   |      |          |          |          |          |          |          |          |   |
|----------|-----------|----------|-----------|------------|-------|----------|----------|---|------|----------|----------|----------|----------|----------|----------|----------|---|
| ENSG0000 | mucosal h | Inflamed | ST8SIA4   | protein_cc | chr5  | 1E+08    | 1E+08    | - | 7794 | 507.1098 | 0        | -0.83665 | 0.239972 | -3.48645 | 0.000731 | 0.007942 | 1 |
| ENSG0000 | mucosal h | Inflamed | CELA1     | protein_cc | chr12 | 51722227 | 51740463 | - | 952  | 2.486874 | 0.448687 | -0.5382  | 0.154381 | -3.4862  | 0.000732 | 0.007945 | 1 |
| ENSG0000 | mucosal h | Inflamed | RP1-249H  | lincRNA    | chr6  | 1.14E+08 | 1.14E+08 | - | 2755 | 88.66587 | 0.009547 | 1.1249   | 0.322693 | 3.485973 | 0.000732 | 0.007948 | 1 |
| ENSG0000 | mucosal h | Inflamed | ANKRD27   | protein_cc | chr19 | 33087913 | 33167503 | - | 7855 | 1465.955 | 0        | 0.463557 | 0.132987 | 3.485727 | 0.000733 | 0.007951 | 1 |
| ENSG0000 | mucosal h | Inflamed | KCNAB2    | protein_cc | chr1  | 6051526  | 6161253  | + | 9253 | 1534.241 | 0        | -0.63975 | 0.183582 | -3.48483 | 0.000735 | 0.007971 | 1 |
| ENSG0000 | mucosal h | Inflamed | RP11-290F | lincRNA    | chr11 | 6223131  | 6224483  | - | 1353 | 111.401  | 0.00716  | 1.215026 | 0.348735 | 3.484093 | 0.000737 | 0.007988 | 1 |
| ENSG0000 | mucosal h | Inflamed | RN7SL663I | misc_RNA   | chr19 | 38690874 | 38691170 | + | 297  | 7.878282 | 0.136038 | 0.696108 | 0.199823 | 3.483618 | 0.000738 | 0.007997 | 1 |
| ENSG0000 | mucosal h | Inflamed | RP11-138A | lincRNA    | chr7  | 1.31E+08 | 1.31E+08 | + | 3198 | 23.64678 | 0.078759 | 1.133351 | 0.325445 | 3.482463 | 0.000741 | 0.008024 | 1 |
| ENSG0000 | mucosal h | Inflamed | LEF1      | protein_cc | chr4  | 1.09E+08 | 1.09E+08 | - | 5361 | 455.8616 | 0        | -0.6656  | 0.191184 | -3.48146 | 0.000744 | 0.008048 | 1 |
| ENSG0000 | mucosal h | Inflamed | AIF1      | protein_cc | chr6  | 31582961 | 31584798 | + | 1276 | 1017.535 | 0        | -0.67492 | 0.193926 | -3.48029 | 0.000746 | 0.008076 | 1 |
| ENSG0000 | mucosal h | Inflamed | AD000684  | sense_intr | chr19 | 35753749 | 35755707 | + | 1016 | 30.82578 | 0.040573 | 0.804541 | 0.231179 | 3.480163 | 0.000747 | 0.008076 | 1 |
| ENSG0000 | mucosal h | Inflamed | CTC-428G  | antisense  | chr5  | 1.15E+08 | 1.15E+08 | + | 944  | 21.40334 | 0        | 0.440484 | 0.126624 | 3.478679 | 0.00075  | 0.008113 | 1 |
| ENSG0000 | mucosal h | Inflamed | CLEC17A   | protein_cc | chr19 | 14693896 | 14721969 | + | 2265 | 126.2411 | 0.026253 | -1.32758 | 0.381696 | -3.47809 | 0.000752 | 0.008125 | 1 |
| ENSG0000 | mucosal h | Inflamed | HTRA1     | protein_cc | chr10 | 1.24E+08 | 1.24E+08 | + | 2120 | 1613.315 | 0        | -0.80284 | 0.230877 | -3.47734 | 0.000754 | 0.008142 | 1 |
| ENSG0000 | mucosal h | Inflamed | RP11-421E | sense_intr | chr17 | 49326940 | 49329109 | - | 2170 | 1.078759 | 0.75895  | 0.532853 | 0.153245 | 3.477121 | 0.000754 | 0.008145 | 1 |
| ENSG0000 | mucosal h | Inflamed | RP11-325F | lincRNA    | chr7  | 1.05E+08 | 1.05E+08 | + | 1034 | 65.37232 | 0        | -0.61335 | 0.176408 | -3.47688 | 0.000755 | 0.008146 | 1 |
| ENSG0000 | mucosal h | Inflamed | RNU6-353  | snRNA      | chr15 | 43994561 | 43994668 | + | 108  | 1.923628 | 0.565632 | 0.516694 | 0.148613 | 3.476787 | 0.000755 | 0.008146 | 1 |
| ENSG0000 | mucosal h | Inflamed | TNK2-AS1  | antisense  | chr3  | 1.96E+08 | 1.96E+08 | + | 2096 | 9.918854 | 0.073986 | -0.71992 | 0.207071 | -3.47671 | 0.000755 | 0.008146 | 1 |
| ENSG0000 | mucosal h | Inflamed | SPON2     | protein_cc | chr4  | 1160720  | 1202750  | - | 6013 | 2675.365 | 0        | -0.78278 | 0.225163 | -3.47649 | 0.000756 | 0.008148 | 1 |
| ENSG0000 | mucosal h | Inflamed | IGSF3     | protein_cc | chr1  | 1.17E+08 | 1.17E+08 | - | 7388 | 2266.685 | 0        | 0.751409 | 0.216155 | 3.476242 | 0.000757 | 0.008152 | 1 |
| ENSG0000 | mucosal h | Inflamed | CEBPB     | protein_cc | chr20 | 48807376 | 48809212 | + | 1837 | 2711.088 | 0        | -0.85045 | 0.244687 | -3.47566 | 0.000758 | 0.008164 | 1 |
| ENSG0000 | mucosal h | Inflamed | C5AR1     | protein_cc | chr19 | 47793280 | 47825323 | + | 2951 | 991.5012 | 0        | -1.10465 | 0.317876 | -3.47509 | 0.000759 | 0.008175 | 1 |
| ENSG0000 | mucosal h | Inflamed | DDO       | protein_cc | chr6  | 1.11E+08 | 1.11E+08 | - | 2130 | 60.52029 | 0        | 0.676566 | 0.194695 | 3.475005 | 0.00076  | 0.008175 | 1 |
| ENSG0000 | mucosal h | Inflamed | CYP2J2    | protein_cc | chr1  | 60358980 | 60392462 | - | 2990 | 1116.943 | 0        | 0.878446 | 0.252851 | 3.474162 | 0.000762 | 0.008195 | 1 |
| ENSG0000 | mucosal h | Inflamed | TRPM5     | protein_cc | chr11 | 2425745  | 2444275  | - | 3962 | 170.463  | 0.01432  | 1.131493 | 0.325699 | 3.474041 | 0.000762 | 0.008195 | 1 |
| ENSG0000 | mucosal h | Inflamed | PDGFRB    | protein_cc | chr5  | 1.49E+08 | 1.5E+08  | - | 7137 | 5203.661 | 0        | -0.95652 | 0.275414 | -3.47305 | 0.000765 | 0.008217 | 1 |
| ENSG0000 | mucosal h | Inflamed | RETSAT    | protein_cc | chr2  | 85569211 | 85581743 | - | 4264 | 9232.317 | 0        | 0.638457 | 0.183837 | 3.472961 | 0.000765 | 0.008217 | 1 |
| ENSG0000 | mucosal h | Inflamed | OR7E38P   | pseudoger  | chr7  | 97595402 | 97596386 | - | 985  | 128.3819 | 0        | -0.39453 | 0.113614 | -3.47254 | 0.000766 | 0.008225 | 1 |
| ENSG0000 | mucosal h | Inflamed | RP11-503E | antisense  | chr8  | 42392672 | 42393447 | - | 708  | 22.03341 | 0.093079 | 1.057335 | 0.304545 | 3.471848 | 0.000768 | 0.008241 | 1 |
| ENSG0000 | mucosal h | Inflamed | RP11-392E | pseudoger  | chr9  | 38543101 | 38543443 | - | 343  | 14.70644 | 0.102625 | 0.888135 | 0.255818 | 3.471746 | 0.000768 | 0.008241 | 1 |
| ENSG0000 | mucosal h | Inflamed | RP11-970  | sense_intr | chr15 | 89045175 | 89049018 | - | 3844 | 57.96181 | 0.040573 | 1.123876 | 0.323818 | 3.470706 | 0.000771 | 0.008266 | 1 |
| ENSG0000 | mucosal h | Inflamed | RP11-462C | sense_ove  | chr16 | 3997610  | 4000445  | - | 1394 | 6.446301 | 0.102625 | 0.586605 | 0.169023 | 3.470557 | 0.000771 | 0.008266 | 1 |
| ENSG0000 | mucosal h | Inflamed | GPR153    | protein_cc | chr1  | 6307406  | 6321035  | - | 4082 | 3083.709 | 0        | 0.627196 | 0.180741 | 3.470141 | 0.000772 | 0.008273 | 1 |
| ENSG0000 | mucosal h | Inflamed | C11orf24  | protein_cc | chr11 | 68028803 | 68039469 | - | 3406 | 3195.778 | 0        | -0.23066 | 0.066471 | -3.47008 | 0.000772 | 0.008273 | 1 |
| ENSG0000 | mucosal h | Inflamed | ALAD      | protein_cc | chr9  | 1.16E+08 | 1.16E+08 | - | 5170 | 2522.73  | 0        | 0.369894 | 0.106608 | 3.469673 | 0.000773 | 0.008279 | 1 |
| ENSG0000 | mucosal h | Inflamed | STARD8    | protein_cc | chrX  | 67867508 | 67945684 | + | 5558 | 527.6205 | 0        | -0.74293 | 0.214127 | -3.46959 | 0.000773 | 0.008279 | 1 |
| ENSG0000 | mucosal h | Inflamed | AC002511  | lincRNA    | chr19 | 35914964 | 35915554 | - | 450  | 41.28878 | 0.009547 | 0.928843 | 0.267733 | 3.469292 | 0.000774 | 0.008282 | 1 |
| ENSG0000 | mucosal h | Inflamed | DNASE2B   | protein_cc | chr1  | 84864215 | 84880701 | + | 1476 | 9.720764 | 0.088305 | 0.751783 | 0.216698 | 3.469262 | 0.000774 | 0.008282 | 1 |
| ENSG0000 | mucosal h | Inflamed | BTBD9     | protein_cc | chr6  | 38136227 | 38607924 | - | 9451 | 1551.337 | 0        | 0.450399 | 0.129844 | 3.468768 | 0.000776 | 0.008291 | 1 |
| ENSG0000 | mucosal h | Inflamed | TPH1      | protein_cc | chr11 | 18039111 | 18063973 | - | 5626 | 342.8353 | 0.002387 | 1.412576 | 0.407238 | 3.468676 | 0.000776 | 0.008291 | 1 |

|          |           |          |           |            |       |          |          |   |       |          |          |          |          |          |          |          |   |
|----------|-----------|----------|-----------|------------|-------|----------|----------|---|-------|----------|----------|----------|----------|----------|----------|----------|---|
| ENSG0000 | mucosal h | Inflamed | PSPN      | protein_cc | chr19 | 6375159  | 6379069  | - | 3911  | 181.4439 | 0        | 0.375312 | 0.108207 | 3.468454 | 0.000776 | 0.008294 | 1 |
| ENSG0000 | mucosal h | Inflamed | SEPHS2    | protein_cc | chr16 | 30454952 | 30457502 | - | 2551  | 4207.959 | 0        | 0.427941 | 0.123418 | 3.467419 | 0.000779 | 0.008319 | 1 |
| ENSG0000 | mucosal h | Inflamed | GJD4      | protein_cc | chr10 | 35894338 | 35897863 | + | 1580  | 1.031026 | 0.742243 | 0.387633 | 0.111815 | 3.466724 | 0.000781 | 0.008335 | 1 |
| ENSG0000 | mucosal h | Inflamed | 04-Mar    | protein_cc | chr2  | 2.17E+08 | 2.17E+08 | - | 4447  | 25.15274 | 0.038186 | 1.009531 | 0.291238 | 3.466345 | 0.000782 | 0.008342 | 1 |
| ENSG0000 | mucosal h | Inflamed | MMEL1     | protein_cc | chr1  | 2522078  | 2564481  | - | 3896  | 131.8305 | 0        | 0.585639 | 0.168965 | 3.466027 | 0.000783 | 0.008347 | 1 |
| ENSG0000 | mucosal h | Inflamed | CNNM4     | protein_cc | chr2  | 97426639 | 97477628 | + | 5198  | 9152.072 | 0        | 0.727523 | 0.209946 | 3.465284 | 0.000785 | 0.008364 | 1 |
| ENSG0000 | mucosal h | Inflamed | GLCCI1    | protein_cc | chr7  | 8008425  | 8133902  | + | 6885  | 1112.389 | 0        | -0.89529 | 0.258381 | -3.46498 | 0.000785 | 0.008369 | 1 |
| ENSG0000 | mucosal h | Inflamed | TTC6      | protein_cc | chr14 | 38065052 | 38510647 | + | 8418  | 26.46778 | 0.040573 | 0.847425 | 0.244589 | 3.464694 | 0.000786 | 0.008373 | 1 |
| ENSG0000 | mucosal h | Inflamed | GTSF1     | protein_cc | chr12 | 54849734 | 54867386 | - | 2524  | 21.24582 | 0.01432  | -0.74808 | 0.215926 | -3.4645  | 0.000787 | 0.008373 | 1 |
| ENSG0000 | mucosal h | Inflamed | SIGLEC5   | protein_cc | chr19 | 52114781 | 52150151 | - | 3319  | 41.52983 | 0.038186 | -1.2148  | 0.350646 | -3.46448 | 0.000787 | 0.008373 | 1 |
| ENSG0000 | mucosal h | Inflamed | DCST2     | protein_cc | chr1  | 1.55E+08 | 1.55E+08 | - | 3071  | 53.87589 | 0.004773 | 0.828376 | 0.239146 | 3.463892 | 0.000788 | 0.008386 | 1 |
| ENSG0000 | mucosal h | Inflamed | MILR1     | protein_cc | chr17 | 62461569 | 62464760 | + | 920   | 72.11933 | 0        | -0.63317 | 0.182804 | -3.46364 | 0.000789 | 0.00839  | 1 |
| ENSG0000 | mucosal h | Inflamed | CPT1C     | protein_cc | chr19 | 50194155 | 50216988 | + | 5864  | 96.06444 | 0.002387 | -0.90383 | 0.260972 | -3.46334 | 0.00079  | 0.008394 | 1 |
| ENSG0000 | mucosal h | Inflamed | RALGPS1   | protein_cc | chr9  | 1.3E+08  | 1.3E+08  | + | 10507 | 1377.26  | 0        | 0.594805 | 0.171775 | 3.462702 | 0.000791 | 0.008406 | 1 |
| ENSG0000 | mucosal h | Inflamed | PPARG     | protein_cc | chr3  | 12328867 | 12475855 | + | 4046  | 1882.053 | 0        | 0.691504 | 0.199701 | 3.462688 | 0.000791 | 0.008406 | 1 |
| ENSG0000 | mucosal h | Inflamed | FAM161B   | protein_cc | chr14 | 74398204 | 74417117 | - | 5056  | 218.8926 | 0        | 0.575166 | 0.166115 | 3.462452 | 0.000792 | 0.008409 | 1 |
| ENSG0000 | mucosal h | Inflamed | HUNK      | protein_cc | chr21 | 33245628 | 33416946 | + | 8294  | 562.5394 | 0        | 0.714194 | 0.206322 | 3.461556 | 0.000794 | 0.008431 | 1 |
| ENSG0000 | mucosal h | Inflamed | EPN3      | protein_cc | chr17 | 48609904 | 48621111 | + | 4642  | 1389.728 | 0.004773 | 1.05514  | 0.30483  | 3.461401 | 0.000795 | 0.008432 | 1 |
| ENSG0000 | mucosal h | Inflamed | BRPF3     | protein_cc | chr6  | 36164521 | 36200567 | + | 6618  | 4837.955 | 0        | 0.461117 | 0.13323  | 3.461066 | 0.000796 | 0.008437 | 1 |
| ENSG0000 | mucosal h | Inflamed | FGF9      | protein_cc | chr13 | 22245522 | 22278637 | + | 4539  | 62.41766 | 0.019093 | 1.089982 | 0.314975 | 3.460537 | 0.000797 | 0.008449 | 1 |
| ENSG0000 | mucosal h | Inflamed | ADPRH     | protein_cc | chr3  | 1.19E+08 | 1.19E+08 | + | 4615  | 482.9594 | 0        | -0.64064 | 0.185143 | -3.46025 | 0.000798 | 0.008453 | 1 |
| ENSG0000 | mucosal h | Inflamed | C17orf107 | protein_cc | chr17 | 4802713  | 4806227  | + | 3408  | 181.6539 | 0        | -0.61872 | 0.178815 | -3.46013 | 0.000798 | 0.008453 | 1 |
| ENSG0000 | mucosal h | Inflamed | EMILIN2   | protein_cc | chr18 | 2847028  | 2915991  | + | 6435  | 1562.117 | 0        | -0.66323 | 0.19171  | -3.45955 | 0.0008   | 0.008466 | 1 |
| ENSG0000 | mucosal h | Inflamed | IL17RB    | protein_cc | chr3  | 53880607 | 53899827 | + | 3038  | 483.494  | 0        | 0.80018  | 0.231306 | 3.459404 | 0.0008   | 0.008467 | 1 |
| ENSG0000 | mucosal h | Inflamed | TAPBP     | protein_cc | chr6  | 33267471 | 33282164 | - | 5056  | 15218.88 | 0        | -0.39287 | 0.113578 | -3.45903 | 0.000801 | 0.008471 | 1 |
| ENSG0000 | mucosal h | Inflamed | P2RX5     | protein_cc | chr17 | 3575493  | 3599698  | - | 4190  | 344.4821 | 0        | -1.04722 | 0.302751 | -3.45903 | 0.000801 | 0.008471 | 1 |
| ENSG0000 | mucosal h | Inflamed | INSR      | protein_cc | chr19 | 7112266  | 7294045  | - | 10451 | 3959.129 | 0        | 0.475448 | 0.137477 | 3.458388 | 0.000803 | 0.00848  | 1 |
| ENSG0000 | mucosal h | Inflamed | CTC-459F4 | lincRNA    | chr19 | 28284371 | 28409771 | + | 5141  | 173.7542 | 0        | 0.339407 | 0.098141 | 3.458367 | 0.000803 | 0.00848  | 1 |
| ENSG0000 | mucosal h | Inflamed | A1BG-AS1  | antisense  | chr19 | 58859117 | 58866549 | + | 2793  | 162.5585 | 0        | -0.53931 | 0.155945 | -3.45834 | 0.000803 | 0.00848  | 1 |
| ENSG0000 | mucosal h | Inflamed | GEMIN8P4  | pseudoger  | chr1  | 90459152 | 90459880 | - | 729   | 24.97852 | 0.002387 | 0.56733  | 0.164064 | 3.457977 | 0.000804 | 0.008486 | 1 |
| ENSG0000 | mucosal h | Inflamed | CALCRL    | protein_cc | chr2  | 1.88E+08 | 1.88E+08 | - | 6144  | 352.4177 | 0.002387 | -0.90705 | 0.262325 | -3.45775 | 0.000804 | 0.008486 | 1 |
| ENSG0000 | mucosal h | Inflamed | RP11-276f | lincRNA    | chr9  | 89563614 | 89616948 | + | 4387  | 4.250597 | 0.298329 | -0.70158 | 0.202909 | -3.45762 | 0.000805 | 0.008486 | 1 |
| ENSG0000 | mucosal h | Inflamed | MAFB      | protein_cc | chr20 | 39314488 | 39317880 | - | 3393  | 1381.976 | 0        | -0.64191 | 0.185652 | -3.45757 | 0.000805 | 0.008486 | 1 |
| ENSG0000 | mucosal h | Inflamed | RP3-512B1 | antisense  | chr6  | 7540684  | 7541571  | - | 888   | 26.42005 | 0        | 0.546665 | 0.158109 | 3.457514 | 0.000805 | 0.008486 | 1 |
| ENSG0000 | mucosal h | Inflamed | RP11-783k | antisense  | chr11 | 64013436 | 64015689 | + | 597   | 36.7327  | 0        | -0.76585 | 0.221523 | -3.45719 | 0.000806 | 0.008492 | 1 |
| ENSG0000 | mucosal h | Inflamed | NMT2      | protein_cc | chr10 | 15144583 | 15210692 | - | 5058  | 502.8377 | 0        | 0.52035  | 0.150526 | 3.456887 | 0.000807 | 0.008497 | 1 |
| ENSG0000 | mucosal h | Inflamed | SEC61B    | protein_cc | chr9  | 1.02E+08 | 1.02E+08 | + | 1190  | 2348.325 | 0        | -0.4783  | 0.138368 | -3.45672 | 0.000807 | 0.008498 | 1 |
| ENSG0000 | mucosal h | Inflamed | HCFC1-AS1 | antisense  | chrX  | 1.53E+08 | 1.53E+08 | + | 350   | 1.405728 | 0.663484 | -0.56177 | 0.162593 | -3.45508 | 0.000812 | 0.008541 | 1 |
| ENSG0000 | mucosal h | Inflamed | TMED9     | protein_cc | chr5  | 1.77E+08 | 1.77E+08 | + | 2440  | 5756.668 | 0        | -0.28371 | 0.082118 | -3.45491 | 0.000812 | 0.008542 | 1 |
| ENSG0000 | mucosal h | Inflamed | CYYR1     | protein_cc | chr21 | 27838528 | 27945603 | - | 3436  | 435.9212 | 0        | -0.72036 | 0.20853  | -3.45445 | 0.000813 | 0.008552 | 1 |

|          |                     |           |                  |          |          |   |       |          |          |          |          |          |          |          |   |
|----------|---------------------|-----------|------------------|----------|----------|---|-------|----------|----------|----------|----------|----------|----------|----------|---|
| ENSG0000 | mucosal hi Inflamed | UBASH3B   | protein_cc chr11 | 1.23E+08 | 1.23E+08 | + | 9011  | 430.5776 | 0        | -0.58176 | 0.168491 | -3.45279 | 0.000818 | 0.008593 | 1 |
| ENSG0000 | mucosal hi Inflamed | GTF2IRD2  | protein_cc chr7  | 74210483 | 74267847 | - | 7233  | 147.2267 | 0        | 0.538988 | 0.156103 | 3.452765 | 0.000818 | 0.008593 | 1 |
| ENSG0000 | mucosal hi Inflamed | APOBEC3C  | protein_cc chr22 | 39410088 | 39416357 | + | 2818  | 1847.406 | 0        | -0.5106  | 0.14796  | -3.45096 | 0.000823 | 0.00864  | 1 |
| ENSG0000 | mucosal hi Inflamed | GPBP1L1   | protein_cc chr1  | 46092976 | 46153785 | - | 7433  | 5520.988 | 0        | 0.5028   | 0.145703 | 3.450853 | 0.000823 | 0.00864  | 1 |
| ENSG0000 | mucosal hi Inflamed | UGT1A1    | protein_cc chr2  | 2.35E+08 | 2.35E+08 | + | 7982  | 304.0644 | 0.02864  | 1.319259 | 0.382545 | 3.448641 | 0.000829 | 0.0087   | 1 |
| ENSG0000 | mucosal hi Inflamed | CTD-2385I | antisense chr16  | 23723311 | 23724114 | + | 534   | 4.670644 | 0.183771 | 0.578933 | 0.167922 | 3.447639 | 0.000832 | 0.008723 | 1 |
| ENSG0000 | mucosal hi Inflamed | ENKUR     | protein_cc chr10 | 25270908 | 25305089 | - | 3720  | 60.74224 | 0.026253 | -1.42444 | 0.413168 | -3.4476  | 0.000832 | 0.008723 | 1 |
| ENSG0000 | mucosal hi Inflamed | ZNF763    | protein_cc chr19 | 12035890 | 12091196 | + | 3044  | 56.34129 | 0.002387 | 0.751404 | 0.218076 | 3.445615 | 0.000837 | 0.008777 | 1 |
| ENSG0000 | mucosal hi Inflamed | D2HGDH    | protein_cc chr2  | 2.43E+08 | 2.43E+08 | + | 5279  | 1762.778 | 0        | 0.602725 | 0.174967 | 3.444799 | 0.00084  | 0.008797 | 1 |
| ENSG0000 | mucosal hi Inflamed | GALNT2    | protein_cc chr1  | 2.3E+08  | 2.3E+08  | + | 7944  | 6470.134 | 0        | -0.40298 | 0.11699  | -3.44461 | 0.00084  | 0.008798 | 1 |
| ENSG0000 | mucosal hi Inflamed | ERVW-1    | protein_cc chr7  | 92097694 | 92107300 | - | 6130  | 1.637232 | 0.75179  | 0.758961 | 0.220345 | 3.444421 | 0.000841 | 0.008798 | 1 |
| ENSG0000 | mucosal hi Inflamed | AC009495  | lincRNA chr2     | 1.67E+08 | 1.67E+08 | - | 372   | 9.947494 | 0.090692 | 0.676158 | 0.196307 | 3.444389 | 0.000841 | 0.008798 | 1 |
| ENSG0000 | mucosal hi Inflamed | RP11-757F | antisense chr3   | 1.12E+08 | 1.12E+08 | + | 1937  | 106.1122 | 0.016706 | 1.274101 | 0.36994  | 3.444071 | 0.000842 | 0.008804 | 1 |
| ENSG0000 | mucosal hi Inflamed | ARHGAP5-  | antisense chr14  | 32544625 | 32545999 | - | 1375  | 78.61098 | 0        | 0.37124  | 0.107828 | 3.442893 | 0.000845 | 0.008835 | 1 |
| ENSG0000 | mucosal hi Inflamed | MSN       | protein_cc chrX  | 64808257 | 64961791 | + | 5969  | 13315.18 | 0        | -0.72286 | 0.209994 | -3.44229 | 0.000847 | 0.008849 | 1 |
| ENSG0000 | mucosal hi Inflamed | SPTLC3    | protein_cc chr20 | 12989627 | 13147411 | + | 6377  | 182.8783 | 0.004773 | 0.707153 | 0.205442 | 3.442114 | 0.000847 | 0.008851 | 1 |
| ENSG0000 | mucosal hi Inflamed | RP11-464I | sense_intr chr17 | 60627087 | 60629482 | + | 1707  | 1.789976 | 0.556086 | 0.522515 | 0.151816 | 3.441752 | 0.000848 | 0.008858 | 1 |
| ENSG0000 | mucosal hi Inflamed | OCRL      | protein_cc chrX  | 1.29E+08 | 1.29E+08 | + | 5779  | 2025.434 | 0        | 0.503837 | 0.146419 | 3.441072 | 0.00085  | 0.008869 | 1 |
| ENSG0000 | mucosal hi Inflamed | DNMBP     | protein_cc chr10 | 1.02E+08 | 1.02E+08 | - | 8634  | 3311.007 | 0        | 0.615968 | 0.179007 | 3.441021 | 0.00085  | 0.008869 | 1 |
| ENSG0000 | mucosal hi Inflamed | CNGA1     | protein_cc chr4  | 47937994 | 48018689 | - | 3581  | 82.36754 | 0.011933 | 0.97415  | 0.283101 | 3.440994 | 0.00085  | 0.008869 | 1 |
| ENSG0000 | mucosal hi Inflamed | SLC26A9   | protein_cc chr1  | 2.06E+08 | 2.06E+08 | - | 5628  | 19.05251 | 0.374702 | -1.42762 | 0.414905 | -3.44084 | 0.000851 | 0.00887  | 1 |
| ENSG0000 | mucosal hi Inflamed | TM4SF20   | protein_cc chr2  | 2.28E+08 | 2.28E+08 | - | 2757  | 903.5632 | 0.026253 | -1.8154  | 0.527625 | -3.44071 | 0.000851 | 0.008871 | 1 |
| ENSG0000 | mucosal hi Inflamed | RAB40A    | protein_cc chrX  | 1.03E+08 | 1.03E+08 | - | 3398  | 5.150358 | 0.24821  | 0.754419 | 0.219272 | 3.440555 | 0.000851 | 0.008872 | 1 |
| ENSG0000 | mucosal hi Inflamed | ZYX       | protein_cc chr7  | 1.43E+08 | 1.43E+08 | + | 3482  | 7816.227 | 0        | -0.57095 | 0.165964 | -3.44018 | 0.000852 | 0.008877 | 1 |
| ENSG0000 | mucosal hi Inflamed | MCAM      | protein_cc chr11 | 1.19E+08 | 1.19E+08 | - | 7420  | 2872.305 | 0        | -0.86384 | 0.251107 | -3.44013 | 0.000853 | 0.008877 | 1 |
| ENSG0000 | mucosal hi Inflamed | LCMT1     | protein_cc chr16 | 25123050 | 25189552 | + | 2606  | 1120.351 | 0        | 0.284141 | 0.082603 | 3.439861 | 0.000853 | 0.008881 | 1 |
| ENSG0000 | mucosal hi Inflamed | CD86      | protein_cc chr3  | 1.22E+08 | 1.22E+08 | + | 3430  | 438.6563 | 0        | -0.70462 | 0.204852 | -3.43964 | 0.000854 | 0.008881 | 1 |
| ENSG0000 | mucosal hi Inflamed | IGHV3-9   | IG_V_gene chr14  | 1.07E+08 | 1.07E+08 | - | 434   | 9471.599 | 0.045346 | -1.48265 | 0.431072 | -3.43945 | 0.000854 | 0.008881 | 1 |
| ENSG0000 | mucosal hi Inflamed | PRLR      | protein_cc chr5  | 35048861 | 35230794 | - | 13208 | 445.8234 | 0        | 1.094625 | 0.318268 | 3.439316 | 0.000855 | 0.008881 | 1 |
| ENSG0000 | mucosal hi Inflamed | VMO1      | protein_cc chr17 | 4688580  | 4689728  | - | 803   | 83.21718 | 0        | -0.81348 | 0.236523 | -3.43931 | 0.000855 | 0.008881 | 1 |
| ENSG0000 | mucosal hi Inflamed | MFSD12    | protein_cc chr19 | 3538259  | 3574288  | - | 5277  | 2531.442 | 0        | -0.44238 | 0.128626 | -3.43926 | 0.000855 | 0.008881 | 1 |
| ENSG0000 | mucosal hi Inflamed | FADS2     | protein_cc chr11 | 61560452 | 61634826 | + | 11026 | 2340.716 | 0        | -1.16942 | 0.340082 | -3.43864 | 0.000857 | 0.008896 | 1 |
| ENSG0000 | mucosal hi Inflamed | NEUROD1   | protein_cc chr2  | 1.83E+08 | 1.83E+08 | - | 3312  | 55.35561 | 0.073986 | 1.340924 | 0.390066 | 3.437682 | 0.000859 | 0.008921 | 1 |
| ENSG0000 | mucosal hi Inflamed | PLEKHG2   | protein_cc chr19 | 39903225 | 39919054 | + | 9199  | 1810.99  | 0        | -0.70562 | 0.205298 | -3.43707 | 0.000861 | 0.008933 | 1 |
| ENSG0000 | mucosal hi Inflamed | C1QB      | protein_cc chr1  | 22979255 | 22988031 | + | 1601  | 8024.821 | 0        | -0.59484 | 0.173071 | -3.437   | 0.000861 | 0.008933 | 1 |
| ENSG0000 | mucosal hi Inflamed | RRNAD1    | protein_cc chr1  | 1.57E+08 | 1.57E+08 | + | 3169  | 1061.196 | 0        | 0.257898 | 0.07504  | 3.436811 | 0.000862 | 0.008933 | 1 |
| ENSG0000 | mucosal hi Inflamed | PLCE1     | protein_cc chr10 | 95753746 | 96092580 | + | 13282 | 2756.024 | 0        | 0.882573 | 0.256803 | 3.436774 | 0.000862 | 0.008933 | 1 |
| ENSG0000 | mucosal hi Inflamed | AC074289  | antisense chr2   | 64370373 | 64479993 | + | 2453  | 131.0716 | 0        | -1.00237 | 0.29171  | -3.43618 | 0.000864 | 0.008947 | 1 |
| ENSG0000 | mucosal hi Inflamed | TRIB3     | protein_cc chr20 | 361261   | 378203   | + | 2948  | 308.4749 | 0        | -0.56107 | 0.163316 | -3.43546 | 0.000866 | 0.008963 | 1 |
| ENSG0000 | mucosal hi Inflamed | THR-B-AS1 | processed_chr3   | 24535578 | 24541833 | + | 3191  | 3.300716 | 0.379475 | 0.567793 | 0.165277 | 3.435413 | 0.000866 | 0.008963 | 1 |

|          |           |          |           |                  |          |          |   |      |          |          |          |          |          |          |          |   |
|----------|-----------|----------|-----------|------------------|----------|----------|---|------|----------|----------|----------|----------|----------|----------|----------|---|
| ENSG0000 | mucosal h | Inflamed | SLC41A1   | protein_cc chr1  | 2.06E+08 | 2.06E+08 | - | 6357 | 1071.024 | 0        | -0.62667 | 0.18245  | -3.43476 | 0.000868 | 0.008975 | 1 |
| ENSG0000 | mucosal h | Inflamed | SIDT2     | protein_cc chr11 | 1.17E+08 | 1.17E+08 | + | 9061 | 3715.702 | 0        | 0.360343 | 0.104912 | 3.434729 | 0.000868 | 0.008975 | 1 |
| ENSG0000 | mucosal h | Inflamed | PIK3CD    | protein_cc chr1  | 9711790  | 9789172  | + | 6593 | 1925.179 | 0        | -0.8191  | 0.238481 | -3.43463 | 0.000868 | 0.008975 | 1 |
| ENSG0000 | mucosal h | Inflamed | ITGAX     | protein_cc chr16 | 31366455 | 31394318 | + | 6533 | 2691.093 | 0        | -1.11956 | 0.326011 | -3.43413 | 0.00087  | 0.008983 | 1 |
| ENSG0000 | mucosal h | Inflamed | LCP1      | protein_cc chr13 | 46700055 | 46786006 | - | 5216 | 7455.661 | 0        | -0.86285 | 0.251257 | -3.43413 | 0.00087  | 0.008983 | 1 |
| ENSG0000 | mucosal h | Inflamed | RP11-881M | antisense chr11  | 60674261 | 60677214 | + | 810  | 9.069212 | 0.047733 | -0.66749 | 0.194386 | -3.43381 | 0.000871 | 0.008989 | 1 |
| ENSG0000 | mucosal h | Inflamed | HCST      | protein_cc chr19 | 36393382 | 36395279 | + | 613  | 363.1766 | 0        | -0.63592 | 0.185213 | -3.43345 | 0.000872 | 0.008996 | 1 |
| ENSG0000 | mucosal h | Inflamed | FAM215A   | protein_cc chr17 | 41994576 | 41995326 | + | 751  | 1.477327 | 0.596659 | -0.464   | 0.135168 | -3.4328  | 0.000873 | 0.009011 | 1 |
| ENSG0000 | mucosal h | Inflamed | IGHV1-17  | IG_V_pseu chr14  | 1.07E+08 | 1.07E+08 | - | 334  | 10.70883 | 0.116945 | -0.99748 | 0.290581 | -3.43272 | 0.000874 | 0.009011 | 1 |
| ENSG0000 | mucosal h | Inflamed | RP11-799E | lincRNA chr18    | 21739473 | 21742175 | - | 735  | 10.02148 | 0.121718 | 0.776979 | 0.226396 | 3.431945 | 0.000876 | 0.00903  | 1 |
| ENSG0000 | mucosal h | Inflamed | ARHGAP8   | protein_cc chr22 | 45098355 | 45258665 | + | 5678 | 209.611  | 0.004773 | 0.967846 | 0.282097 | 3.430902 | 0.000879 | 0.009058 | 1 |
| ENSG0000 | mucosal h | Inflamed | RP11-1007 | lincRNA chr15    | 72700119 | 72767509 | - | 2713 | 54.05728 | 0.004773 | 0.386751 | 0.112734 | 3.430642 | 0.00088  | 0.009062 | 1 |
| ENSG0000 | mucosal h | Inflamed | ADORA2A   | protein_cc chr22 | 24813847 | 24838328 | + | 4193 | 36.29117 | 0.004773 | -0.69463 | 0.202524 | -3.42985 | 0.000882 | 0.00908  | 1 |
| ENSG0000 | mucosal h | Inflamed | AGFG2     | protein_cc chr7  | 1E+08    | 1E+08    | + | 5478 | 2916.191 | 0        | 0.638411 | 0.186137 | 3.429789 | 0.000882 | 0.00908  | 1 |
| ENSG0000 | mucosal h | Inflamed | C3        | protein_cc chr19 | 6677715  | 6730573  | - | 8328 | 15841.01 | 0        | -1.28102 | 0.373513 | -3.42965 | 0.000883 | 0.009081 | 1 |
| ENSG0000 | mucosal h | Inflamed | TUFT1     | protein_cc chr1  | 1.52E+08 | 1.52E+08 | + | 4017 | 1237.852 | 0        | 0.61594  | 0.179637 | 3.428799 | 0.000885 | 0.009103 | 1 |
| ENSG0000 | mucosal h | Inflamed | OLFM2     | protein_cc chr19 | 9964394  | 10047228 | - | 2500 | 244.1122 | 0        | -0.76212 | 0.222279 | -3.42867 | 0.000885 | 0.009103 | 1 |
| ENSG0000 | mucosal h | Inflamed | RP11-1275 | lincRNA chr7     | 5465401  | 5466032  | + | 632  | 19.78998 | 0.00716  | 0.627367 | 0.183019 | 3.42787  | 0.000888 | 0.009123 | 1 |
| ENSG0000 | mucosal h | Inflamed | OR5G3     | polymorpt chr11  | 56587052 | 56587980 | - | 929  | 1.109785 | 0.74463  | 0.467907 | 0.136512 | 3.427582 | 0.000889 | 0.009129 | 1 |
| ENSG0000 | mucosal h | Inflamed | MYCL      | protein_cc chr1  | 40361098 | 40367928 | - | 5065 | 863.7112 | 0        | 0.50614  | 0.147732 | 3.426075 | 0.000893 | 0.00917  | 1 |
| ENSG0000 | mucosal h | Inflamed | CLYBL     | protein_cc chr13 | 1E+08    | 1.01E+08 | + | 7826 | 451.2578 | 0        | 0.556356 | 0.16241  | 3.425635 | 0.000894 | 0.00918  | 1 |
| ENSG0000 | mucosal h | Inflamed | TRBV29-1  | TR_V_gen chr7    | 1.42E+08 | 1.42E+08 | + | 402  | 35.77327 | 0.00716  | -0.86047 | 0.251228 | -3.42507 | 0.000896 | 0.009192 | 1 |
| ENSG0000 | mucosal h | Inflamed | HES1      | protein_cc chr3  | 1.94E+08 | 1.94E+08 | + | 2062 | 1841.179 | 0        | 0.471085 | 0.137543 | 3.424995 | 0.000896 | 0.009192 | 1 |
| ENSG0000 | mucosal h | Inflamed | PKLR      | protein_cc chr1  | 1.55E+08 | 1.55E+08 | - | 2618 | 32.84726 | 0.157518 | 1.070776 | 0.312653 | 3.424805 | 0.000897 | 0.009194 | 1 |
| ENSG0000 | mucosal h | Inflamed | UBL3      | protein_cc chr13 | 30338508 | 30424821 | - | 4384 | 1747.737 | 0        | 0.577646 | 0.168681 | 3.424484 | 0.000898 | 0.0092   | 1 |
| ENSG0000 | mucosal h | Inflamed | KIR3DX1   | protein_cc chr19 | 55043909 | 55057053 | + | 5199 | 15.97375 | 0.052506 | -0.81866 | 0.23907  | -3.42437 | 0.000898 | 0.0092   | 1 |
| ENSG0000 | mucosal h | Inflamed | CTD-2235  | antisense chr15  | 75192333 | 75193030 | + | 415  | 9.613365 | 0.042959 | 0.489444 | 0.142981 | 3.42314  | 0.000902 | 0.009234 | 1 |
| ENSG0000 | mucosal h | Inflamed | RP11-234E | lincRNA chr12    | 4809583  | 4829268  | - | 1249 | 523.2458 | 0.00716  | 0.969245 | 0.283155 | 3.423021 | 0.000902 | 0.009234 | 1 |
| ENSG0000 | mucosal h | Inflamed | PRSS27    | protein_cc chr16 | 2762419  | 2770552  | - | 5921 | 28.8043  | 0.00716  | -0.61625 | 0.180051 | -3.42267 | 0.000903 | 0.009241 | 1 |
| ENSG0000 | mucosal h | Inflamed | GBP2      | protein_cc chr1  | 89571815 | 89616139 | - | 6276 | 3376.389 | 0        | -0.60679 | 0.177301 | -3.42234 | 0.000904 | 0.009247 | 1 |
| ENSG0000 | mucosal h | Inflamed | DEF6      | protein_cc chr6  | 35265595 | 35289548 | + | 2675 | 1388.272 | 0        | -0.49895 | 0.1458   | -3.42216 | 0.000905 | 0.009249 | 1 |
| ENSG0000 | mucosal h | Inflamed | KIAA0319  | protein_cc chr6  | 24544332 | 24646383 | - | 7005 | 101.7852 | 0.009547 | 0.854425 | 0.249709 | 3.421677 | 0.000906 | 0.009257 | 1 |
| ENSG0000 | mucosal h | Inflamed | ALOX15    | protein_cc chr17 | 4534197  | 4545589  | - | 3404 | 226.1337 | 0.004773 | -1.10152 | 0.321925 | -3.42167 | 0.000906 | 0.009257 | 1 |
| ENSG0000 | mucosal h | Inflamed | SIPA1L2   | protein_cc chr1  | 2.33E+08 | 2.33E+08 | - | 7641 | 2668.325 | 0        | 0.720067 | 0.210481 | 3.421054 | 0.000908 | 0.009272 | 1 |
| ENSG0000 | mucosal h | Inflamed | PRAM1     | protein_cc chr19 | 8554940  | 8567996  | - | 3763 | 132.7613 | 0        | -0.77832 | 0.227523 | -3.42084 | 0.000908 | 0.009275 | 1 |
| ENSG0000 | mucosal h | Inflamed | HCN3      | protein_cc chr1  | 1.55E+08 | 1.55E+08 | + | 4121 | 418.8401 | 0        | 0.658891 | 0.192618 | 3.420718 | 0.000909 | 0.009275 | 1 |
| ENSG0000 | mucosal h | Inflamed | GPD1L     | protein_cc chr3  | 32147181 | 32210205 | + | 4802 | 2890.601 | 0        | 0.788238 | 0.230467 | 3.420179 | 0.00091  | 0.009288 | 1 |
| ENSG0000 | mucosal h | Inflamed | B9D1      | protein_cc chr17 | 19240867 | 19281495 | - | 3522 | 216.6563 | 0        | -0.52853 | 0.15455  | -3.41981 | 0.000912 | 0.009296 | 1 |
| ENSG0000 | mucosal h | Inflamed | RP11-691M | protein_cc chr11 | 57509635 | 57560715 | + | 580  | 22.58473 | 0.102625 | 1.060719 | 0.310273 | 3.418658 | 0.000915 | 0.009327 | 1 |
| ENSG0000 | mucosal h | Inflamed | TRIM21    | protein_cc chr11 | 4406127  | 4414926  | - | 1952 | 1504.303 | 0        | -0.36404 | 0.106531 | -3.41719 | 0.000919 | 0.009369 | 1 |

|          |           |          |           |            |       |          |          |   |       |          |          |          |          |          |          |          |   |
|----------|-----------|----------|-----------|------------|-------|----------|----------|---|-------|----------|----------|----------|----------|----------|----------|----------|---|
| ENSG0000 | mucosal h | Inflamed | DHH       | protein_cc | chr12 | 49483204 | 49488602 | - | 1936  | 19.64916 | 0.045346 | -0.84522 | 0.247358 | -3.41699 | 0.00092  | 0.00937  | 1 |
| ENSG0000 | mucosal h | Inflamed | KAZALD1   | protein_cc | chr10 | 1.03E+08 | 1.03E+08 | + | 3613  | 479.3914 | 0        | 0.522688 | 0.15297  | 3.416924 | 0.00092  | 0.00937  | 1 |
| ENSG0000 | mucosal h | Inflamed | RP11-112J | lincRNA    | chr9  | 35772160 | 35790429 | + | 952   | 30.9642  | 0.019093 | 0.854424 | 0.250072 | 3.416718 | 0.000921 | 0.009372 | 1 |
| ENSG0000 | mucosal h | Inflamed | RP11-380M | pseudoger  | chr18 | 45379604 | 45379828 | - | 225   | 168.2315 | 0        | 0.660985 | 0.193476 | 3.416372 | 0.000922 | 0.009379 | 1 |
| ENSG0000 | mucosal h | Inflamed | MPO       | protein_cc | chr17 | 56347217 | 56358296 | - | 3622  | 8.334129 | 0.069212 | -0.63571 | 0.186151 | -3.41504 | 0.000926 | 0.009417 | 1 |
| ENSG0000 | mucosal h | Inflamed | SAP30L    | protein_cc | chr5  | 1.54E+08 | 1.54E+08 | + | 6755  | 2173.332 | 0        | 0.426711 | 0.124958 | 3.414838 | 0.000927 | 0.009419 | 1 |
| ENSG0000 | mucosal h | Inflamed | LINC00032 | lincRNA    | chr9  | 27245682 | 27282791 | - | 2913  | 5.01432  | 0.245823 | 0.671094 | 0.196553 | 3.414312 | 0.000928 | 0.009432 | 1 |
| ENSG0000 | mucosal h | Inflamed | TPST1     | protein_cc | chr7  | 65670186 | 65885530 | + | 2871  | 262.2888 | 0        | -0.73709 | 0.216019 | -3.41215 | 0.000935 | 0.009496 | 1 |
| ENSG0000 | mucosal h | Inflamed | ZMYND15   | protein_cc | chr17 | 4643319  | 4649411  | + | 3291  | 198.9356 | 0        | -0.52658 | 0.154347 | -3.41167 | 0.000936 | 0.009507 | 1 |
| ENSG0000 | mucosal h | Inflamed | CTC-241F2 | antisense  | chr19 | 48758932 | 48761456 | + | 1969  | 170.5084 | 0        | -0.59721 | 0.175059 | -3.41147 | 0.000937 | 0.009509 | 1 |
| ENSG0000 | mucosal h | Inflamed | RP3-405J1 | pseudoger  | chr12 | 50611445 | 50612126 | - | 354   | 2.155131 | 0.486874 | 0.518465 | 0.152001 | 3.410926 | 0.000939 | 0.009521 | 1 |
| ENSG0000 | mucosal h | Inflamed | AC005786  | antisense  | chr19 | 3544197  | 3557567  | + | 565   | 29.46778 | 0.033413 | 0.816163 | 0.239284 | 3.410849 | 0.000939 | 0.009521 | 1 |
| ENSG0000 | mucosal h | Inflamed | IRF7      | protein_cc | chr11 | 612553   | 615999   | - | 2628  | 1850.167 | 0        | -0.49836 | 0.146123 | -3.41055 | 0.00094  | 0.009527 | 1 |
| ENSG0000 | mucosal h | Inflamed | HS3ST1    | protein_cc | chr4  | 11394774 | 11431389 | - | 8166  | 534.1313 | 0        | -0.47806 | 0.140184 | -3.41019 | 0.000941 | 0.009535 | 1 |
| ENSG0000 | mucosal h | Inflamed | AC006129  | lincRNA    | chr19 | 42041545 | 42043266 | + | 1722  | 62.86158 | 0.002387 | -0.91076 | 0.267103 | -3.40979 | 0.000942 | 0.009544 | 1 |
| ENSG0000 | mucosal h | Inflamed | MYO10     | protein_cc | chr5  | 16665395 | 16936372 | - | 10537 | 4571.131 | 0        | 0.49836  | 0.146195 | 3.408883 | 0.000945 | 0.009568 | 1 |
| ENSG0000 | mucosal h | Inflamed | SERPINA1  | protein_cc | chr14 | 94843084 | 94857030 | - | 4902  | 23503.42 | 0        | -0.58178 | 0.1707   | -3.4082  | 0.000947 | 0.009586 | 1 |
| ENSG0000 | mucosal h | Inflamed | GLB1L2    | protein_cc | chr11 | 1.34E+08 | 1.34E+08 | + | 7280  | 1628.613 | 0        | 0.64269  | 0.188585 | 3.407959 | 0.000948 | 0.00959  | 1 |
| ENSG0000 | mucosal h | Inflamed | MYLIP     | protein_cc | chr6  | 16129356 | 16148479 | + | 3033  | 1211.89  | 0        | 0.477841 | 0.140218 | 3.407849 | 0.000948 | 0.00959  | 1 |
| ENSG0000 | mucosal h | Inflamed | SLC10A1   | protein_cc | chr14 | 70242134 | 70264006 | - | 2049  | 2.863962 | 0.486874 | 0.508588 | 0.149256 | 3.407491 | 0.000949 | 0.009594 | 1 |
| ENSG0000 | mucosal h | Inflamed | ADAMTS5   | protein_cc | chr21 | 28290231 | 28338832 | - | 9056  | 227.4988 | 0.002387 | -0.83796 | 0.245918 | -3.40749 | 0.000949 | 0.009594 | 1 |
| ENSG0000 | mucosal h | Inflamed | C1orf186  | protein_cc | chr1  | 2.06E+08 | 2.06E+08 | - | 2910  | 163.4845 | 0        | -0.71192 | 0.20894  | -3.4073  | 0.00095  | 0.009596 | 1 |
| ENSG0000 | mucosal h | Inflamed | RP11-16K1 | antisense  | chr15 | 79271231 | 79278268 | + | 1900  | 4.930788 | 0.310263 | -0.73368 | 0.215362 | -3.40675 | 0.000951 | 0.009609 | 1 |
| ENSG0000 | mucosal h | Inflamed | DAGLA     | protein_cc | chr11 | 61447905 | 61514473 | + | 5757  | 1147     | 0        | 0.593663 | 0.174312 | 3.40575  | 0.000955 | 0.009637 | 1 |
| ENSG0000 | mucosal h | Inflamed | CXCL10    | protein_cc | chr4  | 76942273 | 76944650 | - | 1173  | 535.4678 | 0        | -1.44615 | 0.424764 | -3.40458 | 0.000958 | 0.009669 | 1 |
| ENSG0000 | mucosal h | Inflamed | PDZD3     | protein_cc | chr11 | 1.19E+08 | 1.19E+08 | + | 3827  | 1506.134 | 0.004773 | 1.208994 | 0.355115 | 3.404511 | 0.000958 | 0.009669 | 1 |
| ENSG0000 | mucosal h | Inflamed | PRR5L     | protein_cc | chr11 | 36317838 | 36486754 | + | 6636  | 3182.785 | 0        | 0.664462 | 0.195179 | 3.404371 | 0.000959 | 0.00967  | 1 |
| ENSG0000 | mucosal h | Inflamed | PPCDC     | protein_cc | chr15 | 75315896 | 75409803 | + | 3781  | 485.611  | 0        | -0.34436 | 0.101155 | -3.40425 | 0.000959 | 0.00967  | 1 |
| ENSG0000 | mucosal h | Inflamed | CCL18     | protein_cc | chr17 | 34391640 | 34399392 | + | 1397  | 1300.592 | 0        | -1.49512 | 0.439244 | -3.40385 | 0.000961 | 0.009679 | 1 |
| ENSG0000 | mucosal h | Inflamed | RNF213    | protein_cc | chr17 | 78234665 | 78372586 | + | 28570 | 18573.21 | 0        | -0.61663 | 0.181218 | -3.40271 | 0.000964 | 0.009711 | 1 |
| ENSG0000 | mucosal h | Inflamed | BMP8B     | protein_cc | chr1  | 40222854 | 40254533 | - | 5143  | 735.1408 | 0        | 0.527936 | 0.155193 | 3.401796 | 0.000967 | 0.009736 | 1 |
| ENSG0000 | mucosal h | Inflamed | NOTCH4    | protein_cc | chr6  | 32162620 | 32191844 | - | 9748  | 927.6301 | 0        | -0.78349 | 0.230322 | -3.4017  | 0.000967 | 0.009736 | 1 |
| ENSG0000 | mucosal h | Inflamed | RP5-1028k | lincRNA    | chr17 | 38673278 | 38683254 | + | 1198  | 46.22673 | 0.064439 | -1.2131  | 0.356685 | -3.40103 | 0.000969 | 0.009753 | 1 |
| ENSG0000 | mucosal h | Inflamed | SOX6      | protein_cc | chr11 | 15987995 | 16761138 | - | 19632 | 233.4678 | 0.002387 | 0.873153 | 0.256754 | 3.400743 | 0.00097  | 0.009759 | 1 |
| ENSG0000 | mucosal h | Inflamed | IGSF6     | protein_cc | chr16 | 21652609 | 21663981 | - | 1781  | 415.3508 | 0        | -0.872   | 0.256429 | -3.40054 | 0.000971 | 0.009762 | 1 |
| ENSG0000 | mucosal h | Inflamed | LRRC4     | protein_cc | chr7  | 1.28E+08 | 1.28E+08 | - | 4036  | 98.13842 | 0.002387 | -1.05442 | 0.310119 | -3.40005 | 0.000973 | 0.00977  | 1 |
| ENSG0000 | mucosal h | Inflamed | RP11-104E | antisense  | chr14 | 25064929 | 25126980 | + | 947   | 2.897375 | 0.713604 | -0.78308 | 0.230314 | -3.40004 | 0.000973 | 0.00977  | 1 |
| ENSG0000 | mucosal h | Inflamed | IGF2BP3   | protein_cc | chr7  | 23349828 | 23510086 | - | 8511  | 71.11217 | 0.050119 | -1.1276  | 0.331681 | -3.39966 | 0.000974 | 0.009779 | 1 |
| ENSG0000 | mucosal h | Inflamed | CTA-929Cf | lincRNA    | chr22 | 27706612 | 27713417 | + | 5052  | 3.202864 | 0.494033 | 0.60653  | 0.178432 | 3.399222 | 0.000975 | 0.009789 | 1 |
| ENSG0000 | mucosal h | Inflamed | SLC19A3   | protein_cc | chr2  | 2.29E+08 | 2.29E+08 | - | 5329  | 235.0143 | 0        | 0.740931 | 0.217977 | 3.399116 | 0.000976 | 0.009789 | 1 |

|          |           |          |           |            |       |          |          |   |       |          |          |          |          |          |          |          |   |
|----------|-----------|----------|-----------|------------|-------|----------|----------|---|-------|----------|----------|----------|----------|----------|----------|----------|---|
| ENSG0000 | mucosal h | Inflamed | ATP8B2    | protein_cc | chr1  | 1.54E+08 | 1.54E+08 | + | 7572  | 2209.274 | 0        | -0.71336 | 0.209877 | -3.39896 | 0.000976 | 0.00979  | 1 |
| ENSG0000 | mucosal h | Inflamed | PM20D1    | protein_cc | chr1  | 2.06E+08 | 2.06E+08 | - | 2614  | 18.1599  | 0.150358 | -0.74298 | 0.218654 | -3.39798 | 0.000979 | 0.009817 | 1 |
| ENSG0000 | mucosal h | Inflamed | MT-RNR2   | Mt_rRNA    | chrM  | 1671     | 3229     | + | 1559  | 1122924  | 0        | 0.715317 | 0.210519 | 3.397876 | 0.000979 | 0.009817 | 1 |
| ENSG0000 | mucosal h | Inflamed | IL11      | protein_cc | chr19 | 55875757 | 55881831 | - | 2671  | 880.7542 | 0.002387 | -2.11239 | 0.621899 | -3.39668 | 0.000983 | 0.009852 | 1 |
| ENSG0000 | mucosal h | Inflamed | RP11-108L | lincRNA    | chr10 | 1.03E+08 | 1.03E+08 | - | 977   | 43.09785 | 0        | 0.686831 | 0.202231 | 3.396261 | 0.000985 | 0.009862 | 1 |
| ENSG0000 | mucosal h | Inflamed | LINC00365 | lincRNA    | chr13 | 30677315 | 30683012 | - | 2998  | 12.30788 | 0.090692 | 0.842003 | 0.247949 | 3.395874 | 0.000986 | 0.009869 | 1 |
| ENSG0000 | mucosal h | Inflamed | RTN2      | protein_cc | chr19 | 45988547 | 46000319 | - | 3238  | 294.3031 | 0        | -0.50436 | 0.148525 | -3.39579 | 0.000986 | 0.009869 | 1 |
| ENSG0000 | mucosal h | Inflamed | PDE3A     | protein_cc | chr12 | 20522179 | 20837315 | + | 8398  | 1268.31  | 0        | 0.853722 | 0.251432 | 3.395439 | 0.000987 | 0.009877 | 1 |
| ENSG0000 | mucosal h | Inflamed | KIR2DL3   | protein_cc | chr19 | 55249980 | 55295776 | + | 2484  | 2.424821 | 0.51074  | -0.56633 | 0.166798 | -3.3953  | 0.000988 | 0.009877 | 1 |
| ENSG0000 | mucosal h | Inflamed | RP11-576I | antisense  | chr1  | 1.7E+08  | 1.71E+08 | - | 3185  | 15.84487 | 0.009547 | 0.708399 | 0.208647 | 3.395208 | 0.000988 | 0.009877 | 1 |
| ENSG0000 | mucosal h | Inflamed | CHRNA7    | protein_cc | chr15 | 32322691 | 32464722 | + | 5766  | 75.75179 | 0.01432  | 0.929056 | 0.273649 | 3.395062 | 0.000989 | 0.009878 | 1 |
| ENSG0000 | mucosal h | Inflamed | TAS2R12   | pseudoger  | chr12 | 11047542 | 11048481 | - | 940   | 0.909308 | 0.756563 | 0.406042 | 0.119612 | 3.394668 | 0.00099  | 0.009887 | 1 |
| ENSG0000 | mucosal h | Inflamed | PARD3B    | protein_cc | chr2  | 2.05E+08 | 2.06E+08 | + | 10382 | 613.3723 | 0.002387 | 0.794226 | 0.234079 | 3.392979 | 0.000995 | 0.009937 | 1 |
| ENSG0000 | mucosal h | Inflamed | ANKRD53   | protein_cc | chr2  | 71205510 | 71212626 | + | 2523  | 31.61098 | 0.009547 | -0.74649 | 0.220016 | -3.39288 | 0.000996 | 0.009937 | 1 |
| ENSG0000 | mucosal h | Inflamed | AC003090  | lincRNA    | chr7  | 25632971 | 25790614 | - | 2968  | 17.61337 | 0.050119 | 0.835156 | 0.246162 | 3.392707 | 0.000996 | 0.009939 | 1 |
| ENSG0000 | mucosal h | Inflamed | GRM8      | protein_cc | chr7  | 1.26E+08 | 1.27E+08 | - | 6439  | 87.65632 | 0.00716  | 0.8909   | 0.262605 | 3.392548 | 0.000997 | 0.00994  | 1 |
| ENSG0000 | mucosal h | Inflamed | SULT1A1   | protein_cc | chr16 | 28616903 | 28634946 | - | 8523  | 1966.611 | 0        | 0.700679 | 0.206566 | 3.392032 | 0.000998 | 0.009953 | 1 |
| ENSG0000 | mucosal h | Inflamed | TPRG1     | protein_cc | chr3  | 1.89E+08 | 1.89E+08 | + | 9535  | 38.79475 | 0.002387 | -0.79683 | 0.234992 | -3.3909  | 0.001002 | 0.009977 | 1 |
| ENSG0000 | mucosal h | Inflamed | C19orf66  | protein_cc | chr19 | 10196798 | 10203928 | + | 4341  | 1549.747 | 0        | -0.3689  | 0.108792 | -3.39089 | 0.001002 | 0.009977 | 1 |
| ENSG0000 | mucosal h | Inflamed | LYSMD1    | protein_cc | chr1  | 1.51E+08 | 1.51E+08 | - | 2508  | 257.5823 | 0        | 0.290619 | 0.085706 | 3.390872 | 0.001002 | 0.009977 | 1 |
| ENSG0000 | mucosal h | Inflamed | UBE2S     | protein_cc | chr19 | 55912652 | 55919145 | - | 1249  | 914.1838 | 0        | -0.44159 | 0.130232 | -3.39084 | 0.001002 | 0.009977 | 1 |
| ENSG0000 | mucosal h | Inflamed | CLCN2     | protein_cc | chr3  | 1.84E+08 | 1.84E+08 | - | 4290  | 2626.348 | 0        | 0.905717 | 0.267132 | 3.390525 | 0.001003 | 0.009983 | 1 |
| ENSG0000 | mucosal h | Inflamed | PXDNL     | protein_cc | chr8  | 52232138 | 52722005 | - | 5238  | 11.37232 | 0.073986 | -0.84524 | 0.249365 | -3.38956 | 0.001006 | 0.010011 | 1 |
| ENSG0000 | mucosal h | Inflamed | TMEM206   | protein_cc | chr1  | 2.13E+08 | 2.13E+08 | - | 2914  | 159.3604 | 0        | -0.47194 | 0.139243 | -3.38934 | 0.001007 | 0.010015 | 1 |
| ENSG0000 | mucosal h | Inflamed | RP11-557I | lincRNA    | chr6  | 1.35E+08 | 1.35E+08 | - | 1404  | 6.51074  | 0.159905 | -0.65495 | 0.193261 | -3.38893 | 0.001009 | 0.010024 | 1 |
| ENSG0000 | mucosal h | Inflamed | RP11-219C | lincRNA    | chr17 | 76257430 | 76274573 | - | 2934  | 15.99045 | 0.140811 | -1.04943 | 0.309735 | -3.38816 | 0.001011 | 0.010042 | 1 |
| ENSG0000 | mucosal h | Inflamed | FAM214B   | protein_cc | chr9  | 35104109 | 35116338 | - | 6409  | 2644.573 | 0        | -0.40893 | 0.120694 | -3.38815 | 0.001011 | 0.010042 | 1 |
| ENSG0000 | mucosal h | Inflamed | ZNF497    | protein_cc | chr19 | 58865723 | 58874214 | - | 3897  | 52.69928 | 0.004773 | 0.520986 | 0.153795 | 3.387539 | 0.001013 | 0.010058 | 1 |
| ENSG0000 | mucosal h | Inflamed | FOXO4     | protein_cc | chrX  | 70316047 | 70323385 | + | 3447  | 1602.907 | 0        | 0.426024 | 0.125771 | 3.387293 | 0.001014 | 0.010063 | 1 |
| ENSG0000 | mucosal h | Inflamed | APLP1     | protein_cc | chr19 | 36358801 | 36370693 | + | 3656  | 90.46062 | 0.004773 | -0.80103 | 0.236525 | -3.38668 | 0.001016 | 0.010079 | 1 |
| ENSG0000 | mucosal h | Inflamed | GPR68     | protein_cc | chr14 | 91698876 | 91720269 | - | 3278  | 506.1169 | 0        | -0.7265  | 0.214538 | -3.38632 | 0.001017 | 0.010087 | 1 |
| ENSG0000 | mucosal h | Inflamed | KRTAP5-9  | protein_cc | chr11 | 71259466 | 71260653 | + | 1188  | 6.272076 | 0.159905 | 0.7063   | 0.208627 | 3.38547  | 0.00102  | 0.010108 | 1 |
| ENSG0000 | mucosal h | Inflamed | RP11-379E | pseudoger  | chr3  | 1.26E+08 | 1.26E+08 | - | 205   | 0.904535 | 0.75895  | 0.376559 | 0.111231 | 3.385386 | 0.00102  | 0.010108 | 1 |
| ENSG0000 | mucosal h | Inflamed | RP11-57A1 | lincRNA    | chr16 | 28296206 | 28303385 | - | 2481  | 5.365155 | 0.200477 | 0.666735 | 0.196948 | 3.385328 | 0.00102  | 0.010108 | 1 |
| ENSG0000 | mucosal h | Inflamed | ZNF862    | protein_cc | chr7  | 1.5E+08  | 1.5E+08  | + | 8430  | 949.6158 | 0        | 0.603772 | 0.178354 | 3.385237 | 0.001021 | 0.010108 | 1 |
| ENSG0000 | mucosal h | Inflamed | ADRA1B    | protein_cc | chr5  | 1.59E+08 | 1.59E+08 | + | 1738  | 14.68258 | 0.054893 | 0.843869 | 0.249357 | 3.384176 | 0.001024 | 0.010139 | 1 |
| ENSG0000 | mucosal h | Inflamed | TNFRSF12I | protein_cc | chr16 | 3068446  | 3072384  | + | 1848  | 781.0406 | 0        | -0.88609 | 0.261875 | -3.38363 | 0.001026 | 0.010153 | 1 |
| ENSG0000 | mucosal h | Inflamed | GFOD2     | protein_cc | chr16 | 67708434 | 67753324 | - | 7397  | 1500.091 | 0        | 0.275915 | 0.081551 | 3.383336 | 0.001027 | 0.010159 | 1 |
| ENSG0000 | mucosal h | Inflamed | LGSN      | protein_cc | chr6  | 63985856 | 64029882 | - | 5634  | 14.31026 | 0.334129 | 1.27211  | 0.376222 | 3.38127  | 0.001034 | 0.010224 | 1 |
| ENSG0000 | mucosal h | Inflamed | LETM1     | protein_cc | chr4  | 1813206  | 1857974  | - | 8184  | 6057.737 | 0        | 0.505523 | 0.149538 | 3.380562 | 0.001036 | 0.010241 | 1 |

|          |           |          |           |            |       |          |          |   |       |          |          |          |          |          |          |          |   |
|----------|-----------|----------|-----------|------------|-------|----------|----------|---|-------|----------|----------|----------|----------|----------|----------|----------|---|
| ENSG0000 | mucosal h | Inflamed | FAM13A    | protein_cc | chr4  | 89647106 | 90032549 | - | 13215 | 1533.408 | 0        | 0.673998 | 0.199377 | 3.380511 | 0.001037 | 0.010241 | 1 |
| ENSG0000 | mucosal h | Inflamed | SCARNA2   | lincRNA    | chr1  | 1.1E+08  | 1.1E+08  | + | 427   | 3.596659 | 0.346062 | 0.644008 | 0.190514 | 3.380375 | 0.001037 | 0.010242 | 1 |
| ENSG0000 | mucosal h | Inflamed | RP11-6771 | antisense  | chr11 | 1.25E+08 | 1.25E+08 | - | 445   | 4.816229 | 0.205251 | 0.671232 | 0.198724 | 3.377715 | 0.001046 | 0.010323 | 1 |
| ENSG0000 | mucosal h | Inflamed | C2orf68   | protein_cc | chr2  | 85833777 | 85839189 | - | 4413  | 1199.313 | 0        | 0.295581 | 0.087511 | 3.377624 | 0.001046 | 0.010323 | 1 |
| ENSG0000 | mucosal h | Inflamed | ANXA10    | protein_cc | chr4  | 1.69E+08 | 1.69E+08 | + | 1812  | 114.7494 | 0.367542 | -2.00481 | 0.593559 | -3.37761 | 0.001046 | 0.010323 | 1 |
| ENSG0000 | mucosal h | Inflamed | KLHL5     | protein_cc | chr4  | 39046659 | 39128477 | + | 5144  | 716.6802 | 0        | -0.8884  | 0.263044 | -3.37738 | 0.001047 | 0.010327 | 1 |
| ENSG0000 | mucosal h | Inflamed | MSANTD1   | protein_cc | chr4  | 3246096  | 3273465  | + | 7553  | 18.38425 | 0.009547 | 0.591859 | 0.175325 | 3.375778 | 0.001053 | 0.010373 | 1 |
| ENSG0000 | mucosal h | Inflamed | C8orf48   | protein_cc | chr8  | 13424352 | 13425796 | + | 1445  | 8.322196 | 0.064439 | -0.62637 | 0.18555  | -3.37575 | 0.001053 | 0.010373 | 1 |
| ENSG0000 | mucosal h | Inflamed | IL34      | protein_cc | chr16 | 70613798 | 70694585 | + | 2233  | 404.1766 | 0        | -0.69917 | 0.207122 | -3.37565 | 0.001053 | 0.010373 | 1 |
| ENSG0000 | mucosal h | Inflamed | RASIP1    | protein_cc | chr19 | 49223844 | 49243978 | - | 4149  | 500.0453 | 0        | -0.8278  | 0.245236 | -3.37554 | 0.001054 | 0.010373 | 1 |
| ENSG0000 | mucosal h | Inflamed | NUDT7     | protein_cc | chr16 | 77756411 | 77776157 | + | 1502  | 163.9236 | 0        | 0.511302 | 0.151492 | 3.375108 | 0.001055 | 0.010384 | 1 |
| ENSG0000 | mucosal h | Inflamed | IGLV2-18  | IG_V_gene  | chr22 | 23077095 | 23077584 | + | 374   | 1372.508 | 0        | -1.24015 | 0.367495 | -3.37459 | 0.001057 | 0.010398 | 1 |
| ENSG0000 | mucosal h | Inflamed | CATSPER2  | protein_cc | chr15 | 43920701 | 43960316 | - | 8403  | 242.5656 | 0.004773 | 1.03732  | 0.307435 | 3.374116 | 0.001058 | 0.01041  | 1 |
| ENSG0000 | mucosal h | Inflamed | RP11-848F | pseudoger  | chr17 | 29335515 | 29420145 | + | 2147  | 69.26014 | 0        | 0.490089 | 0.145278 | 3.373467 | 0.001061 | 0.010428 | 1 |
| ENSG0000 | mucosal h | Inflamed | CDH6      | protein_cc | chr5  | 31193857 | 31329253 | + | 12379 | 107.4964 | 0.009547 | -0.79936 | 0.236962 | -3.37335 | 0.001061 | 0.010428 | 1 |
| ENSG0000 | mucosal h | Inflamed | RP5-864K1 | antisense  | chr1  | 39325672 | 39385068 | + | 976   | 15.6778  | 0        | -0.44074 | 0.130659 | -3.37321 | 0.001062 | 0.010429 | 1 |
| ENSG0000 | mucosal h | Inflamed | STMN3     | protein_cc | chr20 | 62271061 | 62284780 | - | 2449  | 687.6229 | 0        | -0.66837 | 0.198158 | -3.37291 | 0.001063 | 0.010435 | 1 |
| ENSG0000 | mucosal h | Inflamed | AFF2      | protein_cc | chrX  | 1.48E+08 | 1.48E+08 | + | 14006 | 53.05967 | 0.045346 | -1.24985 | 0.370584 | -3.37263 | 0.001064 | 0.010441 | 1 |
| ENSG0000 | mucosal h | Inflamed | LINC00888 | pseudoger  | chr3  | 1.83E+08 | 1.83E+08 | + | 2131  | 93.8926  | 0        | -0.62943 | 0.186652 | -3.37219 | 0.001065 | 0.010452 | 1 |
| ENSG0000 | mucosal h | Inflamed | MLLT4-AS  | processed  | chr6  | 1.68E+08 | 1.68E+08 | - | 2362  | 35.71838 | 0.023866 | 0.94717  | 0.280889 | 3.372048 | 0.001066 | 0.010453 | 1 |
| ENSG0000 | mucosal h | Inflamed | AC011899  | antisense  | chr7  | 1.58E+08 | 1.58E+08 | + | 4662  | 152.2172 | 0.002387 | -0.5461  | 0.16198  | -3.37141 | 0.001068 | 0.010471 | 1 |
| ENSG0000 | mucosal h | Inflamed | CYP7B1    | protein_cc | chr8  | 65500320 | 65711318 | - | 2282  | 96.62053 | 0.016706 | -1.06527 | 0.315984 | -3.37128 | 0.001068 | 0.010471 | 1 |
| ENSG0000 | mucosal h | Inflamed | RP13-726E | processed  | chr11 | 3502750  | 3602441  | - | 1377  | 16.30549 | 0.040573 | 0.806188 | 0.239165 | 3.370841 | 0.00107  | 0.010475 | 1 |
| ENSG0000 | mucosal h | Inflamed | C9orf152  | protein_cc | chr9  | 1.13E+08 | 1.13E+08 | - | 2947  | 2957.513 | 0        | 0.958319 | 0.284309 | 3.370688 | 0.00107  | 0.010475 | 1 |
| ENSG0000 | mucosal h | Inflamed | GPRIN2    | protein_cc | chr10 | 46994087 | 47005643 | + | 7985  | 2383.253 | 0        | 1.107548 | 0.328586 | 3.370643 | 0.00107  | 0.010475 | 1 |
| ENSG0000 | mucosal h | Inflamed | IGKV1D-42 | IG_V_gene  | chr2  | 90229045 | 90229531 | + | 371   | 3.5179   | 0.501193 | -0.75356 | 0.223569 | -3.37061 | 0.001071 | 0.010475 | 1 |
| ENSG0000 | mucosal h | Inflamed | GAPT      | protein_cc | chr5  | 57787262 | 57792917 | + | 3273  | 139.3962 | 0        | -0.8663  | 0.257017 | -3.37058 | 0.001071 | 0.010475 | 1 |
| ENSG0000 | mucosal h | Inflamed | SCARNA18  | snoRNA     | chr18 | 47340731 | 47340813 | + | 83    | 1.980907 | 0.47494  | 0.424641 | 0.126001 | 3.370138 | 0.001072 | 0.010487 | 1 |
| ENSG0000 | mucosal h | Inflamed | PDE8A     | protein_cc | chr15 | 85523671 | 85682376 | + | 7886  | 2409.964 | 0        | 0.606611 | 0.180048 | 3.369172 | 0.001076 | 0.010516 | 1 |
| ENSG0000 | mucosal h | Inflamed | CTB-179K2 | antisense  | chr19 | 45579768 | 45593649 | - | 1002  | 8.174224 | 0.047733 | 0.561035 | 0.166554 | 3.368484 | 0.001078 | 0.010534 | 1 |
| ENSG0000 | mucosal h | Inflamed | EDN3      | protein_cc | chr20 | 57875482 | 57901047 | + | 2675  | 1538.492 | 0.004773 | 1.150813 | 0.34165  | 3.368403 | 0.001078 | 0.010534 | 1 |
| ENSG0000 | mucosal h | Inflamed | GAL3ST1   | protein_cc | chr22 | 30950622 | 30970574 | - | 3019  | 231.8663 | 0        | 0.860674 | 0.255543 | 3.368019 | 0.00108  | 0.010541 | 1 |
| ENSG0000 | mucosal h | Inflamed | VDR       | protein_cc | chr12 | 48235320 | 48336831 | - | 5674  | 7265.01  | 0        | 0.541408 | 0.160752 | 3.367977 | 0.00108  | 0.010541 | 1 |
| ENSG0000 | mucosal h | Inflamed | STAT1     | protein_cc | chr2  | 1.92E+08 | 1.92E+08 | - | 6053  | 7497.487 | 0        | -0.73429 | 0.218032 | -3.3678  | 0.00108  | 0.010543 | 1 |
| ENSG0000 | mucosal h | Inflamed | ABCA12    | protein_cc | chr2  | 2.16E+08 | 2.16E+08 | - | 9416  | 352.5656 | 0.164678 | -1.88646 | 0.560227 | -3.36732 | 0.001082 | 0.010555 | 1 |
| ENSG0000 | mucosal h | Inflamed | EFNA4     | protein_cc | chr1  | 1.55E+08 | 1.55E+08 | + | 1263  | 459.6229 | 0        | 0.346767 | 0.102983 | 3.36724  | 0.001082 | 0.010555 | 1 |
| ENSG0000 | mucosal h | Inflamed | EGFL7     | protein_cc | chr9  | 1.4E+08  | 1.4E+08  | + | 2555  | 804.4893 | 0        | -0.70042 | 0.208082 | -3.36607 | 0.001086 | 0.010586 | 1 |
| ENSG0000 | mucosal h | Inflamed | MIR200A   | miRNA      | chr1  | 1103243  | 1103332  | + | 90    | 22.6969  | 0.054893 | 0.876119 | 0.260282 | 3.366039 | 0.001087 | 0.010586 | 1 |
| ENSG0000 | mucosal h | Inflamed | OPRL1     | protein_cc | chr20 | 62711526 | 62731996 | + | 3549  | 91.56802 | 0.004773 | -0.70155 | 0.208425 | -3.36596 | 0.001087 | 0.010586 | 1 |
| ENSG0000 | mucosal h | Inflamed | SURF4     | protein_cc | chr9  | 1.36E+08 | 1.36E+08 | - | 3229  | 14527.57 | 0        | -0.26429 | 0.07852  | -3.36587 | 0.001087 | 0.010586 | 1 |

|          |           |          |           |            |       |          |          |   |       |          |          |          |          |          |          |          |   |
|----------|-----------|----------|-----------|------------|-------|----------|----------|---|-------|----------|----------|----------|----------|----------|----------|----------|---|
| ENSG0000 | mucosal h | Inflamed | WDR66     | protein_cc | chr12 | 1.22E+08 | 1.22E+08 | + | 16115 | 69.24821 | 0.00716  | -0.75913 | 0.225643 | -3.36428 | 0.001093 | 0.010634 | 1 |
| ENSG0000 | mucosal h | Inflamed | LHX6      | protein_cc | chr9  | 1.25E+08 | 1.25E+08 | - | 5748  | 187.6134 | 0.004773 | -0.89557 | 0.266201 | -3.36426 | 0.001093 | 0.010634 | 1 |
| ENSG0000 | mucosal h | Inflamed | SERPINC1  | protein_cc | chr1  | 1.74E+08 | 1.74E+08 | - | 1763  | 3.634845 | 0.264916 | -0.51709 | 0.153726 | -3.36372 | 0.001095 | 0.010648 | 1 |
| ENSG0000 | mucosal h | Inflamed | CTD-2184I | lincRNA    | chr15 | 52408771 | 52414328 | + | 874   | 1.885442 | 0.572792 | 0.46957  | 0.139631 | 3.362944 | 0.001098 | 0.010671 | 1 |
| ENSG0000 | mucosal h | Inflamed | RP1-224A6 | lincRNA    | chr1  | 22350487 | 22351461 | - | 615   | 1.74463  | 0.534606 | -0.45676 | 0.135868 | -3.36177 | 0.001102 | 0.010708 | 1 |
| ENSG0000 | mucosal h | Inflamed | AC074389  | lincRNA    | chr7  | 1778266  | 1781927  | - | 989   | 23.8043  | 0.002387 | -0.68953 | 0.205117 | -3.36163 | 0.001102 | 0.010709 | 1 |
| ENSG0000 | mucosal h | Inflamed | RP4-800J2 | antisense  | chr20 | 55959216 | 55968118 | - | 1540  | 6.470167 | 0.167064 | -0.71578 | 0.212973 | -3.36089 | 0.001105 | 0.01072  | 1 |
| ENSG0000 | mucosal h | Inflamed | RP11-982M | lincRNA    | chr14 | 1.05E+08 | 1.05E+08 | - | 3816  | 10.46778 | 0.145585 | 0.850744 | 0.253132 | 3.360873 | 0.001105 | 0.01072  | 1 |
| ENSG0000 | mucosal h | Inflamed | MMP14     | protein_cc | chr14 | 23305766 | 23318236 | + | 4464  | 11833.18 | 0        | -0.69093 | 0.205583 | -3.36082 | 0.001105 | 0.01072  | 1 |
| ENSG0000 | mucosal h | Inflamed | NUP210    | protein_cc | chr3  | 13357737 | 13461809 | - | 8180  | 3536.58  | 0        | -0.65813 | 0.195828 | -3.36075 | 0.001105 | 0.01072  | 1 |
| ENSG0000 | mucosal h | Inflamed | RP11-175F | pseudoger  | chr12 | 1.01E+08 | 1.01E+08 | - | 1405  | 53.01193 | 0.02864  | 0.856647 | 0.254898 | 3.360745 | 0.001105 | 0.01072  | 1 |
| ENSG0000 | mucosal h | Inflamed | BCL6B     | protein_cc | chr17 | 6926339  | 6933609  | + | 4373  | 500.2792 | 0        | -0.79944 | 0.237909 | -3.36026 | 0.001107 | 0.010733 | 1 |
| ENSG0000 | mucosal h | Inflamed | PDLIM1    | protein_cc | chr10 | 96997329 | 97050781 | - | 2239  | 13442.46 | 0        | 0.306287 | 0.09116  | 3.359886 | 0.001109 | 0.010742 | 1 |
| ENSG0000 | mucosal h | Inflamed | KBTBD11   | protein_cc | chr8  | 1922044  | 1955102  | + | 6710  | 2381.976 | 0        | 0.667013 | 0.198532 | 3.359734 | 0.001109 | 0.010743 | 1 |
| ENSG0000 | mucosal h | Inflamed | CTD-2186I | pseudoger  | chr5  | 32222038 | 32222453 | + | 416   | 0.74463  | 0.799523 | -0.47131 | 0.140286 | -3.35959 | 0.00111  | 0.010744 | 1 |
| ENSG0000 | mucosal h | Inflamed | RP11-315C | antisense  | chr11 | 1.02E+08 | 1.02E+08 | + | 692   | 7.71599  | 0.109785 | 0.606877 | 0.180654 | 3.359324 | 0.001111 | 0.01075  | 1 |
| ENSG0000 | mucosal h | Inflamed | AP001056  | lincRNA    | chr21 | 45595372 | 45596336 | + | 821   | 41.56802 | 0.016706 | -0.70076 | 0.20864  | -3.35871 | 0.001113 | 0.010763 | 1 |
| ENSG0000 | mucosal h | Inflamed | RP11-568M | lincRNA    | chr2  | 64749321 | 64751227 | - | 1907  | 59.10024 | 0.009547 | -0.61636 | 0.183511 | -3.35871 | 0.001113 | 0.010763 | 1 |
| ENSG0000 | mucosal h | Inflamed | KBTBD11-1 | lincRNA    | chr8  | 1919563  | 1924644  | + | 815   | 46.86874 | 0.011933 | 0.75461  | 0.224697 | 3.358341 | 0.001114 | 0.010769 | 1 |
| ENSG0000 | mucosal h | Inflamed | ERBB2     | protein_cc | chr17 | 37844167 | 37886679 | + | 10321 | 11369.23 | 0        | 0.609069 | 0.181361 | 3.358316 | 0.001114 | 0.010769 | 1 |
| ENSG0000 | mucosal h | Inflamed | NPHS2     | protein_cc | chr1  | 1.8E+08  | 1.8E+08  | - | 1874  | 2.288783 | 0.558473 | 0.481427 | 0.143369 | 3.357961 | 0.001115 | 0.010777 | 1 |
| ENSG0000 | mucosal h | Inflamed | ATP8B1    | protein_cc | chr18 | 55313658 | 55470333 | - | 6652  | 12863.99 | 0        | 0.874798 | 0.260543 | 3.357602 | 0.001117 | 0.010779 | 1 |
| ENSG0000 | mucosal h | Inflamed | CTD-2031f | antisense  | chr5  | 55290995 | 55299477 | + | 2289  | 9.725537 | 0.054893 | 0.64709  | 0.192725 | 3.35759  | 0.001117 | 0.010779 | 1 |
| ENSG0000 | mucosal h | Inflamed | MARCKS    | protein_cc | chr6  | 1.14E+08 | 1.14E+08 | + | 4273  | 10476.78 | 0        | 0.425107 | 0.126611 | 3.357571 | 0.001117 | 0.010779 | 1 |
| ENSG0000 | mucosal h | Inflamed | ZNF385D   | protein_cc | chr3  | 21459915 | 22414812 | - | 7420  | 56.36277 | 0.004773 | -0.95488 | 0.284437 | -3.35709 | 0.001119 | 0.010791 | 1 |
| ENSG0000 | mucosal h | Inflamed | AC005336  | pseudoger  | chr19 | 16021392 | 16022634 | - | 1243  | 48.05967 | 0.207637 | 1.072889 | 0.319598 | 3.356994 | 0.001119 | 0.010791 | 1 |
| ENSG0000 | mucosal h | Inflamed | RP11-690C | lincRNA    | chr17 | 37408897 | 37410550 | - | 1654  | 172.9737 | 0.002387 | 0.581623 | 0.173262 | 3.356891 | 0.001119 | 0.010791 | 1 |
| ENSG0000 | mucosal h | Inflamed | AC005256  | lincRNA    | chr19 | 1748055  | 1748744  | + | 458   | 1.878282 | 0.682578 | -0.6808  | 0.202828 | -3.35654 | 0.001121 | 0.0108   | 1 |
| ENSG0000 | mucosal h | Inflamed | RP11-486A | pseudoger  | chr12 | 93708585 | 93709717 | + | 1133  | 44.18616 | 0.01432  | 0.820999 | 0.244623 | 3.35618  | 0.001122 | 0.010808 | 1 |
| ENSG0000 | mucosal h | Inflamed | CRYBB3    | protein_cc | chr22 | 25595817 | 25603330 | + | 867   | 28.53222 | 0.023866 | 0.776827 | 0.231481 | 3.355903 | 0.001123 | 0.010814 | 1 |
| ENSG0000 | mucosal h | Inflamed | RFADN     | processed  | chr18 | 77806900 | 77853362 | + | 6623  | 27.64916 | 0.023866 | 0.773128 | 0.230396 | 3.355644 | 0.001124 | 0.010818 | 1 |
| ENSG0000 | mucosal h | Inflamed | FCGR1C    | pseudoger  | chr1  | 1.49E+08 | 1.49E+08 | + | 2167  | 13.77566 | 0.140811 | -0.98229 | 0.292735 | -3.35555 | 0.001124 | 0.010818 | 1 |
| ENSG0000 | mucosal h | Inflamed | RP11-439E | processed  | chr1  | 2.47E+08 | 2.47E+08 | + | 3984  | 40.04773 | 0.009547 | 0.825449 | 0.246009 | 3.355359 | 0.001125 | 0.010821 | 1 |
| ENSG0000 | mucosal h | Inflamed | HOXB6     | protein_cc | chr17 | 46671639 | 46682354 | - | 4078  | 2064.193 | 0        | 0.745807 | 0.222286 | 3.355161 | 0.001126 | 0.010821 | 1 |
| ENSG0000 | mucosal h | Inflamed | GRK6P1    | pseudoger  | chr13 | 21893231 | 21895005 | + | 1775  | 1.274463 | 0.642005 | 0.437509 | 0.1304   | 3.355138 | 0.001126 | 0.010821 | 1 |
| ENSG0000 | mucosal h | Inflamed | KIAA1211L | protein_cc | chr2  | 99410309 | 99552722 | - | 4705  | 622.1002 | 0        | 0.460411 | 0.137235 | 3.354905 | 0.001127 | 0.010822 | 1 |
| ENSG0000 | mucosal h | Inflamed | STAP2     | protein_cc | chr19 | 4324040  | 4342783  | - | 2766  | 4181.702 | 0        | 0.719966 | 0.214602 | 3.354892 | 0.001127 | 0.010822 | 1 |
| ENSG0000 | mucosal h | Inflamed | BTN1A1    | protein_cc | chr6  | 26501449 | 26510650 | + | 2895  | 14.48687 | 0.083532 | -0.8981  | 0.267768 | -3.35401 | 0.00113  | 0.010849 | 1 |
| ENSG0000 | mucosal h | Inflamed | SPRED2    | protein_cc | chr2  | 65537985 | 65659771 | - | 5154  | 2548.415 | 0        | 0.565982 | 0.168757 | 3.35382  | 0.001131 | 0.010851 | 1 |
| ENSG0000 | mucosal h | Inflamed | TRAFD1    | protein_cc | chr12 | 1.13E+08 | 1.13E+08 | + | 3934  | 2011.375 | 0        | -0.39781 | 0.118621 | -3.35359 | 0.001131 | 0.010853 | 1 |



|          |           |          |                     |            |          |          |          |      |          |          |          |          |          |          |          |          |   |
|----------|-----------|----------|---------------------|------------|----------|----------|----------|------|----------|----------|----------|----------|----------|----------|----------|----------|---|
| ENSG0000 | mucosal h | Inflamed | RP11-103J antisense | chr20      | 10653576 | 10975572 | +        | 1279 | 6.546539 | 0.140811 | 0.604673 | 0.180308 | 3.353557 | 0.001132 | 0.010853 | 1        |   |
| ENSG0000 | mucosal h | Inflamed | NTN4                | protein_cc | chr12    | 96051583 | 96184930 | -    | 4166     | 713.8401 | 0        | 0.60274  | 0.179775 | 3.352741 | 0.001135 | 0.010877 | 1 |
| ENSG0000 | mucosal h | Inflamed | TRAK1               | protein_cc | chr3     | 42055294 | 42267381 | +    | 10992    | 5640.623 | 0        | 0.457817 | 0.136589 | 3.351775 | 0.001138 | 0.010904 | 1 |
| ENSG0000 | mucosal h | Inflamed | RP11-493L           | lincRNA    | chr12    | 47747537 | 47763718 | +    | 540      | 3.326969 | 0.477327 | -0.70899 | 0.211526 | -3.35177 | 0.001138 | 0.010904 | 1 |
| ENSG0000 | mucosal h | Inflamed | ENGASE              | protein_cc | chr17    | 77071021 | 77084681 | +    | 6173     | 2768.788 | 0        | 0.571327 | 0.170494 | 3.351014 | 0.001141 | 0.010927 | 1 |
| ENSG0000 | mucosal h | Inflamed | RP11-685H           | protein_cc | chr2     | 90537839 | 90538397 | -    | 384      | 1.806683 | 0.699284 | -0.70829 | 0.211382 | -3.35077 | 0.001142 | 0.010931 | 1 |
| ENSG0000 | mucosal h | Inflamed | DUSP7               | protein_cc | chr3     | 52082935 | 52090566 | -    | 5648     | 1340.737 | 0        | -0.48349 | 0.144315 | -3.35023 | 0.001144 | 0.010946 | 1 |
| ENSG0000 | mucosal h | Inflamed | BATF2               | protein_cc | chr11    | 64755415 | 64764517 | -    | 2844     | 2136.432 | 0        | -0.61222 | 0.182749 | -3.35005 | 0.001144 | 0.010949 | 1 |
| ENSG0000 | mucosal h | Inflamed | RNF122              | protein_cc | chr8     | 33405273 | 33424643 | -    | 1868     | 362.716  | 0        | -0.49003 | 0.146284 | -3.34987 | 0.001145 | 0.010951 | 1 |
| ENSG0000 | mucosal h | Inflamed | ADRA2C              | protein_cc | chr4     | 3768075  | 3770251  | +    | 2177     | 63.44869 | 0.00716  | -0.9077  | 0.271012 | -3.34929 | 0.001147 | 0.010968 | 1 |
| ENSG0000 | mucosal h | Inflamed | RP11-730K           | antisense  | chr11    | 1.21E+08 | 1.21E+08 | -    | 2908     | 13.00239 | 0.095465 | 0.898485 | 0.268326 | 3.348488 | 0.00115  | 0.010992 | 1 |
| ENSG0000 | mucosal h | Inflamed | OAZ2                | protein_cc | chr15    | 64979772 | 64995480 | -    | 7671     | 2405.107 | 0        | -0.35347 | 0.105569 | -3.34822 | 0.001151 | 0.010998 | 1 |
| ENSG0000 | mucosal h | Inflamed | COL4A4              | protein_cc | chr2     | 2.28E+08 | 2.28E+08 | -    | 9895     | 342.2387 | 0        | -0.93651 | 0.279745 | -3.34774 | 0.001153 | 0.011011 | 1 |
| ENSG0000 | mucosal h | Inflamed | RP11-115K           | antisense  | chr17    | 36105206 | 36108563 | +    | 660      | 22.98329 | 0.078759 | 1.051277 | 0.314084 | 3.347117 | 0.001155 | 0.011029 | 1 |
| ENSG0000 | mucosal h | Inflamed | STAC                | protein_cc | chr3     | 36421836 | 36589499 | +    | 4396     | 16.90453 | 0.102625 | -0.8954  | 0.267592 | -3.34614 | 0.001159 | 0.01106  | 1 |
| ENSG0000 | mucosal h | Inflamed | HAGHL               | protein_cc | chr16    | 776936   | 785525   | +    | 4890     | 106.1313 | 0        | -0.64901 | 0.194022 | -3.34501 | 0.001163 | 0.011097 | 1 |
| ENSG0000 | mucosal h | Inflamed | MIB2                | protein_cc | chr1     | 1550795  | 1565990  | +    | 8767     | 1785.327 | 0        | 0.333297 | 0.099667 | 3.344098 | 0.001167 | 0.011124 | 1 |
| ENSG0000 | mucosal h | Inflamed | ACO2                | protein_cc | chr22    | 41865129 | 41924993 | +    | 4041     | 11566.55 | 0        | 0.358112 | 0.10709  | 3.344036 | 0.001167 | 0.011124 | 1 |
| ENSG0000 | mucosal h | Inflamed | RP11-134F           | lincRNA    | chr1     | 2.03E+08 | 2.03E+08 | -    | 2725     | 6.632458 | 0.231504 | -0.74497 | 0.22279  | -3.34382 | 0.001168 | 0.011127 | 1 |
| ENSG0000 | mucosal h | Inflamed | CD48                | protein_cc | chr1     | 1.61E+08 | 1.61E+08 | -    | 2494     | 835.5632 | 0        | -0.70609 | 0.211211 | -3.34304 | 0.001171 | 0.011149 | 1 |
| ENSG0000 | mucosal h | Inflamed | TSNARE1             | protein_cc | chr8     | 1.43E+08 | 1.43E+08 | -    | 4060     | 454.5036 | 0        | 0.459429 | 0.137431 | 3.342986 | 0.001171 | 0.011149 | 1 |
| ENSG0000 | mucosal h | Inflamed | CTD-2020I           | antisense  | chr17    | 43322553 | 43326203 | -    | 1073     | 26.79475 | 0        | 0.506013 | 0.151383 | 3.342597 | 0.001172 | 0.011159 | 1 |
| ENSG0000 | mucosal h | Inflamed | PLAGL1              | protein_cc | chr6     | 1.44E+08 | 1.44E+08 | -    | 6178     | 1440.647 | 0        | 0.623735 | 0.186636 | 3.341986 | 0.001175 | 0.011177 | 1 |
| ENSG0000 | mucosal h | Inflamed | PLCD3               | protein_cc | chr17    | 43186335 | 43210721 | -    | 6750     | 11066.26 | 0        | 0.647371 | 0.193726 | 3.341685 | 0.001176 | 0.011184 | 1 |
| ENSG0000 | mucosal h | Inflamed | RP13-131K           | lincRNA    | chr3     | 49022918 | 49023396 | -    | 479      | 13.16229 | 0.00716  | 0.487028 | 0.145757 | 3.341375 | 0.001177 | 0.011191 | 1 |
| ENSG0000 | mucosal h | Inflamed | AF127936            | lincRNA    | chr21    | 16191164 | 16254296 | -    | 7034     | 74.7327  | 0        | 0.603615 | 0.180724 | 3.339977 | 0.001182 | 0.011238 | 1 |
| ENSG0000 | mucosal h | Inflamed | MT-TT               | Mt_tRNA    | chrM     | 15888    | 15953    | +    | 66       | 184.3723 | 0.004773 | 0.74697  | 0.223658 | 3.339791 | 0.001183 | 0.011241 | 1 |
| ENSG0000 | mucosal h | Inflamed | PGAP2               | protein_cc | chr11    | 3818954  | 3847601  | +    | 3781     | 814.315  | 0        | 0.262621 | 0.078657 | 3.338787 | 0.001187 | 0.011269 | 1 |
| ENSG0000 | mucosal h | Inflamed | F5                  | protein_cc | chr1     | 1.69E+08 | 1.7E+08  | -    | 7158     | 229.1671 | 0.004773 | -1.03864 | 0.31109  | -3.33871 | 0.001187 | 0.011269 | 1 |
| ENSG0000 | mucosal h | Inflamed | HDAC7               | protein_cc | chr12    | 48176505 | 48226915 | -    | 9936     | 3417.296 | 0        | -0.6141  | 0.183938 | -3.33864 | 0.001187 | 0.011269 | 1 |
| ENSG0000 | mucosal h | Inflamed | FOLH1               | protein_cc | chr11    | 49168187 | 49230222 | -    | 3824     | 124.5274 | 0.02148  | -1.23032 | 0.368521 | -3.33855 | 0.001188 | 0.011269 | 1 |
| ENSG0000 | mucosal h | Inflamed | FAM86HP             | pseudoger  | chr3     | 1.3E+08  | 1.3E+08  | -    | 1301     | 41.82816 | 0.009547 | 0.571795 | 0.171326 | 3.337475 | 0.001192 | 0.011305 | 1 |
| ENSG0000 | mucosal h | Inflamed | GNB1L               | protein_cc | chr22    | 19770747 | 19842462 | -    | 6988     | 151.3174 | 0        | -0.40679 | 0.121957 | -3.33548 | 0.0012   | 0.011371 | 1 |
| ENSG0000 | mucosal h | Inflamed | ZNF844              | protein_cc | chr19    | 12175514 | 12192380 | +    | 6620     | 451.611  | 0        | 0.587839 | 0.176242 | 3.335399 | 0.0012   | 0.011371 | 1 |
| ENSG0000 | mucosal h | Inflamed | LINC0108E           | antisense  | chr4     | 79892902 | 80229952 | +    | 3995     | 8.100239 | 0.073986 | 0.687938 | 0.206261 | 3.335277 | 0.0012   | 0.011371 | 1 |
| ENSG0000 | mucosal h | Inflamed | LINC0051S           | lincRNA    | chr14    | 51771134 | 51795104 | -    | 682      | 4.422434 | 0.21957  | -0.60832 | 0.182392 | -3.33522 | 0.001201 | 0.011371 | 1 |
| ENSG0000 | mucosal h | Inflamed | C4orf36             | protein_cc | chr4     | 87797358 | 87857354 | -    | 5270     | 159.1599 | 0        | 0.446165 | 0.133787 | 3.334898 | 0.001202 | 0.011379 | 1 |
| ENSG0000 | mucosal h | Inflamed | ZSCAN9              | protein_cc | chr6     | 28192664 | 28201260 | +    | 3705     | 338.0191 | 0        | 0.459322 | 0.13776  | 3.334227 | 0.001205 | 0.011399 | 1 |
| ENSG0000 | mucosal h | Inflamed | TRBV5-1             | TR_V_gene  | chr7     | 1.42E+08 | 1.42E+08 | +    | 652      | 42.92124 | 0.004773 | -0.7687  | 0.230569 | -3.33393 | 0.001206 | 0.011404 | 1 |
| ENSG0000 | mucosal h | Inflamed | UCN2                | protein_cc | chr3     | 48599160 | 48601206 | -    | 1481     | 63.98807 | 0.140811 | -1.64002 | 0.491938 | -3.33378 | 0.001206 | 0.011404 | 1 |

|          |           |          |           |                  |          |          |   |       |          |          |          |          |          |          |          |   |
|----------|-----------|----------|-----------|------------------|----------|----------|---|-------|----------|----------|----------|----------|----------|----------|----------|---|
| ENSG0000 | mucosal h | Inflamed | FBXO2     | protein_cc chr1  | 11708424 | 11715842 | - | 2333  | 74.20048 | 0        | -0.87043 | 0.261097 | -3.33375 | 0.001206 | 0.011404 | 1 |
| ENSG0000 | mucosal h | Inflamed | R3HDM4    | protein_cc chr19 | 896503   | 913240   | - | 2961  | 3778.84  | 0        | -0.3681  | 0.110422 | -3.33362 | 0.001207 | 0.011405 | 1 |
| ENSG0000 | mucosal h | Inflamed | PGLYRP3   | protein_cc chr1  | 1.53E+08 | 1.53E+08 | - | 1173  | 6.875895 | 0.46778  | -1.0619  | 0.318606 | -3.33294 | 0.00121  | 0.011422 | 1 |
| ENSG0000 | mucosal h | Inflamed | RP11-285F | antisense chr1   | 2.26E+08 | 2.26E+08 | - | 348   | 145.3007 | 0        | 0.524649 | 0.157413 | 3.332936 | 0.00121  | 0.011422 | 1 |
| ENSG0000 | mucosal h | Inflamed | AC097639  | pseudoger chr3   | 32232239 | 32233119 | + | 881   | 8.782816 | 0.150358 | 0.729728 | 0.218966 | 3.332609 | 0.001211 | 0.01143  | 1 |
| ENSG0000 | mucosal h | Inflamed | GRAMD1A   | protein_cc chr19 | 35485688 | 35517375 | + | 5942  | 2407.888 | 0        | -0.66047 | 0.198197 | -3.33241 | 0.001212 | 0.011433 | 1 |
| ENSG0000 | mucosal h | Inflamed | MRAS      | protein_cc chr3  | 1.38E+08 | 1.38E+08 | + | 6315  | 488.7924 | 0        | -0.67083 | 0.201347 | -3.3317  | 0.001214 | 0.011455 | 1 |
| ENSG0000 | mucosal h | Inflamed | RHOQP1    | pseudoger chr14  | 50066712 | 50067290 | + | 579   | 31.52983 | 0.009547 | 0.551261 | 0.165489 | 3.331096 | 0.001217 | 0.011474 | 1 |
| ENSG0000 | mucosal h | Inflamed | RRM2      | protein_cc chr2  | 10262455 | 10271545 | + | 4954  | 2046.955 | 0        | -0.57359 | 0.172236 | -3.33026 | 0.00122  | 0.011496 | 1 |
| ENSG0000 | mucosal h | Inflamed | CEBPA-AS1 | antisense chr19  | 33793763 | 33795960 | + | 2198  | 54.52745 | 0.002387 | 0.634245 | 0.190452 | 3.330202 | 0.00122  | 0.011496 | 1 |
| ENSG0000 | mucosal h | Inflamed | PIK3R5    | protein_cc chr17 | 8782233  | 8869029  | - | 7501  | 1174.119 | 0        | -0.68949 | 0.207045 | -3.33017 | 0.00122  | 0.011496 | 1 |
| ENSG0000 | mucosal h | Inflamed | CASP4     | protein_cc chr11 | 1.05E+08 | 1.05E+08 | - | 7256  | 1541.778 | 0        | -0.64396 | 0.193398 | -3.32969 | 0.001222 | 0.011509 | 1 |
| ENSG0000 | mucosal h | Inflamed | GALNT18   | protein_cc chr11 | 11292423 | 11643552 | - | 3627  | 374.8926 | 0        | -0.58913 | 0.17695  | -3.32936 | 0.001224 | 0.011517 | 1 |
| ENSG0000 | mucosal h | Inflamed | HOXB2     | protein_cc chr17 | 46618256 | 46623441 | - | 3460  | 287.9714 | 0        | -0.50972 | 0.153121 | -3.32886 | 0.001226 | 0.011532 | 1 |
| ENSG0000 | mucosal h | Inflamed | MTRNR2L1  | protein_cc chr3  | 96335981 | 96337000 | - | 1020  | 986.4224 | 0        | 0.730802 | 0.219626 | 3.32748  | 0.001231 | 0.011579 | 1 |
| ENSG0000 | mucosal h | Inflamed | IL1R2     | protein_cc chr2  | 1.03E+08 | 1.03E+08 | + | 3073  | 1308.783 | 0        | 0.761443 | 0.228849 | 3.327278 | 0.001232 | 0.011583 | 1 |
| ENSG0000 | mucosal h | Inflamed | AL512428  | miRNA chr6       | 24840195 | 24840293 | - | 99    | 3.756563 | 0.439141 | -0.75948 | 0.228273 | -3.32708 | 0.001233 | 0.011586 | 1 |
| ENSG0000 | mucosal h | Inflamed | NPIPA2    | protein_cc chr16 | 14841923 | 14859270 | + | 1428  | 4.50358  | 0.238663 | 0.577052 | 0.173463 | 3.326655 | 0.001234 | 0.011598 | 1 |
| ENSG0000 | mucosal h | Inflamed | PGM1      | protein_cc chr1  | 64058947 | 64125916 | + | 4090  | 3948.356 | 0        | 0.378804 | 0.113894 | 3.325941 | 0.001237 | 0.01162  | 1 |
| ENSG0000 | mucosal h | Inflamed | RP11-203J | processed_chr9   | 1.31E+08 | 1.31E+08 | - | 1160  | 107.1814 | 0.01432  | 1.15448  | 0.347125 | 3.32583  | 0.001238 | 0.01162  | 1 |
| ENSG0000 | mucosal h | Inflamed | TTR       | protein_cc chr18 | 29171689 | 29178974 | + | 2070  | 18.71599 | 0.042959 | 0.874566 | 0.262996 | 3.325394 | 0.001239 | 0.011632 | 1 |
| ENSG0000 | mucosal h | Inflamed | ANXA6     | protein_cc chr5  | 1.5E+08  | 1.51E+08 | - | 5427  | 4451.086 | 0        | -0.63664 | 0.191454 | -3.32528 | 0.00124  | 0.011632 | 1 |
| ENSG0000 | mucosal h | Inflamed | VSIG2     | protein_cc chr11 | 1.25E+08 | 1.25E+08 | - | 1432  | 4622.332 | 0        | 0.883068 | 0.265593 | 3.324885 | 0.001241 | 0.011643 | 1 |
| ENSG0000 | mucosal h | Inflamed | KCNK12    | protein_cc chr2  | 47743720 | 47798078 | - | 6685  | 54.25776 | 0.004773 | -0.91834 | 0.276274 | -3.32403 | 0.001245 | 0.011671 | 1 |
| ENSG0000 | mucosal h | Inflamed | FAM168B   | protein_cc chr2  | 1.32E+08 | 1.32E+08 | - | 5435  | 5770.408 | 0        | 0.426273 | 0.12825  | 3.323767 | 0.001246 | 0.011677 | 1 |
| ENSG0000 | mucosal h | Inflamed | CHST3     | protein_cc chr10 | 73724123 | 73773322 | + | 6970  | 790.6945 | 0        | -0.88459 | 0.266149 | -3.32366 | 0.001246 | 0.011677 | 1 |
| ENSG0000 | mucosal h | Inflamed | TREML3P   | pseudoger chr6   | 41176292 | 41190382 | - | 1230  | 7.735084 | 0.443914 | -1.03803 | 0.312396 | -3.3228  | 0.00125  | 0.011705 | 1 |
| ENSG0000 | mucosal h | Inflamed | GRTP1     | protein_cc chr13 | 1.14E+08 | 1.14E+08 | - | 2656  | 1183.621 | 0        | 0.629019 | 0.18934  | 3.322165 | 0.001252 | 0.011725 | 1 |
| ENSG0000 | mucosal h | Inflamed | NR5A2     | protein_cc chr1  | 2E+08    | 2E+08    | + | 7795  | 967.3317 | 0        | 0.662926 | 0.199571 | 3.321758 | 0.001254 | 0.011734 | 1 |
| ENSG0000 | mucosal h | Inflamed | FAM47E-S  | protein_cc chr4  | 77172886 | 77232752 | + | 4003  | 132.4129 | 0.002387 | 0.688378 | 0.207237 | 3.321688 | 0.001254 | 0.011734 | 1 |
| ENSG0000 | mucosal h | Inflamed | N6AMT1    | protein_cc chr21 | 30244513 | 30257693 | - | 4865  | 331.864  | 0        | 0.563149 | 0.169558 | 3.321278 | 0.001256 | 0.011746 | 1 |
| ENSG0000 | mucosal h | Inflamed | RP4-669P1 | pseudoger chr22  | 42528550 | 42529005 | + | 456   | 12.59666 | 0.062053 | 0.732406 | 0.220531 | 3.321106 | 0.001257 | 0.011748 | 1 |
| ENSG0000 | mucosal h | Inflamed | CCR2      | protein_cc chr3  | 46395225 | 46402419 | + | 3733  | 420.3556 | 0        | -0.89427 | 0.269301 | -3.3207  | 0.001258 | 0.011759 | 1 |
| ENSG0000 | mucosal h | Inflamed | ZNF665    | protein_cc chr19 | 53662466 | 53696639 | - | 5808  | 43.83294 | 0.004773 | 0.675244 | 0.203379 | 3.320131 | 0.001261 | 0.011777 | 1 |
| ENSG0000 | mucosal h | Inflamed | SLC16A3   | protein_cc chr17 | 80186273 | 80219005 | + | 8995  | 7155.663 | 0        | -0.52493 | 0.158124 | -3.31972 | 0.001262 | 0.011785 | 1 |
| ENSG0000 | mucosal h | Inflamed | ACP2      | protein_cc chr11 | 47260853 | 47270457 | - | 3484  | 2668.389 | 0        | -0.23079 | 0.06952  | -3.3197  | 0.001262 | 0.011785 | 1 |
| ENSG0000 | mucosal h | Inflamed | LEAP2     | protein_cc chr5  | 1.32E+08 | 1.32E+08 | + | 2405  | 120.3461 | 0        | 0.869412 | 0.261951 | 3.318985 | 0.001265 | 0.011808 | 1 |
| ENSG0000 | mucosal h | Inflamed | SPRY2     | protein_cc chr13 | 80910111 | 80915086 | - | 3289  | 1721.523 | 0        | 0.481915 | 0.145209 | 3.318765 | 0.001266 | 0.011808 | 1 |
| ENSG0000 | mucosal h | Inflamed | ZNF816    | protein_cc chr19 | 53430388 | 53466164 | - | 5644  | 229.7613 | 0        | 0.638178 | 0.192299 | 3.318682 | 0.001266 | 0.011808 | 1 |
| ENSG0000 | mucosal h | Inflamed | SH3TC1    | protein_cc chr4  | 8183799  | 8243530  | + | 10593 | 1155.635 | 0        | -0.63443 | 0.191171 | -3.31864 | 0.001267 | 0.011808 | 1 |

|          |           |          |           |            |       |          |          |   |       |          |          |          |          |          |          |          |   |
|----------|-----------|----------|-----------|------------|-------|----------|----------|---|-------|----------|----------|----------|----------|----------|----------|----------|---|
| ENSG0000 | mucosal h | Inflamed | PHLDA1    | protein_cc | chr12 | 76419227 | 76427712 | - | 8069  | 2641.68  | 0        | -0.8933  | 0.269217 | -3.31813 | 0.001269 | 0.011823 | 1 |
| ENSG0000 | mucosal h | Inflamed | CAMK2N2   | protein_cc | chr3  | 1.84E+08 | 1.84E+08 | - | 1362  | 10.98568 | 0.052506 | -0.83102 | 0.250483 | -3.31767 | 0.001271 | 0.011837 | 1 |
| ENSG0000 | mucosal h | Inflamed | RP11-834C | pseudoger  | chr12 | 54470622 | 54475687 | - | 1390  | 19.91647 | 0.023866 | -0.68607 | 0.206815 | -3.3173  | 0.001272 | 0.011847 | 1 |
| ENSG0000 | mucosal h | Inflamed | IL37      | protein_cc | chr2  | 1.14E+08 | 1.14E+08 | + | 839   | 7.071599 | 0.221957 | 0.806458 | 0.24313  | 3.316987 | 0.001273 | 0.011854 | 1 |
| ENSG0000 | mucosal h | Inflamed | SLC22A18  | protein_cc | chr11 | 2909010  | 2924970  | - | 1782  | 666.5418 | 0        | 0.716251 | 0.215977 | 3.316328 | 0.001276 | 0.011875 | 1 |
| ENSG0000 | mucosal h | Inflamed | PCSK2     | protein_cc | chr20 | 17206752 | 17465223 | + | 7078  | 129.0191 | 0.011933 | 1.240459 | 0.374165 | 3.315269 | 0.00128  | 0.011912 | 1 |
| ENSG0000 | mucosal h | Inflamed | RP11-244C | sense_ove  | chr9  | 1.25E+08 | 1.25E+08 | - | 3779  | 130.8974 | 0.002387 | 0.494163 | 0.149111 | 3.314075 | 0.001285 | 0.011953 | 1 |
| ENSG0000 | mucosal h | Inflamed | IGLV10-54 | IG_V_gene  | chr22 | 22569184 | 22569660 | + | 365   | 2372.797 | 0.00716  | -1.27054 | 0.383444 | -3.31349 | 0.001288 | 0.01197  | 1 |
| ENSG0000 | mucosal h | Inflamed | SEMA4D    | protein_cc | chr9  | 91975702 | 92113045 | - | 14160 | 3351.649 | 0        | -0.58425 | 0.176329 | -3.31342 | 0.001288 | 0.01197  | 1 |
| ENSG0000 | mucosal h | Inflamed | RP11-5411 | sense_ove  | chr10 | 1.06E+08 | 1.06E+08 | - | 2388  | 149.8377 | 0.002387 | 0.58749  | 0.177344 | 3.312717 | 0.001291 | 0.011993 | 1 |
| ENSG0000 | mucosal h | Inflamed | PLD3      | protein_cc | chr19 | 40854363 | 40886346 | + | 5184  | 8170.141 | 0        | -0.42442 | 0.128122 | -3.31261 | 0.001291 | 0.011993 | 1 |
| ENSG0000 | mucosal h | Inflamed | RP11-455F | antisense  | chr16 | 30194826 | 30196278 | - | 811   | 40.42482 | 0.00716  | -0.78415 | 0.236742 | -3.31226 | 0.001293 | 0.012002 | 1 |
| ENSG0000 | mucosal h | Inflamed | LINC00941 | lincRNA    | chr12 | 30947977 | 30955645 | + | 2856  | 13.74463 | 0.231504 | -1.07062 | 0.323408 | -3.31044 | 0.0013   | 0.012068 | 1 |
| ENSG0000 | mucosal h | Inflamed | CECR6     | protein_cc | chr22 | 17597189 | 17602257 | - | 5069  | 64.95943 | 0.00716  | -0.76484 | 0.231073 | -3.30994 | 0.001303 | 0.012083 | 1 |
| ENSG0000 | mucosal h | Inflamed | LG11      | protein_cc | chr10 | 95517566 | 95557916 | + | 2854  | 17.95943 | 0.097852 | 1.146534 | 0.346461 | 3.309277 | 0.001305 | 0.012105 | 1 |
| ENSG0000 | mucosal h | Inflamed | ARL11     | protein_cc | chr13 | 50202435 | 50208008 | + | 3826  | 130.7995 | 0        | -0.59867 | 0.180919 | -3.30903 | 0.001306 | 0.01211  | 1 |
| ENSG0000 | mucosal h | Inflamed | LY9       | protein_cc | chr1  | 1.61E+08 | 1.61E+08 | + | 9121  | 388.6301 | 0        | -0.77547 | 0.234417 | -3.30806 | 0.00131  | 0.012143 | 1 |
| ENSG0000 | mucosal h | Inflamed | DEPTOR    | protein_cc | chr8  | 1.21E+08 | 1.21E+08 | + | 2622  | 352.3461 | 0        | 0.633544 | 0.191588 | 3.306803 | 0.001316 | 0.012188 | 1 |
| ENSG0000 | mucosal h | Inflamed | HIF3A     | protein_cc | chr19 | 46800303 | 46846690 | + | 8371  | 171.7613 | 0.00716  | 1.071622 | 0.324142 | 3.306028 | 0.001319 | 0.012214 | 1 |
| ENSG0000 | mucosal h | Inflamed | RP5-857K2 | pseudoger  | chr1  | 568137   | 568818   | + | 682   | 2554.248 | 0        | 0.520001 | 0.15736  | 3.304537 | 0.001325 | 0.012269 | 1 |
| ENSG0000 | mucosal h | Inflamed | CLDN1     | protein_cc | chr3  | 1.9E+08  | 1.9E+08  | - | 3663  | 406.5871 | 0.004773 | -1.13605 | 0.343802 | -3.30438 | 0.001326 | 0.012271 | 1 |
| ENSG0000 | mucosal h | Inflamed | PBLD      | protein_cc | chr10 | 70042417 | 70092806 | - | 5172  | 1321.263 | 0        | 1.001025 | 0.302957 | 3.30418  | 0.001327 | 0.012274 | 1 |
| ENSG0000 | mucosal h | Inflamed | CYP24A1   | protein_cc | chr20 | 52769988 | 52790512 | - | 3972  | 77.91647 | 0.217184 | -1.6135  | 0.488346 | -3.30402 | 0.001328 | 0.012276 | 1 |
| ENSG0000 | mucosal h | Inflamed | GRAMD4    | protein_cc | chr22 | 46971909 | 47075688 | + | 4886  | 5246.093 | 0        | 0.512295 | 0.155058 | 3.303902 | 0.001328 | 0.012276 | 1 |
| ENSG0000 | mucosal h | Inflamed | ANKLE1    | protein_cc | chr19 | 17392454 | 17398455 | + | 3569  | 48.37232 | 0.016706 | -0.7318  | 0.221513 | -3.30364 | 0.001329 | 0.012282 | 1 |
| ENSG0000 | mucosal h | Inflamed | ZDHHC1    | protein_cc | chr16 | 67428322 | 67450736 | - | 3261  | 389.9332 | 0        | 0.398812 | 0.120758 | 3.302576 | 0.001334 | 0.01232  | 1 |
| ENSG0000 | mucosal h | Inflamed | SMIM7     | protein_cc | chr19 | 16741562 | 16771253 | - | 6020  | 1074.695 | 0        | 0.234283 | 0.070949 | 3.302144 | 0.001336 | 0.012333 | 1 |
| ENSG0000 | mucosal h | Inflamed | BCL2L12   | protein_cc | chr19 | 50168823 | 50177173 | + | 1743  | 494.8496 | 0        | -0.36548 | 0.110698 | -3.30161 | 0.001338 | 0.01235  | 1 |
| ENSG0000 | mucosal h | Inflamed | AGAP2     | protein_cc | chr12 | 58118980 | 58135940 | - | 5292  | 559.4272 | 0        | -0.7305  | 0.221277 | -3.30128 | 0.001339 | 0.012359 | 1 |
| ENSG0000 | mucosal h | Inflamed | MIR1587   | lincRNA    | chrX  | 39696790 | 39707612 | - | 1976  | 4.599045 | 0.21957  | -0.60812 | 0.184252 | -3.3005  | 0.001343 | 0.012385 | 1 |
| ENSG0000 | mucosal h | Inflamed | GFPT2     | protein_cc | chr5  | 1.8E+08  | 1.8E+08  | - | 4780  | 379.6038 | 0.002387 | -1.13125 | 0.342851 | -3.29952 | 0.001347 | 0.012418 | 1 |
| ENSG0000 | mucosal h | Inflamed | RUFY4     | protein_cc | chr2  | 2.19E+08 | 2.19E+08 | + | 4357  | 51.49881 | 0.01432  | -0.94557 | 0.286584 | -3.29944 | 0.001347 | 0.012418 | 1 |
| ENSG0000 | mucosal h | Inflamed | ALDH3B2   | protein_cc | chr11 | 67429633 | 67448671 | - | 3235  | 28.04296 | 0.033413 | -1.01907 | 0.308897 | -3.29907 | 0.001349 | 0.012429 | 1 |
| ENSG0000 | mucosal h | Inflamed | LRRFIP2   | protein_cc | chr3  | 37094117 | 37225180 | - | 10674 | 2353.905 | 0        | 0.416302 | 0.126194 | 3.298895 | 0.00135  | 0.012431 | 1 |
| ENSG0000 | mucosal h | Inflamed | ST6GALNA  | protein_cc | chr9  | 1.31E+08 | 1.31E+08 | - | 2630  | 1968.535 | 0        | -0.43668 | 0.132397 | -3.2983  | 0.001352 | 0.012451 | 1 |
| ENSG0000 | mucosal h | Inflamed | LRRC26    | protein_cc | chr9  | 1.4E+08  | 1.4E+08  | - | 1209  | 999.4439 | 0.00716  | 1.146084 | 0.347491 | 3.29817  | 0.001353 | 0.012452 | 1 |
| ENSG0000 | mucosal h | Inflamed | TKT       | protein_cc | chr3  | 53258723 | 53290068 | - | 9507  | 9892.785 | 0        | -0.29305 | 0.088873 | -3.29741 | 0.001356 | 0.012477 | 1 |
| ENSG0000 | mucosal h | Inflamed | FBXO25    | protein_cc | chr8  | 356428   | 421225   | + | 4004  | 662.642  | 0        | 0.396456 | 0.120236 | 3.297306 | 0.001356 | 0.012477 | 1 |
| ENSG0000 | mucosal h | Inflamed | HOXA2     | protein_cc | chr7  | 27139721 | 27142430 | - | 2066  | 84.87112 | 0.004773 | 0.744183 | 0.225729 | 3.296794 | 0.001359 | 0.012494 | 1 |
| ENSG0000 | mucosal h | Inflamed | TEN1-CDK  | processed  | chr17 | 73975312 | 74002080 | + | 3898  | 83.99761 | 0.01432  | 0.717059 | 0.217531 | 3.296351 | 0.001361 | 0.012506 | 1 |

|          |           |          |           |            |       |          |          |   |       |          |          |          |          |          |          |          |   |
|----------|-----------|----------|-----------|------------|-------|----------|----------|---|-------|----------|----------|----------|----------|----------|----------|----------|---|
| ENSG0000 | mucosal h | Inflamed | G6PD      | protein_cc | chrX  | 1.54E+08 | 1.54E+08 | - | 3709  | 1935.864 | 0        | -0.39747 | 0.120582 | -3.29626 | 0.001361 | 0.012506 | 1 |
| ENSG0000 | mucosal h | Inflamed | CTB-32O4  | lincRNA    | chr19 | 29704142 | 29706722 | + | 817   | 1.792363 | 0.534606 | 0.489137 | 0.1484   | 3.296066 | 0.001362 | 0.01251  | 1 |
| ENSG0000 | mucosal h | Inflamed | RP11-188F | antisense  | chr3  | 43388415 | 43389135 | - | 721   | 13.8926  | 0.097852 | 0.859429 | 0.260806 | 3.295285 | 0.001365 | 0.012537 | 1 |
| ENSG0000 | mucosal h | Inflamed | TAPSAR1   | lincRNA    | chr6  | 32811863 | 32814272 | + | 1951  | 681.4726 | 0        | -0.47119 | 0.143029 | -3.29434 | 0.001369 | 0.01257  | 1 |
| ENSG0000 | mucosal h | Inflamed | PON3      | protein_cc | chr7  | 94989256 | 95025680 | - | 4040  | 52.94511 | 0.004773 | 0.722773 | 0.219407 | 3.294213 | 0.00137  | 0.012571 | 1 |
| ENSG0000 | mucosal h | Inflamed | RP11-73M  | antisense  | chr1  | 32037186 | 32041174 | - | 591   | 94.15274 | 0.004773 | 0.879769 | 0.267116 | 3.293578 | 0.001373 | 0.012588 | 1 |
| ENSG0000 | mucosal h | Inflamed | WDR59     | protein_cc | chr16 | 74907468 | 75034071 | - | 7218  | 1206.699 | 0        | 0.304468 | 0.092443 | 3.293568 | 0.001373 | 0.012588 | 1 |
| ENSG0000 | mucosal h | Inflamed | GRAMD3    | protein_cc | chr5  | 1.26E+08 | 1.26E+08 | + | 5051  | 1201.594 | 0        | 0.659297 | 0.200186 | 3.293425 | 0.001373 | 0.01259  | 1 |
| ENSG0000 | mucosal h | Inflamed | SPATA17   | protein_cc | chr1  | 2.18E+08 | 2.18E+08 | + | 6515  | 11.47017 | 0.02148  | 0.523012 | 0.158835 | 3.292799 | 0.001376 | 0.012606 | 1 |
| ENSG0000 | mucosal h | Inflamed | PRAF2     | protein_cc | chrX  | 48928813 | 48931730 | - | 1738  | 457.8329 | 0        | -0.53226 | 0.161642 | -3.29279 | 0.001376 | 0.012606 | 1 |
| ENSG0000 | mucosal h | Inflamed | CTC-273B1 | lincRNA    | chr19 | 48969623 | 48970237 | + | 615   | 7.599045 | 0.040573 | 0.532724 | 0.16184  | 3.291676 | 0.001381 | 0.012646 | 1 |
| ENSG0000 | mucosal h | Inflamed | LRTOMT    | protein_cc | chr11 | 71791382 | 71821828 | + | 6136  | 224.7804 | 0        | 0.284214 | 0.086345 | 3.291599 | 0.001381 | 0.012646 | 1 |
| ENSG0000 | mucosal h | Inflamed | SLC35G2   | protein_cc | chr3  | 1.37E+08 | 1.37E+08 | + | 4287  | 74.97136 | 0.004773 | -0.80731 | 0.245321 | -3.29085 | 0.001385 | 0.012672 | 1 |
| ENSG0000 | mucosal h | Inflamed | LMX1A     | protein_cc | chr1  | 1.65E+08 | 1.65E+08 | - | 4185  | 25.10263 | 0.083532 | 1.058984 | 0.321869 | 3.290104 | 0.001388 | 0.012697 | 1 |
| ENSG0000 | mucosal h | Inflamed | LINC01022 | antisense  | chr7  | 1.58E+08 | 1.58E+08 | + | 394   | 0.949881 | 0.732697 | 0.399993 | 0.121585 | 3.289833 | 0.001389 | 0.012704 | 1 |
| ENSG0000 | mucosal h | Inflamed | RP11-561C | pseudoger  | chr15 | 85798600 | 85873565 | - | 5516  | 23.40811 | 0.02148  | -0.85042 | 0.25857  | -3.28894 | 0.001393 | 0.012736 | 1 |
| ENSG0000 | mucosal h | Inflamed | CYP2B7P1  | pseudoger  | chr19 | 41430124 | 41456565 | + | 4064  | 123.3914 | 0.011933 | 1.135225 | 0.345207 | 3.288533 | 0.001395 | 0.012748 | 1 |
| ENSG0000 | mucosal h | Inflamed | RAD52     | protein_cc | chr12 | 1021243  | 1099219  | - | 4190  | 583.5704 | 0        | 0.803441 | 0.244367 | 3.287845 | 0.001398 | 0.012772 | 1 |
| ENSG0000 | mucosal h | Inflamed | AJAP1     | protein_cc | chr1  | 4714792  | 4852594  | + | 12405 | 106.7327 | 0.009547 | -1.16391 | 0.354092 | -3.28703 | 0.001402 | 0.012801 | 1 |
| ENSG0000 | mucosal h | Inflamed | SLC10A5   | protein_cc | chr8  | 82605842 | 82608409 | - | 2568  | 54.09069 | 0.009547 | 0.979474 | 0.298002 | 3.28681  | 0.001403 | 0.012805 | 1 |
| ENSG0000 | mucosal h | Inflamed | RBPM5-AS  | antisense  | chr8  | 30239635 | 30242917 | - | 1171  | 16.65632 | 0.0358   | -0.6561  | 0.199631 | -3.28655 | 0.001404 | 0.012807 | 1 |
| ENSG0000 | mucosal h | Inflamed | CHST10    | protein_cc | chr2  | 1.01E+08 | 1.01E+08 | - | 4482  | 134.3747 | 0        | -0.67306 | 0.204794 | -3.28654 | 0.001404 | 0.012807 | 1 |
| ENSG0000 | mucosal h | Inflamed | CCL24     | protein_cc | chr7  | 75440983 | 75452674 | - | 617   | 1517.63  | 0        | -0.68227 | 0.207609 | -3.2863  | 0.001405 | 0.012812 | 1 |
| ENSG0000 | mucosal h | Inflamed | DCAF4     | protein_cc | chr14 | 73393040 | 73426411 | + | 5581  | 408.7232 | 0        | 0.387133 | 0.117805 | 3.286222 | 0.001405 | 0.012812 | 1 |
| ENSG0000 | mucosal h | Inflamed | RP11-158M | antisense  | chr15 | 86298172 | 86299468 | - | 855   | 6.27685  | 0.183771 | 0.676576 | 0.205951 | 3.285131 | 0.00141  | 0.012852 | 1 |
| ENSG0000 | mucosal h | Inflamed | SRSF8     | pseudoger  | chr11 | 94800056 | 94804388 | + | 4331  | 583.3437 | 0        | 0.492128 | 0.149827 | 3.284651 | 0.001412 | 0.012867 | 1 |
| ENSG0000 | mucosal h | Inflamed | AMN       | protein_cc | chr14 | 1.03E+08 | 1.03E+08 | + | 4646  | 5983.274 | 0        | 0.915186 | 0.278643 | 3.284443 | 0.001413 | 0.012871 | 1 |
| ENSG0000 | mucosal h | Inflamed | RP11-500C | antisense  | chr6  | 17706488 | 17707575 | + | 1088  | 40.0358  | 0        | -0.61118 | 0.186109 | -3.28397 | 0.001416 | 0.012886 | 1 |
| ENSG0000 | mucosal h | Inflamed | WVVOX     | protein_cc | chr16 | 78133310 | 79246564 | + | 4886  | 222.9809 | 0        | -0.33997 | 0.10353  | -3.28377 | 0.001416 | 0.012887 | 1 |
| ENSG0000 | mucosal h | Inflamed | MAPKAPK1  | protein_cc | chr12 | 1.12E+08 | 1.12E+08 | + | 5576  | 1320.215 | 0        | 0.350761 | 0.106818 | 3.283728 | 0.001417 | 0.012887 | 1 |
| ENSG0000 | mucosal h | Inflamed | BHLHE22   | protein_cc | chr8  | 65492814 | 65496181 | + | 3368  | 122.8401 | 0.019093 | -1.07726 | 0.328088 | -3.28346 | 0.001418 | 0.012894 | 1 |
| ENSG0000 | mucosal h | Inflamed | AC007395  | pseudoger  | chr2  | 71037930 | 71038606 | - | 677   | 0.902148 | 0.792363 | 0.404517 | 0.123202 | 3.283353 | 0.001418 | 0.012894 | 1 |
| ENSG0000 | mucosal h | Inflamed | CAMP      | protein_cc | chr3  | 48264837 | 48266981 | + | 745   | 8.221957 | 0.25537  | -0.9332  | 0.284273 | -3.28275 | 0.001421 | 0.012914 | 1 |
| ENSG0000 | mucosal h | Inflamed | LIPN      | protein_cc | chr10 | 90521163 | 90537999 | + | 1197  | 7.47494  | 0.448687 | -1.05869 | 0.32253  | -3.28246 | 0.001422 | 0.012922 | 1 |
| ENSG0000 | mucosal h | Inflamed | FCHO1     | protein_cc | chr19 | 17858527 | 17899377 | + | 5700  | 557.0835 | 0        | -0.53837 | 0.164023 | -3.28229 | 0.001423 | 0.012924 | 1 |
| ENSG0000 | mucosal h | Inflamed | PREX1     | protein_cc | chr20 | 47240790 | 47444420 | - | 7044  | 4081.931 | 0        | -0.70666 | 0.215309 | -3.28207 | 0.001424 | 0.012927 | 1 |
| ENSG0000 | mucosal h | Inflamed | LINC00958 | lincRNA    | chr11 | 12984057 | 13011095 | - | 2202  | 1.081146 | 0.75179  | 0.467443 | 0.14243  | 3.281917 | 0.001425 | 0.012927 | 1 |
| ENSG0000 | mucosal h | Inflamed | SERINC2   | protein_cc | chr1  | 31882412 | 31907525 | + | 3520  | 13701.91 | 0        | 0.617119 | 0.188037 | 3.281905 | 0.001425 | 0.012927 | 1 |
| ENSG0000 | mucosal h | Inflamed | DNAJB9    | protein_cc | chr7  | 1.08E+08 | 1.08E+08 | + | 2837  | 1327.58  | 0        | -0.68503 | 0.208757 | -3.28147 | 0.001427 | 0.012941 | 1 |
| ENSG0000 | mucosal h | Inflamed | C1orf61   | protein_cc | chr1  | 1.56E+08 | 1.56E+08 | - | 12314 | 20.03819 | 0.016706 | -0.78131 | 0.238117 | -3.28119 | 0.001428 | 0.012947 | 1 |

|          |           |          |           |            |       |          |          |   |       |          |          |          |          |          |          |          |   |
|----------|-----------|----------|-----------|------------|-------|----------|----------|---|-------|----------|----------|----------|----------|----------|----------|----------|---|
| ENSG0000 | mucosal h | Inflamed | SIT1      | protein_cc | chr9  | 35649292 | 35650937 | - | 1286  | 205.895  | 0        | -0.69906 | 0.213093 | -3.28052 | 0.001431 | 0.012971 | 1 |
| ENSG0000 | mucosal h | Inflamed | ASPG      | protein_cc | chr14 | 1.05E+08 | 1.05E+08 | + | 3305  | 240.0621 | 0.002387 | 1.059448 | 0.322964 | 3.280389 | 0.001432 | 0.012972 | 1 |
| ENSG0000 | mucosal h | Inflamed | TTC7B     | protein_cc | chr14 | 91006932 | 91282823 | - | 5244  | 321.1504 | 0        | -0.56023 | 0.170792 | -3.2802  | 0.001433 | 0.012975 | 1 |
| ENSG0000 | mucosal h | Inflamed | HIST1H2BJ | protein_cc | chr6  | 27093676 | 27100541 | - | 1100  | 47.37947 | 0        | -0.55429 | 0.16899  | -3.28    | 0.001434 | 0.012979 | 1 |
| ENSG0000 | mucosal h | Inflamed | PPP1R17   | protein_cc | chr7  | 31726329 | 31748069 | + | 2384  | 1.286396 | 0.789976 | -0.63884 | 0.194777 | -3.27984 | 0.001434 | 0.012979 | 1 |
| ENSG0000 | mucosal h | Inflamed | RAP1GAP   | protein_cc | chr1  | 21922708 | 21995801 | - | 5650  | 3014.356 | 0        | 0.97167  | 0.296261 | 3.279773 | 0.001435 | 0.012979 | 1 |
| ENSG0000 | mucosal h | Inflamed | RPS14P3   | pseudoger  | chr1  | 19934608 | 19935062 | + | 455   | 20.29833 | 0.01432  | 0.675363 | 0.205938 | 3.279456 | 0.001436 | 0.012988 | 1 |
| ENSG0000 | mucosal h | Inflamed | MRPL35    | protein_cc | chr2  | 86426478 | 86440917 | + | 3829  | 1334.301 | 0        | 0.530803 | 0.161879 | 3.279008 | 0.001438 | 0.013002 | 1 |
| ENSG0000 | mucosal h | Inflamed | MRVI1-AS: | antisense  | chr11 | 10562819 | 10621479 | + | 1403  | 2.207637 | 0.582339 | -0.63471 | 0.193595 | -3.27854 | 0.00144  | 0.013017 | 1 |
| ENSG0000 | mucosal h | Inflamed | RPIA      | protein_cc | chr2  | 88991162 | 89050452 | + | 1848  | 832.4391 | 0        | 0.336052 | 0.102517 | 3.278026 | 0.001443 | 0.013034 | 1 |
| ENSG0000 | mucosal h | Inflamed | MIR192    | miRNA      | chr11 | 64658609 | 64658718 | - | 110   | 100.8043 | 0.009547 | 0.953385 | 0.290893 | 3.277439 | 0.001445 | 0.013054 | 1 |
| ENSG0000 | mucosal h | Inflamed | RP11-47G: | pseudoger  | chr10 | 1.26E+08 | 1.26E+08 | - | 525   | 7.331742 | 0.210024 | -0.82156 | 0.250722 | -3.27679 | 0.001448 | 0.013077 | 1 |
| ENSG0000 | mucosal h | Inflamed | MLXIP     | protein_cc | chr12 | 1.23E+08 | 1.23E+08 | + | 13905 | 19604.41 | 0        | 0.522392 | 0.159431 | 3.276607 | 0.001449 | 0.01308  | 1 |
| ENSG0000 | mucosal h | Inflamed | ARHGAP15  | protein_cc | chr2  | 1.44E+08 | 1.45E+08 | + | 7743  | 250.4893 | 0        | -0.68466 | 0.208977 | -3.27627 | 0.001451 | 0.013089 | 1 |
| ENSG0000 | mucosal h | Inflamed | LAIR2     | protein_cc | chr19 | 55009100 | 55021897 | + | 1078  | 19.56563 | 0.083532 | -1.00244 | 0.306114 | -3.27472 | 0.001458 | 0.01315  | 1 |
| ENSG0000 | mucosal h | Inflamed | TRBV30    | TR_V_gene  | chr7  | 1.43E+08 | 1.43E+08 | - | 447   | 14.08831 | 0.112172 | -0.77329 | 0.236177 | -3.27419 | 0.00146  | 0.013167 | 1 |
| ENSG0000 | mucosal h | Inflamed | RP11-4O1: | sense_ove  | chr9  | 1.15E+08 | 1.15E+08 | - | 4836  | 188.2792 | 0        | 0.619014 | 0.189118 | 3.273161 | 0.001465 | 0.0132   | 1 |
| ENSG0000 | mucosal h | Inflamed | PGD       | protein_cc | chr1  | 10458649 | 10480201 | + | 3171  | 4354.248 | 0        | -0.36405 | 0.111227 | -3.27303 | 0.001466 | 0.0132   | 1 |
| ENSG0000 | mucosal h | Inflamed | FBXL14    | protein_cc | chr12 | 1675159  | 1703331  | - | 2287  | 1099.203 | 0        | 0.435889 | 0.133183 | 3.272849 | 0.001467 | 0.0132   | 1 |
| ENSG0000 | mucosal h | Inflamed | BATF3     | protein_cc | chr1  | 2.13E+08 | 2.13E+08 | - | 2713  | 129.3675 | 0        | -0.77197 | 0.235871 | -3.27283 | 0.001467 | 0.0132   | 1 |
| ENSG0000 | mucosal h | Inflamed | RP11-1055 | lincRNA    | chr17 | 79361930 | 79364056 | - | 1561  | 123.3413 | 0.009547 | 0.824347 | 0.251876 | 3.272831 | 0.001467 | 0.0132   | 1 |
| ENSG0000 | mucosal h | Inflamed | IGKV2D-2f | IG_V_gene  | chr2  | 90024732 | 90025512 | + | 390   | 9.305489 | 0.381862 | -1.0439  | 0.318968 | -3.27276 | 0.001467 | 0.0132   | 1 |
| ENSG0000 | mucosal h | Inflamed | CYB5R2    | protein_cc | chr11 | 7686331  | 7698453  | - | 8596  | 202.0525 | 0        | -0.51536 | 0.15748  | -3.27255 | 0.001468 | 0.013205 | 1 |
| ENSG0000 | mucosal h | Inflamed | PI4KAP1   | pseudoger  | chr22 | 20383524 | 20427835 | - | 4808  | 431.8067 | 0        | 0.759334 | 0.232069 | 3.272012 | 0.001471 | 0.013219 | 1 |
| ENSG0000 | mucosal h | Inflamed | TPBGL     | protein_cc | chr11 | 74951950 | 74954742 | + | 2793  | 35.87112 | 0.01432  | -0.833   | 0.254585 | -3.272   | 0.001471 | 0.013219 | 1 |
| ENSG0000 | mucosal h | Inflamed | HSPA12B   | protein_cc | chr20 | 3713314  | 3733758  | + | 3173  | 369.8592 | 0        | -0.776   | 0.237173 | -3.27186 | 0.001471 | 0.01322  | 1 |
| ENSG0000 | mucosal h | Inflamed | NFKB2     | protein_cc | chr10 | 1.04E+08 | 1.04E+08 | + | 4479  | 3174.819 | 0        | -0.58519 | 0.178864 | -3.27169 | 0.001472 | 0.013223 | 1 |
| ENSG0000 | mucosal h | Inflamed | DUSP2     | protein_cc | chr2  | 96808905 | 96811179 | - | 1932  | 296.358  | 0        | -0.82459 | 0.252075 | -3.27123 | 0.001474 | 0.013233 | 1 |
| ENSG0000 | mucosal h | Inflamed | PRCP      | protein_cc | chr11 | 82534544 | 82681626 | - | 6482  | 2453.675 | 0        | -0.54496 | 0.166591 | -3.27123 | 0.001474 | 0.013233 | 1 |
| ENSG0000 | mucosal h | Inflamed | PPP3CC    | protein_cc | chr8  | 22298332 | 22398652 | + | 2896  | 414.9737 | 0        | -0.45914 | 0.140361 | -3.27112 | 0.001475 | 0.013233 | 1 |
| ENSG0000 | mucosal h | Inflamed | RP11-166C | lincRNA    | chr7  | 66800963 | 66805011 | + | 489   | 13.03341 | 0.073986 | 0.69871  | 0.213614 | 3.270906 | 0.001476 | 0.013238 | 1 |
| ENSG0000 | mucosal h | Inflamed | MICA      | protein_cc | chr6  | 31371356 | 31383092 | + | 1386  | 662.7351 | 0        | 0.397807 | 0.121631 | 3.270617 | 0.001477 | 0.013243 | 1 |
| ENSG0000 | mucosal h | Inflamed | PLA2G2D   | protein_cc | chr1  | 20438432 | 20446050 | - | 2672  | 709.8329 | 0.002387 | -1.3556  | 0.414484 | -3.27057 | 0.001477 | 0.013243 | 1 |
| ENSG0000 | mucosal h | Inflamed | RLIMP2    | pseudoger  | chr1  | 1.14E+08 | 1.14E+08 | - | 1563  | 2.801909 | 0.52506  | -0.67872 | 0.207562 | -3.26994 | 0.00148  | 0.013265 | 1 |
| ENSG0000 | mucosal h | Inflamed | FMO4      | protein_cc | chr1  | 1.71E+08 | 1.71E+08 | + | 2517  | 199.7041 | 0        | 0.732399 | 0.224003 | 3.269594 | 0.001482 | 0.013274 | 1 |
| ENSG0000 | mucosal h | Inflamed | RP5-1031I | lincRNA    | chr10 | 7487520  | 7513904  | - | 557   | 3.868735 | 0.331742 | -0.7359  | 0.225079 | -3.26952 | 0.001482 | 0.013274 | 1 |
| ENSG0000 | mucosal h | Inflamed | MT-TY     | Mt_tRNA    | chrM  | 5826     | 5891     | - | 66    | 53.00955 | 0        | 0.646509 | 0.197748 | 3.269352 | 0.001483 | 0.013276 | 1 |
| ENSG0000 | mucosal h | Inflamed | LTA       | protein_cc | chr6  | 31539831 | 31542101 | + | 1737  | 100.5012 | 0.002387 | -0.82191 | 0.251414 | -3.26916 | 0.001484 | 0.01328  | 1 |
| ENSG0000 | mucosal h | Inflamed | C20orf195 | protein_cc | chr20 | 62184373 | 62188061 | + | 1201  | 8.427208 | 0.081146 | -0.62888 | 0.192412 | -3.2684  | 0.001488 | 0.013308 | 1 |
| ENSG0000 | mucosal h | Inflamed | LCK       | protein_cc | chr1  | 32716840 | 32751766 | + | 3337  | 916.7613 | 0        | -0.61143 | 0.187124 | -3.2675  | 0.001492 | 0.013342 | 1 |

|          |           |          |           |            |       |          |          |   |       |          |          |          |          |          |          |          |   |
|----------|-----------|----------|-----------|------------|-------|----------|----------|---|-------|----------|----------|----------|----------|----------|----------|----------|---|
| ENSG0000 | mucosal h | Inflamed | BCAT1     | protein_cc | chr12 | 24964295 | 25102393 | - | 10372 | 237.4129 | 0        | -0.932   | 0.285258 | -3.26722 | 0.001493 | 0.013346 | 1 |
| ENSG0000 | mucosal h | Inflamed | IFI6      | protein_cc | chr1  | 27992572 | 27998729 | - | 865   | 1111.764 | 0        | -0.67113 | 0.205417 | -3.26719 | 0.001493 | 0.013346 | 1 |
| ENSG0000 | mucosal h | Inflamed | PDE1B     | protein_cc | chr12 | 54943134 | 54973023 | + | 7457  | 251.7017 | 0        | -0.66733 | 0.20432  | -3.26613 | 0.001499 | 0.013386 | 1 |
| ENSG0000 | mucosal h | Inflamed | TGIF2     | protein_cc | chr20 | 35201891 | 35222353 | + | 3784  | 655.6158 | 0        | -0.55563 | 0.170156 | -3.26542 | 0.001502 | 0.013401 | 1 |
| ENSG0000 | mucosal h | Inflamed | GRIK1     | protein_cc | chr21 | 30909254 | 31312351 | - | 4248  | 2.348449 | 0.479714 | -0.54681 | 0.167457 | -3.26537 | 0.001502 | 0.013401 | 1 |
| ENSG0000 | mucosal h | Inflamed | RP11-28H1 | lincRNA    | chr15 | 80985557 | 80986048 | - | 492   | 6.078759 | 0.143198 | 0.609958 | 0.186798 | 3.265331 | 0.001502 | 0.013401 | 1 |
| ENSG0000 | mucosal h | Inflamed | AC008074  | antisense  | chr2  | 64622354 | 64680932 | - | 723   | 6.047733 | 0.102625 | 0.590491 | 0.180844 | 3.265197 | 0.001503 | 0.013401 | 1 |
| ENSG0000 | mucosal h | Inflamed | CD44      | protein_cc | chr11 | 35160417 | 35253949 | + | 10060 | 11319.93 | 0        | -0.661   | 0.20244  | -3.26514 | 0.001503 | 0.013401 | 1 |
| ENSG0000 | mucosal h | Inflamed | OGFR      | protein_cc | chr20 | 61436187 | 61445352 | + | 4702  | 3188.752 | 0        | -0.36704 | 0.112413 | -3.26513 | 0.001503 | 0.013401 | 1 |
| ENSG0000 | mucosal h | Inflamed | MFSD9     | protein_cc | chr2  | 1.03E+08 | 1.03E+08 | - | 4367  | 1212.535 | 0        | 0.425172 | 0.130235 | 3.264662 | 0.001506 | 0.013417 | 1 |
| ENSG0000 | mucosal h | Inflamed | ZNF620    | protein_cc | chr3  | 40547483 | 40560227 | + | 3457  | 99.35561 | 0.004773 | 0.580296 | 0.177789 | 3.263965 | 0.001509 | 0.013442 | 1 |
| ENSG0000 | mucosal h | Inflamed | CDK18     | protein_cc | chr1  | 2.05E+08 | 2.06E+08 | + | 7580  | 1351.103 | 0        | 0.481602 | 0.147563 | 3.263704 | 0.00151  | 0.013449 | 1 |
| ENSG0000 | mucosal h | Inflamed | RP11-678C | antisense  | chr19 | 21737442 | 21752039 | - | 447   | 3.367542 | 0.415274 | 0.588888 | 0.180453 | 3.26339  | 0.001512 | 0.013458 | 1 |
| ENSG0000 | mucosal h | Inflamed | FAM65C    | protein_cc | chr20 | 49202645 | 49308065 | - | 6009  | 875.1146 | 0        | -0.91243 | 0.279608 | -3.26323 | 0.001512 | 0.01346  | 1 |
| ENSG0000 | mucosal h | Inflamed | DNAJC12   | protein_cc | chr10 | 69556427 | 69597924 | - | 2117  | 223.7947 | 0        | 0.727741 | 0.223041 | 3.262818 | 0.001514 | 0.013473 | 1 |
| ENSG0000 | mucosal h | Inflamed | DDX39A    | protein_cc | chr19 | 14519631 | 14530192 | - | 3837  | 2061.847 | 0        | -0.26429 | 0.081012 | -3.26237 | 0.001517 | 0.013479 | 1 |
| ENSG0000 | mucosal h | Inflamed | AF165138  | protein_cc | chr21 | 15964251 | 16031142 | - | 1889  | 1.792363 | 0.649165 | -0.60579 | 0.18569  | -3.26237 | 0.001517 | 0.013479 | 1 |
| ENSG0000 | mucosal h | Inflamed | MT-ND3    | protein_cc | chrM  | 10059    | 10404    | + | 346   | 137287.9 | 0        | 0.572295 | 0.175424 | 3.262355 | 0.001517 | 0.013479 | 1 |
| ENSG0000 | mucosal h | Inflamed | AP001187  | pseudoger  | chr11 | 64657298 | 64657758 | - | 459   | 363.8449 | 0        | 1.034787 | 0.317224 | 3.262007 | 0.001518 | 0.013485 | 1 |
| ENSG0000 | mucosal h | Inflamed | RP11-733C | lincRNA    | chrX  | 5571462  | 5644346  | - | 976   | 7.742243 | 0.119332 | 0.570214 | 0.174805 | 3.262002 | 0.001518 | 0.013485 | 1 |
| ENSG0000 | mucosal h | Inflamed | AKIRIN2   | protein_cc | chr6  | 88384790 | 88411927 | - | 1999  | 1734.864 | 0        | -0.35609 | 0.109169 | -3.26185 | 0.001519 | 0.013487 | 1 |
| ENSG0000 | mucosal h | Inflamed | RP11-293F | antisense  | chr1  | 24367325 | 24413289 | + | 454   | 2.935561 | 0.441527 | 0.419432 | 0.128594 | 3.261688 | 0.00152  | 0.01349  | 1 |
| ENSG0000 | mucosal h | Inflamed | ACAD10    | protein_cc | chr12 | 1.12E+08 | 1.12E+08 | + | 8926  | 1679.146 | 0        | 0.420117 | 0.12882  | 3.261266 | 0.001522 | 0.013503 | 1 |
| ENSG0000 | mucosal h | Inflamed | RP11-575C | pseudoger  | chr12 | 1.01E+08 | 1.01E+08 | + | 1454  | 1.735084 | 0.544153 | 0.469167 | 0.143878 | 3.26086  | 0.001524 | 0.013516 | 1 |
| ENSG0000 | mucosal h | Inflamed | GS1-204I1 | lincRNA    | chr1  | 1.86E+08 | 1.86E+08 | + | 901   | 6.334129 | 0.243437 | 0.834972 | 0.256085 | 3.260528 | 0.001525 | 0.013526 | 1 |
| ENSG0000 | mucosal h | Inflamed | ZNF259P1  | pseudoger  | chr6  | 1.09E+08 | 1.09E+08 | - | 4928  | 2.155131 | 0.505967 | 0.52193  | 0.160081 | 3.260404 | 0.001526 | 0.013527 | 1 |
| ENSG0000 | mucosal h | Inflamed | GALNT14   | protein_cc | chr2  | 31133333 | 31378068 | - | 4567  | 49.821   | 0.047733 | -1.17154 | 0.359355 | -3.26014 | 0.001527 | 0.013532 | 1 |
| ENSG0000 | mucosal h | Inflamed | RP11-21C4 | antisense  | chr8  | 65486863 | 65494445 | - | 2875  | 13.85919 | 0.128878 | -0.89276 | 0.273848 | -3.26005 | 0.001528 | 0.013532 | 1 |
| ENSG0000 | mucosal h | Inflamed | SMAP2     | protein_cc | chr1  | 40810522 | 40888998 | + | 3436  | 4015.2   | 0        | -0.58464 | 0.179401 | -3.25886 | 0.001534 | 0.013579 | 1 |
| ENSG0000 | mucosal h | Inflamed | REPS2     | protein_cc | chrX  | 16964814 | 17171395 | + | 11361 | 833.9976 | 0        | 0.472244 | 0.144925 | 3.258543 | 0.001535 | 0.013588 | 1 |
| ENSG0000 | mucosal h | Inflamed | CNTNAP2   | protein_cc | chr7  | 1.46E+08 | 1.48E+08 | + | 10308 | 202.5704 | 0        | 0.815683 | 0.250342 | 3.258281 | 0.001536 | 0.013591 | 1 |
| ENSG0000 | mucosal h | Inflamed | VASH1     | protein_cc | chr14 | 77228532 | 77249354 | + | 6498  | 2023.391 | 0        | -0.56402 | 0.173104 | -3.25827 | 0.001536 | 0.013591 | 1 |
| ENSG0000 | mucosal h | Inflamed | ALDH6A1   | protein_cc | chr14 | 74523553 | 74551196 | - | 6680  | 1296.22  | 0        | 0.536986 | 0.164819 | 3.258027 | 0.001538 | 0.013597 | 1 |
| ENSG0000 | mucosal h | Inflamed | OBP2A     | protein_cc | chr9  | 1.38E+08 | 1.38E+08 | + | 1018  | 3.47494  | 0.687351 | -0.71905 | 0.220768 | -3.25705 | 0.001542 | 0.013635 | 1 |
| ENSG0000 | mucosal h | Inflamed | CDH5      | protein_cc | chr16 | 66400533 | 66438686 | + | 5961  | 1951.914 | 0        | -0.92073 | 0.282749 | -3.25635 | 0.001546 | 0.01366  | 1 |
| ENSG0000 | mucosal h | Inflamed | LINC00969 | lincRNA    | chr3  | 1.95E+08 | 1.95E+08 | + | 13406 | 1582.616 | 0        | 0.889543 | 0.273256 | 3.255348 | 0.001551 | 0.013699 | 1 |
| ENSG0000 | mucosal h | Inflamed | IKZF1     | protein_cc | chr7  | 50343720 | 50472799 | + | 9784  | 2100.32  | 0        | -0.73035 | 0.224441 | -3.25406 | 0.001557 | 0.013751 | 1 |
| ENSG0000 | mucosal h | Inflamed | RAP1GAP2  | protein_cc | chr17 | 2680350  | 2941033  | + | 7350  | 2821.783 | 0        | 0.514355 | 0.158093 | 3.253495 | 0.00156  | 0.013771 | 1 |
| ENSG0000 | mucosal h | Inflamed | ZDHHC3    | protein_cc | chr3  | 44956749 | 45017677 | - | 7609  | 7289.623 | 0        | 0.285578 | 0.087786 | 3.25312  | 0.001562 | 0.01378  | 1 |
| ENSG0000 | mucosal h | Inflamed | HLA-DPB2  | pseudoger  | chr6  | 33080228 | 33102442 | + | 2814  | 8.136038 | 0.121718 | -0.64547 | 0.198418 | -3.25309 | 0.001562 | 0.01378  | 1 |

|          |           |          |                           |                  |          |          |   |       |          |          |          |          |          |          |          |   |
|----------|-----------|----------|---------------------------|------------------|----------|----------|---|-------|----------|----------|----------|----------|----------|----------|----------|---|
| ENSG0000 | mucosal h | Inflamed | BHLHE40- <i>antisense</i> | chr3             | 4938493  | 5021646  | - | 2718  | 43.80191 | 0.004773 | -0.54465 | 0.167433 | -3.25294 | 0.001563 | 0.013782 | 1 |
| ENSG0000 | mucosal h | Inflamed | TRMT112                   | protein_cc chr11 | 64083932 | 64085556 | - | 1625  | 1296.881 | 0        | -0.42922 | 0.131957 | -3.25276 | 0.001564 | 0.013785 | 1 |
| ENSG0000 | mucosal h | Inflamed | ABCD2                     | protein_cc chr12 | 39943835 | 40013553 | - | 6238  | 42.31742 | 0.019093 | -0.8796  | 0.270447 | -3.25241 | 0.001565 | 0.013795 | 1 |
| ENSG0000 | mucosal h | Inflamed | RP11-327F                 | antisense chr16  | 50769624 | 50774627 | - | 1150  | 40.85442 | 0.00716  | -0.82919 | 0.254981 | -3.25197 | 0.001568 | 0.01381  | 1 |
| ENSG0000 | mucosal h | Inflamed | SAMD9L                    | protein_cc chr7  | 92759368 | 92777682 | - | 7135  | 1451.933 | 0        | -0.96014 | 0.295324 | -3.25116 | 0.001572 | 0.013841 | 1 |
| ENSG0000 | mucosal h | Inflamed | HHIPL1                    | protein_cc chr14 | 1E+08    | 1E+08    | + | 7836  | 206.4964 | 0.002387 | -0.77868 | 0.239582 | -3.25016 | 0.001577 | 0.01388  | 1 |
| ENSG0000 | mucosal h | Inflamed | EPN2-AS1                  | antisense chr17  | 19199909 | 19209574 | - | 1190  | 1.198091 | 0.72315  | -0.49153 | 0.151239 | -3.25005 | 0.001577 | 0.013881 | 1 |
| ENSG0000 | mucosal h | Inflamed | DNAJC11                   | protein_cc chr1  | 6694228  | 6761984  | - | 5147  | 3726.465 | 0        | 0.337164 | 0.103765 | 3.249299 | 0.001581 | 0.013907 | 1 |
| ENSG0000 | mucosal h | Inflamed | SNORA40                   | snoRNA chr1      | 1.51E+08 | 1.51E+08 | - | 121   | 3.53222  | 0.303103 | 0.539594 | 0.166072 | 3.24915  | 0.001582 | 0.013907 | 1 |
| ENSG0000 | mucosal h | Inflamed | NOXA1                     | protein_cc chr9  | 1.4E+08  | 1.4E+08  | + | 1678  | 918.5513 | 0        | 0.647854 | 0.199393 | 3.249127 | 0.001582 | 0.013907 | 1 |
| ENSG0000 | mucosal h | Inflamed | STAR                      | protein_cc chr8  | 38001167 | 38008783 | - | 3767  | 8.210024 | 0.27685  | -0.89072 | 0.274158 | -3.24894 | 0.001583 | 0.013911 | 1 |
| ENSG0000 | mucosal h | Inflamed | KCND3                     | protein_cc chr1  | 1.12E+08 | 1.13E+08 | - | 7863  | 929.599  | 0        | -1.0151  | 0.31246  | -3.24874 | 0.001584 | 0.013914 | 1 |
| ENSG0000 | mucosal h | Inflamed | KCNA2                     | protein_cc chr1  | 1.11E+08 | 1.11E+08 | - | 4013  | 67.358   | 0.02148  | -0.91551 | 0.281811 | -3.24866 | 0.001584 | 0.013914 | 1 |
| ENSG0000 | mucosal h | Inflamed | GAPDHP7                   | pseudoger chr6   | 1.66E+08 | 1.66E+08 | + | 1010  | 1.243437 | 0.708831 | -0.3792  | 0.116736 | -3.24834 | 0.001586 | 0.01392  | 1 |
| ENSG0000 | mucosal h | Inflamed | TTC23                     | protein_cc chr15 | 99676528 | 99791428 | - | 6145  | 491.8783 | 0        | 0.365005 | 0.112368 | 3.248312 | 0.001586 | 0.01392  | 1 |
| ENSG0000 | mucosal h | Inflamed | KCP                       | processed_chr7   | 1.29E+08 | 1.29E+08 | - | 8326  | 124.9356 | 0        | -0.78092 | 0.240433 | -3.24799 | 0.001587 | 0.01393  | 1 |
| ENSG0000 | mucosal h | Inflamed | IGHV1OR1                  | IG_V_pseu chr15  | 22466058 | 22466493 | - | 351   | 151.9737 | 0.064439 | -1.33278 | 0.410385 | -3.24764 | 0.001589 | 0.013939 | 1 |
| ENSG0000 | mucosal h | Inflamed | AL589743                  | lincRNA chr14    | 19650018 | 19718563 | + | 12134 | 11.14558 | 0.183771 | -0.76287 | 0.234907 | -3.24756 | 0.00159  | 0.013939 | 1 |
| ENSG0000 | mucosal h | Inflamed | AC011523                  | antisense chr19  | 51333786 | 51354345 | + | 392   | 16.55131 | 0.093079 | 0.875505 | 0.269655 | 3.246763 | 0.001594 | 0.01397  | 1 |
| ENSG0000 | mucosal h | Inflamed | RP11-750E                 | pseudoger chr17  | 51183095 | 51183719 | + | 625   | 521.2005 | 0        | 0.565036 | 0.17404  | 3.24659  | 0.001594 | 0.013972 | 1 |
| ENSG0000 | mucosal h | Inflamed | RP13-15E1                 | lincRNA chr1     | 3816936  | 3833789  | + | 4064  | 115.2649 | 0        | 0.624962 | 0.192503 | 3.246505 | 0.001595 | 0.013972 | 1 |
| ENSG0000 | mucosal h | Inflamed | TNFAIP8L1                 | protein_cc chr19 | 4639530  | 4655580  | + | 6667  | 966.3246 | 0        | -0.4392  | 0.135313 | -3.24584 | 0.001598 | 0.013997 | 1 |
| ENSG0000 | mucosal h | Inflamed | RP11-146                  | pseudoger chr9   | 19200333 | 19201044 | - | 712   | 1.23389  | 0.682578 | 0.390549 | 0.120329 | 3.24569  | 0.001599 | 0.013999 | 1 |
| ENSG0000 | mucosal h | Inflamed | HSD17B1P                  | pseudoger chr17  | 40698782 | 40700724 | + | 955   | 3.167064 | 0.329356 | 0.504272 | 0.155379 | 3.24543  | 0.0016   | 0.014001 | 1 |
| ENSG0000 | mucosal h | Inflamed | BID                       | protein_cc chr22 | 18216906 | 18257536 | - | 4418  | 962.8353 | 0        | -0.38379 | 0.11826  | -3.24534 | 0.001601 | 0.014001 | 1 |
| ENSG0000 | mucosal h | Inflamed | SLC6A6                    | protein_cc chr3  | 14444076 | 14530857 | + | 8262  | 2895.967 | 0        | -0.76543 | 0.235857 | -3.24532 | 0.001601 | 0.014001 | 1 |
| ENSG0000 | mucosal h | Inflamed | RP4-742C1                 | pseudoger chr22  | 39487591 | 39488860 | + | 640   | 3.842482 | 0.279236 | -0.57213 | 0.176302 | -3.24519 | 0.001602 | 0.014003 | 1 |
| ENSG0000 | mucosal h | Inflamed | ESR2                      | protein_cc chr14 | 64550950 | 64804830 | - | 9337  | 108.926  | 0.004773 | -0.72604 | 0.223742 | -3.24497 | 0.001603 | 0.014008 | 1 |
| ENSG0000 | mucosal h | Inflamed | ZNF552                    | protein_cc chr19 | 58315209 | 58326281 | - | 2989  | 431.778  | 0        | 0.475961 | 0.146685 | 3.244784 | 0.001604 | 0.014011 | 1 |
| ENSG0000 | mucosal h | Inflamed | ALDH5A1                   | protein_cc chr6  | 24495080 | 24537435 | + | 5525  | 944.6897 | 0        | 0.565145 | 0.174255 | 3.243207 | 0.001612 | 0.014077 | 1 |
| ENSG0000 | mucosal h | Inflamed | CEND1                     | protein_cc chr11 | 787104   | 790123   | - | 1649  | 14.26969 | 0.050119 | -0.81534 | 0.251409 | -3.24309 | 0.001612 | 0.014077 | 1 |
| ENSG0000 | mucosal h | Inflamed | SLC23A3                   | protein_cc chr2  | 2.2E+08  | 2.2E+08  | - | 6531  | 461.0382 | 0.002387 | 0.936693 | 0.288835 | 3.242999 | 0.001613 | 0.014077 | 1 |
| ENSG0000 | mucosal h | Inflamed | HIF1AN                    | protein_cc chr10 | 1.02E+08 | 1.02E+08 | + | 13950 | 2938.15  | 0        | 0.316418 | 0.097604 | 3.241856 | 0.001619 | 0.014117 | 1 |
| ENSG0000 | mucosal h | Inflamed | PTPN3                     | protein_cc chr9  | 1.12E+08 | 1.12E+08 | - | 10071 | 2146.093 | 0        | 0.648384 | 0.200004 | 3.241848 | 0.001619 | 0.014117 | 1 |
| ENSG0000 | mucosal h | Inflamed | RP11-239                  | antisense chr6   | 20212318 | 20317970 | + | 380   | 0.973747 | 0.74463  | 0.353875 | 0.109161 | 3.241782 | 0.001619 | 0.014117 | 1 |
| ENSG0000 | mucosal h | Inflamed | PPIL6                     | protein_cc chr6  | 1.1E+08  | 1.1E+08  | - | 4481  | 25.45107 | 0.00716  | 0.566606 | 0.174793 | 3.24158  | 0.00162  | 0.014121 | 1 |
| ENSG0000 | mucosal h | Inflamed | SYP                       | protein_cc chrX  | 49044269 | 49056718 | - | 5203  | 279.2315 | 0        | 0.648944 | 0.200204 | 3.241413 | 0.001621 | 0.014124 | 1 |
| ENSG0000 | mucosal h | Inflamed | IFI27L2                   | protein_cc chr14 | 94594116 | 94596590 | - | 1662  | 500.1575 | 0        | -0.55904 | 0.172494 | -3.24095 | 0.001623 | 0.014137 | 1 |
| ENSG0000 | mucosal h | Inflamed | LRG1                      | protein_cc chr19 | 4536421  | 4540486  | - | 3133  | 2379.876 | 0        | -0.55759 | 0.172048 | -3.24091 | 0.001623 | 0.014137 | 1 |
| ENSG0000 | mucosal h | Inflamed | CSGALNAC                  | protein_cc chr8  | 19261672 | 19615540 | - | 6580  | 369.1623 | 0        | -1.03618 | 0.319767 | -3.24043 | 0.001626 | 0.014154 | 1 |

|          |           |          |           |                  |          |          |   |       |          |          |          |          |          |          |          |   |
|----------|-----------|----------|-----------|------------------|----------|----------|---|-------|----------|----------|----------|----------|----------|----------|----------|---|
| ENSG0000 | mucosal h | Inflamed | EGFR      | protein_cc chr7  | 55086714 | 55324313 | + | 12961 | 3924.375 | 0        | 0.536348 | 0.165541 | 3.23997  | 0.001628 | 0.01417  | 1 |
| ENSG0000 | mucosal h | Inflamed | SUGT1P3   | pseudoger chr13  | 41482295 | 41495910 | - | 1331  | 5.152745 | 0.152745 | 0.533585 | 0.164708 | 3.239582 | 0.00163  | 0.014182 | 1 |
| ENSG0000 | mucosal h | Inflamed | ATOH1     | protein_cc chr4  | 94750042 | 94751221 | + | 1180  | 955.716  | 0.009547 | 1.201649 | 0.370947 | 3.239406 | 0.001631 | 0.014182 | 1 |
| ENSG0000 | mucosal h | Inflamed | CDKL2     | protein_cc chr4  | 76503215 | 76555900 | - | 3781  | 19.57518 | 0.052506 | 0.843368 | 0.260348 | 3.239384 | 0.001631 | 0.014182 | 1 |
| ENSG0000 | mucosal h | Inflamed | RP11-558F | antisense chr1   | 9732484  | 9747613  | - | 939   | 31.54654 | 0.002387 | -0.74497 | 0.229988 | -3.23917 | 0.001632 | 0.014185 | 1 |
| ENSG0000 | mucosal h | Inflamed | AC139100  | antisense chr18  | 77941563 | 77960875 | + | 2035  | 1.362768 | 0.642005 | 0.456098 | 0.140809 | 3.239125 | 0.001633 | 0.014185 | 1 |
| ENSG0000 | mucosal h | Inflamed | HSD11B2   | protein_cc chr16 | 67464555 | 67471456 | + | 2674  | 14563.62 | 0        | 1.176229 | 0.363278 | 3.237817 | 0.001639 | 0.014239 | 1 |
| ENSG0000 | mucosal h | Inflamed | MGAT4C    | protein_cc chr12 | 86372516 | 87232681 | - | 4703  | 3.403341 | 0.422434 | 0.626537 | 0.193548 | 3.237113 | 0.001643 | 0.014266 | 1 |
| ENSG0000 | mucosal h | Inflamed | GSE1      | protein_cc chr16 | 85645015 | 85709810 | + | 10173 | 4540.8   | 0        | 0.478129 | 0.147726 | 3.236586 | 0.001646 | 0.014285 | 1 |
| ENSG0000 | mucosal h | Inflamed | TNNI2     | protein_cc chr11 | 1860219  | 1862910  | + | 1080  | 24.76372 | 0.002387 | -0.56605 | 0.174922 | -3.236   | 0.001649 | 0.014304 | 1 |
| ENSG0000 | mucosal h | Inflamed | RP11-166C | lincRNA chr7     | 66798034 | 66799370 | + | 1337  | 13.54177 | 0.064439 | 0.75851  | 0.2344   | 3.235959 | 0.001649 | 0.014304 | 1 |
| ENSG0000 | mucosal h | Inflamed | CHMP3     | protein_cc chr2  | 86730554 | 86948245 | - | 7393  | 2758.845 | 0        | 0.498097 | 0.15395  | 3.235441 | 0.001652 | 0.014323 | 1 |
| ENSG0000 | mucosal h | Inflamed | UNC13B    | protein_cc chr9  | 35161999 | 35405335 | + | 6592  | 4936.277 | 0        | 0.550165 | 0.170072 | 3.234902 | 0.001655 | 0.014342 | 1 |
| ENSG0000 | mucosal h | Inflamed | ALPK2     | protein_cc chr18 | 56148479 | 56296189 | - | 9431  | 156.7566 | 0.01432  | -1.24817 | 0.385872 | -3.23468 | 0.001656 | 0.014346 | 1 |
| ENSG0000 | mucosal h | Inflamed | RP11-252E | antisense chr16  | 75142499 | 75144610 | - | 1666  | 34.46778 | 0.02864  | 0.839913 | 0.259668 | 3.234564 | 0.001656 | 0.014346 | 1 |
| ENSG0000 | mucosal h | Inflamed | RUSC1-AS1 | antisense chr1   | 1.55E+08 | 1.55E+08 | - | 3516  | 65.74702 | 0        | 0.644428 | 0.199237 | 3.234482 | 0.001657 | 0.014346 | 1 |
| ENSG0000 | mucosal h | Inflamed | GATA6     | protein_cc chr18 | 19749404 | 19782491 | + | 3945  | 2033.661 | 0        | 0.66259  | 0.204856 | 3.234414 | 0.001657 | 0.014346 | 1 |
| ENSG0000 | mucosal h | Inflamed | DSG3      | protein_cc chr18 | 29027758 | 29058665 | + | 5525  | 334.5537 | 0.064439 | -1.74816 | 0.540517 | -3.23425 | 0.001658 | 0.014348 | 1 |
| ENSG0000 | mucosal h | Inflamed | FEZ1      | protein_cc chr11 | 1.25E+08 | 1.25E+08 | - | 5932  | 250.5251 | 0        | -0.68369 | 0.211426 | -3.23373 | 0.001661 | 0.014366 | 1 |
| ENSG0000 | mucosal h | Inflamed | RP11-469F | antisense chr12  | 50345295 | 50356707 | - | 1574  | 3.353222 | 0.644391 | -0.87246 | 0.269805 | -3.23366 | 0.001661 | 0.014366 | 1 |
| ENSG0000 | mucosal h | Inflamed | RHBDL2    | protein_cc chr1  | 39351479 | 39407471 | - | 2914  | 752.3484 | 0        | 0.655982 | 0.202907 | 3.232916 | 0.001665 | 0.014395 | 1 |
| ENSG0000 | mucosal h | Inflamed | WI2-2373I | lincRNA chr7     | 331310   | 334388   | + | 530   | 1.042959 | 0.763723 | 0.365473 | 0.113057 | 3.232635 | 0.001667 | 0.014403 | 1 |
| ENSG0000 | mucosal h | Inflamed | RP11-376F | sense_intr chr17 | 41127706 | 41129292 | - | 1587  | 2.420048 | 0.434368 | 0.5093   | 0.157582 | 3.23198  | 0.00167  | 0.014418 | 1 |
| ENSG0000 | mucosal h | Inflamed | RP11-345F | antisense chr1   | 1549138  | 1551175  | - | 2038  | 229.7709 | 0        | 0.352448 | 0.109052 | 3.231922 | 0.00167  | 0.014418 | 1 |
| ENSG0000 | mucosal h | Inflamed | GSDMC     | protein_cc chr8  | 1.31E+08 | 1.31E+08 | - | 2934  | 24.41289 | 0.095465 | -1.01529 | 0.314148 | -3.23189 | 0.00167  | 0.014418 | 1 |
| ENSG0000 | mucosal h | Inflamed | FITM1     | protein_cc chr14 | 24600484 | 24602058 | + | 1355  | 21.04535 | 0.002387 | 0.426173 | 0.131865 | 3.231895 | 0.00167  | 0.014418 | 1 |
| ENSG0000 | mucosal h | Inflamed | HTR3C     | protein_cc chr3  | 1.84E+08 | 1.84E+08 | + | 1697  | 12.27446 | 0.307876 | 0.840062 | 0.259939 | 3.231763 | 0.001671 | 0.014419 | 1 |
| ENSG0000 | mucosal h | Inflamed | TRAV38-2I | TR_V_gene chr14  | 22748988 | 22749631 | + | 395   | 11.13365 | 0.064439 | -0.71328 | 0.220724 | -3.23156 | 0.001672 | 0.014423 | 1 |
| ENSG0000 | mucosal h | Inflamed | GREB1     | protein_cc chr2  | 11674242 | 11782914 | + | 12320 | 129.4057 | 0.01432  | -0.86367 | 0.267292 | -3.23118 | 0.001674 | 0.014436 | 1 |
| ENSG0000 | mucosal h | Inflamed | JUN       | protein_cc chr1  | 59246465 | 59249785 | - | 3321  | 5560.384 | 0        | 0.553637 | 0.171352 | 3.231    | 0.001675 | 0.014439 | 1 |
| ENSG0000 | mucosal h | Inflamed | RTEL1-TNF | protein_cc chr20 | 62290653 | 62330037 | + | 8738  | 317.0644 | 0        | -0.57702 | 0.17862  | -3.23045 | 0.001678 | 0.01446  | 1 |
| ENSG0000 | mucosal h | Inflamed | ABCA10    | protein_cc chr17 | 67143355 | 67240987 | - | 8405  | 116.3484 | 0        | 0.931557 | 0.2884   | 3.230088 | 0.00168  | 0.014472 | 1 |
| ENSG0000 | mucosal h | Inflamed | HELZ2     | protein_cc chr20 | 62189439 | 62205592 | - | 12066 | 3951.983 | 0        | -0.56692 | 0.175522 | -3.22989 | 0.001681 | 0.014476 | 1 |
| ENSG0000 | mucosal h | Inflamed | C1QA      | protein_cc chr1  | 22962999 | 22966101 | + | 1272  | 6434.263 | 0        | -0.55129 | 0.1707   | -3.22956 | 0.001683 | 0.014486 | 1 |
| ENSG0000 | mucosal h | Inflamed | GPHN      | protein_cc chr14 | 66974125 | 67648520 | + | 6007  | 680.6754 | 0        | 0.478908 | 0.148295 | 3.229422 | 0.001684 | 0.014488 | 1 |
| ENSG0000 | mucosal h | Inflamed | FAM167A   | protein_cc chr8  | 11278972 | 11332224 | - | 5033  | 340.0263 | 0        | -0.85407 | 0.264473 | -3.22931 | 0.001684 | 0.014488 | 1 |
| ENSG0000 | mucosal h | Inflamed | RP11-396C | antisense chr1   | 2.26E+08 | 2.26E+08 | - | 490   | 6.317422 | 0.164678 | 0.639988 | 0.1982   | 3.228999 | 0.001686 | 0.014498 | 1 |
| ENSG0000 | mucosal h | Inflamed | C10orf128 | protein_cc chr10 | 50362773 | 50396630 | - | 4120  | 544.9666 | 0        | -0.5128  | 0.15882  | -3.22883 | 0.001687 | 0.014501 | 1 |
| ENSG0000 | mucosal h | Inflamed | MEOX2     | protein_cc chr7  | 15650837 | 15726437 | - | 2500  | 55.81146 | 0.026253 | -1.04204 | 0.322763 | -3.22852 | 0.001688 | 0.01451  | 1 |
| ENSG0000 | mucosal h | Inflamed | BMP6      | protein_cc chr6  | 7727030  | 7881655  | + | 2780  | 460.2816 | 0        | -0.88505 | 0.274181 | -3.22799 | 0.001691 | 0.014526 | 1 |



|          |         |    |          |           |            |       |          |          |   |       |          |          |          |          |          |          |          |   |
|----------|---------|----|----------|-----------|------------|-------|----------|----------|---|-------|----------|----------|----------|----------|----------|----------|----------|---|
| ENSG0000 | mucosal | hi | Inflamed | TMEM220   | protein_cc | chr17 | 10602332 | 10633633 | - | 3508  | 429.2673 | 0        | 0.628094 | 0.194579 | 3.227969 | 0.001691 | 0.014526 | 1 |
| ENSG0000 | mucosal | hi | Inflamed | B3GALT1   | protein_cc | chr2  | 1.69E+08 | 1.69E+08 | + | 5353  | 359.3294 | 0.009547 | 1.410567 | 0.437009 | 3.227772 | 0.001692 | 0.01453  | 1 |
| ENSG0000 | mucosal | hi | Inflamed | TAS2R5    | protein_cc | chr7  | 1.41E+08 | 1.41E+08 | + | 1150  | 35.179   | 0.073986 | 1.042623 | 0.323091 | 3.227025 | 0.001696 | 0.014551 | 1 |
| ENSG0000 | mucosal | hi | Inflamed | UNC5CL    | protein_cc | chr6  | 40994772 | 41006928 | - | 2986  | 578.6301 | 0        | -0.86235 | 0.267227 | -3.22702 | 0.001696 | 0.014551 | 1 |
| ENSG0000 | mucosal | hi | Inflamed | S100Z     | protein_cc | chr5  | 76145826 | 76217475 | + | 1951  | 8.797136 | 0.064439 | -0.68232 | 0.21145  | -3.22686 | 0.001697 | 0.014551 | 1 |
| ENSG0000 | mucosal | hi | Inflamed | AC005262  | antisense  | chr19 | 3118663  | 3119302  | - | 452   | 8.343675 | 0.245823 | -0.88812 | 0.275233 | -3.22681 | 0.001698 | 0.014551 | 1 |
| ENSG0000 | mucosal | hi | Inflamed | TMEM184   | protein_cc | chr22 | 38615298 | 38669040 | - | 5014  | 4251.387 | 0        | -0.35993 | 0.111545 | -3.22681 | 0.001698 | 0.014551 | 1 |
| ENSG0000 | mucosal | hi | Inflamed | CR1L      | protein_cc | chr1  | 2.08E+08 | 2.08E+08 | + | 2768  | 6.534606 | 0.231504 | -0.77204 | 0.239272 | -3.2266  | 0.001699 | 0.014552 | 1 |
| ENSG0000 | mucosal | hi | Inflamed | SREBF2    | protein_cc | chr22 | 42229109 | 42303312 | + | 7531  | 14531.6  | 0        | 0.430584 | 0.13345  | 3.226566 | 0.001699 | 0.014552 | 1 |
| ENSG0000 | mucosal | hi | Inflamed | LGALS17A  | pseudoger  | chr19 | 40170014 | 40177013 | + | 2773  | 6.823389 | 0.346062 | -0.85518 | 0.26505  | -3.22648 | 0.001699 | 0.014552 | 1 |
| ENSG0000 | mucosal | hi | Inflamed | CLCNKB    | protein_cc | chr1  | 16370272 | 16383803 | + | 2898  | 5.804296 | 0.348449 | 0.732687 | 0.227126 | 3.22591  | 0.001702 | 0.014573 | 1 |
| ENSG0000 | mucosal | hi | Inflamed | DCPS      | protein_cc | chr11 | 1.26E+08 | 1.26E+08 | + | 3352  | 717.6062 | 0        | -0.34217 | 0.106086 | -3.22543 | 0.001705 | 0.01459  | 1 |
| ENSG0000 | mucosal | hi | Inflamed | RP11-430E | lincRNA    | chr15 | 52472290 | 52498071 | + | 2096  | 7.799523 | 0.119332 | -0.6304  | 0.195474 | -3.22497 | 0.001707 | 0.014607 | 1 |
| ENSG0000 | mucosal | hi | Inflamed | TBX4      | protein_cc | chr17 | 59529765 | 59562471 | + | 3996  | 1.792363 | 0.582339 | 0.567713 | 0.176056 | 3.22461  | 0.001709 | 0.014619 | 1 |
| ENSG0000 | mucosal | hi | Inflamed | COG2      | protein_cc | chr1  | 2.31E+08 | 2.31E+08 | + | 11086 | 1370.494 | 0        | 0.454023 | 0.140811 | 3.224333 | 0.001711 | 0.014627 | 1 |
| ENSG0000 | mucosal | hi | Inflamed | SEMG1     | protein_cc | chr20 | 43835638 | 43838413 | + | 1662  | 20.32936 | 0.221957 | -1.1157  | 0.346037 | -3.22423 | 0.001711 | 0.014627 | 1 |
| ENSG0000 | mucosal | hi | Inflamed | SDHAP1    | pseudoger  | chr3  | 1.96E+08 | 1.96E+08 | - | 3353  | 734.2458 | 0        | 0.673769 | 0.209028 | 3.223338 | 0.001716 | 0.014663 | 1 |
| ENSG0000 | mucosal | hi | Inflamed | MT-TR     | Mt_tRNA    | chrM  | 10405    | 10469    | + | 65    | 2.852029 | 0.498807 | 0.567798 | 0.176185 | 3.222734 | 0.001719 | 0.014683 | 1 |
| ENSG0000 | mucosal | hi | Inflamed | OR51E1    | protein_cc | chr11 | 4664650  | 4676718  | + | 3614  | 55.79475 | 0.004773 | -0.74434 | 0.230966 | -3.22272 | 0.00172  | 0.014683 | 1 |
| ENSG0000 | mucosal | hi | Inflamed | ANXA2P1   | pseudoger  | chr4  | 1.54E+08 | 1.54E+08 | - | 926   | 12.08353 | 0.019093 | -0.56835 | 0.176389 | -3.22214 | 0.001723 | 0.014704 | 1 |
| ENSG0000 | mucosal | hi | Inflamed | CTC-510F1 | 3prime_ov  | chr19 | 11411453 | 11435117 | - | 685   | 8.334129 | 0.288783 | -0.976   | 0.302911 | -3.22205 | 0.001723 | 0.014704 | 1 |
| ENSG0000 | mucosal | hi | Inflamed | MUC1      | protein_cc | chr1  | 1.55E+08 | 1.55E+08 | - | 2401  | 11707.15 | 0        | -0.72309 | 0.224482 | -3.22117 | 0.001728 | 0.01474  | 1 |
| ENSG0000 | mucosal | hi | Inflamed | AC006129  | lincRNA    | chr19 | 42037566 | 42038534 | + | 969   | 6.625298 | 0.205251 | -0.70495 | 0.218873 | -3.2208  | 0.00173  | 0.014753 | 1 |
| ENSG0000 | mucosal | hi | Inflamed | PYY       | protein_cc | chr17 | 42030106 | 42081837 | - | 1181  | 3002.47  | 0        | 1.647364 | 0.511559 | 3.220281 | 0.001733 | 0.014772 | 1 |
| ENSG0000 | mucosal | hi | Inflamed | FGF18     | protein_cc | chr5  | 1.71E+08 | 1.71E+08 | + | 1986  | 10.65155 | 0.071599 | -0.69174 | 0.214848 | -3.21969 | 0.001736 | 0.014795 | 1 |
| ENSG0000 | mucosal | hi | Inflamed | SYNE2     | protein_cc | chr14 | 64319683 | 64693165 | + | 31405 | 4259.601 | 0        | 0.586129 | 0.182052 | 3.219572 | 0.001737 | 0.014795 | 1 |
| ENSG0000 | mucosal | hi | Inflamed | NFATC1    | protein_cc | chr18 | 77155856 | 77289325 | + | 7008  | 659.4296 | 0        | -0.78441 | 0.243657 | -3.2193  | 0.001738 | 0.014803 | 1 |
| ENSG0000 | mucosal | hi | Inflamed | SNPH      | protein_cc | chr20 | 1246960  | 1289972  | + | 5572  | 654.3604 | 0        | -0.85771 | 0.266444 | -3.21908 | 0.001739 | 0.014809 | 1 |
| ENSG0000 | mucosal | hi | Inflamed | WIPF1     | protein_cc | chr2  | 1.75E+08 | 1.76E+08 | - | 9121  | 3762.487 | 0        | -0.64717 | 0.201055 | -3.21886 | 0.001741 | 0.014814 | 1 |
| ENSG0000 | mucosal | hi | Inflamed | LPIN3     | protein_cc | chr20 | 39969560 | 39989222 | + | 4565  | 2221.599 | 0        | 0.630506 | 0.195891 | 3.218658 | 0.001742 | 0.014819 | 1 |
| ENSG0000 | mucosal | hi | Inflamed | RP4-605O  | :processed | chr12 | 50505980 | 50559203 | + | 919   | 15.61575 | 0.009547 | 0.496137 | 0.154158 | 3.218369 | 0.001743 | 0.014825 | 1 |
| ENSG0000 | mucosal | hi | Inflamed | TMTC4     | protein_cc | chr13 | 1.01E+08 | 1.01E+08 | - | 6272  | 668.2434 | 0        | 0.488924 | 0.151919 | 3.218322 | 0.001744 | 0.014825 | 1 |
| ENSG0000 | mucosal | hi | Inflamed | SPAG6     | protein_cc | chr10 | 22634399 | 22743153 | + | 4006  | 1.921241 | 0.544153 | -0.54459 | 0.169251 | -3.21765 | 0.001747 | 0.014851 | 1 |
| ENSG0000 | mucosal | hi | Inflamed | FAM47DP   | pseudoger  | chrX  | 37400330 | 37404515 | - | 3290  | 1.551313 | 0.684964 | 0.397464 | 0.123545 | 3.217171 | 0.00175  | 0.014865 | 1 |
| ENSG0000 | mucosal | hi | Inflamed | CTGLF11P  | pseudoger  | chr10 | 47708307 | 47730235 | + | 2439  | 7.195704 | 0.372315 | 0.693098 | 0.215438 | 3.217155 | 0.00175  | 0.014865 | 1 |
| ENSG0000 | mucosal | hi | Inflamed | ZSCAN16   | protein_cc | chr6  | 28092338 | 28097860 | + | 1328  | 167.0979 | 0        | 0.46792  | 0.145453 | 3.216993 | 0.001751 | 0.014868 | 1 |
| ENSG0000 | mucosal | hi | Inflamed | CCDC64B   | protein_cc | chr16 | 3077683  | 3086927  | - | 4690  | 3662.446 | 0        | 0.793764 | 0.246778 | 3.216514 | 0.001754 | 0.014886 | 1 |
| ENSG0000 | mucosal | hi | Inflamed | SLC6A20   | protein_cc | chr3  | 45796942 | 45838027 | - | 6651  | 962.716  | 0        | -1.35586 | 0.421552 | -3.21634 | 0.001754 | 0.014886 | 1 |
| ENSG0000 | mucosal | hi | Inflamed | RP11-484I | antisense  | chr11 | 43350298 | 43380846 | - | 787   | 2.73031  | 0.424821 | 0.52078  | 0.161919 | 3.216303 | 0.001755 | 0.014886 | 1 |
| ENSG0000 | mucosal | hi | Inflamed | ZNF467    | protein_cc | chr7  | 1.49E+08 | 1.49E+08 | - | 2734  | 437.8329 | 0        | -0.7109  | 0.22105  | -3.216   | 0.001756 | 0.014895 | 1 |

|          |           |          |           |            |       |          |          |   |       |          |          |          |          |          |          |          |   |
|----------|-----------|----------|-----------|------------|-------|----------|----------|---|-------|----------|----------|----------|----------|----------|----------|----------|---|
| ENSG0000 | mucosal h | Inflamed | RP11-102C | antisense  | chr3  | 10000401 | 10004223 | + | 3823  | 43.16706 | 0.040573 | 0.895107 | 0.278338 | 3.215902 | 0.001757 | 0.014895 | 1 |
| ENSG0000 | mucosal h | Inflamed | THBD      | protein_cc | chr20 | 23026270 | 23030378 | - | 4109  | 1355.866 | 0        | -0.80021 | 0.248843 | -3.21575 | 0.001758 | 0.014898 | 1 |
| ENSG0000 | mucosal h | Inflamed | RIMBP3B   | protein_cc | chr22 | 21737663 | 21743446 | + | 5784  | 4.74463  | 0.178998 | -0.60662 | 0.188706 | -3.21462 | 0.001764 | 0.014946 | 1 |
| ENSG0000 | mucosal h | Inflamed | CCL25     | protein_cc | chr19 | 8117651  | 8127534  | + | 984   | 168.1193 | 0.176611 | -1.30399 | 0.405714 | -3.21406 | 0.001767 | 0.014961 | 1 |
| ENSG0000 | mucosal h | Inflamed | ATF5      | protein_cc | chr19 | 50431959 | 50437192 | + | 2954  | 1825.372 | 0        | -0.3735  | 0.116208 | -3.21405 | 0.001767 | 0.014961 | 1 |
| ENSG0000 | mucosal h | Inflamed | ITGB7     | protein_cc | chr12 | 53585102 | 53601091 | - | 4481  | 1965.119 | 0        | -0.52128 | 0.162192 | -3.21399 | 0.001768 | 0.014961 | 1 |
| ENSG0000 | mucosal h | Inflamed | ELMO1     | protein_cc | chr7  | 36893961 | 37488852 | - | 9767  | 1060.496 | 0        | -0.66286 | 0.20626  | -3.21368 | 0.001769 | 0.014969 | 1 |
| ENSG0000 | mucosal h | Inflamed | TNC       | protein_cc | chr9  | 1.18E+08 | 1.18E+08 | - | 8687  | 13712.79 | 0        | -1.21846 | 0.379155 | -3.21362 | 0.00177  | 0.014969 | 1 |
| ENSG0000 | mucosal h | Inflamed | PHACTR1   | protein_cc | chr6  | 12717893 | 13288645 | + | 8489  | 182.8091 | 0.002387 | -0.71646 | 0.222957 | -3.21345 | 0.001771 | 0.014972 | 1 |
| ENSG0000 | mucosal h | Inflamed | RP11-875C | antisense  | chr8  | 22928890 | 22932001 | - | 881   | 6.861575 | 0.183771 | -0.72074 | 0.224316 | -3.21307 | 0.001773 | 0.014983 | 1 |
| ENSG0000 | mucosal h | Inflamed | SEC14L5   | protein_cc | chr16 | 5008318  | 5069159  | + | 6477  | 74.39857 | 0.01432  | 1.126387 | 0.35057  | 3.213015 | 0.001773 | 0.014983 | 1 |
| ENSG0000 | mucosal h | Inflamed | LINC00094 | antisense  | chr9  | 1.37E+08 | 1.37E+08 | + | 5994  | 510.3461 | 0        | -0.39834 | 0.123995 | -3.21255 | 0.001776 | 0.014997 | 1 |
| ENSG0000 | mucosal h | Inflamed | EBF1      | protein_cc | chr5  | 1.58E+08 | 1.59E+08 | - | 6161  | 179.0095 | 0.00716  | -0.83057 | 0.258543 | -3.21252 | 0.001776 | 0.014997 | 1 |
| ENSG0000 | mucosal h | Inflamed | KDR       | protein_cc | chr4  | 55944644 | 55991756 | - | 6259  | 1277.241 | 0        | -0.8694  | 0.270642 | -3.21237 | 0.001777 | 0.014999 | 1 |
| ENSG0000 | mucosal h | Inflamed | SLC12A5   | protein_cc | chr20 | 44650356 | 44688784 | + | 7520  | 25.78043 | 0        | -0.58942 | 0.183508 | -3.21195 | 0.001779 | 0.015011 | 1 |
| ENSG0000 | mucosal h | Inflamed | MIOX      | protein_cc | chr22 | 50925213 | 50929077 | + | 1796  | 5.892601 | 0.221957 | -0.68    | 0.21171  | -3.21191 | 0.001779 | 0.015011 | 1 |
| ENSG0000 | mucosal h | Inflamed | AKR1B1    | protein_cc | chr7  | 1.34E+08 | 1.34E+08 | - | 3660  | 1581.53  | 0        | -0.66707 | 0.207703 | -3.21164 | 0.001781 | 0.015017 | 1 |
| ENSG0000 | mucosal h | Inflamed | B3GALT5   | protein_cc | chr21 | 40928369 | 41045064 | + | 14191 | 10385.09 | 0        | 1.259776 | 0.392259 | 3.211589 | 0.001781 | 0.015017 | 1 |
| ENSG0000 | mucosal h | Inflamed | TRBV5-4   | TR_V_gene  | chr7  | 1.42E+08 | 1.42E+08 | - | 544   | 13.48687 | 0.066826 | -0.67979 | 0.211682 | -3.21136 | 0.001782 | 0.015023 | 1 |
| ENSG0000 | mucosal h | Inflamed | PRR7      | protein_cc | chr5  | 1.77E+08 | 1.77E+08 | + | 1768  | 99.03341 | 0        | -0.57067 | 0.177716 | -3.21113 | 0.001784 | 0.015029 | 1 |
| ENSG0000 | mucosal h | Inflamed | PALMD     | protein_cc | chr1  | 1E+08    | 1E+08    | + | 8244  | 182.9475 | 0.002387 | -0.79467 | 0.24754  | -3.21026 | 0.001788 | 0.015065 | 1 |
| ENSG0000 | mucosal h | Inflamed | FOXC1     | protein_cc | chr6  | 1610681  | 1614127  | + | 3447  | 80.36993 | 0.01432  | -0.71473 | 0.222658 | -3.20997 | 0.00179  | 0.015074 | 1 |
| ENSG0000 | mucosal h | Inflamed | CASD1     | protein_cc | chr7  | 94138531 | 94186331 | + | 5271  | 1079.745 | 0.002387 | 0.712136 | 0.221861 | 3.209829 | 0.001791 | 0.015076 | 1 |
| ENSG0000 | mucosal h | Inflamed | RP11-353M | lincRNA    | chr17 | 77797251 | 77801503 | + | 1788  | 3.042959 | 0.408115 | 0.503073 | 0.156737 | 3.209656 | 0.001792 | 0.015079 | 1 |
| ENSG0000 | mucosal h | Inflamed | IGHV3OR1  | IG_V_gene  | chr16 | 32077386 | 32077679 | + | 294   | 6.121718 | 0.403341 | -0.88201 | 0.274866 | -3.20888 | 0.001796 | 0.015111 | 1 |
| ENSG0000 | mucosal h | Inflamed | SOX17     | protein_cc | chr8  | 55370495 | 55373448 | + | 2342  | 115.1289 | 0.00716  | -0.89975 | 0.280471 | -3.20799 | 0.001801 | 0.015149 | 1 |
| ENSG0000 | mucosal h | Inflamed | IGLC5     | IG_C_pseu  | chr22 | 23257805 | 23258097 | + | 293   | 3.863962 | 0.348449 | -0.64451 | 0.200916 | -3.20787 | 0.001802 | 0.01515  | 1 |
| ENSG0000 | mucosal h | Inflamed | BCL3      | protein_cc | chr19 | 45250962 | 45263301 | + | 3242  | 4723.692 | 0        | -0.47915 | 0.149375 | -3.20772 | 0.001803 | 0.015152 | 1 |
| ENSG0000 | mucosal h | Inflamed | SLC5A11   | protein_cc | chr16 | 24857162 | 24922949 | + | 3415  | 38.35322 | 0.152745 | 1.126152 | 0.351161 | 3.206938 | 0.001807 | 0.015184 | 1 |
| ENSG0000 | mucosal h | Inflamed | SAP30     | protein_cc | chr4  | 1.74E+08 | 1.74E+08 | + | 1320  | 224.3675 | 0        | -0.36547 | 0.113972 | -3.20661 | 0.001809 | 0.015191 | 1 |
| ENSG0000 | mucosal h | Inflamed | GP2       | protein_cc | chr16 | 20320894 | 20339130 | - | 4048  | 193.1575 | 0.009547 | 1.229303 | 0.38337  | 3.20657  | 0.001809 | 0.015191 | 1 |
| ENSG0000 | mucosal h | Inflamed | D87007.1  | miRNA      | chr22 | 23077063 | 23077157 | + | 95    | 260.2816 | 0.004773 | -1.18344 | 0.369077 | -3.20649 | 0.00181  | 0.015191 | 1 |
| ENSG0000 | mucosal h | Inflamed | FKBP4     | protein_cc | chr12 | 2904119  | 2914576  | + | 3958  | 4711.131 | 0        | 0.329733 | 0.102836 | 3.206381 | 0.00181  | 0.015192 | 1 |
| ENSG0000 | mucosal h | Inflamed | DNAJA4    | protein_cc | chr15 | 78556428 | 78574538 | + | 6591  | 2328.413 | 0        | 0.463182 | 0.144488 | 3.205665 | 0.001814 | 0.015221 | 1 |
| ENSG0000 | mucosal h | Inflamed | AC061992  | lincRNA    | chr17 | 76311810 | 76343879 | + | 1145  | 10.04296 | 0.095465 | -0.77409 | 0.241492 | -3.20544 | 0.001816 | 0.015226 | 1 |
| ENSG0000 | mucosal h | Inflamed | INPP5D    | protein_cc | chr2  | 2.34E+08 | 2.34E+08 | + | 6998  | 3076.222 | 0        | -0.55348 | 0.172676 | -3.20533 | 0.001816 | 0.015226 | 1 |
| ENSG0000 | mucosal h | Inflamed | FZD2      | protein_cc | chr17 | 42634925 | 42636907 | + | 1983  | 187.3389 | 0        | -0.6417  | 0.200202 | -3.20525 | 0.001817 | 0.015226 | 1 |
| ENSG0000 | mucosal h | Inflamed | AL928768  | lincRNA    | chr14 | 1.06E+08 | 1.06E+08 | - | 359   | 313.9618 | 0        | -0.8384  | 0.26158  | -3.20512 | 0.001818 | 0.015228 | 1 |
| ENSG0000 | mucosal h | Inflamed | TMEM61    | protein_cc | chr1  | 55446465 | 55457966 | + | 1097  | 242.8353 | 0.004773 | 0.837994 | 0.261463 | 3.205015 | 0.001818 | 0.015228 | 1 |
| ENSG0000 | mucosal h | Inflamed | MTMR8     | protein_cc | chrX  | 63444187 | 63615333 | - | 3813  | 63.94749 | 0.004773 | 0.637002 | 0.198787 | 3.204445 | 0.001821 | 0.01525  | 1 |

|          |           |          |           |            |       |          |          |   |       |          |          |          |          |          |          |          |   |
|----------|-----------|----------|-----------|------------|-------|----------|----------|---|-------|----------|----------|----------|----------|----------|----------|----------|---|
| ENSG0000 | mucosal h | Inflamed | SUCLG2P2  | pseudoger  | chr12 | 94942017 | 94943312 | + | 1296  | 11.65632 | 0.050119 | 0.589884 | 0.184105 | 3.204069 | 0.001824 | 0.015256 | 1 |
| ENSG0000 | mucosal h | Inflamed | DNM3      | protein_cc | chr1  | 1.72E+08 | 1.72E+08 | + | 11346 | 77.27446 | 0        | -0.5377  | 0.167822 | -3.20401 | 0.001824 | 0.015256 | 1 |
| ENSG0000 | mucosal h | Inflamed | PRRX1     | protein_cc | chr1  | 1.71E+08 | 1.71E+08 | + | 8246  | 617.4105 | 0.002387 | -1.23179 | 0.384455 | -3.20399 | 0.001824 | 0.015256 | 1 |
| ENSG0000 | mucosal h | Inflamed | CSRP2     | protein_cc | chr12 | 77252495 | 77272840 | - | 5873  | 306.6563 | 0        | -0.79679 | 0.248692 | -3.20391 | 0.001825 | 0.015256 | 1 |
| ENSG0000 | mucosal h | Inflamed | AC079325  | pseudoger  | chr17 | 72556855 | 72563482 | - | 501   | 9.143198 | 0.350835 | -1.01778 | 0.317753 | -3.20307 | 0.001829 | 0.015292 | 1 |
| ENSG0000 | mucosal h | Inflamed | SPP1      | protein_cc | chr4  | 88896819 | 88904562 | + | 2288  | 551.2959 | 0.004773 | -1.28414 | 0.400937 | -3.20285 | 0.001831 | 0.015298 | 1 |
| ENSG0000 | mucosal h | Inflamed | TMCC3     | protein_cc | chr12 | 94960900 | 95044338 | - | 6515  | 2564.26  | 0        | 0.710532 | 0.221874 | 3.202413 | 0.001833 | 0.015314 | 1 |
| ENSG0000 | mucosal h | Inflamed | CD37      | protein_cc | chr19 | 49838428 | 49846592 | + | 4161  | 1854.384 | 0        | -0.84613 | 0.264224 | -3.2023  | 0.001834 | 0.015314 | 1 |
| ENSG0000 | mucosal h | Inflamed | ABC7-4238 | pseudoger  | chr12 | 73725    | 91218    | + | 1817  | 540.4368 | 0        | 0.469995 | 0.146783 | 3.201979 | 0.001836 | 0.015325 | 1 |
| ENSG0000 | mucosal h | Inflamed | U91328.15 | lincRNA    | chr6  | 25992890 | 26002003 | + | 4130  | 115.3437 | 0.004773 | 0.466373 | 0.145671 | 3.20155  | 0.001838 | 0.015341 | 1 |
| ENSG0000 | mucosal h | Inflamed | CCNB1IP1  | protein_cc | chr14 | 20779527 | 20801471 | - | 3680  | 514.7399 | 0        | 0.439702 | 0.137387 | 3.200468 | 0.001844 | 0.015388 | 1 |
| ENSG0000 | mucosal h | Inflamed | AUH       | protein_cc | chr9  | 93976097 | 94124195 | - | 2673  | 463.463  | 0        | 0.434755 | 0.135861 | 3.200007 | 0.001847 | 0.015406 | 1 |
| ENSG0000 | mucosal h | Inflamed | SLC29A1   | protein_cc | chr6  | 44187242 | 44201888 | + | 3433  | 1124.833 | 0        | -0.45368 | 0.141802 | -3.19938 | 0.001851 | 0.015431 | 1 |
| ENSG0000 | mucosal h | Inflamed | MGLL      | protein_cc | chr3  | 1.27E+08 | 1.28E+08 | - | 10056 | 19090.93 | 0        | 0.449543 | 0.14054  | 3.198692 | 0.001855 | 0.015457 | 1 |
| ENSG0000 | mucosal h | Inflamed | SH3BGRL2  | protein_cc | chr6  | 80341000 | 80413372 | + | 4649  | 4317.396 | 0        | 0.859882 | 0.268828 | 3.198637 | 0.001855 | 0.015457 | 1 |
| ENSG0000 | mucosal h | Inflamed | AC130710  | lincRNA    | chr2  | 16190549 | 16225923 | + | 1330  | 0.868735 | 0.787589 | 0.382729 | 0.11966  | 3.198473 | 0.001856 | 0.01546  | 1 |
| ENSG0000 | mucosal h | Inflamed | WDR88     | protein_cc | chr19 | 33622996 | 33666701 | + | 1841  | 1.224344 | 0.673031 | 0.375379 | 0.117386 | 3.197818 | 0.00186  | 0.015487 | 1 |
| ENSG0000 | mucosal h | Inflamed | AHCYL2    | protein_cc | chr7  | 1.29E+08 | 1.29E+08 | + | 6899  | 11921.99 | 0        | 0.809899 | 0.253286 | 3.197566 | 0.001861 | 0.015495 | 1 |
| ENSG0000 | mucosal h | Inflamed | FANK1     | protein_cc | chr10 | 1.28E+08 | 1.28E+08 | + | 4178  | 101.4749 | 0        | 0.578445 | 0.18091  | 3.197423 | 0.001862 | 0.015497 | 1 |
| ENSG0000 | mucosal h | Inflamed | RP11-1421 | pseudoger  | chr11 | 1.21E+08 | 1.21E+08 | - | 772   | 0.897375 | 0.782816 | 0.358995 | 0.112304 | 3.196642 | 0.001867 | 0.01553  | 1 |
| ENSG0000 | mucosal h | Inflamed | CBX4      | protein_cc | chr17 | 77806955 | 77813228 | - | 2880  | 1033.885 | 0        | -0.45102 | 0.141114 | -3.19615 | 0.00187  | 0.015549 | 1 |
| ENSG0000 | mucosal h | Inflamed | RP5-850O  | lincRNA    | chr1  | 50902700 | 50902978 | - | 279   | 3.77327  | 0.260143 | 0.560057 | 0.175243 | 3.19589  | 0.001871 | 0.015554 | 1 |
| ENSG0000 | mucosal h | Inflamed | NPY1R     | protein_cc | chr4  | 1.64E+08 | 1.64E+08 | - | 4180  | 113.1074 | 0.00716  | 1.051145 | 0.328911 | 3.195838 | 0.001871 | 0.015554 | 1 |
| ENSG0000 | mucosal h | Inflamed | DUSP16    | protein_cc | chr12 | 12628829 | 12715317 | - | 4039  | 1970.573 | 0        | 0.551351 | 0.172547 | 3.195376 | 0.001874 | 0.015572 | 1 |
| ENSG0000 | mucosal h | Inflamed | NEURL1B   | protein_cc | chr5  | 1.72E+08 | 1.72E+08 | + | 6424  | 4909.153 | 0        | 0.701964 | 0.219693 | 3.195202 | 0.001875 | 0.015575 | 1 |
| ENSG0000 | mucosal h | Inflamed | RP11-190A | antisense  | chr1  | 1.6E+08  | 1.6E+08  | + | 732   | 26.18138 | 0.073986 | 0.891783 | 0.279111 | 3.195077 | 0.001876 | 0.015577 | 1 |
| ENSG0000 | mucosal h | Inflamed | GRHL2     | protein_cc | chr8  | 1.03E+08 | 1.03E+08 | + | 6060  | 1355.026 | 0.004773 | 0.938451 | 0.293773 | 3.19448  | 0.001879 | 0.015593 | 1 |
| ENSG0000 | mucosal h | Inflamed | COX10     | protein_cc | chr17 | 13972813 | 14111994 | + | 3172  | 989.5752 | 0        | 0.289402 | 0.0906   | 3.194292 | 0.00188  | 0.015593 | 1 |
| ENSG0000 | mucosal h | Inflamed | PROCR     | protein_cc | chr20 | 33759876 | 33765165 | + | 1348  | 732.5943 | 0        | -0.56921 | 0.178198 | -3.19428 | 0.001881 | 0.015593 | 1 |
| ENSG0000 | mucosal h | Inflamed | ITGA2B    | protein_cc | chr17 | 42449548 | 42466873 | - | 5551  | 38.83532 | 0.026253 | -0.8378  | 0.262283 | -3.19425 | 0.001881 | 0.015593 | 1 |
| ENSG0000 | mucosal h | Inflamed | PCSK1N    | protein_cc | chrX  | 48689504 | 48694035 | - | 1347  | 262.7924 | 0.002387 | 1.029722 | 0.322368 | 3.194247 | 0.001881 | 0.015593 | 1 |
| ENSG0000 | mucosal h | Inflamed | BCL2L14   | protein_cc | chr12 | 12202778 | 12364018 | + | 5112  | 841.8449 | 0        | 0.773932 | 0.242314 | 3.193926 | 0.001883 | 0.015603 | 1 |
| ENSG0000 | mucosal h | Inflamed | NOS1AP    | protein_cc | chr1  | 1.62E+08 | 1.62E+08 | + | 8449  | 229.0668 | 0.00716  | 0.60767  | 0.190266 | 3.193798 | 0.001883 | 0.015605 | 1 |
| ENSG0000 | mucosal h | Inflamed | UNGP1     | pseudoger  | chr16 | 51311763 | 51313023 | + | 1261  | 0.885442 | 0.770883 | 0.370221 | 0.115926 | 3.193597 | 0.001885 | 0.01561  | 1 |
| ENSG0000 | mucosal h | Inflamed | EXOC3L2   | protein_cc | chr19 | 45715879 | 45737469 | - | 1725  | 269.5084 | 0.002387 | -0.76258 | 0.23882  | -3.19313 | 0.001887 | 0.015628 | 1 |
| ENSG0000 | mucosal h | Inflamed | TCF15     | protein_cc | chr20 | 584441   | 591042   | - | 1555  | 7.553699 | 0.102625 | -0.70641 | 0.221349 | -3.19138 | 0.001898 | 0.015709 | 1 |
| ENSG0000 | mucosal h | Inflamed | NCKAP5    | protein_cc | chr2  | 1.33E+08 | 1.34E+08 | - | 9545  | 162.7709 | 0.01432  | 0.623371 | 0.195374 | 3.190662 | 0.001902 | 0.015737 | 1 |
| ENSG0000 | mucosal h | Inflamed | RP11-597C | pseudoger  | chr4  | 1.59E+08 | 1.59E+08 | + | 3616  | 26.97852 | 0.064439 | 0.965493 | 0.302605 | 3.190608 | 0.001902 | 0.015737 | 1 |
| ENSG0000 | mucosal h | Inflamed | GRK5      | protein_cc | chr10 | 1.21E+08 | 1.21E+08 | + | 2949  | 1715.845 | 0        | -0.51732 | 0.162201 | -3.18939 | 0.00191  | 0.015792 | 1 |
| ENSG0000 | mucosal h | Inflamed | GBP4      | protein_cc | chr1  | 89646831 | 89664615 | - | 6127  | 2131.115 | 0        | -0.86637 | 0.27165  | -3.18928 | 0.00191  | 0.015792 | 1 |

|          |           |          |           |            |       |          |          |   |       |          |          |          |          |          |          |          |   |
|----------|-----------|----------|-----------|------------|-------|----------|----------|---|-------|----------|----------|----------|----------|----------|----------|----------|---|
| ENSG0000 | mucosal h | Inflamed | IGHV3-72  | IG_V_gene  | chr14 | 1.07E+08 | 1.07E+08 | - | 437   | 3844.148 | 0        | -1.24725 | 0.39112  | -3.18891 | 0.001912 | 0.015806 | 1 |
| ENSG0000 | mucosal h | Inflamed | SUCLG1    | protein_cc | chr2  | 84650647 | 84687169 | - | 4286  | 2937.94  | 0        | 0.444853 | 0.13951  | 3.188679 | 0.001914 | 0.015812 | 1 |
| ENSG0000 | mucosal h | Inflamed | CTC-459F4 | lincRNA    | chr19 | 28248092 | 28251757 | - | 3666  | 19.23389 | 0.073986 | 0.825976 | 0.259057 | 3.18839  | 0.001916 | 0.015819 | 1 |
| ENSG0000 | mucosal h | Inflamed | CACNA2D4  | protein_cc | chr12 | 1901123  | 2028002  | - | 7639  | 229.463  | 0        | 0.309661 | 0.097123 | 3.188341 | 0.001916 | 0.015819 | 1 |
| ENSG0000 | mucosal h | Inflamed | CMTM3     | protein_cc | chr16 | 66637777 | 66647795 | + | 3163  | 967.5203 | 0        | -0.51658 | 0.162075 | -3.1873  | 0.001922 | 0.015866 | 1 |
| ENSG0000 | mucosal h | Inflamed | INSL3     | protein_cc | chr19 | 17927321 | 17932383 | - | 923   | 14.05967 | 0.093079 | -0.78334 | 0.245801 | -3.18689 | 0.001925 | 0.015872 | 1 |
| ENSG0000 | mucosal h | Inflamed | PLXND1    | protein_cc | chr3  | 1.29E+08 | 1.29E+08 | - | 9738  | 4803.098 | 0        | -0.68736 | 0.215684 | -3.18689 | 0.001925 | 0.015872 | 1 |
| ENSG0000 | mucosal h | Inflamed | TEX2      | protein_cc | chr17 | 62224587 | 62340661 | - | 9094  | 1866.888 | 0        | 0.463388 | 0.145405 | 3.186874 | 0.001925 | 0.015872 | 1 |
| ENSG0000 | mucosal h | Inflamed | CCL22     | protein_cc | chr16 | 57392684 | 57400102 | + | 2929  | 548.4033 | 0        | -1.09803 | 0.344717 | -3.18532 | 0.001934 | 0.015944 | 1 |
| ENSG0000 | mucosal h | Inflamed | BCAS1     | protein_cc | chr20 | 52553316 | 52687304 | - | 9024  | 6182.148 | 0        | 0.951811 | 0.298869 | 3.18471  | 0.001938 | 0.01597  | 1 |
| ENSG0000 | mucosal h | Inflamed | MPV17L    | protein_cc | chr16 | 15489611 | 15507125 | + | 6009  | 287.5251 | 0        | 0.705622 | 0.221589 | 3.184373 | 0.00194  | 0.015981 | 1 |
| ENSG0000 | mucosal h | Inflamed | AC073072  | antisense  | chr7  | 22765014 | 22767239 | - | 1364  | 6.054893 | 0.357995 | -0.80711 | 0.253466 | -3.1843  | 0.00194  | 0.015981 | 1 |
| ENSG0000 | mucosal h | Inflamed | OVOL2     | protein_cc | chr20 | 17937623 | 18039832 | - | 2175  | 446.5776 | 0.004773 | 0.703879 | 0.221061 | 3.184095 | 0.001942 | 0.015986 | 1 |
| ENSG0000 | mucosal h | Inflamed | RP11-680C | pseudoger  | chr16 | 15082116 | 15084017 | - | 1902  | 14.22196 | 0.01432  | 0.468608 | 0.147199 | 3.183495 | 0.001945 | 0.015994 | 1 |
| ENSG0000 | mucosal h | Inflamed | IGHV5-78  | IG_V_pseu  | chr14 | 1.07E+08 | 1.07E+08 | - | 295   | 13.96181 | 0.143198 | -0.91156 | 0.286339 | -3.18349 | 0.001945 | 0.015994 | 1 |
| ENSG0000 | mucosal h | Inflamed | LA16c-380 | sense_ove  | chr16 | 3053432  | 3055102  | - | 608   | 3.116945 | 0.427208 | 0.501147 | 0.157423 | 3.183441 | 0.001945 | 0.015994 | 1 |
| ENSG0000 | mucosal h | Inflamed | C10orf10  | protein_cc | chr10 | 45466429 | 45474258 | - | 2979  | 1131.1   | 0        | -0.69259 | 0.217568 | -3.18333 | 0.001946 | 0.015994 | 1 |
| ENSG0000 | mucosal h | Inflamed | RP11-102M | lincRNA    | chr4  | 1.42E+08 | 1.42E+08 | + | 1394  | 16.53222 | 0.016706 | -0.66905 | 0.210173 | -3.18333 | 0.001946 | 0.015994 | 1 |
| ENSG0000 | mucosal h | Inflamed | CPHL1P    | pseudoger  | chr3  | 1.49E+08 | 1.49E+08 | - | 3934  | 5.842482 | 0.245823 | 0.800811 | 0.251567 | 3.183285 | 0.001946 | 0.015994 | 1 |
| ENSG0000 | mucosal h | Inflamed | MT1DP     | pseudoger  | chr16 | 56677617 | 56678698 | + | 191   | 4.50358  | 0.420048 | 0.568731 | 0.178665 | 3.183233 | 0.001947 | 0.015994 | 1 |
| ENSG0000 | mucosal h | Inflamed | B4GALT4   | protein_cc | chr3  | 1.19E+08 | 1.19E+08 | - | 7145  | 1668.623 | 0        | 0.582984 | 0.183171 | 3.182725 | 0.00195  | 0.016012 | 1 |
| ENSG0000 | mucosal h | Inflamed | CCM2L     | protein_cc | chr20 | 30598245 | 30619984 | + | 2596  | 202.3126 | 0        | -0.61956 | 0.194668 | -3.18267 | 0.00195  | 0.016012 | 1 |
| ENSG0000 | mucosal h | Inflamed | CTD-2124f | pseudoger  | chr5  | 37286551 | 37287079 | - | 529   | 11.60382 | 0.031026 | 0.546313 | 0.171663 | 3.182467 | 0.001951 | 0.016014 | 1 |
| ENSG0000 | mucosal h | Inflamed | AAED1     | protein_cc | chr9  | 99401859 | 99417585 | - | 3084  | 261.5418 | 0        | -0.51066 | 0.160461 | -3.18243 | 0.001952 | 0.016014 | 1 |
| ENSG0000 | mucosal h | Inflamed | SCIN      | protein_cc | chr7  | 12610203 | 12693228 | + | 5048  | 1371.9   | 0.002387 | 1.039387 | 0.326628 | 3.18217  | 0.001953 | 0.016021 | 1 |
| ENSG0000 | mucosal h | Inflamed | IGJ       | protein_cc | chr4  | 71521258 | 71547534 | - | 1680  | 85492.92 | 0        | -0.95956 | 0.301559 | -3.18199 | 0.001954 | 0.016021 | 1 |
| ENSG0000 | mucosal h | Inflamed | DNAH6     | protein_cc | chr2  | 84743579 | 85046713 | + | 13514 | 24.80907 | 0.02148  | 0.751171 | 0.236076 | 3.181909 | 0.001955 | 0.016021 | 1 |
| ENSG0000 | mucosal h | Inflamed | EBI3      | protein_cc | chr19 | 4229495  | 4237528  | + | 1284  | 261.4988 | 0        | -0.70834 | 0.222618 | -3.18185 | 0.001955 | 0.016021 | 1 |
| ENSG0000 | mucosal h | Inflamed | ZFP2      | protein_cc | chr5  | 1.78E+08 | 1.78E+08 | + | 2763  | 27.27208 | 0.01432  | 0.677834 | 0.213036 | 3.181787 | 0.001956 | 0.016021 | 1 |
| ENSG0000 | mucosal h | Inflamed | ZSCAN16-1 | antisense  | chr6  | 28089573 | 28105071 | - | 2163  | 72.73031 | 0        | -0.48554 | 0.152609 | -3.18157 | 0.001957 | 0.016027 | 1 |
| ENSG0000 | mucosal h | Inflamed | MARS      | protein_cc | chr12 | 57869228 | 57911352 | + | 7028  | 4072.272 | 0        | -0.35075 | 0.110258 | -3.18115 | 0.001959 | 0.016043 | 1 |
| ENSG0000 | mucosal h | Inflamed | MRPL28    | protein_cc | chr16 | 417384   | 420527   | - | 2404  | 1281.945 | 0        | -0.27406 | 0.086155 | -3.18098 | 0.001961 | 0.016047 | 1 |
| ENSG0000 | mucosal h | Inflamed | RP1L1     | protein_cc | chr8  | 10463859 | 10569697 | - | 8881  | 7.042959 | 0.143198 | -0.61585 | 0.193616 | -3.1808  | 0.001962 | 0.016051 | 1 |
| ENSG0000 | mucosal h | Inflamed | EFNA5     | protein_cc | chr5  | 1.07E+08 | 1.07E+08 | - | 5698  | 218.7494 | 0        | 0.673341 | 0.211742 | 3.180009 | 0.001966 | 0.016086 | 1 |
| ENSG0000 | mucosal h | Inflamed | DZANK1    | protein_cc | chr20 | 18364011 | 18447925 | - | 6637  | 90.25776 | 0.004773 | 0.518381 | 0.163026 | 3.179753 | 0.001968 | 0.016093 | 1 |
| ENSG0000 | mucosal h | Inflamed | HLA-F     | protein_cc | chr6  | 29690552 | 29706305 | + | 4685  | 7730.537 | 0        | -0.37528 | 0.118041 | -3.17921 | 0.001971 | 0.016116 | 1 |
| ENSG0000 | mucosal h | Inflamed | HSD17B13  | protein_cc | chr4  | 88224941 | 88244058 | - | 2397  | 14.64678 | 0.071599 | 0.77528  | 0.243907 | 3.178587 | 0.001975 | 0.016142 | 1 |
| ENSG0000 | mucosal h | Inflamed | FAM189A2  | protein_cc | chr9  | 71939488 | 72007371 | + | 4015  | 156.2983 | 0.002387 | 0.554746 | 0.17455  | 3.178146 | 0.001978 | 0.016157 | 1 |
| ENSG0000 | mucosal h | Inflamed | SPATA2    | protein_cc | chr20 | 48519928 | 48532080 | - | 4305  | 1618.573 | 0        | 0.385224 | 0.121215 | 3.178031 | 0.001979 | 0.016157 | 1 |
| ENSG0000 | mucosal h | Inflamed | CTB-175P5 | lincRNA    | chr19 | 23582035 | 23598877 | - | 3296  | 227.9881 | 0.011933 | 1.041742 | 0.327798 | 3.178002 | 0.001979 | 0.016157 | 1 |

|          |           |          |           |            |       |          |          |   |       |          |          |          |          |          |          |          |   |
|----------|-----------|----------|-----------|------------|-------|----------|----------|---|-------|----------|----------|----------|----------|----------|----------|----------|---|
| ENSG0000 | mucosal h | Inflamed | IHH       | protein_cc | chr2  | 2.2E+08  | 2.2E+08  | - | 2023  | 2534.931 | 0        | 1.0436   | 0.328434 | 3.177501 | 0.001982 | 0.016177 | 1 |
| ENSG0000 | mucosal h | Inflamed | RP11-65J2 | lincRNA    | chr16 | 14396145 | 14420210 | + | 741   | 7.214797 | 0.102625 | -0.62414 | 0.196435 | -3.17733 | 0.001983 | 0.016181 | 1 |
| ENSG0000 | mucosal h | Inflamed | ISX       | protein_cc | chr22 | 35462129 | 35483380 | + | 3384  | 2751.062 | 0.004773 | 1.449323 | 0.456163 | 3.177203 | 0.001984 | 0.016182 | 1 |
| ENSG0000 | mucosal h | Inflamed | ANKRD62   | protein_cc | chr18 | 12093852 | 12129748 | + | 4812  | 1.312649 | 0.696897 | 0.409927 | 0.129034 | 3.176906 | 0.001986 | 0.016192 | 1 |
| ENSG0000 | mucosal h | Inflamed | CTC-497E2 | lincRNA    | chr11 | 13022637 | 13030706 | - | 670   | 1.630072 | 0.622912 | 0.529549 | 0.166702 | 3.176616 | 0.001987 | 0.016202 | 1 |
| ENSG0000 | mucosal h | Inflamed | COL22A1   | protein_cc | chr8  | 1.4E+08  | 1.4E+08  | - | 7830  | 60.25776 | 0.047733 | -1.08933 | 0.343156 | -3.17443 | 0.002001 | 0.016308 | 1 |
| ENSG0000 | mucosal h | Inflamed | TENM4     | protein_cc | chr11 | 78363876 | 79151992 | - | 16330 | 295.6205 | 0.00716  | -1.03785 | 0.326965 | -3.1742  | 0.002003 | 0.016314 | 1 |
| ENSG0000 | mucosal h | Inflamed | RP11-345M | lincRNA    | chr16 | 79710005 | 79841819 | + | 2409  | 5.353222 | 0.307876 | -0.70804 | 0.223108 | -3.17351 | 0.002007 | 0.016344 | 1 |
| ENSG0000 | mucosal h | Inflamed | AC007386  | lincRNA    | chr2  | 65128974 | 65132271 | - | 2928  | 13.47494 | 0.042959 | -0.73377 | 0.231248 | -3.17308 | 0.00201  | 0.016361 | 1 |
| ENSG0000 | mucosal h | Inflamed | SLC35A1   | protein_cc | chr6  | 88180341 | 88222054 | + | 1994  | 474.389  | 0        | 0.56044  | 0.176634 | 3.172893 | 0.002011 | 0.016361 | 1 |
| ENSG0000 | mucosal h | Inflamed | ATF4P3    | pseudoger  | chr17 | 74221832 | 74222887 | - | 1056  | 21.53461 | 0        | -0.43942 | 0.138494 | -3.17285 | 0.002011 | 0.016361 | 1 |
| ENSG0000 | mucosal h | Inflamed | ACACB     | protein_cc | chr12 | 1.1E+08  | 1.1E+08  | + | 14159 | 2160.32  | 0        | 0.506176 | 0.159537 | 3.172788 | 0.002011 | 0.016361 | 1 |
| ENSG0000 | mucosal h | Inflamed | C16orf86  | protein_cc | chr16 | 67700719 | 67702661 | + | 1789  | 70.77088 | 0.002387 | -0.61926 | 0.195189 | -3.17263 | 0.002012 | 0.016364 | 1 |
| ENSG0000 | mucosal h | Inflamed | EVA1B     | protein_cc | chr1  | 36787632 | 36789755 | - | 1211  | 446.8138 | 0        | -0.77471 | 0.244194 | -3.17252 | 0.002013 | 0.016365 | 1 |
| ENSG0000 | mucosal h | Inflamed | CTD-2555A | antisense  | chr16 | 89179583 | 89181687 | - | 2105  | 7.152745 | 0.162291 | -0.66348 | 0.209139 | -3.17241 | 0.002014 | 0.016365 | 1 |
| ENSG0000 | mucosal h | Inflamed | ELOVL2    | protein_cc | chr6  | 10980992 | 11044547 | - | 3997  | 28.23628 | 0.200477 | -1.2305  | 0.387911 | -3.17212 | 0.002016 | 0.016375 | 1 |
| ENSG0000 | mucosal h | Inflamed | TINF2     | protein_cc | chr14 | 24708849 | 24711880 | - | 2712  | 1855.43  | 0        | -0.24055 | 0.075835 | -3.17198 | 0.002016 | 0.016377 | 1 |
| ENSG0000 | mucosal h | Inflamed | KLF3      | protein_cc | chr4  | 38665817 | 38702663 | + | 6297  | 5527.158 | 0        | 0.578726 | 0.182456 | 3.171867 | 0.002017 | 0.016378 | 1 |
| ENSG0000 | mucosal h | Inflamed | PGLYRP1   | protein_cc | chr19 | 46522411 | 46526323 | - | 720   | 27.10024 | 0.131265 | -1.25107 | 0.394451 | -3.17167 | 0.002018 | 0.01638  | 1 |
| ENSG0000 | mucosal h | Inflamed | SH3PXD2B  | protein_cc | chr5  | 1.72E+08 | 1.72E+08 | - | 7977  | 3104.971 | 0        | -0.61995 | 0.195466 | -3.17164 | 0.002019 | 0.01638  | 1 |
| ENSG0000 | mucosal h | Inflamed | PCTP      | protein_cc | chr17 | 53828340 | 53920191 | + | 5880  | 965.7947 | 0        | 0.321423 | 0.101351 | 3.171394 | 0.00202  | 0.016383 | 1 |
| ENSG0000 | mucosal h | Inflamed | MSTO1     | protein_cc | chr1  | 1.56E+08 | 1.56E+08 | + | 5359  | 489.2697 | 0        | -0.36123 | 0.113903 | -3.17136 | 0.00202  | 0.016383 | 1 |
| ENSG0000 | mucosal h | Inflamed | MAP7D1    | protein_cc | chr1  | 36621180 | 36646450 | + | 5271  | 3890.9   | 0        | -0.44093 | 0.139061 | -3.17073 | 0.002024 | 0.016411 | 1 |
| ENSG0000 | mucosal h | Inflamed | MAP7      | protein_cc | chr6  | 1.37E+08 | 1.37E+08 | - | 4664  | 2977.604 | 0        | 0.643923 | 0.203107 | 3.170362 | 0.002027 | 0.016423 | 1 |
| ENSG0000 | mucosal h | Inflamed | RP11-263k | lincRNA    | chr12 | 82906456 | 82909596 | + | 3141  | 0.906921 | 0.787589 | 0.393855 | 0.124233 | 3.170297 | 0.002027 | 0.016423 | 1 |
| ENSG0000 | mucosal h | Inflamed | 03-Mar    | protein_cc | chr5  | 1.26E+08 | 1.26E+08 | - | 5179  | 794.8663 | 0        | 0.395845 | 0.124906 | 3.169154 | 0.002034 | 0.016476 | 1 |
| ENSG0000 | mucosal h | Inflamed | LIAS      | protein_cc | chr4  | 39460620 | 39479273 | + | 2464  | 319.0764 | 0        | 0.495463 | 0.156403 | 3.167869 | 0.002042 | 0.016537 | 1 |
| ENSG0000 | mucosal h | Inflamed | GBA2      | protein_cc | chr9  | 35736863 | 35749983 | - | 5079  | 6340.193 | 0        | 0.356099 | 0.112426 | 3.167406 | 0.002045 | 0.016553 | 1 |
| ENSG0000 | mucosal h | Inflamed | BCL6      | protein_cc | chr3  | 1.87E+08 | 1.87E+08 | - | 5938  | 1540.241 | 0        | -0.84352 | 0.266323 | -3.16728 | 0.002046 | 0.016553 | 1 |
| ENSG0000 | mucosal h | Inflamed | PPAPDC1A  | protein_cc | chr10 | 1.22E+08 | 1.22E+08 | + | 2534  | 10.11456 | 0.176611 | -0.89923 | 0.283914 | -3.16727 | 0.002046 | 0.016553 | 1 |
| ENSG0000 | mucosal h | Inflamed | CDKN2A    | protein_cc | chr9  | 21967751 | 21995300 | - | 4400  | 95.06444 | 0        | -0.69417 | 0.219178 | -3.16714 | 0.002047 | 0.016555 | 1 |
| ENSG0000 | mucosal h | Inflamed | C17orf97  | protein_cc | chr17 | 260118   | 273510   | + | 2505  | 256.0883 | 0        | 0.436413 | 0.137814 | 3.16669  | 0.00205  | 0.016573 | 1 |
| ENSG0000 | mucosal h | Inflamed | CCDC88B   | protein_cc | chr11 | 64107695 | 64125006 | + | 8331  | 3875.611 | 0        | -0.59223 | 0.187039 | -3.16632 | 0.002052 | 0.016587 | 1 |
| ENSG0000 | mucosal h | Inflamed | KANK4     | protein_cc | chr1  | 62702651 | 62785085 | - | 5980  | 70.80191 | 0.0358   | 1.189553 | 0.375714 | 3.166117 | 0.002054 | 0.016592 | 1 |
| ENSG0000 | mucosal h | Inflamed | SNX10     | protein_cc | chr7  | 26331541 | 26413949 | + | 3421  | 297.9141 | 0        | -0.85051 | 0.268656 | -3.1658  | 0.002056 | 0.016603 | 1 |
| ENSG0000 | mucosal h | Inflamed | LINC0048E | lincRNA    | chr3  | 1.09E+08 | 1.09E+08 | + | 2520  | 3.050119 | 0.565632 | 0.553887 | 0.174987 | 3.165309 | 0.002059 | 0.016624 | 1 |
| ENSG0000 | mucosal h | Inflamed | RNU6-652  | snRNA      | chr4  | 56751761 | 56751867 | + | 107   | 1.935561 | 0.541766 | 0.543587 | 0.171749 | 3.165017 | 0.002061 | 0.016634 | 1 |
| ENSG0000 | mucosal h | Inflamed | LBX2-AS1  | antisense  | chr2  | 74729722 | 74731805 | + | 2084  | 443.9284 | 0        | 0.340448 | 0.107575 | 3.164765 | 0.002062 | 0.016642 | 1 |
| ENSG0000 | mucosal h | Inflamed | VIM       | protein_cc | chr10 | 17270258 | 17279592 | + | 4965  | 27974.55 | 0        | -0.63639 | 0.201117 | -3.16427 | 0.002066 | 0.016663 | 1 |
| ENSG0000 | mucosal h | Inflamed | LZTS1     | protein_cc | chr8  | 20103676 | 20161474 | - | 5706  | 217.5179 | 0.01432  | -0.94528 | 0.298753 | -3.1641  | 0.002067 | 0.016666 | 1 |

|          |           |          |           |            |       |          |          |   |       |          |          |          |          |          |          |          |   |
|----------|-----------|----------|-----------|------------|-------|----------|----------|---|-------|----------|----------|----------|----------|----------|----------|----------|---|
| ENSG0000 | mucosal h | Inflamed | MT1JP     | pseudoger  | chr16 | 56669651 | 56670998 | + | 1001  | 1.51074  | 0.704057 | 0.486488 | 0.153785 | 3.16342  | 0.002071 | 0.016692 | 1 |
| ENSG0000 | mucosal h | Inflamed | CTD-2196E | lincRNA    | chr16 | 23683453 | 23686820 | + | 372   | 44.35561 | 0.02148  | 0.630441 | 0.199292 | 3.163403 | 0.002071 | 0.016692 | 1 |
| ENSG0000 | mucosal h | Inflamed | ABCA8     | protein_cc | chr17 | 66863433 | 66951533 | - | 11288 | 614.3747 | 0.004773 | 1.110962 | 0.351285 | 3.162571 | 0.002077 | 0.01673  | 1 |
| ENSG0000 | mucosal h | Inflamed | SIDT1     | protein_cc | chr3  | 1.13E+08 | 1.13E+08 | + | 8072  | 1481.117 | 0        | 0.554081 | 0.175225 | 3.162117 | 0.002079 | 0.016749 | 1 |
| ENSG0000 | mucosal h | Inflamed | CTD-2587E | lincRNA    | chr19 | 55728028 | 55732984 | + | 1577  | 4.954654 | 0.24105  | 0.616289 | 0.194921 | 3.16174  | 0.002082 | 0.016764 | 1 |
| ENSG0000 | mucosal h | Inflamed | SEMA6A    | protein_cc | chr5  | 1.16E+08 | 1.16E+08 | - | 10956 | 3187.513 | 0        | 0.807725 | 0.255487 | 3.161512 | 0.002083 | 0.01677  | 1 |
| ENSG0000 | mucosal h | Inflamed | RP11-707C | lincRNA    | chr11 | 73639578 | 73641417 | + | 383   | 3.011933 | 0.312649 | 0.491276 | 0.155403 | 3.161314 | 0.002085 | 0.016775 | 1 |
| ENSG0000 | mucosal h | Inflamed | AANAT     | protein_cc | chr17 | 74449433 | 74466199 | + | 2190  | 2.198091 | 0.470167 | -0.57039 | 0.180464 | -3.16068 | 0.002089 | 0.016803 | 1 |
| ENSG0000 | mucosal h | Inflamed | RP11-789C | lincRNA    | chr4  | 1.71E+08 | 1.71E+08 | + | 469   | 17.23628 | 0.105012 | 0.832452 | 0.263417 | 3.160211 | 0.002092 | 0.016823 | 1 |
| ENSG0000 | mucosal h | Inflamed | CD80      | protein_cc | chr3  | 1.19E+08 | 1.19E+08 | - | 3201  | 96.97375 | 0.004773 | -0.9749  | 0.308538 | -3.15973 | 0.002095 | 0.016838 | 1 |
| ENSG0000 | mucosal h | Inflamed | MRC2      | protein_cc | chr17 | 60704762 | 60770958 | + | 6860  | 3645.883 | 0        | -0.75343 | 0.238447 | -3.15973 | 0.002095 | 0.016838 | 1 |
| ENSG0000 | mucosal h | Inflamed | CSF1R     | protein_cc | chr5  | 1.49E+08 | 1.49E+08 | - | 5151  | 5543.723 | 0        | -0.52686 | 0.166752 | -3.15953 | 0.002096 | 0.016839 | 1 |
| ENSG0000 | mucosal h | Inflamed | SPATA20P  | pseudoger  | chr21 | 39610149 | 39610586 | - | 438   | 2.682578 | 0.687351 | -0.81127 | 0.256777 | -3.15945 | 0.002097 | 0.016839 | 1 |
| ENSG0000 | mucosal h | Inflamed | ADAM32    | protein_cc | chr8  | 38964509 | 39142430 | + | 10044 | 30.91647 | 0.009547 | 0.731469 | 0.231521 | 3.159411 | 0.002097 | 0.016839 | 1 |
| ENSG0000 | mucosal h | Inflamed | MTRNR2L1  | protein_cc | chr11 | 10529434 | 10530723 | - | 1290  | 323.3699 | 0        | 0.735284 | 0.232735 | 3.159312 | 0.002098 | 0.016839 | 1 |
| ENSG0000 | mucosal h | Inflamed | MIR3646   | miRNA      | chr20 | 43036760 | 43036843 | + | 84    | 2.317422 | 0.463007 | 0.508272 | 0.160947 | 3.158003 | 0.002106 | 0.016903 | 1 |
| ENSG0000 | mucosal h | Inflamed | BPHL      | protein_cc | chr6  | 3118608  | 3153812  | + | 5780  | 482.7422 | 0        | 0.349782 | 0.110769 | 3.157752 | 0.002108 | 0.016911 | 1 |
| ENSG0000 | mucosal h | Inflamed | USP2-AS1  | antisense  | chr11 | 1.19E+08 | 1.19E+08 | + | 4762  | 29.96181 | 0.019093 | 0.794278 | 0.251571 | 3.157265 | 0.002111 | 0.016931 | 1 |
| ENSG0000 | mucosal h | Inflamed | SLC44A1   | protein_cc | chr9  | 1.08E+08 | 1.08E+08 | + | 12613 | 7510.53  | 0        | 0.558088 | 0.176785 | 3.156873 | 0.002114 | 0.016947 | 1 |
| ENSG0000 | mucosal h | Inflamed | NAALADL1  | protein_cc | chr11 | 64812290 | 64826021 | - | 4044  | 820      | 0        | 0.977274 | 0.309621 | 3.156353 | 0.002117 | 0.016964 | 1 |
| ENSG0000 | mucosal h | Inflamed | DHX32     | protein_cc | chr10 | 1.28E+08 | 1.28E+08 | - | 3948  | 1668.062 | 0        | 0.545563 | 0.172847 | 3.156335 | 0.002117 | 0.016964 | 1 |
| ENSG0000 | mucosal h | Inflamed | SHISA6    | protein_cc | chr17 | 11144580 | 11467380 | + | 8527  | 16.94272 | 0.126492 | 1.061038 | 0.336178 | 3.156184 | 0.002118 | 0.016964 | 1 |
| ENSG0000 | mucosal h | Inflamed | XYLB      | protein_cc | chr3  | 38388251 | 38462839 | + | 5343  | 369.7542 | 0        | 0.409911 | 0.129876 | 3.156164 | 0.002118 | 0.016964 | 1 |
| ENSG0000 | mucosal h | Inflamed | MVB12B    | protein_cc | chr9  | 1.29E+08 | 1.29E+08 | + | 8070  | 1187.482 | 0        | 0.462841 | 0.146655 | 3.15599  | 0.002119 | 0.016968 | 1 |
| ENSG0000 | mucosal h | Inflamed | PHKA2     | protein_cc | chrX  | 18910418 | 19002716 | - | 9029  | 1233.16  | 0        | 0.432203 | 0.137012 | 3.154502 | 0.002129 | 0.017038 | 1 |
| ENSG0000 | mucosal h | Inflamed | LUM       | protein_cc | chr12 | 91496406 | 91505608 | - | 3008  | 8378.463 | 0        | -0.84655 | 0.268364 | -3.15447 | 0.00213  | 0.017038 | 1 |
| ENSG0000 | mucosal h | Inflamed | CCDC88A   | protein_cc | chr2  | 55514978 | 55647057 | - | 14537 | 471.5203 | 0        | -0.84922 | 0.269227 | -3.15428 | 0.002131 | 0.017042 | 1 |
| ENSG0000 | mucosal h | Inflamed | MYOZ3     | protein_cc | chr5  | 1.5E+08  | 1.5E+08  | + | 5409  | 27.24582 | 0.009547 | 0.584247 | 0.185237 | 3.154056 | 0.002132 | 0.017048 | 1 |
| ENSG0000 | mucosal h | Inflamed | DRD4      | protein_cc | chr11 | 637293   | 640706   | + | 1477  | 18.31742 | 0.00716  | 0.528714 | 0.167634 | 3.153983 | 0.002133 | 0.017048 | 1 |
| ENSG0000 | mucosal h | Inflamed | RP11-150C | lincRNA    | chr8  | 37454998 | 37457376 | - | 2379  | 292.463  | 0.00716  | 0.782248 | 0.248062 | 3.153438 | 0.002136 | 0.017072 | 1 |
| ENSG0000 | mucosal h | Inflamed | GDF9      | protein_cc | chr5  | 1.32E+08 | 1.32E+08 | - | 3103  | 10.90931 | 0.054893 | 0.587016 | 0.18617  | 3.153122 | 0.002138 | 0.017083 | 1 |
| ENSG0000 | mucosal h | Inflamed | NEURL2    | protein_cc | chr20 | 44517264 | 44519926 | - | 1301  | 86.25776 | 0        | 0.42082  | 0.133467 | 3.152993 | 0.002139 | 0.017085 | 1 |
| ENSG0000 | mucosal h | Inflamed | FAM117B   | protein_cc | chr2  | 2.03E+08 | 2.04E+08 | + | 5996  | 638.8878 | 0        | 0.568121 | 0.180224 | 3.152312 | 0.002144 | 0.017116 | 1 |
| ENSG0000 | mucosal h | Inflamed | RP5-903G1 | lincRNA    | chr11 | 67702034 | 67707245 | - | 455   | 9.739857 | 0.052506 | 0.697369 | 0.221256 | 3.151858 | 0.002147 | 0.017135 | 1 |
| ENSG0000 | mucosal h | Inflamed | PTPRC     | protein_cc | chr1  | 1.99E+08 | 1.99E+08 | + | 8507  | 3062.084 | 0        | -0.92289 | 0.29283  | -3.15164 | 0.002148 | 0.01714  | 1 |
| ENSG0000 | mucosal h | Inflamed | CARD6     | protein_cc | chr5  | 40841286 | 40860275 | + | 4397  | 428.4988 | 0        | -0.66849 | 0.212115 | -3.15156 | 0.002149 | 0.01714  | 1 |
| ENSG0000 | mucosal h | Inflamed | RP11-363E | sense_ove  | chr9  | 19453207 | 19455171 | + | 1965  | 208.4033 | 0.002387 | 0.832226 | 0.264083 | 3.151387 | 0.00215  | 0.01714  | 1 |
| ENSG0000 | mucosal h | Inflamed | KLF5      | protein_cc | chr13 | 73629114 | 73651676 | + | 3889  | 11616.94 | 0        | 0.755843 | 0.239846 | 3.151364 | 0.00215  | 0.01714  | 1 |
| ENSG0000 | mucosal h | Inflamed | GABPB2    | protein_cc | chr1  | 1.51E+08 | 1.51E+08 | + | 9189  | 1005.432 | 0        | 0.602257 | 0.191142 | 3.15084  | 0.002154 | 0.017162 | 1 |
| ENSG0000 | mucosal h | Inflamed | CTC-297N1 | lincRNA    | chr17 | 10561859 | 10562399 | - | 541   | 2.494033 | 0.417661 | 0.498374 | 0.158176 | 3.150759 | 0.002154 | 0.017162 | 1 |

|          |           |          |           |            |       |          |          |   |       |          |          |          |          |          |          |          |   |
|----------|-----------|----------|-----------|------------|-------|----------|----------|---|-------|----------|----------|----------|----------|----------|----------|----------|---|
| ENSG0000 | mucosal h | Inflamed | RNU6-548  | snRNA      | chr2  | 65221880 | 65221994 | + | 115   | 1.961814 | 0.541766 | -0.5308  | 0.168471 | -3.15068 | 0.002155 | 0.017162 | 1 |
| ENSG0000 | mucosal h | Inflamed | RP11-2027 | lincRNA    | chr3  | 1.34E+08 | 1.34E+08 | - | 640   | 8.646778 | 0.112172 | 0.652554 | 0.207155 | 3.15008  | 0.002159 | 0.017188 | 1 |
| ENSG0000 | mucosal h | Inflamed | CTD-2201  | antisense  | chr5  | 79348197 | 79379477 | - | 3233  | 18.99045 | 0.066826 | 0.748279 | 0.237577 | 3.149633 | 0.002162 | 0.017205 | 1 |
| ENSG0000 | mucosal h | Inflamed | BIRC5     | protein_cc | chr17 | 76210267 | 76221717 | + | 3815  | 759.0501 | 0        | -0.42413 | 0.134662 | -3.14957 | 0.002162 | 0.017205 | 1 |
| ENSG0000 | mucosal h | Inflamed | CIITA     | protein_cc | chr16 | 10971055 | 11026079 | + | 12036 | 3802.305 | 0        | -0.73224 | 0.232507 | -3.1493  | 0.002164 | 0.017214 | 1 |
| ENSG0000 | mucosal h | Inflamed | CALHM3    | protein_cc | chr10 | 1.05E+08 | 1.05E+08 | - | 1652  | 3.713604 | 0.498807 | -0.70236 | 0.223083 | -3.14842 | 0.00217  | 0.017256 | 1 |
| ENSG0000 | mucosal h | Inflamed | KIAA0195  | protein_cc | chr17 | 73437240 | 73496171 | + | 8854  | 4384.501 | 0        | 0.39714  | 0.126158 | 3.147956 | 0.002173 | 0.017276 | 1 |
| ENSG0000 | mucosal h | Inflamed | MIR600HC  | sense_intr | chr9  | 1.26E+08 | 1.26E+08 | - | 5984  | 446.6921 | 0.004773 | 0.823587 | 0.261679 | 3.14732  | 0.002177 | 0.0173   | 1 |
| ENSG0000 | mucosal h | Inflamed | TNFRSF11  | protein_cc | chr18 | 59992520 | 60058516 | + | 8984  | 3536.169 | 0        | 0.683268 | 0.217096 | 3.147303 | 0.002178 | 0.0173   | 1 |
| ENSG0000 | mucosal h | Inflamed | PKDREJ    | protein_cc | chr22 | 46651560 | 46659219 | - | 7660  | 41.40334 | 0.019093 | 0.93147  | 0.296014 | 3.146706 | 0.002182 | 0.017324 | 1 |
| ENSG0000 | mucosal h | Inflamed | RP11-5287 | lincRNA    | chr3  | 1.94E+08 | 1.94E+08 | - | 984   | 100.0644 | 0.01432  | 0.87691  | 0.278679 | 3.146667 | 0.002182 | 0.017324 | 1 |
| ENSG0000 | mucosal h | Inflamed | DESI1     | protein_cc | chr22 | 41994032 | 42017100 | - | 4972  | 2281.279 | 0        | -0.22175 | 0.070479 | -3.14641 | 0.002184 | 0.017333 | 1 |
| ENSG0000 | mucosal h | Inflamed | LY6G6C    | protein_cc | chr6  | 31686425 | 31689622 | - | 1103  | 8.670644 | 0.124105 | 0.779825 | 0.247869 | 3.146116 | 0.002186 | 0.017343 | 1 |
| ENSG0000 | mucosal h | Inflamed | ZFYVE21   | protein_cc | chr14 | 1.04E+08 | 1.04E+08 | + | 8390  | 1497.647 | 0        | 0.288038 | 0.091563 | 3.145778 | 0.002188 | 0.017356 | 1 |
| ENSG0000 | mucosal h | Inflamed | BCL2L13   | protein_cc | chr22 | 18111621 | 18213388 | + | 7527  | 2150.42  | 0        | 0.273681 | 0.087028 | 3.14473  | 0.002195 | 0.017401 | 1 |
| ENSG0000 | mucosal h | Inflamed | RDH13     | protein_cc | chr19 | 55550476 | 55582659 | - | 8575  | 1381.103 | 0        | 0.517941 | 0.164708 | 3.144611 | 0.002196 | 0.017401 | 1 |
| ENSG0000 | mucosal h | Inflamed | MTATP6P1  | pseudoger  | chr1  | 569076   | 569756   | + | 681   | 1792.938 | 0        | 0.527979 | 0.167902 | 3.144573 | 0.002196 | 0.017401 | 1 |
| ENSG0000 | mucosal h | Inflamed | SNORA53   | snoRNA     | chr12 | 98993413 | 98993661 | + | 249   | 4.298329 | 0.212411 | 0.53951  | 0.171569 | 3.144563 | 0.002196 | 0.017401 | 1 |
| ENSG0000 | mucosal h | Inflamed | ZXDC      | protein_cc | chr3  | 1.26E+08 | 1.26E+08 | - | 7357  | 1435.134 | 0        | 0.422276 | 0.134319 | 3.143828 | 0.002201 | 0.017432 | 1 |
| ENSG0000 | mucosal h | Inflamed | RP11-4F57 | lincRNA    | chr15 | 95024040 | 95027181 | + | 3142  | 483.9356 | 0        | 0.701044 | 0.222996 | 3.143747 | 0.002202 | 0.017432 | 1 |
| ENSG0000 | mucosal h | Inflamed | PRR22     | protein_cc | chr19 | 5782971  | 5784776  | - | 1806  | 87.51551 | 0        | 0.467146 | 0.148598 | 3.143695 | 0.002202 | 0.017432 | 1 |
| ENSG0000 | mucosal h | Inflamed | WIPF2     | protein_cc | chr17 | 38375556 | 38440388 | + | 8123  | 4771.368 | 0        | 0.38339  | 0.121985 | 3.142925 | 0.002207 | 0.017468 | 1 |
| ENSG0000 | mucosal h | Inflamed | C1orf168  | protein_cc | chr1  | 57184477 | 57285369 | - | 4633  | 9.078759 | 0.200477 | 0.771714 | 0.245572 | 3.142518 | 0.00221  | 0.017485 | 1 |
| ENSG0000 | mucosal h | Inflamed | MIR570    | miRNA      | chr3  | 1.95E+08 | 1.95E+08 | + | 97    | 45.52983 | 0.033413 | 0.871203 | 0.27727  | 3.142075 | 0.002213 | 0.017501 | 1 |
| ENSG0000 | mucosal h | Inflamed | AIM2      | protein_cc | chr1  | 1.59E+08 | 1.59E+08 | - | 2009  | 143.7542 | 0        | -0.90751 | 0.288835 | -3.14197 | 0.002214 | 0.017501 | 1 |
| ENSG0000 | mucosal h | Inflamed | PLEKHA6   | protein_cc | chr1  | 2.04E+08 | 2.04E+08 | - | 7820  | 7996.263 | 0        | 0.619068 | 0.197034 | 3.141932 | 0.002214 | 0.017501 | 1 |
| ENSG0000 | mucosal h | Inflamed | MFGE8     | protein_cc | chr15 | 89441916 | 89456642 | - | 4744  | 3711.134 | 0        | -0.58005 | 0.184631 | -3.14166 | 0.002216 | 0.01751  | 1 |
| ENSG0000 | mucosal h | Inflamed | DEFB4B    | protein_cc | chr8  | 7272382  | 7274385  | - | 332   | 5.224344 | 0.742243 | -0.80042 | 0.254826 | -3.14106 | 0.00222  | 0.017538 | 1 |
| ENSG0000 | mucosal h | Inflamed | ZNF608    | protein_cc | chr5  | 1.24E+08 | 1.24E+08 | - | 6920  | 651.0048 | 0        | 0.674013 | 0.214665 | 3.13983  | 0.002229 | 0.0176   | 1 |
| ENSG0000 | mucosal h | Inflamed | MTND4P1   | pseudoger  | chr5  | 1.34E+08 | 1.34E+08 | - | 1377  | 1433.26  | 0        | 0.508956 | 0.162176 | 3.138306 | 0.002239 | 0.017678 | 1 |
| ENSG0000 | mucosal h | Inflamed | ZNF232    | protein_cc | chr17 | 5008836  | 5026411  | - | 2794  | 224.5943 | 0        | 0.358669 | 0.114344 | 3.136765 | 0.00225  | 0.017755 | 1 |
| ENSG0000 | mucosal h | Inflamed | RP11-420L | antisense  | chr6  | 3751345  | 3754105  | + | 2761  | 68.39857 | 0.002387 | -0.59856 | 0.190827 | -3.13664 | 0.002251 | 0.017755 | 1 |
| ENSG0000 | mucosal h | Inflamed | FOLR3     | protein_cc | chr11 | 71825915 | 71850936 | + | 1394  | 27.33174 | 0.353222 | -1.13065 | 0.360468 | -3.13661 | 0.002251 | 0.017755 | 1 |
| ENSG0000 | mucosal h | Inflamed | TMEM56    | protein_cc | chr1  | 95582894 | 95663163 | + | 7402  | 818.1575 | 0        | 0.9579   | 0.305427 | 3.136261 | 0.002253 | 0.017764 | 1 |
| ENSG0000 | mucosal h | Inflamed | MIR4701   | miRNA      | chr12 | 49165758 | 49165820 | - | 63    | 4.828162 | 0.286396 | 0.565419 | 0.180285 | 3.136253 | 0.002253 | 0.017764 | 1 |
| ENSG0000 | mucosal h | Inflamed | SHROOM3   | protein_cc | chr4  | 77356253 | 77704406 | + | 13159 | 9901.033 | 0        | 0.671895 | 0.214281 | 3.13558  | 0.002258 | 0.017796 | 1 |
| ENSG0000 | mucosal h | Inflamed | DNAJC1    | protein_cc | chr10 | 22045466 | 22292698 | - | 2501  | 1181.649 | 0        | -0.36741 | 0.117186 | -3.13525 | 0.00226  | 0.017809 | 1 |
| ENSG0000 | mucosal h | Inflamed | ARRB1     | protein_cc | chr11 | 74975226 | 75062873 | - | 5976  | 2519.239 | 0        | 0.337865 | 0.107769 | 3.135082 | 0.002262 | 0.01781  | 1 |
| ENSG0000 | mucosal h | Inflamed | HLX       | protein_cc | chr1  | 2.21E+08 | 2.21E+08 | + | 4144  | 541.4129 | 0        | -0.63943 | 0.203963 | -3.13504 | 0.002262 | 0.01781  | 1 |
| ENSG0000 | mucosal h | Inflamed | SUMF1     | protein_cc | chr3  | 3742498  | 4508965  | - | 6952  | 1352.093 | 0        | 0.298801 | 0.095317 | 3.1348   | 0.002264 | 0.017817 | 1 |

|          |           |          |            |            |       |          |          |   |      |          |          |          |          |          |          |          |   |
|----------|-----------|----------|------------|------------|-------|----------|----------|---|------|----------|----------|----------|----------|----------|----------|----------|---|
| ENSG0000 | mucosal h | Inflamed | CARD9      | protein_cc | chr9  | 1.39E+08 | 1.39E+08 | - | 6699 | 249.4582 | 0        | -0.53336 | 0.170188 | -3.13396 | 0.00227  | 0.017859 | 1 |
| ENSG0000 | mucosal h | Inflamed | MTRNR2L6   | protein_cc | chr7  | 1.42E+08 | 1.42E+08 | + | 1447 | 9.508353 | 0.107399 | 0.694796 | 0.221708 | 3.133831 | 0.00227  | 0.01786  | 1 |
| ENSG0000 | mucosal h | Inflamed | RNF144A-1  | processed  | chr2  | 7052408  | 7058840  | - | 4648 | 34.68496 | 0.01432  | -0.73333 | 0.234026 | -3.13353 | 0.002273 | 0.017872 | 1 |
| ENSG0000 | mucosal h | Inflamed | AC011330   | pseudoger  | chr15 | 43955852 | 43976537 | - | 3235 | 8.365155 | 0.150358 | 0.635397 | 0.20281  | 3.13296  | 0.002277 | 0.01789  | 1 |
| ENSG0000 | mucosal h | Inflamed | ACAP1      | protein_cc | chr17 | 7239848  | 7254797  | + | 7421 | 1470.544 | 0        | -0.70003 | 0.223442 | -3.13293 | 0.002277 | 0.01789  | 1 |
| ENSG0000 | mucosal h | Inflamed | RP11-30P6  | lincRNA    | chr6  | 86096937 | 86099904 | - | 2513 | 194.3126 | 0.00716  | 1.029013 | 0.328452 | 3.132916 | 0.002277 | 0.01789  | 1 |
| ENSG0000 | mucosal h | Inflamed | P2RY13     | protein_cc | chr3  | 1.51E+08 | 1.51E+08 | - | 2764 | 433.2673 | 0        | -0.83638 | 0.26698  | -3.13273 | 0.002278 | 0.017895 | 1 |
| ENSG0000 | mucosal h | Inflamed | KRT12      | protein_cc | chr17 | 39017555 | 39023462 | - | 1867 | 68.76372 | 0.02148  | 1.060283 | 0.338486 | 3.132429 | 0.00228  | 0.017906 | 1 |
| ENSG0000 | mucosal h | Inflamed | Y_RNA      | misc_RNA   | chr9  | 1.33E+08 | 1.33E+08 | + | 107  | 0.923628 | 0.761337 | 0.333711 | 0.106552 | 3.131923 | 0.002284 | 0.017925 | 1 |
| ENSG0000 | mucosal h | Inflamed | ANO2       | protein_cc | chr12 | 5641035  | 6055398  | - | 6012 | 37.40334 | 0.002387 | -0.60254 | 0.192389 | -3.13188 | 0.002284 | 0.017925 | 1 |
| ENSG0000 | mucosal h | Inflamed | DUSP22     | protein_cc | chr6  | 291630   | 351355   | + | 5686 | 1728.189 | 0        | -0.35579 | 0.113614 | -3.13156 | 0.002286 | 0.017938 | 1 |
| ENSG0000 | mucosal h | Inflamed | RP11-57H1  | sense_intr | chr1  | 95585703 | 95604110 | + | 420  | 4.002387 | 0.372315 | 0.539681 | 0.172342 | 3.131462 | 0.002287 | 0.017938 | 1 |
| ENSG0000 | mucosal h | Inflamed | SLC17A4    | protein_cc | chr6  | 25754927 | 25781419 | + | 4633 | 1489.36  | 0.00716  | 1.415996 | 0.452335 | 3.130413 | 0.002295 | 0.017991 | 1 |
| ENSG0000 | mucosal h | Inflamed | PLEKHG6    | protein_cc | chr12 | 6419602  | 6437672  | + | 4260 | 3806.47  | 0        | 0.906624 | 0.289631 | 3.130276 | 0.002296 | 0.017993 | 1 |
| ENSG0000 | mucosal h | Inflamed | LMTK2      | protein_cc | chr7  | 97736197 | 97838945 | + | 9139 | 4203.153 | 0        | 0.555111 | 0.177359 | 3.12988  | 0.002298 | 0.01801  | 1 |
| ENSG0000 | mucosal h | Inflamed | ATP13A5    | protein_cc | chr3  | 1.93E+08 | 1.93E+08 | - | 6228 | 0.959427 | 0.768496 | 0.388552 | 0.12415  | 3.129696 | 0.0023   | 0.018015 | 1 |
| ENSG0000 | mucosal h | Inflamed | PPBP       | protein_cc | chr4  | 74852755 | 74853914 | - | 715  | 7.961814 | 0.360382 | -1.01798 | 0.325303 | -3.12934 | 0.002302 | 0.01803  | 1 |
| ENSG0000 | mucosal h | Inflamed | SEMA6B     | protein_cc | chr19 | 4542600  | 4559820  | - | 4423 | 1269.081 | 0        | -0.68419 | 0.218648 | -3.12918 | 0.002303 | 0.018033 | 1 |
| ENSG0000 | mucosal h | Inflamed | ECM1       | protein_cc | chr1  | 1.5E+08  | 1.5E+08  | + | 3360 | 1966.866 | 0        | -0.60065 | 0.191981 | -3.12867 | 0.002307 | 0.018056 | 1 |
| ENSG0000 | mucosal h | Inflamed | OSTN-AS1   | antisense  | chr3  | 1.91E+08 | 1.91E+08 | - | 515  | 8.484487 | 0.147971 | -0.73128 | 0.233755 | -3.1284  | 0.002309 | 0.018066 | 1 |
| ENSG0000 | mucosal h | Inflamed | ZBTB48     | protein_cc | chr1  | 6640061  | 6649340  | + | 4503 | 1071.931 | 0        | 0.313613 | 0.100251 | 3.128274 | 0.00231  | 0.018067 | 1 |
| ENSG0000 | mucosal h | Inflamed | RP1-35C21  | lincRNA    | chr1  | 1.77E+08 | 1.77E+08 | + | 491  | 11.47255 | 0.295943 | 0.61007  | 0.195073 | 3.127395 | 0.002316 | 0.018111 | 1 |
| ENSG0000 | mucosal h | Inflamed | TBX10      | protein_cc | chr11 | 67398774 | 67407031 | - | 1548 | 476.673  | 0.002387 | 1.165389 | 0.372668 | 3.127155 | 0.002318 | 0.018119 | 1 |
| ENSG0000 | mucosal h | Inflamed | NCBP2-AS1  | lincRNA    | chr3  | 1.97E+08 | 1.97E+08 | + | 918  | 520.2864 | 0        | 0.294598 | 0.094217 | 3.126793 | 0.00232  | 0.01813  | 1 |
| ENSG0000 | mucosal h | Inflamed | SPATA20    | protein_cc | chr17 | 48620419 | 48633213 | + | 5237 | 3318.542 | 0        | 0.279935 | 0.089529 | 3.126765 | 0.002321 | 0.01813  | 1 |
| ENSG0000 | mucosal h | Inflamed | CALHM2     | protein_cc | chr10 | 1.05E+08 | 1.05E+08 | - | 3620 | 705.2554 | 0        | -0.59523 | 0.190419 | -3.12587 | 0.002327 | 0.018173 | 1 |
| ENSG0000 | mucosal h | Inflamed | GLIS1      | protein_cc | chr1  | 53971910 | 54199877 | - | 2812 | 70.06683 | 0.023866 | -0.81524 | 0.260814 | -3.12577 | 0.002328 | 0.018173 | 1 |
| ENSG0000 | mucosal h | Inflamed | PAXIP1-AS1 | lincRNA    | chr7  | 1.55E+08 | 1.55E+08 | + | 2256 | 246.2172 | 0        | 0.425971 | 0.13628  | 3.125706 | 0.002328 | 0.018173 | 1 |
| ENSG0000 | mucosal h | Inflamed | RIPK2      | protein_cc | chr8  | 90769975 | 90803291 | + | 3117 | 421.5967 | 0        | -0.51821 | 0.165794 | -3.12563 | 0.002329 | 0.018173 | 1 |
| ENSG0000 | mucosal h | Inflamed | LY86       | protein_cc | chr6  | 6588341  | 6655216  | + | 1254 | 167.1814 | 0        | -0.63904 | 0.204494 | -3.12499 | 0.002333 | 0.018203 | 1 |
| ENSG0000 | mucosal h | Inflamed | KRBA2      | protein_cc | chr17 | 8271955  | 8280029  | - | 2794 | 30.57757 | 0.023866 | 0.570745 | 0.18265  | 3.1248   | 0.002335 | 0.018203 | 1 |
| ENSG0000 | mucosal h | Inflamed | AC024560   | pseudoger  | chr3  | 1.97E+08 | 1.97E+08 | - | 3502 | 796.5513 | 0        | 0.778927 | 0.249275 | 3.124767 | 0.002335 | 0.018203 | 1 |
| ENSG0000 | mucosal h | Inflamed | NUTM2D     | protein_cc | chr10 | 89117425 | 89130452 | + | 6985 | 70.26969 | 0.009547 | 0.532223 | 0.170329 | 3.124671 | 0.002336 | 0.018203 | 1 |
| ENSG0000 | mucosal h | Inflamed | RP11-88H1  | lincRNA    | chr1  | 1.13E+08 | 1.13E+08 | + | 3590 | 40.01671 | 0.02148  | -1.04421 | 0.334198 | -3.12453 | 0.002337 | 0.018203 | 1 |
| ENSG0000 | mucosal h | Inflamed | CASC4P1    | pseudoger  | chr13 | 20137729 | 20139040 | - | 1312 | 6.923628 | 0.157518 | -0.70807 | 0.226619 | -3.12451 | 0.002337 | 0.018203 | 1 |
| ENSG0000 | mucosal h | Inflamed | LINC00511  | lincRNA    | chr17 | 70319264 | 70636611 | - | 8615 | 726.6253 | 0        | 0.48723  | 0.155944 | 3.124393 | 0.002338 | 0.018204 | 1 |
| ENSG0000 | mucosal h | Inflamed | RGS18      | protein_cc | chr1  | 1.92E+08 | 1.92E+08 | + | 2806 | 119.1599 | 0        | -0.72961 | 0.233544 | -3.1241  | 0.00234  | 0.018212 | 1 |
| ENSG0000 | mucosal h | Inflamed | DDA1       | protein_cc | chr19 | 17420327 | 17434110 | + | 4596 | 1888.916 | 0        | 0.231956 | 0.074249 | 3.124014 | 0.00234  | 0.018212 | 1 |
| ENSG0000 | mucosal h | Inflamed | MYRIP      | protein_cc | chr3  | 39850405 | 40301812 | + | 5872 | 362.9403 | 0        | 0.603101 | 0.193056 | 3.123967 | 0.002341 | 0.018212 | 1 |
| ENSG0000 | mucosal h | Inflamed | RP11-328H1 | antisense  | chr6  | 41462591 | 41516359 | - | 934  | 15.14797 | 0.038186 | 0.672491 | 0.215293 | 3.123606 | 0.002343 | 0.018227 | 1 |



|          |           |          |           |            |       |          |          |   |       |          |          |          |          |          |          |          |   |
|----------|-----------|----------|-----------|------------|-------|----------|----------|---|-------|----------|----------|----------|----------|----------|----------|----------|---|
| ENSG0000 | mucosal h | Inflamed | MINOS1    | protein_cc | chr1  | 19923477 | 19956314 | + | 5220  | 788.315  | 0        | 0.301025 | 0.09639  | 3.122977 | 0.002348 | 0.018257 | 1 |
| ENSG0000 | mucosal h | Inflamed | GUCY1B3   | protein_cc | chr4  | 1.57E+08 | 1.57E+08 | + | 3724  | 332.969  | 0.002387 | -0.93268 | 0.29866  | -3.12287 | 0.002349 | 0.018257 | 1 |
| ENSG0000 | mucosal h | Inflamed | IGFBP5    | protein_cc | chr2  | 2.18E+08 | 2.18E+08 | - | 6442  | 29509.17 | 0        | -1.0887  | 0.348631 | -3.12279 | 0.002349 | 0.018257 | 1 |
| ENSG0000 | mucosal h | Inflamed | SCYL1     | protein_cc | chr11 | 65292548 | 65306175 | + | 4282  | 3730.542 | 0        | -0.25208 | 0.080749 | -3.12174 | 0.002357 | 0.018306 | 1 |
| ENSG0000 | mucosal h | Inflamed | FZD10     | protein_cc | chr12 | 1.31E+08 | 1.31E+08 | + | 3282  | 107.5227 | 0.00716  | -0.84447 | 0.270515 | -3.12172 | 0.002357 | 0.018306 | 1 |
| ENSG0000 | mucosal h | Inflamed | KB-431C1  | antisense  | chr8  | 1.03E+08 | 1.03E+08 | + | 2355  | 71.06205 | 0        | 0.598324 | 0.191698 | 3.12118  | 0.002361 | 0.018332 | 1 |
| ENSG0000 | mucosal h | Inflamed | PKIB      | protein_cc | chr6  | 1.23E+08 | 1.23E+08 | + | 3270  | 1891.671 | 0        | 1.064329 | 0.341026 | 3.120967 | 0.002363 | 0.018338 | 1 |
| ENSG0000 | mucosal h | Inflamed | OLR1      | protein_cc | chr12 | 10310902 | 10324737 | - | 3055  | 57.09308 | 0.045346 | -1.2461  | 0.399291 | -3.12079 | 0.002364 | 0.01834  | 1 |
| ENSG0000 | mucosal h | Inflamed | SLC4A10   | protein_cc | chr2  | 1.62E+08 | 1.63E+08 | + | 7550  | 65.29117 | 0.026253 | 0.829359 | 0.265757 | 3.120737 | 0.002364 | 0.01834  | 1 |
| ENSG0000 | mucosal h | Inflamed | CTD-2314C | antisense  | chr5  | 50668570 | 50679166 | - | 7152  | 38.23628 | 0.031026 | 0.991538 | 0.317748 | 3.120522 | 0.002366 | 0.018347 | 1 |
| ENSG0000 | mucosal h | Inflamed | STAP1     | protein_cc | chr4  | 68424446 | 68473055 | + | 1655  | 97.14797 | 0        | -0.85672 | 0.274553 | -3.12041 | 0.002367 | 0.018348 | 1 |
| ENSG0000 | mucosal h | Inflamed | HHATL     | protein_cc | chr3  | 42734155 | 42744319 | - | 2891  | 2.911695 | 0.556086 | 0.50255  | 0.161082 | 3.119847 | 0.002371 | 0.018374 | 1 |
| ENSG0000 | mucosal h | Inflamed | RASSF1    | protein_cc | chr3  | 50367219 | 50378411 | - | 3677  | 1347.721 | 0        | -0.31106 | 0.099707 | -3.11976 | 0.002371 | 0.018374 | 1 |
| ENSG0000 | mucosal h | Inflamed | DUSP18    | protein_cc | chr22 | 31048038 | 31063877 | - | 4450  | 506.1289 | 0        | 0.313771 | 0.100599 | 3.119035 | 0.002377 | 0.01841  | 1 |
| ENSG0000 | mucosal h | Inflamed | AGBL5     | protein_cc | chr2  | 27265232 | 27293490 | + | 5283  | 793.1838 | 0        | 0.265532 | 0.085138 | 3.118844 | 0.002378 | 0.018415 | 1 |
| ENSG0000 | mucosal h | Inflamed | SPRN      | protein_cc | chr10 | 1.35E+08 | 1.35E+08 | - | 3269  | 7.813842 | 0.133652 | -0.70954 | 0.227515 | -3.11866 | 0.002379 | 0.01842  | 1 |
| ENSG0000 | mucosal h | Inflamed | ZNF577    | protein_cc | chr19 | 52359055 | 52394203 | - | 6234  | 210.2291 | 0        | 0.728776 | 0.233692 | 3.118537 | 0.00238  | 0.018422 | 1 |
| ENSG0000 | mucosal h | Inflamed | PHLDB3    | protein_cc | chr19 | 43979106 | 44009087 | - | 4553  | 396.8831 | 0        | 0.338062 | 0.108409 | 3.118385 | 0.002381 | 0.018425 | 1 |
| ENSG0000 | mucosal h | Inflamed | RPN1      | protein_cc | chr3  | 1.28E+08 | 1.28E+08 | - | 3988  | 11124.56 | 0        | -0.28269 | 0.090662 | -3.11809 | 0.002384 | 0.018436 | 1 |
| ENSG0000 | mucosal h | Inflamed | RP11-671J | antisense  | chr14 | 35025980 | 35030504 | + | 1137  | 1.224344 | 0.711217 | 0.332119 | 0.106584 | 3.116037 | 0.002399 | 0.018548 | 1 |
| ENSG0000 | mucosal h | Inflamed | KLHL36    | protein_cc | chr16 | 84682131 | 84701292 | + | 9995  | 2954.516 | 0        | 0.363224 | 0.116594 | 3.115299 | 0.002404 | 0.018583 | 1 |
| ENSG0000 | mucosal h | Inflamed | GRIK2     | protein_cc | chr6  | 1.02E+08 | 1.03E+08 | + | 7492  | 16.2148  | 0.062053 | 0.766663 | 0.246101 | 3.11524  | 0.002405 | 0.018583 | 1 |
| ENSG0000 | mucosal h | Inflamed | RARRES2   | protein_cc | chr7  | 1.5E+08  | 1.5E+08  | - | 1919  | 2346.888 | 0        | -0.73101 | 0.234685 | -3.11484 | 0.002408 | 0.0186   | 1 |
| ENSG0000 | mucosal h | Inflamed | CYP2W1    | protein_cc | chr7  | 1022835  | 1029276  | + | 2773  | 84.33652 | 0.026253 | 1.3846   | 0.444577 | 3.11442  | 0.002411 | 0.018619 | 1 |
| ENSG0000 | mucosal h | Inflamed | OTOP3     | protein_cc | chr17 | 72931814 | 72946087 | + | 2516  | 41.06205 | 0.171838 | 1.337454 | 0.429484 | 3.114092 | 0.002413 | 0.018632 | 1 |
| ENSG0000 | mucosal h | Inflamed | SLC1A7    | protein_cc | chr1  | 53552855 | 53608289 | - | 4237  | 78.70883 | 0.047733 | 1.179936 | 0.378915 | 3.113987 | 0.002414 | 0.018633 | 1 |
| ENSG0000 | mucosal h | Inflamed | CERS6     | protein_cc | chr2  | 1.69E+08 | 1.7E+08  | + | 7238  | 3335.174 | 0        | 0.693153 | 0.222601 | 3.113876 | 0.002415 | 0.018634 | 1 |
| ENSG0000 | mucosal h | Inflamed | RP11-524f | antisense  | chr6  | 54704916 | 54705653 | - | 586   | 11.46062 | 0.095465 | 0.644744 | 0.207067 | 3.113698 | 0.002416 | 0.018635 | 1 |
| ENSG0000 | mucosal h | Inflamed | SERPINA4  | protein_cc | chr14 | 95027428 | 95036250 | + | 2338  | 1.930788 | 0.692124 | -0.67913 | 0.218118 | -3.11359 | 0.002417 | 0.018635 | 1 |
| ENSG0000 | mucosal h | Inflamed | GNG13     | protein_cc | chr16 | 848041   | 850733   | - | 984   | 23.63962 | 0.147971 | 1.019077 | 0.327301 | 3.113574 | 0.002417 | 0.018635 | 1 |
| ENSG0000 | mucosal h | Inflamed | DOPEY2    | protein_cc | chr21 | 37529080 | 37666572 | + | 9030  | 3773.802 | 0        | 0.6081   | 0.195328 | 3.113227 | 0.00242  | 0.018649 | 1 |
| ENSG0000 | mucosal h | Inflamed | NAGLU     | protein_cc | chr17 | 40688190 | 40696467 | + | 3004  | 2033.63  | 0        | -0.25991 | 0.083502 | -3.11259 | 0.002424 | 0.01868  | 1 |
| ENSG0000 | mucosal h | Inflamed | RP11-134k | lincRNA    | chr6  | 71306141 | 71306683 | + | 543   | 4.212411 | 0.26969  | 0.528567 | 0.169832 | 3.112302 | 0.002427 | 0.018691 | 1 |
| ENSG0000 | mucosal h | Inflamed | SH2B1     | protein_cc | chr16 | 28857921 | 28885526 | + | 7138  | 3388.126 | 0        | 0.379621 | 0.121982 | 3.11211  | 0.002428 | 0.018697 | 1 |
| ENSG0000 | mucosal h | Inflamed | SGIP1     | protein_cc | chr1  | 66999066 | 67213982 | + | 10493 | 220.9045 | 0.00716  | -1.01645 | 0.326643 | -3.11181 | 0.00243  | 0.018709 | 1 |
| ENSG0000 | mucosal h | Inflamed | HOXA13    | protein_cc | chr7  | 27233122 | 27239725 | - | 4664  | 1290.375 | 0.01432  | 0.865794 | 0.278255 | 3.111508 | 0.002433 | 0.018721 | 1 |
| ENSG0000 | mucosal h | Inflamed | PPAPDC3   | protein_cc | chr9  | 1.34E+08 | 1.34E+08 | + | 2430  | 102.0286 | 0        | -0.67388 | 0.216605 | -3.11108 | 0.002436 | 0.018737 | 1 |
| ENSG0000 | mucosal h | Inflamed | AGAP8     | protein_cc | chr10 | 51224681 | 51371321 | - | 3941  | 52.77566 | 0.026253 | 0.817963 | 0.262923 | 3.111034 | 0.002436 | 0.018737 | 1 |
| ENSG0000 | mucosal h | Inflamed | CASP6     | protein_cc | chr4  | 1.11E+08 | 1.11E+08 | - | 1936  | 999.642  | 0        | 0.520882 | 0.167436 | 3.110942 | 0.002437 | 0.018737 | 1 |
| ENSG0000 | mucosal h | Inflamed | AC019330  | lincRNA    | chr2  | 1.99E+08 | 2E+08    | - | 504   | 3.594272 | 0.548926 | 0.555088 | 0.178444 | 3.110709 | 0.002438 | 0.018745 | 1 |

|          |           |          |            |               |       |          |          |   |       |          |          |          |          |          |          |          |   |
|----------|-----------|----------|------------|---------------|-------|----------|----------|---|-------|----------|----------|----------|----------|----------|----------|----------|---|
| ENSG0000 | mucosal h | Inflamed | CCRN4L     | protein_cc    | chr4  | 1.4E+08  | 1.4E+08  | + | 1769  | 257.0931 | 0.002387 | -0.58843 | 0.189172 | -3.11056 | 0.00244  | 0.018748 | 1 |
| ENSG0000 | mucosal h | Inflamed | TAS2R6     | pseudoger     | chr7  | 1.41E+08 | 1.41E+08 | + | 826   | 12.01909 | 0.124105 | 0.784312 | 0.252198 | 3.109908 | 0.002445 | 0.01878  | 1 |
| ENSG0000 | mucosal h | Inflamed | TRAF4      | protein_cc    | chr17 | 27071002 | 27077974 | + | 4594  | 2934.305 | 0        | 0.288039 | 0.092622 | 3.109821 | 0.002445 | 0.01878  | 1 |
| ENSG0000 | mucosal h | Inflamed | C11orf49   | protein_cc    | chr11 | 46958240 | 47185936 | + | 5671  | 993.3126 | 0        | 0.287784 | 0.092552 | 3.109422 | 0.002448 | 0.018798 | 1 |
| ENSG0000 | mucosal h | Inflamed | IGFLR1     | protein_cc    | chr19 | 36230058 | 36233354 | - | 1847  | 66.21957 | 0.002387 | -0.57256 | 0.184167 | -3.10894 | 0.002452 | 0.01882  | 1 |
| ENSG0000 | mucosal h | Inflamed | RP11-505k  | antisense     | chr16 | 84150656 | 84151176 | + | 521   | 15.70406 | 0        | -0.41545 | 0.133685 | -3.1077  | 0.002461 | 0.018887 | 1 |
| ENSG0000 | mucosal h | Inflamed | GBP1P1     | pseudoger     | chr1  | 89873238 | 89891802 | + | 2352  | 55.28878 | 0.01432  | -0.93725 | 0.3016   | -3.10758 | 0.002462 | 0.018888 | 1 |
| ENSG0000 | mucosal h | Inflamed | RP11-357L  | processed_chr | 5     | 66759637 | 66771420 | - | 837   | 1.252983 | 0.732697 | 0.460589 | 0.148252 | 3.106805 | 0.002468 | 0.018927 | 1 |
| ENSG0000 | mucosal h | Inflamed | OPLAH      | protein_cc    | chr8  | 1.45E+08 | 1.45E+08 | - | 4321  | 1572.962 | 0        | 0.508979 | 0.163837 | 3.106622 | 0.002469 | 0.018933 | 1 |
| ENSG0000 | mucosal h | Inflamed | MXRA5      | protein_cc    | chrX  | 3226606  | 3264682  | - | 9793  | 7582.747 | 0        | -0.79294 | 0.255282 | -3.10613 | 0.002473 | 0.018956 | 1 |
| ENSG0000 | mucosal h | Inflamed | SMAD7      | protein_cc    | chr18 | 46446223 | 46477081 | - | 3692  | 1275.165 | 0        | 0.411474 | 0.132489 | 3.105721 | 0.002476 | 0.018971 | 1 |
| ENSG0000 | mucosal h | Inflamed | CXorf21    | protein_cc    | chrX  | 30576941 | 30595961 | - | 1855  | 123.0215 | 0.002387 | -0.75769 | 0.243968 | -3.10568 | 0.002477 | 0.018971 | 1 |
| ENSG0000 | mucosal h | Inflamed | Y_RNA      | misc_RNA      | chr2  | 85661630 | 85661742 | + | 113   | 3.77327  | 0.463007 | 0.570835 | 0.183822 | 3.105366 | 0.002479 | 0.018984 | 1 |
| ENSG0000 | mucosal h | Inflamed | PTPRF      | protein_cc    | chr1  | 43990858 | 44089343 | + | 10719 | 27418.13 | 0        | 0.709892 | 0.228626 | 3.105037 | 0.002481 | 0.018998 | 1 |
| ENSG0000 | mucosal h | Inflamed | AC093585   | antisense     | chr2  | 2.42E+08 | 2.42E+08 | - | 428   | 0.952267 | 0.768496 | 0.340665 | 0.109718 | 3.104927 | 0.002482 | 0.018998 | 1 |
| ENSG0000 | mucosal h | Inflamed | AC090587   | sense_ove     | chr11 | 3837982  | 3843130  | + | 2843  | 54.36993 | 0.045346 | 0.890568 | 0.286881 | 3.10431  | 0.002487 | 0.019029 | 1 |
| ENSG0000 | mucosal h | Inflamed | GYG1       | protein_cc    | chr3  | 1.49E+08 | 1.49E+08 | + | 3475  | 1042.988 | 0        | -0.35931 | 0.115781 | -3.10335 | 0.002494 | 0.019068 | 1 |
| ENSG0000 | mucosal h | Inflamed | SIK2       | protein_cc    | chr11 | 1.11E+08 | 1.12E+08 | + | 9796  | 2630.138 | 0        | 0.421987 | 0.135981 | 3.103287 | 0.002495 | 0.019068 | 1 |
| ENSG0000 | mucosal h | Inflamed | FAM211A    | protein_cc    | chr17 | 16344891 | 16395467 | - | 3695  | 1882.995 | 0        | 0.706093 | 0.227536 | 3.103213 | 0.002495 | 0.019068 | 1 |
| ENSG0000 | mucosal h | Inflamed | GTSF1L     | protein_cc    | chr20 | 42354804 | 42355638 | - | 835   | 2.317422 | 0.579952 | -0.54588 | 0.17591  | -3.1032  | 0.002496 | 0.019068 | 1 |
| ENSG0000 | mucosal h | Inflamed | DOLK       | protein_cc    | chr9  | 1.32E+08 | 1.32E+08 | - | 2090  | 606.1814 | 0        | -0.26315 | 0.084802 | -3.10317 | 0.002496 | 0.019068 | 1 |
| ENSG0000 | mucosal h | Inflamed | FSCN3      | protein_cc    | chr7  | 1.27E+08 | 1.27E+08 | + | 3214  | 4.501193 | 0.178998 | 0.506121 | 0.163134 | 3.102487 | 0.002501 | 0.019103 | 1 |
| ENSG0000 | mucosal h | Inflamed | ITGA5      | protein_cc    | chr12 | 54789045 | 54813244 | - | 7577  | 4737.473 | 0        | -0.92198 | 0.297209 | -3.10213 | 0.002504 | 0.019118 | 1 |
| ENSG0000 | mucosal h | Inflamed | SH3YL1     | protein_cc    | chr2  | 217730   | 266398   | - | 11165 | 1529.854 | 0        | 0.590084 | 0.190246 | 3.101686 | 0.002507 | 0.019139 | 1 |
| ENSG0000 | mucosal h | Inflamed | FKBP2      | protein_cc    | chr11 | 64008475 | 64011604 | + | 1608  | 2135.511 | 0        | -0.36001 | 0.116073 | -3.10156 | 0.002508 | 0.01914  | 1 |
| ENSG0000 | mucosal h | Inflamed | TMEM171    | protein_cc    | chr5  | 72416119 | 72427644 | + | 1535  | 1590.508 | 0        | 0.855296 | 0.275796 | 3.101191 | 0.002511 | 0.019157 | 1 |
| ENSG0000 | mucosal h | Inflamed | FXYD3      | protein_cc    | chr19 | 35606732 | 35615228 | + | 3385  | 17661.71 | 0        | 0.937498 | 0.302316 | 3.101053 | 0.002512 | 0.019157 | 1 |
| ENSG0000 | mucosal h | Inflamed | MIF        | protein_cc    | chr22 | 24236191 | 24237414 | + | 1109  | 2893.979 | 0        | -0.45347 | 0.146235 | -3.10099 | 0.002513 | 0.019157 | 1 |
| ENSG0000 | mucosal h | Inflamed | RP11-223C  | lincRNA       | chr4  | 1.43E+08 | 1.44E+08 | + | 512   | 22.18616 | 0.066826 | -0.955   | 0.308002 | -3.10063 | 0.002515 | 0.019167 | 1 |
| ENSG0000 | mucosal h | Inflamed | TBPL2      | protein_cc    | chr14 | 55880259 | 55923444 | - | 2407  | 1.863962 | 0.646778 | 0.483873 | 0.156061 | 3.10053  | 0.002516 | 0.019167 | 1 |
| ENSG0000 | mucosal h | Inflamed | DMAP1      | protein_cc    | chr1  | 44679127 | 44686353 | + | 5599  | 1459.683 | 0        | 0.324319 | 0.104601 | 3.100529 | 0.002516 | 0.019167 | 1 |
| ENSG0000 | mucosal h | Inflamed | C11orf84   | protein_cc    | chr11 | 63580860 | 63595190 | + | 2807  | 558.9928 | 0        | -0.39952 | 0.128859 | -3.10044 | 0.002517 | 0.019167 | 1 |
| ENSG0000 | mucosal h | Inflamed | KLF1       | protein_cc    | chr19 | 12995237 | 12997995 | - | 1592  | 3.260143 | 0.286396 | -0.52262 | 0.168626 | -3.0993  | 0.002526 | 0.019229 | 1 |
| ENSG0000 | mucosal h | Inflamed | RP11-385J  | antisense     | chr3  | 1.78E+08 | 1.79E+08 | - | 1691  | 1.801909 | 0.587112 | 0.418966 | 0.135189 | 3.099113 | 0.002527 | 0.019234 | 1 |
| ENSG0000 | mucosal h | Inflamed | NINJ2      | protein_cc    | chr12 | 673462   | 772945   | - | 2048  | 163.0788 | 0        | -0.49326 | 0.159169 | -3.09899 | 0.002528 | 0.019234 | 1 |
| ENSG0000 | mucosal h | Inflamed | ZKSCAN1    | protein_cc    | chr7  | 99613204 | 99639312 | + | 10299 | 4317.601 | 0        | 0.669649 | 0.21609  | 3.098934 | 0.002528 | 0.019234 | 1 |
| ENSG0000 | mucosal h | Inflamed | HLA-DQB2   | protein_cc    | chr6  | 32723875 | 32731311 | - | 2028  | 241.4439 | 0.016706 | -0.7551  | 0.243684 | -3.09868 | 0.00253  | 0.019244 | 1 |
| ENSG0000 | mucosal h | Inflamed | GOLGA2B    | pseudoger     | chr12 | 1.01E+08 | 1.01E+08 | - | 10957 | 938.642  | 0        | 0.962719 | 0.310741 | 3.098137 | 0.002535 | 0.019263 | 1 |
| ENSG0000 | mucosal h | Inflamed | CTA-246H   | pseudoger     | chr22 | 25745510 | 25746289 | - | 780   | 26.39379 | 0.040573 | 0.706976 | 0.228195 | 3.098126 | 0.002535 | 0.019263 | 1 |
| ENSG0000 | mucosal h | Inflamed | hsa-mir-45 | miRNA         | chr14 | 1.06E+08 | 1.06E+08 | - | 78    | 33.10263 | 0.076372 | -1.02286 | 0.330159 | -3.09808 | 0.002535 | 0.019263 | 1 |

|          |           |          |                      |                  |          |          |   |       |          |          |          |          |          |          |          |   |
|----------|-----------|----------|----------------------|------------------|----------|----------|---|-------|----------|----------|----------|----------|----------|----------|----------|---|
| ENSG0000 | mucosal h | Inflamed | LA16c-321 antisense  | chr16            | 2989715  | 3004277  | - | 510   | 18.95704 | 0.050119 | 0.83103  | 0.268261 | 3.097844 | 0.002537 | 0.019271 | 1 |
| ENSG0000 | mucosal h | Inflamed | RPL22P19 pseudoger   | chr12            | 1.25E+08 | 1.25E+08 | - | 441   | 0.78043  | 0.797136 | 0.29467  | 0.09514  | 3.097227 | 0.002542 | 0.019302 | 1 |
| ENSG0000 | mucosal h | Inflamed | CCDC162P pseudoger   | chr6             | 1.1E+08  | 1.1E+08  | + | 3773  | 206.8759 | 0        | 1.066021 | 0.344277 | 3.096405 | 0.002548 | 0.019345 | 1 |
| ENSG0000 | mucosal h | Inflamed | CLCF1                | protein_cc chr11 | 67131639 | 67141648 | - | 1986  | 301.3461 | 0        | -0.66215 | 0.213873 | -3.09599 | 0.002551 | 0.019364 | 1 |
| ENSG0000 | mucosal h | Inflamed | EFCAB4A              | protein_cc chr11 | 826144   | 831991   | + | 3913  | 1949.974 | 0        | 0.462111 | 0.149318 | 3.094802 | 0.002561 | 0.019429 | 1 |
| ENSG0000 | mucosal h | Inflamed | RP11-452L lincRNA    | chr16            | 31460856 | 31464814 | - | 449   | 37.52267 | 0.004773 | 0.547029 | 0.176764 | 3.094688 | 0.002562 | 0.01943  | 1 |
| ENSG0000 | mucosal h | Inflamed | RP11-5711 prime_ov   | chr12            | 58117544 | 58119448 | - | 1905  | 30.95465 | 0.019093 | -0.61235 | 0.197886 | -3.09447 | 0.002563 | 0.019438 | 1 |
| ENSG0000 | mucosal h | Inflamed | SULT2B1              | protein_cc chr19 | 49055332 | 49102682 | + | 2822  | 156.2172 | 0.002387 | -0.97881 | 0.316321 | -3.09437 | 0.002564 | 0.019438 | 1 |
| ENSG0000 | mucosal h | Inflamed | ING5                 | protein_cc chr2  | 2.43E+08 | 2.43E+08 | + | 8200  | 1123.033 | 0        | 0.387511 | 0.125253 | 3.093834 | 0.002568 | 0.019465 | 1 |
| ENSG0000 | mucosal h | Inflamed | SIK1                 | protein_cc chr21 | 44834395 | 44847008 | - | 4886  | 2234.148 | 0        | -0.9575  | 0.309505 | -3.09366 | 0.00257  | 0.019469 | 1 |
| ENSG0000 | mucosal h | Inflamed | CKLF                 | protein_cc chr16 | 66586466 | 66600154 | + | 1161  | 275.2196 | 0        | -0.4729  | 0.152878 | -3.0933  | 0.002573 | 0.019481 | 1 |
| ENSG0000 | mucosal h | Inflamed | GNE                  | protein_cc chr9  | 36214438 | 36277053 | - | 5477  | 4901.272 | 0        | 0.701069 | 0.226642 | 3.093283 | 0.002573 | 0.019481 | 1 |
| ENSG0000 | mucosal h | Inflamed | BEND7                | protein_cc chr10 | 13480484 | 13570974 | - | 9815  | 719.2291 | 0        | 0.569308 | 0.184137 | 3.091768 | 0.002585 | 0.019561 | 1 |
| ENSG0000 | mucosal h | Inflamed | RP11-475C lincRNA    | chr1             | 84041459 | 84326706 | - | 5425  | 3.252983 | 0.295943 | 0.492413 | 0.159269 | 3.091711 | 0.002585 | 0.019561 | 1 |
| ENSG0000 | mucosal h | Inflamed | SNORA31              | snoRNA chr13     | 45910449 | 45910582 | - | 134   | 5.451074 | 0.126492 | 0.533743 | 0.17264  | 3.091656 | 0.002586 | 0.019561 | 1 |
| ENSG0000 | mucosal h | Inflamed | DUSP8                | protein_cc chr11 | 1575274  | 1593150  | - | 4616  | 1430.2   | 0        | 0.568717 | 0.183971 | 3.091336 | 0.002588 | 0.019575 | 1 |
| ENSG0000 | mucosal h | Inflamed | CTB-102L5 sense_intr | chr19            | 38690476 | 38691574 | + | 432   | 7.016706 | 0.128878 | 0.580102 | 0.187695 | 3.090661 | 0.002594 | 0.01961  | 1 |
| ENSG0000 | mucosal h | Inflamed | RP11-299C antisense  | chr15            | 1.02E+08 | 1.02E+08 | + | 2590  | 11.59666 | 0.071599 | 0.666533 | 0.215704 | 3.090034 | 0.002599 | 0.019642 | 1 |
| ENSG0000 | mucosal h | Inflamed | RP11-466A sense_intr | chr17            | 30836972 | 30850442 | - | 927   | 15.5179  | 0.0358   | 0.625545 | 0.202446 | 3.089939 | 0.002599 | 0.019642 | 1 |
| ENSG0000 | mucosal h | Inflamed | C21orf49             | protein_cc chr21 | 34144411 | 34266043 | + | 3503  | 24.38663 | 0.009547 | 0.532702 | 0.172419 | 3.089582 | 0.002602 | 0.019658 | 1 |
| ENSG0000 | mucosal h | Inflamed | CTD-2260 antisense   | chr5             | 96140056 | 96141808 | + | 569   | 1.687351 | 0.620525 | 0.404742 | 0.131012 | 3.089358 | 0.002604 | 0.019666 | 1 |
| ENSG0000 | mucosal h | Inflamed | PADI1                | protein_cc chr1  | 17531621 | 17572500 | + | 5061  | 30.24582 | 0.023866 | 0.86487  | 0.279997 | 3.088857 | 0.002608 | 0.019686 | 1 |
| ENSG0000 | mucosal h | Inflamed | MX2                  | protein_cc chr21 | 42733870 | 42781317 | + | 13175 | 902.3222 | 0        | -0.73318 | 0.237365 | -3.08884 | 0.002608 | 0.019686 | 1 |
| ENSG0000 | mucosal h | Inflamed | CRYM                 | protein_cc chr16 | 21250195 | 21314404 | - | 3782  | 249.821  | 0.00716  | 0.886958 | 0.287237 | 3.087892 | 0.002616 | 0.019737 | 1 |
| ENSG0000 | mucosal h | Inflamed | ST6GALNA             | protein_cc chr17 | 74620843 | 74639920 | - | 3448  | 15561.72 | 0        | 0.893602 | 0.289534 | 3.086342 | 0.002628 | 0.019826 | 1 |
| ENSG0000 | mucosal h | Inflamed | ACSS2                | protein_cc chr20 | 33459949 | 33515769 | + | 5389  | 8883.496 | 0        | 0.568033 | 0.184054 | 3.086227 | 0.002629 | 0.019827 | 1 |
| ENSG0000 | mucosal h | Inflamed | DGKQ                 | protein_cc chr4  | 952675   | 980683   | - | 4970  | 3332.334 | 0        | 0.449634 | 0.1457   | 3.086033 | 0.002631 | 0.019833 | 1 |
| ENSG0000 | mucosal h | Inflamed | GASS-AS1 antisense   | chr1             | 1.74E+08 | 1.74E+08 | + | 694   | 24.22434 | 0.011933 | 0.469101 | 0.15202  | 3.085783 | 0.002633 | 0.019838 | 1 |
| ENSG0000 | mucosal h | Inflamed | C1orf54              | protein_cc chr1  | 1.5E+08  | 1.5E+08  | + | 1351  | 193.7852 | 0        | -0.45075 | 0.146077 | -3.0857  | 0.002633 | 0.019838 | 1 |
| ENSG0000 | mucosal h | Inflamed | RP11-130L lincRNA    | chr2             | 20786008 | 20786446 | - | 439   | 3.713604 | 0.27685  | 0.534265 | 0.173144 | 3.085674 | 0.002633 | 0.019838 | 1 |
| ENSG0000 | mucosal h | Inflamed | ABCC6P2 pseudoger    | chr16            | 14914649 | 14918563 | - | 1088  | 42.11456 | 0.011933 | 0.711255 | 0.230547 | 3.085072 | 0.002638 | 0.019869 | 1 |
| ENSG0000 | mucosal h | Inflamed | P2RY10               | protein_cc chrX  | 78200829 | 78217451 | + | 1803  | 152.747  | 0.002387 | -0.84276 | 0.273207 | -3.0847  | 0.002641 | 0.01988  | 1 |
| ENSG0000 | mucosal h | Inflamed | AC020907 pseudoger   | chr19            | 35628549 | 35630484 | - | 1934  | 2.188544 | 0.556086 | 0.455115 | 0.147543 | 3.084629 | 0.002642 | 0.01988  | 1 |
| ENSG0000 | mucosal h | Inflamed | RAB39B               | protein_cc chrX  | 1.54E+08 | 1.54E+08 | - | 3505  | 79.8043  | 0.009547 | -0.80494 | 0.260961 | -3.08451 | 0.002643 | 0.01988  | 1 |
| ENSG0000 | mucosal h | Inflamed | NXPE1                | protein_cc chr11 | 1.14E+08 | 1.14E+08 | - | 4317  | 2923.804 | 0.004773 | 1.518006 | 0.492138 | 3.084513 | 0.002643 | 0.01988  | 1 |
| ENSG0000 | mucosal h | Inflamed | C17orf50             | protein_cc chr17 | 34087916 | 34092098 | + | 1063  | 1.53222  | 0.591885 | 0.32922  | 0.106741 | 3.084282 | 0.002645 | 0.019888 | 1 |
| ENSG0000 | mucosal h | Inflamed | HSD3B1               | protein_cc chr1  | 1.2E+08  | 1.2E+08  | + | 2447  | 14.34606 | 0.355609 | 0.984949 | 0.319358 | 3.084157 | 0.002646 | 0.01989  | 1 |
| ENSG0000 | mucosal h | Inflamed | CTD-2006 lincRNA     | chr17            | 72595979 | 72603368 | + | 3602  | 16.56563 | 0.083532 | -0.84167 | 0.272928 | -3.08385 | 0.002648 | 0.019903 | 1 |
| ENSG0000 | mucosal h | Inflamed | C12orf77             | protein_cc chr12 | 25146358 | 25150453 | - | 2474  | 1.75179  | 0.656325 | -0.53362 | 0.173077 | -3.08313 | 0.002654 | 0.019942 | 1 |
| ENSG0000 | mucosal h | Inflamed | GJA9                 | protein_cc chr1  | 39330175 | 39347289 | - | 3250  | 1.653938 | 0.582339 | 0.511681 | 0.165968 | 3.083004 | 0.002655 | 0.019944 | 1 |

|          |           |          |           |                  |          |          |   |       |          |          |          |          |          |          |          |   |
|----------|-----------|----------|-----------|------------------|----------|----------|---|-------|----------|----------|----------|----------|----------|----------|----------|---|
| ENSG0000 | mucosal h | Inflamed | CCDC71L   | protein_cc chr7  | 1.06E+08 | 1.06E+08 | - | 4232  | 1253.31  | 0        | -0.60153 | 0.19515  | -3.0824  | 0.00266  | 0.019974 | 1 |
| ENSG0000 | mucosal h | Inflamed | ADCY9     | protein_cc chr16 | 4003388  | 4166186  | - | 10358 | 2802.158 | 0        | 0.517787 | 0.167986 | 3.082323 | 0.002661 | 0.019974 | 1 |
| ENSG0000 | mucosal h | Inflamed | ERMAP     | protein_cc chr1  | 43282795 | 43310660 | + | 4631  | 686      | 0        | 0.421075 | 0.136618 | 3.082133 | 0.002662 | 0.019977 | 1 |
| ENSG0000 | mucosal h | Inflamed | RHOV      | protein_cc chr15 | 41164412 | 41166487 | - | 1705  | 155.7351 | 0.002387 | 0.704681 | 0.228643 | 3.082014 | 0.002663 | 0.019977 | 1 |
| ENSG0000 | mucosal h | Inflamed | COL7A1    | protein_cc chr3  | 48601506 | 48632700 | - | 11071 | 3527.107 | 0        | -1.30548 | 0.423583 | -3.082   | 0.002663 | 0.019977 | 1 |
| ENSG0000 | mucosal h | Inflamed | ALDH4A1   | protein_cc chr1  | 19197926 | 19229275 | - | 3687  | 422.2697 | 0        | -0.38903 | 0.126241 | -3.08162 | 0.002666 | 0.019994 | 1 |
| ENSG0000 | mucosal h | Inflamed | IDH2      | protein_cc chr15 | 90626277 | 90645736 | - | 2814  | 8242.411 | 0        | -0.37053 | 0.120244 | -3.08151 | 0.002667 | 0.019995 | 1 |
| ENSG0000 | mucosal h | Inflamed | ADAMTS9   | antisense chr3   | 64547014 | 64573878 | + | 4417  | 4.379475 | 0.374702 | 0.810832 | 0.263153 | 3.081217 | 0.00267  | 0.020007 | 1 |
| ENSG0000 | mucosal h | Inflamed | CARD11    | protein_cc chr7  | 2945775  | 3083579  | - | 4707  | 930.8234 | 0        | -0.72945 | 0.236791 | -3.08057 | 0.002675 | 0.020041 | 1 |
| ENSG0000 | mucosal h | Inflamed | ZNF662    | protein_cc chr3  | 42947223 | 42960825 | + | 6762  | 277.6062 | 0        | 0.895192 | 0.290664 | 3.079813 | 0.002681 | 0.020082 | 1 |
| ENSG0000 | mucosal h | Inflamed | TMEM170   | protein_cc chr16 | 75476952 | 75499395 | - | 5572  | 1567.919 | 0        | 0.601384 | 0.195279 | 3.079621 | 0.002683 | 0.020088 | 1 |
| ENSG0000 | mucosal h | Inflamed | TINAG     | protein_cc chr6  | 54172657 | 54254950 | + | 2155  | 259.7589 | 0.009547 | 0.808688 | 0.262747 | 3.077816 | 0.002698 | 0.020194 | 1 |
| ENSG0000 | mucosal h | Inflamed | LINC00866 | lincRNA chr10    | 99588235 | 99609555 | - | 418   | 4.186158 | 0.436754 | 0.672301 | 0.218457 | 3.0775   | 0.0027   | 0.020207 | 1 |
| ENSG0000 | mucosal h | Inflamed | SLC35F6   | protein_cc chr2  | 26987152 | 27004099 | + | 3902  | 2279.37  | 0        | -0.29352 | 0.095386 | -3.07719 | 0.002703 | 0.02022  | 1 |
| ENSG0000 | mucosal h | Inflamed | RP4-569M  | antisense chr20  | 45981305 | 45983377 | + | 1809  | 3.121718 | 0.295943 | -0.58116 | 0.188878 | -3.0769  | 0.002705 | 0.020233 | 1 |
| ENSG0000 | mucosal h | Inflamed | PLVAP     | protein_cc chr19 | 17462257 | 17488159 | - | 2305  | 8679.902 | 0        | -0.69131 | 0.224689 | -3.07675 | 0.002706 | 0.020237 | 1 |
| ENSG0000 | mucosal h | Inflamed | MYL6B     | protein_cc chr12 | 56546040 | 56553431 | + | 3264  | 424.9881 | 0        | -0.457   | 0.148545 | -3.0765  | 0.002708 | 0.020246 | 1 |
| ENSG0000 | mucosal h | Inflamed | SLC35F2   | protein_cc chr11 | 1.08E+08 | 1.08E+08 | - | 3717  | 1430.897 | 0        | 0.345902 | 0.112455 | 3.075921 | 0.002713 | 0.020276 | 1 |
| ENSG0000 | mucosal h | Inflamed | RP11-514F | sense_intr chr11 | 36408071 | 36409800 | + | 151   | 3.28401  | 0.396181 | 0.576575 | 0.187465 | 3.075636 | 0.002716 | 0.020285 | 1 |
| ENSG0000 | mucosal h | Inflamed | RP11-38L1 | antisense chr10  | 46951472 | 46966835 | + | 991   | 7.918854 | 0.090692 | -0.58938 | 0.191633 | -3.07559 | 0.002716 | 0.020285 | 1 |
| ENSG0000 | mucosal h | Inflamed | ACOX2     | protein_cc chr3  | 58490863 | 58523046 | - | 3859  | 430.7637 | 0        | 0.577022 | 0.187669 | 3.074676 | 0.002724 | 0.020336 | 1 |
| ENSG0000 | mucosal h | Inflamed | GCNT2     | protein_cc chr6  | 10492456 | 10629601 | + | 9052  | 314.179  | 0        | 0.775039 | 0.252089 | 3.074462 | 0.002725 | 0.020343 | 1 |
| ENSG0000 | mucosal h | Inflamed | TRIP6     | protein_cc chr7  | 1E+08    | 1E+08    | + | 2802  | 1541.821 | 0        | -0.36162 | 0.117624 | -3.07438 | 0.002726 | 0.020343 | 1 |
| ENSG0000 | mucosal h | Inflamed | AC187652  | protein_cc chr7  | 302918   | 304070   | + | 501   | 4.72315  | 0.360382 | -0.69573 | 0.226319 | -3.07412 | 0.002728 | 0.020353 | 1 |
| ENSG0000 | mucosal h | Inflamed | Y_RNA     | misc_RNA chr10   | 1.29E+08 | 1.29E+08 | + | 97    | 1.011933 | 0.73031  | 0.383706 | 0.124822 | 3.074035 | 0.002729 | 0.020353 | 1 |
| ENSG0000 | mucosal h | Inflamed | OR5G5P    | pseudoger chr11  | 56569332 | 56587184 | - | 1081  | 3.147971 | 0.534606 | 0.582034 | 0.189361 | 3.073667 | 0.002732 | 0.02037  | 1 |
| ENSG0000 | mucosal h | Inflamed | NBR2      | pseudoger chr17  | 41277627 | 41305688 | + | 2096  | 231.0811 | 0        | 0.468149 | 0.152314 | 3.073577 | 0.002733 | 0.02037  | 1 |
| ENSG0000 | mucosal h | Inflamed | RNU6-377  | snRNA chr3       | 12556205 | 12556306 | + | 102   | 1.066826 | 0.711217 | 0.393287 | 0.127976 | 3.073128 | 0.002737 | 0.020392 | 1 |
| ENSG0000 | mucosal h | Inflamed | GLRX      | protein_cc chr5  | 95087023 | 95158709 | - | 6508  | 2181.947 | 0        | -0.51083 | 0.166254 | -3.0726  | 0.002741 | 0.020419 | 1 |
| ENSG0000 | mucosal h | Inflamed | LGI2      | protein_cc chr4  | 25000469 | 25032501 | - | 6428  | 243.4081 | 0.004773 | -1.00963 | 0.328669 | -3.07189 | 0.002747 | 0.020458 | 1 |
| ENSG0000 | mucosal h | Inflamed | TAPBPL    | protein_cc chr12 | 6560856  | 6575683  | + | 3188  | 2992.63  | 0        | -0.317   | 0.103228 | -3.0709  | 0.002755 | 0.020514 | 1 |
| ENSG0000 | mucosal h | Inflamed | MPV17     | protein_cc chr2  | 27532360 | 27548547 | - | 4653  | 1054.134 | 0        | -0.24511 | 0.079819 | -3.07078 | 0.002756 | 0.020514 | 1 |
| ENSG0000 | mucosal h | Inflamed | CA14      | protein_cc chr1  | 1.5E+08  | 1.5E+08  | + | 3838  | 9.610979 | 0.105012 | 0.635525 | 0.206966 | 3.070682 | 0.002757 | 0.020514 | 1 |
| ENSG0000 | mucosal h | Inflamed | KCNJ2-AS1 | antisense chr17  | 68163102 | 68165543 | - | 2442  | 56.68735 | 0        | 0.563338 | 0.18346  | 3.070627 | 0.002758 | 0.020514 | 1 |
| ENSG0000 | mucosal h | Inflamed | LINC00667 | lincRNA chr18    | 5232875  | 5246507  | + | 6979  | 1203.196 | 0        | 0.361569 | 0.117756 | 3.070483 | 0.002759 | 0.020517 | 1 |
| ENSG0000 | mucosal h | Inflamed | FEV       | protein_cc chr2  | 2.2E+08  | 2.2E+08  | - | 2049  | 122.6062 | 0.023866 | 1.248252 | 0.406554 | 3.070324 | 0.00276  | 0.020521 | 1 |
| ENSG0000 | mucosal h | Inflamed | AL122127  | miRNA chr14      | 1.06E+08 | 1.06E+08 | - | 78    | 43.54177 | 0.052506 | -1.05939 | 0.345097 | -3.06983 | 0.002764 | 0.020546 | 1 |
| ENSG0000 | mucosal h | Inflamed | C11orf80  | protein_cc chr11 | 66511922 | 66610987 | + | 3953  | 736.3771 | 0        | -0.32711 | 0.106583 | -3.06909 | 0.002771 | 0.020587 | 1 |
| ENSG0000 | mucosal h | Inflamed | TRAPPC12  | antisense chr2   | 3485013  | 3486180  | - | 908   | 1.217184 | 0.75895  | 0.414565 | 0.135147 | 3.067503 | 0.002784 | 0.020675 | 1 |
| ENSG0000 | mucosal h | Inflamed | ZFY-AS1   | antisense chrY   | 2834885  | 2870667  | - | 796   | 1.823389 | 0.630072 | 0.38637  | 0.125956 | 3.067498 | 0.002784 | 0.020675 | 1 |

|          |           |          |                      |            |          |          |          |      |          |          |          |          |          |          |          |          |   |
|----------|-----------|----------|----------------------|------------|----------|----------|----------|------|----------|----------|----------|----------|----------|----------|----------|----------|---|
| ENSG0000 | mucosal h | Inflamed | RP11-400M antisense  | chr2       | 2.34E+08 | 2.34E+08 | -        | 2285 | 12.58711 | 0.066826 | 0.696153 | 0.226954 | 3.067379 | 0.002785 | 0.020675 | 1        |   |
| ENSG0000 | mucosal h | Inflamed | RP11-35P1 lincRNA    | chr11      | 1.18E+08 | 1.18E+08 | +        | 376  | 21.21241 | 0.047733 | 0.816453 | 0.266177 | 3.067327 | 0.002785 | 0.020675 | 1        |   |
| ENSG0000 | mucosal h | Inflamed | LPHN1                | protein_cc | chr19    | 14260750 | 14316999 | -    | 6292     | 1208.733 | 0        | 0.473393 | 0.154373 | 3.066547 | 0.002792 | 0.020718 | 1 |
| ENSG0000 | mucosal h | Inflamed | CTBP2                | protein_cc | chr10    | 1.27E+08 | 1.27E+08 | -    | 7411     | 3834.589 | 0        | 0.354153 | 0.115499 | 3.066278 | 0.002794 | 0.020724 | 1 |
| ENSG0000 | mucosal h | Inflamed | CXorf23              | protein_cc | chrX     | 19930978 | 19988416 | -    | 8630     | 462.9547 | 0        | 0.738867 | 0.240966 | 3.066271 | 0.002794 | 0.020724 | 1 |
| ENSG0000 | mucosal h | Inflamed | NGEF                 | protein_cc | chr2     | 2.34E+08 | 2.34E+08 | -    | 4687     | 1231.427 | 0        | 0.665715 | 0.217167 | 3.065451 | 0.002801 | 0.020759 | 1 |
| ENSG0000 | mucosal h | Inflamed | CTA-963H1 pseudoger  | chr22      | 31049864 | 31050801 | -        | 612  | 57.53699 | 0.002387 | 0.522129 | 0.170327 | 3.065444 | 0.002801 | 0.020759 | 1        |   |
| ENSG0000 | mucosal h | Inflamed | LANCL3               | protein_cc | chrX     | 37430822 | 37543716 | +    | 10298    | 137.3556 | 0        | 0.836178 | 0.272777 | 3.065432 | 0.002802 | 0.020759 | 1 |
| ENSG0000 | mucosal h | Inflamed | ZNF69                | protein_cc | chr19    | 11998599 | 12025144 | +    | 2931     | 210.2745 | 0        | 0.598343 | 0.195267 | 3.064233 | 0.002812 | 0.020824 | 1 |
| ENSG0000 | mucosal h | Inflamed | AK1                  | protein_cc | chr9     | 1.31E+08 | 1.31E+08 | -    | 2667     | 507.6683 | 0        | 0.565306 | 0.184494 | 3.064088 | 0.002813 | 0.020824 | 1 |
| ENSG0000 | mucosal h | Inflamed | SPG7                 | protein_cc | chr16    | 89557325 | 89624176 | +    | 10035    | 3370.764 | 0        | 0.316276 | 0.103221 | 3.064058 | 0.002813 | 0.020824 | 1 |
| ENSG0000 | mucosal h | Inflamed | KB-1410C5 lincRNA    | chr8       | 1.02E+08 | 1.02E+08 | +        | 731  | 1.085919 | 0.73031  | 0.353785 | 0.115464 | 3.064039 | 0.002814 | 0.020824 | 1        |   |
| ENSG0000 | mucosal h | Inflamed | CCR4                 | protein_cc | chr3     | 32993066 | 32997841 | +    | 3095     | 143.1742 | 0.016706 | -0.91203 | 0.297678 | -3.06381 | 0.002816 | 0.020824 | 1 |
| ENSG0000 | mucosal h | Inflamed | C12orf61             | protein_cc | chr12    | 62995531 | 62997214 | -    | 1684     | 24.07876 | 0.002387 | -0.5556  | 0.181344 | -3.06377 | 0.002816 | 0.020824 | 1 |
| ENSG0000 | mucosal h | Inflamed | FAM127C              | protein_cc | chrX     | 1.34E+08 | 1.34E+08 | -    | 2017     | 225.1313 | 0.002387 | -0.5957  | 0.194434 | -3.06376 | 0.002816 | 0.020824 | 1 |
| ENSG0000 | mucosal h | Inflamed | RP11-392E processed  | chr9       | 38542386 | 38543212 | -        | 469  | 2.243437 | 0.472554 | 0.473377 | 0.154585 | 3.06224  | 0.002829 | 0.020915 | 1        |   |
| ENSG0000 | mucosal h | Inflamed | ZNF124               | protein_cc | chr1     | 2.47E+08 | 2.47E+08 | -    | 4517     | 196.148  | 0.002387 | 0.612508 | 0.200142 | 3.060362 | 0.002845 | 0.021029 | 1 |
| ENSG0000 | mucosal h | Inflamed | ALDH18A1             | protein_cc | chr10    | 97365696 | 97416463 | -    | 3756     | 6424.585 | 0        | 0.442458 | 0.144584 | 3.060221 | 0.002846 | 0.021032 | 1 |
| ENSG0000 | mucosal h | Inflamed | RP11-18B1 lincRNA    | chr9       | 1.16E+08 | 1.16E+08 | +        | 1223 | 5.02864  | 0.529833 | -0.9381  | 0.306579 | -3.05988 | 0.002849 | 0.021048 | 1        |   |
| ENSG0000 | mucosal h | Inflamed | RAB4A                | protein_cc | chr1     | 2.29E+08 | 2.29E+08 | +    | 3297     | 1191.124 | 0        | 0.289056 | 0.094479 | 3.059478 | 0.002853 | 0.021068 | 1 |
| ENSG0000 | mucosal h | Inflamed | COLEC10              | protein_cc | chr8     | 1.2E+08  | 1.2E+08  | +    | 1670     | 13.48687 | 0.140811 | -0.92865 | 0.303551 | -3.0593  | 0.002854 | 0.02107  | 1 |
| ENSG0000 | mucosal h | Inflamed | C2orf88              | protein_cc | chr2     | 1.91E+08 | 1.91E+08 | +    | 5997     | 1764.74  | 0        | 0.824601 | 0.269542 | 3.059263 | 0.002855 | 0.02107  | 1 |
| ENSG0000 | mucosal h | Inflamed | CTD-2616J sense_intr | chr19      | 51864966 | 51868798 | -        | 473  | 15.20286 | 0.076372 | 0.668305 | 0.218487 | 3.058783 | 0.002859 | 0.021095 | 1        |   |
| ENSG0000 | mucosal h | Inflamed | SFMBT2               | protein_cc | chr10    | 7200586  | 7453450  | -    | 9955     | 945.611  | 0        | -0.63916 | 0.20898  | -3.05849 | 0.002862 | 0.021108 | 1 |
| ENSG0000 | mucosal h | Inflamed | GP6                  | protein_cc | chr19    | 55525073 | 55549632 | -    | 2703     | 10.63246 | 0.107399 | 0.65858  | 0.215355 | 3.058106 | 0.002865 | 0.021127 | 1 |
| ENSG0000 | mucosal h | Inflamed | FAM195A              | protein_cc | chr16    | 691813   | 698474   | +    | 2226     | 1572.444 | 0        | 0.459314 | 0.150205 | 3.057908 | 0.002867 | 0.021127 | 1 |
| ENSG0000 | mucosal h | Inflamed | ZNF273               | protein_cc | chr7     | 64330550 | 64391344 | +    | 8652     | 110.7685 | 0.002387 | 0.590009 | 0.192946 | 3.057894 | 0.002867 | 0.021127 | 1 |
| ENSG0000 | mucosal h | Inflamed | AC084018 lincRNA     | chr12      | 1.22E+08 | 1.22E+08 | -        | 4769 | 895.4272 | 0        | 0.631998 | 0.206683 | 3.057813 | 0.002867 | 0.021127 | 1        |   |
| ENSG0000 | mucosal h | Inflamed | MSTN                 | protein_cc | chr2     | 1.91E+08 | 1.91E+08 | -    | 2822     | 4.653938 | 0.26253  | 0.640519 | 0.209475 | 3.057739 | 0.002868 | 0.021127 | 1 |
| ENSG0000 | mucosal h | Inflamed | SH3D19               | protein_cc | chr4     | 1.52E+08 | 1.52E+08 | -    | 7789     | 4999.038 | 0        | 0.546765 | 0.178863 | 3.05689  | 0.002875 | 0.021173 | 1 |
| ENSG0000 | mucosal h | Inflamed | LYSMD2               | protein_cc | chr15    | 52015208 | 52043782 | -    | 2074     | 327.7661 | 0        | -0.42378 | 0.138634 | -3.05684 | 0.002876 | 0.021173 | 1 |
| ENSG0000 | mucosal h | Inflamed | MT-ND5               | protein_cc | chrM     | 12337    | 14148    | +    | 1812     | 559923.9 | 0        | 0.427445 | 0.139851 | 3.056438 | 0.002879 | 0.021187 | 1 |
| ENSG0000 | mucosal h | Inflamed | FNIP2                | protein_cc | chr4     | 1.6E+08  | 1.6E+08  | +    | 10868    | 2382.554 | 0        | 0.686508 | 0.224618 | 3.056335 | 0.00288  | 0.021187 | 1 |
| ENSG0000 | mucosal h | Inflamed | POLR2J4              | processed  | chr7     | 43980494 | 44058774 | -    | 6492     | 59.23389 | 0.016706 | 0.607798 | 0.198873 | 3.056208 | 0.002881 | 0.021187 | 1 |
| ENSG0000 | mucosal h | Inflamed | RP11-303C pseudoger  | chr8       | 12437796 | 12438572 | +        | 186  | 9.589499 | 0.107399 | 0.703384 | 0.230152 | 3.056169 | 0.002882 | 0.021187 | 1        |   |
| ENSG0000 | mucosal h | Inflamed | RRAGD                | protein_cc | chr6     | 90074355 | 90121989 | -    | 5072     | 230.2148 | 0        | -0.46391 | 0.151796 | -3.05617 | 0.002882 | 0.021187 | 1 |
| ENSG0000 | mucosal h | Inflamed | RP11-801F antisense  | chr2       | 2.09E+08 | 2.09E+08 | -        | 564  | 64.93079 | 0.009547 | 0.904482 | 0.29598  | 3.055888 | 0.002884 | 0.021199 | 1        |   |
| ENSG0000 | mucosal h | Inflamed | LINC00537 pseudoger  | chr9       | 68413482 | 68414196 | -        | 715  | 13.94988 | 0.078759 | -0.71647 | 0.234466 | -3.05575 | 0.002885 | 0.0212   | 1        |   |
| ENSG0000 | mucosal h | Inflamed | GFOD1                | protein_cc | chr6     | 13358062 | 13487894 | -    | 10686    | 686.7542 | 0        | 0.529389 | 0.173248 | 3.055675 | 0.002886 | 0.0212   | 1 |
| ENSG0000 | mucosal h | Inflamed | SP6                  | protein_cc | chr17    | 45922279 | 45933240 | -    | 4070     | 554.0549 | 0        | -0.65671 | 0.214931 | -3.05545 | 0.002888 | 0.021205 | 1 |

|          |           |          |           |            |       |          |          |   |       |          |          |          |          |          |          |          |   |
|----------|-----------|----------|-----------|------------|-------|----------|----------|---|-------|----------|----------|----------|----------|----------|----------|----------|---|
| ENSG0000 | mucosal h | Inflamed | POU2F3    | protein_cc | chr11 | 1.2E+08  | 1.2E+08  | + | 6645  | 98.00239 | 0.009547 | 0.889504 | 0.291124 | 3.055417 | 0.002888 | 0.021205 | 1 |
| ENSG0000 | mucosal h | Inflamed | UBTFL6    | pseudoger  | chr2  | 98253060 | 98254266 | - | 1207  | 3.372315 | 0.398568 | -0.59718 | 0.195473 | -3.05503 | 0.002892 | 0.021224 | 1 |
| ENSG0000 | mucosal h | Inflamed | ZNF571    | protein_cc | chr19 | 38045684 | 38085673 | - | 5938  | 72.88544 | 0.002387 | 0.503629 | 0.164879 | 3.054539 | 0.002896 | 0.02125  | 1 |
| ENSG0000 | mucosal h | Inflamed | TMPRSS3   | protein_cc | chr21 | 43791999 | 43816955 | - | 5660  | 148.2912 | 0        | -0.64696 | 0.211819 | -3.05431 | 0.002898 | 0.021255 | 1 |
| ENSG0000 | mucosal h | Inflamed | XXbac-B47 | antisense  | chr22 | 18559293 | 18561650 | - | 2235  | 201.4511 | 0        | 0.718616 | 0.235282 | 3.054277 | 0.002898 | 0.021255 | 1 |
| ENSG0000 | mucosal h | Inflamed | LTF       | protein_cc | chr3  | 46477136 | 46526724 | - | 4247  | 801.7924 | 0        | -1.24327 | 0.407194 | -3.05325 | 0.002908 | 0.021316 | 1 |
| ENSG0000 | mucosal h | Inflamed | HCN2      | protein_cc | chr19 | 589893   | 617159   | + | 3408  | 37.41289 | 0.016706 | -0.66808 | 0.21883  | -3.05299 | 0.00291  | 0.021327 | 1 |
| ENSG0000 | mucosal h | Inflamed | ATG9B     | protein_cc | chr7  | 1.51E+08 | 1.51E+08 | - | 6404  | 32.48687 | 0.016706 | -0.6716  | 0.220014 | -3.05254 | 0.002914 | 0.02135  | 1 |
| ENSG0000 | mucosal h | Inflamed | RP11-98L5 | lincRNA    | chr9  | 1.38E+08 | 1.38E+08 | + | 2746  | 2.155131 | 0.797136 | -0.55886 | 0.183116 | -3.05195 | 0.002919 | 0.021375 | 1 |
| ENSG0000 | mucosal h | Inflamed | KRT6C     | protein_cc | chr12 | 52862300 | 52867569 | - | 2896  | 4.307876 | 0.637232 | -0.93913 | 0.307719 | -3.05193 | 0.002919 | 0.021375 | 1 |
| ENSG0000 | mucosal h | Inflamed | TNFRSF1B  | protein_cc | chr1  | 12227060 | 12269285 | + | 3766  | 5794.85  | 0        | -0.60015 | 0.196648 | -3.05189 | 0.00292  | 0.021375 | 1 |
| ENSG0000 | mucosal h | Inflamed | KLC4      | protein_cc | chr6  | 43008515 | 43042837 | + | 6421  | 3547.668 | 0        | 0.478209 | 0.156704 | 3.051674 | 0.002921 | 0.021382 | 1 |
| ENSG0000 | mucosal h | Inflamed | FBXO32    | protein_cc | chr8  | 1.25E+08 | 1.25E+08 | - | 7395  | 1699.215 | 0        | 0.478056 | 0.156683 | 3.051096 | 0.002927 | 0.021414 | 1 |
| ENSG0000 | mucosal h | Inflamed | ZFP36L2   | protein_cc | chr2  | 43449541 | 43453748 | - | 3696  | 14018.37 | 0        | 0.470204 | 0.154115 | 3.051001 | 0.002927 | 0.021414 | 1 |
| ENSG0000 | mucosal h | Inflamed | DNAH2     | protein_cc | chr17 | 7620672  | 7737062  | + | 17231 | 95.73508 | 0.002387 | -0.68847 | 0.225675 | -3.0507  | 0.00293  | 0.021428 | 1 |
| ENSG0000 | mucosal h | Inflamed | AP006621  | antisense  | chr11 | 781645   | 782105   | + | 284   | 21.27924 | 0.059666 | 0.675852 | 0.221555 | 3.050497 | 0.002932 | 0.021435 | 1 |
| ENSG0000 | mucosal h | Inflamed | IGLV3-22  | IG_V_gene  | chr22 | 23046750 | 23047307 | + | 409   | 14.08592 | 0.424821 | -1.06809 | 0.350149 | -3.05038 | 0.002933 | 0.021437 | 1 |
| ENSG0000 | mucosal h | Inflamed | METTL7B   | protein_cc | chr12 | 56075330 | 56078395 | + | 1506  | 1088.148 | 0        | 0.675494 | 0.221473 | 3.050003 | 0.002936 | 0.021456 | 1 |
| ENSG0000 | mucosal h | Inflamed | RP11-333C | lincRNA    | chr2  | 12855541 | 12856353 | + | 813   | 2.801909 | 0.451074 | -0.6249  | 0.204905 | -3.0497  | 0.002939 | 0.021469 | 1 |
| ENSG0000 | mucosal h | Inflamed | AC010149  | antisense  | chr2  | 2.31E+08 | 2.31E+08 | - | 692   | 5.897375 | 0.238663 | -0.65905 | 0.216143 | -3.04914 | 0.002944 | 0.021495 | 1 |
| ENSG0000 | mucosal h | Inflamed | CTD-2015f | pseudoger  | chr5  | 79796151 | 79797219 | + | 752   | 0.842482 | 0.787589 | 0.3506   | 0.114987 | 3.049045 | 0.002945 | 0.021495 | 1 |
| ENSG0000 | mucosal h | Inflamed | ZNF469    | protein_cc | chr16 | 88493879 | 88507165 | + | 13287 | 537.9976 | 0.002387 | -1.02561 | 0.336372 | -3.04903 | 0.002945 | 0.021495 | 1 |
| ENSG0000 | mucosal h | Inflamed | FAM98C    | protein_cc | chr19 | 38893775 | 38899728 | + | 4598  | 717.7613 | 0        | 0.272967 | 0.089541 | 3.048531 | 0.00295  | 0.021522 | 1 |
| ENSG0000 | mucosal h | Inflamed | NCKAP1L   | protein_cc | chr12 | 54891495 | 54937726 | + | 6300  | 1969.05  | 0        | -0.62884 | 0.206337 | -3.04764 | 0.002958 | 0.021568 | 1 |
| ENSG0000 | mucosal h | Inflamed | RP11-24F1 | antisense  | chr3  | 46406446 | 46448550 | - | 656   | 50.59189 | 0        | -0.46607 | 0.152931 | -3.04758 | 0.002958 | 0.021568 | 1 |
| ENSG0000 | mucosal h | Inflamed | FAHD1     | protein_cc | chr16 | 1876968  | 1890208  | + | 3006  | 938.148  | 0        | 0.349444 | 0.114667 | 3.047469 | 0.002959 | 0.021568 | 1 |
| ENSG0000 | mucosal h | Inflamed | TMEM38A   | protein_cc | chr19 | 16771938 | 16800840 | + | 3005  | 205.7971 | 0        | 0.442898 | 0.145341 | 3.047299 | 0.002961 | 0.021568 | 1 |
| ENSG0000 | mucosal h | Inflamed | CTB-31N1f | pseudoger  | chr16 | 21544266 | 21561694 | - | 576   | 2.24105  | 0.486874 | 0.493882 | 0.162073 | 3.047278 | 0.002961 | 0.021568 | 1 |
| ENSG0000 | mucosal h | Inflamed | AC023490  | lincRNA    | chr22 | 20378814 | 20380440 | + | 1026  | 12.20764 | 0.038186 | 0.488383 | 0.160273 | 3.04719  | 0.002962 | 0.021568 | 1 |
| ENSG0000 | mucosal h | Inflamed | RNU6-116  | snRNA      | chr9  | 99018498 | 99018601 | - | 104   | 1.224344 | 0.720764 | 0.345797 | 0.113482 | 3.04716  | 0.002962 | 0.021568 | 1 |
| ENSG0000 | mucosal h | Inflamed | CLN8      | protein_cc | chr8  | 1703944  | 1734738  | + | 8111  | 1151.329 | 0        | 0.283566 | 0.093061 | 3.047094 | 0.002962 | 0.021568 | 1 |
| ENSG0000 | mucosal h | Inflamed | RP11-597f | antisense  | chr17 | 12893466 | 12893927 | - | 335   | 1.369928 | 0.668258 | 0.362068 | 0.118833 | 3.046856 | 0.002965 | 0.021578 | 1 |
| ENSG0000 | mucosal h | Inflamed | NET1      | protein_cc | chr10 | 5454514  | 5500426  | + | 4194  | 4350.234 | 0        | 0.645482 | 0.21186  | 3.04674  | 0.002966 | 0.021579 | 1 |
| ENSG0000 | mucosal h | Inflamed | CCL7      | protein_cc | chr17 | 32597240 | 32599261 | + | 863   | 20.13604 | 0.0358   | -0.74228 | 0.243662 | -3.04637 | 0.002969 | 0.021596 | 1 |
| ENSG0000 | mucosal h | Inflamed | FAM19A5   | protein_cc | chr22 | 48885272 | 49246724 | + | 3173  | 83.83532 | 0.004773 | -0.70779 | 0.232343 | -3.04631 | 0.00297  | 0.021596 | 1 |
| ENSG0000 | mucosal h | Inflamed | CDCA3     | protein_cc | chr12 | 6953957  | 6961230  | - | 5653  | 506.6038 | 0        | -0.39497 | 0.129659 | -3.04621 | 0.00297  | 0.021596 | 1 |
| ENSG0000 | mucosal h | Inflamed | CXCL13    | protein_cc | chr4  | 78432907 | 78532988 | + | 1431  | 976.1026 | 0.031026 | -1.6938  | 0.556188 | -3.04537 | 0.002978 | 0.021644 | 1 |
| ENSG0000 | mucosal h | Inflamed | TMEM141   | protein_cc | chr9  | 1.4E+08  | 1.4E+08  | + | 1443  | 2272.165 | 0        | 0.499632 | 0.164067 | 3.045299 | 0.002979 | 0.021644 | 1 |
| ENSG0000 | mucosal h | Inflamed | SBSN      | protein_cc | chr19 | 36014269 | 36019253 | - | 1986  | 53.75418 | 0.396181 | -1.71708 | 0.563862 | -3.04521 | 0.002979 | 0.021644 | 1 |
| ENSG0000 | mucosal h | Inflamed | COL4A2    | protein_cc | chr13 | 1.11E+08 | 1.11E+08 | + | 7885  | 20230.32 | 0        | -0.8053  | 0.264485 | -3.0448  | 0.002983 | 0.021664 | 1 |

|          |           |          |           |                  |          |          |   |       |          |          |          |          |          |          |          |   |
|----------|-----------|----------|-----------|------------------|----------|----------|---|-------|----------|----------|----------|----------|----------|----------|----------|---|
| ENSG0000 | mucosal h | Inflamed | CLPB      | protein_cc chr11 | 72003469 | 72145692 | - | 4232  | 492.0883 | 0        | -0.32563 | 0.10695  | -3.04473 | 0.002984 | 0.021664 | 1 |
| ENSG0000 | mucosal h | Inflamed | PPARA     | protein_cc chr22 | 46546424 | 46639653 | + | 12069 | 3881.427 | 0        | 0.575484 | 0.189026 | 3.04447  | 0.002986 | 0.021675 | 1 |
| ENSG0000 | mucosal h | Inflamed | PPP1R9A   | protein_cc chr7  | 94536514 | 94925727 | + | 11151 | 376.8258 | 0        | 0.791576 | 0.260067 | 3.043744 | 0.002993 | 0.021717 | 1 |
| ENSG0000 | mucosal h | Inflamed | MRRF      | protein_cc chr9  | 1.25E+08 | 1.25E+08 | + | 3162  | 959.9952 | 0        | 0.384965 | 0.126483 | 3.043614 | 0.002994 | 0.021719 | 1 |
| ENSG0000 | mucosal h | Inflamed | RP11-624L | antisense chr15  | 39157523 | 39719396 | - | 3242  | 4.336516 | 0.267303 | 0.581661 | 0.191131 | 3.043251 | 0.002997 | 0.021735 | 1 |
| ENSG0000 | mucosal h | Inflamed | ARHGAP4   | protein_cc chrX  | 1.53E+08 | 1.53E+08 | - | 5580  | 2951.628 | 0        | -0.48818 | 0.160419 | -3.04319 | 0.002998 | 0.021735 | 1 |
| ENSG0000 | mucosal h | Inflamed | GSN       | protein_cc chr9  | 1.24E+08 | 1.24E+08 | + | 11097 | 32104.5  | 0        | 0.458353 | 0.150671 | 3.042081 | 0.003008 | 0.021802 | 1 |
| ENSG0000 | mucosal h | Inflamed | RP11-532F | antisense chr15  | 41128006 | 41136585 | - | 1239  | 407.327  | 0        | 0.546668 | 0.179712 | 3.041915 | 0.003009 | 0.021807 | 1 |
| ENSG0000 | mucosal h | Inflamed | MIR10A    | sense_intr chr17 | 46656992 | 46659621 | - | 2630  | 12.68974 | 0.093079 | 0.688695 | 0.22644  | 3.041403 | 0.003014 | 0.021835 | 1 |
| ENSG0000 | mucosal h | Inflamed | STC2      | protein_cc chr5  | 1.73E+08 | 1.73E+08 | - | 6128  | 142.9714 | 0.01432  | -1.03313 | 0.339752 | -3.04083 | 0.003019 | 0.021863 | 1 |
| ENSG0000 | mucosal h | Inflamed | DLG2      | protein_cc chr11 | 83166055 | 85338966 | - | 16089 | 28.58234 | 0.026253 | 0.722552 | 0.237619 | 3.040804 | 0.00302  | 0.021863 | 1 |
| ENSG0000 | mucosal h | Inflamed | IVD       | protein_cc chr15 | 40697686 | 40728146 | + | 6855  | 3140.897 | 0        | 0.3316   | 0.10906  | 3.040542 | 0.003022 | 0.021874 | 1 |
| ENSG0000 | mucosal h | Inflamed | IGLON5    | protein_cc chr19 | 51815102 | 51833608 | + | 2606  | 11.98329 | 0.164678 | -0.79615 | 0.261872 | -3.04022 | 0.003025 | 0.021889 | 1 |
| ENSG0000 | mucosal h | Inflamed | ICOS      | protein_cc chr2  | 2.05E+08 | 2.05E+08 | + | 2645  | 108.3365 | 0.002387 | -0.89653 | 0.294942 | -3.03968 | 0.00303  | 0.021919 | 1 |
| ENSG0000 | mucosal h | Inflamed | RPS10P7   | lincRNA chr1     | 2.01E+08 | 2.01E+08 | + | 2329  | 87.69451 | 0        | 0.517653 | 0.170303 | 3.0396   | 0.003031 | 0.021919 | 1 |
| ENSG0000 | mucosal h | Inflamed | INSL5     | protein_cc chr1  | 67263424 | 67266939 | - | 715   | 441.7613 | 0.076372 | 2.076694 | 0.683381 | 3.038854 | 0.003037 | 0.021962 | 1 |
| ENSG0000 | mucosal h | Inflamed | SCAP      | protein_cc chr3  | 47455203 | 47518616 | - | 6282  | 5458.253 | 0        | 0.334892 | 0.110219 | 3.038418 | 0.003041 | 0.021985 | 1 |
| ENSG0000 | mucosal h | Inflamed | LYPD8     | protein_cc chr1  | 2.49E+08 | 2.49E+08 | - | 435   | 2580.933 | 0.00716  | 1.523723 | 0.501546 | 3.038049 | 0.003045 | 0.022004 | 1 |
| ENSG0000 | mucosal h | Inflamed | CPM       | protein_cc chr12 | 69235977 | 69365350 | - | 7535  | 2253.964 | 0        | 0.522322 | 0.171982 | 3.037082 | 0.003054 | 0.022062 | 1 |
| ENSG0000 | mucosal h | Inflamed | PID1      | protein_cc chr2  | 2.3E+08  | 2.3E+08  | - | 3364  | 1357.995 | 0        | 0.456481 | 0.150348 | 3.036159 | 0.003062 | 0.022118 | 1 |
| ENSG0000 | mucosal h | Inflamed | ELK3      | protein_cc chr12 | 96588160 | 96663613 | + | 4648  | 1385.322 | 0        | -0.67657 | 0.22285  | -3.03598 | 0.003064 | 0.022124 | 1 |
| ENSG0000 | mucosal h | Inflamed | HIF1A     | protein_cc chr14 | 62162231 | 62214976 | + | 5150  | 5049.045 | 0        | -0.69777 | 0.229896 | -3.03514 | 0.003072 | 0.022174 | 1 |
| ENSG0000 | mucosal h | Inflamed | KIAA0141  | protein_cc chr5  | 1.41E+08 | 1.41E+08 | + | 6047  | 2960.797 | 0        | 0.212668 | 0.07007  | 3.035055 | 0.003073 | 0.022174 | 1 |
| ENSG0000 | mucosal h | Inflamed | SLC35B1   | protein_cc chr17 | 47778305 | 47786376 | - | 5889  | 1486.566 | 0        | -0.34545 | 0.113836 | -3.03465 | 0.003076 | 0.022191 | 1 |
| ENSG0000 | mucosal h | Inflamed | PPP1R36   | protein_cc chr14 | 65016620 | 65056098 | + | 3093  | 117.1432 | 0        | 0.556313 | 0.183322 | 3.034618 | 0.003077 | 0.022191 | 1 |
| ENSG0000 | mucosal h | Inflamed | SPPL3     | protein_cc chr12 | 1.21E+08 | 1.21E+08 | - | 6672  | 2437.909 | 0        | 0.290551 | 0.09575  | 3.034464 | 0.003078 | 0.022195 | 1 |
| ENSG0000 | mucosal h | Inflamed | PTPN6     | protein_cc chr12 | 7055631  | 7070479  | + | 5009  | 3466.833 | 0        | -0.40689 | 0.134102 | -3.0342  | 0.003081 | 0.022207 | 1 |
| ENSG0000 | mucosal h | Inflamed | SH2D7     | protein_cc chr15 | 78370150 | 78397251 | + | 2881  | 182.9618 | 0.023866 | 1.202504 | 0.396461 | 3.033097 | 0.003091 | 0.022273 | 1 |
| ENSG0000 | mucosal h | Inflamed | LPAR5     | protein_cc chr12 | 6728001  | 6745613  | - | 3258  | 1411.823 | 0        | 0.437505 | 0.144248 | 3.033005 | 0.003092 | 0.022273 | 1 |
| ENSG0000 | mucosal h | Inflamed | RP11-310E | antisense chr10  | 96988000 | 96990901 | - | 663   | 1.205251 | 0.658711 | 0.403288 | 0.132972 | 3.032887 | 0.003093 | 0.022273 | 1 |
| ENSG0000 | mucosal h | Inflamed | BEST1     | protein_cc chr11 | 61717293 | 61732987 | + | 8930  | 294.3795 | 0        | -0.75983 | 0.250534 | -3.03286 | 0.003093 | 0.022273 | 1 |
| ENSG0000 | mucosal h | Inflamed | CRB1      | protein_cc chr1  | 1.97E+08 | 1.97E+08 | + | 13066 | 1.391408 | 0.675418 | 0.368284 | 0.121448 | 3.032436 | 0.003097 | 0.022285 | 1 |
| ENSG0000 | mucosal h | Inflamed | HSPA1B    | protein_cc chr6  | 31795512 | 31798031 | + | 2520  | 2743.89  | 0        | 0.458351 | 0.151152 | 3.032383 | 0.003098 | 0.022285 | 1 |
| ENSG0000 | mucosal h | Inflamed | CCDC115   | protein_cc chr2  | 1.31E+08 | 1.31E+08 | - | 3782  | 1120.193 | 0        | 0.263218 | 0.086802 | 3.032381 | 0.003098 | 0.022285 | 1 |
| ENSG0000 | mucosal h | Inflamed | ETHE1     | protein_cc chr19 | 44010871 | 44031396 | - | 1604  | 10187.15 | 0        | 0.579299 | 0.191042 | 3.032313 | 0.003098 | 0.022285 | 1 |
| ENSG0000 | mucosal h | Inflamed | RP1-309F2 | antisense chr20  | 57451647 | 57452036 | - | 390   | 3.052506 | 0.400955 | 0.557676 | 0.183958 | 3.031541 | 0.003106 | 0.022332 | 1 |
| ENSG0000 | mucosal h | Inflamed | ZFYVE9    | protein_cc chr1  | 52608046 | 52812358 | + | 5529  | 684.8019 | 0        | 0.609308 | 0.20101  | 3.031226 | 0.003108 | 0.022339 | 1 |
| ENSG0000 | mucosal h | Inflamed | ESRRA     | protein_cc chr11 | 64073044 | 64084215 | + | 3030  | 5739.764 | 0        | 0.363938 | 0.120065 | 3.031183 | 0.003109 | 0.022339 | 1 |
| ENSG0000 | mucosal h | Inflamed | TAS1R1    | protein_cc chr1  | 6615241  | 6639817  | + | 2892  | 8.353222 | 0.066826 | -0.64594 | 0.2131   | -3.03116 | 0.003109 | 0.022339 | 1 |
| ENSG0000 | mucosal h | Inflamed | CCL17     | protein_cc chr16 | 57438679 | 57449974 | + | 615   | 25.21002 | 0.147971 | -1.02336 | 0.33763  | -3.031   | 0.003111 | 0.022344 | 1 |

|          |           |          |           |            |       |          |          |   |       |          |          |          |          |          |          |          |   |
|----------|-----------|----------|-----------|------------|-------|----------|----------|---|-------|----------|----------|----------|----------|----------|----------|----------|---|
| ENSG0000 | mucosal h | Inflamed | RP11-5357 | lincRNA    | chr18 | 19927809 | 19928215 | - | 407   | 3.434368 | 0.286396 | 0.499593 | 0.164879 | 3.030059 | 0.003119 | 0.022401 | 1 |
| ENSG0000 | mucosal h | Inflamed | C16orf70  | protein_cc | chr16 | 67143861 | 67182442 | + | 5965  | 792.2148 | 0        | 0.221419 | 0.073085 | 3.029618 | 0.003124 | 0.022425 | 1 |
| ENSG0000 | mucosal h | Inflamed | LHFP      | protein_cc | chr13 | 39917029 | 40177665 | - | 2327  | 668.9666 | 0        | -0.62756 | 0.207149 | -3.02949 | 0.003125 | 0.022427 | 1 |
| ENSG0000 | mucosal h | Inflamed | RNU6-574  | snRNA      | chr12 | 52381441 | 52381547 | + | 107   | 1.47494  | 0.603819 | 0.40688  | 0.134317 | 3.029256 | 0.003127 | 0.022436 | 1 |
| ENSG0000 | mucosal h | Inflamed | ADIPOR2   | protein_cc | chr12 | 17977740 | 1897844  | + | 5878  | 4946.988 | 0        | 0.397601 | 0.131257 | 3.02918  | 0.003128 | 0.022436 | 1 |
| ENSG0000 | mucosal h | Inflamed | SETD9     | protein_cc | chr5  | 56205087 | 56221359 | + | 2535  | 197.6778 | 0        | 0.441868 | 0.145881 | 3.028966 | 0.00313  | 0.022445 | 1 |
| ENSG0000 | mucosal h | Inflamed | CDK3      | protein_cc | chr17 | 73996987 | 74002080 | + | 1803  | 30.68258 | 0.02864  | 0.668947 | 0.220866 | 3.028742 | 0.003132 | 0.022445 | 1 |
| ENSG0000 | mucosal h | Inflamed | CHST5     | protein_cc | chr16 | 75562433 | 75569145 | - | 3322  | 605.3103 | 0        | 0.946576 | 0.312532 | 3.028738 | 0.003132 | 0.022445 | 1 |
| ENSG0000 | mucosal h | Inflamed | CTC-448F2 | pseudoger  | chr19 | 30528330 | 30529063 | + | 734   | 11.68496 | 0.064439 | 0.605557 | 0.19994  | 3.028688 | 0.003132 | 0.022445 | 1 |
| ENSG0000 | mucosal h | Inflamed | ZC2HC1C   | protein_cc | chr14 | 75530873 | 75545126 | + | 3248  | 91.04535 | 0        | 0.457333 | 0.151013 | 3.028445 | 0.003135 | 0.022456 | 1 |
| ENSG0000 | mucosal h | Inflamed | RP11-245C | lincRNA    | chr2  | 11018395 | 11025244 | + | 461   | 1.928401 | 0.608592 | 0.465723 | 0.153797 | 3.028168 | 0.003137 | 0.022468 | 1 |
| ENSG0000 | mucosal h | Inflamed | ZNF789    | protein_cc | chr7  | 99070464 | 99101273 | + | 6683  | 695.4535 | 0        | 0.732479 | 0.241941 | 3.027512 | 0.003144 | 0.022507 | 1 |
| ENSG0000 | mucosal h | Inflamed | SHD       | protein_cc | chr19 | 4278598  | 4290721  | + | 2811  | 276.4296 | 0        | 0.760116 | 0.251119 | 3.026918 | 0.003149 | 0.022541 | 1 |
| ENSG0000 | mucosal h | Inflamed | KCNB2     | protein_cc | chr8  | 73449626 | 73850584 | + | 3582  | 4.883055 | 0.236277 | 0.655643 | 0.216648 | 3.026311 | 0.003155 | 0.022577 | 1 |
| ENSG0000 | mucosal h | Inflamed | CTD-2655t | antisense  | chr11 | 67889520 | 67897985 | + | 776   | 1.057279 | 0.713604 | 0.323652 | 0.106971 | 3.025588 | 0.003162 | 0.022618 | 1 |
| ENSG0000 | mucosal h | Inflamed | NADSYN1   | protein_cc | chr11 | 71164155 | 71235153 | + | 14970 | 5329.783 | 0        | 0.291355 | 0.096299 | 3.025509 | 0.003163 | 0.022618 | 1 |
| ENSG0000 | mucosal h | Inflamed | RP11-439E | antisense  | chr1  | 2.47E+08 | 2.47E+08 | + | 3472  | 29.88783 | 0.045346 | 0.729549 | 0.241141 | 3.0254   | 0.003164 | 0.022618 | 1 |
| ENSG0000 | mucosal h | Inflamed | NRCAM     | protein_cc | chr7  | 1.08E+08 | 1.08E+08 | - | 7939  | 173.8282 | 0.016706 | -1.30797 | 0.432337 | -3.02535 | 0.003164 | 0.022618 | 1 |
| ENSG0000 | mucosal h | Inflamed | MLLT11    | protein_cc | chr1  | 1.51E+08 | 1.51E+08 | + | 4072  | 65.04773 | 0        | -0.64284 | 0.212492 | -3.02524 | 0.003165 | 0.022619 | 1 |
| ENSG0000 | mucosal h | Inflamed | AF186192. | pseudoger  | chr8  | 1.46E+08 | 1.46E+08 | + | 1932  | 10.41527 | 0.081146 | 0.674304 | 0.222911 | 3.024996 | 0.003168 | 0.02263  | 1 |
| ENSG0000 | mucosal h | Inflamed | CLU       | protein_cc | chr8  | 27454434 | 27472548 | - | 6616  | 5963.523 | 0        | -0.90059 | 0.297737 | -3.02479 | 0.00317  | 0.022637 | 1 |
| ENSG0000 | mucosal h | Inflamed | RP11-284M | lincRNA    | chr1  | 1.11E+08 | 1.11E+08 | - | 3481  | 301.0549 | 0.002387 | -1.03752 | 0.343029 | -3.02458 | 0.003172 | 0.022646 | 1 |
| ENSG0000 | mucosal h | Inflamed | SIMC1     | protein_cc | chr5  | 1.76E+08 | 1.76E+08 | + | 5702  | 693.5394 | 0        | 0.377717 | 0.124891 | 3.024373 | 0.003174 | 0.022654 | 1 |
| ENSG0000 | mucosal h | Inflamed | NOTUM     | protein_cc | chr17 | 79910388 | 79919716 | - | 3014  | 39.18138 | 0.062053 | -1.21449 | 0.401609 | -3.02406 | 0.003177 | 0.022667 | 1 |
| ENSG0000 | mucosal h | Inflamed | RP11-665M | lincRNA    | chr11 | 64658158 | 64658547 | - | 390   | 679.3962 | 0        | 0.975275 | 0.322516 | 3.02396  | 0.003178 | 0.022667 | 1 |
| ENSG0000 | mucosal h | Inflamed | AC016683  | antisense  | chr2  | 1.14E+08 | 1.14E+08 | - | 1074  | 1.22673  | 0.708831 | -0.38654 | 0.127828 | -3.02391 | 0.003178 | 0.022667 | 1 |
| ENSG0000 | mucosal h | Inflamed | NAPEPLD   | protein_cc | chr7  | 1.03E+08 | 1.03E+08 | - | 7561  | 1040.384 | 0        | 0.74115  | 0.245131 | 3.023481 | 0.003182 | 0.02269  | 1 |
| ENSG0000 | mucosal h | Inflamed | TLL6      | protein_cc | chr17 | 46839597 | 46894576 | - | 5097  | 417.8496 | 0.00716  | 0.974264 | 0.32227  | 3.023133 | 0.003186 | 0.022708 | 1 |
| ENSG0000 | mucosal h | Inflamed | ARHGAP35  | protein_cc | chr19 | 47421933 | 47508334 | + | 11245 | 5280.711 | 0        | 0.476587 | 0.157656 | 3.022948 | 0.003187 | 0.022714 | 1 |
| ENSG0000 | mucosal h | Inflamed | PHACTR4   | protein_cc | chr1  | 28696114 | 28826881 | + | 7165  | 2786.814 | 0        | 0.438939 | 0.145213 | 3.02272  | 0.003189 | 0.022719 | 1 |
| ENSG0000 | mucosal h | Inflamed | SYNJ2     | protein_cc | chr6  | 1.58E+08 | 1.59E+08 | + | 9985  | 2117.255 | 0        | 0.412758 | 0.136552 | 3.022709 | 0.00319  | 0.022719 | 1 |
| ENSG0000 | mucosal h | Inflamed | SLC25A47f | pseudoger  | chr11 | 59030862 | 59031275 | - | 414   | 7.396181 | 0.322196 | 0.831791 | 0.275215 | 3.02233  | 0.003193 | 0.022738 | 1 |
| ENSG0000 | mucosal h | Inflamed | HTR7      | protein_cc | chr10 | 92500578 | 92617671 | - | 3447  | 44.09547 | 0.016706 | 0.631077 | 0.208818 | 3.022132 | 0.003195 | 0.022746 | 1 |
| ENSG0000 | mucosal h | Inflamed | TRAPPC6A  | protein_cc | chr19 | 45666186 | 45681495 | - | 933   | 431.5776 | 0        | 0.408844 | 0.135303 | 3.021687 | 0.003199 | 0.022765 | 1 |
| ENSG0000 | mucosal h | Inflamed | NDUFA10   | protein_cc | chr2  | 2.41E+08 | 2.41E+08 | - | 9516  | 3617.881 | 0        | 0.327781 | 0.108479 | 3.021591 | 0.0032   | 0.022765 | 1 |
| ENSG0000 | mucosal h | Inflamed | TEX11     | protein_cc | chrX  | 69748790 | 70128581 | - | 3371  | 63.31981 | 0        | 0.636516 | 0.210661 | 3.021514 | 0.003201 | 0.022765 | 1 |
| ENSG0000 | mucosal h | Inflamed | GMPR      | protein_cc | chr6  | 16238811 | 16295780 | + | 2232  | 227.1551 | 0        | -0.45553 | 0.150762 | -3.02149 | 0.003201 | 0.022765 | 1 |
| ENSG0000 | mucosal h | Inflamed | SIPA1     | protein_cc | chr11 | 65405568 | 65418401 | + | 4668  | 2610.809 | 0        | -0.55052 | 0.182227 | -3.02108 | 0.003205 | 0.022788 | 1 |
| ENSG0000 | mucosal h | Inflamed | C1orf204  | protein_cc | chr1  | 1.6E+08  | 1.6E+08  | - | 2501  | 44.02625 | 0.009547 | 0.627269 | 0.207639 | 3.020963 | 0.003206 | 0.022789 | 1 |
| ENSG0000 | mucosal h | Inflamed | KNG1      | protein_cc | chr3  | 1.86E+08 | 1.86E+08 | + | 3740  | 26.42005 | 0.143198 | 1.035764 | 0.343054 | 3.019247 | 0.003223 | 0.022897 | 1 |



|          |           |          |           |                  |          |          |   |       |          |          |          |          |          |          |          |   |
|----------|-----------|----------|-----------|------------------|----------|----------|---|-------|----------|----------|----------|----------|----------|----------|----------|---|
| ENSG0000 | mucosal h | Inflamed | SSBP3     | protein_cc chr1  | 54691105 | 54879152 | - | 5227  | 3341.365 | 0        | 0.342078 | 0.1133   | 3.019223 | 0.003223 | 0.022897 | 1 |
| ENSG0000 | mucosal h | Inflamed | CNST      | protein_cc chr1  | 2.47E+08 | 2.47E+08 | + | 5922  | 1181.771 | 0        | 0.600407 | 0.198873 | 3.019045 | 0.003225 | 0.022903 | 1 |
| ENSG0000 | mucosal h | Inflamed | GIPC1     | protein_cc chr19 | 14588572 | 14606944 | - | 4423  | 10770.74 | 0        | 0.446015 | 0.147754 | 3.018628 | 0.003229 | 0.022926 | 1 |
| ENSG0000 | mucosal h | Inflamed | GNG4      | protein_cc chr1  | 2.36E+08 | 2.36E+08 | - | 5413  | 139.1647 | 0        | 0.696235 | 0.230675 | 3.018249 | 0.003233 | 0.022946 | 1 |
| ENSG0000 | mucosal h | Inflamed | RP11-148C | pseudoger chr3   | 1.08E+08 | 1.08E+08 | - | 97    | 0.911695 | 0.794749 | 0.358563 | 0.118815 | 3.017833 | 0.003237 | 0.022968 | 1 |
| ENSG0000 | mucosal h | Inflamed | AC007405  | lincRNA chr2     | 1.72E+08 | 1.72E+08 | - | 2026  | 2.183771 | 0.49642  | 0.451134 | 0.149504 | 3.017529 | 0.00324  | 0.022983 | 1 |
| ENSG0000 | mucosal h | Inflamed | CTC-548K1 | lincRNA chr19    | 14416270 | 14481008 | - | 1016  | 3.183771 | 0.338902 | -0.5115  | 0.169516 | -3.01741 | 0.003241 | 0.022986 | 1 |
| ENSG0000 | mucosal h | Inflamed | OTUD7B    | protein_cc chr1  | 1.5E+08  | 1.5E+08  | - | 12184 | 1648.425 | 0        | 0.514909 | 0.170671 | 3.01697  | 0.003245 | 0.023006 | 1 |
| ENSG0000 | mucosal h | Inflamed | RP11-66B2 | antisense chr15  | 1.01E+08 | 1.01E+08 | - | 5911  | 175.2864 | 0        | 0.448583 | 0.148688 | 3.016931 | 0.003246 | 0.023006 | 1 |
| ENSG0000 | mucosal h | Inflamed | AEN       | protein_cc chr15 | 89164527 | 89175513 | + | 6018  | 1315.267 | 0        | -0.37526 | 0.124399 | -3.01658 | 0.003249 | 0.023025 | 1 |
| ENSG0000 | mucosal h | Inflamed | AMER3     | protein_cc chr2  | 1.32E+08 | 1.32E+08 | + | 6543  | 20.05251 | 0.076372 | 0.91597  | 0.303693 | 3.016106 | 0.003254 | 0.023051 | 1 |
| ENSG0000 | mucosal h | Inflamed | HYKK      | protein_cc chr15 | 78799906 | 78829714 | + | 2732  | 75.3747  | 0        | 0.367774 | 0.121946 | 3.015878 | 0.003256 | 0.023061 | 1 |
| ENSG0000 | mucosal h | Inflamed | MGC10951  | protein_cc chr2  | 74361599 | 74362521 | + | 923   | 1.988067 | 0.653938 | 0.493157 | 0.163533 | 3.015643 | 0.003258 | 0.023071 | 1 |
| ENSG0000 | mucosal h | Inflamed | ABR       | protein_cc chr17 | 906758   | 1132315  | - | 11709 | 12144.74 | 0        | 0.36832  | 0.122142 | 3.015509 | 0.00326  | 0.023074 | 1 |
| ENSG0000 | mucosal h | Inflamed | SEMA4G    | protein_cc chr10 | 1.03E+08 | 1.03E+08 | + | 5253  | 6166.458 | 0        | 0.749165 | 0.248445 | 3.015417 | 0.003261 | 0.023074 | 1 |
| ENSG0000 | mucosal h | Inflamed | TCP11L1   | protein_cc chr11 | 33060963 | 33127489 | + | 5370  | 628.7852 | 0        | 0.349832 | 0.11602  | 3.015274 | 0.003262 | 0.023078 | 1 |
| ENSG0000 | mucosal h | Inflamed | AC145676  | protein_cc chr7  | 227554   | 229557   | - | 2004  | 14.81146 | 0.243437 | -1.1311  | 0.375145 | -3.0151  | 0.003264 | 0.023084 | 1 |
| ENSG0000 | mucosal h | Inflamed | HIST1H2B1 | protein_cc chr6  | 26251879 | 26252303 | + | 425   | 37.38425 | 0        | 0.533282 | 0.176876 | 3.015002 | 0.003265 | 0.023084 | 1 |
| ENSG0000 | mucosal h | Inflamed | MIR608    | miRNA chr10      | 1.03E+08 | 1.03E+08 | + | 100   | 1.307876 | 0.656325 | 0.395413 | 0.131163 | 3.01467  | 0.003268 | 0.023096 | 1 |
| ENSG0000 | mucosal h | Inflamed | NR2E3     | processed_chr15  | 72084977 | 72110600 | + | 3595  | 5.778043 | 0.217184 | 0.687066 | 0.227908 | 3.01466  | 0.003268 | 0.023096 | 1 |
| ENSG0000 | mucosal h | Inflamed | KIAA1211  | protein_cc chr4  | 57036361 | 57194791 | + | 5939  | 1914.99  | 0        | 0.64466  | 0.213854 | 3.014484 | 0.00327  | 0.023102 | 1 |
| ENSG0000 | mucosal h | Inflamed | CNFN      | protein_cc chr19 | 42891171 | 42894439 | - | 603   | 52.69451 | 0        | 0.680053 | 0.225615 | 3.014218 | 0.003272 | 0.023114 | 1 |
| ENSG0000 | mucosal h | Inflamed | EC1       | protein_cc chr16 | 2289396  | 2302301  | - | 3234  | 1626.243 | 0        | 0.301338 | 0.099986 | 3.013794 | 0.003277 | 0.023134 | 1 |
| ENSG0000 | mucosal h | Inflamed | IKZF3     | protein_cc chr17 | 37921198 | 38020441 | - | 2778  | 422.0811 | 0.011933 | -0.86479 | 0.286947 | -3.01376 | 0.003277 | 0.023134 | 1 |
| ENSG0000 | mucosal h | Inflamed | IL27RA    | protein_cc chr19 | 14142560 | 14163743 | + | 2677  | 735.3461 | 0        | -0.62594 | 0.207701 | -3.01365 | 0.003278 | 0.023136 | 1 |
| ENSG0000 | mucosal h | Inflamed | RP11-879F | lincRNA chr18    | 59252979 | 59274149 | - | 1199  | 3.171838 | 0.384248 | -0.59148 | 0.196285 | -3.01339 | 0.003281 | 0.023147 | 1 |
| ENSG0000 | mucosal h | Inflamed | AC073869  | pseudoger chr2   | 1.32E+08 | 1.32E+08 | - | 3666  | 77.22196 | 0.01432  | 0.779118 | 0.25859  | 3.012944 | 0.003285 | 0.023172 | 1 |
| ENSG0000 | mucosal h | Inflamed | CASC1     | protein_cc chr12 | 25261354 | 25348096 | - | 2952  | 1.940334 | 0.515513 | 0.469252 | 0.155768 | 3.01251  | 0.003289 | 0.023193 | 1 |
| ENSG0000 | mucosal h | Inflamed | MAN2B1    | protein_cc chr19 | 12757325 | 12777556 | - | 5374  | 6293.907 | 0        | -0.35784 | 0.118787 | -3.01247 | 0.00329  | 0.023193 | 1 |
| ENSG0000 | mucosal h | Inflamed | TRBV28    | TR_V_gene chr7   | 1.42E+08 | 1.42E+08 | + | 364   | 32.6611  | 0.038186 | -0.76872 | 0.255186 | -3.01238 | 0.003291 | 0.023193 | 1 |
| ENSG0000 | mucosal h | Inflamed | FABP5P7   | pseudoger chr11  | 59548786 | 59549195 | - | 410   | 11.13842 | 0.023866 | 0.540443 | 0.179413 | 3.012285 | 0.003292 | 0.023193 | 1 |
| ENSG0000 | mucosal h | Inflamed | FGD2      | protein_cc chr6  | 36973422 | 36996846 | + | 10167 | 1538.294 | 0        | -0.58504 | 0.194231 | -3.0121  | 0.003293 | 0.0232   | 1 |
| ENSG0000 | mucosal h | Inflamed | MTRNR2L2  | protein_cc chr5  | 79945819 | 79946855 | - | 1037  | 330.8592 | 0        | 0.747328 | 0.24813  | 3.011843 | 0.003296 | 0.023212 | 1 |
| ENSG0000 | mucosal h | Inflamed | RP11-432I | antisense chr16  | 71757083 | 71758133 | + | 777   | 12.48687 | 0.124105 | 0.644071 | 0.213855 | 3.011721 | 0.003297 | 0.023214 | 1 |
| ENSG0000 | mucosal h | Inflamed | B3GALNT1  | protein_cc chr3  | 1.61E+08 | 1.61E+08 | - | 4183  | 69.08592 | 0.011933 | -0.67985 | 0.225751 | -3.01152 | 0.003299 | 0.023215 | 1 |
| ENSG0000 | mucosal h | Inflamed | CD3D      | protein_cc chr11 | 1.18E+08 | 1.18E+08 | - | 929   | 374.4081 | 0        | -0.64396 | 0.213846 | -3.01134 | 0.003301 | 0.023215 | 1 |
| ENSG0000 | mucosal h | Inflamed | IFNG      | protein_cc chr12 | 68548548 | 68553527 | - | 1218  | 19.42959 | 0.131265 | -0.98469 | 0.326997 | -3.01131 | 0.003301 | 0.023215 | 1 |
| ENSG0000 | mucosal h | Inflamed | SIAE      | protein_cc chr11 | 1.25E+08 | 1.25E+08 | - | 7911  | 6185.706 | 0        | 0.531981 | 0.176663 | 3.011274 | 0.003302 | 0.023215 | 1 |
| ENSG0000 | mucosal h | Inflamed | PAK4      | protein_cc chr19 | 39616410 | 39673456 | + | 7118  | 3405.263 | 0        | 0.451499 | 0.149937 | 3.011261 | 0.003302 | 0.023215 | 1 |
| ENSG0000 | mucosal h | Inflamed | ESAM      | protein_cc chr11 | 1.25E+08 | 1.25E+08 | - | 3373  | 1181.325 | 0        | -0.5512  | 0.183066 | -3.01093 | 0.003305 | 0.023232 | 1 |

|          |           |          |           |               |       |          |          |   |       |          |          |          |          |          |          |          |   |
|----------|-----------|----------|-----------|---------------|-------|----------|----------|---|-------|----------|----------|----------|----------|----------|----------|----------|---|
| ENSG0000 | mucosal h | Inflamed | RP11-416I | lincRNA       | chr17 | 16915228 | 16918304 | - | 3077  | 5.548926 | 0.384248 | -0.74489 | 0.247423 | -3.01057 | 0.003309 | 0.023251 | 1 |
| ENSG0000 | mucosal h | Inflamed | GS1-124K5 | lincRNA       | chr7  | 65991075 | 66007536 | - | 7092  | 553.7852 | 0        | 0.532206 | 0.176791 | 3.01037  | 0.003311 | 0.023259 | 1 |
| ENSG0000 | mucosal h | Inflamed | CHKB-AS1  | antisense     | chr22 | 51021455 | 51022306 | + | 578   | 16.21718 | 0.004773 | -0.44777 | 0.148766 | -3.00989 | 0.003315 | 0.02328  | 1 |
| ENSG0000 | mucosal h | Inflamed | TM4SF1    | protein_cc    | chr3  | 1.49E+08 | 1.49E+08 | - | 3668  | 2807.274 | 0        | -0.69725 | 0.231659 | -3.00982 | 0.003316 | 0.02328  | 1 |
| ENSG0000 | mucosal h | Inflamed | HDAC1P1   | pseudoger     | chr10 | 95897505 | 95899257 | + | 1445  | 2.832936 | 0.424821 | 0.525153 | 0.174481 | 3.009805 | 0.003316 | 0.02328  | 1 |
| ENSG0000 | mucosal h | Inflamed | HIST1H2AI | protein_cc    | chr6  | 27775899 | 27776429 | + | 531   | 16.06683 | 0.026253 | 0.634577 | 0.210858 | 3.009495 | 0.003319 | 0.023295 | 1 |
| ENSG0000 | mucosal h | Inflamed | FKBP10    | protein_cc    | chr17 | 39968932 | 39979465 | + | 4269  | 2254.73  | 0        | -0.65778 | 0.218602 | -3.00904 | 0.003324 | 0.023321 | 1 |
| ENSG0000 | mucosal h | Inflamed | GPR39     | protein_cc    | chr2  | 1.33E+08 | 1.33E+08 | + | 3343  | 674.9308 | 0        | 0.607722 | 0.201983 | 3.008778 | 0.003326 | 0.023333 | 1 |
| ENSG0000 | mucosal h | Inflamed | NIPAL3    | protein_cc    | chr1  | 24742284 | 24799466 | + | 9404  | 2108.177 | 0        | 0.398453 | 0.132442 | 3.008508 | 0.003329 | 0.023346 | 1 |
| ENSG0000 | mucosal h | Inflamed | LINC00963 | processed_chr | 9     | 1.32E+08 | 1.32E+08 | + | 12641 | 1544.177 | 0        | -0.31059 | 0.103268 | -3.00758 | 0.003339 | 0.023405 | 1 |
| ENSG0000 | mucosal h | Inflamed | AKR7L     | polymorpt     | chr1  | 19592476 | 19600688 | - | 2768  | 275.0048 | 0        | 0.828304 | 0.275546 | 3.006048 | 0.003354 | 0.023507 | 1 |
| ENSG0000 | mucosal h | Inflamed | ZNF808    | protein_cc    | chr19 | 53030905 | 53067717 | + | 5008  | 350.3365 | 0        | 0.658314 | 0.219014 | 3.005801 | 0.003356 | 0.023516 | 1 |
| ENSG0000 | mucosal h | Inflamed | CHMP4B    | protein_cc    | chr20 | 32399110 | 32442172 | + | 1646  | 7393.131 | 0        | 0.218073 | 0.072552 | 3.005752 | 0.003357 | 0.023516 | 1 |
| ENSG0000 | mucosal h | Inflamed | ZNF350    | protein_cc    | chr19 | 52467596 | 52490109 | - | 4539  | 212.4606 | 0        | 0.563183 | 0.187403 | 3.005199 | 0.003363 | 0.023548 | 1 |
| ENSG0000 | mucosal h | Inflamed | S1PR2     | protein_cc    | chr19 | 10334520 | 10341948 | - | 1173  | 138.8305 | 0.00716  | -0.66046 | 0.219787 | -3.00502 | 0.003364 | 0.023555 | 1 |
| ENSG0000 | mucosal h | Inflamed | CCDC178   | protein_cc    | chr18 | 30517366 | 31021065 | - | 4475  | 8.293556 | 0.167064 | -0.68805 | 0.229025 | -3.00428 | 0.003372 | 0.023601 | 1 |
| ENSG0000 | mucosal h | Inflamed | RP5-1063M | lincRNA       | chr12 | 3427884  | 3434509  | + | 3004  | 2.205251 | 0.515513 | 0.513734 | 0.171012 | 3.004086 | 0.003374 | 0.023609 | 1 |
| ENSG0000 | mucosal h | Inflamed | METTL2A   | protein_cc    | chr17 | 60501228 | 60527454 | + | 3114  | 455.9523 | 0        | 0.24518  | 0.081633 | 3.003443 | 0.00338  | 0.02364  | 1 |
| ENSG0000 | mucosal h | Inflamed | LINC00694 | lincRNA       | chr3  | 44462619 | 44465499 | - | 732   | 33.77804 | 0.016706 | -0.96158 | 0.320166 | -3.0034  | 0.003381 | 0.02364  | 1 |
| ENSG0000 | mucosal h | Inflamed | RP11-380C | pseudoger     | chr10 | 89705259 | 89705781 | + | 523   | 3.754177 | 0.305489 | 0.605076 | 0.201465 | 3.003378 | 0.003381 | 0.02364  | 1 |
| ENSG0000 | mucosal h | Inflamed | RP4-794H  | lincRNA       | chr1  | 59348540 | 59362375 | - | 1249  | 36.77088 | 0        | 0.416589 | 0.138725 | 3.002989 | 0.003385 | 0.023661 | 1 |
| ENSG0000 | mucosal h | Inflamed | KIAA1147  | protein_cc    | chr7  | 1.41E+08 | 1.41E+08 | - | 7356  | 3053.905 | 0        | 0.655855 | 0.21842  | 3.002721 | 0.003388 | 0.023664 | 1 |
| ENSG0000 | mucosal h | Inflamed | SCAMP5    | protein_cc    | chr15 | 75249560 | 75313837 | + | 4874  | 1130.535 | 0        | -0.60761 | 0.202356 | -3.00268 | 0.003388 | 0.023664 | 1 |
| ENSG0000 | mucosal h | Inflamed | SRI       | protein_cc    | chr7  | 87834433 | 87856308 | - | 4237  | 6984.547 | 0        | 0.479275 | 0.159618 | 3.002643 | 0.003388 | 0.023664 | 1 |
| ENSG0000 | mucosal h | Inflamed | PTPRD     | protein_cc    | chr9  | 8314246  | 10612723 | - | 11081 | 1114.835 | 0        | 0.80611  | 0.268471 | 3.002594 | 0.003389 | 0.023664 | 1 |
| ENSG0000 | mucosal h | Inflamed | B2M       | protein_cc    | chr15 | 45003675 | 45011075 | + | 3151  | 104741.5 | 0        | -0.37718 | 0.125654 | -3.00176 | 0.003397 | 0.023714 | 1 |
| ENSG0000 | mucosal h | Inflamed | GFAP      | protein_cc    | chr17 | 42982376 | 42994305 | - | 6086  | 15.48926 | 0.114558 | -0.92711 | 0.30886  | -3.00171 | 0.003398 | 0.023714 | 1 |
| ENSG0000 | mucosal h | Inflamed | CLDN5     | protein_cc    | chr22 | 19510547 | 19515068 | - | 3429  | 729.9379 | 0        | -0.68519 | 0.228272 | -3.00163 | 0.003399 | 0.023714 | 1 |
| ENSG0000 | mucosal h | Inflamed | PCBP2     | protein_cc    | chr12 | 53835525 | 53874946 | + | 8400  | 7924.222 | 0        | 0.175392 | 0.058443 | 3.001073 | 0.003405 | 0.023748 | 1 |
| ENSG0000 | mucosal h | Inflamed | KCNG2     | protein_cc    | chr18 | 77623668 | 77660184 | + | 2162  | 10.92363 | 0.147971 | -0.77983 | 0.259865 | -3.00092 | 0.003406 | 0.023752 | 1 |
| ENSG0000 | mucosal h | Inflamed | CHCHD4    | protein_cc    | chr3  | 14153580 | 14166370 | - | 1769  | 425.9045 | 0        | 0.257604 | 0.085846 | 3.000754 | 0.003408 | 0.023758 | 1 |
| ENSG0000 | mucosal h | Inflamed | PKIA      | protein_cc    | chr8  | 79428374 | 79517502 | + | 4216  | 125.1098 | 0        | -0.70866 | 0.236199 | -3.00025 | 0.003413 | 0.023787 | 1 |
| ENSG0000 | mucosal h | Inflamed | CANT1     | protein_cc    | chr17 | 76987799 | 77005949 | - | 4414  | 15847.94 | 0        | 0.389612 | 0.129867 | 3.000098 | 0.003415 | 0.023787 | 1 |
| ENSG0000 | mucosal h | Inflamed | RP11-274E | pseudoger     | chr5  | 97549106 | 97549825 | + | 720   | 87.94272 | 0        | -0.4097  | 0.136566 | -3.00001 | 0.003415 | 0.023787 | 1 |
| ENSG0000 | mucosal h | Inflamed | ARHGEF15  | protein_cc    | chr17 | 8213559  | 8225829  | + | 5291  | 503.9785 | 0        | -0.72419 | 0.241396 | -2.99999 | 0.003416 | 0.023787 | 1 |
| ENSG0000 | mucosal h | Inflamed | MKX       | protein_cc    | chr10 | 27961804 | 28034989 | - | 4106  | 16.04296 | 0.093079 | -0.81626 | 0.272143 | -2.99936 | 0.003422 | 0.023826 | 1 |
| ENSG0000 | mucosal h | Inflamed | SHKBP1    | protein_cc    | chr19 | 41082757 | 41097305 | + | 3936  | 3452.442 | 0        | -0.31865 | 0.106247 | -2.99918 | 0.003424 | 0.023833 | 1 |
| ENSG0000 | mucosal h | Inflamed | FBXO34    | protein_cc    | chr14 | 55738021 | 55828636 | + | 4133  | 1971.002 | 0        | 0.531815 | 0.177335 | 2.998927 | 0.003427 | 0.023844 | 1 |
| ENSG0000 | mucosal h | Inflamed | TINAGL1   | protein_cc    | chr1  | 32042116 | 32053288 | + | 5925  | 5525.711 | 0        | 0.398461 | 0.13288  | 2.998651 | 0.003429 | 0.023858 | 1 |
| ENSG0000 | mucosal h | Inflamed | ALDH1A2   | protein_cc    | chr15 | 58245622 | 58790065 | - | 8622  | 354.9857 | 0.011933 | -1.19507 | 0.398559 | -2.99849 | 0.003431 | 0.023863 | 1 |

|          |           |          |           |            |       |          |          |   |       |          |          |          |          |          |          |          |   |
|----------|-----------|----------|-----------|------------|-------|----------|----------|---|-------|----------|----------|----------|----------|----------|----------|----------|---|
| ENSG0000 | mucosal h | Inflamed | AC106869  | lincRNA    | chr2  | 47452933 | 47466364 | + | 677   | 11.74224 | 0.181384 | 0.786986 | 0.262468 | 2.998408 | 0.003432 | 0.023863 | 1 |
| ENSG0000 | mucosal h | Inflamed | GALR2     | protein_cc | chr17 | 74070875 | 74073622 | + | 1364  | 5.556086 | 0.143198 | -0.54616 | 0.182167 | -2.99815 | 0.003435 | 0.023867 | 1 |
| ENSG0000 | mucosal h | Inflamed | MT-TD     | Mt_tRNA    | chrM  | 7518     | 7585     | + | 68    | 159.2053 | 0.038186 | 0.900682 | 0.300417 | 2.998109 | 0.003435 | 0.023867 | 1 |
| ENSG0000 | mucosal h | Inflamed | AKR1A1    | protein_cc | chr1  | 46016215 | 46035721 | + | 3121  | 4202.673 | 0        | -0.24225 | 0.080803 | -2.99808 | 0.003435 | 0.023867 | 1 |
| ENSG0000 | mucosal h | Inflamed | CTC-429P  | sense_intr | chr19 | 16750778 | 16751479 | - | 546   | 60.81146 | 0.0358   | 0.596172 | 0.198893 | 2.997454 | 0.003442 | 0.023904 | 1 |
| ENSG0000 | mucosal h | Inflamed | RP11-1971 | sense_intr | chr10 | 16763351 | 16790376 | - | 697   | 5.200477 | 0.21957  | 0.563684 | 0.188064 | 2.997291 | 0.003443 | 0.023904 | 1 |
| ENSG0000 | mucosal h | Inflamed | NUDT14    | protein_cc | chr14 | 1.06E+08 | 1.06E+08 | - | 1916  | 562.9165 | 0        | 0.331787 | 0.110696 | 2.997284 | 0.003443 | 0.023904 | 1 |
| ENSG0000 | mucosal h | Inflamed | RP11-6311 | pseudoger  | chr5  | 60642953 | 60643543 | + | 591   | 2.381862 | 0.46778  | 0.512132 | 0.170869 | 2.997215 | 0.003444 | 0.023904 | 1 |
| ENSG0000 | mucosal h | Inflamed | DENND1C   | protein_cc | chr19 | 6467218  | 6482568  | - | 4657  | 980.3341 | 0        | -0.57598 | 0.19218  | -2.99711 | 0.003445 | 0.023905 | 1 |
| ENSG0000 | mucosal h | Inflamed | RP11-2E11 | lincRNA    | chr7  | 1.3E+08  | 1.3E+08  | - | 2902  | 3.494033 | 0.357995 | 0.535569 | 0.178734 | 2.996457 | 0.003452 | 0.023946 | 1 |
| ENSG0000 | mucosal h | Inflamed | CLDN23    | protein_cc | chr8  | 8559448  | 8561616  | + | 2169  | 671.3771 | 0        | 0.682999 | 0.227969 | 2.996019 | 0.003457 | 0.023971 | 1 |
| ENSG0000 | mucosal h | Inflamed | HNF1B     | protein_cc | chr17 | 36046435 | 36105237 | - | 5960  | 1481.284 | 0        | 0.832055 | 0.277741 | 2.995796 | 0.003459 | 0.023977 | 1 |
| ENSG0000 | mucosal h | Inflamed | GPR116    | protein_cc | chr6  | 46820249 | 46922680 | - | 6717  | 994.3604 | 0.002387 | -0.86125 | 0.28749  | -2.99577 | 0.003459 | 0.023977 | 1 |
| ENSG0000 | mucosal h | Inflamed | RP5-943J3 | lincRNA    | chr1  | 90285733 | 90286427 | - | 695   | 26.74463 | 0.004773 | 0.530272 | 0.177014 | 2.99565  | 0.00346  | 0.023979 | 1 |
| ENSG0000 | mucosal h | Inflamed | CTD-20541 | pseudoger  | chr15 | 1E+08    | 1E+08    | + | 739   | 0.854415 | 0.794749 | 0.341204 | 0.113915 | 2.995252 | 0.003465 | 0.024001 | 1 |
| ENSG0000 | mucosal h | Inflamed | SIAH3     | protein_cc | chr13 | 46354405 | 46425871 | - | 4030  | 4.293556 | 0.353222 | 0.730351 | 0.243844 | 2.995163 | 0.003466 | 0.024001 | 1 |
| ENSG0000 | mucosal h | Inflamed | LRR57     | protein_cc | chr15 | 42834720 | 42841000 | - | 3412  | 589.5036 | 0        | 0.366298 | 0.122302 | 2.99503  | 0.003467 | 0.024004 | 1 |
| ENSG0000 | mucosal h | Inflamed | RP11-485C | lincRNA    | chr3  | 1.42E+08 | 1.42E+08 | - | 4452  | 703.2625 | 0        | 0.811012 | 0.270818 | 2.994673 | 0.003471 | 0.024021 | 1 |
| ENSG0000 | mucosal h | Inflamed | GS1-124K  | lincRNA    | chr7  | 65958693 | 65960461 | + | 540   | 19.00716 | 0.002387 | -0.5337  | 0.178219 | -2.99461 | 0.003471 | 0.024021 | 1 |
| ENSG0000 | mucosal h | Inflamed | HSD17B2   | protein_cc | chr16 | 82068609 | 82132139 | + | 2688  | 2667.847 | 0        | 0.796725 | 0.26606  | 2.994537 | 0.003472 | 0.024021 | 1 |
| ENSG0000 | mucosal h | Inflamed | RP11-416C | lincRNA    | chr3  | 1.82E+08 | 1.82E+08 | + | 12085 | 1.613365 | 0.682578 | -0.53373 | 0.178241 | -2.99442 | 0.003473 | 0.024023 | 1 |
| ENSG0000 | mucosal h | Inflamed | HOTTIP    | antisense  | chr7  | 27238194 | 27246878 | + | 5016  | 954.0716 | 0.02864  | 1.020022 | 0.340671 | 2.994154 | 0.003476 | 0.024036 | 1 |
| ENSG0000 | mucosal h | Inflamed | MPG       | protein_cc | chr16 | 127006   | 135852   | + | 1661  | 1241.093 | 0        | -0.41961 | 0.140165 | -2.99371 | 0.003481 | 0.024061 | 1 |
| ENSG0000 | mucosal h | Inflamed | TMC4      | protein_cc | chr19 | 54663846 | 54676944 | - | 4421  | 6269.754 | 0        | 0.649281 | 0.21689  | 2.993599 | 0.003482 | 0.024063 | 1 |
| ENSG0000 | mucosal h | Inflamed | AP000350  | lincRNA    | chr22 | 24243619 | 24249255 | - | 5637  | 141.1026 | 0.24821  | 0.980934 | 0.327752 | 2.992917 | 0.003489 | 0.024106 | 1 |
| ENSG0000 | mucosal h | Inflamed | RP11-509E | sense_intr | chr16 | 6106976  | 6142955  | + | 776   | 0.904535 | 0.76611  | 0.293807 | 0.098179 | 2.992571 | 0.003493 | 0.024122 | 1 |
| ENSG0000 | mucosal h | Inflamed | MYCBPAP   | protein_cc | chr17 | 48585745 | 48608862 | + | 6515  | 26.94272 | 0.023866 | 0.643022 | 0.214879 | 2.992486 | 0.003493 | 0.024122 | 1 |
| ENSG0000 | mucosal h | Inflamed | PSPH      | protein_cc | chr7  | 56078744 | 56119297 | - | 2762  | 229.043  | 0        | -0.25996 | 0.086873 | -2.99244 | 0.003494 | 0.024122 | 1 |
| ENSG0000 | mucosal h | Inflamed | CTB-92J24 | antisense  | chr19 | 24101883 | 24140732 | - | 2233  | 1.832936 | 0.603819 | 0.423524 | 0.141564 | 2.991754 | 0.003501 | 0.024165 | 1 |
| ENSG0000 | mucosal h | Inflamed | RSBN1L-A  | lincRNA    | chr7  | 77286977 | 77325582 | - | 3100  | 237.1384 | 0        | 0.427243 | 0.142822 | 2.991438 | 0.003504 | 0.024182 | 1 |
| ENSG0000 | mucosal h | Inflamed | RP3-500L1 | lincRNA    | chr6  | 13825663 | 13826805 | + | 1143  | 1.78043  | 0.563246 | 0.453262 | 0.151545 | 2.990936 | 0.00351  | 0.024212 | 1 |
| ENSG0000 | mucosal h | Inflamed | LRR46     | protein_cc | chr17 | 45908993 | 45915079 | + | 2820  | 22.10263 | 0.00716  | -0.39504 | 0.132136 | -2.98964 | 0.003523 | 0.024294 | 1 |
| ENSG0000 | mucosal h | Inflamed | SUCLA2    | protein_cc | chr13 | 48510622 | 48612125 | - | 3786  | 952.8496 | 0        | 0.430562 | 0.144018 | 2.989629 | 0.003524 | 0.024294 | 1 |
| ENSG0000 | mucosal h | Inflamed | RP11-20G  | lincRNA    | chr15 | 99935384 | 99936798 | - | 323   | 1.859189 | 0.589499 | -0.51059 | 0.170813 | -2.98916 | 0.003528 | 0.024322 | 1 |
| ENSG0000 | mucosal h | Inflamed | DOK5      | protein_cc | chr20 | 53092136 | 53267710 | + | 2604  | 27.99045 | 0.031026 | -0.74558 | 0.249526 | -2.988   | 0.003541 | 0.024397 | 1 |
| ENSG0000 | mucosal h | Inflamed | SPG21     | protein_cc | chr15 | 65255362 | 65282648 | - | 3984  | 2180.816 | 0        | -0.21525 | 0.072041 | -2.98796 | 0.003541 | 0.024397 | 1 |
| ENSG0000 | mucosal h | Inflamed | CYGB      | protein_cc | chr17 | 74523438 | 74547257 | - | 2949  | 2611.375 | 0        | -0.50415 | 0.16877  | -2.98718 | 0.00355  | 0.024448 | 1 |
| ENSG0000 | mucosal h | Inflamed | ADCY10    | protein_cc | chr1  | 1.68E+08 | 1.68E+08 | - | 6139  | 7.821002 | 0.107399 | 0.552912 | 0.185103 | 2.987058 | 0.003551 | 0.02445  | 1 |
| ENSG0000 | mucosal h | Inflamed | FAM86C2   | pseudoger  | chr11 | 67559119 | 67572807 | - | 3402  | 130.9857 | 0        | 0.35438  | 0.118648 | 2.986826 | 0.003553 | 0.024461 | 1 |
| ENSG0000 | mucosal h | Inflamed | NSUN7     | protein_cc | chr4  | 40751914 | 40812002 | + | 4728  | 251.358  | 0        | 0.517117 | 0.173204 | 2.985594 | 0.003566 | 0.024544 | 1 |

|          |           |          |           |                |       |          |          |   |       |          |          |          |          |          |          |          |   |
|----------|-----------|----------|-----------|----------------|-------|----------|----------|---|-------|----------|----------|----------|----------|----------|----------|----------|---|
| ENSG0000 | mucosal h | Inflamed | RP11-817C | lincRNA        | chr15 | 75660496 | 75661925 | + | 1430  | 70.68735 | 0        | 0.322855 | 0.108141 | 2.985512 | 0.003567 | 0.024544 | 1 |
| ENSG0000 | mucosal h | Inflamed | RASGRF1   | protein_cc     | chr15 | 79252289 | 79383115 | - | 8683  | 65.44391 | 0.004773 | -0.60859 | 0.203869 | -2.98521 | 0.003571 | 0.02456  | 1 |
| ENSG0000 | mucosal h | Inflamed | CYP21A2   | protein_cc     | chr6  | 32006042 | 32009447 | + | 2909  | 11.39618 | 0.126492 | -0.73481 | 0.246174 | -2.98491 | 0.003574 | 0.024576 | 1 |
| ENSG0000 | mucosal h | Inflamed | RP11-366M | processed_chr4 |       | 1.66E+08 | 1.66E+08 | + | 3089  | 5.329356 | 0.329356 | -0.70688 | 0.236839 | -2.98463 | 0.003577 | 0.024589 | 1 |
| ENSG0000 | mucosal h | Inflamed | FGF4      | protein_cc     | chr11 | 69587797 | 69590171 | - | 1220  | 1.799523 | 0.644391 | -0.47938 | 0.160622 | -2.98455 | 0.003578 | 0.024589 | 1 |
| ENSG0000 | mucosal h | Inflamed | EPHA10    | protein_cc     | chr1  | 38179552 | 38230805 | - | 8151  | 2448.53  | 0        | 0.808789 | 0.271015 | 2.984291 | 0.00358  | 0.024602 | 1 |
| ENSG0000 | mucosal h | Inflamed | DOCK8     | protein_cc     | chr9  | 214854   | 465259   | + | 13782 | 2308.866 | 0        | -0.63978 | 0.214396 | -2.98408 | 0.003583 | 0.024611 | 1 |
| ENSG0000 | mucosal h | Inflamed | NR3C2     | protein_cc     | chr4  | 1.49E+08 | 1.49E+08 | - | 6607  | 2936.229 | 0        | 0.93843  | 0.314496 | 2.983919 | 0.003584 | 0.024617 | 1 |
| ENSG0000 | mucosal h | Inflamed | CCDC17    | protein_cc     | chr1  | 46085716 | 46089729 | - | 3323  | 117.5036 | 0        | 0.727009 | 0.243656 | 2.983755 | 0.003586 | 0.024622 | 1 |
| ENSG0000 | mucosal h | Inflamed | RP11-169K | antisense      | chr1  | 16160560 | 16174642 | - | 2882  | 115.0143 | 0        | 0.245043 | 0.082128 | 2.983666 | 0.003587 | 0.024622 | 1 |
| ENSG0000 | mucosal h | Inflamed | RP11-395E | processed_chr7 |       | 1.01E+08 | 1.01E+08 | - | 2552  | 1650.394 | 0        | 0.864757 | 0.289842 | 2.983543 | 0.003588 | 0.024625 | 1 |
| ENSG0000 | mucosal h | Inflamed | GNLY      | protein_cc     | chr2  | 85912298 | 85925977 | + | 3051  | 419.4487 | 0        | -0.91829 | 0.30785  | -2.9829  | 0.003595 | 0.024665 | 1 |
| ENSG0000 | mucosal h | Inflamed | MYO1A     | protein_cc     | chr12 | 57422301 | 57444982 | - | 4438  | 8191.599 | 0        | 1.003068 | 0.336281 | 2.982825 | 0.003596 | 0.024665 | 1 |
| ENSG0000 | mucosal h | Inflamed | ZBTB10    | protein_cc     | chr8  | 81397854 | 81438500 | + | 10216 | 584.7399 | 0.004773 | 0.818331 | 0.27441  | 2.982144 | 0.003603 | 0.024709 | 1 |
| ENSG0000 | mucosal h | Inflamed | IL17RE    | protein_cc     | chr3  | 9944296  | 9958086  | + | 4676  | 2796.282 | 0        | 0.626061 | 0.209955 | 2.981875 | 0.003606 | 0.024722 | 1 |
| ENSG0000 | mucosal h | Inflamed | ZNRF1     | protein_cc     | chr16 | 75032928 | 75144892 | + | 8824  | 1210.036 | 0        | 0.219271 | 0.073538 | 2.981712 | 0.003608 | 0.024728 | 1 |
| ENSG0000 | mucosal h | Inflamed | SLC31A2   | protein_cc     | chr9  | 1.16E+08 | 1.16E+08 | + | 2504  | 551.9642 | 0        | -0.38687 | 0.12975  | -2.98161 | 0.003609 | 0.024729 | 1 |
| ENSG0000 | mucosal h | Inflamed | RP11-465E | pseudoger      | chr1  | 995114   | 1004735  | + | 2171  | 11.76611 | 0.116945 | -0.8055  | 0.270184 | -2.98129 | 0.003613 | 0.024747 | 1 |
| ENSG0000 | mucosal h | Inflamed | PECR      | protein_cc     | chr2  | 2.17E+08 | 2.17E+08 | - | 3182  | 331.0453 | 0        | 0.41814  | 0.140293 | 2.980482 | 0.003621 | 0.0248   | 1 |
| ENSG0000 | mucosal h | Inflamed | ENPP7P8   | pseudoger      | chr11 | 71422786 | 71492229 | + | 1607  | 4.310263 | 0.319809 | 0.671079 | 0.225205 | 2.979854 | 0.003628 | 0.02484  | 1 |
| ENSG0000 | mucosal h | Inflamed | CD177P1   | pseudoger      | chr19 | 43876894 | 43883276 | - | 1061  | 104      | 0.102625 | 1.187803 | 0.398769 | 2.978674 | 0.003641 | 0.024921 | 1 |
| ENSG0000 | mucosal h | Inflamed | CTNND1    | protein_cc     | chr11 | 57520715 | 57587018 | + | 8833  | 25133.65 | 0        | 0.527053 | 0.176949 | 2.97856  | 0.003642 | 0.024922 | 1 |
| ENSG0000 | mucosal h | Inflamed | AC127904  | sense_intr     | chr3  | 1.97E+08 | 1.97E+08 | + | 1109  | 7.107399 | 0.143198 | 0.643342 | 0.215996 | 2.978494 | 0.003643 | 0.024922 | 1 |
| ENSG0000 | mucosal h | Inflamed | SCN1B     | protein_cc     | chr19 | 35521588 | 35531352 | + | 4625  | 221.1074 | 0        | -0.63286 | 0.21249  | -2.97828 | 0.003645 | 0.024931 | 1 |
| ENSG0000 | mucosal h | Inflamed | MAFF      | protein_cc     | chr22 | 38597889 | 38612518 | + | 2977  | 1339.905 | 0        | -0.6295  | 0.211481 | -2.97664 | 0.003663 | 0.025038 | 1 |
| ENSG0000 | mucosal h | Inflamed | ALS2CR12  | protein_cc     | chr2  | 2.02E+08 | 2.02E+08 | - | 2635  | 13.73986 | 0.071599 | 0.636341 | 0.21378  | 2.976611 | 0.003664 | 0.025038 | 1 |
| ENSG0000 | mucosal h | Inflamed | RP11-477F | sense_intr     | chr1  | 1.65E+08 | 1.65E+08 | + | 715   | 7.868735 | 0.076372 | 0.499603 | 0.167844 | 2.976597 | 0.003664 | 0.025038 | 1 |
| ENSG0000 | mucosal h | Inflamed | RP11-600F | antisense      | chr14 | 1.04E+08 | 1.04E+08 | - | 4063  | 98.40811 | 0.011933 | 0.696991 | 0.2342   | 2.976053 | 0.00367  | 0.025069 | 1 |
| ENSG0000 | mucosal h | Inflamed | FAM89B    | protein_cc     | chr11 | 65339820 | 65341669 | + | 1458  | 478.0358 | 0        | -0.38771 | 0.130278 | -2.976   | 0.00367  | 0.025069 | 1 |
| ENSG0000 | mucosal h | Inflamed | KCNS1     | protein_cc     | chr20 | 43720951 | 43729753 | - | 4538  | 15.09785 | 0.119332 | -0.91326 | 0.306928 | -2.97547 | 0.003676 | 0.025099 | 1 |
| ENSG0000 | mucosal h | Inflamed | SLC25A30  | lincRNA        | chr13 | 45992297 | 45994506 | + | 701   | 5.202864 | 0.186158 | 0.478985 | 0.16098  | 2.97543  | 0.003677 | 0.025099 | 1 |
| ENSG0000 | mucosal h | Inflamed | RP11-366L | antisense      | chr2  | 1.83E+08 | 1.83E+08 | - | 3813  | 29.19332 | 0.023866 | 0.592809 | 0.199272 | 2.974871 | 0.003683 | 0.025134 | 1 |
| ENSG0000 | mucosal h | Inflamed | LINC00923 | protein_cc     | chr15 | 98285448 | 98417780 | - | 2342  | 3.589499 | 0.389021 | 0.566898 | 0.190575 | 2.974665 | 0.003685 | 0.025143 | 1 |
| ENSG0000 | mucosal h | Inflamed | NBPF16    | protein_cc     | chr1  | 1.49E+08 | 1.49E+08 | + | 3830  | 54.51074 | 0.026253 | 0.575411 | 0.193454 | 2.974402 | 0.003688 | 0.025157 | 1 |
| ENSG0000 | mucosal h | Inflamed | ACADM     | protein_cc     | chr1  | 76190036 | 76253260 | + | 4779  | 1306.043 | 0        | 0.500933 | 0.168442 | 2.973926 | 0.003693 | 0.025186 | 1 |
| ENSG0000 | mucosal h | Inflamed | DUOXA1    | protein_cc     | chr15 | 45409569 | 45422136 | - | 3717  | 89.52983 | 0.011933 | -1.06576 | 0.358408 | -2.9736  | 0.003697 | 0.025204 | 1 |
| ENSG0000 | mucosal h | Inflamed | MAGED4    | protein_cc     | chrX  | 51927919 | 51935364 | + | 4809  | 1.725537 | 0.563246 | -0.46166 | 0.155258 | -2.97352 | 0.003698 | 0.025204 | 1 |
| ENSG0000 | mucosal h | Inflamed | ALO20996  | protein_cc     | chr1  | 26145212 | 26147288 | - | 2077  | 22.30788 | 0.016706 | 0.454131 | 0.152732 | 2.973392 | 0.003699 | 0.025207 | 1 |
| ENSG0000 | mucosal h | Inflamed | UBE2FP1   | pseudoger      | chr3  | 37185003 | 37185449 | - | 447   | 28.22912 | 0.019093 | 0.686329 | 0.230921 | 2.972131 | 0.003713 | 0.025295 | 1 |
| ENSG0000 | mucosal h | Inflamed | FAM160A1  | protein_cc     | chr4  | 1.52E+08 | 1.53E+08 | + | 4932  | 555.3771 | 0        | 0.780153 | 0.262497 | 2.972039 | 0.003714 | 0.025295 | 1 |

|          |           |          |           |            |       |          |          |   |       |          |          |          |          |          |          |          |   |
|----------|-----------|----------|-----------|------------|-------|----------|----------|---|-------|----------|----------|----------|----------|----------|----------|----------|---|
| ENSG0000 | mucosal h | Inflamed | MMP23A    | pseudoger  | chr1  | 1631369  | 1633249  | + | 1124  | 3.529833 | 0.274463 | 0.444091 | 0.149428 | 2.971939 | 0.003715 | 0.025296 | 1 |
| ENSG0000 | mucosal h | Inflamed | SYNGR3    | protein_cc | chr16 | 2039661  | 2044276  | + | 3420  | 77.47971 | 0        | -0.50104 | 0.168618 | -2.97143 | 0.003721 | 0.025329 | 1 |
| ENSG0000 | mucosal h | Inflamed | C14orf64  | protein_cc | chr14 | 98391947 | 98444461 | - | 5850  | 55.6611  | 0        | 0.556365 | 0.187253 | 2.971198 | 0.003723 | 0.025336 | 1 |
| ENSG0000 | mucosal h | Inflamed | TOX       | protein_cc | chr8  | 59717977 | 60031767 | - | 4131  | 669.9642 | 0        | 0.495544 | 0.166786 | 2.971128 | 0.003724 | 0.025336 | 1 |
| ENSG0000 | mucosal h | Inflamed | ARV1      | protein_cc | chr1  | 2.31E+08 | 2.31E+08 | + | 1987  | 563.3842 | 0        | 0.385983 | 0.129914 | 2.971075 | 0.003725 | 0.025336 | 1 |
| ENSG0000 | mucosal h | Inflamed | DOCK2     | protein_cc | chr5  | 1.69E+08 | 1.7E+08  | + | 12816 | 2147.623 | 0        | -0.63746 | 0.214566 | -2.97095 | 0.003726 | 0.025339 | 1 |
| ENSG0000 | mucosal h | Inflamed | SPDYA     | protein_cc | chr2  | 29005383 | 29073477 | + | 3483  | 10.61337 | 0.100239 | 0.698234 | 0.235028 | 2.970852 | 0.003727 | 0.025339 | 1 |
| ENSG0000 | mucosal h | Inflamed | RP11-390F | lincRNA    | chr9  | 6645956  | 6670635  | + | 526   | 3.157518 | 0.346062 | -0.54122 | 0.182198 | -2.97051 | 0.003731 | 0.025359 | 1 |
| ENSG0000 | mucosal h | Inflamed | RP11-410E | lincRNA    | chr2  | 1.87E+08 | 1.87E+08 | - | 2202  | 4.570406 | 0.24821  | 0.610089 | 0.205432 | 2.96979  | 0.003739 | 0.025407 | 1 |
| ENSG0000 | mucosal h | Inflamed | LRP6      | protein_cc | chr12 | 12268959 | 12419946 | - | 10337 | 1082.556 | 0        | 0.63984  | 0.21547  | 2.969507 | 0.003742 | 0.025422 | 1 |
| ENSG0000 | mucosal h | Inflamed | RAB42     | protein_cc | chr1  | 28918712 | 28921955 | + | 2180  | 191.6993 | 0        | -0.38762 | 0.130546 | -2.96924 | 0.003745 | 0.025435 | 1 |
| ENSG0000 | mucosal h | Inflamed | EGFL8     | protein_cc | chr6  | 32132360 | 32136058 | + | 2621  | 100.6158 | 0.009547 | 0.707562 | 0.23833  | 2.968839 | 0.00375  | 0.025459 | 1 |
| ENSG0000 | mucosal h | Inflamed | CYCS      | protein_cc | chr7  | 25159710 | 25164980 | - | 4457  | 6574.258 | 0        | 0.510488 | 0.171956 | 2.968711 | 0.003751 | 0.025462 | 1 |
| ENSG0000 | mucosal h | Inflamed | TREH      | protein_cc | chr11 | 1.19E+08 | 1.19E+08 | - | 3181  | 165.1766 | 0.004773 | 0.852512 | 0.287201 | 2.968346 | 0.003755 | 0.025483 | 1 |
| ENSG0000 | mucosal h | Inflamed | LBH       | protein_cc | chr2  | 30454397 | 30546596 | + | 4535  | 923.0931 | 0        | -0.61646 | 0.207688 | -2.96819 | 0.003757 | 0.025489 | 1 |
| ENSG0000 | mucosal h | Inflamed | FAM117A   | protein_cc | chr17 | 47787694 | 47866542 | - | 3836  | 874.0907 | 0        | -0.44704 | 0.150634 | -2.96776 | 0.003762 | 0.025515 | 1 |
| ENSG0000 | mucosal h | Inflamed | ACTB      | protein_cc | chr7  | 5566782  | 5603415  | - | 3256  | 219767.3 | 0        | -0.28858 | 0.097249 | -2.96744 | 0.003765 | 0.025533 | 1 |
| ENSG0000 | mucosal h | Inflamed | COL1A1    | protein_cc | chr17 | 48260650 | 48278993 | - | 9819  | 47200.82 | 0        | -0.96914 | 0.326603 | -2.96734 | 0.003766 | 0.025534 | 1 |
| ENSG0000 | mucosal h | Inflamed | TUBB2A    | protein_cc | chr6  | 3153903  | 3157760  | - | 1727  | 923.8616 | 0        | -0.4113  | 0.138612 | -2.96725 | 0.003767 | 0.025534 | 1 |
| ENSG0000 | mucosal h | Inflamed | KATNAL2   | protein_cc | chr18 | 44497455 | 44627658 | + | 3827  | 48.88067 | 0.009547 | 0.563548 | 0.189936 | 2.967046 | 0.00377  | 0.025543 | 1 |
| ENSG0000 | mucosal h | Inflamed | FAM105A   | protein_cc | chr5  | 14581884 | 14615116 | + | 4074  | 1695.117 | 0        | 0.572748 | 0.193063 | 2.966639 | 0.003774 | 0.025567 | 1 |
| ENSG0000 | mucosal h | Inflamed | RP11-20B7 | lincRNA    | chr3  | 73857752 | 73952017 | + | 782   | 2.828162 | 0.513126 | -0.6945  | 0.234122 | -2.9664  | 0.003777 | 0.025579 | 1 |
| ENSG0000 | mucosal h | Inflamed | RAX       | protein_cc | chr18 | 56934267 | 56941318 | - | 3725  | 6.627685 | 0.632458 | -1.06097 | 0.357745 | -2.96571 | 0.003785 | 0.025621 | 1 |
| ENSG0000 | mucosal h | Inflamed | MIR133A1  | antisense  | chr18 | 19405448 | 19411371 | - | 4376  | 1.355609 | 0.663484 | 0.427688 | 0.144213 | 2.96568  | 0.003785 | 0.025621 | 1 |
| ENSG0000 | mucosal h | Inflamed | RP11-498E | lincRNA    | chr9  | 1.25E+08 | 1.25E+08 | + | 477   | 15.35561 | 0.02148  | 0.515945 | 0.174014 | 2.964955 | 0.003793 | 0.025658 | 1 |
| ENSG0000 | mucosal h | Inflamed | RP11-1109 | lincRNA    | chr12 | 89761584 | 89763078 | + | 1495  | 18.47971 | 0.073986 | 0.741149 | 0.249976 | 2.964874 | 0.003794 | 0.025658 | 1 |
| ENSG0000 | mucosal h | Inflamed | CTD-2383f | antisense  | chr11 | 1.01E+08 | 1.01E+08 | - | 1865  | 3.379475 | 0.300716 | 0.516998 | 0.174376 | 2.96485  | 0.003795 | 0.025658 | 1 |
| ENSG0000 | mucosal h | Inflamed | AC074117  | antisense  | chr2  | 27579113 | 27590489 | + | 3412  | 278.6444 | 0        | 0.420852 | 0.141947 | 2.964849 | 0.003795 | 0.025658 | 1 |
| ENSG0000 | mucosal h | Inflamed | RP11-20D1 | lincRNA    | chr12 | 8940853  | 8948385  | + | 2279  | 11.51074 | 0.126492 | -0.68901 | 0.232478 | -2.96377 | 0.003807 | 0.025734 | 1 |
| ENSG0000 | mucosal h | Inflamed | POU5F1B   | protein_cc | chr8  | 1.28E+08 | 1.28E+08 | + | 5357  | 9.797136 | 0.078759 | 0.642562 | 0.216822 | 2.963548 | 0.003809 | 0.025742 | 1 |
| ENSG0000 | mucosal h | Inflamed | WNT10B    | protein_cc | chr12 | 49359123 | 49365546 | - | 2629  | 66.47733 | 0.009547 | -0.81129 | 0.273761 | -2.96349 | 0.00381  | 0.025742 | 1 |
| ENSG0000 | mucosal h | Inflamed | XXbac-BPC | lincRNA    | chr6  | 31362066 | 31363272 | - | 1207  | 113.673  | 0.002387 | 0.535879 | 0.180838 | 2.963305 | 0.003812 | 0.02575  | 1 |
| ENSG0000 | mucosal h | Inflamed | CDC20     | protein_cc | chr1  | 43824626 | 43828874 | + | 2038  | 1450.888 | 0        | -0.42334 | 0.142867 | -2.96318 | 0.003813 | 0.025753 | 1 |
| ENSG0000 | mucosal h | Inflamed | ABCC6P1   | pseudoger  | chr16 | 18582484 | 18609650 | + | 3431  | 168.9761 | 0.002387 | 0.863129 | 0.291302 | 2.963004 | 0.003815 | 0.02576  | 1 |
| ENSG0000 | mucosal h | Inflamed | ELMSAN1   | protein_cc | chr14 | 74181825 | 74256988 | - | 13484 | 4091.897 | 0        | 0.550972 | 0.186011 | 2.962041 | 0.003826 | 0.025827 | 1 |
| ENSG0000 | mucosal h | Inflamed | TFPI2     | protein_cc | chr7  | 93514709 | 93520303 | - | 2663  | 559.2768 | 0.009547 | -1.37824 | 0.465318 | -2.96194 | 0.003828 | 0.025828 | 1 |
| ENSG0000 | mucosal h | Inflamed | RP11-529f | processed  | chr4  | 88238322 | 88266362 | - | 349   | 1.152745 | 0.72315  | 0.365517 | 0.123413 | 2.961748 | 0.00383  | 0.025836 | 1 |
| ENSG0000 | mucosal h | Inflamed | TAP2      | protein_cc | chr6  | 32789610 | 32806557 | - | 6385  | 2351.212 | 0        | -0.44191 | 0.14922  | -2.96149 | 0.003833 | 0.02585  | 1 |
| ENSG0000 | mucosal h | Inflamed | MAML2     | protein_cc | chr11 | 95709762 | 96076344 | - | 7106  | 819.5107 | 0        | 0.507676 | 0.171461 | 2.960892 | 0.00384  | 0.025885 | 1 |
| ENSG0000 | mucosal h | Inflamed | RP11-135f | antisense  | chr3  | 1.94E+08 | 1.94E+08 | - | 430   | 8.27685  | 0.095465 | 0.639203 | 0.215884 | 2.96086  | 0.00384  | 0.025885 | 1 |

|          |           |          |           |                  |          |          |   |       |          |          |          |          |          |          |          |   |
|----------|-----------|----------|-----------|------------------|----------|----------|---|-------|----------|----------|----------|----------|----------|----------|----------|---|
| ENSG0000 | mucosal h | Inflamed | ABCG2     | protein_cc chr4  | 89011416 | 89152474 | - | 4848  | 1398.375 | 0.002387 | 1.444366 | 0.48786  | 2.960614 | 0.003843 | 0.025897 | 1 |
| ENSG0000 | mucosal h | Inflamed | DRD2      | protein_cc chr11 | 1.13E+08 | 1.13E+08 | - | 4117  | 16.50358 | 0.052506 | 0.70682  | 0.23876  | 2.960375 | 0.003845 | 0.025909 | 1 |
| ENSG0000 | mucosal h | Inflamed | FAM73B    | protein_cc chr9  | 1.32E+08 | 1.32E+08 | + | 6302  | 2511.745 | 0        | 0.379712 | 0.128272 | 2.9602   | 0.003847 | 0.025916 | 1 |
| ENSG0000 | mucosal h | Inflamed | PLEKHH1   | protein_cc chr14 | 68000018 | 68056329 | + | 10817 | 3367.938 | 0        | 0.861697 | 0.291106 | 2.960078 | 0.003849 | 0.025918 | 1 |
| ENSG0000 | mucosal h | Inflamed | BCL2L2    | protein_cc chr14 | 23767999 | 23780968 | + | 4189  | 2405.807 | 0        | 0.306918 | 0.103689 | 2.959995 | 0.00385  | 0.025918 | 1 |
| ENSG0000 | mucosal h | Inflamed | TPK1      | protein_cc chr7  | 1.44E+08 | 1.45E+08 | - | 8436  | 557.6659 | 0        | -0.62629 | 0.211596 | -2.95984 | 0.003852 | 0.025923 | 1 |
| ENSG0000 | mucosal h | Inflamed | CLDN18    | protein_cc chr3  | 1.38E+08 | 1.38E+08 | + | 3877  | 208.8162 | 0.136038 | -1.68474 | 0.569233 | -2.95967 | 0.003854 | 0.02593  | 1 |
| ENSG0000 | mucosal h | Inflamed | CPA3      | protein_cc chr3  | 1.49E+08 | 1.49E+08 | + | 1848  | 1337.613 | 0        | -0.75513 | 0.255173 | -2.9593  | 0.003858 | 0.025952 | 1 |
| ENSG0000 | mucosal h | Inflamed | KANK3     | protein_cc chr19 | 8387468  | 8408146  | - | 3214  | 316.3031 | 0        | -0.63972 | 0.216198 | -2.95897 | 0.003862 | 0.025971 | 1 |
| ENSG0000 | mucosal h | Inflamed | PMCH      | protein_cc chr12 | 1.03E+08 | 1.03E+08 | - | 766   | 1.754177 | 0.689737 | -0.54137 | 0.182972 | -2.95875 | 0.003864 | 0.025982 | 1 |
| ENSG0000 | mucosal h | Inflamed | CDH11     | protein_cc chr16 | 64977656 | 65160015 | - | 9920  | 1930.94  | 0        | -0.70619 | 0.238715 | -2.95829 | 0.003869 | 0.026007 | 1 |
| ENSG0000 | mucosal h | Inflamed | FBXO40    | protein_cc chr3  | 1.21E+08 | 1.21E+08 | + | 5926  | 0.830549 | 0.787589 | -0.35526 | 0.120093 | -2.95824 | 0.00387  | 0.026007 | 1 |
| ENSG0000 | mucosal h | Inflamed | ADAMTS9   | protein_cc chr3  | 64501333 | 64673676 | - | 10693 | 1088.647 | 0        | -0.75018 | 0.253619 | -2.95791 | 0.003874 | 0.026021 | 1 |
| ENSG0000 | mucosal h | Inflamed | RANGRF    | protein_cc chr17 | 8191815  | 8193410  | + | 1577  | 490.2005 | 0        | -0.32903 | 0.111238 | -2.9579  | 0.003874 | 0.026021 | 1 |
| ENSG0000 | mucosal h | Inflamed | RGL4      | protein_cc chr22 | 24030323 | 24041363 | + | 4715  | 63.72792 | 0        | -0.81051 | 0.274032 | -2.95771 | 0.003876 | 0.026029 | 1 |
| ENSG0000 | mucosal h | Inflamed | CD248     | protein_cc chr11 | 66081958 | 66084515 | - | 2558  | 1297.298 | 0        | -0.89523 | 0.302697 | -2.95751 | 0.003878 | 0.026033 | 1 |
| ENSG0000 | mucosal h | Inflamed | SCAMP3    | protein_cc chr1  | 1.55E+08 | 1.55E+08 | - | 2442  | 2112.224 | 0        | -0.21147 | 0.071503 | -2.95749 | 0.003879 | 0.026033 | 1 |
| ENSG0000 | mucosal h | Inflamed | RP11-296A | lincRNA chr1     | 51660767 | 51700768 | - | 2366  | 3.205251 | 0.322196 | -0.44253 | 0.149637 | -2.95735 | 0.00388  | 0.026034 | 1 |
| ENSG0000 | mucosal h | Inflamed | RP11-345M | lincRNA chr16    | 79750622 | 79804460 | - | 1725  | 6.608592 | 0.171838 | 0.533403 | 0.180369 | 2.957295 | 0.003881 | 0.026034 | 1 |
| ENSG0000 | mucosal h | Inflamed | TACR2     | protein_cc chr10 | 71163659 | 71176623 | - | 2871  | 52.27208 | 0        | 0.829996 | 0.280689 | 2.956997 | 0.003884 | 0.026051 | 1 |
| ENSG0000 | mucosal h | Inflamed | RP11-345J | pseudoger chr16  | 29538889 | 29606395 | - | 4387  | 65.19809 | 0        | 0.483317 | 0.163455 | 2.956888 | 0.003886 | 0.026053 | 1 |
| ENSG0000 | mucosal h | Inflamed | CCR8      | protein_cc chr3  | 39371197 | 39375171 | + | 1487  | 16.83771 | 0.145585 | -0.85642 | 0.289646 | -2.95677 | 0.003887 | 0.026055 | 1 |
| ENSG0000 | mucosal h | Inflamed | RP11-341C | antisense chr12  | 1.04E+08 | 1.04E+08 | - | 1063  | 20.06921 | 0.047733 | 0.745098 | 0.252012 | 2.956603 | 0.003889 | 0.026061 | 1 |
| ENSG0000 | mucosal h | Inflamed | UGT3A2    | protein_cc chr5  | 36035119 | 36071460 | - | 2694  | 6.75895  | 0.243437 | -0.64682 | 0.218832 | -2.9558  | 0.003898 | 0.026113 | 1 |
| ENSG0000 | mucosal h | Inflamed | CTB-113D  | antisense chr7   | 29019583 | 29052983 | + | 4916  | 21.44391 | 0.066826 | 0.83231  | 0.281588 | 2.955771 | 0.003899 | 0.026113 | 1 |
| ENSG0000 | mucosal h | Inflamed | AC007255  | antisense chr7   | 29553841 | 29603286 | - | 1440  | 103.3962 | 0.00716  | 0.7857   | 0.265864 | 2.955266 | 0.003904 | 0.026145 | 1 |
| ENSG0000 | mucosal h | Inflamed | LINC00654 | lincRNA chr20    | 5476713  | 5485259  | - | 6294  | 379.3914 | 0        | 0.618534 | 0.20932  | 2.954965 | 0.003908 | 0.026158 | 1 |
| ENSG0000 | mucosal h | Inflamed | OLFM1     | protein_cc chr9  | 1.38E+08 | 1.38E+08 | + | 6123  | 1070.568 | 0        | -0.83731 | 0.283361 | -2.95494 | 0.003908 | 0.026158 | 1 |
| ENSG0000 | mucosal h | Inflamed | RP11-247A | lincRNA chr9     | 1.32E+08 | 1.32E+08 | + | 507   | 4.312649 | 0.286396 | -0.56133 | 0.190005 | -2.95429 | 0.003916 | 0.026201 | 1 |
| ENSG0000 | mucosal h | Inflamed | EMCN      | protein_cc chr4  | 1.01E+08 | 1.02E+08 | - | 5243  | 183.4511 | 0        | -0.64421 | 0.21807  | -2.95413 | 0.003918 | 0.026207 | 1 |
| ENSG0000 | mucosal h | Inflamed | PRR19     | protein_cc chr19 | 42806250 | 42814973 | + | 2575  | 26.19093 | 0.002387 | -0.40228 | 0.136191 | -2.95383 | 0.003921 | 0.026224 | 1 |
| ENSG0000 | mucosal h | Inflamed | SLC25A38  | protein_cc chr3  | 39424839 | 39438842 | + | 2151  | 1532.148 | 0        | 0.247897 | 0.083927 | 2.953734 | 0.003922 | 0.026225 | 1 |
| ENSG0000 | mucosal h | Inflamed | AL031663  | protein_cc chr20 | 44074071 | 44077220 | + | 3150  | 30.28162 | 0.02148  | 0.724112 | 0.245192 | 2.953241 | 0.003928 | 0.026256 | 1 |
| ENSG0000 | mucosal h | Inflamed | ADPRHL2   | protein_cc chr1  | 36554476 | 36559533 | + | 1668  | 899.5728 | 0        | -0.20051 | 0.067908 | -2.95263 | 0.003935 | 0.026297 | 1 |
| ENSG0000 | mucosal h | Inflamed | RP11-127E | lincRNA chr7     | 5465908  | 5468558  | - | 2651  | 16.12411 | 0.01432  | 0.540817 | 0.183171 | 2.952527 | 0.003936 | 0.026299 | 1 |
| ENSG0000 | mucosal h | Inflamed | CTD-3074C | antisense chr11  | 66240961 | 66247704 | - | 2057  | 75.8043  | 0        | 0.384995 | 0.130409 | 2.952215 | 0.00394  | 0.026317 | 1 |
| ENSG0000 | mucosal h | Inflamed | GOLGA7B   | protein_cc chr10 | 99627889 | 99631294 | + | 3406  | 6.439141 | 0.224344 | 0.697102 | 0.236151 | 2.951932 | 0.003943 | 0.026332 | 1 |
| ENSG0000 | mucosal h | Inflamed | PNPLA3    | protein_cc chr22 | 44319619 | 44360368 | + | 3232  | 48.68974 | 0.033413 | -0.86081 | 0.291711 | -2.9509  | 0.003955 | 0.026406 | 1 |
| ENSG0000 | mucosal h | Inflamed | KCNA6     | protein_cc chr12 | 4918342  | 4960277  | + | 5977  | 45.91408 | 0.023866 | 0.707993 | 0.239938 | 2.950738 | 0.003957 | 0.026412 | 1 |
| ENSG0000 | mucosal h | Inflamed | RP11-534L | antisense chr1   | 2.07E+08 | 2.07E+08 | + | 509   | 4.770883 | 0.245823 | 0.590952 | 0.200301 | 2.950324 | 0.003962 | 0.026438 | 1 |

|          |           |          |           |                  |          |          |   |      |          |          |          |          |          |          |          |   |
|----------|-----------|----------|-----------|------------------|----------|----------|---|------|----------|----------|----------|----------|----------|----------|----------|---|
| ENSG0000 | mucosal h | Inflamed | C1orf229  | protein_cc chr1  | 2.47E+08 | 2.47E+08 | - | 2258 | 9.501193 | 0.038186 | 0.560769 | 0.190099 | 2.949884 | 0.003967 | 0.026466 | 1 |
| ENSG0000 | mucosal h | Inflamed | ACOT11    | protein_cc chr1  | 55007930 | 55104865 | + | 9768 | 3332.597 | 0        | 0.607458 | 0.205983 | 2.949073 | 0.003977 | 0.026523 | 1 |
| ENSG0000 | mucosal h | Inflamed | DNAJC22   | protein_cc chr12 | 49740700 | 49751309 | + | 3477 | 893.6229 | 0        | 0.58742  | 0.199197 | 2.948936 | 0.003979 | 0.026527 | 1 |
| ENSG0000 | mucosal h | Inflamed | PVRL3     | protein_cc chr3  | 1.11E+08 | 1.11E+08 | + | 6184 | 899.6587 | 0        | 0.562017 | 0.190613 | 2.948476 | 0.003984 | 0.026557 | 1 |
| ENSG0000 | mucosal h | Inflamed | RAB15     | protein_cc chr14 | 65412532 | 65439494 | - | 4379 | 2460.1   | 0        | 0.477194 | 0.161869 | 2.948026 | 0.003989 | 0.026585 | 1 |
| ENSG0000 | mucosal h | Inflamed | KCNMB2    | protein_cc chr3  | 1.78E+08 | 1.79E+08 | + | 3585 | 7.684964 | 0.150358 | 0.705278 | 0.23925  | 2.94787  | 0.003991 | 0.026588 | 1 |
| ENSG0000 | mucosal h | Inflamed | PAOX      | protein_cc chr10 | 1.35E+08 | 1.35E+08 | + | 2320 | 351.0286 | 0        | -0.2908  | 0.098648 | -2.94783 | 0.003992 | 0.026588 | 1 |
| ENSG0000 | mucosal h | Inflamed | SULT1A2   | protein_cc chr16 | 28603264 | 28608430 | - | 2275 | 661.58   | 0        | 1.061009 | 0.359973 | 2.947469 | 0.003996 | 0.026608 | 1 |
| ENSG0000 | mucosal h | Inflamed | AC005702  | miRNA chr17      | 58119722 | 58119803 | - | 82   | 1.878282 | 0.484487 | 0.427876 | 0.145171 | 2.9474   | 0.003997 | 0.026608 | 1 |
| ENSG0000 | mucosal h | Inflamed | RP1-197B1 | lincRNA chr12    | 48099868 | 48136077 | + | 4024 | 39.44869 | 0        | -0.4461  | 0.151373 | -2.94705 | 0.004001 | 0.026629 | 1 |
| ENSG0000 | mucosal h | Inflamed | MEST      | protein_cc chr7  | 1.3E+08  | 1.3E+08  | + | 4624 | 883.3461 | 0        | 0.486587 | 0.165124 | 2.946791 | 0.004004 | 0.026642 | 1 |
| ENSG0000 | mucosal h | Inflamed | MIR3131   | miRNA chr2       | 2.2E+08  | 2.2E+08  | - | 63   | 8.99284  | 0.126492 | 0.635672 | 0.215731 | 2.9466   | 0.004006 | 0.026649 | 1 |
| ENSG0000 | mucosal h | Inflamed | CD34      | protein_cc chr1  | 2.08E+08 | 2.08E+08 | - | 3949 | 1662.73  | 0        | -0.6896  | 0.234038 | -2.94654 | 0.004007 | 0.026649 | 1 |
| ENSG0000 | mucosal h | Inflamed | RP11-6161 | antisense chr16  | 1256560  | 1257124  | - | 338  | 14.7852  | 0.136038 | 0.809971 | 0.27495  | 2.945881 | 0.004015 | 0.026694 | 1 |
| ENSG0000 | mucosal h | Inflamed | PPDPF     | protein_cc chr20 | 62152077 | 62153559 | + | 1094 | 13327.78 | 0        | 0.392268 | 0.133167 | 2.945683 | 0.004017 | 0.026703 | 1 |
| ENSG0000 | mucosal h | Inflamed | LINC00704 | lincRNA chr10    | 4692377  | 4720346  | - | 1920 | 23.40811 | 0.023866 | 0.758991 | 0.257693 | 2.945333 | 0.004021 | 0.026722 | 1 |
| ENSG0000 | mucosal h | Inflamed | SH3RF2    | protein_cc chr5  | 1.45E+08 | 1.45E+08 | + | 7232 | 2918.363 | 0        | 0.764574 | 0.259596 | 2.945243 | 0.004022 | 0.026722 | 1 |
| ENSG0000 | mucosal h | Inflamed | KCTD11    | protein_cc chr17 | 7255208  | 7258258  | + | 3051 | 1050.597 | 0        | -0.36545 | 0.124085 | -2.9452  | 0.004023 | 0.026722 | 1 |
| ENSG0000 | mucosal h | Inflamed | CLSTN3    | protein_cc chr12 | 7282294  | 7311541  | + | 6865 | 2677.475 | 0        | -0.64312 | 0.218389 | -2.94485 | 0.004027 | 0.026743 | 1 |
| ENSG0000 | mucosal h | Inflamed | CD244     | protein_cc chr1  | 1.61E+08 | 1.61E+08 | - | 2904 | 102.6587 | 0        | -0.46567 | 0.158149 | -2.94448 | 0.004032 | 0.026765 | 1 |
| ENSG0000 | mucosal h | Inflamed | PRKAR2A   | protein_cc chr3  | 48782030 | 48885279 | - | 6644 | 3516.043 | 0        | 0.450865 | 0.153172 | 2.943522 | 0.004043 | 0.026834 | 1 |
| ENSG0000 | mucosal h | Inflamed | SYF2      | protein_cc chr1  | 25549170 | 25558993 | - | 3370 | 1216.783 | 0        | 0.331422 | 0.112604 | 2.943262 | 0.004046 | 0.026848 | 1 |
| ENSG0000 | mucosal h | Inflamed | MAP2K1P1  | pseudoger chr8   | 29885229 | 29886416 | + | 1188 | 1.355609 | 0.637232 | -0.38504 | 0.13083  | -2.94309 | 0.004048 | 0.026852 | 1 |
| ENSG0000 | mucosal h | Inflamed | GABBR2    | protein_cc chr9  | 1.01E+08 | 1.01E+08 | - | 6007 | 17.51551 | 0.143198 | -0.86133 | 0.292671 | -2.943   | 0.004049 | 0.026852 | 1 |
| ENSG0000 | mucosal h | Inflamed | IGHV3-41  | IG_V_pseu chr14  | 1.07E+08 | 1.07E+08 | - | 347  | 2.212411 | 0.553699 | -0.54992 | 0.186859 | -2.94296 | 0.00405  | 0.026852 | 1 |
| ENSG0000 | mucosal h | Inflamed | UGP2      | protein_cc chr2  | 64068074 | 64118696 | + | 6477 | 6403.095 | 0        | 0.597143 | 0.202935 | 2.942538 | 0.004055 | 0.026879 | 1 |
| ENSG0000 | mucosal h | Inflamed | C1QTNF6   | protein_cc chr22 | 37576207 | 37595425 | - | 7143 | 1280.179 | 0        | -0.51817 | 0.176128 | -2.942   | 0.004061 | 0.026911 | 1 |
| ENSG0000 | mucosal h | Inflamed | SIX4      | protein_cc chr14 | 61176246 | 61191066 | - | 6658 | 29.58473 | 0.047733 | -0.96616 | 0.328408 | -2.94196 | 0.004062 | 0.026911 | 1 |
| ENSG0000 | mucosal h | Inflamed | SNX15     | protein_cc chr11 | 64794880 | 64808044 | + | 4915 | 162.957  | 0.004773 | 0.554522 | 0.188504 | 2.941704 | 0.004065 | 0.026921 | 1 |
| ENSG0000 | mucosal h | Inflamed | RPL39L    | protein_cc chr3  | 1.87E+08 | 1.87E+08 | - | 1060 | 107.0788 | 0        | -0.55476 | 0.188591 | -2.94162 | 0.004066 | 0.026921 | 1 |
| ENSG0000 | mucosal h | Inflamed | AP006621  | protein_cc chr11 | 777578   | 784297   | + | 1059 | 75.63723 | 0        | 0.508533 | 0.172877 | 2.941585 | 0.004066 | 0.026921 | 1 |
| ENSG0000 | mucosal h | Inflamed | RP11-21L2 | antisense chr11  | 76493625 | 76494106 | - | 354  | 5.861575 | 0.102625 | 0.492995 | 0.167662 | 2.940414 | 0.00408  | 0.027008 | 1 |
| ENSG0000 | mucosal h | Inflamed | PYGB      | protein_cc chr20 | 25228705 | 25278650 | + | 4474 | 21330.4  | 0        | 0.481657 | 0.163812 | 2.940298 | 0.004082 | 0.02701  | 1 |
| ENSG0000 | mucosal h | Inflamed | CTB-171A  | antisense chr19  | 45135500 | 45222031 | - | 1418 | 68.62768 | 0        | 0.543929 | 0.185009 | 2.940012 | 0.004085 | 0.027026 | 1 |
| ENSG0000 | mucosal h | Inflamed | SLC13A5   | protein_cc chr17 | 6588032  | 6616886  | - | 8982 | 5.606205 | 0.591885 | -1.02216 | 0.347692 | -2.93983 | 0.004087 | 0.027034 | 1 |
| ENSG0000 | mucosal h | Inflamed | SND1      | protein_cc chr7  | 1.27E+08 | 1.28E+08 | + | 6500 | 9752.138 | 0        | -0.26008 | 0.088473 | -2.93967 | 0.004089 | 0.027038 | 1 |
| ENSG0000 | mucosal h | Inflamed | PARD3     | protein_cc chr10 | 34398488 | 35104253 | - | 6513 | 1665.401 | 0        | 0.424355 | 0.144358 | 2.939608 | 0.00409  | 0.027038 | 1 |
| ENSG0000 | mucosal h | Inflamed | TNFSF9    | protein_cc chr19 | 6531010  | 6535931  | + | 1657 | 111.0143 | 0.004773 | -0.88293 | 0.300388 | -2.93929 | 0.004094 | 0.027051 | 1 |
| ENSG0000 | mucosal h | Inflamed | OR7E22P   | pseudoger chr3   | 75405667 | 75406654 | - | 988  | 1.797136 | 0.618138 | 0.557069 | 0.189526 | 2.939278 | 0.004094 | 0.027051 | 1 |
| ENSG0000 | mucosal h | Inflamed | COPS7A    | protein_cc chr12 | 6832907  | 6841041  | + | 3113 | 1670.138 | 0        | -0.1985  | 0.067537 | -2.93914 | 0.004096 | 0.027055 | 1 |

|          |           |          |           |                  |          |          |   |       |          |          |          |          |          |          |          |   |
|----------|-----------|----------|-----------|------------------|----------|----------|---|-------|----------|----------|----------|----------|----------|----------|----------|---|
| ENSG0000 | mucosal h | Inflamed | RNF185    | protein_cc chr22 | 31556168 | 31603005 | + | 3447  | 2261.432 | 0        | 0.248976 | 0.084715 | 2.938964 | 0.004098 | 0.027063 | 1 |
| ENSG0000 | mucosal h | Inflamed | PSENE1    | protein_cc chr19 | 36236015 | 36237911 | + | 1336  | 814.6778 | 0        | -0.36805 | 0.125257 | -2.93837 | 0.004105 | 0.027104 | 1 |
| ENSG0000 | mucosal h | Inflamed | RP11-379F | pseudoger chr3   | 1.58E+08 | 1.58E+08 | + | 323   | 1.190931 | 0.673031 | 0.388701 | 0.132306 | 2.937892 | 0.004111 | 0.027129 | 1 |
| ENSG0000 | mucosal h | Inflamed | TRIP13    | protein_cc chr5  | 892758   | 919472   | + | 3560  | 266.0406 | 0        | -0.43335 | 0.147505 | -2.93788 | 0.004111 | 0.027129 | 1 |
| ENSG0000 | mucosal h | Inflamed | CTD-3051I | lincRNA chr14    | 1.05E+08 | 1.05E+08 | - | 1045  | 10.82578 | 0.169451 | 0.752271 | 0.256086 | 2.937576 | 0.004115 | 0.027144 | 1 |
| ENSG0000 | mucosal h | Inflamed | DLGAP1    | protein_cc chr18 | 3496030  | 4455335  | - | 12109 | 15.34845 | 0.02864  | 0.651804 | 0.221889 | 2.93753  | 0.004115 | 0.027144 | 1 |
| ENSG0000 | mucosal h | Inflamed | AC106876  | protein_cc chr2  | 2.34E+08 | 2.34E+08 | + | 813   | 79.96897 | 0.011933 | 0.663441 | 0.22587  | 2.937272 | 0.004119 | 0.027146 | 1 |
| ENSG0000 | mucosal h | Inflamed | GPC2      | protein_cc chr7  | 99767229 | 99774995 | - | 3828  | 53.96181 | 0.019093 | 0.647747 | 0.220527 | 2.937265 | 0.004119 | 0.027146 | 1 |
| ENSG0000 | mucosal h | Inflamed | FTLP3     | pseudoger chr20  | 4004552  | 4005091  | + | 540   | 181.7661 | 0        | -0.49533 | 0.168636 | -2.93726 | 0.004119 | 0.027146 | 1 |
| ENSG0000 | mucosal h | Inflamed | RAET1G    | protein_cc chr6  | 1.5E+08  | 1.5E+08  | - | 1486  | 9.811456 | 0.057279 | -0.65574 | 0.223329 | -2.93622 | 0.004131 | 0.027222 | 1 |
| ENSG0000 | mucosal h | Inflamed | AGBL2     | protein_cc chr11 | 47681143 | 47736941 | - | 5483  | 58.79236 | 0.011933 | 0.61094  | 0.208104 | 2.93574  | 0.004137 | 0.02724  | 1 |
| ENSG0000 | mucosal h | Inflamed | RASD1     | protein_cc chr17 | 17397751 | 17399709 | - | 1748  | 765.8473 | 0        | 0.851921 | 0.29019  | 2.935729 | 0.004137 | 0.02724  | 1 |
| ENSG0000 | mucosal h | Inflamed | CITED4    | protein_cc chr1  | 41326729 | 41328018 | - | 1290  | 151.6492 | 0        | -0.67618 | 0.23034  | -2.9356  | 0.004139 | 0.02724  | 1 |
| ENSG0000 | mucosal h | Inflamed | NXN       | protein_cc chr17 | 702553   | 883010   | - | 5881  | 913.7589 | 0        | -0.67379 | 0.229523 | -2.93559 | 0.004139 | 0.02724  | 1 |
| ENSG0000 | mucosal h | Inflamed | RRN3P3    | pseudoger chr16  | 22430090 | 22449036 | - | 3269  | 278.7017 | 0        | 0.44988  | 0.153256 | 2.935477 | 0.004141 | 0.02724  | 1 |
| ENSG0000 | mucosal h | Inflamed | AC116366  | antisense chr5   | 1.32E+08 | 1.32E+08 | - | 999   | 10.95227 | 0.064439 | -0.6376  | 0.217208 | -2.93542 | 0.004141 | 0.02724  | 1 |
| ENSG0000 | mucosal h | Inflamed | RP11-375C | lincRNA chr9     | 82120719 | 82147257 | - | 2245  | 1.849642 | 0.572792 | -0.52609 | 0.179221 | -2.93541 | 0.004141 | 0.02724  | 1 |
| ENSG0000 | mucosal h | Inflamed | AC092594  | lincRNA chr2     | 19167729 | 19546509 | - | 2963  | 6.553699 | 0.097852 | 0.53124  | 0.180999 | 2.935039 | 0.004146 | 0.027263 | 1 |
| ENSG0000 | mucosal h | Inflamed | HMGCL     | protein_cc chr1  | 24128375 | 24165110 | - | 5658  | 1867.959 | 0        | 0.340185 | 0.115911 | 2.934876 | 0.004148 | 0.027269 | 1 |
| ENSG0000 | mucosal h | Inflamed | AEBP1     | protein_cc chr7  | 44143960 | 44154161 | + | 4955  | 7456.258 | 0        | -0.75412 | 0.256982 | -2.93453 | 0.004152 | 0.027288 | 1 |
| ENSG0000 | mucosal h | Inflamed | DAP       | protein_cc chr5  | 10679342 | 10761384 | - | 3361  | 7880.74  | 0        | -0.20418 | 0.069581 | -2.93447 | 0.004153 | 0.027288 | 1 |
| ENSG0000 | mucosal h | Inflamed | UQCRC1    | protein_cc chr3  | 48636435 | 48648409 | - | 3236  | 9347.998 | 0        | 0.307848 | 0.104918 | 2.934171 | 0.004157 | 0.027306 | 1 |
| ENSG0000 | mucosal h | Inflamed | AC097724  | antisense chr2   | 28931819 | 28959071 | - | 1438  | 8.77327  | 0.059666 | 0.49947  | 0.170242 | 2.933888 | 0.00416  | 0.027322 | 1 |
| ENSG0000 | mucosal h | Inflamed | RP4-555D  | lincRNA chr3     | 44039573 | 44040641 | - | 1069  | 0.98568  | 0.763723 | -0.43446 | 0.148093 | -2.93372 | 0.004162 | 0.027325 | 1 |
| ENSG0000 | mucosal h | Inflamed | UBA52P6   | pseudoger chr9   | 22012154 | 22012535 | + | 382   | 1.584726 | 0.558473 | -0.40972 | 0.139662 | -2.93368 | 0.004163 | 0.027325 | 1 |
| ENSG0000 | mucosal h | Inflamed | ADD3      | protein_cc chr10 | 1.12E+08 | 1.12E+08 | + | 6541  | 3083.964 | 0        | 0.604823 | 0.206175 | 2.933539 | 0.004164 | 0.02733  | 1 |
| ENSG0000 | mucosal h | Inflamed | RP11-214k | lincRNA chr12    | 1.25E+08 | 1.25E+08 | + | 2835  | 7.267303 | 0.054893 | 0.448865 | 0.153024 | 2.933292 | 0.004167 | 0.027343 | 1 |
| ENSG0000 | mucosal h | Inflamed | RP11-470F | antisense chr9   | 72087382 | 72109429 | + | 442   | 3.286396 | 0.479714 | 0.448494 | 0.15291  | 2.933066 | 0.00417  | 0.027354 | 1 |
| ENSG0000 | mucosal h | Inflamed | TUBG1     | protein_cc chr17 | 40761694 | 40767252 | + | 2411  | 1242.974 | 0        | -0.24379 | 0.083127 | -2.93279 | 0.004174 | 0.027369 | 1 |
| ENSG0000 | mucosal h | Inflamed | ACAA1     | protein_cc chr3  | 38144620 | 38178733 | - | 7106  | 3972.422 | 0        | 0.270105 | 0.0921   | 2.932721 | 0.004175 | 0.027369 | 1 |
| ENSG0000 | mucosal h | Inflamed | STX3      | protein_cc chr11 | 59480929 | 59573354 | + | 7624  | 3808.618 | 0        | 0.512575 | 0.174787 | 2.932568 | 0.004176 | 0.027374 | 1 |
| ENSG0000 | mucosal h | Inflamed | AVIL      | protein_cc chr12 | 58191159 | 58212487 | - | 5889  | 560.1432 | 0        | 0.799683 | 0.272707 | 2.932392 | 0.004179 | 0.027382 | 1 |
| ENSG0000 | mucosal h | Inflamed | SULF2     | protein_cc chr20 | 46285092 | 46415360 | - | 6657  | 7129.613 | 0        | -0.35989 | 0.122737 | -2.93221 | 0.004181 | 0.027389 | 1 |
| ENSG0000 | mucosal h | Inflamed | LRR8E     | protein_cc chr19 | 7953390  | 7966901  | + | 4324  | 248.0453 | 0.002387 | -0.49301 | 0.168168 | -2.93167 | 0.004188 | 0.027421 | 1 |
| ENSG0000 | mucosal h | Inflamed | RP11-768F | lincRNA chr12    | 1.2E+08  | 1.2E+08  | - | 1013  | 4.988067 | 0.116945 | -0.42289 | 0.144252 | -2.93159 | 0.004188 | 0.027421 | 1 |
| ENSG0000 | mucosal h | Inflamed | TBC1D10C  | protein_cc chr11 | 67171386 | 67177560 | + | 5010  | 1059.301 | 0        | -0.66963 | 0.228421 | -2.93157 | 0.004189 | 0.027421 | 1 |
| ENSG0000 | mucosal h | Inflamed | CDH16     | protein_cc chr16 | 66942025 | 66952887 | - | 3656  | 16.66826 | 0.100239 | 0.959554 | 0.32736  | 2.931187 | 0.004193 | 0.027445 | 1 |
| ENSG0000 | mucosal h | Inflamed | KIF12     | protein_cc chr9  | 1.17E+08 | 1.17E+08 | - | 2975  | 523.3079 | 0        | 0.628216 | 0.214353 | 2.930755 | 0.004199 | 0.027467 | 1 |
| ENSG0000 | mucosal h | Inflamed | PRDX1     | protein_cc chr1  | 45976708 | 45988719 | - | 1522  | 6932.759 | 0        | -0.3448  | 0.11765  | -2.93075 | 0.004199 | 0.027467 | 1 |
| ENSG0000 | mucosal h | Inflamed | KCNJ9     | protein_cc chr1  | 1.6E+08  | 1.6E+08  | + | 4170  | 2.441527 | 0.515513 | 0.457612 | 0.156162 | 2.930365 | 0.004204 | 0.027483 | 1 |



|          |           |          |           |                  |          |          |   |       |          |          |          |          |          |          |          |   |
|----------|-----------|----------|-----------|------------------|----------|----------|---|-------|----------|----------|----------|----------|----------|----------|----------|---|
| ENSG0000 | mucosal h | Inflamed | UBE3B     | protein_cc chr12 | 1.1E+08  | 1.1E+08  | + | 12450 | 3088.47  | 0        | 0.306302 | 0.104528 | 2.930341 | 0.004204 | 0.027483 | 1 |
| ENSG0000 | mucosal h | Inflamed | CLCA1     | protein_cc chr1  | 86934051 | 86965972 | + | 3340  | 61617.5  | 0        | 1.754104 | 0.598608 | 2.930304 | 0.004204 | 0.027483 | 1 |
| ENSG0000 | mucosal h | Inflamed | RP11-384C | antisense chr1   | 2.13E+08 | 2.13E+08 | + | 496   | 1.491647 | 0.601432 | 0.432121 | 0.147471 | 2.930207 | 0.004206 | 0.027484 | 1 |
| ENSG0000 | mucosal h | Inflamed | RP3-323P1 | antisense chr6   | 1.34E+08 | 1.34E+08 | - | 3783  | 29.51313 | 0.059666 | 0.904367 | 0.308671 | 2.929871 | 0.00421  | 0.027504 | 1 |
| ENSG0000 | mucosal h | Inflamed | RP11-143k | processed_chr17  | 71161116 | 71192732 | + | 588   | 1.114558 | 0.732697 | 0.351114 | 0.119849 | 2.92964  | 0.004213 | 0.027509 | 1 |
| ENSG0000 | mucosal h | Inflamed | RAB31     | protein_cc chr18 | 9708162  | 9862548  | + | 5586  | 1963.344 | 0        | -0.72926 | 0.248926 | -2.92964 | 0.004213 | 0.027509 | 1 |
| ENSG0000 | mucosal h | Inflamed | TMEM246   | protein_cc chr9  | 1.04E+08 | 1.04E+08 | - | 5568  | 1678.126 | 0        | 0.473106 | 0.161494 | 2.929562 | 0.004214 | 0.027509 | 1 |
| ENSG0000 | mucosal h | Inflamed | RTBDN     | protein_cc chr19 | 12936292 | 12946242 | - | 2675  | 5.97136  | 0.178998 | 0.608957 | 0.20789  | 2.929228 | 0.004218 | 0.027529 | 1 |
| ENSG0000 | mucosal h | Inflamed | IRAK1     | protein_cc chrX  | 1.53E+08 | 1.53E+08 | - | 4001  | 7374.635 | 0        | -0.28357 | 0.096836 | -2.92832 | 0.004229 | 0.027596 | 1 |
| ENSG0000 | mucosal h | Inflamed | SPARC     | protein_cc chr5  | 1.51E+08 | 1.51E+08 | - | 4831  | 22410    | 0        | -0.6994  | 0.238856 | -2.9281  | 0.004232 | 0.027601 | 1 |
| ENSG0000 | mucosal h | Inflamed | RP11-542E | lincRNA chr12    | 67913609 | 67960906 | + | 2284  | 7.575179 | 0.28401  | 0.717351 | 0.244992 | 2.928053 | 0.004233 | 0.027601 | 1 |
| ENSG0000 | mucosal h | Inflamed | MIR3145   | miRNA chr6       | 1.39E+08 | 1.39E+08 | - | 82    | 1.391408 | 0.649165 | 0.384728 | 0.131396 | 2.928007 | 0.004233 | 0.027601 | 1 |
| ENSG0000 | mucosal h | Inflamed | CCDC103   | protein_cc chr17 | 42976510 | 42982758 | + | 3895  | 1.019093 | 0.75179  | -0.3014  | 0.102945 | -2.92781 | 0.004236 | 0.027605 | 1 |
| ENSG0000 | mucosal h | Inflamed | CLEC18B   | protein_cc chr16 | 74442529 | 74455368 | - | 2610  | 14.90931 | 0.066826 | 0.609642 | 0.208226 | 2.92779  | 0.004236 | 0.027605 | 1 |
| ENSG0000 | mucosal h | Inflamed | CD1A      | protein_cc chr1  | 1.58E+08 | 1.58E+08 | + | 2096  | 20.43675 | 0.069212 | -0.7556  | 0.258114 | -2.92739 | 0.004241 | 0.027631 | 1 |
| ENSG0000 | mucosal h | Inflamed | RAB17     | protein_cc chr2  | 2.38E+08 | 2.39E+08 | - | 4783  | 1106.73  | 0        | 0.669561 | 0.228731 | 2.927291 | 0.004242 | 0.027632 | 1 |
| ENSG0000 | mucosal h | Inflamed | MT-TH     | Mt_tRNA chrM     | 12138    | 12206    | + | 69    | 15.36516 | 0.076372 | 0.757757 | 0.25887  | 2.927173 | 0.004244 | 0.027635 | 1 |
| ENSG0000 | mucosal h | Inflamed | RP11-490k | pseudoger chr1   | 31736092 | 31736528 | - | 437   | 9.128878 | 0.140811 | 0.667093 | 0.227919 | 2.926884 | 0.004247 | 0.027652 | 1 |
| ENSG0000 | mucosal h | Inflamed | MYRFL     | protein_cc chr12 | 70219084 | 70352877 | + | 3513  | 115.8115 | 0.016706 | -1.24882 | 0.426811 | -2.92594 | 0.004259 | 0.027722 | 1 |
| ENSG0000 | mucosal h | Inflamed | MYOM1     | protein_cc chr18 | 3066805  | 3220106  | - | 6573  | 102.1098 | 0        | 0.526231 | 0.179866 | 2.925685 | 0.004262 | 0.027736 | 1 |
| ENSG0000 | mucosal h | Inflamed | PCAT6     | antisense chr1   | 2.03E+08 | 2.03E+08 | + | 890   | 42.50597 | 0.002387 | -0.37678 | 0.128805 | -2.92516 | 0.004269 | 0.027772 | 1 |
| ENSG0000 | mucosal h | Inflamed | CMKLR1    | protein_cc chr12 | 1.09E+08 | 1.09E+08 | - | 5690  | 1664.907 | 0        | -0.46942 | 0.160496 | -2.92479 | 0.004274 | 0.027796 | 1 |
| ENSG0000 | mucosal h | Inflamed | ABHD15    | protein_cc chr17 | 27887565 | 27894155 | - | 3592  | 1189.489 | 0        | 0.301057 | 0.102952 | 2.924254 | 0.00428  | 0.027833 | 1 |
| ENSG0000 | mucosal h | Inflamed | ACADSB    | protein_cc chr10 | 1.25E+08 | 1.25E+08 | + | 6256  | 846.4606 | 0        | 0.619469 | 0.211844 | 2.924179 | 0.004281 | 0.027833 | 1 |
| ENSG0000 | mucosal h | Inflamed | GRIP1     | protein_cc chr12 | 66741211 | 67197966 | - | 6378  | 78.75179 | 0.004773 | 0.637373 | 0.217997 | 2.923764 | 0.004287 | 0.02786  | 1 |
| ENSG0000 | mucosal h | Inflamed | NCR3LG1   | protein_cc chr11 | 17373273 | 17398888 | + | 6438  | 720.0597 | 0.011933 | 0.815888 | 0.279152 | 2.922736 | 0.0043   | 0.027938 | 1 |
| ENSG0000 | mucosal h | Inflamed | NXPE2P1   | pseudoger chr11  | 1.14E+08 | 1.14E+08 | - | 726   | 1.00716  | 0.78043  | 0.413537 | 0.141506 | 2.922395 | 0.004304 | 0.027959 | 1 |
| ENSG0000 | mucosal h | Inflamed | CTD-2184C | antisense chr14  | 60706839 | 60715483 | - | 3154  | 10.76134 | 0.078759 | 0.594949 | 0.203591 | 2.922273 | 0.004305 | 0.027962 | 1 |
| ENSG0000 | mucosal h | Inflamed | CPEB3     | protein_cc chr10 | 93806449 | 94050844 | - | 7895  | 312.8329 | 0.00716  | 0.636174 | 0.217714 | 2.922061 | 0.004308 | 0.027972 | 1 |
| ENSG0000 | mucosal h | Inflamed | TNS4      | protein_cc chr17 | 38632080 | 38657849 | - | 4847  | 1798.506 | 0        | -0.92924 | 0.318023 | -2.92194 | 0.00431  | 0.027972 | 1 |
| ENSG0000 | mucosal h | Inflamed | GJA1      | protein_cc chr6  | 1.22E+08 | 1.22E+08 | + | 3037  | 1675.501 | 0        | -0.79697 | 0.272758 | -2.9219  | 0.00431  | 0.027972 | 1 |
| ENSG0000 | mucosal h | Inflamed | KLHDC2    | protein_cc chr14 | 50234326 | 50249909 | + | 3647  | 1402.337 | 0        | 0.322392 | 0.11036  | 2.921285 | 0.004318 | 0.028011 | 1 |
| ENSG0000 | mucosal h | Inflamed | C3orf36   | protein_cc chr3  | 1.34E+08 | 1.34E+08 | - | 1665  | 65.07876 | 0.019093 | -0.70035 | 0.239748 | -2.92119 | 0.004319 | 0.028011 | 1 |
| ENSG0000 | mucosal h | Inflamed | RP11-337C | antisense chr1   | 1.47E+08 | 1.47E+08 | + | 2139  | 45.20525 | 0.02148  | 0.660259 | 0.226025 | 2.921176 | 0.004319 | 0.028011 | 1 |
| ENSG0000 | mucosal h | Inflamed | SPDEF     | protein_cc chr6  | 34505579 | 34524110 | - | 1914  | 2374.78  | 0        | 0.791098 | 0.270826 | 2.921054 | 0.004321 | 0.028014 | 1 |
| ENSG0000 | mucosal h | Inflamed | RP11-38J2 | lincRNA chr1     | 2.06E+08 | 2.06E+08 | - | 965   | 30.51313 | 0.016706 | -0.78312 | 0.268115 | -2.92083 | 0.004324 | 0.028026 | 1 |
| ENSG0000 | mucosal h | Inflamed | LTB       | protein_cc chr6  | 31548302 | 31550299 | - | 1535  | 972.2053 | 0        | -0.77228 | 0.264429 | -2.92057 | 0.004327 | 0.028041 | 1 |
| ENSG0000 | mucosal h | Inflamed | DYRK2     | protein_cc chr12 | 68042118 | 68059186 | + | 9494  | 3665.859 | 0        | 0.625482 | 0.214182 | 2.920334 | 0.00433  | 0.028053 | 1 |
| ENSG0000 | mucosal h | Inflamed | PIM1      | protein_cc chr6  | 37137979 | 37143202 | + | 2977  | 2560.971 | 0        | -0.42204 | 0.14453  | -2.9201  | 0.004333 | 0.028062 | 1 |
| ENSG0000 | mucosal h | Inflamed | RP11-439E | lincRNA chr1     | 2.47E+08 | 2.47E+08 | + | 2968  | 23.19332 | 0.054893 | 0.715137 | 0.244905 | 2.920062 | 0.004334 | 0.028062 | 1 |

|          |           |          |           |                  |          |          |   |       |          |          |          |          |          |          |          |   |
|----------|-----------|----------|-----------|------------------|----------|----------|---|-------|----------|----------|----------|----------|----------|----------|----------|---|
| ENSG0000 | mucosal h | Inflamed | FDCSP     | protein_cc chr4  | 71091788 | 71100969 | + | 566   | 412.1241 | 0.069212 | -1.62005 | 0.554853 | -2.91979 | 0.004337 | 0.028072 | 1 |
| ENSG0000 | mucosal h | Inflamed | RP11-320M | pseudoger chr12  | 4218827  | 4227298  | - | 865   | 10.52506 | 0.054893 | -0.6498  | 0.222551 | -2.91977 | 0.004337 | 0.028072 | 1 |
| ENSG0000 | mucosal h | Inflamed | CATSPERG  | protein_cc chr19 | 38826415 | 38861589 | + | 9283  | 93.86396 | 0.002387 | 0.418887 | 0.143487 | 2.919339 | 0.004343 | 0.028101 | 1 |
| ENSG0000 | mucosal h | Inflamed | RN7SL130I | misc_RNA chr1    | 64121414 | 64121716 | + | 303   | 6.381862 | 0.169451 | 0.578343 | 0.198124 | 2.919097 | 0.004346 | 0.028114 | 1 |
| ENSG0000 | mucosal h | Inflamed | GBP7      | protein_cc chr1  | 89597434 | 89641723 | - | 2454  | 3.064439 | 0.49642  | -0.53064 | 0.181805 | -2.91874 | 0.004351 | 0.028137 | 1 |
| ENSG0000 | mucosal h | Inflamed | RNF166    | protein_cc chr16 | 88762903 | 88772829 | - | 4394  | 1087.597 | 0        | -0.48349 | 0.165664 | -2.91852 | 0.004353 | 0.028148 | 1 |
| ENSG0000 | mucosal h | Inflamed | NXPE2     | protein_cc chr11 | 1.15E+08 | 1.15E+08 | + | 3126  | 275.778  | 0.004773 | 1.073455 | 0.367824 | 2.918393 | 0.004355 | 0.028149 | 1 |
| ENSG0000 | mucosal h | Inflamed | RNASE6    | protein_cc chr14 | 21249210 | 21250626 | + | 1061  | 605.1647 | 0        | -0.52071 | 0.178426 | -2.91834 | 0.004356 | 0.028149 | 1 |
| ENSG0000 | mucosal h | Inflamed | RAB44     | protein_cc chr6  | 36683256 | 36699870 | + | 2747  | 79.7327  | 0.009547 | -0.67131 | 0.230045 | -2.91816 | 0.004358 | 0.028158 | 1 |
| ENSG0000 | mucosal h | Inflamed | TRBC2     | TR_C_gene chr7   | 1.42E+08 | 1.43E+08 | + | 758   | 2177.375 | 0        | -0.61815 | 0.21185  | -2.91788 | 0.004362 | 0.028174 | 1 |
| ENSG0000 | mucosal h | Inflamed | VIL1      | protein_cc chr2  | 2.19E+08 | 2.19E+08 | + | 6920  | 13172.8  | 0        | 0.938232 | 0.321577 | 2.917597 | 0.004365 | 0.02819  | 1 |
| ENSG0000 | mucosal h | Inflamed | EIF3J-AS1 | lincRNA chr15    | 44819455 | 44829121 | - | 3330  | 153.8663 | 0        | 0.421491 | 0.144474 | 2.917414 | 0.004368 | 0.028194 | 1 |
| ENSG0000 | mucosal h | Inflamed | C10orf55  | protein_cc chr10 | 75669727 | 75682535 | - | 2514  | 13.19809 | 0.031026 | -0.63713 | 0.218397 | -2.9173  | 0.004369 | 0.028194 | 1 |
| ENSG0000 | mucosal h | Inflamed | IGLV4-60  | IG_V_gene chr22  | 22516592 | 22517074 | + | 362   | 1038.854 | 0.009547 | -1.29614 | 0.444296 | -2.9173  | 0.004369 | 0.028194 | 1 |
| ENSG0000 | mucosal h | Inflamed | LRR2      | protein_cc chr3  | 46556913 | 46621589 | - | 5622  | 53.60859 | 0.01432  | 0.735059 | 0.252013 | 2.91675  | 0.004376 | 0.028233 | 1 |
| ENSG0000 | mucosal h | Inflamed | EHMT2-AS  | antisense chr6   | 31851538 | 31851831 | + | 223   | 14.43198 | 0.109785 | 0.788964 | 0.270544 | 2.91621  | 0.004383 | 0.028271 | 1 |
| ENSG0000 | mucosal h | Inflamed | AC140481  | pseudoger chr2   | 1.31E+08 | 1.31E+08 | + | 1722  | 2.460621 | 0.486874 | 0.571204 | 0.195882 | 2.916069 | 0.004385 | 0.028276 | 1 |
| ENSG0000 | mucosal h | Inflamed | RNF208    | protein_cc chr9  | 1.4E+08  | 1.4E+08  | - | 1142  | 135.0692 | 0        | 0.401492 | 0.137705 | 2.915604 | 0.004391 | 0.028308 | 1 |
| ENSG0000 | mucosal h | Inflamed | ZFAND2B   | protein_cc chr2  | 2.2E+08  | 2.2E+08  | + | 3396  | 1356.561 | 0        | 0.243495 | 0.083518 | 2.915461 | 0.004393 | 0.028313 | 1 |
| ENSG0000 | mucosal h | Inflamed | MUC16     | protein_cc chr19 | 8959520  | 9092018  | - | 43830 | 47.15513 | 0.169451 | -1.16737 | 0.400428 | -2.91532 | 0.004395 | 0.028318 | 1 |
| ENSG0000 | mucosal h | Inflamed | COX6B2    | protein_cc chr19 | 55860674 | 55866182 | - | 3815  | 245.9857 | 0.002387 | 0.706616 | 0.242417 | 2.914876 | 0.0044   | 0.028348 | 1 |
| ENSG0000 | mucosal h | Inflamed | NOS3      | protein_cc chr7  | 1.51E+08 | 1.51E+08 | + | 5953  | 825.685  | 0        | -0.78844 | 0.270517 | -2.91458 | 0.004404 | 0.028365 | 1 |
| ENSG0000 | mucosal h | Inflamed | ETFB      | protein_cc chr19 | 51848423 | 51869672 | - | 6526  | 1448.42  | 0        | 0.237546 | 0.08151  | 2.914321 | 0.004408 | 0.02838  | 1 |
| ENSG0000 | mucosal h | Inflamed | RP4-536B2 | lincRNA chr16    | 87807094 | 87812980 | - | 802   | 1.417661 | 0.644391 | -0.4327  | 0.148492 | -2.91396 | 0.004412 | 0.028403 | 1 |
| ENSG0000 | mucosal h | Inflamed | WASL      | protein_cc chr7  | 1.23E+08 | 1.23E+08 | - | 4435  | 3789.232 | 0        | 0.579314 | 0.198816 | 2.913813 | 0.004414 | 0.028409 | 1 |
| ENSG0000 | mucosal h | Inflamed | ZNF684    | protein_cc chr1  | 40997233 | 41013841 | + | 3039  | 84.68974 | 0        | 0.557074 | 0.191195 | 2.913637 | 0.004417 | 0.028417 | 1 |
| ENSG0000 | mucosal h | Inflamed | RP11-342M | antisense chr1   | 43300352 | 43312093 | - | 1617  | 8.408115 | 0.033413 | -0.51493 | 0.176742 | -2.91344 | 0.004419 | 0.028426 | 1 |
| ENSG0000 | mucosal h | Inflamed | PDXP      | protein_cc chr22 | 38054734 | 38062941 | + | 2203  | 101.6683 | 0        | 0.477653 | 0.163953 | 2.913353 | 0.00442  | 0.028426 | 1 |
| ENSG0000 | mucosal h | Inflamed | KCNV1     | protein_cc chr8  | 1.11E+08 | 1.11E+08 | - | 6979  | 58.43675 | 0.116945 | 1.047586 | 0.359609 | 2.913126 | 0.004423 | 0.028438 | 1 |
| ENSG0000 | mucosal h | Inflamed | GNA11     | protein_cc chr19 | 3094408  | 3124002  | + | 6242  | 13821.31 | 0        | 0.523792 | 0.179815 | 2.912953 | 0.004425 | 0.028446 | 1 |
| ENSG0000 | mucosal h | Inflamed | IL16      | protein_cc chr15 | 81451916 | 81605104 | + | 10875 | 2563.768 | 0        | -0.5922  | 0.203373 | -2.91188 | 0.004439 | 0.028529 | 1 |
| ENSG0000 | mucosal h | Inflamed | TMEM88    | protein_cc chr17 | 7758383  | 7759417  | + | 875   | 95.45346 | 0        | -0.43043 | 0.147823 | -2.91179 | 0.004441 | 0.02853  | 1 |
| ENSG0000 | mucosal h | Inflamed | RP11-1391 | antisense chr11  | 856880   | 859795   | - | 2061  | 5.338902 | 0.167064 | 0.542435 | 0.186321 | 2.911289 | 0.004447 | 0.028565 | 1 |
| ENSG0000 | mucosal h | Inflamed | MT-TS1    | Mt_tRNA chrM     | 7446     | 7514     | - | 69    | 33.23866 | 0.042959 | 0.66898  | 0.229797 | 2.911184 | 0.004449 | 0.028567 | 1 |
| ENSG0000 | mucosal h | Inflamed | AMER2     | protein_cc chr13 | 25735822 | 25746426 | - | 10605 | 3.031026 | 0.568019 | -0.68847 | 0.236506 | -2.91101 | 0.004451 | 0.028574 | 1 |
| ENSG0000 | mucosal h | Inflamed | CTD-2184I | antisense chr15  | 52348872 | 52392720 | - | 635   | 0.899761 | 0.792363 | -0.42703 | 0.146702 | -2.91085 | 0.004453 | 0.028581 | 1 |
| ENSG0000 | mucosal h | Inflamed | RP11-46A1 | antisense chr1   | 1.81E+08 | 1.81E+08 | - | 2424  | 26.03341 | 0.02148  | 0.504482 | 0.173317 | 2.91075  | 0.004454 | 0.028582 | 1 |
| ENSG0000 | mucosal h | Inflamed | CD300LB   | protein_cc chr17 | 72517313 | 72527613 | - | 2720  | 103.2888 | 0.002387 | -0.66936 | 0.23     | -2.91024 | 0.004461 | 0.028618 | 1 |
| ENSG0000 | mucosal h | Inflamed | STYK1     | protein_cc chr12 | 10771538 | 10826917 | - | 3424  | 698.9332 | 0        | 0.741508 | 0.254836 | 2.909745 | 0.004467 | 0.028653 | 1 |
| ENSG0000 | mucosal h | Inflamed | ARG2      | protein_cc chr14 | 68086515 | 68118437 | + | 2418  | 99.99523 | 0        | -0.63669 | 0.218829 | -2.90955 | 0.00447  | 0.028662 | 1 |

|          |           |          |           |            |       |          |          |   |       |          |          |          |          |          |          |          |   |
|----------|-----------|----------|-----------|------------|-------|----------|----------|---|-------|----------|----------|----------|----------|----------|----------|----------|---|
| ENSG0000 | mucosal h | Inflamed | RP11-379k | pseudoger  | chr3  | 1.7E+08  | 1.7E+08  | + | 708   | 0.983294 | 0.75179  | 0.375432 | 0.129044 | 2.909344 | 0.004473 | 0.028673 | 1 |
| ENSG0000 | mucosal h | Inflamed | FAR2      | protein_cc | chr12 | 29302036 | 29493913 | + | 5411  | 1459.234 | 0        | 0.546227 | 0.187763 | 2.909128 | 0.004476 | 0.028684 | 1 |
| ENSG0000 | mucosal h | Inflamed | PDHA1     | protein_cc | chrX  | 19362011 | 19379823 | + | 4493  | 3532.363 | 0        | 0.356382 | 0.122526 | 2.908618 | 0.004482 | 0.02872  | 1 |
| ENSG0000 | mucosal h | Inflamed | WRNIP1    | protein_cc | chr6  | 2765648  | 2787186  | + | 3877  | 1834.189 | 0        | 0.241135 | 0.082921 | 2.907998 | 0.00449  | 0.028766 | 1 |
| ENSG0000 | mucosal h | Inflamed | PTGES3L   | protein_cc | chr17 | 41120105 | 41132545 | - | 2951  | 37.05489 | 0        | 0.351715 | 0.120956 | 2.907789 | 0.004493 | 0.028776 | 1 |
| ENSG0000 | mucosal h | Inflamed | DEPDC5    | protein_cc | chr22 | 32149944 | 32303012 | + | 8587  | 946.9952 | 0        | 0.370161 | 0.127327 | 2.907167 | 0.004501 | 0.028816 | 1 |
| ENSG0000 | mucosal h | Inflamed | SAA2-SAA2 | processed  | chr11 | 18252970 | 18270182 | - | 743   | 1.849642 | 0.642005 | -0.5535  | 0.190394 | -2.90716 | 0.004502 | 0.028816 | 1 |
| ENSG0000 | mucosal h | Inflamed | LINC00539 | lincRNA    | chr13 | 21877654 | 21922860 | - | 1859  | 12.46301 | 0.019093 | -0.61157 | 0.210385 | -2.90692 | 0.004505 | 0.028826 | 1 |
| ENSG0000 | mucosal h | Inflamed | ETFDH     | protein_cc | chr4  | 1.6E+08  | 1.6E+08  | + | 4493  | 1232.37  | 0        | 0.50948  | 0.175267 | 2.906874 | 0.004505 | 0.028826 | 1 |
| ENSG0000 | mucosal h | Inflamed | DTNB      | protein_cc | chr2  | 25600067 | 25896503 | - | 7156  | 202.3174 | 0        | -0.34957 | 0.120301 | -2.9058  | 0.00452  | 0.02891  | 1 |
| ENSG0000 | mucosal h | Inflamed | GPRC5B    | protein_cc | chr16 | 19868616 | 19897489 | - | 6064  | 785.6587 | 0        | -0.61965 | 0.213324 | -2.90477 | 0.004533 | 0.028985 | 1 |
| ENSG0000 | mucosal h | Inflamed | CLSTN2    | protein_cc | chr3  | 1.4E+08  | 1.4E+08  | + | 14596 | 194.8473 | 0.009547 | 0.841556 | 0.289717 | 2.904746 | 0.004534 | 0.028985 | 1 |
| ENSG0000 | mucosal h | Inflamed | RP11-6771 | antisense  | chr11 | 1.25E+08 | 1.25E+08 | + | 4854  | 42.55609 | 0.016706 | 0.711984 | 0.245164 | 2.904109 | 0.004542 | 0.029033 | 1 |
| ENSG0000 | mucosal h | Inflamed | TMEM132   | protein_cc | chr12 | 1.3E+08  | 1.3E+08  | - | 7075  | 13.3222  | 0.095465 | 0.746681 | 0.257178 | 2.903363 | 0.004552 | 0.029089 | 1 |
| ENSG0000 | mucosal h | Inflamed | CXCR2P1   | pseudoger  | chr2  | 2.19E+08 | 2.19E+08 | - | 2503  | 187.5084 | 0        | -0.85941 | 0.296031 | -2.9031  | 0.004556 | 0.029098 | 1 |
| ENSG0000 | mucosal h | Inflamed | TPD52L2   | protein_cc | chr20 | 62496596 | 62522898 | + | 4679  | 4273.031 | 0        | -0.21088 | 0.072638 | -2.9031  | 0.004556 | 0.029098 | 1 |
| ENSG0000 | mucosal h | Inflamed | ABCG4     | protein_cc | chr11 | 1.19E+08 | 1.19E+08 | + | 6268  | 17.40334 | 0.033413 | -0.61588 | 0.212191 | -2.90247 | 0.004564 | 0.029145 | 1 |
| ENSG0000 | mucosal h | Inflamed | STON2     | protein_cc | chr14 | 81727000 | 81902809 | - | 6675  | 206.1551 | 0        | 0.575175 | 0.198198 | 2.902023 | 0.00457  | 0.029172 | 1 |
| ENSG0000 | mucosal h | Inflamed | C6orf203  | protein_cc | chr6  | 1.07E+08 | 1.07E+08 | + | 2046  | 484.9141 | 0        | 0.3386   | 0.11668  | 2.90196  | 0.004571 | 0.029172 | 1 |
| ENSG0000 | mucosal h | Inflamed | PARVG     | protein_cc | chr22 | 44568836 | 44615413 | + | 8677  | 1116.136 | 0        | -0.60472 | 0.208393 | -2.90183 | 0.004573 | 0.029172 | 1 |
| ENSG0000 | mucosal h | Inflamed | AC090587  | antisense  | chr11 | 3875548  | 3876739  | - | 494   | 7.642005 | 0.02148  | -0.39932 | 0.13761  | -2.90182 | 0.004573 | 0.029172 | 1 |
| ENSG0000 | mucosal h | Inflamed | DPYSL4    | protein_cc | chr10 | 1.34E+08 | 1.34E+08 | + | 3176  | 36.4105  | 0.045346 | -0.90706 | 0.312678 | -2.90092 | 0.004585 | 0.029242 | 1 |
| ENSG0000 | mucosal h | Inflamed | CNPY3     | protein_cc | chr6  | 42896938 | 42907025 | + | 1704  | 1789.208 | 0        | -0.32588 | 0.11236  | -2.90034 | 0.004593 | 0.029281 | 1 |
| ENSG0000 | mucosal h | Inflamed | MOV10L1   | protein_cc | chr22 | 50528308 | 50600119 | + | 6872  | 29.83532 | 0.088305 | -0.95612 | 0.329661 | -2.9003  | 0.004593 | 0.029281 | 1 |
| ENSG0000 | mucosal h | Inflamed | HRCT1     | protein_cc | chr9  | 35906189 | 35907138 | + | 950   | 598.8807 | 0        | 0.841385 | 0.290113 | 2.900198 | 0.004595 | 0.029283 | 1 |
| ENSG0000 | mucosal h | Inflamed | LRRK2     | protein_cc | chr12 | 40590546 | 40763087 | + | 13465 | 318.2888 | 0.002387 | -0.92475 | 0.318888 | -2.89993 | 0.004598 | 0.029299 | 1 |
| ENSG0000 | mucosal h | Inflamed | DAB2IP    | protein_cc | chr9  | 1.24E+08 | 1.25E+08 | + | 8408  | 8616.451 | 0        | 0.453287 | 0.15633  | 2.899555 | 0.004603 | 0.029324 | 1 |
| ENSG0000 | mucosal h | Inflamed | CMBL      | protein_cc | chr5  | 10275987 | 10308138 | - | 3324  | 4405.444 | 0        | 0.655075 | 0.225976 | 2.898866 | 0.004613 | 0.029376 | 1 |
| ENSG0000 | mucosal h | Inflamed | GRM7      | protein_cc | chr3  | 6811688  | 7783215  | + | 8209  | 4.529833 | 0.221957 | 0.519081 | 0.179076 | 2.898661 | 0.004615 | 0.029387 | 1 |
| ENSG0000 | mucosal h | Inflamed | AKAP5     | protein_cc | chr14 | 64932217 | 64941221 | + | 7512  | 404.5179 | 0        | 0.779846 | 0.269044 | 2.898578 | 0.004617 | 0.029387 | 1 |
| ENSG0000 | mucosal h | Inflamed | FCRL2     | protein_cc | chr1  | 1.58E+08 | 1.58E+08 | - | 5058  | 416.4081 | 0        | -0.99977 | 0.344985 | -2.89801 | 0.004624 | 0.029429 | 1 |
| ENSG0000 | mucosal h | Inflamed | AICDA     | protein_cc | chr12 | 8754762  | 8765467  | - | 3115  | 23       | 0.310263 | -1.19894 | 0.413763 | -2.89765 | 0.004629 | 0.029452 | 1 |
| ENSG0000 | mucosal h | Inflamed | GGH       | protein_cc | chr8  | 63927638 | 63951730 | - | 3130  | 920.9618 | 0        | 0.467313 | 0.161277 | 2.897577 | 0.00463  | 0.029452 | 1 |
| ENSG0000 | mucosal h | Inflamed | COL1A2    | protein_cc | chr7  | 94023873 | 94060544 | + | 11151 | 40900    | 0        | -0.79677 | 0.274995 | -2.89741 | 0.004632 | 0.029456 | 1 |
| ENSG0000 | mucosal h | Inflamed | PPP2R3A   | protein_cc | chr3  | 1.36E+08 | 1.36E+08 | + | 7839  | 363.0406 | 0.002387 | 0.802366 | 0.27693  | 2.897363 | 0.004633 | 0.029456 | 1 |
| ENSG0000 | mucosal h | Inflamed | AKR1D1    | protein_cc | chr7  | 1.38E+08 | 1.38E+08 | + | 3093  | 4.300716 | 0.329356 | -0.57607 | 0.198845 | -2.89707 | 0.004637 | 0.029464 | 1 |
| ENSG0000 | mucosal h | Inflamed | CTD-2541f | antisense  | chr8  | 6475996  | 6565730  | - | 3046  | 14.88783 | 0.047733 | 0.556653 | 0.192145 | 2.897052 | 0.004637 | 0.029464 | 1 |
| ENSG0000 | mucosal h | Inflamed | GPN2      | protein_cc | chr1  | 27202624 | 27216788 | - | 4979  | 1391.334 | 0        | 0.167121 | 0.057687 | 2.89703  | 0.004638 | 0.029464 | 1 |
| ENSG0000 | mucosal h | Inflamed | PCDH19    | protein_cc | chrX  | 99546642 | 99665271 | - | 9756  | 277.6897 | 0.002387 | 0.922765 | 0.31854  | 2.896855 | 0.00464  | 0.029472 | 1 |
| ENSG0000 | mucosal h | Inflamed | ARHGEF28  | protein_cc | chr5  | 72921983 | 73237818 | + | 15617 | 433.6826 | 0        | 0.514865 | 0.17776  | 2.896404 | 0.004646 | 0.029504 | 1 |

|          |           |          |           |                  |          |          |   |       |          |          |          |          |          |          |          |   |
|----------|-----------|----------|-----------|------------------|----------|----------|---|-------|----------|----------|----------|----------|----------|----------|----------|---|
| ENSG0000 | mucosal h | Inflamed | XKR5      | processed_chr8   | 6666038  | 6693166  | - | 5032  | 3.875895 | 0.360382 | -0.60253 | 0.208073 | -2.89577 | 0.004655 | 0.029552 | 1 |
| ENSG0000 | mucosal h | Inflamed | CRIP2     | protein_cc chr14 | 1.06E+08 | 1.06E+08 | + | 4829  | 1600.06  | 0        | -0.66991 | 0.231363 | -2.89547 | 0.004659 | 0.02957  | 1 |
| ENSG0000 | mucosal h | Inflamed | F2R       | protein_cc chr5  | 76011868 | 76031606 | + | 4066  | 1654.344 | 0        | -0.61289 | 0.211683 | -2.89531 | 0.004661 | 0.029577 | 1 |
| ENSG0000 | mucosal h | Inflamed | CEBPD     | protein_cc chr8  | 48649471 | 48651648 | - | 2178  | 2404.036 | 0        | -0.52045 | 0.179772 | -2.89502 | 0.004665 | 0.029595 | 1 |
| ENSG0000 | mucosal h | Inflamed | APOBR     | protein_cc chr16 | 28505970 | 28510291 | + | 3792  | 7096.74  | 0        | 0.434465 | 0.150078 | 2.894929 | 0.004666 | 0.029596 | 1 |
| ENSG0000 | mucosal h | Inflamed | PTCRA     | protein_cc chr6  | 42883727 | 42893573 | + | 1123  | 9.346062 | 0.047733 | -0.63031 | 0.217746 | -2.89468 | 0.00467  | 0.02961  | 1 |
| ENSG0000 | mucosal h | Inflamed | FN3K      | protein_cc chr17 | 80693451 | 80709073 | + | 3872  | 930.432  | 0        | 0.545105 | 0.188321 | 2.894554 | 0.004671 | 0.029614 | 1 |
| ENSG0000 | mucosal h | Inflamed | INADL     | protein_cc chr1  | 62208149 | 62629592 | + | 11456 | 1918.893 | 0        | 0.662114 | 0.228823 | 2.89356  | 0.004685 | 0.029693 | 1 |
| ENSG0000 | mucosal h | Inflamed | RP11-181E | lincRNA chr2     | 1.12E+08 | 1.12E+08 | - | 1482  | 5.157518 | 0.362768 | -0.68123 | 0.235448 | -2.89333 | 0.004688 | 0.029706 | 1 |
| ENSG0000 | mucosal h | Inflamed | RFX6      | protein_cc chr6  | 1.17E+08 | 1.17E+08 | + | 4093  | 30.11933 | 0.054893 | 0.946449 | 0.327138 | 2.893122 | 0.004691 | 0.029717 | 1 |
| ENSG0000 | mucosal h | Inflamed | LGALS1    | protein_cc chr22 | 38071615 | 38075813 | + | 1099  | 3500.754 | 0        | -0.68799 | 0.237813 | -2.89301 | 0.004693 | 0.02972  | 1 |
| ENSG0000 | mucosal h | Inflamed | EIF4E2    | protein_cc chr2  | 2.33E+08 | 2.33E+08 | + | 7177  | 2891.222 | 0        | 0.261996 | 0.090569 | 2.892763 | 0.004696 | 0.029734 | 1 |
| ENSG0000 | mucosal h | Inflamed | TRAM2     | protein_cc chr6  | 52362200 | 52441713 | - | 6908  | 6144.842 | 0        | -0.42444 | 0.146742 | -2.89241 | 0.004701 | 0.029751 | 1 |
| ENSG0000 | mucosal h | Inflamed | RP11-84G  | antisense chr12  | 80328681 | 80334448 | + | 1190  | 12.75895 | 0.052506 | 0.59012  | 0.204025 | 2.892382 | 0.004701 | 0.029751 | 1 |
| ENSG0000 | mucosal h | Inflamed | CTSV      | protein_cc chr9  | 99794940 | 99801925 | - | 1721  | 112.4368 | 0.004773 | 0.949903 | 0.328431 | 2.892247 | 0.004703 | 0.029751 | 1 |
| ENSG0000 | mucosal h | Inflamed | GUCY2C    | protein_cc chr12 | 14765576 | 14849519 | - | 4167  | 2425.296 | 0        | 0.909927 | 0.31461  | 2.892241 | 0.004703 | 0.029751 | 1 |
| ENSG0000 | mucosal h | Inflamed | ERGIC1    | protein_cc chr5  | 1.72E+08 | 1.72E+08 | + | 14139 | 13711.26 | 0        | 0.240124 | 0.083026 | 2.892142 | 0.004704 | 0.029752 | 1 |
| ENSG0000 | mucosal h | Inflamed | MRPL55    | protein_cc chr1  | 2.28E+08 | 2.28E+08 | - | 1886  | 625.7924 | 0        | -0.2725  | 0.094228 | -2.89188 | 0.004708 | 0.029768 | 1 |
| ENSG0000 | mucosal h | Inflamed | IL22      | protein_cc chr12 | 68642022 | 68647387 | - | 1175  | 8.892601 | 0.460621 | -0.9018  | 0.311863 | -2.89167 | 0.004711 | 0.029773 | 1 |
| ENSG0000 | mucosal h | Inflamed | MTM1      | protein_cc chrX  | 1.5E+08  | 1.5E+08  | + | 4048  | 902.1169 | 0        | 0.698654 | 0.24161  | 2.89166  | 0.004711 | 0.029773 | 1 |
| ENSG0000 | mucosal h | Inflamed | LINC00565 | lincRNA chr13    | 1.15E+08 | 1.15E+08 | - | 2331  | 10.31504 | 0.174224 | -0.70235 | 0.242969 | -2.89071 | 0.004724 | 0.02983  | 1 |
| ENSG0000 | mucosal h | Inflamed | FAM219B   | protein_cc chr15 | 75192328 | 75199462 | - | 5258  | 2006.064 | 0        | 0.319496 | 0.110526 | 2.890676 | 0.004725 | 0.02983  | 1 |
| ENSG0000 | mucosal h | Inflamed | OMP       | protein_cc chr11 | 76813886 | 76814377 | + | 492   | 36.95704 | 0.02148  | 0.695798 | 0.240713 | 2.890573 | 0.004726 | 0.02983  | 1 |
| ENSG0000 | mucosal h | Inflamed | PPT1      | protein_cc chr1  | 40538379 | 40563375 | - | 3304  | 2280.064 | 0        | -0.44798 | 0.15498  | -2.89055 | 0.004726 | 0.02983  | 1 |
| ENSG0000 | mucosal h | Inflamed | LINC00242 | lincRNA chr6     | 1.7E+08  | 1.7E+08  | - | 2418  | 17.03819 | 0.026253 | -0.55298 | 0.191309 | -2.89052 | 0.004727 | 0.02983  | 1 |
| ENSG0000 | mucosal h | Inflamed | CAPN2     | protein_cc chr1  | 2.24E+08 | 2.24E+08 | + | 8792  | 15528.97 | 0        | 0.394191 | 0.136375 | 2.890498 | 0.004727 | 0.02983  | 1 |
| ENSG0000 | mucosal h | Inflamed | AF127577  | lincRNA chr21    | 16439391 | 16440158 | + | 446   | 0.804296 | 0.782816 | 0.265828 | 0.091968 | 2.89043  | 0.004728 | 0.02983  | 1 |
| ENSG0000 | mucosal h | Inflamed | FAM83F    | protein_cc chr22 | 40390953 | 40439533 | + | 16389 | 2579.544 | 0        | 0.747135 | 0.258494 | 2.890341 | 0.004729 | 0.029831 | 1 |
| ENSG0000 | mucosal h | Inflamed | OCEL1     | protein_cc chr19 | 17337013 | 17340028 | + | 1867  | 986.3484 | 0        | 0.304618 | 0.105402 | 2.890063 | 0.004733 | 0.029848 | 1 |
| ENSG0000 | mucosal h | Inflamed | LEF1-AS1  | processed_chr4   | 1.09E+08 | 1.09E+08 | + | 4799  | 9.637232 | 0.059666 | -0.49685 | 0.171929 | -2.88982 | 0.004737 | 0.029862 | 1 |
| ENSG0000 | mucosal h | Inflamed | MIR155HC  | lincRNA chr21    | 26934221 | 26947480 | + | 1600  | 91.08831 | 0        | -0.86055 | 0.297795 | -2.88973 | 0.004738 | 0.029863 | 1 |
| ENSG0000 | mucosal h | Inflamed | AC009014  | lincRNA chr5     | 1.36E+08 | 1.36E+08 | - | 1667  | 383.8926 | 0.009547 | 0.964421 | 0.333829 | 2.888969 | 0.004748 | 0.029922 | 1 |
| ENSG0000 | mucosal h | Inflamed | LINC01004 | antisense chr7   | 1.05E+08 | 1.05E+08 | - | 1131  | 88.71838 | 0.002387 | 0.80889  | 0.280024 | 2.888646 | 0.004753 | 0.029944 | 1 |
| ENSG0000 | mucosal h | Inflamed | SNCG      | protein_cc chr10 | 88718375 | 88723017 | + | 1247  | 71.61098 | 0.002387 | -0.68199 | 0.236205 | -2.88728 | 0.004772 | 0.030053 | 1 |
| ENSG0000 | mucosal h | Inflamed | CLEC1A    | protein_cc chr12 | 10222153 | 10264226 | - | 3169  | 93.96181 | 0.004773 | -0.65865 | 0.228131 | -2.88717 | 0.004773 | 0.030053 | 1 |
| ENSG0000 | mucosal h | Inflamed | IL10      | protein_cc chr1  | 2.07E+08 | 2.07E+08 | - | 1978  | 50.62053 | 0        | -0.67504 | 0.23381  | -2.88714 | 0.004774 | 0.030053 | 1 |
| ENSG0000 | mucosal h | Inflamed | AC046143  | antisense chr3   | 1.94E+08 | 1.94E+08 | + | 972   | 43.7494  | 0        | 0.461203 | 0.159748 | 2.887072 | 0.004775 | 0.030053 | 1 |
| ENSG0000 | mucosal h | Inflamed | ZC3H12B   | protein_cc chrX  | 64708615 | 64727767 | + | 7256  | 99.06921 | 0.009547 | 0.682199 | 0.236332 | 2.886608 | 0.004781 | 0.030087 | 1 |
| ENSG0000 | mucosal h | Inflamed | GIMAP6    | protein_cc chr7  | 1.5E+08  | 1.5E+08  | - | 3440  | 1309.986 | 0        | -0.49654 | 0.172028 | -2.88637 | 0.004785 | 0.0301   | 1 |
| ENSG0000 | mucosal h | Inflamed | CTD-2192J | sense_intr chr19 | 12640582 | 12643787 | - | 533   | 4.937947 | 0.210024 | 0.530017 | 0.18366  | 2.885853 | 0.004792 | 0.030127 | 1 |

|          |           |          |           |                  |          |          |   |       |          |          |          |          |          |          |          |   |
|----------|-----------|----------|-----------|------------------|----------|----------|---|-------|----------|----------|----------|----------|----------|----------|----------|---|
| ENSG0000 | mucosal h | Inflamed | MAK       | protein_cc chr6  | 10762956 | 10838764 | - | 4378  | 7.840095 | 0.348449 | -0.93634 | 0.32446  | -2.88584 | 0.004792 | 0.030127 | 1 |
| ENSG0000 | mucosal h | Inflamed | RAB3IP    | protein_cc chr12 | 70132461 | 70216984 | + | 12612 | 634.7017 | 0        | 0.526297 | 0.182375 | 2.885798 | 0.004793 | 0.030127 | 1 |
| ENSG0000 | mucosal h | Inflamed | IGHEP1    | IG_C_pseu chr14  | 1.06E+08 | 1.06E+08 | - | 745   | 1.892601 | 0.630072 | -0.49624 | 0.171964 | -2.88572 | 0.004794 | 0.030127 | 1 |
| ENSG0000 | mucosal h | Inflamed | ASAP2     | protein_cc chr2  | 9346894  | 9545812  | + | 7248  | 2953.921 | 0        | 0.576874 | 0.19991  | 2.885663 | 0.004795 | 0.030127 | 1 |
| ENSG0000 | mucosal h | Inflamed | KIAA1958  | protein_cc chr9  | 1.15E+08 | 1.15E+08 | + | 13119 | 266.2482 | 0.002387 | 0.497726 | 0.1725   | 2.885365 | 0.004799 | 0.030146 | 1 |
| ENSG0000 | mucosal h | Inflamed | IGHJ6     | IG_J_gene chr14  | 1.06E+08 | 1.06E+08 | - | 61    | 263.58   | 0.011933 | -1.00198 | 0.347401 | -2.88422 | 0.004815 | 0.03024  | 1 |
| ENSG0000 | mucosal h | Inflamed | CHIA      | protein_cc chr1  | 1.12E+08 | 1.12E+08 | + | 4632  | 1.324582 | 0.756563 | -0.46497 | 0.16126  | -2.88336 | 0.004827 | 0.030302 | 1 |
| ENSG0000 | mucosal h | Inflamed | BRSK1     | protein_cc chr19 | 55793440 | 55823901 | + | 3841  | 134.9666 | 0        | -0.64986 | 0.225383 | -2.88336 | 0.004827 | 0.030302 | 1 |
| ENSG0000 | mucosal h | Inflamed | AC069154  | pseudoger chr2   | 1.2E+08  | 1.2E+08  | + | 548   | 0.863962 | 0.797136 | 0.32205  | 0.111696 | 2.883258 | 0.004828 | 0.030303 | 1 |
| ENSG0000 | mucosal h | Inflamed | RP11-550A | antisense chr8   | 1.26E+08 | 1.26E+08 | - | 722   | 2.601432 | 0.494033 | 0.595148 | 0.206427 | 2.883089 | 0.004831 | 0.030304 | 1 |
| ENSG0000 | mucosal h | Inflamed | MSRB1     | protein_cc chr16 | 1988211  | 1993327  | - | 2157  | 1192.236 | 0        | -0.41236 | 0.143029 | -2.88308 | 0.004831 | 0.030304 | 1 |
| ENSG0000 | mucosal h | Inflamed | C12orf55  | protein_cc chr12 | 96883349 | 97269333 | + | 12719 | 40.63484 | 0.009547 | -0.79214 | 0.274807 | -2.88251 | 0.004839 | 0.030344 | 1 |
| ENSG0000 | mucosal h | Inflamed | CTB-25B1  | processed chr19  | 1457664  | 1462764  | - | 982   | 240.1408 | 0        | 0.401387 | 0.139251 | 2.882474 | 0.00484  | 0.030344 | 1 |
| ENSG0000 | mucosal h | Inflamed | RP11-264E | lincRNA chr11    | 1.28E+08 | 1.28E+08 | - | 1157  | 2.658711 | 0.582339 | -0.6992  | 0.242633 | -2.88171 | 0.00485  | 0.030403 | 1 |
| ENSG0000 | mucosal h | Inflamed | ECH1      | protein_cc chr19 | 39306062 | 39322645 | - | 2467  | 3824.642 | 0        | 0.313056 | 0.108638 | 2.881647 | 0.004851 | 0.030403 | 1 |
| ENSG0000 | mucosal h | Inflamed | CACFD1    | protein_cc chr9  | 1.36E+08 | 1.36E+08 | + | 3518  | 3211.857 | 0        | 0.44153  | 0.153257 | 2.880972 | 0.004861 | 0.030456 | 1 |
| ENSG0000 | mucosal h | Inflamed | CTD-2611  | sense_intr chr19 | 56220529 | 56220899 | + | 371   | 5.374702 | 0.288783 | 0.627572 | 0.217843 | 2.880842 | 0.004863 | 0.03046  | 1 |
| ENSG0000 | mucosal h | Inflamed | FLOT1     | protein_cc chr6  | 30695486 | 30710510 | - | 3186  | 5117.547 | 0        | -0.21887 | 0.075988 | -2.88035 | 0.00487  | 0.030486 | 1 |
| ENSG0000 | mucosal h | Inflamed | FAM177A   | protein_cc chr14 | 35514113 | 35582336 | + | 8383  | 1688.554 | 0        | 0.340647 | 0.118268 | 2.880309 | 0.00487  | 0.030486 | 1 |
| ENSG0000 | mucosal h | Inflamed | UGDH      | protein_cc chr4  | 39500375 | 39529931 | - | 4045  | 3861.878 | 0        | 0.57253  | 0.198774 | 2.880306 | 0.00487  | 0.030486 | 1 |
| ENSG0000 | mucosal h | Inflamed | RP11-383C | sense_intr chr10 | 1.27E+08 | 1.27E+08 | - | 300   | 1.665871 | 0.579952 | 0.438656 | 0.152301 | 2.880183 | 0.004872 | 0.03049  | 1 |
| ENSG0000 | mucosal h | Inflamed | LMO4      | protein_cc chr1  | 87794151 | 87814606 | + | 5833  | 1948.279 | 0        | -0.32173 | 0.111712 | -2.87996 | 0.004875 | 0.030502 | 1 |
| ENSG0000 | mucosal h | Inflamed | RGS4      | protein_cc chr1  | 1.63E+08 | 1.63E+08 | + | 4836  | 76.06921 | 0.019093 | -0.98971 | 0.343762 | -2.87906 | 0.004888 | 0.030569 | 1 |
| ENSG0000 | mucosal h | Inflamed | NBR1      | protein_cc chr17 | 41322498 | 41363708 | + | 8424  | 6115.802 | 0        | 0.442232 | 0.153605 | 2.879011 | 0.004889 | 0.030569 | 1 |
| ENSG0000 | mucosal h | Inflamed | ITGAM     | protein_cc chr16 | 31271311 | 31344213 | + | 5665  | 1034.296 | 0        | -0.746   | 0.259119 | -2.87896 | 0.004889 | 0.030569 | 1 |
| ENSG0000 | mucosal h | Inflamed | TIGIT     | protein_cc chr3  | 1.14E+08 | 1.14E+08 | + | 6091  | 286.3126 | 0        | -0.72552 | 0.252055 | -2.87842 | 0.004897 | 0.030611 | 1 |
| ENSG0000 | mucosal h | Inflamed | SCML2     | protein_cc chrX  | 18257434 | 18372847 | - | 4368  | 46.25298 | 0.016706 | 0.574441 | 0.199583 | 2.878207 | 0.0049   | 0.030623 | 1 |
| ENSG0000 | mucosal h | Inflamed | WBSCR27   | protein_cc chr7  | 73248920 | 73256865 | - | 1469  | 104.2005 | 0        | 0.522423 | 0.181521 | 2.878035 | 0.004903 | 0.030631 | 1 |
| ENSG0000 | mucosal h | Inflamed | MTND1P2   | pseudoger chr1   | 564442   | 564813   | + | 372   | 1429.979 | 0        | 0.514652 | 0.178827 | 2.877925 | 0.004904 | 0.030633 | 1 |
| ENSG0000 | mucosal h | Inflamed | AF011889  | lincRNA chrX     | 1.49E+08 | 1.49E+08 | - | 655   | 18.00239 | 0.095465 | 0.782564 | 0.271958 | 2.877518 | 0.00491  | 0.030662 | 1 |
| ENSG0000 | mucosal h | Inflamed | TST       | protein_cc chr22 | 37406900 | 37415681 | - | 1915  | 7512.582 | 0        | 0.542392 | 0.188503 | 2.877367 | 0.004912 | 0.030669 | 1 |
| ENSG0000 | mucosal h | Inflamed | EPHX3     | protein_cc chr19 | 15337730 | 15344246 | - | 2034  | 44.76134 | 0        | -0.78229 | 0.27189  | -2.87724 | 0.004914 | 0.030673 | 1 |
| ENSG0000 | mucosal h | Inflamed | NXT1      | protein_cc chr20 | 23331373 | 23335414 | + | 1123  | 340.5251 | 0        | -0.32033 | 0.111402 | -2.8754  | 0.004941 | 0.030827 | 1 |
| ENSG0000 | mucosal h | Inflamed | ABHD17C   | protein_cc chr15 | 80972025 | 81047962 | + | 3627  | 5575.017 | 0        | 0.489366 | 0.170197 | 2.875286 | 0.004942 | 0.030827 | 1 |
| ENSG0000 | mucosal h | Inflamed | C6orf222  | protein_cc chr6  | 36283534 | 36304662 | - | 3736  | 807.4702 | 0        | 0.831351 | 0.289138 | 2.875274 | 0.004942 | 0.030827 | 1 |
| ENSG0000 | mucosal h | Inflamed | DERA      | protein_cc chr12 | 16064106 | 16190220 | + | 2848  | 1098.217 | 0        | 0.362708 | 0.126165 | 2.874865 | 0.004948 | 0.030855 | 1 |
| ENSG0000 | mucosal h | Inflamed | ASGR1     | protein_cc chr17 | 7076750  | 7082883  | - | 3748  | 31.24344 | 0.002387 | -0.50292 | 0.174942 | -2.8748  | 0.004949 | 0.030855 | 1 |
| ENSG0000 | mucosal h | Inflamed | TPRN      | protein_cc chr9  | 1.4E+08  | 1.4E+08  | - | 5338  | 4647.387 | 0        | 0.554134 | 0.192798 | 2.874167 | 0.004958 | 0.030905 | 1 |
| ENSG0000 | mucosal h | Inflamed | UGT1A4    | protein_cc chr2  | 2.35E+08 | 2.35E+08 | + | 2522  | 2.400955 | 0.682578 | 0.528798 | 0.183993 | 2.874009 | 0.004961 | 0.030912 | 1 |
| ENSG0000 | mucosal h | Inflamed | DPEP1     | protein_cc chr16 | 89679716 | 89704839 | + | 2712  | 717.9499 | 0        | -0.96234 | 0.334862 | -2.87383 | 0.004963 | 0.03092  | 1 |

|          |           |          |           |                  |          |          |   |       |          |          |          |          |          |          |          |   |
|----------|-----------|----------|-----------|------------------|----------|----------|---|-------|----------|----------|----------|----------|----------|----------|----------|---|
| ENSG0000 | mucosal h | Inflamed | AL357673. | protein_cc chr1  | 54635333 | 54637997 | - | 2665  | 177.389  | 0        | 0.538273 | 0.187317 | 2.87359  | 0.004967 | 0.030931 | 1 |
| ENSG0000 | mucosal h | Inflamed | SKAP1     | protein_cc chr17 | 46210802 | 46507637 | - | 2648  | 237.0239 | 0        | -0.44621 | 0.155281 | -2.87356 | 0.004967 | 0.030931 | 1 |
| ENSG0000 | mucosal h | Inflamed | AC078883  | antisense chr2   | 1.73E+08 | 1.73E+08 | - | 1077  | 22.43198 | 0.011933 | -0.56451 | 0.196459 | -2.87345 | 0.004969 | 0.030933 | 1 |
| ENSG0000 | mucosal h | Inflamed | LRR37A2   | protein_cc chr17 | 44588877 | 44633016 | + | 6756  | 169.3795 | 0        | 0.630167 | 0.219318 | 2.873305 | 0.004971 | 0.030939 | 1 |
| ENSG0000 | mucosal h | Inflamed | AC096772  | lincRNA chr2     | 2.09E+08 | 2.09E+08 | - | 1262  | 86.04535 | 0.009547 | 0.478085 | 0.166433 | 2.872538 | 0.004982 | 0.031001 | 1 |
| ENSG0000 | mucosal h | Inflamed | PF4V1     | protein_cc chr4  | 74718906 | 74719872 | + | 522   | 13.55609 | 0.252983 | -0.92628 | 0.322499 | -2.87218 | 0.004987 | 0.031026 | 1 |
| ENSG0000 | mucosal h | Inflamed | PODNL1    | protein_cc chr19 | 14042000 | 14064204 | - | 4168  | 190.3508 | 0        | -0.60593 | 0.210989 | -2.87183 | 0.004992 | 0.03105  | 1 |
| ENSG0000 | mucosal h | Inflamed | RBMXL2    | protein_cc chr11 | 7110165  | 7112379  | + | 2215  | 2.346062 | 0.498807 | -0.52142 | 0.18159  | -2.87142 | 0.004998 | 0.03108  | 1 |
| ENSG0000 | mucosal h | Inflamed | ABO       | processed_chr9   | 1.36E+08 | 1.36E+08 | - | 6341  | 1057.303 | 0.002387 | 0.951214 | 0.331294 | 2.871205 | 0.005001 | 0.031092 | 1 |
| ENSG0000 | mucosal h | Inflamed | RP4-714D5 | sense_ove chr1   | 1E+08    | 1.01E+08 | + | 5067  | 309.3675 | 0.004773 | 1.13048  | 0.39379  | 2.870768 | 0.005008 | 0.031125 | 1 |
| ENSG0000 | mucosal h | Inflamed | RP11-79N1 | lincRNA chr6     | 53605547 | 53611820 | - | 850   | 7.109785 | 0.176611 | 0.683744 | 0.238227 | 2.870137 | 0.005017 | 0.031168 | 1 |
| ENSG0000 | mucosal h | Inflamed | PSMD10P2  | pseudoger chr3   | 1.86E+08 | 1.86E+08 | + | 672   | 19.35084 | 0.054893 | 0.791803 | 0.275877 | 2.870132 | 0.005017 | 0.031168 | 1 |
| ENSG0000 | mucosal h | Inflamed | CERS4     | protein_cc chr19 | 8271620  | 8327305  | + | 4059  | 351.4654 | 0        | -0.52641 | 0.183429 | -2.8698  | 0.005022 | 0.03119  | 1 |
| ENSG0000 | mucosal h | Inflamed | AC006116  | antisense chr19  | 56826072 | 56852656 | + | 2537  | 4        | 0.202864 | 0.470216 | 0.16387  | 2.869438 | 0.005027 | 0.031216 | 1 |
| ENSG0000 | mucosal h | Inflamed | DKFZP761  | protein_cc chr19 | 11466062 | 11476374 | + | 3273  | 693.0692 | 0        | -0.54922 | 0.191419 | -2.86921 | 0.005031 | 0.03123  | 1 |
| ENSG0000 | mucosal h | Inflamed | RP11-184M | lincRNA chr4     | 1.29E+08 | 1.29E+08 | - | 1623  | 3.596659 | 0.560859 | -0.69699 | 0.24293  | -2.86912 | 0.005032 | 0.03123  | 1 |
| ENSG0000 | mucosal h | Inflamed | ADCY5     | protein_cc chr3  | 1.23E+08 | 1.23E+08 | - | 8873  | 729.031  | 0        | 0.671137 | 0.233925 | 2.869021 | 0.005033 | 0.031232 | 1 |
| ENSG0000 | mucosal h | Inflamed | ACCS      | protein_cc chr11 | 44087475 | 44105772 | + | 5826  | 565.8759 | 0        | 0.560007 | 0.19521  | 2.868742 | 0.005038 | 0.031245 | 1 |
| ENSG0000 | mucosal h | Inflamed | RP11-119I | lincRNA chr11    | 67653948 | 67673821 | + | 3962  | 36.84964 | 0.009547 | 0.751974 | 0.26213  | 2.868711 | 0.005038 | 0.031245 | 1 |
| ENSG0000 | mucosal h | Inflamed | PQLC1     | protein_cc chr18 | 77662420 | 77711664 | - | 5225  | 2521.914 | 0        | 0.298251 | 0.10397  | 2.86862  | 0.005039 | 0.031246 | 1 |
| ENSG0000 | mucosal h | Inflamed | FAM229A   | protein_cc chr1  | 32826871 | 32829879 | - | 2845  | 307.4511 | 0        | 0.597273 | 0.208285 | 2.867579 | 0.005055 | 0.031334 | 1 |
| ENSG0000 | mucosal h | Inflamed | ZZEF1     | protein_cc chr17 | 3907739  | 4046314  | - | 15878 | 10446.92 | 0        | 0.426747 | 0.148847 | 2.867012 | 0.005063 | 0.031378 | 1 |
| ENSG0000 | mucosal h | Inflamed | CHN1      | protein_cc chr2  | 1.76E+08 | 1.76E+08 | - | 4971  | 262.4654 | 0.00716  | -0.8405  | 0.293216 | -2.86649 | 0.005071 | 0.031418 | 1 |
| ENSG0000 | mucosal h | Inflamed | KCNH6     | protein_cc chr17 | 61600695 | 61626338 | + | 4211  | 42.87112 | 0.019093 | 0.810892 | 0.282911 | 2.866246 | 0.005074 | 0.031434 | 1 |
| ENSG0000 | mucosal h | Inflamed | IGSF8     | protein_cc chr1  | 1.6E+08  | 1.6E+08  | - | 2562  | 2611.909 | 0        | 0.351743 | 0.122724 | 2.866125 | 0.005076 | 0.031437 | 1 |
| ENSG0000 | mucosal h | Inflamed | LINC0046C | lincRNA chr13    | 1.07E+08 | 1.07E+08 | + | 1152  | 3.28401  | 0.477327 | -0.65926 | 0.230041 | -2.86583 | 0.00508  | 0.031456 | 1 |
| ENSG0000 | mucosal h | Inflamed | SUN1      | protein_cc chr7  | 855528   | 936072   | + | 11908 | 5018.215 | 0        | 0.448068 | 0.156389 | 2.865085 | 0.005092 | 0.031517 | 1 |
| ENSG0000 | mucosal h | Inflamed | UNC5A     | protein_cc chr5  | 1.76E+08 | 1.76E+08 | + | 4357  | 14.66826 | 0.121718 | -0.88589 | 0.309209 | -2.86501 | 0.005093 | 0.031517 | 1 |
| ENSG0000 | mucosal h | Inflamed | ST6GAL1   | protein_cc chr3  | 1.87E+08 | 1.87E+08 | + | 9151  | 7101.589 | 0        | -0.54173 | 0.18913  | -2.86431 | 0.005103 | 0.031574 | 1 |
| ENSG0000 | mucosal h | Inflamed | FGD3      | protein_cc chr9  | 95709733 | 95798518 | + | 6055  | 1168.962 | 0        | -0.60849 | 0.212471 | -2.86388 | 0.005109 | 0.031606 | 1 |
| ENSG0000 | mucosal h | Inflamed | RP11-57H1 | sense_ove chr10  | 1.15E+08 | 1.15E+08 | + | 4237  | 310.1838 | 0.004773 | 0.678236 | 0.236852 | 2.863542 | 0.005114 | 0.03163  | 1 |
| ENSG0000 | mucosal h | Inflamed | CTD-3018C | processed_chr19  | 52892095 | 52901019 | - | 4160  | 43.98329 | 0.011933 | 0.643508 | 0.224742 | 2.863319 | 0.005118 | 0.031643 | 1 |
| ENSG0000 | mucosal h | Inflamed | SOCS5P4   | pseudoger chrX   | 70263064 | 70265320 | - | 1566  | 17.56802 | 0.076372 | 0.730672 | 0.255202 | 2.863117 | 0.005121 | 0.031654 | 1 |
| ENSG0000 | mucosal h | Inflamed | FBN1      | protein_cc chr15 | 48700503 | 48938046 | - | 16057 | 4076.678 | 0        | -0.71908 | 0.251196 | -2.86263 | 0.005128 | 0.031692 | 1 |
| ENSG0000 | mucosal h | Inflamed | BCAR3     | protein_cc chr1  | 94027347 | 94312706 | - | 5072  | 1238.885 | 0        | 0.287253 | 0.100356 | 2.862347 | 0.005132 | 0.031706 | 1 |
| ENSG0000 | mucosal h | Inflamed | FAM221A   | protein_cc chr7  | 23719749 | 23742868 | + | 7458  | 288.4177 | 0        | 0.661065 | 0.230954 | 2.862317 | 0.005133 | 0.031706 | 1 |
| ENSG0000 | mucosal h | Inflamed | HTR3E     | protein_cc chr3  | 1.84E+08 | 1.84E+08 | + | 2523  | 37.87589 | 0.114558 | 1.010266 | 0.352988 | 2.86204  | 0.005137 | 0.03172  | 1 |
| ENSG0000 | mucosal h | Inflamed | STX5      | protein_cc chr11 | 62574369 | 62599560 | - | 2257  | 1647.635 | 0        | -0.17133 | 0.059865 | -2.862   | 0.005138 | 0.03172  | 1 |
| ENSG0000 | mucosal h | Inflamed | USP32P3   | pseudoger chr17  | 20318860 | 20334321 | + | 1943  | 32.36993 | 0.073986 | 0.94366  | 0.329763 | 2.861632 | 0.005143 | 0.031746 | 1 |
| ENSG0000 | mucosal h | Inflamed | GSN-AS1   | antisense chr9   | 1.24E+08 | 1.24E+08 | - | 4763  | 2.961814 | 0.470167 | 0.59442  | 0.20773  | 2.8615   | 0.005145 | 0.031751 | 1 |

|          |           |          |           |            |       |          |          |   |       |          |          |          |          |          |          |          |   |
|----------|-----------|----------|-----------|------------|-------|----------|----------|---|-------|----------|----------|----------|----------|----------|----------|----------|---|
| ENSG0000 | mucosal h | Inflamed | RP11-339E | sense_intr | chr9  | 1.31E+08 | 1.31E+08 | + | 409   | 6.472554 | 0.112172 | -0.54776 | 0.191428 | -2.86142 | 0.005146 | 0.031751 | 1 |
| ENSG0000 | mucosal h | Inflamed | RP11-527M | lincRNA    | chr8  | 37262957 | 37264242 | - | 578   | 1.75179  | 0.570406 | 0.458189 | 0.160147 | 2.861057 | 0.005152 | 0.031777 | 1 |
| ENSG0000 | mucosal h | Inflamed | SEL1L3    | protein_cc | chr4  | 25749055 | 25865382 | - | 7483  | 10927.8  | 0        | -0.35302 | 0.123396 | -2.86091 | 0.005154 | 0.031784 | 1 |
| ENSG0000 | mucosal h | Inflamed | C22orf43  | protein_cc | chr22 | 23950639 | 23974508 | - | 1300  | 15.01671 | 0.085919 | 0.652716 | 0.22817  | 2.860663 | 0.005157 | 0.031799 | 1 |
| ENSG0000 | mucosal h | Inflamed | GUCY1A3   | protein_cc | chr4  | 1.57E+08 | 1.57E+08 | + | 5766  | 440.6492 | 0        | -0.91923 | 0.32137  | -2.86035 | 0.005162 | 0.03182  | 1 |
| ENSG0000 | mucosal h | Inflamed | MKMK2     | protein_cc | chr19 | 2037470  | 2051243  | - | 5275  | 11154.01 | 0        | 0.314384 | 0.109918 | 2.860163 | 0.005165 | 0.03183  | 1 |
| ENSG0000 | mucosal h | Inflamed | AP000351  | pseudoger  | chr22 | 24373117 | 24374043 | + | 563   | 37.15036 | 0.27685  | 0.580211 | 0.202866 | 2.860074 | 0.005166 | 0.031831 | 1 |
| ENSG0000 | mucosal h | Inflamed | FGF12     | protein_cc | chr3  | 1.92E+08 | 1.92E+08 | - | 7355  | 13.49642 | 0.042959 | -0.65752 | 0.229923 | -2.85973 | 0.005172 | 0.031855 | 1 |
| ENSG0000 | mucosal h | Inflamed | ABHD8     | protein_cc | chr19 | 17402940 | 17421045 | - | 2210  | 362.2196 | 0        | -0.43282 | 0.151355 | -2.85962 | 0.005173 | 0.031858 | 1 |
| ENSG0000 | mucosal h | Inflamed | BZW2      | protein_cc | chr7  | 16685756 | 16746148 | + | 3662  | 1517.983 | 0        | 0.36224  | 0.126683 | 2.859423 | 0.005176 | 0.031869 | 1 |
| ENSG0000 | mucosal h | Inflamed | TOB1      | protein_cc | chr17 | 48939584 | 48945339 | - | 2521  | 2746.671 | 0        | 0.41536  | 0.145287 | 2.858888 | 0.005184 | 0.031911 | 1 |
| ENSG0000 | mucosal h | Inflamed | MEGF11    | protein_cc | chr15 | 66187417 | 66546085 | - | 9365  | 10.24582 | 0.210024 | -0.88181 | 0.308469 | -2.85866 | 0.005188 | 0.031925 | 1 |
| ENSG0000 | mucosal h | Inflamed | PTCH1     | protein_cc | chr9  | 98205262 | 98279339 | - | 16591 | 2973.931 | 0        | 0.714494 | 0.25     | 2.857979 | 0.005198 | 0.03198  | 1 |
| ENSG0000 | mucosal h | Inflamed | NANOG     | protein_cc | chr12 | 7940390  | 7948655  | + | 2311  | 1.119332 | 0.708831 | 0.319388 | 0.111756 | 2.857896 | 0.005199 | 0.03198  | 1 |
| ENSG0000 | mucosal h | Inflamed | MMRN2     | protein_cc | chr10 | 88695297 | 88729238 | - | 5334  | 1468.589 | 0        | -0.69917 | 0.24465  | -2.85782 | 0.0052   | 0.03198  | 1 |
| ENSG0000 | mucosal h | Inflamed | SYDE1     | protein_cc | chr19 | 15218214 | 15225799 | + | 3965  | 763.3437 | 0        | -0.6405  | 0.224161 | -2.85731 | 0.005208 | 0.032013 | 1 |
| ENSG0000 | mucosal h | Inflamed | SRCRB4D   | protein_cc | chr7  | 76018651 | 76039012 | - | 2819  | 16.179   | 0.002387 | -0.38743 | 0.135591 | -2.85731 | 0.005208 | 0.032013 | 1 |
| ENSG0000 | mucosal h | Inflamed | RP3-412A5 | antisense  | chr22 | 31478142 | 31479551 | - | 1410  | 14.88067 | 0.019093 | -0.41218 | 0.14428  | -2.8568  | 0.005216 | 0.032053 | 1 |
| ENSG0000 | mucosal h | Inflamed | SPCS2     | protein_cc | chr11 | 74660292 | 74690076 | + | 2979  | 2037.351 | 0        | -0.35504 | 0.124284 | -2.85672 | 0.005217 | 0.032053 | 1 |
| ENSG0000 | mucosal h | Inflamed | ARPC5L    | protein_cc | chr9  | 1.28E+08 | 1.28E+08 | + | 3601  | 1714.48  | 0        | -0.24139 | 0.08451  | -2.8564  | 0.005222 | 0.032075 | 1 |
| ENSG0000 | mucosal h | Inflamed | RP5-837J1 | sense_ove  | chr17 | 33332107 | 33336762 | + | 4656  | 364.506  | 0        | 0.459118 | 0.160802 | 2.855172 | 0.00524  | 0.032182 | 1 |
| ENSG0000 | mucosal h | Inflamed | Z85986.1  | miRNA      | chr6  | 36478294 | 36478375 | - | 82    | 1.162291 | 0.694511 | 0.368299 | 0.129008 | 2.854844 | 0.005245 | 0.032199 | 1 |
| ENSG0000 | mucosal h | Inflamed | GDF11     | protein_cc | chr12 | 56137064 | 56150911 | + | 3846  | 323.6659 | 0        | -0.45678 | 0.160002 | -2.85482 | 0.005246 | 0.032199 | 1 |
| ENSG0000 | mucosal h | Inflamed | RP11-55K1 | antisense  | chr16 | 81344336 | 81347028 | - | 2693  | 17.75418 | 0.054893 | 0.748529 | 0.262205 | 2.854751 | 0.005247 | 0.032199 | 1 |
| ENSG0000 | mucosal h | Inflamed | E2F5      | protein_cc | chr8  | 86089460 | 86129387 | + | 5922  | 349.6826 | 0        | -0.44587 | 0.156191 | -2.85467 | 0.005248 | 0.032199 | 1 |
| ENSG0000 | mucosal h | Inflamed | RP11-207C | antisense  | chr9  | 5719021  | 5720244  | - | 543   | 1.252983 | 0.677804 | 0.340427 | 0.119278 | 2.854064 | 0.005257 | 0.032248 | 1 |
| ENSG0000 | mucosal h | Inflamed | FSTL1     | protein_cc | chr3  | 1.2E+08  | 1.2E+08  | - | 8727  | 5910.222 | 0        | -0.75094 | 0.263119 | -2.85398 | 0.005259 | 0.032249 | 1 |
| ENSG0000 | mucosal h | Inflamed | NUDT6     | protein_cc | chr4  | 1.24E+08 | 1.24E+08 | - | 6591  | 146.9427 | 0        | 0.388945 | 0.136296 | 2.853675 | 0.005263 | 0.03227  | 1 |
| ENSG0000 | mucosal h | Inflamed | MIR3936   | miRNA      | chr5  | 1.32E+08 | 1.32E+08 | - | 110   | 8.980907 | 0.145585 | 0.634136 | 0.222227 | 2.85355  | 0.005265 | 0.032274 | 1 |
| ENSG0000 | mucosal h | Inflamed | RP11-483F | antisense  | chr16 | 83823572 | 83841439 | - | 1603  | 12.11695 | 0.019093 | -0.53196 | 0.18644  | -2.85324 | 0.00527  | 0.032296 | 1 |
| ENSG0000 | mucosal h | Inflamed | SPRR1B    | protein_cc | chr1  | 1.53E+08 | 1.53E+08 | + | 620   | 61.05967 | 0.52506  | -1.70106 | 0.596332 | -2.85254 | 0.005281 | 0.032354 | 1 |
| ENSG0000 | mucosal h | Inflamed | ACVR1C    | protein_cc | chr2  | 1.58E+08 | 1.58E+08 | - | 9195  | 201.1527 | 0.00716  | 0.890523 | 0.312251 | 2.851944 | 0.00529  | 0.032402 | 1 |
| ENSG0000 | mucosal h | Inflamed | BSDC1     | protein_cc | chr1  | 32830704 | 32860332 | - | 6275  | 3924.437 | 0        | 0.2072   | 0.072655 | 2.851835 | 0.005291 | 0.032402 | 1 |
| ENSG0000 | mucosal h | Inflamed | CTD-2049C | antisense  | chr16 | 27690261 | 27730104 | - | 1200  | 1.210024 | 0.701671 | 0.458306 | 0.160708 | 2.851787 | 0.005292 | 0.032402 | 1 |
| ENSG0000 | mucosal h | Inflamed | ZNF587    | protein_cc | chr19 | 58361225 | 58376480 | + | 7350  | 2548.952 | 0        | 0.654807 | 0.229646 | 2.85138  | 0.005299 | 0.032433 | 1 |
| ENSG0000 | mucosal h | Inflamed | RGS20     | protein_cc | chr8  | 54764368 | 54871863 | + | 3192  | 1.412888 | 0.711217 | -0.50264 | 0.176296 | -2.85109 | 0.005303 | 0.032452 | 1 |
| ENSG0000 | mucosal h | Inflamed | SLC16A5   | protein_cc | chr17 | 73083822 | 73102257 | + | 3089  | 1325.136 | 0        | 0.357209 | 0.125322 | 2.850331 | 0.005315 | 0.032516 | 1 |
| ENSG0000 | mucosal h | Inflamed | MIR194-2  | lincRNA    | chr11 | 64658827 | 64660921 | - | 1852  | 337.1313 | 0.002387 | 0.813234 | 0.285347 | 2.849982 | 0.00532  | 0.032542 | 1 |
| ENSG0000 | mucosal h | Inflamed | WNT5A     | protein_cc | chr3  | 55499743 | 55523973 | - | 6660  | 1618.136 | 0        | -0.95002 | 0.33336  | -2.84983 | 0.005322 | 0.032543 | 1 |
| ENSG0000 | mucosal h | Inflamed | MEF2C     | protein_cc | chr5  | 88013975 | 88199922 | - | 9053  | 854.7733 | 0        | -0.72556 | 0.254605 | -2.84974 | 0.005324 | 0.032543 | 1 |

|          |           |          |           |            |       |          |          |   |      |          |          |          |          |          |          |          |   |
|----------|-----------|----------|-----------|------------|-------|----------|----------|---|------|----------|----------|----------|----------|----------|----------|----------|---|
| ENSG0000 | mucosal h | Inflamed | KIRREL2   | protein_cc | chr19 | 36346763 | 36358011 | + | 3382 | 18.90692 | 0.081146 | -0.75426 | 0.264678 | -2.84973 | 0.005324 | 0.032543 | 1 |
| ENSG0000 | mucosal h | Inflamed | AC026310  | protein_cc | chr12 | 25055243 | 25057615 | + | 2373 | 1.644391 | 0.658711 | -0.52514 | 0.184294 | -2.84945 | 0.005328 | 0.032561 | 1 |
| ENSG0000 | mucosal h | Inflamed | APPL2     | protein_cc | chr12 | 1.06E+08 | 1.06E+08 | - | 5124 | 3958.251 | 0        | 0.573344 | 0.201233 | 2.84915  | 0.005333 | 0.032582 | 1 |
| ENSG0000 | mucosal h | Inflamed | PDGFB     | protein_cc | chr22 | 39619364 | 39640756 | - | 3761 | 704.1957 | 0        | -0.66889 | 0.234804 | -2.84871 | 0.00534  | 0.032616 | 1 |
| ENSG0000 | mucosal h | Inflamed | RP11-73M  | lincRNA    | chr14 | 1.04E+08 | 1.04E+08 | + | 683  | 47.33413 | 0.002387 | 0.434048 | 0.152402 | 2.848054 | 0.00535  | 0.032671 | 1 |
| ENSG0000 | mucosal h | Inflamed | CHRNA6    | protein_cc | chr8  | 42607763 | 42651535 | - | 2596 | 5.520286 | 0.346062 | -0.67062 | 0.235505 | -2.84757 | 0.005357 | 0.032709 | 1 |
| ENSG0000 | mucosal h | Inflamed | ADAMTS1   | protein_cc | chr9  | 1.36E+08 | 1.36E+08 | + | 5695 | 201.8305 | 0.009547 | 0.638161 | 0.224119 | 2.847428 | 0.00536  | 0.032715 | 1 |
| ENSG0000 | mucosal h | Inflamed | GUCA1A    | protein_cc | chr6  | 42123144 | 42147794 | + | 2317 | 1.138425 | 0.75179  | -0.45199 | 0.158751 | -2.84719 | 0.005363 | 0.03273  | 1 |
| ENSG0000 | mucosal h | Inflamed | RP11-134M | lincRNA    | chr12 | 14369524 | 14374231 | + | 640  | 2.651551 | 0.443914 | -0.5482  | 0.192552 | -2.847   | 0.005366 | 0.03274  | 1 |
| ENSG0000 | mucosal h | Inflamed | ZDHHC13   | protein_cc | chr11 | 19138646 | 19197969 | + | 7763 | 855.031  | 0        | 0.481689 | 0.1692   | 2.846856 | 0.005369 | 0.032747 | 1 |
| ENSG0000 | mucosal h | Inflamed | ITPKB-IT1 | sense_intr | chr1  | 2.27E+08 | 2.27E+08 | - | 870  | 2.136038 | 0.584726 | -0.53448 | 0.187769 | -2.84649 | 0.005374 | 0.032774 | 1 |
| ENSG0000 | mucosal h | Inflamed | RP11-395C | lincRNA    | chr8  | 1.07E+08 | 1.07E+08 | + | 1419 | 34.73747 | 0.004773 | 0.485971 | 0.170785 | 2.845505 | 0.00539  | 0.03286  | 1 |
| ENSG0000 | mucosal h | Inflamed | RP11-340I | lincRNA    | chr7  | 63361201 | 63378372 | + | 637  | 1.885442 | 0.529833 | 0.361012 | 0.126889 | 2.845093 | 0.005396 | 0.03289  | 1 |
| ENSG0000 | mucosal h | Inflamed | ADHFE1    | protein_cc | chr8  | 67342420 | 67383836 | + | 3753 | 117.2697 | 0.002387 | 0.614129 | 0.215861 | 2.845024 | 0.005397 | 0.03289  | 1 |
| ENSG0000 | mucosal h | Inflamed | RBM47     | protein_cc | chr4  | 40425272 | 40632892 | - | 8558 | 10038.35 | 0        | 0.51994  | 0.182764 | 2.844864 | 0.0054   | 0.032898 | 1 |
| ENSG0000 | mucosal h | Inflamed | C2CD4C    | protein_cc | chr19 | 405438   | 409139   | - | 3098 | 41.73508 | 0.016706 | -0.62379 | 0.219297 | -2.84451 | 0.005405 | 0.03292  | 1 |
| ENSG0000 | mucosal h | Inflamed | GRM2      | protein_cc | chr3  | 51741086 | 51752629 | + | 7096 | 15.98807 | 0.100239 | -0.8051  | 0.283041 | -2.84448 | 0.005406 | 0.03292  | 1 |
| ENSG0000 | mucosal h | Inflamed | GPX1      | protein_cc | chr3  | 49394609 | 49396033 | - | 1425 | 4064.988 | 0        | -0.42906 | 0.150855 | -2.84419 | 0.00541  | 0.03294  | 1 |
| ENSG0000 | mucosal h | Inflamed | YBX2      | protein_cc | chr17 | 7191571  | 7197934  | - | 4618 | 1243.516 | 0.00716  | 1.069185 | 0.375941 | 2.844023 | 0.005413 | 0.032941 | 1 |
| ENSG0000 | mucosal h | Inflamed | RP11-750I | antisense  | chr11 | 47404699 | 47430741 | - | 1113 | 90.19093 | 0.00716  | -0.73935 | 0.259969 | -2.84398 | 0.005413 | 0.032941 | 1 |
| ENSG0000 | mucosal h | Inflamed | AMPD1     | protein_cc | chr1  | 1.15E+08 | 1.15E+08 | - | 2496 | 189.7804 | 0        | -0.76784 | 0.269993 | -2.84393 | 0.005414 | 0.032941 | 1 |
| ENSG0000 | mucosal h | Inflamed | RP1-229K2 | pseudoger  | chr6  | 41237613 | 41237977 | - | 365  | 4.756563 | 0.596659 | -0.87152 | 0.306554 | -2.84297 | 0.005429 | 0.033026 | 1 |
| ENSG0000 | mucosal h | Inflamed | LACE1     | protein_cc | chr6  | 1.09E+08 | 1.09E+08 | + | 8450 | 125.8305 | 0        | 0.494434 | 0.17393  | 2.842719 | 0.005433 | 0.033042 | 1 |
| ENSG0000 | mucosal h | Inflamed | KLF2      | protein_cc | chr19 | 16435628 | 16438685 | + | 2018 | 1714.79  | 0        | -0.60797 | 0.213927 | -2.84198 | 0.005445 | 0.033105 | 1 |
| ENSG0000 | mucosal h | Inflamed | GPNMB     | protein_cc | chr7  | 23275586 | 23314727 | + | 5956 | 3743.723 | 0        | -0.52884 | 0.186163 | -2.84074 | 0.005464 | 0.033209 | 1 |
| ENSG0000 | mucosal h | Inflamed | TEAD2     | protein_cc | chr19 | 49843852 | 49865714 | - | 2980 | 756.7757 | 0        | -0.45855 | 0.16142  | -2.84074 | 0.005464 | 0.033209 | 1 |
| ENSG0000 | mucosal h | Inflamed | ADRM1     | protein_cc | chr20 | 60877149 | 60883918 | + | 2142 | 3305.9   | 0        | -0.2443  | 0.086006 | -2.8405  | 0.005468 | 0.033225 | 1 |
| ENSG0000 | mucosal h | Inflamed | RP11-96C2 | sense_intr | chr10 | 88873711 | 88875280 | + | 688  | 0.918854 | 0.770883 | 0.38088  | 0.134115 | 2.839951 | 0.005477 | 0.033267 | 1 |
| ENSG0000 | mucosal h | Inflamed | GPR85     | protein_cc | chr7  | 1.13E+08 | 1.13E+08 | - | 7396 | 26.34129 | 0.011933 | -0.68742 | 0.242064 | -2.83984 | 0.005479 | 0.033267 | 1 |
| ENSG0000 | mucosal h | Inflamed | AC073869  | pseudoger  | chr2  | 1.32E+08 | 1.32E+08 | - | 1026 | 2.639618 | 0.453461 | 0.489175 | 0.172256 | 2.839812 | 0.005479 | 0.033267 | 1 |
| ENSG0000 | mucosal h | Inflamed | VEGFC     | protein_cc | chr4  | 1.78E+08 | 1.78E+08 | - | 2423 | 153.4153 | 0.004773 | -0.71904 | 0.253213 | -2.83967 | 0.005482 | 0.033274 | 1 |
| ENSG0000 | mucosal h | Inflamed | HNRNPH1   | pseudoger  | chr6  | 1.6E+08  | 1.6E+08  | - | 1185 | 6.353222 | 0.198091 | 0.612064 | 0.215563 | 2.839371 | 0.005486 | 0.033295 | 1 |
| ENSG0000 | mucosal h | Inflamed | RP11-539I | antisense  | chr10 | 1.19E+08 | 1.19E+08 | - | 772  | 28.45107 | 0.004773 | 0.520364 | 0.183317 | 2.838604 | 0.005498 | 0.033361 | 1 |
| ENSG0000 | mucosal h | Inflamed | RP11-370A | antisense  | chr18 | 20303454 | 20487684 | - | 1229 | 2.190931 | 0.48926  | -0.44838 | 0.157971 | -2.83836 | 0.005502 | 0.033368 | 1 |
| ENSG0000 | mucosal h | Inflamed | AK2       | protein_cc | chr1  | 33473585 | 33546597 | - | 5683 | 4018.243 | 0        | 0.28411  | 0.100098 | 2.838316 | 0.005503 | 0.033368 | 1 |
| ENSG0000 | mucosal h | Inflamed | GAL3ST2   | protein_cc | chr2  | 2.43E+08 | 2.43E+08 | + | 1370 | 905.389  | 0.01432  | 1.089778 | 0.383956 | 2.838292 | 0.005503 | 0.033368 | 1 |
| ENSG0000 | mucosal h | Inflamed | RP11-206L | processed  | chr1  | 745489   | 753092   | - | 402  | 2.436754 | 0.415274 | 0.439445 | 0.154846 | 2.837954 | 0.005509 | 0.033393 | 1 |
| ENSG0000 | mucosal h | Inflamed | COL6A5    | protein_cc | chr3  | 1.3E+08  | 1.3E+08  | + | 9591 | 100.8115 | 0.031026 | -1.05324 | 0.371167 | -2.83765 | 0.005514 | 0.033414 | 1 |
| ENSG0000 | mucosal h | Inflamed | PLA2G4E   | protein_cc | chr15 | 42273780 | 42343388 | - | 5992 | 46.57041 | 0.026253 | -1.18099 | 0.416221 | -2.83742 | 0.005517 | 0.033422 | 1 |
| ENSG0000 | mucosal h | Inflamed | PUSL1     | protein_cc | chr1  | 1243947  | 1247057  | + | 2489 | 521.2721 | 0        | -0.28055 | 0.098877 | -2.83736 | 0.005518 | 0.033422 | 1 |



|          |           |          |                      |       |          |          |   |       |          |          |          |          |          |          |          |   |
|----------|-----------|----------|----------------------|-------|----------|----------|---|-------|----------|----------|----------|----------|----------|----------|----------|---|
| ENSG0000 | mucosal h | Inflamed | RP11-1379 antisense  | chr5  | 1.79E+08 | 1.79E+08 | - | 1966  | 14.95465 | 0.090692 | 0.687536 | 0.242317 | 2.837337 | 0.005519 | 0.033422 | 1 |
| ENSG0000 | mucosal h | Inflamed | PPT2-EGFL protein_cc | chr6  | 32121622 | 32139755 | + | 5512  | 6.988067 | 0.143198 | 0.623629 | 0.219806 | 2.837172 | 0.005521 | 0.033424 | 1 |
| ENSG0000 | mucosal h | Inflamed | LINC0091C lincRNA    | chr17 | 41447213 | 41466567 | - | 6895  | 74.72315 | 0        | 0.359434 | 0.126691 | 2.837095 | 0.005522 | 0.033424 | 1 |
| ENSG0000 | mucosal h | Inflamed | CTD-2331 pseudoger   | chr19 | 53365060 | 53366119 | - | 1060  | 46.27924 | 0.023866 | 0.712156 | 0.251018 | 2.837077 | 0.005523 | 0.033424 | 1 |
| ENSG0000 | mucosal h | Inflamed | FAM218A protein_cc   | chr4  | 1.66E+08 | 1.66E+08 | + | 2174  | 9.610979 | 0.085919 | 0.560434 | 0.197555 | 2.836856 | 0.005526 | 0.033437 | 1 |
| ENSG0000 | mucosal h | Inflamed | AC109333 antisense   | chr17 | 4922509  | 4923388  | - | 583   | 12.53461 | 0.071599 | -0.61042 | 0.215197 | -2.83657 | 0.005531 | 0.033457 | 1 |
| ENSG0000 | mucosal h | Inflamed | RP11-610F lincRNA    | chr4  | 1.52E+08 | 1.52E+08 | - | 358   | 13.20286 | 0.083532 | 0.650721 | 0.229414 | 2.836454 | 0.005533 | 0.033458 | 1 |
| ENSG0000 | mucosal h | Inflamed | RP11-347C sense_intr | chr8  | 95962265 | 95963624 | + | 709   | 17.49881 | 0.033413 | -0.70682 | 0.249197 | -2.8364  | 0.005534 | 0.033458 | 1 |
| ENSG0000 | mucosal h | Inflamed | PIF1 protein_cc      | chr15 | 65107831 | 65117867 | - | 4656  | 323.5561 | 0        | -0.56497 | 0.199212 | -2.83601 | 0.00554  | 0.033482 | 1 |
| ENSG0000 | mucosal h | Inflamed | NR2F6 protein_cc     | chr19 | 17342692 | 17356749 | - | 2676  | 4560.768 | 0        | 0.38527  | 0.13585  | 2.836    | 0.00554  | 0.033482 | 1 |
| ENSG0000 | mucosal h | Inflamed | CTC-360G protein_cc  | chr19 | 39399620 | 39402798 | - | 1057  | 5.801909 | 0.167064 | 0.537768 | 0.18966  | 2.83544  | 0.005549 | 0.033528 | 1 |
| ENSG0000 | mucosal h | Inflamed | CTC-303L1 pseudoger  | chr5  | 93928473 | 93930496 | + | 2024  | 1.455847 | 0.670644 | 0.46131  | 0.16272  | 2.834998 | 0.005556 | 0.033561 | 1 |
| ENSG0000 | mucosal h | Inflamed | CACNB1 protein_cc    | chr17 | 37329709 | 37353956 | - | 7094  | 565.9928 | 0        | 0.484106 | 0.170764 | 2.834944 | 0.005557 | 0.033561 | 1 |
| ENSG0000 | mucosal h | Inflamed | PXDN protein_cc      | chr2  | 1635659  | 1748624  | - | 11257 | 5075.432 | 0        | -0.65919 | 0.232604 | -2.83396 | 0.005573 | 0.033646 | 1 |
| ENSG0000 | mucosal h | Inflamed | AC115522 lincRNA     | chr19 | 44298461 | 44299810 | - | 556   | 11.72554 | 0.090692 | -0.59725 | 0.21075  | -2.83391 | 0.005573 | 0.033646 | 1 |
| ENSG0000 | mucosal h | Inflamed | CD276 protein_cc     | chr15 | 73976307 | 74006859 | + | 5542  | 3026.611 | 0        | -0.43356 | 0.153001 | -2.83374 | 0.005576 | 0.033655 | 1 |
| ENSG0000 | mucosal h | Inflamed | TTC13 protein_cc     | chr1  | 2.31E+08 | 2.31E+08 | - | 4212  | 864.1193 | 0        | 0.550461 | 0.194305 | 2.832975 | 0.005589 | 0.033721 | 1 |
| ENSG0000 | mucosal h | Inflamed | SDHD protein_cc      | chr11 | 1.12E+08 | 1.12E+08 | + | 2126  | 2885.582 | 0        | 0.441858 | 0.156063 | 2.831276 | 0.005616 | 0.03388  | 1 |
| ENSG0000 | mucosal h | Inflamed | HS3ST3A1 protein_cc  | chr17 | 13399006 | 13505244 | - | 2628  | 82.91169 | 0.004773 | -0.72888 | 0.257454 | -2.83111 | 0.005619 | 0.033888 | 1 |
| ENSG0000 | mucosal h | Inflamed | OAZ1 protein_cc      | chr19 | 2269485  | 2273487  | + | 3457  | 15996.95 | 0        | -0.24725 | 0.08734  | -2.83085 | 0.005623 | 0.033906 | 1 |
| ENSG0000 | mucosal h | Inflamed | SSR2 protein_cc      | chr1  | 1.56E+08 | 1.56E+08 | - | 6651  | 7011.072 | 0        | -0.27357 | 0.09665  | -2.8305  | 0.005629 | 0.033932 | 1 |
| ENSG0000 | mucosal h | Inflamed | RP11-454L pseudoger  | chr14 | 55861658 | 55861951 | - | 294   | 10.81862 | 0.121718 | 0.701925 | 0.248017 | 2.830144 | 0.005635 | 0.033959 | 1 |
| ENSG0000 | mucosal h | Inflamed | LSM11 protein_cc     | chr5  | 1.57E+08 | 1.57E+08 | + | 6584  | 399.2864 | 0        | 0.474891 | 0.167819 | 2.829786 | 0.00564  | 0.033987 | 1 |
| ENSG0000 | mucosal h | Inflamed | AC084809 antisense   | chr17 | 31203777 | 31205655 | + | 591   | 14.36277 | 0.00716  | 0.348652 | 0.123229 | 2.829293 | 0.005648 | 0.034027 | 1 |
| ENSG0000 | mucosal h | Inflamed | CTC-340I2 antisense  | chr5  | 1.56E+08 | 1.56E+08 | - | 460   | 1.124105 | 0.75179  | -0.45622 | 0.161273 | -2.82886 | 0.005655 | 0.034062 | 1 |
| ENSG0000 | mucosal h | Inflamed | GPR160 protein_cc    | chr3  | 1.7E+08  | 1.7E+08  | + | 4458  | 1514.215 | 0        | 0.497197 | 0.175782 | 2.828487 | 0.005662 | 0.034091 | 1 |
| ENSG0000 | mucosal h | Inflamed | AGXT protein_cc      | chr2  | 2.42E+08 | 2.42E+08 | + | 4459  | 47.78759 | 0.01432  | 0.940742 | 0.332651 | 2.828018 | 0.005669 | 0.034125 | 1 |
| ENSG0000 | mucosal h | Inflamed | ATAT1 protein_cc     | chr6  | 30594619 | 30614600 | + | 4035  | 544.105  | 0        | 0.409445 | 0.144783 | 2.827987 | 0.00567  | 0.034125 | 1 |
| ENSG0000 | mucosal h | Inflamed | TRAK2 protein_cc     | chr2  | 2.02E+08 | 2.02E+08 | - | 7595  | 2200.329 | 0        | 0.590416 | 0.20882  | 2.827396 | 0.005679 | 0.034175 | 1 |
| ENSG0000 | mucosal h | Inflamed | A1CF protein_cc      | chr10 | 52559169 | 52645435 | - | 9603  | 997.21   | 0.004773 | 0.940811 | 0.332764 | 2.82726  | 0.005682 | 0.034181 | 1 |
| ENSG0000 | mucosal h | Inflamed | LINC00992 lincRNA    | chr5  | 1.17E+08 | 1.17E+08 | + | 1144  | 40.78282 | 0.038186 | 0.857705 | 0.30338  | 2.827164 | 0.005683 | 0.034182 | 1 |
| ENSG0000 | mucosal h | Inflamed | FBXL12 protein_cc    | chr19 | 9920943  | 9938492  | - | 2913  | 895.7041 | 0        | 0.24455  | 0.086546 | 2.825655 | 0.005708 | 0.034324 | 1 |
| ENSG0000 | mucosal h | Inflamed | AL022341 antisense   | chr16 | 698473   | 699200   | - | 389   | 12.42482 | 0.026253 | -0.60352 | 0.213634 | -2.82504 | 0.005718 | 0.034377 | 1 |
| ENSG0000 | mucosal h | Inflamed | NDUFS1 protein_cc    | chr2  | 2.07E+08 | 2.07E+08 | - | 12268 | 4189.334 | 0        | 0.477068 | 0.168885 | 2.824816 | 0.005722 | 0.034384 | 1 |
| ENSG0000 | mucosal h | Inflamed | MS4A12 protein_cc    | chr11 | 60260251 | 60274903 | + | 1839  | 4291.945 | 0.004773 | 1.492446 | 0.528334 | 2.824812 | 0.005722 | 0.034384 | 1 |
| ENSG0000 | mucosal h | Inflamed | LRWD1 protein_cc     | chr7  | 1.02E+08 | 1.02E+08 | + | 5926  | 948.2458 | 0        | -0.2782  | 0.098494 | -2.82453 | 0.005726 | 0.034403 | 1 |
| ENSG0000 | mucosal h | Inflamed | RP11-142C sense_intr | chr17 | 29460200 | 29465536 | + | 2780  | 0.957041 | 0.749403 | 0.32881  | 0.116436 | 2.823957 | 0.005736 | 0.034453 | 1 |
| ENSG0000 | mucosal h | Inflamed | GIMAP4 protein_cc    | chr7  | 1.5E+08  | 1.5E+08  | + | 2191  | 805.864  | 0        | -0.60941 | 0.215838 | -2.82347 | 0.005744 | 0.034494 | 1 |
| ENSG0000 | mucosal h | Inflamed | SLC35D1 protein_cc   | chr1  | 67465015 | 67519782 | - | 7154  | 4387.673 | 0        | 0.660081 | 0.233799 | 2.823282 | 0.005747 | 0.0345   | 1 |
| ENSG0000 | mucosal h | Inflamed | AC092580 lincRNA     | chr2  | 7865932  | 7870836  | + | 243   | 38.45823 | 0        | -0.59123 | 0.209416 | -2.82324 | 0.005748 | 0.0345   | 1 |

|          |           |          |           |            |       |          |          |   |       |          |          |          |          |          |          |          |   |
|----------|-----------|----------|-----------|------------|-------|----------|----------|---|-------|----------|----------|----------|----------|----------|----------|----------|---|
| ENSG0000 | mucosal h | Inflamed | CD4       | protein_cc | chr12 | 6896024  | 6929974  | + | 4583  | 4818.337 | 0        | -0.48515 | 0.171869 | -2.82281 | 0.005755 | 0.034535 | 1 |
| ENSG0000 | mucosal h | Inflamed | CTD-2639E | sense_ove  | chr19 | 49429428 | 49429701 | + | 274   | 1.011933 | 0.735084 | 0.339954 | 0.120448 | 2.822408 | 0.005762 | 0.034567 | 1 |
| ENSG0000 | mucosal h | Inflamed | KISS1     | protein_cc | chr1  | 2.04E+08 | 2.04E+08 | - | 709   | 3.649165 | 0.429594 | 0.563562 | 0.19969  | 2.822185 | 0.005765 | 0.034571 | 1 |
| ENSG0000 | mucosal h | Inflamed | RP11-654E | lincRNA    | chr12 | 90276442 | 90383066 | + | 682   | 2.513126 | 0.553699 | 0.484258 | 0.17159  | 2.822183 | 0.005765 | 0.034571 | 1 |
| ENSG0000 | mucosal h | Inflamed | MIR200B   | miRNA      | chr1  | 1102484  | 1102578  | + | 95    | 13.68735 | 0.081146 | 0.701404 | 0.248537 | 2.822133 | 0.005766 | 0.034571 | 1 |
| ENSG0000 | mucosal h | Inflamed | AC004771  | pseudoger  | chr17 | 4890302  | 4890972  | + | 669   | 3.343675 | 0.355609 | 0.488198 | 0.173019 | 2.821649 | 0.005774 | 0.034612 | 1 |
| ENSG0000 | mucosal h | Inflamed | PKDCC     | protein_cc | chr2  | 42275160 | 42285668 | + | 3925  | 2307.37  | 0        | 0.502919 | 0.178245 | 2.821504 | 0.005777 | 0.034618 | 1 |
| ENSG0000 | mucosal h | Inflamed | RN7SL619I | misc_RNA   | chr19 | 13925880 | 13926133 | - | 254   | 3.47494  | 0.365155 | 0.450954 | 0.15984  | 2.821279 | 0.00578  | 0.034633 | 1 |
| ENSG0000 | mucosal h | Inflamed | NPR1      | protein_cc | chr1  | 1.54E+08 | 1.54E+08 | + | 5003  | 379.7828 | 0        | -0.6858  | 0.243089 | -2.82117 | 0.005782 | 0.034635 | 1 |
| ENSG0000 | mucosal h | Inflamed | IL11RA    | protein_cc | chr9  | 34650699 | 34661889 | + | 4271  | 433.5537 | 0        | 0.507558 | 0.179934 | 2.820807 | 0.005788 | 0.034664 | 1 |
| ENSG0000 | mucosal h | Inflamed | RP11-71G  | lincRNA    | chr1  | 1.57E+08 | 1.57E+08 | + | 471   | 2.966587 | 0.424821 | -0.54389 | 0.192822 | -2.82069 | 0.00579  | 0.034668 | 1 |
| ENSG0000 | mucosal h | Inflamed | PTGR1     | protein_cc | chr9  | 1.14E+08 | 1.14E+08 | - | 3722  | 1084.807 | 0        | 0.335268 | 0.118865 | 2.820579 | 0.005792 | 0.034671 | 1 |
| ENSG0000 | mucosal h | Inflamed | RP11-10N  | lincRNA    | chr1  | 24526730 | 24538183 | + | 1849  | 10.3031  | 0.181384 | 0.806778 | 0.286046 | 2.82045  | 0.005794 | 0.034676 | 1 |
| ENSG0000 | mucosal h | Inflamed | GPR35     | protein_cc | chr2  | 2.42E+08 | 2.42E+08 | + | 3144  | 2482.53  | 0        | 0.479623 | 0.170082 | 2.819954 | 0.005803 | 0.034713 | 1 |
| ENSG0000 | mucosal h | Inflamed | TIE1      | protein_cc | chr1  | 43766664 | 43788779 | + | 6694  | 996.0358 | 0        | -0.69789 | 0.247487 | -2.81992 | 0.005803 | 0.034713 | 1 |
| ENSG0000 | mucosal h | Inflamed | SCARNA17  | snoRNA     | chr18 | 47340503 | 47340646 | + | 144   | 4.398568 | 0.138425 | 0.399816 | 0.141787 | 2.819838 | 0.005805 | 0.034714 | 1 |
| ENSG0000 | mucosal h | Inflamed | FAM124B   | protein_cc | chr2  | 2.25E+08 | 2.25E+08 | - | 3541  | 38.74463 | 0.016706 | -0.62231 | 0.220717 | -2.81946 | 0.005811 | 0.034735 | 1 |
| ENSG0000 | mucosal h | Inflamed | AC098828  | lincRNA    | chr2  | 20263617 | 20306590 | - | 746   | 2.116945 | 0.610979 | 0.403918 | 0.143261 | 2.819463 | 0.005811 | 0.034735 | 1 |
| ENSG0000 | mucosal h | Inflamed | PAG1      | protein_cc | chr8  | 81880045 | 82024303 | - | 11023 | 2494.279 | 0        | 0.64494  | 0.228761 | 2.819274 | 0.005814 | 0.034739 | 1 |
| ENSG0000 | mucosal h | Inflamed | MTATP8P2  | pseudoger  | chr2  | 88124461 | 88124662 | + | 202   | 22.8401  | 0.047733 | 0.604814 | 0.21453  | 2.819249 | 0.005814 | 0.034739 | 1 |
| ENSG0000 | mucosal h | Inflamed | TTC19     | protein_cc | chr17 | 15902694 | 15948329 | + | 5966  | 1965.31  | 0        | 0.454953 | 0.161377 | 2.819193 | 0.005815 | 0.034739 | 1 |
| ENSG0000 | mucosal h | Inflamed | JHDM1D-A  | antisense  | chr7  | 1.4E+08  | 1.4E+08  | + | 2380  | 844.673  | 0        | 0.340799 | 0.120914 | 2.818535 | 0.005826 | 0.034797 | 1 |
| ENSG0000 | mucosal h | Inflamed | LINC00675 | lincRNA    | chr17 | 10698230 | 10707416 | - | 1648  | 1688.477 | 0.002387 | 0.806612 | 0.286204 | 2.818314 | 0.00583  | 0.034811 | 1 |
| ENSG0000 | mucosal h | Inflamed | F2RL1     | protein_cc | chr5  | 76114758 | 76131140 | + | 2958  | 3918.482 | 0        | 0.677333 | 0.240362 | 2.817975 | 0.005836 | 0.03483  | 1 |
| ENSG0000 | mucosal h | Inflamed | RP11-88H  | sense_intr | chr3  | 65344943 | 65345392 | - | 450   | 2.171838 | 0.479714 | 0.419347 | 0.148812 | 2.817966 | 0.005836 | 0.03483  | 1 |
| ENSG0000 | mucosal h | Inflamed | SSR3      | protein_cc | chr3  | 1.56E+08 | 1.56E+08 | - | 4627  | 5107.945 | 0        | -0.39531 | 0.140313 | -2.81738 | 0.005846 | 0.034881 | 1 |
| ENSG0000 | mucosal h | Inflamed | LYSMD4    | protein_cc | chr15 | 1E+08    | 1E+08    | - | 5691  | 406.0525 | 0        | 0.345623 | 0.122691 | 2.817023 | 0.005852 | 0.034909 | 1 |
| ENSG0000 | mucosal h | Inflamed | AK3       | protein_cc | chr9  | 4711155  | 4742043  | - | 2808  | 2512.807 | 0        | 0.434003 | 0.154105 | 2.816291 | 0.005864 | 0.034974 | 1 |
| ENSG0000 | mucosal h | Inflamed | CTD-2377C | antisense  | chr5  | 74161718 | 74163679 | + | 1962  | 3.331742 | 0.291169 | 0.488699 | 0.17356  | 2.815739 | 0.005873 | 0.035019 | 1 |
| ENSG0000 | mucosal h | Inflamed | DMBX1     | protein_cc | chr1  | 46972668 | 46979898 | + | 2896  | 1.539379 | 0.675418 | -0.54908 | 0.195013 | -2.8156  | 0.005876 | 0.035019 | 1 |
| ENSG0000 | mucosal h | Inflamed | ILVBL     | protein_cc | chr19 | 15225795 | 15236596 | - | 5615  | 3424.095 | 0        | 0.295377 | 0.104909 | 2.815542 | 0.005877 | 0.035019 | 1 |
| ENSG0000 | mucosal h | Inflamed | IGFBP4    | protein_cc | chr17 | 38599702 | 38613983 | + | 2211  | 14504.21 | 0        | -0.53395 | 0.189648 | -2.81548 | 0.005878 | 0.035019 | 1 |
| ENSG0000 | mucosal h | Inflamed | BFSP2-AS1 | antisense  | chr3  | 1.33E+08 | 1.33E+08 | - | 894   | 3.708831 | 0.326969 | -0.58391 | 0.207395 | -2.81546 | 0.005878 | 0.035019 | 1 |
| ENSG0000 | mucosal h | Inflamed | METAP1D   | protein_cc | chr2  | 1.73E+08 | 1.73E+08 | + | 4850  | 244.4296 | 0        | 0.434783 | 0.154457 | 2.81492  | 0.005887 | 0.035065 | 1 |
| ENSG0000 | mucosal h | Inflamed | GNG8      | protein_cc | chr19 | 47137333 | 47137942 | - | 216   | 5.553699 | 0.24105  | -0.6038  | 0.214514 | -2.81474 | 0.00589  | 0.035075 | 1 |
| ENSG0000 | mucosal h | Inflamed | CNGA4     | protein_cc | chr11 | 6255995  | 6265659  | + | 2167  | 4.828162 | 0.205251 | 0.452636 | 0.160843 | 2.814142 | 0.0059   | 0.035128 | 1 |
| ENSG0000 | mucosal h | Inflamed | ZNF91     | protein_cc | chr19 | 23487793 | 23578362 | - | 10397 | 773.3747 | 0        | 0.648586 | 0.230531 | 2.813445 | 0.005912 | 0.03519  | 1 |
| ENSG0000 | mucosal h | Inflamed | AL139099  | protein_cc | chr14 | 50064193 | 50065882 | - | 1690  | 23.13126 | 0.009547 | 0.504928 | 0.179523 | 2.812613 | 0.005926 | 0.035266 | 1 |
| ENSG0000 | mucosal h | Inflamed | PDIA6     | protein_cc | chr2  | 10923517 | 10978103 | - | 4101  | 10690.01 | 0        | -0.32926 | 0.117078 | -2.81235 | 0.005931 | 0.035285 | 1 |
| ENSG0000 | mucosal h | Inflamed | HSD17B14  | protein_cc | chr19 | 49316274 | 49339935 | - | 1281  | 106.7924 | 0        | -0.48265 | 0.171632 | -2.81209 | 0.005935 | 0.035303 | 1 |

|          |           |          |            |            |       |          |          |   |      |          |          |          |          |          |          |          |   |
|----------|-----------|----------|------------|------------|-------|----------|----------|---|------|----------|----------|----------|----------|----------|----------|----------|---|
| ENSG0000 | mucosal h | Inflamed | RP11-7K24  | lincRNA    | chr6  | 42059976 | 42061997 | - | 2022 | 92.06205 | 0.002387 | -0.65933 | 0.234476 | -2.81191 | 0.005938 | 0.035314 | 1 |
| ENSG0000 | mucosal h | Inflamed | BPIFB1     | protein_cc | chr20 | 31861286 | 31897684 | + | 3101 | 10.08115 | 0.763723 | -0.95154 | 0.338439 | -2.81154 | 0.005945 | 0.035334 | 1 |
| ENSG0000 | mucosal h | Inflamed | TMEM258    | protein_cc | chr11 | 61535973 | 61560274 | - | 3068 | 2003.086 | 0        | -0.47165 | 0.167763 | -2.8114  | 0.005947 | 0.035334 | 1 |
| ENSG0000 | mucosal h | Inflamed | FLI1       | protein_cc | chr11 | 1.29E+08 | 1.29E+08 | + | 8479 | 1230.11  | 0        | -0.57705 | 0.205255 | -2.81135 | 0.005948 | 0.035334 | 1 |
| ENSG0000 | mucosal h | Inflamed | RP5-11424  | antisense  | chr16 | 88797588 | 88807826 | + | 4790 | 8.53222  | 0.102625 | 0.556543 | 0.197964 | 2.811327 | 0.005948 | 0.035334 | 1 |
| ENSG0000 | mucosal h | Inflamed | FFAR3      | protein_cc | chr19 | 35849362 | 35851387 | + | 1855 | 15.69451 | 0.157518 | -0.91121 | 0.324122 | -2.81132 | 0.005949 | 0.035334 | 1 |
| ENSG0000 | mucosal h | Inflamed | RP11-8L8.1 | lincRNA    | chr14 | 1.02E+08 | 1.02E+08 | + | 943  | 4.529833 | 0.195704 | -0.52318 | 0.186145 | -2.81059 | 0.005961 | 0.0354   | 1 |
| ENSG0000 | mucosal h | Inflamed | SMPDL3A    | protein_cc | chr6  | 1.23E+08 | 1.23E+08 | + | 2228 | 2417.757 | 0        | 0.586519 | 0.208696 | 2.810399 | 0.005964 | 0.035411 | 1 |
| ENSG0000 | mucosal h | Inflamed | SPATC1     | protein_cc | chr8  | 1.45E+08 | 1.45E+08 | + | 1954 | 18.34845 | 0.047733 | -0.70833 | 0.252073 | -2.81002 | 0.005971 | 0.035442 | 1 |
| ENSG0000 | mucosal h | Inflamed | NRN1       | protein_cc | chr6  | 5998232  | 6007200  | - | 1762 | 151.2172 | 0.002387 | -0.60396 | 0.215034 | -2.80867 | 0.005994 | 0.035572 | 1 |
| ENSG0000 | mucosal h | Inflamed | NIPAL2     | protein_cc | chr8  | 99202061 | 99306621 | - | 5599 | 1763.859 | 0        | 0.627608 | 0.223463 | 2.808547 | 0.005996 | 0.035576 | 1 |
| ENSG0000 | mucosal h | Inflamed | RP11-3911  | lincRNA    | chr3  | 40507957 | 40510078 | + | 2122 | 44.89499 | 0.004773 | 0.527235 | 0.187756 | 2.808082 | 0.006004 | 0.035614 | 1 |
| ENSG0000 | mucosal h | Inflamed | REEP4      | protein_cc | chr8  | 21995533 | 21999464 | - | 2266 | 1578.78  | 0        | 0.314623 | 0.112044 | 2.808023 | 0.006005 | 0.035614 | 1 |
| ENSG0000 | mucosal h | Inflamed | GRIN3A     | protein_cc | chr9  | 1.04E+08 | 1.05E+08 | - | 8121 | 143.2745 | 0.002387 | -1.0247  | 0.364995 | -2.80744 | 0.006015 | 0.035657 | 1 |
| ENSG0000 | mucosal h | Inflamed | GFER       | protein_cc | chr16 | 2034208  | 2037750  | + | 2687 | 1461.854 | 0        | 0.297975 | 0.106138 | 2.807431 | 0.006015 | 0.035657 | 1 |
| ENSG0000 | mucosal h | Inflamed | AP001469   | antisense  | chr21 | 47666804 | 47667596 | + | 390  | 2.608592 | 0.400955 | 0.44319  | 0.157867 | 2.807363 | 0.006017 | 0.035657 | 1 |
| ENSG0000 | mucosal h | Inflamed | RP3-462E2  | lincRNA    | chr12 | 1.12E+08 | 1.12E+08 | + | 569  | 56.79236 | 0.026253 | 0.554651 | 0.197583 | 2.807174 | 0.00602  | 0.035669 | 1 |
| ENSG0000 | mucosal h | Inflamed | DNMBP-A'   | antisense  | chr10 | 1.02E+08 | 1.02E+08 | + | 2336 | 37.42721 | 0.01432  | 0.66753  | 0.237801 | 2.80709  | 0.006021 | 0.035669 | 1 |
| ENSG0000 | mucosal h | Inflamed | RP11-439E  | sense_intr | chr1  | 2.47E+08 | 2.47E+08 | + | 1960 | 1.174224 | 0.704057 | 0.373937 | 0.133244 | 2.806418 | 0.006033 | 0.03573  | 1 |
| ENSG0000 | mucosal h | Inflamed | KB-1836B5  | sense_ove  | chr8  | 37920399 | 37921309 | + | 911  | 5.840095 | 0.126492 | 0.476277 | 0.16972  | 2.806251 | 0.006036 | 0.035739 | 1 |
| ENSG0000 | mucosal h | Inflamed | BSG        | protein_cc | chr19 | 571297   | 583493   | + | 3770 | 35587.35 | 0        | 0.329404 | 0.117388 | 2.806108 | 0.006038 | 0.035746 | 1 |
| ENSG0000 | mucosal h | Inflamed | GCG        | protein_cc | chr2  | 1.63E+08 | 1.63E+08 | - | 2378 | 1251.821 | 0.002387 | 1.292496 | 0.460659 | 2.805756 | 0.006044 | 0.035768 | 1 |
| ENSG0000 | mucosal h | Inflamed | TNFRSF13   | protein_cc | chr22 | 42321045 | 42322822 | - | 926  | 169.7422 | 0.002387 | -0.91825 | 0.327278 | -2.80573 | 0.006045 | 0.035768 | 1 |
| ENSG0000 | mucosal h | Inflamed | SH2D6      | protein_cc | chr2  | 85645844 | 85664152 | + | 3858 | 130.6062 | 0.011933 | 0.989694 | 0.352764 | 2.805544 | 0.006048 | 0.035779 | 1 |
| ENSG0000 | mucosal h | Inflamed | HSPA8P3    | pseudoger  | chr10 | 27003551 | 27004761 | + | 780  | 1.405728 | 0.622912 | 0.402043 | 0.143309 | 2.805427 | 0.00605  | 0.035783 | 1 |
| ENSG0000 | mucosal h | Inflamed | COQ3       | protein_cc | chr6  | 99817276 | 99842080 | - | 1458 | 191.8043 | 0        | 0.433648 | 0.154579 | 2.805343 | 0.006052 | 0.035784 | 1 |
| ENSG0000 | mucosal h | Inflamed | SLA2       | protein_cc | chr20 | 35240721 | 35274619 | - | 2757 | 224.9857 | 0        | -0.45898 | 0.16362  | -2.80519 | 0.006054 | 0.035792 | 1 |
| ENSG0000 | mucosal h | Inflamed | RP3-325F2  | antisense  | chr6  | 1.37E+08 | 1.37E+08 | + | 505  | 1.054893 | 0.756563 | -0.44274 | 0.15784  | -2.805   | 0.006057 | 0.035803 | 1 |
| ENSG0000 | mucosal h | Inflamed | LRRTM2     | protein_cc | chr5  | 1.38E+08 | 1.38E+08 | - | 6095 | 23.66348 | 0.033413 | -0.68476 | 0.24414  | -2.8048  | 0.006061 | 0.035816 | 1 |
| ENSG0000 | mucosal h | Inflamed | FGF7       | protein_cc | chr15 | 49715293 | 49780972 | + | 6657 | 384.3699 | 0        | -0.86951 | 0.310015 | -2.80472 | 0.006062 | 0.035816 | 1 |
| ENSG0000 | mucosal h | Inflamed | EVPLL      | protein_cc | chr17 | 18280976 | 18292961 | + | 2156 | 10.31265 | 0.138425 | 0.665068 | 0.237172 | 2.804161 | 0.006072 | 0.035865 | 1 |
| ENSG0000 | mucosal h | Inflamed | BTN2A2     | protein_cc | chr6  | 26383324 | 26395102 | + | 6398 | 779.6778 | 0        | -0.50037 | 0.178456 | -2.80389 | 0.006077 | 0.035886 | 1 |
| ENSG0000 | mucosal h | Inflamed | CTD-3010I  | lincRNA    | chr17 | 70638870 | 70640629 | + | 889  | 36.02625 | 0.011933 | 0.588991 | 0.2101   | 2.803388 | 0.006086 | 0.035918 | 1 |
| ENSG0000 | mucosal h | Inflamed | ACVR2B-A'  | antisense  | chr3  | 38492518 | 38496311 | - | 2517 | 25.30549 | 0.02148  | 0.534281 | 0.190584 | 2.803386 | 0.006086 | 0.035918 | 1 |
| ENSG0000 | mucosal h | Inflamed | RP11-137F  | lincRNA    | chr10 | 82194765 | 82196869 | + | 2105 | 275.5107 | 0        | 0.496498 | 0.17711  | 2.803334 | 0.006087 | 0.035918 | 1 |
| ENSG0000 | mucosal h | Inflamed | FILIP1L    | protein_cc | chr3  | 99548985 | 99833357 | - | 5897 | 1159.112 | 0        | -0.65269 | 0.232845 | -2.8031  | 0.006091 | 0.035934 | 1 |
| ENSG0000 | mucosal h | Inflamed | AC083900   | sense_intr | chr2  | 2.09E+08 | 2.09E+08 | - | 469  | 7.961814 | 0.109785 | 0.566855 | 0.202269 | 2.802478 | 0.006102 | 0.03599  | 1 |
| ENSG0000 | mucosal h | Inflamed | RNA5SP75   | rRNA       | chr1  | 2.05E+08 | 2.05E+08 | - | 111  | 1.558473 | 0.632458 | -0.48772 | 0.174047 | -2.80226 | 0.006105 | 0.036005 | 1 |
| ENSG0000 | mucosal h | Inflamed | FAHD2A     | protein_cc | chr2  | 96068469 | 96082364 | + | 5665 | 531.6253 | 0        | 0.217393 | 0.077605 | 2.801289 | 0.006122 | 0.036097 | 1 |
| ENSG0000 | mucosal h | Inflamed | GPR1       | protein_cc | chr2  | 2.07E+08 | 2.07E+08 | - | 2834 | 5.494033 | 0.193317 | -0.60081 | 0.214526 | -2.80065 | 0.006134 | 0.036155 | 1 |

|          |           |          |           |                  |          |          |   |       |          |          |          |          |          |          |          |   |
|----------|-----------|----------|-----------|------------------|----------|----------|---|-------|----------|----------|----------|----------|----------|----------|----------|---|
| ENSG0000 | mucosal h | Inflamed | FARP2     | protein_cc chr2  | 2.42E+08 | 2.42E+08 | + | 14413 | 3968.358 | 0        | 0.433465 | 0.154779 | 2.800535 | 0.006136 | 0.036159 | 1 |
| ENSG0000 | mucosal h | Inflamed | HOXB13    | protein_cc chr17 | 46802125 | 46806540 | - | 3467  | 2959.835 | 0.02864  | 1.689474 | 0.603326 | 2.800267 | 0.00614  | 0.036179 | 1 |
| ENSG0000 | mucosal h | Inflamed | PRRG2     | protein_cc chr19 | 50083903 | 50094272 | + | 1701  | 447.432  | 0        | 0.434079 | 0.155052 | 2.799564 | 0.006153 | 0.036237 | 1 |
| ENSG0000 | mucosal h | Inflamed | ESYT3     | protein_cc chr3  | 1.38E+08 | 1.38E+08 | + | 9816  | 16.67542 | 0.040573 | 0.600858 | 0.214627 | 2.799546 | 0.006153 | 0.036237 | 1 |
| ENSG0000 | mucosal h | Inflamed | RP11-404F | sense_intr chr14 | 96677197 | 96681155 | + | 460   | 2.890215 | 0.403341 | 0.497696 | 0.177786 | 2.799407 | 0.006155 | 0.036244 | 1 |
| ENSG0000 | mucosal h | Inflamed | HNRNPA1   | pseudoger chrX   | 1E+08    | 1E+08    | - | 1092  | 20.83532 | 0.126492 | 0.93254  | 0.333136 | 2.799274 | 0.006158 | 0.036249 | 1 |
| ENSG0000 | mucosal h | Inflamed | NVL       | protein_cc chr1  | 2.24E+08 | 2.25E+08 | - | 4895  | 533.611  | 0        | 0.383272 | 0.136925 | 2.799148 | 0.00616  | 0.036254 | 1 |
| ENSG0000 | mucosal h | Inflamed | PRR15     | protein_cc chr7  | 29603427 | 29606911 | + | 1982  | 4968.742 | 0.002387 | 0.916118 | 0.327341 | 2.798662 | 0.006169 | 0.036297 | 1 |
| ENSG0000 | mucosal h | Inflamed | SHISA4    | protein_cc chr1  | 2.02E+08 | 2.02E+08 | + | 1746  | 158.2291 | 0        | -0.58857 | 0.210394 | -2.79746 | 0.00619  | 0.036414 | 1 |
| ENSG0000 | mucosal h | Inflamed | PPM1F     | protein_cc chr22 | 22273793 | 22307209 | - | 7318  | 2164.461 | 0        | -0.48601 | 0.17378  | -2.79667 | 0.006204 | 0.036488 | 1 |
| ENSG0000 | mucosal h | Inflamed | PROB1     | protein_cc chr5  | 1.39E+08 | 1.39E+08 | - | 3251  | 86.71599 | 0.01432  | -0.65146 | 0.232953 | -2.79652 | 0.006207 | 0.036496 | 1 |
| ENSG0000 | mucosal h | Inflamed | MXI1      | protein_cc chr10 | 1.12E+08 | 1.12E+08 | + | 4607  | 2496.305 | 0        | 0.630882 | 0.22566  | 2.795719 | 0.006221 | 0.036571 | 1 |
| ENSG0000 | mucosal h | Inflamed | PP13439   | protein_cc chr3  | 1.72E+08 | 1.72E+08 | - | 2906  | 18.6611  | 0.062053 | 0.758259 | 0.271248 | 2.795446 | 0.006226 | 0.036592 | 1 |
| ENSG0000 | mucosal h | Inflamed | RP11-422J | antisense chr1   | 37920480 | 37940012 | - | 1395  | 186.0835 | 0        | -0.32075 | 0.114756 | -2.7951  | 0.006232 | 0.03662  | 1 |
| ENSG0000 | mucosal h | Inflamed | TMCO1     | protein_cc chr1  | 1.66E+08 | 1.66E+08 | - | 3082  | 2334.036 | 0        | 0.355547 | 0.127211 | 2.794948 | 0.006235 | 0.036628 | 1 |
| ENSG0000 | mucosal h | Inflamed | RP4-671G  | antisense chr1   | 1.13E+08 | 1.13E+08 | - | 643   | 5.224344 | 0.169451 | 0.491181 | 0.175748 | 2.794807 | 0.006237 | 0.036634 | 1 |
| ENSG0000 | mucosal h | Inflamed | CTC-349C  | protein_cc chr5  | 1.34E+08 | 1.35E+08 | + | 5007  | 56.00239 | 0.004773 | 0.482074 | 0.172502 | 2.794606 | 0.006241 | 0.036647 | 1 |
| ENSG0000 | mucosal h | Inflamed | ZNF429    | protein_cc chr19 | 21679484 | 21739072 | + | 5019  | 153.864  | 0        | 0.523043 | 0.187187 | 2.794218 | 0.006248 | 0.03668  | 1 |
| ENSG0000 | mucosal h | Inflamed | OSGEP     | protein_cc chr14 | 20914570 | 20923264 | - | 5041  | 1095.396 | 0        | 0.28693  | 0.102693 | 2.794063 | 0.00625  | 0.036688 | 1 |
| ENSG0000 | mucosal h | Inflamed | RP4-761J1 | lincRNA chr12    | 6852151  | 6852807  | + | 657   | 8.899761 | 0.066826 | 0.522426 | 0.186993 | 2.793822 | 0.006255 | 0.036705 | 1 |
| ENSG0000 | mucosal h | Inflamed | FMO2      | protein_cc chr1  | 1.71E+08 | 1.71E+08 | + | 6239  | 17.35561 | 0.157518 | -0.958   | 0.342918 | -2.79368 | 0.006257 | 0.036712 | 1 |
| ENSG0000 | mucosal h | Inflamed | RP11-807F | pseudoger chr11  | 71869866 | 71870905 | + | 741   | 20.75418 | 0.396181 | 0.774987 | 0.277416 | 2.79359  | 0.006259 | 0.036713 | 1 |
| ENSG0000 | mucosal h | Inflamed | RP11-697E | lincRNA chr15    | 90788645 | 90789043 | + | 399   | 5.470167 | 0.128878 | 0.432798 | 0.154957 | 2.793023 | 0.006269 | 0.036764 | 1 |
| ENSG0000 | mucosal h | Inflamed | CMTM8     | protein_cc chr3  | 32280171 | 32411817 | + | 1174  | 269.5179 | 0        | 0.324072 | 0.116043 | 2.792692 | 0.006275 | 0.036791 | 1 |
| ENSG0000 | mucosal h | Inflamed | TRBV3-1   | TR_V_gene chr7   | 1.42E+08 | 1.42E+08 | + | 391   | 20.11933 | 0.019093 | -0.64031 | 0.229288 | -2.79261 | 0.006276 | 0.036791 | 1 |
| ENSG0000 | mucosal h | Inflamed | TMEM183   | protein_cc chr1  | 2.03E+08 | 2.03E+08 | + | 4026  | 1761.678 | 0        | 0.229781 | 0.082287 | 2.792429 | 0.00628  | 0.036802 | 1 |
| ENSG0000 | mucosal h | Inflamed | CD177     | polymorpt chr19  | 43857811 | 43867480 | + | 2776  | 12710.85 | 0        | 1.262189 | 0.452042 | 2.792193 | 0.006284 | 0.036816 | 1 |
| ENSG0000 | mucosal h | Inflamed | MTFR1L    | protein_cc chr1  | 26145131 | 26159432 | + | 5816  | 1599.535 | 0        | 0.203326 | 0.072821 | 2.792125 | 0.006285 | 0.036816 | 1 |
| ENSG0000 | mucosal h | Inflamed | PSMA8     | protein_cc chr18 | 23713816 | 23773319 | + | 1894  | 4.078759 | 0.372315 | -0.61849 | 0.221516 | -2.79207 | 0.006286 | 0.036816 | 1 |
| ENSG0000 | mucosal h | Inflamed | DUSP10    | protein_cc chr1  | 2.22E+08 | 2.22E+08 | - | 3474  | 251.4535 | 0        | -0.42041 | 0.150601 | -2.79153 | 0.006296 | 0.036861 | 1 |
| ENSG0000 | mucosal h | Inflamed | SLC1A3    | protein_cc chr5  | 36606457 | 36688436 | + | 6265  | 159.1384 | 0.002387 | -0.94878 | 0.339885 | -2.79149 | 0.006297 | 0.036861 | 1 |
| ENSG0000 | mucosal h | Inflamed | GOLGA6L9  | protein_cc chr15 | 83098710 | 83108085 | + | 6853  | 18.23866 | 0.073986 | 0.79549  | 0.285001 | 2.791179 | 0.006302 | 0.036885 | 1 |
| ENSG0000 | mucosal h | Inflamed | PDE9A     | protein_cc chr21 | 44073746 | 44195619 | + | 5266  | 2389.862 | 0        | 0.795244 | 0.284925 | 2.791063 | 0.006304 | 0.036889 | 1 |
| ENSG0000 | mucosal h | Inflamed | SCN9A     | protein_cc chr2  | 1.67E+08 | 1.67E+08 | - | 10368 | 188.4272 | 0        | 0.832243 | 0.298215 | 2.790746 | 0.00631  | 0.036914 | 1 |
| ENSG0000 | mucosal h | Inflamed | HEXIM1    | protein_cc chr17 | 43224684 | 43229468 | + | 4785  | 2103.606 | 0        | 0.341302 | 0.122304 | 2.790596 | 0.006313 | 0.036922 | 1 |
| ENSG0000 | mucosal h | Inflamed | KCNH8     | protein_cc chr3  | 19189946 | 19577138 | + | 6232  | 63.45107 | 0.011933 | 0.809434 | 0.290084 | 2.790345 | 0.006317 | 0.03694  | 1 |
| ENSG0000 | mucosal h | Inflamed | RP11-290F | sense_ove chr11  | 6129365  | 6206806  | - | 816   | 3.4821   | 0.288783 | 0.489356 | 0.175397 | 2.789994 | 0.006324 | 0.036969 | 1 |
| ENSG0000 | mucosal h | Inflamed | NDUFA5    | protein_cc chr7  | 1.23E+08 | 1.23E+08 | - | 9851  | 1240.439 | 0        | 0.405533 | 0.145403 | 2.789034 | 0.006341 | 0.037062 | 1 |
| ENSG0000 | mucosal h | Inflamed | NECAB3    | protein_cc chr20 | 32244893 | 32262269 | - | 4342  | 865.284  | 0        | 0.296367 | 0.106268 | 2.788852 | 0.006344 | 0.037073 | 1 |
| ENSG0000 | mucosal h | Inflamed | RHBDD1    | protein_cc chr2  | 2.28E+08 | 2.28E+08 | + | 6926  | 1166.01  | 0        | -0.3733  | 0.133875 | -2.7884  | 0.006353 | 0.037113 | 1 |

|          |           |          |           |            |       |          |          |   |       |          |          |          |          |          |          |          |   |
|----------|-----------|----------|-----------|------------|-------|----------|----------|---|-------|----------|----------|----------|----------|----------|----------|----------|---|
| ENSG0000 | mucosal h | Inflamed | MIR429    | miRNA      | chr1  | 1104385  | 1104467  | + | 83    | 49.8401  | 0.026253 | 0.76143  | 0.273126 | 2.787837 | 0.006363 | 0.037158 | 1 |
| ENSG0000 | mucosal h | Inflamed | ABCC8     | protein_cc | chr11 | 17414432 | 17498449 | - | 6835  | 59.01193 | 0.02148  | 0.831439 | 0.298247 | 2.787755 | 0.006364 | 0.037158 | 1 |
| ENSG0000 | mucosal h | Inflamed | FAM200B   | protein_cc | chr4  | 15683285 | 15707188 | + | 4817  | 454.0883 | 0        | 0.361134 | 0.129544 | 2.787742 | 0.006364 | 0.037158 | 1 |
| ENSG0000 | mucosal h | Inflamed | CNP       | protein_cc | chr17 | 40118759 | 40129749 | + | 7426  | 3126.033 | 0        | -0.27044 | 0.09704  | -2.78691 | 0.00638  | 0.037238 | 1 |
| ENSG0000 | mucosal h | Inflamed | PYCR1     | protein_cc | chr17 | 79890260 | 79900288 | - | 2886  | 2890.554 | 0        | -0.29702 | 0.10658  | -2.78679 | 0.006382 | 0.037243 | 1 |
| ENSG0000 | mucosal h | Inflamed | CCR7      | protein_cc | chr17 | 38710021 | 38721724 | - | 2508  | 573.3031 | 0        | -1.06061 | 0.380638 | -2.78639 | 0.006389 | 0.037269 | 1 |
| ENSG0000 | mucosal h | Inflamed | TMEM59    | protein_cc | chr1  | 54497347 | 54519177 | - | 4156  | 9095.427 | 0        | 0.304473 | 0.109272 | 2.786385 | 0.006389 | 0.037269 | 1 |
| ENSG0000 | mucosal h | Inflamed | XXbac-B47 | lincRNA    | chr22 | 18512151 | 18520734 | + | 2379  | 11.7685  | 0.21957  | -0.6795  | 0.243924 | -2.78571 | 0.006402 | 0.037333 | 1 |
| ENSG0000 | mucosal h | Inflamed | SERPINA7  | protein_cc | chrX  | 1.05E+08 | 1.05E+08 | - | 1980  | 1.038186 | 0.794749 | 0.31323  | 0.112448 | 2.785559 | 0.006404 | 0.037341 | 1 |
| ENSG0000 | mucosal h | Inflamed | SNX7      | protein_cc | chr1  | 99127236 | 99226056 | + | 2088  | 960.58   | 0        | 0.349111 | 0.125345 | 2.785205 | 0.006411 | 0.037362 | 1 |
| ENSG0000 | mucosal h | Inflamed | MAGI2     | protein_cc | chr7  | 77646393 | 79082890 | - | 9643  | 126.1766 | 0.002387 | 0.450456 | 0.161732 | 2.785203 | 0.006411 | 0.037362 | 1 |
| ENSG0000 | mucosal h | Inflamed | FGS       | protein_cc | chr9  | 1.31E+08 | 1.31E+08 | + | 4040  | 1848.718 | 0        | -0.29967 | 0.107597 | -2.78512 | 0.006412 | 0.037363 | 1 |
| ENSG0000 | mucosal h | Inflamed | FER1L6    | protein_cc | chr8  | 1.25E+08 | 1.25E+08 | + | 6058  | 1429.351 | 0.00716  | 1.07911  | 0.38752  | 2.784657 | 0.006421 | 0.037404 | 1 |
| ENSG0000 | mucosal h | Inflamed | RP5-874C2 | pseudoger  | chr6  | 28287437 | 28287629 | - | 193   | 0.840095 | 0.782816 | 0.336503 | 0.120849 | 2.784487 | 0.006424 | 0.037414 | 1 |
| ENSG0000 | mucosal h | Inflamed | HEG1      | protein_cc | chr3  | 1.25E+08 | 1.25E+08 | - | 9925  | 3341.647 | 0        | -0.63251 | 0.227176 | -2.78422 | 0.006429 | 0.037434 | 1 |
| ENSG0000 | mucosal h | Inflamed | EPHX1     | protein_cc | chr1  | 2.26E+08 | 2.26E+08 | + | 2504  | 2320.141 | 0        | 0.358871 | 0.128906 | 2.783984 | 0.006433 | 0.037451 | 1 |
| ENSG0000 | mucosal h | Inflamed | RP11-380F | lincRNA    | chr4  | 23724885 | 23735202 | - | 639   | 14.3747  | 0.212411 | 0.764976 | 0.2748   | 2.783751 | 0.006437 | 0.037467 | 1 |
| ENSG0000 | mucosal h | Inflamed | TDRD5     | protein_cc | chr1  | 1.8E+08  | 1.8E+08  | + | 4032  | 41.13365 | 0.040573 | 0.849212 | 0.305079 | 2.78358  | 0.006441 | 0.037477 | 1 |
| ENSG0000 | mucosal h | Inflamed | RP1-178F1 | antisense  | chr17 | 18171394 | 18172142 | + | 749   | 3.484487 | 0.243437 | 0.432105 | 0.155248 | 2.783321 | 0.006445 | 0.037493 | 1 |
| ENSG0000 | mucosal h | Inflamed | RP11-23J9 | processed  | chr9  | 1E+08    | 1E+08    | + | 3701  | 22.10501 | 0.050119 | 0.704032 | 0.25295  | 2.783281 | 0.006446 | 0.037493 | 1 |
| ENSG0000 | mucosal h | Inflamed | FRAS1     | protein_cc | chr4  | 78978724 | 79465423 | + | 18960 | 304.148  | 0.01432  | 1.121724 | 0.403073 | 2.782931 | 0.006453 | 0.037522 | 1 |
| ENSG0000 | mucosal h | Inflamed | ZNF77     | protein_cc | chr19 | 2933216  | 2944969  | - | 2437  | 102.537  | 0        | 0.382295 | 0.137395 | 2.782459 | 0.006461 | 0.037552 | 1 |
| ENSG0000 | mucosal h | Inflamed | RP11-517C | antisense  | chr14 | 58836741 | 58862359 | - | 399   | 1.644391 | 0.539379 | 0.384494 | 0.138185 | 2.782453 | 0.006461 | 0.037552 | 1 |
| ENSG0000 | mucosal h | Inflamed | TRBV20-1  | TR_V_gen   | chr7  | 1.42E+08 | 1.42E+08 | + | 413   | 57.4463  | 0.004773 | -0.73724 | 0.264963 | -2.78242 | 0.006462 | 0.037552 | 1 |
| ENSG0000 | mucosal h | Inflamed | NLRC4     | protein_cc | chr2  | 32449522 | 32490923 | - | 3624  | 111.9952 | 0.002387 | -0.70734 | 0.254261 | -2.78196 | 0.006471 | 0.03758  | 1 |
| ENSG0000 | mucosal h | Inflamed | MLLT4     | protein_cc | chr6  | 1.68E+08 | 1.68E+08 | + | 13424 | 6402.897 | 0        | 0.527656 | 0.189671 | 2.781947 | 0.006471 | 0.03758  | 1 |
| ENSG0000 | mucosal h | Inflamed | RP11-22P6 | antisense  | chr16 | 28873487 | 28874661 | - | 544   | 5.47494  | 0.116945 | 0.442566 | 0.159086 | 2.781929 | 0.006471 | 0.03758  | 1 |
| ENSG0000 | mucosal h | Inflamed | ATP5F1    | protein_cc | chr1  | 1.12E+08 | 1.12E+08 | + | 3383  | 5225.353 | 0        | 0.320091 | 0.11507  | 2.781694 | 0.006475 | 0.037597 | 1 |
| ENSG0000 | mucosal h | Inflamed | POFUT1    | protein_cc | chr20 | 30795683 | 30826470 | + | 6426  | 3356.37  | 0        | 0.365548 | 0.131445 | 2.780994 | 0.006488 | 0.037663 | 1 |
| ENSG0000 | mucosal h | Inflamed | COL8A1    | protein_cc | chr3  | 99357319 | 99518070 | + | 9408  | 718.8544 | 0.009547 | -1.12253 | 0.403653 | -2.78092 | 0.00649  | 0.037663 | 1 |
| ENSG0000 | mucosal h | Inflamed | RP3-355L5 | lincRNA    | chr6  | 1.06E+08 | 1.06E+08 | - | 541   | 7.844869 | 0.047733 | 0.448636 | 0.161342 | 2.78065  | 0.006495 | 0.037684 | 1 |
| ENSG0000 | mucosal h | Inflamed | RPL22L1   | protein_cc | chr3  | 1.71E+08 | 1.71E+08 | - | 2326  | 591.58   | 0        | -0.53167 | 0.191234 | -2.7802  | 0.006503 | 0.037715 | 1 |
| ENSG0000 | mucosal h | Inflamed | AC092171  | antisense  | chr7  | 5459477  | 5462753  | + | 753   | 2.610979 | 0.372315 | 0.429934 | 0.154641 | 2.780205 | 0.006503 | 0.037715 | 1 |
| ENSG0000 | mucosal h | Inflamed | KCND2     | protein_cc | chr7  | 1.2E+08  | 1.2E+08  | + | 5555  | 3.460621 | 0.630072 | -0.75908 | 0.27308  | -2.77968 | 0.006513 | 0.037763 | 1 |
| ENSG0000 | mucosal h | Inflamed | CD247     | protein_cc | chr1  | 1.67E+08 | 1.67E+08 | - | 4034  | 439.4893 | 0        | -0.49885 | 0.179476 | -2.77951 | 0.006516 | 0.037773 | 1 |
| ENSG0000 | mucosal h | Inflamed | TAL1      | protein_cc | chr1  | 47681962 | 47697892 | - | 5706  | 159.8544 | 0        | -0.54562 | 0.196324 | -2.77917 | 0.006522 | 0.037793 | 1 |
| ENSG0000 | mucosal h | Inflamed | MLKL      | protein_cc | chr16 | 74705753 | 74734858 | - | 5692  | 1538.064 | 0        | -0.48479 | 0.174435 | -2.77917 | 0.006522 | 0.037793 | 1 |
| ENSG0000 | mucosal h | Inflamed | RP11-79H2 | lincRNA    | chr8  | 79749764 | 79752757 | + | 2994  | 39.59666 | 0.031026 | -0.90565 | 0.325969 | -2.77832 | 0.006538 | 0.037876 | 1 |
| ENSG0000 | mucosal h | Inflamed | AC024592  | antisense  | chr19 | 5847478  | 5858250  | + | 1188  | 30.47255 | 0.085919 | 0.877185 | 0.315735 | 2.778228 | 0.00654  | 0.037878 | 1 |
| ENSG0000 | mucosal h | Inflamed | RP11-347C | lincRNA    | chr16 | 30366762 | 30367848 | + | 415   | 32.42721 | 0        | 0.317947 | 0.11445  | 2.778052 | 0.006543 | 0.037889 | 1 |

|          |           |          |           |                  |          |          |   |       |          |          |          |          |          |          |          |   |
|----------|-----------|----------|-----------|------------------|----------|----------|---|-------|----------|----------|----------|----------|----------|----------|----------|---|
| ENSG0000 | mucosal h | Inflamed | SORCS2    | protein_cc chr4  | 7194265  | 7744554  | + | 6292  | 650.494  | 0        | -0.81757 | 0.294343 | -2.77761 | 0.006551 | 0.037928 | 1 |
| ENSG0000 | mucosal h | Inflamed | RP11-561C | pseudoger chr15  | 85747141 | 85778026 | - | 3193  | 67.86874 | 0.004773 | 0.519141 | 0.186955 | 2.776829 | 0.006566 | 0.038004 | 1 |
| ENSG0000 | mucosal h | Inflamed | SLC25A41  | protein_cc chr19 | 6426048  | 6433790  | - | 1649  | 13.821   | 0.159905 | 0.642811 | 0.231572 | 2.775863 | 0.006584 | 0.038101 | 1 |
| ENSG0000 | mucosal h | Inflamed | KDELRL3   | protein_cc chr22 | 38864067 | 38879452 | + | 1929  | 1386.678 | 0        | -0.4048  | 0.145873 | -2.77505 | 0.006599 | 0.038181 | 1 |
| ENSG0000 | mucosal h | Inflamed | TRABD     | protein_cc chr22 | 50624344 | 50638027 | + | 3153  | 3435.053 | 0        | -0.27364 | 0.098622 | -2.77462 | 0.006607 | 0.038219 | 1 |
| ENSG0000 | mucosal h | Inflamed | SYT3      | protein_cc chr19 | 51124564 | 51171651 | - | 3832  | 7.51074  | 0.193317 | -0.65449 | 0.235895 | -2.77451 | 0.006609 | 0.038223 | 1 |
| ENSG0000 | mucosal h | Inflamed | PIIP5K1   | protein_cc chr15 | 43825660 | 43882430 | - | 8054  | 1083.162 | 0        | 0.470136 | 0.169483 | 2.773941 | 0.00662  | 0.038276 | 1 |
| ENSG0000 | mucosal h | Inflamed | TREML4    | protein_cc chr6  | 41196062 | 41206620 | + | 2712  | 4.245823 | 0.73031  | -0.5929  | 0.213774 | -2.77348 | 0.006629 | 0.038318 | 1 |
| ENSG0000 | mucosal h | Inflamed | TRAV4     | TR_V_gen chr14   | 22204434 | 22205264 | + | 395   | 15.00716 | 0.047733 | -0.64212 | 0.231536 | -2.77332 | 0.006632 | 0.038327 | 1 |
| ENSG0000 | mucosal h | Inflamed | SOSTDC1   | protein_cc chr7  | 16501106 | 16570205 | - | 2473  | 247.8663 | 0.011933 | 0.941214 | 0.339402 | 2.773158 | 0.006635 | 0.038336 | 1 |
| ENSG0000 | mucosal h | Inflamed | SCUBE2    | protein_cc chr11 | 9041071  | 9159661  | - | 7968  | 570.9189 | 0.002387 | 0.635074 | 0.229018 | 2.773024 | 0.006637 | 0.038343 | 1 |
| ENSG0000 | mucosal h | Inflamed | SNORA47   | snoRNA chr5      | 76376259 | 76376396 | - | 138   | 1.250597 | 0.668258 | 0.384004 | 0.138509 | 2.772404 | 0.006649 | 0.038398 | 1 |
| ENSG0000 | mucosal h | Inflamed | PRR5-ARH  | protein_cc chr22 | 45098113 | 45258586 | + | 3264  | 23.51074 | 0.057279 | 0.77841  | 0.280774 | 2.772366 | 0.00665  | 0.038398 | 1 |
| ENSG0000 | mucosal h | Inflamed | KRT1      | protein_cc chr12 | 53068520 | 53074191 | - | 2488  | 69.88783 | 0.016706 | -0.6891  | 0.248656 | -2.77128 | 0.00667  | 0.038507 | 1 |
| ENSG0000 | mucosal h | Inflamed | RP11-264E | lincRNA chr11    | 1.28E+08 | 1.28E+08 | - | 897   | 2.128878 | 0.615752 | -0.59062 | 0.213127 | -2.77121 | 0.006672 | 0.038507 | 1 |
| ENSG0000 | mucosal h | Inflamed | PARD6A    | protein_cc chr16 | 67694849 | 67696681 | + | 1488  | 126.3389 | 0        | -0.38538 | 0.139087 | -2.77077 | 0.00668  | 0.038547 | 1 |
| ENSG0000 | mucosal h | Inflamed | GABRR1    | protein_cc chr6  | 89887220 | 89940997 | - | 3772  | 2.560859 | 0.675418 | 0.586809 | 0.211829 | 2.770207 | 0.006691 | 0.0386   | 1 |
| ENSG0000 | mucosal h | Inflamed | GPR119    | protein_cc chrX  | 1.3E+08  | 1.3E+08  | - | 1193  | 5.116945 | 0.291169 | 0.680884 | 0.245799 | 2.770086 | 0.006693 | 0.038605 | 1 |
| ENSG0000 | mucosal h | Inflamed | RP11-168C | lincRNA chr1     | 2.01E+08 | 2.01E+08 | + | 3508  | 8.164678 | 0.157518 | -0.5846  | 0.21105  | -2.76995 | 0.006696 | 0.038612 | 1 |
| ENSG0000 | mucosal h | Inflamed | CPT2      | protein_cc chr1  | 53662101 | 53679869 | + | 3401  | 2631.277 | 0        | 0.431456 | 0.155782 | 2.769619 | 0.006702 | 0.03864  | 1 |
| ENSG0000 | mucosal h | Inflamed | RP11-893F | antisense chr17  | 48240884 | 48242677 | - | 1794  | 1.403341 | 0.653938 | 0.427855 | 0.154504 | 2.769217 | 0.00671  | 0.038675 | 1 |
| ENSG0000 | mucosal h | Inflamed | TMEM86A   | protein_cc chr11 | 18714669 | 18726332 | + | 4243  | 347.7566 | 0        | -0.37996 | 0.13723  | -2.76881 | 0.006718 | 0.038712 | 1 |
| ENSG0000 | mucosal h | Inflamed | SIGIRR    | protein_cc chr11 | 405716   | 417455   | - | 3496  | 2475.279 | 0        | 0.289664 | 0.104624 | 2.768621 | 0.006721 | 0.038724 | 1 |
| ENSG0000 | mucosal h | Inflamed | IQCH-AS1  | lincRNA chr15    | 67695957 | 67814182 | - | 6732  | 175.6158 | 0        | 0.484187 | 0.174903 | 2.768322 | 0.006727 | 0.038748 | 1 |
| ENSG0000 | mucosal h | Inflamed | GSC       | protein_cc chr14 | 95234553 | 95236562 | - | 1259  | 5.51074  | 0.341289 | -0.67669 | 0.244446 | -2.76824 | 0.006728 | 0.038749 | 1 |
| ENSG0000 | mucosal h | Inflamed | ART3      | protein_cc chr4  | 76932337 | 77033955 | + | 3278  | 59.89021 | 0.02148  | -1.00667 | 0.363718 | -2.76773 | 0.006738 | 0.03879  | 1 |
| ENSG0000 | mucosal h | Inflamed | RP3-428L1 | antisense chr6   | 1.61E+08 | 1.61E+08 | - | 2025  | 39.55609 | 0.004773 | -0.83967 | 0.303386 | -2.76765 | 0.00674  | 0.03879  | 1 |
| ENSG0000 | mucosal h | Inflamed | MT-ND6    | protein_cc chrM  | 14149    | 14673    | - | 525   | 5315.652 | 0        | 0.583142 | 0.2107   | 2.767639 | 0.00674  | 0.03879  | 1 |
| ENSG0000 | mucosal h | Inflamed | RPAIN     | protein_cc chr17 | 5322961  | 5336196  | + | 7430  | 915.9021 | 0        | 0.496674 | 0.179471 | 2.767435 | 0.006744 | 0.038804 | 1 |
| ENSG0000 | mucosal h | Inflamed | ZNF415    | protein_cc chr19 | 53611132 | 53636330 | - | 3780  | 99.49881 | 0        | 0.481199 | 0.17389  | 2.767262 | 0.006747 | 0.038814 | 1 |
| ENSG0000 | mucosal h | Inflamed | DCTD      | protein_cc chr4  | 1.84E+08 | 1.84E+08 | - | 3466  | 1971.033 | 0        | -0.21247 | 0.076793 | -2.76682 | 0.006756 | 0.038853 | 1 |
| ENSG0000 | mucosal h | Inflamed | BIRC3     | protein_cc chr11 | 1.02E+08 | 1.02E+08 | + | 7484  | 2899.189 | 0        | -0.86613 | 0.313064 | -2.76662 | 0.006759 | 0.038853 | 1 |
| ENSG0000 | mucosal h | Inflamed | DHRS4L2   | protein_cc chr14 | 24439148 | 24475617 | + | 2902  | 648.4773 | 0        | 0.251587 | 0.090937 | 2.766604 | 0.00676  | 0.038853 | 1 |
| ENSG0000 | mucosal h | Inflamed | R3HDM2    | protein_cc chr12 | 57643392 | 57824788 | - | 6267  | 1201.091 | 0        | 0.321999 | 0.116388 | 2.766599 | 0.00676  | 0.038853 | 1 |
| ENSG0000 | mucosal h | Inflamed | SAMD12    | protein_cc chr8  | 1.19E+08 | 1.2E+08  | - | 10756 | 611.821  | 0        | 0.661851 | 0.239235 | 2.766528 | 0.006761 | 0.038853 | 1 |
| ENSG0000 | mucosal h | Inflamed | ASH2L     | protein_cc chr8  | 37962760 | 38001594 | + | 5795  | 1444.325 | 0        | 0.27491  | 0.099379 | 2.766277 | 0.006766 | 0.038872 | 1 |
| ENSG0000 | mucosal h | Inflamed | ZFP91     | protein_cc chr11 | 58346584 | 58388515 | + | 5220  | 3349.926 | 0        | 0.477981 | 0.172799 | 2.766104 | 0.006769 | 0.038883 | 1 |
| ENSG0000 | mucosal h | Inflamed | EVX1      | protein_cc chr7  | 27282164 | 27290112 | + | 3110  | 37.66587 | 0.136038 | 1.212478 | 0.438393 | 2.765734 | 0.006776 | 0.038915 | 1 |
| ENSG0000 | mucosal h | Inflamed | RP11-333E | antisense chr17  | 5095379  | 5151364  | + | 2190  | 53.28401 | 0.004773 | 0.469694 | 0.169843 | 2.765454 | 0.006782 | 0.038938 | 1 |
| ENSG0000 | mucosal h | Inflamed | ACTL6B    | protein_cc chr7  | 1E+08    | 1E+08    | - | 2389  | 1.252983 | 0.692124 | 0.411195 | 0.148695 | 2.765355 | 0.006784 | 0.03894  | 1 |

|          |           |          |           |                            |          |          |   |       |          |          |          |          |          |          |          |   |
|----------|-----------|----------|-----------|----------------------------|----------|----------|---|-------|----------|----------|----------|----------|----------|----------|----------|---|
| ENSG0000 | mucosal h | Inflamed | DCAF11    | protein_cc chr14           | 24583404 | 24594451 | + | 6350  | 4773.403 | 0        | 0.24174  | 0.087437 | 2.764725 | 0.006796 | 0.039001 | 1 |
| ENSG0000 | mucosal h | Inflamed | ENPP7     | protein_cc chr17           | 77704681 | 77716021 | + | 3549  | 25.67303 | 0.217184 | -0.65752 | 0.237853 | -2.76441 | 0.006802 | 0.039025 | 1 |
| ENSG0000 | mucosal h | Inflamed | SMOC1     | protein_cc chr14           | 70320848 | 70499083 | + | 4369  | 369.2506 | 0        | -0.95915 | 0.346988 | -2.76421 | 0.006806 | 0.039025 | 1 |
| ENSG0000 | mucosal h | Inflamed | AVPR1B    | protein_cc chr1            | 2.06E+08 | 2.06E+08 | + | 2237  | 12.95704 | 0.136038 | 0.776672 | 0.280976 | 2.764192 | 0.006806 | 0.039025 | 1 |
| ENSG0000 | mucosal h | Inflamed | SPSB3     | protein_cc chr16           | 1826713  | 1843701  | - | 3192  | 1558.007 | 0        | 0.252295 | 0.091274 | 2.764167 | 0.006807 | 0.039025 | 1 |
| ENSG0000 | mucosal h | Inflamed | TFEC      | protein_cc chr7            | 1.16E+08 | 1.16E+08 | - | 8644  | 184.7613 | 0        | -0.75423 | 0.272868 | -2.76408 | 0.006808 | 0.039025 | 1 |
| ENSG0000 | mucosal h | Inflamed | PTGR2     | protein_cc chr14           | 74318547 | 74353530 | + | 8072  | 212.6492 | 0        | 0.550437 | 0.199145 | 2.764009 | 0.00681  | 0.039025 | 1 |
| ENSG0000 | mucosal h | Inflamed | SNHG9     | lincRNA chr16              | 2014960  | 2015510  | + | 551   | 115.4988 | 0        | -0.40377 | 0.146084 | -2.76397 | 0.006811 | 0.039025 | 1 |
| ENSG0000 | mucosal h | Inflamed | DHRS13    | protein_cc chr17           | 27224799 | 27230089 | - | 2944  | 418.7947 | 0        | -0.29999 | 0.108549 | -2.76365 | 0.006817 | 0.039041 | 1 |
| ENSG0000 | mucosal h | Inflamed | RHBDL1    | protein_cc chr16           | 725666   | 728268   | + | 1884  | 55.62053 | 0        | 0.439726 | 0.159113 | 2.763602 | 0.006818 | 0.039041 | 1 |
| ENSG0000 | mucosal h | Inflamed | DCST1     | protein_cc chr1            | 1.55E+08 | 1.55E+08 | + | 3193  | 3.22673  | 0.303103 | 0.4674   | 0.169131 | 2.763542 | 0.006819 | 0.039041 | 1 |
| ENSG0000 | mucosal h | Inflamed | FAM134B   | protein_cc chr5            | 16473147 | 16617167 | - | 4568  | 1022.263 | 0        | 0.703155 | 0.254448 | 2.763453 | 0.006821 | 0.039041 | 1 |
| ENSG0000 | mucosal h | Inflamed | CHCHD10   | protein_cc chr22           | 24108021 | 24110630 | - | 1360  | 4395.291 | 0        | 0.389823 | 0.141064 | 2.763448 | 0.006821 | 0.039041 | 1 |
| ENSG0000 | mucosal h | Inflamed | RP11-360F | lincRNA chr4               | 39135533 | 39137228 | + | 455   | 8.470167 | 0.176611 | -0.65066 | 0.235469 | -2.76324 | 0.006825 | 0.039043 | 1 |
| ENSG0000 | mucosal h | Inflamed | CTD-3195I | lincRNA chr17              | 3710042  | 3712148  | - | 2107  | 508.3699 | 0        | 0.533805 | 0.193182 | 2.763223 | 0.006825 | 0.039043 | 1 |
| ENSG0000 | mucosal h | Inflamed | RP11-780I | lincRNA chr17              | 19799903 | 19800600 | - | 698   | 26.179   | 0.026253 | 0.574006 | 0.207732 | 2.763197 | 0.006826 | 0.039043 | 1 |
| ENSG0000 | mucosal h | Inflamed | RP11-254I | lincRNA chr5               | 95549050 | 95550779 | - | 652   | 3.200477 | 0.596659 | -0.65224 | 0.236056 | -2.76309 | 0.006828 | 0.039046 | 1 |
| ENSG0000 | mucosal h | Inflamed | ZNF564    | protein_cc chr19           | 12636184 | 12662356 | - | 3622  | 10.81623 | 0.033413 | 0.469046 | 0.169771 | 2.762812 | 0.006833 | 0.039069 | 1 |
| ENSG0000 | mucosal h | Inflamed | RP11-557I | lincRNA chr6               | 1.35E+08 | 1.35E+08 | - | 1731  | 1.747017 | 0.570406 | -0.40678 | 0.147252 | -2.76248 | 0.006839 | 0.039097 | 1 |
| ENSG0000 | mucosal h | Inflamed | PLEKHJ1   | protein_cc chr19           | 2230002  | 2237703  | - | 4736  | 3312.258 | 0        | 0.316082 | 0.114426 | 2.762334 | 0.006842 | 0.039105 | 1 |
| ENSG0000 | mucosal h | Inflamed | CDK5      | protein_cc chr7            | 1.51E+08 | 1.51E+08 | - | 2938  | 332.821  | 0        | -0.29931 | 0.108369 | -2.76199 | 0.006849 | 0.039134 | 1 |
| ENSG0000 | mucosal h | Inflamed | RALBP1    | protein_cc chr18           | 9475007  | 9538114  | + | 4979  | 2936.1   | 0        | 0.383444 | 0.138843 | 2.761707 | 0.006854 | 0.039158 | 1 |
| ENSG0000 | mucosal h | Inflamed | NOL12     | protein_cc chr22           | 38077680 | 38170137 | + | 10909 | 785.1575 | 0        | 0.260719 | 0.094409 | 2.761589 | 0.006857 | 0.039162 | 1 |
| ENSG0000 | mucosal h | Inflamed | C1orf115  | protein_cc chr1            | 2.21E+08 | 2.21E+08 | + | 3413  | 3249.484 | 0        | 0.458457 | 0.166037 | 2.761174 | 0.006865 | 0.0392   | 1 |
| ENSG0000 | mucosal h | Inflamed | XK        | protein_cc chrX            | 37545012 | 37591383 | + | 5206  | 1135.031 | 0        | 0.721601 | 0.261356 | 2.760989 | 0.006868 | 0.039209 | 1 |
| ENSG0000 | mucosal h | Inflamed | ACSL4     | protein_cc chrX            | 1.09E+08 | 1.09E+08 | - | 6415  | 1924.143 | 0        | -0.90064 | 0.326207 | -2.76094 | 0.006869 | 0.039209 | 1 |
| ENSG0000 | mucosal h | Inflamed | NUDT12    | protein_cc chr5            | 1.03E+08 | 1.03E+08 | - | 4304  | 432.8425 | 0        | 0.637107 | 0.230786 | 2.760592 | 0.006876 | 0.039239 | 1 |
| ENSG0000 | mucosal h | Inflamed | LTBP4     | protein_cc chr19           | 41098789 | 41135725 | + | 8109  | 12185.94 | 0        | 0.566946 | 0.205457 | 2.759439 | 0.006899 | 0.039359 | 1 |
| ENSG0000 | mucosal h | Inflamed | WFS1      | protein_cc chr4            | 6271576  | 6304992  | + | 4513  | 1751.334 | 0        | -0.44023 | 0.159545 | -2.75927 | 0.006902 | 0.039366 | 1 |
| ENSG0000 | mucosal h | Inflamed | COL12A1   | protein_cc chr6            | 75794042 | 75915767 | - | 12476 | 5259.033 | 0        | -0.98744 | 0.357867 | -2.75923 | 0.006903 | 0.039366 | 1 |
| ENSG0000 | mucosal h | Inflamed | MLYCD     | protein_cc chr16           | 83932731 | 83949787 | + | 5317  | 716.5943 | 0        | 0.229541 | 0.0832   | 2.758906 | 0.006909 | 0.039393 | 1 |
| ENSG0000 | mucosal h | Inflamed | RP11-343I | antisense chr1             | 2.07E+08 | 2.07E+08 | - | 358   | 0.828162 | 0.794749 | -0.2939  | 0.106531 | -2.75878 | 0.006912 | 0.039399 | 1 |
| ENSG0000 | mucosal h | Inflamed | RAD51-AS1 | processed_transcript chr15 | 40978922 | 40987305 | - | 1696  | 312.7757 | 0        | 0.745225 | 0.27014  | 2.758664 | 0.006914 | 0.039403 | 1 |
| ENSG0000 | mucosal h | Inflamed | MYH15     | protein_cc chr3            | 1.08E+08 | 1.08E+08 | - | 7694  | 24.34368 | 0.00716  | 0.563762 | 0.204394 | 2.758213 | 0.006923 | 0.039443 | 1 |
| ENSG0000 | mucosal h | Inflamed | KAT8      | protein_cc chr16           | 31127075 | 31142714 | + | 4334  | 1436.678 | 0        | 0.200789 | 0.072799 | 2.758125 | 0.006925 | 0.039443 | 1 |
| ENSG0000 | mucosal h | Inflamed | LRFN5     | protein_cc chr14           | 42076773 | 42373752 | + | 6140  | 50.24344 | 0.050119 | -0.70793 | 0.256675 | -2.75808 | 0.006925 | 0.039443 | 1 |
| ENSG0000 | mucosal h | Inflamed | GSTP1     | protein_cc chr11           | 67351066 | 67354131 | + | 1925  | 8214.43  | 0        | -0.3513  | 0.127424 | -2.7569  | 0.006949 | 0.039567 | 1 |
| ENSG0000 | mucosal h | Inflamed | EFTUD1    | protein_cc chr15           | 82422571 | 82555104 | - | 4733  | 906.0501 | 0        | 0.519941 | 0.188616 | 2.756619 | 0.006954 | 0.03959  | 1 |
| ENSG0000 | mucosal h | Inflamed | RNF215    | protein_cc chr22           | 30773835 | 30817760 | - | 3079  | 277.2387 | 0        | -0.3576  | 0.129742 | -2.75627 | 0.006961 | 0.03962  | 1 |
| ENSG0000 | mucosal h | Inflamed | RP11-334L | pseudogene chr1            | 39174603 | 39176562 | + | 1960  | 9.873508 | 0.047733 | -0.49981 | 0.181354 | -2.75597 | 0.006967 | 0.039641 | 1 |

|          |           |          |           |            |       |          |          |   |       |          |          |          |          |          |          |          |   |
|----------|-----------|----------|-----------|------------|-------|----------|----------|---|-------|----------|----------|----------|----------|----------|----------|----------|---|
| ENSG0000 | mucosal h | Inflamed | RP3-405J1 | sense_intr | chr12 | 50579363 | 50585146 | - | 4713  | 72.72554 | 0.054893 | 1.005204 | 0.364741 | 2.755937 | 0.006968 | 0.039641 | 1 |
| ENSG0000 | mucosal h | Inflamed | PCDHB19P  | pseudoger  | chr5  | 1.41E+08 | 1.41E+08 | + | 2347  | 2.5179   | 0.429594 | 0.445252 | 0.161566 | 2.755851 | 0.006969 | 0.039642 | 1 |
| ENSG0000 | mucosal h | Inflamed | SIRPD     | protein_cc | chr20 | 1514897  | 1539489  | - | 1961  | 3.797136 | 0.322196 | -0.56387 | 0.204615 | -2.75575 | 0.006971 | 0.039644 | 1 |
| ENSG0000 | mucosal h | Inflamed | FAM177B   | protein_cc | chr1  | 2.23E+08 | 2.23E+08 | + | 2601  | 252.4057 | 0        | 0.701817 | 0.254746 | 2.754967 | 0.006987 | 0.039724 | 1 |
| ENSG0000 | mucosal h | Inflamed | RP4-655J1 | lincRNA    | chr1  | 1.17E+08 | 1.17E+08 | - | 1701  | 3.026253 | 0.355609 | 0.426496 | 0.154829 | 2.754632 | 0.006993 | 0.039739 | 1 |
| ENSG0000 | mucosal h | Inflamed | RP11-525k | antisense  | chr16 | 80188950 | 80597032 | - | 2990  | 17.25298 | 0.100239 | 0.819834 | 0.297626 | 2.754574 | 0.006995 | 0.039739 | 1 |
| ENSG0000 | mucosal h | Inflamed | C17orf72  | protein_cc | chr17 | 62075711 | 62081664 | + | 4142  | 15.74702 | 0.052506 | -0.52921 | 0.192123 | -2.75456 | 0.006995 | 0.039739 | 1 |
| ENSG0000 | mucosal h | Inflamed | GRAPL     | protein_cc | chr17 | 19030782 | 19062489 | + | 2028  | 2.052506 | 0.553699 | -0.45418 | 0.164884 | -2.75453 | 0.006995 | 0.039739 | 1 |
| ENSG0000 | mucosal h | Inflamed | ANKRD65   | protein_cc | chr1  | 1353800  | 1357149  | - | 2644  | 158.1074 | 0        | -0.65816 | 0.238947 | -2.75442 | 0.006998 | 0.039743 | 1 |
| ENSG0000 | mucosal h | Inflamed | SIGLEC14  | protein_cc | chr19 | 52145806 | 52150054 | - | 2082  | 206.0621 | 0.02864  | -0.85499 | 0.31045  | -2.75403 | 0.007005 | 0.039778 | 1 |
| ENSG0000 | mucosal h | Inflamed | PROSC     | protein_cc | chr8  | 37620111 | 37637283 | + | 3426  | 1898.532 | 0        | 0.311093 | 0.112962 | 2.753955 | 0.007007 | 0.039778 | 1 |
| ENSG0000 | mucosal h | Inflamed | RP11-369k | pseudoger  | chr8  | 12815896 | 12819709 | + | 1418  | 11.6611  | 0.088305 | 0.669758 | 0.243221 | 2.753695 | 0.007012 | 0.039798 | 1 |
| ENSG0000 | mucosal h | Inflamed | HIST2H2A  | protein_cc | chr1  | 1.5E+08  | 1.5E+08  | + | 437   | 11.08115 | 0.026253 | -0.49096 | 0.178323 | -2.75318 | 0.007022 | 0.039848 | 1 |
| ENSG0000 | mucosal h | Inflamed | PABPN1L   | protein_cc | chr16 | 88928034 | 88933068 | - | 1387  | 1.890215 | 0.568019 | -0.45232 | 0.164324 | -2.75258 | 0.007034 | 0.039907 | 1 |
| ENSG0000 | mucosal h | Inflamed | DUOX1     | protein_cc | chr15 | 45422131 | 45457774 | + | 8784  | 190.3771 | 0.002387 | -0.7966  | 0.289426 | -2.75232 | 0.007039 | 0.039928 | 1 |
| ENSG0000 | mucosal h | Inflamed | CTC-459F4 | pseudoger  | chr19 | 28294446 | 28294968 | + | 523   | 4.968974 | 0.164678 | 0.481467 | 0.174959 | 2.751878 | 0.007048 | 0.039968 | 1 |
| ENSG0000 | mucosal h | Inflamed | MMP13     | protein_cc | chr11 | 1.03E+08 | 1.03E+08 | - | 2834  | 133.4678 | 0.384248 | -1.74212 | 0.633079 | -2.75181 | 0.00705  | 0.039968 | 1 |
| ENSG0000 | mucosal h | Inflamed | ANKRD16   | protein_cc | chr10 | 5903580  | 5931869  | - | 3059  | 260.42   | 0        | -0.289   | 0.105033 | -2.75148 | 0.007056 | 0.039998 | 1 |
| ENSG0000 | mucosal h | Inflamed | KRTAP5-8  | protein_cc | chr11 | 71249071 | 71250253 | + | 1183  | 2.011933 | 0.508353 | 0.45005  | 0.163604 | 2.750857 | 0.007069 | 0.040043 | 1 |
| ENSG0000 | mucosal h | Inflamed | SRPRB     | protein_cc | chr3  | 1.34E+08 | 1.34E+08 | + | 4180  | 1779.78  | 0        | -0.35182 | 0.127895 | -2.75084 | 0.007069 | 0.040043 | 1 |
| ENSG0000 | mucosal h | Inflamed | CASP10    | protein_cc | chr2  | 2.02E+08 | 2.02E+08 | + | 7598  | 4318.632 | 0        | -0.49343 | 0.179374 | -2.75083 | 0.007069 | 0.040043 | 1 |
| ENSG0000 | mucosal h | Inflamed | FLT4      | protein_cc | chr5  | 1.8E+08  | 1.8E+08  | - | 8849  | 467.1384 | 0.002387 | -0.7347  | 0.267088 | -2.75077 | 0.00707  | 0.040043 | 1 |
| ENSG0000 | mucosal h | Inflamed | LANCL2    | protein_cc | chr7  | 55433141 | 55501435 | + | 5235  | 854.7208 | 0        | 0.278667 | 0.101308 | 2.750696 | 0.007072 | 0.040043 | 1 |
| ENSG0000 | mucosal h | Inflamed | CTC-205M  | sense_ove  | chr5  | 1.8E+08  | 1.8E+08  | - | 3088  | 114.7876 | 0.009547 | -0.58161 | 0.211519 | -2.74969 | 0.007092 | 0.040144 | 1 |
| ENSG0000 | mucosal h | Inflamed | HIST1H3E  | protein_cc | chr6  | 26225383 | 26225844 | + | 462   | 37.93317 | 0.00716  | 0.596014 | 0.216762 | 2.749626 | 0.007093 | 0.040144 | 1 |
| ENSG0000 | mucosal h | Inflamed | RP11-457M | lincRNA    | chr6  | 26686469 | 26688192 | + | 1724  | 28.88783 | 0.02864  | 0.754064 | 0.274248 | 2.749574 | 0.007094 | 0.040144 | 1 |
| ENSG0000 | mucosal h | Inflamed | CCDC30    | protein_cc | chr1  | 42929001 | 43120335 | + | 13539 | 58.27208 | 0.004773 | 0.557961 | 0.202934 | 2.749476 | 0.007096 | 0.040147 | 1 |
| ENSG0000 | mucosal h | Inflamed | DNAH5     | protein_cc | chr5  | 13690440 | 13944652 | - | 16475 | 32.81862 | 0.038186 | -0.82445 | 0.299926 | -2.74884 | 0.007109 | 0.040207 | 1 |
| ENSG0000 | mucosal h | Inflamed | MYH3      | protein_cc | chr17 | 10531843 | 10560626 | - | 6686  | 106.5346 | 0.019093 | 0.793853 | 0.288801 | 2.748792 | 0.00711  | 0.040207 | 1 |
| ENSG0000 | mucosal h | Inflamed | TMEM191   | lincRNA    | chr22 | 21820712 | 21825558 | + | 4299  | 17.29117 | 0.002387 | 0.408485 | 0.148614 | 2.748631 | 0.007113 | 0.040215 | 1 |
| ENSG0000 | mucosal h | Inflamed | ZNF223    | protein_cc | chr19 | 44555520 | 44572144 | + | 3329  | 45.96181 | 0.00716  | 0.696737 | 0.253491 | 2.748571 | 0.007115 | 0.040215 | 1 |
| ENSG0000 | mucosal h | Inflamed | SPRR2A    | protein_cc | chr1  | 1.53E+08 | 1.53E+08 | - | 709   | 15.94033 | 0.642005 | -1.19363 | 0.434295 | -2.74843 | 0.007117 | 0.040223 | 1 |
| ENSG0000 | mucosal h | Inflamed | ACER2     | protein_cc | chr9  | 19408925 | 19452018 | + | 2437  | 224.8759 | 0.01432  | 0.816623 | 0.297134 | 2.748331 | 0.007119 | 0.040225 | 1 |
| ENSG0000 | mucosal h | Inflamed | FBXO44    | protein_cc | chr1  | 11714432 | 11723384 | + | 3527  | 425.6897 | 0        | -0.48729 | 0.177313 | -2.74819 | 0.007122 | 0.040232 | 1 |
| ENSG0000 | mucosal h | Inflamed | RP11-378J | antisense  | chr1  | 2.23E+08 | 2.23E+08 | + | 1450  | 16.20525 | 0.00716  | 0.481932 | 0.175414 | 2.747398 | 0.007138 | 0.040314 | 1 |
| ENSG0000 | mucosal h | Inflamed | AC005789  | lincRNA    | chr19 | 38888821 | 38890521 | + | 1701  | 26.68496 | 0.026253 | -0.69293 | 0.25222  | -2.7473  | 0.00714  | 0.040316 | 1 |
| ENSG0000 | mucosal h | Inflamed | KLHDC9    | protein_cc | chr1  | 1.61E+08 | 1.61E+08 | + | 1720  | 114.4726 | 0        | 0.414971 | 0.151081 | 2.746688 | 0.007153 | 0.040378 | 1 |
| ENSG0000 | mucosal h | Inflamed | SNORA5C   | snoRNA     | chr7  | 45144505 | 45144641 | - | 137   | 14.36516 | 0.042959 | 0.492156 | 0.17921  | 2.746246 | 0.007162 | 0.04042  | 1 |
| ENSG0000 | mucosal h | Inflamed | RNF183    | protein_cc | chr9  | 1.16E+08 | 1.16E+08 | - | 3646  | 125.58   | 0.002387 | -0.86795 | 0.316065 | -2.7461  | 0.007165 | 0.04042  | 1 |
| ENSG0000 | mucosal h | Inflamed | APH1B     | protein_cc | chr15 | 63568217 | 63601325 | + | 5494  | 409.3246 | 0        | -0.40301 | 0.146756 | -2.74609 | 0.007165 | 0.04042  | 1 |



|          |           |          |           |                  |          |          |   |       |          |          |          |          |          |          |          |   |
|----------|-----------|----------|-----------|------------------|----------|----------|---|-------|----------|----------|----------|----------|----------|----------|----------|---|
| ENSG0000 | mucosal h | Inflamed | GET4      | protein_cc chr7  | 916189   | 936073   | + | 5392  | 377.7828 | 0        | 0.391442 | 0.142566 | 2.74569  | 0.007173 | 0.040452 | 1 |
| ENSG0000 | mucosal h | Inflamed | IFIT3     | protein_cc chr10 | 91087651 | 91100728 | + | 2640  | 622.8329 | 0        | -0.76536 | 0.278757 | -2.74563 | 0.007174 | 0.040452 | 1 |
| ENSG0000 | mucosal h | Inflamed | COL4A6    | protein_cc chrX  | 1.07E+08 | 1.08E+08 | - | 9942  | 476.1647 | 0        | 0.792058 | 0.288484 | 2.745583 | 0.007175 | 0.040452 | 1 |
| ENSG0000 | mucosal h | Inflamed | ACVR2B    | protein_cc chr3  | 38495342 | 38534633 | + | 15744 | 338.3174 | 0        | 0.50752  | 0.184858 | 2.745453 | 0.007178 | 0.040459 | 1 |
| ENSG0000 | mucosal h | Inflamed | CRISPLD1  | protein_cc chr8  | 75896750 | 75946793 | + | 4543  | 36.30072 | 0.045346 | -0.82114 | 0.299174 | -2.74469 | 0.007193 | 0.040537 | 1 |
| ENSG0000 | mucosal h | Inflamed | ALP2      | protein_cc chr11 | 1.3E+08  | 1.3E+08  | + | 7444  | 20839.55 | 0        | 0.409409 | 0.149188 | 2.744244 | 0.007202 | 0.04058  | 1 |
| ENSG0000 | mucosal h | Inflamed | C1orf131  | protein_cc chr1  | 2.31E+08 | 2.31E+08 | - | 5413  | 401.2482 | 0        | 0.399536 | 0.145609 | 2.743893 | 0.007209 | 0.040606 | 1 |
| ENSG0000 | mucosal h | Inflamed | MESP2     | protein_cc chr15 | 90303822 | 90321982 | + | 1780  | 37.2506  | 0.00716  | 0.593521 | 0.216308 | 2.743865 | 0.00721  | 0.040606 | 1 |
| ENSG0000 | mucosal h | Inflamed | HSPA13    | protein_cc chr21 | 15743436 | 15755805 | - | 4194  | 739.7303 | 0.002387 | -0.59393 | 0.216487 | -2.74347 | 0.007218 | 0.040643 | 1 |
| ENSG0000 | mucosal h | Inflamed | MARVELD1  | protein_cc chr5  | 68710939 | 68740157 | + | 4898  | 1449.692 | 0        | 0.650407 | 0.237101 | 2.743168 | 0.007224 | 0.040662 | 1 |
| ENSG0000 | mucosal h | Inflamed | BIN2      | protein_cc chr12 | 51674822 | 51718452 | - | 3976  | 1171.069 | 0        | -0.51079 | 0.186208 | -2.74315 | 0.007225 | 0.040662 | 1 |
| ENSG0000 | mucosal h | Inflamed | NOVA2     | protein_cc chr19 | 46436992 | 46476804 | - | 8684  | 197.58   | 0.01432  | -0.70345 | 0.256453 | -2.74299 | 0.007228 | 0.040672 | 1 |
| ENSG0000 | mucosal h | Inflamed | NFKBIZ    | protein_cc chr3  | 1.02E+08 | 1.02E+08 | + | 5902  | 4512.265 | 0        | -0.64752 | 0.236136 | -2.74214 | 0.007245 | 0.04076  | 1 |
| ENSG0000 | mucosal h | Inflamed | PIK3AP1   | protein_cc chr10 | 98353069 | 98480271 | - | 5691  | 1655.585 | 0        | -0.53025 | 0.193403 | -2.74169 | 0.007254 | 0.040804 | 1 |
| ENSG0000 | mucosal h | Inflamed | FYN       | protein_cc chr6  | 1.12E+08 | 1.12E+08 | - | 7411  | 1495.057 | 0        | -0.54928 | 0.200362 | -2.74144 | 0.007259 | 0.040824 | 1 |
| ENSG0000 | mucosal h | Inflamed | TP53INP2  | protein_cc chr20 | 33292094 | 33301243 | + | 4228  | 8214.155 | 0        | 0.479621 | 0.17496  | 2.741319 | 0.007262 | 0.040829 | 1 |
| ENSG0000 | mucosal h | Inflamed | PLIN3     | protein_cc chr19 | 4838353  | 4867780  | - | 2813  | 6114.582 | 0        | -0.37177 | 0.135635 | -2.74098 | 0.007269 | 0.040859 | 1 |
| ENSG0000 | mucosal h | Inflamed | RP5-831K1 | pseudoger chr1   | 81563952 | 81564690 | - | 739   | 2.649165 | 0.415274 | 0.386604 | 0.141063 | 2.740652 | 0.007276 | 0.040889 | 1 |
| ENSG0000 | mucosal h | Inflamed | CHMP4C    | protein_cc chr8  | 82644669 | 82671750 | + | 1866  | 646.136  | 0        | 0.609496 | 0.222407 | 2.740453 | 0.00728  | 0.040903 | 1 |
| ENSG0000 | mucosal h | Inflamed | RPP14     | protein_cc chr3  | 58291974 | 58310422 | + | 8608  | 1015.477 | 0        | 0.393101 | 0.143461 | 2.740131 | 0.007286 | 0.040929 | 1 |
| ENSG0000 | mucosal h | Inflamed | RTP4      | protein_cc chr3  | 1.87E+08 | 1.87E+08 | + | 1554  | 236.6683 | 0        | -0.42384 | 0.154683 | -2.74008 | 0.007287 | 0.040929 | 1 |
| ENSG0000 | mucosal h | Inflamed | RP11-282k | sense_intr chr12 | 19300008 | 19307593 | + | 5391  | 6.183771 | 0.124105 | 0.515285 | 0.18808  | 2.73971  | 0.007295 | 0.040963 | 1 |
| ENSG0000 | mucosal h | Inflamed | NUMA1     | protein_cc chr11 | 71713910 | 71791739 | - | 15212 | 17126.19 | 0        | 0.403855 | 0.147441 | 2.739094 | 0.007308 | 0.041025 | 1 |
| ENSG0000 | mucosal h | Inflamed | LGR6      | protein_cc chr1  | 2.02E+08 | 2.02E+08 | + | 4583  | 280.9212 | 0.004773 | 0.831737 | 0.303677 | 2.738892 | 0.007312 | 0.04104  | 1 |
| ENSG0000 | mucosal h | Inflamed | PPIAL4G   | protein_cc chr1  | 1.44E+08 | 1.44E+08 | - | 738   | 1.606205 | 0.603819 | -0.38071 | 0.139017 | -2.73857 | 0.007319 | 0.041069 | 1 |
| ENSG0000 | mucosal h | Inflamed | NAB2      | protein_cc chr12 | 57482677 | 57489259 | + | 3010  | 744.5322 | 0        | -0.51307 | 0.187412 | -2.73766 | 0.007337 | 0.041163 | 1 |
| ENSG0000 | mucosal h | Inflamed | RASAL3    | protein_cc chr19 | 15562435 | 15575382 | - | 4681  | 1285.778 | 0        | -0.57717 | 0.21085  | -2.73736 | 0.007344 | 0.041163 | 1 |
| ENSG0000 | mucosal h | Inflamed | MFHAS1    | protein_cc chr8  | 8640864  | 8751155  | - | 6883  | 2284.42  | 0        | 0.423428 | 0.154685 | 2.737353 | 0.007344 | 0.041163 | 1 |
| ENSG0000 | mucosal h | Inflamed | NPIP15    | protein_cc chr16 | 74411776 | 74425978 | + | 1428  | 273.031  | 0.138425 | 0.908287 | 0.331812 | 2.737352 | 0.007344 | 0.041163 | 1 |
| ENSG0000 | mucosal h | Inflamed | LGALS2    | protein_cc chr22 | 37966255 | 37978623 | - | 826   | 506.5632 | 0        | 0.672409 | 0.245648 | 2.73729  | 0.007345 | 0.041163 | 1 |
| ENSG0000 | mucosal h | Inflamed | RP1-257I2 | sense_intr chr22 | 42485634 | 42486032 | - | 399   | 21.38186 | 0.047733 | 0.710419 | 0.259535 | 2.737278 | 0.007345 | 0.041163 | 1 |
| ENSG0000 | mucosal h | Inflamed | PACS1     | protein_cc chr11 | 65837834 | 66012218 | + | 9037  | 2879.358 | 0        | -0.5461  | 0.199509 | -2.73722 | 0.007347 | 0.041163 | 1 |
| ENSG0000 | mucosal h | Inflamed | LSP1      | protein_cc chr11 | 1874200  | 1913497  | + | 5399  | 4886.85  | 0        | -0.52091 | 0.190311 | -2.73715 | 0.007348 | 0.041163 | 1 |
| ENSG0000 | mucosal h | Inflamed | AMY2B     | protein_cc chr1  | 1.04E+08 | 1.04E+08 | + | 7491  | 169.6325 | 0        | 0.820599 | 0.299809 | 2.737074 | 0.00735  | 0.041163 | 1 |
| ENSG0000 | mucosal h | Inflamed | LRRC18    | protein_cc chr10 | 50117528 | 50143242 | - | 1784  | 15.11695 | 0.064439 | 0.725346 | 0.265112 | 2.735997 | 0.007372 | 0.041263 | 1 |
| ENSG0000 | mucosal h | Inflamed | GSR       | protein_cc chr8  | 30535583 | 30585443 | - | 3232  | 4680.563 | 0        | 0.306242 | 0.111931 | 2.735992 | 0.007372 | 0.041263 | 1 |
| ENSG0000 | mucosal h | Inflamed | RP11-126L | antisense chr7   | 1E+08    | 1E+08    | - | 369   | 5.250597 | 0.152745 | 0.500762 | 0.183032 | 2.735928 | 0.007373 | 0.041263 | 1 |
| ENSG0000 | mucosal h | Inflamed | SLC22A31  | protein_cc chr16 | 89262406 | 89268072 | - | 2373  | 34.60859 | 0.02148  | -0.71804 | 0.262451 | -2.73591 | 0.007374 | 0.041263 | 1 |
| ENSG0000 | mucosal h | Inflamed | RPL23AP8  | pseudoger chr20  | 39825331 | 39825797 | + | 467   | 1.949881 | 0.505967 | 0.40466  | 0.147927 | 2.735543 | 0.007381 | 0.041297 | 1 |
| ENSG0000 | mucosal h | Inflamed | RP11-295I | sense_intr chr16 | 53202434 | 53203362 | + | 510   | 0.897375 | 0.76611  | 0.28485  | 0.104138 | 2.735314 | 0.007386 | 0.041315 | 1 |

|          |           |          |           |            |       |          |          |   |       |          |          |          |          |          |          |          |   |
|----------|-----------|----------|-----------|------------|-------|----------|----------|---|-------|----------|----------|----------|----------|----------|----------|----------|---|
| ENSG0000 | mucosal h | Inflamed | DPEP2     | protein_cc | chr16 | 68021297 | 68034489 | - | 3498  | 275.8377 | 0        | -0.53054 | 0.194001 | -2.73471 | 0.007399 | 0.041342 | 1 |
| ENSG0000 | mucosal h | Inflamed | RP11-7610 | antisense  | chr15 | 81616718 | 81654378 | + | 1349  | 36.53699 | 0        | -0.46491 | 0.170006 | -2.73467 | 0.007399 | 0.041342 | 1 |
| ENSG0000 | mucosal h | Inflamed | RP11-173E | pseudoger  | chr4  | 1.39E+08 | 1.39E+08 | + | 1238  | 1.386635 | 0.622912 | -0.32596 | 0.119197 | -2.73463 | 0.0074   | 0.041342 | 1 |
| ENSG0000 | mucosal h | Inflamed | TTC40     | protein_cc | chr10 | 1.35E+08 | 1.35E+08 | - | 10561 | 9.27685  | 0.188544 | -0.7114  | 0.26015  | -2.73458 | 0.007401 | 0.041342 | 1 |
| ENSG0000 | mucosal h | Inflamed | RP11-57H  | protein_cc | chr1  | 95583479 | 95712781 | + | 1961  | 2.164678 | 0.50358  | 0.369277 | 0.135044 | 2.734497 | 0.007403 | 0.041342 | 1 |
| ENSG0000 | mucosal h | Inflamed | TEX41     | lincRNA    | chr2  | 1.45E+08 | 1.46E+08 | + | 10623 | 3.813842 | 0.410501 | -0.63282 | 0.231423 | -2.73449 | 0.007403 | 0.041342 | 1 |
| ENSG0000 | mucosal h | Inflamed | RP11-797f | antisense  | chr7  | 64348905 | 64350478 | - | 1062  | 7.980907 | 0.171838 | 0.563851 | 0.2062   | 2.734486 | 0.007403 | 0.041342 | 1 |
| ENSG0000 | mucosal h | Inflamed | RP11-680C | lincRNA    | chr17 | 11191522 | 11194128 | + | 2607  | 2.775656 | 0.541766 | 0.674639 | 0.246716 | 2.734477 | 0.007404 | 0.041342 | 1 |
| ENSG0000 | mucosal h | Inflamed | ASPA      | protein_cc | chr17 | 3375668  | 3406713  | + | 5854  | 142.2124 | 0.004773 | 0.833588 | 0.304863 | 2.734303 | 0.007407 | 0.041354 | 1 |
| ENSG0000 | mucosal h | Inflamed | NPY4R     | protein_cc | chr10 | 47083534 | 47088320 | + | 1956  | 425.8449 | 0.011933 | 1.105414 | 0.4044   | 2.733465 | 0.007425 | 0.041443 | 1 |
| ENSG0000 | mucosal h | Inflamed | AC091878  | antisense  | chr5  | 17130137 | 17217156 | - | 2941  | 3.138425 | 0.513126 | -0.59489 | 0.217639 | -2.73337 | 0.007427 | 0.041445 | 1 |
| ENSG0000 | mucosal h | Inflamed | FAM69B    | protein_cc | chr9  | 1.4E+08  | 1.4E+08  | + | 2704  | 121.4463 | 0        | -0.63812 | 0.233496 | -2.73289 | 0.007437 | 0.041493 | 1 |
| ENSG0000 | mucosal h | Inflamed | KCNK5     | protein_cc | chr6  | 39156749 | 39197226 | - | 3756  | 2931.826 | 0        | 0.663143 | 0.242729 | 2.732034 | 0.007455 | 0.041578 | 1 |
| ENSG0000 | mucosal h | Inflamed | LRR8C     | protein_cc | chr1  | 90098631 | 90235462 | + | 11724 | 522.8425 | 0        | -0.61779 | 0.226131 | -2.73201 | 0.007455 | 0.041578 | 1 |
| ENSG0000 | mucosal h | Inflamed | CTD-2062f | lincRNA    | chr14 | 1.01E+08 | 1.01E+08 | + | 553   | 1.792363 | 0.513126 | 0.367784 | 0.134645 | 2.731505 | 0.007466 | 0.041628 | 1 |
| ENSG0000 | mucosal h | Inflamed | CTD-2324f | lincRNA    | chr5  | 6310554  | 6339997  | - | 2923  | 8.570406 | 0.162291 | 0.656799 | 0.240485 | 2.731142 | 0.007473 | 0.04166  | 1 |
| ENSG0000 | mucosal h | Inflamed | CYP51P1   | pseudoger  | chr3  | 82855666 | 82857172 | - | 1507  | 3.229117 | 0.326969 | 0.47954  | 0.175586 | 2.731082 | 0.007475 | 0.04166  | 1 |
| ENSG0000 | mucosal h | Inflamed | TSPAN9    | protein_cc | chr12 | 3186521  | 3395730  | + | 5714  | 1525.334 | 0        | -0.51199 | 0.187487 | -2.73081 | 0.00748  | 0.041668 | 1 |
| ENSG0000 | mucosal h | Inflamed | TMEM30B   | protein_cc | chr14 | 61744088 | 61748558 | - | 4471  | 4003.227 | 0        | 0.647713 | 0.237189 | 2.730791 | 0.007481 | 0.041668 | 1 |
| ENSG0000 | mucosal h | Inflamed | C19orf35  | protein_cc | chr19 | 2274631  | 2282181  | - | 2767  | 75.22196 | 0.002387 | -0.65259 | 0.238975 | -2.73079 | 0.007481 | 0.041668 | 1 |
| ENSG0000 | mucosal h | Inflamed | FAM201A   | antisense  | chr9  | 38620471 | 38624987 | + | 3847  | 91.12411 | 0.004773 | 0.65703  | 0.240607 | 2.730718 | 0.007482 | 0.041668 | 1 |
| ENSG0000 | mucosal h | Inflamed | UGT2B7    | protein_cc | chr4  | 69917081 | 69978705 | + | 2259  | 98.43198 | 0.016706 | 0.767895 | 0.281234 | 2.73045  | 0.007488 | 0.04169  | 1 |
| ENSG0000 | mucosal h | Inflamed | RP11-122C | lincRNA    | chr1  | 1.61E+08 | 1.61E+08 | + | 1807  | 142.6539 | 0.004773 | 0.589468 | 0.215896 | 2.730338 | 0.00749  | 0.041695 | 1 |
| ENSG0000 | mucosal h | Inflamed | AP000255  | lincRNA    | chr21 | 33108045 | 33108720 | + | 676   | 2.264916 | 0.405728 | 0.423989 | 0.155313 | 2.729897 | 0.0075   | 0.041738 | 1 |
| ENSG0000 | mucosal h | Inflamed | NT5DC3    | protein_cc | chr12 | 1.04E+08 | 1.04E+08 | - | 8722  | 575.5274 | 0        | 0.57057  | 0.209014 | 2.729814 | 0.007502 | 0.041739 | 1 |
| ENSG0000 | mucosal h | Inflamed | CHID1     | protein_cc | chr11 | 867357   | 915058   | - | 6265  | 1799.453 | 0        | -0.24159 | 0.088508 | -2.72956 | 0.007507 | 0.04176  | 1 |
| ENSG0000 | mucosal h | Inflamed | MOB3B     | protein_cc | chr9  | 27325207 | 27529779 | - | 7087  | 2426.031 | 0        | 0.46916  | 0.171904 | 2.729205 | 0.007514 | 0.041793 | 1 |
| ENSG0000 | mucosal h | Inflamed | TSPAN15   | protein_cc | chr10 | 71211229 | 71267425 | + | 2646  | 4009.695 | 0        | 0.306929 | 0.112489 | 2.728534 | 0.007529 | 0.041856 | 1 |
| ENSG0000 | mucosal h | Inflamed | C5orf63   | protein_cc | chr5  | 1.26E+08 | 1.26E+08 | - | 7190  | 214.4773 | 0        | 0.546169 | 0.200174 | 2.728469 | 0.00753  | 0.041856 | 1 |
| ENSG0000 | mucosal h | Inflamed | SDK1      | protein_cc | chr7  | 3341080  | 4308632  | + | 12045 | 1199.141 | 0        | -0.73227 | 0.268398 | -2.7283  | 0.007534 | 0.041856 | 1 |
| ENSG0000 | mucosal h | Inflamed | METTL10   | protein_cc | chr10 | 1.26E+08 | 1.26E+08 | - | 4225  | 200.222  | 0        | 0.335466 | 0.122961 | 2.728237 | 0.007535 | 0.041856 | 1 |
| ENSG0000 | mucosal h | Inflamed | RP11-426C | lincRNA    | chr16 | 29228491 | 29231352 | - | 2099  | 12.58711 | 0.279236 | -0.98305 | 0.360328 | -2.72822 | 0.007535 | 0.041856 | 1 |
| ENSG0000 | mucosal h | Inflamed | CXorf24   | protein_cc | chrX  | 47342970 | 47344207 | + | 1238  | 65.32458 | 0.011933 | 0.439611 | 0.161135 | 2.728213 | 0.007535 | 0.041856 | 1 |
| ENSG0000 | mucosal h | Inflamed | TPM4      | protein_cc | chr19 | 16177831 | 16213813 | + | 7412  | 20339.63 | 0        | -0.36335 | 0.133213 | -2.7276  | 0.007548 | 0.041919 | 1 |
| ENSG0000 | mucosal h | Inflamed | RP11-672L | lincRNA    | chr18 | 813275   | 813757   | + | 483   | 9.217184 | 0.059666 | 0.527716 | 0.193498 | 2.727244 | 0.007556 | 0.041952 | 1 |
| ENSG0000 | mucosal h | Inflamed | RP11-388C | sense_intr | chr17 | 80702944 | 80703585 | + | 642   | 19.07876 | 0.078759 | 0.670091 | 0.245708 | 2.72718  | 0.007557 | 0.041952 | 1 |
| ENSG0000 | mucosal h | Inflamed | MIR647    | miRNA      | chr20 | 62573984 | 62574079 | - | 96    | 15.87351 | 0.088305 | 0.661762 | 0.242667 | 2.72703  | 0.007561 | 0.04196  | 1 |
| ENSG0000 | mucosal h | Inflamed | HS3ST6    | protein_cc | chr16 | 1961464  | 1968441  | - | 1273  | 12.05012 | 0.544153 | 0.814145 | 0.298648 | 2.726102 | 0.00758  | 0.042061 | 1 |
| ENSG0000 | mucosal h | Inflamed | RHBDD3    | protein_cc | chr22 | 29655841 | 29664198 | - | 3014  | 806.3723 | 0        | -0.25036 | 0.091847 | -2.72582 | 0.007586 | 0.04208  | 1 |
| ENSG0000 | mucosal h | Inflamed | PCSK5     | protein_cc | chr9  | 78505560 | 78977255 | + | 12705 | 2087.747 | 0        | 0.691655 | 0.253744 | 2.725794 | 0.007587 | 0.04208  | 1 |

|          |           |          |           |            |       |          |          |   |       |          |          |          |          |          |          |          |   |
|----------|-----------|----------|-----------|------------|-------|----------|----------|---|-------|----------|----------|----------|----------|----------|----------|----------|---|
| ENSG0000 | mucosal h | Inflamed | COL4A5    | protein_cc | chrX  | 1.08E+08 | 1.08E+08 | + | 8738  | 925.6659 | 0        | 0.640105 | 0.234847 | 2.725625 | 0.007591 | 0.042091 | 1 |
| ENSG0000 | mucosal h | Inflamed | SPATS2    | protein_cc | chr12 | 49760367 | 49921205 | + | 6838  | 934.179  | 0        | -0.45261 | 0.166084 | -2.72521 | 0.007599 | 0.042132 | 1 |
| ENSG0000 | mucosal h | Inflamed | RP11-646E | lincRNA    | chr3  | 1.82E+08 | 1.82E+08 | + | 592   | 1.272076 | 0.687351 | 0.331571 | 0.121681 | 2.724908 | 0.007606 | 0.042158 | 1 |
| ENSG0000 | mucosal h | Inflamed | EGFR-AS1  | antisense  | chr7  | 55247443 | 55256627 | - | 2806  | 5.589499 | 0.50358  | 0.518543 | 0.190312 | 2.724706 | 0.00761  | 0.042174 | 1 |
| ENSG0000 | mucosal h | Inflamed | RP11-74C1 | pseudoger  | chr1  | 1.52E+08 | 1.52E+08 | + | 495   | 10.83294 | 0.026253 | 0.459892 | 0.168812 | 2.724289 | 0.007619 | 0.042214 | 1 |
| ENSG0000 | mucosal h | Inflamed | LRR7      | protein_cc | chr1  | 70034081 | 70617628 | + | 14652 | 16.53222 | 0.155131 | 0.919093 | 0.337419 | 2.723895 | 0.007628 | 0.042252 | 1 |
| ENSG0000 | mucosal h | Inflamed | ANGPTL1   | protein_cc | chr1  | 1.79E+08 | 1.79E+08 | - | 3403  | 97.50835 | 0.009547 | 0.98833  | 0.362873 | 2.723625 | 0.007633 | 0.042275 | 1 |
| ENSG0000 | mucosal h | Inflamed | FCGBP     | protein_cc | chr19 | 40353963 | 40440533 | - | 16564 | 184371.1 | 0        | 0.968921 | 0.355767 | 2.72347  | 0.007637 | 0.042282 | 1 |
| ENSG0000 | mucosal h | Inflamed | RP11-415F | antisense  | chr3  | 16355946 | 16356494 | + | 549   | 11.47733 | 0.071599 | 0.634516 | 0.232985 | 2.723418 | 0.007638 | 0.042282 | 1 |
| ENSG0000 | mucosal h | Inflamed | CRB2      | protein_cc | chr9  | 1.26E+08 | 1.26E+08 | + | 6349  | 252.568  | 0        | 0.667941 | 0.245284 | 2.723135 | 0.007644 | 0.0423   | 1 |
| ENSG0000 | mucosal h | Inflamed | RN7SL706l | misc_RNA   | chr14 | 68616337 | 68616625 | - | 289   | 0.947494 | 0.789976 | 0.338824 | 0.124429 | 2.72303  | 0.007646 | 0.0423   | 1 |
| ENSG0000 | mucosal h | Inflamed | C17orf49  | protein_cc | chr17 | 6917814  | 6920844  | + | 2628  | 260.6134 | 0        | -0.28004 | 0.102842 | -2.72297 | 0.007647 | 0.0423   | 1 |
| ENSG0000 | mucosal h | Inflamed | IRF5      | protein_cc | chr7  | 1.29E+08 | 1.29E+08 | + | 4375  | 729.3962 | 0        | -0.37457 | 0.137559 | -2.72297 | 0.007647 | 0.0423   | 1 |
| ENSG0000 | mucosal h | Inflamed | CTD-2382f | antisense  | chr15 | 42264961 | 42291292 | + | 2499  | 1.319809 | 0.639618 | 0.308061 | 0.113172 | 2.722073 | 0.007667 | 0.042398 | 1 |
| ENSG0000 | mucosal h | Inflamed | SLC7A3    | protein_cc | chrX  | 70145432 | 70150975 | - | 2265  | 4.756563 | 0.24821  | 0.606091 | 0.222699 | 2.721567 | 0.007678 | 0.042449 | 1 |
| ENSG0000 | mucosal h | Inflamed | NDNF      | protein_cc | chr4  | 1.22E+08 | 1.22E+08 | - | 3556  | 339.6086 | 0.002387 | 0.667162 | 0.245149 | 2.721453 | 0.00768  | 0.042454 | 1 |
| ENSG0000 | mucosal h | Inflamed | HOOK2     | protein_cc | chr19 | 12873817 | 12983554 | - | 5950  | 2355.437 | 0        | 0.39534  | 0.145282 | 2.721201 | 0.007686 | 0.042475 | 1 |
| ENSG0000 | mucosal h | Inflamed | RP11-218C | lincRNA    | chr20 | 23612463 | 23612953 | - | 491   | 11.61337 | 0.040573 | 0.478545 | 0.175884 | 2.720803 | 0.007694 | 0.042499 | 1 |
| ENSG0000 | mucosal h | Inflamed | RP1-60O1f | lincRNA    | chr6  | 1.07E+08 | 1.07E+08 | - | 6610  | 23.17422 | 0.050119 | 0.749182 | 0.275354 | 2.720799 | 0.007694 | 0.042499 | 1 |
| ENSG0000 | mucosal h | Inflamed | RSPH3     | protein_cc | chr6  | 1.59E+08 | 1.59E+08 | - | 6561  | 731.2243 | 0        | 0.345805 | 0.127098 | 2.720776 | 0.007695 | 0.042499 | 1 |
| ENSG0000 | mucosal h | Inflamed | NLRP14    | protein_cc | chr11 | 7041677  | 7092539  | + | 3628  | 6.940334 | 0.176611 | -0.62863 | 0.231066 | -2.72056 | 0.007699 | 0.042515 | 1 |
| ENSG0000 | mucosal h | Inflamed | RP11-792I | lincRNA    | chr4  | 79567057 | 79603853 | + | 2951  | 26.78759 | 0.00716  | -0.56211 | 0.206637 | -2.72031 | 0.007705 | 0.042537 | 1 |
| ENSG0000 | mucosal h | Inflamed | ELAVL2    | protein_cc | chr9  | 23690102 | 23826335 | - | 5140  | 9.093079 | 0.252983 | 0.717056 | 0.263643 | 2.719796 | 0.007716 | 0.042586 | 1 |
| ENSG0000 | mucosal h | Inflamed | CTD-2089f | lincRNA    | chr5  | 50265051 | 50266001 | - | 606   | 1.145585 | 0.735084 | 0.427535 | 0.157196 | 2.719751 | 0.007717 | 0.042586 | 1 |
| ENSG0000 | mucosal h | Inflamed | STAT5A    | protein_cc | chr17 | 40439565 | 40463961 | + | 5756  | 2245.952 | 0        | -0.37029 | 0.136163 | -2.71945 | 0.007723 | 0.042612 | 1 |
| ENSG0000 | mucosal h | Inflamed | IGFBP7-AS | antisense  | chr4  | 57975928 | 58071676 | + | 1740  | 9.873508 | 0.062053 | -0.59303 | 0.218076 | -2.71938 | 0.007725 | 0.042612 | 1 |
| ENSG0000 | mucosal h | Inflamed | DDR1      | protein_cc | chr6  | 30844198 | 30867933 | + | 9122  | 13905.37 | 0        | 0.47487  | 0.17463  | 2.719295 | 0.007727 | 0.042613 | 1 |
| ENSG0000 | mucosal h | Inflamed | UBXN10    | protein_cc | chr1  | 20512578 | 20522541 | + | 5571  | 460.2172 | 0        | 0.562788 | 0.206995 | 2.718854 | 0.007736 | 0.042657 | 1 |
| ENSG0000 | mucosal h | Inflamed | AC104600  | pseudoger  | chr2  | 1.97E+08 | 1.97E+08 | - | 1422  | 3.49642  | 0.346062 | 0.514265 | 0.189187 | 2.718294 | 0.007749 | 0.042716 | 1 |
| ENSG0000 | mucosal h | Inflamed | FAM85B    | antisense  | chr8  | 8025341  | 8084136  | - | 792   | 2.582339 | 0.329356 | 0.37934  | 0.139579 | 2.71775  | 0.00776  | 0.042772 | 1 |
| ENSG0000 | mucosal h | Inflamed | IL18BP    | protein_cc | chr11 | 71709587 | 71716761 | + | 4323  | 1142.332 | 0        | -0.33979 | 0.12504  | -2.71747 | 0.007767 | 0.042796 | 1 |
| ENSG0000 | mucosal h | Inflamed | GS1-393G  | antisense  | chr8  | 1.46E+08 | 1.46E+08 | - | 444   | 152.0501 | 0        | 0.465009 | 0.171125 | 2.717363 | 0.007769 | 0.0428   | 1 |
| ENSG0000 | mucosal h | Inflamed | SENP8     | protein_cc | chr15 | 72406599 | 72433311 | + | 2289  | 68.29117 | 0        | 0.438862 | 0.161526 | 2.716979 | 0.007777 | 0.042838 | 1 |
| ENSG0000 | mucosal h | Inflamed | RP13-216E | lincRNA    | chrX  | 73168808 | 73169393 | + | 451   | 9.687351 | 0.081146 | 0.558294 | 0.205496 | 2.716805 | 0.007781 | 0.042844 | 1 |
| ENSG0000 | mucosal h | Inflamed | KIAA0556  | protein_cc | chr16 | 27561454 | 27791690 | + | 9692  | 1904.871 | 0        | 0.332813 | 0.122503 | 2.716777 | 0.007782 | 0.042844 | 1 |
| ENSG0000 | mucosal h | Inflamed | ERLIN2    | protein_cc | chr8  | 37594117 | 37616619 | + | 9464  | 2059.124 | 0        | 0.442174 | 0.162788 | 2.716263 | 0.007793 | 0.042895 | 1 |
| ENSG0000 | mucosal h | Inflamed | PACIN1    | protein_cc | chr6  | 34433916 | 34503006 | + | 4712  | 51.01909 | 0.011933 | -0.71804 | 0.264359 | -2.71615 | 0.007795 | 0.042895 | 1 |
| ENSG0000 | mucosal h | Inflamed | RPS2P32   | pseudoger  | chr7  | 23530092 | 23530983 | + | 892   | 11.19809 | 0.023866 | -0.5872  | 0.216191 | -2.7161  | 0.007796 | 0.042895 | 1 |
| ENSG0000 | mucosal h | Inflamed | F2RL3     | protein_cc | chr19 | 16999671 | 17003417 | + | 3473  | 366.148  | 0        | -0.61486 | 0.226385 | -2.716   | 0.007799 | 0.042895 | 1 |
| ENSG0000 | mucosal h | Inflamed | CTA-126B4 | lincRNA    | chr22 | 42834029 | 42842201 | + | 572   | 8.873508 | 0.183771 | -0.62081 | 0.228575 | -2.71598 | 0.007799 | 0.042895 | 1 |

|          |           |          |           |                  |          |          |   |       |          |          |          |          |          |          |          |   |
|----------|-----------|----------|-----------|------------------|----------|----------|---|-------|----------|----------|----------|----------|----------|----------|----------|---|
| ENSG0000 | mucosal h | Inflamed | INHBE     | protein_cc chr12 | 57846106 | 57853063 | + | 3015  | 4.968974 | 0.315036 | -0.67009 | 0.246739 | -2.71577 | 0.007804 | 0.042909 | 1 |
| ENSG0000 | mucosal h | Inflamed | CD9       | protein_cc chr12 | 6308881  | 6347425  | + | 3218  | 10377.51 | 0        | 0.383391 | 0.141179 | 2.715643 | 0.007806 | 0.042909 | 1 |
| ENSG0000 | mucosal h | Inflamed | AC023590  | protein_cc chr8  | 1.19E+08 | 1.19E+08 | + | 1617  | 8.193317 | 0.293556 | -0.81661 | 0.300704 | -2.71564 | 0.007807 | 0.042909 | 1 |
| ENSG0000 | mucosal h | Inflamed | C21orf33  | protein_cc chr21 | 45553487 | 45565605 | + | 3108  | 2987.403 | 0        | 0.219376 | 0.08079  | 2.71539  | 0.007812 | 0.04293  | 1 |
| ENSG0000 | mucosal h | Inflamed | RP11-474I | antisense chr1   | 1.62E+08 | 1.62E+08 | - | 575   | 0.852029 | 0.794749 | -0.31538 | 0.116153 | -2.71526 | 0.007815 | 0.042937 | 1 |
| ENSG0000 | mucosal h | Inflamed | HIGD1A    | protein_cc chr3  | 42798669 | 42846023 | - | 1940  | 5513.659 | 0        | 0.474307 | 0.174717 | 2.714717 | 0.007827 | 0.042993 | 1 |
| ENSG0000 | mucosal h | Inflamed | RP11-296C | pseudoger chr1   | 1.73E+08 | 1.73E+08 | - | 1337  | 0.921241 | 0.782816 | 0.336957 | 0.124126 | 2.714634 | 0.007829 | 0.042994 | 1 |
| ENSG0000 | mucosal h | Inflamed | ANKHD1-E  | protein_cc chr5  | 1.4E+08  | 1.4E+08  | + | 11385 | 126.9833 | 0.002387 | 0.542645 | 0.199917 | 2.714356 | 0.007835 | 0.043017 | 1 |
| ENSG0000 | mucosal h | Inflamed | NRIP2     | protein_cc chr12 | 2934514  | 2944710  | - | 2803  | 151.8616 | 0.004773 | -0.65968 | 0.243039 | -2.7143  | 0.007836 | 0.043017 | 1 |
| ENSG0000 | mucosal h | Inflamed | SNX22     | protein_cc chr15 | 64443914 | 64449680 | + | 5767  | 164.8186 | 0.002387 | -0.9032  | 0.332776 | -2.71415 | 0.007839 | 0.043025 | 1 |
| ENSG0000 | mucosal h | Inflamed | GPRIN1    | protein_cc chr5  | 1.76E+08 | 1.76E+08 | - | 4211  | 167.4415 | 0.002387 | -0.52376 | 0.192978 | -2.71408 | 0.007841 | 0.043025 | 1 |
| ENSG0000 | mucosal h | Inflamed | ZNF112    | protein_cc chr19 | 44830708 | 44871377 | - | 3848  | 92.47733 | 0.009547 | 0.638087 | 0.235156 | 2.713462 | 0.007854 | 0.043091 | 1 |
| ENSG0000 | mucosal h | Inflamed | ODAM      | protein_cc chr4  | 71062213 | 71070293 | + | 1562  | 7.026253 | 0.331742 | -0.78821 | 0.290528 | -2.71302 | 0.007864 | 0.043136 | 1 |
| ENSG0000 | mucosal h | Inflamed | MAGI3     | protein_cc chr1  | 1.14E+08 | 1.14E+08 | + | 8180  | 1450.095 | 0        | 0.613477 | 0.226134 | 2.712895 | 0.007867 | 0.043138 | 1 |
| ENSG0000 | mucosal h | Inflamed | MAGED2    | protein_cc chrX  | 54834032 | 54842445 | + | 2914  | 3286.458 | 0        | -0.27523 | 0.101453 | -2.71285 | 0.007868 | 0.043138 | 1 |
| ENSG0000 | mucosal h | Inflamed | PDE10A    | protein_cc chr6  | 1.66E+08 | 1.66E+08 | - | 10384 | 121.0119 | 0.019093 | -0.82626 | 0.304593 | -2.71268 | 0.007872 | 0.043142 | 1 |
| ENSG0000 | mucosal h | Inflamed | GNS       | protein_cc chr12 | 65107225 | 65153227 | - | 6284  | 6386.177 | 0        | -0.36863 | 0.135894 | -2.71267 | 0.007872 | 0.043142 | 1 |
| ENSG0000 | mucosal h | Inflamed | BECN1     | protein_cc chr17 | 40962152 | 40985367 | - | 5141  | 3132.375 | 0        | 0.319091 | 0.117655 | 2.712093 | 0.007885 | 0.043191 | 1 |
| ENSG0000 | mucosal h | Inflamed | CTA-363E  | lincRNA chr16    | 19354969 | 19413015 | - | 2278  | 38.63484 | 0.023866 | 0.745176 | 0.274761 | 2.712085 | 0.007885 | 0.043191 | 1 |
| ENSG0000 | mucosal h | Inflamed | AC008984  | pseudoger chr19  | 54813047 | 54817309 | - | 404   | 2.515513 | 0.682578 | -0.6546  | 0.24137  | -2.71204 | 0.007886 | 0.043191 | 1 |
| ENSG0000 | mucosal h | Inflamed | TMEM177   | protein_cc chr2  | 1.2E+08  | 1.2E+08  | + | 2588  | 417.0525 | 0        | 0.277539 | 0.102342 | 2.711867 | 0.00789  | 0.043203 | 1 |
| ENSG0000 | mucosal h | Inflamed | AC002480  | sense_ove chr7   | 22611226 | 22701411 | - | 1282  | 10.22434 | 0.291169 | -0.79455 | 0.293002 | -2.71177 | 0.007892 | 0.043206 | 1 |
| ENSG0000 | mucosal h | Inflamed | RP1-125I3 | antisense chr1   | 26186104 | 26189911 | + | 849   | 3.591885 | 0.236277 | -0.43244 | 0.159478 | -2.71162 | 0.007895 | 0.043216 | 1 |
| ENSG0000 | mucosal h | Inflamed | ZNF784    | protein_cc chr19 | 56132108 | 56135967 | - | 2058  | 400.5322 | 0        | 0.242052 | 0.08927  | 2.711448 | 0.007899 | 0.043227 | 1 |
| ENSG0000 | mucosal h | Inflamed | GBAS      | protein_cc chr7  | 56019486 | 56067874 | + | 5651  | 1190.757 | 0        | 0.418589 | 0.154387 | 2.711298 | 0.007902 | 0.043235 | 1 |
| ENSG0000 | mucosal h | Inflamed | ZNF717    | protein_cc chr3  | 75758794 | 75834734 | - | 6917  | 165.5943 | 0        | 0.432664 | 0.159582 | 2.711235 | 0.007904 | 0.043235 | 1 |
| ENSG0000 | mucosal h | Inflamed | RP11-382M | pseudoger chr11  | 1.07E+08 | 1.07E+08 | + | 1245  | 2.116945 | 0.5179   | -0.42522 | 0.156845 | -2.71107 | 0.007907 | 0.043246 | 1 |
| ENSG0000 | mucosal h | Inflamed | DHRS4     | protein_cc chr14 | 24422795 | 24438488 | + | 2305  | 688.5943 | 0        | 0.231501 | 0.085395 | 2.710939 | 0.00791  | 0.043253 | 1 |
| ENSG0000 | mucosal h | Inflamed | ZBTB7B    | protein_cc chr1  | 1.55E+08 | 1.55E+08 | + | 4243  | 10001.71 | 0        | 0.361967 | 0.133525 | 2.710851 | 0.007912 | 0.043254 | 1 |
| ENSG0000 | mucosal h | Inflamed | MIR4458H  | lincRNA chr5     | 8450856  | 8463208  | + | 4339  | 136.136  | 0        | 0.510777 | 0.188477 | 2.710029 | 0.00793  | 0.043345 | 1 |
| ENSG0000 | mucosal h | Inflamed | TIMP4     | protein_cc chr3  | 12194551 | 12200851 | - | 1650  | 95.7494  | 0        | 0.597245 | 0.220405 | 2.709762 | 0.007936 | 0.043367 | 1 |
| ENSG0000 | mucosal h | Inflamed | IGHV3-52  | IG_V_pseu chr14  | 1.07E+08 | 1.07E+08 | - | 353   | 5.906921 | 0.334129 | -0.70599 | 0.260541 | -2.7097  | 0.007938 | 0.043367 | 1 |
| ENSG0000 | mucosal h | Inflamed | HLA-DPA3  | pseudoger chr6   | 33098993 | 33111102 | - | 229   | 2.742243 | 0.541766 | -0.59897 | 0.221067 | -2.70945 | 0.007943 | 0.043389 | 1 |
| ENSG0000 | mucosal h | Inflamed | CTC-479C  | protein_cc chr16 | 67963517 | 67969920 | - | 5685  | 333.8091 | 0        | -0.32481 | 0.119903 | -2.70898 | 0.007954 | 0.043427 | 1 |
| ENSG0000 | mucosal h | Inflamed | RP11-815J | antisense chr15  | 86122277 | 86123409 | - | 953   | 6.004773 | 0.131265 | 0.542715 | 0.200339 | 2.708982 | 0.007954 | 0.043427 | 1 |
| ENSG0000 | mucosal h | Inflamed | NHEJ1     | protein_cc chr2  | 2.2E+08  | 2.2E+08  | - | 3109  | 30.37947 | 0.016706 | 0.367915 | 0.135817 | 2.708913 | 0.007955 | 0.043427 | 1 |
| ENSG0000 | mucosal h | Inflamed | DPAGT1    | protein_cc chr11 | 1.19E+08 | 1.19E+08 | - | 5280  | 2005.189 | 0        | -0.27696 | 0.102266 | -2.7082  | 0.007971 | 0.043505 | 1 |
| ENSG0000 | mucosal h | Inflamed | VCP       | protein_cc chr9  | 35056061 | 35073246 | - | 5438  | 13617.9  | 0        | -0.31362 | 0.115811 | -2.70806 | 0.007974 | 0.043512 | 1 |
| ENSG0000 | mucosal h | Inflamed | SLC12A4   | protein_cc chr16 | 67977377 | 68003504 | - | 8298  | 1411.449 | 0        | -0.51895 | 0.191667 | -2.70757 | 0.007985 | 0.043563 | 1 |
| ENSG0000 | mucosal h | Inflamed | SPOCK2    | protein_cc chr10 | 73818793 | 73848790 | - | 6572  | 3082.723 | 0        | -0.67987 | 0.25112  | -2.70733 | 0.007991 | 0.043583 | 1 |

|          |           |          |           |            |       |          |          |   |       |          |          |          |          |          |          |          |   |
|----------|-----------|----------|-----------|------------|-------|----------|----------|---|-------|----------|----------|----------|----------|----------|----------|----------|---|
| ENSG0000 | mucosal h | Inflamed | RP11-84C1 | pseudoger  | chr14 | 21451314 | 21453225 | - | 578   | 2.9642   | 0.460621 | 0.401471 | 0.148305 | 2.70707  | 0.007996 | 0.043606 | 1 |
| ENSG0000 | mucosal h | Inflamed | AP003774  | antisense  | chr11 | 64092522 | 64096976 | - | 672   | 83.24821 | 0.002387 | 0.63176  | 0.233421 | 2.706523 | 0.008009 | 0.043664 | 1 |
| ENSG0000 | mucosal h | Inflamed | RP11-84D1 | antisense  | chr1  | 25287836 | 25289588 | + | 820   | 10.35084 | 0.081146 | -0.62396 | 0.230647 | -2.70526 | 0.008037 | 0.04381  | 1 |
| ENSG0000 | mucosal h | Inflamed | SNORD123  | snoRNA     | chr5  | 9548948  | 9549017  | + | 70    | 4.379475 | 0.257757 | 0.535331 | 0.197924 | 2.704728 | 0.008049 | 0.04386  | 1 |
| ENSG0000 | mucosal h | Inflamed | PTGER4    | protein_cc | chr5  | 40679600 | 40693837 | + | 3961  | 1774.086 | 0        | 0.379385 | 0.140274 | 2.704606 | 0.008052 | 0.04386  | 1 |
| ENSG0000 | mucosal h | Inflamed | ZNF607    | protein_cc | chr19 | 38187264 | 38210691 | - | 4740  | 188.0453 | 0        | 0.51481  | 0.190349 | 2.704566 | 0.008053 | 0.04386  | 1 |
| ENSG0000 | mucosal h | Inflamed | ZNF250    | protein_cc | chr8  | 1.46E+08 | 1.46E+08 | - | 8711  | 239.3771 | 0        | 0.405127 | 0.149794 | 2.704555 | 0.008053 | 0.04386  | 1 |
| ENSG0000 | mucosal h | Inflamed | AC004951  | lincRNA    | chr7  | 44043645 | 44047465 | - | 1866  | 30.358   | 0.009547 | 0.491104 | 0.181592 | 2.704433 | 0.008056 | 0.043866 | 1 |
| ENSG0000 | mucosal h | Inflamed | RP11-21L1 | antisense  | chr11 | 14284392 | 14295237 | - | 240   | 2.451074 | 0.448687 | 0.472044 | 0.174555 | 2.704276 | 0.008059 | 0.043876 | 1 |
| ENSG0000 | mucosal h | Inflamed | TKTL1     | protein_cc | chrX  | 1.54E+08 | 1.54E+08 | + | 3650  | 7.195704 | 0.176611 | -0.65299 | 0.241478 | -2.70415 | 0.008062 | 0.043883 | 1 |
| ENSG0000 | mucosal h | Inflamed | ADCK3     | protein_cc | chr1  | 2.27E+08 | 2.27E+08 | + | 7797  | 2427.317 | 0        | 0.346249 | 0.128068 | 2.703643 | 0.008073 | 0.043935 | 1 |
| ENSG0000 | mucosal h | Inflamed | NAT8      | protein_cc | chr2  | 73867959 | 73869520 | - | 947   | 7.494033 | 0.615752 | 0.543521 | 0.201112 | 2.70258  | 0.008098 | 0.044057 | 1 |
| ENSG0000 | mucosal h | Inflamed | ZNF793    | protein_cc | chr19 | 37997841 | 38039664 | + | 12007 | 135.1742 | 0.004773 | 0.773884 | 0.286409 | 2.702025 | 0.00811  | 0.0441   | 1 |
| ENSG0000 | mucosal h | Inflamed | AC024560  | lincRNA    | chr3  | 1.97E+08 | 1.97E+08 | - | 1471  | 9.902148 | 0.310263 | 0.614774 | 0.227524 | 2.702019 | 0.00811  | 0.0441   | 1 |
| ENSG0000 | mucosal h | Inflamed | IGKV6D-41 | IG_V_gene  | chr2  | 90108504 | 90109080 | + | 371   | 11.75179 | 0.608592 | -0.82033 | 0.3036   | -2.70201 | 0.00811  | 0.0441   | 1 |
| ENSG0000 | mucosal h | Inflamed | RP11-47L3 | lincRNA    | chr17 | 33640521 | 33651919 | + | 714   | 16.04057 | 0.009547 | -0.46096 | 0.170617 | -2.70172 | 0.008117 | 0.044126 | 1 |
| ENSG0000 | mucosal h | Inflamed | ADAM22    | protein_cc | chr7  | 87563458 | 87832204 | + | 12217 | 87.69451 | 0.00716  | 0.710317 | 0.26292  | 2.701648 | 0.008119 | 0.044126 | 1 |
| ENSG0000 | mucosal h | Inflamed | TSPAN33   | protein_cc | chr7  | 1.29E+08 | 1.29E+08 | + | 2496  | 893.1551 | 0        | -0.35678 | 0.132063 | -2.70156 | 0.008121 | 0.044128 | 1 |
| ENSG0000 | mucosal h | Inflamed | MMP8      | protein_cc | chr11 | 1.03E+08 | 1.03E+08 | - | 3438  | 8.183771 | 0.534606 | -1.04346 | 0.38629  | -2.70123 | 0.008128 | 0.04416  | 1 |
| ENSG0000 | mucosal h | Inflamed | SULF1     | protein_cc | chr8  | 70378859 | 70573150 | + | 9404  | 1649.8   | 0        | -0.67746 | 0.250811 | -2.70108 | 0.008132 | 0.044169 | 1 |
| ENSG0000 | mucosal h | Inflamed | LOXL1     | protein_cc | chr15 | 74218330 | 74244478 | + | 3637  | 927.7327 | 0        | -0.72235 | 0.267442 | -2.70096 | 0.008134 | 0.044175 | 1 |
| ENSG0000 | mucosal h | Inflamed | RP11-6981 | sense_ove  | chr11 | 35835882 | 35839557 | + | 3676  | 74.97136 | 0.016706 | 0.812534 | 0.300938 | 2.700001 | 0.008156 | 0.044284 | 1 |
| ENSG0000 | mucosal h | Inflamed | CTA-250D  | lincRNA    | chr22 | 42318027 | 42319104 | - | 1078  | 182.568  | 0.002387 | -0.92077 | 0.341048 | -2.69982 | 0.00816  | 0.044293 | 1 |
| ENSG0000 | mucosal h | Inflamed | RP4-803J1 | antisense  | chr1  | 2.29E+08 | 2.29E+08 | + | 640   | 5.856802 | 0.205251 | 0.563302 | 0.208647 | 2.69978  | 0.008161 | 0.044293 | 1 |
| ENSG0000 | mucosal h | Inflamed | C6orf165  | protein_cc | chr6  | 88117730 | 88221352 | + | 3530  | 12.07399 | 0.126492 | 0.740672 | 0.274397 | 2.699269 | 0.008173 | 0.044348 | 1 |
| ENSG0000 | mucosal h | Inflamed | RP11-542k | antisense  | chr9  | 1.25E+08 | 1.25E+08 | + | 259   | 2.582339 | 0.548926 | -0.55794 | 0.206746 | -2.69867 | 0.008186 | 0.044412 | 1 |
| ENSG0000 | mucosal h | Inflamed | AC093616  | pseudoger  | chr2  | 88000503 | 88038766 | + | 2328  | 21.93795 | 0.019093 | -0.61118 | 0.226485 | -2.69857 | 0.008189 | 0.044417 | 1 |
| ENSG0000 | mucosal h | Inflamed | C10orf54  | protein_cc | chr10 | 73507316 | 73533255 | - | 5128  | 6179.597 | 0        | -0.38588 | 0.143004 | -2.69836 | 0.008194 | 0.044432 | 1 |
| ENSG0000 | mucosal h | Inflamed | RP4-725G  | pseudoger  | chr7  | 56230838 | 56231226 | + | 389   | 2.909308 | 0.369928 | -0.47876 | 0.177452 | -2.69799 | 0.008202 | 0.04447  | 1 |
| ENSG0000 | mucosal h | Inflamed | ZNF823    | protein_cc | chr19 | 11832080 | 11849824 | - | 2459  | 269.1098 | 0        | 0.574725 | 0.213033 | 2.69782  | 0.008206 | 0.044482 | 1 |
| ENSG0000 | mucosal h | Inflamed | PPP1R13B  | protein_cc | chr14 | 1.04E+08 | 1.04E+08 | - | 9031  | 2541.487 | 0        | 0.397605 | 0.147428 | 2.69694  | 0.008226 | 0.044582 | 1 |
| ENSG0000 | mucosal h | Inflamed | RP11-458l | lincRNA    | chr1  | 1.45E+08 | 1.45E+08 | - | 2454  | 16.60143 | 0.033413 | 0.570417 | 0.211514 | 2.696826 | 0.008229 | 0.044586 | 1 |
| ENSG0000 | mucosal h | Inflamed | PI4KAP2   | pseudoger  | chr22 | 21827289 | 21871822 | - | 7474  | 440.389  | 0        | 0.398373 | 0.147723 | 2.69676  | 0.00823  | 0.044586 | 1 |
| ENSG0000 | mucosal h | Inflamed | RP13-131k | antisense  | chr3  | 49022482 | 49027421 | - | 782   | 11.64916 | 0.038186 | 0.436909 | 0.162021 | 2.696619 | 0.008234 | 0.044594 | 1 |
| ENSG0000 | mucosal h | Inflamed | MPP7      | protein_cc | chr10 | 28339922 | 28623415 | - | 6577  | 605.5346 | 0        | 0.644912 | 0.239179 | 2.696354 | 0.00824  | 0.044618 | 1 |
| ENSG0000 | mucosal h | Inflamed | SYT13     | protein_cc | chr11 | 45261852 | 45307870 | - | 5424  | 2066.952 | 0        | 0.646835 | 0.239905 | 2.696206 | 0.008243 | 0.044627 | 1 |
| ENSG0000 | mucosal h | Inflamed | SORBS2    | protein_cc | chr4  | 1.87E+08 | 1.87E+08 | - | 16730 | 540.2506 | 0        | 0.48701  | 0.180647 | 2.695923 | 0.00825  | 0.044654 | 1 |
| ENSG0000 | mucosal h | Inflamed | CTD-3064l | antisense  | chr19 | 38036372 | 38040073 | - | 3267  | 2.983294 | 0.431981 | 0.439749 | 0.163177 | 2.694927 | 0.008273 | 0.044769 | 1 |
| ENSG0000 | mucosal h | Inflamed | C1orf228  | protein_cc | chr1  | 45140364 | 45191263 | + | 3166  | 90.80191 | 0        | -0.66918 | 0.248338 | -2.69464 | 0.008279 | 0.044796 | 1 |
| ENSG0000 | mucosal h | Inflamed | AZGP1     | protein_cc | chr7  | 99564343 | 99573780 | - | 2699  | 600.2124 | 0.004773 | -0.93814 | 0.348179 | -2.69442 | 0.008284 | 0.044814 | 1 |

|          |           |          |           |                |       |          |          |   |      |          |          |          |          |          |          |          |   |
|----------|-----------|----------|-----------|----------------|-------|----------|----------|---|------|----------|----------|----------|----------|----------|----------|----------|---|
| ENSG0000 | mucosal h | Inflamed | ZNF169    | protein_cc     | chr9  | 97021593 | 97063736 | + | 5518 | 243.2888 | 0.002387 | 0.617554 | 0.229232 | 2.694012 | 0.008294 | 0.044856 | 1 |
| ENSG0000 | mucosal h | Inflamed | RHOQ      | protein_cc     | chr2  | 46768945 | 46810260 | + | 4619 | 1328.525 | 0        | -0.62327 | 0.231384 | -2.69365 | 0.008302 | 0.044892 | 1 |
| ENSG0000 | mucosal h | Inflamed | AC012307  | processed_chr2 |       | 96874154 | 96908359 | + | 2285 | 148.5585 | 0        | 0.211687 | 0.07859  | 2.693543 | 0.008305 | 0.044896 | 1 |
| ENSG0000 | mucosal h | Inflamed | SHCBP1    | protein_cc     | chr16 | 46614466 | 46655538 | - | 4459 | 225.9594 | 0        | -0.64205 | 0.238396 | -2.69319 | 0.008313 | 0.044931 | 1 |
| ENSG0000 | mucosal h | Inflamed | DHDDS     | protein_cc     | chr1  | 26758773 | 26797785 | + | 5596 | 3437.024 | 0        | 0.299332 | 0.111155 | 2.692912 | 0.008319 | 0.044941 | 1 |
| ENSG0000 | mucosal h | Inflamed | MEP1AP4   | pseudoger      | chr9  | 44147906 | 44154014 | + | 1087 | 8.102625 | 0.281623 | 0.65495  | 0.243214 | 2.692892 | 0.00832  | 0.044941 | 1 |
| ENSG0000 | mucosal h | Inflamed | NUDT19    | protein_cc     | chr19 | 33182867 | 33204702 | + | 2967 | 764.6444 | 0        | 0.315563 | 0.117186 | 2.692838 | 0.008321 | 0.044941 | 1 |
| ENSG0000 | mucosal h | Inflamed | RNU6-113  | snRNA          | chr7  | 1.02E+08 | 1.02E+08 | + | 104  | 0.816229 | 0.785203 | 0.300271 | 0.111509 | 2.692796 | 0.008322 | 0.044941 | 1 |
| ENSG0000 | mucosal h | Inflamed | AC096574  | processed_chr2 |       | 2.39E+08 | 2.39E+08 | + | 3890 | 2.46778  | 0.434368 | 0.467076 | 0.173461 | 2.69268  | 0.008325 | 0.044941 | 1 |
| ENSG0000 | mucosal h | Inflamed | RP1-102E2 | lincRNA        | chr12 | 6503071  | 6504235  | + | 724  | 28.93317 | 0.02864  | 0.5863   | 0.21774  | 2.692665 | 0.008325 | 0.044941 | 1 |
| ENSG0000 | mucosal h | Inflamed | PFN2      | protein_cc     | chr3  | 1.5E+08  | 1.5E+08  | - | 3440 | 697.6897 | 0        | 0.414613 | 0.153986 | 2.692541 | 0.008328 | 0.044948 | 1 |
| ENSG0000 | mucosal h | Inflamed | RP11-5061 | pseudoger      | chr5  | 54652136 | 54653351 | - | 1216 | 1.286396 | 0.692124 | 0.385033 | 0.143026 | 2.692046 | 0.008339 | 0.045    | 1 |
| ENSG0000 | mucosal h | Inflamed | RP11-1531 | pseudoger      | chr4  | 1.55E+08 | 1.55E+08 | + | 3277 | 11.78759 | 0.317422 | -0.92856 | 0.344937 | -2.69196 | 0.008341 | 0.045002 | 1 |
| ENSG0000 | mucosal h | Inflamed | MANEA     | protein_cc     | chr6  | 96025419 | 96057333 | + | 5187 | 400.2243 | 0        | -0.62218 | 0.231139 | -2.69182 | 0.008345 | 0.04501  | 1 |
| ENSG0000 | mucosal h | Inflamed | IGHV1-67  | IG_V_pseu      | chr14 | 1.07E+08 | 1.07E+08 | - | 357  | 1.150358 | 0.778043 | -0.45074 | 0.16749  | -2.69112 | 0.008361 | 0.04509  | 1 |
| ENSG0000 | mucosal h | Inflamed | MYOZ1     | protein_cc     | chr10 | 75391412 | 75401515 | - | 1541 | 3.553699 | 0.26969  | -0.44488 | 0.165322 | -2.69102 | 0.008363 | 0.045093 | 1 |
| ENSG0000 | mucosal h | Inflamed | ARHGAP4   | protein_cc     | chr20 | 37230577 | 37279678 | + | 3195 | 2.066826 | 0.75179  | -0.60843 | 0.226104 | -2.69093 | 0.008365 | 0.045094 | 1 |
| ENSG0000 | mucosal h | Inflamed | RP11-46C2 | antisense      | chr16 | 89281638 | 89284061 | - | 2424 | 104.0167 | 0.002387 | 0.438639 | 0.163041 | 2.69036  | 0.008379 | 0.045157 | 1 |
| ENSG0000 | mucosal h | Inflamed | IGLV2-34  | IG_V_pseu      | chr22 | 22922478 | 22922760 | + | 283  | 1.930788 | 0.634845 | -0.53034 | 0.197143 | -2.69015 | 0.008384 | 0.045175 | 1 |
| ENSG0000 | mucosal h | Inflamed | PRIMPOL   | protein_cc     | chr4  | 1.86E+08 | 1.86E+08 | + | 2843 | 287.3484 | 0        | 0.411473 | 0.152965 | 2.689976 | 0.008388 | 0.045187 | 1 |
| ENSG0000 | mucosal h | Inflamed | FITM2     | protein_cc     | chr20 | 42931478 | 42939809 | - | 4597 | 808.7041 | 0        | 0.335898 | 0.124879 | 2.689784 | 0.008392 | 0.045195 | 1 |
| ENSG0000 | mucosal h | Inflamed | C11orf54  | protein_cc     | chr11 | 93474757 | 93497915 | + | 6269 | 1168.492 | 0        | 0.566442 | 0.210591 | 2.689766 | 0.008393 | 0.045195 | 1 |
| ENSG0000 | mucosal h | Inflamed | RP11-1921 | protein_cc     | chr17 | 26782770 | 26941215 | - | 6244 | 129.3532 | 0.002387 | 0.589831 | 0.219339 | 2.689132 | 0.008407 | 0.045265 | 1 |
| ENSG0000 | mucosal h | Inflamed | SLFN11    | protein_cc     | chr17 | 33677324 | 33700720 | - | 5982 | 1260.134 | 0        | -0.66543 | 0.247475 | -2.68888 | 0.008413 | 0.045283 | 1 |
| ENSG0000 | mucosal h | Inflamed | AMH       | protein_cc     | chr19 | 2249308  | 2252072  | + | 2587 | 31.30549 | 0.023866 | 0.599188 | 0.222842 | 2.688844 | 0.008414 | 0.045283 | 1 |
| ENSG0000 | mucosal h | Inflamed | CABLES1   | protein_cc     | chr18 | 20714528 | 20840431 | + | 6654 | 775.7136 | 0        | 0.350712 | 0.130437 | 2.688749 | 0.008416 | 0.045286 | 1 |
| ENSG0000 | mucosal h | Inflamed | ERO1L     | protein_cc     | chr14 | 53106634 | 53162618 | - | 7548 | 4191.692 | 0        | -0.67272 | 0.250265 | -2.68803 | 0.008433 | 0.045367 | 1 |
| ENSG0000 | mucosal h | Inflamed | RP11-334E | antisense      | chr11 | 1.19E+08 | 1.19E+08 | + | 894  | 5.415274 | 0.252983 | 0.554692 | 0.206366 | 2.687902 | 0.008436 | 0.045374 | 1 |
| ENSG0000 | mucosal h | Inflamed | KANSL3    | protein_cc     | chr2  | 97258907 | 97308524 | - | 9015 | 3007.902 | 0        | 0.311425 | 0.115881 | 2.687455 | 0.008447 | 0.045422 | 1 |
| ENSG0000 | mucosal h | Inflamed | ZSCAN31   | protein_cc     | chr6  | 28292470 | 28324048 | - | 4957 | 163.2005 | 0        | 0.498371 | 0.185496 | 2.686689 | 0.008465 | 0.045505 | 1 |
| ENSG0000 | mucosal h | Inflamed | ZNF19     | protein_cc     | chr16 | 71498453 | 71598992 | - | 7983 | 84.6611  | 0.002387 | 0.452726 | 0.168513 | 2.686589 | 0.008467 | 0.045505 | 1 |
| ENSG0000 | mucosal h | Inflamed | CLN3      | protein_cc     | chr16 | 28477983 | 28506896 | - | 4736 | 1874.305 | 0        | 0.305777 | 0.113817 | 2.686578 | 0.008467 | 0.045505 | 1 |
| ENSG0000 | mucosal h | Inflamed | PEX19     | protein_cc     | chr1  | 1.6E+08  | 1.6E+08  | - | 4461 | 1551.981 | 0        | 0.273448 | 0.101786 | 2.686492 | 0.00847  | 0.045507 | 1 |
| ENSG0000 | mucosal h | Inflamed | LONRF3    | protein_cc     | chrX  | 1.18E+08 | 1.18E+08 | + | 4037 | 295.58   | 0        | 0.482984 | 0.1798   | 2.686225 | 0.008476 | 0.045531 | 1 |
| ENSG0000 | mucosal h | Inflamed | ESPN      | protein_cc     | chr1  | 6484848  | 6521430  | + | 4109 | 1556.601 | 0        | 0.850995 | 0.316831 | 2.685955 | 0.008482 | 0.045556 | 1 |
| ENSG0000 | mucosal h | Inflamed | MYB       | protein_cc     | chr6  | 1.36E+08 | 1.36E+08 | + | 5486 | 1666.671 | 0        | 0.686005 | 0.25549  | 2.685056 | 0.008503 | 0.045661 | 1 |
| ENSG0000 | mucosal h | Inflamed | TSPAN4    | protein_cc     | chr11 | 842808   | 867116   | + | 5841 | 1232.979 | 0        | -0.49118 | 0.182946 | -2.68485 | 0.008508 | 0.045678 | 1 |
| ENSG0000 | mucosal h | Inflamed | PDE6B     | protein_cc     | chr4  | 619373   | 664571   | + | 5086 | 57.83532 | 0        | -0.50268 | 0.187239 | -2.68471 | 0.008512 | 0.045686 | 1 |
| ENSG0000 | mucosal h | Inflamed | RP11-1591 | antisense      | chr8  | 70746346 | 70767206 | + | 1967 | 9.28401  | 0.100239 | -0.60515 | 0.22541  | -2.68464 | 0.008513 | 0.045686 | 1 |
| ENSG0000 | mucosal h | Inflamed | RP11-3161 | lincRNA        | chr17 | 75718954 | 75724641 | - | 2281 | 0.825776 | 0.797136 | -0.32281 | 0.120249 | -2.68448 | 0.008517 | 0.045697 | 1 |

|          |           |          |            |            |       |          |          |   |      |          |          |          |          |          |          |          |   |
|----------|-----------|----------|------------|------------|-------|----------|----------|---|------|----------|----------|----------|----------|----------|----------|----------|---|
| ENSG0000 | mucosal h | Inflamed | S100A2     | protein_cc | chr1  | 1.54E+08 | 1.54E+08 | - | 1567 | 56.90453 | 0        | -0.82392 | 0.306928 | -2.68441 | 0.008519 | 0.045697 | 1 |
| ENSG0000 | mucosal h | Inflamed | ABCD3      | protein_cc | chr1  | 94883933 | 94984222 | + | 7669 | 2242.644 | 0        | 0.578012 | 0.215364 | 2.683879 | 0.008531 | 0.045755 | 1 |
| ENSG0000 | mucosal h | Inflamed | AC005255   | pseudoger  | chr19 | 14903121 | 14903589 | + | 469  | 5.625298 | 0.095465 | -0.45915 | 0.171086 | -2.68373 | 0.008535 | 0.045764 | 1 |
| ENSG0000 | mucosal h | Inflamed | COL15A1    | protein_cc | chr9  | 1.02E+08 | 1.02E+08 | + | 6637 | 5991.692 | 0        | -0.85714 | 0.319391 | -2.68366 | 0.008537 | 0.045764 | 1 |
| ENSG0000 | mucosal h | Inflamed | CSRP2BP    | protein_cc | chr20 | 18118762 | 18169031 | + | 4251 | 581.2124 | 0        | 0.362689 | 0.135163 | 2.683338 | 0.008544 | 0.045796 | 1 |
| ENSG0000 | mucosal h | Inflamed | RP11-565M  | lincRNA    | chr1  | 2.09E+08 | 2.09E+08 | - | 279  | 0.961814 | 0.756563 | -0.38482 | 0.143424 | -2.6831  | 0.00855  | 0.045816 | 1 |
| ENSG0000 | mucosal h | Inflamed | TACR1      | protein_cc | chr2  | 75273590 | 75426826 | - | 5308 | 55.60621 | 0.045346 | -0.82711 | 0.308361 | -2.68229 | 0.008569 | 0.045911 | 1 |
| ENSG0000 | mucosal h | Inflamed | COL5A3     | protein_cc | chr19 | 10070237 | 10121147 | - | 6750 | 1311.957 | 0        | -0.76559 | 0.285461 | -2.68193 | 0.008578 | 0.045947 | 1 |
| ENSG0000 | mucosal h | Inflamed | AC016700   | lincRNA    | chr2  | 70351168 | 70352449 | - | 662  | 8.081146 | 0.023866 | -0.39041 | 0.145579 | -2.68174 | 0.008582 | 0.045962 | 1 |
| ENSG0000 | mucosal h | Inflamed | RP11-867C  | protein_cc | chr11 | 66115421 | 66132275 | + | 1540 | 264.8592 | 0        | 0.433971 | 0.161849 | 2.681337 | 0.008592 | 0.045997 | 1 |
| ENSG0000 | mucosal h | Inflamed | PARS2      | protein_cc | chr1  | 55222571 | 55230187 | - | 2347 | 338.9356 | 0        | 0.257864 | 0.096174 | 2.681233 | 0.008594 | 0.045997 | 1 |
| ENSG0000 | mucosal h | Inflamed | TMSB15A    | protein_cc | chrX  | 1.02E+08 | 1.02E+08 | - | 685  | 8.918854 | 0.093079 | -0.62856 | 0.234434 | -2.68116 | 0.008596 | 0.045997 | 1 |
| ENSG0000 | mucosal h | Inflamed | TRPC7-AS1  | antisense  | chr5  | 1.36E+08 | 1.36E+08 | + | 460  | 38.10024 | 0.019093 | 0.674635 | 0.251631 | 2.681045 | 0.008599 | 0.045997 | 1 |
| ENSG0000 | mucosal h | Inflamed | GAL3ST4    | protein_cc | chr7  | 99756867 | 99766373 | - | 3397 | 431.6539 | 0        | 0.52721  | 0.196644 | 2.681038 | 0.008599 | 0.045997 | 1 |
| ENSG0000 | mucosal h | Inflamed | SNX21      | protein_cc | chr20 | 44462449 | 44471914 | + | 4066 | 712.5967 | 0        | 0.265356 | 0.098975 | 2.681033 | 0.008599 | 0.045997 | 1 |
| ENSG0000 | mucosal h | Inflamed | PTRH1      | protein_cc | chr9  | 1.3E+08  | 1.3E+08  | - | 3595 | 243.0573 | 0        | -0.31303 | 0.116767 | -2.68085 | 0.008604 | 0.046011 | 1 |
| ENSG0000 | mucosal h | Inflamed | GJC1       | protein_cc | chr17 | 42875816 | 42908184 | - | 8660 | 287.6969 | 0.01432  | -0.82244 | 0.306878 | -2.68001 | 0.008624 | 0.046109 | 1 |
| ENSG0000 | mucosal h | Inflamed | CTB-83J4.2 | lincRNA    | chr19 | 55100906 | 55101752 | + | 847  | 2.902148 | 0.553699 | -0.58564 | 0.218542 | -2.67975 | 0.00863  | 0.046133 | 1 |
| ENSG0000 | mucosal h | Inflamed | FTL        | protein_cc | chr19 | 49468558 | 49470135 | + | 878  | 70707.24 | 0        | -0.43834 | 0.16358  | -2.67965 | 0.008632 | 0.046137 | 1 |
| ENSG0000 | mucosal h | Inflamed | RP11-84A1  | sense_intr | chr1  | 10002981 | 10010032 | + | 440  | 25.38902 | 0.009547 | 0.483131 | 0.180324 | 2.679237 | 0.008642 | 0.046167 | 1 |
| ENSG0000 | mucosal h | Inflamed | APOC1P1    | pseudoger  | chr19 | 45430061 | 45434643 | + | 938  | 2.52506  | 0.436754 | -0.41075 | 0.153309 | -2.6792  | 0.008643 | 0.046167 | 1 |
| ENSG0000 | mucosal h | Inflamed | INPP5A     | protein_cc | chr10 | 1.34E+08 | 1.35E+08 | + | 3701 | 1451.057 | 0        | 0.21783  | 0.081304 | 2.67919  | 0.008643 | 0.046167 | 1 |
| ENSG0000 | mucosal h | Inflamed | CD52       | protein_cc | chr1  | 26644448 | 26647014 | + | 935  | 824.2243 | 0        | -0.67961 | 0.253671 | -2.67908 | 0.008646 | 0.046172 | 1 |
| ENSG0000 | mucosal h | Inflamed | CLEC11A    | protein_cc | chr19 | 51226586 | 51228974 | + | 1468 | 529.8091 | 0        | -0.53848 | 0.201023 | -2.67872 | 0.008655 | 0.046202 | 1 |
| ENSG0000 | mucosal h | Inflamed | RP11-367J  | lincRNA    | chr4  | 7096298  | 7105112  | - | 3763 | 7.252983 | 0.083532 | 0.504318 | 0.18827  | 2.678699 | 0.008655 | 0.046202 | 1 |
| ENSG0000 | mucosal h | Inflamed | AC007362   | pseudoger  | chr2  | 2.07E+08 | 2.07E+08 | + | 1886 | 122.7232 | 0.004773 | -0.67604 | 0.252388 | -2.67858 | 0.008658 | 0.046209 | 1 |
| ENSG0000 | mucosal h | Inflamed | IL22RA2    | protein_cc | chr6  | 1.37E+08 | 1.37E+08 | - | 2886 | 22.19093 | 0.131265 | -0.79747 | 0.297736 | -2.67844 | 0.008661 | 0.046217 | 1 |
| ENSG0000 | mucosal h | Inflamed | TLR1       | protein_cc | chr4  | 38792298 | 38858438 | - | 4533 | 296.7852 | 0        | -0.69433 | 0.259238 | -2.67833 | 0.008664 | 0.046221 | 1 |
| ENSG0000 | mucosal h | Inflamed | ZNF285     | protein_cc | chr19 | 44886459 | 44905774 | - | 6869 | 34.4105  | 0.019093 | 0.554612 | 0.207109 | 2.67788  | 0.008675 | 0.04627  | 1 |
| ENSG0000 | mucosal h | Inflamed | C9orf139   | protein_cc | chr9  | 1.4E+08  | 1.4E+08  | + | 3815 | 42.91169 | 0.02864  | -0.81544 | 0.304549 | -2.67752 | 0.008684 | 0.046306 | 1 |
| ENSG0000 | mucosal h | Inflamed | EPB41L1    | protein_cc | chr20 | 34679426 | 34820721 | + | 7859 | 2260.988 | 0        | 0.444327 | 0.165971 | 2.677134 | 0.008693 | 0.046347 | 1 |
| ENSG0000 | mucosal h | Inflamed | C3orf35    | protein_cc | chr3  | 37427760 | 37476988 | + | 3072 | 22.642   | 0.02148  | 0.635896 | 0.237572 | 2.676648 | 0.008705 | 0.0464   | 1 |
| ENSG0000 | mucosal h | Inflamed | COP22      | protein_cc | chr17 | 46103533 | 46115392 | - | 1847 | 148.2172 | 0        | -0.44694 | 0.166995 | -2.67634 | 0.008712 | 0.04643  | 1 |
| ENSG0000 | mucosal h | Inflamed | DOCK1      | protein_cc | chr10 | 1.29E+08 | 1.29E+08 | + | 8079 | 2635.379 | 0        | 0.490709 | 0.183355 | 2.676273 | 0.008714 | 0.04643  | 1 |
| ENSG0000 | mucosal h | Inflamed | RP11-98F1  | antisense  | chr13 | 1.14E+08 | 1.14E+08 | - | 182  | 2.422434 | 0.415274 | 0.43506  | 0.162567 | 2.676194 | 0.008716 | 0.046431 | 1 |
| ENSG0000 | mucosal h | Inflamed | PHYKPL     | protein_cc | chr5  | 1.78E+08 | 1.78E+08 | - | 8402 | 3678.759 | 0        | 0.35139  | 0.131323 | 2.675761 | 0.008726 | 0.046477 | 1 |
| ENSG0000 | mucosal h | Inflamed | RP11-141M  | lincRNA    | chr13 | 33929343 | 34250905 | - | 1535 | 13.35322 | 0.031026 | 0.506722 | 0.189394 | 2.675489 | 0.008733 | 0.046503 | 1 |
| ENSG0000 | mucosal h | Inflamed | PEX6       | protein_cc | chr6  | 42931608 | 42946958 | - | 3499 | 1689.358 | 0        | 0.32406  | 0.121154 | 2.674785 | 0.00875  | 0.046585 | 1 |
| ENSG0000 | mucosal h | Inflamed | RASGRP1    | protein_cc | chr15 | 38780304 | 38857776 | - | 6090 | 315.9451 | 0.002387 | -0.71717 | 0.268147 | -2.67455 | 0.008756 | 0.046606 | 1 |
| ENSG0000 | mucosal h | Inflamed | RP11-141L  | pseudoger  | chr5  | 69515745 | 69580686 | - | 667  | 8.603819 | 0.116945 | 0.554933 | 0.207506 | 2.674293 | 0.008762 | 0.046629 | 1 |

|          |           |          |           |                  |          |          |   |       |          |          |          |          |          |          |          |   |
|----------|-----------|----------|-----------|------------------|----------|----------|---|-------|----------|----------|----------|----------|----------|----------|----------|---|
| ENSG0000 | mucosal h | Inflamed | NDUFV1    | protein_cc chr11 | 67374323 | 67380006 | + | 4154  | 6506.757 | 0        | 0.244596 | 0.091479 | 2.673794 | 0.008774 | 0.046676 | 1 |
| ENSG0000 | mucosal h | Inflamed | DIRC1     | protein_cc chr2  | 1.9E+08  | 1.9E+08  | - | 1037  | 1.551313 | 0.778043 | -0.59165 | 0.221279 | -2.67379 | 0.008774 | 0.046676 | 1 |
| ENSG0000 | mucosal h | Inflamed | PAX5      | protein_cc chr9  | 36833272 | 37034103 | - | 9254  | 831.8902 | 0        | -1.23994 | 0.46379  | -2.67348 | 0.008782 | 0.046706 | 1 |
| ENSG0000 | mucosal h | Inflamed | RP11-141M | processed_chr3   | 42850906 | 42949597 | + | 3933  | 6.854415 | 0.121718 | 0.470963 | 0.176168 | 2.673375 | 0.008784 | 0.046711 | 1 |
| ENSG0000 | mucosal h | Inflamed | ANKRD2    | protein_cc chr10 | 99332198 | 99343641 | + | 1509  | 1.980907 | 0.563246 | -0.46889 | 0.175417 | -2.67298 | 0.008794 | 0.046752 | 1 |
| ENSG0000 | mucosal h | Inflamed | KCNE3     | protein_cc chr11 | 74165886 | 74178774 | - | 3677  | 2701.761 | 0        | -0.44079 | 0.16494  | -2.67243 | 0.008807 | 0.046814 | 1 |
| ENSG0000 | mucosal h | Inflamed | ZNF16     | protein_cc chr8  | 1.46E+08 | 1.46E+08 | - | 5237  | 234.4726 | 0        | 0.29415  | 0.110089 | 2.671927 | 0.00882  | 0.04686  | 1 |
| ENSG0000 | mucosal h | Inflamed | REPIN1    | protein_cc chr7  | 1.5E+08  | 1.5E+08  | + | 4649  | 7965.862 | 0        | 0.284996 | 0.106666 | 2.671868 | 0.008821 | 0.04686  | 1 |
| ENSG0000 | mucosal h | Inflamed | DHRS4-AS1 | processed_chr14  | 24407940 | 24458048 | - | 3593  | 623.0811 | 0        | 0.360072 | 0.134765 | 2.671861 | 0.008821 | 0.04686  | 1 |
| ENSG0000 | mucosal h | Inflamed | RP5-855D2 | sense_intr chr8  | 183119   | 183692   | + | 574   | 24.09785 | 0.038186 | 0.631845 | 0.236497 | 2.671681 | 0.008826 | 0.046865 | 1 |
| ENSG0000 | mucosal h | Inflamed | VPS51     | protein_cc chr11 | 64856796 | 64879332 | + | 4878  | 6538.914 | 0        | 0.269161 | 0.100746 | 2.671679 | 0.008826 | 0.046865 | 1 |
| ENSG0000 | mucosal h | Inflamed | NAMPT     | protein_cc chr7  | 1.06E+08 | 1.06E+08 | - | 9049  | 6681.869 | 0        | -0.79929 | 0.299203 | -2.67141 | 0.008832 | 0.046891 | 1 |
| ENSG0000 | mucosal h | Inflamed | WDSUB1    | protein_cc chr2  | 1.6E+08  | 1.6E+08  | - | 2135  | 223.9165 | 0        | 0.329053 | 0.123197 | 2.670956 | 0.008843 | 0.04694  | 1 |
| ENSG0000 | mucosal h | Inflamed | SSSCA1    | protein_cc chr11 | 65337901 | 65341413 | + | 2008  | 440.2267 | 0        | -0.32114 | 0.12024  | -2.67084 | 0.008846 | 0.046946 | 1 |
| ENSG0000 | mucosal h | Inflamed | NRP2      | protein_cc chr2  | 2.07E+08 | 2.07E+08 | + | 11380 | 996.1456 | 0        | -0.67394 | 0.252383 | -2.67031 | 0.008859 | 0.047005 | 1 |
| ENSG0000 | mucosal h | Inflamed | CD14      | protein_cc chr5  | 1.4E+08  | 1.4E+08  | - | 1886  | 3427.308 | 0        | -0.46731 | 0.175008 | -2.6702  | 0.008862 | 0.04701  | 1 |
| ENSG0000 | mucosal h | Inflamed | CTA-221G1 | lincRNA chr22    | 25608709 | 25609652 | + | 482   | 4.916468 | 0.264916 | 0.5623   | 0.210609 | 2.669878 | 0.00887  | 0.047043 | 1 |
| ENSG0000 | mucosal h | Inflamed | C11orf21  | protein_cc chr11 | 2316875  | 2324279  | - | 4199  | 151.1551 | 0.002387 | -0.73489 | 0.275272 | -2.66969 | 0.008874 | 0.047057 | 1 |
| ENSG0000 | mucosal h | Inflamed | AC007128  | antisense chr7   | 8301894  | 8384146  | + | 1853  | 2.300716 | 0.73031  | 0.498859 | 0.18695  | 2.668404 | 0.008906 | 0.047215 | 1 |
| ENSG0000 | mucosal h | Inflamed | PKMP1     | pseudoger chr1   | 1.15E+08 | 1.15E+08 | + | 1523  | 4.367542 | 0.200477 | -0.48138 | 0.180406 | -2.66834 | 0.008908 | 0.047215 | 1 |
| ENSG0000 | mucosal h | Inflamed | KLHL23    | protein_cc chr2  | 1.71E+08 | 1.71E+08 | + | 5509  | 334.5656 | 0.002387 | 0.613812 | 0.230054 | 2.668119 | 0.008913 | 0.047234 | 1 |
| ENSG0000 | mucosal h | Inflamed | IDH3B     | protein_cc chr20 | 2639041  | 2644865  | - | 2299  | 2193.15  | 0        | 0.217547 | 0.081547 | 2.667747 | 0.008922 | 0.047274 | 1 |
| ENSG0000 | mucosal h | Inflamed | CTB-161M  | antisense chr5   | 1.18E+08 | 1.18E+08 | - | 1335  | 1.548926 | 0.551313 | 0.354693 | 0.132976 | 2.667343 | 0.008932 | 0.047317 | 1 |
| ENSG0000 | mucosal h | Inflamed | KLIF15    | protein_cc chr3  | 1.26E+08 | 1.26E+08 | - | 2848  | 86.74224 | 0.009547 | -0.58646 | 0.219896 | -2.66698 | 0.008941 | 0.047347 | 1 |
| ENSG0000 | mucosal h | Inflamed | AC091492  | pseudoger chr3   | 12369502 | 12369773 | + | 272   | 0.926014 | 0.76611  | 0.321593 | 0.120584 | 2.666971 | 0.008942 | 0.047347 | 1 |
| ENSG0000 | mucosal h | Inflamed | FLT1      | protein_cc chr13 | 28874489 | 29069265 | - | 8072  | 880.0358 | 0        | -0.62325 | 0.233706 | -2.66682 | 0.008945 | 0.047357 | 1 |
| ENSG0000 | mucosal h | Inflamed | AL122127  | miRNA chr14      | 1.06E+08 | 1.06E+08 | - | 60    | 19.98807 | 0.085919 | -0.81141 | 0.304279 | -2.66666 | 0.008949 | 0.047369 | 1 |
| ENSG0000 | mucosal h | Inflamed | ZNF320    | protein_cc chr19 | 53367043 | 53400946 | - | 8327  | 958.9403 | 0        | 0.646861 | 0.242584 | 2.666544 | 0.008952 | 0.047374 | 1 |
| ENSG0000 | mucosal h | Inflamed | VWA5B2    | protein_cc chr3  | 1.84E+08 | 1.84E+08 | + | 5730  | 98.50119 | 0.004773 | 0.781826 | 0.293235 | 2.666214 | 0.00896  | 0.047408 | 1 |
| ENSG0000 | mucosal h | Inflamed | UCHL1     | protein_cc chr4  | 41258430 | 41270472 | + | 2282  | 62.69451 | 0.004773 | -0.86495 | 0.324493 | -2.66556 | 0.008977 | 0.047485 | 1 |
| ENSG0000 | mucosal h | Inflamed | RP5-1180C | antisense chr1   | 1.8E+08  | 1.8E+08  | - | 4866  | 265.3914 | 0.004773 | 0.818359 | 0.307048 | 2.665246 | 0.008985 | 0.047513 | 1 |
| ENSG0000 | mucosal h | Inflamed | THRA      | protein_cc chr17 | 38214543 | 38250120 | + | 6959  | 3114.076 | 0        | 0.345772 | 0.129736 | 2.665202 | 0.008986 | 0.047513 | 1 |
| ENSG0000 | mucosal h | Inflamed | NRP1      | protein_cc chr10 | 33466420 | 33625190 | - | 11517 | 2338.613 | 0        | -0.52458 | 0.196838 | -2.66503 | 0.00899  | 0.047525 | 1 |
| ENSG0000 | mucosal h | Inflamed | RP11-109C | antisense chr4   | 79694808 | 79697127 | - | 2320  | 1.408115 | 0.653938 | 0.368479 | 0.138276 | 2.664802 | 0.008996 | 0.047546 | 1 |
| ENSG0000 | mucosal h | Inflamed | ZNF3      | protein_cc chr7  | 99661656 | 99680171 | - | 5420  | 1248.313 | 0        | 0.323486 | 0.121404 | 2.664538 | 0.009002 | 0.047571 | 1 |
| ENSG0000 | mucosal h | Inflamed | LIPH      | protein_cc chr3  | 1.85E+08 | 1.85E+08 | - | 4122  | 4190.971 | 0        | 0.776001 | 0.29125  | 2.664384 | 0.009006 | 0.047582 | 1 |
| ENSG0000 | mucosal h | Inflamed | PFKFB2    | protein_cc chr1  | 2.07E+08 | 2.07E+08 | + | 9815  | 3403.217 | 0        | 0.637096 | 0.239148 | 2.664022 | 0.009015 | 0.04762  | 1 |
| ENSG0000 | mucosal h | Inflamed | RASSF2    | protein_cc chr20 | 4760669  | 4804291  | - | 5759  | 2158.943 | 0        | -0.62526 | 0.234835 | -2.66257 | 0.009051 | 0.047803 | 1 |
| ENSG0000 | mucosal h | Inflamed | RP11-809I | pseudoger chr11  | 73221703 | 73221865 | + | 163   | 103.148  | 0.019093 | 0.624795 | 0.234667 | 2.662476 | 0.009054 | 0.047804 | 1 |
| ENSG0000 | mucosal h | Inflamed | RASL10B   | protein_cc chr17 | 34058668 | 34070540 | + | 3502  | 36.87828 | 0.009547 | -0.85337 | 0.320524 | -2.66242 | 0.009055 | 0.047804 | 1 |



|          |           |          |           |            |       |          |          |   |       |          |          |          |          |          |          |          |   |
|----------|-----------|----------|-----------|------------|-------|----------|----------|---|-------|----------|----------|----------|----------|----------|----------|----------|---|
| ENSG0000 | mucosal h | Inflamed | AIP       | protein_cc | chr11 | 67250512 | 67258574 | + | 1640  | 1141.544 | 0        | -0.27522 | 0.10338  | -2.66226 | 0.009059 | 0.047814 | 1 |
| ENSG0000 | mucosal h | Inflamed | C8orf82   | protein_cc | chr8  | 1.46E+08 | 1.46E+08 | - | 3001  | 1481.714 | 0        | 0.299845 | 0.112634 | 2.662114 | 0.009063 | 0.047824 | 1 |
| ENSG0000 | mucosal h | Inflamed | PPP1R14C  | protein_cc | chr6  | 1.5E+08  | 1.51E+08 | + | 2152  | 689.0191 | 0        | 0.545134 | 0.204821 | 2.661519 | 0.009078 | 0.047894 | 1 |
| ENSG0000 | mucosal h | Inflamed | AC112198  | pseudoger  | chr5  | 54104038 | 54168379 | - | 6996  | 1.792363 | 0.653938 | -0.52733 | 0.198151 | -2.66125 | 0.009084 | 0.047919 | 1 |
| ENSG0000 | mucosal h | Inflamed | RP11-820  | pseudoger  | chr17 | 28102765 | 28103719 | - | 955   | 2.264916 | 0.479714 | 0.454394 | 0.170767 | 2.660904 | 0.009093 | 0.04795  | 1 |
| ENSG0000 | mucosal h | Inflamed | ATP6V1E2  | protein_cc | chr2  | 46717889 | 46769696 | - | 5283  | 104.568  | 0        | -0.3094  | 0.116276 | -2.66088 | 0.009094 | 0.04795  | 1 |
| ENSG0000 | mucosal h | Inflamed | ITGAL     | protein_cc | chr16 | 30483979 | 30534506 | + | 6472  | 2557.103 | 0        | -0.57917 | 0.217722 | -2.66015 | 0.009112 | 0.048037 | 1 |
| ENSG0000 | mucosal h | Inflamed | IGHV3-16  | IG_V_gene  | chr14 | 1.07E+08 | 1.07E+08 | - | 425   | 2.46778  | 0.48926  | -0.47732 | 0.179462 | -2.65974 | 0.009122 | 0.048081 | 1 |
| ENSG0000 | mucosal h | Inflamed | GNB5      | protein_cc | chr15 | 52413117 | 52483566 | - | 7487  | 444.6492 | 0        | -0.40378 | 0.151838 | -2.65929 | 0.009134 | 0.048129 | 1 |
| ENSG0000 | mucosal h | Inflamed | APOBEC1   | protein_cc | chr12 | 7801996  | 7818499  | - | 889   | 188.5465 | 0.009547 | -1.04406 | 0.392617 | -2.65924 | 0.009135 | 0.048129 | 1 |
| ENSG0000 | mucosal h | Inflamed | ERN2      | protein_cc | chr16 | 23701647 | 23724821 | - | 4998  | 6081.905 | 0        | 0.727302 | 0.273524 | 2.659008 | 0.009141 | 0.04815  | 1 |
| ENSG0000 | mucosal h | Inflamed | FBXL20    | protein_cc | chr17 | 37415384 | 37558776 | - | 3261  | 298.821  | 0        | 0.352701 | 0.132649 | 2.658896 | 0.009144 | 0.048156 | 1 |
| ENSG0000 | mucosal h | Inflamed | PKN1      | protein_cc | chr19 | 14543865 | 14582679 | + | 4606  | 2892.215 | 0        | -0.42211 | 0.158768 | -2.65865 | 0.00915  | 0.048177 | 1 |
| ENSG0000 | mucosal h | Inflamed | TICAM2    | protein_cc | chr5  | 1.15E+08 | 1.15E+08 | - | 4205  | 14.52983 | 0.040573 | -0.52852 | 0.198798 | -2.65858 | 0.009152 | 0.048177 | 1 |
| ENSG0000 | mucosal h | Inflamed | AC127496  | protein_cc | chr17 | 78977135 | 78978932 | + | 1798  | 70.97613 | 0.023866 | 0.500773 | 0.188373 | 2.658416 | 0.009156 | 0.048177 | 1 |
| ENSG0000 | mucosal h | Inflamed | GTF3A     | protein_cc | chr13 | 27998681 | 28009958 | + | 2999  | 1709.017 | 0        | -0.28805 | 0.108353 | -2.6584  | 0.009156 | 0.048177 | 1 |
| ENSG0000 | mucosal h | Inflamed | LINC00863 | lincRNA    | chr10 | 89102493 | 89117639 | + | 3287  | 164.1289 | 0        | 0.351211 | 0.132115 | 2.658376 | 0.009157 | 0.048177 | 1 |
| ENSG0000 | mucosal h | Inflamed | LINC00594 | lincRNA    | chr15 | 40664026 | 40664677 | + | 401   | 15.20286 | 0.167064 | 0.732483 | 0.275622 | 2.657559 | 0.009178 | 0.048276 | 1 |
| ENSG0000 | mucosal h | Inflamed | NRG1      | protein_cc | chr8  | 31496902 | 32622548 | + | 7657  | 794.2673 | 0        | -0.68918 | 0.259338 | -2.65748 | 0.00918  | 0.048277 | 1 |
| ENSG0000 | mucosal h | Inflamed | U47924.2  | antisense  | chr12 | 7074112  | 7074545  | + | 434   | 4.699284 | 0.212411 | 0.465791 | 0.175286 | 2.657324 | 0.009184 | 0.048288 | 1 |
| ENSG0000 | mucosal h | Inflamed | COX11     | protein_cc | chr17 | 53029263 | 53046146 | - | 6488  | 1014.53  | 0        | 0.399941 | 0.150515 | 2.657159 | 0.009188 | 0.048288 | 1 |
| ENSG0000 | mucosal h | Inflamed | LY6K      | protein_cc | chr8  | 1.44E+08 | 1.44E+08 | + | 4049  | 13.64439 | 0.085919 | -0.82406 | 0.31013  | -2.65714 | 0.009188 | 0.048288 | 1 |
| ENSG0000 | mucosal h | Inflamed | BICD1     | protein_cc | chr12 | 32259769 | 32536567 | + | 11790 | 269.8831 | 0.002387 | -0.60961 | 0.229429 | -2.65706 | 0.009191 | 0.048288 | 1 |
| ENSG0000 | mucosal h | Inflamed | MSANTD3   | protein_cc | chr9  | 1.03E+08 | 1.03E+08 | + | 2763  | 322.4511 | 0        | -0.45189 | 0.170076 | -2.65697 | 0.009193 | 0.048288 | 1 |
| ENSG0000 | mucosal h | Inflamed | GHR       | protein_cc | chr5  | 42423879 | 42721979 | + | 5871  | 112.0167 | 0.009547 | 0.635857 | 0.239317 | 2.656963 | 0.009193 | 0.048288 | 1 |
| ENSG0000 | mucosal h | Inflamed | STAU2-AS1 | lincRNA    | chr8  | 74332239 | 74353761 | + | 2279  | 2.73031  | 0.443914 | 0.476043 | 0.179182 | 2.656756 | 0.009198 | 0.048306 | 1 |
| ENSG0000 | mucosal h | Inflamed | ACTN3     | polymorpt  | chr11 | 66313866 | 66330800 | + | 3517  | 6.121718 | 0.25537  | -0.61325 | 0.230838 | -2.65665 | 0.009201 | 0.048311 | 1 |
| ENSG0000 | mucosal h | Inflamed | RP11-106  | antisense  | chr15 | 63124323 | 63176233 | - | 4086  | 13.19093 | 0.088305 | 0.767702 | 0.288991 | 2.656489 | 0.009205 | 0.048315 | 1 |
| ENSG0000 | mucosal h | Inflamed | KLKB1     | protein_cc | chr4  | 1.87E+08 | 1.87E+08 | + | 2953  | 45.6253  | 0.02864  | 0.801776 | 0.30182  | 2.656473 | 0.009205 | 0.048315 | 1 |
| ENSG0000 | mucosal h | Inflamed | CD33      | protein_cc | chr19 | 51728320 | 51747115 | + | 5975  | 243.6778 | 0        | -0.40495 | 0.152448 | -2.65635 | 0.009209 | 0.048322 | 1 |
| ENSG0000 | mucosal h | Inflamed | CYB5RL    | protein_cc | chr1  | 54638009 | 54665709 | - | 6244  | 230.7351 | 0        | 0.50428  | 0.189851 | 2.656193 | 0.009212 | 0.048333 | 1 |
| ENSG0000 | mucosal h | Inflamed | RP11-523  | antisense  | chr10 | 50184599 | 50201091 | - | 1610  | 2.408115 | 0.46778  | 0.455297 | 0.171434 | 2.655813 | 0.009222 | 0.048374 | 1 |
| ENSG0000 | mucosal h | Inflamed | PRORS1P   | pseudoger  | chr2  | 55509455 | 55511658 | + | 2204  | 65.83294 | 0.002387 | 0.63505  | 0.239147 | 2.655482 | 0.009231 | 0.048409 | 1 |
| ENSG0000 | mucosal h | Inflamed | CTD-252   | antisense  | chr11 | 1.2E+08  | 1.2E+08  | + | 523   | 11.05251 | 0.033413 | 0.489925 | 0.184555 | 2.654631 | 0.009252 | 0.048504 | 1 |
| ENSG0000 | mucosal h | Inflamed | C2ORF15   | protein_cc | chr2  | 99757948 | 99767950 | + | 2098  | 37.69928 | 0.002387 | 0.456226 | 0.17187  | 2.654482 | 0.009256 | 0.048504 | 1 |
| ENSG0000 | mucosal h | Inflamed | RP11-288  | pseudoger  | chr6  | 7516833  | 7518073  | - | 1241  | 0.97852  | 0.73747  | 0.252962 | 0.095297 | 2.654458 | 0.009257 | 0.048504 | 1 |
| ENSG0000 | mucosal h | Inflamed | ENOSF1    | protein_cc | chr18 | 670324   | 712676   | - | 10616 | 2025.706 | 0        | 0.496226 | 0.186946 | 2.654374 | 0.009259 | 0.048504 | 1 |
| ENSG0000 | mucosal h | Inflamed | RP11-127  | lincRNA    | chr7  | 5468362  | 5469303  | + | 942   | 19.35561 | 0        | 0.378807 | 0.142712 | 2.65435  | 0.00926  | 0.048504 | 1 |
| ENSG0000 | mucosal h | Inflamed | RP11-440  | lincRNA    | chr9  | 94188520 | 94189426 | + | 474   | 1.689737 | 0.594272 | -0.3695  | 0.139209 | -2.65429 | 0.009261 | 0.048504 | 1 |
| ENSG0000 | mucosal h | Inflamed | SLC39A1   | protein_cc | chr1  | 1.54E+08 | 1.54E+08 | - | 3246  | 3792.026 | 0        | -0.19576 | 0.073752 | -2.65424 | 0.009262 | 0.048504 | 1 |

|          |           |          |           |            |       |          |          |   |       |          |          |          |          |          |          |          |   |
|----------|-----------|----------|-----------|------------|-------|----------|----------|---|-------|----------|----------|----------|----------|----------|----------|----------|---|
| ENSG0000 | mucosal h | Inflamed | TEF       | protein_cc | chr22 | 41763337 | 41795330 | + | 4715  | 2173.337 | 0        | 0.476021 | 0.179347 | 2.654192 | 0.009264 | 0.048504 | 1 |
| ENSG0000 | mucosal h | Inflamed | RP11-165J | antisense  | chr9  | 96197614 | 96199403 | - | 691   | 26.61575 | 0.040573 | 0.660961 | 0.24905  | 2.653933 | 0.00927  | 0.048529 | 1 |
| ENSG0000 | mucosal h | Inflamed | HTR4      | protein_cc | chr5  | 1.48E+08 | 1.48E+08 | - | 7087  | 167.4511 | 0.019093 | 1.042921 | 0.392985 | 2.653841 | 0.009273 | 0.048532 | 1 |
| ENSG0000 | mucosal h | Inflamed | SH3BGR    | protein_cc | chr21 | 40817781 | 40887433 | + | 1495  | 36.63007 | 0        | 0.399136 | 0.150409 | 2.653662 | 0.009277 | 0.048546 | 1 |
| ENSG0000 | mucosal h | Inflamed | AC006126  | lincRNA    | chr19 | 45741890 | 45748628 | - | 460   | 68.11695 | 0.026253 | -0.70835 | 0.266956 | -2.65345 | 0.009283 | 0.048563 | 1 |
| ENSG0000 | mucosal h | Inflamed | VWCE      | protein_cc | chr11 | 61025762 | 61062896 | - | 4869  | 21.24582 | 0.033413 | -0.60902 | 0.229524 | -2.65339 | 0.009284 | 0.048563 | 1 |
| ENSG0000 | mucosal h | Inflamed | RP11-592E | pseudoger  | chr10 | 51287081 | 51371070 | - | 2353  | 3.066826 | 0.369928 | 0.464889 | 0.175227 | 2.653069 | 0.009292 | 0.048597 | 1 |
| ENSG0000 | mucosal h | Inflamed | SPN       | protein_cc | chr16 | 29674300 | 29682187 | + | 7372  | 1147.675 | 0        | -0.51306 | 0.193396 | -2.6529  | 0.009297 | 0.04861  | 1 |
| ENSG0000 | mucosal h | Inflamed | HDAC11    | protein_cc | chr3  | 13521224 | 13547916 | + | 5273  | 1058.086 | 0        | 0.31743  | 0.11966  | 2.652771 | 0.0093   | 0.048618 | 1 |
| ENSG0000 | mucosal h | Inflamed | MTND6P2   | pseudoger  | chr21 | 45892778 | 45893622 | + | 482   | 2.038186 | 0.52506  | 0.459606 | 0.173281 | 2.652372 | 0.00931  | 0.048661 | 1 |
| ENSG0000 | mucosal h | Inflamed | DYNC1LI2  | protein_cc | chr16 | 66754796 | 66785701 | - | 8278  | 6026.549 | 0        | 0.528316 | 0.19922  | 2.651921 | 0.009322 | 0.048712 | 1 |
| ENSG0000 | mucosal h | Inflamed | RP1-224A  | lincRNA    | chr1  | 22427106 | 22427853 | + | 748   | 2.00716  | 0.486874 | 0.383045 | 0.144445 | 2.651833 | 0.009324 | 0.048715 | 1 |
| ENSG0000 | mucosal h | Inflamed | ANKS4B    | protein_cc | chr16 | 21244986 | 21263750 | + | 2936  | 1878.327 | 0.002387 | 0.767482 | 0.289435 | 2.651652 | 0.009329 | 0.048729 | 1 |
| ENSG0000 | mucosal h | Inflamed | RBP2      | protein_cc | chr3  | 1.39E+08 | 1.39E+08 | - | 845   | 136.494  | 0.186158 | 1.332236 | 0.502722 | 2.650045 | 0.00937  | 0.048936 | 1 |
| ENSG0000 | mucosal h | Inflamed | IRAK2     | protein_cc | chr3  | 10206549 | 10285427 | + | 3483  | 481.3103 | 0        | -0.58267 | 0.219906 | -2.64965 | 0.00938  | 0.04898  | 1 |
| ENSG0000 | mucosal h | Inflamed | CASK      | protein_cc | chrX  | 41374187 | 41782716 | - | 10547 | 2396.267 | 0        | 0.470892 | 0.177739 | 2.649341 | 0.009389 | 0.049012 | 1 |
| ENSG0000 | mucosal h | Inflamed | MMP19     | protein_cc | chr12 | 56229217 | 56236750 | - | 4672  | 1057.27  | 0        | -0.72677 | 0.274357 | -2.649   | 0.009397 | 0.049048 | 1 |
| ENSG0000 | mucosal h | Inflamed | GALK1     | protein_cc | chr17 | 73747675 | 73761792 | - | 2891  | 582.253  | 0        | -0.35321 | 0.133344 | -2.6489  | 0.0094   | 0.049052 | 1 |
| ENSG0000 | mucosal h | Inflamed | ZNF613    | protein_cc | chr19 | 52430400 | 52452012 | + | 3146  | 120.0597 | 0        | 0.469142 | 0.17714  | 2.648419 | 0.009412 | 0.049102 | 1 |
| ENSG0000 | mucosal h | Inflamed | ADCK2     | protein_cc | chr7  | 1.4E+08  | 1.4E+08  | + | 2913  | 1347.542 | 0        | 0.282774 | 0.106772 | 2.648389 | 0.009413 | 0.049102 | 1 |
| ENSG0000 | mucosal h | Inflamed | RLTPR     | protein_cc | chr16 | 67678822 | 67691472 | + | 7699  | 665.9308 | 0        | -0.69701 | 0.263203 | -2.64819 | 0.009418 | 0.04912  | 1 |
| ENSG0000 | mucosal h | Inflamed | ORAI1     | protein_cc | chr12 | 1.22E+08 | 1.22E+08 | + | 2263  | 995.1193 | 0        | -0.31341 | 0.118364 | -2.64789 | 0.009426 | 0.04915  | 1 |
| ENSG0000 | mucosal h | Inflamed | KB-1448A  | lincRNA    | chr8  | 97384093 | 97399666 | - | 1046  | 1.310263 | 0.689737 | 0.411679 | 0.155479 | 2.647816 | 0.009428 | 0.04915  | 1 |
| ENSG0000 | mucosal h | Inflamed | PDE6G     | protein_cc | chr17 | 79617489 | 79630142 | - | 1583  | 60.18138 | 0        | -0.52291 | 0.197507 | -2.64755 | 0.009435 | 0.049172 | 1 |
| ENSG0000 | mucosal h | Inflamed | 04-Sep    | protein_cc | chr17 | 56597611 | 56618179 | - | 8012  | 274.7064 | 0        | -0.54179 | 0.204642 | -2.64751 | 0.009436 | 0.049172 | 1 |
| ENSG0000 | mucosal h | Inflamed | RP11-107k | lincRNA    | chr18 | 24002959 | 24006065 | + | 900   | 1.040573 | 0.727924 | -0.36391 | 0.137472 | -2.64718 | 0.009445 | 0.049207 | 1 |
| ENSG0000 | mucosal h | Inflamed | KB-1572G  | processed  | chr22 | 23972805 | 23981128 | - | 1087  | 6.615752 | 0.221957 | 0.578906 | 0.218717 | 2.646821 | 0.009454 | 0.049246 | 1 |
| ENSG0000 | mucosal h | Inflamed | MYEF2     | protein_cc | chr15 | 48431625 | 48470714 | - | 9261  | 234.2196 | 0        | 0.685296 | 0.258923 | 2.646716 | 0.009457 | 0.049249 | 1 |
| ENSG0000 | mucosal h | Inflamed | PLXNA1    | protein_cc | chr3  | 1.27E+08 | 1.27E+08 | + | 10944 | 3696.902 | 0        | -0.45416 | 0.171596 | -2.64666 | 0.009458 | 0.049249 | 1 |
| ENSG0000 | mucosal h | Inflamed | MPZL2     | protein_cc | chr11 | 1.18E+08 | 1.18E+08 | - | 4753  | 1516.184 | 0        | 0.469013 | 0.177238 | 2.646227 | 0.009469 | 0.049298 | 1 |
| ENSG0000 | mucosal h | Inflamed | RP11-297M | lincRNA    | chr16 | 9847272  | 9851895  | - | 4624  | 12.01909 | 0.157518 | 0.725394 | 0.274139 | 2.646079 | 0.009473 | 0.049308 | 1 |
| ENSG0000 | mucosal h | Inflamed | ERMP1     | protein_cc | chr9  | 5765076  | 5833117  | - | 6528  | 2502.167 | 0        | 0.505261 | 0.190955 | 2.645969 | 0.009476 | 0.049313 | 1 |
| ENSG0000 | mucosal h | Inflamed | PCAT7     | antisense  | chr9  | 97317351 | 97330409 | + | 1164  | 32.90692 | 0.02864  | 0.611027 | 0.230939 | 2.645843 | 0.00948  | 0.049321 | 1 |
| ENSG0000 | mucosal h | Inflamed | PDZK1     | protein_cc | chr1  | 1.46E+08 | 1.46E+08 | + | 2347  | 63.65394 | 0.045346 | 1.148502 | 0.434178 | 2.645235 | 0.009495 | 0.049393 | 1 |
| ENSG0000 | mucosal h | Inflamed | CARD16    | protein_cc | chr11 | 1.05E+08 | 1.05E+08 | - | 1688  | 713.8974 | 0        | -0.47448 | 0.179383 | -2.64506 | 0.0095   | 0.049407 | 1 |
| ENSG0000 | mucosal h | Inflamed | CTD-2192J | lincRNA    | chr19 | 12793507 | 12798093 | - | 635   | 2.606205 | 0.381862 | 0.413587 | 0.156416 | 2.64415  | 0.009524 | 0.049522 | 1 |
| ENSG0000 | mucosal h | Inflamed | DLG3      | protein_cc | chrX  | 69664711 | 69725337 | + | 7841  | 3265.27  | 0        | 0.458332 | 0.17335  | 2.643975 | 0.009528 | 0.049526 | 1 |
| ENSG0000 | mucosal h | Inflamed | RP11-128C | pseudoger  | chr5  | 70398725 | 70424580 | - | 2851  | 18.28162 | 0.059666 | 0.597196 | 0.225871 | 2.643972 | 0.009529 | 0.049526 | 1 |
| ENSG0000 | mucosal h | Inflamed | PRSS22    | protein_cc | chr16 | 2902728  | 2908171  | - | 2387  | 576.2076 | 0        | -0.95137 | 0.359853 | -2.64378 | 0.009533 | 0.049542 | 1 |
| ENSG0000 | mucosal h | Inflamed | HKR1      | protein_cc | chr19 | 37803739 | 37860267 | + | 7203  | 895.1169 | 0        | 0.402082 | 0.152093 | 2.643651 | 0.009537 | 0.049547 | 1 |

|          |           |          |            |              |       |          |          |   |       |          |          |          |          |          |          |          |   |
|----------|-----------|----------|------------|--------------|-------|----------|----------|---|-------|----------|----------|----------|----------|----------|----------|----------|---|
| ENSG0000 | mucosal h | Inflamed | PSMB6      | protein_cc   | chr17 | 4699439  | 4701790  | + | 1420  | 1897.647 | 0        | -0.27144 | 0.102679 | -2.64361 | 0.009538 | 0.049547 | 1 |
| ENSG0000 | mucosal h | Inflamed | CES3       | protein_cc   | chr16 | 66995140 | 67009051 | + | 4935  | 5811.332 | 0        | 0.846103 | 0.320096 | 2.643277 | 0.009547 | 0.049581 | 1 |
| ENSG0000 | mucosal h | Inflamed | GSS        | protein_cc   | chr20 | 33516236 | 33543620 | - | 2325  | 2760.508 | 0        | 0.252294 | 0.09545  | 2.643212 | 0.009549 | 0.049581 | 1 |
| ENSG0000 | mucosal h | Inflamed | RP11-484E  | pseudoger    | chr11 | 43487942 | 43488421 | + | 480   | 2.823389 | 0.412888 | 0.502174 | 0.189997 | 2.643054 | 0.009553 | 0.049593 | 1 |
| ENSG0000 | mucosal h | Inflamed | NUDT9      | protein_cc   | chr4  | 88343734 | 88380606 | + | 3184  | 837.9212 | 0        | 0.288612 | 0.109216 | 2.642577 | 0.009565 | 0.049649 | 1 |
| ENSG0000 | mucosal h | Inflamed | COX5A      | protein_cc   | chr15 | 75212132 | 75230509 | - | 1411  | 8392.408 | 0        | 0.295564 | 0.111879 | 2.641807 | 0.009586 | 0.049744 | 1 |
| ENSG0000 | mucosal h | Inflamed | SLC22A11   | protein_cc   | chr11 | 64323098 | 64340347 | + | 5222  | 4.880668 | 0.315036 | 0.610418 | 0.231076 | 2.641627 | 0.00959  | 0.049759 | 1 |
| ENSG0000 | mucosal h | Inflamed | TMEM154    | protein_cc   | chr4  | 1.54E+08 | 1.54E+08 | - | 11573 | 410.8067 | 0        | -0.75761 | 0.286818 | -2.64142 | 0.009596 | 0.049778 | 1 |
| ENSG0000 | mucosal h | Inflamed | ISCA1      | protein_cc   | chr9  | 88879461 | 88897676 | - | 3273  | 849.9236 | 0        | 0.279866 | 0.105994 | 2.640399 | 0.009623 | 0.049908 | 1 |
| ENSG0000 | mucosal h | Inflamed | RN7SL689I  | misc_RNA     | chr5  | 1.22E+08 | 1.22E+08 | - | 295   | 10.41527 | 0.052506 | 0.53574  | 0.202914 | 2.640233 | 0.009627 | 0.049912 | 1 |
| ENSG0000 | mucosal h | Inflamed | COPE       | protein_cc   | chr19 | 19010323 | 19030206 | - | 2885  | 4515.654 | 0        | -0.22921 | 0.086815 | -2.64022 | 0.009627 | 0.049912 | 1 |
| ENSG0000 | mucosal h | Inflamed | LGALS4     | protein_cc   | chr19 | 39292311 | 39304004 | - | 2645  | 89867.48 | 0        | 0.797637 | 0.30213  | 2.640041 | 0.009632 | 0.049924 | 1 |
| ENSG0000 | mucosal h | Inflamed | ANO4       | protein_cc   | chr12 | 1.01E+08 | 1.02E+08 | + | 4997  | 10.10263 | 0.078759 | 0.629589 | 0.238481 | 2.639996 | 0.009633 | 0.049924 | 1 |
| ENSG0000 | mucosal h | Inflamed | RP11-179E  | antisense    | chr10 | 1.03E+08 | 1.03E+08 | - | 1637  | 13.68258 | 0.004773 | 0.40309  | 0.152699 | 2.639769 | 0.009639 | 0.049945 | 1 |
| ENSG0000 | mucosal h | Inflamed | PDK1       | protein_cc   | chr2  | 1.73E+08 | 1.73E+08 | + | 15115 | 1633.575 | 0        | -0.65837 | 0.249415 | -2.63967 | 0.009642 | 0.049949 | 1 |
| ENSG0000 | mucosal h | Inflamed | SLC25A5-A  | processed_ch | X     | 1.19E+08 | 1.19E+08 | - | 3065  | 32.642   | 0        | 0.308372 | 0.116834 | 2.639409 | 0.009649 | 0.049975 | 1 |
| ENSG0000 | mucosal h | Inflamed | LETMD1     | protein_cc   | chr12 | 51441745 | 51454207 | + | 4400  | 1781.241 | 0        | 0.268922 | 0.101894 | 2.639242 | 0.009653 | 0.049983 | 1 |
| ENSG0000 | mucosal h | Inflamed | RN7SL767I  | misc_RNA     | chr3  | 1.13E+08 | 1.13E+08 | + | 277   | 1.088305 | 0.720764 | 0.335689 | 0.127193 | 2.639204 | 0.009654 | 0.049983 | 1 |
| ENSG0000 | mucosal h | Inflamed | CCDC24     | protein_cc   | chr1  | 44457031 | 44462200 | + | 3554  | 427.8377 | 0        | 0.331883 | 0.125823 | 2.637692 | 0.009695 | 0.050182 | 1 |
| ENSG0000 | mucosal h | Inflamed | RP11-711M  | lincRNA      | chr2  | 74213653 | 74220867 | + | 710   | 34.46778 | 0.026253 | 0.493723 | 0.187215 | 2.637204 | 0.009708 | 0.050239 | 1 |
| ENSG0000 | mucosal h | Inflamed | PIK3R6     | protein_cc   | chr17 | 8706041  | 8770994  | - | 3563  | 254.3389 | 0        | -0.42284 | 0.160347 | -2.63706 | 0.009712 | 0.050248 | 1 |
| ENSG0000 | mucosal h | Inflamed | SIX1       | protein_cc   | chr14 | 61110133 | 61124977 | - | 5430  | 12.37947 | 0.202864 | -0.80947 | 0.306968 | -2.637   | 0.009713 | 0.050248 | 1 |
| ENSG0000 | mucosal h | Inflamed | RP1-128M   | pseudoger    | chr12 | 1.12E+08 | 1.12E+08 | - | 247   | 0.899761 | 0.775656 | 0.316324 | 0.11997  | 2.636691 | 0.009721 | 0.050281 | 1 |
| ENSG0000 | mucosal h | Inflamed | RP11-762I  | sense_intr   | chr12 | 56155334 | 56156412 | - | 529   | 12.86158 | 0.105012 | 0.651309 | 0.247027 | 2.636593 | 0.009724 | 0.050284 | 1 |
| ENSG0000 | mucosal h | Inflamed | hsa-mir-45 | miRNA        | chr14 | 1.06E+08 | 1.06E+08 | - | 60    | 32.05012 | 0.054893 | -0.86198 | 0.326939 | -2.63651 | 0.009726 | 0.050286 | 1 |
| ENSG0000 | mucosal h | Inflamed | FAM134A    | protein_cc   | chr2  | 2.2E+08  | 2.2E+08  | + | 5689  | 5043.516 | 0        | 0.231125 | 0.087698 | 2.635464 | 0.009754 | 0.050421 | 1 |
| ENSG0000 | mucosal h | Inflamed | QARS       | protein_cc   | chr3  | 49133365 | 49142553 | - | 4576  | 9419.379 | 0        | 0.298913 | 0.11344  | 2.634986 | 0.009767 | 0.050471 | 1 |
| ENSG0000 | mucosal h | Inflamed | HRK        | protein_cc   | chr12 | 1.17E+08 | 1.17E+08 | - | 6853  | 23.47971 | 0.052506 | 0.787309 | 0.298794 | 2.634957 | 0.009768 | 0.050471 | 1 |
| ENSG0000 | mucosal h | Inflamed | ZNF252P-1  | antisense    | chr8  | 1.46E+08 | 1.46E+08 | + | 3236  | 28.93079 | 0.026253 | 0.589114 | 0.223663 | 2.633936 | 0.009795 | 0.050603 | 1 |
| ENSG0000 | mucosal h | Inflamed | TDRD3      | protein_cc   | chr13 | 60970591 | 61148012 | + | 4112  | 377.3031 | 0        | 0.432783 | 0.164321 | 2.633775 | 0.0098   | 0.050616 | 1 |
| ENSG0000 | mucosal h | Inflamed | TGFB3L     | protein_cc   | chr19 | 7981030  | 7983982  | + | 1516  | 8.546539 | 0.040573 | -0.47809 | 0.181531 | -2.63364 | 0.009803 | 0.050624 | 1 |
| ENSG0000 | mucosal h | Inflamed | PGBD2      | protein_cc   | chr1  | 2.49E+08 | 2.49E+08 | + | 3772  | 295.3484 | 0        | 0.508921 | 0.193288 | 2.632972 | 0.009821 | 0.050708 | 1 |
| ENSG0000 | mucosal h | Inflamed | RP11-13N   | lincRNA      | chr18 | 19210099 | 19213485 | + | 745   | 5.26253  | 0.159905 | 0.488046 | 0.185395 | 2.63247  | 0.009835 | 0.050768 | 1 |
| ENSG0000 | mucosal h | Inflamed | RP11-290C  | antisense    | chr12 | 10019626 | 10022407 | + | 719   | 1.033413 | 0.735084 | -0.32298 | 0.122712 | -2.63199 | 0.009848 | 0.050825 | 1 |
| ENSG0000 | mucosal h | Inflamed | FANCG      | protein_cc   | chr9  | 35073832 | 35080013 | - | 3614  | 678.5155 | 0        | -0.25568 | 0.097159 | -2.63161 | 0.009858 | 0.050856 | 1 |
| ENSG0000 | mucosal h | Inflamed | AL512652   | pseudoger    | chr13 | 21286570 | 21288285 | + | 1714  | 2.052506 | 0.486874 | 0.395497 | 0.150289 | 2.631583 | 0.009859 | 0.050856 | 1 |
| ENSG0000 | mucosal h | Inflamed | PAFAH2     | protein_cc   | chr1  | 26286258 | 26324648 | - | 3835  | 2027.525 | 0        | 0.376399 | 0.143033 | 2.631551 | 0.00986  | 0.050856 | 1 |
| ENSG0000 | mucosal h | Inflamed | MX1        | protein_cc   | chr21 | 42792231 | 42831141 | + | 8611  | 1939.215 | 0        | -0.49884 | 0.189569 | -2.63144 | 0.009863 | 0.050861 | 1 |
| ENSG0000 | mucosal h | Inflamed | KIAA1239   | protein_cc   | chr4  | 37245842 | 37451087 | + | 8325  | 28.64678 | 0.138425 | 1.003324 | 0.381306 | 2.631287 | 0.009867 | 0.050873 | 1 |
| ENSG0000 | mucosal h | Inflamed | CTD-2083E  | sense_ove    | chr5  | 195893   | 196456   | + | 564   | 2.859189 | 0.369928 | -0.50753 | 0.19289  | -2.6312  | 0.009869 | 0.050875 | 1 |

|          |           |          |           |            |       |          |          |   |       |          |          |          |          |          |          |          |   |
|----------|-----------|----------|-----------|------------|-------|----------|----------|---|-------|----------|----------|----------|----------|----------|----------|----------|---|
| ENSG0000 | mucosal h | Inflamed | PPP1R1B   | protein_cc | chr17 | 37782993 | 37792879 | + | 4554  | 10267.13 | 0        | 0.730678 | 0.277721 | 2.630974 | 0.009875 | 0.050897 | 1 |
| ENSG0000 | mucosal h | Inflamed | ABCC6     | protein_cc | chr16 | 16242785 | 16317379 | - | 7559  | 627.2625 | 0        | 0.637535 | 0.24233  | 2.630859 | 0.009879 | 0.050903 | 1 |
| ENSG0000 | mucosal h | Inflamed | S100A4    | protein_cc | chr1  | 1.54E+08 | 1.54E+08 | - | 1025  | 1810.554 | 0        | -0.62584 | 0.237896 | -2.63074 | 0.009882 | 0.050903 | 1 |
| ENSG0000 | mucosal h | Inflamed | HOXB9     | protein_cc | chr17 | 46698518 | 46703839 | - | 2705  | 3431.938 | 0        | 0.719713 | 0.273581 | 2.630711 | 0.009883 | 0.050903 | 1 |
| ENSG0000 | mucosal h | Inflamed | PCDHB9    | pseudoger  | chr5  | 1.41E+08 | 1.41E+08 | + | 4217  | 25.34129 | 0.026253 | 0.484014 | 0.183998 | 2.630537 | 0.009887 | 0.050918 | 1 |
| ENSG0000 | mucosal h | Inflamed | RP11-796E | lincRNA    | chr2  | 1.75E+08 | 1.75E+08 | + | 317   | 1.789976 | 0.594272 | 0.358709 | 0.136368 | 2.630441 | 0.00989  | 0.050921 | 1 |
| ENSG0000 | mucosal h | Inflamed | RP4-621B1 | lincRNA    | chr1  | 92654794 | 92656264 | + | 1293  | 2.293556 | 0.455847 | 0.412056 | 0.156689 | 2.629767 | 0.009908 | 0.050999 | 1 |
| ENSG0000 | mucosal h | Inflamed | BZRAP1-A' | antisense  | chr17 | 56402811 | 56493127 | + | 3601  | 175.537  | 0.002387 | -0.64378 | 0.244817 | -2.62965 | 0.009911 | 0.050999 | 1 |
| ENSG0000 | mucosal h | Inflamed | RP13-15M  | pseudoger  | chr1  | 9636485  | 9637043  | + | 559   | 15.44391 | 0.107399 | 0.647994 | 0.246427 | 2.629558 | 0.009914 | 0.050999 | 1 |
| ENSG0000 | mucosal h | Inflamed | GALM      | protein_cc | chr2  | 38893052 | 38968379 | + | 2790  | 1985.055 | 0        | 0.356131 | 0.135434 | 2.629557 | 0.009914 | 0.050999 | 1 |
| ENSG0000 | mucosal h | Inflamed | TFPI      | protein_cc | chr2  | 1.88E+08 | 1.88E+08 | - | 11714 | 580.8353 | 0        | -0.60376 | 0.229608 | -2.62953 | 0.009915 | 0.050999 | 1 |
| ENSG0000 | mucosal h | Inflamed | ST18      | protein_cc | chr8  | 53023399 | 53373519 | - | 14396 | 22.9284  | 0.02148  | 0.608294 | 0.231398 | 2.62878  | 0.009935 | 0.051087 | 1 |
| ENSG0000 | mucosal h | Inflamed | RP11-256L | antisense  | chr12 | 96390299 | 96405267 | + | 862   | 4.966587 | 0.50358  | -0.77271 | 0.293944 | -2.62876 | 0.009936 | 0.051087 | 1 |
| ENSG0000 | mucosal h | Inflamed | TTC38     | protein_cc | chr22 | 46663858 | 46689905 | + | 3578  | 4836.986 | 0        | 0.388685 | 0.147873 | 2.628505 | 0.009943 | 0.05111  | 1 |
| ENSG0000 | mucosal h | Inflamed | DGCR5     | antisense  | chr22 | 18958027 | 19018755 | + | 8670  | 4.064439 | 0.379475 | -0.59299 | 0.225603 | -2.62846 | 0.009944 | 0.05111  | 1 |
| ENSG0000 | mucosal h | Inflamed | THG1L     | protein_cc | chr5  | 1.57E+08 | 1.57E+08 | + | 3220  | 426.3341 | 0        | 0.311349 | 0.118466 | 2.628163 | 0.009952 | 0.051141 | 1 |
| ENSG0000 | mucosal h | Inflamed | EFEMP2    | protein_cc | chr11 | 65633912 | 65641063 | - | 5397  | 1376.797 | 0        | -0.52086 | 0.19819  | -2.62808 | 0.009954 | 0.051143 | 1 |
| ENSG0000 | mucosal h | Inflamed | DHFRP1    | pseudoger  | chr18 | 23749724 | 23751313 | - | 1590  | 3.171838 | 0.27685  | 0.395025 | 0.150319 | 2.627914 | 0.009959 | 0.051156 | 1 |
| ENSG0000 | mucosal h | Inflamed | RP11-61A1 | lincRNA    | chr16 | 66923072 | 66924996 | + | 1925  | 216.8258 | 0        | 0.354489 | 0.134925 | 2.627298 | 0.009976 | 0.051232 | 1 |
| ENSG0000 | mucosal h | Inflamed | KIRREL    | protein_cc | chr1  | 1.58E+08 | 1.58E+08 | + | 7872  | 2254.928 | 0        | -0.57132 | 0.217501 | -2.62673 | 0.009991 | 0.051302 | 1 |
| ENSG0000 | mucosal h | Inflamed | TNFSF13B  | protein_cc | chr13 | 1.09E+08 | 1.09E+08 | + | 3059  | 306.4344 | 0        | -0.67146 | 0.255642 | -2.62656 | 0.009996 | 0.051316 | 1 |
| ENSG0000 | mucosal h | Inflamed | ERCC6     | protein_cc | chr10 | 50663414 | 50747584 | - | 8840  | 337.2387 | 0        | 0.514376 | 0.195856 | 2.626301 | 0.010003 | 0.051342 | 1 |
| ENSG0000 | mucosal h | Inflamed | RP11-285E | lincRNA    | chr17 | 75260262 | 75260858 | - | 597   | 3.252983 | 0.362768 | 0.498275 | 0.189744 | 2.626045 | 0.01001  | 0.051357 | 1 |
| ENSG0000 | mucosal h | Inflamed | RP11-357F | lincRNA    | chr17 | 46713285 | 46724385 | - | 1596  | 1037.549 | 0        | 0.695897 | 0.265001 | 2.626019 | 0.010011 | 0.051357 | 1 |
| ENSG0000 | mucosal h | Inflamed | SLC30A10  | protein_cc | chr1  | 2.2E+08  | 2.2E+08  | - | 5770  | 837.9093 | 0.011933 | 1.342209 | 0.511126 | 2.625986 | 0.010012 | 0.051357 | 1 |
| ENSG0000 | mucosal h | Inflamed | LRP5L     | protein_cc | chr22 | 25747385 | 25801344 | - | 4555  | 350.9141 | 0        | 0.502845 | 0.191495 | 2.625891 | 0.010014 | 0.05136  | 1 |
| ENSG0000 | mucosal h | Inflamed | RP11-405C | sense_intr | chr6  | 7183316  | 7185520  | + | 1676  | 5.112172 | 0.229117 | 0.565126 | 0.215233 | 2.625651 | 0.010021 | 0.051384 | 1 |
| ENSG0000 | mucosal h | Inflamed | FAM65A    | protein_cc | chr16 | 67552321 | 67580691 | + | 6730  | 2058.484 | 0        | -0.5551  | 0.211435 | -2.62541 | 0.010027 | 0.051404 | 1 |
| ENSG0000 | mucosal h | Inflamed | MRPS22    | protein_cc | chr3  | 1.39E+08 | 1.39E+08 | + | 5382  | 769.4296 | 0        | 0.337773 | 0.128661 | 2.625298 | 0.01003  | 0.051404 | 1 |
| ENSG0000 | mucosal h | Inflamed | CTB-114C7 | lincRNA    | chr5  | 1.7E+08  | 1.7E+08  | + | 985   | 2.937947 | 0.369928 | -0.43841 | 0.166996 | -2.62529 | 0.010031 | 0.051404 | 1 |
| ENSG0000 | mucosal h | Inflamed | HIST1H4E  | protein_cc | chr6  | 26204858 | 26206266 | + | 1409  | 22.44391 | 0.009547 | 0.716462 | 0.272923 | 2.62514  | 0.010035 | 0.051416 | 1 |
| ENSG0000 | mucosal h | Inflamed | INSM1     | protein_cc | chr20 | 20348765 | 20351590 | + | 2826  | 147.4893 | 0.004773 | 0.735631 | 0.280234 | 2.625059 | 0.010037 | 0.051417 | 1 |
| ENSG0000 | mucosal h | Inflamed | HOXB3     | protein_cc | chr17 | 46626232 | 46682274 | - | 7456  | 1391.26  | 0        | 0.582866 | 0.222061 | 2.624805 | 0.010044 | 0.051443 | 1 |
| ENSG0000 | mucosal h | Inflamed | OSGEPL1-7 | antisense  | chr2  | 1.91E+08 | 1.91E+08 | + | 860   | 9.429594 | 0.042959 | 0.437056 | 0.166522 | 2.624621 | 0.010049 | 0.051459 | 1 |
| ENSG0000 | mucosal h | Inflamed | IGF2      | protein_cc | chr11 | 2150342  | 2170833  | - | 6979  | 572.8568 | 0        | -0.73734 | 0.280949 | -2.62448 | 0.010053 | 0.051459 | 1 |
| ENSG0000 | mucosal h | Inflamed | MIRLET7I  | miRNA      | chr12 | 62997466 | 62997550 | + | 85    | 1.591885 | 0.632458 | -0.42192 | 0.160763 | -2.62448 | 0.010053 | 0.051459 | 1 |
| ENSG0000 | mucosal h | Inflamed | RP11-57H1 | antisense  | chr10 | 1.15E+08 | 1.15E+08 | - | 460   | 7.914081 | 0.102625 | 0.568114 | 0.216506 | 2.624008 | 0.010066 | 0.051515 | 1 |
| ENSG0000 | mucosal h | Inflamed | CDCA5     | protein_cc | chr11 | 64833772 | 64851636 | - | 3925  | 727.2506 | 0        | -0.33605 | 0.128079 | -2.62381 | 0.010071 | 0.051533 | 1 |
| ENSG0000 | mucosal h | Inflamed | RP11-645C | lincRNA    | chr16 | 21805416 | 21807080 | - | 1665  | 29.54654 | 0.054893 | 0.75075  | 0.286196 | 2.623197 | 0.010088 | 0.05161  | 1 |
| ENSG0000 | mucosal h | Inflamed | ZNF443    | protein_cc | chr19 | 12540521 | 12551926 | - | 2753  | 137.6516 | 0.002387 | 0.654852 | 0.249656 | 2.623019 | 0.010093 | 0.051618 | 1 |

|          |           |          |           |            |       |          |          |   |       |          |          |          |          |          |          |          |   |
|----------|-----------|----------|-----------|------------|-------|----------|----------|---|-------|----------|----------|----------|----------|----------|----------|----------|---|
| ENSG0000 | mucosal h | Inflamed | ATP2A1    | protein_cc | chr16 | 28889726 | 28915830 | + | 4587  | 40.43675 | 0.023866 | 0.553303 | 0.210943 | 2.622997 | 0.010094 | 0.051618 | 1 |
| ENSG0000 | mucosal h | Inflamed | DAD1      | protein_cc | chr14 | 23033805 | 23058175 | - | 808   | 2610.547 | 0        | -0.34911 | 0.133104 | -2.62285 | 0.010098 | 0.051629 | 1 |
| ENSG0000 | mucosal h | Inflamed | PGM5P1    | pseudoger  | chr9  | 68741234 | 68809906 | - | 2303  | 2.634845 | 0.451074 | 0.548326 | 0.209068 | 2.622719 | 0.010102 | 0.051637 | 1 |
| ENSG0000 | mucosal h | Inflamed | RP3-400B1 | lincRNA    | chr6  | 4136306  | 4157619  | + | 2277  | 21.43675 | 0.038186 | 0.668171 | 0.254795 | 2.62239  | 0.010111 | 0.051648 | 1 |
| ENSG0000 | mucosal h | Inflamed | SST       | protein_cc | chr3  | 1.87E+08 | 1.87E+08 | - | 618   | 651.2936 | 0.002387 | 1.081723 | 0.412511 | 2.622288 | 0.010114 | 0.051648 | 1 |
| ENSG0000 | mucosal h | Inflamed | NPAS1     | protein_cc | chr19 | 47523077 | 47549033 | + | 2582  | 34.69928 | 0        | -0.3535  | 0.134811 | -2.62223 | 0.010115 | 0.051648 | 1 |
| ENSG0000 | mucosal h | Inflamed | TRIM47    | protein_cc | chr17 | 73870242 | 73874656 | - | 3142  | 2213.122 | 0        | -0.29111 | 0.111018 | -2.62222 | 0.010115 | 0.051648 | 1 |
| ENSG0000 | mucosal h | Inflamed | RP11-544L | antisense  | chr6  | 1.14E+08 | 1.14E+08 | + | 2255  | 2.861575 | 0.46778  | 0.535669 | 0.204288 | 2.622127 | 0.010118 | 0.051648 | 1 |
| ENSG0000 | mucosal h | Inflamed | ALOX15B   | protein_cc | chr17 | 7942335  | 7952452  | + | 3028  | 115.7709 | 0.002387 | -0.79816 | 0.304406 | -2.62203 | 0.010121 | 0.051648 | 1 |
| ENSG0000 | mucosal h | Inflamed | RP11-103J | lincRNA    | chr4  | 37003438 | 37022330 | + | 2471  | 2.959427 | 0.5179   | 0.44442  | 0.169496 | 2.622016 | 0.010121 | 0.051648 | 1 |
| ENSG0000 | mucosal h | Inflamed | RAB24     | protein_cc | chr5  | 1.77E+08 | 1.77E+08 | - | 2065  | 539.5442 | 0        | -0.37399 | 0.142633 | -2.62201 | 0.010121 | 0.051648 | 1 |
| ENSG0000 | mucosal h | Inflamed | RP4-756H  | sense_intr | chr7  | 66119525 | 66134842 | + | 938   | 29.11217 | 0.011933 | 0.432131 | 0.16481  | 2.622003 | 0.010121 | 0.051648 | 1 |
| ENSG0000 | mucosal h | Inflamed | COL5A2    | protein_cc | chr2  | 1.9E+08  | 1.9E+08  | - | 7156  | 6239.294 | 0        | -0.70342 | 0.26829  | -2.62185 | 0.010126 | 0.051661 | 1 |
| ENSG0000 | mucosal h | Inflamed | DNAH8     | protein_cc | chr6  | 38683117 | 38998301 | + | 15051 | 13.93079 | 0.190931 | -0.7707  | 0.294097 | -2.62056 | 0.010161 | 0.051833 | 1 |
| ENSG0000 | mucosal h | Inflamed | AOX1      | protein_cc | chr2  | 2.01E+08 | 2.02E+08 | + | 5552  | 165.9523 | 0.011933 | -0.97016 | 0.370252 | -2.62028 | 0.010169 | 0.051855 | 1 |
| ENSG0000 | mucosal h | Inflamed | RP11-383J | lincRNA    | chr8  | 1.25E+08 | 1.25E+08 | - | 2188  | 132.5012 | 0.002387 | 0.529701 | 0.202156 | 2.62026  | 0.01017  | 0.051855 | 1 |
| ENSG0000 | mucosal h | Inflamed | RP11-1007 | lincRNA    | chr15 | 72757469 | 72758603 | - | 1135  | 13.25537 | 0.081146 | 0.603027 | 0.230197 | 2.619608 | 0.010188 | 0.051935 | 1 |
| ENSG0000 | mucosal h | Inflamed | PXMP4     | protein_cc | chr20 | 32294512 | 32308125 | - | 1771  | 383.2482 | 0        | 0.338405 | 0.129192 | 2.619388 | 0.010194 | 0.051935 | 1 |
| ENSG0000 | mucosal h | Inflamed | RP11-416A | pseudoger  | chr12 | 51518411 | 51519164 | - | 754   | 10.86635 | 0.119332 | 0.580091 | 0.221464 | 2.619352 | 0.010195 | 0.051935 | 1 |
| ENSG0000 | mucosal h | Inflamed | GNAS-AS1  | antisense  | chr20 | 57393974 | 57425958 | - | 2379  | 4.50358  | 0.174224 | 0.440348 | 0.168115 | 2.619319 | 0.010196 | 0.051935 | 1 |
| ENSG0000 | mucosal h | Inflamed | CLRN3     | protein_cc | chr10 | 1.3E+08  | 1.3E+08  | - | 1152  | 1802.494 | 0        | 0.740253 | 0.282616 | 2.619287 | 0.010197 | 0.051935 | 1 |
| ENSG0000 | mucosal h | Inflamed | RP11-543I | lincRNA    | chr1  | 48154135 | 48169055 | + | 815   | 2.062053 | 0.568019 | 0.509099 | 0.194367 | 2.619271 | 0.010197 | 0.051935 | 1 |
| ENSG0000 | mucosal h | Inflamed | EFNA3     | protein_cc | chr1  | 1.55E+08 | 1.55E+08 | + | 2098  | 303.5871 | 0        | 0.516097 | 0.197055 | 2.619046 | 0.010204 | 0.051957 | 1 |
| ENSG0000 | mucosal h | Inflamed | HLA-DRB6  | pseudoger  | chr6  | 32520490 | 32527799 | - | 1326  | 278.3484 | 0.026253 | -0.54812 | 0.209295 | -2.61888 | 0.010208 | 0.051962 | 1 |
| ENSG0000 | mucosal h | Inflamed | RAB36     | protein_cc | chr22 | 23487513 | 23506537 | + | 4107  | 180.5346 | 0        | -0.50347 | 0.192247 | -2.61887 | 0.010209 | 0.051962 | 1 |
| ENSG0000 | mucosal h | Inflamed | MIR559    | miRNA      | chr2  | 47604814 | 47604909 | + | 96    | 13.86396 | 0.136038 | 0.717666 | 0.274053 | 2.61871  | 0.010213 | 0.051963 | 1 |
| ENSG0000 | mucosal h | Inflamed | ANKRD20A  | protein_cc | chr9  | 67926761 | 67969840 | + | 3511  | 1.341289 | 0.653938 | 0.324391 | 0.123877 | 2.618665 | 0.010214 | 0.051963 | 1 |
| ENSG0000 | mucosal h | Inflamed | CTB-13F3  | antisense  | chr7  | 1.08E+08 | 1.08E+08 | + | 625   | 4.169451 | 0.236277 | 0.48929  | 0.186848 | 2.618651 | 0.010215 | 0.051963 | 1 |
| ENSG0000 | mucosal h | Inflamed | ZNF137P   | pseudoger  | chr19 | 53091758 | 53100660 | + | 2091  | 123.3532 | 0.019093 | 0.733407 | 0.280108 | 2.618304 | 0.010224 | 0.052003 | 1 |
| ENSG0000 | mucosal h | Inflamed | SLC25A22  | protein_cc | chr11 | 790475   | 798316   | - | 4539  | 1227.048 | 0        | -0.35071 | 0.133957 | -2.61808 | 0.010231 | 0.052022 | 1 |
| ENSG0000 | mucosal h | Inflamed | RP11-97N  | pseudoger  | chrX  | 1.35E+08 | 1.35E+08 | - | 1134  | 1.642005 | 0.577566 | 0.360768 | 0.137801 | 2.618029 | 0.010232 | 0.052022 | 1 |
| ENSG0000 | mucosal h | Inflamed | RPS18P9   | pseudoger  | chr6  | 1.5E+08  | 1.5E+08  | + | 460   | 28.26492 | 0        | 0.324296 | 0.123875 | 2.617927 | 0.010235 | 0.052026 | 1 |
| ENSG0000 | mucosal h | Inflamed | C15orf27  | protein_cc | chr15 | 76352178 | 76521462 | + | 5265  | 28.59189 | 0.01432  | -0.64499 | 0.246391 | -2.61774 | 0.01024  | 0.052043 | 1 |
| ENSG0000 | mucosal h | Inflamed | ME1       | protein_cc | chr6  | 83920108 | 84140797 | - | 3378  | 1287.122 | 0        | -0.61785 | 0.236057 | -2.61735 | 0.010251 | 0.052087 | 1 |
| ENSG0000 | mucosal h | Inflamed | AC005224  | antisense  | chr17 | 14113805 | 14121239 | + | 1537  | 22.6611  | 0.016706 | 0.59033  | 0.225561 | 2.617163 | 0.010256 | 0.052105 | 1 |
| ENSG0000 | mucosal h | Inflamed | TMEM173   | protein_cc | chr5  | 1.39E+08 | 1.39E+08 | - | 3850  | 3499.179 | 0        | -0.36506 | 0.139535 | -2.61626 | 0.010282 | 0.052223 | 1 |
| ENSG0000 | mucosal h | Inflamed | PI4K2A    | protein_cc | chr10 | 99344131 | 99436191 | + | 4864  | 1004.535 | 0        | -0.22406 | 0.085653 | -2.61596 | 0.01029  | 0.052257 | 1 |
| ENSG0000 | mucosal h | Inflamed | RP11-359E | antisense  | chr10 | 88509511 | 88516055 | - | 6545  | 88.53461 | 0.00716  | 0.470543 | 0.179883 | 2.615824 | 0.010294 | 0.052261 | 1 |
| ENSG0000 | mucosal h | Inflamed | AC005220  | antisense  | chr20 | 52556699 | 52559047 | + | 884   | 1.902148 | 0.563246 | -0.42681 | 0.163166 | -2.61578 | 0.010295 | 0.052261 | 1 |
| ENSG0000 | mucosal h | Inflamed | RUSC1     | protein_cc | chr1  | 1.55E+08 | 1.55E+08 | + | 5427  | 2860.601 | 0        | 0.24553  | 0.09388  | 2.615354 | 0.010307 | 0.052313 | 1 |

|          |           |          |           |                  |          |          |   |       |          |          |          |          |          |          |          |   |
|----------|-----------|----------|-----------|------------------|----------|----------|---|-------|----------|----------|----------|----------|----------|----------|----------|---|
| ENSG0000 | mucosal h | Inflamed | TRAPPC10  | protein_cc chr21 | 45432200 | 45526433 | + | 11941 | 4209.05  | 0        | 0.369217 | 0.141192 | 2.615002 | 0.010317 | 0.052353 | 1 |
| ENSG0000 | mucosal h | Inflamed | FAM162B   | protein_cc chr6  | 1.17E+08 | 1.17E+08 | - | 1033  | 30.91885 | 0.00716  | -0.57913 | 0.221474 | -2.61487 | 0.010321 | 0.052362 | 1 |
| ENSG0000 | mucosal h | Inflamed | C3orf83   | protein_cc chr3  | 12556433 | 12602558 | - | 1829  | 89.59666 | 0.009547 | 0.550664 | 0.210604 | 2.614684 | 0.010326 | 0.052378 | 1 |
| ENSG0000 | mucosal h | Inflamed | DCTPP1    | protein_cc chr16 | 30434940 | 30441396 | - | 1581  | 1650.332 | 0        | 0.321362 | 0.12291  | 2.614612 | 0.010328 | 0.052378 | 1 |
| ENSG0000 | mucosal h | Inflamed | ORAOV1    | protein_cc chr11 | 69467844 | 69490184 | - | 7873  | 847.6802 | 0        | 0.341198 | 0.130503 | 2.614477 | 0.010332 | 0.052379 | 1 |
| ENSG0000 | mucosal h | Inflamed | OTUB2     | protein_cc chr14 | 94492675 | 94515276 | + | 4252  | 320.1217 | 0        | -0.4685  | 0.179195 | -2.61446 | 0.010332 | 0.052379 | 1 |
| ENSG0000 | mucosal h | Inflamed | CTD-2292I | lincRNA chr14    | 20728639 | 20732467 | - | 3829  | 40.92363 | 0.023866 | 0.673755 | 0.257772 | 2.613762 | 0.010352 | 0.052465 | 1 |
| ENSG0000 | mucosal h | Inflamed | PRKAG2    | protein_cc chr7  | 1.51E+08 | 1.52E+08 | - | 6740  | 1016.895 | 0        | 0.266545 | 0.101979 | 2.613724 | 0.010353 | 0.052465 | 1 |
| ENSG0000 | mucosal h | Inflamed | NCR2      | protein_cc chr6  | 41303393 | 41318625 | + | 1219  | 3.918854 | 0.429594 | 0.572088 | 0.218895 | 2.61353  | 0.010359 | 0.052483 | 1 |
| ENSG0000 | mucosal h | Inflamed | GATAD1    | protein_cc chr7  | 92076767 | 92088150 | + | 4791  | 1479.649 | 0        | 0.43077  | 0.164832 | 2.613393 | 0.010363 | 0.052492 | 1 |
| ENSG0000 | mucosal h | Inflamed | NUDT13    | protein_cc chr10 | 74870217 | 74891586 | + | 2437  | 98.15036 | 0        | 0.533051 | 0.204002 | 2.612968 | 0.010375 | 0.052543 | 1 |
| ENSG0000 | mucosal h | Inflamed | RP11-250I | pseudoger chr9   | 69475237 | 69475614 | + | 378   | 5.704057 | 0.422434 | 0.592774 | 0.226883 | 2.61269  | 0.010383 | 0.052554 | 1 |
| ENSG0000 | mucosal h | Inflamed | CTD-2165I | pseudoger chr5   | 14620129 | 14621422 | + | 1294  | 7.367542 | 0.205251 | 0.625985 | 0.239597 | 2.612657 | 0.010384 | 0.052554 | 1 |
| ENSG0000 | mucosal h | Inflamed | AC004980  | pseudoger chr7   | 76178677 | 76257299 | + | 3110  | 106.1838 | 0.002387 | 0.411055 | 0.157334 | 2.612617 | 0.010385 | 0.052554 | 1 |
| ENSG0000 | mucosal h | Inflamed | DMRT2     | protein_cc chr9  | 1050354  | 1057552  | + | 2925  | 96.79475 | 0.02864  | 0.961021 | 0.367839 | 2.612611 | 0.010385 | 0.052554 | 1 |
| ENSG0000 | mucosal h | Inflamed | RP11-404F | antisense chr1   | 1.61E+08 | 1.61E+08 | + | 1933  | 12.56563 | 0.100239 | -0.70337 | 0.269229 | -2.61252 | 0.010387 | 0.052557 | 1 |
| ENSG0000 | mucosal h | Inflamed | ABLIM3    | protein_cc chr5  | 1.49E+08 | 1.49E+08 | + | 7216  | 749.0382 | 0        | -0.47873 | 0.18328  | -2.61202 | 0.010402 | 0.052619 | 1 |
| ENSG0000 | mucosal h | Inflamed | RP11-27M  | lincRNA chr16    | 10608699 | 10622059 | - | 502   | 2.198091 | 0.439141 | 0.41663  | 0.159523 | 2.611721 | 0.01041  | 0.052652 | 1 |
| ENSG0000 | mucosal h | Inflamed | ENPP1     | protein_cc chr6  | 1.32E+08 | 1.32E+08 | + | 8294  | 471.031  | 0        | 0.702754 | 0.269087 | 2.611621 | 0.010413 | 0.052656 | 1 |
| ENSG0000 | mucosal h | Inflamed | DRD5      | protein_cc chr4  | 9783258  | 9785632  | + | 2375  | 46.31742 | 0.362768 | -0.86925 | 0.332877 | -2.61132 | 0.010422 | 0.052689 | 1 |
| ENSG0000 | mucosal h | Inflamed | MXRA8     | protein_cc chr1  | 1288069  | 1297157  | - | 3371  | 2146.406 | 0        | -0.6054  | 0.231917 | -2.61042 | 0.010447 | 0.0528   | 1 |
| ENSG0000 | mucosal h | Inflamed | VPS26B    | protein_cc chr11 | 1.34E+08 | 1.34E+08 | + | 6483  | 3361.289 | 0        | 0.174979 | 0.067032 | 2.61039  | 0.010448 | 0.0528   | 1 |
| ENSG0000 | mucosal h | Inflamed | CD2       | protein_cc chr1  | 1.17E+08 | 1.17E+08 | + | 1679  | 719.7184 | 0        | -0.49586 | 0.189961 | -2.61034 | 0.01045  | 0.0528   | 1 |
| ENSG0000 | mucosal h | Inflamed | BTBD3     | protein_cc chr20 | 11871371 | 11907257 | + | 6228  | 1605.332 | 0        | 0.494088 | 0.189296 | 2.610141 | 0.010455 | 0.052819 | 1 |
| ENSG0000 | mucosal h | Inflamed | CTU2      | protein_cc chr16 | 88772871 | 88781794 | + | 3532  | 398.9427 | 0        | -0.25566 | 0.097967 | -2.60964 | 0.01047  | 0.052881 | 1 |
| ENSG0000 | mucosal h | Inflamed | ENHO      | protein_cc chr9  | 34521038 | 34523039 | - | 1082  | 170.926  | 0.002387 | 0.860012 | 0.329582 | 2.609406 | 0.010476 | 0.052904 | 1 |
| ENSG0000 | mucosal h | Inflamed | NLGN3     | protein_cc chrX  | 70364681 | 70391051 | + | 4006  | 79.69451 | 0.002387 | 0.499278 | 0.191365 | 2.609036 | 0.010487 | 0.052948 | 1 |
| ENSG0000 | mucosal h | Inflamed | BCO2      | protein_cc chr11 | 1.12E+08 | 1.12E+08 | + | 6789  | 56.63962 | 0.004773 | 0.659403 | 0.252755 | 2.608863 | 0.010492 | 0.052963 | 1 |
| ENSG0000 | mucosal h | Inflamed | LINC00847 | lincRNA chr5     | 1.8E+08  | 1.8E+08  | + | 2453  | 550.6086 | 0        | -0.26345 | 0.101003 | -2.60832 | 0.010507 | 0.053031 | 1 |
| ENSG0000 | mucosal h | Inflamed | ECI2      | protein_cc chr6  | 4115923  | 4135831  | - | 4579  | 1470.014 | 0        | 0.346133 | 0.132709 | 2.608204 | 0.010511 | 0.053035 | 1 |
| ENSG0000 | mucosal h | Inflamed | AUNIP     | protein_cc chr1  | 26158414 | 26185903 | - | 2352  | 45.95465 | 0.004773 | -0.40123 | 0.153839 | -2.60815 | 0.010512 | 0.053035 | 1 |
| ENSG0000 | mucosal h | Inflamed | TACC3     | protein_cc chr4  | 1723227  | 1746898  | + | 4682  | 1551.871 | 0        | -0.36471 | 0.139845 | -2.60794 | 0.010518 | 0.053056 | 1 |
| ENSG0000 | mucosal h | Inflamed | ZNF440    | protein_cc chr19 | 11925099 | 11946016 | + | 6427  | 840.6874 | 0        | 0.617847 | 0.236919 | 2.607842 | 0.010521 | 0.053059 | 1 |
| ENSG0000 | mucosal h | Inflamed | DGCR8     | protein_cc chr22 | 20067755 | 20099400 | + | 7315  | 2311.095 | 0        | 0.325891 | 0.124977 | 2.607604 | 0.010528 | 0.053081 | 1 |
| ENSG0000 | mucosal h | Inflamed | MUC20     | protein_cc chr3  | 1.95E+08 | 1.95E+08 | + | 8086  | 3172.301 | 0        | 0.652876 | 0.250379 | 2.607555 | 0.010529 | 0.053081 | 1 |
| ENSG0000 | mucosal h | Inflamed | MAPK13    | protein_cc chr6  | 36095586 | 36107842 | + | 2738  | 5227.874 | 0        | 0.315818 | 0.12112  | 2.60748  | 0.010531 | 0.053081 | 1 |
| ENSG0000 | mucosal h | Inflamed | FASTKD1   | protein_cc chr2  | 1.7E+08  | 1.7E+08  | - | 4451  | 869.6587 | 0        | 0.542729 | 0.208226 | 2.606438 | 0.010561 | 0.053222 | 1 |
| ENSG0000 | mucosal h | Inflamed | AP000525  | processed_chr22  | 16147979 | 16193004 | - | 5545  | 11.06921 | 0.164678 | -0.65836 | 0.252647 | -2.60585 | 0.010578 | 0.053297 | 1 |
| ENSG0000 | mucosal h | Inflamed | ZNF446    | protein_cc chr19 | 58985384 | 58992597 | + | 4923  | 523.6993 | 0        | 0.228748 | 0.087792 | 2.605568 | 0.010587 | 0.053328 | 1 |
| ENSG0000 | mucosal h | Inflamed | RAB3C     | protein_cc chr5  | 57878048 | 58155213 | + | 9648  | 65.60143 | 0.002387 | -0.55886 | 0.214502 | -2.60539 | 0.010592 | 0.053343 | 1 |

|          |           |          |           |            |       |          |          |   |       |          |          |          |          |          |          |          |   |
|----------|-----------|----------|-----------|------------|-------|----------|----------|---|-------|----------|----------|----------|----------|----------|----------|----------|---|
| ENSG0000 | mucosal h | Inflamed | RP11-21A7 | antisense  | chr11 | 63803442 | 63871125 | + | 883   | 1.093079 | 0.725537 | 0.370213 | 0.142107 | 2.605165 | 0.010598 | 0.053362 | 1 |
| ENSG0000 | mucosal h | Inflamed | NMB       | protein_cc | chr15 | 85198360 | 85201794 | - | 1022  | 88.13604 | 0        | -0.45726 | 0.175525 | -2.60512 | 0.010599 | 0.053362 | 1 |
| ENSG0000 | mucosal h | Inflamed | RP11-498E | antisense  | chr16 | 71963914 | 71965102 | + | 1189  | 31.24582 | 0.00716  | 0.448396 | 0.172145 | 2.604758 | 0.01061  | 0.053405 | 1 |
| ENSG0000 | mucosal h | Inflamed | RP1-89D4  | pseudoger  | chr11 | 33258554 | 33258955 | + | 402   | 1.112172 | 0.727924 | -0.33356 | 0.128081 | -2.60431 | 0.010623 | 0.05346  | 1 |
| ENSG0000 | mucosal h | Inflamed | PRKD2     | protein_cc | chr19 | 47177532 | 47220384 | - | 5446  | 3518.635 | 0        | -0.27573 | 0.105882 | -2.60412 | 0.010628 | 0.053478 | 1 |
| ENSG0000 | mucosal h | Inflamed | POMT1     | protein_cc | chr9  | 1.34E+08 | 1.34E+08 | + | 6084  | 1211.384 | 0        | 0.261345 | 0.100369 | 2.60383  | 0.010637 | 0.053509 | 1 |
| ENSG0000 | mucosal h | Inflamed | RP5-991G  | antisense  | chr16 | 72699069 | 72821143 | + | 462   | 19.60859 | 0.01432  | 0.413512 | 0.158817 | 2.603708 | 0.01064  | 0.053509 | 1 |
| ENSG0000 | mucosal h | Inflamed | KCTD13    | protein_cc | chr16 | 29916333 | 29938356 | - | 4861  | 671.7685 | 0        | 0.337238 | 0.129528 | 2.603586 | 0.010644 | 0.053509 | 1 |
| ENSG0000 | mucosal h | Inflamed | TUBA1A    | protein_cc | chr12 | 49578579 | 49583107 | - | 3421  | 2422.561 | 0        | -0.52328 | 0.200983 | -2.60358 | 0.010644 | 0.053509 | 1 |
| ENSG0000 | mucosal h | Inflamed | CTB-78O2  | pseudoger  | chr5  | 1.45E+08 | 1.45E+08 | - | 876   | 19.41289 | 0.128878 | 0.82523  | 0.316963 | 2.603556 | 0.010645 | 0.053509 | 1 |
| ENSG0000 | mucosal h | Inflamed | ANKRD39   | protein_cc | chr2  | 97502348 | 97523832 | - | 5330  | 194.6086 | 0        | -0.29151 | 0.111993 | -2.60293 | 0.010663 | 0.05359  | 1 |
| ENSG0000 | mucosal h | Inflamed | RAG1      | protein_cc | chr11 | 36532259 | 36614706 | + | 7815  | 61.53938 | 0.009547 | 0.593446 | 0.228008 | 2.602743 | 0.010668 | 0.053607 | 1 |
| ENSG0000 | mucosal h | Inflamed | CNTF      | protein_cc | chr11 | 58390146 | 58393198 | + | 1886  | 17.46539 | 0.045346 | 0.586399 | 0.22531  | 2.602633 | 0.010672 | 0.053613 | 1 |
| ENSG0000 | mucosal h | Inflamed | TMEM184   | protein_cc | chr7  | 1581871  | 1600457  | - | 7805  | 3215.21  | 0        | 0.644705 | 0.247729 | 2.60246  | 0.010677 | 0.05362  | 1 |
| ENSG0000 | mucosal h | Inflamed | RN7SL737I | misc_RNA   | chr12 | 93903263 | 93903544 | + | 282   | 15.77566 | 0.062053 | 0.591522 | 0.2273   | 2.60239  | 0.010679 | 0.05362  | 1 |
| ENSG0000 | mucosal h | Inflamed | TAS2R38   | protein_cc | chr7  | 1.42E+08 | 1.42E+08 | - | 1143  | 3.011933 | 0.529833 | 0.526926 | 0.20248  | 2.602361 | 0.01068  | 0.05362  | 1 |
| ENSG0000 | mucosal h | Inflamed | KIF9-AS1  | antisense  | chr3  | 47205987 | 47288091 | + | 4898  | 49.34129 | 0.004773 | 0.317025 | 0.121825 | 2.602303 | 0.010681 | 0.05362  | 1 |
| ENSG0000 | mucosal h | Inflamed | MBTD1     | protein_cc | chr17 | 49254786 | 49337524 | - | 7201  | 654.1217 | 0        | 0.546337 | 0.209992 | 2.601699 | 0.010699 | 0.053698 | 1 |
| ENSG0000 | mucosal h | Inflamed | ADAMTS1   | protein_cc | chr5  | 1.29E+08 | 1.29E+08 | + | 5408  | 10.31265 | 0.155131 | 0.692599 | 0.266238 | 2.60143  | 0.010707 | 0.053727 | 1 |
| ENSG0000 | mucosal h | Inflamed | MAPK12    | protein_cc | chr22 | 50683879 | 50700254 | - | 9421  | 304.5919 | 0        | -0.43349 | 0.166653 | -2.60115 | 0.010715 | 0.053758 | 1 |
| ENSG0000 | mucosal h | Inflamed | MAPK9     | protein_cc | chr5  | 1.8E+08  | 1.8E+08  | - | 8955  | 1575.678 | 0        | 0.343029 | 0.131899 | 2.600686 | 0.010728 | 0.053816 | 1 |
| ENSG0000 | mucosal h | Inflamed | IDH1      | protein_cc | chr2  | 2.09E+08 | 2.09E+08 | - | 4721  | 4530.905 | 0        | 0.444241 | 0.170823 | 2.600599 | 0.010731 | 0.053818 | 1 |
| ENSG0000 | mucosal h | Inflamed | APOBEC3C  | protein_cc | chr22 | 39410368 | 39429281 | + | 2545  | 394.9618 | 0        | -0.42304 | 0.162684 | -2.60041 | 0.010737 | 0.053828 | 1 |
| ENSG0000 | mucosal h | Inflamed | RP11-50E1 | antisense  | chr10 | 52384711 | 52401211 | + | 12420 | 159.6778 | 0        | 0.456997 | 0.175741 | 2.600396 | 0.010737 | 0.053828 | 1 |
| ENSG0000 | mucosal h | Inflamed | RP11-187C | lincRNA    | chr14 | 76961706 | 77193055 | - | 632   | 3.190931 | 0.369928 | -0.45756 | 0.175975 | -2.60014 | 0.010744 | 0.053853 | 1 |
| ENSG0000 | mucosal h | Inflamed | CCDC171   | protein_cc | chr9  | 15552895 | 16061661 | + | 15223 | 64.02148 | 0.002387 | 0.552402 | 0.212456 | 2.600082 | 0.010746 | 0.053853 | 1 |
| ENSG0000 | mucosal h | Inflamed | PTGS2     | protein_cc | chr1  | 1.87E+08 | 1.87E+08 | - | 5269  | 1251.661 | 0.002387 | -1.20369 | 0.463024 | -2.59963 | 0.010759 | 0.053902 | 1 |
| ENSG0000 | mucosal h | Inflamed | SFXN5     | protein_cc | chr2  | 73169165 | 73302747 | - | 11087 | 1067.697 | 0        | 0.252532 | 0.097144 | 2.599557 | 0.010761 | 0.053902 | 1 |
| ENSG0000 | mucosal h | Inflamed | MAP3K8    | protein_cc | chr10 | 30722866 | 30750762 | + | 3601  | 612.2864 | 0        | -0.56559 | 0.217575 | -2.59954 | 0.010762 | 0.053902 | 1 |
| ENSG0000 | mucosal h | Inflamed | LDHAL6FP  | pseudoger  | chr6  | 1.58E+08 | 1.58E+08 | - | 1082  | 2.455847 | 0.451074 | 0.46101  | 0.177389 | 2.598864 | 0.010782 | 0.053991 | 1 |
| ENSG0000 | mucosal h | Inflamed | DCHS2     | protein_cc | chr4  | 1.55E+08 | 1.55E+08 | - | 14564 | 36.83294 | 0.050119 | 0.912855 | 0.3513   | 2.598507 | 0.010792 | 0.054033 | 1 |
| ENSG0000 | mucosal h | Inflamed | RP11-83A2 | antisense  | chr4  | 1.4E+08  | 1.4E+08  | - | 7954  | 91.179   | 0        | 0.511396 | 0.196815 | 2.598361 | 0.010797 | 0.054044 | 1 |
| ENSG0000 | mucosal h | Inflamed | SLC17A9   | protein_cc | chr20 | 61584052 | 61599949 | + | 4480  | 2319.146 | 0        | -0.53082 | 0.204324 | -2.59795 | 0.010809 | 0.054095 | 1 |
| ENSG0000 | mucosal h | Inflamed | LDHD      | protein_cc | chr16 | 75145758 | 75150669 | - | 2359  | 2206.461 | 0        | 0.683191 | 0.263017 | 2.597511 | 0.010822 | 0.054149 | 1 |
| ENSG0000 | mucosal h | Inflamed | STXBP5L   | protein_cc | chr3  | 1.21E+08 | 1.21E+08 | + | 11085 | 4.422434 | 0.298329 | 0.611038 | 0.23527  | 2.597173 | 0.010832 | 0.054189 | 1 |
| ENSG0000 | mucosal h | Inflamed | CD83      | protein_cc | chr6  | 14117872 | 14137149 | + | 2471  | 612.5322 | 0        | -0.67251 | 0.258949 | -2.59708 | 0.010834 | 0.054192 | 1 |
| ENSG0000 | mucosal h | Inflamed | RP11-497E | lincRNA    | chr5  | 69745463 | 69746180 | + | 718   | 3.618138 | 0.391408 | 0.472715 | 0.182075 | 2.596268 | 0.010858 | 0.054296 | 1 |
| ENSG0000 | mucosal h | Inflamed | H2AFV     | protein_cc | chr7  | 44866390 | 44887682 | - | 4749  | 3318.263 | 0        | 0.220111 | 0.084781 | 2.596234 | 0.010859 | 0.054296 | 1 |
| ENSG0000 | mucosal h | Inflamed | PRSS1     | protein_cc | chr7  | 1.42E+08 | 1.42E+08 | + | 1872  | 153.1098 | 0.167064 | -1.50945 | 0.58143  | -2.59609 | 0.010863 | 0.054302 | 1 |
| ENSG0000 | mucosal h | Inflamed | TMEM107   | protein_cc | chr17 | 8076555  | 8079717  | - | 3163  | 226.2148 | 0        | -0.26214 | 0.10098  | -2.59601 | 0.010866 | 0.054302 | 1 |

|          |           |          |           |            |       |          |          |   |       |          |          |          |          |          |          |          |   |
|----------|-----------|----------|-----------|------------|-------|----------|----------|---|-------|----------|----------|----------|----------|----------|----------|----------|---|
| ENSG0000 | mucosal h | Inflamed | ZNF649    | protein_cc | chr19 | 52392477 | 52408293 | - | 4365  | 169.5227 | 0.004773 | 0.436834 | 0.168275 | 2.595958 | 0.010867 | 0.054302 | 1 |
| ENSG0000 | mucosal h | Inflamed | BOC       | protein_cc | chr3  | 1.13E+08 | 1.13E+08 | + | 10327 | 723.5394 | 0        | -0.57478 | 0.221422 | -2.59587 | 0.01087  | 0.054302 | 1 |
| ENSG0000 | mucosal h | Inflamed | CTD-2288F | antisense  | chr16 | 18938185 | 18948365 | + | 463   | 15.75895 | 0.004773 | 0.40693  | 0.156762 | 2.595843 | 0.010871 | 0.054302 | 1 |
| ENSG0000 | mucosal h | Inflamed | TMC6      | protein_cc | chr17 | 76106539 | 76128488 | - | 8669  | 4255.186 | 0        | -0.33432 | 0.128802 | -2.59562 | 0.010878 | 0.054325 | 1 |
| ENSG0000 | mucosal h | Inflamed | TMEM198   | protein_cc | chr2  | 2.2E+08  | 2.2E+08  | + | 2578  | 137.8998 | 0        | -0.41108 | 0.158379 | -2.59555 | 0.010879 | 0.054325 | 1 |
| ENSG0000 | mucosal h | Inflamed | RP11-158k | antisense  | chr8  | 1.26E+08 | 1.26E+08 | + | 2355  | 63.60621 | 0.016706 | 0.60829  | 0.234407 | 2.595018 | 0.010895 | 0.054393 | 1 |
| ENSG0000 | mucosal h | Inflamed | TK1       | protein_cc | chr17 | 76170160 | 76183314 | - | 1857  | 1604.413 | 0        | -0.33265 | 0.128192 | -2.59492 | 0.010898 | 0.054397 | 1 |
| ENSG0000 | mucosal h | Inflamed | CD8A      | protein_cc | chr2  | 87011729 | 87035519 | - | 3638  | 664.6229 | 0        | -0.45539 | 0.175498 | -2.59484 | 0.010901 | 0.054399 | 1 |
| ENSG0000 | mucosal h | Inflamed | KB-1507C5 | lincRNA    | chr8  | 1.04E+08 | 1.04E+08 | + | 563   | 18.70644 | 0.105012 | -0.87228 | 0.336171 | -2.59475 | 0.010903 | 0.054402 | 1 |
| ENSG0000 | mucosal h | Inflamed | SLC26A3   | protein_cc | chr7  | 1.07E+08 | 1.07E+08 | - | 3382  | 43314.43 | 0        | 1.474544 | 0.56832  | 2.594569 | 0.010909 | 0.054418 | 1 |
| ENSG0000 | mucosal h | Inflamed | DOK1      | protein_cc | chr2  | 74776153 | 74784681 | + | 3049  | 851.4988 | 0        | -0.25519 | 0.098361 | -2.59444 | 0.010912 | 0.054427 | 1 |
| ENSG0000 | mucosal h | Inflamed | AC007879  | lincRNA    | chr2  | 2.08E+08 | 2.08E+08 | + | 1204  | 1.460621 | 0.651551 | -0.45125 | 0.173954 | -2.59406 | 0.010924 | 0.054473 | 1 |
| ENSG0000 | mucosal h | Inflamed | PAQR4     | protein_cc | chr16 | 3019246  | 3023490  | + | 2972  | 1163.893 | 0        | -0.27484 | 0.105955 | -2.59396 | 0.010927 | 0.054478 | 1 |
| ENSG0000 | mucosal h | Inflamed | FAM149A   | protein_cc | chr4  | 1.87E+08 | 1.87E+08 | + | 5218  | 336.6229 | 0        | 0.357784 | 0.137984 | 2.592936 | 0.010957 | 0.054619 | 1 |
| ENSG0000 | mucosal h | Inflamed | STOX1     | protein_cc | chr10 | 70587298 | 70655188 | + | 3568  | 71.10263 | 0.00716  | 0.565501 | 0.218108 | 2.592761 | 0.010962 | 0.054629 | 1 |
| ENSG0000 | mucosal h | Inflamed | SORCS3    | protein_cc | chr10 | 1.06E+08 | 1.07E+08 | + | 6182  | 5.642005 | 0.260143 | 0.692207 | 0.266983 | 2.592698 | 0.010964 | 0.054629 | 1 |
| ENSG0000 | mucosal h | Inflamed | RHOJ      | protein_cc | chr14 | 63670832 | 63759937 | + | 3793  | 422.8568 | 0        | -0.56937 | 0.219613 | -2.5926  | 0.010967 | 0.054629 | 1 |
| ENSG0000 | mucosal h | Inflamed | RP4-704D2 | lincRNA    | chr1  | 1.46E+08 | 1.46E+08 | - | 884   | 6.484487 | 0.178998 | 0.560912 | 0.216352 | 2.592593 | 0.010967 | 0.054629 | 1 |
| ENSG0000 | mucosal h | Inflamed | GPR182    | protein_cc | chr12 | 57388230 | 57390468 | + | 1694  | 4.24105  | 0.381862 | -0.597   | 0.230284 | -2.59247 | 0.010971 | 0.054636 | 1 |
| ENSG0000 | mucosal h | Inflamed | PBX1      | protein_cc | chr1  | 1.65E+08 | 1.65E+08 | + | 21771 | 2068.535 | 0        | 0.456916 | 0.176258 | 2.592313 | 0.010976 | 0.05465  | 1 |
| ENSG0000 | mucosal h | Inflamed | NAT2      | protein_cc | chr8  | 18248755 | 18258728 | + | 1322  | 328.0286 | 0.00716  | 0.766819 | 0.295833 | 2.592069 | 0.010983 | 0.054675 | 1 |
| ENSG0000 | mucosal h | Inflamed | RP11-563M | sense_intr | chr10 | 50086067 | 50086694 | + | 273   | 1.221957 | 0.718377 | -0.35383 | 0.136518 | -2.59182 | 0.01099  | 0.054693 | 1 |
| ENSG0000 | mucosal h | Inflamed | TRAF3IP2  | protein_cc | chr6  | 1.12E+08 | 1.12E+08 | - | 6553  | 2259.914 | 0        | 0.230864 | 0.089076 | 2.591752 | 0.010992 | 0.054693 | 1 |
| ENSG0000 | mucosal h | Inflamed | PSEN2     | protein_cc | chr1  | 2.27E+08 | 2.27E+08 | + | 3757  | 836.9523 | 0        | -0.20649 | 0.079672 | -2.59174 | 0.010993 | 0.054693 | 1 |
| ENSG0000 | mucosal h | Inflamed | RBM8A     | protein_cc | chr1  | 1.46E+08 | 1.46E+08 | + | 5240  | 2416.337 | 0        | 0.281252 | 0.108537 | 2.591306 | 0.011006 | 0.054748 | 1 |
| ENSG0000 | mucosal h | Inflamed | CHRNE     | protein_cc | chr17 | 4801069  | 4806369  | - | 2641  | 51.42005 | 0        | -0.51043 | 0.197012 | -2.59084 | 0.01102  | 0.054807 | 1 |
| ENSG0000 | mucosal h | Inflamed | ZFYVE19   | protein_cc | chr15 | 41099284 | 41106767 | + | 4264  | 972.0931 | 0        | 0.191447 | 0.073899 | 2.590664 | 0.011025 | 0.054822 | 1 |
| ENSG0000 | mucosal h | Inflamed | FAIM2     | protein_cc | chr12 | 50260679 | 50298000 | - | 6057  | 305.8807 | 0.004773 | -0.70775 | 0.27322  | -2.59041 | 0.011033 | 0.05485  | 1 |
| ENSG0000 | mucosal h | Inflamed | AC069363  | antisense  | chr17 | 34400226 | 34417480 | + | 1706  | 12.66348 | 0.119332 | -0.66762 | 0.257741 | -2.59026 | 0.011037 | 0.054856 | 1 |
| ENSG0000 | mucosal h | Inflamed | NT5E      | protein_cc | chr6  | 86159809 | 86205500 | + | 4017  | 1757.389 | 0        | 0.482828 | 0.186404 | 2.590227 | 0.011038 | 0.054856 | 1 |
| ENSG0000 | mucosal h | Inflamed | FAM171A2  | protein_cc | chr17 | 42430583 | 42441243 | - | 3592  | 40.37709 | 0.011933 | -0.6317  | 0.243893 | -2.59008 | 0.011042 | 0.054858 | 1 |
| ENSG0000 | mucosal h | Inflamed | OSBPL7    | protein_cc | chr17 | 45884738 | 45899200 | - | 6572  | 2364.587 | 0        | 0.438028 | 0.169118 | 2.590077 | 0.011043 | 0.054858 | 1 |
| ENSG0000 | mucosal h | Inflamed | IGLV7-35  | IG_V_pseu  | chr22 | 22804540 | 22804990 | + | 340   | 3.949881 | 0.539379 | -0.65    | 0.250969 | -2.58998 | 0.011045 | 0.054862 | 1 |
| ENSG0000 | mucosal h | Inflamed | PWWP2A    | protein_cc | chr5  | 1.59E+08 | 1.6E+08  | - | 6507  | 1002.334 | 0        | 0.441506 | 0.170483 | 2.589736 | 0.011053 | 0.054888 | 1 |
| ENSG0000 | mucosal h | Inflamed | TLX1      | protein_cc | chr10 | 1.03E+08 | 1.03E+08 | + | 4425  | 20.70167 | 0.105012 | 0.815242 | 0.314869 | 2.589151 | 0.01107  | 0.054965 | 1 |
| ENSG0000 | mucosal h | Inflamed | MPZL3     | protein_cc | chr11 | 1.18E+08 | 1.18E+08 | - | 3964  | 577.8568 | 0        | 0.522513 | 0.201826 | 2.588927 | 0.011077 | 0.054981 | 1 |
| ENSG0000 | mucosal h | Inflamed | P2RX4     | protein_cc | chr12 | 1.22E+08 | 1.22E+08 | + | 8159  | 2637.043 | 0        | 0.302043 | 0.116668 | 2.588904 | 0.011078 | 0.054981 | 1 |
| ENSG0000 | mucosal h | Inflamed | RP11-64K1 | sense_ove  | chr15 | 40666599 | 40668192 | + | 1594  | 34.84487 | 0.073986 | 0.820512 | 0.316962 | 2.588675 | 0.011085 | 0.055005 | 1 |
| ENSG0000 | mucosal h | Inflamed | RP11-685E | pseudoger  | chr8  | 18240784 | 18241427 | - | 644   | 2.761337 | 0.439141 | 0.455321 | 0.175898 | 2.588547 | 0.011089 | 0.055014 | 1 |
| ENSG0000 | mucosal h | Inflamed | PDXDC2P   | pseudoger  | chr16 | 70044654 | 70099848 | - | 2707  | 11.33174 | 0.026253 | 0.486125 | 0.187807 | 2.58843  | 0.011092 | 0.055021 | 1 |



|          |           |          |           |            |       |          |          |   |       |          |          |          |          |          |          |          |   |
|----------|-----------|----------|-----------|------------|-------|----------|----------|---|-------|----------|----------|----------|----------|----------|----------|----------|---|
| ENSG0000 | mucosal h | Inflamed | YBX1      | protein_cc | chr1  | 43148098 | 43168020 | + | 1930  | 17979.95 | 0        | 0.197185 | 0.076182 | 2.588343 | 0.011095 | 0.055021 | 1 |
| ENSG0000 | mucosal h | Inflamed | CTD-3185F | antisense  | chr15 | 66780996 | 66781427 | - | 432   | 1.539379 | 0.587112 | 0.363657 | 0.140503 | 2.588254 | 0.011097 | 0.055021 | 1 |
| ENSG0000 | mucosal h | Inflamed | MICAL2    | protein_cc | chr11 | 12115543 | 12285334 | + | 15819 | 13244.55 | 0        | 0.41041  | 0.158569 | 2.588219 | 0.011098 | 0.055021 | 1 |
| ENSG0000 | mucosal h | Inflamed | ABCC9     | protein_cc | chr12 | 21950335 | 22094336 | - | 11421 | 113.7613 | 0.016706 | -0.80994 | 0.312961 | -2.588   | 0.011105 | 0.055044 | 1 |
| ENSG0000 | mucosal h | Inflamed | TMPPE     | protein_cc | chr3  | 33131913 | 33138293 | - | 3966  | 166.3103 | 0.00716  | 0.330781 | 0.127824 | 2.587792 | 0.011111 | 0.055059 | 1 |
| ENSG0000 | mucosal h | Inflamed | RP11-288F | lincRNA    | chr6  | 1.61E+08 | 1.61E+08 | + | 3131  | 181.2792 | 0        | 0.338456 | 0.130792 | 2.587738 | 0.011113 | 0.055059 | 1 |
| ENSG0000 | mucosal h | Inflamed | RP11-30K9 | lincRNA    | chr15 | 59060271 | 59063173 | - | 1396  | 13.7136  | 0.004773 | 0.377746 | 0.145982 | 2.587618 | 0.011117 | 0.055059 | 1 |
| ENSG0000 | mucosal h | Inflamed | SH3GL1P1  | pseudoger  | chr17 | 30366993 | 30369847 | + | 2855  | 55.82816 | 0.031026 | 0.772206 | 0.298424 | 2.587615 | 0.011117 | 0.055059 | 1 |
| ENSG0000 | mucosal h | Inflamed | AC093323  | lincRNA    | chr4  | 6675178  | 6677774  | + | 2311  | 376.3699 | 0        | 0.288572 | 0.111539 | 2.587177 | 0.01113  | 0.055115 | 1 |
| ENSG0000 | mucosal h | Inflamed | MARK4     | protein_cc | chr19 | 45582546 | 45808541 | + | 6668  | 878.9141 | 0        | -0.33328 | 0.128825 | -2.58704 | 0.011134 | 0.055124 | 1 |
| ENSG0000 | mucosal h | Inflamed | SORL1     | protein_cc | chr11 | 1.21E+08 | 1.22E+08 | + | 19449 | 7536.088 | 0        | 0.490959 | 0.189804 | 2.586667 | 0.011145 | 0.05517  | 1 |
| ENSG0000 | mucosal h | Inflamed | RP11-298C | lincRNA    | chr3  | 1.68E+08 | 1.68E+08 | + | 3198  | 2.735084 | 0.453461 | -0.56261 | 0.21751  | -2.58658 | 0.011148 | 0.055173 | 1 |
| ENSG0000 | mucosal h | Inflamed | RP5-1039k | antisense  | chr22 | 38346972 | 38347785 | + | 814   | 4.665871 | 0.159905 | 0.401425 | 0.155204 | 2.586434 | 0.011152 | 0.055184 | 1 |
| ENSG0000 | mucosal h | Inflamed | DRP2      | protein_cc | chrX  | 1E+08    | 1.01E+08 | + | 8187  | 51.2864  | 0.02864  | 0.626012 | 0.242043 | 2.586366 | 0.011154 | 0.055184 | 1 |
| ENSG0000 | mucosal h | Inflamed | CHST6     | protein_cc | chr16 | 75510949 | 75529282 | - | 3470  | 139.0979 | 0.011933 | 0.578044 | 0.223529 | 2.585987 | 0.011166 | 0.055231 | 1 |
| ENSG0000 | mucosal h | Inflamed | RP11-22L1 | lincRNA    | chr1  | 3223200  | 3226660  | - | 3461  | 30       | 0.026253 | 0.628029 | 0.242877 | 2.585798 | 0.011172 | 0.055249 | 1 |
| ENSG0000 | mucosal h | Inflamed | CAPN5     | protein_cc | chr11 | 76777979 | 76837201 | + | 6166  | 16599.91 | 0        | 0.528423 | 0.204379 | 2.585508 | 0.01118  | 0.055282 | 1 |
| ENSG0000 | mucosal h | Inflamed | RABL5     | protein_cc | chr7  | 1.01E+08 | 1.01E+08 | - | 3736  | 238.2434 | 0        | -0.33412 | 0.129234 | -2.5854  | 0.011184 | 0.055287 | 1 |
| ENSG0000 | mucosal h | Inflamed | SLC9A7    | protein_cc | chrX  | 46464753 | 46618490 | - | 3838  | 132.7613 | 0.004773 | -0.52418 | 0.20277  | -2.5851  | 0.011193 | 0.055322 | 1 |
| ENSG0000 | mucosal h | Inflamed | SPATA12   | protein_cc | chr3  | 57094469 | 57109460 | + | 2413  | 9.961814 | 0.121718 | -0.48902 | 0.189223 | -2.58436 | 0.011215 | 0.055423 | 1 |
| ENSG0000 | mucosal h | Inflamed | DENND6B   | protein_cc | chr22 | 50747459 | 50765489 | - | 5935  | 477.4535 | 0        | -0.2943  | 0.113883 | -2.58423 | 0.011219 | 0.055424 | 1 |
| ENSG0000 | mucosal h | Inflamed | AJUBA     | protein_cc | chr14 | 23440383 | 23451851 | - | 5979  | 249.6897 | 0        | -0.51441 | 0.19906  | -2.58421 | 0.01122  | 0.055424 | 1 |
| ENSG0000 | mucosal h | Inflamed | RNU6-107  | snRNA      | chr5  | 32234872 | 32234981 | - | 110   | 0.830549 | 0.782816 | 0.341035 | 0.131985 | 2.583901 | 0.011229 | 0.055461 | 1 |
| ENSG0000 | mucosal h | Inflamed | RP11-529J | pseudoger  | chr15 | 23675986 | 23680359 | + | 736   | 2.362768 | 0.446301 | -0.44307 | 0.171514 | -2.5833  | 0.011248 | 0.055541 | 1 |
| ENSG0000 | mucosal h | Inflamed | PEX7      | protein_cc | chr6  | 1.37E+08 | 1.37E+08 | + | 1832  | 236.3866 | 0        | 0.295309 | 0.114331 | 2.582935 | 0.011259 | 0.055579 | 1 |
| ENSG0000 | mucosal h | Inflamed | BEND3P3   | pseudoger  | chr10 | 81444250 | 81444739 | - | 490   | 18.93317 | 0.059666 | 0.541104 | 0.209503 | 2.582795 | 0.011263 | 0.055579 | 1 |
| ENSG0000 | mucosal h | Inflamed | APOBEC4   | protein_cc | chr1  | 1.84E+08 | 1.84E+08 | - | 2651  | 1.735084 | 0.601432 | 0.403848 | 0.156361 | 2.582793 | 0.011263 | 0.055579 | 1 |
| ENSG0000 | mucosal h | Inflamed | TSEN54    | protein_cc | chr17 | 73512141 | 73520820 | + | 3440  | 1006.224 | 0        | 0.229256 | 0.088764 | 2.582765 | 0.011264 | 0.055579 | 1 |
| ENSG0000 | mucosal h | Inflamed | RP1-212P9 | antisense  | chr1  | 29196995 | 29203848 | - | 1085  | 2.976134 | 0.317422 | -0.38591 | 0.149425 | -2.58264 | 0.011268 | 0.055588 | 1 |
| ENSG0000 | mucosal h | Inflamed | RP11-295F | antisense  | chr10 | 13717646 | 13717990 | + | 345   | 4.085919 | 0.274463 | 0.491852 | 0.190457 | 2.582485 | 0.011272 | 0.055601 | 1 |
| ENSG0000 | mucosal h | Inflamed | RP11-379E | lincRNA    | chr3  | 1.25E+08 | 1.26E+08 | + | 373   | 2.668258 | 0.505967 | 0.487791 | 0.188892 | 2.582376 | 0.011276 | 0.055603 | 1 |
| ENSG0000 | mucosal h | Inflamed | PTPN1     | protein_cc | chr20 | 49126891 | 49201299 | + | 3529  | 3943.305 | 0        | -0.34024 | 0.131757 | -2.58233 | 0.011277 | 0.055603 | 1 |
| ENSG0000 | mucosal h | Inflamed | RASGRP3   | protein_cc | chr2  | 33661391 | 33789817 | + | 11118 | 547.7995 | 0        | -0.63415 | 0.245588 | -2.58218 | 0.011282 | 0.055616 | 1 |
| ENSG0000 | mucosal h | Inflamed | PTPRK     | protein_cc | chr6  | 1.28E+08 | 1.29E+08 | - | 9066  | 3828.862 | 0        | 0.40812  | 0.158061 | 2.582049 | 0.011286 | 0.055625 | 1 |
| ENSG0000 | mucosal h | Inflamed | CCNG1     | protein_cc | chr5  | 1.63E+08 | 1.63E+08 | + | 3096  | 2103.988 | 0        | 0.37936  | 0.146969 | 2.581227 | 0.011311 | 0.055738 | 1 |
| ENSG0000 | mucosal h | Inflamed | TMEM256   | protein_cc | chr17 | 7293046  | 7307416  | - | 3227  | 86.1599  | 0.002387 | -0.39263 | 0.152139 | -2.58075 | 0.011325 | 0.0558   | 1 |
| ENSG0000 | mucosal h | Inflamed | EMC7      | protein_cc | chr15 | 34376218 | 34394149 | - | 1538  | 1217.668 | 0        | -0.23    | 0.089134 | -2.58037 | 0.011337 | 0.055842 | 1 |
| ENSG0000 | mucosal h | Inflamed | SOD2      | protein_cc | chr6  | 1.6E+08  | 1.6E+08  | - | 18985 | 18554.67 | 0        | -0.76156 | 0.29514  | -2.58034 | 0.011338 | 0.055842 | 1 |
| ENSG0000 | mucosal h | Inflamed | PLXNB1    | protein_cc | chr3  | 48445261 | 48471594 | - | 9796  | 4862.315 | 0        | 0.419318 | 0.162526 | 2.580012 | 0.011348 | 0.05588  | 1 |
| ENSG0000 | mucosal h | Inflamed | LRIG2     | protein_cc | chr1  | 1.14E+08 | 1.14E+08 | + | 12456 | 1051.282 | 0        | 0.522284 | 0.202444 | 2.579902 | 0.011352 | 0.055886 | 1 |

|          |           |          |           |                  |          |          |   |       |          |          |          |          |          |          |          |   |
|----------|-----------|----------|-----------|------------------|----------|----------|---|-------|----------|----------|----------|----------|----------|----------|----------|---|
| ENSG0000 | mucosal h | Inflamed | GAN       | protein_cc chr16 | 81348557 | 81424489 | + | 15406 | 745.9928 | 0        | 0.59041  | 0.228865 | 2.579733 | 0.011357 | 0.055902 | 1 |
| ENSG0000 | mucosal h | Inflamed | SYNJ2BP   | protein_cc chr14 | 70838148 | 70883778 | - | 2096  | 635.8759 | 0        | 0.367    | 0.142294 | 2.579171 | 0.011374 | 0.055976 | 1 |
| ENSG0000 | mucosal h | Inflamed | AL353898. | pseudoger chr1   | 54498816 | 54500553 | - | 1737  | 26.22673 | 0.042959 | 0.675536 | 0.261928 | 2.579095 | 0.011376 | 0.055977 | 1 |
| ENSG0000 | mucosal h | Inflamed | PLXDC1    | protein_cc chr17 | 37219556 | 37310647 | - | 9277  | 761.9308 | 0        | -0.69884 | 0.270972 | -2.57901 | 0.011379 | 0.05598  | 1 |
| ENSG0000 | mucosal h | Inflamed | RP1-1500! | lincRNA chr1     | 23875630 | 23877406 | - | 456   | 8.210024 | 0.073986 | 0.462575 | 0.179379 | 2.578758 | 0.011387 | 0.056008 | 1 |
| ENSG0000 | mucosal h | Inflamed | SUV420H2  | protein_cc chr19 | 55851221 | 55859488 | + | 4775  | 401.8449 | 0        | 0.294395 | 0.114192 | 2.57807  | 0.011408 | 0.056101 | 1 |
| ENSG0000 | mucosal h | Inflamed | GSTA1     | protein_cc chr6  | 52656462 | 52668708 | - | 1019  | 236.358  | 0.038186 | 0.931035 | 0.361162 | 2.57789  | 0.011414 | 0.056118 | 1 |
| ENSG0000 | mucosal h | Inflamed | KLHL14    | protein_cc chr18 | 30252634 | 30353025 | - | 4992  | 35.9284  | 0.042959 | -0.8336  | 0.323444 | -2.57726 | 0.011433 | 0.056204 | 1 |
| ENSG0000 | mucosal h | Inflamed | MAVS      | protein_cc chr20 | 3827487  | 3849280  | + | 4240  | 5028.788 | 0        | 0.345317 | 0.133996 | 2.577066 | 0.011439 | 0.056223 | 1 |
| ENSG0000 | mucosal h | Inflamed | ORM1      | protein_cc chr9  | 1.17E+08 | 1.17E+08 | + | 1532  | 7.677804 | 0.568019 | -0.89442 | 0.347117 | -2.5767  | 0.011451 | 0.056269 | 1 |
| ENSG0000 | mucosal h | Inflamed | YAP1P1    | pseudoger chr6   | 1.48E+08 | 1.48E+08 | + | 1393  | 5.026253 | 0.25537  | 0.566154 | 0.21973  | 2.576593 | 0.011454 | 0.056274 | 1 |
| ENSG0000 | mucosal h | Inflamed | FHL5      | protein_cc chr6  | 97010424 | 97064512 | + | 2135  | 24.31742 | 0.023866 | -0.58262 | 0.226158 | -2.57617 | 0.011467 | 0.056327 | 1 |
| ENSG0000 | mucosal h | Inflamed | CHPF2     | protein_cc chr7  | 1.51E+08 | 1.51E+08 | + | 4200  | 4124.702 | 0        | -0.33162 | 0.128737 | -2.57596 | 0.011473 | 0.056348 | 1 |
| ENSG0000 | mucosal h | Inflamed | ABHD11    | protein_cc chr7  | 73150424 | 73153197 | - | 2289  | 1752.198 | 0        | 0.347264 | 0.134827 | 2.575637 | 0.011483 | 0.056387 | 1 |
| ENSG0000 | mucosal h | Inflamed | NCR3      | protein_cc chr6  | 31556672 | 31560762 | - | 1212  | 45.88067 | 0        | -0.58944 | 0.228868 | -2.57547 | 0.011489 | 0.056387 | 1 |
| ENSG0000 | mucosal h | Inflamed | CAPN3     | protein_cc chr15 | 42640301 | 42704516 | + | 5129  | 80.00955 | 0.02148  | 0.768121 | 0.298247 | 2.575454 | 0.011489 | 0.056387 | 1 |
| ENSG0000 | mucosal h | Inflamed | LINC00895 | processed_chr22  | 46435787 | 46440733 | - | 4947  | 119.6611 | 0        | 0.515352 | 0.200106 | 2.575392 | 0.011491 | 0.056387 | 1 |
| ENSG0000 | mucosal h | Inflamed | RP11-732A | antisense chr11  | 6640021  | 6640995  | + | 464   | 0.818616 | 0.799523 | -0.31954 | 0.124074 | -2.57537 | 0.011492 | 0.056387 | 1 |
| ENSG0000 | mucosal h | Inflamed | CAMK2D    | protein_cc chr4  | 1.14E+08 | 1.15E+08 | - | 7363  | 2121.699 | 0        | 0.531617 | 0.206436 | 2.57521  | 0.011497 | 0.056392 | 1 |
| ENSG0000 | mucosal h | Inflamed | RP11-308C | processed_chrX   | 1.36E+08 | 1.36E+08 | + | 2926  | 52.04773 | 0        | 0.483977 | 0.187938 | 2.575192 | 0.011497 | 0.056392 | 1 |
| ENSG0000 | mucosal h | Inflamed | KPNA2     | protein_cc chr17 | 66031635 | 66042958 | + | 3140  | 2209.711 | 0        | -0.38346 | 0.148916 | -2.57498 | 0.011504 | 0.056415 | 1 |
| ENSG0000 | mucosal h | Inflamed | AC079630  | antisense chr12  | 40579811 | 40617605 | - | 585   | 2.606205 | 0.472554 | -0.46758 | 0.181628 | -2.57437 | 0.011523 | 0.056488 | 1 |
| ENSG0000 | mucosal h | Inflamed | RIMBP2    | protein_cc chr12 | 1.31E+08 | 1.31E+08 | - | 8738  | 129.0263 | 0.019093 | 0.715008 | 0.277742 | 2.574358 | 0.011523 | 0.056488 | 1 |
| ENSG0000 | mucosal h | Inflamed | CTD-2553L | sense_intr chr19 | 35129027 | 35131594 | - | 413   | 0.804296 | 0.799523 | 0.301462 | 0.117113 | 2.574115 | 0.011531 | 0.056515 | 1 |
| ENSG0000 | mucosal h | Inflamed | CNKSR2    | protein_cc chrX  | 21392536 | 21672813 | + | 7160  | 15.31742 | 0.076372 | -0.69067 | 0.268345 | -2.57381 | 0.01154  | 0.056551 | 1 |
| ENSG0000 | mucosal h | Inflamed | HCG21     | antisense chr6   | 30913756 | 30922639 | - | 605   | 1.083532 | 0.73747  | -0.36236 | 0.140807 | -2.57344 | 0.011552 | 0.056597 | 1 |
| ENSG0000 | mucosal h | Inflamed | CCDC93    | protein_cc chr2  | 1.19E+08 | 1.19E+08 | - | 8065  | 2069.181 | 0        | 0.527235 | 0.20489  | 2.573254 | 0.011558 | 0.056607 | 1 |
| ENSG0000 | mucosal h | Inflamed | RP11-103C | antisense chr3   | 1.5E+08  | 1.5E+08  | + | 827   | 15.39618 | 0.002387 | -0.45481 | 0.176751 | -2.57318 | 0.01156  | 0.056607 | 1 |
| ENSG0000 | mucosal h | Inflamed | RP11-434F | lincRNA chr2     | 73977383 | 73977913 | - | 531   | 6.885442 | 0.155131 | 0.599381 | 0.232936 | 2.573155 | 0.011561 | 0.056607 | 1 |
| ENSG0000 | mucosal h | Inflamed | C1QC      | protein_cc chr1  | 22970123 | 22974603 | + | 1335  | 7632.22  | 0        | -0.41818 | 0.16252  | -2.57308 | 0.011563 | 0.056607 | 1 |
| ENSG0000 | mucosal h | Inflamed | TNFSF13   | protein_cc chr17 | 7461609  | 7464925  | + | 2176  | 1158.239 | 0        | -0.35503 | 0.137982 | -2.57303 | 0.011565 | 0.056607 | 1 |
| ENSG0000 | mucosal h | Inflamed | RP11-44F2 | lincRNA chr4     | 76006912 | 76009927 | - | 1033  | 53.86635 | 0.011933 | 0.621718 | 0.241666 | 2.572627 | 0.011577 | 0.056658 | 1 |
| ENSG0000 | mucosal h | Inflamed | GJC3      | protein_cc chr7  | 99520892 | 99527243 | - | 1116  | 2.286396 | 0.446301 | -0.43716 | 0.169951 | -2.57227 | 0.011589 | 0.056703 | 1 |
| ENSG0000 | mucosal h | Inflamed | MRAP      | protein_cc chr21 | 33664124 | 33687095 | + | 1346  | 3.770883 | 0.429594 | -0.56956 | 0.221449 | -2.57198 | 0.011598 | 0.056737 | 1 |
| ENSG0000 | mucosal h | Inflamed | KCTD4     | protein_cc chr13 | 45766988 | 45775175 | - | 2119  | 8.587112 | 0.286396 | 0.710582 | 0.276308 | 2.571701 | 0.011606 | 0.056769 | 1 |
| ENSG0000 | mucosal h | Inflamed | MRPL48    | protein_cc chr11 | 73498361 | 73576178 | + | 4386  | 553.0644 | 0        | 0.281288 | 0.109384 | 2.571567 | 0.011611 | 0.056779 | 1 |
| ENSG0000 | mucosal h | Inflamed | RP11-145M | lincRNA chr1     | 59522315 | 59553867 | + | 623   | 2.057279 | 0.53222  | -0.44761 | 0.174067 | -2.57147 | 0.011613 | 0.056782 | 1 |
| ENSG0000 | mucosal h | Inflamed | RP11-448C | sense_ove chr4   | 10069713 | 10074643 | - | 3510  | 187      | 0.00716  | 0.829514 | 0.322603 | 2.571317 | 0.011618 | 0.056796 | 1 |
| ENSG0000 | mucosal h | Inflamed | LGR5      | protein_cc chr12 | 71833550 | 71980090 | + | 5251  | 346.6277 | 0.009547 | 1.086111 | 0.422424 | 2.571139 | 0.011624 | 0.056804 | 1 |
| ENSG0000 | mucosal h | Inflamed | MGAT5     | protein_cc chr2  | 1.35E+08 | 1.35E+08 | + | 8578  | 5494.105 | 0        | 0.404672 | 0.157391 | 2.571124 | 0.011624 | 0.056804 | 1 |

|          |           |          |           |            |       |          |          |   |       |          |          |          |          |          |          |          |   |
|----------|-----------|----------|-----------|------------|-------|----------|----------|---|-------|----------|----------|----------|----------|----------|----------|----------|---|
| ENSG0000 | mucosal h | Inflamed | MOGAT2    | protein_cc | chr11 | 75428864 | 75444003 | + | 4010  | 4104.37  | 0        | 0.974064 | 0.378937 | 2.570518 | 0.011644 | 0.056881 | 1 |
| ENSG0000 | mucosal h | Inflamed | KIAA1191  | protein_cc | chr5  | 1.76E+08 | 1.76E+08 | - | 3973  | 3510.146 | 0        | 0.212685 | 0.082743 | 2.570426 | 0.011646 | 0.056881 | 1 |
| ENSG0000 | mucosal h | Inflamed | RP11-420C | lincRNA    | chr6  | 2854896  | 2881641  | - | 1455  | 64.5895  | 0.002387 | -0.55622 | 0.216393 | -2.57042 | 0.011647 | 0.056881 | 1 |
| ENSG0000 | mucosal h | Inflamed | TMEM254   | protein_cc | chr10 | 81838402 | 81852313 | + | 2996  | 1028.912 | 0        | 0.354872 | 0.138076 | 2.570115 | 0.011656 | 0.056917 | 1 |
| ENSG0000 | mucosal h | Inflamed | AC012456  | antisense  | chr2  | 11881123 | 11885427 | - | 561   | 1.420048 | 0.630072 | -0.36399 | 0.141647 | -2.56968 | 0.01167  | 0.056973 | 1 |
| ENSG0000 | mucosal h | Inflamed | CC2D1A    | protein_cc | chr19 | 14017014 | 14041692 | + | 5039  | 4299.406 | 0        | 0.361509 | 0.140703 | 2.56931  | 0.011682 | 0.057015 | 1 |
| ENSG0000 | mucosal h | Inflamed | C5orf30   | protein_cc | chr5  | 1.03E+08 | 1.03E+08 | + | 3568  | 1434.663 | 0        | 0.634047 | 0.246781 | 2.56927  | 0.011683 | 0.057015 | 1 |
| ENSG0000 | mucosal h | Inflamed | AC093323  | protein_cc | chr4  | 6693782  | 6694189  | - | 408   | 1.699284 | 0.544153 | 0.375197 | 0.146052 | 2.568935 | 0.011693 | 0.057057 | 1 |
| ENSG0000 | mucosal h | Inflamed | IQCA1     | protein_cc | chr2  | 2.37E+08 | 2.37E+08 | - | 5970  | 21.30788 | 0.042959 | -0.63355 | 0.246645 | -2.56865 | 0.011702 | 0.057088 | 1 |
| ENSG0000 | mucosal h | Inflamed | THPO      | protein_cc | chr3  | 1.84E+08 | 1.84E+08 | - | 1915  | 13.23628 | 0.0358   | -0.54966 | 0.213997 | -2.56853 | 0.011706 | 0.057088 | 1 |
| ENSG0000 | mucosal h | Inflamed | NAPSB     | pseudoger  | chr19 | 50837053 | 50848024 | - | 1915  | 504.9714 | 0        | -0.63808 | 0.248428 | -2.56849 | 0.011708 | 0.057088 | 1 |
| ENSG0000 | mucosal h | Inflamed | UBE2J1    | protein_cc | chr6  | 90036344 | 90062567 | - | 4290  | 5689.551 | 0        | -0.39741 | 0.154727 | -2.56845 | 0.011709 | 0.057088 | 1 |
| ENSG0000 | mucosal h | Inflamed | TMEM251   | protein_cc | chr14 | 93651296 | 93653434 | + | 1365  | 354.0692 | 0        | 0.312193 | 0.121566 | 2.568103 | 0.01172  | 0.057132 | 1 |
| ENSG0000 | mucosal h | Inflamed | SIRT6     | protein_cc | chr19 | 4174106  | 4182601  | - | 2787  | 2351.597 | 0        | 0.356622 | 0.138873 | 2.567983 | 0.011724 | 0.05714  | 1 |
| ENSG0000 | mucosal h | Inflamed | KBTBD12   | protein_cc | chr3  | 1.28E+08 | 1.28E+08 | + | 5818  | 185.463  | 0.019093 | 1.131909 | 0.440814 | 2.567771 | 0.01173  | 0.057162 | 1 |
| ENSG0000 | mucosal h | Inflamed | AC021860  | protein_cc | chr4  | 38628029 | 38666430 | - | 1896  | 11.38663 | 0.167064 | 0.673505 | 0.262324 | 2.56745  | 0.01174  | 0.057201 | 1 |
| ENSG0000 | mucosal h | Inflamed | IRF6      | protein_cc | chr1  | 2.1E+08  | 2.1E+08  | - | 4792  | 4016.432 | 0        | 0.670245 | 0.261065 | 2.56735  | 0.011744 | 0.057206 | 1 |
| ENSG0000 | mucosal h | Inflamed | TMEM164   | protein_cc | chrX  | 1.09E+08 | 1.09E+08 | + | 6583  | 6632.444 | 0        | 0.389114 | 0.151567 | 2.567272 | 0.011746 | 0.057207 | 1 |
| ENSG0000 | mucosal h | Inflamed | HPCAL1    | protein_cc | chr2  | 10443015 | 10567743 | + | 5675  | 3319.831 | 0        | 0.24942  | 0.097156 | 2.567203 | 0.011748 | 0.057207 | 1 |
| ENSG0000 | mucosal h | Inflamed | SNORA22   | snoRNA     | chr7  | 65220513 | 65220646 | + | 134   | 2.875895 | 0.329356 | 0.397273 | 0.154768 | 2.566888 | 0.011758 | 0.057245 | 1 |
| ENSG0000 | mucosal h | Inflamed | C9orf172  | protein_cc | chr9  | 1.4E+08  | 1.4E+08  | + | 2931  | 118.42   | 0.016706 | 0.524812 | 0.204479 | 2.566577 | 0.011768 | 0.057276 | 1 |
| ENSG0000 | mucosal h | Inflamed | CCDC47    | protein_cc | chr17 | 61822610 | 61853711 | - | 4537  | 3522.644 | 0        | 0.441829 | 0.172154 | 2.56648  | 0.011771 | 0.057276 | 1 |
| ENSG0000 | mucosal h | Inflamed | CTB-1290  | antisense  | chr5  | 1.8E+08  | 1.8E+08  | + | 393   | 22.69212 | 0.00716  | 0.494534 | 0.192692 | 2.566451 | 0.011772 | 0.057276 | 1 |
| ENSG0000 | mucosal h | Inflamed | PVRL1     | protein_cc | chr11 | 1.19E+08 | 1.2E+08  | - | 7701  | 3648.093 | 0        | 0.471197 | 0.183601 | 2.566418 | 0.011773 | 0.057276 | 1 |
| ENSG0000 | mucosal h | Inflamed | BMPR1A    | protein_cc | chr10 | 88516407 | 88692595 | + | 11360 | 811.6301 | 0        | 0.471214 | 0.183692 | 2.565233 | 0.011811 | 0.057421 | 1 |
| ENSG0000 | mucosal h | Inflamed | RP11-3791 | antisense  | chr7  | 35734824 | 35739023 | + | 4200  | 253.1671 | 0        | 0.446245 | 0.173961 | 2.565206 | 0.011812 | 0.057421 | 1 |
| ENSG0000 | mucosal h | Inflamed | SH3RF1    | protein_cc | chr4  | 1.7E+08  | 1.7E+08  | - | 5624  | 2323.993 | 0        | 0.491244 | 0.191507 | 2.565147 | 0.011814 | 0.057421 | 1 |
| ENSG0000 | mucosal h | Inflamed | SNAI3-AS1 | antisense  | chr16 | 88729706 | 88753594 | + | 5037  | 67.82578 | 0        | -0.3755  | 0.146385 | -2.56515 | 0.011814 | 0.057421 | 1 |
| ENSG0000 | mucosal h | Inflamed | RSL24D1P  | pseudoger  | chr6  | 27748398 | 27748890 | - | 493   | 0.825776 | 0.775656 | 0.246344 | 0.096035 | 2.565138 | 0.011814 | 0.057421 | 1 |
| ENSG0000 | mucosal h | Inflamed | RP11-4181 | lincRNA    | chr16 | 9560512  | 9611421  | + | 796   | 1.047733 | 0.75895  | 0.285719 | 0.11139  | 2.565038 | 0.011817 | 0.057422 | 1 |
| ENSG0000 | mucosal h | Inflamed | PANK3     | protein_cc | chr5  | 1.68E+08 | 1.68E+08 | - | 10580 | 3034.609 | 0        | 0.601064 | 0.234334 | 2.564991 | 0.011819 | 0.057422 | 1 |
| ENSG0000 | mucosal h | Inflamed | OR2S1P    | pseudoger  | chr9  | 36013181 | 36014130 | + | 950   | 15.86396 | 0.100239 | 0.61257  | 0.238885 | 2.56429  | 0.011841 | 0.05752  | 1 |
| ENSG0000 | mucosal h | Inflamed | ZHX2      | protein_cc | chr8  | 1.24E+08 | 1.24E+08 | + | 4714  | 1349.826 | 0        | -0.40239 | 0.156945 | -2.56391 | 0.011853 | 0.057566 | 1 |
| ENSG0000 | mucosal h | Inflamed | RP11-1111 | lincRNA    | chr11 | 76152382 | 76155700 | - | 754   | 93.18616 | 0        | 0.332727 | 0.129779 | 2.563803 | 0.011857 | 0.057566 | 1 |
| ENSG0000 | mucosal h | Inflamed | ZNF702P   | pseudoger  | chr19 | 53471504 | 53541151 | - | 4769  | 125.21   | 0        | 0.527399 | 0.205712 | 2.563775 | 0.011857 | 0.057566 | 1 |
| ENSG0000 | mucosal h | Inflamed | TSC22D3   | protein_cc | chrX  | 1.07E+08 | 1.07E+08 | - | 4766  | 2179.177 | 0        | -0.59761 | 0.233104 | -2.56372 | 0.011859 | 0.057566 | 1 |
| ENSG0000 | mucosal h | Inflamed | RP11-8047 | antisense  | chr11 | 60603469 | 60610438 | - | 501   | 0.968974 | 0.782816 | -0.30732 | 0.119879 | -2.56362 | 0.011862 | 0.057571 | 1 |
| ENSG0000 | mucosal h | Inflamed | PHTF1     | protein_cc | chr1  | 1.14E+08 | 1.14E+08 | - | 7170  | 453.0048 | 0        | -0.4533  | 0.176836 | -2.56338 | 0.01187  | 0.057592 | 1 |
| ENSG0000 | mucosal h | Inflamed | ARHGAP23  | protein_cc | chr17 | 36584662 | 36668628 | + | 8014  | 1278.532 | 0        | -0.6887  | 0.268671 | -2.56335 | 0.011871 | 0.057592 | 1 |
| ENSG0000 | mucosal h | Inflamed | C11orf53  | protein_cc | chr11 | 1.11E+08 | 1.11E+08 | + | 1205  | 77.15274 | 0.004773 | 0.56461  | 0.220273 | 2.563227 | 0.011875 | 0.0576   | 1 |

|          |           |          |           |            |       |          |          |   |       |          |          |          |          |          |          |          |   |
|----------|-----------|----------|-----------|------------|-------|----------|----------|---|-------|----------|----------|----------|----------|----------|----------|----------|---|
| ENSG0000 | mucosal h | Inflamed | ABCC3     | protein_cc | chr17 | 48712138 | 48769613 | + | 9614  | 13404.61 | 0        | 0.454652 | 0.177397 | 2.562902 | 0.011885 | 0.05764  | 1 |
| ENSG0000 | mucosal h | Inflamed | POLE      | protein_cc | chr12 | 1.33E+08 | 1.33E+08 | - | 16605 | 2708.928 | 0        | 0.380048 | 0.148292 | 2.562837 | 0.011888 | 0.05764  | 1 |
| ENSG0000 | mucosal h | Inflamed | SDC1      | protein_cc | chr2  | 20400558 | 20425194 | - | 3595  | 16358.19 | 0        | -0.35618 | 0.138995 | -2.56255 | 0.011897 | 0.057672 | 1 |
| ENSG0000 | mucosal h | Inflamed | KCNIP4    | protein_cc | chr4  | 20730239 | 21950422 | - | 4112  | 16.5537  | 0.112172 | 0.839388 | 0.327572 | 2.562451 | 0.0119   | 0.057672 | 1 |
| ENSG0000 | mucosal h | Inflamed | HNF4A     | protein_cc | chr20 | 42984340 | 43061485 | + | 5560  | 13506.55 | 0        | 0.764753 | 0.298455 | 2.562372 | 0.011902 | 0.057672 | 1 |
| ENSG0000 | mucosal h | Inflamed | CAPN14    | protein_cc | chr2  | 31395924 | 31456724 | - | 4021  | 19.59666 | 0.102625 | -0.75259 | 0.29371  | -2.56235 | 0.011903 | 0.057672 | 1 |
| ENSG0000 | mucosal h | Inflamed | ZNF502    | protein_cc | chr3  | 44754135 | 44765323 | + | 3273  | 105.3317 | 0.002387 | 0.632559 | 0.246895 | 2.56206  | 0.011912 | 0.057701 | 1 |
| ENSG0000 | mucosal h | Inflamed | CCDC78    | protein_cc | chr16 | 772582   | 776954   | - | 4147  | 32.05251 | 0.023866 | -0.64044 | 0.249974 | -2.56203 | 0.011913 | 0.057701 | 1 |
| ENSG0000 | mucosal h | Inflamed | KCNE4     | protein_cc | chr2  | 2.24E+08 | 2.24E+08 | + | 4124  | 142.0024 | 0.002387 | -0.53456 | 0.208653 | -2.56195 | 0.011916 | 0.057703 | 1 |
| ENSG0000 | mucosal h | Inflamed | RP11-342E | antisense  | chr10 | 33500205 | 33502732 | + | 781   | 2.315036 | 0.484487 | -0.46426 | 0.181257 | -2.56134 | 0.011936 | 0.057788 | 1 |
| ENSG0000 | mucosal h | Inflamed | KRT16P2   | pseudoger  | chr17 | 16733313 | 16736147 | - | 1805  | 3.221957 | 0.711217 | -0.64374 | 0.251359 | -2.56105 | 0.011945 | 0.057813 | 1 |
| ENSG0000 | mucosal h | Inflamed | RP11-554A | sense_ove  | chr11 | 68768233 | 68769516 | - | 1284  | 55.83055 | 0.00716  | -0.78872 | 0.307975 | -2.56097 | 0.011947 | 0.057813 | 1 |
| ENSG0000 | mucosal h | Inflamed | TRBV5-5   | TR_V_gene  | chr7  | 1.42E+08 | 1.42E+08 | - | 350   | 5.902148 | 0.181384 | -0.52202 | 0.20384  | -2.56093 | 0.011949 | 0.057813 | 1 |
| ENSG0000 | mucosal h | Inflamed | RP11-673E | lincRNA    | chr4  | 1.45E+08 | 1.45E+08 | + | 1921  | 1.570406 | 0.644391 | 0.373927 | 0.146013 | 2.560906 | 0.01195  | 0.057813 | 1 |
| ENSG0000 | mucosal h | Inflamed | ELMO3     | protein_cc | chr16 | 67233014 | 67237932 | + | 2575  | 2091.129 | 0        | 0.416359 | 0.162614 | 2.56041  | 0.011966 | 0.057879 | 1 |
| ENSG0000 | mucosal h | Inflamed | CTD-3105  | antisense  | chr19 | 12561749 | 12571519 | + | 695   | 1.983294 | 0.565632 | 0.441552 | 0.172471 | 2.560157 | 0.011974 | 0.057898 | 1 |
| ENSG0000 | mucosal h | Inflamed | RPS15AP1  | pseudoger  | chr1  | 46111488 | 46111869 | - | 382   | 8.799523 | 0.145585 | 0.613459 | 0.239618 | 2.560154 | 0.011974 | 0.057898 | 1 |
| ENSG0000 | mucosal h | Inflamed | CTD-2528  | lincRNA    | chr19 | 38219487 | 38221544 | - | 1360  | 44.11695 | 0.023866 | 0.678974 | 0.265217 | 2.560069 | 0.011977 | 0.057901 | 1 |
| ENSG0000 | mucosal h | Inflamed | RP11-963  | lincRNA    | chr17 | 10752858 | 10784212 | + | 774   | 9.892601 | 0.102625 | 0.543133 | 0.212163 | 2.559982 | 0.011979 | 0.057904 | 1 |
| ENSG0000 | mucosal h | Inflamed | AC027228  | protein_cc | chr15 | 78830023 | 78831288 | + | 1266  | 1.806683 | 0.553699 | 0.373474 | 0.145921 | 2.559419 | 0.011998 | 0.057968 | 1 |
| ENSG0000 | mucosal h | Inflamed | LRRC19    | protein_cc | chr9  | 26993134 | 27005691 | - | 3609  | 1371.594 | 0.004773 | 0.995699 | 0.389039 | 2.55938  | 0.011999 | 0.057968 | 1 |
| ENSG0000 | mucosal h | Inflamed | LY6G5B    | protein_cc | chr6  | 31637944 | 31641553 | + | 3031  | 155.9379 | 0.023866 | 0.727972 | 0.284435 | 2.559362 | 0.011999 | 0.057968 | 1 |
| ENSG0000 | mucosal h | Inflamed | RP11-187E | protein_cc | chr14 | 32414059 | 32419588 | + | 550   | 19.58473 | 0.023866 | 0.508505 | 0.198704 | 2.559105 | 0.012008 | 0.057998 | 1 |
| ENSG0000 | mucosal h | Inflamed | C5orf52   | protein_cc | chr5  | 1.57E+08 | 1.57E+08 | + | 686   | 47.47494 | 0.011933 | 0.479385 | 0.18733  | 2.559034 | 0.01201  | 0.057998 | 1 |
| ENSG0000 | mucosal h | Inflamed | AP001063  | lincRNA    | chr21 | 45767650 | 45768178 | - | 529   | 1.238663 | 0.711217 | -0.4169  | 0.162937 | -2.55862 | 0.012023 | 0.058046 | 1 |
| ENSG0000 | mucosal h | Inflamed | GGN       | protein_cc | chr19 | 38874905 | 38878722 | - | 2447  | 20.86635 | 0.033413 | -0.61759 | 0.241378 | -2.55859 | 0.012024 | 0.058046 | 1 |
| ENSG0000 | mucosal h | Inflamed | RP11-202C | lincRNA    | chr9  | 1.14E+08 | 1.14E+08 | - | 744   | 2.699284 | 0.455847 | -0.49177 | 0.192263 | -2.55778 | 0.012051 | 0.058163 | 1 |
| ENSG0000 | mucosal h | Inflamed | CTA-228A  | lincRNA    | chr22 | 38486134 | 38487566 | + | 1433  | 24.54893 | 0.052506 | 0.593029 | 0.231881 | 2.557477 | 0.01206  | 0.058199 | 1 |
| ENSG0000 | mucosal h | Inflamed | MLEC      | protein_cc | chr12 | 1.21E+08 | 1.21E+08 | + | 6723  | 31980.8  | 0        | 0.327354 | 0.128014 | 2.557171 | 0.01207  | 0.058237 | 1 |
| ENSG0000 | mucosal h | Inflamed | DYNLL2    | protein_cc | chr17 | 56160776 | 56172897 | + | 6805  | 5741.415 | 0        | 0.281134 | 0.109948 | 2.556984 | 0.012077 | 0.058255 | 1 |
| ENSG0000 | mucosal h | Inflamed | BDNF      | protein_cc | chr11 | 27676440 | 27743605 | - | 7740  | 35.54654 | 0.033413 | -0.74751 | 0.292384 | -2.5566  | 0.012089 | 0.058298 | 1 |
| ENSG0000 | mucosal h | Inflamed | RP11-482M | lincRNA    | chr16 | 87526161 | 87549241 | + | 1356  | 7.735084 | 0.126492 | 0.512938 | 0.200639 | 2.556516 | 0.012092 | 0.058298 | 1 |
| ENSG0000 | mucosal h | Inflamed | EGFLAM    | protein_cc | chr5  | 38258511 | 38465123 | + | 5724  | 322.4749 | 0.002387 | -0.73187 | 0.286278 | -2.55651 | 0.012092 | 0.058298 | 1 |
| ENSG0000 | mucosal h | Inflamed | KIF13A    | protein_cc | chr6  | 17759414 | 17987854 | - | 11016 | 2238.477 | 0        | 0.417004 | 0.163132 | 2.556233 | 0.012101 | 0.058328 | 1 |
| ENSG0000 | mucosal h | Inflamed | GNRH1     | protein_cc | chr8  | 25276776 | 25282170 | - | 1762  | 84.77566 | 0.00716  | 0.777264 | 0.304072 | 2.55618  | 0.012103 | 0.058328 | 1 |
| ENSG0000 | mucosal h | Inflamed | SBF2-AS1  | antisense  | chr11 | 9779839  | 9832866  | + | 3977  | 106.1671 | 0        | 0.389771 | 0.152496 | 2.555934 | 0.012111 | 0.058354 | 1 |
| ENSG0000 | mucosal h | Inflamed | CCNE1     | protein_cc | chr19 | 30302805 | 30315215 | + | 2568  | 241.2411 | 0        | -0.30668 | 0.119989 | -2.55588 | 0.012112 | 0.058354 | 1 |
| ENSG0000 | mucosal h | Inflamed | AP006216  | antisense  | chr11 | 1.17E+08 | 1.17E+08 | + | 563   | 1.078759 | 0.778043 | -0.28119 | 0.110051 | -2.55511 | 0.012138 | 0.058464 | 1 |
| ENSG0000 | mucosal h | Inflamed | AP000692  | antisense  | chr21 | 37692090 | 37692968 | - | 879   | 8.97852  | 0.045346 | -0.41698 | 0.163203 | -2.55495 | 0.012143 | 0.058467 | 1 |
| ENSG0000 | mucosal h | Inflamed | EVA1A     | protein_cc | chr2  | 75696428 | 75796848 | - | 2744  | 90.8568  | 0        | -0.65533 | 0.256494 | -2.55494 | 0.012143 | 0.058467 | 1 |

|          |           |          |           |            |       |          |          |   |       |          |          |          |          |          |          |          |   |
|----------|-----------|----------|-----------|------------|-------|----------|----------|---|-------|----------|----------|----------|----------|----------|----------|----------|---|
| ENSG0000 | mucosal h | Inflamed | GAS2L3    | protein_cc | chr12 | 1.01E+08 | 1.01E+08 | + | 6698  | 321.0979 | 0.002387 | 0.674645 | 0.264061 | 2.554887 | 0.012145 | 0.058467 | 1 |
| ENSG0000 | mucosal h | Inflamed | SNORA2    | snoRNA     | chr6  | 1.5E+08  | 1.5E+08  | + | 135   | 3.448687 | 0.245823 | 0.434293 | 0.169996 | 2.554733 | 0.01215  | 0.058481 | 1 |
| ENSG0000 | mucosal h | Inflamed | CTD-2235C | lincRNA    | chr5  | 74659585 | 74660067 | + | 483   | 3.093079 | 0.365155 | 0.403595 | 0.158008 | 2.554269 | 0.012165 | 0.058539 | 1 |
| ENSG0000 | mucosal h | Inflamed | ARSB      | protein_cc | chr5  | 78073032 | 78281910 | - | 7189  | 925.5609 | 0        | -0.3208  | 0.125597 | -2.55423 | 0.012166 | 0.058539 | 1 |
| ENSG0000 | mucosal h | Inflamed | LLGL2     | protein_cc | chr17 | 73521161 | 73571289 | + | 7909  | 12768.12 | 0        | 0.499172 | 0.195458 | 2.553853 | 0.012179 | 0.058587 | 1 |
| ENSG0000 | mucosal h | Inflamed | ZSCAN23   | protein_cc | chr6  | 28399707 | 28411279 | - | 3283  | 9.429594 | 0.119332 | 0.641    | 0.25101  | 2.553683 | 0.012184 | 0.058603 | 1 |
| ENSG0000 | mucosal h | Inflamed | NFKBIA    | protein_cc | chr14 | 35870717 | 35873955 | - | 2373  | 4742.599 | 0        | -0.43276 | 0.169493 | -2.55328 | 0.012197 | 0.058642 | 1 |
| ENSG0000 | mucosal h | Inflamed | AC018766  | antisense  | chr19 | 50356144 | 50358224 | - | 484   | 2.77327  | 0.417661 | 0.447625 | 0.175317 | 2.553236 | 0.012199 | 0.058642 | 1 |
| ENSG0000 | mucosal h | Inflamed | CDC42BPA  | protein_cc | chr1  | 2.27E+08 | 2.28E+08 | - | 14055 | 2427.167 | 0        | 0.492481 | 0.192885 | 2.553235 | 0.012199 | 0.058642 | 1 |
| ENSG0000 | mucosal h | Inflamed | RASEF     | protein_cc | chr9  | 85594500 | 85678092 | - | 6649  | 1798.592 | 0        | 0.8161   | 0.319653 | 2.553085 | 0.012204 | 0.058654 | 1 |
| ENSG0000 | mucosal h | Inflamed | PDGFA     | protein_cc | chr7  | 536895   | 559933   | - | 4151  | 1452.513 | 0        | 0.385719 | 0.151095 | 2.55282  | 0.012213 | 0.058678 | 1 |
| ENSG0000 | mucosal h | Inflamed | OR7E12P   | pseudoger  | chr11 | 3412010  | 3412982  | - | 973   | 1.560859 | 0.720764 | -0.49123 | 0.192432 | -2.55276 | 0.012215 | 0.058678 | 1 |
| ENSG0000 | mucosal h | Inflamed | ARSG      | protein_cc | chr17 | 66255323 | 66418872 | + | 6587  | 171.0406 | 0        | -0.48732 | 0.190901 | -2.55273 | 0.012215 | 0.058678 | 1 |
| ENSG0000 | mucosal h | Inflamed | NNT       | protein_cc | chr5  | 43602794 | 43707507 | + | 8245  | 2477.217 | 0        | 0.41922  | 0.164231 | 2.552621 | 0.012219 | 0.058685 | 1 |
| ENSG0000 | mucosal h | Inflamed | GRIA1     | protein_cc | chr5  | 1.53E+08 | 1.53E+08 | + | 7636  | 24.35084 | 0.057279 | 0.799777 | 0.313327 | 2.552529 | 0.012222 | 0.058686 | 1 |
| ENSG0000 | mucosal h | Inflamed | ZFP92     | protein_cc | chrX  | 1.53E+08 | 1.53E+08 | + | 1253  | 14.80191 | 0.057279 | -0.60283 | 0.236174 | -2.55248 | 0.012224 | 0.058686 | 1 |
| ENSG0000 | mucosal h | Inflamed | RP11-129J | lincRNA    | chr10 | 1.01E+08 | 1.01E+08 | + | 392   | 3.76611  | 0.291169 | -0.43448 | 0.170224 | -2.55238 | 0.012227 | 0.05869  | 1 |
| ENSG0000 | mucosal h | Inflamed | AL122127. | miRNA      | chr14 | 1.06E+08 | 1.06E+08 | - | 67    | 75.40573 | 0.042959 | -0.8616  | 0.337576 | -2.55231 | 0.012229 | 0.058692 | 1 |
| ENSG0000 | mucosal h | Inflamed | RP11-2761 | antisense  | chr1  | 16481706 | 16483824 | + | 904   | 52.90215 | 0.004773 | 0.515199 | 0.201875 | 2.552061 | 0.012238 | 0.05872  | 1 |
| ENSG0000 | mucosal h | Inflamed | PPAPDC2   | protein_cc | chr9  | 4662298  | 4665256  | + | 2959  | 750.4988 | 0        | 0.379891 | 0.148865 | 2.551907 | 0.012243 | 0.058733 | 1 |
| ENSG0000 | mucosal h | Inflamed | SOX1      | protein_cc | chr13 | 1.13E+08 | 1.13E+08 | + | 4108  | 1.935561 | 0.541766 | 0.414656 | 0.162527 | 2.551306 | 0.012262 | 0.058818 | 1 |
| ENSG0000 | mucosal h | Inflamed | ITM2C     | protein_cc | chr2  | 2.32E+08 | 2.32E+08 | + | 2611  | 59703.79 | 0        | 0.457975 | 0.179515 | 2.551187 | 0.012266 | 0.058819 | 1 |
| ENSG0000 | mucosal h | Inflamed | MCUR1     | protein_cc | chr6  | 13786789 | 13814800 | - | 6057  | 1474.881 | 0        | 0.263027 | 0.103101 | 2.551161 | 0.012267 | 0.058819 | 1 |
| ENSG0000 | mucosal h | Inflamed | MDK       | protein_cc | chr11 | 46402306 | 46405375 | + | 2170  | 3987.737 | 0        | -0.42419 | 0.166305 | -2.55069 | 0.012283 | 0.058882 | 1 |
| ENSG0000 | mucosal h | Inflamed | RPS15AP6  | pseudoger  | chr1  | 21330043 | 21330427 | - | 385   | 0.811456 | 0.792363 | 0.30638  | 0.120123 | 2.550544 | 0.012288 | 0.058894 | 1 |
| ENSG0000 | mucosal h | Inflamed | PEBP1     | protein_cc | chr12 | 1.19E+08 | 1.19E+08 | + | 1780  | 6126.933 | 0        | 0.265885 | 0.104249 | 2.550486 | 0.012289 | 0.058894 | 1 |
| ENSG0000 | mucosal h | Inflamed | CDH15     | protein_cc | chr16 | 89238175 | 89261900 | + | 4628  | 9.057279 | 0.069212 | -0.51169 | 0.20064  | -2.55031 | 0.012295 | 0.0589   | 1 |
| ENSG0000 | mucosal h | Inflamed | CTD-31051 | lincRNA    | chr19 | 12456763 | 12458752 | - | 1990  | 7.789976 | 0.073986 | 0.439978 | 0.172523 | 2.550263 | 0.012297 | 0.0589   | 1 |
| ENSG0000 | mucosal h | Inflamed | RP11-6691 | lincRNA    | chr4  | 14166079 | 14244437 | + | 649   | 1.420048 | 0.670644 | -0.42637 | 0.167193 | -2.55019 | 0.012299 | 0.0589   | 1 |
| ENSG0000 | mucosal h | Inflamed | PLD5      | protein_cc | chr1  | 2.42E+08 | 2.43E+08 | - | 9545  | 2.288783 | 0.572792 | 0.449425 | 0.176233 | 2.550173 | 0.0123   | 0.0589   | 1 |
| ENSG0000 | mucosal h | Inflamed | CLEC7A    | protein_cc | chr12 | 10269376 | 10282857 | - | 4190  | 497.5012 | 0        | -0.72277 | 0.28344  | -2.55001 | 0.012305 | 0.058914 | 1 |
| ENSG0000 | mucosal h | Inflamed | DDC       | protein_cc | chr7  | 50526134 | 50633154 | - | 3119  | 1493.537 | 0.004773 | 0.803387 | 0.31506  | 2.54995  | 0.012307 | 0.058914 | 1 |
| ENSG0000 | mucosal h | Inflamed | AC108142  | antisense  | chr4  | 1.83E+08 | 1.83E+08 | - | 5551  | 6.221957 | 0.415274 | -0.74401 | 0.291801 | -2.54972 | 0.012315 | 0.05894  | 1 |
| ENSG0000 | mucosal h | Inflamed | AF121897. | pseudoger  | chr21 | 40897510 | 40901782 | + | 3980  | 1.658711 | 0.577566 | 0.403524 | 0.158307 | 2.548994 | 0.012339 | 0.059044 | 1 |
| ENSG0000 | mucosal h | Inflamed | RP5-1142J | lincRNA    | chr7  | 1.57E+08 | 1.57E+08 | - | 565   | 6.973747 | 0.205251 | -0.63165 | 0.247822 | -2.5488  | 0.012345 | 0.059065 | 1 |
| ENSG0000 | mucosal h | Inflamed | IL23R     | protein_cc | chr1  | 67632083 | 67725662 | + | 2995  | 36.15274 | 0.002387 | 0.555224 | 0.217853 | 2.548621 | 0.012351 | 0.059081 | 1 |
| ENSG0000 | mucosal h | Inflamed | SLC6A2    | protein_cc | chr16 | 55689516 | 55740104 | + | 5463  | 3.918854 | 0.431981 | 0.589111 | 0.231155 | 2.548559 | 0.012353 | 0.059081 | 1 |
| ENSG0000 | mucosal h | Inflamed | RP11-401F | lincRNA    | chr16 | 50679720 | 50683160 | + | 3441  | 76.57995 | 0.01432  | 0.681728 | 0.267517 | 2.548354 | 0.01236  | 0.05909  | 1 |
| ENSG0000 | mucosal h | Inflamed | LINC00674 | pseudoger  | chr17 | 66098049 | 66111659 | + | 734   | 101.6897 | 0        | 0.289079 | 0.113439 | 2.548321 | 0.012361 | 0.05909  | 1 |
| ENSG0000 | mucosal h | Inflamed | SCARNA4   | snoRNA     | chr1  | 1.56E+08 | 1.56E+08 | - | 129   | 1.205251 | 0.658711 | 0.319778 | 0.125487 | 2.5483   | 0.012362 | 0.05909  | 1 |

|          |           |          |           |            |       |          |          |   |       |          |          |          |          |          |          |          |   |
|----------|-----------|----------|-----------|------------|-------|----------|----------|---|-------|----------|----------|----------|----------|----------|----------|----------|---|
| ENSG0000 | mucosal h | Inflamed | C11orf70  | protein_cc | chr11 | 1.02E+08 | 1.02E+08 | + | 2647  | 9.245823 | 0.071599 | -0.54794 | 0.215052 | -2.54792 | 0.012374 | 0.059138 | 1 |
| ENSG0000 | mucosal h | Inflamed | RP5-1103C | antisense  | chr20 | 300957   | 328868   | - | 875   | 99.53938 | 0        | 0.39553  | 0.15524  | 2.547863 | 0.012376 | 0.059138 | 1 |
| ENSG0000 | mucosal h | Inflamed | RP11-346I | lincRNA    | chr8  | 67331824 | 67341212 | - | 4366  | 5.763723 | 0.171838 | 0.5058   | 0.198534 | 2.547671 | 0.012383 | 0.059157 | 1 |
| ENSG0000 | mucosal h | Inflamed | RP11-66B2 | lincRNA    | chr15 | 1.01E+08 | 1.01E+08 | + | 3907  | 4.011933 | 0.26253  | 0.400992 | 0.157412 | 2.547405 | 0.012392 | 0.05918  | 1 |
| ENSG0000 | mucosal h | Inflamed | CYP2R1    | protein_cc | chr11 | 14899553 | 14913798 | - | 3949  | 450.5919 | 0        | 0.485894 | 0.190742 | 2.547387 | 0.012392 | 0.05918  | 1 |
| ENSG0000 | mucosal h | Inflamed | ZNF675    | protein_cc | chr19 | 23708433 | 23870022 | - | 6785  | 237.6086 | 0        | 0.537023 | 0.210818 | 2.547327 | 0.012394 | 0.05918  | 1 |
| ENSG0000 | mucosal h | Inflamed | C9orf78   | protein_cc | chr9  | 1.33E+08 | 1.33E+08 | - | 5099  | 1192.936 | 0        | 0.279362 | 0.109677 | 2.547128 | 0.012401 | 0.059201 | 1 |
| ENSG0000 | mucosal h | Inflamed | DEFB1     | protein_cc | chr8  | 6728097  | 6735544  | - | 478   | 132.7924 | 0.011933 | 0.776829 | 0.304995 | 2.547019 | 0.012404 | 0.059207 | 1 |
| ENSG0000 | mucosal h | Inflamed | CTB-118N  | lincRNA    | chr5  | 1.16E+08 | 1.16E+08 | + | 482   | 5.663484 | 0.152745 | 0.458608 | 0.180068 | 2.546858 | 0.01241  | 0.059211 | 1 |
| ENSG0000 | mucosal h | Inflamed | LINC00663 | lincRNA    | chr19 | 19868175 | 19887232 | - | 4334  | 50.90453 | 0.00716  | 0.378094 | 0.148456 | 2.546838 | 0.012411 | 0.059211 | 1 |
| ENSG0000 | mucosal h | Inflamed | AC139100  | protein_cc | chr18 | 77905807 | 77936315 | + | 4589  | 34.70167 | 0        | 0.359762 | 0.141261 | 2.546795 | 0.012412 | 0.059211 | 1 |
| ENSG0000 | mucosal h | Inflamed | SVOP      | protein_cc | chr12 | 1.09E+08 | 1.09E+08 | - | 3968  | 12.09308 | 0.073986 | 0.582021 | 0.228554 | 2.546538 | 0.012421 | 0.059241 | 1 |
| ENSG0000 | mucosal h | Inflamed | ST7-OT4   | protein_cc | chr7  | 1.17E+08 | 1.17E+08 | + | 2664  | 2.200477 | 0.463007 | 0.38057  | 0.149471 | 2.546116 | 0.012435 | 0.059294 | 1 |
| ENSG0000 | mucosal h | Inflamed | RP11-273E | antisense  | chr12 | 7281675  | 7283794  | - | 1179  | 5.410501 | 0.21957  | -0.53522 | 0.210216 | -2.54607 | 0.012436 | 0.059294 | 1 |
| ENSG0000 | mucosal h | Inflamed | CTD-2541I | lincRNA    | chr8  | 6473125  | 6474719  | - | 1595  | 4.011933 | 0.360382 | 0.424886 | 0.166892 | 2.54587  | 0.012443 | 0.059315 | 1 |
| ENSG0000 | mucosal h | Inflamed | WHSC1     | protein_cc | chr4  | 1873151  | 1983934  | + | 19776 | 4687.885 | 0        | 0.354347 | 0.139194 | 2.545715 | 0.012448 | 0.059322 | 1 |
| ENSG0000 | mucosal h | Inflamed | EBF3      | protein_cc | chr10 | 1.32E+08 | 1.32E+08 | - | 4623  | 64.13604 | 0.059666 | -0.95862 | 0.376569 | -2.54568 | 0.012449 | 0.059322 | 1 |
| ENSG0000 | mucosal h | Inflamed | CHST4     | protein_cc | chr16 | 71559136 | 71572649 | + | 2669  | 23.27446 | 0.365155 | -1.08465 | 0.426083 | -2.54562 | 0.012451 | 0.059322 | 1 |
| ENSG0000 | mucosal h | Inflamed | MSH5-SAP  | protein_cc | chr6  | 31707797 | 31732628 | + | 4140  | 12.43437 | 0.064439 | 0.523705 | 0.20575  | 2.545352 | 0.01246  | 0.059354 | 1 |
| ENSG0000 | mucosal h | Inflamed | CTA-204B2 | antisense  | chr8  | 1.42E+08 | 1.42E+08 | - | 2231  | 75.7327  | 0.023866 | 0.541151 | 0.212616 | 2.545204 | 0.012465 | 0.059367 | 1 |
| ENSG0000 | mucosal h | Inflamed | TOE1      | protein_cc | chr1  | 45805342 | 45809647 | + | 2742  | 563.9189 | 0        | 0.206503 | 0.081148 | 2.544773 | 0.012479 | 0.059425 | 1 |
| ENSG0000 | mucosal h | Inflamed | NR1H3     | protein_cc | chr11 | 47269851 | 47290396 | + | 4346  | 1380.709 | 0        | -0.27949 | 0.109845 | -2.54441 | 0.012492 | 0.059472 | 1 |
| ENSG0000 | mucosal h | Inflamed | FOXJ3     | protein_cc | chr1  | 42642210 | 42801548 | - | 6893  | 2105.131 | 0        | 0.462957 | 0.181968 | 2.544172 | 0.0125   | 0.0595   | 1 |
| ENSG0000 | mucosal h | Inflamed | SLC35D2   | protein_cc | chr9  | 99082988 | 99145992 | - | 2203  | 2019.315 | 0        | 0.321532 | 0.126402 | 2.543721 | 0.012515 | 0.059561 | 1 |
| ENSG0000 | mucosal h | Inflamed | RAPGEF5   | protein_cc | chr7  | 22157856 | 22396763 | - | 10245 | 1035.067 | 0        | 0.593476 | 0.233331 | 2.543493 | 0.012522 | 0.059585 | 1 |
| ENSG0000 | mucosal h | Inflamed | MUM1      | protein_cc | chr19 | 1285890  | 1378430  | + | 10249 | 2355.652 | 0        | 0.270281 | 0.106266 | 2.543432 | 0.012524 | 0.059585 | 1 |
| ENSG0000 | mucosal h | Inflamed | KRTAP5-A5 | antisense  | chr11 | 1592583  | 1620414  | + | 2931  | 140.3795 | 0.00716  | 0.639718 | 0.25153  | 2.543305 | 0.012529 | 0.059595 | 1 |
| ENSG0000 | mucosal h | Inflamed | ACSF3     | protein_cc | chr16 | 89154783 | 89222254 | + | 11629 | 2001.959 | 0        | 0.246191 | 0.09682  | 2.542775 | 0.012547 | 0.059669 | 1 |
| ENSG0000 | mucosal h | Inflamed | CDK10     | protein_cc | chr16 | 89747145 | 89762772 | + | 6791  | 2399.248 | 0        | 0.290531 | 0.114276 | 2.542371 | 0.01256  | 0.059723 | 1 |
| ENSG0000 | mucosal h | Inflamed | ARSJ      | protein_cc | chr4  | 1.15E+08 | 1.15E+08 | - | 5024  | 283.9356 | 0.002387 | 0.584909 | 0.230075 | 2.542255 | 0.012564 | 0.059731 | 1 |
| ENSG0000 | mucosal h | Inflamed | GAS1      | protein_cc | chr9  | 89559279 | 89562104 | - | 2826  | 472.2124 | 0.011933 | -1.39382 | 0.548321 | -2.54197 | 0.012574 | 0.059765 | 1 |
| ENSG0000 | mucosal h | Inflamed | RGAG1     | protein_cc | chrX  | 1.1E+08  | 1.1E+08  | + | 5529  | 5.689737 | 0.212411 | 0.619008 | 0.243529 | 2.541823 | 0.012579 | 0.059778 | 1 |
| ENSG0000 | mucosal h | Inflamed | LINC00619 | lincRNA    | chr10 | 44340754 | 44346070 | + | 1121  | 1.238663 | 0.689737 | -0.38067 | 0.149772 | -2.54167 | 0.012584 | 0.059788 | 1 |
| ENSG0000 | mucosal h | Inflamed | PHF19     | protein_cc | chr9  | 1.24E+08 | 1.24E+08 | - | 6547  | 1321.506 | 0        | -0.31138 | 0.12251  | -2.54163 | 0.012585 | 0.059788 | 1 |
| ENSG0000 | mucosal h | Inflamed | AC004893  | antisense  | chr7  | 98610788 | 98645863 | + | 4194  | 110.5346 | 0.002387 | 0.331533 | 0.130484 | 2.540792 | 0.012613 | 0.059911 | 1 |
| ENSG0000 | mucosal h | Inflamed | MRPS9     | protein_cc | chr2  | 1.06E+08 | 1.06E+08 | + | 1915  | 692.926  | 0        | 0.344354 | 0.135539 | 2.540628 | 0.012619 | 0.059912 | 1 |
| ENSG0000 | mucosal h | Inflamed | HEXIM2    | protein_cc | chr17 | 43238067 | 43247407 | + | 2038  | 158.6969 | 0        | -0.31685 | 0.124715 | -2.54059 | 0.01262  | 0.059912 | 1 |
| ENSG0000 | mucosal h | Inflamed | SCAMP2    | protein_cc | chr15 | 75136071 | 75165706 | - | 5000  | 11233.87 | 0        | 0.243196 | 0.095727 | 2.540518 | 0.012623 | 0.059912 | 1 |
| ENSG0000 | mucosal h | Inflamed | THSD7A    | protein_cc | chr7  | 11409984 | 11871824 | - | 10923 | 96.23628 | 0.023866 | -0.69948 | 0.275331 | -2.54052 | 0.012623 | 0.059912 | 1 |
| ENSG0000 | mucosal h | Inflamed | HYPK      | protein_cc | chr15 | 44088340 | 44095241 | + | 6393  | 653.6468 | 0        | 0.28878  | 0.113692 | 2.540028 | 0.012639 | 0.05998  | 1 |

|          |           |          |           |            |       |          |          |   |       |          |          |          |          |          |          |          |   |
|----------|-----------|----------|-----------|------------|-------|----------|----------|---|-------|----------|----------|----------|----------|----------|----------|----------|---|
| ENSG0000 | mucosal h | Inflamed | HHAT      | protein_cc | chr1  | 2.11E+08 | 2.11E+08 | + | 4296  | 207.3174 | 0        | 0.346103 | 0.13629  | 2.539468 | 0.012658 | 0.060059 | 1 |
| ENSG0000 | mucosal h | Inflamed | GLOD4     | protein_cc | chr17 | 660337   | 685581   | - | 4951  | 1727.019 | 0        | 0.301474 | 0.118721 | 2.539353 | 0.012662 | 0.060067 | 1 |
| ENSG0000 | mucosal h | Inflamed | TM4SF18   | protein_cc | chr3  | 1.49E+08 | 1.49E+08 | - | 4482  | 149.8902 | 0.002387 | -0.57856 | 0.22786  | -2.53912 | 0.01267  | 0.060093 | 1 |
| ENSG0000 | mucosal h | Inflamed | SNAP47    | protein_cc | chr1  | 2.28E+08 | 2.28E+08 | + | 6542  | 823.0764 | 0        | -0.21932 | 0.086411 | -2.53814 | 0.012703 | 0.06024  | 1 |
| ENSG0000 | mucosal h | Inflamed | ALPK3     | protein_cc | chr15 | 85359911 | 85416713 | + | 10940 | 448.3628 | 0.002387 | -0.75534 | 0.297603 | -2.53808 | 0.012706 | 0.06024  | 1 |
| ENSG0000 | mucosal h | Inflamed | EDN2      | protein_cc | chr1  | 41944446 | 41950344 | - | 1639  | 104.0143 | 0.038186 | 0.982545 | 0.387201 | 2.537559 | 0.012723 | 0.060313 | 1 |
| ENSG0000 | mucosal h | Inflamed | HHEX      | protein_cc | chr10 | 94447945 | 94455403 | + | 4772  | 378.5585 | 0        | -0.52113 | 0.205402 | -2.53712 | 0.012738 | 0.060372 | 1 |
| ENSG0000 | mucosal h | Inflamed | HCG4B     | pseudoger  | chr6  | 29893760 | 29894750 | - | 991   | 6.157518 | 0.159905 | 0.4994   | 0.196842 | 2.537057 | 0.01274  | 0.060372 | 1 |
| ENSG0000 | mucosal h | Inflamed | RP5-887A1 | lincRNA    | chr1  | 81001440 | 81112473 | + | 709   | 21.14797 | 0.066826 | -0.6877  | 0.271079 | -2.53691 | 0.012745 | 0.060385 | 1 |
| ENSG0000 | mucosal h | Inflamed | IMPDH1P1  | pseudoger  | chr2  | 2.02E+08 | 2.02E+08 | - | 1542  | 11.68258 | 0.264916 | 0.772781 | 0.304651 | 2.536614 | 0.012755 | 0.060414 | 1 |
| ENSG0000 | mucosal h | Inflamed | RP1-161P5 | sense_intr | chr17 | 34084218 | 34085344 | - | 480   | 6.267303 | 0.190931 | 0.595739 | 0.234859 | 2.53658  | 0.012757 | 0.060414 | 1 |
| ENSG0000 | mucosal h | Inflamed | LTBP2     | protein_cc | chr14 | 74964873 | 75079306 | - | 9310  | 2225.384 | 0        | -0.8115  | 0.31994  | -2.53643 | 0.012762 | 0.060414 | 1 |
| ENSG0000 | mucosal h | Inflamed | AP001471  | antisense  | chr21 | 47513178 | 47517444 | - | 672   | 3.825776 | 0.291169 | -0.49349 | 0.194564 | -2.53641 | 0.012762 | 0.060414 | 1 |
| ENSG0000 | mucosal h | Inflamed | C7orf31   | protein_cc | chr7  | 25174316 | 25219975 | - | 3837  | 397.0072 | 0        | 0.374154 | 0.147514 | 2.536393 | 0.012763 | 0.060414 | 1 |
| ENSG0000 | mucosal h | Inflamed | ENTPD8    | protein_cc | chr9  | 1.4E+08  | 1.4E+08  | - | 2836  | 3463.232 | 0        | 0.879282 | 0.346681 | 2.536288 | 0.012767 | 0.06042  | 1 |
| ENSG0000 | mucosal h | Inflamed | RP11-6311 | pseudoger  | chr5  | 60670939 | 60671682 | + | 744   | 2.649165 | 0.403341 | 0.426093 | 0.168003 | 2.536221 | 0.012769 | 0.06042  | 1 |
| ENSG0000 | mucosal h | Inflamed | GIMAP1    | protein_cc | chr7  | 1.5E+08  | 1.5E+08  | + | 4846  | 548.389  | 0        | -0.41339 | 0.163009 | -2.53603 | 0.012776 | 0.060434 | 1 |
| ENSG0000 | mucosal h | Inflamed | NCK2      | protein_cc | chr2  | 1.06E+08 | 1.07E+08 | + | 2990  | 2170.399 | 0        | 0.247944 | 0.09777  | 2.536    | 0.012776 | 0.060434 | 1 |
| ENSG0000 | mucosal h | Inflamed | TSTD1     | protein_cc | chr1  | 1.61E+08 | 1.61E+08 | - | 1210  | 958.1504 | 0        | 0.368844 | 0.14545  | 2.53588  | 0.012781 | 0.060443 | 1 |
| ENSG0000 | mucosal h | Inflamed | RNF5      | protein_cc | chr6  | 32146131 | 32151930 | + | 2043  | 1492.2   | 0        | 0.244631 | 0.096474 | 2.535727 | 0.012786 | 0.060452 | 1 |
| ENSG0000 | mucosal h | Inflamed | AP000476  | lincRNA    | chr21 | 25801054 | 25920256 | + | 4970  | 3.188544 | 0.410501 | -0.54936 | 0.21665  | -2.53569 | 0.012787 | 0.060452 | 1 |
| ENSG0000 | mucosal h | Inflamed | AC092162  | lincRNA    | chr2  | 1.78E+08 | 1.78E+08 | - | 5290  | 1.23389  | 0.701671 | -0.4041  | 0.15938  | -2.53545 | 0.012795 | 0.06048  | 1 |
| ENSG0000 | mucosal h | Inflamed | MPP4      | protein_cc | chr2  | 2.03E+08 | 2.03E+08 | - | 4978  | 1.656325 | 0.668258 | -0.46804 | 0.184626 | -2.53508 | 0.012808 | 0.060529 | 1 |
| ENSG0000 | mucosal h | Inflamed | MORN1     | protein_cc | chr1  | 2252692  | 2323146  | - | 8403  | 201.1671 | 0        | 0.31173  | 0.122978 | 2.534848 | 0.012816 | 0.060556 | 1 |
| ENSG0000 | mucosal h | Inflamed | FAM172Bf  | pseudoger  | chr3  | 1.01E+08 | 1.01E+08 | + | 2295  | 4.431981 | 0.279236 | -0.48497 | 0.191344 | -2.53455 | 0.012826 | 0.060592 | 1 |
| ENSG0000 | mucosal h | Inflamed | RP11-1641 | antisense  | chr14 | 96178084 | 96223993 | + | 3017  | 12.2864  | 0.470167 | -0.85315 | 0.33664  | -2.5343  | 0.012835 | 0.060623 | 1 |
| ENSG0000 | mucosal h | Inflamed | SLC44A3   | protein_cc | chr1  | 95285898 | 95360802 | + | 2869  | 1631.764 | 0        | 0.460867 | 0.181908 | 2.533519 | 0.012862 | 0.060739 | 1 |
| ENSG0000 | mucosal h | Inflamed | TATDN1    | protein_cc | chr8  | 1.26E+08 | 1.26E+08 | - | 4778  | 285.0358 | 0        | 0.319214 | 0.126006 | 2.533321 | 0.012868 | 0.060759 | 1 |
| ENSG0000 | mucosal h | Inflamed | AL163953  | lincRNA    | chr14 | 54066550 | 54080744 | - | 726   | 4.310263 | 0.367542 | 0.60269  | 0.237911 | 2.533261 | 0.01287  | 0.060759 | 1 |
| ENSG0000 | mucosal h | Inflamed | AC004988  | antisense  | chr7  | 40577726 | 40586527 | - | 1771  | 1.890215 | 0.632458 | -0.52651 | 0.207859 | -2.533   | 0.012879 | 0.060763 | 1 |
| ENSG0000 | mucosal h | Inflamed | PPAPDC1B  | protein_cc | chr8  | 38120648 | 38126761 | - | 4414  | 2091.864 | 0        | -0.33932 | 0.13396  | -2.533   | 0.01288  | 0.060763 | 1 |
| ENSG0000 | mucosal h | Inflamed | NPTN      | protein_cc | chr15 | 73852355 | 73926475 | - | 4042  | 4664.766 | 0        | 0.300123 | 0.118488 | 2.532946 | 0.012881 | 0.060763 | 1 |
| ENSG0000 | mucosal h | Inflamed | MYBPC3    | protein_cc | chr11 | 47352957 | 47374253 | - | 4268  | 24.85442 | 0.047733 | -0.74998 | 0.296089 | -2.53294 | 0.012882 | 0.060763 | 1 |
| ENSG0000 | mucosal h | Inflamed | TECTA     | protein_cc | chr11 | 1.21E+08 | 1.21E+08 | + | 7696  | 43.47017 | 0.019093 | -0.60564 | 0.239117 | -2.53281 | 0.012886 | 0.060763 | 1 |
| ENSG0000 | mucosal h | Inflamed | FAM150B   | protein_cc | chr2  | 279558   | 288851   | - | 2191  | 154.4797 | 0        | 0.541215 | 0.213685 | 2.532769 | 0.012887 | 0.060763 | 1 |
| ENSG0000 | mucosal h | Inflamed | RP11-1166 | pseudoger  | chr16 | 31987124 | 32015049 | + | 2227  | 8.472554 | 0.133652 | -0.55884 | 0.220654 | -2.53266 | 0.012891 | 0.060763 | 1 |
| ENSG0000 | mucosal h | Inflamed | KRT5      | protein_cc | chr12 | 52908359 | 52914471 | - | 4292  | 344.0644 | 0.116945 | -1.04445 | 0.412399 | -2.53262 | 0.012893 | 0.060763 | 1 |
| ENSG0000 | mucosal h | Inflamed | CASP5     | protein_cc | chr11 | 1.05E+08 | 1.05E+08 | - | 1592  | 982.2745 | 0        | -0.88559 | 0.349684 | -2.53253 | 0.012896 | 0.060763 | 1 |
| ENSG0000 | mucosal h | Inflamed | NOVA1     | protein_cc | chr14 | 26912299 | 27066960 | - | 10046 | 127.0286 | 0.002387 | 0.558625 | 0.22058  | 2.532523 | 0.012896 | 0.060763 | 1 |
| ENSG0000 | mucosal h | Inflamed | RP5-11571 | antisense  | chr3  | 52273274 | 52275113 | + | 1101  | 8.093079 | 0.090692 | -0.50866 | 0.200851 | -2.5325  | 0.012897 | 0.060763 | 1 |

|          |           |          |           |                  |          |          |   |       |          |          |          |          |          |          |          |   |
|----------|-----------|----------|-----------|------------------|----------|----------|---|-------|----------|----------|----------|----------|----------|----------|----------|---|
| ENSG0000 | mucosal h | Inflamed | DDX26B    | protein_cc chrX  | 1.35E+08 | 1.35E+08 | + | 7177  | 857.7232 | 0        | 0.746989 | 0.295001 | 2.532156 | 0.012909 | 0.060807 | 1 |
| ENSG0000 | mucosal h | Inflamed | LRRC14B   | protein_cc chr5  | 191626   | 195468   | + | 1573  | 5.673031 | 0.186158 | -0.59908 | 0.2366   | -2.53202 | 0.012913 | 0.060818 | 1 |
| ENSG0000 | mucosal h | Inflamed | CALM1     | protein_cc chr14 | 90862846 | 90874605 | + | 7705  | 15155.61 | 0        | 0.281719 | 0.111273 | 2.531787 | 0.012921 | 0.060846 | 1 |
| ENSG0000 | mucosal h | Inflamed | RP11-18H1 | lincRNA chr4     | 1.53E+08 | 1.53E+08 | - | 787   | 1.756563 | 0.572792 | -0.4083  | 0.161285 | -2.53155 | 0.01293  | 0.060874 | 1 |
| ENSG0000 | mucosal h | Inflamed | KIAA1644  | protein_cc chr22 | 44639547 | 44708731 | - | 6751  | 552.9809 | 0        | -0.55735 | 0.220182 | -2.5313  | 0.012938 | 0.060902 | 1 |
| ENSG0000 | mucosal h | Inflamed | CTD-2547L | protein_cc chr14 | 91709103 | 91717426 | + | 787   | 20.42005 | 0.016706 | -0.48842 | 0.192963 | -2.53117 | 0.012943 | 0.060905 | 1 |
| ENSG0000 | mucosal h | Inflamed | TFE3      | protein_cc chrX  | 48886242 | 48901012 | - | 4278  | 3137.461 | 0        | -0.28036 | 0.110765 | -2.53115 | 0.012943 | 0.060905 | 1 |
| ENSG0000 | mucosal h | Inflamed | ZNF703    | protein_cc chr8  | 37553269 | 37557537 | + | 3347  | 4303.289 | 0        | 0.425059 | 0.167946 | 2.530922 | 0.012951 | 0.060932 | 1 |
| ENSG0000 | mucosal h | Inflamed | TET3      | protein_cc chr2  | 74229840 | 74335303 | + | 11439 | 2474.516 | 0        | 0.466852 | 0.184467 | 2.530809 | 0.012955 | 0.060939 | 1 |
| ENSG0000 | mucosal h | Inflamed | Y_RNA     | misc_RNA chrX    | 1.19E+08 | 1.19E+08 | + | 101   | 1.136038 | 0.675418 | 0.335132 | 0.132435 | 2.530541 | 0.012964 | 0.060972 | 1 |
| ENSG0000 | mucosal h | Inflamed | RP11-1149 | lincRNA chr8     | 82066514 | 82076834 | + | 1136  | 8.164678 | 0.066826 | -0.5364  | 0.211984 | -2.53037 | 0.01297  | 0.06099  | 1 |
| ENSG0000 | mucosal h | Inflamed | TSGA10    | protein_cc chr2  | 99613724 | 99771427 | - | 7375  | 88.18377 | 0        | 0.515186 | 0.203653 | 2.529727 | 0.012993 | 0.061051 | 1 |
| ENSG0000 | mucosal h | Inflamed | PLEKHD1   | protein_cc chr14 | 69951409 | 69995215 | + | 5044  | 3.140811 | 0.369928 | -0.483   | 0.190931 | -2.52972 | 0.012993 | 0.061051 | 1 |
| ENSG0000 | mucosal h | Inflamed | STIM1     | protein_cc chr11 | 3875757  | 4114439  | + | 6811  | 4110.816 | 0        | 0.33918  | 0.134078 | 2.529713 | 0.012993 | 0.061051 | 1 |
| ENSG0000 | mucosal h | Inflamed | RER1      | protein_cc chr1  | 2323267  | 2336883  | + | 5638  | 6658.883 | 0        | 0.127566 | 0.050427 | 2.529709 | 0.012993 | 0.061051 | 1 |
| ENSG0000 | mucosal h | Inflamed | LINC00507 | lincRNA chr12    | 1.28E+08 | 1.28E+08 | + | 2167  | 4.840095 | 0.52506  | 0.548538 | 0.216843 | 2.529657 | 0.012995 | 0.061051 | 1 |
| ENSG0000 | mucosal h | Inflamed | RP11-426L | antisense chr1   | 1.13E+08 | 1.13E+08 | - | 449   | 1.243437 | 0.718377 | 0.336197 | 0.132925 | 2.529219 | 0.01301  | 0.061112 | 1 |
| ENSG0000 | mucosal h | Inflamed | RN7SL721L | misc_RNA chr1    | 10450059 | 10450353 | + | 295   | 2.704057 | 0.365155 | 0.377252 | 0.149165 | 2.529092 | 0.013015 | 0.061121 | 1 |
| ENSG0000 | mucosal h | Inflamed | COX20     | protein_cc chr1  | 2.45E+08 | 2.45E+08 | + | 4864  | 794.1981 | 0        | 0.359255 | 0.142059 | 2.528921 | 0.013021 | 0.061133 | 1 |
| ENSG0000 | mucosal h | Inflamed | RP11-834C | lincRNA chr12    | 54555849 | 54558236 | - | 754   | 2.484487 | 0.47494  | 0.443287 | 0.17529  | 2.528886 | 0.013022 | 0.061133 | 1 |
| ENSG0000 | mucosal h | Inflamed | FCER2     | protein_cc chr19 | 7753644  | 7767032  | - | 2367  | 279.21   | 0        | -0.85788 | 0.33925  | -2.52876 | 0.013026 | 0.06114  | 1 |
| ENSG0000 | mucosal h | Inflamed | SKOR1     | protein_cc chr15 | 68112042 | 68126899 | + | 4479  | 14.99284 | 0.0358   | 0.448666 | 0.177429 | 2.528713 | 0.013028 | 0.06114  | 1 |
| ENSG0000 | mucosal h | Inflamed | CELA3B    | protein_cc chr1  | 22303514 | 22325135 | + | 1541  | 13.51313 | 0.341289 | 0.671092 | 0.265426 | 2.528358 | 0.01304  | 0.061185 | 1 |
| ENSG0000 | mucosal h | Inflamed | DNER      | protein_cc chr2  | 2.3E+08  | 2.31E+08 | - | 3935  | 24.6611  | 0.059666 | -0.75625 | 0.299114 | -2.5283  | 0.013042 | 0.061185 | 1 |
| ENSG0000 | mucosal h | Inflamed | SLC9A1    | protein_cc chr1  | 27425306 | 27493472 | - | 5974  | 7353.974 | 0        | 0.389285 | 0.153989 | 2.527999 | 0.013053 | 0.061215 | 1 |
| ENSG0000 | mucosal h | Inflamed | RP11-109I | lincRNA chr9     | 72287665 | 72288629 | + | 965   | 1.513126 | 0.618138 | 0.394981 | 0.156244 | 2.527985 | 0.013053 | 0.061215 | 1 |
| ENSG0000 | mucosal h | Inflamed | RP11-178C | lincRNA chr10    | 75880013 | 75880621 | - | 609   | 35.13604 | 0        | 0.395872 | 0.156639 | 2.527292 | 0.013077 | 0.061317 | 1 |
| ENSG0000 | mucosal h | Inflamed | RP11-731I | lincRNA chr4     | 1.52E+08 | 1.52E+08 | - | 540   | 10.88067 | 0.124105 | 0.557058 | 0.220463 | 2.526769 | 0.013096 | 0.061392 | 1 |
| ENSG0000 | mucosal h | Inflamed | VT11B     | protein_cc chr14 | 68113792 | 68141548 | - | 5789  | 2537.508 | 0        | 0.283163 | 0.112071 | 2.526648 | 0.0131   | 0.061401 | 1 |
| ENSG0000 | mucosal h | Inflamed | NAGS      | protein_cc chr17 | 42081914 | 42086431 | + | 2822  | 246.5967 | 0        | 0.488888 | 0.193513 | 2.526389 | 0.013109 | 0.061433 | 1 |
| ENSG0000 | mucosal h | Inflamed | SPA17P1   | pseudoger chr10  | 77142151 | 77142602 | - | 452   | 0.813842 | 0.799523 | 0.215972 | 0.085492 | 2.526207 | 0.013115 | 0.061441 | 1 |
| ENSG0000 | mucosal h | Inflamed | CCL3L1    | protein_cc chr17 | 34623842 | 34625731 | - | 1469  | 25.21002 | 0.229117 | -1.0384  | 0.411053 | -2.5262  | 0.013116 | 0.061441 | 1 |
| ENSG0000 | mucosal h | Inflamed | SBDS      | protein_cc chr7  | 66452664 | 66460588 | - | 1732  | 3000.136 | 0        | 0.328278 | 0.129953 | 2.526128 | 0.013118 | 0.061443 | 1 |
| ENSG0000 | mucosal h | Inflamed | RXRG      | protein_cc chr1  | 1.65E+08 | 1.65E+08 | - | 2532  | 49.31981 | 0.004773 | 0.731874 | 0.289738 | 2.525986 | 0.013123 | 0.061453 | 1 |
| ENSG0000 | mucosal h | Inflamed | MPC2      | protein_cc chr1  | 1.68E+08 | 1.68E+08 | - | 2552  | 2377.282 | 0        | 0.316208 | 0.125185 | 2.525929 | 0.013125 | 0.061453 | 1 |
| ENSG0000 | mucosal h | Inflamed | RP11-407I | protein_cc chr14 | 39703106 | 39820397 | + | 5392  | 0.799523 | 0.782816 | -0.32518 | 0.128785 | -2.52501 | 0.013157 | 0.061594 | 1 |
| ENSG0000 | mucosal h | Inflamed | RNF32     | protein_cc chr7  | 1.56E+08 | 1.56E+08 | + | 4371  | 40.65871 | 0        | 0.390833 | 0.154792 | 2.524898 | 0.013161 | 0.061601 | 1 |
| ENSG0000 | mucosal h | Inflamed | CNPPD1    | protein_cc chr2  | 2.2E+08  | 2.2E+08  | - | 2760  | 4871.174 | 0        | 0.263931 | 0.104543 | 2.524615 | 0.013171 | 0.061636 | 1 |
| ENSG0000 | mucosal h | Inflamed | COL6A6    | protein_cc chr3  | 1.3E+08  | 1.3E+08  | + | 9733  | 19.13604 | 0.396181 | -1.12894 | 0.447188 | -2.52453 | 0.013174 | 0.061639 | 1 |
| ENSG0000 | mucosal h | Inflamed | RP11-661I | lincRNA chr8     | 1.45E+08 | 1.45E+08 | + | 1979  | 118.043  | 0        | 0.314626 | 0.12465  | 2.524064 | 0.013191 | 0.061687 | 1 |



|          |           |          |           |            |       |          |          |   |       |          |          |          |          |          |          |          |   |
|----------|-----------|----------|-----------|------------|-------|----------|----------|---|-------|----------|----------|----------|----------|----------|----------|----------|---|
| ENSG0000 | mucosal h | Inflamed | PDPK1     | protein_cc | chr16 | 2587965  | 2653189  | + | 10933 | 3953.138 | 0        | 0.365169 | 0.144678 | 2.524014 | 0.013192 | 0.061687 | 1 |
| ENSG0000 | mucosal h | Inflamed | RP1-228P1 | protein_cc | chr12 | 48413554 | 48419165 | - | 962   | 0.854415 | 0.787589 | 0.258526 | 0.102428 | 2.523981 | 0.013194 | 0.061687 | 1 |
| ENSG0000 | mucosal h | Inflamed | ANKMY2    | protein_cc | chr7  | 16639401 | 16685442 | - | 2854  | 561.2983 | 0        | 0.439768 | 0.174236 | 2.523975 | 0.013194 | 0.061687 | 1 |
| ENSG0000 | mucosal h | Inflamed | NANS      | protein_cc | chr9  | 1.01E+08 | 1.01E+08 | + | 4922  | 4206.236 | 0        | 0.323237 | 0.128076 | 2.52379  | 0.0132   | 0.061706 | 1 |
| ENSG0000 | mucosal h | Inflamed | KREMEN1   | protein_cc | chr22 | 29469066 | 29564321 | + | 7977  | 4538.862 | 0        | 0.366154 | 0.14511  | 2.523285 | 0.013218 | 0.061779 | 1 |
| ENSG0000 | mucosal h | Inflamed | WASH2P    | pseudoger  | chr2  | 1.14E+08 | 1.14E+08 | + | 3043  | 516.5203 | 0        | 0.273769 | 0.108504 | 2.523117 | 0.013224 | 0.061795 | 1 |
| ENSG0000 | mucosal h | Inflamed | CRYM-AS1  | lincRNA    | chr16 | 21312170 | 21329912 | + | 2515  | 13.36754 | 0.062053 | 0.556876 | 0.220728 | 2.522904 | 0.013232 | 0.061816 | 1 |
| ENSG0000 | mucosal h | Inflamed | UTS2B     | protein_cc | chr3  | 1.91E+08 | 1.91E+08 | - | 3850  | 13.46301 | 0.064439 | -0.57405 | 0.227539 | -2.52286 | 0.013233 | 0.061816 | 1 |
| ENSG0000 | mucosal h | Inflamed | SARM1     | protein_cc | chr17 | 26691378 | 26728065 | + | 8132  | 1167.232 | 0        | 0.259871 | 0.103014 | 2.522675 | 0.01324  | 0.061835 | 1 |
| ENSG0000 | mucosal h | Inflamed | RP5-1073C | antisense  | chr1  | 1.14E+08 | 1.14E+08 | - | 3087  | 6.527446 | 0.088305 | 0.433176 | 0.171728 | 2.522455 | 0.013247 | 0.06186  | 1 |
| ENSG0000 | mucosal h | Inflamed | PGRMC2    | protein_cc | chr4  | 1.29E+08 | 1.29E+08 | - | 4621  | 2809.888 | 0        | 0.25992  | 0.103054 | 2.52217  | 0.013258 | 0.061871 | 1 |
| ENSG0000 | mucosal h | Inflamed | C6orf163  | protein_cc | chr6  | 88054567 | 88075181 | + | 2884  | 21.37232 | 0.042959 | 0.643336 | 0.255073 | 2.522167 | 0.013258 | 0.061871 | 1 |
| ENSG0000 | mucosal h | Inflamed | RP11-1141 | pseudoger  | chr12 | 76082574 | 76082876 | - | 303   | 1.415274 | 0.622912 | -0.36126 | 0.143236 | -2.52216 | 0.013258 | 0.061871 | 1 |
| ENSG0000 | mucosal h | Inflamed | CNRIP1    | protein_cc | chr2  | 68511303 | 68547183 | - | 3548  | 375.401  | 0        | -0.43398 | 0.172068 | -2.52213 | 0.013259 | 0.061871 | 1 |
| ENSG0000 | mucosal h | Inflamed | AC002511  | lincRNA    | chr19 | 35890413 | 35910287 | + | 4107  | 1.171838 | 0.711217 | -0.31498 | 0.124893 | -2.52199 | 0.013264 | 0.061882 | 1 |
| ENSG0000 | mucosal h | Inflamed | CTD-20211 | protein_cc | chr12 | 71441182 | 71512027 | - | 565   | 15.76134 | 0.078759 | 0.716276 | 0.284023 | 2.521898 | 0.013267 | 0.061887 | 1 |
| ENSG0000 | mucosal h | Inflamed | NUDT1     | protein_cc | chr7  | 2281857  | 2290781  | + | 2006  | 282.6706 | 0        | -0.32693 | 0.129663 | -2.52141 | 0.013284 | 0.061956 | 1 |
| ENSG0000 | mucosal h | Inflamed | MIR940    | lincRNA    | chr16 | 2318156  | 2323419  | + | 980   | 47.58711 | 0        | 0.353778 | 0.140328 | 2.521074 | 0.013296 | 0.061998 | 1 |
| ENSG0000 | mucosal h | Inflamed | DAGLB     | protein_cc | chr7  | 6448757  | 6523821  | - | 5756  | 884.074  | 0        | 0.228963 | 0.090821 | 2.521026 | 0.013298 | 0.061998 | 1 |
| ENSG0000 | mucosal h | Inflamed | GALNT8    | protein_cc | chr12 | 4829507  | 4960277  | + | 3231  | 580.1146 | 0.002387 | 0.912647 | 0.362036 | 2.520876 | 0.013303 | 0.062011 | 1 |
| ENSG0000 | mucosal h | Inflamed | RNF133    | protein_cc | chr7  | 1.22E+08 | 1.22E+08 | - | 1445  | 1.804296 | 0.5179   | 0.358268 | 0.142155 | 2.520262 | 0.013325 | 0.062102 | 1 |
| ENSG0000 | mucosal h | Inflamed | S100A7    | protein_cc | chr1  | 1.53E+08 | 1.53E+08 | - | 536   | 52.6611  | 0.551313 | -1.45579 | 0.57776  | -2.51971 | 0.013345 | 0.062166 | 1 |
| ENSG0000 | mucosal h | Inflamed | SERPINB5  | protein_cc | chr18 | 61143994 | 61172318 | + | 3939  | 1892.69  | 0        | -1.01852 | 0.404233 | -2.51964 | 0.013347 | 0.062166 | 1 |
| ENSG0000 | mucosal h | Inflamed | RP11-3361 | lincRNA    | chr10 | 5658825  | 5660124  | - | 657   | 0.97136  | 0.782816 | 0.324323 | 0.128723 | 2.519542 | 0.013351 | 0.062166 | 1 |
| ENSG0000 | mucosal h | Inflamed | GSG1L     | protein_cc | chr16 | 27798850 | 28074830 | - | 5219  | 9.202864 | 0.317422 | 0.610785 | 0.24242  | 2.51953  | 0.013351 | 0.062166 | 1 |
| ENSG0000 | mucosal h | Inflamed | MRPL46    | protein_cc | chr15 | 89002707 | 89010650 | - | 6432  | 264.0239 | 0        | 0.269577 | 0.106996 | 2.519511 | 0.013352 | 0.062166 | 1 |
| ENSG0000 | mucosal h | Inflamed | IFNE      | protein_cc | chr9  | 21480841 | 21482312 | - | 1472  | 3.921241 | 0.568019 | -0.65494 | 0.259951 | -2.51948 | 0.013353 | 0.062166 | 1 |
| ENSG0000 | mucosal h | Inflamed | RP11-1109 | lincRNA    | chr12 | 89765597 | 89766136 | + | 540   | 3.656325 | 0.281623 | 0.456659 | 0.181305 | 2.518728 | 0.01338  | 0.062279 | 1 |
| ENSG0000 | mucosal h | Inflamed | ADAMTS7   | protein_cc | chr15 | 79051545 | 79103773 | - | 7730  | 647.8091 | 0        | -0.54826 | 0.217681 | -2.51863 | 0.013383 | 0.062284 | 1 |
| ENSG0000 | mucosal h | Inflamed | NDST4     | protein_cc | chr4  | 1.16E+08 | 1.16E+08 | - | 3719  | 1.797136 | 0.646778 | 0.492228 | 0.195454 | 2.518388 | 0.013392 | 0.062307 | 1 |
| ENSG0000 | mucosal h | Inflamed | RP11-31F1 | sense_intr | chr9  | 547317   | 549531   | + | 450   | 13.91647 | 0        | -0.33747 | 0.134005 | -2.51836 | 0.013393 | 0.062307 | 1 |
| ENSG0000 | mucosal h | Inflamed | FMN1      | protein_cc | chr15 | 33057747 | 33486897 | - | 20046 | 1263.453 | 0        | 0.535023 | 0.212484 | 2.51795  | 0.013407 | 0.062364 | 1 |
| ENSG0000 | mucosal h | Inflamed | AP1M1     | protein_cc | chr19 | 16308389 | 16346160 | + | 3813  | 1584.492 | 0        | -0.30982 | 0.123075 | -2.51734 | 0.013429 | 0.062454 | 1 |
| ENSG0000 | mucosal h | Inflamed | MORF4L2-  | antisense  | chrX  | 1.03E+08 | 1.03E+08 | + | 2086  | 28.26253 | 0.050119 | 0.665161 | 0.264255 | 2.517112 | 0.013437 | 0.062481 | 1 |
| ENSG0000 | mucosal h | Inflamed | FAM213A   | protein_cc | chr10 | 82167585 | 82192753 | + | 2337  | 1430.508 | 0        | 0.378157 | 0.150238 | 2.517047 | 0.01344  | 0.062481 | 1 |
| ENSG0000 | mucosal h | Inflamed | RP11-285J | antisense  | chr3  | 37223598 | 37224225 | + | 628   | 9.694511 | 0.133652 | 0.611442 | 0.242992 | 2.516306 | 0.013466 | 0.062594 | 1 |
| ENSG0000 | mucosal h | Inflamed | RP11-44F1 | lincRNA    | chr16 | 53420856 | 53422997 | + | 2142  | 50.00955 | 0.016706 | 0.642835 | 0.255492 | 2.516062 | 0.013475 | 0.062623 | 1 |
| ENSG0000 | mucosal h | Inflamed | SNORD591  | snoRNA     | chr12 | 57038811 | 57038885 | - | 75    | 11.51074 | 0.095465 | 0.51147  | 0.203351 | 2.515214 | 0.013506 | 0.062743 | 1 |
| ENSG0000 | mucosal h | Inflamed | C1RL      | protein_cc | chr12 | 7242183  | 7261869  | - | 5014  | 2022.492 | 0        | -0.30707 | 0.122087 | -2.51521 | 0.013506 | 0.062743 | 1 |
| ENSG0000 | mucosal h | Inflamed | RNF135    | protein_cc | chr17 | 29295803 | 29326929 | + | 3580  | 919.0024 | 0        | 0.152257 | 0.060545 | 2.514759 | 0.013522 | 0.062808 | 1 |

|          |           |          |                          |            |          |          |          |      |          |          |          |          |          |          |          |          |   |
|----------|-----------|----------|--------------------------|------------|----------|----------|----------|------|----------|----------|----------|----------|----------|----------|----------|----------|---|
| ENSG0000 | mucosal h | Inflamed | TMEM72- <i>antisense</i> | chr10      | 45306472 | 45455137 | -        | 3300 | 5.136038 | 0.188544 | 0.440375 | 0.175135 | 2.514492 | 0.013532 | 0.062841 | 1        |   |
| ENSG0000 | mucosal h | Inflamed | GLI4                     | protein_cc | chr8     | 1.44E+08 | 1.44E+08 | +    | 3057     | 532.2291 | 0        | 0.308369 | 0.122648 | 2.514267 | 0.01354  | 0.062868 | 1 |
| ENSG0000 | mucosal h | Inflamed | TREM2                    | protein_cc | chr6     | 41126244 | 41130924 | -    | 1095     | 78.63723 | 0.002387 | -0.62329 | 0.247938 | -2.51388 | 0.013554 | 0.062922 | 1 |
| ENSG0000 | mucosal h | Inflamed | KHDC1                    | protein_cc | chr6     | 73951037 | 74020088 | -    | 3319     | 34.6969  | 0.002387 | -0.3868  | 0.153884 | -2.51357 | 0.013565 | 0.062962 | 1 |
| ENSG0000 | mucosal h | Inflamed | RP3-467N                 | pseudoger  | chr6     | 1.01E+08 | 1.01E+08 | +    | 736      | 3.47494  | 0.190931 | -0.36106 | 0.14366  | -2.5133  | 0.013575 | 0.062996 | 1 |
| ENSG0000 | mucosal h | Inflamed | TOP1MT                   | protein_cc | chr8     | 1.44E+08 | 1.44E+08 | -    | 6441     | 655.9666 | 0        | 0.254046 | 0.101089 | 2.513079 | 0.013583 | 0.063022 | 1 |
| ENSG0000 | mucosal h | Inflamed | GJB1                     | protein_cc | chrX     | 70435044 | 70445366 | +    | 2235     | 1964.148 | 0.004773 | 0.704054 | 0.280172 | 2.512931 | 0.013588 | 0.063033 | 1 |
| ENSG0000 | mucosal h | Inflamed | RP1-167G                 | lincRNA    | chr5     | 16373470 | 16440190 | -    | 2120     | 1.124105 | 0.74463  | 0.360206 | 0.143344 | 2.512885 | 0.01359  | 0.063033 | 1 |
| ENSG0000 | mucosal h | Inflamed | AC068587                 | miRNA      | chr8     | 12435514 | 12435661 | +    | 148      | 5.288783 | 0.279236 | 0.556704 | 0.221551 | 2.512762 | 0.013594 | 0.063042 | 1 |
| ENSG0000 | mucosal h | Inflamed | LA16c-316                | antisense  | chr16    | 1408901  | 1411406  | -    | 435      | 0.902148 | 0.761337 | 0.28154  | 0.112049 | 2.512657 | 0.013598 | 0.063048 | 1 |
| ENSG0000 | mucosal h | Inflamed | RP1-283E3                | processed  | chr1     | 1634175  | 1669127  | -    | 5079     | 246.2864 | 0.01432  | 0.593562 | 0.236261 | 2.512311 | 0.01361  | 0.063095 | 1 |
| ENSG0000 | mucosal h | Inflamed | SERF1B                   | protein_cc | chr5     | 69321074 | 69338940 | +    | 3051     | 9.5179   | 0.038186 | 0.393418 | 0.156614 | 2.512026 | 0.013621 | 0.063132 | 1 |
| ENSG0000 | mucosal h | Inflamed | RP11-3831                | protein_cc | chr8     | 72740402 | 73030628 | +    | 6284     | 115.0859 | 0.002387 | -0.57719 | 0.229788 | -2.51182 | 0.013628 | 0.063155 | 1 |
| ENSG0000 | mucosal h | Inflamed | MAPRE3                   | protein_cc | chr2     | 27193480 | 27250064 | +    | 3459     | 1123.933 | 0        | 0.389654 | 0.155137 | 2.511681 | 0.013633 | 0.063168 | 1 |
| ENSG0000 | mucosal h | Inflamed | ABHD14B                  | protein_cc | chr3     | 52002526 | 52017425 | -    | 3161     | 3308.387 | 0        | 0.259622 | 0.103378 | 2.511379 | 0.013644 | 0.063208 | 1 |
| ENSG0000 | mucosal h | Inflamed | RP11-863F                | lincRNA    | chr16    | 88121647 | 88134591 | -    | 3616     | 5.75179  | 0.26253  | 0.578832 | 0.230503 | 2.511173 | 0.013652 | 0.063231 | 1 |
| ENSG0000 | mucosal h | Inflamed | NCR1                     | protein_cc | chr19    | 55417508 | 55427508 | +    | 1893     | 13.78282 | 0.045346 | -0.48892 | 0.194718 | -2.51093 | 0.013661 | 0.063261 | 1 |
| ENSG0000 | mucosal h | Inflamed | TBC1D22B                 | protein_cc | chr6     | 37225548 | 37300746 | +    | 3462     | 926.5298 | 0        | 0.235225 | 0.093695 | 2.510539 | 0.013675 | 0.063313 | 1 |
| ENSG0000 | mucosal h | Inflamed | TRADD                    | protein_cc | chr16    | 67188083 | 67194201 | -    | 2567     | 1160.305 | 0        | -0.22856 | 0.091041 | -2.51049 | 0.013676 | 0.063313 | 1 |
| ENSG0000 | mucosal h | Inflamed | PAWR                     | protein_cc | chr12    | 79968759 | 80084877 | -    | 11668    | 1788.47  | 0        | 0.549212 | 0.21878  | 2.510339 | 0.013682 | 0.063327 | 1 |
| ENSG0000 | mucosal h | Inflamed | AC009120                 | antisense  | chr16    | 74339100 | 74369244 | -    | 1357     | 98.54415 | 0.002387 | 0.60748  | 0.242017 | 2.51007  | 0.013692 | 0.063361 | 1 |
| ENSG0000 | mucosal h | Inflamed | EEF1DP1                  | pseudoger  | chr19    | 14181154 | 14182052 | +    | 899      | 13.83294 | 0.011933 | -0.42521 | 0.169436 | -2.50955 | 0.013711 | 0.063438 | 1 |
| ENSG0000 | mucosal h | Inflamed | RP11-493L                | pseudoger  | chr12    | 47735397 | 47735872 | -    | 476      | 0.983294 | 0.763723 | -0.34886 | 0.139019 | -2.50941 | 0.013716 | 0.06344  | 1 |
| ENSG0000 | mucosal h | Inflamed | SPINT1                   | protein_cc | chr15    | 41136216 | 41150405 | +    | 3587     | 13434.04 | 0        | 0.443667 | 0.176805 | 2.509358 | 0.013718 | 0.06344  | 1 |
| ENSG0000 | mucosal h | Inflamed | RP11-265F                | lincRNA    | chrX     | 39164210 | 39186616 | -    | 1773     | 6.48926  | 0.360382 | -0.61639 | 0.24564  | -2.50934 | 0.013718 | 0.06344  | 1 |
| ENSG0000 | mucosal h | Inflamed | LAMA1                    | protein_cc | chr18    | 6941743  | 7117813  | -    | 15872    | 351.0072 | 0        | 0.516124 | 0.205718 | 2.50889  | 0.013735 | 0.06349  | 1 |
| ENSG0000 | mucosal h | Inflamed | TSPAN12                  | protein_cc | chr7     | 1.2E+08  | 1.2E+08  | -    | 3366     | 708.7279 | 0        | 0.424093 | 0.169037 | 2.508875 | 0.013735 | 0.06349  | 1 |
| ENSG0000 | mucosal h | Inflamed | NP1PB11                  | protein_cc | chr16    | 29392675 | 29415350 | -    | 3653     | 71.28878 | 0.004773 | 0.543568 | 0.216661 | 2.508839 | 0.013737 | 0.06349  | 1 |
| ENSG0000 | mucosal h | Inflamed | ANO9                     | protein_cc | chr11    | 417933   | 442011   | -    | 6207     | 3961.702 | 0        | 0.487915 | 0.194517 | 2.508347 | 0.013754 | 0.063561 | 1 |
| ENSG0000 | mucosal h | Inflamed | ESRP2                    | protein_cc | chr16    | 68263014 | 68272005 | -    | 5563     | 3787.962 | 0        | 0.631657 | 0.251828 | 2.508286 | 0.013757 | 0.063561 | 1 |
| ENSG0000 | mucosal h | Inflamed | AL590762                 | pseudoger  | chrX     | 70572268 | 70572838 | +    | 571      | 1.785203 | 0.551313 | 0.370587 | 0.147755 | 2.508121 | 0.013763 | 0.063567 | 1 |
| ENSG0000 | mucosal h | Inflamed | CLDND2                   | protein_cc | chr19    | 51870352 | 51872257 | -    | 1156     | 34.17184 | 0        | 0.360557 | 0.143758 | 2.508088 | 0.013764 | 0.063567 | 1 |
| ENSG0000 | mucosal h | Inflamed | RNU1-72P                 | snRNA      | chr7     | 1.29E+08 | 1.29E+08 | +    | 153      | 1.885442 | 0.596659 | -0.46636 | 0.185947 | -2.50805 | 0.013765 | 0.063567 | 1 |
| ENSG0000 | mucosal h | Inflamed | ATO7                     | protein_cc | chr10    | 69990386 | 69991871 | -    | 1486     | 3.873508 | 0.398568 | 0.395893 | 0.157869 | 2.507724 | 0.013777 | 0.063612 | 1 |
| ENSG0000 | mucosal h | Inflamed | TRAPPC2P                 | protein_cc | chr19    | 57874879 | 57876721 | +    | 1843     | 65.15274 | 0        | -0.35292 | 0.140749 | -2.50742 | 0.013788 | 0.06364  | 1 |
| ENSG0000 | mucosal h | Inflamed | HP                       | protein_cc | chr16    | 72088491 | 72094954 | +    | 5405     | 12.72076 | 0.200477 | -0.79381 | 0.316583 | -2.50742 | 0.013788 | 0.06364  | 1 |
| ENSG0000 | mucosal h | Inflamed | ARL14                    | protein_cc | chr3     | 1.6E+08  | 1.6E+08  | +    | 1286     | 938.9141 | 0.002387 | 0.783885 | 0.312635 | 2.507351 | 0.013791 | 0.063641 | 1 |
| ENSG0000 | mucosal h | Inflamed | RP11-468E                | pseudoger  | chr14    | 24505662 | 24520580 | +    | 1717     | 12.36754 | 0.059666 | 0.491927 | 0.196224 | 2.506963 | 0.013805 | 0.063695 | 1 |
| ENSG0000 | mucosal h | Inflamed | IGFBPL1                  | protein_cc | chr9     | 38408991 | 38424444 | -    | 1093     | 11.7852  | 0.042959 | -0.48546 | 0.193648 | -2.5069  | 0.013807 | 0.063695 | 1 |
| ENSG0000 | mucosal h | Inflamed | GUSBP9                   | pseudoger  | chr5     | 70435716 | 70585611 | -    | 1645     | 24.96659 | 0.038186 | 0.581484 | 0.231965 | 2.506773 | 0.013812 | 0.063705 | 1 |

|          |           |          |           |                  |          |          |   |       |          |          |          |          |          |          |          |   |
|----------|-----------|----------|-----------|------------------|----------|----------|---|-------|----------|----------|----------|----------|----------|----------|----------|---|
| ENSG0000 | mucosal h | Inflamed | GNAS      | protein_cc chr20 | 57414773 | 57486247 | + | 13320 | 27775.6  | 0        | -0.16959 | 0.067664 | -2.50636 | 0.013827 | 0.063765 | 1 |
| ENSG0000 | mucosal h | Inflamed | SPAG1     | protein_cc chr8  | 1.01E+08 | 1.01E+08 | + | 5054  | 943.6516 | 0        | 0.538727 | 0.214955 | 2.506235 | 0.013832 | 0.063774 | 1 |
| ENSG0000 | mucosal h | Inflamed | RP11-933t | processed_chr3   | 1.31E+08 | 1.31E+08 | - | 4200  | 17.25537 | 0.0358   | 0.618491 | 0.246789 | 2.506157 | 0.013835 | 0.063776 | 1 |
| ENSG0000 | mucosal h | Inflamed | RP11-389C | sense_ove chr5   | 71735730 | 71738214 | - | 2485  | 197.2936 | 0.002387 | -0.52753 | 0.21052  | -2.50587 | 0.013845 | 0.063814 | 1 |
| ENSG0000 | mucosal h | Inflamed | PRODH     | protein_cc chr22 | 18900294 | 18924066 | - | 8772  | 302.1933 | 0.004773 | 0.76714  | 0.30616  | 2.50568  | 0.013852 | 0.063835 | 1 |
| ENSG0000 | mucosal h | Inflamed | LSAMP     | protein_cc chr3  | 1.16E+08 | 1.18E+08 | - | 10367 | 414.5131 | 0.002387 | -0.71264 | 0.284432 | -2.50548 | 0.01386  | 0.063849 | 1 |
| ENSG0000 | mucosal h | Inflamed | OCLN      | protein_cc chr5  | 68788119 | 68853931 | + | 6761  | 884.7876 | 0        | 0.721374 | 0.287925 | 2.505422 | 0.013862 | 0.063849 | 1 |
| ENSG0000 | mucosal h | Inflamed | CPNE9     | protein_cc chr3  | 9745491  | 9771592  | + | 2332  | 4.078759 | 0.171838 | -0.43105 | 0.17205  | -2.5054  | 0.013863 | 0.063849 | 1 |
| ENSG0000 | mucosal h | Inflamed | ESR1      | protein_cc chr6  | 1.52E+08 | 1.52E+08 | + | 13629 | 82.14081 | 0.01432  | -0.74157 | 0.296014 | -2.5052  | 0.01387  | 0.063872 | 1 |
| ENSG0000 | mucosal h | Inflamed | ATF4P4    | pseudoger chr11  | 1.14E+08 | 1.14E+08 | + | 2136  | 5.632458 | 0.105012 | -0.41707 | 0.166502 | -2.50487 | 0.013882 | 0.063912 | 1 |
| ENSG0000 | mucosal h | Inflamed | AP001877  | pseudoger chr11  | 95556681 | 95557336 | - | 654   | 3.811456 | 0.26253  | 0.424661 | 0.16954  | 2.504784 | 0.013885 | 0.063912 | 1 |
| ENSG0000 | mucosal h | Inflamed | ZRANB2-A  | processed_chr1   | 71547007 | 71955652 | + | 5719  | 4.534606 | 0.229117 | 0.461234 | 0.184143 | 2.504759 | 0.013886 | 0.063912 | 1 |
| ENSG0000 | mucosal h | Inflamed | TRIM66    | protein_cc chr11 | 8633584  | 8693413  | - | 10816 | 1195.652 | 0        | 0.529016 | 0.211222 | 2.504551 | 0.013894 | 0.063923 | 1 |
| ENSG0000 | mucosal h | Inflamed | ENO2      | protein_cc chr12 | 7022909  | 7032861  | + | 4281  | 745.2053 | 0        | -0.45626 | 0.182171 | -2.50455 | 0.013894 | 0.063923 | 1 |
| ENSG0000 | mucosal h | Inflamed | MGAT4A    | protein_cc chr2  | 99235569 | 99347589 | - | 9630  | 3094.074 | 0        | 0.56118  | 0.224069 | 2.504496 | 0.013896 | 0.063923 | 1 |
| ENSG0000 | mucosal h | Inflamed | RP3-395M  | lincRNA chr1     | 2477904  | 2478899  | + | 996   | 92.40095 | 0        | 0.305361 | 0.121954 | 2.50391  | 0.013918 | 0.064002 | 1 |
| ENSG0000 | mucosal h | Inflamed | CNOT7P1   | pseudoger chrX   | 69157016 | 69157867 | - | 852   | 1.183771 | 0.696897 | 0.313067 | 0.125032 | 2.5039   | 0.013918 | 0.064002 | 1 |
| ENSG0000 | mucosal h | Inflamed | ALDH1B1   | protein_cc chr9  | 38392661 | 38398658 | + | 3066  | 2591.73  | 0        | 0.34183  | 0.136528 | 2.503738 | 0.013924 | 0.064004 | 1 |
| ENSG0000 | mucosal h | Inflamed | RNU6-678  | snRNA chr3       | 1.33E+08 | 1.33E+08 | + | 100   | 1.281623 | 0.653938 | 0.308959 | 0.1234   | 2.503731 | 0.013924 | 0.064004 | 1 |
| ENSG0000 | mucosal h | Inflamed | MROH6     | protein_cc chr8  | 1.45E+08 | 1.45E+08 | - | 4408  | 1218.63  | 0        | -0.49263 | 0.196761 | -2.50369 | 0.013926 | 0.064004 | 1 |
| ENSG0000 | mucosal h | Inflamed | RP11-449F | antisense chr7   | 1094996  | 1098897  | - | 1562  | 2.508353 | 0.360382 | -0.35747 | 0.142796 | -2.50333 | 0.013939 | 0.064041 | 1 |
| ENSG0000 | mucosal h | Inflamed | SAG       | protein_cc chr2  | 2.34E+08 | 2.34E+08 | + | 11885 | 2.052506 | 0.546539 | 0.329784 | 0.131739 | 2.503324 | 0.013939 | 0.064041 | 1 |
| ENSG0000 | mucosal h | Inflamed | BDH2P1    | pseudoger chr6   | 99622620 | 99623357 | + | 738   | 1.300716 | 0.670644 | 0.304797 | 0.121759 | 2.503275 | 0.013941 | 0.064041 | 1 |
| ENSG0000 | mucosal h | Inflamed | CLU10S    | protein_cc chr12 | 92813870 | 92821924 | - | 686   | 2.610979 | 0.52506  | -0.50653 | 0.202352 | -2.50318 | 0.013944 | 0.064045 | 1 |
| ENSG0000 | mucosal h | Inflamed | AF186192  | lincRNA chr8     | 1.46E+08 | 1.46E+08 | - | 572   | 5.625298 | 0.140811 | 0.411026 | 0.164217 | 2.502941 | 0.013953 | 0.064076 | 1 |
| ENSG0000 | mucosal h | Inflamed | MIR4482-1 | miRNA chr10      | 1.06E+08 | 1.06E+08 | - | 98    | 0.921241 | 0.73747  | 0.278675 | 0.111344 | 2.502828 | 0.013957 | 0.064084 | 1 |
| ENSG0000 | mucosal h | Inflamed | AC012358  | antisense chr2   | 55441523 | 55443262 | - | 916   | 5.322196 | 0.252983 | 0.531076 | 0.212202 | 2.50269  | 0.013963 | 0.064096 | 1 |
| ENSG0000 | mucosal h | Inflamed | AGAP2-AS  | protein_cc chr12 | 58120054 | 58122139 | + | 1500  | 225.1862 | 0        | -0.38849 | 0.155242 | -2.50248 | 0.013971 | 0.064121 | 1 |
| ENSG0000 | mucosal h | Inflamed | CTC-378H  | antisense chr19  | 42636707 | 42641251 | + | 897   | 11.27446 | 0.069212 | -0.56084 | 0.224138 | -2.50222 | 0.01398  | 0.064153 | 1 |
| ENSG0000 | mucosal h | Inflamed | MME       | protein_cc chr3  | 1.55E+08 | 1.55E+08 | + | 9566  | 520.5274 | 0.002387 | -0.93346 | 0.373097 | -2.50193 | 0.013991 | 0.064191 | 1 |
| ENSG0000 | mucosal h | Inflamed | RUNX2     | protein_cc chr6  | 45295894 | 45632086 | + | 8191  | 671.864  | 0        | -0.54824 | 0.219151 | -2.50164 | 0.014001 | 0.064229 | 1 |
| ENSG0000 | mucosal h | Inflamed | PLK1      | protein_cc chr16 | 23688977 | 23701688 | + | 4760  | 1145.115 | 0        | -0.38045 | 0.152095 | -2.5014  | 0.01401  | 0.064253 | 1 |
| ENSG0000 | mucosal h | Inflamed | GOLGA8I   | protein_cc chr15 | 23255242 | 23268823 | + | 5865  | 1.343675 | 0.668258 | 0.327564 | 0.130954 | 2.501371 | 0.014012 | 0.064253 | 1 |
| ENSG0000 | mucosal h | Inflamed | RP11-67L2 | lincRNA chr3     | 1.23E+08 | 1.23E+08 | + | 5456  | 303.2888 | 0        | 0.543771 | 0.217444 | 2.500743 | 0.014035 | 0.064349 | 1 |
| ENSG0000 | mucosal h | Inflamed | SCO1      | protein_cc chr17 | 10583654 | 10601692 | - | 2367  | 1081.487 | 0        | 0.289684 | 0.115848 | 2.500554 | 0.014042 | 0.06437  | 1 |
| ENSG0000 | mucosal h | Inflamed | KIF17     | protein_cc chr1  | 20990507 | 21044510 | - | 4470  | 45.54654 | 0        | -0.47809 | 0.191207 | -2.5004  | 0.014048 | 0.06437  | 1 |
| ENSG0000 | mucosal h | Inflamed | CKMT1B    | protein_cc chr15 | 43885252 | 43897099 | + | 3939  | 1653.16  | 0.002387 | 0.638595 | 0.255401 | 2.500361 | 0.014049 | 0.06437  | 1 |
| ENSG0000 | mucosal h | Inflamed | MT-TC     | Mt_tRNA chrM     | 5761     | 5826     | - | 66    | 53.358   | 0        | 0.559751 | 0.223875 | 2.500283 | 0.014052 | 0.06437  | 1 |
| ENSG0000 | mucosal h | Inflamed | TXNDC2    | protein_cc chr18 | 9885763  | 9889272  | + | 3352  | 2.026253 | 0.513126 | -0.39833 | 0.159317 | -2.50023 | 0.014054 | 0.06437  | 1 |
| ENSG0000 | mucosal h | Inflamed | ASGR2     | protein_cc chr17 | 7004641  | 7019019  | - | 2490  | 37.83771 | 0.004773 | -0.55685 | 0.222718 | -2.50023 | 0.014054 | 0.06437  | 1 |

|          |           |          |           |               |       |          |          |   |       |          |          |          |          |          |          |          |   |
|----------|-----------|----------|-----------|---------------|-------|----------|----------|---|-------|----------|----------|----------|----------|----------|----------|----------|---|
| ENSG0000 | mucosal h | Inflamed | PDSS1     | protein_cc    | chr10 | 26986588 | 27035727 | + | 1959  | 482.4606 | 0        | 0.368116 | 0.147237 | 2.500156 | 0.014057 | 0.064371 | 1 |
| ENSG0000 | mucosal h | Inflamed | CD22      | protein_cc    | chr19 | 35810164 | 35838258 | + | 5839  | 1455.737 | 0        | -0.95509 | 0.382038 | -2.49999 | 0.014063 | 0.064377 | 1 |
| ENSG0000 | mucosal h | Inflamed | KIAA1522  | protein_cc    | chr1  | 33207486 | 33240571 | + | 5965  | 15168.93 | 0        | 0.46726  | 0.186907 | 2.499965 | 0.014064 | 0.064377 | 1 |
| ENSG0000 | mucosal h | Inflamed | CENPV     | protein_cc    | chr17 | 16245848 | 16256970 | - | 2302  | 919.9833 | 0        | 0.44194  | 0.176784 | 2.499881 | 0.014067 | 0.064377 | 1 |
| ENSG0000 | mucosal h | Inflamed | PGAM1     | protein_cc    | chr10 | 99185917 | 99193198 | + | 2568  | 3104.368 | 0        | -0.20545 | 0.082186 | -2.49986 | 0.014068 | 0.064377 | 1 |
| ENSG0000 | mucosal h | Inflamed | DDX19B    | protein_cc    | chr16 | 70323566 | 70369186 | + | 4522  | 533.7661 | 0        | 0.191771 | 0.076746 | 2.498766 | 0.014109 | 0.064552 | 1 |
| ENSG0000 | mucosal h | Inflamed | IGHV4-28  | IG_V_gene     | chr14 | 1.07E+08 | 1.07E+08 | - | 423   | 155.4463 | 0.01432  | -0.95922 | 0.3839   | -2.49861 | 0.014114 | 0.064567 | 1 |
| ENSG0000 | mucosal h | Inflamed | RP11-1441 | pseudoger     | chr16 | 74701404 | 74702604 | + | 1201  | 1.200477 | 0.670644 | 0.310665 | 0.124363 | 2.498049 | 0.014136 | 0.064652 | 1 |
| ENSG0000 | mucosal h | Inflamed | RP11-6371 | lincRNA       | chr12 | 69068151 | 69081535 | - | 2845  | 5.916468 | 0.121718 | -0.50215 | 0.201023 | -2.49798 | 0.014138 | 0.064654 | 1 |
| ENSG0000 | mucosal h | Inflamed | KCTD9P2   | pseudoger     | chrX  | 1.05E+08 | 1.05E+08 | + | 1013  | 1.336516 | 0.618138 | 0.348941 | 0.139695 | 2.497871 | 0.014142 | 0.06466  | 1 |
| ENSG0000 | mucosal h | Inflamed | REM1      | protein_cc    | chr20 | 30063096 | 30072708 | + | 1665  | 118.673  | 0        | -0.61217 | 0.245096 | -2.49769 | 0.014149 | 0.06468  | 1 |
| ENSG0000 | mucosal h | Inflamed | RP5-1074L | antisense     | chr1  | 1.11E+08 | 1.11E+08 | - | 2611  | 12.60143 | 0.011933 | -0.30023 | 0.120232 | -2.4971  | 0.014171 | 0.064771 | 1 |
| ENSG0000 | mucosal h | Inflamed | WASH3P    | pseudoger     | chr15 | 1.03E+08 | 1.03E+08 | + | 2668  | 787.5203 | 0        | 0.281426 | 0.112707 | 2.49698  | 0.014176 | 0.064779 | 1 |
| ENSG0000 | mucosal h | Inflamed | RP11-197F | sense_intr    | chr9  | 77624744 | 77630952 | - | 670   | 2.279236 | 0.463007 | 0.432326 | 0.173168 | 2.496571 | 0.014191 | 0.064838 | 1 |
| ENSG0000 | mucosal h | Inflamed | RP11-650k | protein_cc    | chr12 | 1.04E+08 | 1.04E+08 | + | 674   | 1.508353 | 0.618138 | 0.391766 | 0.156927 | 2.496483 | 0.014194 | 0.064839 | 1 |
| ENSG0000 | mucosal h | Inflamed | CTB-36H1f | sense_ove     | chr5  | 1.22E+08 | 1.22E+08 | + | 2178  | 16.8401  | 0.040573 | 0.571474 | 0.228917 | 2.496426 | 0.014196 | 0.064839 | 1 |
| ENSG0000 | mucosal h | Inflamed | HSPA2     | protein_cc    | chr14 | 65002623 | 65009955 | + | 2841  | 1348.838 | 0        | 0.399066 | 0.159859 | 2.49637  | 0.014199 | 0.064839 | 1 |
| ENSG0000 | mucosal h | Inflamed | PDCL3     | protein_cc    | chr2  | 1.01E+08 | 1.01E+08 | + | 1831  | 476.3484 | 0        | 0.242875 | 0.097311 | 2.495871 | 0.014217 | 0.064914 | 1 |
| ENSG0000 | mucosal h | Inflamed | PGAP1     | protein_cc    | chr2  | 1.98E+08 | 1.98E+08 | - | 12761 | 377.1623 | 0.002387 | 0.621715 | 0.249113 | 2.495715 | 0.014223 | 0.064929 | 1 |
| ENSG0000 | mucosal h | Inflamed | AP000695  | protein_cc    | chr21 | 37858165 | 37860058 | + | 1894  | 2.634845 | 0.52506  | -0.52081 | 0.208704 | -2.49543 | 0.014234 | 0.064966 | 1 |
| ENSG0000 | mucosal h | Inflamed | OVOL1     | protein_cc    | chr11 | 65554493 | 65564690 | + | 3849  | 1845.172 | 0        | 0.647322 | 0.259418 | 2.495283 | 0.014239 | 0.064981 | 1 |
| ENSG0000 | mucosal h | Inflamed | AC114812  | pseudoger     | chr2  | 2.35E+08 | 2.35E+08 | + | 757   | 1.260143 | 0.704057 | 0.3397   | 0.13615  | 2.495043 | 0.014248 | 0.065011 | 1 |
| ENSG0000 | mucosal h | Inflamed | GNA14     | protein_cc    | chr9  | 80037995 | 80263223 | - | 2721  | 442.0692 | 0        | 0.4034   | 0.161694 | 2.494832 | 0.014256 | 0.065036 | 1 |
| ENSG0000 | mucosal h | Inflamed | LARP4B    | protein_cc    | chr10 | 855484   | 977564   | - | 10125 | 3746.964 | 0        | 0.320754 | 0.128586 | 2.494466 | 0.01427  | 0.065081 | 1 |
| ENSG0000 | mucosal h | Inflamed | RP11-61J1 | lincRNA       | chr1  | 2.13E+08 | 2.13E+08 | + | 1899  | 9.980907 | 0.100239 | 0.506227 | 0.202942 | 2.494441 | 0.014271 | 0.065081 | 1 |
| ENSG0000 | mucosal h | Inflamed | C19orf71  | protein_cc    | chr19 | 3539152  | 3544028  | + | 674   | 46.27446 | 0.02148  | 0.629389 | 0.252335 | 2.49426  | 0.014278 | 0.065101 | 1 |
| ENSG0000 | mucosal h | Inflamed | CHMP4BP1  | pseudoger     | chr14 | 55765362 | 55765949 | + | 588   | 5.02864  | 0.157518 | 0.475315 | 0.190586 | 2.493965 | 0.014289 | 0.065132 | 1 |
| ENSG0000 | mucosal h | Inflamed | CXCR4     | protein_cc    | chr2  | 1.37E+08 | 1.37E+08 | - | 2224  | 1297.604 | 0        | -0.61244 | 0.245572 | -2.49394 | 0.01429  | 0.065132 | 1 |
| ENSG0000 | mucosal h | Inflamed | ASLP1     | pseudoger     | chr22 | 23991400 | 23995521 | - | 637   | 17.75179 | 0.071599 | 0.596652 | 0.239286 | 2.493472 | 0.014308 | 0.065203 | 1 |
| ENSG0000 | mucosal h | Inflamed | ZNF737    | protein_cc    | chr19 | 20718631 | 20748615 | - | 3539  | 153.4821 | 0.011933 | 0.573178 | 0.229888 | 2.493288 | 0.014315 | 0.065223 | 1 |
| ENSG0000 | mucosal h | Inflamed | AC144521  | processed_chr | 3     | 18486516 | 18959184 | + | 7355  | 37.5895  | 0        | 0.443312 | 0.177831 | 2.492881 | 0.01433  | 0.065282 | 1 |
| ENSG0000 | mucosal h | Inflamed | MYO19     | protein_cc    | chr17 | 34851477 | 34899284 | - | 13095 | 2346.002 | 0        | 0.289359 | 0.116085 | 2.492643 | 0.014339 | 0.065309 | 1 |
| ENSG0000 | mucosal h | Inflamed | NUDT16L1  | protein_cc    | chr16 | 4743695  | 4745860  | + | 2068  | 1169.609 | 0        | 0.219064 | 0.087889 | 2.492501 | 0.014345 | 0.065309 | 1 |
| ENSG0000 | mucosal h | Inflamed | ICA1      | protein_cc    | chr7  | 8152814  | 8302317  | - | 4891  | 1154.675 | 0        | 0.380263 | 0.152564 | 2.492478 | 0.014346 | 0.065309 | 1 |
| ENSG0000 | mucosal h | Inflamed | SNRPD3    | protein_cc    | chr22 | 24951471 | 25005947 | + | 2544  | 1947.129 | 0        | 0.259294 | 0.104031 | 2.492461 | 0.014346 | 0.065309 | 1 |
| ENSG0000 | mucosal h | Inflamed | OTC       | protein_cc    | chrX  | 38211798 | 38280703 | + | 1585  | 119.0119 | 0.016706 | 0.984308 | 0.394968 | 2.492119 | 0.014359 | 0.065357 | 1 |
| ENSG0000 | mucosal h | Inflamed | TPCN1     | protein_cc    | chr12 | 1.14E+08 | 1.14E+08 | + | 8728  | 5761.609 | 0        | 0.260204 | 0.104415 | 2.492008 | 0.014363 | 0.065365 | 1 |
| ENSG0000 | mucosal h | Inflamed | RABGAP1   | protein_cc    | chr9  | 1.26E+08 | 1.26E+08 | + | 8181  | 1476.525 | 0        | 0.465556 | 0.186827 | 2.491904 | 0.014367 | 0.065372 | 1 |
| ENSG0000 | mucosal h | Inflamed | RP11-196C | sense_intr    | chr16 | 31129399 | 31130068 | + | 543   | 35.91885 | 0.031026 | 0.548672 | 0.220197 | 2.491732 | 0.014374 | 0.065379 | 1 |
| ENSG0000 | mucosal h | Inflamed | PLTP      | protein_cc    | chr20 | 44527399 | 44540794 | - | 2402  | 2864.146 | 0        | -0.48387 | 0.194188 | -2.49173 | 0.014374 | 0.065379 | 1 |

|          |           |          |           |            |       |          |          |   |       |          |          |          |          |          |          |          |   |
|----------|-----------|----------|-----------|------------|-------|----------|----------|---|-------|----------|----------|----------|----------|----------|----------|----------|---|
| ENSG0000 | mucosal h | Inflamed | WDR64     | protein_cc | chr1  | 2.42E+08 | 2.42E+08 | + | 4935  | 4.553699 | 0.252983 | -0.53682 | 0.215454 | -2.4916  | 0.014379 | 0.065391 | 1 |
| ENSG0000 | mucosal h | Inflamed | TMEM214   | protein_cc | chr2  | 27255778 | 27264563 | + | 4910  | 7648.578 | 0        | -0.21491 | 0.086258 | -2.4915  | 0.014383 | 0.065396 | 1 |
| ENSG0000 | mucosal h | Inflamed | CTB-50L17 | antisense  | chr19 | 4447301  | 4448214  | + | 540   | 15.33174 | 0.042959 | 0.466544 | 0.187273 | 2.491254 | 0.014392 | 0.065418 | 1 |
| ENSG0000 | mucosal h | Inflamed | PDCD4-AS  | antisense  | chr10 | 1.13E+08 | 1.13E+08 | - | 778   | 116.4057 | 0        | 0.234977 | 0.094321 | 2.491245 | 0.014392 | 0.065418 | 1 |
| ENSG0000 | mucosal h | Inflamed | RP11-64C1 | pseudoger  | chr18 | 12201981 | 12223538 | + | 2209  | 3.159905 | 0.443914 | 0.427015 | 0.17145  | 2.490616 | 0.014416 | 0.065515 | 1 |
| ENSG0000 | mucosal h | Inflamed | SMIM2-AS  | antisense  | chr13 | 44716682 | 44813010 | + | 546   | 79.93556 | 0.009547 | 0.658797 | 0.264519 | 2.490541 | 0.014419 | 0.065517 | 1 |
| ENSG0000 | mucosal h | Inflamed | RP11-68I3 | sense_intr | chr17 | 27896598 | 27897537 | + | 465   | 17.11217 | 0.052506 | 0.528923 | 0.212381 | 2.490445 | 0.014423 | 0.065521 | 1 |
| ENSG0000 | mucosal h | Inflamed | PHF23     | protein_cc | chr17 | 7138347  | 7143041  | - | 2783  | 1703.024 | 0        | -0.21527 | 0.086442 | -2.49039 | 0.014425 | 0.065521 | 1 |
| ENSG0000 | mucosal h | Inflamed | FHIT      | protein_cc | chr3  | 59735036 | 61237133 | - | 5439  | 194.7136 | 0        | 0.301076 | 0.1209   | 2.490294 | 0.014429 | 0.065526 | 1 |
| ENSG0000 | mucosal h | Inflamed | CELF3     | protein_cc | chr1  | 1.52E+08 | 1.52E+08 | - | 4439  | 58.50119 | 0.033413 | 0.796564 | 0.319899 | 2.490047 | 0.014438 | 0.065556 | 1 |
| ENSG0000 | mucosal h | Inflamed | KCTD16    | protein_cc | chr5  | 1.44E+08 | 1.44E+08 | + | 14294 | 3.465394 | 0.477327 | 0.685626 | 0.275353 | 2.489987 | 0.014444 | 0.065556 | 1 |
| ENSG0000 | mucosal h | Inflamed | RNF24     | protein_cc | chr20 | 3907956  | 3996229  | - | 7668  | 1625.461 | 0        | -0.47246 | 0.189753 | -2.48987 | 0.014445 | 0.065565 | 1 |
| ENSG0000 | mucosal h | Inflamed | IL17B     | protein_cc | chr5  | 1.49E+08 | 1.49E+08 | - | 1211  | 10.93795 | 0.054893 | -0.56546 | 0.227121 | -2.48967 | 0.014453 | 0.065586 | 1 |
| ENSG0000 | mucosal h | Inflamed | ZBTB46    | protein_cc | chr20 | 62375019 | 62462597 | - | 5955  | 516.716  | 0        | -0.44372 | 0.178232 | -2.48958 | 0.014456 | 0.065586 | 1 |
| ENSG0000 | mucosal h | Inflamed | CEP19     | protein_cc | chr3  | 1.96E+08 | 1.96E+08 | - | 2201  | 79.40095 | 0.002387 | -0.56331 | 0.226269 | -2.48956 | 0.014457 | 0.065586 | 1 |
| ENSG0000 | mucosal h | Inflamed | KCNE1     | protein_cc | chr21 | 35818988 | 35884573 | - | 5647  | 24.22912 | 0.038186 | -0.69369 | 0.278721 | -2.48882 | 0.014485 | 0.065683 | 1 |
| ENSG0000 | mucosal h | Inflamed | CCNF      | protein_cc | chr16 | 2479395  | 2508855  | + | 6309  | 775.2434 | 0        | -0.38475 | 0.154591 | -2.48881 | 0.014485 | 0.065683 | 1 |
| ENSG0000 | mucosal h | Inflamed | CNTD2     | protein_cc | chr19 | 40728115 | 40732597 | - | 2039  | 18.5895  | 0.02864  | -0.65259 | 0.262212 | -2.48877 | 0.014487 | 0.065683 | 1 |
| ENSG0000 | mucosal h | Inflamed | NDNL2     | protein_cc | chr15 | 29560353 | 29562033 | - | 1681  | 533.315  | 0        | -0.24195 | 0.097217 | -2.48873 | 0.014488 | 0.065683 | 1 |
| ENSG0000 | mucosal h | Inflamed | COQ5      | protein_cc | chr12 | 1.21E+08 | 1.21E+08 | - | 2523  | 625.8807 | 0        | 0.232967 | 0.093629 | 2.488192 | 0.014509 | 0.065755 | 1 |
| ENSG0000 | mucosal h | Inflamed | AC012485  | antisense  | chr2  | 2.39E+08 | 2.39E+08 | - | 563   | 6.680191 | 0.124105 | 0.485265 | 0.195028 | 2.488184 | 0.014509 | 0.065755 | 1 |
| ENSG0000 | mucosal h | Inflamed | GK5       | protein_cc | chr3  | 1.42E+08 | 1.42E+08 | - | 6027  | 558.8854 | 0        | 0.636811 | 0.25594  | 2.488125 | 0.014512 | 0.065755 | 1 |
| ENSG0000 | mucosal h | Inflamed | RP11-476I | lincRNA    | chr12 | 40534728 | 40536678 | - | 1951  | 2.073986 | 0.656325 | -0.55215 | 0.22192  | -2.48804 | 0.014515 | 0.065758 | 1 |
| ENSG0000 | mucosal h | Inflamed | ARL8A     | protein_cc | chr1  | 2.02E+08 | 2.02E+08 | - | 1973  | 1399.019 | 0        | -0.23091 | 0.092814 | -2.48788 | 0.014521 | 0.065775 | 1 |
| ENSG0000 | mucosal h | Inflamed | CTD-2008A | pseudoger  | chr15 | 45118569 | 45176892 | - | 2301  | 82.7327  | 0.002387 | -0.56276 | 0.226212 | -2.48776 | 0.014525 | 0.06578  | 1 |
| ENSG0000 | mucosal h | Inflamed | PTP4A1    | protein_cc | chr6  | 64231666 | 64293492 | + | 5796  | 9322.926 | 0        | 0.502173 | 0.201861 | 2.487718 | 0.014527 | 0.06578  | 1 |
| ENSG0000 | mucosal h | Inflamed | SHOX2     | protein_cc | chr3  | 1.58E+08 | 1.58E+08 | - | 3838  | 10.09069 | 0.140811 | -0.61571 | 0.247567 | -2.48702 | 0.014554 | 0.065881 | 1 |
| ENSG0000 | mucosal h | Inflamed | CX3CL1    | protein_cc | chr16 | 57406370 | 57418960 | + | 5983  | 1005.874 | 0        | -0.59201 | 0.238047 | -2.48694 | 0.014557 | 0.065881 | 1 |
| ENSG0000 | mucosal h | Inflamed | ZNF44     | protein_cc | chr19 | 12335501 | 12405702 | - | 6460  | 460.5084 | 0        | 0.570786 | 0.229517 | 2.486899 | 0.014559 | 0.065881 | 1 |
| ENSG0000 | mucosal h | Inflamed | NR1I2     | protein_cc | chr3  | 1.19E+08 | 1.2E+08  | + | 5381  | 1904.076 | 0.002387 | 0.801306 | 0.322213 | 2.486879 | 0.014559 | 0.065881 | 1 |
| ENSG0000 | mucosal h | Inflamed | CTD-2353F | antisense  | chr5  | 36666316 | 36725297 | - | 1159  | 11.15513 | 0.081146 | -0.50747 | 0.204092 | -2.4865  | 0.014574 | 0.065903 | 1 |
| ENSG0000 | mucosal h | Inflamed | WTIP      | protein_cc | chr19 | 34971874 | 34997258 | + | 8262  | 254.2434 | 0        | -0.48879 | 0.196579 | -2.48647 | 0.014575 | 0.065903 | 1 |
| ENSG0000 | mucosal h | Inflamed | RP11-355I | sense_ove  | chr14 | 62577593 | 62579268 | + | 1676  | 1.112172 | 0.727924 | -0.35593 | 0.143146 | -2.48645 | 0.014576 | 0.065903 | 1 |
| ENSG0000 | mucosal h | Inflamed | CD226     | protein_cc | chr18 | 67498394 | 67629039 | - | 3957  | 67.04057 | 0.01432  | -0.70974 | 0.285445 | -2.48642 | 0.014577 | 0.065903 | 1 |
| ENSG0000 | mucosal h | Inflamed | RP11-771F | pseudoger  | chr8  | 1.05E+08 | 1.05E+08 | + | 749   | 0.880668 | 0.787589 | 0.291149 | 0.117095 | 2.486424 | 0.014577 | 0.065903 | 1 |
| ENSG0000 | mucosal h | Inflamed | LYRM7     | protein_cc | chr5  | 1.31E+08 | 1.31E+08 | + | 6351  | 436.8138 | 0        | 0.531876 | 0.213919 | 2.486347 | 0.01458  | 0.065906 | 1 |
| ENSG0000 | mucosal h | Inflamed | MID1IP1-A | antisense  | chrX  | 38660821 | 38663136 | - | 376   | 1.914081 | 0.484487 | 0.340637 | 0.13701  | 2.486228 | 0.014585 | 0.065915 | 1 |
| ENSG0000 | mucosal h | Inflamed | PLEKHS1   | protein_cc | chr10 | 1.16E+08 | 1.16E+08 | + | 5402  | 1033.632 | 0        | -0.72331 | 0.290967 | -2.48589 | 0.014597 | 0.065959 | 1 |
| ENSG0000 | mucosal h | Inflamed | TPTE2P1   | pseudoger  | chr13 | 25498815 | 25542625 | - | 1709  | 6.131265 | 0.121718 | 0.447898 | 0.18018  | 2.485844 | 0.014599 | 0.065959 | 1 |
| ENSG0000 | mucosal h | Inflamed | C3orf52   | protein_cc | chr3  | 1.12E+08 | 1.12E+08 | + | 6021  | 757.9356 | 0        | 0.558013 | 0.224484 | 2.48576  | 0.014603 | 0.065962 | 1 |

|          |           |          |           |            |       |          |          |   |       |          |          |          |          |          |          |          |   |
|----------|-----------|----------|-----------|------------|-------|----------|----------|---|-------|----------|----------|----------|----------|----------|----------|----------|---|
| ENSG0000 | mucosal h | Inflamed | FMNL3     | protein_cc | chr12 | 50031724 | 50101948 | - | 11982 | 2447.007 | 0        | -0.51056 | 0.20548  | -2.48472 | 0.014643 | 0.066133 | 1 |
| ENSG0000 | mucosal h | Inflamed | PMS2P9    | pseudoger  | chr7  | 76669261 | 76673093 | + | 515   | 2.420048 | 0.472554 | 0.420603 | 0.169297 | 2.484408 | 0.014655 | 0.066173 | 1 |
| ENSG0000 | mucosal h | Inflamed | ITPRIP    | protein_cc | chr10 | 1.06E+08 | 1.06E+08 | - | 4588  | 1131.124 | 0        | -0.52927 | 0.213041 | -2.48434 | 0.014657 | 0.066173 | 1 |
| ENSG0000 | mucosal h | Inflamed | RP11-206F | pseudoger  | chr4  | 1.54E+08 | 1.54E+08 | + | 762   | 4.460621 | 0.126492 | 0.372059 | 0.149769 | 2.484214 | 0.014662 | 0.066173 | 1 |
| ENSG0000 | mucosal h | Inflamed | PTGFR     | protein_cc | chr1  | 78769568 | 79005434 | + | 4714  | 204.1384 | 0.004773 | -0.92653 | 0.372968 | -2.48421 | 0.014663 | 0.066173 | 1 |
| ENSG0000 | mucosal h | Inflamed | EPSTI1    | protein_cc | chr13 | 43460524 | 43566407 | - | 4924  | 1069.673 | 0        | -0.4979  | 0.200432 | -2.48413 | 0.014666 | 0.066173 | 1 |
| ENSG0000 | mucosal h | Inflamed | RP11-1267 | pseudoger  | chr4  | 69570318 | 69578216 | - | 750   | 4.455847 | 0.295943 | 0.573473 | 0.230858 | 2.4841   | 0.014667 | 0.066173 | 1 |
| ENSG0000 | mucosal h | Inflamed | PELO      | protein_cc | chr5  | 52083774 | 52099880 | + | 4349  | 565.4582 | 0        | -0.23296 | 0.093794 | -2.4837  | 0.014682 | 0.066228 | 1 |
| ENSG0000 | mucosal h | Inflamed | CDR2L     | protein_cc | chr17 | 72983727 | 73001895 | + | 3536  | 639.2005 | 0        | -0.53878 | 0.216937 | -2.48355 | 0.014688 | 0.066228 | 1 |
| ENSG0000 | mucosal h | Inflamed | SIRT2     | protein_cc | chr19 | 39369197 | 39390502 | - | 6204  | 2065.757 | 0        | -0.17421 | 0.070147 | -2.48354 | 0.014688 | 0.066228 | 1 |
| ENSG0000 | mucosal h | Inflamed | AOC1      | protein_cc | chr7  | 1.51E+08 | 1.51E+08 | + | 3824  | 24254.15 | 0        | 0.703397 | 0.283226 | 2.48352  | 0.014689 | 0.066228 | 1 |
| ENSG0000 | mucosal h | Inflamed | RASA3     | protein_cc | chr13 | 1.15E+08 | 1.15E+08 | - | 4352  | 1623.272 | 0        | -0.45459 | 0.183063 | -2.48324 | 0.0147   | 0.066257 | 1 |
| ENSG0000 | mucosal h | Inflamed | MASP1     | protein_cc | chr3  | 1.87E+08 | 1.87E+08 | - | 12292 | 1342.337 | 0        | -1.07571 | 0.433189 | -2.48323 | 0.014701 | 0.066257 | 1 |
| ENSG0000 | mucosal h | Inflamed | DMTN      | protein_cc | chr8  | 21906506 | 21940038 | + | 4511  | 1684.582 | 0        | 0.346571 | 0.139576 | 2.483028 | 0.014708 | 0.066271 | 1 |
| ENSG0000 | mucosal h | Inflamed | AC156455  | processed  | chr12 | 1.23E+08 | 1.23E+08 | + | 1831  | 29.27924 | 0.002387 | 0.432212 | 0.174068 | 2.483015 | 0.014709 | 0.066271 | 1 |
| ENSG0000 | mucosal h | Inflamed | CIB2      | protein_cc | chr15 | 78396948 | 78423886 | - | 2146  | 459.1933 | 0        | 0.371072 | 0.149457 | 2.482808 | 0.014717 | 0.066296 | 1 |
| ENSG0000 | mucosal h | Inflamed | LINC00483 | processed  | chr17 | 48838390 | 48844918 | - | 3663  | 838.0764 | 0.00716  | 0.852302 | 0.343309 | 2.482609 | 0.014725 | 0.06632  | 1 |
| ENSG0000 | mucosal h | Inflamed | CYBB      | protein_cc | chrX  | 37639264 | 37672714 | + | 4423  | 2415.076 | 0        | -0.60023 | 0.241798 | -2.48237 | 0.014734 | 0.066351 | 1 |
| ENSG0000 | mucosal h | Inflamed | HSPA8P15  | pseudoger  | chr6  | 1.52E+08 | 1.52E+08 | - | 786   | 7.202864 | 0.167064 | 0.534267 | 0.215256 | 2.482009 | 0.014748 | 0.066402 | 1 |
| ENSG0000 | mucosal h | Inflamed | RP11-297L | lincRNA    | chr16 | 52641261 | 52647820 | + | 1137  | 17.60859 | 0.0358   | 0.578308 | 0.233006 | 2.481942 | 0.01475  | 0.066402 | 1 |
| ENSG0000 | mucosal h | Inflamed | RP3-337H  | antisense  | chr6  | 43529609 | 43530156 | + | 548   | 1.77327  | 0.529833 | 0.355886 | 0.143399 | 2.481787 | 0.014756 | 0.066418 | 1 |
| ENSG0000 | mucosal h | Inflamed | WDR72     | protein_cc | chr15 | 53805938 | 54055075 | - | 8572  | 49.48926 | 0.085919 | 0.925192 | 0.372838 | 2.481482 | 0.014768 | 0.06646  | 1 |
| ENSG0000 | mucosal h | Inflamed | SPHK2     | protein_cc | chr19 | 49122548 | 49133974 | + | 6008  | 1569.181 | 0        | 0.30877  | 0.124436 | 2.481355 | 0.014773 | 0.066471 | 1 |
| ENSG0000 | mucosal h | Inflamed | RP11-532F | lincRNA    | chr6  | 711533   | 750729   | + | 423   | 0.830549 | 0.792363 | 0.283015 | 0.114065 | 2.481165 | 0.014781 | 0.066493 | 1 |
| ENSG0000 | mucosal h | Inflamed | RP11-545A | sense_ove  | chr1  | 1.8E+08  | 1.8E+08  | + | 934   | 1.00716  | 0.720764 | 0.319894 | 0.128951 | 2.480733 | 0.014798 | 0.066536 | 1 |
| ENSG0000 | mucosal h | Inflamed | RP4-791M  | antisense  | chr1  | 1.45E+08 | 1.45E+08 | - | 869   | 19.67303 | 0.045346 | 0.603886 | 0.243438 | 2.480659 | 0.0148   | 0.066536 | 1 |
| ENSG0000 | mucosal h | Inflamed | CR2       | protein_cc | chr1  | 2.08E+08 | 2.08E+08 | + | 4885  | 1274.301 | 0.002387 | -1.34925 | 0.543908 | -2.48065 | 0.014801 | 0.066536 | 1 |
| ENSG0000 | mucosal h | Inflamed | SLFN5     | protein_cc | chr17 | 33570055 | 33600674 | + | 10709 | 1257.589 | 0        | -0.67815 | 0.273378 | -2.48063 | 0.014802 | 0.066536 | 1 |
| ENSG0000 | mucosal h | Inflamed | PVRL2     | protein_cc | chr19 | 45349432 | 45392485 | + | 3747  | 6882.821 | 0        | -0.29494 | 0.118898 | -2.48059 | 0.014803 | 0.066536 | 1 |
| ENSG0000 | mucosal h | Inflamed | FXVD4     | protein_cc | chr10 | 43867090 | 43871783 | + | 774   | 2.670644 | 0.508353 | 0.523824 | 0.211182 | 2.480437 | 0.014809 | 0.066552 | 1 |
| ENSG0000 | mucosal h | Inflamed | CLDN19    | protein_cc | chr1  | 43198764 | 43205925 | - | 3602  | 2.775656 | 0.460621 | 0.48564  | 0.195797 | 2.48033  | 0.014813 | 0.06656  | 1 |
| ENSG0000 | mucosal h | Inflamed | HOMER3    | protein_cc | chr19 | 19040010 | 19052070 | - | 3422  | 310.3914 | 0        | -0.43392 | 0.174958 | -2.48014 | 0.014821 | 0.066582 | 1 |
| ENSG0000 | mucosal h | Inflamed | RHPN1-AS  | antisense  | chr8  | 1.44E+08 | 1.44E+08 | - | 1918  | 14.04773 | 0.023866 | -0.40496 | 0.163319 | -2.47956 | 0.014843 | 0.066673 | 1 |
| ENSG0000 | mucosal h | Inflamed | AC008984  | processed  | chr19 | 54820182 | 54848439 | - | 1738  | 14.34606 | 0.272076 | -0.80494 | 0.324702 | -2.47902 | 0.014864 | 0.066736 | 1 |
| ENSG0000 | mucosal h | Inflamed | KIAA1377  | protein_cc | chr11 | 1.02E+08 | 1.02E+08 | + | 8191  | 103.1504 | 0.002387 | 0.601354 | 0.242578 | 2.479014 | 0.014865 | 0.066736 | 1 |
| ENSG0000 | mucosal h | Inflamed | IGF1R     | protein_cc | chr15 | 99192200 | 99507759 | + | 13509 | 2530.885 | 0        | 0.482942 | 0.194814 | 2.478989 | 0.014866 | 0.066736 | 1 |
| ENSG0000 | mucosal h | Inflamed | AP001062  | antisense  | chr21 | 45751117 | 45755734 | + | 4354  | 154.0406 | 0        | 0.359587 | 0.145057 | 2.478941 | 0.014868 | 0.066736 | 1 |
| ENSG0000 | mucosal h | Inflamed | ESRP1     | protein_cc | chr8  | 95653302 | 95719694 | + | 4875  | 5488.451 | 0        | 0.712408 | 0.287418 | 2.47865  | 0.014879 | 0.066775 | 1 |
| ENSG0000 | mucosal h | Inflamed | RP11-488L | pseudoger  | chr1  | 2.47E+08 | 2.47E+08 | - | 1670  | 2.539379 | 0.477327 | 0.442856 | 0.178675 | 2.478557 | 0.014883 | 0.06678  | 1 |
| ENSG0000 | mucosal h | Inflamed | CASC8     | antisense  | chr8  | 1.28E+08 | 1.28E+08 | - | 2342  | 11.06205 | 0.152745 | -0.67373 | 0.271851 | -2.47832 | 0.014892 | 0.066801 | 1 |

|          |           |          |           |            |       |          |          |   |       |          |          |          |          |          |          |          |   |
|----------|-----------|----------|-----------|------------|-------|----------|----------|---|-------|----------|----------|----------|----------|----------|----------|----------|---|
| ENSG0000 | mucosal h | Inflamed | DLEU1     | protein_cc | chr13 | 50656307 | 51297372 | + | 9926  | 137.0286 | 0        | 0.348905 | 0.140783 | 2.478309 | 0.014892 | 0.066801 | 1 |
| ENSG0000 | mucosal h | Inflamed | KIAA1324L | protein_cc | chr7  | 86506222 | 86689015 | - | 8115  | 236.4988 | 0        | 0.667355 | 0.269306 | 2.47805  | 0.014903 | 0.066835 | 1 |
| ENSG0000 | mucosal h | Inflamed | ARL4C     | protein_cc | chr2  | 2.35E+08 | 2.35E+08 | - | 4013  | 1244.458 | 0        | -0.45229 | 0.182529 | -2.4779  | 0.014909 | 0.066838 | 1 |
| ENSG0000 | mucosal h | Inflamed | SDSL      | protein_cc | chr12 | 1.14E+08 | 1.14E+08 | + | 2216  | 509.148  | 0        | 0.273513 | 0.110382 | 2.477877 | 0.014909 | 0.066838 | 1 |
| ENSG0000 | mucosal h | Inflamed | MYLK      | protein_cc | chr3  | 1.23E+08 | 1.24E+08 | - | 22166 | 4848.792 | 0        | 0.451299 | 0.182134 | 2.477842 | 0.014911 | 0.066838 | 1 |
| ENSG0000 | mucosal h | Inflamed | HSP90B1   | protein_cc | chr12 | 1.04E+08 | 1.04E+08 | + | 4688  | 23889.15 | 0        | -0.45457 | 0.183481 | -2.47751 | 0.014924 | 0.066885 | 1 |
| ENSG0000 | mucosal h | Inflamed | RNF19B    | protein_cc | chr1  | 33402046 | 33430286 | - | 2610  | 3895.902 | 0        | -0.32642 | 0.13178  | -2.47702 | 0.014943 | 0.06696  | 1 |
| ENSG0000 | mucosal h | Inflamed | TTC18     | protein_cc | chr10 | 75013517 | 75118617 | - | 7424  | 50.99284 | 0.011933 | 0.678708 | 0.274055 | 2.476544 | 0.014962 | 0.067032 | 1 |
| ENSG0000 | mucosal h | Inflamed | AL137127. | miRNA      | chr1  | 19410046 | 19410145 | - | 100   | 4.054893 | 0.257757 | 0.479415 | 0.193636 | 2.475855 | 0.014989 | 0.067138 | 1 |
| ENSG0000 | mucosal h | Inflamed | MTND2P2.  | pseudoger  | chr1  | 565020   | 566063   | + | 1044  | 3678.723 | 0        | 0.478938 | 0.193446 | 2.475817 | 0.014991 | 0.067138 | 1 |
| ENSG0000 | mucosal h | Inflamed | ZNF565    | protein_cc | chr19 | 36673188 | 36737159 | - | 3727  | 94.40573 | 0        | 0.368751 | 0.149019 | 2.474532 | 0.015041 | 0.067345 | 1 |
| ENSG0000 | mucosal h | Inflamed | RP11-492E | antisense  | chr9  | 1.32E+08 | 1.32E+08 | + | 2449  | 18.94749 | 0.01432  | -0.58526 | 0.236513 | -2.47452 | 0.015042 | 0.067345 | 1 |
| ENSG0000 | mucosal h | Inflamed | THAP10    | protein_cc | chr15 | 71173681 | 71185124 | - | 2399  | 80.6778  | 0.002387 | 0.352039 | 0.142274 | 2.474364 | 0.015048 | 0.067361 | 1 |
| ENSG0000 | mucosal h | Inflamed | STAT2     | protein_cc | chr12 | 56735381 | 56753939 | - | 6109  | 5523.337 | 0        | -0.39046 | 0.157864 | -2.47337 | 0.015087 | 0.067526 | 1 |
| ENSG0000 | mucosal h | Inflamed | KIF25-AS1 | lincRNA    | chr6  | 1.68E+08 | 1.68E+08 | - | 3088  | 9.095465 | 0.26253  | -0.56628 | 0.22897  | -2.47315 | 0.015096 | 0.067554 | 1 |
| ENSG0000 | mucosal h | Inflamed | CHSY3     | protein_cc | chr5  | 1.29E+08 | 1.3E+08  | + | 3938  | 57.33174 | 0.02148  | -0.63993 | 0.258767 | -2.47301 | 0.015102 | 0.067566 | 1 |
| ENSG0000 | mucosal h | Inflamed | SCEL      | protein_cc | chr13 | 78109809 | 78219398 | + | 4205  | 63.98807 | 0.0358   | 0.939493 | 0.379937 | 2.472763 | 0.015112 | 0.06759  | 1 |
| ENSG0000 | mucosal h | Inflamed | GPR17     | protein_cc | chr2  | 1.28E+08 | 1.28E+08 | + | 2671  | 35.43198 | 0.026253 | 0.665602 | 0.269175 | 2.472753 | 0.015112 | 0.06759  | 1 |
| ENSG0000 | mucosal h | Inflamed | HNRNPUL2  | protein_cc | chr11 | 62480102 | 62494821 | - | 5293  | 2825.055 | 0        | 0.247104 | 0.099958 | 2.472084 | 0.015139 | 0.067697 | 1 |
| ENSG0000 | mucosal h | Inflamed | LINC01057 | lincRNA    | chr1  | 95104017 | 95285837 | - | 2357  | 169.0549 | 0        | 0.357566 | 0.144669 | 2.471608 | 0.015158 | 0.067771 | 1 |
| ENSG0000 | mucosal h | Inflamed | ASS1      | protein_cc | chr9  | 1.33E+08 | 1.33E+08 | + | 3050  | 20792.42 | 0        | -0.55251 | 0.22356  | -2.47139 | 0.015166 | 0.067798 | 1 |
| ENSG0000 | mucosal h | Inflamed | SIAH1     | protein_cc | chr16 | 48390275 | 48482313 | - | 6725  | 683.0119 | 0        | 0.358488 | 0.145072 | 2.471094 | 0.015178 | 0.067839 | 1 |
| ENSG0000 | mucosal h | Inflamed | NFS1      | protein_cc | chr20 | 34255977 | 34287281 | - | 6024  | 705.1384 | 0        | 0.198716 | 0.08043  | 2.47068  | 0.015195 | 0.067901 | 1 |
| ENSG0000 | mucosal h | Inflamed | ZC3H14    | protein_cc | chr14 | 89029253 | 89079853 | + | 6890  | 1421.174 | 0        | 0.401317 | 0.162437 | 2.470607 | 0.015197 | 0.067903 | 1 |
| ENSG0000 | mucosal h | Inflamed | MYO5C     | protein_cc | chr15 | 52484519 | 52587995 | - | 10045 | 2581.737 | 0        | 0.630947 | 0.255415 | 2.470281 | 0.01521  | 0.06795  | 1 |
| ENSG0000 | mucosal h | Inflamed | GLYCK     | protein_cc | chr3  | 52321105 | 52329272 | + | 4793  | 1366.547 | 0        | 0.365027 | 0.147828 | 2.469267 | 0.015251 | 0.068106 | 1 |
| ENSG0000 | mucosal h | Inflamed | CTD-2517f | antisense  | chr8  | 1.46E+08 | 1.46E+08 | + | 338   | 32.14558 | 0.016706 | 0.43168  | 0.174825 | 2.469211 | 0.015253 | 0.068106 | 1 |
| ENSG0000 | mucosal h | Inflamed | MAB21L3   | protein_cc | chr1  | 1.17E+08 | 1.17E+08 | + | 3256  | 73.4821  | 0.009547 | 0.674703 | 0.273246 | 2.46921  | 0.015253 | 0.068106 | 1 |
| ENSG0000 | mucosal h | Inflamed | RP11-411k | lincRNA    | chr6  | 53794820 | 53862465 | + | 3227  | 1.279236 | 0.725537 | -0.39378 | 0.159483 | -2.46909 | 0.015258 | 0.068106 | 1 |
| ENSG0000 | mucosal h | Inflamed | RP5-1033f | antisense  | chr1  | 94057756 | 94071130 | + | 1954  | 279.5418 | 0.004773 | 0.601963 | 0.2438   | 2.469084 | 0.015258 | 0.068106 | 1 |
| ENSG0000 | mucosal h | Inflamed | RP11-7F18 | lincRNA    | chr8  | 68256210 | 68257322 | + | 1113  | 11.43198 | 0.069212 | 0.499002 | 0.202108 | 2.468989 | 0.015262 | 0.068111 | 1 |
| ENSG0000 | mucosal h | Inflamed | QPRT      | protein_cc | chr16 | 29674600 | 29710020 | + | 3680  | 1407.78  | 0        | 0.383832 | 0.155477 | 2.468746 | 0.015272 | 0.068143 | 1 |
| ENSG0000 | mucosal h | Inflamed | PDXDC1    | protein_cc | chr16 | 15068448 | 15233196 | + | 8908  | 10527.02 | 0        | 0.357657 | 0.144879 | 2.468666 | 0.015275 | 0.068146 | 1 |
| ENSG0000 | mucosal h | Inflamed | PPP1CC    | protein_cc | chr12 | 1.11E+08 | 1.11E+08 | - | 6902  | 5413.659 | 0        | 0.339068 | 0.137363 | 2.468414 | 0.015285 | 0.06818  | 1 |
| ENSG0000 | mucosal h | Inflamed | AC004381  | antisense  | chr16 | 20754985 | 20777942 | - | 351   | 2.095465 | 0.477327 | 0.357991 | 0.145061 | 2.467861 | 0.015308 | 0.068266 | 1 |
| ENSG0000 | mucosal h | Inflamed | HNRNPA1f  | pseudoger  | chr3  | 39376470 | 39377430 | + | 961   | 16.9642  | 0.150358 | -0.70424 | 0.285372 | -2.46778 | 0.015311 | 0.068266 | 1 |
| ENSG0000 | mucosal h | Inflamed | UQCC1     | protein_cc | chr20 | 33890369 | 33999944 | - | 6916  | 1268.162 | 0        | 0.220499 | 0.089353 | 2.467723 | 0.015313 | 0.068266 | 1 |
| ENSG0000 | mucosal h | Inflamed | CHRD      | protein_cc | chr3  | 1.84E+08 | 1.84E+08 | + | 6620  | 309.895  | 0        | -0.58105 | 0.235463 | -2.46767 | 0.015315 | 0.068266 | 1 |
| ENSG0000 | mucosal h | Inflamed | RAET1L    | protein_cc | chr6  | 1.5E+08  | 1.5E+08  | - | 1346  | 7.312649 | 0.377088 | 0.757543 | 0.307021 | 2.467395 | 0.015326 | 0.068305 | 1 |
| ENSG0000 | mucosal h | Inflamed | DCDC2B    | protein_cc | chr1  | 32674695 | 32681797 | + | 1869  | 0.906921 | 0.78043  | 0.346257 | 0.140342 | 2.46724  | 0.015333 | 0.068321 | 1 |

|          |           |          |           |            |       |          |          |   |       |          |          |          |          |          |          |          |   |
|----------|-----------|----------|-----------|------------|-------|----------|----------|---|-------|----------|----------|----------|----------|----------|----------|----------|---|
| ENSG0000 | mucosal h | Inflamed | USP18     | protein_cc | chr22 | 18632666 | 18660164 | + | 2129  | 180.8592 | 0        | -0.33666 | 0.136469 | -2.46693 | 0.015345 | 0.068354 | 1 |
| ENSG0000 | mucosal h | Inflamed | ZBED3     | protein_cc | chr5  | 76367897 | 76383148 | - | 6514  | 746.7709 | 0        | 0.387883 | 0.157236 | 2.466882 | 0.015347 | 0.068354 | 1 |
| ENSG0000 | mucosal h | Inflamed | RP4-773N  | antisense  | chr1  | 1.11E+08 | 1.11E+08 | + | 4216  | 449.7661 | 0        | 0.366458 | 0.148553 | 2.466848 | 0.015348 | 0.068354 | 1 |
| ENSG0000 | mucosal h | Inflamed | LINC00403 | lincRNA    | chr13 | 1.13E+08 | 1.13E+08 | + | 545   | 1.331742 | 0.701671 | 0.360816 | 0.146272 | 2.466747 | 0.015352 | 0.068354 | 1 |
| ENSG0000 | mucosal h | Inflamed | RNF113A   | protein_cc | chrX  | 1.19E+08 | 1.19E+08 | - | 1295  | 417.8711 | 0        | -0.22005 | 0.089212 | -2.46661 | 0.015358 | 0.068354 | 1 |
| ENSG0000 | mucosal h | Inflamed | JMJD4     | protein_cc | chr1  | 2.28E+08 | 2.28E+08 | - | 4315  | 658.8783 | 0        | -0.21186 | 0.085895 | -2.46656 | 0.01536  | 0.068354 | 1 |
| ENSG0000 | mucosal h | Inflamed | CTD-3128  | antisense  | chr19 | 6748304  | 6751478  | - | 686   | 35.43675 | 0.01432  | 0.605    | 0.245282 | 2.466545 | 0.015361 | 0.068354 | 1 |
| ENSG0000 | mucosal h | Inflamed | NTMT1     | protein_cc | chr9  | 1.32E+08 | 1.32E+08 | + | 2674  | 678.2458 | 0        | -0.21426 | 0.086868 | -2.46654 | 0.015361 | 0.068354 | 1 |
| ENSG0000 | mucosal h | Inflamed | AGPAT4    | protein_cc | chr6  | 1.62E+08 | 1.62E+08 | - | 9419  | 799.327  | 0        | -0.50419 | 0.204418 | -2.46644 | 0.015365 | 0.06836  | 1 |
| ENSG0000 | mucosal h | Inflamed | MFAP5     | protein_cc | chr12 | 8789942  | 8815484  | - | 3876  | 153.7351 | 0.002387 | 0.856194 | 0.34719  | 2.466069 | 0.01538  | 0.068415 | 1 |
| ENSG0000 | mucosal h | Inflamed | MFN2      | protein_cc | chr1  | 12040238 | 12073571 | + | 4973  | 5991.94  | 0        | 0.261988 | 0.106246 | 2.465874 | 0.015388 | 0.068439 | 1 |
| ENSG0000 | mucosal h | Inflamed | FZD1      | protein_cc | chr7  | 90893783 | 90898123 | + | 4341  | 1353.2   | 0        | 0.329463 | 0.133622 | 2.465633 | 0.015397 | 0.06847  | 1 |
| ENSG0000 | mucosal h | Inflamed | KCTD3     | protein_cc | chr1  | 2.16E+08 | 2.16E+08 | + | 4929  | 1429.332 | 0        | 0.469343 | 0.190379 | 2.465309 | 0.01541  | 0.068517 | 1 |
| ENSG0000 | mucosal h | Inflamed | CTC-508F8 | antisense  | chr16 | 21132079 | 21141429 | + | 405   | 1.336516 | 0.630072 | -0.35701 | 0.144826 | -2.4651  | 0.015419 | 0.068543 | 1 |
| ENSG0000 | mucosal h | Inflamed | RP11-588k | sense_ove  | chr4  | 1.57E+08 | 1.57E+08 | + | 2615  | 149.6587 | 0.009547 | -0.81201 | 0.329454 | -2.46473 | 0.015434 | 0.068589 | 1 |
| ENSG0000 | mucosal h | Inflamed | RP11-425f | antisense  | chr6  | 1.1E+08  | 1.1E+08  | + | 872   | 19.09785 | 0.01432  | 0.488866 | 0.198347 | 2.464706 | 0.015435 | 0.068589 | 1 |
| ENSG0000 | mucosal h | Inflamed | CTD-2260f | antisense  | chr5  | 96120481 | 96121703 | + | 1001  | 17.14081 | 0.107399 | 0.675757 | 0.27418  | 2.46465  | 0.015437 | 0.068589 | 1 |
| ENSG0000 | mucosal h | Inflamed | CTD-2554c | pseudoger  | chr19 | 38270326 | 38283505 | + | 1432  | 7.785203 | 0.040573 | 0.348684 | 0.1415   | 2.464197 | 0.015456 | 0.068659 | 1 |
| ENSG0000 | mucosal h | Inflamed | RP5-894A1 | antisense  | chr7  | 1.41E+08 | 1.41E+08 | - | 770   | 82.41527 | 0        | 0.539795 | 0.219077 | 2.463947 | 0.015466 | 0.068693 | 1 |
| ENSG0000 | mucosal h | Inflamed | CTD-3216f | sense_intr | chr20 | 32869438 | 32874272 | - | 586   | 6.551313 | 0.121718 | 0.448948 | 0.182221 | 2.463751 | 0.015474 | 0.068717 | 1 |
| ENSG0000 | mucosal h | Inflamed | GLYATL1   | protein_cc | chr11 | 58672871 | 58811000 | + | 5440  | 22.79475 | 0.059666 | -0.86113 | 0.349531 | -2.46366 | 0.015477 | 0.068721 | 1 |
| ENSG0000 | mucosal h | Inflamed | SPATA31E  | protein_cc | chr9  | 90497741 | 90503814 | + | 4478  | 0.976134 | 0.792363 | 0.253097 | 0.102742 | 2.463433 | 0.015487 | 0.068748 | 1 |
| ENSG0000 | mucosal h | Inflamed | MNX1-AS2  | antisense  | chr7  | 1.57E+08 | 1.57E+08 | + | 374   | 2.665871 | 0.470167 | 0.37262  | 0.151264 | 2.463383 | 0.015489 | 0.068748 | 1 |
| ENSG0000 | mucosal h | Inflamed | PARM1     | protein_cc | chr4  | 75858305 | 75975325 | + | 5034  | 18062.02 | 0        | 0.49887  | 0.202525 | 2.463246 | 0.015494 | 0.068761 | 1 |
| ENSG0000 | mucosal h | Inflamed | LINC00265 | lincRNA    | chr7  | 39773231 | 39832691 | + | 3115  | 324.3484 | 0.02148  | 0.547714 | 0.222413 | 2.462592 | 0.015521 | 0.068868 | 1 |
| ENSG0000 | mucosal h | Inflamed | KLF9      | protein_cc | chr9  | 72999503 | 73029540 | - | 5185  | 1469.63  | 0        | 0.473645 | 0.192352 | 2.462383 | 0.015529 | 0.068894 | 1 |
| ENSG0000 | mucosal h | Inflamed | ANKRD24   | protein_cc | chr19 | 4183351  | 4224811  | + | 4474  | 62.54893 | 0.009547 | 0.432597 | 0.17569  | 2.462282 | 0.015533 | 0.068901 | 1 |
| ENSG0000 | mucosal h | Inflamed | ZP3       | protein_cc | chr7  | 76026835 | 76071388 | + | 2716  | 115.4248 | 0        | 0.407201 | 0.165388 | 2.462091 | 0.015541 | 0.068923 | 1 |
| ENSG0000 | mucosal h | Inflamed | CSRP1     | protein_cc | chr1  | 2.01E+08 | 2.01E+08 | - | 10318 | 8898.589 | 0        | 0.281559 | 0.114377 | 2.461668 | 0.015558 | 0.068988 | 1 |
| ENSG0000 | mucosal h | Inflamed | MEP1A     | protein_cc | chr6  | 46761127 | 46807515 | + | 2892  | 6999.162 | 0        | 0.940797 | 0.382217 | 2.461424 | 0.015568 | 0.069021 | 1 |
| ENSG0000 | mucosal h | Inflamed | DNAH7     | protein_cc | chr2  | 1.97E+08 | 1.97E+08 | - | 21324 | 44.18138 | 0        | 0.588376 | 0.23906  | 2.46121  | 0.015577 | 0.069048 | 1 |
| ENSG0000 | mucosal h | Inflamed | PRSS45    | protein_cc | chr3  | 46783582 | 46854048 | - | 3128  | 1.899761 | 0.551313 | 0.385504 | 0.156637 | 2.461133 | 0.01558  | 0.06905  | 1 |
| ENSG0000 | mucosal h | Inflamed | RP11-885E | lincRNA    | chr12 | 2870366  | 2879621  | - | 550   | 1.326969 | 0.658711 | 0.331548 | 0.134719 | 2.461034 | 0.015584 | 0.069056 | 1 |
| ENSG0000 | mucosal h | Inflamed | CTD-2010f | pseudoger  | chr11 | 6509416  | 6510607  | - | 686   | 7.684964 | 0.073986 | 0.450071 | 0.182892 | 2.460859 | 0.015592 | 0.069077 | 1 |
| ENSG0000 | mucosal h | Inflamed | ENO1-IT1  | sense_intr | chr1  | 8935847  | 8938066  | - | 744   | 3.46778  | 0.312649 | 0.408569 | 0.166046 | 2.46058  | 0.015603 | 0.069116 | 1 |
| ENSG0000 | mucosal h | Inflamed | HMGN3-A   | antisense  | chr6  | 79943435 | 79946514 | + | 2946  | 51.24344 | 0.00716  | 0.481825 | 0.195867 | 2.459958 | 0.015628 | 0.069211 | 1 |
| ENSG0000 | mucosal h | Inflamed | RBM20     | protein_cc | chr10 | 1.12E+08 | 1.13E+08 | + | 8162  | 24.29594 | 0.040573 | 0.596337 | 0.242421 | 2.459927 | 0.01563  | 0.069211 | 1 |
| ENSG0000 | mucosal h | Inflamed | ZNF812    | protein_cc | chr19 | 9800600  | 9811452  | - | 2192  | 4.558473 | 0.348449 | -0.5457  | 0.221865 | -2.4596  | 0.015643 | 0.069258 | 1 |
| ENSG0000 | mucosal h | Inflamed | SH3BP5    | protein_cc | chr3  | 15296360 | 15382875 | - | 4159  | 1274.26  | 0        | -0.56796 | 0.230946 | -2.45929 | 0.015656 | 0.069291 | 1 |
| ENSG0000 | mucosal h | Inflamed | CYP3A4    | protein_cc | chr7  | 99354604 | 99381888 | - | 3120  | 286.0382 | 0.090692 | 1.52242  | 0.61905  | 2.459284 | 0.015656 | 0.069291 | 1 |



|          |           |          |           |            |       |          |          |   |       |          |          |          |          |          |          |          |   |
|----------|-----------|----------|-----------|------------|-------|----------|----------|---|-------|----------|----------|----------|----------|----------|----------|----------|---|
| ENSG0000 | mucosal h | Inflamed | MTMR7     | protein_cc | chr8  | 17155539 | 17271037 | - | 5692  | 3.699284 | 0.26969  | 0.468231 | 0.190397 | 2.459229 | 0.015658 | 0.069291 | 1 |
| ENSG0000 | mucosal h | Inflamed | DLX6-AS1  | antisense  | chr7  | 96584453 | 96643377 | - | 16633 | 1.885442 | 0.706444 | 0.464915 | 0.189062 | 2.459058 | 0.015665 | 0.06931  | 1 |
| ENSG0000 | mucosal h | Inflamed | CRABP2    | protein_cc | chr1  | 1.57E+08 | 1.57E+08 | - | 1100  | 132.5131 | 0.004773 | -0.88537 | 0.36008  | -2.45883 | 0.015675 | 0.069333 | 1 |
| ENSG0000 | mucosal h | Inflamed | SUGT1P2   | pseudoger  | chr3  | 32794402 | 32795393 | + | 992   | 3.558473 | 0.27685  | 0.433953 | 0.17649  | 2.458804 | 0.015676 | 0.069333 | 1 |
| ENSG0000 | mucosal h | Inflamed | MAP3K13   | protein_cc | chr3  | 1.85E+08 | 1.85E+08 | + | 12623 | 1058.191 | 0        | 0.352311 | 0.143329 | 2.458051 | 0.015707 | 0.069455 | 1 |
| ENSG0000 | mucosal h | Inflamed | RNF207    | protein_cc | chr1  | 6265535  | 6281359  | + | 6585  | 715.2029 | 0        | 0.631583 | 0.25695  | 2.458003 | 0.015709 | 0.069455 | 1 |
| ENSG0000 | mucosal h | Inflamed | DNM2      | protein_cc | chr19 | 10828755 | 10944164 | + | 13443 | 23201.78 | 0        | 0.302162 | 0.122968 | 2.457243 | 0.01574  | 0.069582 | 1 |
| ENSG0000 | mucosal h | Inflamed | LRRC16A   | protein_cc | chr6  | 25279306 | 25620758 | + | 6881  | 2246.606 | 0        | 0.46374  | 0.188762 | 2.456748 | 0.01576  | 0.069661 | 1 |
| ENSG0000 | mucosal h | Inflamed | TRAV2     | TR_V_gene  | chr14 | 22180544 | 22181066 | + | 348   | 9.28401  | 0.126492 | -0.53074 | 0.21609  | -2.4561  | 0.015787 | 0.069767 | 1 |
| ENSG0000 | mucosal h | Inflamed | BEND3     | protein_cc | chr6  | 1.07E+08 | 1.07E+08 | - | 6839  | 479.2649 | 0        | 0.352543 | 0.143543 | 2.456011 | 0.015791 | 0.069772 | 1 |
| ENSG0000 | mucosal h | Inflamed | PDLIM2    | protein_cc | chr8  | 22435792 | 22455538 | + | 7671  | 1067.069 | 0        | 0.28675  | 0.116765 | 2.455784 | 0.0158   | 0.069801 | 1 |
| ENSG0000 | mucosal h | Inflamed | EPHA4     | protein_cc | chr2  | 2.22E+08 | 2.22E+08 | - | 7554  | 451.9523 | 0.002387 | 0.546202 | 0.222438 | 2.455525 | 0.015811 | 0.069837 | 1 |
| ENSG0000 | mucosal h | Inflamed | LSR       | protein_cc | chr19 | 35739233 | 35758867 | + | 2916  | 11609.37 | 0        | 0.446189 | 0.181726 | 2.45528  | 0.015821 | 0.069865 | 1 |
| ENSG0000 | mucosal h | Inflamed | YKT6      | protein_cc | chr7  | 44240567 | 44253893 | + | 3707  | 4735.854 | 0        | -0.13434 | 0.054716 | -2.45524 | 0.015823 | 0.069865 | 1 |
| ENSG0000 | mucosal h | Inflamed | RP11-320M | pseudoger  | chr14 | 32953304 | 32954006 | - | 703   | 5.472554 | 0.439141 | 0.519769 | 0.211711 | 2.455091 | 0.015829 | 0.069875 | 1 |
| ENSG0000 | mucosal h | Inflamed | CTD-2377I | lincRNA    | chr17 | 46810453 | 46811250 | + | 532   | 65.10263 | 0.453461 | 1.615526 | 0.658039 | 2.455061 | 0.01583  | 0.069875 | 1 |
| ENSG0000 | mucosal h | Inflamed | RP1-39G2  | antisense  | chr1  | 40722099 | 40723639 | - | 1541  | 119.2458 | 0        | 0.448083 | 0.182524 | 2.454933 | 0.015836 | 0.069887 | 1 |
| ENSG0000 | mucosal h | Inflamed | ID2       | protein_cc | chr2  | 8818975  | 8824583  | + | 2205  | 2400.406 | 0        | 0.336571 | 0.137121 | 2.454563 | 0.015851 | 0.069943 | 1 |
| ENSG0000 | mucosal h | Inflamed | RABL2A    | protein_cc | chr2  | 1.14E+08 | 1.14E+08 | + | 6008  | 311.5418 | 0.004773 | 0.502581 | 0.204807 | 2.453921 | 0.015877 | 0.07004  | 1 |
| ENSG0000 | mucosal h | Inflamed | RP11-179E | lincRNA    | chr10 | 60064313 | 60065381 | + | 328   | 1.045346 | 0.71599  | 0.300746 | 0.122558 | 2.453905 | 0.015878 | 0.07004  | 1 |
| ENSG0000 | mucosal h | Inflamed | KRT75     | protein_cc | chr12 | 52817854 | 52828309 | - | 2324  | 1.508353 | 0.763723 | -0.52648 | 0.214563 | -2.45371 | 0.015886 | 0.070063 | 1 |
| ENSG0000 | mucosal h | Inflamed | HCG9      | lincRNA    | chr6  | 29942889 | 29946183 | + | 696   | 2.625298 | 0.391408 | 0.383557 | 0.156329 | 2.453517 | 0.015894 | 0.07008  | 1 |
| ENSG0000 | mucosal h | Inflamed | CTSG      | protein_cc | chr14 | 25042728 | 25045466 | - | 1374  | 337.9761 | 0.002387 | -0.85757 | 0.349528 | -2.45349 | 0.015895 | 0.07008  | 1 |
| ENSG0000 | mucosal h | Inflamed | MRPL15    | protein_cc | chr8  | 55047770 | 55060461 | + | 1191  | 982.6134 | 0        | 0.28854  | 0.117607 | 2.453429 | 0.015898 | 0.07008  | 1 |
| ENSG0000 | mucosal h | Inflamed | C5AR2     | protein_cc | chr19 | 47835404 | 47846606 | + | 2826  | 133.1885 | 0.002387 | -0.68382 | 0.278755 | -2.45312 | 0.015911 | 0.070118 | 1 |
| ENSG0000 | mucosal h | Inflamed | CDK14     | protein_cc | chr7  | 90095738 | 90839905 | + | 6841  | 303.8377 | 0        | -0.69792 | 0.284507 | -2.45309 | 0.015912 | 0.070118 | 1 |
| ENSG0000 | mucosal h | Inflamed | RP11-950I | antisense  | chr18 | 34823739 | 34827179 | + | 411   | 3.486874 | 0.317422 | 0.449606 | 0.183288 | 2.453003 | 0.015916 | 0.070123 | 1 |
| ENSG0000 | mucosal h | Inflamed | RP11-527L | antisense  | chr17 | 41991801 | 42000369 | - | 832   | 1.484487 | 0.608592 | -0.32876 | 0.13403  | -2.45291 | 0.01592  | 0.070126 | 1 |
| ENSG0000 | mucosal h | Inflamed | CASZ1     | protein_cc | chr1  | 10696661 | 10856707 | - | 11336 | 2834.048 | 0        | 0.469434 | 0.191383 | 2.452855 | 0.015922 | 0.070126 | 1 |
| ENSG0000 | mucosal h | Inflamed | SERTAD4   | protein_cc | chr1  | 2.1E+08  | 2.1E+08  | + | 5467  | 222.4869 | 0        | 0.596331 | 0.243134 | 2.452688 | 0.015929 | 0.070145 | 1 |
| ENSG0000 | mucosal h | Inflamed | ABCA11P   | pseudoger  | chr4  | 419224   | 467918   | - | 2790  | 24.68258 | 0.02864  | 0.63973  | 0.260856 | 2.452426 | 0.01594  | 0.070182 | 1 |
| ENSG0000 | mucosal h | Inflamed | QPCT      | protein_cc | chr2  | 37571717 | 37600465 | + | 2599  | 348.2434 | 0        | -0.47128 | 0.192179 | -2.45232 | 0.015944 | 0.070187 | 1 |
| ENSG0000 | mucosal h | Inflamed | RP11-967K | antisense  | chr12 | 28316231 | 28343299 | - | 739   | 11.50835 | 0.026253 | 0.395324 | 0.161208 | 2.452268 | 0.015946 | 0.070187 | 1 |
| ENSG0000 | mucosal h | Inflamed | LINC0105C | lincRNA    | chr13 | 43384502 | 43386698 | - | 760   | 3.155131 | 0.622912 | -0.70502 | 0.287541 | -2.4519  | 0.015962 | 0.070244 | 1 |
| ENSG0000 | mucosal h | Inflamed | TRIM36    | protein_cc | chr5  | 1.14E+08 | 1.15E+08 | - | 6113  | 642.2936 | 0        | 0.702535 | 0.286547 | 2.45173  | 0.015969 | 0.070263 | 1 |
| ENSG0000 | mucosal h | Inflamed | RNF138    | protein_cc | chr18 | 29671818 | 29711524 | + | 3795  | 850.7613 | 0        | 0.446729 | 0.182223 | 2.451546 | 0.015976 | 0.070285 | 1 |
| ENSG0000 | mucosal h | Inflamed | FGD5-AS1  | antisense  | chr3  | 14961854 | 14989931 | - | 5131  | 4391.248 | 0        | 0.38779  | 0.158188 | 2.451455 | 0.01598  | 0.07029  | 1 |
| ENSG0000 | mucosal h | Inflamed | RP11-480A | lincRNA    | chr3  | 1.96E+08 | 1.96E+08 | - | 3508  | 117.0215 | 0.023866 | 0.745724 | 0.304219 | 2.451274 | 0.015988 | 0.070311 | 1 |
| ENSG0000 | mucosal h | Inflamed | AP000230  | lincRNA    | chr21 | 27543189 | 27589700 | + | 2044  | 4.167064 | 0.343675 | 0.398787 | 0.162696 | 2.451117 | 0.015994 | 0.070325 | 1 |
| ENSG0000 | mucosal h | Inflamed | GSDMD     | protein_cc | chr8  | 1.45E+08 | 1.45E+08 | + | 5116  | 4825.601 | 0        | -0.22756 | 0.09284  | -2.45107 | 0.015996 | 0.070325 | 1 |

|          |           |          |           |            |       |          |          |   |       |          |          |          |          |          |          |          |   |
|----------|-----------|----------|-----------|------------|-------|----------|----------|---|-------|----------|----------|----------|----------|----------|----------|----------|---|
| ENSG0000 | mucosal h | Inflamed | SH3GL1    | protein_cc | chr19 | 4360367  | 4400544  | - | 3685  | 3259.208 | 0        | -0.26596 | 0.108514 | -2.45088 | 0.016004 | 0.070348 | 1 |
| ENSG0000 | mucosal h | Inflamed | CTD-2583  | pseudoger  | chr19 | 58379253 | 58380202 | + | 936   | 244.1313 | 0        | 0.492394 | 0.200912 | 2.450793 | 0.016008 | 0.070353 | 1 |
| ENSG0000 | mucosal h | Inflamed | RP11-862L | antisense  | chr18 | 74686646 | 74696118 | + | 2478  | 7.587112 | 0.057279 | 0.41447  | 0.169124 | 2.450689 | 0.016012 | 0.07036  | 1 |
| ENSG0000 | mucosal h | Inflamed | CCDC149   | protein_cc | chr4  | 24807739 | 24981826 | - | 9584  | 691.6372 | 0        | 0.269034 | 0.109817 | 2.449841 | 0.016048 | 0.070504 | 1 |
| ENSG0000 | mucosal h | Inflamed | CCDC58    | protein_cc | chr3  | 1.22E+08 | 1.22E+08 | - | 1746  | 266.4057 | 0        | 0.362519 | 0.147987 | 2.449663 | 0.016055 | 0.070525 | 1 |
| ENSG0000 | mucosal h | Inflamed | RP11-930  | sense_intr | chr16 | 46694608 | 46695503 | - | 321   | 1.637232 | 0.572792 | 0.334093 | 0.136393 | 2.449487 | 0.016063 | 0.070537 | 1 |
| ENSG0000 | mucosal h | Inflamed | CTC-436P1 | lincRNA    | chr5  | 60497136 | 60560756 | - | 1036  | 12.93795 | 0.076372 | 0.58976  | 0.24077  | 2.449471 | 0.016063 | 0.070537 | 1 |
| ENSG0000 | mucosal h | Inflamed | CROCCP2   | lincRNA    | chr1  | 16944751 | 16971178 | - | 4534  | 1185.621 | 0        | 0.422732 | 0.172589 | 2.44936  | 0.016068 | 0.070546 | 1 |
| ENSG0000 | mucosal h | Inflamed | SORT1     | protein_cc | chr1  | 1.1E+08  | 1.1E+08  | - | 8760  | 6436.804 | 0        | 0.423941 | 0.173104 | 2.449055 | 0.016081 | 0.07059  | 1 |
| ENSG0000 | mucosal h | Inflamed | SLC4A5    | protein_cc | chr2  | 74443369 | 74570541 | - | 8009  | 22.66587 | 0.047733 | 0.555177 | 0.226716 | 2.448776 | 0.016093 | 0.070611 | 1 |
| ENSG0000 | mucosal h | Inflamed | SUDS3     | protein_cc | chr12 | 1.19E+08 | 1.19E+08 | + | 5758  | 2297.857 | 0        | 0.403857 | 0.164926 | 2.44872  | 0.016095 | 0.070611 | 1 |
| ENSG0000 | mucosal h | Inflamed | WEE1      | protein_cc | chr11 | 9595228  | 9615004  | + | 9239  | 872.5943 | 0        | 0.428866 | 0.17514  | 2.4487   | 0.016096 | 0.070611 | 1 |
| ENSG0000 | mucosal h | Inflamed | STK38L    | protein_cc | chr12 | 27396901 | 27478892 | + | 6921  | 1107.473 | 0        | 0.465393 | 0.190058 | 2.448688 | 0.016096 | 0.070611 | 1 |
| ENSG0000 | mucosal h | Inflamed | RPL7P3    | pseudoger  | chr20 | 61169878 | 61170591 | + | 714   | 0.937947 | 0.770883 | 0.303201 | 0.123827 | 2.448578 | 0.016101 | 0.07062  | 1 |
| ENSG0000 | mucosal h | Inflamed | PCDH12    | protein_cc | chr5  | 1.41E+08 | 1.41E+08 | - | 6818  | 463.6874 | 0        | -0.53722 | 0.219426 | -2.44829 | 0.016113 | 0.070655 | 1 |
| ENSG0000 | mucosal h | Inflamed | HECW2     | protein_cc | chr2  | 1.97E+08 | 1.97E+08 | - | 12692 | 186.5274 | 0.011933 | -0.68323 | 0.279069 | -2.44823 | 0.016115 | 0.070655 | 1 |
| ENSG0000 | mucosal h | Inflamed | RP11-326  | lincRNA    | chr11 | 327171   | 330122   | + | 1277  | 13.30788 | 0.138425 | -0.72643 | 0.296723 | -2.44819 | 0.016117 | 0.070655 | 1 |
| ENSG0000 | mucosal h | Inflamed | FAM159A   | protein_cc | chr1  | 53099016 | 53135355 | + | 2508  | 56.60143 | 0        | -0.66535 | 0.27186  | -2.44739 | 0.016151 | 0.070792 | 1 |
| ENSG0000 | mucosal h | Inflamed | IL12RB2   | protein_cc | chr1  | 67773047 | 67862583 | + | 4233  | 70.55131 | 0.011933 | -0.58792 | 0.240248 | -2.44715 | 0.016161 | 0.070816 | 1 |
| ENSG0000 | mucosal h | Inflamed | TDGF1     | protein_cc | chr3  | 46616045 | 46668033 | + | 5013  | 86.40811 | 0.002387 | 0.564956 | 0.230865 | 2.447131 | 0.016162 | 0.070816 | 1 |
| ENSG0000 | mucosal h | Inflamed | XYLT1     | protein_cc | chr16 | 17195626 | 17564738 | - | 11004 | 2303.272 | 0        | 0.365572 | 0.149454 | 2.446045 | 0.016208 | 0.071005 | 1 |
| ENSG0000 | mucosal h | Inflamed | SNORD117  | snoRNA     | chr6  | 31504151 | 31504226 | - | 76    | 1.594272 | 0.591885 | 0.333649 | 0.136416 | 2.445826 | 0.016217 | 0.071034 | 1 |
| ENSG0000 | mucosal h | Inflamed | AC132872  | pseudoger  | chr17 | 80206943 | 80209703 | + | 2759  | 7.422434 | 0.171838 | -0.5762  | 0.235611 | -2.44555 | 0.016229 | 0.071074 | 1 |
| ENSG0000 | mucosal h | Inflamed | PRDM4     | protein_cc | chr12 | 1.08E+08 | 1.08E+08 | - | 4777  | 1683.177 | 0        | 0.315912 | 0.129184 | 2.445442 | 0.016233 | 0.071082 | 1 |
| ENSG0000 | mucosal h | Inflamed | RP11-375  | lincRNA    | chr3  | 1.34E+08 | 1.34E+08 | - | 1946  | 2.071599 | 0.508353 | 0.369187 | 0.150976 | 2.44533  | 0.016238 | 0.071091 | 1 |
| ENSG0000 | mucosal h | Inflamed | TGOLN2    | protein_cc | chr2  | 85545147 | 85555548 | - | 7077  | 18689.54 | 0        | 0.410546 | 0.167901 | 2.445167 | 0.016245 | 0.071109 | 1 |
| ENSG0000 | mucosal h | Inflamed | GID8      | protein_cc | chr20 | 61569471 | 61576996 | + | 1791  | 1545.186 | 0        | 0.158604 | 0.064886 | 2.444325 | 0.016281 | 0.071254 | 1 |
| ENSG0000 | mucosal h | Inflamed | PDIA5     | protein_cc | chr3  | 1.23E+08 | 1.23E+08 | + | 4030  | 1562.704 | 0        | -0.21411 | 0.087609 | -2.44387 | 0.0163   | 0.071327 | 1 |
| ENSG0000 | mucosal h | Inflamed | RABAC1    | protein_cc | chr19 | 42460833 | 42463542 | - | 1999  | 2467.036 | 0        | -0.32256 | 0.132002 | -2.44358 | 0.016313 | 0.071365 | 1 |
| ENSG0000 | mucosal h | Inflamed | PRDM8     | protein_cc | chr4  | 81105033 | 81125483 | + | 4588  | 235.4153 | 0        | -0.59361 | 0.24293  | -2.44354 | 0.016314 | 0.071365 | 1 |
| ENSG0000 | mucosal h | Inflamed | LIX1L     | protein_cc | chr1  | 1.45E+08 | 1.46E+08 | + | 3979  | 926.5967 | 0        | -0.40185 | 0.164477 | -2.44319 | 0.016329 | 0.07141  | 1 |
| ENSG0000 | mucosal h | Inflamed | MPL       | protein_cc | chr1  | 43803478 | 43818443 | + | 2128  | 5.243437 | 0.136038 | 0.407627 | 0.166843 | 2.443168 | 0.01633  | 0.07141  | 1 |
| ENSG0000 | mucosal h | Inflamed | ZNF501    | protein_cc | chr3  | 44771088 | 44778575 | + | 3910  | 70.6253  | 0.002387 | 0.441191 | 0.180607 | 2.44282  | 0.016345 | 0.071448 | 1 |
| ENSG0000 | mucosal h | Inflamed | SURF6     | protein_cc | chr9  | 1.36E+08 | 1.36E+08 | - | 2684  | 1631.418 | 0        | 0.259365 | 0.106176 | 2.442775 | 0.016347 | 0.071448 | 1 |
| ENSG0000 | mucosal h | Inflamed | MIR4477B  | miRNA      | chr9  | 68415308 | 68415388 | + | 81    | 5.188544 | 0.22673  | -0.49337 | 0.201972 | -2.44277 | 0.016347 | 0.071448 | 1 |
| ENSG0000 | mucosal h | Inflamed | RP13-582  | antisense  | chr8  | 1.44E+08 | 1.44E+08 | - | 1405  | 78.01671 | 0        | 0.328026 | 0.134304 | 2.442417 | 0.016362 | 0.071502 | 1 |
| ENSG0000 | mucosal h | Inflamed | G6PC      | protein_cc | chr17 | 41052814 | 41065386 | + | 3296  | 39.03819 | 0.644391 | 0.717495 | 0.293795 | 2.442163 | 0.016373 | 0.071538 | 1 |
| ENSG0000 | mucosal h | Inflamed | RP11-791  | lincRNA    | chr2  | 10908001 | 10910184 | - | 393   | 10.25537 | 0.031026 | -0.43753 | 0.179182 | -2.44183 | 0.016387 | 0.071579 | 1 |
| ENSG0000 | mucosal h | Inflamed | RP11-798  | pseudoger  | chr5  | 1.79E+08 | 1.79E+08 | - | 290   | 19.35322 | 0.01432  | -0.45793 | 0.187537 | -2.44181 | 0.016388 | 0.071579 | 1 |
| ENSG0000 | mucosal h | Inflamed | C14orf183 | protein_cc | chr14 | 50550369 | 50559361 | - | 975   | 3.680191 | 0.264916 | 0.444389 | 0.182022 | 2.441399 | 0.016406 | 0.071645 | 1 |

|          |           |          |           |            |       |          |          |   |       |          |          |          |          |          |          |          |   |
|----------|-----------|----------|-----------|------------|-------|----------|----------|---|-------|----------|----------|----------|----------|----------|----------|----------|---|
| ENSG0000 | mucosal h | Inflamed | RP11-582J | antisense  | chr8  | 22471421 | 22474170 | - | 2750  | 165.1957 | 0.011933 | 0.510459 | 0.209093 | 2.441301 | 0.01641  | 0.071651 | 1 |
| ENSG0000 | mucosal h | Inflamed | RP11-536C | antisense  | chr1  | 1.6E+08  | 1.6E+08  | + | 645   | 1.921241 | 0.632458 | 0.295709 | 0.121134 | 2.441167 | 0.016415 | 0.071664 | 1 |
| ENSG0000 | mucosal h | Inflamed | MTA3      | protein_cc | chr2  | 42721709 | 42984087 | + | 10580 | 1066.236 | 0        | 0.301282 | 0.123468 | 2.440163 | 0.016459 | 0.07184  | 1 |
| ENSG0000 | mucosal h | Inflamed | AC138783  | pseudoger  | chr7  | 74702428 | 74714647 | - | 1209  | 5.224344 | 0.24821  | 0.398205 | 0.163199 | 2.439999 | 0.016466 | 0.071855 | 1 |
| ENSG0000 | mucosal h | Inflamed | RP11-158M | antisense  | chr15 | 86293567 | 86296132 | - | 494   | 4.157518 | 0.252983 | 0.423362 | 0.173512 | 2.439955 | 0.016467 | 0.071855 | 1 |
| ENSG0000 | mucosal h | Inflamed | RN7SK     | misc_RNA   | chr6  | 52860418 | 52860748 | + | 331   | 72.59189 | 0        | 0.656539 | 0.269121 | 2.439566 | 0.016484 | 0.071916 | 1 |
| ENSG0000 | mucosal h | Inflamed | CXCR5     | protein_cc | chr11 | 1.19E+08 | 1.19E+08 | + | 4431  | 478.8067 | 0.002387 | -1.04039 | 0.426551 | -2.43906 | 0.016506 | 0.071999 | 1 |
| ENSG0000 | mucosal h | Inflamed | HADHB     | protein_cc | chr2  | 26466038 | 26513336 | + | 4133  | 4350.458 | 0        | 0.349824 | 0.143434 | 2.438925 | 0.016512 | 0.072001 | 1 |
| ENSG0000 | mucosal h | Inflamed | SLC16A4   | protein_cc | chr1  | 1.11E+08 | 1.11E+08 | - | 3167  | 152.9045 | 0.002387 | -0.67386 | 0.276302 | -2.43887 | 0.016514 | 0.072001 | 1 |
| ENSG0000 | mucosal h | Inflamed | RP11-397E | pseudoger  | chr4  | 87834419 | 87835970 | - | 1110  | 15.54893 | 0.02148  | 0.476785 | 0.195495 | 2.438861 | 0.016514 | 0.072001 | 1 |
| ENSG0000 | mucosal h | Inflamed | AC098614  | pseudoger  | chr3  | 27674467 | 27675211 | + | 745   | 38.10979 | 0.002387 | -0.33613 | 0.137828 | -2.4388  | 0.016517 | 0.072001 | 1 |
| ENSG0000 | mucosal h | Inflamed | HIST1H3H  | protein_cc | chr6  | 27777842 | 27778314 | + | 473   | 38.63007 | 0.004773 | 0.47201  | 0.193553 | 2.438668 | 0.016523 | 0.072013 | 1 |
| ENSG0000 | mucosal h | Inflamed | CREB5     | protein_cc | chr7  | 28338940 | 28865511 | + | 11674 | 203.4129 | 0.002387 | -0.79708 | 0.326887 | -2.43839 | 0.016535 | 0.072053 | 1 |
| ENSG0000 | mucosal h | Inflamed | LRP4      | protein_cc | chr11 | 46878419 | 46940193 | - | 8597  | 2674.031 | 0        | 0.68875  | 0.282514 | 2.437936 | 0.016554 | 0.072127 | 1 |
| ENSG0000 | mucosal h | Inflamed | ZNF471    | protein_cc | chr19 | 57019212 | 57041590 | + | 6783  | 97.179   | 0.004773 | 0.597855 | 0.245243 | 2.43781  | 0.01656  | 0.072139 | 1 |
| ENSG0000 | mucosal h | Inflamed | CTD-2620I | lincRNA    | chr19 | 53510765 | 53516433 | + | 4060  | 0.904535 | 0.789976 | -0.32281 | 0.132423 | -2.43773 | 0.016563 | 0.072141 | 1 |
| ENSG0000 | mucosal h | Inflamed | SLC35A3   | protein_cc | chr1  | 1E+08    | 1E+08    | + | 6241  | 3257.64  | 0        | 0.628587 | 0.257873 | 2.437586 | 0.016569 | 0.072157 | 1 |
| ENSG0000 | mucosal h | Inflamed | AF228730. | pseudoger  | chr8  | 7001154  | 7001363  | - | 210   | 1.720764 | 0.622912 | 0.42167  | 0.172995 | 2.43747  | 0.016574 | 0.072166 | 1 |
| ENSG0000 | mucosal h | Inflamed | TRPM2     | protein_cc | chr21 | 45770046 | 45862964 | + | 6705  | 743.1957 | 0        | -0.35217 | 0.144546 | -2.4364  | 0.016621 | 0.072354 | 1 |
| ENSG0000 | mucosal h | Inflamed | RP11-355E | antisense  | chr2  | 61698323 | 61711265 | + | 1963  | 71.97613 | 0        | 0.314877 | 0.129242 | 2.436345 | 0.016623 | 0.072354 | 1 |
| ENSG0000 | mucosal h | Inflamed | ZSWIM4    | protein_cc | chr19 | 13906274 | 13943044 | + | 4713  | 567.2315 | 0        | -0.56024 | 0.229993 | -2.43587 | 0.016643 | 0.072421 | 1 |
| ENSG0000 | mucosal h | Inflamed | SLC43A2   | protein_cc | chr17 | 1472561  | 1532180  | - | 10618 | 2608.155 | 0        | -0.46465 | 0.190755 | -2.43587 | 0.016644 | 0.072421 | 1 |
| ENSG0000 | mucosal h | Inflamed | NPW       | protein_cc | chr16 | 2059927  | 2070756  | + | 1193  | 20.87351 | 0.004773 | 0.475167 | 0.19508  | 2.435748 | 0.016649 | 0.072431 | 1 |
| ENSG0000 | mucosal h | Inflamed | RP11-817C | lincRNA    | chr15 | 75647551 | 75648087 | - | 343   | 16.59427 | 0.042959 | 0.530616 | 0.217865 | 2.435529 | 0.016658 | 0.07246  | 1 |
| ENSG0000 | mucosal h | Inflamed | GPR3      | protein_cc | chr1  | 27719148 | 27722318 | + | 2115  | 15.92124 | 0.078759 | -0.62956 | 0.258507 | -2.43535 | 0.016666 | 0.072482 | 1 |
| ENSG0000 | mucosal h | Inflamed | SFI1      | protein_cc | chr22 | 31884674 | 32014572 | + | 12038 | 1365.764 | 0        | 0.333164 | 0.13683  | 2.434882 | 0.016687 | 0.072559 | 1 |
| ENSG0000 | mucosal h | Inflamed | LL22NC03- | sense_intr | chr22 | 16154073 | 16154766 | - | 694   | 2.264916 | 0.572792 | -0.42414 | 0.174223 | -2.43446 | 0.016705 | 0.072615 | 1 |
| ENSG0000 | mucosal h | Inflamed | CTPS2     | protein_cc | chrX  | 16606126 | 16731059 | - | 5510  | 654.5203 | 0        | 0.373587 | 0.153458 | 2.434454 | 0.016705 | 0.072615 | 1 |
| ENSG0000 | mucosal h | Inflamed | PVR       | protein_cc | chr19 | 45147098 | 45166850 | + | 3519  | 2026.158 | 0        | 0.305567 | 0.125523 | 2.434362 | 0.016709 | 0.072618 | 1 |
| ENSG0000 | mucosal h | Inflamed | RP5-1068E | lincRNA    | chr1  | 2.3E+08  | 2.3E+08  | - | 478   | 5.350835 | 0.100239 | 0.402703 | 0.165427 | 2.434315 | 0.016711 | 0.072618 | 1 |
| ENSG0000 | mucosal h | Inflamed | RP11-28B2 | pseudoger  | chr17 | 18889461 | 18889647 | - | 187   | 0.797136 | 0.782816 | 0.251963 | 0.103521 | 2.433938 | 0.016728 | 0.072668 | 1 |
| ENSG0000 | mucosal h | Inflamed | UBAC2     | protein_cc | chr13 | 99853028 | 1E+08    | + | 4519  | 2418.136 | 0        | 0.164084 | 0.067415 | 2.433921 | 0.016728 | 0.072668 | 1 |
| ENSG0000 | mucosal h | Inflamed | CALU      | protein_cc | chr7  | 1.28E+08 | 1.28E+08 | + | 4537  | 4321.033 | 0        | -0.46173 | 0.189727 | -2.43363 | 0.016741 | 0.072711 | 1 |
| ENSG0000 | mucosal h | Inflamed | PITPNM1   | protein_cc | chr11 | 67259239 | 67273734 | - | 6449  | 6521.141 | 0        | -0.26395 | 0.108462 | -2.43353 | 0.016746 | 0.072719 | 1 |
| ENSG0000 | mucosal h | Inflamed | CTD-2089I | lincRNA    | chr5  | 50261521 | 50262842 | - | 569   | 3.742243 | 0.427208 | 0.604843 | 0.248585 | 2.433147 | 0.016762 | 0.072779 | 1 |
| ENSG0000 | mucosal h | Inflamed | TOX3      | protein_cc | chr16 | 52471917 | 52581714 | - | 5031  | 1196.484 | 0        | 0.598012 | 0.245824 | 2.432683 | 0.016782 | 0.072845 | 1 |
| ENSG0000 | mucosal h | Inflamed | RP5-8900: | sense_intr | chr1  | 1252961  | 1254069  | - | 386   | 73.02864 | 0.040573 | 0.631275 | 0.259499 | 2.432668 | 0.016783 | 0.072845 | 1 |
| ENSG0000 | mucosal h | Inflamed | HLA-U     | pseudoger  | chr6  | 29901878 | 29902063 | + | 186   | 11.05251 | 0.25537  | 0.562314 | 0.23116  | 2.432579 | 0.016787 | 0.07285  | 1 |
| ENSG0000 | mucosal h | Inflamed | TM6SF1    | protein_cc | chr15 | 83776159 | 83813606 | + | 2674  | 102.9952 | 0.002387 | -0.44431 | 0.182735 | -2.43147 | 0.016836 | 0.073049 | 1 |
| ENSG0000 | mucosal h | Inflamed | RPL21P7   | pseudoger  | chr14 | 65733356 | 65734408 | - | 483   | 4.840095 | 0.21957  | -0.41689 | 0.171468 | -2.4313  | 0.016843 | 0.073068 | 1 |

|          |           |          |            |                  |          |          |   |       |          |          |          |          |          |          |          |   |
|----------|-----------|----------|------------|------------------|----------|----------|---|-------|----------|----------|----------|----------|----------|----------|----------|---|
| ENSG0000 | mucosal h | Inflamed | MRPS5      | protein_cc chr2  | 95752952 | 95815179 | - | 6719  | 1468.976 | 0        | 0.207115 | 0.085191 | 2.431176 | 0.016848 | 0.07308  | 1 |
| ENSG0000 | mucosal h | Inflamed | PRDM15     | protein_cc chr21 | 43218385 | 43299591 | - | 13004 | 814.6038 | 0        | -0.39113 | 0.160884 | -2.43111 | 0.016851 | 0.073081 | 1 |
| ENSG0000 | mucosal h | Inflamed | HSCB       | protein_cc chr22 | 29138019 | 29153503 | + | 1462  | 204.4057 | 0        | -0.27    | 0.11107  | -2.43094 | 0.016859 | 0.073102 | 1 |
| ENSG0000 | mucosal h | Inflamed | MCCC1      | protein_cc chr3  | 1.83E+08 | 1.83E+08 | - | 4321  | 766.4845 | 0        | 0.323457 | 0.133098 | 2.430216 | 0.01689  | 0.073227 | 1 |
| ENSG0000 | mucosal h | Inflamed | PLA2G6     | protein_cc chr22 | 38507502 | 38601697 | - | 6758  | 746.0382 | 0        | 0.33894  | 0.139484 | 2.42996  | 0.016902 | 0.073263 | 1 |
| ENSG0000 | mucosal h | Inflamed | RP1-122P2  | lincRNA chr20    | 19738352 | 19790319 | + | 1089  | 39.22912 | 0.002387 | 0.332511 | 0.136843 | 2.429874 | 0.016905 | 0.073268 | 1 |
| ENSG0000 | mucosal h | Inflamed | SMN1       | protein_cc chr5  | 70220768 | 70249769 | + | 3186  | 118.3055 | 0        | 0.284961 | 0.117286 | 2.429623 | 0.016916 | 0.073303 | 1 |
| ENSG0000 | mucosal h | Inflamed | AC104667   | protein_cc chr2  | 2.38E+08 | 2.39E+08 | + | 1656  | 9.002387 | 0.078759 | 0.441886 | 0.181906 | 2.429197 | 0.016935 | 0.073361 | 1 |
| ENSG0000 | mucosal h | Inflamed | NUBPL      | protein_cc chr14 | 31959162 | 32330430 | + | 7593  | 262.4558 | 0        | 0.459928 | 0.189334 | 2.429192 | 0.016935 | 0.073361 | 1 |
| ENSG0000 | mucosal h | Inflamed | MYO15A     | protein_cc chr17 | 18012020 | 18083116 | + | 19117 | 34.86635 | 0.00716  | 0.400652 | 0.164942 | 2.429053 | 0.016941 | 0.073376 | 1 |
| ENSG0000 | mucosal h | Inflamed | ACOT2      | protein_cc chr14 | 74034324 | 74042357 | + | 2388  | 485.1265 | 0        | 0.239999 | 0.098817 | 2.428731 | 0.016956 | 0.073425 | 1 |
| ENSG0000 | mucosal h | Inflamed | RP11-295k  | protein_cc chr11 | 1768897  | 1780281  | - | 1136  | 3.369928 | 0.293556 | 0.431607 | 0.177717 | 2.428625 | 0.01696  | 0.073433 | 1 |
| ENSG0000 | mucosal h | Inflamed | PIP5KL1    | protein_cc chr9  | 1.31E+08 | 1.31E+08 | - | 3341  | 20.29356 | 0.009547 | -0.40167 | 0.165401 | -2.42844 | 0.016968 | 0.073456 | 1 |
| ENSG0000 | mucosal h | Inflamed | RP11-6I2.3 | lincRNA chr8     | 74964575 | 75012088 | + | 738   | 2.451074 | 0.470167 | -0.45443 | 0.187198 | -2.42756 | 0.017007 | 0.073595 | 1 |
| ENSG0000 | mucosal h | Inflamed | SHC1       | protein_cc chr1  | 1.55E+08 | 1.55E+08 | - | 4342  | 6822.017 | 0        | -0.23928 | 0.098572 | -2.4275  | 0.01701  | 0.073595 | 1 |
| ENSG0000 | mucosal h | Inflamed | CTC-444N   | antisense chr19  | 57778588 | 57791702 | - | 738   | 16.47255 | 0.031026 | 0.470841 | 0.193963 | 2.427472 | 0.017011 | 0.073595 | 1 |
| ENSG0000 | mucosal h | Inflamed | COX15      | protein_cc chr10 | 1.01E+08 | 1.01E+08 | - | 4177  | 1508.525 | 0        | 0.277309 | 0.114238 | 2.427462 | 0.017012 | 0.073595 | 1 |
| ENSG0000 | mucosal h | Inflamed | ALDH7A1P   | pseudoger chr5   | 76586093 | 76587625 | + | 1533  | 3.069212 | 0.28401  | 0.327991 | 0.135123 | 2.427359 | 0.017016 | 0.073602 | 1 |
| ENSG0000 | mucosal h | Inflamed | RP11-577f  | pseudoger chr7   | 1.02E+08 | 1.02E+08 | + | 794   | 5.338902 | 0.136038 | 0.41117  | 0.169404 | 2.42715  | 0.017025 | 0.07362  | 1 |
| ENSG0000 | mucosal h | Inflamed | KB-1507C   | sense_intr chr8  | 1.04E+08 | 1.04E+08 | + | 533   | 1.704057 | 0.527446 | 0.335843 | 0.13837  | 2.427142 | 0.017026 | 0.07362  | 1 |
| ENSG0000 | mucosal h | Inflamed | ZNF701     | protein_cc chr19 | 53059075 | 53090427 | + | 6294  | 284.8091 | 0        | 0.52448  | 0.2161   | 2.427019 | 0.017031 | 0.073631 | 1 |
| ENSG0000 | mucosal h | Inflamed | PLA2G4C    | protein_cc chr19 | 48551100 | 48614074 | - | 6613  | 287.6921 | 0        | -0.4162  | 0.171521 | -2.42653 | 0.017053 | 0.073702 | 1 |
| ENSG0000 | mucosal h | Inflamed | AC135178   | protein_cc chr17 | 8261731  | 8263538  | - | 1808  | 61.1432  | 0.01432  | 0.61996  | 0.255493 | 2.42652  | 0.017053 | 0.073702 | 1 |
| ENSG0000 | mucosal h | Inflamed | RP11-432l  | antisense chr16  | 71657611 | 71660719 | - | 465   | 9.522673 | 0.100239 | 0.503056 | 0.20736  | 2.426003 | 0.017076 | 0.073789 | 1 |
| ENSG0000 | mucosal h | Inflamed | SERPINA1C  | protein_cc chr14 | 94749650 | 94759608 | - | 2614  | 5.443914 | 0.257757 | 0.512771 | 0.211387 | 2.425743 | 0.017088 | 0.073827 | 1 |
| ENSG0000 | mucosal h | Inflamed | C7orf43    | protein_cc chr7  | 99752043 | 99756338 | - | 3255  | 1771.229 | 0        | 0.258638 | 0.10666  | 2.424893 | 0.017126 | 0.073978 | 1 |
| ENSG0000 | mucosal h | Inflamed | RP11-888l  | lincRNA chr18    | 9315192  | 9334439  | - | 466   | 6.310263 | 0.138425 | -0.43329 | 0.178697 | -2.42473 | 0.017133 | 0.073997 | 1 |
| ENSG0000 | mucosal h | Inflamed | ARX        | protein_cc chrX  | 25021811 | 25034065 | - | 2876  | 40       | 0.01432  | 0.615587 | 0.253898 | 2.424548 | 0.017141 | 0.074009 | 1 |
| ENSG0000 | mucosal h | Inflamed | CTA-445C   | lincRNA chr22    | 26917949 | 26921002 | - | 3054  | 195.3842 | 0        | -0.43185 | 0.178115 | -2.42454 | 0.017141 | 0.074009 | 1 |
| ENSG0000 | mucosal h | Inflamed | SLC25A15f  | pseudoger chr13  | 25517713 | 25518636 | + | 290   | 2.097852 | 0.696897 | 0.324162 | 0.133708 | 2.424398 | 0.017148 | 0.074024 | 1 |
| ENSG0000 | mucosal h | Inflamed | AARSD1     | protein_cc chr17 | 41102543 | 41116515 | - | 3704  | 138.9881 | 0        | 0.42511  | 0.175381 | 2.423924 | 0.017169 | 0.074092 | 1 |
| ENSG0000 | mucosal h | Inflamed | CAAP1      | protein_cc chr9  | 26840683 | 26892802 | - | 3014  | 776.9045 | 0        | 0.39627  | 0.163488 | 2.42385  | 0.017172 | 0.074092 | 1 |
| ENSG0000 | mucosal h | Inflamed | GRIK4      | protein_cc chr11 | 1.2E+08  | 1.21E+08 | + | 7421  | 31.81623 | 0.011933 | -0.53566 | 0.220997 | -2.42382 | 0.017173 | 0.074092 | 1 |
| ENSG0000 | mucosal h | Inflamed | CYTH3      | protein_cc chr7  | 6201407  | 6312275  | - | 5805  | 1366.702 | 0        | 0.325427 | 0.134267 | 2.423738 | 0.017177 | 0.074092 | 1 |
| ENSG0000 | mucosal h | Inflamed | RASL12     | protein_cc chr15 | 65345679 | 65369028 | - | 2798  | 598.0955 | 0        | -0.45221 | 0.186578 | -2.42369 | 0.017179 | 0.074092 | 1 |
| ENSG0000 | mucosal h | Inflamed | RP11-519C  | antisense chr15  | 45740625 | 45805965 | + | 3886  | 122.4129 | 0.004773 | 0.545484 | 0.225066 | 2.423665 | 0.01718  | 0.074092 | 1 |
| ENSG0000 | mucosal h | Inflamed | BCS1L      | protein_cc chr2  | 2.2E+08  | 2.2E+08  | + | 3379  | 776.685  | 0        | 0.239783 | 0.098958 | 2.42308  | 0.017206 | 0.074189 | 1 |
| ENSG0000 | mucosal h | Inflamed | AC007228   | lincRNA chr19    | 57183942 | 57185269 | - | 1328  | 44.68258 | 0.011933 | 0.291311 | 0.120225 | 2.423038 | 0.017208 | 0.074189 | 1 |
| ENSG0000 | mucosal h | Inflamed | PLCL2      | protein_cc chr3  | 16844159 | 17132086 | + | 5152  | 724.4057 | 0        | 0.406677 | 0.167862 | 2.422682 | 0.017224 | 0.074234 | 1 |
| ENSG0000 | mucosal h | Inflamed | RN7SKP11   | misc_RNA chr6    | 47683019 | 47683337 | + | 319   | 1.813842 | 0.579952 | 0.413915 | 0.170851 | 2.422675 | 0.017224 | 0.074234 | 1 |

|          |           |          |           |              |       |          |          |   |       |          |          |          |          |          |          |          |   |
|----------|-----------|----------|-----------|--------------|-------|----------|----------|---|-------|----------|----------|----------|----------|----------|----------|----------|---|
| ENSG0000 | mucosal h | Inflamed | HCG14     | antisense    | chr6  | 28864307 | 28865099 | + | 413   | 0.842482 | 0.785203 | 0.27002  | 0.11146  | 2.422573 | 0.017229 | 0.074242 | 1 |
| ENSG0000 | mucosal h | Inflamed | BAIAP2L2  | protein_cc   | chr22 | 38480896 | 38506677 | - | 2194  | 3010.177 | 0        | 0.557773 | 0.230288 | 2.422066 | 0.017252 | 0.074327 | 1 |
| ENSG0000 | mucosal h | Inflamed | CCDC153   | protein_cc   | chr11 | 1.19E+08 | 1.19E+08 | - | 2556  | 46.19809 | 0        | 0.297958 | 0.123034 | 2.421758 | 0.017265 | 0.074374 | 1 |
| ENSG0000 | mucosal h | Inflamed | USP3-AS1  | antisense    | chr15 | 63836446 | 63893788 | - | 3581  | 27.24105 | 0        | 0.43855  | 0.181106 | 2.421508 | 0.017277 | 0.07441  | 1 |
| ENSG0000 | mucosal h | Inflamed | OASL      | protein_cc   | chr12 | 1.21E+08 | 1.21E+08 | - | 2336  | 1165.341 | 0        | -0.48408 | 0.199917 | -2.42141 | 0.017281 | 0.074417 | 1 |
| ENSG0000 | mucosal h | Inflamed | CS        | protein_cc   | chr12 | 56665483 | 56694176 | - | 6402  | 9961.675 | 0        | 0.27343  | 0.112935 | 2.421129 | 0.017294 | 0.074459 | 1 |
| ENSG0000 | mucosal h | Inflamed | RP11-335L | lincRNA      | chr4  | 1.84E+08 | 1.84E+08 | - | 634   | 0.966587 | 0.732697 | 0.280506 | 0.115873 | 2.420799 | 0.017308 | 0.074492 | 1 |
| ENSG0000 | mucosal h | Inflamed | STT3A     | protein_cc   | chr11 | 1.25E+08 | 1.25E+08 | + | 7345  | 5767.124 | 0        | -0.35971 | 0.148591 | -2.42079 | 0.017309 | 0.074492 | 1 |
| ENSG0000 | mucosal h | Inflamed | TGFB3     | protein_cc   | chr14 | 76424442 | 76449334 | - | 4914  | 514.864  | 0        | -0.66555 | 0.274933 | -2.42077 | 0.01731  | 0.074492 | 1 |
| ENSG0000 | mucosal h | Inflamed | MGARP     | protein_cc   | chr4  | 1.4E+08  | 1.4E+08  | - | 1339  | 2.51074  | 0.381862 | 0.361885 | 0.149501 | 2.420629 | 0.017316 | 0.074507 | 1 |
| ENSG0000 | mucosal h | Inflamed | CALCOCO2  | protein_cc   | chr17 | 46908350 | 46943884 | + | 8333  | 4069.527 | 0        | 0.343931 | 0.142098 | 2.420385 | 0.017327 | 0.074542 | 1 |
| ENSG0000 | mucosal h | Inflamed | GOLIM4    | protein_cc   | chr3  | 1.68E+08 | 1.68E+08 | - | 4647  | 4049.654 | 0        | 0.534534 | 0.22089  | 2.419914 | 0.017348 | 0.074609 | 1 |
| ENSG0000 | mucosal h | Inflamed | TTY14     | lincRNA      | chrY  | 21034387 | 21239302 | - | 3140  | 51.27208 | 0.408115 | 0.327796 | 0.135458 | 2.419912 | 0.017348 | 0.074609 | 1 |
| ENSG0000 | mucosal h | Inflamed | AC007381  | lincRNA      | chr2  | 60577730 | 60580151 | - | 2005  | 2.424821 | 0.589499 | -0.43814 | 0.18107  | -2.41974 | 0.017356 | 0.074631 | 1 |
| ENSG0000 | mucosal h | Inflamed | UQCRC2    | protein_cc   | chr16 | 21963981 | 21994981 | + | 4992  | 6792.983 | 0        | 0.375931 | 0.155377 | 2.419471 | 0.017368 | 0.07467  | 1 |
| ENSG0000 | mucosal h | Inflamed | PLD1      | protein_cc   | chr3  | 1.71E+08 | 1.72E+08 | - | 9953  | 1715.186 | 0        | 0.451127 | 0.186525 | 2.418586 | 0.017408 | 0.074829 | 1 |
| ENSG0000 | mucosal h | Inflamed | RP11-498E | sense_intr   | chr9  | 1.25E+08 | 1.25E+08 | + | 221   | 11.42243 | 0.057279 | -0.45712 | 0.189027 | -2.41827 | 0.017422 | 0.074878 | 1 |
| ENSG0000 | mucosal h | Inflamed | RNASE4    | protein_cc   | chr14 | 21152259 | 21168761 | + | 2104  | 3.460621 | 0.257757 | 0.375902 | 0.155453 | 2.418108 | 0.01743  | 0.074897 | 1 |
| ENSG0000 | mucosal h | Inflamed | LINC00322 | lincRNA      | chr21 | 44742297 | 44751919 | - | 699   | 0.849642 | 0.782816 | -0.34827 | 0.144036 | -2.41793 | 0.017438 | 0.074909 | 1 |
| ENSG0000 | mucosal h | Inflamed | AFAP1L1   | protein_cc   | chr5  | 1.49E+08 | 1.49E+08 | + | 4721  | 350.3031 | 0        | -0.51294 | 0.21214  | -2.41792 | 0.017438 | 0.074909 | 1 |
| ENSG0000 | mucosal h | Inflamed | P2RX1     | protein_cc   | chr17 | 3799886  | 3819794  | - | 3970  | 737.7136 | 0        | -0.5342  | 0.220956 | -2.41768 | 0.017449 | 0.074943 | 1 |
| ENSG0000 | mucosal h | Inflamed | ANKRD26F  | pseudoger    | chr16 | 46503253 | 46603009 | - | 6411  | 1.675418 | 0.701671 | -0.51797 | 0.214264 | -2.41746 | 0.017459 | 0.074975 | 1 |
| ENSG0000 | mucosal h | Inflamed | RP11-488C | pseudoger    | chr14 | 77352720 | 77353093 | - | 374   | 6.470167 | 0.088305 | 0.408675 | 0.169077 | 2.417099 | 0.017475 | 0.075032 | 1 |
| ENSG0000 | mucosal h | Inflamed | RP11-378J | antisense    | chr1  | 2.23E+08 | 2.23E+08 | - | 2646  | 11.26253 | 0.085919 | -0.53647 | 0.221974 | -2.41681 | 0.017488 | 0.075076 | 1 |
| ENSG0000 | mucosal h | Inflamed | ARHGEF38  | protein_cc   | chr4  | 1.06E+08 | 1.07E+08 | + | 7579  | 276.5465 | 0.004773 | 0.738811 | 0.305721 | 2.416614 | 0.017497 | 0.07509  | 1 |
| ENSG0000 | mucosal h | Inflamed | RP13-122E | sense_ove    | chr9  | 1.4E+08  | 1.4E+08  | - | 1854  | 106.4344 | 0        | 0.403042 | 0.16678  | 2.416612 | 0.017497 | 0.07509  | 1 |
| ENSG0000 | mucosal h | Inflamed | RP11-229F | processed_ch | chr9  | 1.4E+08  | 1.4E+08  | + | 686   | 3.095465 | 0.470167 | -0.50001 | 0.206912 | -2.41652 | 0.017501 | 0.07509  | 1 |
| ENSG0000 | mucosal h | Inflamed | CRYZL1    | protein_cc   | chr21 | 34961647 | 35016232 | - | 6177  | 442.5776 | 0        | 0.420945 | 0.174197 | 2.416485 | 0.017503 | 0.07509  | 1 |
| ENSG0000 | mucosal h | Inflamed | RN7SL800I | misc_RNA     | chr17 | 60083100 | 60083348 | - | 249   | 1.680191 | 0.556086 | 0.322232 | 0.133364 | 2.41618  | 0.017517 | 0.075137 | 1 |
| ENSG0000 | mucosal h | Inflamed | RP11-983F | antisense    | chr12 | 53408380 | 53448222 | - | 4990  | 145.5847 | 0        | 0.366576 | 0.151726 | 2.416043 | 0.017523 | 0.075152 | 1 |
| ENSG0000 | mucosal h | Inflamed | SATB1     | protein_cc   | chr3  | 18386879 | 18487080 | - | 13405 | 1506.136 | 0        | 0.456608 | 0.188999 | 2.415934 | 0.017528 | 0.075161 | 1 |
| ENSG0000 | mucosal h | Inflamed | MIER3     | protein_cc   | chr5  | 56215429 | 56267502 | - | 5763  | 2505.458 | 0        | 0.783712 | 0.324521 | 2.414985 | 0.017571 | 0.07532  | 1 |
| ENSG0000 | mucosal h | Inflamed | RP3-395M  | antisense    | chr1  | 2512999  | 2515972  | + | 626   | 86.15274 | 0        | 0.364854 | 0.151081 | 2.414951 | 0.017573 | 0.07532  | 1 |
| ENSG0000 | mucosal h | Inflamed | RP11-576I | lincRNA      | chr1  | 2.05E+08 | 2.05E+08 | + | 2885  | 1.183771 | 0.711217 | -0.33002 | 0.13666  | -2.41489 | 0.017575 | 0.07532  | 1 |
| ENSG0000 | mucosal h | Inflamed | CD164     | protein_cc   | chr6  | 1.1E+08  | 1.1E+08  | - | 6944  | 14310.18 | 0        | 0.442524 | 0.18325  | 2.414864 | 0.017577 | 0.07532  | 1 |
| ENSG0000 | mucosal h | Inflamed | SUOX      | protein_cc   | chr12 | 56390964 | 56400425 | + | 5008  | 1086.804 | 0        | 0.254997 | 0.105608 | 2.41456  | 0.01759  | 0.075367 | 1 |
| ENSG0000 | mucosal h | Inflamed | LINC0093E | lincRNA      | chr12 | 46119510 | 46121558 | - | 2049  | 342.926  | 0        | 0.342169 | 0.141719 | 2.414418 | 0.017597 | 0.075382 | 1 |
| ENSG0000 | mucosal h | Inflamed | RP11-420A | lincRNA      | chr4  | 1.29E+08 | 1.29E+08 | + | 3283  | 31.4821  | 0.02148  | 0.658693 | 0.272854 | 2.414083 | 0.017612 | 0.075435 | 1 |
| ENSG0000 | mucosal h | Inflamed | STK38     | protein_cc   | chr6  | 36461669 | 36515247 | - | 3576  | 3814.532 | 0        | 0.381402 | 0.157996 | 2.414007 | 0.017616 | 0.075438 | 1 |
| ENSG0000 | mucosal h | Inflamed | C6orf106  | protein_cc   | chr6  | 34555065 | 34664636 | - | 4551  | 6725.661 | 0        | -0.1819  | 0.075361 | -2.41376 | 0.017627 | 0.075474 | 1 |

|          |           |          |           |            |       |          |          |   |       |          |          |          |          |          |          |          |   |
|----------|-----------|----------|-----------|------------|-------|----------|----------|---|-------|----------|----------|----------|----------|----------|----------|----------|---|
| ENSG0000 | mucosal h | Inflamed | TRGC1     | TR_C_gene  | chr7  | 38297480 | 38305279 | - | 2730  | 50.76372 | 0.004773 | -0.55843 | 0.231367 | -2.41362 | 0.017633 | 0.075489 | 1 |
| ENSG0000 | mucosal h | Inflamed | RP11-283C | antisense  | chr12 | 26278088 | 26279550 | - | 826   | 52.00477 | 0.026253 | 0.531973 | 0.220462 | 2.412989 | 0.017662 | 0.0756   | 1 |
| ENSG0000 | mucosal h | Inflamed | OXT       | protein_cc | chr20 | 3052266  | 3053163  | + | 513   | 2.904535 | 0.400955 | -0.43507 | 0.180316 | -2.41283 | 0.017669 | 0.075618 | 1 |
| ENSG0000 | mucosal h | Inflamed | RN7SL125I | misc_RNA   | chr17 | 46842918 | 46843209 | - | 292   | 2.529833 | 0.491647 | 0.432485 | 0.179265 | 2.412549 | 0.017682 | 0.075662 | 1 |
| ENSG0000 | mucosal h | Inflamed | RP1-309F2 | processed  | chr20 | 57438583 | 57463864 | - | 1521  | 10.29356 | 0.045346 | 0.469118 | 0.194503 | 2.411875 | 0.017713 | 0.075781 | 1 |
| ENSG0000 | mucosal h | Inflamed | RP11-350M | antisense  | chr8  | 38265566 | 38266260 | - | 695   | 5.718377 | 0.183771 | 0.523489 | 0.217064 | 2.411684 | 0.017722 | 0.075806 | 1 |
| ENSG0000 | mucosal h | Inflamed | VAPB      | protein_cc | chr20 | 56964178 | 57026157 | + | 10585 | 3006.224 | 0        | 0.27922  | 0.115788 | 2.411477 | 0.017731 | 0.075835 | 1 |
| ENSG0000 | mucosal h | Inflamed | USP7      | protein_cc | chr16 | 8985951  | 9058371  | - | 7969  | 5279.294 | 0        | 0.412886 | 0.171227 | 2.411333 | 0.017738 | 0.075851 | 1 |
| ENSG0000 | mucosal h | Inflamed | RP11-977C | antisense  | chr12 | 56702652 | 56703233 | + | 437   | 1.119332 | 0.701671 | 0.27609  | 0.114512 | 2.411019 | 0.017752 | 0.0759   | 1 |
| ENSG0000 | mucosal h | Inflamed | CHL1      | protein_cc | chr3  | 238279   | 451090   | + | 11845 | 406.0644 | 0.002387 | -0.68353 | 0.283516 | -2.4109  | 0.017758 | 0.075903 | 1 |
| ENSG0000 | mucosal h | Inflamed | UTF1      | protein_cc | chr10 | 1.35E+08 | 1.35E+08 | + | 1157  | 1.081146 | 0.754177 | -0.34176 | 0.141758 | -2.41088 | 0.017759 | 0.075903 | 1 |
| ENSG0000 | mucosal h | Inflamed | PLA2R1    | protein_cc | chr2  | 1.61E+08 | 1.61E+08 | - | 9803  | 351.2792 | 0.002387 | 0.510152 | 0.21161  | 2.410811 | 0.017762 | 0.075903 | 1 |
| ENSG0000 | mucosal h | Inflamed | RP11-488L | pseudoger  | chr1  | 2.47E+08 | 2.47E+08 | + | 270   | 2.102625 | 0.498807 | 0.37877  | 0.157117 | 2.41075  | 0.017765 | 0.075903 | 1 |
| ENSG0000 | mucosal h | Inflamed | FAM219A   | protein_cc | chr9  | 34398182 | 34458568 | - | 3782  | 850.1862 | 0        | -0.34105 | 0.141505 | -2.41017 | 0.017791 | 0.076005 | 1 |
| ENSG0000 | mucosal h | Inflamed | KB-1184D  | lincRNA    | chr8  | 95109992 | 95116550 | - | 668   | 2.147971 | 0.501193 | 0.360386 | 0.149537 | 2.410004 | 0.017799 | 0.076025 | 1 |
| ENSG0000 | mucosal h | Inflamed | SYDE2     | protein_cc | chr1  | 85622556 | 85666729 | - | 6451  | 118.9427 | 0.004773 | 0.632562 | 0.262507 | 2.409696 | 0.017813 | 0.076073 | 1 |
| ENSG0000 | mucosal h | Inflamed | ZSWIM6    | protein_cc | chr5  | 60628100 | 60841997 | + | 5501  | 1550.024 | 0        | 0.438709 | 0.182077 | 2.40947  | 0.017824 | 0.076085 | 1 |
| ENSG0000 | mucosal h | Inflamed | RP11-340F | sense_ove  | chr12 | 1.22E+08 | 1.22E+08 | + | 477   | 27.10501 | 0.019093 | -0.56158 | 0.233072 | -2.40947 | 0.017824 | 0.076085 | 1 |
| ENSG0000 | mucosal h | Inflamed | INE1      | sense_intr | chrX  | 47064320 | 47065264 | + | 945   | 99.97613 | 0.031026 | 0.70145  | 0.291124 | 2.40945  | 0.017824 | 0.076085 | 1 |
| ENSG0000 | mucosal h | Inflamed | CA10      | protein_cc | chr17 | 49707674 | 50237377 | - | 4450  | 7.403341 | 0.24105  | 0.521451 | 0.21646  | 2.408998 | 0.017845 | 0.076161 | 1 |
| ENSG0000 | mucosal h | Inflamed | B3GNT6    | protein_cc | chr11 | 76745385 | 76753096 | + | 2762  | 3343.874 | 0        | 0.77991  | 0.323773 | 2.408817 | 0.017854 | 0.076184 | 1 |
| ENSG0000 | mucosal h | Inflamed | CLCN4     | protein_cc | chrX  | 10125024 | 10205700 | + | 6750  | 212.6348 | 0        | -0.46483 | 0.192976 | -2.40872 | 0.017858 | 0.07619  | 1 |
| ENSG0000 | mucosal h | Inflamed | DISP2     | protein_cc | chr15 | 40650436 | 40663257 | + | 5171  | 827.5561 | 0        | 0.593585 | 0.246454 | 2.408497 | 0.017868 | 0.076218 | 1 |
| ENSG0000 | mucosal h | Inflamed | IL36B     | protein_cc | chr2  | 1.14E+08 | 1.14E+08 | - | 1869  | 1.069212 | 0.785203 | -0.40021 | 0.166169 | -2.40846 | 0.01787  | 0.076218 | 1 |
| ENSG0000 | mucosal h | Inflamed | FBXW4     | protein_cc | chr10 | 1.03E+08 | 1.03E+08 | - | 5036  | 1877.523 | 0        | 0.215833 | 0.089621 | 2.408298 | 0.017878 | 0.076237 | 1 |
| ENSG0000 | mucosal h | Inflamed | BPNT1     | protein_cc | chr1  | 2.2E+08  | 2.2E+08  | - | 3115  | 1526.05  | 0        | 0.35175  | 0.146074 | 2.408021 | 0.01789  | 0.076267 | 1 |
| ENSG0000 | mucosal h | Inflamed | ASTE1     | protein_cc | chr3  | 1.31E+08 | 1.31E+08 | - | 3427  | 336.8831 | 0        | 0.371279 | 0.154184 | 2.40802  | 0.01789  | 0.076267 | 1 |
| ENSG0000 | mucosal h | Inflamed | RP3-325F2 | antisense  | chr6  | 1.37E+08 | 1.37E+08 | + | 1894  | 73.60143 | 0.002387 | 0.516256 | 0.214451 | 2.407343 | 0.017922 | 0.076388 | 1 |
| ENSG0000 | mucosal h | Inflamed | FRMD6-AS  | lincRNA    | chr14 | 51921230 | 52066670 | - | 917   | 1.448687 | 0.673031 | 0.487405 | 0.202486 | 2.407102 | 0.017933 | 0.076423 | 1 |
| ENSG0000 | mucosal h | Inflamed | KB-1471A  | lincRNA    | chr8  | 1.21E+08 | 1.21E+08 | - | 1945  | 1.331742 | 0.658711 | 0.31673  | 0.131594 | 2.406881 | 0.017943 | 0.076455 | 1 |
| ENSG0000 | mucosal h | Inflamed | RDH8      | protein_cc | chr19 | 10123925 | 10132955 | + | 2001  | 3.553699 | 0.568019 | -0.68724 | 0.285551 | -2.4067  | 0.017951 | 0.076478 | 1 |
| ENSG0000 | mucosal h | Inflamed | LINC01003 | lincRNA    | chr7  | 1.52E+08 | 1.52E+08 | + | 1764  | 160.6945 | 0        | 0.311824 | 0.129569 | 2.406613 | 0.017956 | 0.076483 | 1 |
| ENSG0000 | mucosal h | Inflamed | CCBL1     | protein_cc | chr9  | 1.32E+08 | 1.32E+08 | - | 3602  | 123.4415 | 0        | -0.29882 | 0.124178 | -2.40638 | 0.017966 | 0.076516 | 1 |
| ENSG0000 | mucosal h | Inflamed | TYSND1    | protein_cc | chr10 | 71897737 | 71906432 | - | 4597  | 1079.425 | 0        | 0.232808 | 0.096761 | 2.406021 | 0.017983 | 0.076575 | 1 |
| ENSG0000 | mucosal h | Inflamed | SPCS1     | protein_cc | chr3  | 52738971 | 52742182 | + | 2344  | 3945.265 | 0        | -0.27697 | 0.115122 | -2.40592 | 0.017988 | 0.076582 | 1 |
| ENSG0000 | mucosal h | Inflamed | NPIP3     | protein_cc | chr16 | 21413558 | 21459888 | - | 5591  | 480.864  | 0.002387 | 0.580169 | 0.241156 | 2.405779 | 0.017994 | 0.076598 | 1 |
| ENSG0000 | mucosal h | Inflamed | NAALADL2  | protein_cc | chr3  | 1.74E+08 | 1.76E+08 | + | 8680  | 153.8974 | 0        | 0.501744 | 0.20857  | 2.405643 | 0.018001 | 0.076613 | 1 |
| ENSG0000 | mucosal h | Inflamed | NDUFA3P2  | pseudoger  | chr15 | 90929046 | 90929295 | + | 250   | 2.085919 | 0.486874 | 0.329738 | 0.13708  | 2.405444 | 0.01801  | 0.07664  | 1 |
| ENSG0000 | mucosal h | Inflamed | MAP3K14-  | antisense  | chr17 | 43325292 | 43345997 | + | 3775  | 104.7995 | 0.004773 | 0.40196  | 0.16712  | 2.405215 | 0.01802  | 0.076672 | 1 |
| ENSG0000 | mucosal h | Inflamed | ITGA8     | protein_cc | chr10 | 15555948 | 15762124 | - | 7528  | 905.864  | 0        | -0.5354  | 0.222629 | -2.40488 | 0.018036 | 0.076726 | 1 |

|          |           |          |            |            |       |          |          |   |       |          |          |          |          |          |          |          |   |
|----------|-----------|----------|------------|------------|-------|----------|----------|---|-------|----------|----------|----------|----------|----------|----------|----------|---|
| ENSG0000 | mucosal h | Inflamed | BDKRB1     | protein_cc | chr14 | 96722161 | 96735304 | + | 2755  | 123.6945 | 0        | 0.456774 | 0.189945 | 2.40477  | 0.018041 | 0.076736 | 1 |
| ENSG0000 | mucosal h | Inflamed | GUK1       | protein_cc | chr1  | 2.28E+08 | 2.28E+08 | + | 4725  | 4765.926 | 0        | -0.28531 | 0.118665 | -2.40432 | 0.018062 | 0.076813 | 1 |
| ENSG0000 | mucosal h | Inflamed | MIR143     | miRNA      | chr5  | 1.49E+08 | 1.49E+08 | + | 106   | 7.112172 | 0.190931 | 0.614961 | 0.255794 | 2.404125 | 0.018071 | 0.076839 | 1 |
| ENSG0000 | mucosal h | Inflamed | C14orf144  | protein_cc | chr14 | 1.05E+08 | 1.05E+08 | + | 1624  | 15.89499 | 0.062053 | 0.498556 | 0.207419 | 2.403616 | 0.018095 | 0.076927 | 1 |
| ENSG0000 | mucosal h | Inflamed | GAB1       | protein_cc | chr4  | 1.44E+08 | 1.44E+08 | + | 10119 | 1225.943 | 0        | 0.461359 | 0.191955 | 2.403473 | 0.018102 | 0.076934 | 1 |
| ENSG0000 | mucosal h | Inflamed | RP11-439L  | antisense  | chr6  | 1.43E+08 | 1.43E+08 | - | 2484  | 1.181384 | 0.696897 | -0.3253  | 0.135347 | -2.40346 | 0.018102 | 0.076934 | 1 |
| ENSG0000 | mucosal h | Inflamed | PKP2       | protein_cc | chr12 | 32943679 | 33049774 | - | 6069  | 7225.189 | 0        | 0.700271 | 0.291444 | 2.402764 | 0.018135 | 0.077049 | 1 |
| ENSG0000 | mucosal h | Inflamed | LMOD3      | protein_cc | chr3  | 69156023 | 69172183 | - | 4276  | 3.434368 | 0.408115 | -0.44236 | 0.18411  | -2.4027  | 0.018138 | 0.077049 | 1 |
| ENSG0000 | mucosal h | Inflamed | HMG2P4     | pseudoger  | chr15 | 45803334 | 45878488 | + | 3091  | 209.3198 | 0        | 0.515788 | 0.214673 | 2.402664 | 0.01814  | 0.077049 | 1 |
| ENSG0000 | mucosal h | Inflamed | STAG3L2    | pseudoger  | chr7  | 74112305 | 74306731 | - | 2252  | 253.6396 | 0.009547 | 0.515937 | 0.214739 | 2.402627 | 0.018141 | 0.077049 | 1 |
| ENSG0000 | mucosal h | Inflamed | NPIPP1     | pseudoger  | chr16 | 15198178 | 15225458 | - | 3586  | 142.9165 | 0        | 0.347403 | 0.144619 | 2.402204 | 0.018161 | 0.077121 | 1 |
| ENSG0000 | mucosal h | Inflamed | TMPRSS4    | protein_cc | chr11 | 1.18E+08 | 1.18E+08 | + | 9922  | 10408.47 | 0        | 0.612707 | 0.25507  | 2.402112 | 0.018165 | 0.077127 | 1 |
| ENSG0000 | mucosal h | Inflamed | RP11-196C  | lincRNA    | chr16 | 31054471 | 31061201 | + | 461   | 10.66348 | 0.078759 | 0.473659 | 0.197219 | 2.401684 | 0.018185 | 0.077194 | 1 |
| ENSG0000 | mucosal h | Inflamed | KIF16B     | protein_cc | chr20 | 16252749 | 16554078 | - | 6278  | 1781.702 | 0        | 0.536226 | 0.223274 | 2.401647 | 0.018187 | 0.077194 | 1 |
| ENSG0000 | mucosal h | Inflamed | AMZ1       | protein_cc | chr7  | 2719156  | 2815134  | + | 7011  | 17.90215 | 0.081146 | -0.77244 | 0.321676 | -2.40129 | 0.018204 | 0.077244 | 1 |
| ENSG0000 | mucosal h | Inflamed | NDN        | protein_cc | chr15 | 23930565 | 23932450 | - | 1886  | 674.7279 | 0        | -0.49911 | 0.207854 | -2.40127 | 0.018205 | 0.077244 | 1 |
| ENSG0000 | mucosal h | Inflamed | hsa-mir-45 | miRNA      | chr14 | 1.06E+08 | 1.06E+08 | - | 70    | 59.73508 | 0.040573 | -0.85162 | 0.354663 | -2.4012  | 0.018208 | 0.077246 | 1 |
| ENSG0000 | mucosal h | Inflamed | FANCC      | protein_cc | chr9  | 97861336 | 98079991 | - | 7089  | 591.8544 | 0        | 0.250607 | 0.104389 | 2.400708 | 0.018231 | 0.077323 | 1 |
| ENSG0000 | mucosal h | Inflamed | ABCC1      | protein_cc | chr16 | 16043434 | 16236931 | + | 7575  | 3431.601 | 0        | -0.36586 | 0.152397 | -2.40069 | 0.018232 | 0.077323 | 1 |
| ENSG0000 | mucosal h | Inflamed | AVL9       | protein_cc | chr7  | 32535038 | 33078516 | + | 14928 | 2851.263 | 0        | 0.438875 | 0.182822 | 2.400568 | 0.018238 | 0.077334 | 1 |
| ENSG0000 | mucosal h | Inflamed | KIAA0355   | protein_cc | chr19 | 34745442 | 34846491 | + | 7459  | 1606.473 | 0        | 0.425942 | 0.177454 | 2.400297 | 0.018251 | 0.077361 | 1 |
| ENSG0000 | mucosal h | Inflamed | RP11-480C  | lincRNA    | chr1  | 1.6E+08  | 1.6E+08  | + | 1266  | 605.3723 | 0.004773 | 0.737038 | 0.307064 | 2.400278 | 0.018251 | 0.077361 | 1 |
| ENSG0000 | mucosal h | Inflamed | FAM110B    | protein_cc | chr8  | 58907068 | 59116838 | + | 4943  | 160.4057 | 0.00716  | -0.5864  | 0.24431  | -2.40024 | 0.018253 | 0.077361 | 1 |
| ENSG0000 | mucosal h | Inflamed | AF127936   | lincRNA    | chr21 | 16134031 | 16135411 | - | 695   | 19.47255 | 0.023866 | -0.57539 | 0.239728 | -2.40016 | 0.018257 | 0.077361 | 1 |
| ENSG0000 | mucosal h | Inflamed | C15orf40   | protein_cc | chr15 | 83657193 | 83680393 | - | 4323  | 327.7876 | 0        | 0.255143 | 0.106304 | 2.400122 | 0.018259 | 0.077361 | 1 |
| ENSG0000 | mucosal h | Inflamed | NLRP3      | protein_cc | chr1  | 2.48E+08 | 2.48E+08 | + | 4757  | 287.7518 | 0        | -0.6356  | 0.264893 | -2.39947 | 0.01829  | 0.077462 | 1 |
| ENSG0000 | mucosal h | Inflamed | RP11-572C  | lincRNA    | chr3  | 48709888 | 48710166 | + | 279   | 1.031026 | 0.73747  | 0.276283 | 0.115148 | 2.39937  | 0.018294 | 0.077462 | 1 |
| ENSG0000 | mucosal h | Inflamed | GCOM1      | protein_cc | chr15 | 57884106 | 58006943 | + | 7597  | 42.33174 | 0.031026 | 0.639082 | 0.266355 | 2.399361 | 0.018295 | 0.077462 | 1 |
| ENSG0000 | mucosal h | Inflamed | NUS1P3     | pseudoger  | chr13 | 24902349 | 24903210 | + | 862   | 4.183771 | 0.391408 | 0.502208 | 0.209313 | 2.399318 | 0.018297 | 0.077462 | 1 |
| ENSG0000 | mucosal h | Inflamed | MOB3A      | protein_cc | chr19 | 2071037  | 2096672  | - | 4149  | 3882.749 | 0        | -0.33035 | 0.137689 | -2.39924 | 0.0183   | 0.077462 | 1 |
| ENSG0000 | mucosal h | Inflamed | RP5-1112C  | lincRNA    | chr6  | 1.12E+08 | 1.12E+08 | + | 1385  | 12.43198 | 0.069212 | 0.520705 | 0.217029 | 2.399239 | 0.0183   | 0.077462 | 1 |
| ENSG0000 | mucosal h | Inflamed | RP11-175E  | pseudoger  | chr1  | 2.02E+08 | 2.02E+08 | + | 1562  | 0.892601 | 0.78043  | 0.286737 | 0.119518 | 2.399104 | 0.018307 | 0.077477 | 1 |
| ENSG0000 | mucosal h | Inflamed | RP11-195E  | lincRNA    | chr5  | 70328995 | 70330227 | - | 707   | 23.38425 | 0.205251 | 0.578779 | 0.241254 | 2.399038 | 0.01831  | 0.077477 | 1 |
| ENSG0000 | mucosal h | Inflamed | SCNN1D     | protein_cc | chr1  | 1215816  | 1227409  | + | 4025  | 127.2387 | 0        | -0.50659 | 0.211171 | -2.39894 | 0.018314 | 0.077484 | 1 |
| ENSG0000 | mucosal h | Inflamed | Y_RNA      | misc_RNA   | chr12 | 1.02E+08 | 1.02E+08 | + | 111   | 1.124105 | 0.727924 | 0.291703 | 0.121619 | 2.398501 | 0.018335 | 0.077553 | 1 |
| ENSG0000 | mucosal h | Inflamed | LINC00862  | lincRNA    | chr1  | 2E+08    | 2E+08    | - | 1757  | 2.863962 | 0.403341 | -0.46361 | 0.193292 | -2.39847 | 0.018337 | 0.077553 | 1 |
| ENSG0000 | mucosal h | Inflamed | RP11-673E  | pseudoger  | chr4  | 1.45E+08 | 1.45E+08 | - | 540   | 9.505967 | 0.062053 | -0.45143 | 0.188226 | -2.39836 | 0.018342 | 0.077554 | 1 |
| ENSG0000 | mucosal h | Inflamed | ACVR2A     | protein_cc | chr2  | 1.49E+08 | 1.49E+08 | + | 6768  | 458.4415 | 0        | 0.53986  | 0.225097 | 2.398341 | 0.018343 | 0.077554 | 1 |
| ENSG0000 | mucosal h | Inflamed | DBN1       | protein_cc | chr5  | 1.77E+08 | 1.77E+08 | - | 5119  | 1322.298 | 0        | -0.52829 | 0.220294 | -2.39813 | 0.018353 | 0.077584 | 1 |
| ENSG0000 | mucosal h | Inflamed | RP3-523C2  | lincRNA    | chr6  | 1.32E+08 | 1.32E+08 | + | 746   | 3.902148 | 0.229117 | 0.442946 | 0.184736 | 2.397728 | 0.018372 | 0.077652 | 1 |

|          |           |          |           |                  |          |          |   |       |          |          |          |          |          |          |          |   |
|----------|-----------|----------|-----------|------------------|----------|----------|---|-------|----------|----------|----------|----------|----------|----------|----------|---|
| ENSG0000 | mucosal h | Inflamed | LEKR1     | protein_cc chr3  | 1.57E+08 | 1.57E+08 | + | 5581  | 13.09308 | 0.023866 | 0.428634 | 0.17878  | 2.397552 | 0.01838  | 0.077663 | 1 |
| ENSG0000 | mucosal h | Inflamed | PRAC1     | protein_cc chr17 | 46799084 | 46799884 | - | 383   | 400.2506 | 0.186158 | 1.319199 | 0.550234 | 2.397524 | 0.018381 | 0.077663 | 1 |
| ENSG0000 | mucosal h | Inflamed | TNFAIP8   | protein_cc chr5  | 1.19E+08 | 1.19E+08 | + | 9591  | 859.2721 | 0        | -0.46357 | 0.193358 | -2.39749 | 0.018383 | 0.077663 | 1 |
| ENSG0000 | mucosal h | Inflamed | SECISBP2  | protein_cc chr9  | 91933421 | 91974557 | + | 9793  | 2192.167 | 0        | 0.372589 | 0.155416 | 2.397374 | 0.018389 | 0.077673 | 1 |
| ENSG0000 | mucosal h | Inflamed | ZDHHC22   | protein_cc chr14 | 77597613 | 77609077 | - | 3862  | 1.906921 | 0.601432 | 0.449582 | 0.187617 | 2.39628  | 0.01844  | 0.077879 | 1 |
| ENSG0000 | mucosal h | Inflamed | RP11-632F | pseudoger chr4   | 40788127 | 40788727 | + | 601   | 7.24105  | 0.100239 | 0.480267 | 0.200432 | 2.396157 | 0.018446 | 0.077892 | 1 |
| ENSG0000 | mucosal h | Inflamed | OAS3      | protein_cc chr12 | 1.13E+08 | 1.13E+08 | + | 8251  | 4606.554 | 0        | -0.40825 | 0.170382 | -2.39609 | 0.01845  | 0.077893 | 1 |
| ENSG0000 | mucosal h | Inflamed | LAMA5     | protein_cc chr20 | 60883011 | 60942368 | - | 14705 | 3833.451 | 0        | -0.57264 | 0.239058 | -2.39541 | 0.018482 | 0.078004 | 1 |
| ENSG0000 | mucosal h | Inflamed | RP11-86H  | lincRNA chr1     | 95086707 | 95089740 | - | 2272  | 61.39857 | 0.004773 | 0.377383 | 0.157544 | 2.39541  | 0.018482 | 0.078004 | 1 |
| ENSG0000 | mucosal h | Inflamed | OLFM4     | protein_cc chr13 | 53602894 | 53626192 | + | 2897  | 69595.18 | 0        | -0.98811 | 0.412524 | -2.39527 | 0.018488 | 0.078014 | 1 |
| ENSG0000 | mucosal h | Inflamed | ACYP1     | protein_cc chr14 | 75519924 | 75536186 | - | 1841  | 189.9976 | 0        | 0.449063 | 0.187482 | 2.395234 | 0.01849  | 0.078014 | 1 |
| ENSG0000 | mucosal h | Inflamed | SCMH1     | protein_cc chr1  | 41492872 | 41707826 | - | 4447  | 1643.635 | 0        | 0.168588 | 0.07039  | 2.395052 | 0.018499 | 0.078038 | 1 |
| ENSG0000 | mucosal h | Inflamed | RNASEK-C  | protein_cc chr17 | 6915954  | 6920839  | + | 1947  | 39.93556 | 0        | -0.32888 | 0.137339 | -2.39464 | 0.018519 | 0.078109 | 1 |
| ENSG0000 | mucosal h | Inflamed | MUCL1     | protein_cc chr12 | 55224303 | 55252177 | + | 1250  | 6.451074 | 0.610979 | -0.90994 | 0.380017 | -2.39448 | 0.018526 | 0.078129 | 1 |
| ENSG0000 | mucosal h | Inflamed | PROM1     | protein_cc chr4  | 15964699 | 16086001 | - | 7465  | 2961.778 | 0        | 0.69659  | 0.290954 | 2.394162 | 0.018541 | 0.07818  | 1 |
| ENSG0000 | mucosal h | Inflamed | KLHL32    | protein_cc chr6  | 97372605 | 97588630 | + | 3777  | 40.72792 | 0.016706 | 0.644986 | 0.269461 | 2.393618 | 0.018567 | 0.078277 | 1 |
| ENSG0000 | mucosal h | Inflamed | DGCR2     | protein_cc chr22 | 19023795 | 19109967 | - | 5596  | 7256.582 | 0        | 0.320416 | 0.133891 | 2.393108 | 0.018592 | 0.078367 | 1 |
| ENSG0000 | mucosal h | Inflamed | AC097467  | antisense chr4   | 1.56E+08 | 1.56E+08 | + | 4801  | 7.928401 | 0.477327 | -0.82657 | 0.345406 | -2.39303 | 0.018595 | 0.078368 | 1 |
| ENSG0000 | mucosal h | Inflamed | SNED1     | protein_cc chr2  | 2.42E+08 | 2.42E+08 | + | 13592 | 1636.48  | 0        | -0.55748 | 0.232963 | -2.39298 | 0.018598 | 0.078368 | 1 |
| ENSG0000 | mucosal h | Inflamed | SNORD12   | snoRNA chr20     | 47897220 | 47897309 | + | 90    | 7.446301 | 0.150358 | 0.539857 | 0.225625 | 2.392717 | 0.01861  | 0.078408 | 1 |
| ENSG0000 | mucosal h | Inflamed | TESPA1    | protein_cc chr12 | 55341802 | 55378530 | - | 5025  | 252.1122 | 0        | -0.5333  | 0.222894 | -2.39263 | 0.018615 | 0.078413 | 1 |
| ENSG0000 | mucosal h | Inflamed | PTGDR2    | protein_cc chr11 | 60618413 | 60623444 | - | 2895  | 521.7017 | 0        | 0.690026 | 0.288408 | 2.392537 | 0.018619 | 0.078419 | 1 |
| ENSG0000 | mucosal h | Inflamed | RN7SL614  | misc_RNA chr1    | 10676893 | 10677170 | + | 278   | 1.930788 | 0.501193 | 0.352192 | 0.147212 | 2.392413 | 0.018625 | 0.078432 | 1 |
| ENSG0000 | mucosal h | Inflamed | CLIP2     | protein_cc chr7  | 73703805 | 73820273 | + | 7315  | 5579.683 | 0        | 0.357964 | 0.14963  | 2.392337 | 0.018629 | 0.078434 | 1 |
| ENSG0000 | mucosal h | Inflamed | GRID1     | protein_cc chr10 | 87359312 | 88126250 | - | 6033  | 163.043  | 0.004773 | -0.58896 | 0.246214 | -2.39206 | 0.018642 | 0.078478 | 1 |
| ENSG0000 | mucosal h | Inflamed | GPR107    | protein_cc chr9  | 1.33E+08 | 1.33E+08 | + | 9135  | 5540.415 | 0        | 0.341263 | 0.14269  | 2.391647 | 0.018662 | 0.078541 | 1 |
| ENSG0000 | mucosal h | Inflamed | AK2P2     | pseudoger chr2   | 32048482 | 32048886 | - | 405   | 2.002387 | 0.501193 | 0.348561 | 0.145743 | 2.391621 | 0.018663 | 0.078541 | 1 |
| ENSG0000 | mucosal h | Inflamed | DLD       | protein_cc chr7  | 1.08E+08 | 1.08E+08 | + | 5299  | 2581.594 | 0        | 0.435198 | 0.181976 | 2.391513 | 0.018668 | 0.07855  | 1 |
| ENSG0000 | mucosal h | Inflamed | RP11-327F | antisense chr16  | 50774821 | 50776726 | - | 640   | 12.29117 | 0.095465 | -0.55493 | 0.232063 | -2.39127 | 0.01868  | 0.078583 | 1 |
| ENSG0000 | mucosal h | Inflamed | CTD-2269f | antisense chr5   | 83680245 | 83786583 | + | 1370  | 14.70167 | 0.016706 | 0.43725  | 0.182856 | 2.391226 | 0.018682 | 0.078583 | 1 |
| ENSG0000 | mucosal h | Inflamed | HMG5      | protein_cc chrX  | 80369200 | 80457441 | - | 2416  | 79.23628 | 0        | 0.504221 | 0.210876 | 2.391075 | 0.018689 | 0.078601 | 1 |
| ENSG0000 | mucosal h | Inflamed | LINC00665 | lincRNA chr19    | 36803969 | 36822620 | - | 7201  | 146.9236 | 0        | -0.34924 | 0.14608  | -2.39073 | 0.018706 | 0.078658 | 1 |
| ENSG0000 | mucosal h | Inflamed | RP11-212F | lincRNA chr7     | 1.28E+08 | 1.28E+08 | - | 7054  | 356.3556 | 0        | 0.251218 | 0.105088 | 2.390555 | 0.018714 | 0.078681 | 1 |
| ENSG0000 | mucosal h | Inflamed | CYS1      | protein_cc chr2  | 10196907 | 10221071 | - | 2847  | 166.4391 | 0.002387 | 0.567823 | 0.237544 | 2.390389 | 0.018722 | 0.078697 | 1 |
| ENSG0000 | mucosal h | Inflamed | ABHD17Af  | pseudoger chr17  | 20717933 | 20747570 | + | 1044  | 4.372315 | 0.171838 | -0.39875 | 0.166817 | -2.39035 | 0.018724 | 0.078697 | 1 |
| ENSG0000 | mucosal h | Inflamed | CCDC85B   | protein_cc chr11 | 65657875 | 65659105 | + | 1231  | 642.821  | 0        | -0.41743 | 0.17467  | -2.3898  | 0.01875  | 0.078796 | 1 |
| ENSG0000 | mucosal h | Inflamed | AC008746  | lincRNA chr19    | 54949847 | 54950362 | - | 516   | 20.54893 | 0.031026 | 0.539893 | 0.225952 | 2.389412 | 0.018769 | 0.078862 | 1 |
| ENSG0000 | mucosal h | Inflamed | ZNF326    | protein_cc chr1  | 90460671 | 90501090 | + | 10984 | 1043.1   | 0        | 0.558099 | 0.233581 | 2.389315 | 0.018774 | 0.078869 | 1 |
| ENSG0000 | mucosal h | Inflamed | RP11-655C | lincRNA chr11    | 58265361 | 58273231 | - | 1002  | 3.513126 | 0.360382 | -0.51567 | 0.215853 | -2.38897 | 0.01879  | 0.078918 | 1 |
| ENSG0000 | mucosal h | Inflamed | RP11-214C | lincRNA chr17    | 14207171 | 14208822 | + | 1652  | 28.96181 | 0.031026 | -0.52964 | 0.221703 | -2.38895 | 0.018791 | 0.078918 | 1 |



|          |           |          |           |            |       |          |          |   |       |          |          |          |          |          |          |          |   |
|----------|-----------|----------|-----------|------------|-------|----------|----------|---|-------|----------|----------|----------|----------|----------|----------|----------|---|
| ENSG0000 | mucosal h | Inflamed | ADCK1     | protein_cc | chr14 | 78266426 | 78401355 | + | 5317  | 469.8067 | 0        | 0.201329 | 0.084293 | 2.388436 | 0.018816 | 0.07901  | 1 |
| ENSG0000 | mucosal h | Inflamed | AC010148  | processed  | chr2  | 2.36E+08 | 2.36E+08 | - | 2973  | 2.823389 | 0.367542 | 0.407287 | 0.170547 | 2.38812  | 0.018832 | 0.079053 | 1 |
| ENSG0000 | mucosal h | Inflamed | BLK       | protein_cc | chr8  | 11351510 | 11422113 | + | 4803  | 403.2458 | 0.002387 | -0.86338 | 0.361533 | -2.3881  | 0.018833 | 0.079053 | 1 |
| ENSG0000 | mucosal h | Inflamed | SGK494    | protein_cc | chr17 | 26934982 | 26941218 | - | 4663  | 64.88305 | 0.038186 | 0.701179 | 0.293641 | 2.387882 | 0.018843 | 0.079084 | 1 |
| ENSG0000 | mucosal h | Inflamed | ADCK5     | protein_cc | chr8  | 1.46E+08 | 1.46E+08 | + | 2742  | 691.8473 | 0        | 0.255331 | 0.106936 | 2.387698 | 0.018852 | 0.079109 | 1 |
| ENSG0000 | mucosal h | Inflamed | LDB2      | protein_cc | chr4  | 16503164 | 16900432 | - | 5586  | 468.6325 | 0        | -0.47582 | 0.199304 | -2.3874  | 0.018866 | 0.079157 | 1 |
| ENSG0000 | mucosal h | Inflamed | DQX1      | protein_cc | chr2  | 74745258 | 74753463 | - | 2940  | 1031.747 | 0        | 0.558063 | 0.233776 | 2.387171 | 0.018878 | 0.079191 | 1 |
| ENSG0000 | mucosal h | Inflamed | TIPARP-AS | antisense  | chr3  | 1.56E+08 | 1.56E+08 | - | 1254  | 14.53461 | 0.023866 | 0.429615 | 0.179982 | 2.386984 | 0.018887 | 0.079216 | 1 |
| ENSG0000 | mucosal h | Inflamed | ZNF850    | protein_cc | chr19 | 37205285 | 37263727 | - | 7843  | 55.34368 | 0.019093 | 0.570991 | 0.239244 | 2.386643 | 0.018903 | 0.079273 | 1 |
| ENSG0000 | mucosal h | Inflamed | AP001044  | lincRNA    | chr21 | 40285093 | 40287072 | - | 407   | 5.190931 | 0.143198 | 0.435716 | 0.182578 | 2.386467 | 0.018912 | 0.079296 | 1 |
| ENSG0000 | mucosal h | Inflamed | ARHGEF37  | protein_cc | chr5  | 1.49E+08 | 1.49E+08 | + | 5324  | 1066.916 | 0        | 0.427214 | 0.179057 | 2.385908 | 0.018939 | 0.079392 | 1 |
| ENSG0000 | mucosal h | Inflamed | NECAP2    | protein_cc | chr1  | 16767167 | 16786573 | + | 5559  | 2239.967 | 0        | -0.17625 | 0.073874 | -2.38587 | 0.018941 | 0.079392 | 1 |
| ENSG0000 | mucosal h | Inflamed | ACMSD     | protein_cc | chr2  | 1.36E+08 | 1.36E+08 | + | 2785  | 6.315036 | 0.725537 | -0.82881 | 0.3474   | -2.38575 | 0.018946 | 0.079404 | 1 |
| ENSG0000 | mucosal h | Inflamed | HABP2     | protein_cc | chr10 | 1.15E+08 | 1.15E+08 | + | 3740  | 40.72792 | 0.381862 | -1.09482 | 0.458941 | -2.38553 | 0.018957 | 0.079437 | 1 |
| ENSG0000 | mucosal h | Inflamed | AC062017  | protein_cc | chr2  | 2.4E+08  | 2.4E+08  | + | 613   | 12.80907 | 0.00716  | -0.38397 | 0.160965 | -2.38543 | 0.018962 | 0.079444 | 1 |
| ENSG0000 | mucosal h | Inflamed | SCARA3    | protein_cc | chr8  | 27491385 | 27534293 | + | 4031  | 1261.348 | 0        | -0.55394 | 0.232225 | -2.38534 | 0.018966 | 0.079449 | 1 |
| ENSG0000 | mucosal h | Inflamed | DCN       | protein_cc | chr12 | 91539025 | 91576900 | - | 8083  | 7662.248 | 0        | -0.68137 | 0.285757 | -2.38442 | 0.019011 | 0.079624 | 1 |
| ENSG0000 | mucosal h | Inflamed | RP4-740C4 | sense_intr | chr1  | 2294500  | 2295067  | - | 568   | 8.310263 | 0.105012 | 0.48681  | 0.204195 | 2.384045 | 0.01903  | 0.079689 | 1 |
| ENSG0000 | mucosal h | Inflamed | CLEC4C    | protein_cc | chr12 | 7882011  | 7904201  | - | 1551  | 5.539379 | 0.357995 | -0.57039 | 0.239311 | -2.38348 | 0.019057 | 0.079792 | 1 |
| ENSG0000 | mucosal h | Inflamed | DCUN1D5   | protein_cc | chr11 | 1.03E+08 | 1.03E+08 | - | 1700  | 380.7757 | 0        | -0.31848 | 0.133636 | -2.38318 | 0.019072 | 0.079841 | 1 |
| ENSG0000 | mucosal h | Inflamed | TIMM8A    | protein_cc | chrX  | 1.01E+08 | 1.01E+08 | - | 2629  | 210.3628 | 0        | 0.277509 | 0.116449 | 2.383082 | 0.019077 | 0.079848 | 1 |
| ENSG0000 | mucosal h | Inflamed | KIAA2013  | protein_cc | chr1  | 11979648 | 11986485 | - | 3281  | 5258.489 | 0        | 0.213854 | 0.089741 | 2.383017 | 0.01908  | 0.079849 | 1 |
| ENSG0000 | mucosal h | Inflamed | RP11-83A2 | pseudoger  | chr4  | 1.4E+08  | 1.4E+08  | - | 1240  | 1.601432 | 0.618138 | 0.398812 | 0.167372 | 2.382791 | 0.019091 | 0.079882 | 1 |
| ENSG0000 | mucosal h | Inflamed | DUSP21    | protein_cc | chrX  | 44703249 | 44704130 | + | 882   | 2.238663 | 0.732697 | 0.278933 | 0.117067 | 2.382676 | 0.019097 | 0.079893 | 1 |
| ENSG0000 | mucosal h | Inflamed | PEX26     | protein_cc | chr22 | 18560689 | 18613905 | + | 20042 | 7426.169 | 0        | 0.392655 | 0.164808 | 2.382508 | 0.019105 | 0.079915 | 1 |
| ENSG0000 | mucosal h | Inflamed | RP11-731I | pseudoger  | chr2  | 28531028 | 28531437 | + | 410   | 1.976134 | 0.51074  | 0.355756 | 0.149341 | 2.382167 | 0.019121 | 0.079972 | 1 |
| ENSG0000 | mucosal h | Inflamed | KB-1991G8 | lincRNA    | chr8  | 1.01E+08 | 1.01E+08 | + | 546   | 3.245823 | 0.424821 | 0.50299  | 0.211181 | 2.381794 | 0.01914  | 0.080029 | 1 |
| ENSG0000 | mucosal h | Inflamed | PHOSPHO2  | protein_cc | chr2  | 1.71E+08 | 1.71E+08 | + | 1477  | 69.90215 | 0        | 0.422796 | 0.177515 | 2.381748 | 0.019142 | 0.080029 | 1 |
| ENSG0000 | mucosal h | Inflamed | ZNF512B   | protein_cc | chr20 | 62588055 | 62680113 | - | 6018  | 721.926  | 0        | -0.48734 | 0.204617 | -2.3817  | 0.019144 | 0.080029 | 1 |
| ENSG0000 | mucosal h | Inflamed | RP4-657E1 | pseudoger  | chr1  | 19623574 | 19624397 | + | 525   | 10.50119 | 0.162291 | 0.583615 | 0.245052 | 2.381592 | 0.01915  | 0.080039 | 1 |
| ENSG0000 | mucosal h | Inflamed | PRKCB     | protein_cc | chr16 | 23847322 | 24231932 | + | 10037 | 1231.549 | 0        | -0.54052 | 0.226965 | -2.38152 | 0.019153 | 0.080041 | 1 |
| ENSG0000 | mucosal h | Inflamed | ATG4B     | protein_cc | chr2  | 2.43E+08 | 2.43E+08 | + | 6638  | 2581.126 | 0        | 0.221224 | 0.092912 | 2.380989 | 0.019179 | 0.080137 | 1 |
| ENSG0000 | mucosal h | Inflamed | FGB       | protein_cc | chr4  | 1.55E+08 | 1.55E+08 | + | 2708  | 2.322196 | 0.852029 | -0.53488 | 0.224686 | -2.38058 | 0.019199 | 0.080209 | 1 |
| ENSG0000 | mucosal h | Inflamed | HTR3A     | protein_cc | chr11 | 1.14E+08 | 1.14E+08 | + | 2772  | 28.66348 | 0.121718 | -0.96046 | 0.403532 | -2.38013 | 0.019222 | 0.080281 | 1 |
| ENSG0000 | mucosal h | Inflamed | MTMR3     | protein_cc | chr22 | 30279144 | 30426855 | + | 9903  | 3513.78  | 0        | 0.2996   | 0.125878 | 2.38008  | 0.019224 | 0.080281 | 1 |
| ENSG0000 | mucosal h | Inflamed | DRAP1     | protein_cc | chr11 | 65686728 | 65689032 | + | 1737  | 1518.384 | 0        | -0.24428 | 0.10264  | -2.37999 | 0.019229 | 0.080281 | 1 |
| ENSG0000 | mucosal h | Inflamed | LINC00261 | lincRNA    | chr20 | 22528309 | 22559280 | - | 5552  | 1972.797 | 0        | 0.936688 | 0.393572 | 2.379963 | 0.01923  | 0.080281 | 1 |
| ENSG0000 | mucosal h | Inflamed | KCNE2     | protein_cc | chr21 | 35736323 | 35743688 | + | 1051  | 6.914081 | 0.374702 | 0.498085 | 0.20929  | 2.37988  | 0.019234 | 0.080281 | 1 |
| ENSG0000 | mucosal h | Inflamed | WASH7P    | pseudoger  | chr1  | 14363    | 29806    | - | 2073  | 309.5131 | 0        | 0.235292 | 0.098868 | 2.379857 | 0.019235 | 0.080281 | 1 |
| ENSG0000 | mucosal h | Inflamed | CCDC101   | protein_cc | chr16 | 28565236 | 28603111 | + | 2124  | 461.58   | 0        | 0.199086 | 0.08367  | 2.379416 | 0.019257 | 0.080359 | 1 |

|          |           |          |                     |            |          |          |          |     |          |          |          |          |          |          |          |          |   |
|----------|-----------|----------|---------------------|------------|----------|----------|----------|-----|----------|----------|----------|----------|----------|----------|----------|----------|---|
| ENSG0000 | mucosal h | Inflamed | RP1-273G: pseudoger | chr8       | 33827079 | 33827397 | -        | 319 | 8.854415 | 0.042959 | 0.410006 | 0.17232  | 2.379333 | 0.019261 | 0.080363 | 1        |   |
| ENSG0000 | mucosal h | Inflamed | IL2                 | protein_cc | chr4     | 1.23E+08 | 1.23E+08 | -   | 1119     | 1.98568  | 0.541766 | 0.366138 | 0.153893 | 2.379181 | 0.019268 | 0.080371 | 1 |
| ENSG0000 | mucosal h | Inflamed | CRAT                | protein_cc | chr9     | 1.32E+08 | 1.32E+08 | -   | 3803     | 3977.907 | 0        | 0.331182 | 0.1392   | 2.379173 | 0.019269 | 0.080371 | 1 |
| ENSG0000 | mucosal h | Inflamed | TMEM121             | protein_cc | chr14    | 1.06E+08 | 1.06E+08 | +   | 1904     | 41.95943 | 0.002387 | -0.56358 | 0.236894 | -2.37903 | 0.019276 | 0.080388 | 1 |
| ENSG0000 | mucosal h | Inflamed | DSP                 | protein_cc | chr6     | 7541808  | 7586950  | +   | 10093    | 13356.16 | 0        | 0.643117 | 0.270369 | 2.378667 | 0.019294 | 0.080449 | 1 |
| ENSG0000 | mucosal h | Inflamed | ZMAT4               | protein_cc | chr8     | 40388109 | 40755352 | -   | 3691     | 2.190931 | 0.53222  | 0.436848 | 0.183667 | 2.378478 | 0.019303 | 0.080476 | 1 |
| ENSG0000 | mucosal h | Inflamed | RP4-753P3           | prime_ov   | chrX     | 1.29E+08 | 1.29E+08 | +   | 326      | 9.031026 | 0.171838 | -0.52516 | 0.220812 | -2.37831 | 0.019311 | 0.08049  | 1 |
| ENSG0000 | mucosal h | Inflamed | GXYLT2              | protein_cc | chr3     | 72937224 | 73047289 | +   | 3667     | 169.1575 | 0        | 0.461818 | 0.194182 | 2.378276 | 0.019313 | 0.08049  | 1 |
| ENSG0000 | mucosal h | Inflamed | KRT40               | protein_cc | chr17    | 39133968 | 39143387 | -   | 2225     | 9.052506 | 0.200477 | 0.660367 | 0.277678 | 2.378175 | 0.019318 | 0.08049  | 1 |
| ENSG0000 | mucosal h | Inflamed | AQP11               | protein_cc | chr11    | 77300436 | 77321400 | +   | 2396     | 162.642  | 0        | 0.489579 | 0.205867 | 2.378129 | 0.01932  | 0.08049  | 1 |
| ENSG0000 | mucosal h | Inflamed | PARD6B              | protein_cc | chr20    | 49348081 | 49373332 | +   | 4726     | 326.8449 | 0.002387 | 0.615741 | 0.258921 | 2.3781   | 0.019322 | 0.08049  | 1 |
| ENSG0000 | mucosal h | Inflamed | SYT10               | protein_cc | chr12    | 33527173 | 33592754 | -   | 5082     | 6.5179   | 0.181384 | 0.549846 | 0.231222 | 2.377996 | 0.019327 | 0.080494 | 1 |
| ENSG0000 | mucosal h | Inflamed | AC051649            | sense_ove  | chr11    | 1885407  | 1887897  | +   | 330      | 0.890215 | 0.775656 | 0.330516 | 0.138991 | 2.377957 | 0.019329 | 0.080494 | 1 |
| ENSG0000 | mucosal h | Inflamed | ZNF600              | protein_cc | chr19    | 53267448 | 53290044 | -   | 4669     | 415.5919 | 0        | 0.525675 | 0.221086 | 2.377692 | 0.019342 | 0.080536 | 1 |
| ENSG0000 | mucosal h | Inflamed | RP11-525A           | lincRNA    | chr10    | 1.12E+08 | 1.12E+08 | -   | 628      | 1.479714 | 0.649165 | -0.40512 | 0.170428 | -2.37706 | 0.019373 | 0.080649 | 1 |
| ENSG0000 | mucosal h | Inflamed | DNAJB5              | protein_cc | chr9     | 34989638 | 34998897 | +   | 5891     | 314.4582 | 0.002387 | -0.50023 | 0.210445 | -2.37702 | 0.019375 | 0.080649 | 1 |
| ENSG0000 | mucosal h | Inflamed | PROX1-AS1           | antisense  | chr1     | 2.14E+08 | 2.14E+08 | -   | 8976     | 7.463007 | 0.083532 | 0.499062 | 0.209976 | 2.376762 | 0.019388 | 0.080656 | 1 |
| ENSG0000 | mucosal h | Inflamed | CYP4F8              | processed  | chr19    | 15726029 | 15741448 | +   | 7047     | 2.205251 | 0.637232 | 0.399168 | 0.167948 | 2.376733 | 0.01939  | 0.080656 | 1 |
| ENSG0000 | mucosal h | Inflamed | DKK2                | protein_cc | chr4     | 1.08E+08 | 1.08E+08 | -   | 4319     | 5.026253 | 0.451074 | -0.62782 | 0.264159 | -2.37669 | 0.019392 | 0.080656 | 1 |
| ENSG0000 | mucosal h | Inflamed | RP1-212G1           | antisense  | chrX     | 47518232 | 47519776 | +   | 1545     | 11.86874 | 0.042959 | 0.344401 | 0.144909 | 2.376677 | 0.019392 | 0.080656 | 1 |
| ENSG0000 | mucosal h | Inflamed | ANXA2               | protein_cc | chr15    | 60639333 | 60695082 | -   | 8822     | 26769.08 | 0        | -0.35971 | 0.15135  | -2.37667 | 0.019393 | 0.080656 | 1 |
| ENSG0000 | mucosal h | Inflamed | SETP9               | pseudoger  | chr1     | 1.61E+08 | 1.61E+08 | +   | 832      | 1.484487 | 0.649165 | -0.36689 | 0.154385 | -2.37646 | 0.019403 | 0.080689 | 1 |
| ENSG0000 | mucosal h | Inflamed | RP4-548D1           | antisense  | chr7     | 1.51E+08 | 1.51E+08 | +   | 574      | 47.94749 | 0        | 0.429185 | 0.180668 | 2.37555  | 0.019448 | 0.080852 | 1 |
| ENSG0000 | mucosal h | Inflamed | RAB7L1              | protein_cc | chr1     | 2.06E+08 | 2.06E+08 | -   | 3882     | 702.7136 | 0        | -0.43094 | 0.181405 | -2.37554 | 0.019449 | 0.080852 | 1 |
| ENSG0000 | mucosal h | Inflamed | RP11-244F           | pseudoger  | chr15    | 63245372 | 63246323 | +   | 952      | 1.768496 | 0.529833 | 0.320686 | 0.135007 | 2.375331 | 0.019459 | 0.080883 | 1 |
| ENSG0000 | mucosal h | Inflamed | FAM120A             | protein_cc | chr9     | 96208776 | 96215874 | -   | 3717     | 1899.905 | 0        | 0.21944  | 0.092394 | 2.37504  | 0.019474 | 0.080931 | 1 |
| ENSG0000 | mucosal h | Inflamed | RP4-635E1           | antisense  | chr1     | 11089716 | 11090585 | +   | 870      | 145.5871 | 0        | 0.652728 | 0.274838 | 2.374953 | 0.019478 | 0.080936 | 1 |
| ENSG0000 | mucosal h | Inflamed | SYT8                | protein_cc | chr11    | 1848709  | 1858751  | +   | 4854     | 51.08592 | 0.01432  | 0.618058 | 0.260255 | 2.374816 | 0.019485 | 0.080951 | 1 |
| ENSG0000 | mucosal h | Inflamed | ANKS6               | protein_cc | chr9     | 1.01E+08 | 1.02E+08 | -   | 8804     | 1418.055 | 0        | 0.253009 | 0.106543 | 2.374708 | 0.01949  | 0.080961 | 1 |
| ENSG0000 | mucosal h | Inflamed | NRBP1               | protein_cc | chr2     | 27650657 | 27665126 | +   | 5329     | 3964.487 | 0        | -0.15779 | 0.066447 | -2.37461 | 0.019495 | 0.080963 | 1 |
| ENSG0000 | mucosal h | Inflamed | S100B               | protein_cc | chr21    | 48018875 | 48025121 | -   | 1448     | 212.6659 | 0        | -0.54116 | 0.227896 | -2.37458 | 0.019497 | 0.080963 | 1 |
| ENSG0000 | mucosal h | Inflamed | AKTIP               | protein_cc | chr16    | 53524952 | 53538323 | -   | 5202     | 570.3675 | 0        | 0.287414 | 0.121048 | 2.374389 | 0.019506 | 0.080989 | 1 |
| ENSG0000 | mucosal h | Inflamed | GH1                 | protein_cc | chr17    | 61994560 | 61996179 | -   | 1177     | 2.97136  | 0.355609 | -0.43096 | 0.181515 | -2.37422 | 0.019515 | 0.081011 | 1 |
| ENSG0000 | mucosal h | Inflamed | LMF2                | protein_cc | chr22    | 50941376 | 50946135 | -   | 3071     | 4134.024 | 0        | -0.25214 | 0.106206 | -2.37403 | 0.019524 | 0.081038 | 1 |
| ENSG0000 | mucosal h | Inflamed | SLC12A8             | protein_cc | chr3     | 1.25E+08 | 1.25E+08 | -   | 5728     | 710.3461 | 0        | 0.351054 | 0.147883 | 2.373856 | 0.019533 | 0.081061 | 1 |
| ENSG0000 | mucosal h | Inflamed | APOL4               | protein_cc | chr22    | 36585172 | 36600886 | -   | 4375     | 384.5585 | 0        | -0.46453 | 0.19571  | -2.37357 | 0.019547 | 0.081107 | 1 |
| ENSG0000 | mucosal h | Inflamed | AC004012            | lincRNA    | chr7     | 95101147 | 95103310 | +   | 534      | 0.880668 | 0.770883 | 0.273871 | 0.115389 | 2.373455 | 0.019553 | 0.081112 | 1 |
| ENSG0000 | mucosal h | Inflamed | FAM20B              | protein_cc | chr1     | 1.79E+08 | 1.79E+08 | +   | 6039     | 1681.616 | 0        | 0.395017 | 0.166435 | 2.373395 | 0.019556 | 0.081112 | 1 |
| ENSG0000 | mucosal h | Inflamed | RNF128              | protein_cc | chrX     | 1.06E+08 | 1.06E+08 | +   | 3432     | 1089.561 | 0.004773 | 0.702366 | 0.295937 | 2.373362 | 0.019558 | 0.081112 | 1 |
| ENSG0000 | mucosal h | Inflamed | SYNPR-AS1           | antisense  | chr3     | 63409272 | 63535727 | -   | 558      | 8.97136  | 0.081146 | 0.50588  | 0.213173 | 2.373094 | 0.019571 | 0.081155 | 1 |

|          |           |          |           |            |       |          |          |   |       |          |          |          |          |          |          |          |   |
|----------|-----------|----------|-----------|------------|-------|----------|----------|---|-------|----------|----------|----------|----------|----------|----------|----------|---|
| ENSG0000 | mucosal h | Inflamed | RP3-395M  | antisense  | chr1  | 2497849  | 2501327  | + | 1297  | 16.5179  | 0.059666 | 0.472364 | 0.199057 | 2.373016 | 0.019575 | 0.081158 | 1 |
| ENSG0000 | mucosal h | Inflamed | NPDC1     | protein_cc | chr9  | 1.4E+08  | 1.4E+08  | - | 2737  | 5270.809 | 0        | 0.341579 | 0.143951 | 2.372891 | 0.019581 | 0.081171 | 1 |
| ENSG0000 | mucosal h | Inflamed | ELL       | protein_cc | chr19 | 18553473 | 18632937 | - | 4929  | 1406.527 | 0        | -0.31949 | 0.134675 | -2.37231 | 0.01961  | 0.081272 | 1 |
| ENSG0000 | mucosal h | Inflamed | CA9       | protein_cc | chr9  | 35673853 | 35681156 | + | 1670  | 84.93795 | 0.009547 | -0.90964 | 0.383444 | -2.37228 | 0.019612 | 0.081272 | 1 |
| ENSG0000 | mucosal h | Inflamed | ISM1      | protein_cc | chr20 | 13202418 | 13281298 | + | 2593  | 15.57518 | 0.107399 | -0.81423 | 0.343247 | -2.37213 | 0.019619 | 0.08129  | 1 |
| ENSG0000 | mucosal h | Inflamed | ZNF846    | protein_cc | chr19 | 9862669  | 9903856  | - | 3912  | 198.5561 | 0        | 0.457164 | 0.192737 | 2.371956 | 0.019628 | 0.081314 | 1 |
| ENSG0000 | mucosal h | Inflamed | BLCAP     | protein_cc | chr20 | 36120874 | 36156333 | - | 3927  | 2834.516 | 0        | 0.255812 | 0.107854 | 2.37183  | 0.019634 | 0.081328 | 1 |
| ENSG0000 | mucosal h | Inflamed | RP11-3297 | pseudoger  | chr1  | 48901639 | 48902895 | + | 1257  | 3.386635 | 0.293556 | 0.328717 | 0.138598 | 2.371739 | 0.019639 | 0.081328 | 1 |
| ENSG0000 | mucosal h | Inflamed | EPGN      | protein_cc | chr4  | 75174190 | 75181024 | + | 1814  | 1.453461 | 0.720764 | -0.4485  | 0.189104 | -2.37171 | 0.019641 | 0.081328 | 1 |
| ENSG0000 | mucosal h | Inflamed | ATP2B1    | protein_cc | chr12 | 89981828 | 90103077 | - | 9491  | 2338.976 | 0        | 0.495711 | 0.209021 | 2.371589 | 0.019646 | 0.081336 | 1 |
| ENSG0000 | mucosal h | Inflamed | RP11-3380 | lincRNA    | chr1  | 2.13E+08 | 2.13E+08 | - | 473   | 3.350835 | 0.27685  | -0.41986 | 0.177041 | -2.37154 | 0.019649 | 0.081336 | 1 |
| ENSG0000 | mucosal h | Inflamed | ADAP2     | protein_cc | chr17 | 29233362 | 29286340 | + | 3750  | 609.8162 | 0        | -0.26839 | 0.113176 | -2.37144 | 0.019654 | 0.081343 | 1 |
| ENSG0000 | mucosal h | Inflamed | FCRL4     | protein_cc | chr1  | 1.58E+08 | 1.58E+08 | - | 3875  | 51.358   | 0.081146 | -0.86369 | 0.364213 | -2.37139 | 0.019657 | 0.081343 | 1 |
| ENSG0000 | mucosal h | Inflamed | AC137932  | antisense  | chr16 | 89387541 | 89391518 | + | 1360  | 1.355609 | 0.708831 | -0.36635 | 0.1545   | -2.37123 | 0.019665 | 0.081363 | 1 |
| ENSG0000 | mucosal h | Inflamed | RNASEH2A  | protein_cc | chr19 | 12917394 | 12924452 | + | 2039  | 429.7924 | 0        | -0.24985 | 0.105382 | -2.37092 | 0.01968  | 0.081414 | 1 |
| ENSG0000 | mucosal h | Inflamed | CAB39L    | protein_cc | chr13 | 49882786 | 50018262 | - | 5082  | 221.043  | 0        | 0.360564 | 0.152088 | 2.370759 | 0.019688 | 0.08143  | 1 |
| ENSG0000 | mucosal h | Inflamed | TMEM168   | protein_cc | chr7  | 1.12E+08 | 1.12E+08 | - | 7995  | 1377.122 | 0        | 0.50502  | 0.213024 | 2.370722 | 0.01969  | 0.08143  | 1 |
| ENSG0000 | mucosal h | Inflamed | YAE1D1    | protein_cc | chr7  | 39605975 | 39649919 | + | 2569  | 295.3938 | 0        | 0.351336 | 0.148202 | 2.37066  | 0.019693 | 0.08143  | 1 |
| ENSG0000 | mucosal h | Inflamed | NDRG1     | protein_cc | chr8  | 1.34E+08 | 1.34E+08 | - | 9823  | 22394.34 | 0        | 0.381791 | 0.161061 | 2.370479 | 0.019702 | 0.081455 | 1 |
| ENSG0000 | mucosal h | Inflamed | ETV5      | protein_cc | chr3  | 1.86E+08 | 1.86E+08 | - | 5802  | 476.5561 | 0        | -0.4062  | 0.171419 | -2.36963 | 0.019745 | 0.081619 | 1 |
| ENSG0000 | mucosal h | Inflamed | CFTR      | protein_cc | chr7  | 1.17E+08 | 1.17E+08 | + | 8099  | 3393.057 | 0.004773 | 0.882407 | 0.372433 | 2.369303 | 0.019762 | 0.081675 | 1 |
| ENSG0000 | mucosal h | Inflamed | DENND3    | protein_cc | chr8  | 1.42E+08 | 1.42E+08 | + | 14670 | 2890.94  | 0        | -0.36699 | 0.154913 | -2.36902 | 0.019776 | 0.081709 | 1 |
| ENSG0000 | mucosal h | Inflamed | SOWAHB    | protein_cc | chr4  | 77816082 | 77819002 | - | 2921  | 980.0907 | 0.002387 | 0.620938 | 0.262108 | 2.369016 | 0.019776 | 0.081709 | 1 |
| ENSG0000 | mucosal h | Inflamed | TBC1D12   | protein_cc | chr10 | 96162261 | 96295687 | + | 6921  | 711.864  | 0        | 0.497974 | 0.210214 | 2.368897 | 0.019782 | 0.081721 | 1 |
| ENSG0000 | mucosal h | Inflamed | C8orf33   | protein_cc | chr8  | 1.46E+08 | 1.46E+08 | + | 3378  | 1728.048 | 0        | 0.262214 | 0.1107   | 2.368684 | 0.019793 | 0.081736 | 1 |
| ENSG0000 | mucosal h | Inflamed | NEFH      | protein_cc | chr22 | 29876219 | 29887379 | + | 3783  | 47.95943 | 0.011933 | -0.60947 | 0.257306 | -2.36867 | 0.019794 | 0.081736 | 1 |
| ENSG0000 | mucosal h | Inflamed | AP001462  | lincRNA    | chr11 | 64546426 | 64546877 | + | 452   | 5.050119 | 0.126492 | 0.428094 | 0.180734 | 2.368639 | 0.019795 | 0.081736 | 1 |
| ENSG0000 | mucosal h | Inflamed | SCNN1A    | protein_cc | chr12 | 6456009  | 6486896  | - | 5876  | 14332.77 | 0        | 0.683126 | 0.288445 | 2.368311 | 0.019812 | 0.081792 | 1 |
| ENSG0000 | mucosal h | Inflamed | FOLH1B    | pseudoger  | chr11 | 89371683 | 89431886 | + | 2660  | 2.811456 | 0.768496 | -0.41285 | 0.174348 | -2.36798 | 0.019828 | 0.081837 | 1 |
| ENSG0000 | mucosal h | Inflamed | RCCD1     | protein_cc | chr15 | 91498100 | 91506349 | + | 4963  | 651.9356 | 0        | 0.282366 | 0.119248 | 2.367898 | 0.019833 | 0.081837 | 1 |
| ENSG0000 | mucosal h | Inflamed | CTD-2287  | lincRNA    | chr5  | 1.15E+08 | 1.15E+08 | - | 461   | 0.947494 | 0.735084 | 0.277255 | 0.11709  | 2.367887 | 0.019833 | 0.081837 | 1 |
| ENSG0000 | mucosal h | Inflamed | POLR3H    | protein_cc | chr22 | 41921808 | 41940610 | - | 6577  | 1130.926 | 0        | -0.26152 | 0.110447 | -2.36785 | 0.019835 | 0.081837 | 1 |
| ENSG0000 | mucosal h | Inflamed | RP11-7230 | protein_cc | chr3  | 1.29E+08 | 1.29E+08 | - | 2426  | 12.20286 | 0.033413 | 0.354557 | 0.149745 | 2.367734 | 0.019841 | 0.081848 | 1 |
| ENSG0000 | mucosal h | Inflamed | RP11-4070 | sense_intr | chr16 | 57281262 | 57282404 | + | 358   | 5.854415 | 0.124105 | 0.472571 | 0.199622 | 2.367328 | 0.019862 | 0.08192  | 1 |
| ENSG0000 | mucosal h | Inflamed | 01-Sep    | protein_cc | chr16 | 30389454 | 30407312 | - | 4217  | 459.0907 | 0        | -0.50196 | 0.21205  | -2.36716 | 0.01987  | 0.081943 | 1 |
| ENSG0000 | mucosal h | Inflamed | COLCA1    | protein_cc | chr11 | 1.11E+08 | 1.11E+08 | - | 5784  | 441.0382 | 0        | 0.641155 | 0.270865 | 2.367059 | 0.019875 | 0.081951 | 1 |
| ENSG0000 | mucosal h | Inflamed | RP13-1032 | antisense  | chr17 | 79668354 | 79670330 | - | 1977  | 128.6754 | 0        | 0.25103  | 0.106066 | 2.366735 | 0.019892 | 0.081972 | 1 |
| ENSG0000 | mucosal h | Inflamed | ISLR      | protein_cc | chr15 | 74466012 | 74469213 | + | 2671  | 1473.64  | 0        | -0.69414 | 0.293291 | -2.36673 | 0.019892 | 0.081972 | 1 |
| ENSG0000 | mucosal h | Inflamed | NANOGNB   | pseudoger  | chrX  | 1.01E+08 | 1.01E+08 | - | 565   | 1.606205 | 0.575179 | 0.318839 | 0.134718 | 2.36672  | 0.019892 | 0.081972 | 1 |
| ENSG0000 | mucosal h | Inflamed | AMPH      | protein_cc | chr7  | 38423305 | 38671167 | - | 5636  | 128.4606 | 0.004773 | -0.52299 | 0.220979 | -2.36671 | 0.019893 | 0.081972 | 1 |

|          |           |          |           |            |       |          |          |   |       |          |          |          |          |          |          |          |   |
|----------|-----------|----------|-----------|------------|-------|----------|----------|---|-------|----------|----------|----------|----------|----------|----------|----------|---|
| ENSG0000 | mucosal h | Inflamed | RP11-420  | lincRNA    | chr1  | 70910754 | 70911219 | + | 466   | 4.887828 | 0.164678 | 0.422285 | 0.178467 | 2.366172 | 0.01992  | 0.082072 | 1 |
| ENSG0000 | mucosal h | Inflamed | RP11-530  | lincRNA    | chr5  | 44826178 | 44828694 | + | 2517  | 131.494  | 0.004773 | 0.605488 | 0.255936 | 2.365778 | 0.01994  | 0.082142 | 1 |
| ENSG0000 | mucosal h | Inflamed | MTHFSD    | protein_cc | chr16 | 86563782 | 86588841 | - | 5350  | 683.1432 | 0        | 0.258417 | 0.109239 | 2.365603 | 0.019949 | 0.082166 | 1 |
| ENSG0000 | mucosal h | Inflamed | ARSE      | protein_cc | chrX  | 2852699  | 2886286  | - | 2618  | 1011.394 | 0.004773 | 0.664783 | 0.281042 | 2.365423 | 0.019958 | 0.082178 | 1 |
| ENSG0000 | mucosal h | Inflamed | LIMA1     | protein_cc | chr12 | 50569571 | 50677329 | - | 6317  | 8640.797 | 0        | 0.47585  | 0.201169 | 2.365421 | 0.019958 | 0.082178 | 1 |
| ENSG0000 | mucosal h | Inflamed | FOXN3     | protein_cc | chr14 | 89591215 | 90085493 | - | 11033 | 3400.434 | 0        | 0.436843 | 0.184696 | 2.365194 | 0.01997  | 0.082213 | 1 |
| ENSG0000 | mucosal h | Inflamed | WTAPP1    | pseudoger  | chr11 | 1.03E+08 | 1.03E+08 | + | 3331  | 5.138425 | 0.186158 | 0.466516 | 0.197259 | 2.364987 | 0.019981 | 0.082243 | 1 |
| ENSG0000 | mucosal h | Inflamed | RNU6-807  | snRNA      | chr15 | 1.02E+08 | 1.02E+08 | - | 107   | 1.295943 | 0.656325 | 0.357677 | 0.151247 | 2.364856 | 0.019987 | 0.082258 | 1 |
| ENSG0000 | mucosal h | Inflamed | RP1-193H  | lincRNA    | chr17 | 67547499 | 67550002 | + | 2504  | 335.6563 | 0        | 0.735703 | 0.311114 | 2.364735 | 0.019993 | 0.082266 | 1 |
| ENSG0000 | mucosal h | Inflamed | RASL11B   | protein_cc | chr4  | 53728457 | 53733000 | + | 2470  | 25.16706 | 0.019093 | -0.53868 | 0.227803 | -2.3647  | 0.019995 | 0.082266 | 1 |
| ENSG0000 | mucosal h | Inflamed | REG4      | protein_cc | chr1  | 1.2E+08  | 1.2E+08  | - | 3493  | 28204.17 | 0        | -0.90595 | 0.383128 | -2.36461 | 0.02     | 0.08227  | 1 |
| ENSG0000 | mucosal h | Inflamed | KB-208E9  | lincRNA    | chr22 | 23923067 | 23926046 | - | 1081  | 7.854415 | 0.202864 | 0.562339 | 0.237832 | 2.364433 | 0.020009 | 0.082286 | 1 |
| ENSG0000 | mucosal h | Inflamed | RP11-346C | lincRNA    | chr16 | 73094144 | 73094658 | + | 515   | 4.952267 | 0.231504 | 0.49686  | 0.210141 | 2.364416 | 0.02001  | 0.082286 | 1 |
| ENSG0000 | mucosal h | Inflamed | AP1AR     | protein_cc | chr4  | 1.13E+08 | 1.13E+08 | + | 3444  | 718.8162 | 0.002387 | 0.485707 | 0.205448 | 2.364139 | 0.020024 | 0.082331 | 1 |
| ENSG0000 | mucosal h | Inflamed | FAM195B   | protein_cc | chr17 | 79780287 | 79791178 | - | 3676  | 350.1504 | 0        | -0.37342 | 0.157987 | -2.36361 | 0.020051 | 0.082429 | 1 |
| ENSG0000 | mucosal h | Inflamed | BBS1      | protein_cc | chr11 | 66278077 | 66301098 | + | 6145  | 147.506  | 0.004773 | 0.295041 | 0.124839 | 2.363364 | 0.020063 | 0.082468 | 1 |
| ENSG0000 | mucosal h | Inflamed | DNAJA1P5  | pseudoger  | chr1  | 1.02E+08 | 1.02E+08 | + | 943   | 2.830549 | 0.682578 | -0.60014 | 0.253972 | -2.36301 | 0.020082 | 0.082531 | 1 |
| ENSG0000 | mucosal h | Inflamed | STRC      | protein_cc | chr15 | 43891596 | 44010458 | - | 8407  | 5.861575 | 0.217184 | 0.453034 | 0.191731 | 2.362862 | 0.020089 | 0.082548 | 1 |
| ENSG0000 | mucosal h | Inflamed | RP11-635I | pseudoger  | chr18 | 61082550 | 61083702 | - | 1153  | 0.990453 | 0.72315  | 0.302797 | 0.128158 | 2.362675 | 0.020099 | 0.082575 | 1 |
| ENSG0000 | mucosal h | Inflamed | APP       | protein_cc | chr21 | 27252861 | 27543446 | - | 6349  | 30718.23 | 0        | 0.383881 | 0.162485 | 2.362557 | 0.020105 | 0.082582 | 1 |
| ENSG0000 | mucosal h | Inflamed | MRPS31P5  | pseudoger  | chr13 | 52741844 | 52768600 | - | 3873  | 27.84487 | 0.054893 | 0.597026 | 0.252708 | 2.362517 | 0.020107 | 0.082582 | 1 |
| ENSG0000 | mucosal h | Inflamed | ALDH3A2   | protein_cc | chr17 | 19551449 | 19580911 | + | 6457  | 3443.196 | 0        | 0.411721 | 0.174277 | 2.362445 | 0.020111 | 0.082585 | 1 |
| ENSG0000 | mucosal h | Inflamed | RP11-386I | pseudoger  | chr1  | 78509067 | 78509832 | - | 766   | 11.02625 | 0.069212 | 0.465181 | 0.19695  | 2.36193  | 0.020137 | 0.08268  | 1 |
| ENSG0000 | mucosal h | Inflamed | PDXDC2P   | processed  | chr16 | 70010200 | 70099851 | - | 6186  | 637.1074 | 0        | 0.774322 | 0.327852 | 2.361807 | 0.020143 | 0.082693 | 1 |
| ENSG0000 | mucosal h | Inflamed | TM4SF19   | protein_cc | chr3  | 1.96E+08 | 1.96E+08 | - | 1896  | 5.472554 | 0.412888 | -0.66642 | 0.282178 | -2.3617  | 0.020149 | 0.082702 | 1 |
| ENSG0000 | mucosal h | Inflamed | SUSD5     | protein_cc | chr3  | 33191537 | 33260707 | - | 5005  | 12.06444 | 0.157518 | -0.72148 | 0.305501 | -2.36164 | 0.020152 | 0.082703 | 1 |
| ENSG0000 | mucosal h | Inflamed | FAM110A   | protein_cc | chr20 | 814358   | 838106   | + | 2746  | 769.4535 | 0        | -0.2451  | 0.103809 | -2.36108 | 0.020181 | 0.082807 | 1 |
| ENSG0000 | mucosal h | Inflamed | DLAT      | protein_cc | chr11 | 1.12E+08 | 1.12E+08 | + | 4831  | 1824.931 | 0        | 0.337161 | 0.142804 | 2.360995 | 0.020185 | 0.082813 | 1 |
| ENSG0000 | mucosal h | Inflamed | RP11-890E | lincRNA    | chr11 | 1.31E+08 | 1.31E+08 | - | 3994  | 304.0692 | 0        | 0.49238  | 0.208582 | 2.36061  | 0.020205 | 0.082881 | 1 |
| ENSG0000 | mucosal h | Inflamed | PSKH1     | protein_cc | chr16 | 67927175 | 67963581 | + | 3977  | 2474.523 | 0        | 0.2137   | 0.090534 | 2.360439 | 0.020214 | 0.082897 | 1 |
| ENSG0000 | mucosal h | Inflamed | AC004951  | pseudoger  | chr7  | 44024593 | 44029806 | - | 790   | 18.85203 | 0        | 0.307529 | 0.130289 | 2.360355 | 0.020218 | 0.082897 | 1 |
| ENSG0000 | mucosal h | Inflamed | AP000695  | antisense  | chr21 | 37802658 | 37853368 | + | 893   | 3.274463 | 0.472554 | -0.48498 | 0.205471 | -2.36035 | 0.020218 | 0.082897 | 1 |
| ENSG0000 | mucosal h | Inflamed | C15orf39  | protein_cc | chr15 | 75487984 | 75504510 | + | 5812  | 3330.702 | 0        | -0.33767 | 0.143065 | -2.36023 | 0.020224 | 0.08291  | 1 |
| ENSG0000 | mucosal h | Inflamed | OR2I1P    | pseudoger  | chr6  | 29520996 | 29521943 | + | 948   | 2.307876 | 0.577566 | -0.405   | 0.171599 | -2.36015 | 0.020229 | 0.082914 | 1 |
| ENSG0000 | mucosal h | Inflamed | PGLYRP4   | protein_cc | chr1  | 1.53E+08 | 1.53E+08 | - | 2272  | 8.789976 | 0.341289 | -0.71429 | 0.302685 | -2.35986 | 0.020244 | 0.082962 | 1 |
| ENSG0000 | mucosal h | Inflamed | TALDO1    | protein_cc | chr11 | 747329   | 765024   | + | 3005  | 4768.74  | 0        | -0.21663 | 0.091799 | -2.3598  | 0.020247 | 0.082962 | 1 |
| ENSG0000 | mucosal h | Inflamed | PSD3      | protein_cc | chr8  | 18384811 | 18942240 | - | 15210 | 1148.544 | 0        | 0.592794 | 0.251219 | 2.359668 | 0.020253 | 0.082965 | 1 |
| ENSG0000 | mucosal h | Inflamed | HMG20B    | protein_cc | chr19 | 3572775  | 3579086  | + | 3857  | 2816.601 | 0        | 0.196371 | 0.08322  | 2.35966  | 0.020254 | 0.082965 | 1 |
| ENSG0000 | mucosal h | Inflamed | RP11-343E | pseudoger  | chr3  | 1.42E+08 | 1.42E+08 | - | 576   | 5.579952 | 0.090692 | 0.362122 | 0.153471 | 2.359542 | 0.02026  | 0.082978 | 1 |
| ENSG0000 | mucosal h | Inflamed | PEX1      | protein_cc | chr7  | 92116334 | 92157845 | - | 7849  | 732.9308 | 0        | 0.517167 | 0.219202 | 2.359321 | 0.020271 | 0.083011 | 1 |

|          |           |          |                     |            |          |          |          |     |          |          |          |          |          |          |          |          |   |
|----------|-----------|----------|---------------------|------------|----------|----------|----------|-----|----------|----------|----------|----------|----------|----------|----------|----------|---|
| ENSG0000 | mucosal h | Inflamed | CTD-2325F antisense | chr14      | 69093883 | 69095162 | -        | 279 | 1.668258 | 0.587112 | 0.304401 | 0.129027 | 2.359209 | 0.020277 | 0.083022 | 1        |   |
| ENSG0000 | mucosal h | Inflamed | RP11-91K1 antisense | chr1       | 20140860 | 20145995 | +        | 447 | 4.312649 | 0.25537  | 0.446098 | 0.189102 | 2.359038 | 0.020286 | 0.083045 | 1        |   |
| ENSG0000 | mucosal h | Inflamed | AC132872            | protein_cc | chr17    | 80214131 | 80216080 | +   | 1950     | 4.916468 | 0.281623 | -0.45538 | 0.193049 | -2.35887 | 0.020295 | 0.083058 | 1 |
| ENSG0000 | mucosal h | Inflamed | BNIP1               | protein_cc | chr1     | 1.51E+08 | 1.51E+08 | +   | 2892     | 24.95465 | 0.023866 | 0.471655 | 0.199951 | 2.358854 | 0.020295 | 0.083058 | 1 |
| ENSG0000 | mucosal h | Inflamed | PSD2                | protein_cc | chr5     | 1.39E+08 | 1.39E+08 | +   | 4513     | 8.553699 | 0.119332 | -0.49503 | 0.209882 | -2.35862 | 0.020307 | 0.083094 | 1 |
| ENSG0000 | mucosal h | Inflamed | ATF1                | protein_cc | chr12    | 51157493 | 51214905 | +   | 2790     | 511.2601 | 0        | 0.316222 | 0.134131 | 2.357556 | 0.020363 | 0.083307 | 1 |
| ENSG0000 | mucosal h | Inflamed | SNORA55             | snoRNA     | chr1     | 40033046 | 40033180 | -   | 135      | 8.579952 | 0.147971 | 0.536506 | 0.227617 | 2.357054 | 0.020389 | 0.083401 | 1 |
| ENSG0000 | mucosal h | Inflamed | MCOLN3              | protein_cc | chr1     | 85483765 | 85514182 | -   | 6623     | 65.14081 | 0.011933 | 0.684873 | 0.290586 | 2.356864 | 0.020399 | 0.083428 | 1 |
| ENSG0000 | mucosal h | Inflamed | RFXANK              | protein_cc | chr19    | 19303008 | 19312678 | +   | 2533     | 991.8353 | 0        | -0.18424 | 0.078177 | -2.35673 | 0.020406 | 0.083432 | 1 |
| ENSG0000 | mucosal h | Inflamed | TRIM2               | protein_cc | chr4     | 1.54E+08 | 1.54E+08 | +   | 9333     | 2835.131 | 0        | 0.566467 | 0.240362 | 2.356722 | 0.020406 | 0.083432 | 1 |
| ENSG0000 | mucosal h | Inflamed | FRAT2               | protein_cc | chr10    | 99092255 | 99094458 | -   | 2204     | 1653.718 | 0        | 0.249118 | 0.105709 | 2.356639 | 0.02041  | 0.083437 | 1 |
| ENSG0000 | mucosal h | Inflamed | ARRB2               | protein_cc | chr17    | 4613784  | 4624794  | +   | 4372     | 2456.453 | 0        | -0.36799 | 0.1562   | -2.3559  | 0.020449 | 0.083581 | 1 |
| ENSG0000 | mucosal h | Inflamed | FABP1               | protein_cc | chr2     | 88422510 | 88427635 | -   | 2461     | 45613.02 | 0        | 0.939398 | 0.39882  | 2.355442 | 0.020472 | 0.08366  | 1 |
| ENSG0000 | mucosal h | Inflamed | AP000472            | lincRNA    | chr21    | 23381263 | 23470778 | -   | 1486     | 9.011933 | 0.51074  | 0.484853 | 0.205847 | 2.355406 | 0.020474 | 0.08366  | 1 |
| ENSG0000 | mucosal h | Inflamed | EEF2K               | protein_cc | chr16    | 22217603 | 22298554 | +   | 6357     | 2158.119 | 0        | 0.371936 | 0.157919 | 2.355242 | 0.020483 | 0.083682 | 1 |
| ENSG0000 | mucosal h | Inflamed | BTBD6               | protein_cc | chr14    | 1.06E+08 | 1.06E+08 | +   | 2392     | 2385.243 | 0        | 0.16891  | 0.071719 | 2.355166 | 0.020487 | 0.083686 | 1 |
| ENSG0000 | mucosal h | Inflamed | 05-Mar              | protein_cc | chr10    | 94050920 | 94113721 | +   | 4632     | 991.3461 | 0        | 0.282684 | 0.120044 | 2.354836 | 0.020504 | 0.083743 | 1 |
| ENSG0000 | mucosal h | Inflamed | WDR52               | protein_cc | chr3     | 1.13E+08 | 1.13E+08 | -   | 12160    | 474.969  | 0        | 0.710682 | 0.301832 | 2.354565 | 0.020518 | 0.083788 | 1 |
| ENSG0000 | mucosal h | Inflamed | FXD1                | protein_cc | chr19    | 35629712 | 35634013 | +   | 1801     | 92.04057 | 0        | 0.547035 | 0.232402 | 2.353833 | 0.020556 | 0.083931 | 1 |
| ENSG0000 | mucosal h | Inflamed | RP11-307C           | lincRNA    | chr15    | 77861312 | 77901023 | +   | 844      | 1.420048 | 0.637232 | -0.36133 | 0.153529 | -2.35347 | 0.020576 | 0.083995 | 1 |
| ENSG0000 | mucosal h | Inflamed | ZNF585B             | protein_cc | chr19    | 37672481 | 37709055 | -   | 7538     | 432.7589 | 0        | 0.482746 | 0.20522  | 2.352331 | 0.020635 | 0.084226 | 1 |
| ENSG0000 | mucosal h | Inflamed | RP11-80H            | lincRNA    | chr3     | 1.43E+08 | 1.43E+08 | +   | 746      | 8.649165 | 0.150358 | -0.54113 | 0.230057 | -2.35215 | 0.020645 | 0.084252 | 1 |
| ENSG0000 | mucosal h | Inflamed | ENPP5               | protein_cc | chr6     | 46126924 | 46138708 | -   | 4264     | 114.8759 | 0.002387 | 0.600628 | 0.255409 | 2.351632 | 0.020672 | 0.084349 | 1 |
| ENSG0000 | mucosal h | Inflamed | UGT1A10             | protein_cc | chr2     | 2.35E+08 | 2.35E+08 | +   | 3157     | 868.2053 | 0.009547 | 0.989606 | 0.420839 | 2.351505 | 0.020678 | 0.084363 | 1 |
| ENSG0000 | mucosal h | Inflamed | RP11-305L           | lincRNA    | chr9     | 93881344 | 93945044 | +   | 984      | 6.558473 | 0.236277 | 0.451737 | 0.192113 | 2.351419 | 0.020683 | 0.084369 | 1 |
| ENSG0000 | mucosal h | Inflamed | KIAA0907            | protein_cc | chr1     | 1.56E+08 | 1.56E+08 | -   | 5635     | 2193.234 | 0        | 0.460333 | 0.195795 | 2.351095 | 0.0207   | 0.084425 | 1 |
| ENSG0000 | mucosal h | Inflamed | RP11-12D            | pseudoger  | chr9     | 5356312  | 5356525  | -   | 214      | 1.477327 | 0.603819 | 0.356432 | 0.151622 | 2.350793 | 0.020716 | 0.08446  | 1 |
| ENSG0000 | mucosal h | Inflamed | CTD-2509C           | lincRNA    | chr14    | 65703198 | 65785508 | -   | 1118     | 9.405728 | 0.138425 | -0.58658 | 0.249527 | -2.35078 | 0.020717 | 0.08446  | 1 |
| ENSG0000 | mucosal h | Inflamed | PPFIA3              | protein_cc | chr19    | 49622646 | 49654283 | +   | 6451     | 630.1169 | 0        | 0.333517 | 0.141877 | 2.350751 | 0.020718 | 0.08446  | 1 |
| ENSG0000 | mucosal h | Inflamed | CYP4F25P            | pseudoger  | chr9     | 69477881 | 69478916 | +   | 520      | 2.322196 | 0.546539 | 0.395002 | 0.168047 | 2.350544 | 0.020729 | 0.084491 | 1 |
| ENSG0000 | mucosal h | Inflamed | TMEM161             | protein_cc | chr19    | 19229978 | 19249322 | -   | 3281     | 801.0095 | 0        | -0.20449 | 0.087007 | -2.35028 | 0.020743 | 0.084535 | 1 |
| ENSG0000 | mucosal h | Inflamed | RAB41               | protein_cc | chrX     | 69501943 | 69504852 | +   | 1344     | 1.362768 | 0.706444 | 0.319116 | 0.135783 | 2.350193 | 0.020748 | 0.08454  | 1 |
| ENSG0000 | mucosal h | Inflamed | RP11-800A           | antisense  | chr18    | 77100258 | 77103972 | -   | 502      | 14.16468 | 0.114558 | -0.60477 | 0.257354 | -2.34994 | 0.020761 | 0.084582 | 1 |
| ENSG0000 | mucosal h | Inflamed | PLK3                | protein_cc | chr1     | 45265897 | 45271662 | +   | 3479     | 633.6253 | 0        | -0.42015 | 0.178813 | -2.34966 | 0.020776 | 0.084629 | 1 |
| ENSG0000 | mucosal h | Inflamed | FNDC8               | protein_cc | chr17    | 33448598 | 33457751 | +   | 1388     | 0.811456 | 0.799523 | -0.31624 | 0.134596 | -2.34956 | 0.020781 | 0.084638 | 1 |
| ENSG0000 | mucosal h | Inflamed | RP11-982M           | lincRNA    | chr14    | 1.05E+08 | 1.05E+08 | -   | 723      | 2.193317 | 0.494033 | 0.350488 | 0.149178 | 2.34946  | 0.020786 | 0.084642 | 1 |
| ENSG0000 | mucosal h | Inflamed | AL773604            | antisense  | chr21    | 46222492 | 46224632 | +   | 1031     | 4.138425 | 0.24105  | 0.412457 | 0.175564 | 2.349321 | 0.020794 | 0.084642 | 1 |
| ENSG0000 | mucosal h | Inflamed | RP11-881I           | sense_intr | chr9     | 71041759 | 71044285 | +   | 905      | 0.897375 | 0.782816 | 0.332017 | 0.141329 | 2.349258 | 0.020797 | 0.084642 | 1 |
| ENSG0000 | mucosal h | Inflamed | GMCL1               | protein_cc | chr2     | 70056774 | 70108528 | +   | 4922     | 709.4726 | 0        | 0.440749 | 0.187614 | 2.349232 | 0.020798 | 0.084642 | 1 |
| ENSG0000 | mucosal h | Inflamed | PNRC2               | protein_cc | chr1     | 24285599 | 24289952 | +   | 2564     | 3038.566 | 0        | 0.360074 | 0.153273 | 2.34923  | 0.020798 | 0.084642 | 1 |

|          |           |          |           |            |       |          |          |   |       |          |          |          |          |          |          |          |   |
|----------|-----------|----------|-----------|------------|-------|----------|----------|---|-------|----------|----------|----------|----------|----------|----------|----------|---|
| ENSG0000 | mucosal h | Inflamed | ZNF214    | protein_cc | chr11 | 7020549  | 7041599  | - | 2949  | 36.63484 | 0.011933 | 0.484176 | 0.206113 | 2.349086 | 0.020806 | 0.08466  | 1 |
| ENSG0000 | mucosal h | Inflamed | TRAF1     | protein_cc | chr9  | 1.24E+08 | 1.24E+08 | - | 6449  | 1299.191 | 0        | -0.54961 | 0.234033 | -2.34844 | 0.02084  | 0.084781 | 1 |
| ENSG0000 | mucosal h | Inflamed | FGD5      | protein_cc | chr3  | 14860469 | 14975895 | + | 7869  | 1235.461 | 0        | -0.54757 | 0.233166 | -2.3484  | 0.020842 | 0.084781 | 1 |
| ENSG0000 | mucosal h | Inflamed | PPP2R2DP  | pseudoger  | chr3  | 38093250 | 38093886 | + | 637   | 0.830549 | 0.797136 | 0.225849 | 0.096187 | 2.348023 | 0.020862 | 0.08483  | 1 |
| ENSG0000 | mucosal h | Inflamed | TGFB2     | protein_cc | chr1  | 2.19E+08 | 2.19E+08 | + | 5151  | 76.62053 | 0.02148  | -0.69855 | 0.297509 | -2.34799 | 0.020864 | 0.08483  | 1 |
| ENSG0000 | mucosal h | Inflamed | C4orf19   | protein_cc | chr4  | 37455563 | 37625117 | + | 2770  | 1395.339 | 0.002387 | 0.600262 | 0.25565  | 2.347984 | 0.020864 | 0.08483  | 1 |
| ENSG0000 | mucosal h | Inflamed | AKR1C4    | protein_cc | chr10 | 5237425  | 5260912  | + | 1914  | 3.24821  | 0.785203 | -0.60254 | 0.256625 | -2.34793 | 0.020867 | 0.08483  | 1 |
| ENSG0000 | mucosal h | Inflamed | NMNAT1    | protein_cc | chr1  | 10003486 | 10045559 | + | 4610  | 855.778  | 0        | 0.344473 | 0.146717 | 2.347869 | 0.02087  | 0.08483  | 1 |
| ENSG0000 | mucosal h | Inflamed | AC025335  | antisense  | chr17 | 7816642  | 7819271  | - | 2529  | 128.1504 | 0.002387 | 0.253689 | 0.108084 | 2.347157 | 0.020908 | 0.084962 | 1 |
| ENSG0000 | mucosal h | Inflamed | ZNF664    | protein_cc | chr12 | 1.24E+08 | 1.24E+08 | + | 6340  | 4990.573 | 0        | 0.490164 | 0.208835 | 2.347138 | 0.020909 | 0.084962 | 1 |
| ENSG0000 | mucosal h | Inflamed | NID2      | protein_cc | chr14 | 52471521 | 52535712 | - | 6158  | 1217.979 | 0        | -0.55903 | 0.238219 | -2.34671 | 0.020932 | 0.085037 | 1 |
| ENSG0000 | mucosal h | Inflamed | RAPGEF4   | protein_cc | chr2  | 1.74E+08 | 1.74E+08 | + | 7161  | 120.9356 | 0.004773 | -0.58162 | 0.247848 | -2.34667 | 0.020934 | 0.085037 | 1 |
| ENSG0000 | mucosal h | Inflamed | AC084125  | antisense  | chr8  | 1.46E+08 | 1.46E+08 | + | 895   | 34.04296 | 0.016706 | 0.38274  | 0.163105 | 2.346583 | 0.020939 | 0.085042 | 1 |
| ENSG0000 | mucosal h | Inflamed | FAM132B   | protein_cc | chr2  | 2.39E+08 | 2.39E+08 | + | 3572  | 128.1718 | 0.004773 | -0.97923 | 0.417325 | -2.34644 | 0.020946 | 0.085061 | 1 |
| ENSG0000 | mucosal h | Inflamed | TNIK      | protein_cc | chr3  | 1.71E+08 | 1.71E+08 | - | 8572  | 1720.955 | 0        | 0.44993  | 0.19176  | 2.346318 | 0.020953 | 0.085073 | 1 |
| ENSG0000 | mucosal h | Inflamed | WARS2-IT1 | antisense  | chr1  | 1.2E+08  | 1.2E+08  | + | 2060  | 1.023866 | 0.732697 | -0.25796 | 0.109951 | -2.34616 | 0.020961 | 0.085094 | 1 |
| ENSG0000 | mucosal h | Inflamed | SPECC1    | protein_cc | chr17 | 19912657 | 20222339 | + | 13676 | 2344.396 | 0        | 0.279418 | 0.119108 | 2.345916 | 0.020974 | 0.085134 | 1 |
| ENSG0000 | mucosal h | Inflamed | TRIM45    | protein_cc | chr1  | 1.18E+08 | 1.18E+08 | - | 4368  | 104.0692 | 0.009547 | 0.420575 | 0.179305 | 2.345586 | 0.020992 | 0.085179 | 1 |
| ENSG0000 | mucosal h | Inflamed | RP11-354E | antisense  | chr10 | 19999257 | 20017479 | - | 2151  | 22.30072 | 0.00716  | -0.53338 | 0.227398 | -2.34558 | 0.020992 | 0.085179 | 1 |
| ENSG0000 | mucosal h | Inflamed | RP11-309I | lincRNA    | chr13 | 24553949 | 24609166 | + | 1721  | 5.651551 | 0.186158 | -0.5276  | 0.224944 | -2.34548 | 0.020997 | 0.085188 | 1 |
| ENSG0000 | mucosal h | Inflamed | RPS6KA2   | protein_cc | chr6  | 1.67E+08 | 1.67E+08 | - | 8243  | 2703.835 | 0        | -0.38935 | 0.166026 | -2.3451  | 0.021018 | 0.085257 | 1 |
| ENSG0000 | mucosal h | Inflamed | Y_RNA     | misc_RNA   | chr12 | 51550651 | 51550760 | - | 110   | 1.016706 | 0.735084 | 0.271679 | 0.115853 | 2.345041 | 0.021021 | 0.085257 | 1 |
| ENSG0000 | mucosal h | Inflamed | C15orf53  | protein_cc | chr15 | 38988799 | 38992239 | + | 2043  | 2.369928 | 0.455847 | -0.39291 | 0.167556 | -2.34492 | 0.021027 | 0.08527  | 1 |
| ENSG0000 | mucosal h | Inflamed | PAPSS2    | protein_cc | chr10 | 89419370 | 89507462 | + | 4116  | 9500.895 | 0        | 0.395898 | 0.168844 | 2.34476  | 0.021036 | 0.085291 | 1 |
| ENSG0000 | mucosal h | Inflamed | TTC39A    | protein_cc | chr1  | 51752930 | 51810788 | - | 9362  | 2887.487 | 0        | 0.450536 | 0.192172 | 2.344448 | 0.021052 | 0.085343 | 1 |
| ENSG0000 | mucosal h | Inflamed | TRAV36DV  | TR_V_gene  | chr14 | 22694641 | 22695149 | + | 356   | 4.133652 | 0.281623 | -0.47925 | 0.204421 | -2.3444  | 0.021055 | 0.085343 | 1 |
| ENSG0000 | mucosal h | Inflamed | PER3      | protein_cc | chr1  | 7844380  | 7905237  | + | 8059  | 912.6325 | 0.004773 | 0.533527 | 0.22759  | 2.344246 | 0.021063 | 0.085343 | 1 |
| ENSG0000 | mucosal h | Inflamed | COMP      | protein_cc | chr19 | 18893583 | 18902123 | - | 3100  | 11.06444 | 0.50358  | -0.86431 | 0.368694 | -2.34424 | 0.021063 | 0.085343 | 1 |
| ENSG0000 | mucosal h | Inflamed | RP11-848F | sense_intr | chr17 | 29298670 | 29300330 | + | 1661  | 60.60621 | 0.00716  | 0.376455 | 0.160589 | 2.344219 | 0.021065 | 0.085343 | 1 |
| ENSG0000 | mucosal h | Inflamed | BNIP3     | protein_cc | chr10 | 1.34E+08 | 1.34E+08 | - | 2111  | 232.4081 | 0        | -0.47096 | 0.200927 | -2.34391 | 0.021081 | 0.085387 | 1 |
| ENSG0000 | mucosal h | Inflamed | ZNF782    | protein_cc | chr9  | 99578754 | 99637905 | - | 4619  | 123.7613 | 0        | 0.458948 | 0.195806 | 2.343892 | 0.021082 | 0.085387 | 1 |
| ENSG0000 | mucosal h | Inflamed | AC004775  | lincRNA    | chr5  | 1.32E+08 | 1.32E+08 | - | 753   | 0.840095 | 0.789976 | 0.270985 | 0.115629 | 2.343567 | 0.021099 | 0.085439 | 1 |
| ENSG0000 | mucosal h | Inflamed | CRIPAK    | protein_cc | chr4  | 1385340  | 1389780  | + | 4441  | 651.9093 | 0        | 0.550836 | 0.235047 | 2.343516 | 0.021102 | 0.085439 | 1 |
| ENSG0000 | mucosal h | Inflamed | FAM69A    | protein_cc | chr1  | 93307724 | 93427057 | - | 2574  | 502.179  | 0        | -0.3979  | 0.169791 | -2.34347 | 0.021105 | 0.085439 | 1 |
| ENSG0000 | mucosal h | Inflamed | RP11-738E | lincRNA    | chr4  | 57827093 | 57827539 | - | 447   | 6.816229 | 0.090692 | 0.405735 | 0.173139 | 2.343407 | 0.021108 | 0.085439 | 1 |
| ENSG0000 | mucosal h | Inflamed | SYT11     | protein_cc | chr1  | 1.56E+08 | 1.56E+08 | + | 5240  | 648.6921 | 0        | -0.50878 | 0.21715  | -2.343   | 0.021113 | 0.085503 | 1 |
| ENSG0000 | mucosal h | Inflamed | SPATA13   | protein_cc | chr13 | 24553944 | 24881212 | + | 9941  | 1903.663 | 0        | 0.498009 | 0.212553 | 2.342992 | 0.021113 | 0.085503 | 1 |
| ENSG0000 | mucosal h | Inflamed | JPH3      | protein_cc | chr16 | 87635441 | 87731762 | + | 5941  | 9.835322 | 0.157518 | -0.72148 | 0.307944 | -2.34289 | 0.021136 | 0.085504 | 1 |
| ENSG0000 | mucosal h | Inflamed | CTD-2574I | sense_intr | chr16 | 29930957 | 29933226 | - | 2270  | 201.0143 | 0.00716  | 0.651031 | 0.277878 | 2.342866 | 0.021137 | 0.085504 | 1 |
| ENSG0000 | mucosal h | Inflamed | PPM1A     | protein_cc | chr14 | 60712470 | 60765805 | + | 11860 | 2506.446 | 0        | 0.411943 | 0.175839 | 2.34273  | 0.021144 | 0.08552  | 1 |

|          |           |          |           |                  |          |          |   |       |          |          |          |          |          |          |          |   |
|----------|-----------|----------|-----------|------------------|----------|----------|---|-------|----------|----------|----------|----------|----------|----------|----------|---|
| ENSG0000 | mucosal h | Inflamed | CDSN      | protein_cc chr6  | 31082867 | 31088223 | - | 2552  | 4.677804 | 0.544153 | -0.63237 | 0.269939 | -2.34264 | 0.021149 | 0.085527 | 1 |
| ENSG0000 | mucosal h | Inflamed | BTN3A3    | protein_cc chr6  | 26440700 | 26453643 | + | 5658  | 1832.757 | 0        | -0.36279 | 0.154925 | -2.34171 | 0.021199 | 0.085715 | 1 |
| ENSG0000 | mucosal h | Inflamed | RP11-449L | lincRNA chr18    | 22208146 | 22242162 | + | 2471  | 38.179   | 0.00716  | 0.557925 | 0.238277 | 2.341502 | 0.02121  | 0.085747 | 1 |
| ENSG0000 | mucosal h | Inflamed | NOA1      | protein_cc chr4  | 57829536 | 57844989 | - | 3415  | 1237.64  | 0        | 0.180615 | 0.077141 | 2.341372 | 0.021217 | 0.085759 | 1 |
| ENSG0000 | mucosal h | Inflamed | AQPEP     | protein_cc chr5  | 1.15E+08 | 1.15E+08 | + | 6636  | 7.630072 | 0.338902 | -0.77983 | 0.333074 | -2.34131 | 0.021221 | 0.085759 | 1 |
| ENSG0000 | mucosal h | Inflamed | EMILIN1   | protein_cc chr2  | 27301435 | 27309271 | + | 3953  | 7749.062 | 0        | -0.4868  | 0.207922 | -2.34127 | 0.021223 | 0.085759 | 1 |
| ENSG0000 | mucosal h | Inflamed | PRKAB1    | protein_cc chr12 | 1.2E+08  | 1.2E+08  | + | 6246  | 3104.621 | 0        | 0.263576 | 0.11259  | 2.341029 | 0.021236 | 0.085798 | 1 |
| ENSG0000 | mucosal h | Inflamed | ZNF252P   | pseudoger chr8   | 1.46E+08 | 1.46E+08 | - | 9148  | 626.4726 | 0        | 0.419128 | 0.179056 | 2.340761 | 0.02125  | 0.085843 | 1 |
| ENSG0000 | mucosal h | Inflamed | LOC10042  | pseudoger chr17  | 67090430 | 67091640 | - | 1211  | 0.844869 | 0.785203 | 0.316043 | 0.135038 | 2.340399 | 0.02127  | 0.085908 | 1 |
| ENSG0000 | mucosal h | Inflamed | PSORS1C3  | sense_intr chr6  | 31141512 | 31145676 | - | 593   | 59.60859 | 0.040573 | 0.770349 | 0.329175 | 2.340244 | 0.021278 | 0.085929 | 1 |
| ENSG0000 | mucosal h | Inflamed | NDUFA7    | protein_cc chr19 | 8373167  | 8386263  | - | 580   | 1.553699 | 0.575179 | 0.330791 | 0.141364 | 2.340001 | 0.021291 | 0.085954 | 1 |
| ENSG0000 | mucosal h | Inflamed | AC012442  | lincRNA chr2     | 1.13E+08 | 1.13E+08 | + | 529   | 3.5179   | 0.212411 | 0.372882 | 0.159354 | 2.339953 | 0.021294 | 0.085954 | 1 |
| ENSG0000 | mucosal h | Inflamed | OR13A1    | protein_cc chr10 | 45798102 | 45811056 | - | 2174  | 5.5179   | 0.264916 | -0.51849 | 0.221581 | -2.33995 | 0.021294 | 0.085954 | 1 |
| ENSG0000 | mucosal h | Inflamed | INTU      | protein_cc chr4  | 1.29E+08 | 1.29E+08 | + | 16066 | 205.6945 | 0.004773 | 0.573048 | 0.24498  | 2.339167 | 0.021336 | 0.086111 | 1 |
| ENSG0000 | mucosal h | Inflamed | ATP5C1P1  | pseudoger chr14  | 54457819 | 54458713 | - | 895   | 1.813842 | 0.522673 | 0.311087 | 0.132997 | 2.339044 | 0.021343 | 0.086124 | 1 |
| ENSG0000 | mucosal h | Inflamed | CYSLTR2   | protein_cc chr13 | 49280951 | 49283498 | + | 2548  | 61.47494 | 0.00716  | -0.6343  | 0.271192 | -2.33895 | 0.021348 | 0.086131 | 1 |
| ENSG0000 | mucosal h | Inflamed | SBF2      | protein_cc chr11 | 9800214  | 10315754 | - | 16767 | 1414.01  | 0        | 0.440593 | 0.188395 | 2.338672 | 0.021363 | 0.086179 | 1 |
| ENSG0000 | mucosal h | Inflamed | FOLR1     | protein_cc chr11 | 71900602 | 71907345 | + | 1577  | 16.6778  | 0.131265 | 0.778747 | 0.333011 | 2.338506 | 0.021372 | 0.0862   | 1 |
| ENSG0000 | mucosal h | Inflamed | RP11-188C | pseudoger chr9   | 1.41E+08 | 1.41E+08 | - | 1023  | 25.02148 | 0.052506 | 0.592437 | 0.253346 | 2.338453 | 0.021375 | 0.0862   | 1 |
| ENSG0000 | mucosal h | Inflamed | FAIM3     | protein_cc chr1  | 2.07E+08 | 2.07E+08 | - | 2348  | 956.6635 | 0        | -0.58966 | 0.252181 | -2.33823 | 0.021387 | 0.086236 | 1 |
| ENSG0000 | mucosal h | Inflamed | RP11-793I | protein_cc chr12 | 53900472 | 54019763 | - | 2690  | 45.16468 | 0.026253 | 0.62429  | 0.267005 | 2.338121 | 0.021393 | 0.086243 | 1 |
| ENSG0000 | mucosal h | Inflamed | FPR3      | protein_cc chr19 | 52298416 | 52329442 | + | 2772  | 1111.809 | 0        | -0.44396 | 0.189881 | -2.33808 | 0.021395 | 0.086243 | 1 |
| ENSG0000 | mucosal h | Inflamed | ASCL2     | protein_cc chr11 | 2289725  | 2292182  | - | 1852  | 431.253  | 0        | 0.543903 | 0.232639 | 2.337966 | 0.021401 | 0.086244 | 1 |
| ENSG0000 | mucosal h | Inflamed | IFFO1     | protein_cc chr12 | 6647541  | 6665239  | - | 5193  | 907.6014 | 0        | -0.42455 | 0.181592 | -2.33795 | 0.021402 | 0.086244 | 1 |
| ENSG0000 | mucosal h | Inflamed | CHST14    | protein_cc chr15 | 40763160 | 40765353 | + | 2194  | 519.3437 | 0        | -0.38205 | 0.16342  | -2.33782 | 0.021409 | 0.08626  | 1 |
| ENSG0000 | mucosal h | Inflamed | RP11-297C | antisense chr16  | 30510087 | 30510875 | - | 577   | 3.386635 | 0.451074 | -0.46431 | 0.198656 | -2.33725 | 0.02144  | 0.086369 | 1 |
| ENSG0000 | mucosal h | Inflamed | MFSD6     | protein_cc chr2  | 1.91E+08 | 1.91E+08 | + | 6031  | 2977.167 | 0        | 0.411705 | 0.176168 | 2.337006 | 0.021453 | 0.086411 | 1 |
| ENSG0000 | mucosal h | Inflamed | C1orf210  | protein_cc chr1  | 43747554 | 43751288 | - | 1516  | 1502.623 | 0        | 0.631762 | 0.27037  | 2.336654 | 0.021472 | 0.086474 | 1 |
| ENSG0000 | mucosal h | Inflamed | C7orf13   | protein_cc chr7  | 1.56E+08 | 1.56E+08 | - | 2292  | 124.7876 | 0        | 0.266854 | 0.11422  | 2.336321 | 0.02149  | 0.086534 | 1 |
| ENSG0000 | mucosal h | Inflamed | RP11-38G  | lincRNA chr15    | 80135889 | 80136646 | - | 758   | 4.420048 | 0.188544 | 0.392394 | 0.168007 | 2.335578 | 0.021531 | 0.086683 | 1 |
| ENSG0000 | mucosal h | Inflamed | AC005262  | antisense chr19  | 3121114  | 3122126  | - | 472   | 5.379475 | 0.341289 | -0.56225 | 0.240826 | -2.33466 | 0.021581 | 0.086871 | 1 |
| ENSG0000 | mucosal h | Inflamed | RP11-262I | lincRNA chr9     | 66457285 | 66469310 | + | 3038  | 57.35084 | 0.026253 | -0.72645 | 0.311199 | -2.33435 | 0.021598 | 0.086926 | 1 |
| ENSG0000 | mucosal h | Inflamed | RP11-720L | lincRNA chr18    | 316740   | 317366   | - | 492   | 9.928401 | 0.059666 | 0.470962 | 0.201784 | 2.333996 | 0.021617 | 0.086991 | 1 |
| ENSG0000 | mucosal h | Inflamed | COP55     | protein_cc chr8  | 67955314 | 67996018 | - | 7779  | 1261.234 | 0        | 0.35531  | 0.152242 | 2.333848 | 0.021625 | 0.08701  | 1 |
| ENSG0000 | mucosal h | Inflamed | CEP170B   | protein_cc chr14 | 1.05E+08 | 1.05E+08 | + | 7199  | 10010.15 | 0        | 0.425155 | 0.182186 | 2.33363  | 0.021637 | 0.087045 | 1 |
| ENSG0000 | mucosal h | Inflamed | C1orf85   | protein_cc chr1  | 1.56E+08 | 1.56E+08 | - | 3224  | 1787.298 | 0        | -0.24876 | 0.106605 | -2.33352 | 0.021643 | 0.087057 | 1 |
| ENSG0000 | mucosal h | Inflamed | RP11-747I | sense_intr chr14 | 92223103 | 92226142 | - | 3040  | 150.2005 | 0.002387 | 0.837549 | 0.358949 | 2.333339 | 0.021653 | 0.087073 | 1 |
| ENSG0000 | mucosal h | Inflamed | ROBO1     | protein_cc chr3  | 78646390 | 79816965 | - | 10862 | 1648.952 | 0        | -0.59689 | 0.25581  | -2.33332 | 0.021654 | 0.087073 | 1 |
| ENSG0000 | mucosal h | Inflamed | XKR9      | protein_cc chr8  | 71581600 | 71702606 | + | 3905  | 115.6516 | 0.016706 | -0.78652 | 0.337111 | -2.3331  | 0.021666 | 0.087107 | 1 |
| ENSG0000 | mucosal h | Inflamed | ADM5      | protein_cc chr19 | 50191921 | 50193832 | + | 1718  | 45.44391 | 0        | -0.38491 | 0.164985 | -2.33299 | 0.021672 | 0.08712  | 1 |

|          |           |          |           |             |       |          |          |   |       |          |          |          |          |          |          |          |   |
|----------|-----------|----------|-----------|-------------|-------|----------|----------|---|-------|----------|----------|----------|----------|----------|----------|----------|---|
| ENSG0000 | mucosal h | Inflamed | CTBP2P8   | pseudoger   | chr1  | 68627444 | 68628773 | - | 1330  | 14.24344 | 0.064439 | 0.543773 | 0.233096 | 2.33283  | 0.021681 | 0.087134 | 1 |
| ENSG0000 | mucosal h | Inflamed | RP5-1024M | antisense   | chr1  | 48693560 | 48695233 | - | 1674  | 21.06205 | 0.064439 | 0.658887 | 0.282451 | 2.332746 | 0.021686 | 0.087134 | 1 |
| ENSG0000 | mucosal h | Inflamed | USP2      | protein_cc  | chr11 | 1.19E+08 | 1.19E+08 | - | 4538  | 1089.535 | 0        | 0.743345 | 0.318658 | 2.332741 | 0.021686 | 0.087134 | 1 |
| ENSG0000 | mucosal h | Inflamed | MCM3AP-   | antisense   | chr21 | 47649131 | 47679304 | + | 7605  | 51.62053 | 0.019093 | 0.553052 | 0.237094 | 2.332623 | 0.021692 | 0.087147 | 1 |
| ENSG0000 | mucosal h | Inflamed | ZFP14     | protein_cc  | chr19 | 36827162 | 36870101 | - | 6010  | 221.1217 | 0        | 0.511393 | 0.219334 | 2.331571 | 0.02175  | 0.087366 | 1 |
| ENSG0000 | mucosal h | Inflamed | MSI1      | protein_cc  | chr12 | 1.21E+08 | 1.21E+08 | - | 3090  | 89.27924 | 0.00716  | 0.489017 | 0.20975  | 2.331424 | 0.021758 | 0.087379 | 1 |
| ENSG0000 | mucosal h | Inflamed | CISD3     | protein_cc  | chr17 | 36886488 | 36891297 | + | 2663  | 2087.795 | 0        | 0.305649 | 0.131103 | 2.331356 | 0.021762 | 0.087379 | 1 |
| ENSG0000 | mucosal h | Inflamed | SLC22A10  | protein_cc  | chr11 | 62905339 | 63137190 | + | 3207  | 2.410501 | 0.675418 | -0.49095 | 0.210589 | -2.33133 | 0.021763 | 0.087379 | 1 |
| ENSG0000 | mucosal h | Inflamed | RP11-521I | l.sense_ove | chr8  | 1.02E+08 | 1.02E+08 | - | 1142  | 10.31026 | 0.121718 | 0.536874 | 0.230327 | 2.330925 | 0.021786 | 0.087455 | 1 |
| ENSG0000 | mucosal h | Inflamed | ROS1      | protein_cc  | chr6  | 1.18E+08 | 1.18E+08 | - | 7856  | 18.86874 | 0.116945 | 0.702374 | 0.301361 | 2.330674 | 0.021799 | 0.087497 | 1 |
| ENSG0000 | mucosal h | Inflamed | HADH      | protein_cc  | chr4  | 1.09E+08 | 1.09E+08 | + | 3084  | 3681.974 | 0        | 0.366872 | 0.157422 | 2.330494 | 0.021809 | 0.087523 | 1 |
| ENSG0000 | mucosal h | Inflamed | C16orf45  | protein_cc  | chr16 | 15528152 | 15718885 | + | 3688  | 439.5632 | 0        | -0.45583 | 0.195615 | -2.33024 | 0.021823 | 0.08755  | 1 |
| ENSG0000 | mucosal h | Inflamed | KIF13B    | protein_cc  | chr8  | 28924796 | 29120641 | - | 11112 | 7841.523 | 0        | 0.377996 | 0.162214 | 2.330226 | 0.021824 | 0.08755  | 1 |
| ENSG0000 | mucosal h | Inflamed | AC006111  | pseudoger   | chr16 | 3725411  | 3727060  | + | 1649  | 3.100239 | 0.329356 | 0.380994 | 0.163503 | 2.330193 | 0.021826 | 0.08755  | 1 |
| ENSG0000 | mucosal h | Inflamed | SRRM3     | protein_cc  | chr7  | 75831216 | 75916605 | + | 6878  | 126.8019 | 0        | -0.4158  | 0.178458 | -2.32994 | 0.02184  | 0.087581 | 1 |
| ENSG0000 | mucosal h | Inflamed | LA16c-OS1 | lincRNA     | chr16 | 235747   | 236293   | - | 547   | 7.649165 | 0.090692 | 0.428662 | 0.18398  | 2.329932 | 0.02184  | 0.087581 | 1 |
| ENSG0000 | mucosal h | Inflamed | BCL2      | protein_cc  | chr18 | 60790579 | 60987361 | - | 7665  | 989.2482 | 0        | 0.461588 | 0.198124 | 2.32979  | 0.021848 | 0.087599 | 1 |
| ENSG0000 | mucosal h | Inflamed | RP11-105C | lincRNA     | chr16 | 22623864 | 22624804 | - | 375   | 3.75179  | 0.310263 | 0.459736 | 0.197348 | 2.329566 | 0.02186  | 0.087635 | 1 |
| ENSG0000 | mucosal h | Inflamed | PCBD2     | protein_cc  | chr5  | 1.34E+08 | 1.34E+08 | + | 7171  | 366.5656 | 0        | 0.294841 | 0.126571 | 2.329456 | 0.021867 | 0.087638 | 1 |
| ENSG0000 | mucosal h | Inflamed | RP11-465E | lincRNA     | chr1  | 1104737  | 1105723  | + | 987   | 898.642  | 0        | 0.678071 | 0.291089 | 2.329431 | 0.021868 | 0.087638 | 1 |
| ENSG0000 | mucosal h | Inflamed | NBPF12    | protein_cc  | chr1  | 1.46E+08 | 1.46E+08 | + | 13053 | 186.4916 | 0        | 0.430076 | 0.184641 | 2.329254 | 0.021878 | 0.087664 | 1 |
| ENSG0000 | mucosal h | Inflamed | RP5-908M  | lincRNA     | chr20 | 61004604 | 61006568 | + | 477   | 1.782816 | 0.575179 | 0.314376 | 0.134984 | 2.328993 | 0.021892 | 0.087706 | 1 |
| ENSG0000 | mucosal h | Inflamed | ST6GAL2   | protein_cc  | chr2  | 1.07E+08 | 1.08E+08 | - | 7708  | 82.48687 | 0.064439 | 1.163859 | 0.499737 | 2.328942 | 0.021895 | 0.087706 | 1 |
| ENSG0000 | mucosal h | Inflamed | TECTB     | protein_cc  | chr10 | 1.14E+08 | 1.14E+08 | + | 2936  | 1.916468 | 0.625298 | -0.49478 | 0.212512 | -2.32827 | 0.021932 | 0.087842 | 1 |
| ENSG0000 | mucosal h | Inflamed | ADAMTS1   | antisense   | chr5  | 1.29E+08 | 1.29E+08 | - | 786   | 1.377088 | 0.656325 | 0.300497 | 0.129075 | 2.32808  | 0.021943 | 0.087871 | 1 |
| ENSG0000 | mucosal h | Inflamed | FAN1      | protein_cc  | chr15 | 31196055 | 31235311 | + | 6194  | 1002.048 | 0        | 0.40902  | 0.175697 | 2.327987 | 0.021948 | 0.087878 | 1 |
| ENSG0000 | mucosal h | Inflamed | DNAJC17   | protein_cc  | chr15 | 41060067 | 41099675 | - | 2919  | 359.4487 | 0        | 0.147394 | 0.063327 | 2.327507 | 0.021974 | 0.087964 | 1 |
| ENSG0000 | mucosal h | Inflamed | MAEL      | protein_cc  | chr1  | 1.67E+08 | 1.67E+08 | + | 3043  | 0.811456 | 0.799523 | 0.282448 | 0.121357 | 2.327414 | 0.021979 | 0.087964 | 1 |
| ENSG0000 | mucosal h | Inflamed | TPT1-AS1  | antisense   | chr13 | 45915480 | 45965872 | + | 8479  | 639.5513 | 0        | 0.324206 | 0.139299 | 2.327412 | 0.02198  | 0.087964 | 1 |
| ENSG0000 | mucosal h | Inflamed | BSCL2     | protein_cc  | chr11 | 62457747 | 62477317 | - | 4004  | 297.9761 | 0        | -0.20547 | 0.088286 | -2.32736 | 0.021983 | 0.087964 | 1 |
| ENSG0000 | mucosal h | Inflamed | HPSE      | protein_cc  | chr4  | 84213614 | 84256306 | - | 4721  | 877.3723 | 0        | -0.34076 | 0.146434 | -2.32708 | 0.021998 | 0.087991 | 1 |
| ENSG0000 | mucosal h | Inflamed | CD99L2    | protein_cc  | chrX  | 1.5E+08  | 1.5E+08  | - | 5732  | 1569.962 | 0        | -0.31774 | 0.136541 | -2.32705 | 0.022    | 0.087991 | 1 |
| ENSG0000 | mucosal h | Inflamed | ESYT2     | protein_cc  | chr7  | 1.59E+08 | 1.59E+08 | - | 7094  | 4611.31  | 0        | 0.31807  | 0.136687 | 2.326999 | 0.022003 | 0.087991 | 1 |
| ENSG0000 | mucosal h | Inflamed | TMEM55A   | protein_cc  | chr8  | 92006024 | 92053292 | - | 3066  | 201.1504 | 0        | -0.45491 | 0.195493 | -2.327   | 0.022003 | 0.087991 | 1 |
| ENSG0000 | mucosal h | Inflamed | EIF5A     | protein_cc  | chr17 | 7210318  | 7215774  | + | 2807  | 13927.58 | 0        | -0.17541 | 0.075385 | -2.32684 | 0.022012 | 0.088009 | 1 |
| ENSG0000 | mucosal h | Inflamed | ANXA2R    | protein_cc  | chr5  | 43039335 | 43043272 | - | 2234  | 83.33652 | 0        | -0.42158 | 0.181185 | -2.3268  | 0.022014 | 0.088009 | 1 |
| ENSG0000 | mucosal h | Inflamed | FAM85A    | antisense   | chr8  | 12051976 | 12053789 | + | 1361  | 17.13604 | 0.0358   | 0.429029 | 0.184395 | 2.326681 | 0.02202  | 0.08802  | 1 |
| ENSG0000 | mucosal h | Inflamed | NKX2-2    | protein_cc  | chr20 | 21491648 | 21494664 | - | 2092  | 44.06444 | 0.040573 | 0.789421 | 0.339316 | 2.326508 | 0.02203  | 0.088037 | 1 |
| ENSG0000 | mucosal h | Inflamed | LEFTY1    | protein_cc  | chr1  | 2.26E+08 | 2.26E+08 | - | 1891  | 2390.809 | 0.002387 | 0.986104 | 0.42386  | 2.326485 | 0.022031 | 0.088037 | 1 |
| ENSG0000 | mucosal h | Inflamed | GRB14     | protein_cc  | chr2  | 1.65E+08 | 1.65E+08 | - | 2969  | 29.83294 | 0.011933 | 0.576247 | 0.247705 | 2.326344 | 0.022039 | 0.088047 | 1 |



|          |           |          |           |            |       |          |          |   |       |          |          |          |          |          |          |          |   |
|----------|-----------|----------|-----------|------------|-------|----------|----------|---|-------|----------|----------|----------|----------|----------|----------|----------|---|
| ENSG0000 | mucosal h | Inflamed | HSPA5     | protein_cc | chr9  | 1.28E+08 | 1.28E+08 | - | 3908  | 24317.06 | 0        | -0.38992 | 0.167612 | -2.32632 | 0.02204  | 0.088047 | 1 |
| ENSG0000 | mucosal h | Inflamed | RPL29P24  | pseudoger  | chr12 | 1.21E+08 | 1.21E+08 | - | 453   | 5.568019 | 0.157518 | 0.421879 | 0.181359 | 2.326203 | 0.022047 | 0.08806  | 1 |
| ENSG0000 | mucosal h | Inflamed | AC007566  | antisense  | chr7  | 92086878 | 92120924 | + | 701   | 26.61575 | 0.052506 | 0.621478 | 0.267179 | 2.326078 | 0.022054 | 0.088074 | 1 |
| ENSG0000 | mucosal h | Inflamed | TEX38     | protein_cc | chr1  | 47134527 | 47139266 | + | 1545  | 0.914081 | 0.75179  | 0.254845 | 0.109563 | 2.326004 | 0.022058 | 0.088077 | 1 |
| ENSG0000 | mucosal h | Inflamed | RP5-894A1 | sense_intr | chr7  | 1.41E+08 | 1.41E+08 | - | 925   | 106.8258 | 0.004773 | 0.511024 | 0.219734 | 2.325647 | 0.022078 | 0.088143 | 1 |
| ENSG0000 | mucosal h | Inflamed | MS4A8     | protein_cc | chr11 | 60467047 | 60483284 | + | 2583  | 592.1957 | 0.00716  | 0.761958 | 0.327655 | 2.325492 | 0.022086 | 0.088164 | 1 |
| ENSG0000 | mucosal h | Inflamed | WAC-AS1   | antisense  | chr10 | 28811581 | 28821672 | - | 2943  | 489.1838 | 0        | 0.374609 | 0.161122 | 2.324998 | 0.022114 | 0.088261 | 1 |
| ENSG0000 | mucosal h | Inflamed | LINC00501 | lincRNA    | chr3  | 1.77E+08 | 1.77E+08 | + | 2046  | 26.98329 | 0.026253 | 0.613056 | 0.263715 | 2.324696 | 0.022131 | 0.088315 | 1 |
| ENSG0000 | mucosal h | Inflamed | RP11-455F | antisense  | chr16 | 30107751 | 30115437 | + | 1650  | 24.50119 | 0        | -0.46185 | 0.198694 | -2.32441 | 0.022147 | 0.088364 | 1 |
| ENSG0000 | mucosal h | Inflamed | SNORA60   | snoRNA     | chr20 | 37078013 | 37078146 | + | 134   | 4.670644 | 0.205251 | 0.412362 | 0.177419 | 2.324225 | 0.022157 | 0.088393 | 1 |
| ENSG0000 | mucosal h | Inflamed | ZFYVE28   | protein_cc | chr4  | 2271309  | 2420390  | - | 9624  | 1312.597 | 0        | 0.322384 | 0.138732 | 2.323789 | 0.022181 | 0.088468 | 1 |
| ENSG0000 | mucosal h | Inflamed | METTL18   | protein_cc | chr1  | 1.7E+08  | 1.7E+08  | - | 1578  | 136.6587 | 0        | 0.344291 | 0.148161 | 2.323768 | 0.022183 | 0.088468 | 1 |
| ENSG0000 | mucosal h | Inflamed | CDCA4     | protein_cc | chr14 | 1.05E+08 | 1.05E+08 | - | 2513  | 405.389  | 0        | -0.24666 | 0.106155 | -2.32359 | 0.022193 | 0.088483 | 1 |
| ENSG0000 | mucosal h | Inflamed | PFKP      | protein_cc | chr10 | 3108525  | 3179904  | + | 4827  | 6112.334 | 0        | -0.28166 | 0.121216 | -2.32358 | 0.022193 | 0.088483 | 1 |
| ENSG0000 | mucosal h | Inflamed | RP11-361L | processed  | chr16 | 66976615 | 66997159 | + | 317   | 0.990453 | 0.76611  | 0.207459 | 0.089286 | 2.323519 | 0.022197 | 0.088483 | 1 |
| ENSG0000 | mucosal h | Inflamed | EMP2      | protein_cc | chr16 | 10622279 | 10674555 | - | 8718  | 5082.048 | 0        | 0.260134 | 0.111961 | 2.323423 | 0.022202 | 0.088491 | 1 |
| ENSG0000 | mucosal h | Inflamed | RP6-74O6  | lincRNA    | chr1  | 1.48E+08 | 1.48E+08 | - | 442   | 4.706444 | 0.202864 | 0.407937 | 0.175598 | 2.323128 | 0.022218 | 0.088533 | 1 |
| ENSG0000 | mucosal h | Inflamed | CFL1P6    | pseudoger  | chr1  | 11051035 | 11051854 | - | 494   | 1.52506  | 0.622912 | 0.329922 | 0.14202  | 2.323067 | 0.022222 | 0.088533 | 1 |
| ENSG0000 | mucosal h | Inflamed | RP11-392F | antisense  | chr12 | 13080660 | 13137579 | + | 3416  | 81.61575 | 0        | 0.433193 | 0.186476 | 2.323056 | 0.022222 | 0.088533 | 1 |
| ENSG0000 | mucosal h | Inflamed | SHC3      | protein_cc | chr9  | 91628060 | 91793682 | - | 2555  | 45.21718 | 0.033413 | -0.92325 | 0.397461 | -2.32287 | 0.022233 | 0.088551 | 1 |
| ENSG0000 | mucosal h | Inflamed | HN1L      | protein_cc | chr16 | 1728257  | 1752281  | + | 4768  | 3270.621 | 0        | 0.221228 | 0.09524  | 2.322839 | 0.022235 | 0.088551 | 1 |
| ENSG0000 | mucosal h | Inflamed | RP11-182I | lincRNA    | chr1  | 65437908 | 65468159 | - | 4326  | 11.11695 | 0.119332 | 0.587946 | 0.25312  | 2.322792 | 0.022237 | 0.088551 | 1 |
| ENSG0000 | mucosal h | Inflamed | ING4      | protein_cc | chr12 | 6759446  | 6772314  | - | 2736  | 605.9499 | 0        | 0.213181 | 0.091786 | 2.322582 | 0.022249 | 0.088585 | 1 |
| ENSG0000 | mucosal h | Inflamed | LDHAP4    | pseudoger  | chr9  | 14921335 | 14922332 | - | 998   | 138.3079 | 0.004773 | -0.44984 | 0.193705 | -2.32228 | 0.022266 | 0.088638 | 1 |
| ENSG0000 | mucosal h | Inflamed | RP11-285A | lincRNA    | chr15 | 78433585 | 78435515 | + | 1931  | 5.603819 | 0.193317 | 0.453376 | 0.195243 | 2.322113 | 0.022275 | 0.088638 | 1 |
| ENSG0000 | mucosal h | Inflamed | RP11-466F | lincRNA    | chr5  | 75627662 | 75629781 | + | 2120  | 5.27685  | 0.27685  | 0.507439 | 0.218525 | 2.322111 | 0.022275 | 0.088638 | 1 |
| ENSG0000 | mucosal h | Inflamed | IGKV1D-37 | IG_V_gene  | chr2  | 89923550 | 89924026 | + | 353   | 0.928401 | 0.799523 | -0.367   | 0.158046 | -2.3221  | 0.022276 | 0.088638 | 1 |
| ENSG0000 | mucosal h | Inflamed | SIPA1L3   | protein_cc | chr19 | 38397868 | 38699012 | + | 10335 | 6235.675 | 0        | 0.406228 | 0.17495  | 2.32197  | 0.022283 | 0.08865  | 1 |
| ENSG0000 | mucosal h | Inflamed | SNORA16E  | snoRNA     | chr1  | 2.13E+08 | 2.13E+08 | + | 135   | 1.553699 | 0.606205 | 0.345233 | 0.148685 | 2.321906 | 0.022287 | 0.08865  | 1 |
| ENSG0000 | mucosal h | Inflamed | RN7SL441  | misc_RNA   | chr12 | 1.1E+08  | 1.1E+08  | - | 294   | 1.599045 | 0.594272 | 0.327008 | 0.14084  | 2.321843 | 0.02229  | 0.08865  | 1 |
| ENSG0000 | mucosal h | Inflamed | KRCC1     | protein_cc | chr2  | 88326724 | 88355248 | - | 1753  | 1297.074 | 0        | 0.388673 | 0.167401 | 2.32181  | 0.022292 | 0.08865  | 1 |
| ENSG0000 | mucosal h | Inflamed | CCL13     | protein_cc | chr17 | 32683471 | 32685629 | + | 851   | 318.21   | 0        | -0.74691 | 0.321745 | -2.32142 | 0.022314 | 0.088723 | 1 |
| ENSG0000 | mucosal h | Inflamed | SNAP29    | protein_cc | chr22 | 21213271 | 21245506 | + | 4953  | 1678.368 | 0        | 0.179603 | 0.077371 | 2.321315 | 0.02232  | 0.088726 | 1 |
| ENSG0000 | mucosal h | Inflamed | TMEM242   | protein_cc | chr6  | 1.58E+08 | 1.58E+08 | - | 4644  | 421.8091 | 0        | 0.272573 | 0.117423 | 2.321292 | 0.022321 | 0.088726 | 1 |
| ENSG0000 | mucosal h | Inflamed | LPCAT3    | protein_cc | chr12 | 7085348  | 7125814  | - | 4724  | 3547.103 | 0        | 0.29056  | 0.12518  | 2.321139 | 0.02233  | 0.088746 | 1 |
| ENSG0000 | mucosal h | Inflamed | IGDCC4    | protein_cc | chr15 | 65673802 | 65715410 | - | 7764  | 829.7279 | 0.002387 | -0.64001 | 0.275768 | -2.32084 | 0.022347 | 0.088795 | 1 |
| ENSG0000 | mucosal h | Inflamed | ZBTB42    | protein_cc | chr14 | 1.05E+08 | 1.05E+08 | + | 3905  | 706.7041 | 0        | 0.235885 | 0.101641 | 2.320779 | 0.02235  | 0.088795 | 1 |
| ENSG0000 | mucosal h | Inflamed | ZFP3      | protein_cc | chr17 | 4981543  | 4999669  | + | 5206  | 518.9451 | 0.002387 | 0.59435  | 0.256104 | 2.32074  | 0.022353 | 0.088795 | 1 |
| ENSG0000 | mucosal h | Inflamed | CTD-2574I | antisense  | chr16 | 29938157 | 29940254 | + | 1762  | 24.72554 | 0.031026 | 0.409229 | 0.176355 | 2.320489 | 0.022367 | 0.088838 | 1 |
| ENSG0000 | mucosal h | Inflamed | CARNS1    | protein_cc | chr11 | 67182439 | 67193078 | + | 5670  | 74.26969 | 0        | -0.4393  | 0.18934  | -2.32018 | 0.022384 | 0.088894 | 1 |

|          |           |          |           |            |       |          |          |   |       |          |          |          |          |          |          |          |   |
|----------|-----------|----------|-----------|------------|-------|----------|----------|---|-------|----------|----------|----------|----------|----------|----------|----------|---|
| ENSG0000 | mucosal h | Inflamed | LINC00092 | lincRNA    | chr9  | 98782014 | 98790247 | - | 2306  | 37.62053 | 0.009547 | 0.591471 | 0.254972 | 2.319746 | 0.022409 | 0.088978 | 1 |
| ENSG0000 | mucosal h | Inflamed | STAG3L1   | pseudoger  | chr7  | 74988448 | 75024657 | + | 2917  | 47.30072 | 0.026253 | 0.485005 | 0.209097 | 2.319522 | 0.022421 | 0.089014 | 1 |
| ENSG0000 | mucosal h | Inflamed | RP11-7671 | sense_intr | chr1  | 46160356 | 46162747 | - | 598   | 40.20286 | 0.011933 | 0.44791  | 0.193111 | 2.319447 | 0.022425 | 0.089018 | 1 |
| ENSG0000 | mucosal h | Inflamed | MT-TN     | Mt_tRNA    | chrM  | 5657     | 5729     | - | 73    | 2.48926  | 0.431981 | 0.361537 | 0.15591  | 2.318873 | 0.022458 | 0.089133 | 1 |
| ENSG0000 | mucosal h | Inflamed | SRP68     | protein_cc | chr17 | 74035184 | 74068734 | - | 7313  | 2740.57  | 0        | -0.21536 | 0.092877 | -2.31877 | 0.022463 | 0.089142 | 1 |
| ENSG0000 | mucosal h | Inflamed | DHRS3     | protein_cc | chr1  | 12627939 | 12677737 | - | 3037  | 2047.425 | 0        | 0.318166 | 0.137217 | 2.318708 | 0.022467 | 0.089142 | 1 |
| ENSG0000 | mucosal h | Inflamed | RP11-2531 | antisense  | chr15 | 69689243 | 69707368 | - | 2265  | 9.608592 | 0.095465 | -0.55395 | 0.238911 | -2.31865 | 0.02247  | 0.089142 | 1 |
| ENSG0000 | mucosal h | Inflamed | RP11-175C | antisense  | chr10 | 98752207 | 98755716 | + | 3510  | 422.0859 | 0        | 0.528291 | 0.227946 | 2.317609 | 0.022529 | 0.089363 | 1 |
| ENSG0000 | mucosal h | Inflamed | S1PR3     | protein_cc | chr9  | 91606362 | 91619925 | + | 8754  | 506.0072 | 0.002387 | -0.67502 | 0.291305 | -2.31722 | 0.022552 | 0.089426 | 1 |
| ENSG0000 | mucosal h | Inflamed | COL3A1    | protein_cc | chr2  | 1.9E+08  | 1.9E+08  | + | 6816  | 77694.9  | 0        | -0.59379 | 0.256252 | -2.31721 | 0.022552 | 0.089426 | 1 |
| ENSG0000 | mucosal h | Inflamed | CTB-102L5 | sense_intr | chr19 | 38675016 | 38676905 | + | 1890  | 7.384248 | 0.140811 | 0.488699 | 0.210907 | 2.317131 | 0.022556 | 0.08943  | 1 |
| ENSG0000 | mucosal h | Inflamed | RP4-669H2 | antisense  | chr20 | 52014199 | 52029448 | - | 3280  | 4.236277 | 0.377088 | 0.480253 | 0.207282 | 2.316906 | 0.022569 | 0.089467 | 1 |
| ENSG0000 | mucosal h | Inflamed | RPE65     | protein_cc | chr1  | 68894505 | 68915642 | - | 2610  | 3.405728 | 0.350835 | 0.460474 | 0.198796 | 2.316322 | 0.022602 | 0.089569 | 1 |
| ENSG0000 | mucosal h | Inflamed | ZNF681    | protein_cc | chr19 | 23921997 | 23941693 | - | 6497  | 103.8807 | 0.002387 | 0.543755 | 0.234751 | 2.3163   | 0.022604 | 0.089569 | 1 |
| ENSG0000 | mucosal h | Inflamed | RP11-153k | lincRNA    | chr10 | 69993008 | 70002136 | - | 561   | 2.186158 | 0.644391 | 0.309858 | 0.133774 | 2.316275 | 0.022605 | 0.089569 | 1 |
| ENSG0000 | mucosal h | Inflamed | SGTB      | protein_cc | chr5  | 64961755 | 65018862 | - | 5748  | 191.3604 | 0        | -0.54231 | 0.234147 | -2.31612 | 0.022614 | 0.08958  | 1 |
| ENSG0000 | mucosal h | Inflamed | HIBCH     | protein_cc | chr2  | 1.91E+08 | 1.91E+08 | - | 7438  | 923.2554 | 0        | 0.39459  | 0.170369 | 2.316087 | 0.022616 | 0.08958  | 1 |
| ENSG0000 | mucosal h | Inflamed | RP3-510D2 | lincRNA    | chr1  | 92422263 | 9252148  | + | 985   | 13.65632 | 0.038186 | -0.42537 | 0.183664 | -2.31605 | 0.022618 | 0.08958  | 1 |
| ENSG0000 | mucosal h | Inflamed | ADAT3     | protein_cc | chr19 | 1905377  | 1913444  | + | 2235  | 370.8663 | 0        | 0.280426 | 0.121093 | 2.315787 | 0.022633 | 0.089625 | 1 |
| ENSG0000 | mucosal h | Inflamed | AC004066  | pseudoger  | chr4  | 1.06E+08 | 1.06E+08 | - | 802   | 0.928401 | 0.747017 | 0.263031 | 0.113619 | 2.315031 | 0.022676 | 0.089782 | 1 |
| ENSG0000 | mucosal h | Inflamed | TUSC1     | protein_cc | chr9  | 25676396 | 25678856 | - | 2461  | 534.358  | 0        | 0.277494 | 0.119882 | 2.314717 | 0.022694 | 0.089835 | 1 |
| ENSG0000 | mucosal h | Inflamed | RP11-755F | antisense  | chr11 | 66027038 | 66029305 | - | 539   | 4.02864  | 0.324582 | 0.419558 | 0.18126  | 2.314677 | 0.022696 | 0.089835 | 1 |
| ENSG0000 | mucosal h | Inflamed | CYP4F2    | protein_cc | chr19 | 15988833 | 16008930 | - | 2998  | 252.3389 | 0.023866 | 1.031323 | 0.445584 | 2.314541 | 0.022704 | 0.089852 | 1 |
| ENSG0000 | mucosal h | Inflamed | LSG1      | protein_cc | chr3  | 1.94E+08 | 1.94E+08 | - | 4818  | 1445.117 | 0        | 0.354509 | 0.153173 | 2.314429 | 0.02271  | 0.089864 | 1 |
| ENSG0000 | mucosal h | Inflamed | RNF25     | protein_cc | chr2  | 2.2E+08  | 2.2E+08  | - | 2323  | 503.3699 | 0        | -0.16684 | 0.072089 | -2.31436 | 0.022714 | 0.089865 | 1 |
| ENSG0000 | mucosal h | Inflamed | SFMBT1    | protein_cc | chr3  | 52937588 | 53080766 | - | 5676  | 727.9379 | 0        | 0.34344  | 0.148415 | 2.314047 | 0.022732 | 0.089923 | 1 |
| ENSG0000 | mucosal h | Inflamed | TMTC1     | protein_cc | chr12 | 29653773 | 29937692 | - | 14636 | 627.6205 | 0        | -0.63001 | 0.272291 | -2.31373 | 0.02275  | 0.089979 | 1 |
| ENSG0000 | mucosal h | Inflamed | MRPS30    | protein_cc | chr5  | 44809027 | 44820530 | + | 6202  | 935.0382 | 0        | 0.255311 | 0.110348 | 2.313681 | 0.022753 | 0.089979 | 1 |
| ENSG0000 | mucosal h | Inflamed | ST3GALS5  | protein_cc | chr2  | 86066267 | 86116137 | - | 5701  | 456.253  | 0        | -0.49276 | 0.213003 | -2.31338 | 0.02277  | 0.09002  | 1 |
| ENSG0000 | mucosal h | Inflamed | ZNF385A   | protein_cc | chr12 | 54762917 | 54785082 | - | 3179  | 1027.119 | 0        | -0.45212 | 0.195444 | -2.31328 | 0.022776 | 0.09002  | 1 |
| ENSG0000 | mucosal h | Inflamed | RP11-179A | lincRNA    | chr11 | 11139401 | 11205158 | + | 1833  | 8.050119 | 0.155131 | -0.53621 | 0.231798 | -2.31327 | 0.022777 | 0.09002  | 1 |
| ENSG0000 | mucosal h | Inflamed | CYP27A1   | protein_cc | chr2  | 2.2E+08  | 2.2E+08  | + | 2983  | 1570.029 | 0        | 0.386809 | 0.167214 | 2.313261 | 0.022777 | 0.09002  | 1 |
| ENSG0000 | mucosal h | Inflamed | SMAGP     | protein_cc | chr12 | 51638342 | 51664674 | - | 3558  | 2377.733 | 0        | 0.314161 | 0.135815 | 2.313153 | 0.022783 | 0.090025 | 1 |
| ENSG0000 | mucosal h | Inflamed | LRRC43    | protein_cc | chr12 | 1.23E+08 | 1.23E+08 | + | 2775  | 7.281623 | 0.042959 | -0.38715 | 0.167372 | -2.31312 | 0.022785 | 0.090025 | 1 |
| ENSG0000 | mucosal h | Inflamed | RAB30     | protein_cc | chr11 | 82684175 | 82782965 | - | 11701 | 717.3007 | 0        | -0.48434 | 0.209398 | -2.313   | 0.022792 | 0.090034 | 1 |
| ENSG0000 | mucosal h | Inflamed | GNA12     | protein_cc | chr7  | 2767746  | 2883958  | - | 6120  | 2952.974 | 0        | -0.29178 | 0.12615  | -2.31296 | 0.022794 | 0.090034 | 1 |
| ENSG0000 | mucosal h | Inflamed | TRIM13    | protein_cc | chr13 | 50570024 | 50594617 | + | 8080  | 853.21   | 0        | 0.373914 | 0.161678 | 2.312717 | 0.022808 | 0.090075 | 1 |
| ENSG0000 | mucosal h | Inflamed | MAZ       | protein_cc | chr16 | 29817427 | 29823649 | + | 4038  | 10068.44 | 0        | 0.238771 | 0.103253 | 2.312485 | 0.022822 | 0.090111 | 1 |
| ENSG0000 | mucosal h | Inflamed | RNF44     | protein_cc | chr5  | 1.76E+08 | 1.76E+08 | - | 5660  | 3646.852 | 0        | 0.345886 | 0.149576 | 2.312439 | 0.022824 | 0.090111 | 1 |
| ENSG0000 | mucosal h | Inflamed | CTB-60B18 | lincRNA    | chr19 | 49521504 | 49522741 | - | 493   | 2.446301 | 0.477327 | -0.39664 | 0.171538 | -2.31226 | 0.022835 | 0.090139 | 1 |

|          |           |          |           |                  |          |          |   |      |          |          |          |          |          |          |          |   |
|----------|-----------|----------|-----------|------------------|----------|----------|---|------|----------|----------|----------|----------|----------|----------|----------|---|
| ENSG0000 | mucosal h | Inflamed | TMEFF2    | protein_cc chr2  | 1.93E+08 | 1.93E+08 | - | 6632 | 6.229117 | 0.377088 | 0.690632 | 0.298706 | 2.312079 | 0.022845 | 0.090165 | 1 |
| ENSG0000 | mucosal h | Inflamed | GRSF1     | protein_cc chr4  | 71681499 | 71705662 | - | 7785 | 3542.105 | 0        | 0.266096 | 0.115105 | 2.311766 | 0.022863 | 0.090223 | 1 |
| ENSG0000 | mucosal h | Inflamed | LRR8D     | protein_cc chr1  | 90286573 | 90402170 | + | 4852 | 1112.833 | 0        | 0.372736 | 0.161243 | 2.311638 | 0.02287  | 0.090234 | 1 |
| ENSG0000 | mucosal h | Inflamed | AC002116  | antisense chr19  | 36505410 | 36536874 | + | 643  | 11.97852 | 0.016706 | 0.357077 | 0.154478 | 2.3115   | 0.022878 | 0.090234 | 1 |
| ENSG0000 | mucosal h | Inflamed | FLVCR1    | protein_cc chr1  | 2.13E+08 | 2.13E+08 | + | 6442 | 572.9785 | 0        | 0.42703  | 0.184743 | 2.311479 | 0.022879 | 0.090234 | 1 |
| ENSG0000 | mucosal h | Inflamed | ZNF334    | protein_cc chr20 | 45129701 | 45142198 | - | 5286 | 60.33413 | 0.019093 | 0.63633  | 0.275291 | 2.311476 | 0.022879 | 0.090234 | 1 |
| ENSG0000 | mucosal h | Inflamed | TPGS2     | protein_cc chr18 | 34359987 | 34409158 | - | 8082 | 1441.174 | 0        | -0.19405 | 0.083957 | -2.31135 | 0.022887 | 0.090248 | 1 |
| ENSG0000 | mucosal h | Inflamed | PARP9     | protein_cc chr3  | 1.22E+08 | 1.22E+08 | - | 8938 | 2620.609 | 0        | -0.51266 | 0.221821 | -2.31116 | 0.022898 | 0.090262 | 1 |
| ENSG0000 | mucosal h | Inflamed | SLC6A19   | protein_cc chr5  | 1201710  | 1225232  | + | 5276 | 1402.387 | 0.038186 | 1.475875 | 0.638592 | 2.311138 | 0.022899 | 0.090262 | 1 |
| ENSG0000 | mucosal h | Inflamed | 08-Mar    | protein_cc chr10 | 45950035 | 46090354 | - | 7537 | 3106.379 | 0        | 0.250943 | 0.108583 | 2.311068 | 0.022903 | 0.090262 | 1 |
| ENSG0000 | mucosal h | Inflamed | UNC119    | protein_cc chr17 | 26873725 | 26879686 | - | 5128 | 1181.8   | 0        | -0.24856 | 0.107553 | -2.31105 | 0.022904 | 0.090262 | 1 |
| ENSG0000 | mucosal h | Inflamed | GLTPD1    | protein_cc chr1  | 1260136  | 1264277  | + | 2556 | 2895.107 | 0        | 0.251361 | 0.108772 | 2.310902 | 0.022913 | 0.090283 | 1 |
| ENSG0000 | mucosal h | Inflamed | PSTPIP1   | protein_cc chr15 | 77285700 | 77329673 | + | 4468 | 393.8544 | 0.002387 | -0.46406 | 0.200823 | -2.31081 | 0.022918 | 0.090286 | 1 |
| ENSG0000 | mucosal h | Inflamed | C1orf106  | protein_cc chr1  | 2.01E+08 | 2.01E+08 | + | 5413 | 6366.816 | 0        | 0.590945 | 0.255735 | 2.310768 | 0.02292  | 0.090286 | 1 |
| ENSG0000 | mucosal h | Inflamed | CEBPG     | protein_cc chr19 | 33864236 | 33873592 | + | 4411 | 2857.308 | 0        | 0.399459 | 0.172883 | 2.310568 | 0.022932 | 0.090316 | 1 |
| ENSG0000 | mucosal h | Inflamed | ALOXE3    | protein_cc chr17 | 7999218  | 8022365  | - | 3760 | 3.100239 | 0.46778  | -0.55407 | 0.239801 | -2.31052 | 0.022935 | 0.090316 | 1 |
| ENSG0000 | mucosal h | Inflamed | PLXNC1    | protein_cc chr12 | 94542499 | 94701451 | + | 9887 | 1259.842 | 0        | -0.5609  | 0.242766 | -2.31045 | 0.022938 | 0.090317 | 1 |
| ENSG0000 | mucosal h | Inflamed | CD5       | protein_cc chr11 | 60869867 | 60895324 | + | 3221 | 677.0644 | 0        | -0.48778 | 0.211147 | -2.31015 | 0.022956 | 0.090354 | 1 |
| ENSG0000 | mucosal h | Inflamed | FAM71E1   | protein_cc chr19 | 50970042 | 50980010 | - | 1566 | 47.27446 | 0        | 0.310562 | 0.134438 | 2.310085 | 0.02296  | 0.090354 | 1 |
| ENSG0000 | mucosal h | Inflamed | LL21NC02  | antisense chr21  | 46356218 | 46356869 | + | 652  | 12.12649 | 0.143198 | -0.62512 | 0.270605 | -2.31007 | 0.02296  | 0.090354 | 1 |
| ENSG0000 | mucosal h | Inflamed | CTNS      | protein_cc chr17 | 3539762  | 3564836  | + | 3398 | 788.0692 | 0        | -0.19521 | 0.084509 | -2.30991 | 0.02297  | 0.090354 | 1 |
| ENSG0000 | mucosal h | Inflamed | ASIP      | protein_cc chr20 | 32782375 | 32857150 | + | 778  | 2.140811 | 0.484487 | -0.29701 | 0.128581 | -2.3099  | 0.02297  | 0.090354 | 1 |
| ENSG0000 | mucosal h | Inflamed | MAP3K6    | protein_cc chr1  | 27681675 | 27693383 | - | 4951 | 1519.129 | 0        | -0.34058 | 0.147442 | -2.30989 | 0.022971 | 0.090354 | 1 |
| ENSG0000 | mucosal h | Inflamed | IER5L     | protein_cc chr9  | 1.32E+08 | 1.32E+08 | - | 2706 | 591.3103 | 0        | -0.38746 | 0.167742 | -2.30987 | 0.022972 | 0.090354 | 1 |
| ENSG0000 | mucosal h | Inflamed | RP11-84C1 | lincRNA chr4     | 90040435 | 90041022 | + | 588  | 4.926014 | 0.162291 | 0.424341 | 0.183723 | 2.309678 | 0.022983 | 0.090378 | 1 |
| ENSG0000 | mucosal h | Inflamed | GTF2H2B   | pseudoger chr5   | 69711179 | 69743885 | + | 4028 | 30.63484 | 0.057279 | 0.502858 | 0.217721 | 2.309647 | 0.022985 | 0.090378 | 1 |
| ENSG0000 | mucosal h | Inflamed | EEF1A1P3  | pseudoger chrX   | 1.19E+08 | 1.19E+08 | - | 1335 | 2.990453 | 0.338902 | 0.392319 | 0.169876 | 2.309447 | 0.022996 | 0.09041  | 1 |
| ENSG0000 | mucosal h | Inflamed | PLBD2     | protein_cc chr12 | 1.14E+08 | 1.14E+08 | + | 3033 | 1733.272 | 0        | -0.3336  | 0.144457 | -2.30935 | 0.023002 | 0.090419 | 1 |
| ENSG0000 | mucosal h | Inflamed | LAMTOR3   | protein_cc chr4  | 1.01E+08 | 1.01E+08 | - | 4226 | 1017.053 | 0        | 0.321603 | 0.139291 | 2.308852 | 0.023031 | 0.090518 | 1 |
| ENSG0000 | mucosal h | Inflamed | ZNF799    | protein_cc chr19 | 12500830 | 12512085 | - | 5055 | 143.8568 | 0.004773 | 0.562066 | 0.243501 | 2.308272 | 0.023064 | 0.090636 | 1 |
| ENSG0000 | mucosal h | Inflamed | NPAS3     | protein_cc chr14 | 33404139 | 34273382 | + | 9241 | 32.04773 | 0.033413 | 0.484263 | 0.2098   | 2.308217 | 0.023067 | 0.090636 | 1 |
| ENSG0000 | mucosal h | Inflamed | AXIN1     | protein_cc chr16 | 337440   | 402673   | - | 7487 | 2666.621 | 0        | 0.259412 | 0.112391 | 2.308123 | 0.023073 | 0.090644 | 1 |
| ENSG0000 | mucosal h | Inflamed | ARHGEF11  | protein_cc chr1  | 1.57E+08 | 1.57E+08 | - | 9392 | 4441.117 | 0        | 0.309665 | 0.134182 | 2.307802 | 0.023092 | 0.090703 | 1 |
| ENSG0000 | mucosal h | Inflamed | HTR4-IT1  | sense_intr chr5  | 1.48E+08 | 1.48E+08 | - | 1704 | 1.947494 | 0.587112 | 0.414406 | 0.179572 | 2.307744 | 0.023095 | 0.090703 | 1 |
| ENSG0000 | mucosal h | Inflamed | CYC1      | protein_cc chr8  | 1.45E+08 | 1.45E+08 | + | 1975 | 5648.033 | 0        | 0.254271 | 0.1102   | 2.307361 | 0.023117 | 0.090774 | 1 |
| ENSG0000 | mucosal h | Inflamed | RP11-21A7 | antisense chr11  | 63885744 | 63886682 | - | 575  | 8.305489 | 0.085919 | 0.433343 | 0.187813 | 2.307313 | 0.02312  | 0.090774 | 1 |
| ENSG0000 | mucosal h | Inflamed | TGM3      | protein_cc chr20 | 2276647  | 2321724  | + | 2693 | 43.92363 | 0.004773 | 0.588263 | 0.255004 | 2.306876 | 0.023145 | 0.09086  | 1 |
| ENSG0000 | mucosal h | Inflamed | RP11-245J | lincRNA chr3     | 63993758 | 63994368 | - | 611  | 1.930788 | 0.5179   | 0.35934  | 0.15578  | 2.306716 | 0.023154 | 0.09087  | 1 |
| ENSG0000 | mucosal h | Inflamed | RTKN      | protein_cc chr2  | 74652963 | 74669549 | - | 5005 | 1403.053 | 0        | 0.296094 | 0.128362 | 2.306711 | 0.023155 | 0.09087  | 1 |
| ENSG0000 | mucosal h | Inflamed | SIX2      | protein_cc chr2  | 45232300 | 45236569 | - | 2205 | 7.749403 | 0.245823 | -0.68278 | 0.296054 | -2.30626 | 0.023181 | 0.090945 | 1 |

|          |           |          |            |            |       |          |          |   |       |          |          |          |          |          |          |          |   |
|----------|-----------|----------|------------|------------|-------|----------|----------|---|-------|----------|----------|----------|----------|----------|----------|----------|---|
| ENSG0000 | mucosal h | Inflamed | IGFN1      | protein_cc | chr1  | 2.01E+08 | 2.01E+08 | + | 12116 | 23.65632 | 0.193317 | 0.899257 | 0.389925 | 2.306232 | 0.023183 | 0.090945 | 1 |
| ENSG0000 | mucosal h | Inflamed | RP4-647C1  | antisense  | chr14 | 73738890 | 73740789 | - | 777   | 21.72315 | 0.019093 | 0.504532 | 0.218771 | 2.306205 | 0.023184 | 0.090945 | 1 |
| ENSG0000 | mucosal h | Inflamed | NCMAP      | protein_cc | chr1  | 24882602 | 24935819 | + | 4122  | 118.8783 | 0        | -0.46888 | 0.203345 | -2.30583 | 0.023206 | 0.091016 | 1 |
| ENSG0000 | mucosal h | Inflamed | MAGED1     | protein_cc | chrX  | 51546103 | 51645453 | + | 6016  | 6151.752 | 0        | -0.26746 | 0.115998 | -2.30573 | 0.023212 | 0.091025 | 1 |
| ENSG0000 | mucosal h | Inflamed | RP4-549L2  | antisense  | chr1  | 1.01E+08 | 1.01E+08 | + | 429   | 8.023866 | 0.042959 | 0.394567 | 0.17118  | 2.304987 | 0.023255 | 0.091182 | 1 |
| ENSG0000 | mucosal h | Inflamed | FSD1       | protein_cc | chr19 | 4304597  | 4323840  | + | 3111  | 45.52029 | 0.002387 | -0.41909 | 0.181849 | -2.30458 | 0.023279 | 0.091261 | 1 |
| ENSG0000 | mucosal h | Inflamed | HUG1       | protein_cc | chr10 | 1.03E+08 | 1.03E+08 | + | 1089  | 2.770883 | 0.486874 | 0.445125 | 0.19316  | 2.304432 | 0.023287 | 0.091282 | 1 |
| ENSG0000 | mucosal h | Inflamed | RP11-104J  | lincRNA    | chr17 | 34339544 | 34339931 | + | 388   | 1.367542 | 0.642005 | 0.311869 | 0.135358 | 2.304027 | 0.023311 | 0.091361 | 1 |
| ENSG0000 | mucosal h | Inflamed | ZNF514     | protein_cc | chr2  | 95813075 | 95831158 | - | 6813  | 571.2506 | 0        | 0.526123 | 0.228368 | 2.303839 | 0.023322 | 0.09139  | 1 |
| ENSG0000 | mucosal h | Inflamed | PDLIM4     | protein_cc | chr5  | 1.32E+08 | 1.32E+08 | + | 3192  | 557.9785 | 0        | -0.58187 | 0.252617 | -2.30336 | 0.02335  | 0.091483 | 1 |
| ENSG0000 | mucosal h | Inflamed | ARFGAP3    | protein_cc | chr22 | 43192508 | 43254112 | - | 3381  | 2192.253 | 0        | -0.43069 | 0.186987 | -2.30332 | 0.023353 | 0.091483 | 1 |
| ENSG0000 | mucosal h | Inflamed | hsa-mir-11 | protein_cc | chr19 | 14183348 | 14185874 | + | 2252  | 1010.255 | 0        | 0.383678 | 0.166585 | 2.303193 | 0.02336  | 0.09149  | 1 |
| ENSG0000 | mucosal h | Inflamed | NUDT11     | protein_cc | chrX  | 51232863 | 51239448 | - | 2385  | 22.85919 | 0.016706 | -0.47783 | 0.207466 | -2.30316 | 0.023362 | 0.09149  | 1 |
| ENSG0000 | mucosal h | Inflamed | NAT14      | protein_cc | chr19 | 55996371 | 55998935 | + | 2163  | 198.4869 | 0        | -0.38669 | 0.167898 | -2.30311 | 0.023365 | 0.09149  | 1 |
| ENSG0000 | mucosal h | Inflamed | RP11-15N   | sense_ove  | chr3  | 99898411 | 99900574 | + | 2164  | 4.50358  | 0.217184 | 0.464388 | 0.201657 | 2.302867 | 0.023379 | 0.09152  | 1 |
| ENSG0000 | mucosal h | Inflamed | KCNG3      | protein_cc | chr2  | 42669157 | 42721237 | - | 3824  | 28.18377 | 0.040573 | 0.590461 | 0.256423 | 2.302682 | 0.02339  | 0.09152  | 1 |
| ENSG0000 | mucosal h | Inflamed | MGAM       | protein_cc | chr7  | 1.42E+08 | 1.42E+08 | + | 10767 | 642.1169 | 0.002387 | -0.9995  | 0.434061 | -2.30267 | 0.023391 | 0.09152  | 1 |
| ENSG0000 | mucosal h | Inflamed | SLC2A2     | protein_cc | chr3  | 1.71E+08 | 1.71E+08 | - | 3417  | 28.05012 | 0.553699 | -0.64211 | 0.278863 | -2.30261 | 0.023394 | 0.09152  | 1 |
| ENSG0000 | mucosal h | Inflamed | GOLPH3L    | protein_cc | chr1  | 1.51E+08 | 1.51E+08 | - | 3339  | 1937.723 | 0        | 0.35829  | 0.155604 | 2.302574 | 0.023396 | 0.09152  | 1 |
| ENSG0000 | mucosal h | Inflamed | LINC00959  | lincRNA    | chr10 | 1.32E+08 | 1.32E+08 | - | 2843  | 44.31265 | 0        | 0.310693 | 0.134933 | 2.302563 | 0.023397 | 0.09152  | 1 |
| ENSG0000 | mucosal h | Inflamed | ARF3       | protein_cc | chr12 | 49329506 | 49351334 | - | 5002  | 12605.73 | 0        | 0.284044 | 0.12336  | 2.302559 | 0.023397 | 0.09152  | 1 |
| ENSG0000 | mucosal h | Inflamed | AP001324   | pseudoger  | chr11 | 74409389 | 74409869 | - | 480   | 4.083532 | 0.546539 | -0.64891 | 0.281838 | -2.3024  | 0.023406 | 0.091543 | 1 |
| ENSG0000 | mucosal h | Inflamed | UBAC1      | protein_cc | chr9  | 1.39E+08 | 1.39E+08 | - | 2979  | 1523.661 | 0        | 0.161219 | 0.070026 | 2.302254 | 0.023415 | 0.091561 | 1 |
| ENSG0000 | mucosal h | Inflamed | RP11-466L  | lincRNA    | chr1  | 56046710 | 56200675 | + | 4063  | 0.868735 | 0.789976 | 0.309024 | 0.13423  | 2.302202 | 0.023418 | 0.091561 | 1 |
| ENSG0000 | mucosal h | Inflamed | IDS        | protein_cc | chrX  | 1.49E+08 | 1.49E+08 | - | 3311  | 29.179   | 0.064439 | 0.619058 | 0.268935 | 2.301893 | 0.023436 | 0.091617 | 1 |
| ENSG0000 | mucosal h | Inflamed | RP1-8B1.4  | antisense  | chr6  | 46064830 | 46097443 | - | 739   | 11.5537  | 0.026253 | 0.464848 | 0.201946 | 2.301839 | 0.023439 | 0.091617 | 1 |
| ENSG0000 | mucosal h | Inflamed | SPTBN2     | protein_cc | chr11 | 66452719 | 66496697 | - | 9131  | 589.7804 | 0        | -0.50921 | 0.221234 | -2.30169 | 0.023448 | 0.091638 | 1 |
| ENSG0000 | mucosal h | Inflamed | RP1-86D1   | sense_intr | chr6  | 1.29E+08 | 1.29E+08 | - | 1904  | 1.360382 | 0.653938 | 0.324898 | 0.141167 | 2.30152  | 0.023458 | 0.091663 | 1 |
| ENSG0000 | mucosal h | Inflamed | DERL2      | protein_cc | chr17 | 5374571  | 5390131  | - | 6386  | 1255.255 | 0        | -0.23513 | 0.102176 | -2.30118 | 0.023478 | 0.091728 | 1 |
| ENSG0000 | mucosal h | Inflamed | CDC42EP3   | protein_cc | chr2  | 37869032 | 37965611 | - | 10216 | 1164.819 | 0        | 0.336496 | 0.146252 | 2.300797 | 0.023501 | 0.091802 | 1 |
| ENSG0000 | mucosal h | Inflamed | TMEM125    | protein_cc | chr1  | 43735665 | 43739673 | + | 2127  | 1437.504 | 0        | 0.51593  | 0.224247 | 2.300723 | 0.023505 | 0.091806 | 1 |
| ENSG0000 | mucosal h | Inflamed | RP11-44F1  | lincRNA    | chr16 | 53407405 | 53418657 | + | 1106  | 36.84487 | 0.02148  | 0.456134 | 0.19831  | 2.300102 | 0.023541 | 0.091922 | 1 |
| ENSG0000 | mucosal h | Inflamed | DNASE1L1   | protein_cc | chrX  | 1.54E+08 | 1.54E+08 | - | 4130  | 1319.294 | 0        | -0.14202 | 0.061745 | -2.3001  | 0.023542 | 0.091922 | 1 |
| ENSG0000 | mucosal h | Inflamed | RP11-586L  | lincRNA    | chr4  | 6204055  | 6208376  | + | 4121  | 1        | 0.77327  | -0.36581 | 0.159062 | -2.29977 | 0.023561 | 0.091984 | 1 |
| ENSG0000 | mucosal h | Inflamed | AC002480   | antisense  | chr7  | 22629324 | 22631241 | + | 557   | 1.031026 | 0.718377 | -0.30457 | 0.132457 | -2.29939 | 0.023583 | 0.092058 | 1 |
| ENSG0000 | mucosal h | Inflamed | AC104809   | processed  | chr2  | 2.42E+08 | 2.42E+08 | - | 2656  | 19.00239 | 0.126492 | -0.77353 | 0.336559 | -2.29836 | 0.023644 | 0.092282 | 1 |
| ENSG0000 | mucosal h | Inflamed | ESM1       | protein_cc | chr5  | 54273692 | 54318499 | - | 2695  | 13.17184 | 0.190931 | -0.76202 | 0.33156  | -2.29829 | 0.023649 | 0.092284 | 1 |
| ENSG0000 | mucosal h | Inflamed | RP11-511F  | pseudoger  | chr12 | 1.02E+08 | 1.02E+08 | - | 642   | 2.878282 | 0.381862 | 0.400566 | 0.174305 | 2.298081 | 0.023661 | 0.092306 | 1 |
| ENSG0000 | mucosal h | Inflamed | ICK        | protein_cc | chr6  | 52866077 | 52926600 | - | 6259  | 935.136  | 0        | 0.459133 | 0.199795 | 2.298024 | 0.023664 | 0.092306 | 1 |
| ENSG0000 | mucosal h | Inflamed | NIPSNAP3   | protein_cc | chr9  | 1.08E+08 | 1.08E+08 | + | 2585  | 734.5776 | 0        | 0.312965 | 0.136189 | 2.298016 | 0.023665 | 0.092306 | 1 |

|          |           |          |           |            |       |          |          |   |       |          |          |          |          |          |          |          |   |
|----------|-----------|----------|-----------|------------|-------|----------|----------|---|-------|----------|----------|----------|----------|----------|----------|----------|---|
| ENSG0000 | mucosal h | Inflamed | RP11-217t | pseudoger  | chrX  | 79528830 | 79565669 | - | 500   | 2.608592 | 0.451074 | 0.405617 | 0.176536 | 2.297638 | 0.023687 | 0.09238  | 1 |
| ENSG0000 | mucosal h | Inflamed | NPR3      | protein_cc | chr5  | 32689176 | 32791819 | + | 9855  | 8.155131 | 0.121718 | 0.526361 | 0.229117 | 2.297348 | 0.023704 | 0.092433 | 1 |
| ENSG0000 | mucosal h | Inflamed | TMEM186   | protein_cc | chr16 | 8874241  | 8891505  | - | 1978  | 323.3389 | 0        | 0.178645 | 0.07777  | 2.297095 | 0.023719 | 0.092478 | 1 |
| ENSG0000 | mucosal h | Inflamed | EPB41L4A  | lincRNA    | chr5  | 1.11E+08 | 1.11E+08 | + | 3344  | 343.4988 | 0        | 0.249424 | 0.108593 | 2.296862 | 0.023733 | 0.092518 | 1 |
| ENSG0000 | mucosal h | Inflamed | SEMA6D    | protein_cc | chr15 | 47476298 | 48066420 | + | 8560  | 1519.795 | 0        | 0.595104 | 0.259115 | 2.296678 | 0.023744 | 0.092547 | 1 |
| ENSG0000 | mucosal h | Inflamed | MLPH      | protein_cc | chr2  | 2.38E+08 | 2.38E+08 | + | 7514  | 4384.217 | 0        | 0.40485  | 0.17629  | 2.296507 | 0.023754 | 0.092573 | 1 |
| ENSG0000 | mucosal h | Inflamed | TMCO6     | protein_cc | chr5  | 1.4E+08  | 1.4E+08  | + | 3502  | 473.2339 | 0        | 0.235572 | 0.102589 | 2.296265 | 0.023769 | 0.092615 | 1 |
| ENSG0000 | mucosal h | Inflamed | PLA2G2A   | protein_cc | chr1  | 20301925 | 20306932 | - | 1654  | 20639.56 | 0        | -0.7532  | 0.328045 | -2.29601 | 0.023784 | 0.09266  | 1 |
| ENSG0000 | mucosal h | Inflamed | IL5       | protein_cc | chr5  | 1.32E+08 | 1.32E+08 | - | 1587  | 2.453461 | 0.651551 | -0.53289 | 0.232114 | -2.29581 | 0.023796 | 0.092694 | 1 |
| ENSG0000 | mucosal h | Inflamed | CIDEB     | protein_cc | chr14 | 24774302 | 24780636 | - | 3198  | 795.7232 | 0        | -0.27201 | 0.118489 | -2.29569 | 0.023803 | 0.092695 | 1 |
| ENSG0000 | mucosal h | Inflamed | TRABD2B   | protein_cc | chr1  | 48226200 | 48462567 | - | 7034  | 193.821  | 0.002387 | -0.52821 | 0.23009  | -2.29568 | 0.023803 | 0.092695 | 1 |
| ENSG0000 | mucosal h | Inflamed | RD3       | protein_cc | chr1  | 2.12E+08 | 2.12E+08 | - | 4266  | 6.494033 | 0.188544 | -0.50019 | 0.217916 | -2.29531 | 0.023826 | 0.092769 | 1 |
| ENSG0000 | mucosal h | Inflamed | GFRA2     | protein_cc | chr8  | 21547915 | 21669869 | - | 5731  | 355.1241 | 0        | 0.457635 | 0.199415 | 2.294884 | 0.023851 | 0.092853 | 1 |
| ENSG0000 | mucosal h | Inflamed | SCGN      | protein_cc | chr6  | 25652464 | 25702011 | + | 1447  | 98.6969  | 0.011933 | 0.766206 | 0.333918 | 2.294591 | 0.023868 | 0.092892 | 1 |
| ENSG0000 | mucosal h | Inflamed | TAF4      | protein_cc | chr20 | 60528525 | 60640866 | - | 9808  | 1063.301 | 0        | 0.29029  | 0.126511 | 2.294577 | 0.023869 | 0.092892 | 1 |
| ENSG0000 | mucosal h | Inflamed | TRBV11-2  | lincRNA    | chr7  | 1.42E+08 | 1.42E+08 | - | 408   | 14.46778 | 0.052506 | -0.49288 | 0.214804 | -2.29454 | 0.023871 | 0.092892 | 1 |
| ENSG0000 | mucosal h | Inflamed | CTD-3065J | antisense  | chr8  | 1.45E+08 | 1.45E+08 | + | 1818  | 13.03341 | 0.042959 | -0.50729 | 0.221098 | -2.29439 | 0.02388  | 0.092912 | 1 |
| ENSG0000 | mucosal h | Inflamed | MT-TE     | Mt_tRNA    | chrM  | 14674    | 14742    | - | 69    | 116.4606 | 0        | 0.508459 | 0.22162  | 2.294286 | 0.023886 | 0.092923 | 1 |
| ENSG0000 | mucosal h | Inflamed | FUT1      | protein_cc | chr19 | 49251268 | 49258647 | - | 4343  | 62.3389  | 0.01432  | -0.5139  | 0.224011 | -2.29407 | 0.023899 | 0.09296  | 1 |
| ENSG0000 | mucosal h | Inflamed | DNASE1    | protein_cc | chr16 | 3661729  | 3730144  | + | 11267 | 1014.16  | 0        | 0.391708 | 0.170756 | 2.293968 | 0.023905 | 0.092969 | 1 |
| ENSG0000 | mucosal h | Inflamed | UGT2B15   | protein_cc | chr4  | 69512348 | 69536346 | - | 2077  | 922.7518 | 0.02148  | 1.022522 | 0.44579  | 2.29373  | 0.02392  | 0.092999 | 1 |
| ENSG0000 | mucosal h | Inflamed | RP11-255F | lincRNA    | chr13 | 1.04E+08 | 1.04E+08 | + | 977   | 1.866348 | 0.536993 | 0.379321 | 0.165373 | 2.293724 | 0.02392  | 0.092999 | 1 |
| ENSG0000 | mucosal h | Inflamed | VAX2      | protein_cc | chr2  | 71127720 | 71160576 | + | 1147  | 7.25537  | 0.085919 | -0.44302 | 0.193164 | -2.29349 | 0.023934 | 0.093039 | 1 |
| ENSG0000 | mucosal h | Inflamed | CCL8      | protein_cc | chr17 | 32646055 | 32648421 | + | 1261  | 166.3699 | 0        | -0.6742  | 0.293994 | -2.29323 | 0.023949 | 0.093077 | 1 |
| ENSG0000 | mucosal h | Inflamed | BTF3      | protein_cc | chr5  | 72794233 | 72801460 | + | 2467  | 9680.601 | 0        | 0.220878 | 0.096318 | 2.293209 | 0.023951 | 0.093077 | 1 |
| ENSG0000 | mucosal h | Inflamed | RP11-662l | antisense  | chr12 | 25102097 | 25113092 | + | 728   | 1.501193 | 0.778043 | -0.50853 | 0.221783 | -2.29292 | 0.023968 | 0.093112 | 1 |
| ENSG0000 | mucosal h | Inflamed | RP11-697E | pseudoger  | chr15 | 90818266 | 90820841 | + | 2576  | 185.537  | 0.002387 | 0.27274  | 0.118952 | 2.292854 | 0.023972 | 0.093112 | 1 |
| ENSG0000 | mucosal h | Inflamed | TMEM109   | protein_cc | chr11 | 60681346 | 60690915 | + | 2421  | 2764.563 | 0        | -0.30112 | 0.13133  | -2.29284 | 0.023973 | 0.093112 | 1 |
| ENSG0000 | mucosal h | Inflamed | PSMB4     | protein_cc | chr1  | 1.51E+08 | 1.51E+08 | + | 2158  | 3851.158 | 0        | -0.22482 | 0.098052 | -2.29282 | 0.023974 | 0.093112 | 1 |
| ENSG0000 | mucosal h | Inflamed | TGFA      | protein_cc | chr2  | 70674412 | 70781325 | - | 4963  | 1084.005 | 0        | 0.410212 | 0.178919 | 2.292717 | 0.02398  | 0.093123 | 1 |
| ENSG0000 | mucosal h | Inflamed | TPSAB1    | protein_cc | chr16 | 1290697  | 1292555  | + | 1512  | 3118.747 | 0        | -0.51561 | 0.224904 | -2.2926  | 0.023987 | 0.093135 | 1 |
| ENSG0000 | mucosal h | Inflamed | CTA-398F1 | lincRNA    | chr8  | 8314419  | 8318847  | - | 510   | 3.033413 | 0.386635 | 0.446425 | 0.194734 | 2.292492 | 0.023994 | 0.093148 | 1 |
| ENSG0000 | mucosal h | Inflamed | MYZAP     | protein_cc | chr15 | 57884139 | 57977562 | + | 2561  | 0.892601 | 0.77327  | 0.2767   | 0.120705 | 2.29237  | 0.024001 | 0.093157 | 1 |
| ENSG0000 | mucosal h | Inflamed | AXIN2     | protein_cc | chr17 | 63524681 | 63557765 | - | 5196  | 1191.542 | 0        | 0.517763 | 0.225867 | 2.292333 | 0.024003 | 0.093157 | 1 |
| ENSG0000 | mucosal h | Inflamed | FADS3     | protein_cc | chr11 | 61640991 | 61659523 | - | 6283  | 601.0597 | 0        | -0.4407  | 0.192259 | -2.29225 | 0.024008 | 0.093163 | 1 |
| ENSG0000 | mucosal h | Inflamed | AVPR1A    | protein_cc | chr12 | 63539014 | 63544722 | - | 1678  | 17.37709 | 0.095465 | -0.70528 | 0.30769  | -2.29217 | 0.024013 | 0.093164 | 1 |
| ENSG0000 | mucosal h | Inflamed | RP11-389C | lincRNA    | chr5  | 71663446 | 71664222 | + | 777   | 10.77327 | 0.078759 | 0.509781 | 0.222405 | 2.292128 | 0.024016 | 0.093164 | 1 |
| ENSG0000 | mucosal h | Inflamed | CTD-2256f | antisense  | chr5  | 10264709 | 10267258 | - | 2550  | 7.415274 | 0.21957  | 0.539798 | 0.23551  | 2.292044 | 0.024021 | 0.093169 | 1 |
| ENSG0000 | mucosal h | Inflamed | TCTA      | protein_cc | chr3  | 49449639 | 49453908 | + | 2747  | 1610.317 | 0        | 0.170926 | 0.074596 | 2.291375 | 0.024061 | 0.093302 | 1 |
| ENSG0000 | mucosal h | Inflamed | OSBPL6    | protein_cc | chr2  | 1.79E+08 | 1.79E+08 | + | 8028  | 93.99761 | 0        | 0.367576 | 0.160419 | 2.291356 | 0.024062 | 0.093302 | 1 |

|          |           |          |           |            |       |          |          |   |       |          |          |          |          |          |          |          |   |
|----------|-----------|----------|-----------|------------|-------|----------|----------|---|-------|----------|----------|----------|----------|----------|----------|----------|---|
| ENSG0000 | mucosal h | Inflamed | TRBV4-2   | TR_V_gene  | chr7  | 1.42E+08 | 1.42E+08 | + | 455   | 17.70406 | 0.047733 | -0.52266 | 0.228119 | -2.29116 | 0.024073 | 0.093322 | 1 |
| ENSG0000 | mucosal h | Inflamed | ABCB7     | protein_cc | chrX  | 74273115 | 74376567 | - | 2819  | 513.3484 | 0        | 0.330746 | 0.144358 | 2.291153 | 0.024074 | 0.093322 | 1 |
| ENSG0000 | mucosal h | Inflamed | CTDSP2    | protein_cc | chr12 | 58213710 | 58240522 | - | 5442  | 16160.18 | 0        | 0.240998 | 0.1052   | 2.290862 | 0.024092 | 0.093376 | 1 |
| ENSG0000 | mucosal h | Inflamed | SERTAD3   | protein_cc | chr19 | 40946751 | 40950612 | - | 2218  | 931.0764 | 0        | -0.19334 | 0.0844   | -2.29078 | 0.024097 | 0.093382 | 1 |
| ENSG0000 | mucosal h | Inflamed | RP11-13A1 | lincRNA    | chr12 | 89404458 | 89413456 | - | 2941  | 2.26253  | 0.508353 | -0.38765 | 0.169233 | -2.29061 | 0.024107 | 0.093408 | 1 |
| ENSG0000 | mucosal h | Inflamed | DEGS2     | protein_cc | chr14 | 1.01E+08 | 1.01E+08 | - | 2004  | 887.6396 | 0        | 0.591665 | 0.258326 | 2.290376 | 0.024121 | 0.093446 | 1 |
| ENSG0000 | mucosal h | Inflamed | RP11-415F | antisense  | chr3  | 16380815 | 16381378 | + | 564   | 15.51313 | 0.078759 | 0.580842 | 0.253607 | 2.290324 | 0.024124 | 0.093446 | 1 |
| ENSG0000 | mucosal h | Inflamed | POM121L   | pseudoger  | chr22 | 24647796 | 24661493 | + | 5137  | 71.59189 | 0.023866 | -0.74392 | 0.324825 | -2.29023 | 0.02413  | 0.093454 | 1 |
| ENSG0000 | mucosal h | Inflamed | ANKRA2    | protein_cc | chr5  | 72848160 | 72861511 | - | 2659  | 400.7876 | 0        | 0.369476 | 0.161341 | 2.290029 | 0.024142 | 0.093487 | 1 |
| ENSG0000 | mucosal h | Inflamed | MTSS1     | protein_cc | chr8  | 1.26E+08 | 1.26E+08 | - | 7787  | 1133.635 | 0        | 0.401317 | 0.175254 | 2.289918 | 0.024148 | 0.093487 | 1 |
| ENSG0000 | mucosal h | Inflamed | PLCB4     | protein_cc | chr20 | 9049410  | 9461889  | + | 6900  | 909.0835 | 0        | 0.617926 | 0.269847 | 2.289913 | 0.024149 | 0.093487 | 1 |
| ENSG0000 | mucosal h | Inflamed | TMEM132   | protein_cc | chr12 | 1.26E+08 | 1.26E+08 | + | 15656 | 45.08353 | 0.00716  | 0.532554 | 0.232578 | 2.289785 | 0.024156 | 0.093503 | 1 |
| ENSG0000 | mucosal h | Inflamed | LINC0084C | lincRNA    | chr10 | 44354859 | 44390881 | + | 1974  | 4.207637 | 0.362768 | -0.46765 | 0.204255 | -2.28954 | 0.024171 | 0.093546 | 1 |
| ENSG0000 | mucosal h | Inflamed | RP11-333A | lincRNA    | chr8  | 71383369 | 71397922 | + | 2367  | 6.668258 | 0.422434 | -0.54373 | 0.237498 | -2.28943 | 0.024178 | 0.093558 | 1 |
| ENSG0000 | mucosal h | Inflamed | SFXN3     | protein_cc | chr10 | 1.03E+08 | 1.03E+08 | + | 4628  | 1754.329 | 0        | -0.28255 | 0.123435 | -2.28906 | 0.0242   | 0.093632 | 1 |
| ENSG0000 | mucosal h | Inflamed | CCL16     | protein_cc | chr17 | 34303529 | 34308532 | - | 1744  | 7.620525 | 0.155131 | 0.490466 | 0.214277 | 2.288934 | 0.024208 | 0.093647 | 1 |
| ENSG0000 | mucosal h | Inflamed | ARSA      | protein_cc | chr22 | 51061182 | 51066607 | - | 2938  | 4064.064 | 0        | -0.27575 | 0.120476 | -2.2888  | 0.024216 | 0.093664 | 1 |
| ENSG0000 | mucosal h | Inflamed | CTD-3049I | lincRNA    | chr15 | 94261771 | 94614049 | - | 6795  | 7.190931 | 0.205251 | 0.598544 | 0.261556 | 2.288398 | 0.02424  | 0.093744 | 1 |
| ENSG0000 | mucosal h | Inflamed | PPP2R4    | protein_cc | chr9  | 1.32E+08 | 1.32E+08 | + | 5907  | 5674.592 | 0        | -0.16605 | 0.072565 | -2.28832 | 0.024245 | 0.093749 | 1 |
| ENSG0000 | mucosal h | Inflamed | AC016586  | protein_cc | chr19 | 4041127  | 4043154  | - | 2028  | 16.47017 | 0.031026 | 0.417226 | 0.182351 | 2.288041 | 0.024262 | 0.093797 | 1 |
| ENSG0000 | mucosal h | Inflamed | TMEM215   | protein_cc | chr9  | 32783497 | 32787397 | + | 3581  | 4.818616 | 0.384248 | -0.57025 | 0.249239 | -2.28797 | 0.024266 | 0.093797 | 1 |
| ENSG0000 | mucosal h | Inflamed | ZNF444    | protein_cc | chr19 | 56643968 | 56672262 | + | 7239  | 1317.348 | 0        | 0.237853 | 0.10396  | 2.287932 | 0.024268 | 0.093797 | 1 |
| ENSG0000 | mucosal h | Inflamed | AMZ2P1    | pseudoger  | chr17 | 62962668 | 62971694 | - | 3858  | 206.6897 | 0        | 0.354298 | 0.154859 | 2.28788  | 0.024272 | 0.093797 | 1 |
| ENSG0000 | mucosal h | Inflamed | MIR146A   | lincRNA    | chr5  | 1.6E+08  | 1.6E+08  | + | 2301  | 200.6683 | 0.004773 | -0.84412 | 0.368968 | -2.28779 | 0.024277 | 0.093805 | 1 |
| ENSG0000 | mucosal h | Inflamed | RP3-476K  | pseudoger  | chr1  | 26781144 | 26781678 | - | 535   | 1.852029 | 0.501193 | 0.345482 | 0.151045 | 2.287281 | 0.024308 | 0.093902 | 1 |
| ENSG0000 | mucosal h | Inflamed | KCND1     | protein_cc | chrX  | 48818639 | 48827976 | - | 5807  | 201.8186 | 0.002387 | -0.46198 | 0.201979 | -2.28725 | 0.02431  | 0.093902 | 1 |
| ENSG0000 | mucosal h | Inflamed | snoU13    | snoRNA     | chr22 | 32349391 | 32349493 | + | 103   | 1.513126 | 0.615752 | 0.299969 | 0.131201 | 2.28633  | 0.024366 | 0.094105 | 1 |
| ENSG0000 | mucosal h | Inflamed | USH2A     | protein_cc | chr1  | 2.16E+08 | 2.17E+08 | - | 20584 | 3.076372 | 0.346062 | -0.43172 | 0.188835 | -2.2862  | 0.024373 | 0.094121 | 1 |
| ENSG0000 | mucosal h | Inflamed | CACNA1C   | protein_cc | chr12 | 2079952  | 2802108  | + | 14095 | 498.2768 | 0        | -0.46159 | 0.201914 | -2.2861  | 0.02438  | 0.094131 | 1 |
| ENSG0000 | mucosal h | Inflamed | PRB3      | protein_cc | chr12 | 11418857 | 11422739 | - | 1387  | 1.109785 | 0.718377 | 0.289096 | 0.12649  | 2.285522 | 0.024415 | 0.09425  | 1 |
| ENSG0000 | mucosal h | Inflamed | TCF3      | protein_cc | chr19 | 1609291  | 1652604  | - | 6061  | 4101.621 | 0        | -0.25881 | 0.113245 | -2.28543 | 0.02442  | 0.09425  | 1 |
| ENSG0000 | mucosal h | Inflamed | IL7R      | protein_cc | chr5  | 35852797 | 35879705 | + | 6060  | 2248.778 | 0        | -0.84838 | 0.371217 | -2.28542 | 0.024421 | 0.09425  | 1 |
| ENSG0000 | mucosal h | Inflamed | RP11-448C | antisense  | chr4  | 10008106 | 10011349 | + | 459   | 11.68496 | 0.097852 | 0.571899 | 0.250291 | 2.284935 | 0.02445  | 0.094349 | 1 |
| ENSG0000 | mucosal h | Inflamed | KB-431C1  | antisense  | chr8  | 1.03E+08 | 1.03E+08 | + | 1430  | 3.976134 | 0.343675 | 0.408464 | 0.178818 | 2.28425  | 0.024492 | 0.094497 | 1 |
| ENSG0000 | mucosal h | Inflamed | MC4R      | protein_cc | chr18 | 58038564 | 58040001 | - | 1438  | 5.124105 | 0.412888 | -0.63084 | 0.276185 | -2.2841  | 0.024501 | 0.094518 | 1 |
| ENSG0000 | mucosal h | Inflamed | FEN1      | protein_cc | chr11 | 61560109 | 61564716 | + | 2478  | 918.0143 | 0        | -0.29851 | 0.130694 | -2.28399 | 0.024508 | 0.094529 | 1 |
| ENSG0000 | mucosal h | Inflamed | UMODL1    | protein_cc | chr21 | 43483068 | 43563563 | + | 7278  | 17.27446 | 0.023866 | 0.493507 | 0.216103 | 2.283664 | 0.024528 | 0.094587 | 1 |
| ENSG0000 | mucosal h | Inflamed | MBOAT4    | protein_cc | chr8  | 29989340 | 30002202 | - | 1512  | 2.801909 | 0.431981 | 0.415535 | 0.181962 | 2.283631 | 0.02453  | 0.094587 | 1 |
| ENSG0000 | mucosal h | Inflamed | CDS1      | protein_cc | chr4  | 85504132 | 85572491 | + | 4461  | 1747.351 | 0        | 0.594909 | 0.260532 | 2.283438 | 0.024542 | 0.094613 | 1 |
| ENSG0000 | mucosal h | Inflamed | L2HGDH    | protein_cc | chr14 | 50704281 | 50779266 | - | 3911  | 191.7566 | 0.002387 | 0.434156 | 0.190136 | 2.283401 | 0.024544 | 0.094613 | 1 |

|          |           |          |           |                  |          |          |   |       |          |          |          |          |          |          |          |   |
|----------|-----------|----------|-----------|------------------|----------|----------|---|-------|----------|----------|----------|----------|----------|----------|----------|---|
| ENSG0000 | mucosal h | Inflamed | ALPI      | protein_cc chr2  | 2.33E+08 | 2.33E+08 | + | 2632  | 1174.876 | 0.00716  | 1.042156 | 0.456434 | 2.283259 | 0.024553 | 0.094633 | 1 |
| ENSG0000 | mucosal h | Inflamed | RP4-583P1 | protein_cc chr20 | 62340216 | 62370456 | + | 3119  | 28.72076 | 0.033413 | 0.439053 | 0.192322 | 2.282908 | 0.024574 | 0.094702 | 1 |
| ENSG0000 | mucosal h | Inflamed | ZBTB3     | protein_cc chr11 | 62515791 | 62521660 | - | 3348  | 312.6301 | 0        | 0.262871 | 0.115152 | 2.282813 | 0.02458  | 0.09471  | 1 |
| ENSG0000 | mucosal h | Inflamed | RP11-113k | pseudoger chr11  | 82822102 | 82822484 | - | 383   | 2.470167 | 0.410501 | -0.37626 | 0.164837 | -2.28259 | 0.024594 | 0.094741 | 1 |
| ENSG0000 | mucosal h | Inflamed | COL9A3    | protein_cc chr20 | 61447596 | 61472511 | + | 4831  | 183.7064 | 0        | -0.40889 | 0.179135 | -2.28256 | 0.024595 | 0.094741 | 1 |
| ENSG0000 | mucosal h | Inflamed | NLRP1     | protein_cc chr17 | 5402747  | 5522744  | - | 12811 | 1709.678 | 0        | -0.52243 | 0.228914 | -2.28223 | 0.024616 | 0.09479  | 1 |
| ENSG0000 | mucosal h | Inflamed | PTPRVP    | pseudoger chr1   | 2.02E+08 | 2.02E+08 | + | 6596  | 34.27446 | 0.050119 | -0.65751 | 0.288101 | -2.28221 | 0.024617 | 0.09479  | 1 |
| ENSG0000 | mucosal h | Inflamed | CTD-2643f | lincRNA chr15    | 94448634 | 94651167 | - | 3267  | 0.856802 | 0.799523 | 0.304561 | 0.133452 | 2.28218  | 0.024619 | 0.09479  | 1 |
| ENSG0000 | mucosal h | Inflamed | RNASE1    | protein_cc chr14 | 21269387 | 21271437 | - | 1506  | 4643.274 | 0        | 0.38744  | 0.169783 | 2.281976 | 0.024631 | 0.094824 | 1 |
| ENSG0000 | mucosal h | Inflamed | RP11-29Hf | pseudoger chr1   | 1.56E+08 | 1.56E+08 | - | 2505  | 5.949881 | 0.243437 | -0.46715 | 0.204731 | -2.28179 | 0.024643 | 0.094856 | 1 |
| ENSG0000 | mucosal h | Inflamed | FAM86B1   | protein_cc chr8  | 12039605 | 12051642 | - | 4232  | 58.48687 | 0.002387 | 0.327298 | 0.143454 | 2.281552 | 0.024657 | 0.094897 | 1 |
| ENSG0000 | mucosal h | Inflamed | C20orf24  | protein_cc chr20 | 35234137 | 35240960 | + | 1517  | 849.5847 | 0        | -0.26957 | 0.118163 | -2.28131 | 0.024672 | 0.094941 | 1 |
| ENSG0000 | mucosal h | Inflamed | PEX11G    | protein_cc chr19 | 7541761  | 7562335  | - | 1466  | 156.1146 | 0        | 0.290423 | 0.127309 | 2.28124  | 0.024676 | 0.094943 | 1 |
| ENSG0000 | mucosal h | Inflamed | RP4-673Df | pseudoger chr20  | 1748603  | 1760641  | - | 1564  | 5.121718 | 0.257757 | -0.52944 | 0.232116 | -2.28094 | 0.024695 | 0.095    | 1 |
| ENSG0000 | mucosal h | Inflamed | RP11-358L | lincRNA chr15    | 79705700 | 79706228 | + | 529   | 5.319809 | 0.136038 | -0.41311 | 0.181119 | -2.28085 | 0.024701 | 0.095008 | 1 |
| ENSG0000 | mucosal h | Inflamed | KIAA1919  | protein_cc chr6  | 1.12E+08 | 1.12E+08 | + | 5958  | 263.9189 | 0.002387 | 0.507924 | 0.222714 | 2.280613 | 0.024715 | 0.095049 | 1 |
| ENSG0000 | mucosal h | Inflamed | AC141928  | lincRNA chr4     | 3760475  | 3765117  | - | 4525  | 19.32697 | 0.083532 | -0.60902 | 0.267053 | -2.28051 | 0.024721 | 0.095054 | 1 |
| ENSG0000 | mucosal h | Inflamed | AF127936  | lincRNA chr21    | 16119083 | 16126184 | - | 1863  | 11.15036 | 0.085919 | -0.5771  | 0.253066 | -2.28044 | 0.024726 | 0.095054 | 1 |
| ENSG0000 | mucosal h | Inflamed | SNHG11    | processed_chr20  | 37075221 | 37079564 | + | 2813  | 292.6802 | 0        | 0.219429 | 0.096223 | 2.280417 | 0.024727 | 0.095054 | 1 |
| ENSG0000 | mucosal h | Inflamed | KCNT1     | protein_cc chr9  | 1.39E+08 | 1.39E+08 | + | 9275  | 6.040573 | 0.236277 | -0.51997 | 0.228056 | -2.28001 | 0.024752 | 0.095137 | 1 |
| ENSG0000 | mucosal h | Inflamed | RHOQP2    | pseudoger chr2   | 1.32E+08 | 1.32E+08 | + | 618   | 4.837709 | 0.207637 | -0.45297 | 0.198684 | -2.27988 | 0.02476  | 0.095154 | 1 |
| ENSG0000 | mucosal h | Inflamed | NEDD9     | protein_cc chr6  | 11183531 | 11382581 | - | 10359 | 3505.909 | 0        | 0.297027 | 0.130291 | 2.279725 | 0.02477  | 0.095176 | 1 |
| ENSG0000 | mucosal h | Inflamed | ARHGAP3f  | protein_cc chr11 | 1.29E+08 | 1.29E+08 | - | 12841 | 3938.699 | 0        | 0.508873 | 0.223257 | 2.279315 | 0.024795 | 0.095252 | 1 |
| ENSG0000 | mucosal h | Inflamed | WDR20     | protein_cc chr14 | 1.03E+08 | 1.03E+08 | + | 7328  | 815.9642 | 0        | 0.254216 | 0.111533 | 2.279285 | 0.024797 | 0.095252 | 1 |
| ENSG0000 | mucosal h | Inflamed | RP11-649f | sense_intr chr17 | 73141356 | 73142641 | - | 717   | 32.36038 | 0.064439 | 0.673974 | 0.295814 | 2.278368 | 0.024853 | 0.095456 | 1 |
| ENSG0000 | mucosal h | Inflamed | RP11-255E | pseudoger chr3   | 1.14E+08 | 1.14E+08 | + | 619   | 1.673031 | 0.620525 | 0.349137 | 0.153246 | 2.278272 | 0.024859 | 0.095465 | 1 |
| ENSG0000 | mucosal h | Inflamed | UGT2B17   | protein_cc chr4  | 69402902 | 69434245 | - | 2077  | 11188.26 | 0.033413 | 1.131239 | 0.496596 | 2.277985 | 0.024877 | 0.095509 | 1 |
| ENSG0000 | mucosal h | Inflamed | ZNF461    | protein_cc chr19 | 37128094 | 37157755 | - | 4195  | 99.6969  | 0.004773 | 0.467002 | 0.205011 | 2.277933 | 0.02488  | 0.095509 | 1 |
| ENSG0000 | mucosal h | Inflamed | CTD-2337J | lincRNA chr19    | 54753289 | 54753907 | - | 619   | 63.06444 | 0.002387 | 0.357371 | 0.156888 | 2.277872 | 0.024884 | 0.095509 | 1 |
| ENSG0000 | mucosal h | Inflamed | SLCO5A1   | protein_cc chr8  | 70579282 | 70747299 | - | 9992  | 104.3628 | 0.004773 | -0.4955  | 0.217528 | -2.27785 | 0.024885 | 0.095509 | 1 |
| ENSG0000 | mucosal h | Inflamed | FATE1     | protein_cc chrX  | 1.51E+08 | 1.51E+08 | + | 1072  | 5.183771 | 0.145585 | -0.40637 | 0.178413 | -2.27766 | 0.024897 | 0.09554  | 1 |
| ENSG0000 | mucosal h | Inflamed | RP11-16E1 | lincRNA chr15    | 31508223 | 31516648 | + | 1901  | 20.99523 | 0.002387 | 0.384433 | 0.168796 | 2.2775   | 0.024907 | 0.095565 | 1 |
| ENSG0000 | mucosal h | Inflamed | CEP70     | protein_cc chr3  | 1.38E+08 | 1.38E+08 | - | 4421  | 355.1408 | 0        | 0.476058 | 0.209037 | 2.277389 | 0.024914 | 0.095567 | 1 |
| ENSG0000 | mucosal h | Inflamed | GIMAP8    | protein_cc chr7  | 1.5E+08  | 1.5E+08  | + | 4184  | 1036.446 | 0        | -0.46304 | 0.203328 | -2.27732 | 0.024918 | 0.095567 | 1 |
| ENSG0000 | mucosal h | Inflamed | RP11-626f | lincRNA chr11    | 69831982 | 69861921 | + | 432   | 8.491647 | 0.145585 | 0.579931 | 0.254655 | 2.277315 | 0.024919 | 0.095567 | 1 |
| ENSG0000 | mucosal h | Inflamed | CBLN3     | protein_cc chr14 | 24895738 | 24900160 | - | 2562  | 208.9499 | 0        | -0.47824 | 0.21002  | -2.27711 | 0.024931 | 0.095602 | 1 |
| ENSG0000 | mucosal h | Inflamed | RP11-474f | lincRNA chr12    | 1.31E+08 | 1.31E+08 | - | 4708  | 2.126492 | 0.754177 | 0.558986 | 0.245512 | 2.276819 | 0.024949 | 0.095657 | 1 |
| ENSG0000 | mucosal h | Inflamed | SOHLH2    | protein_cc chr13 | 36742345 | 36871979 | - | 3980  | 1.164678 | 0.74463  | -0.32363 | 0.142146 | -2.27675 | 0.024954 | 0.09566  | 1 |
| ENSG0000 | mucosal h | Inflamed | RHAG      | protein_cc chr6  | 49572871 | 49604552 | - | 1912  | 0.823389 | 0.797136 | 0.262117 | 0.115144 | 2.276436 | 0.024973 | 0.09572  | 1 |
| ENSG0000 | mucosal h | Inflamed | FAM86B3f  | pseudoger chr8   | 8086117  | 8102387  | + | 4870  | 141.3246 | 0.002387 | 0.46553  | 0.20452  | 2.276204 | 0.024988 | 0.095761 | 1 |

|          |           |          |           |            |       |          |          |   |       |          |          |          |          |          |          |          |   |
|----------|-----------|----------|-----------|------------|-------|----------|----------|---|-------|----------|----------|----------|----------|----------|----------|----------|---|
| ENSG0000 | mucosal h | Inflamed | AGO1      | protein_cc | chr1  | 36335409 | 36395211 | + | 12886 | 2323.981 | 0        | 0.300651 | 0.132089 | 2.276125 | 0.024992 | 0.095766 | 1 |
| ENSG0000 | mucosal h | Inflamed | Y_RNA     | misc_RNA   | chr2  | 85594708 | 85594809 | + | 102   | 1.326969 | 0.632458 | 0.325953 | 0.14321  | 2.276049 | 0.024997 | 0.09577  | 1 |
| ENSG0000 | mucosal h | Inflamed | RHOBTB2   | protein_cc | chr8  | 22844930 | 22877712 | + | 6580  | 962.7375 | 0        | -0.37409 | 0.164371 | -2.27591 | 0.025006 | 0.09579  | 1 |
| ENSG0000 | mucosal h | Inflamed | GORASP1   | protein_cc | chr3  | 39138150 | 39149854 | - | 6256  | 3686.644 | 0        | 0.221656 | 0.097396 | 2.275816 | 0.025012 | 0.095798 | 1 |
| ENSG0000 | mucosal h | Inflamed | HRASLS5   | protein_cc | chr11 | 63228876 | 63258666 | - | 3268  | 20.72792 | 0.031026 | -0.48188 | 0.211817 | -2.27499 | 0.025063 | 0.09598  | 1 |
| ENSG0000 | mucosal h | Inflamed | FAM66B    | lincRNA    | chr8  | 7159133  | 7212876  | - | 3339  | 14.65871 | 0.02864  | 0.371135 | 0.163158 | 2.274701 | 0.025081 | 0.096036 | 1 |
| ENSG0000 | mucosal h | Inflamed | FAM222A   | protein_cc | chr12 | 1.1E+08  | 1.1E+08  | + | 3722  | 318.5251 | 0        | 0.400792 | 0.176205 | 2.27458  | 0.025089 | 0.096051 | 1 |
| ENSG0000 | mucosal h | Inflamed | ZNF283    | protein_cc | chr19 | 44331444 | 44353307 | + | 4367  | 108.9976 | 0.002387 | 0.451459 | 0.198514 | 2.274188 | 0.025113 | 0.09613  | 1 |
| ENSG0000 | mucosal h | Inflamed | CSPG4P13  | pseudoger  | chr15 | 78187026 | 78197016 | + | 4818  | 12.51074 | 0.088305 | -0.54581 | 0.240021 | -2.274   | 0.025125 | 0.096161 | 1 |
| ENSG0000 | mucosal h | Inflamed | AC118278  | miRNA      | chr4  | 130242   | 130349   | + | 108   | 7.357995 | 0.174224 | 0.516483 | 0.227132 | 2.27393  | 0.025129 | 0.096161 | 1 |
| ENSG0000 | mucosal h | Inflamed | LCT       | protein_cc | chr2  | 1.37E+08 | 1.37E+08 | - | 6586  | 12.85919 | 0.346062 | -0.67175 | 0.295418 | -2.27388 | 0.025132 | 0.096161 | 1 |
| ENSG0000 | mucosal h | Inflamed | RP11-5791 | lincRNA    | chr12 | 49182930 | 49184318 | + | 554   | 22.90931 | 0.023866 | 0.546494 | 0.24035  | 2.273741 | 0.025141 | 0.096181 | 1 |
| ENSG0000 | mucosal h | Inflamed | LGALS9C   | protein_cc | chr17 | 18380051 | 18398259 | + | 4754  | 858.7422 | 0        | 0.73084  | 0.321442 | 2.273631 | 0.025148 | 0.096193 | 1 |
| ENSG0000 | mucosal h | Inflamed | PTPDC1    | protein_cc | chr9  | 96793076 | 96872138 | + | 6301  | 262.8329 | 0        | 0.42589  | 0.187332 | 2.273446 | 0.025159 | 0.09621  | 1 |
| ENSG0000 | mucosal h | Inflamed | KIF22     | protein_cc | chr16 | 29802040 | 29816706 | + | 4312  | 1907.57  | 0        | 0.24199  | 0.106442 | 2.273442 | 0.02516  | 0.09621  | 1 |
| ENSG0000 | mucosal h | Inflamed | PCDHGC5   | protein_cc | chr5  | 1.41E+08 | 1.41E+08 | + | 4641  | 12.09308 | 0.093079 | 0.479187 | 0.210828 | 2.272884 | 0.025194 | 0.09633  | 1 |
| ENSG0000 | mucosal h | Inflamed | LINC00894 | antisense  | chrX  | 1.49E+08 | 1.49E+08 | + | 6323  | 131.6062 | 0.016706 | 0.76284  | 0.335652 | 2.272713 | 0.025205 | 0.096357 | 1 |
| ENSG0000 | mucosal h | Inflamed | SEC14L6   | protein_cc | chr22 | 30918786 | 30942669 | - | 3392  | 18.61814 | 0.02148  | -0.45185 | 0.198825 | -2.27258 | 0.025214 | 0.096375 | 1 |
| ENSG0000 | mucosal h | Inflamed | NPIP4     | protein_cc | chr16 | 21845890 | 21892148 | - | 7408  | 500.179  | 0.002387 | 0.610207 | 0.268534 | 2.272366 | 0.025227 | 0.096412 | 1 |
| ENSG0000 | mucosal h | Inflamed | RP11-167F | sense_intr | chr16 | 67772491 | 67773825 | - | 569   | 8.49642  | 0.143198 | 0.510855 | 0.22488  | 2.271678 | 0.02527  | 0.096562 | 1 |
| ENSG0000 | mucosal h | Inflamed | GSG2      | protein_cc | chr17 | 3627211  | 3630067  | + | 2857  | 144.7494 | 0.00716  | -0.46288 | 0.203788 | -2.27138 | 0.025289 | 0.09662  | 1 |
| ENSG0000 | mucosal h | Inflamed | PTPRS     | protein_cc | chr19 | 5158506  | 5340814  | - | 9460  | 1237.36  | 0        | -0.49292 | 0.217032 | -2.27118 | 0.025301 | 0.096647 | 1 |
| ENSG0000 | mucosal h | Inflamed | MFSD6L    | protein_cc | chr17 | 8700436  | 8702667  | - | 2232  | 258.9403 | 0        | 0.509346 | 0.224268 | 2.271148 | 0.025303 | 0.096647 | 1 |
| ENSG0000 | mucosal h | Inflamed | CITF22-1A | lincRNA    | chr22 | 50295876 | 50298224 | + | 2349  | 29.9284  | 0.023866 | 0.475803 | 0.209506 | 2.271073 | 0.025308 | 0.096651 | 1 |
| ENSG0000 | mucosal h | Inflamed | ATPIF1    | protein_cc | chr1  | 28562620 | 28573417 | + | 2225  | 3764.64  | 0        | 0.219568 | 0.096698 | 2.270667 | 0.025334 | 0.096735 | 1 |
| ENSG0000 | mucosal h | Inflamed | RP11-2161 | pseudoger  | chr1  | 1.54E+08 | 1.54E+08 | - | 1309  | 4.317422 | 0.145585 | -0.3768  | 0.165959 | -2.27044 | 0.025348 | 0.096775 | 1 |
| ENSG0000 | mucosal h | Inflamed | RAB11FIP4 | protein_cc | chr17 | 29718642 | 29865236 | + | 15384 | 3499.936 | 0        | 0.278964 | 0.122878 | 2.270252 | 0.02536  | 0.096796 | 1 |
| ENSG0000 | mucosal h | Inflamed | PAQR8     | protein_cc | chr6  | 52226219 | 52272575 | + | 5057  | 5828.477 | 0        | 0.509094 | 0.22425  | 2.270207 | 0.025362 | 0.096796 | 1 |
| ENSG0000 | mucosal h | Inflamed | MEIS3     | protein_cc | chr19 | 47906381 | 47922780 | - | 5122  | 287.1002 | 0        | -0.439   | 0.193375 | -2.27018 | 0.025364 | 0.096796 | 1 |
| ENSG0000 | mucosal h | Inflamed | PARP3     | protein_cc | chr3  | 51976361 | 51982883 | + | 2928  | 1333.301 | 0        | -0.20305 | 0.089462 | -2.26969 | 0.025395 | 0.096898 | 1 |
| ENSG0000 | mucosal h | Inflamed | SLC45A3   | protein_cc | chr1  | 2.06E+08 | 2.06E+08 | - | 3702  | 1700.766 | 0        | 0.351264 | 0.154787 | 2.269343 | 0.025417 | 0.096969 | 1 |
| ENSG0000 | mucosal h | Inflamed | ACRBP     | protein_cc | chr12 | 6747241  | 6756626  | - | 2843  | 111.3461 | 0        | 0.312457 | 0.137691 | 2.269263 | 0.025422 | 0.096974 | 1 |
| ENSG0000 | mucosal h | Inflamed | RPH3A     | protein_cc | chr12 | 1.13E+08 | 1.13E+08 | + | 10381 | 10.57518 | 0.119332 | -0.64723 | 0.285336 | -2.26829 | 0.025483 | 0.097182 | 1 |
| ENSG0000 | mucosal h | Inflamed | MID1IP1   | protein_cc | chrX  | 38660685 | 38665790 | + | 2592  | 1748.53  | 0        | -0.24557 | 0.108265 | -2.26823 | 0.025487 | 0.097182 | 1 |
| ENSG0000 | mucosal h | Inflamed | SLC30A4   | protein_cc | chr15 | 45771809 | 45815005 | - | 7293  | 473.1551 | 0        | 0.425023 | 0.187382 | 2.268224 | 0.025488 | 0.097182 | 1 |
| ENSG0000 | mucosal h | Inflamed | PNPLA2    | protein_cc | chr11 | 818902   | 825573   | + | 3843  | 5967.986 | 0        | 0.280299 | 0.123585 | 2.26806  | 0.025498 | 0.097207 | 1 |
| ENSG0000 | mucosal h | Inflamed | SNX4      | protein_cc | chr3  | 1.25E+08 | 1.25E+08 | - | 2702  | 846.9332 | 0        | 0.335951 | 0.148136 | 2.267853 | 0.025511 | 0.097239 | 1 |
| ENSG0000 | mucosal h | Inflamed | FAM27E2   | protein_cc | chr9  | 45733559 | 45734896 | + | 1338  | 6.909308 | 0.200477 | 0.428046 | 0.188748 | 2.267812 | 0.025514 | 0.097239 | 1 |
| ENSG0000 | mucosal h | Inflamed | CCL11     | protein_cc | chr17 | 32612687 | 32615353 | + | 1079  | 1648.64  | 0        | -0.72738 | 0.320781 | -2.26753 | 0.025531 | 0.097292 | 1 |
| ENSG0000 | mucosal h | Inflamed | RP11-441C | lincRNA    | chr10 | 1.01E+08 | 1.01E+08 | + | 2998  | 51.40334 | 0.011933 | 0.553517 | 0.244115 | 2.267443 | 0.025537 | 0.097299 | 1 |



|          |           |          |           |                  |          |          |   |       |          |          |          |          |          |          |          |   |
|----------|-----------|----------|-----------|------------------|----------|----------|---|-------|----------|----------|----------|----------|----------|----------|----------|---|
| ENSG0000 | mucosal h | Inflamed | GPR31     | protein_cc chr6  | 1.68E+08 | 1.68E+08 | - | 2059  | 6.353222 | 0.217184 | -0.51178 | 0.225715 | -2.26736 | 0.025542 | 0.097305 | 1 |
| ENSG0000 | mucosal h | Inflamed | CXXC11    | protein_cc chr2  | 2.43E+08 | 2.43E+08 | + | 2606  | 11.4821  | 0.224344 | -0.64129 | 0.282863 | -2.26715 | 0.025556 | 0.097342 | 1 |
| ENSG0000 | mucosal h | Inflamed | PAIP1P1   | pseudoger chr6   | 30154575 | 30156391 | - | 1203  | 32.36277 | 0.059666 | 0.639134 | 0.281946 | 2.266862 | 0.025574 | 0.097397 | 1 |
| ENSG0000 | mucosal h | Inflamed | FSTL3     | protein_cc chr19 | 676392   | 683385   | + | 3144  | 543.3532 | 0        | -0.53323 | 0.235251 | -2.26663 | 0.025588 | 0.097439 | 1 |
| ENSG0000 | mucosal h | Inflamed | SORBS1    | protein_cc chr10 | 97071528 | 97321171 | - | 10819 | 1582.971 | 0        | 0.625981 | 0.276184 | 2.266533 | 0.025595 | 0.097448 | 1 |
| ENSG0000 | mucosal h | Inflamed | POLR3K    | protein_cc chr16 | 96407    | 103628   | - | 1889  | 307.8831 | 0        | -0.24715 | 0.109072 | -2.26596 | 0.025631 | 0.097573 | 1 |
| ENSG0000 | mucosal h | Inflamed | SEL1L     | protein_cc chr14 | 81937893 | 82000205 | - | 9559  | 6323.947 | 0        | -0.45206 | 0.19953  | -2.2656  | 0.025654 | 0.097646 | 1 |
| ENSG0000 | mucosal h | Inflamed | RP1-130G  | pseudoger chr6   | 20042686 | 20043171 | - | 486   | 3.455847 | 0.279236 | 0.396072 | 0.174837 | 2.265385 | 0.025668 | 0.097684 | 1 |
| ENSG0000 | mucosal h | Inflamed | NDUFA9    | protein_cc chr12 | 4758261  | 4798454  | + | 5362  | 733.5084 | 0        | 0.270305 | 0.119335 | 2.265098 | 0.025686 | 0.097739 | 1 |
| ENSG0000 | mucosal h | Inflamed | APOL6     | protein_cc chr22 | 36044442 | 36064456 | + | 10121 | 5790.038 | 0        | -0.39712 | 0.175333 | -2.26494 | 0.025696 | 0.097763 | 1 |
| ENSG0000 | mucosal h | Inflamed | RP11-384F | antisense chr9   | 33732973 | 33738414 | - | 486   | 2.73031  | 0.415274 | 0.361402 | 0.159601 | 2.264413 | 0.025729 | 0.097873 | 1 |
| ENSG0000 | mucosal h | Inflamed | MAPKAPK   | protein_cc chr3  | 50648951 | 50686720 | + | 3913  | 2077.227 | 0        | -0.1881  | 0.083069 | -2.26437 | 0.025732 | 0.097873 | 1 |
| ENSG0000 | mucosal h | Inflamed | CCDC125   | protein_cc chr5  | 68576002 | 68628636 | - | 7932  | 810.6897 | 0        | 0.38815  | 0.171466 | 2.263716 | 0.025774 | 0.098017 | 1 |
| ENSG0000 | mucosal h | Inflamed | FBXW7     | protein_cc chr4  | 1.53E+08 | 1.53E+08 | - | 10288 | 1071.659 | 0        | -0.45258 | 0.199939 | -2.2636  | 0.025781 | 0.098032 | 1 |
| ENSG0000 | mucosal h | Inflamed | CCSER1    | protein_cc chr4  | 91048686 | 92523064 | + | 10428 | 79.11217 | 0.009547 | 0.555561 | 0.245462 | 2.263331 | 0.025798 | 0.098073 | 1 |
| ENSG0000 | mucosal h | Inflamed | FUZ       | protein_cc chr19 | 50310126 | 50320633 | - | 2951  | 292.4129 | 0        | -0.28459 | 0.125741 | -2.26331 | 0.0258   | 0.098073 | 1 |
| ENSG0000 | mucosal h | Inflamed | NPL       | protein_cc chr1  | 1.83E+08 | 1.83E+08 | + | 4975  | 456.7804 | 0        | -0.41877 | 0.185039 | -2.26316 | 0.025809 | 0.098095 | 1 |
| ENSG0000 | mucosal h | Inflamed | PTPLB     | protein_cc chr3  | 1.23E+08 | 1.23E+08 | - | 5351  | 2006.563 | 0        | 0.43269  | 0.191211 | 2.262887 | 0.025827 | 0.098148 | 1 |
| ENSG0000 | mucosal h | Inflamed | RERE      | protein_cc chr1  | 8412457  | 8877702  | - | 11503 | 6130.881 | 0        | 0.310251 | 0.137121 | 2.262606 | 0.025845 | 0.098176 | 1 |
| ENSG0000 | mucosal h | Inflamed | SLN       | protein_cc chr11 | 1.08E+08 | 1.08E+08 | - | 906   | 2.24105  | 0.756563 | -0.51024 | 0.225518 | -2.26253 | 0.02585  | 0.098176 | 1 |
| ENSG0000 | mucosal h | Inflamed | DBNL      | protein_cc chr7  | 44084239 | 44109055 | + | 12587 | 5963.828 | 0        | -0.16606 | 0.073395 | -2.26253 | 0.02585  | 0.098176 | 1 |
| ENSG0000 | mucosal h | Inflamed | RP11-401F | antisense chr16  | 50639987 | 50647595 | - | 2469  | 2.329356 | 0.5179   | 0.424119 | 0.187454 | 2.262525 | 0.02585  | 0.098176 | 1 |
| ENSG0000 | mucosal h | Inflamed | GPR115    | protein_cc chr6  | 47653600 | 47689757 | + | 3391  | 128.4463 | 0.00716  | 0.7128   | 0.315053 | 2.262477 | 0.025853 | 0.098176 | 1 |
| ENSG0000 | mucosal h | Inflamed | PHF1      | protein_cc chr6  | 33378176 | 33384230 | + | 3596  | 1883.363 | 0        | -0.26803 | 0.118475 | -2.26234 | 0.025862 | 0.098188 | 1 |
| ENSG0000 | mucosal h | Inflamed | RANBP10   | protein_cc chr16 | 67757005 | 67840555 | - | 6401  | 1941.795 | 0        | 0.237891 | 0.105156 | 2.262274 | 0.025866 | 0.098188 | 1 |
| ENSG0000 | mucosal h | Inflamed | MT-TL2    | Mt_tRNA chrM     | 12266    | 12336    | + | 71    | 16.25776 | 0.054893 | 0.602838 | 0.266477 | 2.262253 | 0.025867 | 0.098188 | 1 |
| ENSG0000 | mucosal h | Inflamed | METTL7A   | protein_cc chr12 | 51317255 | 51326300 | + | 4083  | 4081.869 | 0        | 0.32777  | 0.144898 | 2.262073 | 0.025879 | 0.098218 | 1 |
| ENSG0000 | mucosal h | Inflamed | DSTNP2    | pseudoger chr12  | 6993846  | 6994950  | + | 1105  | 114.1766 | 0        | -0.21312 | 0.094225 | -2.26182 | 0.025895 | 0.098265 | 1 |
| ENSG0000 | mucosal h | Inflamed | FAM90A1   | protein_cc chr12 | 8373856  | 8380214  | - | 2538  | 30.82816 | 0.00716  | -0.44933 | 0.198673 | -2.26166 | 0.025905 | 0.09829  | 1 |
| ENSG0000 | mucosal h | Inflamed | RP11-731J | sense_ove chr4   | 47433977 | 47440976 | + | 7000  | 1.300716 | 0.701671 | 0.341063 | 0.150808 | 2.261569 | 0.025911 | 0.098298 | 1 |
| ENSG0000 | mucosal h | Inflamed | RP11-10J5 | lincRNA chr6     | 1.38E+08 | 1.38E+08 | - | 573   | 2.121718 | 0.587112 | -0.45076 | 0.199351 | -2.26112 | 0.02594  | 0.098393 | 1 |
| ENSG0000 | mucosal h | Inflamed | CCR5      | protein_cc chr3  | 46411633 | 46417697 | + | 3883  | 479.3652 | 0        | -0.50869 | 0.225046 | -2.26037 | 0.025988 | 0.098561 | 1 |
| ENSG0000 | mucosal h | Inflamed | NBPF24    | protein_cc chr1  | 1.48E+08 | 1.48E+08 | - | 7196  | 7.828162 | 0.116945 | 0.444928 | 0.196856 | 2.260173 | 0.026001 | 0.098584 | 1 |
| ENSG0000 | mucosal h | Inflamed | RXRA      | protein_cc chr9  | 1.37E+08 | 1.37E+08 | + | 11725 | 6333.076 | 0        | 0.28299  | 0.12521  | 2.26012  | 0.026004 | 0.098584 | 1 |
| ENSG0000 | mucosal h | Inflamed | RPL5P29   | pseudoger chr11  | 56124804 | 56125697 | + | 894   | 6.942721 | 0.095465 | 0.372664 | 0.164889 | 2.260086 | 0.026006 | 0.098584 | 1 |
| ENSG0000 | mucosal h | Inflamed | RP11-99E1 | lincRNA chr14    | 77177001 | 77227731 | - | 540   | 1.708831 | 0.563246 | -0.35894 | 0.158821 | -2.26    | 0.026012 | 0.098584 | 1 |
| ENSG0000 | mucosal h | Inflamed | SPCS3     | protein_cc chr4  | 1.77E+08 | 1.77E+08 | + | 6831  | 3680.32  | 0        | -0.42926 | 0.189941 | -2.25999 | 0.026013 | 0.098584 | 1 |
| ENSG0000 | mucosal h | Inflamed | RP11-212I | lincRNA chr16    | 55461470 | 55496209 | - | 917   | 7.484487 | 0.288783 | -0.51772 | 0.229112 | -2.25967 | 0.026033 | 0.098647 | 1 |
| ENSG0000 | mucosal h | Inflamed | SRL       | protein_cc chr16 | 4239375  | 4292081  | - | 5702  | 53.67303 | 0.019093 | -0.56619 | 0.250583 | -2.25948 | 0.026045 | 0.098663 | 1 |
| ENSG0000 | mucosal h | Inflamed | DNASE1L2  | protein_cc chr16 | 2285817  | 2288712  | + | 2194  | 35.16706 | 0.004773 | 0.377337 | 0.167009 | 2.25939  | 0.026051 | 0.098663 | 1 |

|          |                     |           |                  |          |          |   |       |          |          |          |          |          |          |          |   |
|----------|---------------------|-----------|------------------|----------|----------|---|-------|----------|----------|----------|----------|----------|----------|----------|---|
| ENSG0000 | mucosal hi Inflamed | PMS2P4    | pseudoger chr7   | 66752528 | 66767894 | - | 1327  | 49.82339 | 0        | 0.236624 | 0.10473  | 2.259378 | 0.026052 | 0.098663 | 1 |
| ENSG0000 | mucosal hi Inflamed | RP11-146L | protein_cc chr9  | 42409989 | 42474239 | + | 2248  | 2.75895  | 0.498807 | 0.399262 | 0.176714 | 2.259372 | 0.026052 | 0.098663 | 1 |
| ENSG0000 | mucosal hi Inflamed | C8orf44   | protein_cc chr8  | 67579850 | 67597799 | + | 2510  | 118.7232 | 0.002387 | 0.627635 | 0.277803 | 2.259281 | 0.026058 | 0.098671 | 1 |
| ENSG0000 | mucosal hi Inflamed | GLRX5     | protein_cc chr14 | 95999840 | 96011061 | + | 2845  | 1426.217 | 0        | 0.19236  | 0.085145 | 2.259193 | 0.026064 | 0.098678 | 1 |
| ENSG0000 | mucosal hi Inflamed | IL13      | protein_cc chr5  | 1.32E+08 | 1.32E+08 | + | 2887  | 6.26969  | 0.472554 | -0.6597  | 0.292024 | -2.25905 | 0.026073 | 0.0987   | 1 |
| ENSG0000 | mucosal hi Inflamed | YY1       | protein_cc chr14 | 1.01E+08 | 1.01E+08 | + | 7481  | 4016.532 | 0        | 0.28942  | 0.128138 | 2.258661 | 0.026098 | 0.098779 | 1 |
| ENSG0000 | mucosal hi Inflamed | BOLA3-AS1 | antisense chr2   | 74375136 | 74377188 | + | 1834  | 41.42721 | 0        | -0.3505  | 0.155209 | -2.25823 | 0.026126 | 0.09887  | 1 |
| ENSG0000 | mucosal hi Inflamed | LEMD1     | protein_cc chr1  | 2.05E+08 | 2.05E+08 | - | 1063  | 2.147971 | 0.610979 | -0.47816 | 0.211761 | -2.258   | 0.026141 | 0.098912 | 1 |
| ENSG0000 | mucosal hi Inflamed | UNC5B-AS1 | antisense chr10  | 72976981 | 72977985 | - | 707   | 6.334129 | 0.157518 | 0.543049 | 0.240512 | 2.257891 | 0.026148 | 0.098912 | 1 |
| ENSG0000 | mucosal hi Inflamed | REV1      | protein_cc chr2  | 1E+08    | 1E+08    | - | 7769  | 1023.947 | 0        | 0.507576 | 0.224807 | 2.257829 | 0.026152 | 0.098912 | 1 |
| ENSG0000 | mucosal hi Inflamed | DENND4C   | protein_cc chr9  | 19230433 | 19374139 | + | 9341  | 1357.847 | 0        | 0.494917 | 0.219205 | 2.25778  | 0.026155 | 0.098912 | 1 |
| ENSG0000 | mucosal hi Inflamed | TYW1B     | polymorpt chr7   | 72023729 | 72298777 | - | 3406  | 119.2291 | 0.00716  | 0.410146 | 0.18166  | 2.257769 | 0.026156 | 0.098912 | 1 |
| ENSG0000 | mucosal hi Inflamed | PIGG      | protein_cc chr4  | 492989   | 533985   | + | 10905 | 2359.265 | 0        | 0.295018 | 0.13068  | 2.257568 | 0.026169 | 0.098947 | 1 |
| ENSG0000 | mucosal hi Inflamed | RGS9      | protein_cc chr17 | 63133549 | 63223821 | + | 3664  | 108.2864 | 0.002387 | 0.389951 | 0.172741 | 2.257432 | 0.026178 | 0.098966 | 1 |
| ENSG0000 | mucosal hi Inflamed | SYNDIG1L  | protein_cc chr14 | 74872596 | 74892805 | - | 2612  | 6.28401  | 0.171838 | -0.44946 | 0.199115 | -2.2573  | 0.026186 | 0.098971 | 1 |
| ENSG0000 | mucosal hi Inflamed | FAM60CP   | pseudoger chr18  | 57684010 | 57684673 | - | 664   | 1.825776 | 0.491647 | 0.286474 | 0.126912 | 2.25727  | 0.026188 | 0.098971 | 1 |
| ENSG0000 | mucosal hi Inflamed | MTHFD1L   | protein_cc chr6  | 1.51E+08 | 1.51E+08 | + | 4945  | 522.6563 | 0        | -0.36846 | 0.163236 | -2.25724 | 0.02619  | 0.098971 | 1 |
| ENSG0000 | mucosal hi Inflamed | RP11-477L | antisense chr6   | 1.56E+08 | 1.56E+08 | - | 3088  | 65.90453 | 0.00716  | 0.538036 | 0.238383 | 2.257022 | 0.026204 | 0.099009 | 1 |
| ENSG0000 | mucosal hi Inflamed | ELANE     | protein_cc chr19 | 851014   | 856242   | + | 1023  | 22.18138 | 0.00716  | 0.427817 | 0.189562 | 2.256869 | 0.026214 | 0.099019 | 1 |
| ENSG0000 | mucosal hi Inflamed | SMIM19    | protein_cc chr8  | 42396298 | 42409603 | + | 3323  | 613.6778 | 0        | 0.242427 | 0.107417 | 2.256868 | 0.026214 | 0.099019 | 1 |
| ENSG0000 | mucosal hi Inflamed | RP11-320L | pseudoger chr11  | 85994969 | 85995710 | + | 742   | 27.40573 | 0.02864  | 0.421642 | 0.186848 | 2.256599 | 0.026232 | 0.09907  | 1 |
| ENSG0000 | mucosal hi Inflamed | SCG3      | protein_cc chr15 | 51973550 | 52013223 | + | 3310  | 31.24105 | 0.016706 | 0.525604 | 0.232958 | 2.25622  | 0.026256 | 0.099149 | 1 |
| ENSG0000 | mucosal hi Inflamed | ZNF585A   | protein_cc chr19 | 37597636 | 37663643 | - | 8687  | 153.6826 | 0        | 0.450542 | 0.199695 | 2.256153 | 0.02626  | 0.099151 | 1 |
| ENSG0000 | mucosal hi Inflamed | EVX1-AS1  | antisense chr7   | 27281048 | 27286848 | - | 1361  | 1.5179   | 0.735084 | 0.478274 | 0.211999 | 2.256018 | 0.026269 | 0.09917  | 1 |
| ENSG0000 | mucosal hi Inflamed | AF064858  | lincRNA chr21    | 40249215 | 40328392 | - | 4043  | 6.250597 | 0.167064 | 0.481793 | 0.213574 | 2.255861 | 0.026279 | 0.099194 | 1 |
| ENSG0000 | mucosal hi Inflamed | CTD-2105f | protein_cc chr19 | 55863669 | 55870884 | - | 3058  | 1.873508 | 0.558473 | 0.373283 | 0.165481 | 2.255744 | 0.026287 | 0.099208 | 1 |
| ENSG0000 | mucosal hi Inflamed | ATP6AP1L  | protein_cc chr5  | 81575281 | 81682796 | + | 7185  | 65.80907 | 0.009547 | 0.500673 | 0.221962 | 2.255668 | 0.026292 | 0.099213 | 1 |
| ENSG0000 | mucosal hi Inflamed | CTB-131Bf | processed_chr5   | 1.4E+08  | 1.4E+08  | + | 6140  | 46.31265 | 0.016706 | 0.652967 | 0.289494 | 2.255544 | 0.0263   | 0.099229 | 1 |
| ENSG0000 | mucosal hi Inflamed | CCDC112   | protein_cc chr5  | 1.15E+08 | 1.15E+08 | - | 3289  | 254.2291 | 0        | 0.464685 | 0.206032 | 2.2554   | 0.026309 | 0.09925  | 1 |
| ENSG0000 | mucosal hi Inflamed | COQ10A    | protein_cc chr12 | 56660642 | 56664750 | + | 3243  | 258.6396 | 0        | -0.29262 | 0.129767 | -2.25496 | 0.026338 | 0.099345 | 1 |
| ENSG0000 | mucosal hi Inflamed | CTD-2284J | processed_chr8   | 87345503 | 87355543 | - | 1673  | 30.7494  | 0.004773 | 0.460239 | 0.204116 | 2.254791 | 0.026349 | 0.099371 | 1 |
| ENSG0000 | mucosal hi Inflamed | ELL2P1    | pseudoger chr1   | 1.58E+08 | 1.58E+08 | - | 1906  | 10.9284  | 0.066826 | -0.44715 | 0.198322 | -2.25469 | 0.026356 | 0.099379 | 1 |
| ENSG0000 | mucosal hi Inflamed | PLCH2     | protein_cc chr1  | 2357419  | 2436969  | + | 10781 | 218.8926 | 0.00716  | 0.608705 | 0.269979 | 2.25464  | 0.026359 | 0.099379 | 1 |
| ENSG0000 | mucosal hi Inflamed | BANK1     | protein_cc chr4  | 1.02E+08 | 1.03E+08 | + | 6144  | 344.4415 | 0.002387 | -0.78581 | 0.348603 | -2.25417 | 0.026389 | 0.09948  | 1 |
| ENSG0000 | mucosal hi Inflamed | CD300LG   | protein_cc chr17 | 41924516 | 41940997 | + | 4745  | 15.51551 | 0.064439 | -0.57673 | 0.255877 | -2.25393 | 0.026405 | 0.099525 | 1 |
| ENSG0000 | mucosal hi Inflamed | KCNN4     | protein_cc chr19 | 44270685 | 44285409 | - | 3289  | 1907.356 | 0        | -0.25886 | 0.114859 | -2.25371 | 0.026419 | 0.099565 | 1 |
| ENSG0000 | mucosal hi Inflamed | RP11-434E | lincRNA chr2     | 8861264  | 8862816  | - | 1553  | 33.78282 | 0.016706 | 0.614468 | 0.272674 | 2.253493 | 0.026434 | 0.099604 | 1 |
| ENSG0000 | mucosal hi Inflamed | RP11-549E | antisense chr18  | 29265618 | 29266786 | + | 1169  | 59.95704 | 0.002387 | 0.369682 | 0.164095 | 2.252849 | 0.026476 | 0.099748 | 1 |
| ENSG0000 | mucosal hi Inflamed | RNA5SP28  | rRNA chr9        | 66458144 | 66458262 | - | 119   | 7.420048 | 0.085919 | -0.4304  | 0.191055 | -2.25278 | 0.02648  | 0.099751 | 1 |
| ENSG0000 | mucosal hi Inflamed | OSTC      | protein_cc chr4  | 1.1E+08  | 1.1E+08  | + | 1617  | 1946.582 | 0        | -0.28816 | 0.127927 | -2.2525  | 0.026499 | 0.099803 | 1 |

|          |                     |                   |                 |          |          |   |      |          |          |          |          |          |          |          |   |
|----------|---------------------|-------------------|-----------------|----------|----------|---|------|----------|----------|----------|----------|----------|----------|----------|---|
| ENSG0000 | mucosal hi Inflamed | RP11-100C lincRNA | chr15           | 32828248 | 32879814 | + | 909  | 11.11456 | 0.0358   | 0.393853 | 0.174855 | 2.252455 | 0.026501 | 0.099803 | 1 |
| ENSG0000 | mucosal hi Inflamed | SP110             | protein_cc chr2 | 2.31E+08 | 2.31E+08 | - | 6865 | 1155.749 | 0        | -0.33971 | 0.150862 | -2.2518  | 0.026544 | 0.099948 | 1 |
| ENSG0000 | mucosal hi Inflamed | GNL3LP1           | pseudoger chr5  | 60187762 | 60189404 | - | 1643 | 1.059666 | 0.711217 | 0.230841 | 0.102523 | 2.251599 | 0.026557 | 0.099985 | 1 |

| protein | clinEndpt  | Analytes    | Analytes... | Analytes...CX.. | Detecte | Estimate | Std.Error | teststat | pval     | qval     | bonfpval |
|---------|------------|-------------|-------------|-----------------|---------|----------|-----------|----------|----------|----------|----------|
| P09238  | remission  | Matrix me   | MMP-10      | 161             | 100     | -0.62738 | 0.130514  | -4.80698 | 2.41E-06 | 0.000245 | 0.000487 |
| P39900  | remission  | Matrix me   | MMP-12      | 182             | 100     | -0.77756 | 0.161753  | -4.80706 | 2.42E-06 | 0.000245 | 0.000489 |
| Q07325  | remission  | C-X-C moti  | CXCL9       | 133             | 100     | -0.56375 | 0.147479  | -3.82258 | 0.000161 | 0.010827 | 0.032481 |
| P39900  | response   | Matrix me   | MMP-12      | 182             | 100     | -0.66399 | 0.098561  | -6.73681 | 8.23E-11 | 1.66E-08 | 1.66E-08 |
| P09238  | response   | Matrix me   | MMP-10      | 161             | 100     | -0.49787 | 0.079076  | -6.29613 | 1.06E-09 | 1.07E-07 | 2.14E-07 |
| P15514  | response   | Amphireg    | AR          | 177             | 100     | -0.3947  | 0.069524  | -5.6772  | 3.25E-08 | 2.19E-06 | 6.56E-06 |
| Q16552  | response   | Interleukir | IL-17A      | 116             | 98.2    | -0.46473 | 0.082908  | -5.60543 | 4.65E-08 | 2.35E-06 | 9.40E-06 |
| P13725  | response   | Oncostatin  | OSM         | 126             | 100     | -0.5132  | 0.096066  | -5.34221 | 1.80E-07 | 7.27E-06 | 3.63E-05 |
| P09341  | response   | C-X-C moti  | CXCL1       | 128             | 100     | -0.27476 | 0.053137  | -5.17085 | 4.23E-07 | 1.42E-05 | 8.54E-05 |
| P36222  | response   | Chitinase-; | CHI3L1      | 150             | 100     | -0.40274 | 0.078336  | -5.14119 | 4.92E-07 | 1.42E-05 | 9.95E-05 |
| P03956  | response   | Matrix me   | MMP-1       | 136             | 99.7    | -0.29832 | 0.061578  | -4.84469 | 2.04E-06 | 5.16E-05 | 0.000413 |
| Q9HD89  | response   | Resistin    | RETN        | 143             | 100     | -0.35782 | 0.074335  | -4.8136  | 2.35E-06 | 5.27E-05 | 0.000475 |
| P05231  | response   | Interleukir | IL-6        | 113             | 100     | -0.42104 | 0.105175  | -4.0032  | 7.89E-05 | 0.001595 | 0.015946 |
| P14210  | response   | Hepatocyt   | HGF         | 156             | 100     | -0.23325 | 0.058894  | -3.96057 | 9.36E-05 | 0.001719 | 0.018906 |
| P10145  | response   | Interleukir | IL-8        | 101             | 100     | -0.39873 | 0.101336  | -3.93471 | 0.000104 | 0.001746 | 0.020949 |
| P09603  | response   | Macrophag   | CSF-1       | 109             | 100     | -0.11748 | 0.030572  | -3.84256 | 0.000149 | 0.002312 | 0.030062 |
| P16581  | response   | E-selectin  | SELE        | 108             | 100     | -0.21536 | 0.057566  | -3.74103 | 0.00022  | 0.003171 | 0.0444   |
| P55773  | response   | C-C motif   | CCL23       | 164             | 100     | -0.19556 | 0.053402  | -3.66205 | 0.000295 | 0.003971 | 0.059562 |
| P21583  | response   | Stem cell   | SCF         | 132             | 100     | 0.152525 | 0.042663  | 3.575088 | 0.000408 | 0.005155 | 0.082476 |
| P16422  | response   | Epithelial  | Ep-CAM      | 152             | 100     | 0.274946 | 0.077486  | 3.548333 | 0.00045  | 0.00535  | 0.090943 |
| Q8NEV9  | response   | Interleukir | IL27-A      | 126             | 100     | -0.11108 | 0.033151  | -3.35077 | 0.000909 | 0.009749 | 0.18354  |
| Q07325  | response   | C-X-C moti  | CXCL9       | 133             | 100     | -0.31347 | 0.093614  | -3.34847 | 0.000917 | 0.009749 | 0.185234 |
| P20333  | response   | Tumor nec   | TNF-R2      | 135             | 100     | -0.1608  | 0.04867   | -3.30396 | 0.00107  | 0.010408 | 0.216056 |
| P18510  | response   | Interleukir | IL-1ra      | 112             | 100     | -0.2044  | 0.061929  | -3.30061 | 0.001082 | 0.010408 | 0.218558 |
| P15692  | response   | Vascular e  | VEGF-A      | 102             | 100     | -0.16801 | 0.053084  | -3.1649  | 0.001712 | 0.015717 | 0.34578  |
| P04626  | response   | Receptor t  | ErbB2/HEF   | 153             | 100     | 0.118504 | 0.038015  | 3.117281 | 0.002003 | 0.017595 | 0.404695 |
| P00533  | response   | Epidermal   | EGFR        | 184             | 100     | 0.13495  | 0.044064  | 3.06261  | 0.002394 | 0.020153 | 0.483677 |
| Q07011  | response   | Tumor nec   | TNFRSF9     | 187             | 100     | -0.14897 | 0.049079  | -3.03519 | 0.002611 | 0.021096 | 0.527407 |
| O00300  | response   | Osteoprot   | OPG         | 110             | 100     | -0.12892 | 0.043803  | -2.94303 | 0.0035   | 0.027189 | 0.706918 |
| P56199  | response   | Integrin al | ITGA1       | 185             | 100     | 0.090149 | 0.031997  | 2.817441 | 0.005164 | 0.038367 | 1        |
| Q13478  | response   | Interleukir | IL-18R1     | 151             | 100     | -0.11622 | 0.041398  | -2.80726 | 0.005318 | 0.038367 | 1        |
| P01135  | response   | Transform   | TGF-alpha   | 176             | 100     | -0.24333 | 0.087763  | -2.77254 | 0.005912 | 0.041001 | 1        |
| Q8NFT8  | response   | Delta and   | DNER        | 174             | 100     | 0.108509 | 0.039283  | 2.762223 | 0.006089 | 0.041001 | 1        |
| P35318  | response   | Adrenome    | AM          | 103             | 100     | -0.13583 | 0.05006   | -2.71323 | 0.007051 | 0.045944 | 1        |
| Q9BYZ8  | response   | Regenerat   | REG-4       | 175             | 100     | -0.12901 | 0.048202  | -2.67647 | 0.007852 | 0.049567 | 1        |
| P35613  | response   | Extracellu  | EMMPRIN     | 149             | 100     | 0.069303 | 0.026079  | 2.657416 | 0.008299 | 0.050799 | 1        |
| P07711  | response   | Cathepsin   | CTSL1       | 185             | 100     | -0.10055 | 0.038575  | -2.60652 | 0.009602 | 0.056357 | 1        |
| P06127  | response   | T-cell surf | CD5         | 165             | 100     | -0.10605 | 0.040782  | -2.60041 | 0.009765 | 0.056357 | 1        |
| O43927  | response   | C-X-C moti  | CXCL13      | 183             | 100     | -0.20354 | 0.082948  | -2.45377 | 0.014709 | 0.082534 | 1        |
| Q99732  | response   | Lipopolysa  | LITAF       | 157             | 99.9    | -0.15106 | 0.061825  | -2.44335 | 0.015132 | 0.082612 | 1        |
| P19438  | response   | Tumor nec   | TNF-R1      | 124             | 100     | -0.09257 | 0.038053  | -2.43277 | 0.015572 | 0.082778 | 1        |
| Q8WXI7  | response   | Ovarian ca  | CA-125      | 191             | 100     | -0.13444 | 0.05601   | -2.40023 | 0.016998 | 0.08804  | 1        |
| P13726  | response   | Tissue fact | TF          | 123             | 100     | 0.099366 | 0.041633  | 2.3867   | 0.017624 | 0.089002 | 1        |
| P29460  | response   | Interleukir | IL-12B      | 157             | 100     | -0.1492  | 0.063267  | -2.35827 | 0.018991 | 0.093566 | 1        |
| P39900  | mucosal hr | Matrix me   | MMP-12      | 182             | 100     | -0.8339  | 0.125529  | -6.64311 | 1.44E-10 | 2.90E-08 | 2.90E-08 |
| P09238  | mucosal hr | Matrix me   | MMP-10      | 161             | 100     | -0.59204 | 0.102061  | -5.80083 | 1.65E-08 | 1.67E-06 | 3.33E-06 |
| Q07325  | mucosal hr | C-X-C moti  | CXCL9       | 133             | 100     | -0.59437 | 0.117374  | -5.06387 | 7.21E-07 | 4.86E-05 | 0.000146 |
| Q16552  | mucosal hr | Interleukir | IL-17A      | 116             | 98.2    | -0.41982 | 0.109202  | -3.84444 | 0.000147 | 0.007427 | 0.02971  |
| P20333  | mucosal hr | Tumor nec   | TNF-R2      | 135             | 100     | -0.21815 | 0.062686  | -3.48014 | 0.000576 | 0.020319 | 0.116357 |
| P16581  | mucosal hr | E-selectin  | SELE        | 108             | 100     | -0.25684 | 0.07408   | -3.46711 | 0.000604 | 0.020319 | 0.121915 |
| P36222  | mucosal hr | Chitinase-; | CHI3L1      | 150             | 100     | -0.34584 | 0.102936  | -3.35972 | 0.000881 | 0.025415 | 0.177905 |
| Q07011  | mucosal hr | Tumor nec   | TNFRSF9     | 187             | 100     | -0.20755 | 0.062819  | -3.30386 | 0.001067 | 0.026947 | 0.215573 |
| Q9HD89  | mucosal hr | Resistin    | RETN        | 143             | 100     | -0.31692 | 0.09743   | -3.25282 | 0.001273 | 0.028562 | 0.257055 |
| P09603  | mucosal hr | Macrophag   | CSF-1       | 109             | 100     | -0.1255  | 0.039573  | -3.17132 | 0.001676 | 0.033782 | 0.338476 |
| P43489  | mucosal hr | Tumor nec   | TNFRSF4     | 172             | 100     | -0.19666 | 0.063066  | -3.11833 | 0.001997 | 0.033782 | 0.403298 |
| P78556  | mucosal hr | C-C motif   | CCL20       | 190             | 100     | -0.4493  | 0.144184  | -3.11613 | 0.002007 | 0.033782 | 0.405382 |
| P05231  | mucosal hr | Interleukir | IL-6        | 113             | 100     | -0.41694 | 0.135764  | -3.07104 | 0.00233  | 0.036203 | 0.470636 |
| P35318  | mucosal hr | Adrenome    | AM          | 103             | 100     | -0.18483 | 0.064149  | -2.88127 | 0.004248 | 0.061298 | 0.858169 |
| P49763  | mucosal hr | Placenta g  | PIGF        | 107             | 100     | -0.14782 | 0.052042  | -2.8403  | 0.004817 | 0.064775 | 0.97312  |
| P15514  | mucosal hr | Amphireg    | AR          | 177             | 100     | -0.26095 | 0.092916  | -2.80839 | 0.005308 | 0.064775 | 1        |

|           |                               |     |     |          |          |          |          |          |   |
|-----------|-------------------------------|-----|-----|----------|----------|----------|----------|----------|---|
| P10145    | mucosal ht Interleukin IL-8   | 101 | 100 | -0.36698 | 0.131525 | -2.79021 | 0.005607 | 0.064775 | 1 |
| P29460    | mucosal ht Interleukin IL-12B | 157 | 100 | -0.22382 | 0.080639 | -2.77558 | 0.005851 | 0.064775 | 1 |
| P55773    | mucosal ht C-C motif c CCL23  | 164 | 100 | -0.19113 | 0.0692   | -2.76204 | 0.006093 | 0.064775 | 1 |
| P29460..P | mucosal ht NA NA NA NA        |     |     | -0.23116 | 0.086331 | -2.67757 | 0.007827 | 0.079053 | 1 |
| P13725    | mucosal ht Oncostatin OSM     | 126 | 100 | -0.33119 | 0.128256 | -2.58227 | 0.010281 | 0.098897 | 1 |
